# Supplementary material for: Transcriptome Analysis of Goat Mammary Gland Tissue Reveals the Adaptive Strategies and Molecular Mechanisms of Lactation and Involution
Source: MDPI journal article supplement (doi:10.3390/ijms232214424), 2022-11-20
Supplement: s1 [file s1]

### Supplementary Materials Tables Title

**Table S1.** Primer sequences and amplification efficiency for real-time quantitative reverse-transcription PCR (RTqPCR).

**Table S2.** Source information and basic statistics of goat mammary glands samples for transcriptome analysis.

**Table S3.** Transcript expression levels of all mammary gland samples.

**Table S4.** Transcripts with expression in the top 20 at each developmental stage.

**Table S5.** Weighted gene co-expression network modules and nodes information.

**Table S6.** Gene ontology functional annotation and Kyoto Encyclopedia of Genes and Genomes (KEGG) pathway enrichment analysis of genes in each module

**Table S7.** Information on differentially expressed transcripts in mammary tissue at different developmental stages.

**Table S8.** Clustering results and Gene ontology and Kyoto Encyclopedia of Genes and Genomes (KEGG) pathway enrichment analysis of differentially expressed transcripts.

**Table S9.** Gene ontology and Kyoto Encyclopedia of Genes and Genomes (KEGG) pathway enrichment analysis of metabolism-related genes.

**Table S10.** Gene ontology and Kyoto Encyclopedia of Genes and Genomes (KEGG) pathway enrichment analysis of immune-related genes.

**Table S11.** Gene ontology and Kyoto Encyclopedia of Genes and Genomes (KEGG) pathway enrichment analysis of mammary gland development-related genes.

**Table S12.** Cluster analysis of genes in the PI3K-Akt signaling pathway.

**Table S13.** Gene ontology and Kyoto Encyclopedia of Genes and Genomes (KEGG) pathway enrichment analysis of genes related to apoptosis and autophagy.
