# Supplementary material for: Transcriptome Analysis of Goat Mammary Gland Tissue Reveals the Adaptive Strategies and Molecular Mechanisms of Lactation and Involution
Source: Int J Mol Sci. 2022 Nov 20;23(22):14424. doi: 10.3390/ijms232214424 (PMC9693614; doi:10.3390/ijms232214424)
Supplement: Supplementary file 1 [file ijms-23-14424-s001.zip]

Archive with 15 entries (15 files):
- Supplementary Figures.pdf
- Supplementary Materials Tabels Titles.pdf
- Table S1.xlsx
- Table S10.xlsx
- Table S11.xlsx
- Table S12.xlsx
- Table S13.xlsx
- Table S2.xlsx
- Table S3.xlsx
- Table S4.xlsx
- Table S5.xlsx
- Table S6.xlsx
- Table S7.xlsx
- Table S8.xlsx
- Table S9.xlsx
