# Supplementary material for: Transcriptome Analysis of Goat Mammary Gland Tissue Reveals the Adaptive Strategies and Molecular Mechanisms of Lactation and Involution
Source: Int J Mol Sci. 2022 Nov 20;23(22):14424. doi: 10.3390/ijms232214424 (PMC9693614; doi:10.3390/ijms232214424)
Supplement: Supplementary file 1 [file ijms-23-14424-s001.zip › Table S1.xlsx]

## Sheet: Primer amplification efficiency
Genes	Slope	R2	Efficiency
FGFR2	-3.678	0.933	87.0195
STAT1	-3.528	0.9111	92.0643
MAPK1	-3.028	0.8923	113.92
PRLR	-3.652	0.9228	87.8549
AKT1	-3.187	0.9347	105.956
IGFBP5	-3.53	0.9328	91.9933
MMP9	-3.638	0.9643	88.3113
MMP19	-3.59	0.9672	89.9116
MMP2	-3.323	0.8892	99.9553
CSN2	-3.778	0.9116	83.946
CSN3	-3.41	0.9094	96.4514
CSN1S1	-3.556	0.9326	91.0798
CSN1S2	-3.406	0.9384	96.6073
IRF6	-3.488	0.9737	93.5073
VEGFA	-3.434	0.9594	95.5265
ESR1	-3.664	0.9246	87.4674
JAK2	-3.264	0.977	102.476
LALBA	-3.651	0.9525	87.8874
IRS2	-3.573	0.9643	90.492
TGFB3	-3.609	0.9655	89.2714
MRPL39	-3.3601	0.997569	98.4315
GAPDH	-3.33438	0.959506	99.4829

## Sheet: Primer sequences
Gene ID	5' primer	3' primer
GAPDH	CCTGCCCGTTCGACAGATAG	TGAAGTCGCAGGAGACAACC
MRPL39	AGCTGTCACTAACTCCCCGA	GACAGTGCCAGGGTCAGTTT
FGFR2	TTCTTCATCGCCTGCATGGT	CAGAAACCTGTCTCCGCAGG
STAT1	CTTCGCTGAGTTAGCCGACA	ACCACTGGGACATCTCTGCG
MAPK1	AACAAAGTCCGAGTCGCCAT	CCTGTTCCACGGCACCTTAT
PRLR	CTGCATCCTCCCACCAGTTC	GGGCCTTCTTGGCTGATTCT
AKT1	CCTGGAGTCGCTTTCCTCAC	TTGGGACACCAAGGTATGGC
IGFBP5	GAGACTCCCGTGAGCATGAG	TCCCATACTTGTCCACGCAC
MMP9	CCGCTATGGCTACACTCCTG	CACCAGAGGTGCCCATCATT
MMP19	CCCCTTCAACCAGAAGACCC	GGGTGGACGGTAGGTTCAAG
MMP2	AGCGATGGTTTCCTCTGGTG	CTGGAAGCGGAATGGGAACT
CSN2	TCGGTGAGACTGTGGAAAGC	GGCCTGGATGGGCATATCTC
CSN3	CTGCCAAGACCAGCCAACTA	TTGGGCTGTGTTGGTCTCAG
CSN1S1	CTCTGAGCGTTACCTGGGTT	GCCAGTTCCTGATTCACTGAG
CSN1S2	GCACCACATCCTGTGAGGAA	GGAGTAAAGGGGCCAGCATT
IRF6	TGTGGCCCAAAACAGAACCT	CACCGGAATGACCTGAACCA
VEGFA	CCTCTCACAGAAAGGAGAGGC	AAGCTGCGCTGGTAGACATC
ESR1	TCCCTTGCCCTTCTATAGCG	CTGAATTTGGCCTGCTTGAGG
JAK2	TGCCGGTATGACCCTCTACA	CGCATAAATTCCGCTGGTGG
LALBA	TCTCTGCTCCTGGTAGGCAT	GGCAAACTGACACCTCCGTA
IRS2	TGACGACACGCATCACAGAA	CTAGCATGCTGCGGGATACA
TGFB3	AACCATAGCGCCCAATCCAC	GATGGGGATACTGGCCAACC
