# Supplementary material for: Transcriptome Analysis of Goat Mammary Gland Tissue Reveals the Adaptive Strategies and Molecular Mechanisms of Lactation and Involution
Source: Int J Mol Sci. 2022 Nov 20;23(22):14424. doi: 10.3390/ijms232214424 (PMC9693614; doi:10.3390/ijms232214424)
Supplement: Supplementary file 1 [file ijms-23-14424-s001.zip › Table S2.xlsx]

## Sheet: Sheet1
sam_ID	SamPeak Lactatione_Name	Group	Total reads	Mapped reads	Mapping rate（%）
SRR11939879	L1	Peak Lactation	4564305	3.8792e+06	84.99
SRR11939878	L2	Peak Lactation	11730783	1.04017e+07	88.67
SRR11939877	L3	Peak Lactation	11347774	9.62745e+06	84.84
SRR11939876	D1	Dry Period	9863614	9.17809e+06	93.05
SRR11939875	D2	Dry Period	9054801	8.51513e+06	94.04
SRR11939874	D3	Dry Period	5742844	5.34946e+06	93.15
SRR11939873	NP1	Involution	8052562	7.3697e+06	91.52
SRR11939872	NP2	Involution	7887881	6.68813e+06	84.79
SRR11939871	NP3	Involution	9594125	8.09936e+06	84.42
SRR11149903	T1_22	Early Lactation	61306251	5.93874e+07	96.87
SRR11149905	T1_27	Early Lactation	62231249	6.00096e+07	96.43
SRR11149908	T1_32	Early Lactation	68051452	6.62413e+07	97.34
SRR11149909	T1_44	Early Lactation	69188502	6.73066e+07	97.28
SRR11149910	T1_54	Early Lactation	68772677	6.61662e+07	96.21
SRR11149906	T1_73	Early Lactation	60658282	5.77891e+07	95.27
SRR11149907	T1_74	Early Lactation	62231607	6.01717e+07	96.69
SRR11149911	T2_22	Late Lactation	60449896	5.78143e+07	95.64
SRR11149897	T2_27	Late Lactation	66634392	6.46287e+07	96.99
SRR11149913	T2_32	Late Lactation	70543595	6.8131e+07	96.58
SRR11149912	T2_44	Late Lactation	67420962	6.36454e+07	94.4
SRR11149914	T2_54	Late Lactation	73691095	7.16941e+07	97.29
SRR11149898	T2_73	Late Lactation	61168429	5.89602e+07	96.39
SRR11149896	T2_74	Late Lactation	75038316	7.2427e+07	96.52
SRR11149902	T3_22	Dry Period	62997384	6.12839e+07	97.28
SRR11149904	T3_32	Dry Period	62524488	5.9911e+07	95.82
SRR11149899	T3_44	Dry Period	65815293	6.41567e+07	97.48
SRR11149901	T3_54	Dry Period	58178100	5.66771e+07	97.42
SRR11149915	T3_67	Dry Period	62564905	6.11384e+07	97.72
SRR11149916	T3_73	Dry Period	70535625	6.89345e+07	97.73
SRR11149900	T3_74	Dry Period	62193952	6.08443e+07	97.83
SRR16355572	LL1	Late Lactation	79128414	7.57575e+07	95.74
SRR16355573	LL2	Late Lactation	73732313	7.06134e+07	95.77
SRR16355574	LL3	Late Lactation	74150886	7.11552e+07	95.96
SRR16355575	DP1	Dry Period	86809313	8.31546e+07	95.79
SRR16355576	DP2	Dry Period	76966530	7.44035e+07	96.67
SRR16355577	DP3	Dry Period	77865292	7.51478e+07	96.51
SRR16355578	LG1	Late Gestation	71343386	6.87822e+07	96.41
SRR16355579	LG2	Late Gestation	74738441	7.14126e+07	95.55
SRR16355580	LG3	Late Gestation	75215472	7.26506e+07	96.59
SRR9992787	E-library	Early Lactation	44469213	4.36154e+07	98.08
SRR9992788	P-library	Peak Lactation	44535311	4.36268e+07	97.96
SRR9992789	L-library	Late Lactation	44584810	4.34969e+07	97.56
