# Supplementary material for: Transcriptome Analysis of Goat Mammary Gland Tissue Reveals the Adaptive Strategies and Molecular Mechanisms of Lactation and Involution
Source: Int J Mol Sci. 2022 Nov 20;23(22):14424. doi: 10.3390/ijms232214424 (PMC9693614; doi:10.3390/ijms232214424)
Supplement: Supplementary file 1 [file ijms-23-14424-s001.zip › Table S3.xlsx]

## Sheet: original count
	P1	P2	P3	D1	D2	D3	NP1	NP2	NP3	T1_22	T1_27	T1_32	T1_44	T1_54	T1_73	T1_74	T2_22	T2_27	T2_32	T2_44	T2_54	T2_73	T2_74	T3_22	T3_32	T3_44	T3_54	T3_67	T3_73	T3_74	LL1	LL2	LL3	DP1	DP2	DP3	LG1	LG2	LG3	E_1	P_1	L_1
LOC102168416	1.30032	1.97904	1.29763	21.2666	12.4218	17.3826	16.4648	1.8325	4.23158	1.10279	2.9954	0.415814	0.43902	0.89385	0.718428	0.500166	2.3264	0.80207	0.41363	2.29067	0.652819	0.56943	1.26218	2.62862	9.84279	15.3449	7.25401	7.82602	5.63917	11.9517	0.271615	0.175291	0.025736	4.45525	2.20457	1.24392	1.13284	1.78052	0.772184	0.40864	0.140695	1.18059
LOC102168816	0	0	0	3.17713	2.62511	2.65769	0	0	0	0.060762	0	0	0	0.060516	0	0.030567	0	0	0.001306	0.134006	0.077279	0.057343	0.194881	0	1.25338	0.130195	0.292125	0.314576	0.256475	0	0.238422	0	0	0.368074	0.515122	0	0.103824	0.588667	0.032708	0.082231	0	0.15373
LOC102168903	4.3816	10.5156	24.0806	1519.46	117.922	45.3723	808.282	55.8852	32.2461	1.76285	57.7563	12.6654	15.2301	4.36087	5.26581	5.50487	14.7141	39.9552	5.88538	11.4242	1.5187	7.24167	11.8415	19.4633	53.6838	89.2184	12.2802	90.5145	24.2657	30.3128	0.098265	0.055542	0.050113	1.64314	0.158494	0.424771	0.027334	0.091467	0.066992	1.7998	0.809405	10.0747
LOC102169377	0	0	0	0	0	0	0	0	0	0	0.0187	0.018027	0	0.012324	0	0	0	0	0	0	0	0	0	0	0	0	0.003624	0.022422	0	0	0	0	0	0.022445	0	0	0	0.001687	0.011582	0	0	0
LOC102170222	0	0	0	0.173661	0	0	0.168092	0	0	0	0	0	0	0	0	0	0	0	0	0	0	0	0.008724	0	0.079725	0	0	0	0	0.022912	0	0	0	0	0	0.079527	0	0	0	0	0	0
LOC102170970	0	0	0	10.5945	710.952	0	0	0	0	0	124.927	0	0.031313	0.026146	4.82937	0	0.058046	0	90.304	148.213	0.122669	3.95269	149.64	258.005	289.967	136.29	235.568	403.379	223.096	84.8077	0	0.386262	0	0.732336	0	0	0	0.226981	0.100455	0	0	4.91115
LOC102171239	0	0	0	0	0	0	0	0	0	0	0	0.052446	0.049981	0	0	0	0	0.053976	0	0.034316	0	0	0.019458	0	0.076781	0.048679	0	0	0	0.028456	0	0	0	0	0	0	0	0	0	0	0.053876	0
LOC102171323	0	0	0	2.01194	0.527935	0.878921	0	0	0	0.009246	0.063533	0	0.024151	0	0	0	0.054539	0.101985	0	0.009881	0	0.092922	0.001852	0	0.153379	0.476591	0	0.077863	0.026873	0.059166	0.003458	0	0	0.00475	0.140993	0	0	0.252616	0	0	0	0.066452
LOC102171594	0	0	0	1.39112	0	0	0	0	0	0	0.066283	0.03573	0.018443	0.004733	0	0	0.034663	0.017975	0.037587	0.220072	0	0	0.028714	0.013144	0.395553	0.421613	0.082817	0.15443	0.077832	0.276984	0.009104	0	0	0.081152	0.11062	0.017732	0.084643	0.024586	0.00065	0.048023	0.033828	0.954167
LOC102171705	0	0	0	0	0	0	0	0	0	0	0	0	0	0	0	0.06161	0	0	0	0	0	0	0	0	0.006388	0	0	0	0	0.000192	0	0	0	0	0	0	0	0	0	0	0	0
LOC102171862	0	0	0	0.210845	1.48629	0	0	0	0	0.033983	0	0	0.028181	0	0	0.011953	0	0.046292	0	0.062777	0	0	0.11588	0.028003	0.22482	0.753241	0.025954	0.127077	0.161589	0.288598	0	0.001274	0.006473	0.093928	0.078703	0.016876	0.015741	0.019507	0.000341	0	0	0.296203
LOC102171971	0	0	0	0	0	0	0	0	0	0.021344	0	0	0	0	0	0	0	0.000601	0	0	0	0	0	0	0	0.085058	0	0.016927	0	0	0	0	0	0	0	0	0	0	0	0	0	0
LOC102172268	0	0	0	0	0	0	0	0	0	0	0	0	0	0	0	0	0.014453	0	0	0	0	0	0	0	0	0	0	0.029587	0.000997	0	0	0	0	0	0	0	0	0	0.000476	0.012213	0	0
LOC102172430	0	0	0	0	0	0	0	0	0	0	0	0	0	0	0	0	0	0	0	0	0	0	0	0	0	0	0	0	0	0	0	0	0	0	0	0	0	7e-05	0	0	0	0.005241
LOC102172893	0	0	0	0	0	0	0	0	0	0	0	0	0	0	0	0	0	0	0	0	0	0	0	0	0	0	0	0	0	0	0	0	0	0	0	0	0	0	0	0	0	0
LOC102173285	0	0	0	0	0	0	0	0	0	0	0	0	0	0	0	0	0	0	0	0	0	0	0	0	0	0	0	0	0	0	0	0	0	0	0	0	0	0	0	0	0	0
LOC102174113	0	0	0	0	0	0	0	0	0	0	0	0	0	0	0	0	0	0	0	0	0	0	0.020787	0	0.006974	0.011619	0	0	0	0	0	0	0	2.3e-05	0	0	0	0	0	0	0	0
LOC102174653	0	0	0	0	0	0	0	0	0	0	0	0	0	0	0	0	0	0	0	0	0	0	0	0	0	0	0	0	0	0	0	0	0	0	0	0	0	0	0	0	0	0
LOC102175948	0	0	0	0	0	0	0	0	0	0	0	0	0	0	0	0	0	0	0	0	0	0	0	0	0	0	0	0	0	0	0	0	0	0	0	0	0	0	0	0	0	0
LOC102175953	0	0	0	0	0	0	0	0	0	0	0.016744	0	0	0	0	0	0	0	0	0	0	0	0	0	0.000558	0	0.000719	0	0.029758	0	0	0	0	0.086868	0.013083	0	0	1.1e-05	0	0	0	0.045333
LOC102176353	0	0	0	0	0	0	0	0	0	0	0	0	0	0	0	0	0	0.041529	0	0	0	0	0	0.389915	0	0	0	0	0	0	0	0	0.084355	1.4e-05	1.99453	2.58575	0.002923	0	0	0	0.010152	0.176113
LOC102176684	30.7405	46.0552	68.9979	976.224	450.816	552.06	284.058	56.8374	21.5535	20.4319	314.114	58.3383	84.6509	28.7216	41.9902	38.0271	94.7812	155.717	47.6557	158.221	24.8204	153.982	108.386	106.385	414.545	530.661	133.606	558.216	340.794	232.711	NA	NA	NA	NA	NA	NA	NA	NA	NA	101.553	47.7493	622.326
LOC102176909	0	0	0	39.6773	0	1.44116	2.10019	1.75434	0.768637	0.011933	2.57274	0.342329	0.210433	0.147941	0.895631	0.068261	0.296059	7.7984	0.092164	0.34787	0.029829	0.323653	0.696523	0.204929	1.23446	0.539256	0.106488	22.7948	0.314229	1.06791	0.058409	0.049375	0.049516	0.262818	7.4e-05	0.502095	2.1e-05	0.00026	0.031131	0.875139	1.16865	5.79917
LOC102178819	0	0	0	0.592634	0	0	0	0	0	0	0	0	0	0	0	0	0	0	0	0	0	0	0	0	0	0	0	0	0	0	0	0	0	0	0	0	0	0	0	0	0	0
LOC102178821	0	0	0	0	0	0	0	0	0	0	0	0	0	0	0	0	0	0	0	0	0	0	0	0	0	0	0	0	0	0	0	0	0	0	0	0	0	0	0	0	0	0
LOC102179160	1.23813	0.690648	0.707242	0	4.88405	9.64914	0	0	3.3636	0	1.75264	0	0	0	0	0	0.737214	0	0	0	0	0	1.38003	0	6.47405	9.66322	4.53774	5.68221	3.92533	6.389	0	0	0	5.63373	0	2.64048	0	1.06495	0	0	0	0
LOC102179658	4.67011	3.78761	15.5243	1121.82	83.9595	87.5132	567.14	38.7719	49.2638	46.6746	668.438	140.233	125.849	63.8593	84.901	68.3806	187.259	82.161	29.8668	63.8337	24.454	98.0226	189.915	95.5693	433.302	409.366	67.2029	1128.22	465.584	264.292	9.44611	3.72732	28.7261	0.680674	133.267	103.199	2.97249	27.1498	2.59582	184.331	158.39	180.153
LOC102179662	0	0	0	0	0	0	0.562923	0	0	0	0	0	0	0.022217	0	0	0	0	0	0	0	0	0	0.00312	0	0	0	0	0	0	0	0	0	0	0	0.009738	0	0.008646	0	0	0	0
LOC102179835	0	0	0.94297	6.10935	1.85418	7.87762	17.5159	0.630814	0	0.448243	0.680585	0.086411	0	0.013004	0	0	0	0.404902	0.144845	0	0	0	0.011592	0	0	1.94376	0.715047	0	0.005874	0	0.057483	0	0	0.677878	0.639317	0.494309	0.249757	0.21682	0.008941	0.212683	0	1.10615
LOC102180026	0	0	0	2.57397	0	0	0	0.285255	0.07438	0	0.110605	0	0	0	0.36202	0	0.027941	0.123263	0.077206	0.090436	0	0	0.00133	0.107567	0.20899	1.99396	0.462765	0.80066	0.166287	0.175595	0	5.2e-05	0	0.277403	0.041829	0.055371	0.001512	0.05321	0.072015	0.035906	0	1.01041
LOC102180300	0	0	0	0	0	0	0	0	0	0	0	0	0.025098	0	0	0	0	0	0	0.019132	0	0	0	0.01056	0	0	0	0	0.033051	0	0	0	0	0.030227	0.000835	0.000132	0	0.010417	0.001628	0	0	0.023165
LOC102180582	0	0	0	0	0	0	0	0	0	0	0	0	0	0	0	0	0	0	0	0	0	0	0	0	0	0	0	0	0	0	0	0	0	0	0	0	0	0	0	0	0	0
LOC102180840	0	0	0	0	0.030216	0	0	0	0	0	0.010294	0	0	0	0.019662	0.002135	0.00345	0	0	0.010549	0	0	0.007618	0	0.063699	0.074855	0.001794	0.011785	0.085061	0	0	0.015224	0	0.177423	1.2e-05	0.000633	0	0.044998	0.005983	0	0	0.033276
LOC102181021	0	0	0	0	1.28319	0	0.39826	0	0	0	0.137736	0	0	0	0	0	0.164659	0.130146	0	0.086027	0.038933	0	0.099011	0.142071	0.311842	0.489474	0.337018	0.208914	0.275623	0.537245	0.047882	0	0	0.572322	0.22802	0	0.163804	0.029284	0.010312	0.070076	0	0.435869
LOC102181031	0	0	0	0	0	0	0	0	0	0	0.318144	0	0	0	0	0.117312	0.221002	0	0.057266	0.093525	0	0	0.154717	0	0.39046	0.755655	0.395214	0.330349	0.471998	0.298414	0	0	0.042238	0.355444	0.323927	0.341979	0.055718	0.307123	0	0	0	0
LOC102181110	0	0	0	0	0	0	0	0	0	0	0.000291	0	0	0	0	0	0	0	0	0	0	0	0	0.000183	0	0	0.000221	0.000173	0	0	0	0	0	0	7e-06	0	0	0	0	0	0	0
LOC102181266	0	0	0	0	0.008343	0	0	0	0	0	0.042226	0	0	0	0.005264	0	0.031502	0	0	0.057296	0.004285	0	0.012497	0	0.015057	0.053586	0.014503	0	0.037904	0.004505	0.002654	0	0	0	0.027056	0.000528	0.017691	0	0	0.018896	0	0.07248
LOC102181379	0	0	0	0	0	0	0	0	0	0	0.005396	0.027076	0	0	0	0.012927	0	0.014734	0.014735	0.001893	0	0.005655	0	0	0.154282	0.512142	0.013071	0.042313	0	0.060723	0	0	9.8e-05	0.184918	0.071219	0.011787	0.002857	0.016403	0.003056	0.03598	0	0.102421
LOC102181857	0	0	0	0	0	0	0	0	0	0	0	0	0	0	0	0	0	0.019817	0	0	0	0	0	0	0.059347	0.036463	0	0.020366	0	0.024409	0	0.006868	0	0.038702	0	0	0.006184	0.002463	0.025911	0.048051	0	0.017985
LOC102181959	0	0	0	0	0	0	0	0	0	0.100231	1.73066	0.188999	0.580643	0.354895	0.842894	0.114175	0.770601	0.124869	1.00327	0.758298	0.422541	0.545142	0.657328	1.61669	3.08351	5.8322	3.28926	4.41617	1.81314	3.66218	0.168459	0.071102	0.207856	1.73955	1.26461	0.56931	0.00921	0.265639	0.017014	0.530012	0	0.759403
LOC102182118	0	0.054785	0	0.174106	0	0	0	0	0	0.086724	0.174719	0.012795	0.061175	0.077887	0.043197	0.024305	0.013569	0.055071	0	0.104845	0.013973	0.140038	0.108997	0.147008	0.497276	0.566224	0.364864	0.168565	0.724933	0.21662	0.038541	0.045661	0.007092	0.182531	0.057688	0.03807	0.062005	0.025301	0.005655	0.241079	0	1.08813
LOC102182213	0	0	0	0	0	0	0	0	0	0	0	0	0	0	0	0	0	0	0	0	0	0	0.030163	0	0.00522	0	0	0	0.025959	0.003105	0	0	0	0.021508	5e-06	0	0	0	0	0	0	0
LOC102182231	0	0	0	5.87591	1.79489	0	0	0	0	0.202014	0.670661	0.452211	0.159873	0.095506	0.151751	0	0	0	0.222354	1.16651	0.07367	0.109699	0.260582	0.310466	3.45168	4.24186	0.315302	0.473803	0.503941	1.21217	0	0	0.084409	0.806507	0.437933	0.394407	0.034999	0.074758	0.372182	0.386312	0	0.332537
LOC102182508	0	0	0	0	0	0	0	0	0	0	6.56691	0	0	0.356935	0	0	0	0	0	2.29406	0	0	0.689345	7.18529	1.96029	7.22371	3.64681	0	0	0	0	0	0	5.44445	1.40738	1.28648	0	2.62502	0.212146	0.29156	0.061366	0
LOC102182686	0	0	0	0	0	0	0	0	0	0	0	0	0	0	0	0	0	0	0	0	0	0	0	0	0	0	0	0	0	0	0	0	0	0	0	0	0	0	0	0	0	0
LOC102182779	0	0	0	1.58738	0	0.475836	0.493165	0	0.280911	0	0	0.01454	0	0.021016	0	0.024741	0.032132	0	0	0	0	0	0.035944	0.096664	0.152267	0.531363	0.114559	0.100513	0.276233	0.114146	0	0	0.010078	0.255891	0	0.010732	0.040977	0.029176	0	0.036275	0.094893	0.035365
LOC102183055	0	0	0	0	0	0	0	0	0	0.026027	0	0	0	0.033162	0	0	0.075513	0	0	0	0	0.00872	0.019069	0.00594	0.091965	0	0.275124	0.224783	0	0.222064	0	0	0	0.315853	0.042164	0.062791	0.047072	0	0	0.001935	0	0
LOC102183413	0	0	0	0	0	0	0	0	0	0	0.001854	0	0	0.009127	0	0	0	0	0	0.000883	0	0	0	0	0	0.000751	0.092712	0	0	0	0	0	0	0	0	0	0	0	0	0	0	0
LOC102183508	0	0	0	0	0	0	0	0	0	0	0	0	0	0	0	0	0	0	0	0	0	0	0.007296	0	0	0	0	0	0	0	0	0	0	0	0	0	0	0	0	0	0	0
LOC102183586	0	0	0	0	0	0	0	0	0	0	0	0	0	0	0	0	0	0	0	0	0	0	0	0	0	0	0.001126	0	0	0.002755	0	6.9e-05	0	0.000348	0	0	0	0	0	0	0	0
LOC102183780	0	0	0	0	0	0	0	0	0	0	0	0	0	0	0	0	0	0	0	0	0	0	0	0	0	0	0	0	0	0	0	0	0	0	0	0	0	0	0	0	0	0
LOC102183862	0	0	0	0	0	0.009232	0	0	0	0	0	0	0	0	0	0	0	0	0	9e-06	0	0	0	0	0.0034	0	0.001325	0.000168	0	0.000616	0	0.000296	0	0	0	0	0	0	0.000315	0	0	0
LOC102183954	0.000608	0	0	0	0	0	0.002069	0	0.001072	0.000774	0.002545	0.004006	0	0.000186	0	0	0	0	0	0.019991	0	0	0.004623	0.001501	0.016511	0.004297	0.001716	0	0	0.010188	0	0	0	8.6e-05	0	0	0	0	0	0	0	0
LOC102184517	0	0	0	0.07821	0	0	0.070466	0.167299	0.009937	0.003314	0	0	0	0	0	0	0	0	0	0	0	0.002235	0	0	0	0	0	0	0.13859	0	0	0	0	0	0	0	0	0	0	0	0	0
LOC102184629	43.2367	31.6836	34.0444	0	0	786.191	124.612	74.6151	23.6702	1.20918	88.2435	12.871	17.3166	4.85156	0	7.22315	6.02664	47.4544	12.8294	25.445	7.44216	0	0	5.58498	63.6692	129.907	29.7548	24.4796	23.8497	46.1576	1.53538	19.9004	0	92.5608	0	1.16792	26.1511	1.72879	0.608946	55.2779	19.2314	418.131
LOC102185081	0	0	0	0	0	0	0	0	0	0	0	0	0	0	0	0	0	0	0	0	0	0	0	0	0	0	0	0	0	0	0	0	0	0	0	0	0	0	0	0	0	0
LOC102185356	0	0	0	0	0	0	0	0	0	0	0	0	0	0	0	0	0	0	0	0	0	0	0	0	0.000816	0	0	0	0	0	0	0	0	0	0	0	0	0	0	0	0	0
LOC102185461	0	74.6318	120.423	8238.63	684.243	0	3334.69	0	181.372	107.666	2716.46	449.056	360.74	186.361	96.4393	235.697	463.734	1509.32	278.825	871.668	174.206	470.412	651.297	414.467	3628.97	3885.49	1067.81	4902.84	1101.78	1656.24	90.7776	41.3747	89.6419	1385.64	208.411	299.338	22.3404	142.964	10.1108	409.419	182.116	2733.46
LOC102185492	0	0	15.1864	54.2926	31.9334	39.5863	64.4269	28.4965	14.9922	0	0	0	0	0	0	0	0	0	0	0	0.043813	0	0	0.100921	0	0	0	0	0	0	0	0	0	0	0	0	0.173575	0	0	0	0	0
LOC102186302	0	0	0	0	0	0	0	0	0	0.002382	0	0	0	0	0	0	0	0	0	0	0	0.021097	0.010561	0.002058	0.211416	0.568082	0	0.458787	0	0	0	0	0	0.020338	0.126128	0.094628	0	0.057007	0.01388	0.003396	0	0.102425
LOC102186383	0	0	0	0	0	0	0	0	0	0	0	0	0	0	0	0	0	0	0	0	0	0	0	0	0	0	0	0	0	0	0	0	0	0	0	0	0	0	0	0	0	0
LOC102186478	49.7625	117.085	135.67	2980.76	516.755	530.003	617.4	244.752	125.101	43.5876	374.297	56.892	89.5904	65.6588	19.4889	13.9005	170.809	75.4475	45.4984	73.2917	85.2191	63.021	129.063	234.533	382.992	209.366	448.438	596.913	94.7233	259.681	0	0.001023	0.000106	0.001352	0.001025	15.6353	0.003127	2.94429	0.36991	0.000815	0.270921	774.305
LOC102187478	0	0	0	0	0	0	0	0	0	0	0	0	0	0	0	0	0	0	0	0	0	0	0	0	0	0	0.059051	0.00824	0.065581	0	0	0	0	0	0.000339	0.000226	0	0	0	0	0	0
LOC102190772	0	0	0	0	0	0	0	0	0	0	0.004369	0	0	0	0	0	0	0	0	0	0	0	0	0	0.000454	0.018537	0	0	0.000226	0	0	0	0	0	0	0.000147	0	0	0	0.000166	0	0
LOC102190954	0	0.113693	0	2.4948	0	0	0.296001	0	0	0.135389	0.233389	0	0	0	0	0	0.175592	0.052531	0.087096	0.11674	0	0.079698	0	0.187015	0.397543	0.757936	0.152172	0	0.224532	0.261448	0.051395	NA	0	NA	0	NA	NA	NA	0.27268	0.149814	0	0
LOC102191415	0.272532	0.147708	9.20356	294.218	55.6258	79.7128	161.034	5.93549	6.30222	0.063983	38.8728	12.5351	6.45724	0.640764	4.27143	6.66808	19.3359	14.3485	6.52475	20.3336	5.41038	39.0783	18.5773	27.597	54.2762	43.2715	20.9355	132.323	75.7086	41.4138	5.06217	3.09547	1.23913	24.0639	5.36093	5.79007	0.92001	0.179469	1.3541	2.07127	10.0142	23.0037
LOC102191761	0	0	0	0	0	0	0	0	0	0	0.355909	0	0	0.079016	0	0.096403	0	0	0	0.626688	0	0	0.134558	0.098584	0.79593	1.05026	0	0.718104	0.455306	0.944813	0	0	0	0.075918	0.086698	0	0.088552	0.184951	0.067977	0	0	0.148515
LOC106501854	0	0	0	0.446803	0	0	0.181391	0	0	0.019336	0.061206	0.012103	0	0.021828	0	0	0	0	0	0.013634	0	0	0	0.003109	0.11975	0	0.039264	0	0	0	0	0	0	0	0.057183	0	0.060147	0.06326	0	0	0	0.011428
LOC106503875	0	0	0	0	0	0	0	0	0	0	0	0	0	0	0	0	0	0	0	0	0	0	0	0	0	0	0	0	0	0	0	0	0	0	0	0	0	0	0	0	0	0
LOC106503879	0	0	0	0	0	0	0	0	0	0	0	0	0	0	0	0	0	0	0	0	0	0	0	0.043571	0	0	0	0	0	0	0	0	0	0	0	0	0	0	0	0	0	0
LOC106503923	0	0	0	0.400133	0	0	0	0	0	0	0	0	0	0	0	0	0.227394	0	0.063716	0	0	0	0.187762	0	0	0	0	0	0	0.510677	0.042765	0	0.088242	0.449392	0	0	0	0.533741	0	0	0	0
LOC106503924	0	0	0	0	0	0	0	0	0	0	0.000928	0	0	0	0	0	0	0	0	0	0	0	0.002413	0	0.00144	0	0.006535	0	0.002563	0	0	0	0	0	0	0	0	0	0	0	0	0
LOC106503948	0.162577	0	0	0	0	0	0.190135	0	0	0	0	0	0	0	0	0.000186	0.005422	0	0.001003	0.000461	0	0	0	0	0	0.193059	0	0.044433	0	0.001647	0	0	0	0.055605	0	0.102023	0	0.009477	0.016113	0	0.003804	0.022703
LOC106503994	0	0	0	0	0	0	0	0	0	0	0.041127	0.081282	0	0	0	0	0.019246	0	0	0.087591	0	0.042305	0	0	0	0.22625	0	0	0.366353	0	0	0	0	0	0	0	0	0	0	0	0	0
LOC108633304	0	0	0	0	0	0	1.00765	0	0	0	0	0.082011	0	0	0	0	0.085429	0	0.071265	0.182939	0	0	0.05162	0.10461	1.16533	0.413499	0	0.569963	0.374114	0.562278	0.077896	0	0	0.341724	0	0.134796	0	0.423695	0.024971	0	0	0.47631
LOC108634613	0	0	0	1.00149	0.514008	0.841809	0.607335	0.467077	0.406301	0.063031	0.220341	0.035179	0.132759	0.054249	0.062073	0.122711	0.397072	0.057948	0.066871	0.30366	0.049449	0.076291	0.15053	0.029264	1.10259	1.17065	0.121709	1.32094	0.420359	0.662262	0	0.072517	0.034278	1.42807	0.173518	0.051993	0.275766	0.152427	0.008902	0.17813	0.102262	0.607663
LOC108634614	0	0	0	0	0	0	0	0	0	0	0	0	0	0	0	0	0	0	0	0	0	0	0	0	0	0	0	0	0	0	0	0	0	0	0	0	0	0	0	0	0	0
LOC108634635	0	0	0	1.91628	0	1.63739	0	0	0	0	0.169	0	0	0	0	0	0	0	0	0	0	0	0.102567	0	1.96209	0.716384	0.118462	0	0.319194	0	0	0	0	0.977314	0.347567	0.137421	0.476105	0	0.08027	0	0	0.446944
LOC108634637	0	0	0	0	0	0	0.416236	0	0	0.035311	0	0	0	0	0	0	0	0	0	0	0	0	0	0	0	0.369249	0	0	0.138562	0.275042	0	0	0	0.352344	0	0	0.084956	0	0	0	0	0.183555
LOC108634638	0	0	0	1.78743	0.234205	0	0	0.942784	0	0.035185	0	0.05015	0	0	0	0.058102	0.160241	0	0.030079	0.023383	0	0	0.056361	0	2.02598	0.072752	0	0.062945	0.096014	0.329346	0	0	0	0.296538	0.025468	0	0.230645	0	0	0.065424	0	0.215744
LOC108634665	0	0	0	0	0	0	0	0	0	0.05633	0	0	0	0	0	0	0	0	0	0	0	0	0	0	0	0	0	0	0	0	0	0	0	0	0	0	0	0	0	0	0	0
LOC108634672	0	0	0	0	0	0	0	0	0	0	0	0	0	0	0	0	0	0	0	0	0	0	0	0	0	0	0	0	0	0	0	0	0	0	0	0	0	0	0	0	0	0
LOC108634687	0	0	0	0	0	0	0	0	0	0	0	0	0	0	0	0	0	0	0	0	0	0	0	0	0	0	0	0	0.147387	0	0.01303	0	0.030337	0	0	0	0	0	0	0	0	0
LOC108634688	0	0	0	0	0	0	0	0	0	0	0	0	0	0	0	0	0	0	0	0	0	0	0.01471	0	0.657773	0	0	0	0	0	0	0	0	0	0	0.036921	0	0	0	0.133404	0	0
LOC108634768	0	0	0	0	0	0	0	0	0	0.338256	0.126087	0	0	0	0	0	0.193145	0	0.083137	0	0	0	0.103759	0	6.82497	0.157924	0	0	0.002369	1.68407	0	0	0	0	NA	0	0.213858	0	0	0	0	0
LOC108634857	0	0	0	1.92995	0	0	0.948478	0	0.25907	0.045913	0.054415	0	0	0	0	0	0	0.02195	0	0.031233	0	0.042079	0.012611	0	0.191157	0.194253	0	0.120407	0	0.228751	0	0.014065	0	NA	0	0.022301	NA	0	0	0.028929	0	0.067021
LOC108634937	0	0	0	0	0	0	0	0	0	0	0.093203	0	0	0	0	0	0	0	0	0.025673	0	0	0	0.070334	0.116873	0.143471	0	0.23647	0.173799	0	0	0	0	0.104771	0	0	0	0	0	0.043006	0	0
LOC108635045	0	0	0	3.57391	0	0	0.770056	0	0	0.062437	0	0	0.01157	0	0	0	0	0.020393	0	0.026223	0.012837	0	0	0	0.202436	0.02566	0	0	0	0.107165	NA	0	0	NA	NA	0	0	0	0	0	0	0
LOC108635126	0	0	0	4.36864	0	0.739178	1.48698	0	0	0	0.063811	0.039418	0.045743	0.028062	0.009311	0.033827	0	0.027913	0.013174	0.126215	0	0.027714	0.042948	0.054522	0.189736	0.308163	0.054354	0.068617	0.155723	0.12088	0	0.082438	0.022708	0.789478	NA	NA	NA	NA	0.118891	0.053636	0.052669	0.083234
LOC108635153	0	0	0	1.76758	1.11805	0	0	0	0	0.014537	0	0	0	0	0	0	0	0	0	0	0.012813	0	0	0	0.35065	0.082433	0	0	0	0.211345	0.0573	0	0	0.017983	0.013584	0	0	0	0	0	0	0
LOC108635230	0	0	0	0	0	0	0	0	0	0	0	0	0	0	0	0	0	0	0	0	0	0	0.020608	0	0	0	0	0	0	0	0	0	0	0	0	0	0	0	0	0	0	0
LOC108635262	0	0	0	0	0	0	0	0	0	0.086784	0.404216	0.092111	0	0	0.125432	0	0	0.015359	0	0	0	0	0.174429	0.04405	0.346595	0.3066	0	0.220703	0.236447	0.212736	0	0	0	0	NA	NA	NA	0.268325	NA	0.041333	0	0
LOC108635299	0	0	0	0.993176	0	0	0	0	0	0	0.058081	0	0	0	0	0	0.197933	0.007797	0	0.103354	0	0	0.070762	0.040015	0.149548	0.252114	0	0.156267	0.038213	0.271363	NA	0	NA	NA	0	NA	0	0.054374	0.056049	0	0.07705	0.162134
LOC108635336	0	0	0	3.81187	0	1.10284	1.56119	0	0	0	0.071151	0.044673	0.043447	0.029462	0.009775	0.035516	0.028451	0.03226	0.013831	0.130421	0	0.029097	0.069988	0.050702	0.202922	0.16358	0.057067	0.068708	0.163494	0.211637	0	0.086552	0.023842	0.828879	NA	NA	NA	NA	0.124824	0.056312	0.055298	0.102488
LOC108635353	0	0	0	0	0	0	0	0	0	0.032602	0.023602	0	0.071177	0	0	0	0	0	0	0.134234	0	0	0.246637	0.175165	0	0.182486	0	0	0.328649	0.22198	0	0.074557	0	0.633715	0	0.087437	0	0	0	0	0	0.214828
LOC108635354	0	0	0	0	0	0	0	0	0	0	0	0	0	0	0	0	0	0	0	0	0	0	0	0	0	0	0	0	0	0	0	0	0	0.074241	0	0	0	0	0	0	0	0
LOC108635432	0	0	0	1.47678	0.690561	0	1.19959	0	0	0	0.101696	0	0.02178	0.00994	0	0	0.097957	0	0	0.060041	0.02755	0	0.042429	0	0	0.401965	0.14873	0.105235	0.220744	0	0.01175	0.060227	NA	NA	NA	NA	0.071091	NA	NA	0.062804	0	0.067729
LOC108635440	0	0	0	0	0	0	0	0	0	0	0.170791	0.010255	0	0	0.050239	0	0	0.008815	0	0	0	0	0	0.00737	0.08625	0.178901	0	0.040003	0.191663	0.232736	0	0	0	0	NA	0.083628	NA	NA	0.066961	0.038595	0	0
LOC108635466	0	0	0	1.64785	0	0	0	0	0	0	0	0	0	0	0	0	0.102345	0	0	0.054218	0	0	0	0	0.174896	0.443255	0	0	0.150801	0	0	0	NA	0	0	0	0	NA	NA	0	0	0.017768
LOC108635472	0	0	0	1.606	0	0	1.34318	0	0	0.027432	0.0481	0	0	0	0	0	0.02476	0.019062	0	0.046448	0	0.07537	0.045189	0	0.127373	0.203545	0	0.104564	0	0.430009	0	NA	0	0.181153	0	NA	0.021531	0	0.016003	0.118727	0	0.049672
LOC108635829	0	0	0	0	0	0	0.713385	0.440832	0	0.005137	0.035656	0	0.002235	0	0	0.000839	0.003382	0	0.046005	0.012488	0.000138	0.004266	0.029535	0	0.014903	0.104964	0	0.002404	0.027893	0.071324	0	0	5.6e-05	0	0.072935	0	0.004726	0	0	0	0.005599	0.25688
LOC108635830	0	0	0	0.033767	0	0	0.06528	0	0	0	0	0	0	0	0.019069	0	0	0	0	0	0	0	0	0	0.015337	0	0	0	0	0.029502	0	0	0	0.003301	0	0	0	0.002901	0	0	0	0.063284
LOC108635839	0	0	0	0.241683	0.071572	0	0.48435	0	0	0.020709	0.283007	0	0.006741	0.092415	0.018715	0.003758	0	0.053118	0.028383	0.227717	0.027175	0.149148	0.19891	0.102417	0.850235	1.09191	0.403577	0.740572	0.603369	0.583792	0	0.000484	0.008784	0.317904	0.103519	0.039903	0.203397	0.176188	0.117095	0	0.107253	1.12121
LOC108635873	0	0	0	0	0	0	0	0	1.44497	0.36344	0	0	0	0	0	0	0	0	0.395504	0	0	0	0	0	0	0	0	0	0	0	0	0	0	0	0	0	0	0	0.011528	0	0	0
LOC108635874	0	0	0	0	0	0	0	0	0	0	0	0	0	0	0	0	0	0	0	0	0	0	0	0	0	0	0	0	0	0	0	0	0	0	0	0	0	0	0	0	0	0
LOC108635875	0	0	0	0	0	0	0	0	0	0.032857	0.046923	0	0	0	0	0	0	0	0	0	0	0	0	0	0	0	0	0	0	0	0	0	0	0	0.292181	0	0.038057	0	0	0	0	0.088271
LOC108635876	0	0	0	0	0	0	0	0	0.265742	0.02543	0.106224	0.02802	0.037331	0.024848	0.013338	0	0	0	0.01642	0.152587	0	0.034686	0.016855	0	0.131342	0.482279	0.019062	0.089237	0.268043	0.040094	0	0.000656	0	0.033597	0.043875	0.036256	0.045957	0.000114	0.022864	0	0	0.158473
LOC108635877	0	0	0	0	0	0	0.779714	0	0	0.066344	0	0	0	0	0	0	0	0	0	0	0	0	0	0	0	0.379142	0	0	0	0	0	0	0	0	0	0	0.109216	0	0	0	0	0.023468
LOC108635878	0	0	0	0	0	0	0	0	0	0	0	0	0	0	0	0	0	0	0	0	0	0	0	0	0	0	0	0	0	0	0	0	0	0	0	0	0	0	0	0	0	0
LOC108635879	0	0.004206	0	0	0	0	0	0	0	0	0	0	0	0	0	0	0	0	0	4.3e-05	0	3.1e-05	0	0	0.000106	0	0	0	6.1e-05	0.003589	0	0	0	0	0	0	0	0	0	0	0.00019	0
LOC108635880	0	0	0	0	0	0	0	0	0	0	0	0	0	0	0	0	0	0	0	0	0	0	0	0	0	0	0	0	0	0	0	0	0	0	0	0	0	0	0	0	0	0
LOC108635881	0	0	0	0	0	0	0	0	0	0	0	0	0	0	0	0	0	0	0	0	0	0	0	0	0	0	0	0	0	0	0	0	0	0	0	0	0	0	0	0	0	0
LOC108635882	0	0	0	0	0	0	0.72463	0	0	0.049322	0.129634	0	0.067366	0.001141	0	0.019861	0.000719	0	0.002199	0.108413	0	0.008355	0.048508	0.075182	0.199319	0.314205	0	0	0.10858	0.500989	0.019661	0.026812	0	0.109981	0.026621	0.103719	0.075578	0.087774	0	0.05931	0.003098	0.533991
LOC108635883	0	0	0	0.097496	0	0	0	0	0	0	0	0	0	0	0	0	0	0	0	0	0	0	0	0	0	0	0	0	0	0	0	0	0	0	0	0	0	0	0	0	0	0
LOC108635885	0	0	0	0.11248	0	0	0.396631	0	0	0	0.100712	0	0	0.00975	0	0	0	0	0	0	0.011072	0.051892	0	0	0	0.237693	0.015753	0	0.064524	0.098368	0.004342	0.006834	0	0.060534	0	0	0	0.023479	0	0	0	0.177458
LOC108635886	0	0	0	0	0	0	0	0	0	0	0	0	0	0	0	0	0	0	0	0	0	0	0	0	0	0	0	0	0	0	0	0	0	0	0	0.012254	0	0	0	0	0	0
LOC108635887	0	0	0	0	0	0	0	0	0	0	0	0	0	0	0	0	0	0	0	0	0	0	0	0	0	0	0	0	0	0	0	0	0	0	0	0	0.003642	0	0	0	0	0
LOC108635888	0	0	0	0	0	0	0	0	0	0	0	0	0	0	0	0	0	0	0	0	0	0	0	0	0	0	0	0	0	0	0	0	0	0	0	0	0	0	0	0	0	0
LOC108635889	0	0	0	0	0	0	0	0	0	0	0	0	0	0	0	0	0	0	0	0	0	0	0	0	0	0	0	0	0	0	0	0	0	0	0	0	0	0	0	0	0	0
LOC108635892	0	0	0	0	0	0	0	0	0	0.025894	0	0	0.020821	0	0	0	0.016225	0	0.031008	0	0	0	0	0.069627	0.120933	0.29454	0.009186	0.042885	0.100321	0.02474	0	0	0	0.059108	0.008553	0.021736	0.021224	0.009919	0.01067	0	0	0.024064
LOC108635897	0	0	0	0	0	0	0	0	0	0	0.788559	0.253438	0	0	0	0	0	0	0	0.151561	0	0	0	0.342698	0.241042	0.386673	0.13857	0.32774	0.173014	0.220786	0.106486	0.108288	0	0.015123	1.92541	0.357667	0.396661	0.017774	0	0.000965	0.201541	1.63019
LOC108635900	0	0	0	0	0	0	0	0	0	0	0.521022	0.04315	0.030814	0	0	0	0.201821	0.004404	0.004431	0.068302	0	0	0.334961	0	1.27108	1.50477	0.429794	1.21457	0	1.75442	0.008872	0	0	1.11815	0.037835	0.15144	0.029128	0.009517	0.000254	0	0	0
LOC108635901	0	1.28484	0	0	0	3.94741	0	0	0	0	0.871156	0.089048	0	0	0	0.050488	0.696109	0.239448	0	0.627671	0.061292	0.18427	0.314536	0.355276	3.80688	6.62983	1.80387	3.93487	1.94932	3.02744	0	0.023661	0	2.63783	0	0.737989	0	0.968556	0	0.076169	0	0
LOC108635902	0	0.595596	0	0	0	3.95728	0	0	0	0	1.10276	0.068964	0	0	0	0.005076	0.668059	0	0	0.424493	0	0	0.439466	0	1.29256	6.86268	1.83011	3.0747	1.54392	1.9735	0	0	0	0.392508	0	0.700993	0	0	0.089503	0	0	0
LOC108636868	0	0	0	1.13623	0	0	1.79996	0	0	0.05108	0	0	0	0	0	0	0.033461	0	0	0	0.027606	0	0	0.02162	0.013145	0.052342	0	0.014634	0	0.083731	0	0	0	0	0.037488	0.029481	0	0	0	0	0	0
LOC108636869	0	0	0	0	0	0	0	0	0	0	0	0	0	0	0	0	0	0	0	0	0	0	0	0	0	0	0	0	0	0	0	0	0	0	0	0	1.8e-05	0	0	0	0	0
LOC108636870	0	0	0	0	0	0	0	0	0	0	0	0	0	0	0	0	0	0	0	0	0	0	0	0	0	0	0	0	0	0	0	0	0	0	0	0	0	0	0	0	0	0
LOC108636871	0	0	0	0	0	0	0	0	0	0	0	0	0	0	0	0	0	0	0	0	0	0	0	0	0	0	0	0	0	0	0	0	0	0.01746	0	0	0	0	0	0	0	0
LOC108636872	0	0	0	0	0	0	0	0	0	0.009962	0.010549	0	0	0	0	0	0.01333	0	0	0.008894	0	0	0.013138	0.010573	0.130225	0.216229	0.002214	0.081468	0	0.034545	0	0	0	0.144267	0.010024	0.116705	0.038866	0.02673	0.01404	0	0	0.016712
LOC108636873	0	0	0	0	0	0	0.003614	0	0	0	0	0	0	0	0	0	0	0	0	0	0	0	0	0	0	0.00327	0	0	0	0	0	0	0	0	0	0	0	0	0	0	0	0
LOC108636874	0	0	0	0	0	0	0	0	0	0	0.000637	0	0	0	0	0.000689	0	0.001563	0	0	0	0	0	0.001787	0.003469	0.02349	0	0.024631	0.000602	0.000528	0	0	0	0.004876	0.00079	0	0.001771	0	0.003816	0	0	0
LOC108636875	0	0	0	0	0	0	0	0	0	0	0.063454	0	0.0226	0.033772	0.026313	0	0	0.032982	0	0.226679	0	0.041628	0.030163	0	0.221159	0.881836	0.107246	0.607953	0.111207	0.302408	0.000503	0	0.007032	0.641845	0.323057	0.188478	0.114521	0.192441	0.049013	0.039557	0	0.095241
LOC108636876	0	0	0	0	0	0	0	0	0	0	0	0	0	0	0	0	0	0	0	0	0	0	0	0	0	0	0	0	0	0	0	0	0	0	0	0	0	0	0	0	0	0
LOC108636878	0	0	0	0	0.439617	0	0	0	0	0.004209	0.06199	0.023921	0	0	0	0	0.026293	0	0.058686	0	0	0	0.054887	0.013207	0.211661	0.152187	0	0.031559	0.097498	0.065472	0	0	0	0.108147	0.02523	0.000465	0.021558	0.096187	0.019768	0	0	0.117173
LOC108636879	0	0	0	0	0	0	0	0	0	0.00369	0	0	0	0	0	0.00216	0	0	0	0	0	0	0.001568	0	0	0	0	0.00302	0	0	0	0	0	0.00458	1.2e-05	0	0	0	0	0	0	0.035123
LOC108636880	0	0	0	0	0	0	0	0	0	0	0	0	0	0	0	0	0	0	0	0	0	0	0	0	0	0	0	0	0	0	0	0	0	0	0	0	0	2e-06	0	0	0	0
LOC108636882	0	0	0	0	0	0	0	0	0	0	0	0	0	0	0.025785	0	0	0	0	0	0	0	0	0	0.1828	0.032648	0	0.064762	0	0.058917	0	0	0	0.096651	0.012539	0	0.046342	0.020047	0	0.002114	0	0
LOC108636883	0	0	0	0	0	0	0	0	0	0	0	0.030177	0	0	0	0	0	0	0	0	0	0	0.014715	0	0	0	0	0	0	0.115914	0	0	0	9.1e-05	0.026062	0	0	0	0	0	0	0.000661
LOC108636885	0	0	0	0	0	0	0	0	0	0	0	0	0	0	0	0	0	0.002879	0	0	0	0	0	0	0.001852	0.00646	0	0	0	0	0	0	0	0	0	0	0	0	0.001694	0	0	0
LOC108636886	0	0	0	0	0	0	0	0	0	0	0	0	0	0	0	0	0	0	0	0	0	0	0	0	0	0	0	0	0	0	0	0	0	0	0	0	0	0	0	0	0	0
LOC108636887	0	0	0	0	0	0	0	0	0	0.091029	0.538953	0.071095	0	0.179169	0.294389	0.05187	0.094461	0.271046	0	0.905019	0.186436	0.111577	0	0.221447	0.882188	4.23716	0.985225	2.51387	1.38322	3.34231	0.002695	0	0.000471	0.169995	0.276765	0.099085	0.071247	0.104284	0.029822	0.249981	0	1.02625
LOC108636888	0	0	0	0	0	0	0	0	0	0.016458	0.052021	0	0	0	0	0	0	0	0	0.008122	0	0.008844	0	0.157509	0	0.396894	0	0.189036	0.063399	0.093536	0	0	0	0	0.002924	0	0.001418	0	0.020473	0	0	0.015729
LOC108636889	0	0	0	0	0	0	0	0	0	0	0	0	0	0	0	0	0	0	0	0	0	0	0	0	0	0	0	0	0	0	0	0	0	0	0	0	0	0	0	0	0	0
LOC108636890	0	0	0	0	0	0	0	0	0	0	0	0	0	0	0	0	0	0	0	0	0	0	0	0	0	0	0	0	0	0	0	0	0	0	0	0	0	0	0	0	0	0
LOC108636891	0	0	0	0	0	0	0	0	0	0	0	0	0	0	0	0	0	0	0	0	0	0	0	0	0	0	0	0	0	0	0	0	0	0	0	0	0	0.000116	0	0	0	0
LOC108636892	0	0	0	0	0	0	0	0	0	0	0	0	0	0	0	0	0	0	0	0	0	0	0	0	0	0	0	0	0	0.000144	0	0	0	0	0	0	0	0	0	0	0	0
LOC108636893	0	0	0	0	0	0	0	0	0	0	0	0	0	0	0	0	0	0	0	0	0	0	0	0	0	0	0	0	0	0	0	0	0	0	0	4e-06	0	0	0	0	0	0
LOC108636894	0	0	0	0	0	0	0	0	0	0	1.3e-05	0.012673	0	0	0	0	0	0	0	0	0	0	0	0.009823	0	0.009317	0.00959	0.00157	0.000849	0.015663	0	0	0	0.008576	0.012039	0.002801	0	8.9e-05	0	0	0	0.009365
LOC108636895	0	0	0	1.36197	0	0	1.19501	0.001274	0	0.032377	0.125083	0.08707	0	0	0.852064	0	0.038412	0.000171	0	0.063538	0.002544	0	0.009824	0.004836	0.241624	1.50993	0.07417	0.776876	0.55297	0.210758	0.021607	0	0	0.29343	0.056795	0.048966	0.036913	0.08921	0.007394	0	0.031747	0.555967
LOC108636896	0	0	0	0	0	0	0.03129	0	0	0	0	0	0	0	0	0	0	0	0	0	0	0	0	0	0.005758	0	0	0	0	0	0	0	0	0	0	0	0	0	0	0	0	0
LOC108636897	0	0	0	0	0	0	0	0	0	0	0.08567	0.017868	0.042135	0	0	0	0.057029	0	0	0.245148	0	0.038054	0.016089	0.06366	0	2.03405	0.371858	0.391889	0.311743	0.166543	0	0	0.00625	0.557713	0.0354	0.16269	0.061932	0.077627	0.031557	0.050936	0	1.37316
LOC108636911	0	0	0	0	0	0	0	0	0	0	0	0	0	0	0	0	0	0.007809	0	0	0	0	0	0	0	0	0	0	0	0.000475	0	0	0	0	0	0	0	0	0	0	0	0.002667
LOC108636912	0.002252	0	0	0	0	0	0.031333	0	0	0	0.003765	0	0	0	0	0	0	0	0	0	0	0	0.001782	8.9e-05	0	0	0.000348	0.004759	0.002354	0.12888	0	0	0.004489	0	0	0	0.000297	0	0.00031	0	0	0
LOC108636914	0	0	0	0	0	0	0	0	0	0	0.000426	0	0	0	0	0	0	0	0.001088	0	0	0	0.00287	0	0.001521	0.039646	0.013685	0	0.002872	0.014983	0	0	0	0.002527	0.000356	5e-06	0.02307	6.6e-05	0	0	0.037696	0.047083
LOC108637004	0	0	0	0.036914	0.002399	0	0	0	0	0.018727	0	0.002394	0	0	0	0	0	0.006411	0	0.01701	0	0.002374	0.003618	0	0.011002	0.03068	0	0	0.007225	0	0	0	0	0	0	0.043752	0	0	0	0	0.030999	0.175716
LOC108637005	0	0	0	0.996017	0.269548	0	0.550962	0	0	0	0.074371	0	0	0	0.143407	0	0	0.023058	0.010414	0.164336	0	0	0.017891	0.001994	0	0	0	0	0.287439	0	0	0	0	8.5e-05	0.00812	0	0.000265	0.01668	0	0	0	0.404269
LOC108637082	0	0	0	0	0	0	0	0	0	0	2.26421	0	0	0	0	0	0	0	0.515079	0.040138	0	0	0.291103	0	0.365975	0	0.294149	3.68457	0	0	0	0	0	0	0	0	0	0	0	0	0.119219	0
LOC108637840	0	2.03415	2.40634	0	38.595	44.6619	31.7015	21.4478	3.24813	0.203802	67.0278	3.50932	11.1279	1.6109	5.03446	0.62001	1.46131	10.1941	3.68223	6.21222	3.99135	17.4539	4.67058	0.461372	21.6577	13.8399	21.2983	89.6892	28.9225	7.60742	0.037643	0.00014	0.026571	0.349324	0.090296	0.348154	0.029833	0.012584	0.000641	7.30572	2.59153	87.7383
LOC108637841	28.6083	4.08721	16.6511	302.851	0	124.483	439.03	71.9522	7.53466	5.30176	42.362	30.2607	42.7466	0	0	3.06535	71.0084	16.4868	12.8978	9.57488	13.6346	0.874604	36.7394	32.9537	128.079	43.1113	71.5878	129.956	1.77331	81.8144	0	1.02866	0.000406	12.1291	0.031535	0.013032	0.290041	0.870896	1.15931	84.2999	56.906	449.89
LOC108637842	12.3485	0.699944	22.2991	438.994	68.0783	76.1403	140.914	8.74365	13.6729	0.121843	41.9929	1.97215	1.87204	10.9665	3.62902	5.5564	3.31595	32.0437	1.9284	4.15434	12.0231	14.7185	13.8774	3.20855	16.5984	58.6733	50.9646	82.6373	24.5673	29.0264	NA	NA	NA	NA	NA	NA	0.164165	NA	NA	6.81896	4.34584	48.2871
LOC108637843	9.08404	0	21.6268	0	0	0	0	0	0	0	0.86695	0	2.17184	0	0	0	0	0	0.70305	0	0	0	0	0	0	0	4.26899	18.6934	0	0	0.014196	0	0	0.023191	0	0	0.000507	0	0	0.883185	0	4.05638
LOC108638495	4.54406	3.89036	19.5515	346.515	64.6129	60.4276	233.612	24.9243	23.917	24.2048	586.662	103.654	107.345	29.7944	45.4536	39.7928	98.6955	128.199	45.5851	123.297	25.7362	109.701	128.409	111.21	270.016	298.558	109.295	716.646	303.923	194.044	0.751588	7.5854	4.63115	0.020018	15.7002	19.5001	1.9612	5.43608	0.935369	116.164	85.5634	495.045
MIR1	0	0	0	0	0	0	0	0	0	0	0	0	0	0	0	0	0	0	0	0	0	0	0	0	0	0	0	0	0	0	NA	0	0	0	0	0	0	0	0	0	0	0
MIR100	0	0	0	0	0	0	0	0	0	0	0	0	0	0	0	0	0	0	0	0	0	0	0	0	0	0.049491	0	0	0	0	0	0	0	NA	NA	0.91752	0	NA	NA	0.015124	0	0.017032
MIR100_1	0	0	0	0	0	0	0	0	0	0	0	0	0	0	0	0	0	0	0	0	0	0	0	0	0	0.049195	0	0	0	0	0	0	0	NA	NA	0.943007	0	0.112079	NA	0	0	0.026997
MIR101	0	0	0	0	0	0	0	0	0	0	0	0	0	0	0	0	0	0	0	0	0	0	0	0	0	1e-06	0	0	0	0	NA	0	NA	4e-06	1e-05	NA	0	1e-06	8e-06	0	1e-06	9e-06
MIR101_1	0	0	0	0	0	0	0	0	0	0	0	0	0	0	0	0	0	0	0	0	0	0	0	0	0	2e-06	0	0	0	0	NA	0	0	2e-06	6e-06	NA	0	0	2e-06	4e-06	0	2.8e-05
MIR103	0	0	0	0	0	0	0	0	0	0	0.018741	0	0	0	0	0	0.001633	0	0	0	0	0	0	0	0	0	0	0	0.029024	0.033793	0	0	0	NA	NA	NA	NA	0	0	0	0	0
MIR103_1	0	0	0	0	0	0	0	0	0	0	0.057389	0	0	0	0	0	0	0	0	0	0	0	0	0	0	0	0	0	0	0.046323	0	0	0	NA	NA	NA	0.463176	0	NA	0	0	0
MIR105A	0	0	0	0	0	0	0	0	0	0	0	0	0	0	0	0	0	0	0	0	0	0	0	0	0	0	0	0	0	0	0	0	0	0	0	0	0	0	0	0	0	0
MIR105B	0	0	0	0	0	0	0	0	0	0	0	0	0	0	0	0	0	0	0	0	0	0	0	0	0	0	0	0	0	0	0	0	0	0	0	0	0	0	0	0	0	0
MIR105B_1	0	0	0	0	0	0	0	0	0	0	0	0	0	0	0	0	0	0	0	0	0	0	0	0	0	0	0	0	0	0	0	0	0	0	0	0	0	0	0	0	0	0
MIR106A	0	0	0	0	0	0	0	0	0	0	0	0	0	0	0	0	0	0	0	0	0	0	0	0	0	0	0	0	0	0	0	0	0	0	0	0	0	0	0	0	0	0
MIR106A_1	0	0	0	0	0	0	0	0	0	0	0	0	0	0	0	0	0	0	0	0	0	0	0	0	0	0	0	0	0	0	0	0	0	0	0	0	0	0	0	0	0	0
MIR106B	0	0	0	0	0	0	0	0	0	0.050683	0.027345	0	0.020708	0	0.010786	0.002068	0.040713	0	0.017981	0.001768	0.025106	0.008937	0.000621	0	0.019905	0.000235	0	0.010738	0.044173	0.001675	0	0	0.463414	2.11999	1.9672	1.65026	0.384329	0.289537	0.543427	0.00216	0.017475	0.034277
MIR106B_1	0	0	0	0	1.40432	0	0	0	0	0.015148	0.032397	0	0.01311	0	0.010834	0.050005	0.008295	0	0	0.003281	0.035098	0.027774	0.003396	0	0.049787	0.007314	0.002877	0.053889	0.046382	0.010398	0	0	0.386178	2.09049	1.29381	2.00039	0.249616	0.392277	0.543427	0.016398	0.021062	0.048546
MIR107	0	0	0	0	0	0	0	0	0	0	0	0	0	0	0	0	0	0	0	0	0	0	0	0	0	0	0	0	0	0	0	0	0	0	0	0	0	0	0	0.014268	0	0
MIR10A	0	0	0	0	0	0	0	0	0.007359	0	0	0	0	0	0.000138	0	0	0	0	0	0	0	0	0.000204	0	0	0	0	0	0	0	0	0	0	0	0	NA	0	0	0	0	0.000198
MIR10A_1	0	0	0	0	0	0	0	0	0	0	0	0	0	0	0.000148	0	0	0	0	0	0	0	0	0.00023	0	0	0	0	0	0	0	0	0	0	0	0	NA	0	0	0	0	5.2e-05
MIR10B	0	0	0	0	0	0	0	0	0	1.1e-05	0	0.000143	0	5.6e-05	0	0.000341	0	0	0	0	6.2e-05	0	0	0.000755	0	0.000415	0.000429	0.000456	0.000641	0.000205	0	0	1e-06	0	6e-06	0	2e-06	0	0	0	1.6e-05	0
MIR10B_1	0	0	0	0	0	0	0	0	0	0.000274	0.000388	0.000267	0	0.000332	0	0	0	0	0	0	0.000302	0	0	0.00026	0	0.00045	0.000266	0.000846	0.000622	0.000483	0	0	4e-06	0	2e-06	0	0	0	0	0	4.9e-05	0
MIR1185	0	0	0	0	0	0	0	0	0	0	0	0	0	0	0	0.010324	0	0.01719	0.000648	0	0	0	0	0	0	0.036341	0	0	0	0	0.045569	0	0	0	NA	NA	0	NA	NA	0	0.008368	0
MIR1185_1	0	0	0	0	0	0	0	0	0	0	0	0	0	0	0	0.011633	0	0.033173	0.029584	0	0	0	0	0	0	0	0	0	0	0	0	0	0	0	NA	NA	0	NA	NA	0	0.04257	0
MIR1197	0	0	0	0	0	0	0	0	0	0	0	0	0	0	0	0.007107	0	0	0	0.021248	0	0	0.009027	0	0	0.0114	0	0	0	0	0	0	0	0.294955	NA	0	NA	0	NA	0.005814	0	0
MIR122	0	0	0	0	0	0	0	0	0	0	0	0	0	0	0	0	0	0	0	0	0	0	0	0	0	0	0	0	0	0	0	0	0	0	0	0	0	0	0	0	0	0
MIR1224	0	0	1.8993	0	0	0	0	1.16804	0.085662	0	0.012248	0.061347	0.005894	0.016832	0.003664	0.016912	0.030379	0.033482	0.022084	0.028158	0.032704	0.045653	0.047446	0.017804	0.063843	0.042426	0.022641	0.04247	0.025589	0.063735	0	0.594216	NA	2.83894	3.36351	1.55092	1.71705	1.80091	0.913945	0.041548	0.017512	0.035208
MIR1248	11.5774	0	2.10231	10.5741	18.2618	3.79464	1.06939	0	0.158406	0.000616	0.001048	0.00208	0.00278	0.000254	0.000449	0.002981	0.000267	7.1e-05	0.000418	0.001209	9.2e-05	0.001025	3.5e-05	0.000782	0.000817	0.000515	7.2e-05	0.000665	0.003607	0.000339	3.25293	4.6328	4.53759	13.6269	19.4904	15.8358	8.60758	10.7484	15.5746	0.007346	0.020438	0.004473
MIR1249	0	0	0	0	0	0	0	0	0	0.023759	0.053241	0.033131	0.022554	0	0.023114	0.006245	0.028411	0.031319	0.007047	0.028948	0.023213	0.042688	0.028727	0.013711	0.061821	0.038452	0.051354	0.040076	0.056881	0.042112	NA	NA	0.674056	0.9033	1.30001	NA	NA	NA	NA	0.029294	0.00853	0.015133
MIR124A	0	0	0	0	0	0	0	0	0	0	0	0	0	0	0	0	0	0	0	0	0	0	0	0	0	0	0	0	0	0	0	0	0	0	0	0	0	0	0	0	0	0
MIR125B	0	0	0	0	0	0	0	0	0	0	0	0	0	0	0	0	0	0	0	0	0	0	0	0	0	0	0	0	0	0	0	0	0	0	0	0	0	0	0	0	0	0.019244
MIR125B_1	0	0	0	0	0	0	0	0	0	0	0	0	0	0	0	0	0	0	0	0	0	0	0	0	0	0	0	0	0	0	0	0	0	0	0	0	0	0	0	0	0	0.018579
MIR126	0	0	0	0.008807	0	0.061382	0.003982	0.000245	0.000699	0.011842	0.009046	7.6e-05	0.000309	0.02743	0.005477	0.039304	0.066147	0.005355	0.014917	0.005284	0.020359	0.050072	0.030167	0.269693	0.06434	0.055686	0.043451	0.268714	0.034932	0.043393	NA	NA	0.133407	NA	2.87514	1.61782	NA	0	0	0.013852	0.03853	0.003315
MIR126_1	0	0.06811	0	0.229298	0	0	0.123559	0.649702	0.072573	0.025695	0.051449	0.044993	0.035599	0.032895	0.049979	0.053615	0.034188	0.020581	0.016019	0.0387	0.018545	0.033463	0.03541	0.029853	0.058722	0.101155	0.051485	0.07811	0.090696	0.082983	NA	NA	0.077236	0.239651	2.77426	1.60566	NA	0	0	0.02888	0.035784	0.054048
MIR127	0	0	0	0	0	0	0	0	0	0	0	0	0	0	0	4e-06	0	0	0	0	0	0	0	0	0	0	0	0	0	0	0	0	0	NA	NA	0	0	NA	NA	0	0	0
MIR127_1	0	0	0	0	0	0	0	0	0	0	0	0	0	0	0	4e-06	0	0	0	0	3.7e-05	2e-06	0	0	0	0	0	0	0	0	0	0	0	NA	NA	0	8e-06	1.1e-05	0.002201	0	0	0
MIR1271	0	0	0	0	0	0	0	0	0	0	0.023674	0	0	0	0	0	0.031877	0	0.011656	0	0	0	0.022406	0	0	0.018854	0	0.034303	0	0.022657	0	0	0	NA	0	0	NA	NA	0	0.011498	0.030749	0
MIR1271_1	0	0	0	0	0	0	0	0	0	0	0.022145	0	0	0.068725	0	0	0	0	0.001946	0	0	0.028446	0.010043	0	0	0.006946	0	0	0	0	0	0	0	0.761353	0	0	NA	NA	0	0.004264	0.01041	0
MIR128	0	0	0	0	0	0	0	0	0	0	0	0	0	0	0	0	0	0	0	0	0	0	0	0	0	0	0	0	0	0	NA	0	0	0.667656	0	NA	0	NA	NA	0.009999	0	0.038377
MIR128_1	0	0	0	0	0	0	0	0	0	0	0	0	0	0	0	0	0	0	0	0	0	0	0	0	0	0	0	0	0	0	NA	0	0	0.645214	0	0.395043	0	NA	NA	0.015819	0.026336	0.011852
MIR129	0	0	0	0	0	0	0	0	0	0	0	0	0	0	0	0	0	0	0	0	0	0	0	0	0	0	0	0	0	0	0	0	0	0	0	0	0	0	0	0	0	0
MIR129_1	0	0	0	0	0	0	0	0	0	0	0	0	0	0	0	0	0	0	0	0	0	0	0	0	0	0	0	0	0	0	0	0	0	0	0	0	0	0	0	0	0	0
MIR1291	0	0	0.067908	0	0	0	0	0	0	0.003862	0.006811	0.008343	0.010759	0.003485	0.004557	0.011095	0.004178	0.003632	0.003441	0.002965	0.004634	0.002951	0.002406	0.009521	0.00705	0.008272	0.006069	0.011703	0.006269	0.008413	0.004327	0.004114	0.004836	0.005061	0.008435	0.006485	0.003882	0.016762	0.005276	0.026134	0.029854	0.032418
MIR1296	0	0	0	0	0	0	0	0	0	0	0.014078	0	0	0	0	0	0	0	0	0	0	0	0	0	0	0	0	0	0	0	0.560849	0.799238	0	2.45768	5.61272	2.9133	3.52866	1.46212	1.87237	0.034103	0.031167	0.052053
MIR1306	0.002347	0.000568	0.001064	0.031233	0.000577	0.007096	0.000595	0.008004	0.016407	0.000806	0.012129	0.006147	0.000191	0.00068	0.000714	0.00023	0.000828	0.00075	0.000188	0.000775	0.000657	0.000191	0.000541	0.000911	0.00177	0.004844	0.000434	0.001157	0.000925	0.001396	NA	NA	NA	0.000156	0.000163	NA	0.0001	9.1e-05	0.000143	0.001323	0.012289	0.01373
MIR1306_1	0.019808	0.069073	0.04573	0.423917	0.043724	0.154953	0.109947	0.007234	0.048878	0.000806	0.0009	0.000705	0.000865	0.000841	0.000855	0.000664	0.000914	0.000821	0.000583	0.000879	0.000772	0.000625	0.000676	0.000917	0.001143	0.001253	0.001542	0.001247	0.001607	0.001676	NA	NA	NA	0.000172	0.0002	NA	0.000115	9.6e-05	0.000162	0.001528	0.001674	0.001391
MIR1307	0	0	0	0	0	0	0	0	0	0	0.016682	0.003708	0.004304	0.001396	0.015501	0.008549	0	0.005134	0.00623	0.000388	0	0.004677	0.019117	0.003628	0.03948	0.093363	0.050567	0.019839	0.022592	0.034915	0	0.535142	0	0.235313	1.21059	1.13341	0.249616	0.294207	0.217371	0.015215	0.02974	0.020958
MIR1307_1	0	0	0	0	0	0	0	0	0	0	0.008335	0.013508	0	0.007037	0.014798	0.009942	0	0.020459	0.00832	0.005433	0.005707	0.031703	0.002534	0.021045	0.046085	0.055545	0.032188	0.008902	0.03044	0.039759	0	0.535142	0	0	1.21059	0.994811	0.159175	0.294207	0.108685	0.006825	0.014575	0.029646
MIR130A	0	0	0	0	0	0	0	0	0	0	0	0	0.020853	0	0	0	0	0	0	0	0	0	0	0	0	0.014533	0	0	0.046994	0.04754	0	0	0	NA	NA	NA	0	0	0	0	0	0
MIR130A_1	0	0	0	0	0	0	0	0	0	0	0	0	0.019837	0	0	0	0	0	0	0	0	0	0	0	0	0.051958	0	0	0.005366	0.017453	0	0	0	0.727332	NA	0.784584	0	0	0	0	0	0
MIR130B	0	0	0	0	0	0	0	0	0	0	0	0	0	0	0	0	0.010709	0	0.05513	0	0	0	0.014815	0	0	0	0	0	0	0.014386	0	0	0	0	NA	0	NA	NA	NA	0	0	0
MIR130B_1	0	0	0	0	0	0	0	0	0	0	0	0	0	0	0	0	0.015438	0	0	0	0	0	0.012749	0	0	0.045939	0	0	0	0.016269	0	0	0	NA	NA	0	NA	0	NA	0	0	0
MIR133A	0	0	0	0	0	0	0	0	0	0	0	0	0	0	0	0	0	0	0	0	0	0	0	0	0	0	0	0	0	0	0	0	0	0	0	0	0	0	0	0	0	0
MIR133A_1	0	0	0	0	0	0	0	0	0	0	0	0	0	0	0	0	0	0	0	0	0	0	0	0	0	0	0	0	0	0	0	0	0	0	0	0	0	0	0	0	0	0
MIR133B	0	0	0	0	0	0	0	0	0	0	0	0	0	0	0	0	0	0	0	0	0	0	0	0	0	0	0	0	0	0	0	0	0	0	0	0	0	0	0	0	0	0
MIR134	0	0	0	0	0	0	0	0	0	0	0.034405	0	0	0.011044	0	0	0.017537	0	0.013225	0	0	0.015075	0.009348	0.010067	0.033946	0.002047	0.023483	0	0	0	0	0	0	0.522037	0	NA	0.854744	1.96138	1.44749	0.004073	0.00932	0.033445
MIR1343	0	0	0	0	0	0	0	0	0	0	0	0	0	0	0	0	0	0	0.010398	0	0	0	0	0	0.065748	0	0	0	0.019742	0.018942	0	0	NA	NA	NA	1.56917	0	NA	NA	0.030968	0.014108	0.083296
MIR135A	0	0	0	0	0	0	0	0	0	0	0	0	0.040565	0	0	0	0.010386	0	0	0.002788	0	0	0	0	0	0.023934	0.023858	0.00991	0	0.037719	0	NA	0.006716	NA	0	0	0	0	0	0.019773	0	0
MIR135B	0	0	0	0	0	0	0	0	0	0	0	0	0	0	0	0	0	0	0	0	0	0	0	0	0	0	0	0	0	0	0	0	0	0	0	0	0	0	0	0	0	0
MIR135B_1	0	0	0	0	0	0	0	0	0	0	0	0	0	0	0	0	0	0	0	0	0	0	0	0	0	0	0	0	0	0	0	0	0	0	0	0	0	0	0	0	0	0
MIR136	0	0	0	0	0	0	0	0	0	0	0	0	0	0	0	0	0	0	0	0	0	0	0	0	0	0	0	0	0	0	0	0	0	0	0	0	0	0	0	0	0	0
MIR136_1	0	0	0	0	0	0	0	0	0	0	0	0	0	0	0	0	0	0	0	0	0	0	0	0	0	0	0	0	0	0	0	0	0	0	0	0	0	0	0	0	0	0
MIR137	0	0	0	0	0	0	0	0	0	0	0	0	0	0	0	0	0	0	0	0	0	0	0	0	0	0	0	0	0	0	0	0	0	0	NA	0	0	0	0	0	0	0
MIR1388	0	0	0	0	0	0	0	0	0	0.002258	0.029798	0.0359	0.014592	0	0.000917	0.003004	0.001658	0.010254	0.005822	0.040307	0.025304	0.017319	0.028935	0.030628	0.04476	0.020596	0.017067	0.08771	0.00975	0.074097	NA	0.68804	0.709832	4.08021	3.02647	3.34512	1.91768	2.41437	2.98108	0.036046	0.01148	0.014129
MIR1388_1	0	0	0	0	0	0	0	0	0	0.024669	0.038253	0.011461	0.008278	0.022644	0.007164	0	0.02161	0.015283	0.012607	0.030807	0.034932	0.006223	0.024753	0.027874	0.049962	0.04326	0.060114	0.057054	0.054931	0.071678	NA	0.635915	0.849592	3.37858	2.72382	3.77695	2.0234	2.52751	3.73482	0.052499	0.031461	0.060437
MIR140	0	0	0	0	0	0	0	0	0	0	0	0	0	0	0.016933	0.002869	0	0.018485	0.000608	0.011808	0.001463	0	0.020944	0.009609	0.047791	0.014758	0	0.014627	0	0.006475	NA	0.708889	NA	0.516171	1.66456	1.44145	NA	0.793468	0.760797	0.03858	0.005057	0.033692
MIR140_1	0	0.523342	0	0	0	0	0	0	0	0	0	0.052496	0	0.008912	0.029228	0.023772	0	0	0.022313	0.006346	0.0137	0.016824	0.013887	0.017495	0.035626	0.031184	0	0.014366	4.5e-05	0.04593	NA	0.837462	NA	0.516171	1.89842	1.47185	0.518142	0.624076	0.671873	0.01819	0.034394	0.015628
MIR141	0	0	0	0	0	0	0	0	0	0	0	0	0	0	0	0	0	0	0	0	0	0	0	0	0	0	0	0	0	0	0	NA	NA	0	0	NA	NA	NA	0	0	0	0
MIR143	0	0	0	0	0.005764	0.005844	0.001445	0.003161	0.000747	9.9e-05	4.6e-05	4.2e-05	1.8e-05	4.7e-05	0.000147	8.4e-05	5.4e-05	5.1e-05	5.3e-05	1.6e-05	9.4e-05	5e-05	4.4e-05	3.2e-05	8e-05	8.8e-05	6.7e-05	0.000104	0.000201	0.000133	8e-06	4e-06	2e-06	2e-06	2.5e-05	3.1e-05	7e-06	1.3e-05	8e-06	3.2e-05	3.3e-05	1e-05
MIR143_1	0	0	0	0	0	0	0	0	0	0.000182	8e-05	0.000119	0.00012	5.6e-05	0.000155	0.000159	0.000168	0.000117	0.000116	6.2e-05	0.000151	0.000109	0.000154	0.000105	0.000222	0.000206	0.000122	0.000179	0.000359	0.000362	2e-06	3e-06	2e-06	3e-06	1.8e-05	1.9e-05	6e-06	8e-06	6e-06	0.000116	0.000102	5.8e-05
MIR144	0	0	0	0	0	0	0	0	0	0	0	0	0	0	0	0	0	0	0	0	0	0	0	0	0.053499	0	0	0	0	0	0	0	0	0	0	0	0	0	0	0	0	0
MIR144_1	0	0	0	0	0	0	0	0	0	0	0	0	0	0	0	0	0	0	0	0	0	0	0	0	0.00127	0	0	0	0	0	0	0	0	0	0	0	0	0	0	0	0	0
MIR145	0	6.7e-05	1.3e-05	0.21695	0.025756	0.009195	0.001906	0.010224	0.000124	4.8e-05	7.3e-05	5e-05	3.5e-05	4.2e-05	7.1e-05	5.7e-05	6.4e-05	5.2e-05	5.7e-05	6.4e-05	5.2e-05	7.6e-05	3.6e-05	4e-05	0.000109	0.000118	0.00011	9.8e-05	0.0001	9.4e-05	2.5e-05	7e-06	1.5e-05	2.3e-05	3.3e-05	3.3e-05	1e-05	2.2e-05	1.4e-05	2.6e-05	2.7e-05	3.1e-05
MIR145_1	0	0	0	0	0	0.010766	0.00581	0	0.001126	0.000216	0.000293	0.000188	0.000277	0.000128	0.00033	0.000312	0.000245	0.000191	0.000162	0.0003	0.000174	0.000187	0.000209	0.000138	0.000436	0.000377	0.000278	0.000312	0.000281	0.001319	1.9e-05	6e-06	1e-05	1.1e-05	2.9e-05	2e-05	9e-06	1.4e-05	8e-06	6.3e-05	9.1e-05	7.2e-05
MIR1468	0	0	0	0	0	0	0	0	0	0	0	0	0	0	0	0	0	0	0	0.006657	0.024306	0	0	0	0.031751	0	0.02486	0	0	0	0	0	0	0	0	NA	0	0	NA	0.01141	0.010884	0.050722
MIR1468_1	0	0	0	0	0	0	0	0	0	0	0	0	0	0	0	0	0	0	0	0.01591	0.00897	0	0	0	0.023138	0	0	0	0	0	0	0	0	0	0	NA	0.022692	0	NA	0.020889	0.032669	0.05042
MIR146A	0	0	0	0	0	0	0	0	0	0	0	0	0	0	0	0	0	0	0	0	0	0	0	0	0	0	0.042136	0.015072	0	0	0	0	0	0	0	NA	NA	0	0	0.014458	0	0
MIR146B	0	0	0	0	0	0	0	0	0	0	0	0	0	0.004038	0	0.004541	0	0.016674	0.00309	0	0	0	0	0.016217	0	0.003171	0.012632	0	0	0	NA	0	0	0	0	0	0	0	0	0.004318	0	0
MIR146B_1	0	0	0	0	0	0	0	4.54106	0	0	0.026612	0	0	0.021899	0	0.000678	0	0	0.0031	0	0	0	0	0.000168	0	0.002884	0.021342	0.024893	0	0	NA	0	0	0	0	0	0	0	0	0.018903	0	0
MIR147	0	0	0	0.048824	0.057442	0.068846	0.019152	0.16281	0	0.003372	0.001592	0.002539	0.000649	0.001286	0.00257	0.000372	0.001726	0.000506	0.001203	0.001702	0.001774	0.000727	0.001833	0.003212	0.00355	0.003934	0.003041	0.003728	0.002574	0.003365	0.000949	0.000418	0.000477	0.000722	0.010412	0.000799	0.000353	0.001006	0.000578	0.003524	0.001347	0.003821
MIR147_1	0	0	0	0.008931	0.074413	0.101772	0.014426	0.148063	0	0.00456	0.005442	0.004359	0.003477	0.004777	0.008751	0.000661	0.004098	0.003028	0.005873	0.002885	0.002905	0.001982	0.00472	0.006902	0.042151	0.006956	0.008562	0.008886	0.006192	0.008403	0.000278	0.00026	0.000341	0.000599	0.000532	0.000673	0.00039	0.000457	0.000596	0.004743	0.001169	0.009927
MIR148A	0	0	0	0	0	0	0	0	0	0	0	0.007828	0.015027	0.029864	0.004393	0.014215	0.037926	0	0.01238	0.010466	0	0.005652	0.010142	0.018845	0.018816	0.024307	0.027266	0	0.011233	0.044153	0	0	0	0	0	0	0	0	0	0.025857	0.025923	0
MIR148A_1	0	0	0	0	0	0	0	0	0	0	0	0.019864	0.001215	0.015525	0	0.008047	0.033382	0	0	0.001023	0	0.014644	0.019008	0.003739	0.060326	0	0.001609	0	0.010329	0.001588	0	0	0	0	0	0	0	0	0.103745	0.017201	0.016498	0
MIR148B	0	0	0	0	0	0	0	0	0	0	0.058248	0.03427	0.035942	0	0	0.004439	0	0	0	0.021818	0.007705	0	0	0	0	0.009435	0.014755	0	0	0.019778	NA	0	0	NA	1.27249	NA	1.09301	0.48143	0.666933	0.022968	0.003199	0.005069
MIR148B_1	0	0	0	0	0	0	0	0	0	0	0	0	0	0	0	0.012864	0	0	0	0.0012	0.016853	0	0	0	0	0.060664	0.005322	0	0	0.034058	NA	0	0	NA	1.51323	NA	1.03102	0.882622	0.760797	0.046217	0.046093	0.042039
MIR150	0	0	0	0	0	0	0	0	0	0	0	0	0.012536	0.001901	0	0	0.006697	0	0	0	0.011287	0	0	0.017289	0.000757	0	0.002803	0.006771	0	0.001727	0.002537	NA	0	NA	NA	NA	NA	NA	NA	0.00142	0.007431	0
MIR151	0	0	0	0	0	0	0	0	0	0.034576	0	0	0.010695	0.00346	0	0	0	0	0	0.000326	0	0	0	0	0.00334	0.016209	0.011346	0	0.00818	0.03378	0	NA	NA	0	NA	NA	NA	0	NA	0.025811	0.014807	0.010806
MIR151_1	0	0	0	1.44765	0	0	0	0	0	0	0	0.007722	0.024297	0.020642	0	0	0	0.021724	0	0.021797	0	0	0	0	0.015066	0.040173	0.022495	0.013611	0.030653	0.032749	0	NA	NA	0	0.317058	0.439645	NA	0	NA	0.031155	0.002327	0.01902
MIR153	0	0	0	0	0	0	0	0	0	0	0	0	0.007648	0	0.015516	0	0.009031	0	0	0	0	0	0	0	0	0	0.005763	0	0	0.016615	0	0	0	0	NA	0	0	0	0	0	0	0
MIR154A	0	0	0	0	0	0	0	0	0	0	0	0.036039	0.002248	0	0	0.012495	0	0	0	0	0	0	0	0	0	0	0.038751	0	0	0.082691	0	0	0	0.94405	1.13891	0.014085	1.24808	2.04397	0.898084	0	0.004162	0
MIR154A_1	0	0	0	0	0	0	0	0	0	0	0	0	0	0	0	0.017914	0	0	0	0	0	0	0	0	0	0	0.029152	0	0	0	NA	0	NA	1.41947	1.10053	0.133805	1.11949	2.50076	1.35363	0	0.023017	0
MIR154B	0	0	0	0	0	0	0	0	0	0	0	0	0	0	0	0	0	0	0	0	0	0	0	0.014641	0	0	0	0	0	0	0	0	NA	NA	NA	0	0	0.098069	0	0	0.006767	0
MIR154B_1	0	0	0	0	0	0	0	0	0	0	0	0	0	0.011798	0	0	0	0	0	0	0	0	0	0.038733	0	0	0	0	0.035028	0	0	0	0	NA	NA	0	0	0.098069	0	0	0.009758	0.028904
MIR155	0	0	0	0	0	0	0	0	0	0	0.019818	0	0	0	0	0.002019	0	0.008991	0	0	0	0	0	0	0.055698	0	0	0	0	0.017283	0	NA	0	0	NA	NA	0	0	0	0	0.01489	0
MIR155_1	0	0	0	0	0	0	0	0	0	0	0.020645	0	0	0	0	0.005821	0	0.009995	0	0	0	0.025326	0	0	0.002975	0	0	0.038901	0.018244	0.028099	0	NA	0	0	NA	0.162893	0	0	0	0	0.022628	0
MIR15A	0	0	0	0	0	0	0	0	0	0	0	0	0	0	2.6e-05	0	0	0	0	0	2.9e-05	0	0	0	0	0.000524	0	0	0	0	2.9e-05	NA	4e-06	2.1e-05	5.3e-05	2.3e-05	3.2e-05	3.2e-05	3.2e-05	0.000447	2.1e-05	0.00181
MIR15A_1	0	0	0	0	0	0	0	0	0	5.4e-05	4e-05	0	0	0	0	0	0	0	0	0	0	0	0	0	0	0.000284	0	0	0	0	2.2e-05	NA	2e-06	1.8e-05	4.2e-05	1.2e-05	4.6e-05	3.4e-05	4e-05	0.000214	5.7e-05	0.000835
MIR15B	0	0	0	0	0	0	0	0	0	0	0	0	0	0	0	0	0	0	0	0	0	0	0	0	0	0	0	0	0	0	NA	0	NA	0	NA	NA	NA	NA	5e-06	3.3e-05	1.8e-05	6.3e-05
MIR15B_1	0	0	0	0	0	0	0	0	0	0	0	0	0	0	0	0	0	0	0	0	0	0	0	0	0	0	0	0	0	0	NA	NA	NA	0	NA	NA	NA	NA	8e-06	3.8e-05	6.5e-05	9.1e-05
MIR16A	0	0	0	0	0	0	0	0	0	2.7e-05	1.7e-05	0	0	0	0	0	0	0	0	0	0	0	0	0	0	0	0	0	0	0	0	NA	1e-06	1e-06	7e-06	5e-06	1e-05	2e-06	5e-06	0	0	1e-06
MIR16A_1	0	0	0	0	0	0	0	0	0.001173	0	5.1e-05	0	0	0	0	0	0	0	0	0	5.4e-05	0	0	0	0	0	0	0	0	0	0	NA	1e-06	3e-06	1e-05	6e-06	1e-06	3e-06	5e-06	0	0	1e-05
MIR16B	0	0	0	0	0	0	0	0	0	0	0	0	0	0	0	0	0	0	0	0	0	0	0	0	0	0	0	0	0	0	NA	0	0	0	NA	NA	NA	0	0	0	0	5e-06
MIR16B_1	0	0	0	0	0	0	0	0	0	0	0	0	0	0	0	0	0	0	0	0	0	0	0	0	0	0	0	0	0	0	NA	0	NA	0	NA	NA	0	0	0	0	1.9e-05	1.8e-05
MIR17	0	0	0	0	0	0	0	0	0	0	6e-05	0	3.4e-05	0	0	0	0	0	0	0	0	0	0	0	0	1.9e-05	0	0	5.2e-05	1.7e-05	8e-05	0.000227	4.6e-05	1.2e-05	8e-05	2.4e-05	1.1e-05	3e-06	1.5e-05	2.4e-05	6e-05	9.1e-05
MIR17_1	0	0	0	0	0	0	0	0	0	0	0.000156	0	9.3e-05	0	0	0	0	0	0	0	0	0	0	0	0	1.9e-05	0	0	8.7e-05	4e-06	6.1e-05	0.000202	4.6e-05	1.5e-05	7e-05	2.1e-05	1.1e-05	4e-06	1.3e-05	6e-06	0.000159	0.000122
MIR1814	0	0	0	0	0	0	0	0	0	0	0	0	0	0	0	0	0	0	0	0.024552	0	0	0	0	0	0	0	0	0	0	0	0	0	0	0	0	0	0	0	0	0	0
MIR181B	0	0	0	0	0	0	0	0	0	0.080089	0.051328	0.008174	0	0	0	0.008376	0.008186	0	0	0	0	0	0.015149	0.005612	0	0.015954	0.005194	0.077975	0.044518	0	0	NA	0	1.52046	1.46718	NA	1.1902	1.51368	1.21917	0.209133	0.017475	0.005014
MIR181B_1	0	0	0	0	0	0	0	0	0	0	0	0.028555	0	0.067773	0	0.028688	0.031216	0.007282	0.009061	0	0.021278	0	0	0.012102	0	0.001951	0.026566	0.001248	0.040821	0	0	0	0	1.8066	0.756617	NA	1.24808	1.42434	1.19554	0.045909	0.035979	0.044587
MIR181C	0	0	0	0	0	0	0	0	0	0	0	0	0	0	0	0	0	0	0	0	0	0	0	0	0	0.066567	0	0	0	0	0	0	0	0	0	0	0	0	0	0	0	0
MIR181C_1	0	0	0	0	0	0	0	0	0	0	0	0	0	0	0	0	0	0	0	0	0	0	0	0	0	0.035627	0	0	0	0	0	0	0	0	0	0	0	0	0	0	0	0
MIR181D	0	0	0	0	0	0	0	0	0	0	0	0	0	0	0	0	0	0	0	0.019953	0	0	0.010347	0	0	0.097789	0	0	0	0	0	0	0	0	0	0	0	0	0	0	0	0
MIR182	0	0	0	0	0	0	0	0	0	0	0	0	0	0	0	0	0	0	0	0	0	0	0	0	0	0	0	0	0	0	0	0	0	0	0	NA	0	0	0	0	0	0
MIR183	0	0	0	0	0	0	0	0	0	0	0	0	0	0	0	0	0	0	0	0	0	0	0	0	0	0	0	0	0	0	0	0	0	0	0	0	0	0	0	0	0	0
MIR1839	0	0	0	0	0	0	0	0	0	0.036698	0.032362	0.011796	0.028653	0.022362	0.037391	0.068705	0.013125	0.013238	0.039283	0.046516	0	0.005386	0.014128	4.8e-05	0.013813	0.06696	0	0.020803	0.017071	0.02218	NA	NA	NA	1.10859	0	NA	0.892657	0.695399	NA	0.037945	0.046694	0.072223
MIR184	0	0	0	0	0	0	0	0	0	0	0	0	0	0	0	0	0	0	0	0	0	0	0	0	0	0	0	0	0	0	0	0	0	0	0	0	0	0	0	0	0	0
MIR186	0	0.002418	0	0	0	0	0	0	0	1e-06	1.7e-05	5e-06	9e-06	1.6e-05	5e-06	3e-06	1e-06	7e-06	0	1e-06	3e-06	2e-06	0	3.2e-05	0	1e-06	1e-06	1.7e-05	1e-06	2e-06	1.7e-05	1.1e-05	4.2e-05	9.8e-05	6.2e-05	9.5e-05	2.2e-05	4.6e-05	4.2e-05	7e-05	9.2e-05	6.3e-05
MIR186_1	0	0.019168	0	0	0	0	0	0	0	0	0.000159	6e-06	1.6e-05	9e-06	2.9e-05	1.3e-05	2e-06	6.9e-05	5e-06	1.3e-05	2e-06	4.8e-05	0	5e-06	0	1.2e-05	9e-06	6.6e-05	1.9e-05	4e-06	1.8e-05	7e-06	2.3e-05	0.000109	6e-05	0.000112	1.9e-05	4.1e-05	3.4e-05	0.000244	0.000397	0.000164
MIR187	0	0	0	0	0	0	0	0	0	0	0.032834	0	0	0	0	0	0	0	0	0	0	0	0	0.030353	0	0.033709	0	0.058163	0.02657	0.027545	0	NA	0	0	NA	NA	0	0	0	0	0	0.004126
MIR188	0	0	0	0	0	0	0	0	0	0	0	0	0	0	0	0	0	0	0	0	0	0	0	0	0	0	0	0	0	0	0	0	0	0	0	NA	0	0	0	0	0	0.025182
MIR188_1	0	0	0	0	0	0	0	0	0	0	0	0	0	0	0	0	0	0	0	0	0	0	0	0	0	0	0	0	0	0.119444	0	0	0	0	0	NA	0	0	0	0	0	0.025182
MIR18A	0	0	0	0	0	0	0	0	0	0	0	0	0	0	0	0	0	0	0	0	0	0	0	0	0	1.1e-05	0	0	0	2.3e-05	0.000102	0.000439	0.000134	7.6e-05	0.000197	0.000227	3.9e-05	0.000204	9.7e-05	0.0001	2e-05	3.2e-05
MIR18A_1	0	0	0	0	0	0	0	0	0	0	0	0	0	0	0	0	0	0	0	0	0	0	0	0	0	0	0	0	0	2.7e-05	8.7e-05	0.000294	0.000104	5.8e-05	0.000142	0.000143	2.9e-05	0.000142	8.2e-05	0.000126	9.7e-05	0.00013
MIR18B	0	0	0	0	0	0	0	0	0	0	0	0	0	0	0	0	0	0	0	0	0	0	0	0	0	0	0	0	0	0	0	0	0	0	0	0	0	0	0	0	0	0
MIR18B_1	0	0	0	0	0	0	0	0	0	0	0	0	0	0	0	0	0	0	0	0	0	0	0	0	0	0	0	0	0	0	0	0	0	0	0	0	0	0	0	0	0	0
MIR190A	0	0	0	0	0	0	0	0	0	0	0	0	0	0.010885	0	0	0.004251	0	0	0.004808	0	0	0	0.00116	0	0	0	0	0.00381	0.090666	0	0	0	NA	0	0	0	0	0.869483	0.031841	0	0
MIR190A_1	0	0	0	0	0	0	0	0	0	0	0	0	0	0.003976	0	0	0.013644	0	0.016955	0.008008	0	0	0	0	0	0	0	0	0.011716	0	0	0.010921	0	NA	0	0	0	0	0.869483	0.038589	0	0
MIR190B	0	0	0	0	0	0	0	0	0	0	0	0	0	0	0	0	0	0	0	0	0	0	0	0	0	0	0	0	0	0	0	0	0	0	0	0	0	0	0	0	0	0
MIR191	0	0	0	0	0	0	0	0	0	4.3e-05	4.9e-05	4.5e-05	3.1e-05	2.1e-05	5.3e-05	0.000626	2.1e-05	0.000139	4e-06	1.1e-05	1.6e-05	1.9e-05	3.8e-05	1.1e-05	3e-05	0.000168	1.3e-05	2e-05	1.4e-05	4.2e-05	1.1e-05	NA	4.5e-05	2.6e-05	4e-05	1.6e-05	8e-06	2e-06	1.8e-05	9e-05	7.6e-05	4.7e-05
MIR191_1	0.00817	0.000124	0	0	0	0	0	0	0	0.000219	0.000317	0.000399	0.000198	0.000156	0.000319	0.001574	0.000119	0.000378	5.7e-05	8.3e-05	0.00017	0.000138	0.00023	8.7e-05	0.000189	0.000255	0.000154	0.000117	7.1e-05	0.000124	1.9e-05	NA	6e-05	3.7e-05	5.1e-05	1.8e-05	1.2e-05	4e-06	2.1e-05	0.000346	0.000366	0.000493
MIR192	0	0	0	0	0	0	0	0	0	0.026345	0.028086	0	0.011	0.038859	0	0	0	0.016303	0.022447	0.022027	0	0	0.036704	0	0.019721	0	0	0.020701	0.019113	0	0	0	0	0	NA	0	0	0	0	0.017017	0	0
MIR192_1	0	0	0	0	0	0	0	0	0	0.018143	0.023952	0	0.013609	0	0	0	0	0.00117	0.009595	0	0	0	0	0	0.016452	0	0	0	0.037726	0	0	0	0	0	NA	0	0	0	0	0.022445	0	0
MIR193A	0	0	0	0	0	0	0	0	0	0	0	0	0	0	0	0	0	0	0	0	0	0	0	0	0	0	0	0	0	0	0	0	0	0	0	NA	0	0	0	0	0	0
MIR194	0	0	0	0	0	0	0	0	0	0.021798	0.030491	0.031368	0	0.012013	0.016257	0	0.028005	0	0	0.017076	0.039013	0	0	0.021737	0	0.041367	0	0.051181	0	0.03342	NA	NA	NA	5.39047	4.25769	2.64569	1.05897	1.13225	1.46725	0.017634	0.051882	0.059494
MIR195	0	0	0	0	0	0	0	0	0	0	0	0	0	0	0	0	0	0	0	0	0	0	0	0	0	0	0	0	0	0	0	0	0	0	0	0	0	0	0	0	0	0
MIR195_1	0	0	0	0	0	0	0	0	0	0	0	0	0	0	0	0	0	0	0	0	0	0	0	0	0	0	0	0	0	0	0	0	0	0	0	0	0	0	0	0	0	0
MIR196A	0	0	0	0	0	0	0	0	0	0.036259	0.014628	0	0.019753	0	0.016453	0.010806	0	0	0.012291	0	0.009708	0	0.000488	0	0.026226	0.048109	0.012358	0	0	0.014472	0	0	0	0	0	NA	NA	0	NA	0.019279	0	0
MIR196B	0	0	0	1.54916	0	0	0.042414	1.29291	0	0.024876	0.034614	0.074113	0.036067	0.017548	0.035003	0.023956	0.030282	0.040136	0.013539	0.038388	0.043753	0.03772	0.036456	0.036846	0.052453	0.082764	0.062449	0.052588	0.056762	0.073086	NA	1.36516	NA	4.4612	3.97764	2.18548	NA	0	0.972993	0.030701	0.014516	0.038848
MIR197	0	0	0.001432	3.7e-05	0.000547	0	0	0.00111	0	3.6e-05	2.6e-05	0.000383	8.9e-05	2.8e-05	1.8e-05	1.6e-05	6.2e-05	4e-06	1e-06	1e-06	4e-06	3.6e-05	7e-06	2e-06	0.001294	0.00084	2.3e-05	2.1e-05	0.000126	4.3e-05	1.2e-05	3e-05	2.3e-05	4.8e-05	3.1e-05	2.7e-05	1.4e-05	2.1e-05	2.1e-05	3.6e-05	0.000245	0.000343
MIR197_1	0	0.002569	0	0	0	0	0	0.012438	0	2.8e-05	1.9e-05	4.1e-05	6.1e-05	3.2e-05	2e-05	5e-06	2.7e-05	9e-06	3.6e-05	1e-05	3.7e-05	3.5e-05	1e-05	6.8e-05	0.000154	0.000212	5e-05	2.7e-05	6.3e-05	2.4e-05	1e-05	3.5e-05	2e-05	3.9e-05	2.8e-05	2.5e-05	1.2e-05	2e-05	2e-05	7.8e-05	0.000108	0.000303
MIR199A	0	0	0	0	0	0	0	0	0	0.000172	0	0	5.5e-05	0	0	0	0	0.000248	0	6.2e-05	4.3e-05	0.00027	9e-06	3.5e-05	2.4e-05	6.3e-05	3e-06	4.7e-05	2.9e-05	2.6e-05	2e-05	NA	NA	9.3e-05	0.000347	0.000151	0	9e-06	6.7e-05	1.9e-05	0.000117	0.000192
MIR199A_1	0	0	0	0	0	0	0	0	0	0.000455	0	0	0.000476	0	0	0	0.000321	5.1e-05	0	0.000571	0	0.000803	0.000265	0.000588	0.000304	0.000328	4.1e-05	0.000328	6.4e-05	1e-06	9.1e-05	NA	NA	0.000128	0.000403	0.000175	7e-06	9e-06	3.4e-05	0.000133	0.000439	0.000502
MIR199B	0	0	0	0	0	0	0	0	0	0	0.019607	0	0	0	0	0.011796	0.013004	0	0.002508	0	0	0.002549	0.000335	0.032819	0	0.011538	0.034575	0	0	0	NA	0	0	0	NA	NA	0	0	0	0.016591	0	0.019247
MIR199B_1	0	0	0.881047	0	0	0	0	0	0	0	0	0	0	0	0	0.013793	0.041093	0	0.017296	0	0	0.020353	0.033987	0.036906	0	0.016183	0.02865	0	0	0	0.006096	0	0	0	NA	NA	0	0	0	0.023197	0	0.021541
MIR19A	0	0	0	0	0	0	0	0	0	0	2.5e-05	0	0.000173	0	0	2e-06	4.7e-05	0	0	0	0	0	0	0	0	0	0	0	0	0	0.000135	0.000532	0.000146	8.1e-05	0.000262	0.000308	0.000128	0.000333	0.000128	0.002038	0.000629	0.000744
MIR19B	0	0	0	0	0	0	0	0	0	0	7e-06	0	0	0	0	0	1.2e-05	0	0	3.3e-05	0	3e-06	4.8e-05	1.7e-05	6.6e-05	9.4e-05	0.000116	0	3.8e-05	0	0	3.5e-05	0	5e-06	1.8e-05	1.4e-05	NA	0	0	1.8e-05	4.7e-05	0
MIR19B_1	0	0	0	0	0	0	0	0	0	0	2e-06	0	0	0	0	0	0	0	4.5e-05	8e-05	0	4.1e-05	2e-06	0.000143	0	0.000492	0	2.7e-05	0.000153	1.4e-05	0	3.5e-05	0	5e-06	1e-05	0	NA	0	0	8.9e-05	0	0
MIR200A	0	0	0	0	0	0	0	0	0	0.025676	0.023847	0.008961	0.01671	0.018428	0.016936	0	0	0	0	0	0.019067	0.011647	0.012685	0	0	0	0	0.00578	0.007419	0.008864	0	0.382244	NA	0.129043	1.95279	1.38902	NA	0.840593	0.750446	0.003204	0.010593	0.00285
MIR200B	0	0	0	0	0	0	0	0	0	0	0.005381	0	0	0	0	0	0.02382	0	0.006329	0.009322	0	0.020723	0.012029	0	0.035446	0.01872	0.00384	0	0	0.007112	0	NA	0.407242	0.539634	3.10213	3.67356	NA	NA	0.227251	0.005678	0.070489	0.028865
MIR200C	0	0	0	0	0	0	0	0	0	0	0	0	0	0	0	0	0	0	0	0	0	0.023503	0	0	0	0	0	0	0	0	0	NA	NA	0	0	NA	NA	0.196138	0.250449	0.180441	0	0
MIR202	0	0	0	0	0	0	0	0	0	0	0	0	0.019031	0	0	0	0	0	0	0.030061	0	0	0	0	0	0	0	0	0	0	0	0	0	0	NA	0	0	0	0	0	0	0
MIR202_1	0	0	0	0	0	0	0	0	0	0	0	0	0.017806	0	0	0	0	0	0.017871	0.012758	0	0	0	0	0	0	0	0	0	0	0	0	0	0	NA	0	0	0	0	0	0	0.032069
MIR204	0	0	0	0	0	0	0	0	0	0	0	0	0	0	0	0	0	0	0	0	0	0	0	0	0	0	0	0	0	0	0	0	0	0	0	0	0	0	0	0	0	0
MIR204_1	0	0	0	0	0	0	0	0	0	0	0	0	0	0	0	0	0	0	0	0	0	0	0	0	0	0	0	0	0	0	0	0	0	0	0	0	0	0	0	0	0	0
MIR206	0	0	0	0	0	0	0	0	0	0	0	0	0	0	0	0	0	0	0	0	0	0	0	0	0	0	0	0	0	0	0	0	0	0	0	0	0	0	0	0	0	0
MIR208B	0	0	0	0	0	0	0	0	0	0	0	0	0	0	0	0	0	0	0	0	0	0	0	0	0	0	0	0	0	0	0	0	0	0	0	0	0	0	0	0	0	0
MIR20A	0	0	0	0	0	0	0	0	0	0	0	0	0	0	0	0	0	0	9e-06	0	0	0	0	0	0	0	0.000216	3e-06	0	0	0	0	8e-06	1e-06	2.4e-05	1.8e-05	5e-06	1e-05	6e-06	0	0	0
MIR20A_1	0	0	0	0	0	0	0	0	0	0	0	0	0	0	0	0	2.8e-05	0	4.5e-05	0	0	0	0	0	0	0	0.001245	0	0	0	0	0	9e-06	1e-06	2.6e-05	2.4e-05	3e-06	1e-05	7e-06	0	0	0
MIR20B	0	0	0	0	0	0	0	0	0	0	0.014922	0	0	0	0	0	0	0	0	0	0	0	0	0	0	0	0	0	0	0	0	0	0	0	0	0	0	0	0	0	0	0
MIR21	0	0.005782	0	0.000336	0	0	0	0	0	0	1e-05	9e-06	0	0	0	0	0	0	1.6e-05	7e-06	1.8e-05	1.9e-05	4.7e-05	1.3e-05	4.6e-05	0.00019	6.9e-05	8e-05	6.2e-05	8.5e-05	2e-06	6e-06	3e-06	1.2e-05	9e-06	3.1e-05	1e-06	1e-06	2e-06	4.5e-05	1e-05	9.9e-05
MIR21_1	0	0.025212	0.034593	0.00027	0	0	0	0	0	1e-06	1.9e-05	2.5e-05	0	4e-06	0	0	0	0	0	4e-06	5e-05	3.6e-05	7.5e-05	2.7e-05	7.2e-05	0.000213	8e-05	0.000121	8.1e-05	0.00011	2e-06	5e-06	3e-06	1.2e-05	9e-06	3.1e-05	2e-06	2e-06	1e-06	0.000259	3.7e-05	0.000618
MIR211	0	0	0	0	0	0	0	0	0	0	0	0	0	0	0	0	0	0	0	0	0	0	0	0	0	0	0	0	0	0	0	0	0	0	0	0	0	0	0	0	0	0
MIR214	0	0	0	0	0	0	0	0	0	0.000309	9.3e-05	0	0.000178	2.1e-05	0.000227	0	0.00028	0.000368	0.000321	0.001494	0	4.3e-05	0.000297	0.001176	0.000508	0.000351	0.002847	0.00049	0.000554	0.000633	7.1e-05	NA	NA	1.8e-05	6.8e-05	5.8e-05	0	4.1e-05	6e-06	0	0.000277	6.7e-05
MIR214_1	0	0	0	0	0.031993	0	0	0	0.023713	0.000151	0.000225	0	0.002404	0.001347	0.000697	0	0.001261	0.000129	0.000273	0.001506	0	0	0.00221	0.000132	0.00132	0.001381	0.001208	0.001816	0.001098	0.002741	5.7e-05	NA	NA	1.7e-05	4.9e-05	9.2e-05	0	7.1e-05	6e-06	0	0.000358	0.00034
MIR215	0	0	0	0	0	0	0	0	0	0.018939	0	0	0.020111	0	0	0	0.01913	0	0	0.027549	0.009102	0.000222	0	0	0	0	0	0	0.016232	0.013056	NA	NA	NA	3.09703	3.02647	1.40177	0.673566	0.863942	1.48019	0.035988	0.043199	0.032665
MIR216B	0	0	0	0	0	0	0	0	0	0	0	0	0	0	0	0.00123	0	0.018311	0	0	0	0	0	0	0	0	0	0	0.022117	0	NA	0	0	0	0	NA	NA	NA	NA	0.052882	0.038378	0.061623
MIR217	0	0	0	0	0	0	0	0	0	0.01409	0	0.014939	0	0.009872	0	0.000498	0	0	0	0	0	0	0	0	0	0	0	0	0	0	0.026707	0	NA	0	NA	0	NA	0	0	0.008635	0.024794	0.020488
MIR217_1	0	0	0	0	0	0	0	0	0	0.011705	0	0.011849	0	0.000378	0	0.032616	0	0	0	0	0	0	0	0	0	0	0	0	0	0	0.280425	0	NA	0	NA	0	NA	0	0	0.053937	0.044286	0.018615
MIR218	0	0	0	0	0	0	0	0	0	0.024338	0	0	0	0	0	0	0	0	0	0.01257	0	0	0	0	0	0.033479	0	0	0	0.013983	0	0	0	NA	0	0	0	0	0	0	0	0
MIR219	0	0	0	0	0	0	0	0	0	0	0	0.02332	0.016974	0.016701	0	0	0.012487	0	0	0	0	0	0	0.041913	0	0.074517	0.044478	0.061839	0.035741	0.028412	0	0	0	NA	NA	NA	0	NA	0	0.042612	0	0.044912
MIR22	0	0.01506	0.028339	0.021287	0.007444	0.016868	0	0.064989	0	7.7e-05	0.000128	0.000113	0.000119	0.000478	0.001335	0.001224	0.000221	0.000168	0.000168	0.000144	0.000192	0.000128	0.000151	5.2e-05	0.000149	9.2e-05	0.000114	0.000371	0.00019	0.000296	0.000147	NA	NA	0.000254	0.000496	0.000416	0.000164	NA	0.000248	0.000118	0.0002	8.4e-05
MIR22_1	0	0.000191	0	0.013641	0	0	0	0.077897	0	0.000371	0.000113	0.000555	0.000581	0.000814	0.000861	0.001004	0.000386	0.000497	0.000282	0.000599	0.000546	0.000642	0.000362	9.4e-05	0.000581	0.00046	0.000354	0.000704	0.000745	0.000613	0.000137	NA	NA	0.000304	0.000534	0.000398	0.000207	NA	0.00025	0.000427	0.000776	0.000512
MIR221	0	0	0	0	0.302118	0	0	0	0	0	0	0	0	0.012589	0	0.011268	0	0	0	0	0	0	0.013032	0.012187	0.034114	0.03013	0.01038	0.007077	0.010849	0.066987	0	0	0	0	1.05926	0.312212	NA	0	NA	0.014423	0	0
MIR221_1	0	0	0	0	0.00539	0	0	0	0	0	0	0	0	0	0	0	0	0	0	0	0	0	0.014034	0.008413	0.011968	0.025912	0.049321	0.010597	0.035208	0.016833	0	0	0	0	1.49948	0.662943	NA	0	NA	0	0	0.034365
MIR222	0	0	0	0	0	0	0	0	0	0.025809	0	0	0	0	0.027444	0	0	0	0	0	0	0	0	0	0	0	0.015411	0	0	0.034439	0	0	0.074017	0	0.45397	0	0	0	0	0	0	0
MIR223	0	0	0	146.286	108.579	0	65.1735	0	0	0.005944	0.043835	0.01078	0.012231	0.013795	0.027251	0.000181	0.006748	0.024178	0.004517	0.002341	0	0.025265	0.011032	0.042969	0.07387	0.104411	0.030936	0.097792	0.034918	0.052771	0.771168	0	0.473946	2.38729	3.42541	0.997455	NA	0	0.997929	0.013395	0.033149	0.060619
MIR223_1	0	0	0	0	0	0	0	0	0	0.018172	0.051065	0.009189	0.005854	0.014374	0	0.008139	0.020665	0.025966	0.009895	0.022187	0	0.039267	0.015055	0.027136	0.045549	0.057224	0.044447	0.044369	0.049334	0.066267	0.841274	0	0.329091	2.15445	3.38175	1.12862	NA	0	0.926188	0.036911	0.036671	0.034443
MIR224	0	0	0	0	0	0	0	0	0.036624	0.000194	0.000143	0.000377	5.3e-05	2.5e-05	6e-05	7.5e-05	1.8e-05	3.3e-05	4.3e-05	6.8e-05	5.5e-05	9.4e-05	1.9e-05	5.4e-05	8.6e-05	6.1e-05	6.9e-05	6.2e-05	2.6e-05	8.5e-05	2.8e-05	3e-05	4e-05	5.4e-05	3.8e-05	2e-05	2.6e-05	6.2e-05	3.4e-05	6.7e-05	4.9e-05	5.6e-05
MIR224_1	0	0	0	0	0	0	0	0	0	0.000489	0.000402	0.000108	2.6e-05	7e-05	5.5e-05	8.6e-05	2.9e-05	8.7e-05	0.000225	0.000142	8.3e-05	0.000195	0.000112	7.8e-05	0.000272	0.000678	0.000229	0.000407	8.6e-05	0.000252	3.7e-05	1.3e-05	5.8e-05	4.9e-05	4.8e-05	1.6e-05	3.8e-05	8.4e-05	2.5e-05	0.00015	0.000202	0.000273
MIR2284A	0	0	0	0	0	0	0	0	0	0	0	0	0	0	0	0	0	0	0	0	0	0	0	0	0	0.044789	0	0	0	0	0	0	0	0	0	0	0	0	0	0	0	0
MIR2284B	0	0	0	0	0	0	0	0	0	0	0	0	0	0	0	0	0	0	0	0	0	0	0	0	0	0	0	0	0	0	0	0	0	0	0	0	0	0	0	0	0	0
MIR2284C	0	0	0	0	0	0	0	0	0	0.020437	0	0	0	0	0	0	0	0	0	0	0.016718	0	0	0	0	0	0	0	0	0	0	0	NA	3.16155	3.12964	1.97058	0.393334	NA	2.00574	0.035623	0.027099	0.057428
MIR2284D	0	0	0	0	0	0	0	0	0	0	0	0	0	0	0	0	0	0	0	0	0	0	0	0	0	0.071262	0.029747	0	0.020548	0.031179	0	0	0	NA	0	0	NA	NA	NA	0.042362	0.013592	0.076504
MIR2284E	0	0	0	0	0	0	0	0	0	0	0	0	0	0	0	0	0	0	0	0	0	0	0	0	0	0	0	0	0	0	0	0	0	0	0	0	0	0	0	0	0	0
MIR2290	0	0	0	0	0	0	0	0	0	0	0	0	0	0	0	0	0	0	0	0	0	0	0	0	0	0	0	0	0	0	0	0	0	0	0	0	0	0	NA	0	0	0
MIR2318	0	2.10067	0	0	0	0	0	0	0	0.024042	0.025689	0.024466	0	0.02803	0.019896	0.029416	0	0	0	0.027955	0.030668	0.04078	0.028416	0.011944	0	0.091632	0	0.013666	0.053283	0.049714	NA	0	0.023507	0.959405	NA	NA	NA	0	NA	0.017562	0.04465	0.042556
MIR2320	0	0	0	0	0	0	0	0	0	0	0.024079	0	0	0	0	0	0.033299	0	0	0	0.01878	0.026973	0	0.022086	0	0.057225	0	0	0	0	NA	NA	NA	NA	NA	1.07044	NA	NA	NA	0.040062	0.055296	0.056452
MIR2331	0	0	0	1.90828	0	0	0	0	0	0.028168	0.015246	0.008258	0	0.004796	0.01473	0	0.004306	0	0.06048	0.021498	0.013757	0.007412	0.004337	0.006388	0.016725	0.020557	0.017728	0.047065	0.001745	0.027564	NA	0	0	NA	1.39217	NA	0.249616	0.622739	NA	0	0.025825	0.02358
MIR2332	0	0	0	0	0	0	0	0	0	0.024383	0.043917	0.024239	0.035567	0.030358	0	0.023852	0	0.016168	0	0	0.016109	0.011906	0.033813	0.031714	0.054273	0.073329	0.052805	0	0.019436	0.039364	1.77018	2.44636	3.06046	10.0922	15.1576	9.07644	7.81436	7.52681	6.18601	0.02935	0.028566	0.034248
MIR2335	0	0	0	0	0	0	0	0	0	0.06706	0.017529	0.017869	0.008701	0.016555	0.007554	0.03318	0.003391	0.010469	0.006499	0.01939	0.009627	0.002192	0.011019	0.011657	0.013699	0.009508	0.010236	0.012513	0.021616	0.013529	0.163581	NA	NA	1.66527	4.64779	1.49097	NA	NA	1.30422	0.162949	0.009778	0.034492
MIR23A	0	0	0	0	0	0	0	0	0	0	0	0	0	0	0	0	0	1e-06	0	5e-06	0	0	0	1.1e-05	0	0	2e-06	1e-06	0	1.6e-05	NA	NA	NA	5e-06	NA	NA	NA	NA	NA	5e-06	3e-06	1.3e-05
MIR23B	0	0	0	0	0	0	0	0.028724	0	1.3e-05	5e-06	6e-06	8e-06	5e-06	7e-06	1.6e-05	3e-06	1.4e-05	9e-06	1.4e-05	2.3e-05	1.7e-05	4e-06	5e-06	4e-06	1e-06	6e-06	5e-06	3e-06	0.000156	1e-06	1e-06	4e-06	0	9e-06	7e-06	0	0	0	5e-06	5e-06	2e-06
MIR23B_1	0	0	0	0	0	0	0	0.002302	0	0.000139	1.6e-05	1.9e-05	2e-05	4.9e-05	2.2e-05	3.5e-05	2.2e-05	2.3e-05	2.5e-05	5.7e-05	4e-05	2.2e-05	8e-06	1.8e-05	1.5e-05	6e-06	4.8e-05	3e-05	2e-06	0	0	0	9e-06	0	0	1e-05	0	0	0	4e-06	2e-05	1.3e-05
MIR24	0	0	0	0.026829	0.001147	0.052531	0	0	0.030598	6e-06	1.6e-05	1e-06	5e-05	2.3e-05	3.1e-05	5.8e-05	3e-05	1.6e-05	0.00011	3.8e-05	1.3e-05	1.1e-05	3e-06	6.8e-05	1.3e-05	2.9e-05	1.2e-05	5.5e-05	3.1e-05	0.000162	4e-06	2e-06	2e-06	2e-06	2e-05	1.6e-05	0	1e-06	1e-06	3e-06	3e-06	6e-06
MIR24_1	0.170472	0.046869	0.035333	0.014758	0.072051	0.146458	0.024757	0	0.084684	1.5e-05	4.7e-05	3.6e-05	6.1e-05	5.9e-05	8.3e-05	0.000114	0.000153	2.6e-05	0.000131	0.000139	1.1e-05	1.7e-05	7e-06	8.8e-05	6.2e-05	2.9e-05	2.5e-05	8.7e-05	5.1e-05	0.000609	4e-06	4e-06	3e-06	2e-06	2.3e-05	2.2e-05	0	1e-06	1e-06	3e-05	9e-06	3.2e-05
MIR2404	0.127407	0.002387	0.002197	0.020067	0.180668	0.203556	0.023184	0.004523	0.026581	0.000544	0.000254	8.8e-05	0.000302	0.000135	0.000246	0.000296	0.000766	0.000324	0.00053	0.00044	0.000263	0.000569	8.5e-05	0.000108	0.000363	0.000144	0.000391	0.0002	0.000329	0.000274	5e-05	2.9e-05	3.4e-05	3.2e-05	6.8e-05	4.8e-05	NA	9.5e-05	5.9e-05	6.3e-05	0.000106	0.00036
MIR2411	0	0	1.58773	3.82516	3.63054	0.808331	0	0	1.48167	0.014179	0.033073	0.024501	0.018266	0.016783	0.012864	0.012093	0.028515	0	0.039703	0.030423	0	0.02928	0.010715	0.011851	0.156629	0.262371	0.210534	0.023255	0.073153	0.047011	0.656921	0.552131	NA	2.62387	3.02647	1.8584	1.87626	3.4978	2.3663	0.237433	0.030723	0.23803
MIR2411_1	0	0	0	0	0	2.50635	0	0	0	0.003916	0.00651	0.007739	0.00344	0.014063	0.029946	0.004996	0.006453	0.089652	0.007057	0.016482	0.228305	0.01023	0.00692	0.018731	0	0.033866	0.182399	0.024624	0.152064	0.014503	0.545609	0.555085	NA	2.8165	3.31596	2.0478	2.08273	3.67546	2.919	0.031555	0.009545	0.151044
MIR2432	0	0	0	0	0	0	0	0	0	0	0	0	0	0	0	0	0.025024	0	0	0	0	0	0	0.004118	0	0.016116	0	0.005703	0	0	0	0	0	0	0	0	0	0	NA	0	0.010287	0.013553
MIR2483	0	0	0	0	0	0	0	0	0	0	0	0	0	0	0	0	0	0	0	0	0	0	0	0	0	0	0	0	0	0	0	0	0	0	0	0	0	0	0	0	0.02742	0
MIR2483_1	0	0	0	0	0	0	0	0	0	0	0	0	0	0	0	0	0	0	0	0	0	0	0	0	0	0	0	0	0	0	0	0	0	0	0	0	0	0	0	0	0.026832	0
MIR25	0	1.07488	0	0	0	0	0	0	0	0.01925	0.03851	0.016542	0.00268	0.03241	0.011531	0.078454	0.030079	0.016336	0.114369	0.05655	0.006451	0.046204	0.016774	0.169411	0.13699	0.028531	0.144095	0.343543	0.09478	0.02845	0.624859	0.604943	0.631317	6.63168	9.3031	3.33349	3.614	3.40684	4.60731	0.025269	0.079455	0.101508
MIR25_1	0	0	0	0	0	0	2.49498	0	1.52015	0.029467	0.038696	0.016896	0.023229	0.015295	0.029128	0.020159	0.03753	0.045832	0.014118	0.00863	0.021767	0.0282	0.019512	0.022989	0.045435	0.01635	0.050541	0.034598	0.040155	0.031679	0.713808	0.555992	0.772356	5.73067	8.34342	3.558	2.84789	3.06689	4.50056	0.009667	0.014892	0.04107
MIR26A	0	0	0	0	0	0	0	0	0	0	0	0	0	0	0.019785	0	0	0	0.013451	0	0	0	0	0	0.030378	0.08423	0.01858	0.023278	0.014036	0.013088	0	0	NA	0	NA	0	0	0	0	0	0	0
MIR26A_1	0	0	0	0	0	0	0	0	0	0	0	0	0	0	0.019785	0	0	0	0.018967	0	0	0	0	0	0.02994	0.045771	0.000791	0	0.017103	0.036158	0	0	NA	0	NA	0	0	0	0	0	0.032911	0.066724
MIR26B	0	0	0	0	0	0	0	0	0	0	0	1.6e-05	0	0	0	0.003272	0	0.003704	0.010034	0	0.008961	0	0	0.00028	0	0.013414	0.007372	0	0.006808	0	NA	0	NA	0.686273	1.05926	0.80283	NA	0.392277	0	0	0.020605	0.031714
MIR26B_1	0	0	0	0	0	0	0	0	0	0	0.021717	0	0	0	0	0.012697	0.008532	0	0.000148	0	0	0.00142	0	0.005322	0	0.013414	0.005926	0	0	0.008916	0.350531	0	0	0.645214	1.1762	0.340595	0.272308	0.343242	0	0.044535	0.020605	0.02105
MIR27A	0	0	0	0	0	0	0	0	0	0	0	0	0	1e-06	0	0	0	0	0	0	0	0	0	0	0	0	0	0	0	0	NA	NA	NA	NA	NA	NA	0	NA	NA	1e-06	0	5e-06
MIR27A_1	0	0	0	0	0	0	0	0	0	0	0	0	0	0	0	0	0	0	0	0	0	0	0	0	0	0	0	1e-06	0	0	NA	NA	NA	NA	NA	NA	0	NA	NA	0	5.2e-05	9e-06
MIR27B	0	0	0	0	0	0.048566	0	0.000647	0	8e-06	1.3e-05	6e-05	1.5e-05	2.1e-05	1.6e-05	0.000328	0.00019	0.000111	1.7e-05	4e-06	0.000174	1.7e-05	2e-06	4e-06	6e-06	1.5e-05	3e-06	2.5e-05	8e-06	0.001908	1e-06	2e-06	2e-05	3e-06	3.1e-05	6.5e-05	2e-06	4e-06	5e-06	7e-06	8.8e-05	1.6e-05
MIR27B_1	0	0	0	0.015481	0	0	0	0.062162	0	6e-06	6.2e-05	2.2e-05	3e-05	7e-05	4.9e-05	0.000106	0.000177	0.000142	3.5e-05	4.9e-05	4.4e-05	3e-05	3e-06	1.4e-05	3.2e-05	7.7e-05	7e-06	4.4e-05	6e-06	0.000342	3e-06	3e-06	1.5e-05	3e-06	3.7e-05	6.3e-05	3e-06	4e-06	4e-06	8e-05	6.2e-05	7.6e-05
MIR28	0	0	0	0	0	0	0	0	0	0	0	0	0	0	0	0	0	0	0	0	0	0	0	0	0	0.029887	0	0	0	0.01561	0	0	0	0	NA	0	NA	NA	0	0.005123	0.015105	0.033268
MIR28_1	0	0	0	0	0	0	0	0	0	0	0	0	0	0	0	0	0	0	0	0	0	0	0	0	0	0.028646	0	0	0	0.047353	0	0	0	0	0.626911	0	0	NA	0	0.024195	0	0.003656
MIR296	0	0	0	0	0	0	0	0	0	0	0.025331	0	0	0.020461	0.019644	0	0	0.012875	0	0.040267	0.068665	0.020293	0.011427	0.035299	0.030868	0.054851	0.099508	0.060314	0.054596	0.082857	0	0	0	0	NA	NA	0	NA	NA	0	0.028777	0
MIR29A	0	0	0	0	0	0	0	0	0	0	6e-06	0	0	0	0	9.6e-05	0	0.000189	0	0	0	0	0	0.000342	0	7.1e-05	2.8e-05	0.000235	0	0	0	1e-06	0	NA	2e-06	0	0	0	1e-06	1.3e-05	9e-06	4.8e-05
MIR29A_1	0	0	0	0	0	0	0	0	0	0	0	0	0	0	0	0.00023	0	0	0	0.000446	0	0	0	0.000577	0	0.000245	0.000166	0.000614	0.000116	0	0	1e-06	0	NA	3e-06	0	0	0	0	1.7e-05	9.4e-05	0.000258
MIR29B	0	0.046071	0	0	0	0	0	0	0	5.5e-05	0.000263	6e-05	0.000137	0.000259	0.001179	4.9e-05	7.6e-05	0.000272	5.6e-05	4e-06	2.3e-05	6.5e-05	4.8e-05	0.000131	0.000241	0.000198	0.000805	0.000238	0.00011	0.000173	2.5e-05	7e-06	NA	NA	2.2e-05	5.4e-05	NA	NA	NA	1.9e-05	3.3e-05	4.3e-05
MIR29B_1	0	0	0	0	0	0	0	0	0	5e-05	0.000272	7.4e-05	0.00036	0.000316	0.000151	9.9e-05	0.000127	0.000363	0.000168	0.000127	0.000129	0.000293	0.000116	0.0002	0.000531	0.000413	0.000431	0.000374	0.000351	0.000543	2.2e-05	2.8e-05	NA	NA	1.9e-05	3.8e-05	NA	NA	NA	3.1e-05	8.9e-05	0.000195
MIR29C	0	0.823864	1.04372	0.533579	0.452653	0	0.386973	0.806198	0	0	0	0	0	0	0	0	0	0	0	0	0	0	0	0	0	0	0	0.011505	0	0	0	0	0	0	0	0	0	0	0	0	0	0
MIR29C_1	0	0.035435	0	0	0.74325	0	0	0	0	0	0	0	0	0	0	0	0	0	0	0	0	0	0	0	0	0	0	0.004208	0	0	0	0	0	0	0	0	0	0	0	0	0	0
MIR301A	0	0	0	0	0	0	0	0	0	0	0	0	0	0	0	0	0	0	0	0	0	0	0	0	0	0	0	0	0	0	0	0	0	NA	NA	0	0	0	0	0	0	0
MIR301A_1	0	0	0	0	0	0	0	0	0	0	0	0	0	0	0	0	0	0	0	0	0	0	0	0	0	0	0	0	0	0	0	0	0	0.258086	NA	0	0	0	0	0	0	0.009397
MIR301B	0	0	0	0	0	0	0	0	0	0	0	0	0.069307	0	0	0	0	0	0	0.002485	0	0	0	0	0.042639	0.007336	0	0	0	0	0	0	0	NA	0	NA	0	0	0	0	0.057794	0
MIR30A	0	0	0	0	0	0	0	0	0	0	0	0	0	0	0	0	0	0	0	0	0	0	5e-06	0	0	0	6e-06	0	0	0	0	NA	NA	1e-06	NA	NA	1e-06	2e-06	2e-06	9e-06	1.3e-05	8e-06
MIR30A_1	0	0	0	0	0	0	0	0	0	0	5e-06	0	0	0	0	0	0	0	0	0	2e-06	0	5e-06	0	0	0	6e-06	0	8e-06	0	0	NA	NA	1e-06	NA	NA	1e-06	2e-06	2e-06	8e-06	1.8e-05	1.6e-05
MIR30B	0	0	0	0	0	0	0	0	0	0	0	0	7.6e-05	0	0	0	0	0	0	0	0	0	0	0	0	0	0	0	0	0	1.1e-05	2e-06	NA	NA	NA	4.4e-05	NA	NA	NA	5.4e-05	7e-06	6e-06
MIR30B_1	0	0	0	0	0	0	0	0	0	0	0	0	1e-05	0	0	0	0	0	0	0	0	0	0	0	0	0	0	0	0	0	0	1e-06	NA	NA	NA	2.4e-05	NA	NA	0	4e-05	1e-06	6e-06
MIR30C	0	0	0	0	0	0	0	0	0	0	0	0	0.019613	0	0	0	0	0	0	0	0	0	0	0	0	0	0	0	0	0.010156	0	0	NA	0	0.605294	NA	0	0	0	0	0	0.012577
MIR30C_1	0	0	0	0	0	0	0	0	0	0	0	0	0.018879	0	0	0	0	0	0	0	0	0	0	0	0	0	0	0	0	0.027424	0	0	NA	0	0.90794	NA	0	0	0	0	0	0.015154
MIR30D	0	0	0	0	0	0	0	0	0	0	0	0	0	0	0	8e-05	0	0	8.9e-05	0	0	0	4.8e-05	0	0	0	0	0	0	0	0	1e-06	NA	NA	NA	1.6e-05	0	NA	NA	2e-06	4.4e-05	1.7e-05
MIR30E	0	0	0	0	0	0	0	0	0	0	0	0	0	0	0	0	0	0	0	0	0	0	0	0	0	0	0	0	0	0.000248	0	NA	0	0.424766	NA	1.24327	0	NA	0	0.017634	0.013676	0.010847
MIR30E_1	0	0	0	0	0	0	0	0	0	0	0	0	0	0	0	0	0	0	0	0	0	0	0	0	0	0	0	0	0	0	0	0	0.091947	0.516171	NA	1.33805	0	0.294207	0	0.024711	0.017382	0.033631
MIR30F	0	0	0.004655	0.000146	0	0	0	0	0	3.3e-05	3.2e-05	0.000206	0.000924	2.6e-05	5.7e-05	5.4e-05	8.2e-05	1e-05	3.6e-05	0.000192	3.5e-05	5.4e-05	5.5e-05	0.001085	0.000333	0.000644	0.000397	7.4e-05	0.000205	0.000124	NA	NA	NA	3.1e-05	NA	NA	7e-06	5e-06	7e-06	3e-06	6e-06	3e-06
MIR30F_1	0.179601	0	0.001509	0	0	0.047584	0.010713	0	0.001256	0.000158	0.000198	0.000147	0.000274	0.000153	0.000329	0.000252	0.000372	0.000163	0.000124	0.000111	0.000194	0.000296	0.000183	0.000258	0.000209	0.000218	0.000413	0.000197	0.000497	0.000326	NA	NA	NA	7e-06	NA	NA	1e-06	2e-06	4e-06	1.4e-05	1e-05	1.5e-05
MIR320	0	0	0	0	0	0	0	0	0	0	0	0	0	0.020539	0	0	0	0	0	0	0	0	0	0	0	0	0	0	0	0	0	0	0	0	0.45397	NA	0	0	NA	0	0.024463	0
MIR323A	0	0	0	0	0	0	0	0	0	0	0	0	0	0	0	0.012097	0.006232	0.020818	0	0.005862	0.016301	0.022736	0.010302	0	0	0	0.014304	0	0.047404	0	0	NA	0	0.872575	NA	0	NA	NA	NA	0.011609	0.013154	0.031215
MIR323B	0	0	0	0	0	0	0	0	0	0	0	0.011178	0	0	0	0	0	0	0	0.020279	0.009	0.019194	0.00048	0	0	0	0	0.061655	0	0	0	0	0	0.9033	0	NA	0.249616	NA	NA	0.020469	0	0.037643
MIR324	0	0	0.084076	0	0	3.55421	0	0	0	0.032024	0.040367	0.025349	0.06167	0.02303	0.031756	0.015684	0.039963	0.028639	0.005148	0.054666	0.038572	0.032871	0.037901	0.025457	0.10683	0.050958	0.042246	0.054833	0.046372	0.069404	NA	NA	NA	9.99775	6.18264	5.03362	3.66895	4.10956	5.51708	0.023231	0.023356	0.028939
MIR324_1	0	0	0.169683	0	0	0	0.865662	0	0	0.046235	0.072119	0.045986	0.036233	0.041006	0.047251	0.03877	0.040973	0.04986	0.03282	0.040002	0.033261	0.048345	0.079969	0.049803	0.074474	0.08208	0.070413	0.066095	0.071727	0.100328	NA	NA	NA	11.4063	6.80297	5.1544	4.32305	4.59219	5.87373	0.080631	0.066526	0.073195
MIR326	0	0	0	0	0	0	0	0	0	0	0	0	0	0	0	0	0	0.039733	0	0.012818	0.011197	0	0	0	0	0.010592	0.008646	0	0	0.042295	0	0.072626	NA	NA	0.211853	NA	0	0	NA	0.025658	0.007181	0.017995
MIR326_1	0	0	0	0	0	0	0	0	0	0	0	0	0.020094	0	0	0	0.007713	0	0	0.021307	0.009169	0	0	0	0	0.042749	0	0.085811	0	0.014956	0	0	NA	0	0.302647	NA	0	0	NA	0	0.013045	0.026591
MIR328	0	0	0	0	0	0	0	0	0	0.012851	0.131076	0.067171	0	0.008032	0	0.000553	0.027099	0.027045	0.016975	0.063859	0.006829	0.035633	0.037639	0.022972	0.186387	0.108996	0.026331	0.038906	0.082329	0.086507	0	0	0	0	NA	0	0	0	NA	0.014376	0	0.014973
MIR329A	0	0	0	0	0	0	0	0	0	0	0	0	0	0	0	0.004731	0	0	0	0.039949	0.004376	0	0	0	0	0.020626	0	0	0	0.048525	NA	0	0	NA	0.756617	0	1.28311	NA	0.697874	0.023776	0.028365	0.008536
MIR329A_1	0	0	0	0	0	0	0	0	0	0	0	0	0	0	0	0.012812	0	0	0	0	0.001665	0.02185	0	0	0	0	0	0	0	0	0	0	0	NA	1.51323	0.120425	1.45193	NA	0.760797	0.028957	0.022494	0.013494
MIR329B	0	0	0	0	0	0	0	0	0	0.013417	0.032212	0	0.006828	0	0	0	0.020294	0.021035	0.025783	0.011874	0.000217	0.01828	0	0.013407	0.029908	0	0.00556	0.053569	0.001783	0	NA	0	0	NA	NA	0	NA	NA	NA	0.014114	0.023124	0.0245
MIR330	0	0	0	0	0	0	0	0	0	0.018839	0	0.004055	0.012977	0.016335	0	0.027778	0	0	0.009841	0	0	0	0	0	0.040834	0	0.004093	0.006739	0	0.018577	0	NA	NA	NA	1.36191	0.80283	0.499231	NA	NA	0.016555	0.004726	0
MIR330_1	0	0	0	0	0	0	0	0	0	0.000421	0.035739	0.013524	0.011871	4e-05	0	0.017066	0	0	0.00981	0	0	0	0	0	0	0	0.027097	0.000149	0	0.036295	0	NA	NA	NA	1.06683	0.669025	0.499231	NA	NA	0.017851	0.017881	0
MIR331	0	0.002693	0	0	0.020681	0	0	0	0	1e-05	1.1e-05	8e-06	4.2e-05	3.8e-05	4.3e-05	3e-06	7e-06	4.1e-05	5.7e-05	0.000221	1.4e-05	0	9.5e-05	4e-06	8.4e-05	0.000227	0.000286	0.000183	0.000117	0.00034	2e-06	0	0	1e-06	4e-06	2e-06	1e-06	0	0	3.1e-05	5.6e-05	1.3e-05
MIR331_1	0.000257	2.7e-05	0.000158	8.8e-05	0	0.000307	0.015808	0	0	5.3e-05	1.3e-05	0	1.3e-05	2.6e-05	1.5e-05	0.000129	7.6e-05	0.000139	6.7e-05	0.000127	1e-06	0	0.000104	0	2.9e-05	0.000228	0.000181	0.000107	0.000102	0.000249	2e-06	0	0	1e-06	5e-06	3e-06	1e-06	1e-06	1e-06	5.9e-05	3.6e-05	4.9e-05
MIR335	0	0	0	0	0	0	0	0	0	0	0	0	0	0	0	0	0	0	0	0	0	0	0	0	0	0	0	0	0	0	0	0	0	0	0	NA	0	0	0	0	0	0
MIR335_1	0	0	0	0	0	0	0	0	0	0	0	0	0	0	0	0	0	0	0	0	0	0	0	0	0	0	0	0	0	0	0	0	0	0	0	NA	0	0	0	0	0	0.071397
MIR338	0	0	0	0	0	0	0	0	0	0	0	0	0	0.009112	0	0.017901	0	0	0	0	0	0	0	0	0	0	0	0	0	0	0	0	0	0	0	NA	0	0	0	0.012738	0	0
MIR338_1	0	0	0	0	0	0	0	0	0	0	0	0	0	0.014077	0	0.013726	0	0	0	0	0	0	0	0	0	0	0	0	0	0	0	0	0	0	0	NA	0	0	0	0.026896	0	0
MIR33A	0	0	0	0	0	0	0	0	0	0.026278	0	0	0	0.010335	0	0	0.032716	0	0	0.028753	0.026305	0.043687	0	0	0	0.01609	0.010382	0	0	0	0	0	0	0	NA	NA	0	NA	NA	0.044418	0	0
MIR33A_1	0	0	0	0	0	0	0	0	0	0.00064	0	0	0	0	0	0	0	0	0	0	0	0.016732	0.041898	0	0	0.01677	0.033672	0	0	0	0	0	0	0	NA	NA	0	NA	NA	0.046064	0	0
MIR33B	0	0	0.100001	0	0	0	0	0	0	0.030786	0.030381	0.013941	0.020674	0.01661	0.025643	0.024899	0.025568	0.030428	0.017891	0.02426	0.024624	0.02562	0.021582	0.03694	0.040779	0.03573	0.032472	0.05434	0.024857	0.052596	NA	0.458693	0.540649	1.67756	1.97517	0.943677	1.16487	2.25559	1.5216	0.03014	0.048972	0.037548
MIR33B_1	0	0	1.3605	0	0	0	0	0	0	0.0355	0.043757	0.030388	0.036012	0.038382	0.03985	0.043118	0.045326	0.019097	0.03056	0.03459	0.024281	0.033069	0.033762	0.033619	0.064504	0.035088	0.042873	0.047435	0.059465	0.071823	NA	0.509659	0.617885	1.51164	1.67897	0.936635	1.16487	2.19955	1.41291	0.03881	0.070407	0.044295
MIR340	0	0	0	0	0	0	0	0	0	0	0	0.02574	0	0	0	0	0	0	0	0	0.018557	0	0	0.013844	0.012031	0.031897	0	0.024636	0	0	0	NA	NA	0.645214	0.66032	1.55125	0.665682	NA	NA	0.03468	0.025923	0.051094
MIR340_1	0	0	0	0	0	0	0	0	0	0.026016	0	7.7e-05	0.017983	0	0	0	0	0.010237	0	0	0.005535	0	0	0.019044	0.030532	0	0	0.000219	0.039758	0.073606	0	0.076449	NA	0.768391	0.550267	2.18986	0.616516	0.294207	0.622497	0.03894	0.047621	0.035445
MIR342	0	0	0	0	0	0	0	0	0	0	0	0	0.022429	0	0	0	0.015612	0	0.01658	0	0	0	0	0.00362	0.025565	0.058478	0	0	0	0.041777	0	0	NA	0	0	NA	0	0	0	0.015404	0.016208	0.013346
MIR342_1	0	0	0	0	0	0	0	0	0	0	0	0	0.01109	0	0	0.049467	0.021631	0	0.017029	0	0.046123	0	0	0.048051	0.034508	0.035204	0	0	0	0.015158	0	0	NA	0	0	NA	0.079423	0	0	0.023042	0.037638	0.028077
MIR3431	0	0	7.7e-05	0	0	0	0.014079	0	0.214346	0.00204	0.000684	0.000105	4.8e-05	0.000223	3e-05	0.00025	0.000149	4.4e-05	6.3e-05	0.000476	7.8e-05	0.001635	0.000433	0.000234	0.003417	0.00026	0.003865	0.001644	0.000135	0.000182	0	9e-06	3.1e-05	0.000111	0.000163	0.0001	2.9e-05	6.9e-05	4.4e-05	0.000252	0.000132	6.3e-05
MIR3431_1	0	1.3e-05	0	0	0	0	0.00112	0.001941	0.010434	0.000712	0.000552	0.000191	4.6e-05	0.000319	0.000183	0.00048	0.000433	0.0001	0.000289	0.000154	0.000111	0.000267	9e-05	0.000379	0.00044	0.000263	0.000402	0.000779	0.000281	0.000593	0	1.2e-05	2.5e-05	0.000123	0.000139	7.5e-05	3.8e-05	6.3e-05	3.5e-05	0.000298	0.000107	0.000137
MIR3432	0	0	0	0	0	0	0	0	0	0.009418	0	0	0	0.017679	0.030511	0.098252	0.005967	0.066501	0.008628	0.007527	0.016426	0.031445	0	0.006744	0	0.016858	0.039886	0	0.006485	0.033391	NA	0	NA	1.03821	2.07038	1.11301	0	NA	NA	0.005796	0.01152	0.006903
MIR3432_1	0	0	0	0	0	0	0	0	0	0.013324	0	0	0.002115	0.037799	0.007536	0.006281	0.03593	0	0.017311	0.014582	0.001309	0.002959	0.055727	0.025321	0	0.023891	0.039126	0.028558	0.029608	0.025959	0.006373	0	NA	0.774257	1.67144	1.28331	0	0.213969	0.434741	0.030178	0.019161	0.031545
MIR345	0	0	0	0	0	0	0	0	0	0.006485	0.007273	0.016048	0.010626	0.004382	0.011355	0	0	0	0.009856	0.015081	0.003133	0.010146	0.009846	0	0.028627	0	0	0	0	0	0	0	0.077236	0	NA	NA	0	0	0.217371	0.002074	0.020159	0.026069
MIR345_1	0	0	0	0	0	0	0	0	0	0.000485	0.022399	0.007546	0.018793	0.022018	0.019263	0	0	0.026324	0.017171	0.015744	0.000293	0.009565	0.021337	0	0.068125	0.030593	0	0	0	0	0.070106	0	0.077236	0	NA	NA	0	0	0.217371	0.066226	0.052648	0.045081
MIR346	0	0	0	0	0	0	0	0	0	0	0	0	0	0	0	0	0	0	0	0	0	0	0	0	0	0	0	0	0	0	0	0	0	0	0	0	0	0	0	0	0	0
MIR34A	0	0	0	0	0	0	0	0	0	0	0	0	0	0	0	0	0	0	0	0	0	0	0	0	0	0.003285	0	0	0	0.021463	0	0	0	NA	NA	NA	0	0	0	0.002419	0	0.034158
MIR34B	0	0	0	0	0	0	0	0	0	0	0	0	0	0	0	0	0	0	0	0	0	0	0	0	0	0	0	0	0	0	0	0	0	0	0	0	0	0	0	0	0	0
MIR34B_1	0	0	0	0	0	0	0	0	0	0	0	0	0	0	0	0	0	0	0	0	0	0	0	0	0	0	0	0	0	0	0	0	0	0	0	0	0	0	0	0	0	0
MIR34C	0	0	0	0	0	0	0	0	0	0	0	0	0	0	0	0	0	0	0	0	0	0	0	0	0	0	0	0	0	0	0	0	0	0	0	0	0	0	0	0	0	0
MIR34C_1	0	0	0	0	0	0	0	0	0	0	0	0	0	0	0	0	0	0	0	0	0	0	0	0	0	0	0	0	0	0	0	0	0	0	0	0	0	0	0	0	0	0
MIR361	0	0	0	0	0	0	0	0	0	0	0	0	0	0	0	0	0	0	0	0	0	0	0	0	0	0	0	0	0	0	0	0	0	0	NA	NA	0	0	NA	0	0	0.015009
MIR361_1	0	0	0	0	0	0	0	0	0	0	0	0	0	0	0	0	0	0	0	0	0	0	0	0	0	0	0	0	0	0	0	0	0	0	NA	0	0	0	NA	0	0	0.01794
MIR362	0	0	0	0	0	0	0	0	0	0	0	0	0	0	0	0	0	0	0	0	0	0	0	0	0	0	0	0	0	0	0	0	0	NA	0	0	NA	0	0	0.025035	0	0.014534
MIR362_1	0	0	0	0	0	0	0	0	0	0	0	0	0	0	0	0	0	0	0	0	0	0	0	0	0	0	0	0	0	0	0	0	0	0.037638	0	0	NA	0	0	0.013971	0	0.058103
MIR363	0	0	0	0	0	0	0	0	0	0	0	0	0	0.003357	0	0	0	0	0	0.04475	0	0	0.00577	0	0.015805	0	0	0.028152	0.030497	0	0	0	0	0	0	0	0	0	NA	0	0.004163	0
MIR363_1	0	0	0	0	0	0	0	0	0	0	0.036976	0	0	0.009717	0	0	0.061698	0.022886	0	0	0	0.022223	0.012155	0	0.023604	0	0	0.027553	0	0	0	0	0	0	0	0	0	0	NA	0	0.019267	0
MIR365	0	0	0	0	0	0.043692	0	0.000109	0	7.6e-05	5e-06	0	0	2.7e-05	1.8e-05	5.4e-05	0.000122	0	1.4e-05	2.3e-05	1e-06	0	1.3e-05	3.4e-05	1.4e-05	0.000117	1.1e-05	3.1e-05	1.2e-05	4.4e-05	2.3e-05	0	6.9e-05	8.5e-05	2.5e-05	9.4e-05	3e-05	0.000373	0.000438	0.000104	1.1e-05	2.4e-05
MIR369	0	0	0	0	0	0	0	0	0	5.6e-05	0	0	0.012224	0	0	0	0	0	0.002082	0	0.006659	0	0	0	0	0	0	0	0.017111	0.024795	0	0	0.198606	NA	0	0	NA	0	0	0	0	0
MIR369_1	0	0	0	0	0	0	0	0	0	0.023536	0	0	0.014568	0	0	0	0	0	0.016297	0	0	0	0	0	0	0	0	0	0.012674	0.024795	0	0	0.463414	NA	0	0	NA	0	0	0	0	0
MIR374A	0	0	0	0	0	0	0	0	0	0.000103	0	0	0	0	0	0	0	0.007469	0	0.017289	0.001036	0	0	0	0.017192	0.016963	0	0.032687	0.008277	0	0	0.076449	0	0.258086	1.225	0.133805	0	0	0	0.009098	0	0.006589
MIR374A_1	0	0	0	1.48652	0	0	0	0	0	0.031883	0	0	0	0	0	0	0	0.01754	0	0.01804	0.012555	0	0	0	0.029898	0.010219	0	0	0.012076	0	0	0.066024	0	0.258086	0.90794	0.133805	0	0.017831	0	0	0	0.012653
MIR374B	0	0.004056	0.000722	0.002308	0	0.000319	0.023567	0	0.005736	0.000113	5.7e-05	4.2e-05	7.1e-05	0.000142	8.4e-05	8.4e-05	0.000134	0.000108	0.000108	8.6e-05	4.8e-05	0.000212	0.000445	0.000279	8.8e-05	0.000426	8.2e-05	0.00028	8e-05	0.002556	9e-06	3.1e-05	2e-05	1.8e-05	3.3e-05	2.7e-05	7e-06	1.3e-05	1.5e-05	0.000245	6.5e-05	7.4e-05
MIR374B_1	0	0	0.019571	0	0	0.032852	0.003316	0	0	0.000292	0.000409	0.000249	0.000345	0.000413	0.000447	0.000415	0.000283	0.000288	0.000699	0.000664	0.000204	0.000523	0.000502	0.000278	0.000499	0.000489	0.000433	0.000545	0.000394	0.000398	9e-06	3.5e-05	2.2e-05	1.6e-05	3.4e-05	2.9e-05	7e-06	1.8e-05	1.9e-05	0.000422	0.000234	0.000335
MIR376A	0	0	0	0	0	0	0	0	0	0.015712	0.023417	0	0	0	0	0.018614	0	0	0	0	0	0	0	0	0	0.053029	0	0	0	0	0	0	0	NA	0	0	NA	NA	1.19554	0	0.012337	0
MIR376B	0	0	0	0	0	0	0	0	0	0.026259	0	0	0	0	0.013158	0	0	0	0	0	0	0	0	0	0	0	0	0	0	0	0	0	0	NA	0	NA	0.624039	NA	0.622471	0	0.007912	0
MIR376B_1	0	0	0	0	0	0	0	0	0	0	0	0	0	0	0.013117	0	0	0	0	0	0	0.064059	0	0	0	0	0	0	0	0	0	0	0	NA	0	NA	0.832052	NA	0.760797	0	0.010268	0
MIR376C	0	0	0	0	0	0	0	0	0	0	0	0	0	0	0	0.002276	0	0	0.006428	0	0	0	0	0	0	0	0	0	0	0	NA	NA	0	0	0	0	NA	NA	NA	0.005237	0.010626	0
MIR376C_1	0	0	0	0	0	0	0	0	0	0	0	0	0	0	0	0.017329	0	0	0.012566	0	0	0	0	0	0	0	0	0	0	0	NA	NA	0	0	0	0	NA	0	NA	0.004536	0.016975	0.012301
MIR376D	0	0	0	0	0	0	0	0	0	0	0	0.027401	0.009313	0.018567	0	0.017456	0.026046	0	0	0	0.009019	0	0.032572	0	0.004955	0	0.049889	0	0	0	NA	0	0	NA	0	NA	1.6958	0.845262	0.755622	0.034885	0.027162	0.035677
MIR376E	0	0	0	0	0	0	0	0	0	0	0	0	0.003508	0	0	0	0.016851	0	0.004774	0	0	0	0.015081	0.012205	0	0	0	0	0	0.02232	NA	0	0	1.05581	0	0	0.378206	NA	0	0.025187	0.024114	0.014175
MIR376E_1	0	0	0	0	0	0	0	0	0	0	0	0	0	0	0	0	0.016851	0	0	0	0	0	0.014911	0.032869	0	0	0.035873	0	0	0	0	0	0	1.03234	NA	NA	0.491667	NA	0	0.025187	0.005193	0.028787
MIR377	0	0	0	0	0	0	0	0	0	0	0	0	0.004682	0	0	0	0	0	0	0	0	0	0	0	0.030889	0	0	0	0	0.02551	0	0	0	NA	0	NA	0	0	NA	0	0.015157	0.024426
MIR378	0	0	0	0	0	0	0	0	0	0.023394	0.011932	0	0	0.01415	0	0.003482	0.001054	0.006232	0	0	0.01551	0.016253	0.00348	0.009261	0.069924	0.001454	0.006331	0.007559	0.006147	0.03649	NA	NA	NA	NA	NA	NA	2.1709	0.499261	1.32398	0.004323	0.005006	0.007503
MIR378_1	0	0	0	0	0	0	0	0	0	0.022574	0.025295	0	0.019855	0	0	2.8e-05	0	0.006209	0	0	0	0.027143	0.012251	0.005795	0.044795	0.046735	0.05686	0.035583	0.031233	0.045445	0.302731	0.010425	NA	0.750795	0.804765	1.07046	2.3827	0.967318	1.88223	0.050815	0.0289	0.022293
MIR379	0	0	0	0	0	0	0	0	0	0.028633	0	0	0	0	0.01911	0	0	0	0	0	0	0.01226	0	0	0	0.046752	0	0.016946	0	0	0	0	0	0	0	0	0	0	0	0.007487	0.023655	0
MIR379_1	0	0	0	0	0	0	0	0	0	0	0	0	0	0	0	0	0	0	0	0	0	0.018227	0.021821	0	0	0.015837	0	0.016946	0	0	0	0	0	0	0	0	0	NA	0	0.012811	0.024745	0.053754
MIR380	0	0	0	0	0	0	0	0	0	0	0	0.02138	0	0	0	0.006424	0	0	0	0.022921	0.013265	0.000241	0	0.003712	0	0.003336	0	0	0	0.000808	0	NA	0	1.88515	NA	NA	0.832052	0.588415	0.869483	0.011228	0.007999	0.007289
MIR380_1	0	0	0	0	0	0	0	0	0	0	0	0.019626	0	0	0	0.028917	0	0	0	0.020342	0.009206	0.017469	0	0.016784	0.071012	0	0	0	0	0.026177	0	NA	0	1.93564	NA	NA	0.832052	0.663134	0.94194	0.02328	0.015161	0.020335
MIR381	0	0	0	0	0	0	0	0	0	0	0	0.007744	0	0.012754	0	0	0.004345	0	0	0	0	0.024905	0	0	0	0	0	0.093126	0.033938	0	0	NA	0	0	NA	NA	0.499231	NA	1.26964	0.025563	0.02377	0.051785
MIR382	0	0	0	0	0	0	0	0	0	0.050898	0	0	0	0	0	0	0	0	0	0	0	0	0.000304	0	0.016559	0.015175	0	0	0	0.015325	0	0	0	0	NA	0.80283	0.015128	0	0	0.039667	0	0.092349
MIR382_1	0	0	0	0	0	0	0	0	0	0	0	0	0	0	0	0	0	0.021802	0	0	0	0	0	0	0.038114	0.015589	0	0	0	0.033874	0	0	0	0	NA	0.80283	0.083205	0	0	0.016447	0	0
MIR383	0	0	0	0	0	0	0	0	0	0	0	0	0	0	0	0	0	0	0	0	0	0	0	0	0	0	0	0	0	0	0	0	0	0	0	0	0	0	0	0	0	0
MIR3955	1.23379	0.874704	0	0	0.766638	0	1.28829	0	0	0	0	0	0	0	0	0.03601	0	0	0	0	0	0	0	0	0	0.000625	0	0	0	0.006578	0.070106	0	0	1.24937	0.804765	0	0.57109	0	0.676813	0.005451	0.009218	0.015495
MIR3955_1	0.749614	0	0	0	0.902525	0	0.42656	1.49037	0	0	0	0	0	0	0	0.037376	0	0	0	0	0	0	0	0	0	0.062424	0	0	0	0.043547	0.33529	0	0	3.46732	2.87514	0	1.48322	0	1.08685	0.044408	0.056193	0.084257
MIR3958	0	0	0	0	0	0	0	0	0	0	0	0	0	0	0.047645	0.007344	0	0	0	0	0	0	0	0	0	0	0	0	0	0	0	0	0.023171	NA	0.234551	0	NA	NA	0	0	0.005113	0.023539
MIR3958_1	0	0	0	0	0	0	0	0	0	0	0	0	0	0	0.0017	0.009508	0	0	0	0	0	0	0	0	0	0	0	0	0	0	0	0	0	0	0	0	NA	0	0	0.019394	0.024962	0.027395
MIR3959	0	0	0	0	0	0	0	0	0	0.029031	0	0.017496	0	0	0	0.009879	0	0	0	0	0	0	0	0.026206	0	0	0	0	0	0	0	0	0	0	0	0	NA	0	NA	0.017726	0	0
MIR3959_1	0	0	0	0	0	0	0	0	0	0	0	0.02037	0	0	0	0.022693	0	0	0	0	0	0	0.051107	0.041117	0	0	0	0	0	0	0	0	0	0	0	0	NA	0	NA	0.017726	0	0
MIR409	0	0	0	0	0	0	0	0	0	0.029719	0	0.017866	0	0	0	0.0152	0	0	0.004241	0.01089	0	0	0.002286	0	0	0	0	0	0	0	0	0	0	0	0	0	0	0	NA	0.003203	0	0
MIR409_1	0	0	0	0	0	0	0	0	0	0.004121	0	0	0	0	0	0.006346	0	0	0.016202	0.019576	0	0	0.012314	0	0.04932	0	0	0.049409	0	0	0	0	0	0	0	0	0	0	NA	0.023448	0	0
MIR410	0	0	0	0	0	0	0	0	0	0	0	0	0	0.014073	0	0.005058	0	0	0	0	0	0	0	0	0	0.011964	0	0	0.026736	0	0	NA	0	0	0	0	NA	0.025583	NA	0	0	0
MIR410_1	0	0	0	0	0	0	0	0	0	0	0	0	0	0.000787	0.026275	0.011783	0	0	0	0	0.018107	0	0	0	0	0.017174	0	0	0	0	0	0	0	NA	0	NA	0	0	NA	0	0	0
MIR411A	0	0	0	0	0	0	0	0	0	0	0	0.009817	0	0	0	0.011605	0.007469	0	0	0	0	0	0	0	0	0	0	0	0	0.028176	0	0	0	0	NA	0	0	NA	NA	0.014031	0.022976	0.016368
MIR411A_1	0	0	0	0	0	0	0	0	0	0	0	0.009817	0	0	0	0.00611	0	0	0	0	0	0	0	0	0	0	0	0	0	0.021761	0.016692	0	0	NA	NA	0	0	0	NA	0.014031	0.029461	0.016368
MIR411B	0	0	0	0	0	0	0	0	0	0	0	0.011739	0	0	0	0.003964	0.005874	0.021978	0	0	0	0	0	0	0	0.054231	0	0.019819	0.022936	0.008104	NA	NA	0	0.686273	0.804765	NA	0.82827	0.882622	1.13132	0.014502	0.06851	0.033074
MIR411B_1	0	0	0	0	0	0	0	0	0	0	0	0.017296	0	0	0	0.015141	0.011461	0.020913	0	0	0	0	0	0	0	0.056814	0	0.055447	0.015569	0.020195	NA	NA	0	0.774257	1.03044	NA	0.954879	0.849933	1.5216	0.034279	0.034477	0.020669
MIR412	0	0	0	0	0	0	0	0	0	0.006067	0	0	0	0	0	0	0.014703	0	0	0	0	0	0	0	0	0	0	0	0.026421	0	0	0	0	0	0	0	0	0	0	0	0	0
MIR412_1	0	0	0	0	0	0	0	0	0	0.008515	0	0	0	0	0	0	0	0	0	0	0.000393	0	0	0	0.151034	0	0	0	0.02431	0	0	0	0	0	0	0	0	0	0	0	0	0
MIR421	0	0	0	0.010077	0	0.02853	0.000262	0.024958	0	0.000583	0.0007	0.000494	0.000303	0.000532	0.000482	0.000471	0.000317	0.000693	0.000896	0.000522	0.000479	0.000918	0.0006	0.000347	0.000642	0.000754	0.000684	0.00063	0.000736	0.000742	1e-05	3.2e-05	1.1e-05	2.8e-05	3.5e-05	3.7e-05	8e-06	3.7e-05	2.1e-05	0.000346	0.000376	0.000245
MIR423	0	0	0	0	0	0	0	0	0	1e-06	0	0	0	0	0	0	0	0	2.2e-05	0	0	2e-06	0	4e-06	0	2e-06	5e-06	1e-06	2e-05	3.6e-05	2e-06	0	NA	1e-06	3e-06	3e-06	0	NA	0	0	1e-06	0.001419
MIR423_1	0	0	0	0	0	0	0	0	0	1e-06	1e-06	3e-06	0	0	0	0	0	0	1.3e-05	0	0	0	0	1e-05	0	1.5e-05	7e-06	7e-06	1.2e-05	5.3e-05	2e-06	1e-06	NA	1e-06	3e-06	3e-06	0	NA	3e-06	0	2e-06	0.000261
MIR424	0	0	0	0	0	0	0	0	0	0	0	0	0	0	0	0	0	0	0	0	0	0	0	0	0	0	0	0	0	0	0	0	0	0	0	0	0	0	NA	0	0	0
MIR424_1	0	0	0	0	0	0	0	0	0	0	0	0	0	0	0	0	0	0	0	0	0	0	0	0	0	0	0	0	0	0	0	0	0	0	0	0	0	0	NA	0	0	0
MIR425	0	0	0	0.000621	0	0	2.1e-05	0	0	0.000345	0.001197	0.008597	0.000334	0.00917	0.000673	0	0.000419	0.00056	0.000548	0.001021	0.001542	0.000511	0.00255	0.000316	0.003429	0.000286	0.000245	0.000426	0.000998	0.000135	5e-05	0.000101	6.7e-05	4.4e-05	9.7e-05	9.3e-05	4.5e-05	6.4e-05	4.7e-05	0.001844	0.000747	0.000402
MIR425_1	0	0	0	0	0	0	0.000666	0	0	0.000348	0.000415	0.000851	0.000495	0.000377	0.000359	0.001053	0.000561	0.000268	0.000289	0.00029	0.000567	0.002094	0.000577	0.000213	0.000211	0.000434	0.000258	0.000279	0.000222	0.00028	0.000113	5.9e-05	7.5e-05	5.9e-05	0.00013	9e-05	5e-05	6.6e-05	4.8e-05	0.00082	0.000875	0.000678
MIR429	0	0	0	0	0	0	0	0	0	0	0	0.001636	0.006645	0	0.013251	0	0.009361	0.00414	0.007872	0.029297	0.015143	0.032852	0.003187	0.004343	0.018911	0.054986	0.008205	0.001598	0.002796	0.171606	0.350531	NA	0.695121	4.5165	6.44205	4.02689	3.99385	4.57189	5.54295	0.057219	0.03997	0.039426
MIR432	0	0	0	0	0	0	0	0	0	0	0	0	0	0	0	0	0	0	0	0	0	0	0	0	0	0	0	0	0	0	0	0	0	0	0	0	0	0	NA	0	0	0
MIR432_1	0	0	0	0	0	0	0	0	0	0	0	0	0	0	0	0	0	0	0	0	0	0	0	0	0	0	0	0	0	0	0	0	0	0	0	0	0	0	NA	0	0	0
MIR433	0	0	0	0	0	0	0	0	0	0	0	0	0	0	0	0	0	0	0	0	8.1e-05	0.000147	0	0	0	0	0	0	0	0	NA	NA	0	NA	NA	NA	NA	NA	0.001313	0	0	0
MIR449A	0	0	0	0	0	0	0	0	0	0	0	0	0	0	0	0	0	0	0	0	0	0	0	0	0	0	0	0	0	0	0	0	0	0	0	0	0	0	0	0	0	0
MIR449A_1	0	0	0	0	0	0	0	0	0	0	0	0	0	0	0	0	0	0	0	0	0	0	0	0	0	0	0	0	0	0	0	0	0	0	0	0	0	0	0	0	0	0
MIR449B	0	0	0	0	0	0	0	0	0	0	0	0	0	0	0	0	0	0	0	0.013868	0	0	0	0	0	0	0	0	0	0	0	0	0	0	0	0	0	0	0	0	0	0
MIR449B_1	0	0	0	0	0	0	0	0	0	0	0	0	0	0	0	0	0	0	0	0.011577	0	0	0	0	0	0	0	0	0	0	0	0	0	0	0	0	0	0	0	0	0	0
MIR449C	0	0	0	0	0	0	0	0	0	0	0	0	0	0	0	0	0	0	0	0	0	0	0	0	0	0	0	0	0	0	0	0	0	0	0	0	0	0	0	0	0	0
MIR450	0	0	0	0	0	0	0	0	0	0	0	0	0	0.055444	0	0	0	0	0.0178	0	0	0.008191	0.001808	0.007326	0.041099	0	0.020687	0	0	0.048523	0	0	0	0	0	0	0	0	NA	0	0	0
MIR450_1	0	0	0	0	0	0	0	0	0	0	0	0	0	0	0	0	0	0	0	0	0.010745	0.000507	0.018005	0.024397	0	0	0.022817	0	0	0.005222	0	0	0	0	0	0	0	0	NA	0	0	0.174194
MIR451	0	0	0	0	0	0	0	0	0	0	0	0	0	0	0	0	0	0	0	0.003017	0	0	0	0	0.074677	0	0	0	0	0	0	0	0	0	0	0	0	0	0	0.01961	0	0
MIR451_1	0	0	0	0	0	0	0	0	0	0	0	0	0	0	0	0	0	0	0	0.023664	0	0	0	0	0.043111	0	0	0	0	0	0	0	0	0	0	0	0	0	0	0	0	0
MIR454	0	0	0	0	0	0	0	0	0	0	0.028133	0	0.011194	0.019178	0.016669	0.022713	0	0	0	0	0	0	0.022818	0	0.038713	0.033279	0.059385	0	0	0.024698	NA	NA	0	1.77294	1.13164	1.47185	0.437732	NA	0.652125	0.023677	0.027296	0.037212
MIR454_1	0	0	0	0	0	0	0	0	0	0	0.008618	0	0.01226	0	0.009219	0.020933	0	0	0	0	0	0	0.014215	0	0	0.012002	0	0	0	0.017947	NA	NA	0	0.829561	1.07367	1.66301	0.356594	0.588427	0.926426	0.024478	0.021651	0.037982
MIR455	0	0	0	0	0	0	0	0	0	0	0	0	0	0	0	0	0	0	0	0	0	0	0.012182	0	0	0.02333	0	0.001638	0	0	0	0	NA	NA	NA	1.07044	0	0	0	0	0	0.009548
MIR455_1	0	0	0	0	0	0	0	0	0	0	0	0	0	0	0	0	0	0	0	0	0	0	0.003814	0	0	0	0.016967	0.009299	0	0	0	0	NA	NA	0.16508	0.924471	0	0	0	0	0	0.061313
MIR483	0	0	0	0	0	0	0	0	0	0	0	0.0312	0.034242	0.024443	0	0	0.000412	0	0	0	0.010234	0	0.002942	0.031574	0.03165	0.055436	0	0.04026	0	0.033017	0	0	NA	NA	0	0	0	0	0	0	0	0
MIR485	0	0	0	0	0	0	0	0	0	0	0	0	0	0	0	0.022292	0.013373	0.015237	0	0	0	0	0	0	0	0	0	0	0	0	0	0	0	NA	0	0	0.052949	0	NA	0.016969	0	0
MIR485_1	0	0	0	0	0	0	0	0	0	0	0	0	0	0	0	0.022864	0	0	0	0	0	0.023278	0	0	0	0	0	0	0	0	0	0	0.020148	0.129043	0	0	0.16641	0	NA	0.020806	0	0
MIR487A	0	0	0	0	0	0	0	0	0	0	0.006551	0	0	0	0	0	0.014737	0	0.001477	0	0	0	0	0.044058	0.007668	0	0	0	0	0.019116	0	NA	0.308942	NA	0	0	0	NA	NA	0.00448	0.012624	0.019111
MIR487A_1	0	0	0	0	0	0	0	0	0	0	0.019209	0	0	0	0	0	0.022127	0	0.012695	0	0	0	0	0.003441	0.022994	0	0	0	0	0.021026	0	NA	0.477456	NA	0	0	0	NA	NA	0.05108	0.014116	0.027974
MIR487B	0	0	0	0	0	0	0	0	0	0	0	0	0	0	0	0	0	0	0	0	0	0	0	0.007061	0	0	0	0.017344	0	0.005785	0	0	0	0.516171	NA	1.07044	NA	0	NA	0	0.003674	0.022174
MIR487B_1	0	0	0	0	0	0	0	0	0	0	0	0	0	0	0	0	0.005459	0	0	0	0	0	0	0.011592	0.026045	0	0	0.023499	0	0.047007	0	0	0	0.574827	NA	1.07044	NA	0	NA	0	0.013786	0.00422
MIR490	0	0	0	0	0	0	0	0	0	0	0	0	0	0	0	0	0	0	0	0	0	0	0	0	0	0	0	0	0	0	0	0	0	NA	1.6514	0	0	0	0	0.029955	0	0.020426
MIR491	0	0	0	0	0	0	0	0	0	0	0.02001	0	0	0	0	0	0	0	0	0.005143	0	0	0	0.018939	0	0	0	0	0	0.018171	NA	NA	NA	0.516171	NA	0.669025	0.854744	NA	0.721275	0.035551	0.013222	0.042208
MIR491_1	0	0	0	0	0	0	0	0	0	0	0.006348	0	0	0	0	0	0	0	0	0.016647	0.010077	0	0	0.01288	0	0	0	0	0	0.017897	0.006373	NA	NA	0.680408	NA	0.729845	0.862309	NA	0.800319	0.020156	0.020924	0.033028
MIR493	0	0	0	0	0	0	0	0	0	0	0.038063	0.016936	0	0.031897	0.021931	0.008632	0	0.011176	0	0.004352	0.02006	0.005498	0.017599	0.02463	0.036955	0	0	0	0	0	0	0	0.765335	NA	NA	0	NA	NA	0	0.044717	0.02695	0
MIR493_1	0	0	0	0	0	0	0	0	0	0	0.019939	0.024535	0.019543	0.031897	0	0.017437	0	0	0	0.026537	0.019278	0.028141	0.007866	0.035988	0.032828	0	0.023678	0	0	0	0	0	0.849592	0.610021	NA	0	NA	NA	0	0.019095	0.013582	0
MIR494	0	0	0	0	0	0	0	0	0	0	0	0.074775	0	0	0	0	0	0	0.063552	0	0.013621	0	0	0	0	0	0	0.111476	0	0.027531	0	0	0	0	0	NA	NA	0	0.326056	0	0	0
MIR495	0	0	0	0	0	0	0	0	0	0	0	0	0	0	0	0	0	0	0	0.022968	0	0	0	0	0	0	0	0.007928	0	0	0	0	0	0	0	0	0	0	0	0	0	0
MIR496	0	0	0	0	0	0	0	0	0	0	0	0	0	0	0	0.047306	0	0	0	0	0	0	0	0	0	0	0.046901	0	0.044517	0	0	0	0	0	0.151323	0	0	0	0.070645	0	8e-06	0
MIR496_1	0	0	0	0	0	0	0	0	0	0	0	0	0	0	0	0	0	0	0	0	0	0	0	0	0	0.03689	0	0	0	0	0	0	0	0	0.151323	0	0	0	0	0	0	0
MIR497	0	0	0	0	0	0	0	0	0	0	0	0	0	0	0	0	0	0	0	0	0	0	0	0	0	0	0	0	0	0	0	0	0	0	0	0	0	0	0	0	0	0
MIR497_1	0	0	0	0	0	0	0	0	0	0	0	0	0	0	0	0	0	0	0	0	0	0	0	0	0	0	0	0	0	0	0	0	0	0	0	0	0	0	0	0	0	0
MIR499	0	0	0	0	0	0	0	0	0	0	0	0	0	0	0	0	0.000206	0	0	0	0	0	0	0	0	0.004332	0.016833	0	0	0	0	0	NA	NA	0	0	0	0	0	0	0.016579	0
MIR499_1	0	0	0	0	0	0	0	0	0	0	0	0	0	0	0	0	0.022018	0	0.014788	0	0	0	0	0	0	0	0.02345	0	0	0	0	0	NA	NA	0	0	0	0	0	0	0.018788	0
MIR500	0	0	0	0	0	0	0	0	0	0	0	0	0	0	0	0	0	0	0	0	0	0	0	0	0	0	0	0	0	0	0	0	0	0	0	NA	0	0	0	0	0	0
MIR500_1	0	0	0	0	0	0	0	0	0	0	0	0	0	0	0	0	0	0	0	0	0	0	0	0	0	0	0	0	0	0	0.054866	0	0	0	0	NA	0	0	0	0	0	0
MIR502A	0	0	0	0	0	0	0	0	0	0	0	0	0	0	0	0.02503	0	0	0	0	0	0	0	0	0	0	0	0	0	0	0	0	0	0	0	0	0	0	0	0.020728	0	0
MIR502B	0	0	0	0	0	0	0	0	0	0	0	0	0	0	0	0	0	0	0	0	0	0	0	0	0	0	0	0	0	0	0	0	0	NA	NA	0	NA	0	0	0.085536	0	0.047201
MIR502B_1	0	0	0	0	0	0	0	0	0	0	0	0	0	0	0	0	0	0	0	0	0	0	0	0	0	0	0	0	0	0	0	0	0	NA	0.66032	0	NA	0	0	0	0	0.091122
MIR504	0	0	0	0	0	0	0	0	0	0	0	0	0	0	0	0	0	0	0	0	0	0	0	0	0	0	0	0	0	0	0	0	0	0	0	0	0	0	0	0	0	0
MIR505	0	0	0	0	0	0	0	0	0	0	0	0	0	0	0	0	0	0	0	0	0	0	0	0	0	0	0	0	0	0	0	0	0	NA	NA	NA	0	0	0	0	0	0
MIR532	0	0	0	0	0	0	0	0	0	0	0	0	0	0	0	0	0	0	0	0	0	0	0	0	0	0.074913	0	0	0.022237	0	0	0	NA	0	0	0	0	0	0	0.018907	0	0.028434
MIR532_1	0	0	0	0	0	0	0	0	0	0	0	0	0	0	0	0	0	0	0	0	0	0	0	0	0	0	0	0	0.000829	0	0	0	NA	0	0	0	0	0	0	0.027864	0	0
MIR542	0	0	0	0	0	0	0	0	0	0	0	0	0	0	0	0	0	0	0	0.053987	0	0	0.026184	0	0	0	0	0	0	0	0	0	0	NA	NA	0	0	0	0	0	0	0
MIR542_1	0	0	0	6.77333	0	0	0	0	0	0	0	0	0	0	0	0	0	0	0	0	0	0	0.009134	0	0.003044	0	0	0	0	0	0	0	0	NA	NA	0	0	0	0	0	0	0
MIR543	0	0	0	0	0	0	0	0	0	0	0	0	0	0	0	0	0.021094	0	0	0	0	0	0	0	0	0	0	0	0	0	0	0	0.089431	0	0	0	NA	NA	0	0	0	0
MIR543_1	0	0	0	0	0	0	0	0	0	0	0	0	0	0	0	0	0	0	0	0	0	0	0	0	0	0	0	0	0	0	0	0	0	0	0	0	NA	0	0	0	0.017877	0
MIR544	0	0	0	0	0	0	0	0	0	0	0	0	0.017464	0	0	0.015464	0	0	0	0	0.011595	0	0	0	0	0.030587	0.033936	0.050516	0.00878	0.014397	0	0	0	NA	0	0	0.328859	0.02802	0.341582	0.025831	0.012154	0
MIR545	0	0	0	0	0	0	0	0	0	0.038464	0.017606	0	0.015888	0	0.014485	0	0.010624	0.003461	0	0.016334	0.001731	0	0	0	0.043962	0.028051	0	0	0.008213	0.011712	NA	0.611591	0	1.16138	2.43559	NA	NA	0.588415	NA	0.016773	0.011376	0.012718
MIR545_1	0	0	0	0	0	0	0	0	0	0	0.001444	0	0.016579	0.034077	0.021732	0	0.025251	0.017617	0	0.017047	0.014335	0	0	0	0.014734	0.015864	0	0	0.029209	0.014254	NA	1.08766	0	1.11446	2.1598	0.814994	NA	0.48143	NA	0.026398	0.026595	0.035658
MIR582	0	0	0	0	0	0	0	0	0	0	0	0	0	0.012892	0.01277	0.021969	0	0	0	0	0	0	0	0	0	0.047155	0	0	0.009787	0	0	0	0	NA	1.01111	0	0.499231	NA	0.711395	0.035065	0.044638	0.015486
MIR592	0	0	0	0	0	0	0	0	0	0	0	0	0	0	0	0	0	0	0	0	0	0	0	0	0	0	0	0	0	0	0	0	0	0	0	0	0	0	0	0	0	0.024858
MIR628	0	0	0	0	0	0	0	0	0	0.031333	0.024497	0	0	0.005693	0.011779	0	0	0	0	0.146838	0.028494	0	0	0.021407	0.011219	0.037147	0.027693	0.043687	0.044206	0.009584	0.478551	0.322415	0.446623	2.32277	4.48707	1.25079	0.567966	NA	0.401663	0.016461	0.034263	0.045329
MIR655	0	0	0	0	0	0	0	0	0	0	0	0	0	0	0	0.016347	0.037307	0	8.1e-05	0	0	0.024584	0	0.015725	0.022993	0.033214	0	0	0	0.037079	0	0	NA	NA	NA	0	NA	0.071323	NA	0.029609	0.026168	0.028762
MIR656	0	0	0	0	0	0	0	0	0	0.025801	0.069439	0.040927	0.04256	0.014709	0	0.026353	0.019592	0	0	0.030572	0.020121	0	0.022957	0.021822	0.069491	0.038975	0	0.057802	0	0.035553	0	0	0	0	1.51323	NA	NA	NA	NA	0	0.066422	0
MIR660	0	0	0	0	0	0	0	0	0	0	0	0	0	0	0	0	0	0	0	0	0	0	0	0	0	0	0	0	0	0	0	0	0	0	0	NA	0	0	0	0	0.036007	0
MIR665	0	0	0	0	0	0	0	0	0	0.0177	0	0.020704	0	0.018229	0	0.026171	0.03053	0.011835	0.017015	0.014724	0.012315	0.119761	0.01169	0	0.073005	0.010711	0	0.00893	0	0.017156	NA	0	0	0	0	0	0	0.053939	0	0.03405	0	0
MIR671	0.16138	0.00367	0.017207	0.015576	0.009932	0.007992	0.010373	0.002057	0.008218	0.000742	0.000563	0.000569	0.000469	0.000739	0.000567	0.000838	0.00064	0.000492	0.000752	0.000537	0.000504	0.000893	0.000623	0.000867	0.001143	0.001084	0.00119	0.001613	0.000967	0.001304	0.000108	0.000117	0.000161	0.000174	0.000154	0.000179	0.000116	0.000127	0.000135	0.00076	0.000741	0.000868
MIR671_1	0.095316	0.003869	1.3e-05	0.071046	0.037967	0.167083	0.191403	0.020973	0.00474	0.000881	0.00058	0.000464	0.000642	0.000887	0.000737	0.000788	0.000833	0.000602	0.000837	0.000693	0.000673	0.000782	0.000597	0.001213	0.001259	0.001227	0.001589	0.001622	0.001062	0.001522	0.00016	9.4e-05	0.000148	0.00014	0.000171	0.000177	0.00013	0.000124	0.000151	0.000598	0.000808	0.000907
MIR7	0	0	0	0.34941	0	0	0	0	0	0.021524	0.03396	0.038763	0.023899	0.016905	0.023108	0.013041	0.02381	0.02933	0.027689	0.029572	0.007783	0.023923	0.022216	0.033253	0.037783	0.054265	0.046378	0.047143	0.027236	0.044887	0.614263	4.55053	2.31339	8.45538	17.5391	14.5593	4.73081	5.64131	3.36925	0.04353	0.029055	0.041614
MIR7_1	0	0	0	0	0	0	0.61943	0	0	0.01003	0.018393	0.019857	0.016179	0.007781	0.016672	0.015554	0.004357	0.0102	0.013825	0.020668	0.004287	0.026924	0.009959	0.020304	0.02813	0.03892	0.014171	0.032613	0.017084	0.023281	0.29503	4.64108	1.79895	6.86078	13.4047	12.4216	3.05779	4.4458	3.36925	0.018124	0.013518	0.024091
MIR708	0	0	0	0	0	0	0	0	0	0	0	0	0	0	0	0	0	0	0	0	0	0	0	0	0	0	0	0	0	0	0	NA	NA	NA	NA	0	0	0	NA	0	0.017606	0.0156
MIR708_1	0	0	0	0	0	0	0	0	0	0	0	0	0	0	0	0	0	0	0	0	0	0	0	0	0	0	0	0	0	0	0	0	NA	NA	0.296068	0	0	0	NA	0.097744	0.008686	0.034879
MIR758	0	0	0	0	0	0	0	0	0	0	0.002311	0.009687	0	0	0	0.022989	0.025192	0.010316	0.019665	0.027558	0	0	0	0.019904	0	0.02486	0	0.019844	0.048787	0.022264	0	0	0	NA	NA	NA	NA	NA	0.543427	0.034547	0.0121	0.014116
MIR767	0	0	0	0	0	0	0	0	0	0	0	0	0	0	0	0	0	0	0	0	0	0	0	0	0	0	0	0	0	0	0	0	0	0	0	0	0	0	0	0	0	0
MIR873	0	0	0	0	0	0	0	0	0	0	0	0	0	0	0	0	0	0	0	0	0	0	0	0	0	0	0	0	0	0	0	0	0	0	0	0	0	0	0	0	0	0
MIR873_1	0	0	0	0	0	0	0	0	0	0	0	0	0	0	0	0	0	0	0	0	0	0	0	0	0	0	0	0	0	0	0	0	0	0	0	0	0	0	0	0	0	0
MIR874	0	0	0	0	0	0	0	0	0	0.027072	0.009201	5e-05	0	0.010991	0	0	0	0.021259	0	0.021514	0	0.000352	0	0	0.021624	0.047535	0.012506	0.039496	0.000101	0.045688	NA	0	0.006799	0.359076	NA	1.44866	0	NA	0	0.007107	0.029472	0.019106
MIR874_1	0	0	0	0	0	0	0	2.96978	0	0.011488	0.01425	0.016484	0	0.031716	0	0	0	0.023299	0	0	0	0	0	0	0.020673	0.049863	0.016332	0.022977	0.041216	0.051597	NA	0	0	0.516171	NA	1.41381	0	NA	0	0.029431	0.010871	0.06338
MIR876	0	0	0	0	0	0	0	0	0	0	0	0	0	0	0	0	0	0	0	0	0	0	0	0	0	0	0	0	0	0	0	0	0	0	0	0	0	0	0	0	0	0
MIR876_1	0	0	0	0	0	0	0	0	0	0	0	0	0	0	0	0	0	0	0	0	0	0	0	0	0	0	0	0	0	0	0	0	0	0	0	0	0	0	0	0	0	0
MIR877	0	0	0	0	1.15774	0	0.008163	0	0	0.00738	0.009402	0.041895	0.000187	0	0.006024	0.007203	0.006371	0.052003	0	0	0.003082	0	0	0	0.000303	0.003953	0.00166	0.007021	0.006775	0.002362	NA	NA	0	NA	NA	NA	0.29518	0.434306	0.077632	0.065205	0.004804	0.019345
MIR877_1	0	0	0	0	0	0	0	0	0	0	0	0	0	0.141087	0	0	0	0	0	0.115999	0	0	0	0	0	0	0	0	0	0	0	0	0	0	0	0	0	0	0	0	0	0
MIR9	0	0	0	0	0	0	0	0	0	0	0	0	0	0	0	0	0	0	0	0	0	0	0	0	0	0	0	0	0	0	0	0	0	0	0	0	0	0	0	0	0	0
MIR9_1	0	0	0	0	0	0	0	0	0	0	0	0	0	0	0	0	0	0	0	0	0	0	0	0	0	0	0	0	0	0	0	0	0	0	0	0	0	0	0	0	0	0
MIR92A	0	0	0.007631	0	0.002706	0	0	0	0	0.00031	4.8e-05	4.1e-05	9e-06	0.000236	9.1e-05	0.000305	0	0	0.000144	0.000389	0.000141	9e-06	0.000855	0.000156	0.000233	0.008178	0.00073	0.00031	0.001425	0.000678	3e-06	8.7e-05	4.6e-05	4.2e-05	0.000147	8.8e-05	3.6e-05	3.4e-05	6.8e-05	6.7e-05	4.3e-05	0.000129
MIR92A_1	0	0	0	0	0.005337	0	0	0	0	0.000115	0.000697	0.000672	0.000213	0.000439	5.8e-05	0.000702	0.000346	0	0.000264	0.000385	0.000269	0.000303	0.000591	0.00063	0.000784	0.001133	0.00102	0.001	0.001042	0.001414	1e-06	9.2e-05	4.4e-05	3.7e-05	0.000141	8.5e-05	2.2e-05	2.8e-05	4.9e-05	0.000118	0.000117	0.000294
MIR92B	0	0	0	0	0	0	0	0	0	0	0.015544	0	0	0	0	0	0.042128	0.007308	0	0.170802	0	0	0	0	0	0	0	0	0	0	0	0	0	0	0	0	0	0	0	0.013601	0	0
MIR93	0	0	0	0	0	0	0	0	0	0.068017	0.047777	0.02375	0	0.026449	7.4e-05	0	0.018033	0.022674	0.011037	0.004732	0	0.050391	0.003797	0.037192	0.035889	0.003006	0	0.014125	0.021333	0.006216	0	0	NA	0.791089	1.21059	1.75693	0.332821	0.140708	0.217371	0.030303	0.037987	0
MIR93_1	0	0	0	0	0	0	0	0	0	0	0.03658	0.023646	0	0	0.002551	0	0.022282	0.022152	0.015546	0.004825	0	0.016664	0.005655	0.015716	0.074769	0.002054	0.076608	0.024373	0.041717	0.005129	0	0	NA	0.9033	1.11848	1.07044	0.144705	0.294207	0.538701	0.018156	0.039978	0.026812
MIR96	0	0	0	0	0	0	0	0	0	0	0	0	0	0	0	0	0	0	0	0	0	0	0	0	0	0	0	0	0	0	0	0	0	0	0	0	0	0	0	0	0	0
MIR98	0	0	0	0	0	0	0	0	0	0	0	0	0	0	0	0.020451	0	0	0	0.024737	0	0	0	0	0	0	0.018465	0	0	0.018136	0	NA	0	NA	2.5725	0	0.332821	NA	0.108685	0.019003	0.04821	0.006492
MIR98_1	0	0	0	0	0	0	0	0	0	0	0	0	0	0	0	0	0	0	0	0.014155	0	0.020108	0	0	0.026239	0.032053	0.018465	0	0.043332	0.028864	0	NA	0	0.140774	0.983602	NA	0.16641	NA	0.054343	0.00524	0.006242	0.016338
MIR99A	0	0	0	0	0	0	0	0	0	0	0.000352	0.000448	0	0	0	0	0	0	0	0.00035	0	0	0.000262	0	0	0	0	0	0	0	NA	NA	NA	1e-06	NA	NA	NA	0	NA	2e-05	6.7e-05	2.3e-05
MIR99A_1	0	0	0	0	0	0	0	0	0	0	0.000143	0.000963	0	0	0	0	0	0	0	0.000346	0	0	0	0	0	0	0	0	0	0	NA	NA	NA	1e-06	NA	NA	NA	0	NA	5.1e-05	0.00014	0.000125
MIR99B	0	0	1.32978	0	0	0	0	0	0	0.010625	0.013612	0.045861	0.104707	0.019553	0.011763	0.048344	0.016631	0.009833	0.006801	0	0.023343	0.030764	0.047976	0.013029	0.12138	0.067573	0.019238	0.043642	0.048542	0.041129	0.350531	0	NA	1.22004	1.81588	2.1409	0.298782	NA	0.558247	0.01572	0	0.078553
MIR99B_1	0	0	0	0	0	0	0	0	0	0.049679	0.0942	0.040616	0.026343	0.015199	0.001082	0.016388	0.021062	0.027071	0.037154	0.048837	0.034216	0.060576	0.021975	0.022159	0.055585	0.047854	0.022034	0.057093	0.036196	0.080294	0.350531	0	NA	1.16138	1.77048	2.1409	0.582437	NA	0.869483	5.6e-05	0	0.049905
MIRLET7A	0	0	0	0.659868	0	4.96535	0	0	0.907176	0.047089	0.02318	0.006174	0.005817	0.021315	0.037757	0.016752	0.003457	0.015343	0.002611	0.006457	0.003802	0.006137	0.02555	0.125203	0.060691	0.008314	0.187551	0.004614	0.018254	0.171613	NA	NA	0.386178	1.31976	1.08678	0.839322	0.16641	0.294207	0.217371	0.004883	0.003046	0.006108
MIRLET7A_1	0	0.16247	0.169991	0	0	0.450374	0	0.826796	0.000652	0	0.017215	0.027965	0.021054	0.019028	0.020259	0	0.034266	0.014697	0.013117	0.027624	0.011289	0.011225	0.018129	0.026087	0.050857	0.037742	0.03692	0.05828	0.049482	0.043934	0.280425	0.382244	0.386178	0.9033	0.756617	0.669025	0.16641	0.196138	0.217371	0.021032	0.025427	0.04128
MIRLET7B	0	0	0	0	0	0	0	0	0	0.447301	0.582498	0.057261	0.044915	0.12916	0.086334	0.246531	0.138733	0.048205	0.007598	0.426976	0.109475	0.233209	0.066913	0.231646	0.713708	2.31178	0.694968	0.3739	0.999152	0.778466	0.876327	1.09113	0.688099	2.37556	8.59792	5.75361	0.998463	2.35366	2.3812	0.029588	0.024379	0.03781
MIRLET7B_1	0	1.36086	0	12.4452	12.8522	2.67466	2.44364	0	0.718764	0.015418	0.032322	0.023348	0.025816	0.035652	0.033569	0.008349	0.036018	0.025183	0.035287	0.020785	0.015517	0.021514	0.035266	0.040391	0.065329	0.047423	0.052345	0.057904	0.043699	0.055314	0.541729	1.09113	0.695121	2.48114	8.254	7.04909	1.01737	1.422	1.82789	0.049338	0.048612	0.059515
MIRLET7C	0	0	0	0	0	0	0	0	0	0	0.000758	0	0	0	0	0	3e-06	0	0	0	0	0	0	0	0	0	0	0	0	0	0	NA	NA	1e-06	NA	NA	NA	0	NA	2.7e-05	3.8e-05	4.6e-05
MIRLET7C_1	0	0	0	0	0	0	0	0	0	0	0.000329	0	0	0	0	0	0.000371	0	0	0	0	0	0	0	3.5e-05	0	0	0	0	0	0	NA	NA	0	NA	NA	NA	0	NA	0.000204	0.000233	0.000406
MIRLET7D	0	0.005533	0	0.015846	0	0.011798	0	0	0	0.002687	0.000208	8.5e-05	0.000168	0.000128	0.003758	0.000302	0.000478	0.000273	0.000142	0.004873	0.000151	0.000252	0.002293	0.000416	0.008928	0.001798	0.002015	0.000541	0.000334	0.001709	5.9e-05	7e-05	4.9e-05	5.7e-05	0.000179	0.000176	3.6e-05	6.4e-05	6.9e-05	5.1e-05	5.8e-05	0.00011
MIRLET7D_1	0.005482	0	0	0.012714	0.002721	0	0	0	0	0.000565	0.000999	0.00039	0.000858	0.000521	0.000709	0.000553	0.000803	0.001252	0.000692	0.001005	0.000635	0.000242	0.000768	0.001042	0.001734	0.001713	0.001516	0.01004	0.001644	0.002205	5.8e-05	8.1e-05	5.2e-05	5.7e-05	0.000168	0.000179	3.6e-05	6.3e-05	8.2e-05	0.000233	0.000259	0.000277
MIRLET7E	0	0	0	0	0	0	0	0	0	0.007812	0.002188	0.00666	0.001709	0	0.006603	0.038808	0.000212	0	0.00825	0.010743	0.000685	0.015479	0.005963	0.012922	0.013542	0.011285	0.01499	0.113083	0.004181	0.004249	NA	0	0	NA	0.45397	1.20425	NA	NA	NA	0.011851	0.006572	0.003123
MIRLET7E_1	0	0	0	3.92064	0	0	0	0	0	0.009398	0.026069	0.019268	0.005916	0.017497	0.023109	0	0.029738	0	0.022518	0.013847	0.022584	0.040847	0.014341	0.005675	0.03301	0.035062	0.00143	0.025272	0.039473	0.043283	NA	0	0	NA	1.21059	1.52659	NA	NA	NA	0.025954	0.01459	0.037089
MIRLET7F	0	0	0	0	0	0	0	0	0	0	1.7e-05	1.6e-05	1.7e-05	0	2.3e-05	3e-06	0	0	0	7e-06	2.6e-05	3e-06	8e-06	1e-05	0	9.2e-05	0	6e-06	6e-06	0	2.6e-05	4.4e-05	1.6e-05	4.6e-05	7.5e-05	8.3e-05	3e-05	6.9e-05	7.4e-05	4.7e-05	1.7e-05	5.5e-05
MIRLET7F_1	0	2.7e-05	0	0	0.000172	0.000528	0	0	0	0	4.4e-05	1.5e-05	0	2.6e-05	0	0	0	0	1.7e-05	0.000112	3.5e-05	0	1.7e-05	0.000106	0	7.6e-05	4.6e-05	1.8e-05	1.5e-05	0	2.5e-05	5.1e-05	3e-05	6.2e-05	8.6e-05	9.6e-05	3.5e-05	7.3e-05	8.3e-05	0.000179	0.000106	0.000171
MIRLET7G	0	0	0	0	0.964652	0	0	0	0	0	0.005065	0	0	0	0	0.02086	0	0	0	0.004338	0.003655	0	0	0.03465	0.012571	0.005793	0.021679	0	0	0.015321	NA	0.549042	NA	NA	4.68415	1.47185	NA	NA	NA	0.051246	0.006278	0.043696
MIRLET7G_1	0	0	0	0	0.006604	0	0	0	0	0	0.015709	0	0	0	0	0	0	0	0	0.023712	0.015222	0	0.036198	0	0.024958	0.020971	0	0.098457	0	0.011831	0.242185	0.382244	0.235218	NA	2.48996	1.29548	0.037821	NA	NA	0.04699	0.033783	0.042487
MIRLET7I	0	0	0	0	1.52412	0	0	0	0	0.00643	0.003388	0.002065	0.007012	0.040406	0.002802	0.014179	0	0.043627	0.004068	0.009793	0.01257	0.01893	0.009034	0.00607	0.119573	0.020688	0.045412	0.050264	0.032865	0.055984	0.382397	NA	NA	1.50745	6.8577	8.17427	0.16641	NA	NA	0.00766	0.117836	0.005414
MIRLET7I_1	0	0	0	0	0	0.992036	0	0	0	0.009492	0.035291	0.025885	0.017085	0.022908	0.020592	0.023771	0	0	0.012175	0.018975	0.013644	0.006063	0.035095	0.025051	0.039403	0.067669	0.024172	0.060921	0.01842	0.029878	0.420637	0.396144	0.326496	1.12619	5.08997	5.63806	0.16641	0.098069	0.217371	0.032691	0.015647	0.040279
MSTRG.1.2	795.286	1275.1	745.563	2010.29	3109.37	3144.87	1587.74	1453.16	1649.23	897.678	1160.82	556.725	692.375	790.886	1094.01	1024.76	876.993	500.616	536.132	796.199	642.494	978.813	997.366	830.304	2061.89	2128.12	1446.64	1548.85	1561.66	1783.29	84.9278	51.801	21.9804	42.5108	165.323	60.8603	57.7272	233.948	48.2619	130.313	143.923	68.8783
MSTRG.1.3	0	0	0	0	0	0	0	0	0	0	0	0	0	0	0	0	0	0	0	0	0	0	0	0	0	0	436.529	0	0	0	195.392	271.054	143.052	280.801	245.184	212.541	163.129	0	254.897	0	0	78.9198
MSTRG.1.4	0	0	0	0	0	0	0	0	0	0	0	0	0	0	0	0	0	0	0	0	0	0	0	0	0	0	0	0	0	0	0	0	608.635	0	0	0	0	0	0	0	0	0
MSTRG.10003.1	15.7383	14.2722	0	38.2417	67.5634	52.8363	0	0	35.2839	11.9261	21.4062	4.15867	5.76044	10.6756	11.6202	6.68678	17.9187	10.183	6.83309	16.436	8.20617	9.85037	22.6517	27.9259	124.187	145.2	78.0499	77.322	67.8901	104.969	21.361	42.0661	37.3486	83.8314	84.7388	78.772	91.6265	111.387	123.192	32.064	11.7472	29.5013
MSTRG.10004.1	0	0.378003	0.152451	2.08494	2.21196	1.41675	1.30552	0.751971	0.829229	0.572048	1.23666	0.56715	0.374741	0.492152	0.39476	0.31862	0.461598	0.285339	0.280768	0.666173	0.299	0.319654	0.526998	0.669887	3.46351	4.07827	2.15228	2.25797	2.11665	2.5054	0.510109	0.628051	0.853684	6.32628	3.91303	3.3941	1.82342	2.72471	2.16373	2.0093	1.21026	3.57875
MSTRG.10005.1	0	0	0	0	0	0	0	0	0	0.034147	0.092073	0.018387	0.0397	0	0.115167	0.008159	0	0	0.024078	0	0	0.025956	0.136238	0.108677	0.121753	0.168234	0.189688	0.019735	0.264753	0.294957	0.002736	0	0	0	0.020097	0	0	0.027605	0	0.003059	0	0.00407
MSTRG.10005.2	0	0	0	0	0	0	0	0	0	0	0	0	0	0	0	0	0	0	0	0	0	0	0	0	0	0.086075	0	0	0	0	0	0.002382	0.011976	0	0.010813	0.00478	0.003467	0	0	0	0	0
MSTRG.10007.1	0	0	0	2.58245	2.53347	0	4.93404	0	0	1.27997	4.37507	1.62488	1.4101	2.25325	2.80811	2.26853	0	0.904854	0.899374	1.30447	1.97091	1.06623	1.1481	1.76381	6.45958	6.62517	5.05901	3.80764	5.28709	7.40589	0.503334	0.618238	0.6045	0.862245	1.57272	2.80083	1.43696	0.483564	1.77197	0.135837	0.077955	0.19742
MSTRG.10007.2	0	0	0	0	0.928956	0	0	0	0	0	0	0	0	0	0	0	0	0	0	0	0	0	0	0	0	0	0	0	0	0	0	0	0	0	0	0	0	3.57571	0	0	0	0
MSTRG.10007.3	0.489755	0.888229	0.379842	2.82163	2.0539	3.22342	0.768079	1.30608	1.09385	0.19138	0.221084	0.161254	0.059765	0.078032	0.169229	0.104241	0.698646	0.079321	0.297562	0.217535	0.151146	0.094568	0.208034	0.070941	0.514229	0.719535	0.617779	0.31261	0.291023	0.271737	0.351443	0.856874	1.39605	7.13798	5.05234	4.38104	2.91635	2.05511	4.54668	4.96361	4.12479	6.62972
MSTRG.10007.4	0	0	0	0	0	0	0	0	0	0	0	0	0	0	0	0	0	0	0	0	0	0	0	0	0	0	0	0	0	0	0	0	0	0	0	0	0	3.31634	0	0	0	0
MSTRG.10007.5	0	0	0.032841	0	0.104786	0	0.063884	0.099429	0	0.012888	0.021469	0.008937	0.003218	0.005966	0.002836	0.010734	0	0	0.00999	0.007623	0.017017	0	0.020513	0.00018	0	0.116129	0	0.020557	0.013416	0.035678	1.80318	0	0	0	4.65635	0	0	0	0	0	0	0
MSTRG.10008.4	0.832788	1.4365	0.663086	0.60277	0.814185	0.408634	1.20672	1.94803	0.96189	4.91715	5.64812	3.69491	4.54653	7.58343	8.77507	3.76178	4.03597	4.12796	4.4732	5.5849	5.71315	3.991	4.14017	7.21874	6.11596	8.5142	3.90537	3.5057	3.11176	5.73867	3.36535	2.9964	3.81024	1.82648	1.27048	0.70668	3.46495	6.75484	3.14843	8.93309	10.1494	4.35604
MSTRG.10016.2	0.980003	1.45652	0.342355	0.222974	0.309509	0.340291	0.792085	2.0938	1.25248	1.40281	1.11903	1.4971	1.30465	2.01358	2.01544	1.7518	0.980429	1.33994	1.35033	1.01535	1.99352	1.51145	1.58389	2.21059	0.531546	0.554062	0.974291	0.360028	0.883883	0.960946	0.083206	0.087185	0.119533	0.149486	0.245752	0.164796	0.996167	0.766198	3.25328	6.63598	6.80577	4.18949
MSTRG.10016.7	0	0	0	0	0	0	0	0	0	0.915628	3.87649	4.15656	3.46787	2.37085	2.93142	7.44784	0.862064	3.56327	1.57431	7.64223	2.39661	1.48313	3.47458	1.38391	1.39393	0.605157	1.842	0	0.564014	0	2.01368	2.74868	1.33107	0	0	0	4.11728	9.03985	3.21845	3.59334	3.26997	0.142713
MSTRG.10018.6	0	0	0	0	16.5009	0	0	0	0	0	0	0	0	0	0.001109	0	0	0	0	0.005918	0	0	0	0	0	0	0	0	0	0	0.002633	0	0	0.094326	0.096138	0.044858	0.03524	0.006699	0.06163	0.041146	0.017885	0.08204
MSTRG.10020.1	0.743942	0.824139	0.352409	2.97806	10.5384	8.34805	3.80016	1.03868	8.12975	0.581602	0.844076	0.159225	0.338023	0.330666	0.727259	0.224445	1.77296	0.341223	0.204104	1.02885	0.223698	0.790463	1.21901	0.358123	2.41569	5.85965	2.46991	2.23139	0.962887	4.67221	0.247546	0.378715	0.533944	1.96972	1.08248	8.29042	0.290407	0.521939	0.942709	1.80391	0.944254	4.40606
MSTRG.10020.2	0	0	0	0	0	0	0	0	0	0	0.260653	0	0.00485	0	0	0	0.264935	0	0	0	0.004253	0.470708	0.151031	0.128154	2.29787	0.860397	0	0.027074	0.185099	1.79716	0.220088	0.230638	0.315419	5.08412	4.3249	6.57159	0	0	0.166835	0.036973	0.225263	2.5271
MSTRG.10021.3	0	0	0	0	0	0	0	0	0	0	0	0	0	0	0	0	0	0	0	0	0	0	0	0	0	0	0	0	0	0	0	1.81355	0	0	6.10805	19.7766	0	3.71668	0	2.50463	3.00699	4.601
MSTRG.10023.1	0.677992	1.00329	0.595486	3.41272	3.46212	4.00857	2.62554	2.07967	2.45416	1.62603	1.64105	1.10116	1.60755	1.68293	1.89994	1.06461	1.25457	1.22865	1.19011	1.00866	0.522415	1.26219	0.532242	2.63973	6.21872	4.53481	3.28616	3.78846	2.746	5.65718	0.690275	0.694798	0.328844	1.18909	3.32676	4.3385	0.614938	0.506575	1.7003	4.12268	4.14465	4.11818
MSTRG.10023.2	0	0	0	0.260845	0.076339	0	0.240081	0	0	0	3.00322	0.776567	0	0	0	0.885655	0	0	0	1.55095	1.51366	0.043517	2.1569	0	0	0	2.56784	3.82503	6.08198	0	0	0	1.92984	5.94407	2.10313	0	5.5132	5.30143	6.24678	0	0	1.708
MSTRG.10025.1	0.525361	4.37578	2.00944	12.5859	11.7449	11.541	6.39989	5.58737	6.17102	0.357996	1.43948	0.215066	0.49378	0.505704	1.08993	0.390959	0.358492	0.207836	0.293235	0.50453	0.193065	0.175479	0.411968	0.23654	1.35488	1.90947	0.751863	1.64203	0.930051	1.82392	0.768637	0.630791	0.836541	4.44831	3.79715	4.75635	3.89646	3.28102	2.11511	1.44884	0.783887	4.42973
MSTRG.10027.1	0	0	0	0.32131	0.801659	0	0	6.07813	0.458888	0.005149	0	0	0	0	0	0	0	1.11471	0	2.38332	0	0	0.775287	0	0	3.4165	3.863	3.42882	0	0	0.061063	0.002115	0.039709	0.748155	0.057107	2.04469	0	0	1.54228	0.092629	0	1.59936
MSTRG.10027.12	0	0	0	0	0	0	0	0	0	0.795755	2.44707	0.423232	1.46473	0.965681	1.87146	0.904301	1.00446	0.625429	0.98408	1.07791	1.1236	1.48384	1.67259	3.11274	11.5875	6.93887	4.19182	8.20446	5.69385	8.57891	0.715703	0.810142	1.60232	2.79442	4.1271	5.77202	1.43714	2.46706	2.4466	0.17885	0.739038	0.532429
MSTRG.10027.13	7.5095	8.48146	4.32516	0	0	0	0	0	0	1.47629	1.40566	0.870996	2.34006	0.253253	0.807747	1.11141	1.62038	1.8952	1.25751	2.15463	0.482453	1.29494	1.10916	1.38579	1.66167	4.82524	5.16951	3.94802	1.18335	1.43268	0.450215	0.797893	0.901948	1.30554	1.61193	0.962853	1.39652	0.8015	3.12957	1.80445	0	0
MSTRG.10027.2	2.88168	4.28693	0.630228	7.57911	11.1597	14.4187	9.82844	0.20962	3.74701	0.210468	2.70115	0.91353	1.20129	0.899077	1.03222	0.526374	0.278342	0.20069	0.066221	0.042801	0.071022	1.79666	2.32571	0.259657	0.227888	0.396701	0.192763	1.29086	0.365356	0.475726	0.511149	0.051045	0.35271	0.804133	1.01395	1.43037	0.155224	0.204613	0.803145	1.97451	2.59308	0.23
MSTRG.10027.3	0	0	1.74916	15.913	1.54713	0	0	0.285957	3.08683	0.490973	2.54992	2.62099	2.44292	2.17625	1.48306	2.65257	0.993927	0.849923	1.72555	0.453432	0.741146	1.3101	1.35607	2.05319	3.85823	1.09442	2.67218	6.49025	2.45204	5.11462	0.562415	1.72368	0.097517	0.458571	2.25295	0	0.663841	0.331287	3.58297	2.41341	2.08605	0.713989
MSTRG.10027.4	0	0	0	1.38274	0	0	0	0	0	1.92884	3.62493	0	0.308421	0	1.02186	1.26388	1.35506	0.554921	0.563226	1.46505	0.415045	1.06995	0.876209	0	2.54322	2.54443	1.12163	2.36618	3.41582	3.14922	0	0	0	0.206737	0.373234	0.088335	0.180669	1.12498	1.73021	1.0219	0	2.1459
MSTRG.10027.5	0	0	0	0	0	0	0	0	0	2.30465	0.352421	0	0.140152	0.963395	1.80726	0.269512	1.99666	0.653619	1.57509	0.501923	1.87973	0	0.502156	3.12817	9.14591	4.25321	3.36936	2.53487	6.56487	6.43737	0.645492	1.15293	1.58174	6.95252	7.46685	9.29802	3.85398	4.26232	3.19027	0	0	3.28248
MSTRG.10029.3	0	0	0	0	0	0	0	0	0	3.26824	6.87733	2.38112	2.7216	2.71154	2.92396	3.29516	0.048028	0.269816	0	2.98667	2.54052	0.217923	0.372478	3.77738	13.4113	12.5782	10.7317	9.53931	7.43808	7.83064	4.04955	5.57916	5.77598	20.108	18.3665	15.1775	12.3794	12.403	14.7894	9.50287	8.77267	11.744
MSTRG.10030.1	4.09903	7.1182	3.20528	40.8586	35.6768	34.8793	36.5171	16.3622	27.8012	5.78314	26.7981	2.06352	3.13299	1.44053	2.70805	1.81446	8.30415	6.54997	2.9346	7.84177	1.67097	4.13194	14.344	7.62455	35.7497	21.4304	21.6636	55.6574	36.1003	28.3357	3.04114	1.29927	4.64028	13.9591	13.4249	36.3283	1.57842	3.77104	1.8694	2.93194	2.05064	5.81019
MSTRG.10035.1	1.36046	1.16933	1.2681	17.1477	14.8548	14.0787	10.2772	5.54629	6.93492	4.63221	15.2054	2.76593	4.42662	2.58567	5.09158	2.75998	4.46731	3.05486	2.41982	6.75505	2.16835	3.16306	8.12638	7.87667	38.1608	23.6277	25.8461	41.4198	37.9656	27.3198	2.06738	1.98904	2.40535	13.377	15.3218	19.0557	10.6406	9.92745	11.3476	3.96296	3.15959	8.31835
MSTRG.10038.1	8.34463	8.99441	4.53491	1.49695	1.8354	2.21423	5.33152	6.36524	4.20049	3.11705	5.48363	3.11617	3.2079	5.34759	2.19293	2.32866	3.50569	0.467939	2.22381	4.40041	1.90941	4.8544	2.06426	8.69906	1.67032	2.09662	4.51621	0	1.9253	3.40545	0.339158	0.862299	0.698381	1.16164	0.888058	0	2.4593	1.03093	0.894529	4.01268	4.97631	2.07526
MSTRG.10038.18	0	0	0	0	0	0	0	0	0	0.911887	0.876048	1.05897	1.09245	1.06668	3.29439	1.3552	1.2444	1.05999	1.9975	0.939033	2.40548	0.996859	0.562871	0.931282	0.810953	0.792958	0.583361	1.48262	0.107837	0.155009	2.10607	1.62522	2.9085	0	0.124524	0	1.06893	0.921593	0.556199	3.07419	2.98224	2.53749
MSTRG.10038.19	0	0	0	0	0	0	0	0	0	4.3626	6.31482	0	0	7.15431	2.12012	6.05279	4.90352	7.15359	0	0.810041	5.96259	0	3.21964	9.34145	0	0	1.30242	0.205693	0	0.168872	0.142653	0.345805	0.118127	0.002529	0	0	0.387489	0.167912	0.088528	6.9398	9.72763	0
MSTRG.10038.2	0	0	0	0	0	0	0	0	0	6.43974	1.04924	4.76611	6.2621	5.8934	10.9134	9.51481	5.38856	8.40744	6.77634	4.94529	6.45747	6.68062	6.1154	1.76667	2.25026	1.80561	0.729082	3.7659	1.06237	1.49842	2.60975	1.76293	1.46119	0	0	0	1.61676	2.47457	1.76894	4.46135	3.15147	1.9648
MSTRG.10038.20	0	0	0	0	0	0	0	0	0	0.094408	0.060573	0	0	0.161861	0.599395	0.142264	0.042663	0.397469	0	0.170469	0.639091	0	0.025793	0.051817	0	0	0.037896	0.078166	0	0.070392	0.047607	0.38336	0.144204	0.070401	0.050992	0	0.24016	0.081566	0.068454	0.820306	1.51065	0
MSTRG.10038.4	0	9.45211	0	1.7198	2.68594	1.28814	0	8.02202	0	0.707849	1.02358	1.83374	1.04682	0.32504	0.952	1.10115	0.744744	1.20544	1.04459	0.561745	0.35616	1.78328	0.770156	1.86682	0.624896	1.41938	0.400883	0	1.05708	0.385441	0.37337	0.120081	0.05328	0.005597	0.476012	0	0.068041	0.300221	0.976795	2.02869	2.21489	0.005139
MSTRG.10038.5	0	1.04272	0	0	0	0	0.373723	0	0.196677	0.535042	0.159318	0	0	0.158217	0.462583	0.380689	0.536412	0.183926	0	0.210634	0.17806	0	0.509199	0.869002	0	0	0.302897	0.605428	0	0.245443	0.075985	0.217138	0.153424	0.026151	0.09446	0	0.168653	0.530967	1.45632	0.696979	0.651569	0
MSTRG.10038.6	0	0	0.902383	0	0	0	0	3.33703	7.50358	0.828116	0.247351	2.75204	2.01151	0.607026	1.88938	0.612571	1.07717	0.283847	1.34483	1.64155	0.220942	2.49968	0.766455	1.8971	1.40206	1.37017	2.39216	0.785148	0.815262	0.478715	0.901735	0.636236	0.493129	0	0.024369	0.468514	1.58712	2.02217	1.83145	1.41894	1.20307	1.13716
MSTRG.10038.7	0	0	10.4357	0	0	0	0.781336	0	0	0.721515	0.113231	2.53792	2.5958	2.0952	2.20149	3.62575	1.08167	0.515995	1.62797	1.33675	1.0665	3.1672	1.2745	0.502224	0.63529	0.137253	0	0.445125	0	0.074446	3.12496	3.49035	2.38032	0	0	0	4.49548	0.96947	1.66451	0.914687	1.63806	1.74488
MSTRG.10038.8	0	0	0	0	0	0	0	0	0	0.748977	0.051914	0.449853	0.829222	0.508339	0.565111	0.664572	0.610798	0.064677	0.737483	0.372884	0.7966	0.978742	0.62809	0.304986	0.044086	0.057436	0.264895	0.058732	0.054783	0.152479	1.5879	1.59499	0.438598	0.033268	0.402776	0	0.848718	0.821169	0.97058	0.451093	1.18007	0.900775
MSTRG.10039.1	1.47138	1.09756	1.80193	0.196065	0	0	0.728378	1.71961	1.96723	6.15084	3.87948	6.15606	4.97935	6.6416	8.91224	6.6896	5.61247	6.50353	5.70157	4.59907	6.58862	7.60398	4.77769	6.3387	0.673806	1.14026	2.66683	1.07826	0.982752	1.43941	1.48308	2.21272	1.71085	0.159599	0.091603	0	1.43729	1.33518	0.961686	6.23224	8.62542	2.14593
MSTRG.10040.1	0	0	0	0	0	0	0	0	0	0	0.666511	0.248628	0	0.171474	0.351209	0.141155	0.256649	0.103548	0.010198	0	0.109029	0.043504	0.171419	0.318151	0.39909	0	0.465562	0.094435	0.524164	0.492857	1.37925	1.0017	0.775706	0.553072	1.43486	13.2596	0.346518	0.099697	0.215971	0.541117	0.251511	0.512944
MSTRG.10040.2	0	0	0	0	0	0	0	0	0	0	0	0	0	0	0	0	0	0	0	0	0	0	0	0	0	0	0	0	0	0	0	0	0	33.1212	0	0	0	0	0	0	0	0
MSTRG.10040.3	0	0	0	0	0	0	0	0	0	0	0	0	0	0	0	0	0	0	0	0	0	0	0	0	0	0	0	0	0	0	0	0	0	0	0	58.6762	0	0	0	0	0	0
MSTRG.10040.4	0	0	0	0	0	0	0	0	0	0	0	0	0	0	0	0	0	0	0	0	0	0	0	0	0	0	0	0	0	0	0	0	0	2.11175	0	0	0	0	0	0	1e-06	0
MSTRG.10040.5	0	0	0	0	0	0	0	0	0.010541	0	0	0	0	0	0	0	0	0	0	0	0	0	0	0	0.021458	0	0	0	0.265616	0	0	0	0	0	0.482231	5.18226	0.037539	0	0	0	0.038988	0
MSTRG.10040.7	0	0	0	0	0	0	0	0	0	2.08127	0	0	2.95343	0	0	0	0	0	1.37253	0	0	0	0	0	10.8275	0	6.50502	5.8926	15.9957	0	0	0	0	5.16576	11.8285	4.39194	2.06714	5.20332	4.12151	0	0.010139	0
MSTRG.10040.8	0.179981	0	0.239297	0	2.2286	2.57759	1.24248	0.533531	0.13557	1.82298	1.82914	1.12311	0.408582	0.640023	1.58831	0.487213	0.845161	0.56914	0.322195	0.661096	0.735066	0.475761	1.07431	0.606582	0.830891	2.37757	7.54438	4.81681	11.6592	2.60359	3.12229	14.2648	4.92748	7.0118	9.504	12.2027	2.38219	4.6521	9.52509	3.27449	2.97987	4.98503
MSTRG.10042.1	0.692042	1.63452	0.235377	9.94709	5.86966	5.49907	7.34207	2.51954	1.89256	1.30184	3.68557	0.484267	0.558277	0.99745	0.821038	0.788035	1.66727	0.604774	0.353614	1.33417	0.716212	0.549359	2.00473	1.925	6.76076	8.06852	8.09477	7.88814	4.90361	8.50682	0.14185	0.257216	0.410975	4.74968	4.85684	1.92015	1.36157	1.85386	1.63487	1.49979	1.36827	3.84226
MSTRG.10046.2	12.1432	12.4737	7.45248	92.2963	70.1243	68.7767	49.0257	27.5144	31.1055	8.01468	24.4056	5.95661	6.33457	8.67212	10.4425	7.39359	8.22352	5.12166	7.71653	7.98392	3.78642	5.61277	11.386	15.2356	44.1928	26.0669	27.1694	35.5956	30.5001	36.4621	1.94259	3.75644	4.50094	29.0862	23.5513	16.8894	13.6065	11.344	19.0179	13.8434	6.76478	24.4139
MSTRG.10053.1	0	0	0	0	0	0	0	0	0	26.975	81.8785	15.6167	24.4855	23.445	29.698	19.5853	41.4231	22.9762	20.3594	36.3834	23.3315	30.6151	51.3583	42.4757	163.847	100.129	111.39	173.168	145.421	131.205	24.3923	29.1634	26.2776	140.111	120.134	156.093	74.7747	68.9017	83.2497	29.7531	24.7157	47.0801
MSTRG.10061.1	1.65894	2.44422	1.31823	14.7895	12.8902	12.9515	6.65033	3.44489	4.28075	0.241091	1.21656	0.335113	0.494254	1.48082	1.44103	0.0609	1.76799	0.074495	0.112019	0.194947	0.24466	0.083933	0.431196	1.12738	5.60335	10.7164	4.87676	1.70757	7.29993	1.83283	0.716757	1.2494	1.08336	7.56878	5.36393	3.5213	3.73151	1.4875	1.29163	3.72627	2.41683	7.76349
MSTRG.10063.1	14.8429	34.6104	15.4769	44.4462	49.4687	47.6133	35.1732	23.4117	20.3106	8.54829	10.8882	11.9237	10.1376	10.5163	12.4552	22.1699	7.4972	8.54452	5.26722	8.89134	14.869	8.00802	6.65752	13.6521	42.0509	27.9512	42.6058	21.2672	39.2615	20.8031	5.61656	2.18478	8.30366	7.95704	25.9703	21.2233	4.7149	4.248	11.3111	15.5476	15.1535	11.4749
MSTRG.10063.2	0	0	0	0	0.488551	4.90376	0.785169	0	0	6.19544	7.41133	2.28893	1.53372	8.71234	4.12125	0	2.5449	3.89186	1.17755	6.37215	1.82776	6.87486	4.53343	7.95384	38.5732	12.017	35.9932	16.8184	24.763	18.5916	0.96982	1.42917	1.24364	9.4375	23.6425	4.17145	1.03749	3.05134	9.56293	4.08959	9.29339	4.90694
MSTRG.10063.3	0	0	0	0	0	0.13962	0	0	0	2.77793	39.7949	0	0	1.72477	0.925475	0.89699	0	1.82345	0.382549	2.32277	0	0	5.6436	9.89405	17.1127	24.2482	24.245	19.5405	75.3079	40.7268	2.0551	9.56126	4.60502	29.5521	12.9007	26.1225	0.126355	9.12883	3.41455	3.10352	7.86265	5.37672
MSTRG.10063.4	0	0	0	0	0	0	0	0	0	1.39097	4.39626	0	0	1.12014	0.611072	0	0	0.580091	0.149147	0.909587	0	0	3.49	4.8619	12.4884	7.84209	16.1029	13.901	11.1561	14.5612	0.672824	0.497138	0.761359	5.57261	11.5917	8.19659	0.132249	2.30789	1.5809	1.67352	3.63059	1.75741
MSTRG.10063.7	0	0	0	0	0	0	0	0	0	2.76667	0.106319	0.03057	0	0	0	0	0	0	0	0	0	0.160771	4.65861	0	0	11.083	6.61957	0	17.2938	0	2.07233	5.46443	1.72219	13.6833	12.7541	0	0	0	0	0	0	0
MSTRG.10065.1	0	0	0	0	0	0	0	0	0.221498	0.065433	0.147094	0.127679	0.028609	0.051323	0.087046	0.036324	0.265603	0.081418	0.088284	0.175098	0.369441	0.208896	0.310304	0.059491	0.486451	0.389008	0.294417	4.813	0.62739	4.57479	0.438609	1.61147	1.6097	4.53966	9.38097	9.90717	1.3655	3.2286	3.92115	5.11306	2.69155	7.77453
MSTRG.10066.1	1.53528	1.85019	1.07426	15.9117	13.2464	13.305	7.06853	4.11865	4.87106	3.47981	7.92293	3.28425	2.98982	3.16231	3.46972	2.88955	3.45215	2.29997	2.53452	4.46459	2.95392	2.98195	4.75527	5.79382	18.1546	3.20944	5.74119	4.77277	11.4979	15.0464	2.15846	2.07999	0.616326	3.57195	4.51911	26.2613	0.374636	1.09681	0.943047	6.73912	5.95886	10.1913
MSTRG.10068.4	5.12587	6.16506	2.19105	19.7379	12.7951	14.6111	10.0742	8.97371	1.57738	5.52141	6.83932	3.49415	3.95766	4.25025	3.36294	5.1392	4.80966	2.98572	4.10142	4.12728	3.39604	1.38859	4.20512	7.06086	11.8608	11.8443	11.1236	7.97385	7.90606	11.3502	0.516449	0.531101	0.681443	6.41604	7.63645	3.27134	3.58161	4.76932	10.2743	4.52537	4.57439	5.7615
MSTRG.10068.5	0	0	0	0	2.17313	0	0	0	0	0	2.89876	0.893002	0.23157	1.09618	3.34	0	1.6297	0.325504	0.364655	0.867497	1.08573	4.95316	2.01683	0.431647	2.10896	5.50863	4.53648	1.50156	2.96042	5.49996	3.31002	4.74448	3.86991	4.67076	0	5.97944	5.16579	1.60582	0	2.44637	1.39475	0.656413
MSTRG.10073.1	1.72897	4.0431	1.49781	14.1533	14.2208	17.4572	10.8462	6.00279	2.22141	5.9252	12.6985	3.34223	3.41506	2.73266	5.8864	0.034921	0.365293	2.59278	2.04564	6.57628	2.60992	3.09445	8.67444	4.69197	21.1776	22.9495	15.6676	22.2024	41.485	17.1497	0.12728	0.467919	1.79493	12.1134	9.15337	10.8156	1.283	4.06849	1.25872	5.85328	4.80048	8.6506
MSTRG.10073.2	0	0	0	0	0	0	0	0	0	0	0	0	0	0	0	0	0	0	0	0	0	0	0	0	0	0	0	0	0	0	0.687702	0	0	0	0	0	0	0	4.02099	0	0	0
MSTRG.10073.3	0	0	0	0	0	0	0	0	7.75773	0	9.177	0	0.015089	0.135827	0	3.7657	5.6185	0	0	0	0.012555	0	0.000494	0	11.4013	0.131106	3.0383	0.002938	0	0.075531	0.875491	1.65966	0.109513	0.749362	5.07151	4.07698	5.30484	4.01685	3.84094	0.471736	0.411365	0.706599
MSTRG.10073.6	0	0	0	0	0	0	0	0	0	0	0.009089	0.142386	0	0.151345	0	0.039017	0.184247	0.068648	0.114815	0.215745	0.121159	0.106644	0.033282	1.92482	0.039133	0.354652	0.482429	0.04915	0.047668	0.934119	0.043997	0	2.12285	1.12412	0.741513	0.261399	0.334737	0.320814	0.09465	4.29072	3.10915	1.37916
MSTRG.10074.1	15.6175	22.7906	17.9687	20.117	15.7871	17.1032	18.475	19.039	18.3751	3.17768	5.10005	2.23868	3.24686	4.08198	7.60058	3.88725	1.8933	2.15159	1.21704	2.97938	3.541	2.42422	4.97301	2.45071	4.54816	6.05893	2.96121	4.49092	2.42391	9.13427	0.893813	0.732194	0.960669	3.84789	3.10048	4.46329	1.10417	1.91283	1.54019	1.50198	5.11468	1.33684
MSTRG.10078.2	0.302363	0.378061	0.252071	0	0	3.02778	4.43389	0.925605	0.048166	0.94418	1.55749	0.332782	0.155624	0.18087	0.099075	0.689251	0.166185	0.206695	0.132564	0.834549	0.177947	0.082932	0.668581	0.686427	3.20408	1.87254	1.46279	2.41593	1.5033	1.31024	0.384686	1.16548	1.59242	4.05566	4.82059	2.05147	2.70478	6.41177	2.97303	0.51874	0.256542	1.21415
MSTRG.1008.1	0	0	0	2.07346	0	0	0	0	0	2.68589	5.57592	1.8277	3.01353	0.45332	2.38603	0	9.14925	0.270106	0	12.5689	2.26951	0.176176	4.09809	2.82525	14.7033	6.34927	0.09902	27.3536	0.175716	0.709851	0.045607	0.343746	4.82925	16.181	0.681466	12.6167	4.69538	3.65083	6.28858	3.18311	2.41149	12.4784
MSTRG.10080.1	0.547611	0.317219	0.514868	6.73693	5.00389	5.10785	2.75627	1.59651	1.58801	1.11641	2.36649	0.762422	1.68226	1.45551	1.17975	1.07666	1.71763	1.60507	1.46713	1.95891	1.56813	1.32845	2.06188	2.8703	5.9014	5.2877	4.24321	4.90761	4.22624	4.96652	0.76436	1.21899	0.905014	4.96341	5.60807	6.95268	2.59289	2.85817	7.83624	2.87341	2.1572	4.0708
MSTRG.10081.5	0	0	0	0	0	0	0	0	0	0.587106	1.43055	0.690564	0.197582	0.477781	1.64306	0.923071	0	0.382894	0.398832	2.01108	0.392858	1.24739	0.691593	1.78731	3.43342	6.49825	2.1795	4.2689	2.49629	5.51765	0.573035	0.50445	0.463364	4.28567	3.55616	5.03748	2.33949	1.02152	1.63802	0.889406	0	1.44584
MSTRG.10083.1	93.622	75.2038	82.6913	345.735	495.9	475.686	220.612	47.352	120.877	8.63221	17.4921	3.5353	7.00836	8.62845	9.68796	7.6186	9.62608	6.65	4.75974	9.90074	5.64581	7.57715	11.7282	18.5713	48.0836	60.9774	41.8505	35.8795	32.8224	41.215	0.404413	0.348411	0.511426	1.38263	1.69012	1.05281	2.07474	2.09065	2.01435	0.469972	0.820918	0.809195
MSTRG.10085.3	0.2568	0.098464	0	1.53969	1.22994	0.874305	1.01316	1.43793	0.935913	1.19816	1.18457	0.619668	0.302669	0.680176	0.337943	0.631623	1.80244	0	0.429721	0.281734	1.40011	0.536975	1.01819	0.734167	1.98454	1.9181	1.70757	2.56883	1.7519	2.33599	1.07838	0.712831	0.365765	2.29684	0.843831	4.4779	0.47437	0.997638	0.281537	2.69963	1.25323	0
MSTRG.10086.1	0	0	0.040809	0	1.2435	0	0	0.475911	0	0.405698	1.51909	1.11776	0.637561	0.199894	1.16942	0.223179	0.228565	0.533283	0.65934	0.644552	0.343412	0.453339	1.05095	0.695589	3.65734	1.81426	2.3279	2.39416	1.59939	1.7001	0.339464	0	1.22343	1.26451	2.32989	0.65923	4.1189	1.39124	3.62832	0.554746	0.458024	0.115707
MSTRG.10087.3	1.26383	2.45872	1.22316	6.79425	3.33926	6.15356	6.34042	2.82317	2.24736	2.16072	3.92832	1.25428	1.26876	1.06598	1.49589	2.05959	1.55088	1.21155	0.69617	2.49119	1.23017	1.52387	2.87769	2.5092	8.55596	7.5343	6.2099	8.67118	8.27414	7.60215	0.36467	0.489041	0.679016	5.26783	4.55244	3.8182	2.32544	2.38808	1.85303	2.33937	2.06413	3.08966
MSTRG.10088.2	0	0	0	1.38661	0	0	0.207665	0	0	0.930235	2.99756	1.69398	0.011734	0.346963	0.248209	2.41053	1.45894	1.4751	1.52922	2.14381	2.25475	2.14119	1.09617	2.36474	4.18695	6.70172	6.43795	4.9221	5.06304	6.97023	0.530084	0.263664	0.780108	3.17702	1.21925	2.23747	3.90311	3.98457	5.28301	0.488275	0.595124	0.22669
MSTRG.10091.9	0	0	0	0	0	0	0	0	0	0	2.25036	0	0	0	0	1.37318	0	0.377073	0	1.5118	1.22096	0	0	0.459905	1.79926	2.05153	2.53227	12.6305	0	7.13366	0	0	0	5.48667	4.06232	16.3601	6.06718	0.991535	0	0	0	3.39338
MSTRG.10096.1	0	1.77419	0.770641	2.14525	2.62471	0	1.99742	0.712484	1.3934	1.25424	2.92703	1.48885	1.39561	1.11742	1.95723	1.29132	1.99684	0.718045	0.864587	2.20201	0.834763	1.37989	2.06092	2.60675	6.61539	7.20948	4.93664	5.49476	4.47973	7.67133	0.908728	1.01964	0.6663	4.70255	5.96436	2.98897	3.08063	3.21031	3.89002	2.00259	1.31223	3.43653
MSTRG.101.6	0.207551	0.551335	0.120726	6.96709	4.27526	4.73834	3.43919	2.04753	2.53409	0.865445	2.23024	0.594027	0.41725	0.526668	0.779523	0.296666	0.65773	0.464339	0.34595	1.00401	0.386698	0.454481	0.767313	1.22581	6.48261	9.39172	2.95648	4.8803	3.53462	5.09308	0.264886	0.254282	0.405928	5.44814	4.14811	2.36699	0.507049	1.06247	1.01851	1.44793	0.653293	5.23991
MSTRG.10100.1	0	2.13524	1.39812	3.6136	1.91597	0	2.34865	2.25974	3.73141	0.123134	0.281798	0.059836	0.079916	0.083616	0.173518	0.101821	0.15907	0.099284	0.116976	0.175229	0.164687	0.102892	0.145218	0.400104	0.729307	0.772065	0.359953	0.526968	0.516793	0.616949	0.017999	0	0.021827	0.162383	0.320187	0	0.038019	3.01703	0.035176	0.031086	0.021403	0.114162
MSTRG.10100.4	1.53884	2.12945	1.56263	1.84178	4.14797	5.995	2.57087	2.04231	3.41545	1.98395	4.72119	1.61928	3.24005	1.90904	4.60621	0.566431	3.15576	0.814587	2.24849	4.32747	3.06782	1.92693	3.27387	4.38056	8.23428	10.782	6.90933	7.48641	5.67055	8.37655	0.262657	0.136723	0.148142	0.788043	1.17745	1.02107	4.05712	3.58439	2.61564	0.944281	1.55319	1.77605
MSTRG.10100.5	0	0	0	0	0	0	0	0	0	3.78249	4.07139	1.9963	3.16409	2.17334	4.3577	1.88679	1.80077	1.80173	3.8857	4.94377	2.15024	5.29431	3.33799	6.1785	12.6956	7.72696	11.4403	0	4.16317	8.03752	0.211943	0	0	0	7.49608	0	32.5735	11.4573	12.58	0	0	0
MSTRG.10101.2	0	0.094884	0	0	0	2.37561	0	0.144739	0.310762	0.131049	0.521159	0.181837	0.152003	0.256731	0.171599	0.641758	0.413879	0.431534	0.164091	0.581276	0.131565	0.215058	0.810495	0.11622	2.1404	1.9025	1.15474	0.527568	1.21474	0.831527	0.199922	0.392734	0.182628	0.6737	0.716464	1.20956	1.61169	1.61865	0.933011	0.147343	0.021801	0.084279
MSTRG.10104.1	0	0	0	0	0	0	0	0	0	0	0	0	0	0	0	0	0	0	0	0	0	0	0	0	0	0	0	0	0	0	0.743683	0.177621	0	8.20018	0	4.4285	0	9.47695	0	0	0	0
MSTRG.10104.3	0	0	0	0	0	0	0	0	0	0	0	0	0.708067	0.968319	2.38585	0	1.13567	0.391753	0	1.09468	0.197736	0.46791	0	0.527886	3.97478	0	1.28319	6.05707	5.34189	1.83982	0.891239	8.32251	11.9429	0	0.83009	4.17837	4.77355	2.43293	0	1.11084	0.452278	0
MSTRG.10104.4	0.772072	3.64655	2.53377	8.64954	11.9328	14.5908	5.6185	5.77994	6.98585	1.31049	2.86636	0.967688	0.78187	0.613741	1.57099	0.908327	1.10331	0.435338	1.23833	0.921783	0.893273	0.456397	1.59878	1.80579	4.32666	3.77312	1.19316	2.9274	2.08518	4.14727	2.23389	7.55391	7.3788	2.66746	6.31933	4.29246	4.80657	2.92281	11.3142	1.68213	2.55024	3.28082
MSTRG.10104.5	2.09294	0.688545	0.99899	3.71774	0.262165	0.571911	1.16284	0.630759	0.467936	2.31106	3.77229	2.06851	2.25927	2.12354	3.28029	1.22994	2.28034	1.45284	1.72825	1.85953	2.94388	2.27551	2.00198	3.49122	9.1115	5.32689	7.04203	5.58986	7.82834	7.43389	2.1538	4.68987	2.9812	3.83447	2.79263	2.32222	1.62939	2.42125	2.06159	4.84452	4.37049	3.5628
MSTRG.10105.4	3.25395	5.7992	5.14942	21.6883	23.5839	15.8985	11.8353	13.8664	9.25997	3.43718	4.75888	4.95765	3.0866	3.26481	4.82462	4.45907	4.89034	5.28294	6.47485	5.65348	3.32297	7.86433	7.02013	7.71327	9.44596	12.9304	12.6002	7.07346	9.01899	8.99037	1.2284	1.22101	1.32624	9.64545	4.52629	4.61291	2.81588	2.43745	1.53762	2.44708	2.72588	5.1622
MSTRG.10105.5	1.11266	0.974522	1.16902	11.8317	5.61096	9.50473	9.28435	1.76653	1.39502	5.00537	4.73891	10.1886	3.75658	5.18507	6.01758	8.80288	3.61346	3.91365	6.22382	5.16645	4.87364	7.03203	5.55963	12.6914	6.66798	11.6109	9.45495	4.05008	6.58937	8.24194	0.610062	0.814429	0.595035	8.75739	4.58469	3.17347	1.27923	2.05154	0.996234	4.20217	5.3832	5.95847
MSTRG.10107.1	13.1964	10.7338	0.536311	21.1013	24.5849	17.487	0.466516	2.11033	9.37874	5.4108	17.9541	13.2721	14.7398	4.3402	19.5733	3.28613	12.2995	13.3151	12.1078	16.2717	7.55355	18.6439	17.2117	22.6937	29.0215	30.3182	29.2107	28.9306	37.2759	22.8464	2.42785	1.14407	2.19252	7.43609	4.97134	3.57994	16.6064	10.1508	3.00384	4.55833	2.72284	5.07095
MSTRG.10108.1	0	0	0	0	0	0	0	0	0	0.079042	0	0.097262	0	0	0.465997	0.161104	0.183227	0.042026	0.018493	0.136702	0	0.222834	0.016053	0.324544	0.820396	0.867702	0.416903	0.421396	0.480316	0.153504	0	0.11702	0.11084	2.4106	1.46633	1.24999	0.211677	2.50634	1.00368	0.475814	0.484716	0
MSTRG.1011.1	0	0	0	0	0	0	0	0	0	0	0	0	0	0	0	0	0	0	0	0	0	0	0	0	0	0	0	0	0	0	0	0	0	0	124.547	0	0	0	0	0	0	0
MSTRG.1011.2	227.849	1138.03	0	0	24.8793	0	0	579.704	0	1.07715	19.3836	64.9065	6.41966	5.31586	6.53669	165.575	7.2145	5.38917	136.097	110.564	174.112	6.36319	14.2357	392.164	842.895	1473.01	1298.46	339.559	269.609	612.836	4.27439	95.6215	133.642	251.327	44.2626	320.976	456.315	288.932	638.793	1.22926	2.07197	233.484
MSTRG.1011.3	0	0	0	0	0	0	0	0	0	0	0	0	0	0	0	0	0	0	7.32006	0	0	0	0	0	0	0	0	0	560.978	0	84.0813	0	0	0	0	280.067	0	0	259.214	0	0	0
MSTRG.10110.1	0.01178	0.238975	0.152267	0.361729	0.859213	0.584728	0.439343	0.345504	0.591507	0.199587	0.283701	0.244912	0.174919	0.312609	0.263067	0.212649	0.300773	0.15403	0.251874	0.340914	0.262021	0.26089	0.329884	0.389889	1.24472	1.21727	1.11872	0.920709	1.01444	1.68846	0.630283	0.899827	0.620519	3.36309	6.63804	3.46657	1.26274	1.69568	2.50736	1.11184	1.1935	2.27061
MSTRG.10114.4	0	0	0	0	0	0	0	0	0	12.09	39.3478	1.47213	1.94936	11.6745	14.5444	3.30613	17.4414	15.6926	6.98363	17.0365	6.04188	1.60866	4.20836	4.9225	113.296	69.6388	37.8375	75.7667	66.694	72.7361	0	2.06849	0.195611	12.1735	30.8028	23.3538	1.51492	6.88832	4.19511	1.50795	0.608416	7.41927
MSTRG.10117.1	0	0	0	0.186374	0.21105	0.143831	0.12917	0	0.043711	0.834408	0.984798	0.840662	0.864608	0.683848	0.653203	0.72631	0.579723	0.434208	0.547572	0.908098	0.76214	0.805656	1.24728	0.976351	2.00935	3.5214	1.20491	0.831211	1.69425	3.03236	0.386145	0.754979	0.383516	2.27977	3.29665	2.42499	0.448109	0.694845	0.711566	1.76199	2.19661	2.86257
MSTRG.10117.2	0.213764	0.395845	0.482814	0	0	0.319777	0	0.422502	0.257405	2.01531	2.96334	2.66257	2.02307	1.72924	2.61642	2.08031	2.22799	1.17644	2.00319	2.82243	1.79101	2.08999	3.47139	3.04332	5.40369	8.95251	4.85137	2.80474	5.22276	7.73466	0.794784	1.21279	1.2814	4.43096	5.56459	3.09105	1.30753	1.33331	1.9046	5.92473	5.59512	7.11096
MSTRG.10117.3	0	0	0	1.47707	1.04107	0.76664	0.800241	0	0	0	0	0	0	0	0	0	0	0	0	0	0	0	0	0	0	0	0	0	0	0	0.244495	0.510384	0.292031	0	2.7514	2.43923	0	0	0	0	0	0
MSTRG.10118.1	0	0	0	0	0	0	0	0	0	0.722129	2.14863	0.622371	0.825376	0.613877	0.667833	0.916877	1.17177	0.719799	0.56574	0.738895	0.734453	0.324277	1.71204	1.72273	3.86944	4.04989	2.96371	4.43233	3.06303	4.56406	1.49395	0.996219	0.485072	3.15685	1.95192	2.96931	1.33648	1.69479	3.02638	0.570946	0.822719	2.4586
MSTRG.10118.2	0	2.00998	0	0	0	4.54012	14.5972	0	0	0.975081	3.99022	2.10986	1.54	1.34569	3.01386	3.10086	2.8827	3.28352	2.64063	1.92743	1.69915	3.99417	2.10934	3.91509	4.22999	5.01424	5.47688	7.09994	4.20281	6.39997	2.78113	2.51135	3.45681	2.59776	3.49841	7.18485	4.20278	3.461	8.30463	1.51911	2.93621	1.06279
MSTRG.10118.3	0	0	0	15.9931	0	0	0	0.482961	0	5.419	5.59574	0.815597	1.49679	7.01028	5.20063	1.31984	2.57644	1.10276	0.774227	5.67674	1.93525	1.8602	6.87895	5.62782	22.8697	14.1456	16.311	18.6161	19.2727	24.11	9.60701	8.27315	11.4685	9.31317	22.5723	14.2602	7.38054	8.91107	6.05585	5.87992	5.76356	4.92433
MSTRG.10118.4	0	0	0	0	11.2282	0	0	0	0	1.52122	1.68927	0.264156	0.507351	0.514639	0.451779	0.414777	1.4114	0.570395	0.371924	1.00977	0.931962	0.288635	2.54787	0.966377	2.0841	2.97258	2.80064	2.37392	2.98493	2.87824	1.04888	0.820635	1.05993	1.62619	3.2803	3.08966	0.944469	2.06833	2.38113	1.11886	1.29614	1.62928
MSTRG.10126.1	0	9.67384	1.64277	5.47196	5.21608	0.495318	6.6326	7.4426	11.8129	2.70111	2.64214	4.09768	3.7812	5.88325	4.03259	4.77678	3.83848	3.65994	3.09321	3.59486	4.03554	3.27619	5.14456	3.61638	6.63357	6.10103	6.65751	4.07446	7.55117	10.8684	3.35749	1.68782	2.35876	2.12939	4.13618	3.90394	2.56739	2.22844	3.50496	2.23497	2.22017	2.4588
MSTRG.10128.1	0	0	0	0.181365	0.088093	0.864287	0.077198	0.396025	0.049737	0.094633	0.254955	0.072875	0.046835	0.195867	0	0.148841	0	0	0.093012	0.336009	0.045324	0.03747	0.218457	0.123864	0.80265	0.691384	0.210351	0.928301	0.702026	0.417195	0.199151	0	0	4.55787	2.54927	0.498895	0.501479	0	0.52459	1.61631	0.700331	2.61998
MSTRG.10128.2	0	0.021019	0.021567	0.16898	0.119134	0.077219	0.063572	0.054711	0.011951	0.027644	0.034272	0.028337	0.01365	0.012222	0.010856	0.020186	0.04412	0.024171	0.021598	0.04944	0.030961	0.051479	0.045161	0.041619	0.091519	0.67931	0.086484	0.069226	0.069804	0.268955	0.187407	0.260569	0.290601	5.33532	2.67383	1.85012	0.627656	0.781143	0.513941	1.86957	0.579435	5.19607
MSTRG.10128.3	0	0	0	0.222814	1.98701	0	0.845773	0	0	0.156204	0.220172	0.176299	0.034921	0.102579	0.105204	0.062773	0.313505	0.214229	0.055579	0.289627	0.073789	0.083356	0.218761	0.305319	0.812065	0.321703	0.237692	0.697027	0.35371	0.403698	0.124968	0.044628	0.302108	3.7905	1.77027	0.962363	0.71479	0.790815	0.43893	0.097126	0.078294	0.127725
MSTRG.10128.4	0	0	0	0.895914	1.1163	0.574808	0.296362	0.418742	0	0	0.054235	0.018582	0	0.004248	0	0.021596	0.012487	0.011632	0.012629	0.003031	0.007545	0.010779	0.029264	0.020193	0.126633	0.076258	0.022263	0.084165	0.075793	0.054036	0.047689	0.041627	0.206304	1.18783	3.50549	0.64653	0.608812	0.475406	0.215527	0.030485	0.065831	0.092325
MSTRG.10128.5	0	0	0	0	0	0	0	0	0	0.295134	0.359426	0.137105	0	0	0.174237	0	0.538443	0.154594	0	0.258485	0.089949	0.167332	0.336392	0.525699	1.28035	2.13288	0.431939	1.32146	0.511861	1.14875	0.154795	0.20412	0.287682	3.32697	2.28728	1.74239	0.198555	0.469365	0.309108	0.058245	0	0
MSTRG.10128.7	0	0	0	1.38795	0.396793	0	1.34737	0	0.32567	0.347634	0.435837	0.118681	0.227669	0.107932	0.287073	0	0.425588	0.115222	0	0.143238	0.194088	0.196639	0.08607	0.495471	1.62237	5.17489	1.18668	1.08232	1.66431	2.30509	0.08446	0.340435	0.468988	3.24351	2.07215	2.27505	0.407587	0.949937	0	0	0	3.04173
MSTRG.10131.1	0.092019	0.122057	0.033127	0.268776	0.119074	0.261599	0.164712	0.118753	0.126261	0.121702	0.189637	0.180971	0.106578	0.15979	0.139992	0.401487	0.08979	0.10568	0.144467	0.164791	0.113026	0.117321	0.186978	0.163615	0.469186	0.600059	0.370959	0.205439	0.310559	0.720758	0.208264	0.374219	0.422623	3.57647	2.6261	2.46857	2.7039	1.68239	1.50481	4.97109	5.31155	4.57703
MSTRG.10132.2	0	0	0	0	0	0	0	0	0	2.99271	3.06665	0.249919	1.19351	1.4484	0	1.25731	0.726286	0	0	1.2784	0.095261	0	4.96734	6.66693	0.980974	1.5707	0	20.51	16.4715	11.2621	0	0	0.399764	2.10602	0.954657	4.0795	0.917152	3.8121	0.361868	0	0	0
MSTRG.10138.1	1.51013	3.53177	1.3159	46.6446	14.9949	17.1765	20.4513	6.93865	8.23734	1.89527	6.13634	1.4972	2.18054	1.03615	2.07596	1.51003	3.74656	2.55345	1.75286	4.77862	2.31989	2.37901	6.27412	4.0561	16.5263	17.2672	8.85265	17.1716	12.8432	13.7335	0.416782	0.480175	0.776709	5.57703	3.32653	3.34585	1.68462	2.29329	1.32346	1.32255	1.43832	2.68849
MSTRG.10143.2	1.21822	4.42934	7.28089	16.962	6.09447	10.8036	12.9619	7.31972	1.41117	5.79068	15.1565	5.68348	8.90744	2.71421	9.34035	7.36687	8.59799	4.69135	5.79684	9.21636	6.4285	5.27111	14.2409	12.8279	32.2268	14.975	24.8332	26.744	27.386	30.4753	4.29758	6.71291	3.7532	8.72353	12.1486	12.4174	10.2703	15.5419	18.7379	2.45778	1.67232	2.97305
MSTRG.10146.1	2.63083	2.24246	2.08883	7.88012	10.5763	7.8541	3.21795	2.33899	4.15775	2.09853	2.71951	1.51205	1.43601	1.73665	1.88981	1.90319	2.39547	1.32207	0.939096	1.8813	1.1716	1.28557	2.6942	2.75833	8.06851	6.05485	4.37067	6.63039	6.62621	6.13607	0.839009	0.722324	1.01761	3.79564	5.41063	4.19088	2.74347	3.19819	6.03145	2.03978	1.56503	2.19376
MSTRG.10148.1	0	1.15626	0.779011	8.52753	5.49355	10.7948	5.30809	4.34912	4.75944	6.59054	11.3474	2.96181	4.40721	10.8866	1.90652	3.57802	14.6705	6.16511	4.11619	8.97069	4.90461	3.0161	12.5248	10.9794	30.0629	19.2253	19.9431	21.7986	14.5459	23.4769	0.804056	0.775989	0.478541	3.18349	4.21637	9.35659	2.05091	2.21024	1.51185	2.30855	2.79607	4.6893
MSTRG.10152.4	0	0	0	0	0	0	0	0	0	0.435727	0.70951	0.886959	0.530359	0.208983	0.372024	0.21733	0.066478	0.304248	0	1.39412	0.060943	0.221411	7.93171	0.864398	0.655432	16.1649	2.68028	0.10442	1.29977	0.230395	0	0.566701	0.876991	2.02904	1.28642	6.58206	0	0.078233	1.30521	0.153869	0	0
MSTRG.10154.1	0	0	0	0	0	0	0	0	0	1.60156	4.16813	3.42906	1.43587	0	0	4.20665	0.634797	1.13467	0.457979	0	2.95073	1.083	1.70478	0	7.18931	4.86309	3.32235	3.58002	0	9.0948	0	0.597363	0.082291	2.70561	2.1399	0.339724	0.582693	0.501472	1.35363	0.136739	0	0.579214
MSTRG.10155.1	1.09993	3.49719	1.47113	10.675	7.67922	8.33083	3.38936	3.16408	7.12455	1.84454	3.70868	1.47624	1.49856	1.72327	1.28499	1.60747	3.90117	1.86259	1.35705	1.64259	1.81388	1.67875	5.08576	2.01396	7.31953	3.71148	5.68212	6.5495	4.5244	4.95246	0.358422	0.702562	0.670968	2.09385	2.63914	5.40761	1.2838	2.22762	1.80361	1.27465	1.45171	1.74092
MSTRG.10158.1	6.56118	10.7344	7.58741	20.4363	31.1231	26.3403	21.3279	13.0805	1.92187	0.985796	2.59562	1.83828	0.914516	0.662558	1.41203	1.4573	1.2373	0.720471	1.67707	1.58244	0.957083	1.83107	2.39715	2.50922	9.86509	4.00529	2.31624	4.23368	9.39519	9.83533	0.233605	0.080197	0.334162	5.26532	1.81707	1.40111	1.11419	7.11898	2.82133	3.66334	1.6938	1.54773
MSTRG.10158.2	0	0	0	0	0	0	0	0	0	0	0	0	0	0	0	0	0	0	0	0	0	0	0	0	0	0	0	0	2.5914	4.02361	0	0	0	3.54093	0	0	0	6.07993	6.62678	1.81863	0.457638	0.387738
MSTRG.10158.3	0	4.01881	0	6.29973	4.61704	0	3.04233	0	0	0.133758	0.056106	0.094192	0.352668	0.053108	0.093804	0.362011	0.043219	0	0.132938	0	0.023788	0.087705	2.45232	0.109899	0.950232	0.117432	1.98778	0.576176	0.262199	0.785424	0	0.177183	0	3.71908	0.555756	0	0.023059	3.38481	2.90941	0.513563	1.5106	0.92618
MSTRG.10159.2	4.76087	7.61168	6.31855	0	15.7447	0	14.6303	0	2.56134	0.760962	22.4232	0.560345	1.13237	0.265759	8.47578	0.239329	1.42084	0.186629	2.38045	2.73397	2.03365	2.5306	1.28065	3.65519	8.53551	31.3622	37.3254	5.80349	78.8458	25.7743	1.52783	0.08896	0.233348	4.03664	4.25695	4.19111	2.70813	2.71154	4.11513	0.499565	0.556213	8.30345
MSTRG.10160.1	0	0	0	0	1.13416	2.12528	1.60062	0	0	1.28937	3.8222	0.938458	1.28572	0.996	1.46184	1.07466	1.48692	1.33569	0.577267	2.5076	0.807629	1.48888	4.42284	2.39355	7.99784	6.6467	5.01679	13.7676	7.34246	8.40189	0.352915	0.459177	0.476839	5.67633	4.31953	6.87895	1.35154	1.43579	1.94968	1.86855	1.44346	4.53211
MSTRG.10161.1	2.07644	5.52414	0.369962	3.36975	14.8797	20.6983	1.81961	4.82263	1.39683	0.811997	2.85121	1.102	5.41758	1.35017	0.691005	1.00132	0.914282	1.12079	3.34911	1.23973	0.516828	0.965328	2.34388	1.18196	4.61453	3.38687	2.46027	5.28275	2.92592	4.77841	3.3126	1.61715	3.14019	12.7766	6.23389	30.931	2.04956	1.97483	11.4154	1.98964	0.689106	1.65135
MSTRG.10165.1	0	0	0	0	0	0	5.50884	0	0	1.9765	3.97822	2.32913	1.50707	1.02468	3.35515	1.22004	3.43028	1.39251	0	3.8921	1.4145	1.80255	3.92358	4.10567	7.69038	3.15485	5.14192	5.71781	5.11777	5.17779	0.540574	1.2674	0.789097	3.95548	0.039179	1.595	1.81286	0.029549	4.00125	2.93188	0.09693	1.3374
MSTRG.10168.1	0	0.347738	0.234522	1.06959	2.24059	2.07815	0.957335	0.29894	1.20614	0.25265	0.395757	0.233993	0.553528	0.179243	0.583885	0.178916	0.626416	0.128674	0.304071	0.492066	0.19288	0.120196	0.583833	0.412571	1.7789	2.19003	1.02133	2.81754	0.684225	2.29282	0.177221	0.120044	0.242087	3.22832	1.12404	2.1301	0.114811	0.158846	0.702498	0.216583	0.096383	0.816279
MSTRG.10171.1	0	0.59529	0	0	4.35791	13.1762	6.16139	4.19695	3.58916	1.14371	3.10474	1.42592	1.56202	0.417954	1.6213	0.572019	2.34826	1.50224	0.98582	1.94601	0.650768	0.803189	1.60011	2.24655	7.10039	7.12166	3.87351	5.14967	5.47658	5.13893	0.131494	0.382627	0.249936	1.11126	14.6259	0.623481	0.929418	0.816471	0.408634	0.595695	0.120815	1.22976
MSTRG.10172.4	0	0	11.5946	0	8.69029	0	8.33254	0	0	0.841898	9.0617	2.46845	2.14133	0.348171	1.79159	4.67258	6.12912	2.36354	2.97429	3.58561	2.44987	2.37179	6.26832	1.54177	7.58986	9.55827	7.03544	7.63903	11.5655	4.94795	1.61475	0.169556	2.02958	6.40128	5.04129	3.64999	3.20822	2.59998	4.30981	0.122607	1.989	9.40301
MSTRG.10172.5	0	0	0	0	0	0	0	0	0	0	0	1.07287	0.907564	1.39541	0.310417	0	0.986501	0	0.749194	0.406928	1.74595	0	0	0.948866	6.85202	0	1.05817	7.12314	2.80184	0	0.737393	1.19322	3.79833	8.60668	0	0	0	0.966687	0	0.702569	0.533154	6.63458
MSTRG.10176.1	1.13756	0.706005	1.80677	0	5.3212	3.08475	2.04287	0	3.28763	3.11541	5.72432	3.06224	2.57574	2.16527	3.4234	2.67338	3.88078	1.70665	2.24461	4.9842	2.0417	2.88653	6.00641	5.34479	13.9188	10.8204	7.73713	9.2246	11.1709	10.6328	0.532614	0.828282	0.684544	3.73565	2.4672	1.89784	2.12708	2.74145	1.44194	2.20135	1.67021	2.13246
MSTRG.10178.1	0	0	0	0.455778	0	0.138798	0	0	0	2.61551	6.19754	2.69918	2.63826	3.02845	2.99546	2.86326	3.64659	1.96278	2.07249	3.74415	2.72776	1.72684	6.17976	6.49843	16.458	11.3292	14.0948	14.4099	13.0281	8.99819	1.52227	0.996164	1.43135	8.15391	8.4479	11.4905	6.07018	7.79075	4.97928	1.68256	1.03438	3.425
MSTRG.10179.1	26.3922	38.7297	143.559	1481.36	1093.89	1044.57	365.468	179.964	7.31112	16.21	917.755	139.01	158.015	21.8326	70.5477	75.4003	41.6358	222.97	52.6081	1042.53	32.4084	232.113	133.302	0.498103	512.503	892.418	148.571	706.942	256.852	332.908	14.7272	106.954	111.851	817.983	466.378	642.882	49.7069	0	33.4797	202.736	167.814	2957.19
MSTRG.10179.10	0	0	0	0	0	0	0	0	0	7.92681	108.418	0	0	0	0	0	0	0	0	0	0	0	34.83	0	0	305.566	0	0	0	0	33.8694	0	0.040466	96.3204	43.912	0	0	3.24561	0	0.054778	0	5.11973
MSTRG.10179.11	45.6378	76.7657	102.566	2606.18	1129.97	1199.48	369.316	148.381	38.2028	32.2826	531.032	60.4613	66.1571	20.564	43.1621	51.1469	137.327	118.438	65.7228	207.618	21.8758	138.406	90.8932	156.242	459.642	557.423	86.2515	703.936	301.724	227.134	68.5285	28.2384	0.602742	190.967	0	66.1277	0	21.659	6.20482	91.2554	62.9016	382.825
MSTRG.10179.12	0	95.0293	0	0	0	0	0	0	0	0.011972	573.471	0	0	0	0	0	702.17	0	0	0	0	780.116	0	545.763	189.804	0	0	1112.13	1666.8	0	11.2583	116.171	21.797	262.332	81.8822	138.172	10.1237	85.2858	10.8604	2.53262	105.781	813.915
MSTRG.10179.13	0	0	0	0	0	0	0	0	0	0	0	0	0	0	0	0	0	0	0	0	0	0	0	0	0	0	0	0	0	0	45.85	0	0	1.05833	19.2711	143.826	0	0	0	0	0	0
MSTRG.10179.14	0	0	0	0	975.363	0	0	91.5064	92.428	0	0.001286	0	0	157.458	0	0	0	0	0	0	0	0	0	0	0	0	108.98	0.00847	0	0	0	70.1059	0	0.000544	57.1092	216.008	0.000448	0	0	0	0	0.005342
MSTRG.10179.15	42.7216	0	108.814	1586.35	1353.09	1530.09	365.93	141.861	76.0979	47.7518	89.8299	182.643	20.6309	0	11.8182	24.8797	1.36756	121.247	16.5761	45.6045	18.5577	0	47.9167	0	0	154.842	94.9935	0	0	127.025	0	0	13.7626	92.5318	43.9344	92.1957	0	0	1.9339	0	0	0.003837
MSTRG.10179.16	0	0	0	0	0	0	0	0	0	8.19994	377.427	51.9926	61.541	0	14.821	19.4812	36.2949	162.008	46.7973	449.64	0	117.337	44.9211	24.1151	504.895	474.914	0	430.383	206.221	102.732	14.1369	0.781597	3.19456	400.189	0.547693	203.146	0	12.694	0.081106	0.208977	0.051465	0.992999
MSTRG.10179.17	1.44509	1.8662	3.6059	123.596	31.2474	24.3782	42.6255	4.49172	3.40912	0.238504	53.2825	3.57823	13.6706	6.55641	2.23857	15.714	5.98441	31.9501	0.79911	31.2368	5.87501	23.5194	25.7735	10.4488	74.9804	1632.51	52.1685	179.847	47.536	59.2104	7.24665	5.02875	1.59974	107.402	10.6564	105.205	1.613	0.586153	0.460824	4.3285	17.6763	203.319
MSTRG.10179.18	0	0	0	0	0	0	0	0	0	0	0	0	0	0	0	0	0	0	0	0	0	0	0	0	0	0	0	0	0	0	0	0	0.050944	580.151	67.6341	0	21.8986	0	0	187.334	0	0
MSTRG.10179.19	0	0	0	0	0	0	0	0	0	0	0	0	0	0	0	0	0	0	0	0	0	0	0	0	0	0	0	0	0	0	35.7321	0	0	1.79329	77.1965	0	30.1879	0	0	0	0	0
MSTRG.10179.2	43.4283	38.0999	81.7885	1483.43	0	1232.09	837.865	0	0	0.044672	0.384183	0.019018	16.298	0.086844	20.216	30.6026	798.643	0	33.0449	0	59.7401	1611.31	63.6036	1025.73	7527.32	175.373	164.099	1951.04	3064.44	0	1.38716	0.005062	23.2876	1.25715	66.1876	0.123443	0.000782	81.6744	19.1522	118.956	456.909	2353.97
MSTRG.10179.20	0	0	0	0	0	0	0	0	0	0	0	0	0	0	0	0	0	70.6631	0	0	0	0	0	11.4742	0	0	0	0	0	0	0.042692	14.6196	6.49597	1.6513	118.409	0.029344	16.639	0	1.19512	28.4216	16.3723	167.722
MSTRG.10179.21	0	0	0	0	0	0	0	0	0	0	29.1835	18.6565	19.8549	0	3.95263	0	27.3172	91.3088	0	122.427	0	23.5885	14.5356	0.368344	122.414	96.4334	0	0	153.149	33.3892	0	0	0	0	0	0	0	171.985	0	0	0	0
MSTRG.10179.22	0	0	0	0	0	0	0	0	0	0	0	0	0	0	0	0	0	0	0	0	0	0	0	0	0	0	0	0	0	0	0	0	0	0	0	0	0	157.922	0	0	0	0
MSTRG.10179.23	0	43.5798	0	0	0	0	0	0	8.08639	0.024936	2737.14	0	0	0	0	0	0	0	0.896449	0	10.4843	0.141997	3.81281	0	48.2869	0	42.9603	114.598	3.84593	0	8.37775	24.2372	0.608877	23.7555	12.4314	4.67642	0	2.11112	0	4.70868	6.13359	186.623
MSTRG.10179.24	22.4422	62.6071	75.0803	1191.16	833.992	1075.91	314.686	86.4356	62.3986	22.7996	181.239	21.3965	15.7545	418.036	24.1685	28.4287	93.2104	43.0469	16.0537	49.7643	26.0906	85.8976	1646.53	126.6	151.734	5543.62	3220.88	2989.57	246.955	4039.87	0.163711	7.83887	1.09414	39.8392	0.537332	7.54335	5.53467	43.6971	1.5395	31.7407	16.785	179.614
MSTRG.10179.25	5.03911	0	0	822.938	0	0	0	0	0	0.445394	640.49	0	0	0.837216	0	28.8777	0	0	0	345.276	0	30.8202	0	0	84.199	3478.18	5.11435	2409.22	115.716	24.1268	1.0134	0.508008	1.93066	74.6081	0	0	0.369474	29.2169	0	0	0	73.8845
MSTRG.10179.26	0	0	0	0	0	0	0	0	0	0	0	0	0	0	288.321	0	0	0	0	0	0	0	0	0	0	0	0	0	0	0	0	0	0	0	11.4979	0	1.10922	10.7064	0	0	0	0
MSTRG.10179.27	0	0	0	0	0	0	0	0	0	0	0	0	0	20.0003	0	0	0	121.232	0	0	0	0	0	0	0	0	0	0	0	0	0	0	0	0	77.8266	0	0	0	0	0	0	0.002084
MSTRG.10179.28	0	0	0	0	0	0	0	0	0	0	55.685	0	0	0	0	0	0	0	0	0	0	0	0	0	635.391	0	0	0	449.809	0	0.617501	437.52	90.3883	640.653	192.565	0	0	0	0	795.658	0	4036.83
MSTRG.10179.29	0	0	0	0	0	0	0	0	0	0	0	0	0	0	0	0	0	0	0	0	1e-06	0	0	0	0	0	0	0	0	0	0	0	49.8046	0	162.222	0	36.336	0	0	0	0	0
MSTRG.10179.3	0	0	0	0	0	0	0	0	0	23.0453	701.906	75.8379	0	39.5669	0	98.8874	141.951	258.166	0	332.545	0	199.729	117.445	191.758	0	568.895	226.533	949.899	0	391.884	223.378	0.718874	48.7695	232.314	0	545.193	17.936	0	14.8231	0	97.7794	0
MSTRG.10179.30	0	0	0	0	0	0	0	0	0	0	0	0	0	0	0	0	0	0	0	0	0	0	0	0	0	0	0	0	0	0	0	0	88.7734	0	0	0	0	0	0	0	0	0
MSTRG.10179.31	0	0	0	0	0	0	0	0	0	0	0	0	0	0	0	0	0	0	0	0	0	0	0	0	0	0	0	0	0	0	0	0	66.003	0	116.271	176.288	0.154574	0	0	0	0	0
MSTRG.10179.33	0	0	0	0	0	0	0	0	0	310.056	1709.15	977.12	0	0	0	0	93.6539	0	0	0	0	0	0	0	0	0	0	2987.54	0	0	27.6047	0	0	1451.26	85.4535	0	0	0	0	0	0	0
MSTRG.10179.34	0	0	0	0	0	0	0	0	0	0	0	0	0	0	0	0	0	0	0	0	0	0	0	0	0	0	0	0	0	0	8.61105	0	0	0	18.6392	0	0	0	0	0	0.027815	0
MSTRG.10179.35	0	0	0	0	0	0	0	0	0	0	0	0	0	0	0	0	0	0	0	0	0	0	0	0	0	0	0	0	0	0	0	0	0	0	127.375	0	0	0	0	0	0	0
MSTRG.10179.37	0	16.0219	14.4834	0	173.994	203.485	130.887	56.1096	56.4133	0	0.033195	8.28671	47.9009	0.511548	26.1553	0.037272	2.65229	46.6801	6.77636	0.389299	2.85931	30.1792	10.9784	0.466135	0.625237	0.049108	6.87491	3.28183	19.0795	0.136653	1.20818	0	2.55723	3.39624	11.8827	24.878	0.645568	0.000966	0.95524	15.9015	5.77132	32.3905
MSTRG.10179.38	0	0	0	0	0	0	0	0	0	0.189087	1.38562	0.066981	0.76885	0	0.272296	0	1.91786	0.171169	0	4.03758	0	0.681836	0.145955	0	1.79983	2.55371	0	0.667364	1.43945	0.965674	8.90757	2.61806	1.51444	71.7534	9.18974	0.764989	0	0.899079	0.17745	0.463549	0.182583	8.59735
MSTRG.10179.39	0	3.7879	2.8422	187.795	32.8361	36.5589	28.503	9.46328	7.64013	1.12397	142.72	10.7565	25.5244	2.51323	13.3146	14.298	9.74124	28.9279	6.18103	91.7467	3.25128	39.0359	12.741	9.4152	110.061	76.9531	17.5833	73.0382	79.8928	41.4716	12.6537	4.31027	3.31692	78.947	14.0485	10.1725	0.518519	1.47922	0.450374	13.7664	4.03546	115.386
MSTRG.10179.4	0	0	0	0	0	0	0	0	0	0	0	0	0	0	0	0	0	0	0	0	0	0	0	0	0	0	0	0	0	0	221.787	38.6116	50.7445	546.382	242.877	0	0	0	0	379.348	161.94	0
MSTRG.10179.42	0	0	0	0	0	0	0	0	0	0	0	0	0	0	0	0	0	0	0	0	0	0	0	0	0	0	0	0	0	0	5.54021	6.09554	5.52337	36.3825	59.7222	29.3732	11.0237	0.068295	0.109515	0	31.4362	115.976
MSTRG.10179.43	23.0819	53.8959	27.925	340.104	234.09	564.604	513.564	19.2184	17.0288	4.16007	79.6599	12.063	10.6119	6.40865	3.56777	7.82849	25.914	31.7697	7.42977	20.3782	8.2876	16.599	36.8408	28.1584	82.0999	104.002	25.621	134.084	69.2041	80.5724	47.8663	2.75478	0.801965	6.10814	88.6489	2.85333	0.7634	2.06153	0.098567	4.32624	3.63626	27.4756
MSTRG.10179.46	2.93686	4.03028	3.29757	99.4623	71.0808	65.9761	60.8509	19.784	3.16167	0.195772	8.55629	1.57502	3.82038	0	0	1.76263	4.66882	4.39626	1.6352	5.71471	3.13268	0.568969	4.24264	2.83769	12.4801	30.6681	21.8139	28.4297	1.69012	12.1931	0.60168	0.46651	0	16.3566	4.54567	0	0.296614	0.187453	0.027654	2.35652	2.26771	14.6162
MSTRG.10179.48	0	0	0	0	0	0	0	0	0	0	0	0	0	0	0	0	4.12431	0	0	0.478458	0	0	1.65287	0	3.58415	2.0021	0	0	0	2.36695	4.43947	0	0	1.71726	3.95795	0	0	0	0	0	0	0
MSTRG.10179.5	0	0	0	0	0	0	0	0	0	0	0	0	0	0	0	0	0	0	0	0	0	0	0	0	0	0	0	0	0	0	160.941	0	0	0	0	0	0	0	0	0	0	151.258
MSTRG.10179.6	0	0	0	0	0	0	0	0	0	0	0	0	0	0	0	0	0	2848.6	0	153.995	0	0	0	253.038	0	0	0	0	0	180.216	82.8991	1.33396	0	81.043	38.0965	15.5118	16.303	0	0	0	0	0
MSTRG.10179.7	0	0	0	0	0	0	0	0	0	3.28153	0	0	0	0	0	7.95913	0	0	15.5004	0	0	0	0	149.709	0	0	0	0	0	0	184.699	0	0	0	0	0	0.090435	0	28.2144	0	0	0
MSTRG.10179.8	335.909	583.861	975.79	6581.08	2807.74	2671.16	5333.77	1526.58	699.423	0	0	0	1713.94	0	489.724	0	0	0	983.95	0	504.317	0	0	0	0	0	0	0	0	0	86.1723	0	0	0	0	0	0	0	0	0	0	0
MSTRG.10179.9	0	0	0	0	0	0	0	0	0	0	0	0	0	0	0	0	0	0	0	0	0	0	0	0	0	0	0	0	0	0	59.4259	0	0	0	0	0	0	0	0	0	0	0
MSTRG.10180.1	0	0	0	575.232	0.778504	0	0.436565	0	0	39.7038	1770.36	125.933	235.815	63.1487	93.2697	192.344	179.305	528.517	131.223	597.69	54.8987	329.707	201.282	199.915	1389.8	2535.45	430.595	1670.94	676.484	599.85	16.1862	4.96809	3.51227	76.7609	16.8015	35.3784	1.87975	4.17585	0.775571	93.402	43.5462	787.967
MSTRG.10182.1	0	8.68405	23.1884	745.285	689.353	77.2216	0	95.9942	88.584	9.99438	21.667	24.1267	16.0781	13.4099	9.39296	14.7013	47.4073	13.5908	24.6375	27.7515	23.3317	34.0889	38.9472	57.5349	142.835	79.392	83.581	213.656	76.803	87.6239	2.00392	0	0.422756	10	2.73314	0	0.395587	1.3137	0.694061	10.0103	7.97423	65.2741
MSTRG.10186.1	0	0	0	0	0	0	0	0	12.6006	0	1.70807	0	0	0	0	0	14.153	3.8712	0.091369	0	0	31.4212	16.5644	0	49.1089	5.15676	12.8003	79.4249	14.1745	2.06761	13.0933	7.33137	2.08097	46.5676	4.65413	6.46302	0.97932	1.13879	1.04458	15.3143	7.9495	126.243
MSTRG.10186.2	36.8412	40.9281	56.7619	1320.91	526.839	572.617	348.621	94.4206	0	2.96814	80.3216	11.7355	14.7082	5.68363	8.35774	8.09104	13.3093	25.377	10.8079	37.3816	7.03875	8.23282	11.6154	26.5052	42.1738	132.766	24.2285	76.5818	60.6085	60.9205	2.26452	1.23251	0.823969	4.07734	0.679151	1.164	0.041767	0.536513	0.346544	4.49279	2.83444	23.6849
MSTRG.10186.5	17.8587	43.1744	53.1737	602.198	326.832	315.324	232.07	112.169	14.3556	3.96989	143.135	33.8506	34.2835	2.86665	13.0274	6.86194	19.281	135.158	32.7011	83.7139	2.38824	78.7834	22.8025	22.7809	272.909	283.037	18.7415	167.285	154.151	74.8734	5.17036	0.529564	0.647689	35.3231	2.9856	5.64754	0.080955	0.096722	0.140153	12.2835	8.46207	65.2304
MSTRG.10187.1	14.0138	20.1138	40.817	767.953	210.603	188.739	174.345	63.8361	19.169	3.61735	80.0195	18.0065	33.7269	21.4897	7.32378	9.09727	25.0674	28.3813	16.5359	49.3549	19.6084	22.9176	29.3621	13.941	116.412	267.768	143.794	125.03	38.0387	85.101	6.86179	2.51616	1.59129	60.0106	29.4683	17.0619	2.25294	1.12247	0.064395	31.0376	17.3405	160.526
MSTRG.10188.1	12.3501	16.7454	0	163.932	164.603	165.094	141.111	24.6177	10.4747	2.26987	130.659	27.7348	21.8195	1.47283	22.8742	9.53797	6.86399	51.5851	22.7189	52.7993	1.08261	82.0153	18.4074	8.08687	203.435	204.764	6.67929	210.673	165.396	58.6508	26.8657	5.81253	5.28695	148.984	42.944	24.7824	3.72019	9.47966	0	0.235545	2.97335	1.7291
MSTRG.1019.1	0	0	0	0	0	0	0	0	0	1.33953	4.80864	0.585063	1.10481	1.24078	1.30995	1.41581	2.23024	0.970829	0.706462	2.25422	1.52971	0.850066	2.63033	3.2074	8.77225	10.3572	6.65313	8.28953	5.18295	10.1347	0.42931	0.235652	0.454655	4.49255	5.25108	2.8122	1.8065	1.54114	3.07269	2.07137	3.45156	6.05236
MSTRG.10190.1	9.71871	9.5477	11.0933	250.756	611.065	481.985	69.7497	68.996	23.8569	0.239184	4.94704	1.83786	1.46373	1.10945	0.128339	0.643481	1.63936	1.74153	1.13657	3.75144	0.843698	3.12894	1.95679	2.48056	9.23684	12.9224	6.30996	14.3318	3.55393	4.28189	0.05014	0.211706	0.222561	5.35573	0.529769	3.11998	0.06514	0	0	0.925698	0.386842	2.96678
MSTRG.10191.3	0	0	0	0	0	0	0	0	0	0.085422	0	0.085318	0.044439	0.024593	0.03341	0.024186	0	0	0.05441	0	0.023705	0	0	0.236316	0	0	0	0	0	0	0.108454	0.183012	0	0	0	0	0	0	0	0	0.203315	0.18964
MSTRG.10193.1	0.695539	0	0	2.41529	0	2.43203	0	1.53128	0	0.831262	2.50822	0.537619	0.609681	0.560503	0.746044	0.537372	0.831425	0.629412	0.539793	0.924933	0.759952	0.548639	1.16457	1.2724	4.11312	4.2759	3.09966	3.65219	3.92384	4.15093	0.766397	0.568658	0.319586	3.10947	2.60626	1.72414	0.658833	1.60577	1.08601	0.382673	0.596576	1.31289
MSTRG.10195.1	2.73801	3.82375	2.34374	14.9204	10.3634	14.1833	8.8468	7.8184	6.58257	5.10602	9.88185	4.36709	4.94653	4.43702	5.86438	6.23739	4.99012	3.89644	2.79338	7.31001	3.30668	5.32861	7.56922	7.82754	18.6469	16.7677	11.9394	17.3198	17.9393	15.574	1.04001	1.26296	1.85586	8.09526	6.36117	6.53404	3.6843	5.35838	7.12337	4.64999	3.46812	4.72688
MSTRG.10197.2	0	0	0.33513	0.383717	0	0	0	0.17125	0	0.121633	0.444017	1.37806	0.186955	0.067716	0.440418	0.042762	1.3559	0.000591	0.721892	1.26108	0.330112	0	0.741821	1.51907	4.1664	0.916804	2.63941	0.575109	3.94115	1.15902	0	0	0	1.79535	0.414477	1.07965	1.1035	0.669863	0.309108	0.155966	0	0.087028
MSTRG.10197.3	0	0	0	0	0	0	0	0	0	0	0.469698	0	0.259674	0	0	0	0	0.843168	0	1.08924	0	0.837344	0.828493	0.315516	2.14383	1.39122	0.689394	4.77959	1.0031	1.64418	0.187003	0.112175	0.185279	0.348343	1.76617	1.2212	0.364264	0.841943	0.348805	0	0.147268	0
MSTRG.10201.5	4.43774	3.01147	0	5.03606	0	4.21484	0	0	0	2.91129	4.01324	3.26772	2.58083	2.12694	1.60236	2.47959	2.62914	2.33557	2.91704	6.50296	2.33196	2.17564	5.51894	7.8561	10.4715	13.7635	10.0357	9.45183	9.75506	12.9463	0	0.033933	0.438031	3.18551	5.72617	0.800389	6.66633	5.39999	4.46672	2.00564	1.05724	1.82475
MSTRG.10201.6	6.55467	5.12522	2.60914	3.52222	9.44395	5.30505	1.79982	8.2119	7.90442	4.20603	9.67234	5.79856	7.15956	7.06578	7.25949	5.02395	3.67171	3.13778	6.80683	7.97425	5.88598	5.5784	10.525	10.2365	19.3437	20.1274	20.0676	16.2601	19.8792	19.1606	0.312586	1.31286	1.16955	4.34296	1.48924	2.48752	7.24335	5.00251	4.28334	2.10893	3.24706	2.76881
MSTRG.10202.2	0.345285	0.388892	0.168768	1.39636	2.21149	4.16406	1.7539	0.929236	1.95291	0.984758	2.38009	0.611094	0.664014	0.348651	1.31474	0.427923	1.30264	0.473484	0.46219	1.72213	0.316722	0.781833	1.89626	1.5406	7.57719	7.95972	4.47056	5.65534	7.16418	7.43329	0.369728	0.48804	0.638	6.26442	5.94784	3.15806	1.20943	1.00084	0.915082	1.21108	0.989459	2.59808
MSTRG.10203.1	6.21136	8.33164	6.30175	23.3818	25.8605	27.2629	17.6215	12.2562	15.3415	1.45725	1.98531	1.50519	0.663571	0.82444	1.06901	1.31731	0.520415	0.918456	1.21187	1.42202	0.745462	1.10517	1.46879	2.22487	6.07276	8.19774	3.4727	8.92269	6.48837	2.96518	0.546347	0.91306	0.633226	3.82838	5.22875	3.85526	1.83656	1.64178	2.89137	1.4686	1.31743	2.00293
MSTRG.10203.4	0.15643	0.343012	0.272198	1.31252	1.04974	0.663727	0.949003	0.654061	0.646251	1.91193	2.38442	1.27544	1.15366	1.05689	1.80391	1.8956	1.70352	0.531944	0.815053	1.1006	0.824964	0.714625	0.962365	2.64311	5.6257	6.3471	4.72296	4.23041	4.10209	5.04492	0.989155	1.47659	1.23319	4.55183	5.02884	3.49839	2.08677	3.18115	3.83759	4.7087	3.91607	4.85947
MSTRG.10205.1	0	0	0	0	0	0	0	49.4043	5.92702	1.99509	2.2984	1.35525	1.71716	1.47341	1.54519	1.74836	1.7495	0.887805	1.1573	3.91079	1.11928	0.969946	3.89734	3.31894	6.48428	2.4537	6.45173	8.11025	5.96594	5.34879	0	0.094677	0.558344	2.26031	0.41166	0.27327	4.91455	0.311327	0.100712	1.72701	0	2.31987
MSTRG.10207.2	0	0	0	121.735	0	0	7.85362	0	0	8.66969	15.1231	4.72626	14.9846	12.522	17.647	15.918	14.939	16.8949	9.78188	18.5236	12.0855	20.4033	28.4348	30.3297	14.9697	14.5952	16.6682	18.0587	19.828	14.2929	5.9537	6.51337	3.86293	2.50778	3.92792	6.5001	2.71653	2.32004	3.58115	9.66645	4.23374	0.664059
MSTRG.10207.3	0	0.038181	0	0.137331	0.195503	0	0	0	0.098946	36.9194	44.3519	18.8657	44.0199	33.904	47.7815	42.0144	40.1281	42.3505	25.8322	55.8561	26.8025	48.0517	71.2902	64.0418	54.0762	47.3072	62.8343	52.3853	77.177	48.7565	7.62844	9.99806	7.27498	7.01575	9.91673	8.09679	7.24871	7.82421	9.04337	9.031	11.9652	5.19785
MSTRG.10207.4	0	0	0	0	0	0	0	0	0	0.957084	0.919198	0.554118	0.922529	0.73538	0.996467	1.02575	0.55814	0.846735	0.575362	1.21347	0.346037	1.09297	1.33799	1.33307	0.598841	0.350671	1.21106	1.10922	1.36553	0.527858	0.010554	0.065219	0.009799	0.135228	1.02997	0.471409	0.146275	0.204906	0.257881	0.094886	0.12881	0.020398
MSTRG.10208.2	6.24229	0.220725	1.71817	1.14178	15.5176	1.0415	11.5816	9.65666	4.52219	3.04789	4.94849	4.02266	3.00224	5.8704	2.46526	8.17359	6.08488	2.80437	4.6151	2.82511	3.28738	3.33177	7.66483	8.22054	4.86488	5.13147	5.83203	4.50038	6.26437	5.58988	4.47593	2.33947	3.835	2.56202	3.51896	10.8603	1.21864	0.428589	1.74109	1.92172	2.25155	2.48716
MSTRG.10208.3	0	0	0	0	0.249159	0	2.97639	0	0	0	12.7012	7.50771	0	1.15773	0	0	0	2.47243	1.11957	0	0.363658	0.567434	2.93579	0	0	2.05045	0	22.1792	13.3894	9.00062	3.49038	1.00341	1.98368	0.019111	0.917435	2.96381	0	0	0	0	0	0
MSTRG.10210.1	7.61131	0.549876	0.068332	0	0.041663	0.026284	0.271017	0.245326	0.066043	5.04074	2.88648	2.01339	2.43417	2.98007	1.81861	5.96177	0.930963	1.60582	0.268839	1.88899	2.33716	1.62912	1.62491	1.60617	2.87285	3.98988	3.09413	2.16131	0.7839	3.68558	4.16652	3.30821	4.75318	7.70486	6.07725	6.8319	3.68484	4.25226	5.6138	3.1304	1.33728	3.13911
MSTRG.10210.3	0	0	0.011786	13.6218	0	0	26.3796	0	6.634	2.49588	8.32601	2.00038	2.51781	1.89917	3.18883	1.49543	2.2504	1.16551	2.18118	2.86948	2.55059	3.43553	2.20031	5.69151	10.8898	11.5324	8.43035	7.12674	9.07513	10.246	0.826027	1.3372	0.12609	4.54498	4.8219	4.49494	2.33389	2.31902	3.51187	7.5277	8.31971	8.3215
MSTRG.10210.4	0	0	12.0684	45.5344	54.4628	46.7189	0	0	16.4374	8.81515	15.6899	7.88602	8.23136	7.40253	11.3723	6.64086	7.1298	8.35005	8.02997	9.74062	7.3135	6.23427	11.8922	12.9791	25.5905	35.2487	30.8646	29.4736	31.5463	33.5273	3.5534	4.7598	3.9392	19.1282	26.5855	21.8885	12.629	15.0283	17.6546	11.2584	7.21709	10.7285
MSTRG.10210.6	0	0	0	0	0	0	4.95604	0	0.783255	0.796499	1.46201	1.36407	0.498969	0.191698	3.32191	0.200845	0.079111	1.66662	0.402327	0.385781	0.213768	0.147513	0.099579	0.162001	0.465196	0.580185	1.09483	4.15407	0.715231	0.45032	0.638557	0.332122	0.287814	1.47991	2.95511	1.81344	0.722558	0.466893	6.28041	0.246148	0.139615	2.25413
MSTRG.10211.14	0	0	0	0	0	0	0	0	0.055905	0.075336	0.253343	0.088151	0.13585	0.144115	0.242152	0.060833	0.018896	0	0.059401	0.110738	0.212806	0	0.171553	0.095371	0.258159	0.144318	0.602429	0.260861	0.167875	0.531734	0.867799	0.65461	3.00013	0.257224	0.265423	0.046242	0.212472	0	0	0.19509	0.259432	0
MSTRG.10211.15	0	0.834167	0.351088	2.04271	1.8826	5.51359	0.676051	1.2439	0.489741	2.07996	3.66611	1.70634	1.14089	2.07125	2.80551	4.22654	1.93265	1.91906	1.1084	1.2369	1.31713	1.52268	3.23032	4.8007	4.15495	6.8072	4.31972	4.12045	2.7143	3.6533	2.41697	0.736468	0.757626	1.51473	0.770317	3.1872	0.911485	1.42887	4.99125	1.66581	1.76551	1.45555
MSTRG.10211.16	0	0	0	0	0	0	0	0	0	0.065885	0.153859	0	0.087278	0.063454	0.052536	0.048938	0	0.190693	0.056943	0.039593	0.104895	0.201863	0.177996	0.096853	0.207483	0.105362	0.275885	0.140792	0.163486	0.339496	0.180515	0.026504	0.023207	0.005075	1.58557	0.267073	0.187035	0.247333	0.717224	0.078529	0.161085	0.083345
MSTRG.10211.17	3.05043	0.038696	3.44881	2.28827	1.88122	7.24679	6.32315	0.00767	0.004361	3.88903	3.18413	1.80536	1.48234	2.35166	2.51934	3.99953	3.21568	1.61499	1.01072	2.96882	1.30001	1.45576	2.86248	3.62744	3.82287	6.25796	4.99651	3.89836	2.55622	3.46796	2.13109	0.918554	0.81689	1.67	0.944537	0.271949	0.289859	1.23666	0.28821	1.74245	1.65319	1.46275
MSTRG.10214.1	0	0.586087	0	3.48973	3.02175	4.18394	2.06608	1.66788	1.19613	0.398248	1.11129	0.154172	0.22496	0.340072	0.703164	0.459619	0.711377	0.249907	0.223575	0.433096	0.264264	0.43403	0.827512	0.766234	2.72833	2.1517	1.61003	4.26584	2.33507	2.82459	0.209925	0.243588	0.494404	2.90439	3.53569	5.00256	0.657243	0.554014	0.817409	0.322554	0.605761	1.57282
MSTRG.10217.1	5.53579	0	7.83607	30.4586	23.9474	27.0581	16.871	8.69569	9.84553	0	0	0.026608	0	0	0	0	0	0	0.019785	0	0	0	0	0	0	0	0	0.065436	0	0.031306	1.65018	1.86495	2.72629	0.310206	7.92589	22.1171	8.73753	6.49847	31.2457	0.808963	0.607325	0.472666
MSTRG.10223.2	0	0	0	0	0	0	0	0	0	2.14751	3.02224	0	0.686941	1.70617	0.494566	1.61934	2.48515	0.958322	0.446144	0.991001	1.05935	0.468971	1.74067	0.816091	6.47962	7.4788	11.0135	5.60302	6.70936	7.65166	0.658776	0	0.475071	3.60507	4.64794	4.78832	2.26987	0.775761	3.19878	0.946472	0	0
MSTRG.10224.1	0	0	0	0	1.22234	0	0.691547	0	0	3.69185	13.8115	5.11289	3.54491	5.7548	6.91272	5.83404	3.05365	2.67881	3.71994	4.22548	3.22563	3.72824	9.96555	10.9113	25.7547	7.97759	15.6058	24.3345	16.0911	14.8912	3.5172	1.21206	2.96444	18.2632	13.6126	13.8717	9.38644	11.2182	9.85201	8.91785	4.89187	10.564
MSTRG.10224.8	0	0	0	0	0	0	0	0	0	0.669631	2.1291	0.524499	1.3903	0.668272	1.39283	0.490415	1.10873	0.84242	0.542226	1.32626	0.814014	0.69182	1.63958	1.6803	5.90402	3.66709	3.42255	8.90379	6.19742	4.43296	0.666723	0.763741	1.06206	6.38674	8.96432	5.66056	5.43061	8.95633	0.855705	1.83867	1.93186	2.30545
MSTRG.10231.8	0	0	0	0	0	0	0	0	0	0.642503	5.72607	1.34523	0.694583	0.187163	1.32459	0.307532	3.87844	0.40093	0.375462	0.475516	3.00875	0.08391	1.04721	0.356953	6.09036	14.1228	1.45429	29.0296	2.9881	1.8374	0.096465	0.250031	0.97436	14.1835	11.937	16.4339	5.64716	1.04201	9.05745	3.19777	0.837286	3.17509
MSTRG.10234.1	1.64208	3.49341	3.53732	17.1763	15.2402	17.0186	11.639	3.75069	7.57803	1.75469	3.79497	2.78882	3.48916	2.94935	4.39994	4.11114	2.98033	2.97429	2.73457	7.97681	2.93452	3.04019	4.70849	5.27239	9.19864	6.66024	14.4971	7.74567	8.47028	25.2609	0.418776	0.217717	0.548548	2.76813	2.75617	4.70024	0.773405	1.9192	3.50262	1.42723	1.55632	3.99968
MSTRG.10235.10	0.073779	0.010197	0.22259	1.19546	0.460914	0	0	0.081575	0.064941	0.488074	2.65649	0.02752	1.28501	0.027915	0.828101	0.893412	3.92526	0	0.030636	0.845038	0.022706	0.049866	0	5.62447	1.90255	1.17043	1.33036	1.86241	0.089742	1.26311	2.94886	0.080717	0.515848	1.80388	1.34994	1.84893	2.37834	1.17242	5.47158	0.078523	0.060597	0.090897
MSTRG.10235.2	0.866761	1.83423	0.811172	14.7465	16.0957	26.7859	13.0566	2.65248	10.4233	9.28283	19.3525	7.03168	7.31092	8.84477	12.4196	7.03208	9.13986	4.60332	5.51841	13.3958	6.3381	8.84373	13.5472	13.5511	45.1084	40.1038	30.9369	36.2735	30.4194	40.096	0.551079	2.27856	1.65398	20.94	15.9129	16.6639	4.924	15.501	12.3196	5.89422	6.52898	10.7066
MSTRG.10235.3	4.29869	6.48126	3.24834	13.2593	20.153	0.837451	0.607335	12.3564	2.095	0.18198	0.486755	0.357662	0.365131	0.136767	0.029004	0	0.188923	0.273929	0.594197	1.00561	0.13784	0.195696	2.58362	0.066244	1.4742	2.92689	0.593955	1.9145	0.943575	4.28929	0.034784	0	0.447941	1.70037	0.179724	0.561211	0.184528	0.142137	2.60123	0.415523	0.162063	0.960234
MSTRG.10235.4	0.714748	0	0.292341	3.32568	3.66852	0	0.282758	0	0.882118	5.82152	7.10713	4.67841	2.99601	3.46245	3.93834	3.76775	3.10992	2.35645	1.52822	6.32249	2.13187	3.47455	8.21861	6.29516	26.0074	17.6601	11.0197	31.0313	24.2616	21.3989	2.56824	4.59559	3.25982	6.85708	10.5603	8.36467	2.99338	4.18888	4.2258	4.36089	3.84084	8.75131
MSTRG.10235.5	0	0	0	1.27272	0	0	0	0	0	3.53757	7.16416	3.65339	3.50427	3.3509	5.97679	2.14962	1.278	0.865769	1.29594	4.93061	1.34939	1.75295	2.68369	3.29975	26.6232	17.4966	13.2751	15.4735	15.9322	15.1741	2.7665	4.12162	5.32637	6.69364	11.3774	4.12559	3.27801	2.44062	4.49127	3.64472	4.61118	6.0504
MSTRG.10235.9	0.003021	0.382795	0.0018	0.002176	0.179731	2.02413	1.0041	0.998748	0.64349	0.942022	2.80876	1.08905	0.766983	1.51151	0.708586	2.55659	3.8906	4.8342	4.99249	0.745815	4.53334	3.35902	5.36979	6.47732	3.55371	2.20602	2.05338	2.19773	6.10174	1.61194	1.43052	5.95491	6.11057	6.20846	9.96386	5.8276	4.38487	5.67917	3.20092	8.85102	4.603	3.26213
MSTRG.10240.1	0	0	0	9.5446	18.2047	0	6.07769	0	0	1.41986	4.66298	1.33187	0.723003	1.86094	1.43665	1.17148	1.52982	0.914953	1.07847	0.759536	0.980388	1.58202	2.1102	1.30219	2.2636	5.95617	7.09593	4.31427	4.91812	6.31041	5.48724	4.5822	6.25417	22.5013	12.9463	16.6487	10.803	11.478	11.363	8.10324	4.18108	8.84587
MSTRG.10240.3	0	0	0	0	0	0	0	0	0	10.1872	108.076	35.6889	19.5675	63.694	53.855	79.5481	21.6949	49.8368	14.4364	26.0378	63.1394	54.1021	67.3858	26.836	133.003	206.803	217.958	171.394	37.3775	193.974	26.5592	21.3751	16.0691	63.0083	30.4251	71.3903	30.3189	44.7266	37.284	17.7221	46.0446	85.5199
MSTRG.10243.4	0	0	0	0	0	0	0	0	0	0.025627	0.208891	0.024971	0.066925	0.444722	0.03583	0	0	0	0.049387	0.153357	0.558462	0.013868	0.038749	0.12049	0.126376	0.774749	0.188859	0.5995	0.415786	0.433578	0	0	0	1.23491	4.87549	2.05759	1.08032	27.7339	1.41716	0.145964	0.190009	0.376085
MSTRG.10245.3	4.6704	9.67072	5.03842	23.8472	18.3001	34.436	12.4759	1.61603	11.6184	5.62652	1.94232	1.5971	0.826658	1.06675	0.799067	5.22007	1.26631	4.42963	0.749493	1.77438	3.00676	1.45072	3.38762	1.84783	2.77611	10.1406	8.15598	2.83349	2.74721	2.915	0.564027	1.62255	0.954082	5.15865	2.42947	8.84511	4.45052	4.05225	1.47318	5.11207	2.57264	3.47057
MSTRG.10246.4	0	0	0	0	0	0	0	0	0	0	0	0	0	0	0	0	0	0	0	0	0	0	0	0	0	0	0	0	0	0	0	0	0	2.58965	0	0	0	0	0	0	0	0
MSTRG.10247.1	0.561434	1.12956	0.755845	12.2618	5.70756	6.06758	4.56782	2.18407	0.320006	0.612776	8.49301	1.86868	1.66945	0.418943	0.797567	0.598966	1.62927	1.97083	1.37577	2.24017	0.456241	1.97706	2.15831	2.55698	12.9745	14.6882	2.86682	6.24777	4.47295	9.2069	0.595692	0.509266	0.270315	6.45486	1.49263	0.710953	0.129819	0.275617	0.147013	4.28188	1.79809	9.82881
MSTRG.10249.2	0	0	0	2.03599	4.21116	2.98703	4.18663	0	0	0.429928	2.49297	0.230437	0.356428	0.323542	0.678606	0.167022	1.11105	0.721434	0.55889	0.748862	0.171584	0.784685	1.19137	1.29137	7.26077	7.4619	1.65955	5.98773	4.59543	3.11758	0.338744	0.227638	0.537497	4.79239	3.06609	5.8972	0.485728	0.693346	0.779809	0.736661	0.300275	1.87304
MSTRG.1025.1	0.047948	0.07982	0.054233	0.019461	0.018163	0.029746	0.02232	0.018153	0.017225	0.088834	0.053736	0.08617	0.038317	0.087824	0.065059	0.052305	0.107537	0.044336	0.093949	0.074671	0.122544	0.13464	0.056505	0.087026	0.068473	0.181597	0.031184	0.015499	0.033574	0.087334	0.246426	0.273364	0.223648	1.57897	3.28424	0.347985	0.695434	0.63918	0.504068	4.31541	5.83966	6.06037
MSTRG.10252.2	0	2.98177	0	12.7804	9.97707	4.97809	3.76719	4.75936	3.35523	3.30739	7.11712	3.13189	3.02909	3.50474	2.77106	3.93033	3.36573	3.01921	2.08964	5.63769	2.49445	2.50557	7.96655	6.87134	13.2967	12.2448	12.4367	17.9127	15.0606	14.295	0.71668	0.734651	0.678078	7.2142	5.27127	5.92998	4.45075	6.361	7.54103	2.58457	2.72358	3.22435
MSTRG.10254.1	0.533389	0.249123	0.24002	6.05429	3.93037	2.89489	2.68749	1.50849	1.92211	0.451895	1.75508	0.588902	0.431015	0.400343	0.383785	0	0.693581	0.547646	0.457553	0.599129	0.368521	0.666138	1.23709	0	4.81262	3.49622	1.40204	6.03762	2.9424	0.239291	0	0	0	2.83436	2.01	6.97367	0.636683	0.781675	0	0.433002	0	0
MSTRG.10256.2	0	0.477519	0.212339	4.08596	1.84377	1.33553	1.12052	0.848375	1.61593	0.666406	2.15093	0.628393	1.33376	0.788312	1.64157	0.81801	1.18437	1.02797	0.678089	1.76321	0.94106	0.7679	1.92065	2.05496	5.94744	3.4664	4.63597	5.50344	4.54748	3.87505	0.3246	0.396212	0.851664	2.92865	4.03585	4.91828	1.30437	1.87469	0.916507	1.18541	1.05337	2.05153
MSTRG.10262.1	0.301309	0.583757	0.215366	3.28706	3.55368	4.18126	2.63948	0.700108	1.26553	0.621795	1.75982	0.160219	0.408464	0.399935	0.350161	0.237318	1.3011	0.541383	0.23565	0.880936	0.423504	0.761584	1.38585	1.00375	4.98097	2.69669	2.68817	6.29659	4.29229	3.45893	0.261911	0.281818	0.415141	2.71507	1.65938	11.8833	0.676483	0.778808	1.07901	0.381173	0.241132	0.711907
MSTRG.10267.3	4.42062	4.96221	5.24181	0	0	27.0223	41.1059	11.4412	9.66234	4.08442	0	0	1.79615	0	0	0	0	4.40571	2.01453	0	0	0	0	0	0	0	0	0	0	0	1.32347	0.371458	1.11157	11.2424	5.88917	5.15856	1.66047	1.95683	1.81332	0	0.241599	3.17676
MSTRG.10274.6	4.0422	4.16883	3.45389	0	15.6887	16.0476	8.68233	8.86785	8.70891	5.1512	9.55887	4.10156	4.7797	4.95754	5.6661	4.79105	6.59756	3.98604	3.74143	7.23551	3.55863	5.25023	8.69568	8.87687	21.5051	17.1079	12.8117	17.5598	16.2625	15.9187	1.10256	1.39057	1.37373	4.83757	3.85892	3.95854	3.3564	4.26901	5.99459	2.90049	2.82813	3.25075
MSTRG.10275.1	0	0	0	0	0	0	0	0	0	0	0	0.072358	0.059874	0	0	0	0.121666	0.024637	0.067359	0	0.054066	0.055585	0	0	0	0.15892	0.113134	0	0.184322	0	0	0	0	0	0.299192	0	0	0	0	0	0.20871	0
MSTRG.10278.1	25.667	2.08765	1.05143	3.66334	5.65243	4.78779	2.95297	1.47365	51.1092	5.61506	16.4181	5.06881	4.63706	5.94841	6.06844	7.57748	6.25889	5.1689	4.86432	8.94157	4.22186	5.50829	11.1834	7.28374	29.5911	19.3265	23.6886	23.8203	28.4692	15.7746	4.48709	6.4011	5.23698	12.3537	4.94186	7.90917	4.78919	7.04866	4.75783	7.09538	4.66144	5.85122
MSTRG.10279.1	2.36929	3.70946	2.96466	0	18.5774	17.1029	18.7504	8.12856	8.19683	4.58756	7.64736	2.9389	3.87333	2.51698	5.22467	4.68647	3.37278	1.79329	2.92617	5.86775	3.05343	2.9684	6.28654	5.45897	16.8045	17.952	13.0532	11.3725	13.9114	14.1889	0.209856	0.162751	0.317585	2.40811	4.35993	2.03357	2.5422	2.72975	1.64228	1.75423	1.24964	2.87053
MSTRG.10279.7	0.176932	0.104716	0.06206	12.0884	2.37141	0.53065	0.43884	0.239802	0.051585	1.06966	2.83311	1.09346	0.809197	0.778899	1.02783	0.677995	0.91283	0.720415	0.616356	0.909264	0.570482	0.624288	1.09687	1.65728	3.22379	4.01141	3.33801	2.67968	2.41436	4.71222	0.250381	0.17352	0.118621	3.00811	1.44363	0.916436	1.25537	1.30271	1.36791	1.39144	1.96269	2.75497
MSTRG.10289.2	0	0	0	0	0	26.7053	0	0	3.80298	0.738569	1.55448	0	0	0.56437	0.402493	0	0.613606	0.311873	0.381215	0.388048	0.191804	0.380148	0.503926	1.95375	4.6932	1.16681	1.34058	0.560554	1.42629	1.1868	0.070154	0.42277	0.193709	3.21373	0.349473	4.73195	1.768	2.00419	2.21667	0.313509	0.527248	0.485715
MSTRG.1029.1	0	0.099006	0.128408	0	0	0	0	0.1526	0.126801	0.055466	0	0	0	0	0	0	0	0.049833	0	0	0	0.055669	0	0	0.08786	0.121621	0.03107	0	0	0	0.077555	0	0.033696	0.182038	0.046137	0.087136	0	0	0.09954	0	0	0
MSTRG.1029.2	0	0.363809	0.270637	5.5127	4.15979	3.35923	2.61731	1.31282	1.338	0.675312	1.3069	0.515279	0.575127	0.690216	0.73743	0.476565	0.417256	0.191297	0.384341	0.533554	0.533141	0.419789	0.518281	0.953799	3.11989	3.38796	2.13409	1.95827	1.3185	2.82367	0.941623	1.15372	1.59998	4.95938	6.20538	4.40385	3.3854	2.55679	4.61126	1.8839	1.6856	3.48457
MSTRG.1029.3	0.29063	0.263645	0.312447	2.76846	3.03848	2.51171	1.71024	0.763237	1.5103	0.696515	1.18908	0.624611	0.584274	0.664124	0.731522	0.571015	0.595434	0.340373	0.456974	0.59557	0.579125	0.4599	0.619581	0.749919	3.286	3.23195	1.91211	1.6398	1.95068	2.37575	0.482641	0.514036	0.719992	2.86592	4.24139	3.16285	1.55608	1.35127	1.84756	2.09315	2.16338	3.62378
MSTRG.10293.1	4.60729	5.24674	3.93932	12.3062	13.4614	14.8797	0	4.2356	7.99578	2.01659	4.41891	1.42695	2.56104	2.27902	3.10145	2.52339	2.40187	1.85675	2.15362	3.29045	2.7251	3.36544	1.83407	4.00011	8.93165	7.75524	8.18521	7.49028	6.99929	8.77222	1.0991	1.46344	1.47975	3.56294	4.4817	2.40078	3.45093	3.27704	5.14517	2.80059	2.23506	3.58724
MSTRG.10293.2	0	1.59994	0.275536	2.56399	1.79595	1.96398	4.67207	1.22698	2.00321	0.667829	1.28871	0.727305	0.430146	0.538606	0.463992	0.53432	0.949829	0.476752	0.649023	0.610505	0.373355	0.549231	2.00359	0.884771	2.69525	2.41625	1.82843	2.28799	2.00609	2.47102	0.250367	0.272338	0.317513	1.16216	1.29665	2.27469	0.443182	0.568529	0.775537	0.312853	0.352607	0.687952
MSTRG.10297.1	0	0	0	0	0	0	0	0	0	0	0	0	0	0	0	0	0	0	0.031314	0	0	0	0	0.151157	0	0.06786	0	0	0	0	6.66617	7.58629	11.2678	28.1945	50.8623	25.8833	30.5716	25.0181	16.1921	15.7669	11.5135	24.7618
MSTRG.10302.2	0	0	0	0	0	0	0	0	0	0	0.608055	0	0	0	0	0	0	0	0	0.275896	0	0.416226	0	0	0.569844	0	0	0.77814	0	0.375929	0	1.21549	0.665631	0	0	0.866143	0.234581	0	0.535636	0	0.251575	0
MSTRG.10304.1	2.90602	4.70609	4.73997	4.77699	3.83496	4.91569	5.35017	5.03881	2.86651	6.00211	6.13859	8.18055	5.40607	7.76278	8.05247	15.1493	5.27051	3.3532	5.26304	6.25475	4.448	6.28349	9.29286	4.20462	2.63025	3.53016	3.58508	2.30332	3.36085	4.06673	1.60369	4.90727	1.73644	1.07757	0.39856	0.36336	0.461651	1.71938	1.1338	5.63649	6.54065	2.42679
MSTRG.10304.2	0	0.345958	0.801083	3.16787	0	0	0	0	0	0	0.201648	2.17492	2.59681	1.29919	3.0372	4.05263	1.5185	1.08527	1.78652	1.88151	0.597221	0.202308	3.04876	1.00331	0.680894	1.69092	0.075956	0	0	0.870378	0.406806	1.10782	0.376064	0.636745	0.176619	0.209039	0	1.13506	0.081477	1.4882	1.08361	0.249884
MSTRG.10304.7	0.189282	0.064795	0	0	0.073581	0	0	0.065309	0.027238	0.645955	0.600714	0	0	0	0	0	0.839417	0	0	0	1.07761	0.583126	0	0	0.068364	0	0.383698	0.276701	0.421585	0.984386	2.35789	4.35941	1.43086	0	0.263019	0.001833	0.145503	0	0.19961	2.1009	0	0
MSTRG.10308.4	0	0.265225	0.37546	1.73549	0	2.64625	2.82638	0.834241	2.51224	0.703249	0.597678	0.514522	0	1.13445	1.18419	0.575827	2.73699	2.53847	0	0.544723	0.279193	2.08458	0.486716	3.05555	4.3952	1.68585	3.56688	2.19531	3.90126	3.09352	1.18188	0.808245	1.52415	1.17354	0.936166	3.6435	1.66109	4.20991	2.64762	0.547701	0.27664	0.888379
MSTRG.10308.6	2.16569	0.734247	0.413918	3.68738	3.19985	3.85009	2.86097	1.02805	0.871281	2.12827	2.21301	1.86645	2.17685	1.2128	2.42854	1.4366	1.17723	0.860528	1.54623	1.0437	1.09358	1.38938	1.99618	1.81543	3.89071	3.59589	3.21314	2.99683	3.98633	4.67108	0.532625	1.13743	0.892725	3.93384	4.78721	2.70086	2.25651	3.08839	4.41867	2.59755	5.61865	3.15701
MSTRG.10310.2	0	0	0	0	0.31702	0	0	0	0	1.02439	1.38085	0.207213	0.22672	0.149335	0.188603	0.183522	0.758527	0.355677	0.265715	0.402865	0.724933	0.793929	0.979603	2.15504	4.20029	3.98522	4.48281	2.86619	2.41251	3.63708	0.263248	1.11255	2.13651	7.21502	3.005	2.92693	3.8095	4.38539	6.07578	1.44416	1.28546	2.04824
MSTRG.10311.3	0	0	0	46.1429	39.3462	0	0	7.25636	0	1.28563	1.78429	0	0.410836	1.18373	0.761241	0.209827	1.15297	2.37773	1.57493	1.46446	0.750925	0.134011	1.22305	1.46101	6.22438	3.8409	2.99623	2.8124	7.14668	1.2188	0.765421	0	0	3.31549	0.515149	0	0.116034	3.34275	7.11862	1.11623	0.676195	1.31717
MSTRG.10314.1	0	0	0	0	0	0	0	0	0	0.046303	0.105082	0.201657	0.152163	0.410482	0.152497	0.311574	0.020559	0.043657	0.105388	0.09209	0	0.18041	0.150435	0	0.24519	0.545818	0.295812	0.204498	0.143579	0.372547	0.122851	0.923913	1.11998	9.65457	8.34357	5.38541	15.4693	3.18618	338.105	2.17469	1.23079	2.19803
MSTRG.10315.4	0	0	0	0	0	0	0	0	0	0	0	0	0	0	0	0	0	0	0	0	0	0	0	0	0	0	0	0	0	0	0	0	0	0	20.5729	0	0	0	0	0	0	0
MSTRG.10316.1	1.59718	1.75917	0.332133	33.2637	49.9508	58.1001	21.6183	4.6555	8.96712	3.53974	12.7194	1.98355	2.01228	1.63572	4.81645	0	5.22728	4.91849	1.03663	3.65565	1.99807	4.14046	1.86753	9.14544	35.5632	15.5207	10.8444	21.3704	15.1163	5.33269	0.621001	0.986878	0.308969	7.74047	5.40803	6.38061	1.63636	2.65573	1.9498	1.2771	0.904096	2.86076
MSTRG.10316.2	0	0	0	0	6.21014	6.99709	1.07504	0	0	0.050759	0.304199	0.024028	0.417937	0.5907	0.170757	0.417532	0.054905	0.07591	0.909245	0.02169	0.029132	0.063621	0.016316	0.049802	0.553087	0.189355	0.116093	0.525428	0.154259	2.38407	0	0	0	0.31094	0.475297	0.277402	0.042157	0	0	0.081356	0.454274	0.140048
MSTRG.10316.6	0.92075	0.602748	0.165404	16.5189	29.5807	26.6349	8.17939	2.53061	3.98766	0.748605	3.55682	0.730066	0.579182	0.727638	1.51574	0.418947	1.39083	1.47641	0.431304	1.33961	0.71714	1.14143	1.36744	3.16564	12.5799	5.38527	4.20779	11.5401	5.25378	4.77585	0.245163	0.221929	0.230881	2.98771	3.58832	5.3755	0.821731	1.21047	0.430503	0.856913	0.41682	2.22905
MSTRG.10319.4	0	0	0	0	0	0	0	0	0	1.52433	2.95917	0.771005	0.704992	0.91903	1.66007	0	3.16642	1.08418	1.64908	1.61239	0	0	0.794831	1.08481	24.0228	13.6304	3.82097	9.11255	17.4854	4.58139	0.443982	0.939846	1.22393	10.719	7.51567	7.62475	3.00229	3.23147	3.9137	1.82253	1.55913	4.93381
MSTRG.10320.1	3.09055	3.78917	2.79496	10.1604	11.739	13.4132	7.4034	6.07756	6.2231	2.61559	4.90846	2.72526	2.74735	3.10996	2.44377	3.00867	4.40421	2.66011	2.04993	3.96147	1.69952	2.73106	2.43269	6.55004	14.1347	9.43959	6.58258	8.96288	9.36828	8.91139	0.055696	0.245012	1.28182	6.43555	4.46209	3.15363	1.01732	0.169073	0.837394	2.52435	2.79978	4.34212
MSTRG.10323.3	5.56369	0.828975	5.69094	34.692	8.42274	30.3135	6.15498	5.10071	2.64434	1.23258	4.05008	1.37916	1.51817	5.94129	7.79316	4.95574	8.34561	6.60034	2.07428	1.91136	5.43052	5.59066	2.70056	14.1419	6.5761	20.5303	22.3935	28.7659	32.7831	7.61535	3.07769	0.965242	6.28042	15.2945	20.9634	23.1007	10.9555	14.0029	24.4673	7.50231	4.74327	3.1909
MSTRG.10324.2	0	0	0	0	0	0	0	0	0	0.515354	0.122817	0.28625	0.206219	0.009831	1.31144	0.029754	0.040924	0.87316	0.464132	0.124198	0.107753	1.65857	0	0.28931	0	0.12379	0.007141	0	0.033167	0.042555	0.187594	0.122066	0.194276	0.012015	0	0	0	0	0.215524	0.049933	0.032544	0
MSTRG.10324.3	0	0	0	0	0	0	0	0	0	0.085908	0.232685	0	0.073227	0.040679	0.324769	0.12997	0.188927	0.042017	0.133154	0	0.10639	0.134596	0.095265	0.044501	0	0	0.134257	0	0	0.045111	3.57308	2.12679	3.99296	0.342937	0	0	0.096512	0.345551	0.054943	0	0.275687	0.150026
MSTRG.10324.4	0	0	0	0	0	0	0	0	0	0.34134	0.315736	0.308541	0.233662	0.215818	0.958836	0.058882	0.019699	0.425787	0.346685	0.39533	0.260163	0.646074	0.269735	0.070045	0.054515	0	0.015381	0.426685	0.049494	0.335006	0.290497	0.35734	0.202776	0.186882	0	0	0.128126	0.380263	0.141344	0.059898	0.036688	0
MSTRG.10325.1	0	0	0	0	0	0	0	0	0	2.74417	6.7946	4.0869	3.07271	1.86321	5.89321	3.14361	3.41469	2.10443	3.31251	2.25874	2.97557	4.2532	8.96175	7.3541	9.3781	4.39046	13.2638	5.59296	10.3754	21.6084	0.996686	2.32276	1.76067	0.379948	1.19299	0.892434	0.609573	1.38667	1.35498	4.10733	3.29798	2.02186
MSTRG.10329.1	0	2.40325	4.7256	0.994717	0	0	2.89552	0	2.49822	0	0.167799	0	0.247786	0.112857	0.094471	0.166973	0	0.142702	0	0	0	0.078934	0.219355	0	0	0	0	0	0	0.094473	1.60213	0	0.115851	0.057058	0.098565	0.15478	0	0	0	0	0	0
MSTRG.1033.1	0	0	0	0	0	0	0	0	0	0	0.065803	0	0	0	0.060928	0	0.090585	0.077487	0	0.30087	0.063211	0.040986	0	0.138923	0	0.092804	0	0	0	0.117758	0	0.042776	0	0	0	0	2.41985	0.822197	0.513683	0.060545	0.044527	0
MSTRG.10333.3	0	0.016874	0.016848	0.033803	0.047337	0.033159	0.013179	0.037981	0.008455	0.024781	0.054416	0.051444	0.025012	0.029475	0.032943	0.020294	0.039852	0.023753	0.011437	0.021479	0.042614	0.044831	0.029043	0.020628	0.077057	0.141534	0.122817	0.101921	0.052602	0.120216	0.231545	0.257696	0.371965	1.21673	4.27103	2.8012	1.69121	1.31801	0.684212	3.3075	2.33243	4.50552
MSTRG.10333.4	0	0	0	0	0	0	0	0	0	0.028692	0	0	0.024393	0.050208	0	0.018551	0	0.010839	0.018943	0.036009	0.035317	0	0.021047	0.057545	0.029501	0.173375	0.034704	0	0.092479	0.093295	0	0.265982	0.227508	3.44336	0.185086	0.452601	0.832976	0.396698	1.96922	0.766146	0.746205	1.7958
MSTRG.10334.1	0	0.044163	0.0457	0.05168	0	0	0.048409	0	0.007063	0.025662	0.039102	0.04426	0.033091	0.029658	0.013027	0.018321	0.045208	0.016699	0.030341	0.031894	0.067933	0.063952	0.026402	0.031034	0.05978	0.233032	0.057702	0.045289	0.04366	0.114215	0.165775	0.357267	0.417372	2.79397	3.93512	1.78643	1.50309	0.932246	1.64961	2.92556	2.15756	5.02337
MSTRG.10339.2	3.4032	1.71575	0.945638	0.194947	3.67295	2.53711	3.09324	0.873095	0.539963	1.58556	4.16352	1.47886	1.13204	1.94414	1.59026	3.02186	1.69107	1.50386	1.00739	2.9005	1.6515	1.85129	5.08596	2.45963	4.30895	6.97864	3.5571	3.01735	3.19909	7.15328	0.594669	0.65554	0.957524	4.24103	1.77995	1.10032	1.03257	1.0091	0.586775	2.31487	2.37295	3.42756
MSTRG.1034.1	0	0	0	0	0	0	0	0	0	0	0	0	0.007528	0	0.592551	0	0.014359	0	0	0	0	1.69196	0.055177	1.51679	8.89594	17.2144	0	0.03899	5.02212	0.096542	0.215137	0.016142	0	13.6996	0.549561	2.5976	1.10115	3.092	1.18985	0.018277	0.039526	4.72866
MSTRG.1034.2	0	0	0	0	0	0	0	0	0	0.415931	3.65958	0	0	0	0.317946	0	0.988061	0	0	1.53435	0	0	0.226648	0	7.69639	9.91318	3.06844	10.3175	2.91271	12.9201	0.162561	0	0	4.41229	0.210737	2.02331	2.34201	5.53365	2.44883	0	0	1.7506
MSTRG.10345.1	1.96067	1.14593	1.37916	4.85295	33.2303	22.9848	1.93024	3.2792	3.11594	4.79868	4.61355	4.008	5.36348	3.91966	7.30463	5.40219	3.95797	4.76122	4.01713	9.7885	1.76386	6.86167	7.82939	7.16835	13.5706	27.9902	19.5796	37.6277	17.3925	32.6869	1.5036	3.41052	2.12746	8.10735	9.17836	10.3342	5.5813	4.54115	4.71211	9.28512	7.18912	9.52673
MSTRG.10345.3	0	0	0	0	3.93527	0	6.09877	0	4.69199	0.414732	1.76132	0	0.240907	0.193315	0.16925	0.085336	0.736076	0	0.209179	0.157982	0.279707	0.226397	0.135224	0.074521	1.18474	0.591577	0.502777	0.543458	0.279161	0.417988	2.05075	0.13375	1.33598	4.97675	4.08092	1.01812	0.19364	12.0245	0.34268	0.670306	0.023129	0.221043
MSTRG.1035.1	0	0	0	0	0	0	0	0	0	0.037179	0	0.000874	0	0.426531	0	0	0	0	0	0.332134	0.054312	0	0	0	1.13294	0	1.99981	2.4717	2.03165	0.180885	0.114573	0.644337	0.519539	4.07467	2.29211	3.73398	1.03981	0.498906	0.697776	0.467595	1.08143	0.859493
MSTRG.1035.2	0	0	0	0.414285	0	0	0	0	0	0.042104	0	0	0.042313	0.741385	0	0	0.006259	0.009052	0.023891	0.491259	1.57371	0.053077	0	0	0.910449	0.027475	1.38318	1.08828	2.65656	0.325381	0.280367	0.680214	0.589739	1.22707	3.10319	4.0063	0.261452	0.878356	0.980656	0.564034	1.57344	1.24535
MSTRG.1035.3	0	0	0	0	0	0	0	0	0	0.071431	0.154687	0.015422	0.163456	0.499221	0.104303	0.089732	0	0.023299	0	0.382639	1.52363	0.000373	0.015139	0.12012	1.14022	0.122227	1.96449	2.30897	0.001662	0.018688	0.223741	0	0.110338	0.019535	0.442716	0.745378	1.32096	0.810649	1.04069	0.920942	1.42143	1.03892
MSTRG.10350.1	14.0356	31.7131	20.0122	40.1125	33.101	32.9876	27.3172	23.9642	20.9994	0.740667	2.11618	0.691373	0.703659	0.698766	2.49097	1.84155	1.5964	0.510033	0.513446	1.40795	0.63819	0.681607	1.25347	7.60885	0.772846	1.64972	2.3911	1.19754	1.87915	0.778985	0	6.43399	3.75117	8.84542	7.42729	9.51483	11.4176	12.0002	12.817	0.005654	2.46079	1.09599
MSTRG.10350.2	0	0	0	0	0	0	0	0	0	0	0	0	0	0	0	0	0	0	0	0	0	0	0	0	0	0	0	0	0	0	6.77962	0	6.28805	0	0	0	0	0	0	7.62582	0	0
MSTRG.10352.1	7.26104	5.05368	5.44755	7.50521	5.54248	8.27171	8.2194	8.59875	8.24637	0.535119	4.85972	3.2321	7.68545	2.07687	13.3323	4.18286	0.911483	3.25942	3.61373	9.83881	2.70213	5.05497	3.28708	2.16342	1.8353	10.1902	8.14371	1.28551	14.0347	7.20038	1.057	1.94761	4.44588	2.44469	2.83384	3.64113	2.60149	0.466936	0.727154	3.70752	5.17995	2.43743
MSTRG.10352.2	1.47674	0	0	0	0	0	0	0	0	0	0	0.10341	0	0	0	0	0	0	0	0	0	0	0	0	0	0	0	0	0	0	0	0	0	0	0	0	0	1.49334	2.36139	0	0	0
MSTRG.10353.1	1.2467	1.87759	1.12011	6.47683	9.20598	8.88541	4.04813	3.12657	4.51173	2.10358	4.40583	1.99272	2.24267	2.09368	3.24087	2.06146	2.77578	1.90156	2.30607	3.19697	1.98016	2.64414	3.17433	3.90373	11.2295	8.45443	8.18095	8.24173	8.31939	8.46172	2.08011	1.71844	3.33996	2.45055	3.21178	0.700308	0.844496	1.65855	0.762766	1.79919	1.59394	5.38259
MSTRG.10353.2	2.72353	2.67584	1.57659	3.90278	4.08473	3.50871	1.23989	2.355	1.69582	1.09335	1.73477	1.32836	1.57111	1.35407	2.01031	1.28422	1.34341	1.39408	1.97056	1.46742	1.56425	1.94408	1.56152	2.20933	2.01984	2.01141	1.89178	1.32812	1.62893	2.02673	1.17025	1.85306	0.942076	2.45109	2.86466	2.76075	2.06329	2.07156	2.86911	3.59063	3.06833	3.96553
MSTRG.10353.3	0	0	0	0	0	0	0	0	0	0	0	0	0	0	0	0	0	0	0	0	0	0	0	0	0	0	0	0	0	0	0	1.77869	0	7.1319	5.54276	8.69973	4.18576	4.19252	5.43113	2.58281	2.8066	0
MSTRG.10356.3	2.50616	2.01168	4.13925	3.71368	1.5291	2.91469	5.54871	0	3.98047	1.65891	9.42959	0.687171	3.2467	1.3165	1.94195	1.55094	1.49202	0.468137	0.571652	1.39228	1.27146	1.31847	0.977724	0.668822	1.21625	0.989383	13.7578	0.397709	0.73618	1.3622	2.76657	6.38923	4.11953	0.253113	1.21266	1.46015	1.99868	9.20201	10.0475	1.12087	0.585061	0.851264
MSTRG.10357.1	7.12689	7.06535	5.66806	52.7018	51.5528	48.1724	25.6513	12.8405	18.9805	8.74286	18.4242	6.2773	7.67528	9.07191	12.3911	7.64687	12.4472	5.80282	6.65463	11.3843	6.29634	9.75858	12.8078	14.6263	47.7338	46.1241	34.5885	33.7387	29.5075	42.0075	6.43432	9.06966	9.90162	62.8021	54.7465	59.6745	38.9575	33.9966	60.0259	13.6452	11.6141	23.7019
MSTRG.10359.2	0	0	0	0	0	0	0	0	0	0.571639	2.25545	0.413789	0.391158	0.1689	0.020146	0.638077	0.407091	0.371544	0.629187	0.223598	0.311597	0.547438	0.258008	0.297304	1.90384	0.787585	1.20262	0.861912	0.733689	1.09527	0	0	0.007915	2.00054	0.494986	1.11136	1.66376	0.743418	3.35075	0	0	1.00899
MSTRG.10359.3	0	0	0	0	0	0	0	0	0	0	0.173686	0	0	0.110022	0	0	0.186329	0	0	0.11101	1.13088	0.489315	0.18193	0.052172	0.739961	0.128169	0.680394	0.444998	2.07762	0.546447	0	0.693213	0	0.422919	0.493826	0.175157	0.372946	0.042382	0	0	0.532205	0
MSTRG.10359.4	0	0	0	10.0929	5.6531	9.87122	0	0	3.68014	0.324219	0.932634	0.159386	0.425798	0.6257	0.345847	0.2867	0.217912	0.186163	0	0.434666	0.617091	0.900083	0.396981	0.184694	0.471735	1.97328	3.97489	1.71065	0.320065	4.09967	0	0.348423	0.024472	1.6508	1.31068	0.973317	0.723073	0.437858	0.115152	0.984596	0	0.547518
MSTRG.10359.5	0	0	0	0	0	0	0	0	0	0	0.70442	0	1.18109	0	0	0	2.57249	0	0	2.56125	0.163465	0	3.9443	2.31277	7.87158	10.3882	0	7.48908	7.73144	0	0	0	0.045802	1.2458	0	0	0	0	0.406242	0	0.117202	0
MSTRG.10359.7	0	0	0.941162	0	0	0	0	0.302257	0	0.560652	0.505805	0.684315	0.257753	0.467282	2.0573	0.90088	0	0.43669	0	0.238871	0	0.341922	0.18418	0.272058	0.664158	0.865886	0.99491	0.704115	0.469558	2.00238	0.175678	0.574147	0.547665	1.35743	1.90453	2.08038	1.38944	1.05164	1.76362	0.500728	0.220666	0.761611
MSTRG.10363.2	0	0	0	0	0	0	0	0	0	0	0	0	0	0	0	0	0	0	0	0	0	0	0	0	0	0	0	0	0	0	0	0	0	0	0.450633	0	0	0	0	0	0	0
MSTRG.10366.2	1.94806	5.37007	2.27927	19.5559	22.0659	21.6761	11.7936	4.9697	8.63451	3.49664	10.1284	3.00573	4.55085	4.52966	5.51099	4.71314	4.4596	1.72444	4.65702	6.60835	2.29507	2.89486	8.32982	4.05697	14.5313	28.2199	9.66802	18.7097	28.7129	12.2192	6.38009	10.5966	6.56361	20.7729	21.419	24.9851	17.5795	14.0863	22.6963	6.40429	3.95475	8.89376
MSTRG.10367.1	0	7.35335	4.72012	28.47	33.3548	31.9265	17.2832	11.0051	11.8091	0.189011	3.74923	0.224033	0.128795	0.061035	0.172093	3.78407	0.048514	0	0.071639	0.072842	0.064761	0.094703	0.059741	6.66497	24.1297	0.154384	0.116531	0.057922	0.304458	7.01599	1.38241	0.467834	3.85216	0.193152	3.26794	21.3893	0.129437	7.81364	15.5133	1.03858	0.327235	0.400372
MSTRG.10368.1	0	1.06164	0	16.1517	4.99022	5.79445	4.68269	3.99601	1.31613	6.41332	8.47016	5.62327	2.48874	8.03921	8.65476	7.94831	5.60164	7.58774	6.3947	11.2363	5.61874	5.67105	8.11934	8.18839	30.9458	12.8399	15.7768	29.9659	20.8441	13.2309	6.02948	8.01469	10.7208	13.5324	21.7896	21.8132	12.7338	16.0194	18.3145	13.1908	10.6275	14.5478
MSTRG.10368.2	6.67799	6.37424	2.11123	36.817	27.0671	29.3181	19.9631	14.2129	13.9321	8.81298	16.9965	8.02918	10.7571	5.68628	11.4769	7.63066	7.66432	3.17363	6.03359	6.6407	8.03565	7.47329	10.2268	15.3071	13.52	16.1845	16.9186	14.6895	20.6935	20.9562	8.54545	7.45421	15.3388	19.914	12.6322	27.4019	4.37711	7.36553	13.3486	5.2013	5.36375	7.82636
MSTRG.10372.1	8.16939	11.1192	10.4214	18.499	16.0542	15.4	22.68	16.5874	13.1912	11.2293	16.8102	12.6858	10.7957	16.1886	12.3881	13.0326	12.3049	11.396	12.201	12.9081	11.9254	13.5836	15.6335	22.5766	31.09	23.6576	25.3288	23.7217	25.0687	27.1272	2.21921	1.86556	2.45661	7.96406	6.3778	7.99878	5.4527	6.02499	8.85015	12.4915	9.31653	7.39905
MSTRG.10375.1	0	0	0	0.741525	0	0	0.932925	0	0.346504	3.41827	6.36775	3.46808	2.19425	1.87778	3.41513	3.58411	2.35213	3.37385	2.2378	5.56174	2.79657	4.40486	4.38254	4.10935	12.6188	6.4441	7.65944	14.6082	7.34753	6.93168	0.81798	0.255712	0.614019	1.66719	0.75231	3.97665	0.994029	0.460927	1.27387	3.11613	2.90538	0.43698
MSTRG.10378.1	0	42.1585	0	0	0	0	0	0	23.5032	1.079	0	1.38878	1.82554	1.26404	0.924522	2.49711	2.22072	1.89115	1.49126	1.12912	5.59438	2.44893	2.06804	3.31519	0	0	0	0	0.175339	0	7.47293	3.24657	3.94583	0	0	0	0.2364	0	1.72213	3.36526	1.20429	0
MSTRG.10378.2	49.5487	0	59.7777	16.4576	11.3037	14.7871	24.5622	74.094	0	49.1532	41.6138	42.7079	38.8455	50.5213	66.7574	44.5879	46.2433	36.1101	41.5328	38.3663	50.3173	49.8474	47.3377	72.3246	2.66075	4.02266	37.3463	2.31307	5.25773	21.6273	8.5501	6.79963	10.9882	0.911326	0.229797	0	4.03198	9.7001	19.1506	30.7143	36.4441	7.21741
MSTRG.10378.5	0	0	0	0	0	0	0	0	0	0.798707	1.08527	2.27859	3.74689	2.62249	0	1.23977	2.28632	7.44414	1.38535	2.70225	9.78112	3.94963	1.96532	4.24058	0	0	4.57813	0	0.093873	0.663789	0.390068	0	0	0	0	0	1.9345	5.9931	11.4119	1.74849	0	0
MSTRG.10379.1	3.38056	4.37259	3.20517	9.95261	12.4784	9.9221	5.40151	3.59593	6.61303	6.21574	9.45871	7.93595	4.51935	6.64448	7.48473	4.14072	5.55644	3.28197	5.19237	6.32828	3.42794	6.59843	9.29001	7.70795	13.5991	19.2293	14.2341	10.6259	10.2491	18.6798	0.605118	1.07625	1.42392	4.77252	5.59689	3.59936	2.17739	2.54328	3.52137	4.74097	2.51099	3.9419
MSTRG.10380.3	0	0.928154	0.56335	0	4.79804	4.53346	1.49833	0.875036	0.426489	0.424985	1.48151	0.501606	1.28607	0.883305	4.25888	3.05452	1.62509	1.06897	1.00349	1.25284	1.69529	1.93312	1.608	3.71053	4.44011	4.83157	2.99411	1.45321	13.6552	11.6998	0.312555	0.524539	0.659494	1.48026	1.79668	1.97416	1.21845	2.09696	3.21495	1.39957	0.90635	1.40329
MSTRG.10382.2	259.744	647.054	209.676	768.5	860.453	813.658	416.433	514.643	562.376	8.14619	14.7134	4.53185	7.335	7.77257	8.86135	7.17397	10.4607	7.35606	6.35443	10.383	7.08929	8.99968	11.3708	15.5417	36.9865	56.1086	38.3657	28.1761	26.9225	37.0674	2.01263	2.10043	2.47101	4.32074	6.69551	5.02945	7.53275	6.70019	5.49011	8.5936	6.56908	6.32149
MSTRG.10385.1	180.735	147.201	388.77	177.531	114.317	115.692	106.408	101.746	36.2827	4.74921	5.4597	7.31196	8.19893	3.979	3.56634	6.96716	19.1504	9.76069	7.92656	19.9352	7.96527	11.0573	11.5405	9.52178	10.1216	20.8776	9.30182	30.2521	31.2364	24.2379	0	0.44677	1.99542	0.729858	1.07838	0.518471	4.62974	1.80033	0.474277	0.59964	0.447141	0.72253
MSTRG.10390.12	2.9239	0	2.82829	23.7664	0.35142	21.6499	14.1773	9.74516	0.247024	0	0	0	0	0	0	0	0.011807	0	0	0.019019	0	0.206446	0	0	0	0	0	0.322115	0.176979	0	0	0	0	0	0	0	1.5171	0	0.567375	0	0	0
MSTRG.10390.15	0.17203	0	0	0	2.87794	0.483999	0.252205	0	0.574004	0.647336	0.993918	0.36069	0.55314	0.493091	0.626274	0.471558	0.581374	0.359269	0.437229	0.596691	0.443813	0.121883	0.798611	1.06682	2.23896	2.70192	1.46788	0.866846	0.541632	1.72827	0.57283	0	0.178126	2.72493	2.60434	3.00308	0.052467	1.69395	0.059105	1.22283	0.953102	0.625654
MSTRG.10390.16	0.524554	1.92522	0.347023	3.05009	6.34012	2.64151	2.35751	1.41696	3.44136	2.01826	4.41504	1.90742	1.72365	1.96264	2.45344	2.35158	2.23814	1.67915	1.45973	2.60999	1.62115	2.13583	2.29119	3.05579	9.34239	9.47778	7.27788	7.80586	7.90659	9.0839	0.89385	1.43152	1.78877	7.32759	5.79143	5.84575	2.72681	3.01616	4.54997	3.44074	3.5348	5.53143
MSTRG.10390.19	0	0.852803	0.165083	1.02775	4.45289	2.43631	1.06758	0.862523	2.68954	2.92747	5.4473	2.3235	2.4108	3.03711	3.66693	2.23822	2.75256	1.8804	2.37834	3.14337	2.69764	2.6244	3.88944	5.8438	15.4175	14.4251	9.99081	8.00233	9.31751	11.4473	1.30621	2.06289	1.67271	7.20735	7.30136	4.03468	3.15753	3.74553	4.23416	3.82349	2.60728	5.66679
MSTRG.10391.1	0	0	0	0	12.6661	0	0	0	0.623782	5.37822	12.944	5.44187	3.89513	4.27816	6.53523	5.95707	2.94201	1.9615	4.52397	7.16359	4.3259	3.30118	7.08899	7.94719	19.9208	36.7367	17.0501	17.1595	16.1504	23.4036	3.44207	2.39583	4.14039	18.2416	20.9573	14.1588	9.04437	12.552	19.2162	3.22643	11.0617	10.6378
MSTRG.10391.2	0	0	0	0.176925	0	0	0	0	0	0.512009	1.06325	0.141912	0.807543	0.804657	0.430581	0.176527	1.967	0.44874	0.632121	0.684461	0.539762	0.814989	1.09943	1.3718	3.6538	4.79368	3.2224	1.78876	2.01193	2.00136	0.313062	0.23784	0.625851	0.887209	1.04415	1.30734	1.28136	1.22428	1.15649	2.86255	0.357209	1.27519
MSTRG.10391.3	0	0	0	0	0	0	0	0	0	0.146931	0.642549	0.288407	0.318582	0.367245	0.151455	0.181057	0.487985	0.877749	0.287876	0.79858	0.345061	0.635419	0.900101	1.02725	1.92225	1.39956	1.96982	2.49538	1.66233	2.80814	1.45165	1.39685	1.49901	5.31199	2.05583	0.872549	2.05193	2.01342	2.46389	1.2689	0.394858	0.607769
MSTRG.10391.4	0	0	0	0	7.934	0	0	0	0	0.550185	1.21255	0.386515	1.04161	0.79374	0.349796	0.275888	3.01431	0.570354	1.0053	1.66266	0.647194	2.1848	2.91055	2.6423	6.14673	7.77995	3.57794	4.64995	3.8554	3.7378	0.653905	0.324666	0.760707	1.10859	1.1296	1.0035	1.66934	1.3629	3.72225	3.38542	0.374597	2.74763
MSTRG.10391.5	0	0	2.14495	0	3.55602	0	11.5354	0	0	0.351472	0.969737	0.536547	0.546967	0.729577	0.288305	0.450209	2.19477	0.608676	0.382267	0.763855	0.402647	0.572945	1.21547	1.50467	3.20509	4.06259	1.90982	2.50663	2.25648	2.64953	0.345686	0.341539	0.562577	1.24851	1.2066	0.900536	0.61993	0.760678	1.31853	2.63484	0.436174	0.978434
MSTRG.10391.6	0	0	0	0	0	0	0	0	0	0.243787	0.951008	0.369479	0.42613	0.45303	0.183972	0.265007	0.608021	0.571247	0.417243	0.728677	0.383541	0.430057	1.15781	1.3939	3.11365	2.19997	1.94843	2.73968	2.32096	3.1567	0.471785	1.18337	0.996746	1.94132	1.61936	0.869324	0.85292	0.936756	1.57872	1.00154	0.740685	1.09991
MSTRG.10391.7	0	0	0	0	0	0	0	0	0	0.137167	0.550978	0.201753	0.153558	0.243535	0.087314	0.169569	0.620485	0.761859	0.25773	0.902582	0.848673	0.945036	0.701527	1.32012	3.48331	1.47951	2.24688	2.58207	4.22073	1.99803	0.600142	0.150025	0.539126	2.60421	1.50038	1.3349	2.35394	2.9741	2.66555	1.24529	0.361039	0.495313
MSTRG.10391.8	5.30712	7.15982	3.66263	21.322	9.74109	28.3772	5.18368	9.30073	10.7604	2.26872	5.92703	2.07879	1.81852	3.22462	3.95785	0.944929	2.07393	1.96039	2.14727	2.28251	1.99535	2.09345	1.98283	4.1982	11.7378	4.90428	11.9342	3.67438	8.18335	15.0984	1.79756	3.79936	3.6045	13.7824	9.84951	7.49704	4.45751	4.517	3.25927	4.20647	2.25211	6.86914
MSTRG.10391.9	0	0	0	0	0	0	0	0	0	0.176973	0.479474	0.053739	0.190848	0.226054	0.138914	0.156118	0.202217	0.427734	0.148065	0.367464	0.181895	0.086726	0.137607	0.414312	0.746545	1.33966	1.38551	0.639271	0.545077	0.983362	0.151881	0.051709	0.339748	0.370543	0.964233	0.638538	0.954157	1.60845	0.320149	0.583816	0.037949	0.65662
MSTRG.10392.1	0	0.176274	0	1.43743	0	2.33425	1.30317	0.520016	0	0.321676	0.63156	0.125258	0.169515	0.131051	0.165395	0.235172	0.279131	0.075107	0.104499	0.300992	0.124269	0.250304	0.702688	0.292827	1.37831	0.971097	1.0963	2.44859	1.36538	1.63324	0.181469	0.211097	0.167924	1.00926	0.927541	0.493169	1.23689	0.146649	0.181816	0.373919	0.217404	0.91083
MSTRG.10393.1	0	0	0	0	0	0	0	0	0	0.893803	1.2544	0	0.613481	0	0	0	0.199119	0	0.437713	0	0.773767	0.608617	1.14019	0	1.39015	0.800806	0	0.862458	2.29429	2.27108	0	0.22587	0.329554	0.470563	0.499055	0.307045	4.98949	3.55286	6.90124	1.40617	1.15389	0.352337
MSTRG.10393.2	0.427528	0.586309	0.555694	3.52264	1.012	1.70245	1.04942	0.816851	0.676268	0.370643	0.65259	0.488074	0.318911	0.812729	0.344987	0.792594	0.373344	0.375183	0.289289	0.375637	0.424005	0.230848	0.553433	1.01256	1.03445	0.554821	1.46838	0.947292	1.10112	1.19563	0.156907	0.077954	0.104508	0.239505	0.20412	0.170704	1.98757	1.60343	2.97957	0.41155	0.578065	0.308321
MSTRG.10395.3	4.26506	0.110116	1.8101	0.222909	0.779066	0.217097	0.002211	0.202597	2.02047	0.852211	0.729061	2.14622	0.260579	0.604849	0.303315	0.385722	0.25464	0.138931	0.686124	0.426415	0.617335	0.283095	0.606127	7.03981	3.05044	2.77341	12.9639	1.2562	8.04255	1.02317	1.38182	1.46649	2.68539	4.56918	6.99996	8.64088	8.3166	6.89944	16.7939	2.22065	1.33956	3.59837
MSTRG.10397.2	0	0.156657	0	0	0	0	0	0	0	0.127753	0.183275	0.167795	0.173344	0.11817	0.147877	0.138232	0.053128	0.045192	0.047078	0.162098	0.090603	0.055732	0.215787	0.152908	0.220758	0.236351	0.216918	0.347619	0.286949	0.253513	0.439367	0.361889	0.793813	0.411532	1.16059	1.92148	0.845631	1.31678	1.01476	0.19909	0	0.135156
MSTRG.10399.2	0	0.495578	0.960275	1.97887	3.65031	1.29406	0.884198	0.877359	1.08116	0.732921	1.64211	0.872994	1.03588	0.804185	1.15557	0.83363	1.61009	0.990076	0.969346	1.65762	1.14667	1.34566	1.94069	1.41261	4.0765	4.37929	3.4156	4.17992	4.40048	4.67576	0.271089	0.195916	0.537905	3.50931	2.88074	2.30858	1.45021	1.22534	1.47316	1.24234	1.3436	1.91581
MSTRG.10400.4	0	0	0	0	0	0	0	0	0	3.07779	4.02459	1.37128	5.57546	0.789189	2.58748	1.64425	2.70592	3.21385	0	6.11074	3.7061	3.40043	8.41548	9.16385	17.2831	13.8683	12.8591	15.1538	8.64054	17.0311	3.29009	0	1.95909	6.44386	8.21469	5.87789	8.71388	6.06478	6.16641	3.82815	1.43175	4.09156
MSTRG.10400.6	0	0	2.20473	11.6066	0	0	0	0	0	2.14569	0	0.738585	1.85158	0.328982	3.77938	0.296343	0.698346	0.362764	0.409424	4.2056	3.16684	1.7233	4.46356	6.8415	16.0638	9.22054	4.2696	12.9092	2.11172	13.0159	1.81169	2.48209	1.96159	10.8412	11.1734	7.50755	4.68513	6.46108	6.88098	1.98182	0.467567	4.599
MSTRG.10401.1	0	0	0	0	1.06935	0	0	0	0	2.8115	2.06415	1.16508	2.96962	1.96873	1.40368	1.46934	2.26513	0.12438	1.45939	1.78798	0.714444	1.59883	4.00694	1.54491	10.0754	9.43335	1.48956	3.45667	1.81137	13.4278	0.455871	0.350625	0.951927	5.61237	2.9368	0.659346	1.83202	0.467891	2.54295	0.362658	0.796137	1.98337
MSTRG.10406.1	2.48143	2.28613	1.7009	12.4444	13.8183	15.0864	9.11341	5.23437	5.58453	3.95624	8.20837	3.70982	2.74688	3.36685	2.30415	2.94776	3.04543	2.13892	2.57848	3.10249	2.4115	2.68035	4.19319	6.62239	17.4164	12.9208	11.7555	9.32396	11.3489	16.8491	1.435	2.55	0.399376	4.78856	6.16181	3.67866	3.53353	3.76083	4.9269	7.27205	2.66513	8.9353
MSTRG.10419.2	3.72762	0	0	0	35.4698	0	0	4.20221	0	0.278326	2.40448	0.36553	1.04513	1.5053	0.333947	0.873685	1.40442	0.271947	2.09846	1.01351	0.768853	2.39055	2.40348	1.36391	6.49887	1.65374	4.27419	5.67542	4.33152	4.27138	1.94836	1.32535	0.634811	4.69	6.36426	3.80338	6.0318	5.84694	9.42174	0.12344	1.63038	1.38168
MSTRG.10420.1	0	0	0	0	0	0	0	0	0	2.47655	6.04403	2.07175	2.82044	1.60024	4.68912	1.69324	4.44693	2.47075	1.91222	3.15258	1.97722	0.470948	4.70481	3.04582	10.8496	6.05121	7.40284	15.0359	11.9262	9.40939	0	0.178158	0.648042	0.766116	0.93182	3.00732	0.465878	0.653417	0.031566	1.0749	0	2.97987
MSTRG.10420.2	0	0	0	0	0	0	0	0	0	3.13386	8.16846	2.32188	4.75939	2.55791	5.71552	2.05464	2.77951	2.18671	1.11044	7.21008	2.55995	2.06797	8.78151	5.40017	20.2075	11.521	9.91709	23.4955	16.8007	14.8313	0	0.298689	0.870126	3.08645	2.82677	3.28904	0.601451	0.777968	0.985117	0.875703	0.006787	2.43892
MSTRG.10420.20	0	0	0	0	0	0	0	0	0	0.058678	0.42501	0.047886	0.177888	5.13978	0.07889	0.679802	0.024092	0.383407	1.56466	0.049676	0.039696	0.03582	0.211332	0.070883	0.043636	0.368006	0.143429	0.034749	0.043584	0.120744	0.668922	0.434163	0	0.007163	0.016635	0.412759	0.055837	0.108077	1.30078	0.877262	0.184102	0.278143
MSTRG.10420.3	0	0	0	0	0	0	0	0	0	2.50886	4.91428	2.30758	4.33563	2.01728	5.22509	2.16693	3.24231	1.90387	2.93289	5.1877	1.77424	3.47557	5.37865	3.98575	12.0951	8.12517	7.43483	16.7064	13.8728	14.4474	0	0.145342	0	1.14836	1.88054	0.228977	0.279097	1.12265	1.25394	0.858849	0	0.287979
MSTRG.10421.1	0.372959	0.34839	0.33566	0.286681	0.613082	1.47263	0.55634	0.267409	0	0.48076	0.379816	0.239957	0.446905	0.150593	0.101469	0.377617	0.508767	0.371925	0.362787	0.518656	0.346168	0.576034	0.470227	0.79863	0.886368	3.91207	0.812487	0.852115	0.361159	2.18142	20.6447	20.5614	27.6841	121.794	136.888	105.853	54.0265	54.2832	83.55	33.6231	28.0202	74.0218
MSTRG.10426.1	0.944558	1.38912	0.217123	10.9149	2.03248	3.49791	1.50899	1.34932	1.13353	0	0	0	0.095551	0	0	0	0	0.051492	0	0	0	0	0	0	0.003527	0.04898	0	0.014431	0.072536	0	0	136.182	148.899	95.3416	374.091	3.60837	144.926	143.526	122.835	0.163191	0.049808	0.053006
MSTRG.10426.10	0	0	0	0	0	0	0	0	0	0	0	0	0	0	0	0	0	0	0	0	0	0	0	0	0	0	0	0	0	0	0	0	0	91.4356	0	0	0	0	0	0	0	0
MSTRG.10426.11	0	0	0	0	0	0	0	0	0	35.3709	116.706	0	16.293	27.2678	29.353	15.2913	30.5858	10.3885	12.892	44.3312	13.0872	0.4556	73.1051	58.1319	148.526	118.928	121.077	51.5212	161.323	107.655	10.0078	8.87422	10.6105	29.8946	53.4117	43.5832	12.5096	17.7955	1.06277	0	0	61.5588
MSTRG.10426.12	0	0	0	0	0	0	0	0	0	0.246745	0.041995	0	0.106792	0	0	0	0	0	0.015318	0.148108	0	0.001309	0	0.002133	0.405092	0.132307	0.096934	0	0.385418	0.297611	0.633454	0.191323	0.574126	0.612869	1.60102	0.894638	0.279985	0.554475	0.659151	0	0	0
MSTRG.10426.13	0	0	0	0	0	0	0	0	0	0	0	0	0	0	0	0	0	0	0	0	0	0	0	0	0	0	0.080167	0	0	0	0.794677	0.331384	0.440163	1.5954	1.31063	1.41418	0.421217	0.732587	0.836507	0	0	0
MSTRG.10426.14	0	0	0	0	0	0	0	0	0	0	0	0	0	0	0	0	0	0	0	0	0	0	0	0	0	0	0	0	0	0	0	6.38082	8.48178	0	15.7476	0	5.83303	8.29083	8.96207	0	0	0
MSTRG.10426.15	0	0	0	0	0	0	0	0	0	0	0.015277	0	0	0	0	0	0.013341	0	0	0	0	7.03439	0.060206	0	0	0	0.022139	0.015022	40.8953	0	0.032795	0	5.32141	44.9371	25.5592	0.073497	0.015918	17.6806	40.9029	0	0	0
MSTRG.10426.16	0	0	0	0	0	0	0	0	0	0.03555	0.752663	0	0.032712	0.176019	0.012231	0.173735	0	0	0.07359	0.077355	0.016573	0	0.207157	0.005788	1.14631	0.385892	0.485742	0	0.867338	0.869657	2.93194	3.44712	2.68441	2.70936	11.5363	9.92879	3.58997	1.29994	0	0	0	0.361642
MSTRG.10426.17	0	0	0	0	0	0	0	0	0	0.745157	5.03645	0.006928	0.37717	0	0	0	1.85383	0	0.792608	0	0.236277	0	2.87511	2.99032	6.65685	0.555169	0	4.47276	3.69029	5.98532	1.33821	0.650287	0.671372	2.59335	0	7.54702	12.1335	12.2004	1.3092	5.48265	4.61775	1.18004
MSTRG.10426.18	0	0	0	0	0	0	0	0	0	0	0	0	0	0	0	0	0	0	0	0	0	0	0	0	0	0	0.202302	0	0.117703	0	1.38768	1.81024	1.31209	7.13164	1.85936	12.6711	0.988639	0.883785	2.20115	0	0	0
MSTRG.10426.19	0	0	0	0	0	0	0	0	0	3.37034	4.24027	0	0	0	0	0	0	0.011509	0	0	0	0	0	4.10911	12.6151	0	0	0.030208	4.84107	0.023202	0	0	4.19285	45.2665	0	0	0	0.008365	0	0	0.013568	0
MSTRG.10426.2	8.50223	7.01176	1.9702	26.9859	14.421	22.0898	8.2539	5.54811	6.79249	1.20163	2.51615	0.466596	0.759036	0.656061	0.765873	0.376909	1.81436	0.543942	0.644126	0.964068	0.512573	0.750813	1.08158	1.69335	7.12424	5.31074	4.15262	3.98316	3.65336	4.7122	6.44022	12.646	7.9486	22.0464	39.9715	25.0608	4.67499	3.09567	10.338	8.23628	2.22612	8.07054
MSTRG.10426.20	0	0	0	0	0	0	0	0	0	0.012082	0	0	0.011136	0	0	0	0	0	0	0.026191	0	0	0	0	0	0	0.110674	0	0	0	0.765217	0.454611	0.692922	1.43655	2.49144	2.48568	0.379517	0.515259	0	0	0	0
MSTRG.10426.21	0	0	0	0	0	0	0	0	0	0	0	0	0	0	0.008222	0	0	0	0	0	0	0	0	0	0	0	0.075449	0	0	0	1.83994	1.55256	1.87857	3.47572	3.8122	4.28632	2.10444	5.50064	2.84684	0	0	0
MSTRG.10426.22	0	0	0	0	0	0	0	0	0	0	0	0	0	0	0.022269	0	0	0	0	0	0	0	0	0	0	0	0.182385	0	0.109692	0	2.47791	2.90046	3.27816	4.51959	6.1571	6.36922	4.04239	18.0704	5.21061	0	0	0
MSTRG.10426.23	0	0	0	0	0	0	0	0	0	0	0	0	0	0	0	0	0	0	0	0	0	0	0	0	0	0	0	0	0	0	0.446686	0.190793	0.472174	0.281547	0.714001	0.261679	0.357031	0.681764	0.340763	0	0	0
MSTRG.10426.24	0	0	0	0	0	0	0	0	0	0.014787	0	0	0.013605	0	0	0	0	0	0	0.031765	0	0	0	0	0.015601	0	0.227077	0	0	0	1.04438	0.388474	1.1589	1.20487	4.45958	2.54607	0.649776	0.731358	0	0	0	0
MSTRG.10426.25	0	0	0	0	0	0	0	0	0	0	0	0	0	0	0	0	0	0	0	0	0	0	0	0	0	0	0	0	0	0	18.8327	22.504	26.4239	98.5762	22.9477	41.1186	23.0275	12.3706	28.2476	0	0	0
MSTRG.10426.26	0	0	0	0	0	0	0	0	0	0	0.723233	0	0	0.002581	0.004857	0.004175	0	0.018924	0.002518	0	0.00485	0	0.015384	0	0	0	0	0	0	0	2.32069	3.34284	2.39026	20.6428	5.21202	18.4106	0.844439	1.40389	2.36474	0	0	0.078066
MSTRG.10426.27	0	0	0	0	0	0	0	0	0	0.570156	2.18654	0	0.231662	0.40571	0.116451	0.322152	1.15479	0.121044	0.14547	0.471837	0.223113	0.00545	0.425792	1.49111	2.49986	0.775264	2.70425	0	2.15502	1.54126	3.50333	1.39611	3.70229	7.89534	15.1656	14.3982	3.98597	1.2109	3.07264	0	0	0.900734
MSTRG.10426.28	0	0	0	0	0	0	0	0	0	0	0.01264	0	0	0	0	0	0.011256	0	0	0	0	1.38156	0	0	0	0	0.023441	0.012517	11.2671	0	0	0	0	0	32.6641	11.2526	0.017455	0	13.2683	0	0	0
MSTRG.10426.3	0	0	0	0	0	0	0	0	0	0	0	0	0	0	0	0	0	0	0	0	0	0	0	0	0	0	0	0	0	0	4.14782	1.39696	3.57179	7.32845	12.0635	11.5728	6.54893	14.4229	7.28053	0	0	0
MSTRG.10426.30	0	0	0	0	0	0	0	0	0	0	0.313069	0	0	0	0	0	0.017074	0	0	0	0	0	0	0.757894	0	0.007623	0	0	0.124265	0.009196	0	0	10.9114	0	0	0	0	0	0	0	0.019079	0
MSTRG.10426.4	0	0	0	0	0	0	0	0	0	0	0	0	0	0	0	0	0	0	0	0	0	0	0	0	0	0	0	0	0	0	4.41448	3.09095	3.33822	14.2818	10.3773	21.0126	5.76732	4.05006	8.08788	0	0	0
MSTRG.10426.5	0	0	0	0	0	0	0	0	0	0	0	0	0	0	0	0	0	0	0	0	0	0	0	0	0	0	0	0	0	0	3.50756	1.56885	2.66755	4.32018	7.25957	7.04217	6.91251	61.2114	5.28906	0	0	0
MSTRG.10426.6	0	0	0	0	0	0	0	0	0	20.3232	58.5499	20.0074	5.14973	11.8156	13.6909	9.24488	16.5745	5.15489	5.69824	18.4222	5.50333	0.025103	37.6708	27.5563	65.3477	60.8445	61.9551	118.198	67.06	50.0232	18.2076	12.2425	15.2393	41.2421	27.5775	40.7293	12.0136	20.218	46.356	0	0.060223	20.9274
MSTRG.10426.7	0	0	0	0	0	0	0	0	0	1.14004	2.40418	0	0.541127	0.693835	1.77812	0.433472	1.52468	0.194956	0.260575	1.14636	0.322214	0.007066	1.94753	1.94078	4.33085	2.68364	4.39335	0	4.53189	2.66689	10.0315	7.86589	7.98681	27.4059	44.3832	56.6706	13.7602	9.75173	11.3886	0	0	1.02592
MSTRG.10426.8	0	0	0	0	0	0	0	0	0	0	0	0	0	0	0	0	0	0	0	0	0	0	0	0	0	0	0	0	0	0	11.4085	8.69867	3.42327	9.86269	30.5018	14.72	12.9485	9.15865	11.5178	0	0	0
MSTRG.10426.9	0	0	0	0	0	0	0	0	0	4.42131	7.60124	0	0	0	0	0	0	0	0	0	0	0	0	5.9504	17.9128	0	0	0.105762	0	0	33.3559	29.7058	11.077	48.191	0	0	0.03011	27.5067	0	0	0.020103	0
MSTRG.1043.2	0	0	0	0	0	0	0	0	0	0.225279	0.340913	0.207145	0.182292	0.16727	0.434328	0.219235	0.384036	0.363407	0.14939	0.517419	0.158603	0.261016	0.295961	0.761593	1.74331	1.78006	0.890359	1.30438	1.20892	1.28324	0.606724	0.901897	0.506746	2.02502	4.1007	1.97211	0.416646	2.49148	0.735024	0.357968	0.028953	0.312921
MSTRG.10434.1	0	0	0	0	0	0	0	0	0	1.60882	1.62642	0.569128	0.9366	0.274906	0.25005	1.30954	1.25436	1.18803	0.6804	2.20741	1.16039	0.739786	0.50207	1.41352	10.5837	9.30364	2.8143	2.50671	7.01464	4.23342	1.14208	1.09645	1.29532	5.35857	6.62554	5.9551	3.37363	3.13433	2.24832	1.57021	3.04379	4.1183
MSTRG.10434.2	0	0	0	0	0	0	0	0	0	0.958925	2.03045	0.655045	1.07213	0.321326	0.378357	1.4967	1.95128	0.348175	0.689014	2.77392	0.749178	0.650396	0.798519	3.3227	4.92401	6.76835	2.50579	5.58946	5.27256	5.08962	0.060571	0.909443	0.970364	3.72511	3.06169	4.68996	1.66961	1.51609	1.35287	0.641446	0.53857	1.89792
MSTRG.10437.1	0	0	0	0	0	0	0	0	0	0	0	0	0	0	0	0	0	0	0	0	0	0	0	0	0	0	0	0	0	0	0	0	0	0	22.6865	3.84883	0	0	0	0	0	0
MSTRG.10438.1	0	0	0	0	0	0	0	0	0	0	0	0	0	0	0	0	0	0	0	0	0	0	0	0	0	0	0	0	0	0	0	0	5.92717	0	0	9.64019	0	0	0	0	0	0.053553
MSTRG.10438.3	0	0	0	0	0	0	0	0	0	0	0	0	0	0	0	0	0	0	0	0	0	0	0	0	0	0	0	0	0	0	0	0	0	0	0	0.697774	0	0	0	0	0	0
MSTRG.10440.2	2.54928	0.762037	1.74245	11.2962	1.31465	4.39514	0.780642	3.28785	2.13128	2.03043	2.38242	0.643987	1.16492	2.08287	2.21003	1.98439	1.94443	1.57384	0.815776	2.147	1.50459	2.05582	1.90548	2.31441	6.79611	10.5848	14.4178	8.8045	8.35987	11.8192	3.9656	5.0369	5.92788	12.1932	16.9267	19.6316	10.8512	9.45643	19.5719	2.32349	1.70003	4.94018
MSTRG.10441.1	0	0	0	0.848937	0	0	0	0	0.162625	0.308878	0.417382	0.032781	0.149358	0.162435	0	0.014354	0.410757	0.353459	0.012163	0.749233	0.183433	0.135432	0.757289	0	3.17683	0	1.87539	0	3.06575	1.28252	0.00388	0.041184	0	1.06464	1.34694	6.51445	0	0	0.064691	0.266345	0	0
MSTRG.10444.1	1.57414	1.58865	1.70353	7.37849	5.37702	4.16541	3.18144	2.63539	3.39432	2.6482	3.51753	1.73273	1.94217	2.76257	1.94736	3.12888	3.2154	2.18301	1.69128	3.09032	2.69425	2.75177	3.72464	3.73623	3.81292	4.82988	5.47968	3.0095	2.25019	7.12932	0.433145	0.736161	0.636215	1.20214	0.510515	0.742069	4.17487	1.00155	1.64055	1.41887	1.36613	0.954546
MSTRG.10445.3	3.21813	2.16787	2.63736	14.7605	14.1644	5.85774	6.18097	4.45665	1.27293	3.72457	5.59446	3.85608	3.49986	3.3223	4.78801	4.28259	3.94134	1.58346	2.26478	4.14739	2.39357	2.64988	4.12405	4.94058	16.5592	17.1767	8.52646	8.12299	9.48454	14.7736	1.41514	2.03405	2.07046	6.53292	8.39452	4.70474	3.12329	4.6753	4.68146	3.87147	3.27413	6.88175
MSTRG.10447.4	4.0274	3.90208	2.54947	3.15885	13.2572	21.6443	9.20645	1.04824	10.215	0.963701	2.38756	0.498605	0.803318	1.36897	0.711508	0.6303	0.852675	0.761132	0.942458	1.32622	0.747979	1.06608	1.56529	2.4649	6.32648	4.49054	3.64922	6.70069	3.82173	6.21128	0.307109	0.305499	0.320999	2.12193	2.48654	3.02638	1.0302	3.98541	3.27198	1.21086	0.55027	1.66355
MSTRG.10447.5	0	0	0	0	0	0	0	0	0	0.53259	2.34777	0.488494	0.489003	1.24613	0	0.252867	0	0.491412	1.31686	0.971652	0.229011	0.439108	0.637905	1.28396	6.07189	5.26569	2.10878	5.18808	2.59157	4.2532	0.170887	0.900174	0.04882	6.38568	7.83816	6.37759	1.951	1.88386	7.43825	0	0.583031	1.10449
MSTRG.10448.1	204.053	298.487	281.546	430.42	645.051	643.236	371.24	220.564	317.36	9.55983	17.5394	5.17183	8.8214	5.92823	8.65068	7.67908	12.8818	6.90118	5.69255	12.2209	4.57659	8.83405	13.2591	21.9996	41.276	40.1189	29.8563	28.6678	35.1456	32.0835	0.549286	0.443636	0.678734	1.45346	1.067	1.69314	2.47597	2.23706	2.55251	0.723836	0.30933	1.3849
MSTRG.10449.8	1.73675	2.48814	1.5029	12.54	0.476093	14.8261	10.9306	4.63794	4.86419	0	1.44755	0	0	0.164716	0.323194	0	0.509898	0	0.680908	0.206226	0.441596	1.24836	0.127741	0.564961	0.813704	0.728907	2.06445	9.12799	3.9281	1.26232	0.087694	0.593714	0	0	2.54402	1.3759	0.277383	0	0	7.3e-05	2.66174	0
MSTRG.10449.9	0	0	0	3.047	0	0	1.01247	2.26389	1.09501	6.36731	8.37493	5.50687	3.21363	5.75153	6.27167	6.59105	5.88677	4.38138	1.23715	5.96388	4.17821	3.25196	6.12921	7.05777	21.2051	21.6816	10.0514	17.4245	18.1385	25.2137	0	0.108686	1.00877	5.58972	2.67376	3.50759	1.40856	3.11358	2.4903	5.45189	1.05141	5.96458
MSTRG.10450.1	3.68575	3.56447	3.72703	21.3895	14.0311	15.5498	15.3082	8.83772	10.3576	9.17885	15.5178	7.7488	7.16659	5.97196	7.90808	9.47557	7.01682	5.896	5.12194	8.09034	4.69724	4.37186	10.374	12.3283	20.8848	11.6992	15.7042	22.9501	17.432	17.8787	3.24633	2.66741	3.45947	11.047	8.19086	11.664	8.81844	9.81958	11.1244	5.94412	4.43032	7.6581
MSTRG.10450.2	0	0	0	0	0	0	0	0	0	0	0.05501	0	0.086215	0.032793	0	0.066534	0	0	0	0.028154	0	0	0	0.100093	0.085374	0	0.111169	0.173574	0	0.060295	0.115707	0	0	0.081066	0.362599	0.499177	0.123559	0.069113	0.360515	0	0	0
MSTRG.10453.1	0	1.88526	0	16.6621	6.26774	1.48862	3.51565	2.37732	0.579041	1.36777	8.0069	2.95591	2.86359	2.10778	1.60389	2.87977	3.91171	2.84997	2.23071	4.73992	2.51938	2.46665	5.00671	3.12538	13.6425	9.86613	6.54573	12.6424	10.2632	12.2687	0.251894	0.822987	0.390439	3.56201	2.40984	0.863945	1.38996	2.15143	1.3448	0.271919	0.402233	0.904618
MSTRG.10453.2	3.85783	0.990451	3.79907	0.725503	8.4616	11.2403	7.03205	6.1135	6.63905	2.16126	3.95506	1.5774	2.03676	2.81049	3.32044	1.64867	2.97282	2.411	1.55034	2.68783	1.79056	2.55413	3.3719	5.39768	9.70413	11.8234	6.19153	8.67846	7.21312	11.1687	0.452256	0.240585	0.420716	2.39606	3.28738	0.788502	1.61538	0.872299	2.11841	0.488304	0.805922	0.727144
MSTRG.10453.3	0	0	0	1.33961	0	0	0	0	0	1.24999	1.92376	2.2624	1.62151	1.01071	0.871994	1.18132	1.34693	0.51223	0.930318	1.77706	0.7635	0.731256	1.51138	1.97547	5.28151	2.45385	5.57596	3.97698	6.92104	4.0723	0.269504	0	0.193709	0.57369	0.690536	2.92	0.856013	1.22653	1.97566	0.874647	0.231021	0.151686
MSTRG.10453.4	0	0	0	0	0.815376	3.53481	0.074066	0	0.298065	2.3851	2.71685	0.792697	1.57052	1.48102	2.93581	1.71002	2.79973	1.24058	1.14569	3.61169	2.17897	2.39809	3.19221	3.00358	9.10539	7.78205	8.17172	8.13275	9.6431	8.07415	0.176136	0.03552	0.125371	1.36918	0.921415	3.79021	1.03709	1.80675	2.04457	1.33002	0.561168	1.63911
MSTRG.10455.1	0	2.33397	2.2896	0	1.38401	9.87561	3.38768	3.09127	5.3771	0.539768	0.449978	0.688142	1.5641	1.2329	2.34418	0.562249	2.93345	1.57084	0.397593	2.68902	1.46188	1.80697	0.731736	0.736805	2.02412	2.81751	4.40694	6.60806	1.10604	0.997809	0.79144	0.300036	1.09299	4.1069	9.07069	2.37396	0.692627	1.56013	0.915267	0.986988	1.56993	2.95234
MSTRG.10455.10	0.858249	1.01737	0	0.036753	0	4.11843	0	0	0	0	4.52603	2.29576	4.26478	0	0	0	0.695579	0	0	0	0	0	0	6.71876	15.1168	0	0	18.7206	0	0	2.56549	0.128607	0	0.825001	6.24114	7.532	0	5.11651	8.26234	2.82867	2.36624	5.1952
MSTRG.10455.11	1.9464	0	0	2.11652	3.79414	0	0	0	0	4.25719	6.84223	1.4003	0	0	0	1.79117	0	0	3.90297	0	0	0	8.32905	8.59456	20.9139	16.8529	0	0	19.4595	16.9689	0	0.76592	0	9.5221	0	7.00756	4.15502	7.36129	6.04834	2.02825	0	0
MSTRG.10455.2	0	0	1.12791	2.65057	6.55561	0	3.17116	1.23089	2.13663	2.06383	1.92258	1.3048	0.705066	2.63809	4.12261	1.8903	3.15147	2.95588	2.09472	5.05701	3.0181	3.58686	2.96625	1.70236	4.04233	10.5051	10.519	3.5956	8.05738	8.47471	0.70474	2.27265	2.27828	10.3102	9.44531	3.32521	4.60698	3.78413	2.36708	0.686743	0.732536	1.43232
MSTRG.10459.2	0	0	0	0	0	0	0	0	0	0.252024	0.717816	0.299526	0.388744	0.334676	0.216544	0.406386	0.312914	0.161059	0.183944	0.540391	0.143645	0	0.620817	0.282826	0.87535	1.21873	0.546037	0.618804	0.817355	0.971087	0.3873	0.25959	0.344638	3.42397	1.75588	1.8294	0.818404	1.36966	1.09836	0.301559	0.636521	0.992694
MSTRG.10461.1	0	0	0	0	0	0	0	0	0	0.209745	0.575059	0.020777	0	0.149801	0.112946	0	0.148248	0.412523	0	0.404042	0.188891	0.250643	1.21326	0.791174	0.836612	1.25818	0.902914	0.573683	2.40847	1.85433	0.253095	0.184132	0.382159	3.35285	2.07721	1.68911	1.42953	0.886216	1.01299	0.421786	0.444654	0.601965
MSTRG.10461.2	0	0	0	0	0	0	0	0	0	0.167166	1.19698	0.606907	0.875099	0.139261	0.284229	0	1.17946	0.666873	0.18223	1.88598	0.835773	0.822714	0	1.46782	7.90102	6.54056	4.02243	5.9558	4.22536	5.82641	0.543374	0.659517	0.685805	5.14691	4.91118	3.70393	2.47136	2.48642	3.22786	0.365024	0.388561	0.771269
MSTRG.10462.1	0.201509	0.070586	0.066746	1.72338	2.44235	2.27844	1.38497	0.866876	1.38248	0.542516	1.41453	0.100727	0.467233	0.385201	0.687618	0.192043	0.784862	0.417952	0.346123	0.151733	0.31951	0.302913	1.27867	0.829476	4.50151	5.54701	3.33418	3.6638	2.44426	5.44939	0.150182	0.125613	0.266314	4.90726	2.0146	2.00483	2.41368	2.41024	2.88732	0.913265	0.536921	1.55411
MSTRG.10464.5	0.917216	1.56234	0.675954	6.56482	6.07067	5.51199	3.47194	3.21969	2.63588	2.20947	3.72796	1.77236	1.2557	1.58348	1.48665	1.35732	0.576629	0.527187	0.999372	1.98978	1.10569	0.971418	1.58456	2.28937	7.95245	11.5739	4.8589	4.64781	5.51166	4.6949	0.261266	0.37747	0.602207	7.81283	4.37946	4.14658	3.65815	3.54775	4.42347	2.87958	2.53864	5.25615
MSTRG.10465.3	0	0	0	0	0	0	0	0	0	1.47125	0	0	0	0	1.7717	4.31184	3.85664	5.21274	0	0	0	0	0.821346	5.86156	6.29855	0	12.2855	12.0994	11.7592	14.3138	0.579293	1.17294	1.78617	4.81546	4.82841	3.23012	2.54869	1.50629	2.06904	0	0.798118	2.80568
MSTRG.10465.5	0	0.329062	1.0199	9.85597	15.3738	13.9204	5.15569	1.154	2.10902	0.435276	0.475926	0.67385	2.03829	0.200174	0.08681	1.37675	0.288142	1.05291	0.235878	0.235739	2.71297	1.8873	7.40438	0.357367	9.10629	1.00934	2.39964	2.4927	1.25684	0.801392	0.117739	0.127557	0.983419	1.73749	1.50461	4.16881	0.110152	0.21073	0.27443	2.59085	2.68492	3.35019
MSTRG.10465.7	0	0	0	0	0	0	0	0	0	3.99306	7.21402	4.82725	0.012134	2.79393	2.97027	0	0.043655	0.002026	4.72418	0.004849	0	4.48418	0.907689	0.014221	0.023283	0.079205	0.028293	0.012817	0	0.042467	2.4425	2.09909	0.458346	0.009885	0.024696	0.000736	0.007486	0	0	1.40441	2.22177	0.03398
MSTRG.10465.8	1.38803	1.94766	0	2.21112	1.49689	3.71815	0	2.27542	2.15803	0.134247	2.12922	0.366913	0.077824	0.684345	0.12231	0.879398	0.20559	0.152802	0.768865	3.60715	1.55272	1.42252	0.460629	1.40089	6.07164	13.9008	1.59668	1.42217	3.042	4.51974	0.410239	0.467676	0.317465	1.83981	2.01304	0.944449	0.386472	1.01867	0.881663	3.67667	4.38678	4.75257
MSTRG.10469.1	0	0	0	0	0	0	0	0	0	0.030927	0.047372	0	0	0	0	0.027332	0	0	0	0	0	0	0	0	0	0	0	0	0	0	0.660352	1.28144	2.07582	0	0	0	0	0	0.051329	0	0	0
MSTRG.1047.1	0	0	0	0	0	0	0	0	0	0	0.928894	0.527057	0.102214	0	0.293195	0.139769	0.418146	0.358049	0.350909	0.03904	0.446563	0.720963	0.361925	0.349845	2.51818	1.11666	1.42445	1.44035	1.59231	1.69565	1.27439	0.716462	0.585092	1.69197	1.31346	2.40072	1.36928	0.618452	1.98369	0.464085	0.990266	0.577534
MSTRG.10470.1	0	2.25762	0	0	0	6.52732	0	4.62723	0	0	4.37322	0.288437	1.0252	0.661737	2.40432	1.29477	0.926432	0.44438	1.53408	0	0	0.978225	2.00267	0	5.59943	0	4.42054	4.9345	9.64358	0	1.46747	1.14458	1.53737	4.03393	5.06204	6.19157	3.92387	2.37934	13.8285	0	0	0
MSTRG.10470.2	0	0	0	0	0	0	0	0	0	0	3.17562	0	0.451365	0.889327	0	0.684457	5.10694	1.82622	0.498919	2.396	0.087932	0.64298	0.324842	5.52545	6.12338	0	3.21662	3.25379	3.91405	7.16874	0.820038	1.68135	0.552851	5.80969	4.78943	5.48077	0.940861	1.15892	5.53948	0	0	0
MSTRG.10470.3	9.3296	17.5576	10.0111	38.4521	41.7701	58.9578	23.6019	12.364	17.7479	0.608244	2.17972	0.472339	0.587812	0.766332	0.67116	2.1635	0.942933	0.562515	0.81284	0.740374	0.80785	0.840437	2.1443	0.949537	4.80172	1.65811	1.56099	2.3309	2.39321	1.45582	0.236656	0.02499	0.32362	0.498599	0.786611	1.1681	0.488776	1.88127	0.450899	0.220928	0.417696	0.147152
MSTRG.10470.6	0.009225	0.112956	0.13285	0.07136	0.054638	0.129345	0.061659	0.115245	0.023511	0.248153	0.432	0.195186	0.109433	0.298793	0.085687	0.380114	0.452493	0.268913	0.28608	0.214638	0.622864	0.177517	0.417611	0.376194	0.490724	0.825499	0.981297	0.31067	0.471172	0.971076	0.383102	0.486536	0.666334	2.45569	5.73121	3.84146	1.7468	3.69306	6.14742	3.36767	2.25442	5.23955
MSTRG.10471.1	0.443147	0.95696	0.459763	0.310013	0.563774	0.810713	0.548128	0.63189	0.593149	1.0472	1.53149	0.408249	0.320383	0.756678	0.683114	1.32081	0.840769	0.665709	0.690654	0.34976	0.721683	0.316133	0.74013	0.749801	1.9137	0.828748	1.39488	1.18505	1.28328	1.55382	1.34662	2.48036	2.27154	1.17187	1.64209	1.68492	1.44781	3.2162	5.35569	0.556099	0.49271	1.01189
MSTRG.10473.1	0	0.213648	0	0	0	0	0	0	0	0.25129	0	0.273585	0.895026	0.238664	1.85424	1.4087	0.08673	0	0.238993	0.617898	0	0.931434	0.047144	0	0	0	0	0.021476	0	0	5.08739	0.60232	0.410902	0	0	0	0	0	0	0.070528	0	0
MSTRG.10478.1	0	0.356554	2.23292	1.76042	2.7106	1.47975	2.41986	0.821041	2.06326	0.819803	1.42045	0.551227	0.925598	0.476795	0.938698	0.706711	0.707693	0.797695	0.538945	1.11591	0.610851	0.276623	0.919542	1.87917	2.88736	2.05483	2.70992	2.02959	3.91835	3.10396	0.324867	0.3982	0.544183	0	1.50563	4.98916	2.18414	1.34867	2.00207	0.828154	0.434101	0.988699
MSTRG.10480.1	17.0456	11.6558	26.3947	8.34929	16.8223	13.0343	17.8938	11.7918	12.326	14.1587	20.5264	13.0867	10.8688	11.8042	13.3514	15.4651	10.8806	12.3673	11.0726	13.4053	9.0416	13.4976	20.1688	19.4893	20.0624	18.5661	29.4222	15.9852	24.3801	21.1703	2.66576	1.89182	3.40038	2.38384	2.11842	0	1.95492	3.27496	0	5.10293	4.31401	3.74161
MSTRG.10481.1	0	0	0	0	1.48393	0	0	0	0	0.467529	0.453045	0.459609	0.371322	0.356018	0.505373	0.498157	0.632175	0.632899	0.551302	0.177326	0.108009	0.176527	0.805344	0.59828	2.68813	2.87976	2.7304	1.72618	2.13919	3.1267	0.345463	0	0.41137	4.25031	2.5372	3.51184	1.97305	1.01567	0.621718	0.852135	0.616226	0.699837
MSTRG.10487.1	7.36027	8.97686	3.16418	40.8347	22.2234	26.5768	24.4741	13.9266	12.7799	6.26295	1.85065	3.46316	2.18976	5.19874	2.61443	10.2708	2.74414	2.57338	2.36644	13.0642	3.00547	4.6852	3.36516	5.86787	3.79677	3.68534	4.7575	2.97243	3.90416	3.72924	0.497662	0.501676	0.390021	0.26332	0.425428	1.88831	0.831026	1.2446	0.842704	5.01421	4.36196	2.06574
MSTRG.10487.2	1.13154	1.11191	6.44333	0.163875	2.10748	2.54042	0.861928	0.788658	0.830141	6.78802	1.65952	2.50364	3.05898	4.79256	3.49003	0.28181	3.46419	4.49596	1.66627	1.38872	2.00823	3.43555	3.78559	6.36084	3.24056	3.15664	4.75134	6.18124	3.20337	2.55517	0.375158	0.297051	0.424653	0.208422	0.172242	1.71217	0.016124	1.20398	0.528634	2.48108	3.31052	2.48022
MSTRG.10487.3	0	0	0	0	0	0	0	0	0	4.7432	1.53307	2.29074	5.10815	5.05129	3.23647	0.410009	2.67492	3.45101	2.07699	1.534	3.32304	3.56878	4.37828	4.3785	3.7788	3.50088	5.09924	4.32309	4.30299	3.82438	0.768345	0.640507	0.856692	0.394595	0.540985	1.78213	0.049759	1.56154	0.903167	4.91973	3.81061	1.9119
MSTRG.10487.4	0	0	0	0.181182	0	0	0	0	0	0.858912	1.27903	1.6902	1.16576	1.21386	1.64848	3.3325	1.13506	1.10102	2.96835	3.05473	2.52268	2.13273	3.12615	1.40935	3.95448	3.02225	2.95317	4.34121	4.13345	4.58239	0.126852	0.685726	0.147256	0.266759	1.00416	2.3371	1.0391	0.151627	0.838789	2.02289	4.97466	5.65833
MSTRG.10487.5	0	0	0	0	0	0	0	0	0	0.836835	8.55193	2.02938	1.21467	1.012	1.34411	2.65039	1.14261	1.05307	2.45204	3.11067	1.96372	1.95816	2.85939	1.29763	3.42455	2.62664	2.32707	3.39982	5.06269	3.1494	2.23417	2.40092	3.10999	6.99824	8.86383	2.17416	3.78448	6.92309	10.8962	1.74336	3.95112	3.47991
MSTRG.10487.6	0	0	0	0	0	0	0	0	0	0.784553	3.0431	1.07248	0.401878	0.882874	1.10516	1.91054	0.190826	0.202754	0.260923	0.15959	0.298722	0.543091	0.222162	4.913	2.43605	1.17209	1.73753	0.386236	4.13757	2.46411	1.39683	1.93665	2.31129	4.32841	2.10162	0.496758	2.1786	1.26605	0.19133	0.729937	1.95972	1.47085
MSTRG.10488.2	0	0	0	0	0	0	0	0	0	0	0	0	0	0	0	0	1.30258	0	0	0	0.60314	0	0	0	0	0	0	1.31198	0	4.37528	0	0	0	0	3.07148	0	0	0	0	0	0	0
MSTRG.10489.1	9.39531	22.8486	3.73214	62.7742	52.0814	46.6361	29.6798	16.2674	28.9618	0.461482	3.41882	0.236899	1.03207	1.11098	4.24004	1.44138	0.735929	0.978786	0.242694	1.86572	0.871534	1.6348	1.99328	0.65731	3.41122	6.76867	4.88431	2.31323	11.5464	0	1.21128	1.54449	2.69991	3.262	4.75943	4.6178	2.93351	5.6521	5.5221	1.78972	1.88798	2.58153
MSTRG.1049.1	0.884165	1.25447	0.304876	0.082657	0.817625	0.694798	0.657622	1.28814	1.29683	0.472239	0.436364	0.341067	0.882256	0.70453	1.39381	0.776087	1.56682	1.1133	0.494662	1.48673	0.481911	1.34508	0.62775	0.816511	0.334758	0.599927	0.385021	0.455117	0.728866	0.403502	0.092845	0.052413	0.084949	0.114464	0.107337	0.4052	11.1833	4.12547	1.06489	1.45664	0.632847	0.161316
MSTRG.1049.2	0	0	0	0	0	0	0	0	0	0	0	0	0	0	0.069884	0	0	0	0.658105	0.719887	0	0.494972	0	0	0.075198	0	0	0.335369	0	0.020889	0	0	0.126554	0	0.108994	1.30385	1.67162	0	0	0	0	0
MSTRG.1049.4	0	0	0	0	0	0	0	0	0	0	0	0	0.569825	0	0	0.215415	0.653088	0.504451	0.011075	1.19922	0.239738	0.476439	0.980418	0.647091	0	0.997465	0	0	0	0	0	0.200694	0	0	0	0.042981	4.26345	1.92186	0.163247	0.824266	0	0
MSTRG.10490.1	32.1755	132.593	14.9686	92.9237	152.368	146.262	59.1516	44.6363	91.5021	5.22466	12.1816	3.29299	3.54102	4.31412	9.29702	5.29736	9.33508	4.50423	4.14757	7.43375	2.43139	5.1172	11.2701	7.94639	43.2953	34.663	27.1665	31.3179	30.4742	38.1197	1.11688	1.48637	0	0	8.73318	8.2591	3.87858	4.83433	6.36619	4.13627	3.79093	5.20876
MSTRG.10491.1	10.4151	28.0078	21.0566	21.3221	21.8689	28.1808	13.1563	35.2788	42.221	0	0	0	0	0	0	0	0	0	0	4.06094	0	2.62856	4.00517	0	13.6924	24.1675	17.191	0	0	0	1.15383	1.75413	2.14131	4.42577	0	4.44423	7.5997	7.35985	7.57258	0	0	0
MSTRG.10491.2	10.9953	0	5.73806	0	0	0	13.8483	0	0	0	0	0	0	0	0	0	0	0	0	0.291101	0	0.187686	0.286249	0	0.821848	1.73155	1.03201	0	0	0	0.00348	0.017838	0.005326	0.009344	1.05409	0.008921	0	0.013162	0.011726	0	0	0
MSTRG.10492.1	0	0	0	0	10.0004	0	0	0	0	0	1.74954	0.343713	0.374222	0	0	0.94592	0	1.46003	0	1.8061	1.18964	0	1.42705	0	2.12923	3.65765	3.34735	2.48044	1.66706	1.90262	1.27995	1.10011	0.773662	10.1123	10.2656	4.37159	2.65553	2.52016	1.82007	5.10403	1.32775	7.17049
MSTRG.10492.3	0	0	0	0	0	0	0	0	0	1.40824	1.27229	0.364075	0	0.314506	0	0	0	0	0	0	0	0.003696	0	0	0	0	0	0	0	0	0.289752	0.265782	0.644971	3.41468	2.39854	7.8811	2.63886	2.0993	2.58628	2.23707	2.83648	3.64111
MSTRG.10495.1	0	0	0	0	0	0	0	0	0	0.074125	0.303268	0	0	0.043545	0	0	0	0	0	0.101979	0	0.035404	0	0	0.153873	0.232598	0	0.191218	0.071962	0.149642	0.124005	0.106209	0.284158	0.27439	0	0.053867	0.223318	0.084066	0.138986	0	0	0.118756
MSTRG.10495.3	0.43547	0.420516	0	2.02905	0.814702	2.4486	0.915105	0.253847	0.514793	0.744934	3.36554	0.350183	0.35997	0.152531	1.2718	0.376147	0.553199	0.285254	0.093107	0.609031	0.102908	0.217151	0.448259	0.384194	3.95291	5.06766	1.69271	4.19714	3.13929	2.76073	0.274114	0.778754	1.04293	6.21259	5.24017	6.94756	2.7451	4.18509	4.57498	1.79598	1.37426	4.81548
MSTRG.10496.1	0	0	0	1.00983	0.521324	2.52746	1.54479	0	0.175684	0.107843	0.020471	0.109522	0.058693	0.080235	0	0	0	0	0.061237	0.230519	0.085586	0.17978	0.207793	0.118892	1.18212	0.583655	0.370833	0.104054	0.320772	0.597762	0.091007	0.62283	0.061073	0.392553	0.616067	0.541263	0.262263	0.346905	0.52379	0.18688	0.150138	0.280409
MSTRG.10496.11	0	0	0.248437	0.528956	0.581284	0	0.482444	0.467336	0.606996	0.781512	0.809367	0.564468	0.565131	0.524028	0.93348	0.55847	0.311538	0.383309	0.239429	0.768188	0.449439	0.545683	0.522466	0.768048	1.89939	3.00363	2.19309	1.10945	1.49271	1.98964	0.264605	0.363717	0.524376	4.44866	4.8517	3.45093	2.65501	1.88547	3.45564	1.88499	2.33279	3.99377
MSTRG.10496.12	0	0	0	0	0	0	0	0	0	0	0	0	0	0	0	0	0	0	0	0	0	0	0.040945	0	0	0	0	0	0	0.045872	0	0.249026	0	0	0	0.133721	0.103495	0.224866	0.001482	0.007775	0	0
MSTRG.10496.2	0	0	0	0	0	0	0	0	0.116094	0	0.042466	0	0.397073	0.371957	0.385246	0	0	0.004411	0.025251	0.801975	0.07727	0.133934	0.520803	0.810286	1.22041	1.16846	0.534235	0.387174	1.37078	1.97002	0.32425	0.312116	0.883335	1.01915	1.85231	0.430195	2.02854	0.101961	0.305472	0.237957	0.463107	0.108866
MSTRG.10496.3	0	0	0	1.90603	3.38271	0	0.677766	0.849036	1.55966	0.240934	0.339518	0.19035	0.10612	0.182335	0.475199	0.216116	0.145587	0.065695	0.08219	0.200563	0.141118	0.087445	0.134011	0.108441	0.634207	0.91494	0.583439	0.451542	0.353556	1.70634	0.094927	0.196376	0.253293	1.95638	2.13006	1.59404	0.730277	1.00449	1.26574	1.33208	1.22344	2.90651
MSTRG.10496.4	0	0	0	0	0	0	0	0	0	0.055894	0.004145	0.016813	0.026181	0.018694	0	0.062161	0.040202	0.029836	0.00377	0.060099	0.007651	0.028434	0.031824	0.065097	2.47215	1.49811	0.501483	0.064199	0.05316	1.95659	0.017254	0.021969	0.011985	0.110701	0.412258	0.098764	0.05678	0.049645	0.062516	0.156827	0.066591	0.177744
MSTRG.10496.5	0	0	0	0	0	0	0	0	0	0.066171	0.04908	0.087819	0.025189	0.023714	0.021724	0.083722	0.074647	0.014987	0.052684	0.089108	0.023752	0	0.032501	0.148844	0.232986	0.238097	0.226332	0.1785	0.130699	0.497585	0.044304	0.045853	0.091499	0.726082	0.570245	0.891648	0.177284	0.452232	1.01444	0.24228	0.139485	0.429789
MSTRG.10496.6	0	0	0	0	0	0	0	0	0	0.038302	0.023177	0	0	0	0.015741	0.116735	0.451795	8e-05	0.174199	0.141297	0.337827	0	0.122735	0	0.419275	0.137367	0.250211	0.755673	0	0.180879	0.08039	0.033035	0.177027	0.219309	0.112043	0.223099	0.043358	0.130722	0.038409	0.297695	0	0
MSTRG.10496.7	0	0	0	0.074493	0.038799	0	0.033352	0	1.11743	0.109773	1.02682	0.463957	0.144793	0.27818	0.904072	0.558466	0.475756	0.097647	0.317518	0.074938	0.026733	0.017899	0.328747	0.127976	0.37211	1.10032	0.041197	0	1.59743	0.516363	0.070109	0	0.640265	2.52497	1.65223	2.36356	0.218551	1.06508	1.10649	0.244582	0.052751	0.250636
MSTRG.10498.3	0	0.208816	0.041728	0.271317	0.509622	0.121844	0.219661	0.088489	0.154264	0	0	0	0	0	0	0	0	0	0	0	0.018435	0	0	0	0.202229	0	0	0	0	0	2.17005	0.357969	4.04981	1.30585	46.807	35.2536	43.6666	0.952491	19.9229	0.068142	0.016279	0
MSTRG.10499.1	1.98561	3.12843	1.21921	15.2538	19.3189	13.872	8.30993	7.63725	4.02612	5.04007	12.365	3.84219	3.7779	3.7544	5.61725	4.68099	6.52667	3.49211	3.05435	5.05727	2.60293	3.74371	7.59304	7.97838	26.4414	25.144	11.8662	22.5546	17.6217	29.5327	1.25445	1.85155	2.29555	17.8405	14.193	14.1542	6.26018	7.08972	7.22193	6.69158	4.41029	11.5715
MSTRG.10505.1	0.627356	1.10255	0.554176	4.08042	4.44515	4.22842	2.07559	1.56954	2.72719	0.47118	1.64637	0.685119	0.619482	0.785513	0.75498	0.598171	0.506639	0.509988	0.358376	0.703	0.393255	0.590642	0.648216	1.2491	3.83928	4.6099	3.42355	2.50964	2.85245	3.54533	0.535878	0.661701	0.701994	4.66702	4.46166	3.06836	1.99811	1.76222	2.5577	2.1645	1.85514	3.53477
MSTRG.10506.1	1.00858	2.48364	0.481506	5.91869	6.30085	9.56471	2.95503	1.60958	2.81044	1.19483	2.23415	0.917016	1.00329	1.42525	1.27031	0.455156	1.4304	0.860804	0.84674	0.585511	0.646519	0.927682	1.08407	1.24734	6.01047	6.47905	3.76571	3.22283	1.90385	4.02871	0.686033	0.757429	1.68934	6.07455	2.61898	4.68279	0.722446	0.893432	1.07828	2.71241	2.08686	1.5667
MSTRG.10506.2	0	0	0	0	0	0	0	0	0	0	0	0	0	0	0	0	0	0	0	0	0	0	0	0	0	0	0	0	0	0	0.38188	0.771261	0.423709	0.512815	5.29184	1.95715	2.39832	2.43199	1.92336	0	0	1.83188
MSTRG.10509.1	1.94274	6.22931	2.82685	22.2127	20.0069	22.2002	10.7064	7.60724	5.7542	3.07397	5.67232	2.53441	2.90032	2.40406	3.30568	3.09257	2.03695	0.965875	1.70688	3.98453	1.8711	2.91991	3.91213	4.78629	17.4909	21.5707	15.5137	7.47917	12.3034	18.824	1.3768	1.97103	2.60172	15.2362	14.6064	13.4623	5.83031	5.16007	3.66831	4.88168	5.3911	7.94119
MSTRG.10509.2	0	0	0	0	0	0	0.614484	0	0	0	0	0	0	0	0	0	0	0	0	0	0	0	0	0	0	0	0	0	0	0	0	0.011924	0.010071	0	0	0	0	0.006298	7.48535	0	0	0.008132
MSTRG.10510.1	0	0	0	0	0	0	0	0	0	0.543903	0.936779	1.28419	0.356263	0.721823	0.538147	0.750249	0.426077	0.299553	0.421963	0.456098	0.507678	0.5481	0.711261	0.789752	2.60042	4.85697	1.7648	0.879069	1.95598	1.47066	0.09669	0.353127	0.886525	6.13349	7.74288	3.617	1.97794	0	2.25613	3.79846	2.79247	3.4881
MSTRG.10512.3	0	0	0	0	10.2297	0	0	0	9.04969	0.014038	2.91131	0.002031	0.055278	0.033204	0	2.64847	0	1.91077	0.014277	0.009585	0.026736	0.032306	2.64562	0.02695	0	0.078522	0.012705	0.097583	0.025791	1.76113	0	1.1284	1.41383	1.2086	0	0.008308	2.37314	0	2.10095	1.67459	0.230785	0.415835
MSTRG.10512.5	0	0	0	0	0	0	0	0	0	0.871147	2.23672	1.66563	1.07917	0.536529	1.44676	1.55288	1.58611	1.62814	1.62377	1.61769	1.00964	0.777631	1.8539	1.16382	3.72914	4.70068	2.77995	1.61044	3.06766	4.60486	1.41041	2.04089	1.8495	3.54382	2.85551	1.94278	3.07062	2.50082	3.69996	1.09227	1.24854	0
MSTRG.10513.1	18.1473	13.9815	7.22387	23.0699	24.6756	34.7248	29.0654	9.50841	11.4515	3.15764	5.51842	2.7734	2.84833	2.58191	2.87071	2.0448	2.57748	1.51134	1.91141	3.1488	1.96943	2.50012	2.62016	3.24142	10.3309	9.25821	9.85991	9.42114	8.36621	7.63891	0.50877	0.782431	0.858419	4.07328	2.83314	1.89484	2.42059	1.47044	1.91663	1.62671	1.26344	2.14832
MSTRG.10517.1	0	0	0	0	0	0	0	0	0	0	0	0	0	0.021464	0	0	0.037701	0	0	0	0.402068	0	0	0	0	0	0.010956	0.000499	0	0.026825	0.033853	0.91553	1.24775	0	0	0	0.054464	0.055035	0.343128	0.010149	0.427239	0.005362
MSTRG.10517.2	0.28304	0.096388	0.025539	1.26111	0.776397	0.566694	0.654157	0.554871	0.478204	0.068376	0.209424	0.021165	0.047084	0.195229	0.010754	0.011541	0.088376	0.015172	0.012922	0.023479	0	0.030568	0.156266	0.373781	0.23991	0.34119	0.158032	0.644961	0.117955	0.353777	0.977445	1.37201	1.60596	0.424579	0.822089	0.78277	0.046472	0.085987	0.166075	0.561389	0.041733	1.37425
MSTRG.10519.1	0.751248	0.828669	1.0185	2.56066	6.96546	8.7231	0.77656	3.10423	2.72227	0.757806	1.28652	0.419797	0.412156	0.638822	0.497073	0.409545	1.15949	0.899925	0.428543	1.17207	0.538869	0.570902	0.804668	0.994072	5.5348	2.90073	2.14451	2.35846	3.87996	4.77308	0.830466	1.22527	1.58748	4.0089	4.6673	4.39334	1.2348	1.55615	1.72523	2.64016	1.5614	2.93848
MSTRG.10519.10	0	0	0	0	0	0	0	0	0	0.055477	0.356758	0	0.122288	0.116397	0	0	1.0108	0.050425	0.164249	0.833654	0.494578	0.51071	0.84384	1.46762	3.88249	2.79943	2.63219	4.187	1.88382	1.58559	1.00883	1.79852	1.86278	7.90009	6.19002	5.12658	4.38575	3.72491	6.24752	0.023167	0.023477	0.200596
MSTRG.10519.16	0.142674	0.185681	0.163497	0.293772	0.513228	0.468801	0.162494	0.332684	0.519154	0.272082	0.609452	0.328474	0.268684	0.346884	0.323875	0.239549	0.336415	0.212076	0.250381	0.410147	0.296049	0.278361	0.417335	0.496154	1.60093	1.95618	1.30049	0.969064	1.24517	1.3706	0.422577	0.738537	0.70087	3.42187	3.9745	2.35496	1.16624	1.56339	1.73389	3.15952	2.67908	4.62057
MSTRG.10519.2	0	0	0	0	1.62682	1.13382	0	0	0.238966	0.032888	0.005002	0.188951	0.009034	0.019261	0	0	0.00777	0.015841	0.006607	0.009582	0.008664	0.085546	0.00807	0.011595	0.011711	0.015766	0.00985	0.234917	0.011699	0.424573	0.095142	0.039392	0.10423	0.049748	0.220093	0.150747	0.023017	0.291909	0.169117	0.36955	0.393172	0.582595
MSTRG.10519.9	0	0	0	0	0	0	0	0	0	0.055195	0.475159	0	0.743871	0.17374	0	0	1.17228	0.053664	0.165888	0.505745	0.559134	0.747314	0.455817	2.26114	4.2548	4.16796	3.29178	4.05378	5.25341	3.3182	0.924011	1.27426	2.29601	11.8813	8.46723	5.4504	4.46376	5.56997	8.45955	0.031592	0.026345	0.30781
MSTRG.10520.1	1.36649	2.27523	0.555664	5.0071	3.97822	4.53506	2.34273	2.16483	3.74228	1.06135	2.28911	0.785667	0.807235	0.322649	1.14252	0.852198	0.622478	0.747439	0.696692	1.39541	0.739656	1.00533	1.03275	1.02877	4.19496	3.41176	3.22658	2.687	2.94681	3.86045	0.58671	0.168606	0.873188	0.976249	3.73269	2.87473	2.6072	0.420915	0	1.81311	1.1496	2.71265
MSTRG.10520.3	0	0	0	0	0	0	0	0	0	0	0	0	0	0	0	0	0	0	0	0	0	0	0	0	0	0	0	0	0	0	0	0	0	0	0	0	0	0	5.13988	0	0	0
MSTRG.10520.4	0	0	0.365418	0	0	0	0	0	0	0.162934	0	0.154379	0.116989	0.797946	0.391154	0.167391	0.437795	0.104133	0.223428	0	0.040695	0.104402	0.169034	0.140259	0.368448	1.24059	0.275717	1.36806	0.44888	0.185437	0	0.460903	0	2.98595	0.166845	0.276603	0.099589	2.67336	0.873288	0	0.438815	0.257602
MSTRG.10522.2	0	0	0	0	0	0	0	0	0	0.055177	0.14794	0.018291	0.029116	0	0.031542	0.078258	0.34809	0.102562	0.121742	0.080928	0.087923	0	0.085084	0.21707	0	0.98301	0.266333	0.078607	0.027638	0.253776	0.122333	1.88896	3.20043	0.175766	0.33097	0.077098	0.241126	0.129163	0.022825	0.116658	0	0.233239
MSTRG.10523.1	0	0	0	0	0	0	0	0	0	0	0	0	0	0	0	0.00159	0	0	0	0	0.025569	0	0	0	0.003313	0.005883	0.021436	0.013489	0	0	0.834685	1.63825	0.712353	0.464439	0.061529	0.035137	0	0	0.01895	0.165269	0	0
MSTRG.10523.4	0	0	0	0.856794	0	0	0	0	0	9.52879	16.1936	10.0977	10.4706	7.03658	10.7877	12.5006	8.26726	6.11538	3.41093	12.8144	5.57987	11.1158	13.9502	8.53184	6.43936	4.50365	19.3311	26.7392	23.2247	15.0283	5.42187	3.48158	6.0969	4.97242	4.61204	7.57012	1.33686	1.18283	1.79007	4.94153	10.5476	6.42202
MSTRG.10523.5	0.270756	0.745637	0	4.5708	1.97676	2.33892	1.08996	2.67391	4.22768	0.147892	0.23994	0.034363	0.023161	0.047882	0.234399	0.369246	0.080445	0.03986	0.025835	0.027386	0	0.112467	0.103842	0.013943	3.53683	0.565095	0.079237	0.21836	0.082266	0.097254	1.48131	4.0392	2.50766	0.1496	0.173348	0.103962	0.103625	0.036453	0.157789	0.113134	0.212033	0.069067
MSTRG.10523.6	0	0	0	0	0	0	0	0	0	0	1.07551	0.301832	0.070394	0.029706	0	1.00667	0	0.052751	0	0.275705	0	0	0	0.383412	3.54674	3.46985	0	1.14152	0.180784	0.83517	2.24916	4.6705	2.61673	1.72848	0.82076	0.388869	0	0.024863	0.299489	0	0	0
MSTRG.10523.7	0.077959	0.532353	0.03989	1.85269	3.23619	3.66751	1.92829	0.328918	0.172609	0.397215	0.863333	0.430226	0.392233	0.380585	0.568551	0.920318	0.203634	0.178215	0.218878	0.375189	0.173944	0.284461	0.329143	0.392424	1.20982	1.91642	0.679772	0.978383	0.795364	1.63039	2.26419	4.64697	2.49499	2.86025	5.09016	2.51638	0.391762	1.01926	0.948375	2.53383	1.79368	2.31688
MSTRG.10523.8	0	0	0	0	0	0	0	0	0	0.000927	0.008554	0.00354	0	0.002895	0	0	0	0	0	0	0	0	0.004411	0	0	0.007443	0.014999	0.003266	0.005529	0.002338	1.58198	7.38592	3.52435	0.030741	0	0.036345	0	0	0.012761	0	0	0.014317
MSTRG.10524.1	5.54203	11.759	3.29937	32.6108	30.2827	36.0921	18.7624	11.5153	16.3679	9.99677	19.4583	9.02423	11.4186	10.1786	18.4806	12.3198	12.8966	9.68353	7.02055	13.3909	7.0871	12.9605	14.638	11.7958	28.3925	21.3094	20.8915	34.2243	23.1484	24.7768	4.7515	6.66275	6.76386	7.04587	8.42655	9.87193	1.30722	1.9608	2.81619	5.57628	8.60313	6.84241
MSTRG.10525.1	0	0	0	0	0	0	0	0	0	0	0	0.216572	0	0.305347	0	0.211221	0	0	0	0	0	0	0	0	0	1.20187	0	0	0	0	1.2146	1.99522	1.67821	2.31799	3.24691	1.13487	0.33556	0.819664	0.672686	2.88516	2.12191	0.860818
MSTRG.10527.1	0	0	0	0	0	0	0	0	0	8.99182	1.98897	1.19548	1.65309	7.47474	1.10098	0.869545	2.84891	4.96889	1.96574	4.37433	2.75445	2.74517	3.86955	4.69915	0	0.221552	0.0367	0.160381	0	0.008357	2.43458	0.440395	0.71679	0.164654	0.220172	0.007231	0.033272	0.004467	0	1.03877	1.83736	0.76666
MSTRG.10531.1	0	0	0	0	0	0	0	0	0	0	0	0	0	0	0	0	0	0	0	0	0.215017	0	0	0	0	8.43118	1.1632	0	0	0	0	0	0	0	4.86462	0	0	0.087356	4.38815	0.27897	1.27207	0
MSTRG.10531.3	0	0	0	0	0	0	0	0	0	0	0	0	0	0	0	0	0	0	0	0	0	0	0	0	0	0	0	0	0	0	0	0	0	6.93521	0	0	0	0	0	0	0	0
MSTRG.10536.1	0.633835	1.83343	0.479599	4.7924	6.41095	6.38594	2.74685	1.56552	3.60784	1.46931	2.15324	1.20923	0.827946	1.47383	1.09982	0.840774	1.78728	0.804076	1.12007	1.09003	0.846765	1.11947	1.40113	1.94915	6.20191	4.77751	4.02358	3.64791	4.12915	5.57628	0.297969	0.248741	0.494575	3.45829	3.53702	1.62877	2.55114	2.56516	1.40901	2.13591	1.8145	2.45148
MSTRG.10537.1	1.93175	1.91923	0.811381	7.77104	8.07156	7.61669	8.89803	4.08856	5.93717	0.075668	9.76058	0.042257	3.02372	0.067455	1.16435	3.90517	2.56706	1.53033	0.080209	0.115278	0.317805	2.70324	3.3061	0.08479	0.753604	0.533306	4.24243	0.29109	0.293755	8.79161	0.744868	0.742541	2.28121	16.1273	9.01528	9.51418	7.82457	10.3193	5.7011	5.16587	0.09938	6.61267
MSTRG.10537.2	0	0	0.32932	0	0	0	0	0	0	5.54322	0	4.47345	0	3.71638	1.72711	0	0	0	3.20885	5.10975	2.772	0	0	0	15.0663	16.1935	7.6736	0	4.16374	3.94467	0.897065	1.84027	2.79029	6.95333	4.30091	5.20981	1.63208	1.91542	5.31848	1.85088	2.84811	0
MSTRG.10537.4	0	0.166348	0.118576	0.323318	0.630068	1.11665	0.151164	0.264766	0.27674	0.107848	0.17681	0.690768	0.40566	0.096577	0.185916	0.061446	0.422477	0.556055	0.110367	0.199704	0.480407	0.689345	0.364689	0.082762	0.248294	0.946164	0.270677	0.187276	0.225214	0.386017	0.23316	0.496631	0.59967	3.6452	3.2731	1.95091	0.891675	0.850705	1.072	6.00558	5.84982	6.05272
MSTRG.10545.2	0	0	0	0	0	0	0	0.106451	0	0.770954	0.745545	0.399875	0.419584	0.421337	0.023775	0.453681	0.077968	0.093814	0.085708	0.325995	0.334069	0	0.218931	0.607017	2.37585	2.33659	1.2207	1.75493	2.01959	1.64612	0.402222	0.588764	0.662305	4.51977	5.04132	4.08274	1.43891	3.18035	2.45962	0.900177	1.21728	3.25734
MSTRG.10545.3	0	0	0	0.175362	0.097193	0.147354	0.113533	0	0.024181	0.017924	0.233493	0.013503	0.009472	0.021278	0.251441	0.017472	0.019124	0.068363	0	0	0	0.126954	0.034486	0.010725	0.325778	0.528196	0.091153	0.091595	0.577517	0.180133	0.086916	0.076266	0.119068	0.967361	1.3001	0.931286	0.470849	0.865017	0.923433	0.915654	0.647241	1.51665
MSTRG.1055.1	0	0	0	0	0	0	0	0	0	0.074379	0.235966	0.181127	0.134788	0.084234	0	0.148496	0.034487	0.09039	0.039805	0.16953	0.129272	0.022817	0.140974	0.207943	0.466799	0	0.352633	0.3952	0.425711	0.365942	2.11186	2.58304	3.04262	3.0926	8.57284	6.59087	8.12407	9.10737	9.8688	0.07768	0.135211	0.208726
MSTRG.1055.4	0.022895	0.045077	0.072294	0.047525	0.028312	0.051291	0.046609	0.069751	0.014955	0.137547	0.118358	0.140803	0.117718	0.141835	0.19786	0.097767	0.184306	0.152787	0.240219	0.196111	0.279301	0.278431	0.139822	0.269578	0.44344	0.690408	0.302387	0.214768	0.403667	0.340706	0.179169	0.268385	0.360072	1.51314	2.52876	1.08868	1.87615	1.29014	3.45867	6.0899	5.90733	6.28504
MSTRG.10557.1	0	0	0	0	0	0	0	0	0	0.562809	0.484527	1.67119	1.46842	1.51966	0	1.11481	0.840554	0.780614	0.674858	0.914924	0.809083	1.2114	0.30538	1.31699	5.50659	4.02415	3.61931	3.90304	4.36714	3.18107	1.13579	0	1.35706	8.31058	3.41184	2.66731	2.30203	2.2819	4.84276	4.89157	2.34146	3.41502
MSTRG.1056.1	0.018953	0.0322	0.052946	0.0242	0.018568	0.026272	0.044087	0.052395	0.010174	0.05551	0.029153	0.086554	0.03566	0.039966	0.032164	0.038698	0.073335	0.046483	0.111626	0.080295	0.145747	0.126058	0.049356	0.082423	0.055674	0.227867	0.061132	0.043909	0.067394	0.103945	0.192218	0.349174	0.366277	1.37781	2.30659	0.958799	1.72906	1.26775	2.80267	6.74104	6.78326	6.58584
MSTRG.10561.1	0	0	0	0	0	0	0	0	0	0.012518	0.345648	0.013473	0.018648	0	0.008643	0.008271	0	0.004635	0.013661	0.007255	0.010342	0.011621	0	0.004738	0.002356	0.0084	0.011319	0	0	0.017499	8.30572	0	0	0	0.012802	0.842719	3.42394	0.021871	0.018381	3.62249	0.085249	0.045997
MSTRG.10561.5	0	0	0	0	0	0	0	0	0	0.008576	0	0.039286	0	0.001829	0	0.019595	0	0.01559	0.017669	0	0.028519	0.01136	0	0.004864	0.022717	0.013206	0.014399	0	0.024422	0.052621	0	0	8.63839	0.050323	0	0.052845	0.126377	0.063715	0	0.50569	0.609398	0.261014
MSTRG.10561.6	0	0	0	0	0	0	0	0	0	0	0.018368	0.0374	0	0.051959	0.014979	0.016231	0.069304	0.02321	0.025271	0	0.047514	0.085949	0.059185	0.0761	0.007188	0.279342	0.084145	0	0.116687	0.033817	0	11.4283	9.65943	0.050689	0	0.093877	0.365886	0.320309	0.045192	3.19425	6.58536	2.49118
MSTRG.10562.1	65.1581	52.5894	67.9324	108.388	197.557	193.119	128.371	44.4087	95.5473	37.4845	81.802	20.8027	34.637	41.4758	39.5167	30.1295	46.9965	26.4918	26.0981	43.8309	35.5109	36.4023	53.8165	74.753	189.87	179.787	144.538	134.523	129.689	147.759	3.35599	3.69588	5.49477	11.0742	14.9163	10.7341	25.1622	18.1043	15.1131	26.1854	17.4529	19.6754
MSTRG.10563.1	0	0	0	0	0	0	0	0	0	1.15594	0.326337	0.820187	2.7413	1.2759	1.54764	1.95445	1.12364	0.710343	0.683862	2.28762	0.843514	0.9419	0.617349	0.225487	0	0	0	0	0	0	2.38061	5.3749	2.15883	0	0	0	0	0	0	1.27988	2.35852	0
MSTRG.10563.2	0	44.4001	1.49376	0.888779	0.436259	0.612411	7.42271	10.6047	18.3219	2.83688	1.43111	5.86021	7.67324	2.96226	3.91719	16.3154	3.94987	3.83298	1.87333	6.62737	2.07477	6.26574	3.73586	2.18135	0	0.081238	0.127121	0	0.059381	0.066639	2.28048	2.20811	2.02594	0	0	0	0.13165	0.227803	0.441289	2.38875	4.13326	2.18174
MSTRG.10563.3	0	0	0	0	0	0	0	0	0	0.837237	0.213385	0.505025	1.19664	0.572145	0.597078	1.59057	0.791746	0.241136	0.612511	1.19686	0.370931	0.506339	0.29	0.180107	0	0	0	0	0	0	0.166405	0.023681	1.25124	0	0	0	0.022319	0	0	0	0	0.600506
MSTRG.10563.4	0	0	0.885523	0	0	0	0	0	0	0.307098	0	0	0.370018	0.184379	0.029003	0.063075	0.396525	0.033811	0	0.566019	0.369738	0.575935	0.0914	0	0	0	0	0	0	0	0.265454	0.015434	0.513816	0	0	0	0	0	0	0.04898	0.05446	0
MSTRG.10563.5	0	0	16.1482	0	0	0	0	0	0	12.8489	6.06367	9.55828	37.8993	16.2517	13.7606	37.5621	26.5065	10.7643	9.95263	33.7622	11.2988	19.8783	9.95505	4.70824	0	0	0.144835	0	0	0.05107	3.25039	1.20581	4.02549	0	0	0	0.27671	0.237059	0.515787	4.94239	5.08282	0
MSTRG.10563.6	0	0	0	0	0	0	0	0	0	1.17453	0.106339	0.439207	1.05046	0.632375	0.554281	0.984625	0.62011	0.133866	0.573758	1.20852	0.354014	0.503727	0.223896	0.113577	0	0	0	0	0	0	1.03368	2.88534	1.94456	0	0	0	0.006862	0	0	0	0	0
MSTRG.10563.7	0	0	0	0	0	0	0	0	0	1.41432	0.991396	0.885424	2.22559	1.6424	1.09754	3.78221	1.60709	0.648127	1.00456	1.87068	0.675486	0.724727	0.403861	0.278377	0	0	0	0	0	0	5.63881	2.96869	8.6822	0	0	0	0	0	0	2.11828	2.95214	0
MSTRG.10563.8	0	0	0	0	0	0	0	0	0	0.95183	0.159175	0.681774	1.93631	0.840002	0.880539	6.79408	1.75336	0.313568	0.51356	3.41473	1.29395	2.46447	0.444183	0.207391	0	0	0	0	0	0	7.95095	2.47994	7.77781	0	0	0	0	0	0	0	0	0
MSTRG.10563.9	0	0	0	0	0	0	0	0	0	0.140352	0	0	0.305681	0.019441	0.010309	0.018587	0.107304	0.015954	0	0.124767	0.213274	0.088904	0.070138	0	0	0	0	0	0	0	3.64389	1.07648	3.14991	0	0	0	0	0	0	0.015613	0.017982	0
MSTRG.10564.1	11.1051	18.1778	10.998	0	0.279436	0	3.38977	1.6505	3.62659	8.13302	3.67932	7.28564	12.8065	8.3231	5.09379	12.8206	6.13037	4.31817	4.79353	5.48942	4.73792	6.36219	5.12477	4.4692	0.038828	0.144516	0.699051	0	0.075269	0.193203	1.07757	0.408142	2.02248	0	0	0	0.205244	0.195993	0.456848	4.90381	4.3708	0.652725
MSTRG.10565.1	0	0.151594	0.081939	1.57169	0.301391	0.61866	0.76968	0	0	0.297011	3.40698	0.732917	0.528521	0.408493	1.84864	0.746207	1.18936	1.1503	0.787573	2.23059	0.435607	1.27395	2.49088	1.70164	4.66095	5.35312	3.7178	5.42346	3.30561	8.03599	0.775493	0.936749	0.305913	3.27167	3.82925	2.53039	0.71848	2.35312	2.75293	0.332247	0.407799	1.93653
MSTRG.10567.1	3.64918	4.93772	3.98515	13.872	15.3528	19.0117	11.7212	8.78669	10.9066	0.9089	2.25072	1.89651	2.12958	1.2368	1.17928	1.49184	7.46844	2.98747	0.559814	0.97916	1.36795	1.08343	0.547824	2.04842	2.61647	2.31288	2.57777	3.37615	6.35148	3.38012	0.824095	0.563233	2.81663	1.48704	0.590844	2.64041	2.0858	2.80207	2.46226	8.65926	4.21504	5.15042
MSTRG.10567.2	0	0	0	0	0	0	0	0	0	13.3353	20.1044	9.46159	8.14167	8.58979	9.53657	11.3392	0.041416	2.54557	7.30994	12.2074	7.15484	6.31139	8.75822	17.5272	24.6007	17.0826	20.9995	20.3393	22.8923	18.404	10.1526	15.6787	11.4586	41.2782	34.9515	23.4701	50.9148	58.7067	72.0108	32.1793	28.5949	37.1762
MSTRG.10570.1	0	0	0	0	0	0	0	0	0	0.620202	20.2473	0.674217	0.423844	0.428663	9.83138	0.223817	0.249793	9.83722	0.150555	20.3113	9.63768	0	16.4778	0.307985	1.03041	0.789122	45.469	0.509824	11.5335	53.9421	40.928	91.562	53.8403	166.024	95.7847	38.056	106.494	132.203	161.95	9.25106	9.83353	0.635396
MSTRG.10570.3	7.84509	1.28325	0.834184	30.8571	15.5182	10.2136	3.08151	0.994995	2.39526	4.29895	42.3799	1.58551	2.6312	6.07453	20.2316	3.79018	4.09532	18.8534	2.3545	44.0628	21.4621	1.78675	40.3933	5.02876	34.2934	38.4851	236.262	21.3503	109.164	174.238	101.202	226.717	284.574	973.996	675.487	670.39	1043.77	842.015	931.088	18.6939	13.15	10.941
MSTRG.10570.4	0	0	0	0	0	0	0	0	0	0.360463	0.273343	0.59858	0.267017	0.370332	0	0.205552	0.156435	0	0.226768	0.363017	0.231229	0.268468	0.136751	0.352304	0.665185	1.24201	0.977139	0.252431	0.327464	0.522241	1.55858	1.24359	81.2087	4.26143	6.10854	4.27846	1.87975	3.71673	6.7794	1.8621	1.32407	4.09941
MSTRG.10571.7	0	0	0.464538	0	0	2.28002	0	0	0	7.61508	5.03261	3.32215	3.3629	4.76279	1.43261	1.52368	3.93477	1.93074	5.95721	7.69637	5.2826	7.61321	11.9053	3.93286	17.2106	8.15819	10.9376	13.7689	12.1336	9.67459	1.30681	2.55031	3.18965	4.92349	5.80457	9.18104	5.39811	13.0653	7.57775	1.18023	0.738522	1.88277
MSTRG.10571.8	0	0	0	1.41701	0	0	0	0	1.64833	2.45957	18.6249	2.28893	1.14588	2.08456	4.3523	2.39306	5.1361	0.867195	0	6.63217	1.15088	4.55909	3.29007	6.66957	26.5581	18.2679	7.43696	22.115	2.77519	18.4127	0.402795	0.480596	0.094288	0.666229	0.216473	0.440345	0.191655	0.913109	0.699944	0.445403	0.764812	0.72336
MSTRG.10571.9	4.39667	3.7435	2.05777	27.5379	13.8015	12.6692	0	4.52258	9.35177	0.252773	7.81713	0.288206	0.791356	0.841154	1.17382	0.599939	2.03264	0.15085	0.007714	1.70306	0.557766	0.008553	2.17206	1.30099	5.74962	0.379655	5.83435	9.0142	7.86336	7.05221	0.249005	0.132254	0.357693	2.53041	1.00769	4.42089	0.251846	0.528997	0.539946	2.41183	3.26452	4.8475
MSTRG.10575.1	2.157	1.75733	1.6948	9.87026	9.31486	11.3312	6.31199	3.18187	6.35767	3.81137	9.21821	2.66891	2.76989	3.73621	5.22102	3.79231	4.03008	3.59369	3.22079	4.99956	3.56136	3.80294	6.32815	7.08754	16.4955	15.0049	14.3251	19.6929	14.485	16.2916	2.29927	2.63069	3.07177	10.9352	11.2536	8.28122	8.87583	8.13002	11.8159	7.63552	7.54259	10.3689
MSTRG.10581.1	5.07237	9.46683	3.25959	27.7843	35.4156	0	23.7543	17.0677	23.9088	3.07475	0.91461	0.007799	0.100711	0.050201	6.04811	0.014985	0.06863	0.021935	0.008505	0.077152	0.058338	0.051954	3.43846	0.428252	0.137355	0.207561	2.89477	2.88511	0.211757	3.05082	0	0.05232	1.83133	0.559724	0.306599	0.66867	14.4407	22.3843	9.61516	0.688197	0.160171	2.12104
MSTRG.10583.1	0	0	0	0	0	0	0	0	0	0	0	0	0	0	0	0	0	0	0	0	0	1.08136	0	0	0	0	0	0	5.72803	0	0	0	0.189255	2.61597	5.65499	0	0	0	0	3.96258	2.7326	8.81729
MSTRG.10585.1	0	0	0	0	0	0	0	0	0	0	0	5.45337	0	0	4.7628	9.41905	0	0	4.84089	0	1.82911	7.79146	8.06537	0	0	0	3.00431	0	6.06366	6.04537	0	0	2.15302	0	0	0.064703	9.3304	0	10.2365	6.71948	4.91596	0
MSTRG.10585.3	5.54533	6.4866	0.42039	2.61092	0	2.99798	8.17844	0	0	0.377569	1.45812	1.05376	0.802923	1.21136	1.86195	0.982606	0.888379	1.18181	1.41865	1.06723	1.1691	2.01521	1.74275	1.30064	1.50381	0.941672	2.58698	2.20869	3.19377	1.72429	0.66179	0.564738	0.692478	0.704427	1.17051	7.13419	1.60581	0.612482	1.59568	0.833074	0.885449	1.39158
MSTRG.10585.4	0	0	0	0	3.35343	0	0	0	0	0.175493	0.155182	0.13828	0	0	0.341251	0.186646	0.156644	0.027759	0.082089	0.040018	0.067054	0	0.06581	0	0.121138	0.286411	0.452911	0	0.103856	0.349401	0.043605	0.007013	0	0.279493	0.004217	0.491706	0.141436	0.037385	0	0.342093	0.182299	0.160142
MSTRG.10588.1	3.64255	6.91002	4.22509	32.5148	30.8357	35.0131	16.0736	11.1685	15.838	0.018247	2.47184	0.412956	0.024012	0.00727	0.056359	0.020753	0.009567	0.550442	0.026015	0.008052	0.01106	0.009918	0.033382	1.92911	12.1169	3.91357	0.896158	4.35886	3.00711	2.98473	1.52724	2.85795	4.53069	4.6623	3.78938	3.80331	1.51263	1.52476	1.60635	0.536257	0.365442	0.654367
MSTRG.1059.2	0	0	0	0	0	0	0	0	0	0.045438	0.18522	0.020679	0.033818	0.018493	0.009412	0.031448	0.146012	0.019209	0.010596	0.043045	0	1.00126	0.158098	0.305304	0.50548	0.319284	0.357591	0.815105	0.209728	0.144397	0.07143	0.108148	1.60662	6.89998	0.161492	0.146147	0.088332	3.62684	0.16382	0.024265	0.031548	0
MSTRG.1059.3	0	0	0	0	0	0	0	0	0	0.06261	0.345291	0.275176	0.316818	0.392819	0.713248	0.354799	0.353999	0.299293	0.03445	0.171388	0	2.16851	0.029102	0.100149	0.279917	0.257288	0.324543	0.397297	4.2056	0.140372	0	0.019312	0	0	0.000466	0	0	0	0	0	0	0
MSTRG.10591.1	4.19875	2.83758	4.51197	5.55566	2.91139	4.09215	10.4254	13.5193	10.9776	0	0.14997	0.064961	0.067727	0.021203	0.06044	0	0.060655	0	0	0.096146	0	0.045516	0	0	0	0	0.072285	0	0	0	0	0	0	0	0	0.028713	0.873726	0.627678	5.10206	0	0.112368	0
MSTRG.10592.2	0	0	0	0	0	0	0	0	0	0	0	0	0	0.018338	0	0	0	0	0	0	0	0	0.130071	0.030701	0	0	0.051569	0	0	0.261928	0	0	0	4.52447	0.042967	4.91562	0	0	0	0	0	0
MSTRG.10593.1	0	0	0	0	0	0	0	0	0	0	0	0	0	0	0	0	0	0	0	0	0	0	0	0	0	0	0	0	0	0	0	0	0	0.096941	0	0	0.063274	0	0	0	0	0
MSTRG.10596.1	3.20765	2.51476	1.88281	25.2914	25.0189	20.0625	11.6608	5.52279	6.70271	1.3862	3.49731	1.48324	1.86724	1.28598	2.40831	1.81901	2.25679	1.32766	1.42663	2.52489	1.59829	1.096	2.64795	2.42589	8.19007	7.44144	7.06322	9.1287	4.57434	4.88884	0.764782	1.30796	1.78138	7.8265	8.04236	6.52364	2.02346	2.11157	3.54907	1.66967	2.44425	4.64221
MSTRG.10599.1	0.947389	1.28473	0.925938	4.27303	3.57743	4.05976	3.8003	2.10071	1.85628	1.77319	3.45131	1.37019	1.26355	1.08746	1.98635	1.84189	1.45117	1.21832	1.44541	1.73218	1.81365	2.47414	2.41183	2.80023	4.0348	4.7441	5.00031	3.76996	4.03428	4.20269	1.37387	2.46589	1.57636	5.61529	3.96254	3.08385	0.923901	1.58638	1.34251	3.86541	2.85374	4.54734
MSTRG.106.1	0.641264	0.353049	0.179058	0.220623	8.07381	8.39285	1.93661	1.58107	2.18865	0.141177	0.142243	0.058065	0.084506	0.07804	0.060668	0.051305	0.527355	0.196269	0.064183	0.111371	0.18377	0.111733	0.119344	0.073837	1.12024	1.14312	0.44866	0.775091	1.77098	0.450793	0.525121	1.08333	0.794177	6.8673	5.64125	5.51618	0.7578	0.757406	1.39563	4.56559	2.21617	4.71484
MSTRG.1060.1	1.04031	0	0	0	7.94222	7.31004	0.891567	0	0	2.36501	6.14889	0	0.932188	0	0.487832	0.269366	0	0.818876	1.14769	3.45685	0	0	3.01106	3.4043	14.7039	12.5111	7.57084	10.8883	2.87928	9.89149	0.734679	0.620158	1.18337	3.57376	3.03994	4.98899	1.38587	1.79127	1.5867	2.62358	2.17361	4.02384
MSTRG.10600.6	0	0.200221	0	0	0.860765	0	0	1.05286	0	3.11929	5.28771	2.47906	2.48901	2.01438	4.0331	2.19089	3.01139	2.05745	2.1388	4.15254	1.78031	3.06989	2.80965	4.01167	12.2732	17.8768	9.42071	8.64027	9.75288	9.33487	1.72274	1.82775	2.30924	8.26659	8.34289	6.86101	6.57518	6.57866	11.0145	4.59775	3.94007	4.86549
MSTRG.10603.1	0	0	0	0	0	0	0	0	0	0	0.775953	0	0.541809	0.662905	0.977068	0.436815	0	0.360008	0.205406	0	0.740619	0.962935	1.70519	0	0	4.95702	0	5.48379	7.3216	4.17514	0.638358	2.03728	0	1.53994	4.88056	0	0.548694	0	5.70502	0	0	1.58493
MSTRG.10603.2	0	0	0	0	0	0	0	0	0	1.20724	0	0	0	0	0	0	0.792184	0	0	0	0	0	0	4.33006	4.22993	0	0	0	0	0	0	0	2.6154	0	0	0	0	0	0	1.28152	0.711582	0
MSTRG.10607.1	2.32383	3.5896	0.730751	7.23488	9.51279	9.61242	6.27415	3.08816	2.53566	0.762699	1.34668	0.548842	0.596588	1.17348	1.05357	0.655712	0.935485	0.748	1.03272	1.57537	0.945638	1.03566	1.40935	1.38824	6.03109	3.05525	1.93289	3.32315	1.53776	3.38058	1.06859	3.60955	3.40138	7.36475	4.96586	4.42988	9.36488	3.45421	12.9561	2.58974	2.07102	2.16453
MSTRG.10614.1	11.4996	10.2062	9.09376	77.584	11.4331	69.7606	44.0469	26.5374	25.4701	2.80707	5.11527	4.36291	4.71922	2.54581	4.46462	4.71518	2.98567	0.914749	1.93663	3.88912	4.80348	3.06409	5.74	4.50477	15.725	21.6423	15.4566	15.3497	10.5296	16.5182	2.9635	4.09749	3.89317	10.8785	9.53258	6.92929	7.01651	7.7861	11.8224	4.76196	3.4818	8.77187
MSTRG.10616.4	0	0	0	0	0	0	0.098242	0.236702	0	0.386347	0.514043	0.277475	0.499644	0.1602	0.676232	0.46358	0.556868	0.24836	0.305012	0.557604	0.578137	0.291951	1.11515	0.443772	1.11866	1.30666	0.98352	1.02754	2.96451	1.33681	0.296612	0.878553	0.464561	1.75849	1.29471	2.48741	3.03137	1.80958	1.27892	0.720387	0.74204	0.882816
MSTRG.10616.5	0	0	0	0	0	0	0	0	0	0.322656	0.208505	0.509943	0.148128	0.151557	0.629055	0.147539	0.356462	0.666799	0.107966	0.223879	0.265511	0.129292	0.199196	0.110788	0.275999	0.422769	0.544144	0.194344	0.355586	0.958027	0.537182	1.01127	0.625533	1.55794	1.29921	1.68959	0.792906	2.53079	2.42114	0.062936	0.38044	0.69374
MSTRG.10616.6	0	0	0	0	0	0	0	0	0	0	0	0	0	0	0	0	0	0	0	0	0	0	0	0	0	0	0	0	0	0	0	0	0	0	0	0	0.723942	0	0	0	0	0
MSTRG.10616.7	0.105272	0	0.000209	0.064079	0	0.000135	0.122708	0.672242	0.069995	0.739266	0.827692	0.967814	1.86378	0.742856	0	1.5534	1.53805	0.792437	0.462594	2.75455	0.466237	0.716118	1.33882	3.49336	7.86156	7.16661	2.81849	1.30649	1.09154	1.73206	0.334577	0	0.51943	2.93457	4.56498	0	1.86481	2.12903	1.88476	1.52744	1.02641	0.747267
MSTRG.10616.8	0	0	0	0	0	0	0	0	0	0.786048	0.379489	0	0	0	0	0	0	0	0	0.052027	0.300745	0	0.453896	0	0.093331	0.018384	2.04174	0.802785	1.28502	0.35472	0	0.048428	0.48748	1.73776	0	0.913249	0.260102	3.04516	1.94447	0	0	0.532622
MSTRG.10618.1	8.02946	13.4675	6.30786	0	38.3702	42.0171	24.1348	15.5229	16.5277	3.75575	5.96368	0	0.510137	3.21826	0.860102	2.44945	0	1.23804	0.643701	1.05254	0.672265	1.85365	1.75833	0	3.53412	0.05007	9.12338	0	3.45412	2.70287	1.12306	0	1.04883	0	5.64635	8.50353	3.42664	4.01933	0	0.567811	0.442093	0.417687
MSTRG.10618.4	0.771626	1.25057	0.620054	4.432	5.48985	6.68802	2.89795	1.89123	2.82223	0.942664	1.85032	0.851145	0.681063	0.81285	1.38674	0.546416	0.971137	0.662865	0.694025	0.962944	0.727952	1.08676	1.16809	1.53081	4.44192	3.42868	2.62059	3.18964	2.58668	3.48521	0.568792	0.663755	0.867312	3.08959	3.80978	5.1772	1.65267	1.82194	3.21153	1.40694	1.22164	2.00343
MSTRG.10618.5	3.39563	7.98276	3.42969	0.132314	23.9407	25.8003	15.351	11.2831	10.6372	0.045399	0.029289	0.026769	0.033715	0	0	0.013208	0.053216	0.024303	0.019206	0.021752	0.02184	0.034839	0.04699	0.09518	0.035532	0.113236	0.018227	0.052239	0.011414	0.040984	0.039628	2.1615	0.054965	0	0	0	0.075526	0	0.085103	0.065182	0.034447	0.022206
MSTRG.10619.1	0	0	0	0	0	0	0	0	0	0	0	0	0	0	0	0	0	0	0	0	0	0	0	0	0	0.820678	0	0	0	0	0.260431	0	1.9008	0	0.956941	0	8.37848	0	0	0	0	0
MSTRG.1062.1	0.289025	0.501373	0.262946	2.31524	1.95553	2.17703	1.79259	1.39683	1.34199	1.76662	2.13926	0.521422	0.752345	1.19141	1.48067	0.922247	0.603517	0.421988	0.506766	0.87499	0.518871	0.644408	0.602593	0.768088	4.6153	4.16842	3.49191	2.72206	2.96079	3.12552	0.546439	0.922513	0.666717	2.87514	2.62206	2.43696	1.22298	0.211207	1.67087	3.01048	2.48759	4.74834
MSTRG.1062.2	0	0	0	0	0	0	0	0	0	0.012248	0.953475	0	0	0	0	0	0.027071	0.014756	0	0	0	0	0	0.010965	0.038355	0	0	0	0	0	0	0	0	0	1.93991	0	0	8.1735	6.16661	1.49078	0.981915	3.95466
MSTRG.1062.3	0	0	0	0	0	0	0	0	0	0.06696	0.387238	0.703414	0.004622	0.028002	0	0.01862	0.010038	0.005149	0.00757	0.008292	0.013787	0.006889	0.0126	0.025303	0.272791	0.321422	0	0	0.086389	0.157514	0.558056	0	0.20512	8.82103	5.42089	5.55887	5.6821	2.30269	2.24811	1.27317	1.37854	1.80888
MSTRG.1062.6	0	0	0	0.753742	1.06398	0	0.120866	0	0.284668	0.169679	0.083393	0	0.108133	0.122067	0.307813	0.108353	0.170274	0.098691	0.119031	0.095508	0.111533	0.131776	0.161691	0.134285	0.696384	0	0	0.308099	0.671485	0.011719	0	0.000978	0	0.059011	1.11068	0.149028	0.129561	0.011336	0.086628	0.402032	0.010897	0.026217
MSTRG.10620.1	0	4.63907	0.142635	0.302294	11.8319	0	7.32704	0.423844	0.603512	3.53069	6.25961	2.41802	3.4338	2.49253	3.70016	3.12374	4.00413	3.87901	2.89867	5.47512	2.67885	3.79684	6.3322	5.46164	14.426	13.3023	14.2294	14.2225	15.3739	13.9026	1.47645	0.093312	1.62527	6.92104	7.6269	9.13613	7.24894	6.04117	7.13706	2.20142	1.80332	2.93717
MSTRG.10627.1	0	0	0	0	0.87027	0	0	0	0	4.57108	4.55588	0	1.83644	0.073649	0	0	2.68002	1.9685	0.08665	3.32247	0	0	2.64894	0	8.3882	0.81509	0.126198	0.437822	0	0	0	2.71559	4.58251	7.51362	1.36486	5.12631	0	3.40499	7.56734	3.05783	2.79049	0
MSTRG.10627.3	0	0	0	0	0	0	0	0	0	0	0	0	0	0	0	0	0	0	0	0	0	0	0	0.353534	0	0	0	0	0	0.312639	12.6933	0.470904	3.72649	0	0.330501	0.001601	4.79412	4.15927	0	0.152109	0	0
MSTRG.10627.4	0	0	0	0	0	0	0	0	0	0.318386	0.182607	0.82222	0	0.020612	0.087712	0.097537	0.163918	0.070969	0.087221	0.124113	0.632075	0.121115	0.118835	0.113755	0.612655	0.648849	0.229599	0.412035	0.459175	0.15827	0.614768	0	11.0581	0.171935	0.210916	0.099663	0.145918	0.117071	0.102114	14.6288	1.95454	0.851696
MSTRG.10627.5	0	0	0	0	0.323122	0	0	0	0	4.14424	5.18205	2.2026	1.88091	4.85512	2.51775	5.47564	5.21383	2.12274	1.93855	4.43563	1.84433	2.34563	2.76884	2.36122	7.14165	6.86604	5.48359	6.64663	5.92546	6.58688	3.10013	0.072063	5.97927	0.575325	0.396293	0.29383	0.212139	0.24011	0.18949	10.212	10.5347	2.7046
MSTRG.10627.6	0	0	0	0	0	0	0	0	0	0	0	0.051495	0	0	0.067703	0.014975	0	0	0	0	0.043144	0	0.015495	0	0.186397	0	0	0	0	0	21.1312	0.002134	5.65093	0.09826	0.022966	0.091209	0.019617	0.023048	0.014869	0	0.088894	0
MSTRG.10627.7	0	0	0	0	0	0	0	0	0	0	0	0	0	2.5682	0	0	0	0	1.91763	0	1.74361	1.94616	0	4.11911	0	8.59273	6.40893	6.71016	0	6.94941	0	12.6285	0	0	4.95795	0	0	0	0.049786	0	0	0
MSTRG.10628.1	2.46598	4.12196	3.76582	29.8123	12.0208	7.1042	19.6838	3.16158	6.95657	3.39502	12.6136	3.69183	3.67119	3.76746	4.9306	3.52867	5.91079	3.65585	2.63373	6.18393	2.85232	3.74658	8.74502	5.42498	24.2129	20.635	14.8947	22.095	20.9492	22.7995	0.567766	0.724572	1.44796	7.73108	4.65754	3.387	5.42109	4.49031	4.00945	2.5588	1.73712	3.56682
MSTRG.10634.1	1.24382	0.150956	0	0	0	0	0	0	0	0.012588	1.51391	0.027254	0.049862	0	0.038375	0.138179	0.032273	0.024141	0.020209	0	0.051368	0	0.033652	0.080619	0	5.01794	0.042295	0.045778	0.081445	1.18227	0.004245	0.061024	0.84867	0.023639	0.158162	0.194217	0.605148	0.148525	4.84296	0.15602	0.126915	0.313595
MSTRG.10634.2	0	0	0.354684	0.191552	12.5219	8.02564	0.292352	2.2701	0.451511	0.022917	0	0.063442	0.029481	0.056026	0.015539	0.069271	0.032919	0.018941	0.04476	0.027573	0.038238	0.024127	0.018527	0.044791	0.15857	0.095391	0.094026	0.072492	0.10573	0.020733	0.09686	0.106937	0	0.407602	2.14794	0.537382	0.041805	0.176285	0.106521	0.192583	0.188148	0.425841
MSTRG.10634.3	4.30799	4.25927	2.88552	26.488	13.9365	17.7073	14.6107	6.68362	9.10932	5.56752	11.8897	3.81584	4.83011	4.5644	6.38252	4.02763	7.41227	4.19063	4.46736	7.8851	5.44305	5.94674	9.75286	12.8198	30.921	26.1909	27.0968	26.6698	25.9853	29.2523	2.18886	1.98306	2.14417	12.3016	9.29344	9.75106	6.20476	6.81105	7.53132	7.72431	6.56697	11.876
MSTRG.10634.5	0	0.752524	0	2.3575	3.75935	0.948921	0	0	0	0.690634	1.39559	0.634744	0.270701	0.513314	0.407017	0.604505	0.157374	0.20887	0.224862	0.588338	0.374309	0.415295	0.178088	0.765096	1.91718	2.05369	1.95736	1.91371	1.84731	1.65066	0.645392	0.801457	1.0126	9.7396	8.01109	4.45078	2.42011	4.1733	3.5518	1.23045	1.707	2.88288
MSTRG.10634.6	1.84796	2.72243	1.27436	11.1803	15.2235	13.493	7.92416	4.50012	6.11383	5.7515	10.0327	4.11905	3.87415	4.39851	5.44041	4.14738	5.10876	3.13867	3.49768	6.17343	3.1812	3.73669	6.07189	7.83842	28.6031	28.03	20.9641	20.4359	18.3269	24.4941	1.95311	2.18245	2.31164	17.3092	14.4688	12.7568	10.2134	10.2379	15.5805	6.97304	5.41267	12.5818
MSTRG.10635.1	0	0	0	0	0	0	0	0	0	0	0	0	0	0	0	0	0	0	0	0	0	0	0	0	0	0	0	0	0	0	0	2.09944	0	9.60166	0	0	0	11.2504	11.3446	0	0	0
MSTRG.10635.2	0	0	0	0	0	0	0	0	0	0	0	0	0	0	0	0	0	0	0	0	0	0	0	0	0	0	0	0	0	0	0	0.038885	0	6.55295	0	0	0	4.27447	3.41584	0	0	0
MSTRG.10637.2	0	1.4363	2.29701	7.18507	7.64032	1.34061	3.38688	0	0	2.88727	3.35774	2.44112	2.0571	1.25515	2.39677	2.04036	2.91831	2.13905	2.57999	3.13861	1.45369	2.34987	4.46981	2.3999	12.4966	8.9204	7.95064	6.72298	8.332	7.73165	2.76068	1.83033	3.34023	5.47229	3.83094	4.20975	2.97343	3.96071	4.63992	2.65085	1.89395	2.84219
MSTRG.10638.6	0	0	0	0	0	0	0	0	0	0.379746	0.639495	0.323721	0	0.12597	0.113886	0.312224	0.448851	0.311839	0.351478	0.477466	0	0	0.584113	0.954373	1.38208	1.30681	1.38387	0.706949	2.1072	0.473228	0	0.166004	0.4856	1.59111	0.664629	0.270676	1.11424	1.04907	0.765501	0.654383	0.134404	0.2273
MSTRG.10639.1	34.503	58.4281	43.1106	0.851223	1.72729	183.623	1.03087	52.128	0.549894	6.77945	23.1339	2.49538	8.02721	10.5379	4.57407	1.71825	21.9293	0.61784	8.17333	7.57196	13.0446	6.84408	5.73078	9.30985	49.7037	19.5666	13.5074	21.7389	19.5549	26.6725	4.127	4.42481	7.43508	10.0701	9.1696	7.87263	18.8681	12.3959	9.64607	6.70363	5.29644	8.11319
MSTRG.1064.1	0	0	0	0	0	0	0	0	0	0	0.373376	0.838348	0	0.693958	0.385582	0.83577	0	0	0.031766	0	0.504403	0	0.030281	0.550303	1.41724	3.78761	3.68437	0.443173	1.09034	3.17088	0.182342	0.331828	0.218287	4.75748	1.44719	2.05956	3.32414	2.04151	2.2779	1.18899	0.717292	0.590295
MSTRG.1064.2	0	0	0	0	0	0	0	0	0	0	0.026504	0.007741	0	0	0.00468	0	0	0	0	0.090827	0	0	0	0	0.029794	0	0	0.01789	0	0.063258	0	0.001944	0.014322	0.270307	2.44382	0.109603	0.026838	0.076741	0.032285	0	0.072534	0
MSTRG.1064.3	0.234655	0.547981	0.25738	3.20158	3.5037	2.42582	2.61547	0.837722	2.31929	0.046707	0.583875	0.001296	0.162227	0.002842	0.372603	0.229037	0.108144	0.014837	0.017505	0.15619	0.236638	0.113288	0.604363	1.24019	1.81558	3.99081	0	0.873894	1.28972	2.06337	0.280422	0.149215	0.546153	0.530467	0.669367	0.761648	0.236235	0.351467	0.706336	1.41073	1.22396	1.72354
MSTRG.1064.7	0	0	0	0	0	0	0	0	0	0.920291	1.33651	0	0	0.368282	0	0	0.003613	0	0.15619	1.89725	0.033189	0	0	0	1.81054	1.18842	0.695633	1.45307	0.818584	0.960768	0.437991	0.629126	0.029567	2.55272	3.44733	1.88012	0.873334	4.66734	3.24896	0.751438	0.376413	4.21382
MSTRG.10642.1	0.504622	0.634567	0.788946	3.92347	5.80457	5.96233	3.87094	1.03756	3.29148	1.19125	2.3708	1.22611	0.635551	1.00938	1.09418	0.768412	1.07097	0.872203	0.802734	1.71623	0.567807	0.821541	1.94127	2.18456	5.19091	4.30316	4.17217	3.911	4.931	3.22913	1.33306	0.937468	1.78333	5.26048	2.73529	5.0591	1.30215	1.10379	2.94669	1.05819	0.913329	1.37883
MSTRG.10645.3	0	0	1.30394	0	0	0	0.660024	0	0	0.051519	3.62159	0.049661	1.19879	0.035813	0	0	0	0	0	0.049262	0	1.26527	0	0.094373	5.22713	0.381892	0.374309	0.331437	4.1179	0.285839	1.09967	0.022874	0	0.399749	7.22559	5.55458	9.63421	0.215889	7.1207	0.360092	0.456001	0.602949
MSTRG.10645.4	0	0	0	0	0	0	0	0	0	0	3.18797	0	2.98821	0.406431	0	0.790818	0.046319	0.920318	0	0	0.685512	1.94598	0.574641	0.56451	0	0.203065	3.28245	1.95473	4.05856	0.3139	0	0.044443	0.048407	0	0	0.198979	2.13007	0.975228	0.43145	0	0.150006	0
MSTRG.10645.5	0	0	0	0	0	0	0	0	0	0.017911	1.68684	0	0	0	0	0	0	0	0	0	0	0	0	0.85657	6.38849	0	0.009158	2.0204	0	0	0	0	0.006717	0	0	0.054173	0.202	0.038948	0	0.095454	0	0
MSTRG.10647.2	0	0	0	0	0	0	0	0	0	0	0	0	0	0	0	0	0	0	0	0	0	0	0	0	0	0	0	0	0	0	0	1.16903	0.355674	8.29153	0.393505	0.742349	0	0	3.19024	0	0.003675	0
MSTRG.10647.4	0	0	0.187164	0	0	0	0	0	5.56812	0	0	0	0.076242	0	0	0.000265	0	0	0.022424	0	0	0	0	0	0	15.2112	0	18.2066	0	0	1.64406	0	0.511069	9.63972	0.039778	0.066206	3.24662	0.000718	0	0	1.36907	5.38788
MSTRG.10647.5	2.80199	4.30348	1.83807	0	21.6102	0	0	9.55116	5.5513	5.99651	8.79062	2.27586	4.13545	2.80589	3.31923	4.44095	5.81713	3.53386	1.11266	6.20465	0	2.68743	8.24255	7.28191	16.1381	2.0378	20.1379	10.7137	22.857	14.5894	1.30695	0	1.96566	4.27483	12.2876	12.9805	0.842	6.38805	3.99147	0	1.21905	4.51334
MSTRG.10649.1	0.773193	0	0.231953	4.87104	4.68342	3.0365	2.67204	1.68529	1.71462	0.578673	0.737043	0.273246	0.852479	0.408958	0.574196	0.580323	1.08768	0.958304	0.493771	1.09739	0.437773	0.913241	0.98806	0.587198	3.35215	2.74767	1.70586	4.54011	1.91962	2.69263	0.15233	0.215258	0.20504	2.00317	1.40037	2.22276	1.09593	1.01679	1.33946	0	0	1.08174
MSTRG.10650.1	0	0	0	0	0	0	0	2.74872	0	1.19739	2.68722	0.589392	1.28098	0.697675	1.2974	0.351608	3.09891	0.915154	1.10796	3.74336	0.466308	1.42254	3.14183	2.03519	7.88922	6.93999	2.01417	10.1201	4.81672	4.11313	1.07019	0.820658	1.25017	10.7823	7.19808	20.8153	1.77901	1.3982	1.50832	0.741448	0.912144	0.752179
MSTRG.10654.1	14.4354	20.4761	10.979	55.6855	43.1831	52.8658	25.8425	23.0296	23.7203	2.57943	5.53036	2.96798	2.00504	2.89422	3.59355	3.35423	3.18518	3.68954	3.24598	2.87606	3.57466	5.48701	3.45102	2.8771	6.96563	4.27258	4.31651	4.43125	3.92555	4.65882	1.69892	2.64695	2.1786	2.93276	3.3308	3.12468	4.552	0.549246	4.77035	3.51412	3.43188	3.18316
MSTRG.10656.1	6.32901	8.44985	4.05124	29.799	24.4908	24.2718	17.2673	12.6162	13.2895	0.209936	0.209044	0.189492	0	0.095554	0	0	0	0.077406	0	0.173154	0.061531	0.154001	0.030436	0.242061	0.541114	0.035971	0	0.448695	0.418406	0.377748	0	0	0.060328	0.296148	0.288973	0	0.310993	2.36104	0.240144	0.097419	0.052979	0.0757
MSTRG.10661.1	0.949099	0.973621	0.443851	5.18041	4.55505	5.45377	2.83188	1.66758	1.93457	2.19093	4.03976	1.68154	1.76394	1.63261	2.01941	2.00907	1.58057	1.14503	1.13257	1.90454	1.21129	1.36163	1.77442	2.02523	9.68576	7.60494	7.50293	8.12335	9.15774	7.88853	0.563412	1.23679	1.27736	4.71885	5.79936	7.43515	2.62021	3.67969	4.29472	3.46481	3.27855	4.88129
MSTRG.10665.1	0.433637	0.529766	0.552086	0.663264	2.17702	3.30986	1.91727	1.27161	1.59936	1.25873	3.15566	1.09274	0.860835	1.14377	1.74717	1.0002	0.744162	1.00298	1.02295	1.53573	1.00478	0.980824	1.06692	2.20993	6.10161	5.01262	5.1458	3.9065	6.04897	5.07063	0.344817	0.738552	0.745438	2.5328	2.66779	1.59762	2.73663	3.75627	4.37641	2.32051	1.88417	2.35989
MSTRG.10667.2	0	0	0	0	0	0	0	0	0	4.33831	10.4906	0	0	0.001872	5.71078	3.9117	4.53178	4.11355	0	2.79144	0	3.52556	9.22163	4.31535	20.1063	9.768	6.32433	0.102768	15.3767	0.05809	1.93744	2.18591	2.42261	6.70953	0.018324	40.8158	3.05114	7.81511	1.55663	0	2.92629	4.01487
MSTRG.10667.4	1.19917	2.21851	0.771697	21.282	19.0477	20.5283	7.09302	6.55078	10.5405	0.847752	5.44985	0.444169	1.017	0.375932	3.42072	2.15429	0.963079	1.08125	0.647111	1.54614	0.254433	0.889709	1.67539	0.63092	4.10309	7.129	1.34454	16.8856	2.96935	5.4589	0.203029	0.309316	0.313045	2.71491	3.94193	4.89029	0.338426	1.01066	1.58818	0.423755	0.524276	0.800871
MSTRG.10673.2	0	0	0	0	0	0	0	0	0	1.53284	5.60147	1.76181	2.18509	1.3152	0.606528	2.24643	0.792053	2.44505	4.02344	1.28438	0.507594	0.471752	4.60546	0.937281	2.4753	4.85197	4.8887	5.66753	6.52555	2.51629	4.8174	4.84734	2.10607	5.04569	17.2841	133.89	9.81799	6.06935	17.1571	1.23496	1.21693	1.10578
MSTRG.10674.2	62.4591	2.26419	1.01871	2.91866	0	0	29.6434	74.1143	53.8078	0.361658	0.250346	22.1295	15.8544	18.233	30.2409	28.0577	0.115063	0.024355	0.421886	16.3105	13.7463	26.1698	35.7383	0.135545	0.05439	0.095064	0.092615	0.085299	13.349	0.482998	7.4245	31.1914	9.81305	0	0.011827	0	0	0.020749	0.032167	1.25197	17.496	0.114432
MSTRG.10674.3	0	0	0	0	0	0	0	0	11.9199	59.9856	39.4963	48.8583	35.7985	53.8062	64.759	45.1245	42.3356	50.1106	56.8334	35.6731	39.9046	52.1185	55.0666	61.9326	1.91632	0	41.3189	0	21.214	0	15.8082	7.49323	10.5452	0	0	0	0.504989	1.66027	3.54433	42.9909	25.5888	3.26026
MSTRG.10674.4	0	27.2603	0	3.4244	3.68289	4.77488	0	0	0	1.69986	0.9138	1.60123	1.30491	1.59261	2.96239	1.51186	1.34054	0.987046	2.87609	1.50204	1.42036	1.96198	2.98601	2.57748	0.042244	0.042116	0.978628	0.028776	0.249834	0.214649	13.2501	10.7504	14.2683	0	0.046038	0.010791	0.47035	0.275618	1.44345	18.8778	21.689	2.33207
MSTRG.10678.1	0	0	0	0	0	0	0	0	1.84217	1.44773	0.773696	0.884873	0.566714	1.24722	1.13815	0.8002	1.23016	0.992944	0.747907	0.195004	0.245518	1.48353	0.663566	0.624353	1.27062	3.22446	1.6963	3.52869	1.2312	3.83546	5.6e-05	0.725554	0.213522	1.00906	5.69864	2.13496	1.77596	0.550013	0.616123	0.723124	0.825055	0.503031
MSTRG.10678.2	1.25077	1.73334	3.02493	9.05204	0	1.39674	5.10134	2.41695	4.62315	1.55703	4.73814	0.970199	2.4894	1.00113	1.27706	0.864967	1.43096	0.921403	0.964851	3.0736	1.70365	1.28455	3.39028	3.12332	11.1028	6.11355	8.04227	7.07643	9.07989	3.58177	0.929207	0.279066	1.11698	3.81386	0.626614	3.87327	2.33445	5.38574	5.08011	0.676362	1.32496	1.55057
MSTRG.10678.4	0	1.35914	0	0	13.3905	10.2364	0.832282	0	0	0	0	0.662461	0	0	1.252	0.45799	0.865704	0	0.38875	1.20048	0	0	0	0	0	0	1.71502	2.21961	0.839215	4.05579	0	0	0.41706	3.76465	0	1.45907	0	2.8435	3.14375	1.26666	0	1.85329
MSTRG.10680.2	0	0	0	0	0	0	0	0	0	0.499243	0	0	0	0	0	0	0	0	0	0	0	0	0	0	0	0.37711	8.07401	0	2.13045	0	0	0	0	11.6316	0	2.27758	0	0	8.83514	0	0	0
MSTRG.10682.4	0	0.073852	0	0.709547	0.457833	0.597593	0.368876	0	0.404091	0.701883	1.82496	0.62815	0.756952	0.466027	1.36538	0.380087	0.796622	0.426388	0.589602	0.985918	0.5779	0.763504	1.1199	1.15234	2.7333	3.10023	1.5656	2.23304	2.65259	2.76221	0.273585	0.391551	0.439551	3.32792	3.50695	1.83083	0.703388	1.31202	1.05998	1.73529	1.70631	2.19039
MSTRG.1069.1	0	0	0	0	0	0	0	0	0	0.015778	0.210582	0.016236	0.07012	0.00803	0.013321	0.044393	0.041602	0.007361	0.029911	0.011858	0.013251	0.010559	0.015209	0.076999	2.15928	0.114954	0.051538	0.023211	0.558415	0.10091	0.041151	0.184994	1.80545	4.76714	38.7284	5.83812	2.30899	3.45428	9.3524	0.117384	0.041605	0.1192
MSTRG.1069.2	2.52365	2.81954	0	20.5341	17.6095	17.0272	7.26626	5.76828	6.29785	0.244314	1.47201	0.07831	0.380481	0.191784	0	0.162298	0.121756	0.153844	0.131201	0.077566	0.549766	0.380312	0.080396	0.179102	2.53856	0.4942	0.579191	0.98938	3.7548	0.641324	0.598454	2.12001	4.16675	8.8823	5.9889	10.8966	7.56832	9.13079	15.0371	3.6569	2.90183	5.2188
MSTRG.10690.1	0	0	0	0	0	0	0	0	0	0.052565	0	0	0	0	0	0	0.09153	0.161686	0	0	0	0	0	0	0	0.372844	0	0	0	0	6.99335	0	24.8936	12.0171	0.633067	7.82872	12.2497	26.6882	0.494091	0.566495	0.319307	0.250892
MSTRG.10696.1	2.63926	3.15779	1.95488	0.907737	16.2262	13.1111	11.1478	6.11894	8.52293	1.7489	2.99143	1.31073	1.63207	1.89804	4.31643	1.41241	1.58308	1.81804	1.62763	2.50516	1.6337	1.75442	2.30652	4.171	13.8643	7.38883	5.50751	9.3438	7.93308	6.06104	2.20305	3.4119	3.79099	5.694	8.77345	10.9662	2.65904	3.02534	26.7731	2.88674	2.32288	4.48993
MSTRG.10698.1	2.5634	2.86459	6.41896	7.60131	4.12955	3.80984	7.15593	4.41375	3.35678	6.65499	1.16837	2.44272	5.1287	4.27684	1.43884	2.93169	2.8495	0.717464	0.770771	1.24179	1.67025	0.88065	2.5348	1.45453	3.16048	2.07573	1.53357	1.65583	1.6614	2.73021	2.18005	0.826945	2.09589	0.811832	0.714121	0.563039	0.508791	0.658947	0.863975	1.30054	3.0727	1.5487
MSTRG.10698.2	0	0.035994	0	0	0	0	0.364604	0	0	1.768	0	0.269783	1.1548	4.83674	0	1.88635	0.560238	0	0.03608	0	0.11399	0	0.187658	0	0	0.00019	0	0	0	0.000186	0	0	1.02804	0	0	0	0	0	0	0.230856	0.429074	0
MSTRG.10698.3	0	0	0	0	0	0	0	0	0	0	0	0	0	0	0	0	0	0	0	0	0	2.19024	0	0	0	2e-06	0	0	1e-06	0	0	2.22697	0	0	0	0	0	0	0	0	0	0
MSTRG.10698.4	0	0	0	0	0.964787	0	0	0	0	1.54106	18.4185	1.09887	0.782252	0.808963	6.59403	4.05627	3.72025	10.9388	6.93207	7.66989	8.40174	0	9.55368	8.55646	0.512189	0.062622	0	2.98378	0.452486	0.247447	0.43109	3.8532	0	0	0.052613	0	0.089745	1.00241	0.054489	1.29006	2.94806	0
MSTRG.10698.5	3.91118	4.96346	3.42772	2.89778	2.65937	3.62645	1.19651	5.69603	4.10933	11.7605	9.27259	15.3201	9.38585	9.77383	11.6014	8.31111	17.926	6.87657	8.31304	10.9826	11.6178	11.7862	11.6471	14.6118	4.64161	4.58912	4.03779	2.94889	3.74492	4.71766	2.69945	3.28255	5.44127	2.27564	1.41065	0.939425	1.26209	1.20043	1.67658	11.0271	17.9314	11.735
MSTRG.10699.1	8.84088	2.40413	7.68166	1.77423	1.44696	1.59415	1.75384	2.96015	3.98332	2.79052	1.58822	1.10915	1.98059	5.44949	1.29479	1.67279	2.8661	1.78481	0.765071	1.27451	3.69729	1.18453	3.6064	3.32321	1.49199	1.03663	0.904141	1.13205	0.995745	1.2512	2.22862	1.4848	1.87332	0.848913	0.650403	0.76932	0.689897	0.636479	0.712179	2.80403	3.65105	1.55939
MSTRG.1070.3	0	0	13.2132	0	0.305064	0	0	0	0	1.45472	11.5513	0.645461	0.015884	1.45901	1.80485	0.940798	2.33887	0.089509	2.83232	1.96049	0.045131	1.63478	0.737545	1.63512	5.41454	5.30078	5.12164	3.57977	4.53491	21.1456	0.255118	4.45095	0.729632	1.09202	1.79583	2.5131	5.07927	4.86545	10.729	1.17586	1.17427	0.421568
MSTRG.10702.8	0	0	0	0	0	0	0	0	0	0.383209	1.55503	1.64164	2.91559	0.429837	5.03763	0.377089	0.89096	1.78914	1.18473	1.96006	0.755917	2.37645	0.757979	2.36316	7.03251	5.36359	3.40064	7.54066	6.97014	2.72821	0.221314	0.513022	0.217822	0.546032	0.915451	0.786103	0.379075	2.54866	1.0648	0.530511	1.24972	0.762498
MSTRG.10702.9	0	0	0	0	0	0	0	0	0	1.29181	3.83712	1.55603	2.34694	0.418544	3.82577	0.99893	1.08766	2.2715	1.51788	2.67519	0.751757	2.99084	2.17523	2.32522	9.24677	4.51996	3.26199	3.56279	7.59645	2.99851	0.541269	1.14627	0.827805	0.628442	0.716446	0.336142	0.327982	1.90777	1.20088	0.616769	0.741498	0.639314
MSTRG.10711.1	2.66231	5.91144	2.6926	19.2311	9.18611	20.1096	9.30732	5.74834	1.34541	0	0.542318	0.301608	0.117687	0	1.32286	0.043212	0.324534	0.330009	0.454518	0.530569	0.379621	0	0.974557	0	0	0	0.20139	2.98081	0	0.048956	0.325895	0.388725	0.839619	0.027858	0.194793	0.575618	4.87633	1.8478	3.17474	0.228158	0.131027	0.100194
MSTRG.10711.3	0	0	0	0	15.5055	0	0	0	11.3153	1.83916	3.07239	2.0669	3.3712	3.44799	1.25893	2.64959	4.40375	2.83558	2.22134	5.12474	2.64048	1.81831	6.19167	8.01968	24.0979	9.09817	15.8191	8.72249	9.08382	12.0628	1.94024	3.35805	2.71115	9.65404	14.6531	13.3786	3.54052	4.24818	2.73983	5.37348	4.57392	8.12964
MSTRG.10711.5	0	0	0	0	1.28769	0	0	0	0	1.273	3.82304	0.877522	0.657989	0.379493	1.82291	0.30687	0.60109	0.077493	0.80425	0.920182	0.72629	2.24315	3.17499	1.02292	2.74633	9.70754	1.97415	8.36847	11.2256	8.91264	0.330761	0.162092	0.24903	7.855	3.25227	4.1735	0.964224	1.95637	1.29349	1.00211	0.47502	1.52985
MSTRG.10712.1	1.30194	1.91761	2.94194	4.57987	4.94292	4.46265	4.24397	2.98288	3.70046	3.29885	5.51963	2.73593	3.16046	2.94592	4.18832	2.15087	4.17675	2.28145	2.58094	4.48146	2.67464	2.85117	4.42287	5.46193	10.737	10.6428	8.43711	7.27154	11.1921	9.76446	0.511547	2.05196	0.935514	2.35102	3.25354	2.21337	1.78979	3.21894	2.26356	2.13419	1.53713	2.16726
MSTRG.10715.1	4.88595	5.96886	6.94428	30.3752	31.6125	32.8587	21.8136	9.97771	7.75335	5.55162	12.3847	3.3909	6.02595	3.74463	6.04666	3.79739	7.78004	3.92148	4.52736	10.2735	3.8361	7.0432	13.7712	12.3577	37.0006	33.8926	20.8943	29.9144	32.1873	29.7783	1.51237	1.38711	2.08605	17.1387	13.3013	13.7187	8.10826	11.664	12.754	6.36281	4.48874	9.51858
MSTRG.10715.2	0	0	0	0	0	0	0	0	0	0.132997	0.200182	0.022434	0.071092	0	0.339818	0.169017	0.095567	0	0.112047	0.054914	0.036007	0.134601	0.361783	0.204496	2.37901	0.994545	0.858764	1.13071	1.73973	0.800247	0.988037	0.679512	0.667374	1.94308	1.42377	3.59293	0.759692	1.70428	1.77038	0.044857	0.06279	0.090402
MSTRG.10715.3	0	0	0	2.31263	1.85796	3.64192	0.653406	0.114203	0.88828	0.338178	8.15046	1.97329	0.629273	2.64602	1.05822	1.12489	2.96695	2.51371	1.93495	3.26923	1.3009	1.33077	3.99481	2.13244	6.54014	2.57326	9.24689	12.3258	6.45004	12.7451	0.092124	0.854922	0.891154	0.98966	4.78874	0.946779	1.11268	1.20377	0.658069	2.42854	1.35554	3.81174
MSTRG.10715.5	0	0	0	0	0	0	0	0	0	0.580153	0.213441	0.208077	0.031605	0.117092	0.132921	0.251732	0.20894	0.305735	0.262319	0.328267	0.22557	0.163584	0.14275	0.144135	2.74056	1.24526	0.134299	0.198307	0.337351	1.72316	0.101511	0.10258	0.042647	1.57224	0.660607	0.726418	0.013173	0.033875	0.571003	0.234925	0.054235	0.175559
MSTRG.10715.7	0	0	0	0.331497	0	0	0	0	0	0	0.030187	0.064845	0.024431	0	0.05176	0	0	0	0.014452	0.022431	0	0	0.119163	0.029492	0.068633	0.05294	0.035561	0.092679	0.073229	0.110717	0.015722	0.027385	0.106185	0.339279	0.413958	0.061649	0	0.040132	0.054125	0	0.06524	0.079847
MSTRG.10716.2	2.87492	3.35647	0.997391	2.56265	9.10994	14.3109	1.83575	2.0493	3.61775	4.55878	12.3261	3.61898	2.73977	2.18159	3.64618	2.93251	6.93653	2.21001	3.17702	8.56643	2.74551	3.41575	3.84676	8.72359	13.9565	28.3872	8.6474	20.9351	10.0174	12.6933	1.56255	1.44752	0.764067	13.6326	7.02713	11.0472	6.31371	3.44148	4.46328	5.60304	4.4073	5.21391
MSTRG.10719.1	0	0	0	3.53567	17.4131	0	12.6607	0	1.30444	3.79151	5.88325	0.05398	3.62424	0.069445	0.02017	3.3972	0.063088	5.60562	3.88292	6.59282	2.61168	1.78781	9.35505	6.38788	0.255226	0.272853	13.1735	18.1027	12.0293	13.5964	2.10134	3.05945	2.98406	5.71525	6.09087	6.80219	3.11572	5.08215	2.67745	1.51353	1.49438	1.97506
MSTRG.10721.2	43.6638	32.2615	24.7035	222.173	33.4749	94.519	93.7496	23.9396	44.8639	109.652	199.696	50.0384	83.0288	110.697	96.4354	78.9533	132.942	92.8365	64.9659	163.511	82.051	106.501	161.118	216.955	485.9	354.723	382.979	381.171	443.901	387.269	80.4766	124.087	124.823	244.832	285.418	335.395	420.931	508.357	562.121	179.861	103.8	121.221
MSTRG.10723.2	6.66218	9.32395	4.60381	0	2.30419	4.05126	11.507	7.66059	15.9312	0.442727	2.12138	0.1691	0.99783	0.479719	0.438245	0.495196	0.514263	0.280591	0.45452	1.14548	0.287788	0.380275	0.553401	0.488434	1.0987	1.39714	1.02451	0.81255	0.80334	1.9269	2.64967	1.31676	4.71221	0	0.775586	0.460104	0.159772	0.557541	0.377002	0.32456	0.881145	1.10495
MSTRG.10724.1	1.75208	1.21839	3.76909	7.1117	3.59439	4.75461	4.55192	2.63809	2.49213	2.61081	3.87634	1.32699	2.73242	1.92854	2.24659	0.591091	2.90898	1.86933	1.67998	2.44458	2.00313	2.11819	3.11022	4.07593	7.15521	3.75364	4.66463	7.13478	7.04141	3.65889	1.38253	2.94301	2.55011	4.10596	5.94991	6.48667	3.86705	3.08042	5.36247	1.28316	1.57674	2.36898
MSTRG.10725.10	0	0	0	0	0	0	0	0	0	0.154457	0.111138	1.70249	0.062414	0	0.106612	0	0	0.284341	0.71185	0.021118	0.027483	0.124535	1.7541	1.32655	1.9796	2.90453	0.0829	3.93158	6.86815	0.03119	0.319274	1.53464	0.732356	2.02563	0.973188	3.74443	0.68122	0.208297	0.218918	0.523369	0	0.073534
MSTRG.10725.2	0	0	0	0	0	0	0	0	0	0.249698	1.27037	0.579026	0.799244	0.25128	1.69217	0.839514	0.422069	0.567705	0.507889	0.676105	0.689447	0.934022	2.27247	2.20163	2.21834	1.51165	0.879652	0.495327	3.14359	0.404516	0.605598	0	4.40823	4.03278	15.6766	10.9497	4.32597	5.48599	2.43156	4.96841	0	3.04399
MSTRG.10725.5	2.77132	2.20639	2.80475	10.697	11.1428	8.16468	7.83473	5.34281	6.15391	2.93132	5.19594	2.48746	3.18982	2.2996	3.49666	2.38449	3.91596	2.61493	3.28802	3.40944	2.60721	3.8094	5.03927	5.78902	13.1609	11.54	8.48713	11.8905	8.58073	5.30998	0.964922	2.1849	1.84825	2.57157	3.76938	4.6417	1.13228	1.07619	0.822581	5.00518	2.84994	4.223
MSTRG.10725.6	0	0	1.33342	1.67427	0	0	1.0048	0	0	0.448821	1.51309	0.123917	4.03037	0.236888	2.14163	0.060114	0.479872	0.157	0.213676	0.119588	0.539529	0.889448	4.99039	0.78336	1.73892	1.7881	1.37786	1.78825	10.7235	3.98634	0.496335	0.778461	0.079865	1.19	2.11563	1.07842	1.44789	0.71833	0.44037	0.749771	4.12777	2.61737
MSTRG.10725.7	0	0	0	0	0	3.44261	0	0	0	3.0737	3.99915	1.41581	0	2.74267	0	2.32296	2.74061	2.28689	1.02681	4.88894	2.07787	0	0	2.85116	7.69391	3.89205	6.00622	3.75017	0.922913	13.6187	0	0	0.565549	7.07181	2.59511	3.0808	2.51822	4.99326	5.76366	0.452008	0.457438	0
MSTRG.10725.8	0	0	0	0	0	3.2325	0	0	0	0.116398	0.713295	0.077509	2.61051	0.152572	1.47622	0.036393	0.288727	0.074415	0.061045	0.065612	0.367457	1.20374	2.68969	0.37224	0.862339	0.905281	0.838169	0.791952	4.14344	2.9009	0.264755	0.080288	0.040227	0.686248	1.3058	0.713036	1.16072	0.561064	0.361334	0.113115	0.498726	2.59856
MSTRG.10727.1	0	0	0	0	0	0	0.709623	0	0	0.18948	0.719514	0.470606	0.436722	0.239863	0.834163	0.123858	0.52889	0.237482	0.368028	0.477278	0.260216	0.610192	1.37616	0.712985	2.12845	1.45873	1.57317	1.46839	2.39419	1.92134	0.41425	0.573813	0.831972	2.10387	3.27646	1.96792	1.15599	0.77762	0.927652	0.366931	0.557369	0.603557
MSTRG.10727.3	0	1.2797	0	0.530563	3.20933	0	0.49743	0	0	0.255353	0.462928	0.433601	0.304004	0.238517	0.53527	0.103337	0.291851	0.241015	0.399195	0.298982	0.203047	0.633267	1.22604	0.832952	1.72328	1.77489	0.761729	1.3225	2.65905	1.39735	0.150275	0.142788	0.199712	0.590244	0.997512	0.785965	0.31433	0.409816	0.335364	0.560884	0.680867	1.30197
MSTRG.10729.2	0	0	0	0	0	0	0	0	0	2.66033	2.83631	3.03224	1.86068	0	0	0	3.3051	0	1.34928	0.739367	3.40747	0.391814	4.92355	2.93382	7.15867	0	5.23161	6.2381	7.36429	8.72177	0	1.24578	2.58354	3.79348	8.18035	5.01882	0	5.16395	2.33844	1.67126	1.52429	1.32596
MSTRG.10733.1	2.09821	2.71204	3.39338	8.12611	6.77084	4.4306	6.05658	5.29867	4.29237	3.79037	6.45455	2.85561	3.17147	3.16675	5.01432	2.49848	3.52242	2.38602	2.126	5.29797	3.07479	2.53329	5.93299	7.91244	10.2922	7.59828	8.88791	13.6332	14.903	9.33222	1.2586	2.06374	2.32176	5.57341	7.22071	9.4846	7.80614	5.85227	8.81545	4.6735	5.08568	3.95242
MSTRG.10733.2	0	0	0	0	0	0	0	0	0	0	0	0.511549	0.129488	0.155734	1.2423	0	0	0	0	0.325299	0	0.257628	0.165691	0	0	0.959008	0.269685	0	0.988546	0	0.143874	0.115069	0.14352	0.617616	0.329708	0.233416	1.43951	0.520306	0.398918	0.18811	0.490925	0.18704
MSTRG.10734.1	2.78824	2.21802	2.66783	9.51683	7.58252	6.87569	4.50325	3.19695	3.91744	2.49311	6.35498	2.41514	2.73137	2.43693	3.74778	2.53811	3.91153	2.3362	2.51445	4.50889	1.98694	2.69947	4.75445	4.56341	12.9564	9.93174	9.26092	12.633	12.8955	10.9338	1.73111	1.76989	1.88397	6.27917	7.77296	9.10649	7.11743	6.42572	9.32611	3.33426	3.04414	3.27797
MSTRG.10734.4	0.469557	1.4159	0.938148	0	7.18562	5.756	0.35044	0	3.16529	0	0	0	0	1.43231	1.35159	0	0	0	0	0	0.991032	0	0	0	3.235	0	0	0	0	0	0	1.29872	0	0	2.72122	3.70564	0	0	0	0	0	0
MSTRG.10734.5	0	0.001322	0.00018	0	0.001424	0.015002	4.53231	0	0	1.94249	4.04239	1.40277	1.51539	0	1.19579	1.50893	2.33129	1.77768	1.68929	2.72525	0.400217	1.80325	3.38363	2.70946	7.97254	7.30274	6.07974	9.84696	11.1562	8.01896	0	0	0	3.4847	1.61671	0	3.99753	3.81082	5.2491	0	1.76495	2.43091
MSTRG.10736.1	3.80804	0	1.50966	3.75791	4.66628	4.8891	1.06803	3.78633	1.35788	0.506555	1.88907	0.339714	0.359215	0.72074	0.200285	0.513709	0.629025	0.363598	0.592263	0.674332	0.51807	0.340649	0.885216	0.479587	2.2011	2.10337	1.1202	3.38413	4.10202	2.6851	0.62355	0.174225	0.15148	2.73913	2.93576	0.910652	2.22368	1.43897	1.41998	0.788356	1.13641	0.583082
MSTRG.10737.1	0	0.023557	0.034345	0.194312	0.075829	0.090576	0.183645	0.08695	0	0.513959	1.58817	0.621319	0.676798	1.30856	0.118267	1.56287	2.33591	1.31096	0.684496	0.968639	0.634421	0.68104	0.979507	0.630754	3.30092	2.82914	3.45582	1.23994	1.78042	3.46723	1.21593	1.57288	0.645727	6.09741	4.41233	3.81887	1.72031	4.0032	5.07694	2.60558	3.25207	5.42565
MSTRG.10737.10	0	0	0	0.380862	0.078738	0.233805	0.092836	0.172953	0.006435	0.224876	1.70463	0.211838	0.296032	0.380838	0.399469	0.164464	0.361567	0.324597	0.379782	0.63775	0.333064	0.17293	0.531958	0.760756	1.56503	2.31467	2.46755	1.41938	3.0033	2.32055	1.61516	1.02393	0.708392	2.07642	1.72525	1.14806	0.481543	1.03598	1.93499	0.535515	0.271622	1.59301
MSTRG.10737.2	1.15924	1.63744	0.643554	11.3977	9.68242	10.4087	4.33538	2.88481	3.23475	0.352342	2.36354	0.247474	0.504965	0.317216	0.572639	0.236965	0.562503	0.619115	0.579333	1.09428	0.393963	0.392839	0.807464	1.23843	3.57965	3.05465	3.61189	3.09434	3.93912	3.79942	0.977136	0.717849	1.0394	3.1515	3.08854	5.06416	0.499815	1.18979	2.8909	0.644302	0.481782	1.80316
MSTRG.10737.5	0	0	0	0	0	0	0	0	0	0	0	0	0.503473	1.0126	1.40772	0.604482	0	0	0.137464	0.513924	0.105682	0.506699	0.562962	2.40154	2.4169	0.950261	0.530167	1.11284	1.7236	1.39613	0.851683	0.221125	3.19991	3.87798	6.87119	4.81767	1.66256	3.45695	5.8002	1.74509	0	4.30457
MSTRG.1074.1	0	0	0.07966	0	0	0.137251	0	0.076153	0.153346	0	0.264438	0	0	0	0	0	0	0	0	0	0	0	0	0	0	0	0.29284	0	0	0.053049	1.84308	0.969935	1.5639	0.229499	0.36186	0.370111	0	0	0.062106	0.171905	0	0
MSTRG.10741.1	1.37662	1.09446	0.987704	29.6575	2.64913	19.3274	18.6113	2.33048	3.54011	1.04577	1.59577	0.281063	0	0.381015	1.15826	0.325102	0	0.004789	0	0.904712	0	1.32896	0.675806	1.85575	0.588024	8.99977	3.95715	0.391791	2.51883	7.24511	0	0.068276	0	1.46023	2.52983	0.869028	0	0.03646	0	0	0.310094	0.762185
MSTRG.10741.2	0	0	0	0	0.629603	0	0	0	0	0.642818	11.5636	0.634267	0	0.022809	0.934284	0.342153	0	0	0	0.882464	0	1.97884	2.72973	2.73278	31.014	3.21413	13.2459	25.5534	26.1568	4.21562	0	0.012572	0	3.261	3.21133	5.77478	0	0.047731	0	0	0.045027	3.01598
MSTRG.10741.3	0	0	0	0	0	0	0	0	0	0.667248	1.40566	0.285214	0.004524	0.054685	0	0	5.29515	0.799774	1.87992	1.84776	1.28293	0.010306	1.78924	0	1.59989	7.48316	3.01779	5.31331	8.1581	10.1718	0.167579	0	0.176582	3.22642	1.15836	1.78892	0	2.88475	1.17008	0.022943	0	5.26864
MSTRG.10741.9	0	0	0	0	0	0	0	0	0	0.036306	0.118484	0.036427	0.010795	0	0.017737	0.030566	0.520276	0.216151	0.07487	0.198197	0.051597	0	0.353735	0.014493	0.127191	1.13293	0.221722	0.349331	0.416835	2.31444	0.122469	0	0.077166	1.97329	0.213636	0.299708	0	0.31302	0.015824	0.11606	0.053309	0.529529
MSTRG.10742.1	1.96861	1.71282	1.05877	10.9197	7.2099	6.77867	6.90188	2.57713	2.03654	0	0	1.53277	0.761407	0	0	1.40296	0.042054	0	0	0	0.454302	0	1.53512	0	0	7.37801	1.6154	0.066702	0.058675	6.58789	0.40735	0	0	6.15428	0.13733	0.083495	0	0.044572	0.04588	1.049	0	0.028187
MSTRG.10743.1	1.01301	0.768431	0.696666	8.74526	8.04612	7.48248	4.51943	2.52206	3.24238	2.84981	6.04033	1.81311	1.96982	2.29667	3.12378	2.07954	2.48147	1.48002	1.85889	2.88271	1.46632	1.49381	3.27553	4.92453	13.1187	13.36	10.389	10.1313	10.8372	12.9894	0.452379	0.590626	1.00186	8.39397	8.07461	7.81584	4.37407	5.29231	7.82198	2.85698	2.4296	5.17503
MSTRG.10745.1	2.20787	4.61957	1.60205	0.117198	11.5229	12.9184	0.625857	4.70493	6.6363	0.386593	1.45488	0.436593	0.346922	0.535879	0.537392	0.340712	0.682073	0.25459	0.330247	0.571988	0.191134	0.345533	0.703538	0.858342	2.99145	2.02383	2.26764	1.53896	1.4715	2.35074	1.65502	0.628245	0.403711	1.64854	1.84873	4.2156	1.15306	1.10852	1.99136	0.921826	0.701397	1.63062
MSTRG.10746.1	0	0	0	0	0	0	0	0	0	0.158887	0.05593	0.034137	0	0.029765	0.027738	0	0.043036	0	0.641062	0	0	0	0.03455	0	0.193222	0.184654	0.083964	0.506305	0.11164	0.108107	0	0	0	0	0	4.2691	0.001651	0	0	0.172018	0.032037	0
MSTRG.10747.2	0	0	0	0	0	0	0	0	0	0	0	0	0	0	0	0	0	0	0	0	0	0	0	0	0	0	0	0	0	0	0	0	0	0	5.47108	0	0	0	0	0	0	0
MSTRG.10748.1	1.40996	1.3463	1.4156	14.6135	7.99103	13.0141	8.39561	3.09487	3.38433	2.49545	5.51003	2.00496	2.55833	2.32538	2.91859	2.2552	2.51716	2.06838	1.6219	3.76846	1.74741	2.07826	3.93575	4.66975	16.047	11.4381	9.31836	13.5658	12.81	11.6463	0.435974	0.457984	0.586643	3.74468	3.30071	3.18178	1.16332	1.50989	1.66224	2.32287	2.25913	4.49768
MSTRG.10750.1	0	0	0	0	0	0	0	0	0	1.12504	0.788143	0	0.743584	2.04844	0.673191	0.307814	0.791976	0.369519	0	0.144676	0.03543	0.104195	0.843764	1.96928	0	0.08315	1.08386	0	0.58132	0	1.57245	0.293065	0.039333	0.806802	0.058257	0.610773	1.09151	1.41121	1.47623	0.218966	0.866834	1.6577
MSTRG.10753.6	0	0.148866	0	0.421785	0.582056	0.201408	0	0.076855	0	0.219794	0.399147	0.244744	0.078649	0.17456	0.180598	0.140073	0.08521	0.068389	0.113116	0.352366	0.15796	0.085986	0.13743	0.214997	1.05978	0.835606	1.76162	2.75824	1.08258	0.910943	0.846127	0.828561	0.621311	7.32779	5.17775	6.09323	3.14869	3.10356	5.71311	1.81515	1.7279	3.6389
MSTRG.10754.1	0	0	0	0	0	0	0	0	0	0	0	0	0	0	0	0	0	0	0	0	0	0	0	0	0	0	0	0	0	0	0	5.16115	0	0	0	0	0	0	0	0	0	0
MSTRG.1076.1	0	0	0	0	0	0	0	0	0	0.417373	1.15791	0	0	0.312506	0.400515	0.429809	0	0.302329	0	0.420814	0	0.437872	0.276691	0.502728	2.3602	2.24955	1.56162	2.17686	1.19196	3.7367	0.043057	0.301084	0.400827	2.32645	2.21665	3.80185	0.543043	0.033946	0.680811	0	0.297006	0
MSTRG.10760.1	0.363744	0.231068	0.176245	1.06041	0.93529	1.3452	0.795628	0.902187	0.99577	0.947538	3.0317	1.56989	0.775856	0.544464	1.55061	0.399463	0.90613	0.603422	0.961753	0.682624	0.687194	0.673655	0.622881	1.13818	3.62353	2.64479	1.33857	1.90968	2.68277	1.9879	0.925604	1.01733	1.67848	4.22229	4.51246	2.49146	3.59954	3.48686	5.515	3.3414	3.51703	4.32871
MSTRG.10764.1	27.2383	31.6507	19.0294	0	0	0	48.636	46.3662	41.1946	0	0	0.066449	0	0	0	0	0	0	0	0	0	0	0	0	0	0	0.080075	0	0.035898	0	17.0952	0.006962	0	0	0	0	0	0	0.210538	0.456406	0.108408	0
MSTRG.10764.3	0	0	0	59.5467	0	66.3139	0	0	0	1.21915	0.040309	0.00614	0.016064	0.049368	0.055684	0.008077	3.36683	0.0581	4.12283	0.096203	3.4509	0.046711	0.111458	0.081885	0.031866	0.037539	0.01307	0.053938	0	0.14345	4.76362	0.954698	3.10159	0.213939	0.193007	0.523537	0.089672	0.869209	0	1.43021	0	0.067791
MSTRG.10767.12	0	0	0	0	0	0	0	0	0	0.773741	0.911367	0.611769	0	0.309736	2.23313	0	0	1.19963	0.230775	1.08673	0.455807	0	2.22765	0	4.15888	2.6457	4.48729	2.23089	2.36569	5.58256	0.605599	0.280468	0.688294	4.16391	0.504179	0.084169	4.00626	0.895275	1.45375	0.292279	2.09855	0.933971
MSTRG.10767.7	1.48458	1.51477	0.863199	4.60352	9.21981	9.09228	6.01789	3.83663	3.14778	2.18194	2.16846	2.09556	2.19269	2.62758	0.23903	1.85131	0.029559	0.00838	0.040635	1.1675	1.3889	0.777307	0.146864	2.28675	7.11378	0.97114	5.67784	5.29046	7.84872	3.9789	0.02599	0.34035	0.324836	0.439263	4.20374	1.34423	0.338658	2.63546	0.738919	1.92469	2.42015	10.6285
MSTRG.10769.1	4.11482	7.46487	2.06375	50.6124	39.7911	46.1425	21.2358	11.7466	13.9133	5.72083	13.1251	5.41608	5.52854	5.31782	7.99948	5.69422	6.53701	4.95229	4.47522	8.71422	4.15773	5.76262	7.82165	9.71777	34.4267	23.6978	19.7838	22.0439	22.9032	23.2335	2.74341	2.93198	3.69202	23.6342	20.0353	19.9403	10.323	11.0218	11.9587	5.69214	7.28114	11.2097
MSTRG.10772.1	5.19554	9.02866	3.47996	38.1631	30.9225	39.7289	19.1352	15.3205	0	5.44226	10.5228	4.0788	5.92826	5.30485	7.25901	5.31858	7.26188	4.30943	4.20001	10.4751	4.72764	6.47384	9.84982	8.72004	28.0796	17.9624	17.1745	25.6001	20.8984	20.4008	2.0565	2.75939	2.36266	12.632	10.6923	9.67951	6.51274	7.72324	10.0946	4.75199	3.66576	9.52979
MSTRG.10774.1	0.848796	0.806679	0.974502	1.77464	0	0.292487	1.17531	3.09077	1.95968	1.15856	0.67031	1.3327	0.800641	1.24233	1.31474	0.933195	0.709528	0.85641	1.0383	1.02922	1.19559	0.899032	1.16462	1.17296	0.561111	0.728782	0.839082	0.427158	0.431381	0.718212	0.358391	0.479697	0.471217	0.855496	0.87708	0.871448	3.67805	1.37023	3.00999	2.35974	2.34847	2.03432
MSTRG.10774.2	0	2.04805	0.33619	0	0	0	0.50881	0	1.21213	0	0	0	0.181733	0.141874	0.383354	0.682495	0.017079	0.09174	0.254009	0.632649	0	0.263811	0.260999	0.130285	0.245007	0	0	0	0	0	0.627259	0.503157	1.29153	0	0	0	1.30014	0.700023	0.818063	0.323678	0.524673	0
MSTRG.10776.3	17.3771	0.570335	4.89203	6.14076	2.39992	11.4482	5.69512	30.1077	2.47652	14.7887	17.8198	8.53912	5.46393	5.97772	6.39115	6.21103	10.2266	5.95752	5.00445	12.367	3.03658	2.42265	8.03602	11.7383	25.6565	21.7205	18.9925	17.6467	18.3446	22.0695	4.27525	2.83625	5.12903	5.7785	4.58522	4.88692	6.83706	38.8831	18.7132	0.550463	0.264845	0.517556
MSTRG.10776.4	2.89282	12.4272	2.84185	4.06073	6.6276	3.61239	3.30658	1.55929	2.80344	17.5528	13.7133	10.4246	7.83104	5.46364	6.66575	5.28906	10.2634	6.92756	3.77323	9.8211	5.50795	3.43522	6.71154	15.4762	15.8025	16.1878	14.9292	17.2899	20.8272	19.5443	7.05727	9.41053	19.1939	3.99834	4.60902	5.12411	11.4708	41.0369	20.0517	2.37568	1.51167	1.33666
MSTRG.10776.5	0	0	0	0	0	0	0	0	0	1.49111	2.31589	3.21869	1.4722	0	1.07629	1.98924	0	2.30216	0.252399	0.141307	1.03829	0.92663	3.29604	4.95873	2.85636	3.33761	0.629694	8.92873	1.42563	4.79582	7.64738	6.30639	5.37488	0.65595	0.97646	0	3.2955	5.88275	11.6774	0.052122	0	0.135916
MSTRG.10776.6	0	0	0.108247	0	0	0	0	0.190077	0.51807	0.336095	0.386152	0.08609	0.200674	0.195703	0.267531	0.080082	0.35379	0.468473	0.195825	0.210659	0.129898	0.228634	0.332888	0.687799	2.36498	1.21382	0.865817	1.96246	1.51283	0.885356	0.881285	0.975342	2.87296	0.517374	1.07178	1.78253	2.23828	3.05537	1.77541	0.049746	0.077574	0.105111
MSTRG.10777.1	0	0	0	0	0	0	0	0	0	0	0	0	0.018175	0	0.039787	0.016405	0	0	0	0	0	0	0.003962	0	0.149446	0	0	0.111559	0.024265	0	0.312615	0.032833	0.235229	0.044337	0.055844	0	0.316233	1.73446	2.71725	0	0.125133	0.06723
MSTRG.10778.1	0	0	0	0	0	0	0	0	0	0.161147	0.079431	0.249802	0.103557	0.044723	0.230501	0.251909	0.078832	0	0	0	0	0	0.029633	0.052265	0.05992	0.050634	0	0	0.011135	0.021906	2.57651	1.39142	4.69618	0.050917	0.110713	0.093289	0.191792	0.254113	1.0829	0.170799	0.250012	0.229069
MSTRG.10778.2	0	0	0	0	0	0	0	0	0	0	0	0.005629	0	0	0	0	0	0	0	0	0	0	0.050479	0	0	0	0	0	0	0	0.946325	0.839986	1.66873	0	0	0	0	0	0.064157	0	0	0
MSTRG.10778.3	0.36116	0	0.178374	0.365636	0.400338	0.512235	0	0.170528	0.306567	0.017954	0	0.058306	0	0	0.034801	0.018245	0.006963	0.08045	0.089792	0.049889	0.026935	0.021115	0	0.037515	0	0.011229	0	0.050216	0	0	1.93905	1.54184	3.16891	0.183613	0	0.01723	0.031752	0.018626	0.234228	0.012388	0.004876	0
MSTRG.10780.1	0	0.751321	0	4.73379	0.499548	0	0	0	0	0.602229	1.77691	0.510394	0.518686	0.209952	0.852023	0.497824	1.5652	0.657967	0.485621	1.41598	0.227746	0.340968	0.988623	1.4486	5.34811	4.70288	1.82286	3.70414	3.0343	3.89817	1.25446	0.89425	1.02402	1.88976	2.68056	1.59562	1.71222	2.3295	5.00983	0.215516	0.434286	1.72996
MSTRG.10780.2	0	0	0	0	0	0	0	0	0	0.600782	1.60569	0.255867	1.03083	0.379426	0.887145	0.687513	1.49794	0.663406	0.795652	0.823636	0.428416	0.650886	1.41012	0.916968	5.97358	6.00646	3.91373	5.8892	3.75132	4.60544	1.27157	2.46957	2.29297	9.13903	4.95023	5.70091	4.33019	3.31934	8.77404	0.98728	0.355051	0.759143
MSTRG.10780.3	0.504185	0.27626	0.338742	0.922342	4.21178	5.39922	1.43888	3.05182	3.3579	0.281082	0.745471	0.130134	0.198895	0.198029	0.469335	0.243112	0.389301	0.20001	0.140746	0.436424	0.098932	0.068311	0.279828	0.337741	1.98726	2.22847	0.925747	1.20353	0.790512	1.71202	0.503092	0.624333	0.56867	2.5111	2.07296	1.49003	1.10317	1.49996	3.55802	0.619618	0.513534	2.07513
MSTRG.10781.2	0	0	0	0	0	0	0	0	0.886266	0	0	0	0	0	0	0	0	0	0	0	0	0	0	0	0.600013	0.233196	0.190521	0.365365	0.469248	0	2.15653	3.9651	4.0112	1.79928	4.42288	6.18422	1.1259	3.06232	0	0.114702	0	0
MSTRG.10783.1	0.299313	0.367989	0.184039	6.92244	6.69864	8.14801	4.19692	1.11661	1.24934	0.475406	2.22402	0.273925	0.544576	0.314936	0.826906	0.368147	1.32064	0.446563	0.393462	1.11767	0.424086	0.825256	2.16142	1.29692	6.93995	6.17768	4.4132	5.28621	4.55639	5.95357	0.82314	0.72188	1.02117	6.83052	6.97457	8.60796	1.23731	0.926621	0.998601	0.783232	0.396727	2.38503
MSTRG.10785.3	0	0	0	0	0	0	0	0	0	0.138399	0.144252	0	0.0752	0	0	0	0.040062	0	0	0	0.016495	0.09463	0.342885	0	0.429428	0.166313	0	0.560186	0.127466	0.185998	0.137082	0.190449	0.205934	0.483966	0.100442	2.73759	0.187178	0.447046	0.258806	0	0	0.170104
MSTRG.10789.1	0	1.39389	0.694597	1.73397	0.861319	0.961087	0.909607	1.01926	1.52965	0.36813	0.785299	0.116047	0.241608	0.215426	0.075158	0.112344	0.27563	0.135848	0.451915	0.446112	0.202567	0.184019	1.09027	0.536712	1.17832	1.40819	1.29734	1.94581	4.19167	1.44068	1.28987	0.938214	4.50217	2.79199	3.28377	10.3891	0.450937	0.229547	0.319597	0.248483	0.06511	0.402482
MSTRG.10789.2	0	0	0.371335	0	0	0	0	0	0	0.085494	0.434673	0.001307	0	0.004877	0.00095	0.018703	0.059216	0.023655	0	0	0.023341	0	0.32064	0	0.540608	1.17196	1.51447	0.025275	1.74814	0.236068	0	0	0.915349	1.24344	2.66969	13.1566	0.058898	0.034003	0.797544	0	0	0.007169
MSTRG.10789.4	0	0	0	0	0	0	0	0	0	0	0	0	0	0	0	0	0.029059	0	0	0	0	0	0	0	0.563775	0.290227	0.062028	0.145524	0.211426	0.287301	0	0	0	4.46646	0.571088	0.26587	0	0.272273	3.89872	0.014268	0.063073	0.333728
MSTRG.10789.6	0	0	0	0	0	0	0	0	7.48771	0	0	0	0	0.036264	0	0	0	0	0	0	0	0	1.16404	0	0	0	5.84216	0	0	0	9.81587	0	1.95834	0.286964	0	0.460536	0	0	0	0	0	0
MSTRG.10789.9	0	1.14755	1.41433	0	0	0	0	0	0	0.065628	1.99777	0.074377	0.084057	0	0.00065	0	0	0.173388	0.073477	0.121683	0.075011	0.206849	0.589937	0.280948	2.00093	1.74395	4.4634	1.74565	3.24928	1.37779	2.158	3.62923	9.10526	4.10095	63.0792	28.9909	0	0.500279	0.898212	0.144004	0	0
MSTRG.10790.1	0	0	0	0	0	0	0	0	0	0	0	0	0	0.03104	0	0	0	0	0	0	0	0	0	0	0.122121	0	0	0	0	0.111822	0.300879	1.35296	1.43833	4.33575	9.08521	8.22236	0	0	0	0	0	0
MSTRG.10790.3	0	0	0	0	0	0	0	0	0	3.60716	9.48495	3.74093	2.94249	2.29834	4.711	2.66825	5.37992	2.58001	2.54032	5.78915	1.94473	3.16321	6.34606	6.58928	33.3913	23.6987	15.7963	24.0575	20.9002	21.4226	1.10557	1.07814	2.02948	8.68332	8.072	6.39268	4.91852	7.87285	6.4837	3.75217	2.78229	6.72539
MSTRG.10800.3	0	1.39732	0.217999	3.21106	3.94792	7.21674	1.37925	1.92558	1.03435	13.6949	26.38	11.5474	26.6148	22.9551	18.519	19.861	22.7241	1.37135	15.0902	2.42168	31.4006	0.255498	27.7579	21.7798	72.1338	49.5348	39.0549	70.6457	0.832819	44.0618	3.87696	12.8933	7.7911	10.1514	10.4767	18.0116	5.35473	6.87544	8.09571	18.4178	13.8076	24.1126
MSTRG.10803.1	0	0.210315	0.491428	0.309567	0.059788	0	0.539738	0.12628	0.173243	1.43891	2.25186	1.23308	1.13558	0.384722	0.215257	0.247105	1.39411	0.255851	0.944364	1.39331	0.062319	1.3557	0.988138	1.87109	0.866829	3.63646	4.02945	5.23919	0.408883	1.23528	1.11974	0.504396	0.347401	0.023631	0.857118	1.31648	1.5596	0.558256	1.12115	0.36652	0.038009	0.398183
MSTRG.10803.2	0.739857	1.12273	0.713903	4.45437	5.1661	4.48269	2.25438	1.2944	2.32628	1.39604	3.06524	1.17615	1.32222	1.49093	2.24493	1.6358	1.10213	0.826374	1.12084	1.88409	1.36879	1.23054	1.89888	2.23914	9.55671	7.02041	4.6833	5.60876	6.34561	7.05424	0.659718	1.10423	1.19045	6.53505	8.00348	5.32133	2.80828	3.15764	4.13325	4.02991	3.69311	5.83701
MSTRG.10803.3	0	0	0	0	0	0	0	0.941946	0	0	0.240132	0	0	0.760922	0	0	0.335346	1.32917	0	0	0.365406	0	0	0	0	0	0	0	0.431774	0	0	0	0	2.27412	0	0	0	0	0	0	0.327776	0
MSTRG.10803.9	0	0	0	0	0	0	0	0	0	0.757713	0.59175	0	0.42377	0	0.79585	0.668012	1.66968	0.672437	0.318432	0	0.521259	0.79843	1.8417	0.759784	5.52145	2.63668	1.85954	1.19297	4.04908	0	0	1.79484	2.12683	3.07226	5.07982	3.9605	3.94471	7.60967	7.17639	0.104685	0.114514	0.267166
MSTRG.10805.2	0	0	0	0	0	0	0	0	0	9.74531	11.8033	0	3.08966	7.09057	12.624	8.61988	9.96937	3.69842	6.89565	15.3712	9.20833	12.9797	8.72466	15.2245	10.2268	4.56858	20.4389	10.1554	15.0454	5.61933	5.87875	9.71587	6.1664	11.072	14.7099	21.4437	11.5172	26.145	37.8443	8.82169	1.62521	2.33741
MSTRG.10806.1	13.6283	17.6361	17.275	10.6386	11.823	11.713	12.4937	12.2277	16.9973	9.00465	12.6866	11.7311	6.74303	4.55525	12.8099	10.423	5.75939	6.82078	7.73996	7.50804	3.25235	6.62287	10.0339	16.0806	8.46712	4.89998	11.1393	4.75197	12.8336	12.3475	3.03225	4.74567	4.85839	4.18734	7.7525	6.55713	6.76706	8.20051	10.3772	7.51612	6.7932	4.42772
MSTRG.10806.4	0	0	0	0	0	0	0	0	0	0.266607	0.574504	0.12823	0.129748	0	0.295683	0	0.115199	0.193709	0.446828	0	0	0.085855	0.245376	0.960922	0	0	0.247552	0.197921	0.271907	0.926197	0.616417	0.347981	0.926415	0.15194	0.383953	0	1.77584	0.907735	1.52012	0	0	0
MSTRG.1081.1	0	0	0	0.469448	0	0	0.683257	0	0.507878	0.057343	0	0.048318	0	0.083648	0.039242	0.168873	0	0.13805	0.042196	0.043341	0	0.058641	0.407295	0.049363	0.202898	0	0.069929	0	0	1.62473	0.046322	0.456304	0.154644	1.12452	0.202665	0.904379	2.25094	2.35005	0.387677	0.56836	0.294602	0.693943
MSTRG.10811.3	0.836949	0.655688	0.481788	13.1866	9.90723	10.8399	11.0258	1.60743	1.17914	0.932147	2.41653	0.359668	0.695157	0.262366	0.668204	0.533953	1.79606	0.586104	0.414021	1.63163	0.264621	0.805805	1.31582	1.0234	6.10691	7.00709	1.80732	3.08399	4.62678	9.00247	0.206215	0.255481	0.335167	3.70476	2.13205	0.944043	1.07833	2.29519	0.869781	0.528323	0.38846	3.88704
MSTRG.10815.8	0	0	0	0	0	0	0	0	0	0.072702	0.327889	0.024953	0.009233	0.002153	0.013034	0	0.07036	0.040666	0.02201	0.10673	0.018925	0	0.120559	0.014115	0.923715	1.30389	0.081638	0.242669	0.780051	0.288742	0.007235	0.708594	0.635439	0.190288	0.293234	0.876583	0.164333	1.6132	0.085026	0.015336	0.01554	0
MSTRG.10815.9	0	0	0	0	0	0	0	0	0	0	0.380906	0	0.032975	0	0.104812	0.015259	0.540888	0.012111	0.019407	0.112494	0	0.002604	0	0.231272	2.30218	1.12306	0.250687	0.889161	0.134393	0.280167	0	0	0	0.365618	0.092209	0.904479	0.159784	1.43202	0	0.017158	0.018952	0.023448
MSTRG.1082.1	0	0.380856	0	0.01359	0	0	0	0	0.548004	0.636322	0.429657	2e-06	0.283645	0	0.047739	0.590777	0.035078	0.57348	0.718194	0.2875	0.573008	0.628026	0.641481	0.635754	1.22172	1.72862	1.16549	0.703261	0.471943	1.9822	2.38804	1.24474	4.06696	12.186	2.84014	12.5959	2.10032	5.2789	3.39894	0.652474	0.025769	0.037091
MSTRG.1082.2	0.750355	1.38481	0.436704	9.38986	3.79851	4.24325	5.19338	1.12197	1.90254	0.850905	0.076626	0.383477	0	1.02858	0.559257	0.664076	0	0.465285	0.556339	0	0.499419	0	0	0	1.29561	1.5233	0	0.052956	0.703688	0	0	1.32495	0.034511	0.200534	0	0.176422	2.21693	2.53141	0	0	0	5.86531
MSTRG.1082.3	4.95607	3.98838	3.31038	17.3703	26.0165	30.0115	7.53869	10.426	10.0258	7.16772	12.521	7.22077	7.21225	8.34588	8.42135	6.97036	8.43009	5.28099	5.90457	8.00558	6.39589	6.50157	8.99032	11.3199	32.9076	27.4374	21.1477	20.9236	20.4889	24.7336	5.54223	3.98249	9.61295	1.85374	21.6341	21.3176	8.76365	10.691	4.75896	10.896	10.6008	7.42207
MSTRG.1082.4	0	0	0	0	0	0	0	0	1.22953	0	0	0	0	0	0	0	0	0	0	0	0	0	0	0	0	0	0	0	0	0	0	5.463	0	15.7878	7.65999	0	0	0	8.3298	0	0	7.81652
MSTRG.1082.6	0	0.513376	0	0	0	0	0	0	0.193975	0	1.84488	0.919783	0.705626	0.283204	0	0	0.614193	0	0	0.788414	0	0.556221	0.559886	1.14801	0.952322	1.50798	1.89044	1.69027	1.44986	2.15741	1.46975	0.882126	2.60989	12.1687	10.4868	7.22773	1.60871	1.78001	4.10085	5.24005	4.99602	2.48537
MSTRG.1082.9	0	0	0	0	0.237323	0	0	0	0	0.004916	0.047549	0.146745	0.09101	0.062668	0.042369	0.112708	0.019766	0	0.05681	0.052756	0.009579	0.032644	0.056678	0.005329	0.283999	0.322691	0.250223	0.050217	0.318068	0.123185	8.91982	12.6296	6.26277	2.69035	1.38852	1.20444	0.537199	0.71863	1.3662	0.219718	0.336822	0.832628
MSTRG.10826.1	3.51587	4.75908	2.51764	14.3255	13.0506	15.4197	11.0941	6.26246	8.57476	4.57104	9.22843	3.47571	3.39185	3.52367	5.11898	3.51695	4.40581	2.90665	2.88987	5.17449	2.72328	3.96034	6.28209	6.52666	21.1261	16.0869	13.4225	18.7757	17.7363	16.959	1.51781	2.87501	2.68716	8.25823	9.30095	9.39163	6.38698	7.02218	8.71434	4.67398	3.91647	5.73785
MSTRG.10828.1	1.07791	0	0	0	5.51965	7.53087	3.41533	0	2.84268	0.661718	0.862644	0.427468	0.104989	0.046597	0.499849	0.149378	0.437312	0.268547	0.121516	0.579964	0.265357	0.325586	1.05056	1.26323	2.73491	1.76268	3.74573	2.80582	6.52508	3.21776	0	0	0	0.747478	4.73298	7.28712	0.174141	1.64722	0.296756	0	0	0.95903
MSTRG.10828.2	0	0	0	0	0	0	0	0	0	1.196	8.55866	1.22792	1.62881	0.599784	3.29132	1.65025	6.54929	1.89244	1.09292	2.22344	0	0	0.182362	4.27432	7.29655	12.3889	11.3497	3.26223	3.22251	14.8791	0.541998	1.77084	1.57022	0.966269	13.0891	0.467398	3.09381	1.313	1.94895	1.45197	0.833696	2.77846
MSTRG.10828.8	0	0	0	0	0	0	0	0	0	1.93806	3.73556	1.46896	1.46937	1.55573	2.37019	1.42404	1.92132	2.03549	1.43894	2.7914	1.27449	2.17212	2.59797	2.68829	6.58919	6.70132	6.31246	5.76423	4.72994	8.44642	0.650459	0.729269	0.84953	5.54509	3.17931	0.251691	4.24101	5.13624	3.27473	1.8257	2.20943	2.56099
MSTRG.10836.1	4.02519	4.31446	1.79967	10.2144	11.6789	7.67263	4.39664	9.68801	3.4873	2.14792	3.38617	1.22723	0.955642	0.732149	1.14299	0.99068	1.33528	1.49857	1.49672	2.5297	1.12121	1.45114	1.79077	2.65973	12.6521	7.08267	6.81943	11.9791	7.53044	7.18263	0.132917	0.837038	0.689883	3.29322	4.88988	4.02977	2.99239	2.87502	2.1717	0.83394	0.825649	3.02073
MSTRG.10836.2	0	0	1.24205	27.5889	21.1957	27.7656	12.0993	0	10.2313	2.69794	8.00328	2.16983	2.16588	1.89733	3.5782	2.34852	4.60543	3.26	1.6396	4.36152	1.92855	3.32829	8.29883	3.98808	20.4997	17.1907	13.7288	14.8712	17.5139	14.5103	1.21027	1.00619	1.02513	12.0688	7.99189	6.9375	4.89811	6.65485	4.67443	2.10579	1.98049	5.70921
MSTRG.10837.1	0	0	0	0	0	0	0	0	0	0	0	0	0	0	0	0	0.052868	0	0	0	0.615434	0	0.026867	0	1.99035	0.689114	2.1006	0.1495	0	0	0	0.256094	0	0	0.024089	3.81719	2.23203	0.021332	0	0	0	0
MSTRG.10837.2	4.80353	5.32444	3.38574	139.299	91.8761	0	0	12.5276	19.3168	0	0	0	0	0	0	0	0	0	0	0	0	0	0	0	0.027055	0.022734	0	0	0	0	0	0	0	0	6.18857	0.041576	0	0	0	0	0.985703	0
MSTRG.10837.3	0	0	0	0	0	0	0	0	0	0	3.05452	0.524887	0.768879	1.4887	0.51228	0.272575	1.54358	0.873206	0.316696	1.40585	0.177594	1.09894	1.49343	2.58866	9.79539	2.95268	6.03378	10.7973	7.30935	2.74979	0.571933	0	0.092789	12.6329	8.84882	10.7594	0.511927	0.309882	1.19725	0	0	1.28525
MSTRG.1084.3	0.774286	0.208416	0	0	0	0	0.486136	0	0.125586	1.9033	2.45243	1.63473	1.9518	1.28991	0.974527	0.839216	1.00898	0.620801	1.67883	2.15837	2.57436	0.669633	0.874542	2.75415	7.51024	8.14768	5.02373	3.297	3.29148	5.08171	1.54088	1.85154	1.1552	2.61918	2.61118	2.57701	4.46294	2.48954	4.86734	1.86247	1.75559	1.71085
MSTRG.10843.1	1.80046	0	0.142704	1.13057	4.16043	4.5472	2.1996	1.642	1.44265	0.276541	0.816729	0.355526	0.320025	0.468255	0.349507	0.443926	0.798829	0.400961	0.397405	0.887437	0.492256	0.583752	0.675831	0.645839	0.941581	1.40768	1.15735	0.901847	1.19996	1.51746	0.388956	0	0.157921	0.631703	0	1.98276	0.545044	1.03231	4.88644	0.379827	0.407314	0.276123
MSTRG.10843.3	0	0	0	0	0	0	0	0	0	11.6263	27.0643	9.17463	11.1572	14.464	15.3775	12.3633	16.4218	13.3138	12.802	17.1097	13.8634	16.095	23.5986	25.8517	58.8699	39.7198	54.3601	51.6895	57.7328	48.663	8.24511	9.15311	9.90021	20.3223	20.3053	18.3688	17.8111	18.533	10.3947	9.29884	5.14889	10.1266
MSTRG.10845.1	1.05708	2.20807	1.68497	18.5974	17.4334	14.3	9.00439	4.21268	5.01161	2.02261	4.83835	0.676855	1.06386	0.976142	1.93618	0.86226	3.04987	1.33148	1.7492	1.71688	0.939586	2.36522	2.55013	1.92091	13.0307	2.9814	1.71905	8.27325	10.5884	4.42538	1.00697	0.497315	1.52231	4.00783	9.67745	3.86111	0.687371	3.61362	4.96432	1.43742	1.23712	1.31897
MSTRG.10847.1	3.2903	4.21871	4.85255	11.4877	10.6286	18.1836	2.06201	5.80825	7.53701	2.22978	4.39457	2.22388	2.20436	2.03751	2.60167	1.78378	2.02823	2.48261	2.15289	3.24749	1.7662	2.31978	4.43789	4.0504	9.37503	9.65122	8.48938	9.72818	10.8555	8.43136	0.395543	0.442945	0.300532	6.96625	4.08844	5.51625	4.18431	3.66236	3.42994	1.02993	1.41344	0.412468
MSTRG.10849.11	0	0	0	0	0	0	0	0	0	0	0	0	0	0	0	0	0	0	0	0	0	0	0	0	0	0	0	0	0	0	0	0	0	0	4.52016	0	0	0	0	0	0	0
MSTRG.10849.8	0	1.49712	3.38456	0	11.8281	0	10.9321	4.00323	9.71059	1.89868	2.63662	1.38689	4.08657	3.23726	1.46485	1.20757	1.98399	1.00028	3.79675	7.56494	0.571109	1.36316	2.72783	2.76165	14.0758	8.03879	3.41432	11.1181	6.10979	8.85863	0.189942	1.28944	0.275736	3.41961	2.26782	1.20081	0.376651	4.00174	0.375396	3.60401	1.61876	1.95318
MSTRG.10849.9	0	0	0	0	0	0	0	0	0	1.6259	2.18811	0.83389	0	0	0.898558	1.05628	1.97073	1.00381	0	0	0.510597	1.15326	1.89084	3.58323	5.25798	16.7382	4.11173	9.08349	9.95693	8.63537	0.800174	0	0.890675	7.86219	5.75168	5.80377	1.65619	0	1.44369	0	0.775087	5.31262
MSTRG.1085.3	1.64983	1.7447	0.57376	5.38749	0	7.39724	5.27765	4.59955	3.42392	1.4008	2.78438	1.70968	1.71554	2.15362	1.5499	3.76189	1.68774	1.11722	2.27686	1.60037	1.31438	1.82367	2.04625	1.72148	4.65988	3.74694	1.57768	2.46853	3.21221	3.93162	1.58942	4.34669	0.464956	0.307819	2.62712	3.83952	0.445806	6.99121	20.0856	1.79311	1.2387	2.08136
MSTRG.1085.5	0	0	0	0	7.78871	0	0	0	0	0.170418	0	0.076826	0	0.364165	0.132157	0	0	0.166401	0	0.127379	0.066211	0.082947	0	0	0	0	0	0	0.192922	0	0.108179	0.165645	0.059345	0.116725	0.898641	0	0	0.383058	0.269511	0.597572	0.18703	0
MSTRG.10855.1	0.789705	0.480829	1.41845	3.80313	5.2152	4.60869	2.56998	1.51071	2.65956	1.96215	5.393	1.96643	1.43333	1.53326	2.16336	2.30795	3.30843	2.19286	1.18002	3.65712	1.46533	1.66218	5.09425	3.77008	11.8663	11.746	8.0581	12.4239	12.8605	9.88949	0.948653	0.711894	1.28171	8.66521	6.70859	5.69741	3.33039	4.98845	3.82645	1.51368	0.470269	2.07341
MSTRG.10855.3	0	0	0	0	0	0	0	0	0	0	0.15281	0.202748	0.097906	0	0	0.091047	0	0	0	0	0.102196	0.203396	0.114568	0.064278	0.780794	0.125354	0.38573	0.1403	1.89088	0.87233	0.146729	0.05948	0.088987	0.99033	0	1.55394	1.90278	1.08305	2.63856	0.506425	0	0.411714
MSTRG.10856.1	1.67115	0.277369	1.59467	3.07552	4.82281	2.38382	0.822071	2.98704	1.66653	1.44026	2.84486	1.19775	1.94527	1.59843	1.63961	1.20507	2.47835	1.96689	2.29712	2.94292	1.62465	3.00284	3.09897	2.67289	7.05941	6.91978	6.11294	4.89599	6.14495	7.1205	0.935894	0.598232	1.10391	5.22055	5.82071	4.11831	2.77865	3.23758	4.66918	3.57415	3.41877	4.78573
MSTRG.10859.1	0	0	0	4.5285	0	2.13137	0	0	0	0	1.61764	0	0.121515	0.120208	0.042432	0	4.05503	0.193631	0	0.270906	0.150451	0.53177	1.52157	0	4.34247	7.20163	6.1077	13.9191	14.4989	6.63935	0.054582	0.341586	0.523964	3.9706	3.57362	11.6228	1.48085	2.9144	6.98908	0.34917	0	0
MSTRG.10860.1	0	0	0	0	0.290919	0	0	0	0	0	0.254811	0.028025	0.029076	0	0.19641	0.018197	0.679254	0.465803	0	0.099369	0.051838	0.100119	0.319583	0.087983	0.397004	0.729082	0.358747	0.565975	0.714126	0.334939	0.091869	0	0	0.090033	1.45272	1.55378	0.368699	0.38453	1.18153	0	0.068043	0.127616
MSTRG.10860.2	0.544618	0.159182	0.722945	7.11663	4.13953	9.02122	2.39631	2.19071	4.20018	1.23116	2.79698	0.714589	0.989197	0.50633	1.65248	0.355952	2.17459	0.641991	0.570522	2.61794	0.421599	0.912418	2.13849	1.97431	16.7088	13.6603	5.87981	10.0516	8.98819	10.9099	0.281698	0.45061	0.912233	5.55149	8.29299	7.78831	2.04467	3.31426	3.61541	1.30564	0.865106	2.94876
MSTRG.10860.3	0.786066	0	0	0	0	0.648639	2.38031	0	0	0.291213	2.47959	0.308348	0.200802	0.217916	0.467012	0.333123	0.62591	0.093805	0.379086	1.84974	0.393306	0.458361	0.809457	1.07432	7.14135	5.31972	2.10532	4.70982	4.63288	3.12648	0.115702	0.310606	0.353026	4.19118	3.41971	3.88138	0.920512	1.70885	1.12869	0.035711	0	0.667378
MSTRG.10865.4	0	0	0	0	0	0	0	0	0	1.20451	2.85116	1.04064	1.096	1.25542	0.661701	1.71835	2.28693	0.623283	0.527243	1.46912	1.28267	1.104	1.95039	4.46395	8.01232	7.70834	5.19373	7.10859	9.33261	7.60748	2.17345	1.03658	2.43594	15.8328	9.66916	7.44083	9.8687	11.4629	9.73329	2.27074	1.95156	3.34616
MSTRG.10866.2	0	0.037791	0	0	0	0	0	0	0	1.29811	2.31669	1.34668	0.350331	0.323738	0.33169	0.479752	1.27126	1.06968	1.16522	2.49863	1.14233	1.05814	2.22484	2.30594	7.04329	3.83636	2.76525	5.58236	3.61341	4.28532	0.339616	0.170313	0.390759	4.2825	0.373854	0.801838	1.07951	0.896894	1.53129	0.743946	0.415714	1.61411
MSTRG.1087.1	0	0	0	13.4408	0	0	0	0	0	0	3.5761	2.08333	0	1.57071	0.05603	0	0	0.164037	2.35859	1.85171	2.69747	0	3.25757	3.63341	10.8675	5.74897	9.38016	5.98162	0	12.1617	0.006743	0.345597	0.001851	6.46096	5.6364	3.74533	0.25433	0	5.15691	0	1.60822	0.108445
MSTRG.1087.2	3.08049	5.13761	2.19283	0	0	15.1547	9.24328	6.39331	8.27386	0.023629	0	0	0	0	0.025217	0.025974	0	0.025115	0	0	0	0	0	0.069148	0	0	0	0	0.192788	0	0	0	2.34339	0	0	0	2.80405	0.049434	0	0	0	0
MSTRG.1087.3	0	0	0	0	11.5482	0	0	0	0	3.21172	0	0	2.64911	0	4.38416	3.09131	4.07386	2.90323	0	0	0	4.12761	0	0	0	0	0	0	5.64336	0	1.14324	0	0	0	0	0	0	3.46998	0	2.91768	0	2.84331
MSTRG.10876.1	0	0	0	0	0	0	0	2.10722	0	0.143322	0.673	0	0	0.107072	0	0.063141	0.125437	0	0	0	0.108108	0	0.093169	0.827793	0.516063	0.287612	0	0.666187	1.52404	0.570859	0.086235	0.033542	0.05067	0.575823	1.54599	1.15297	0.922907	0.456318	0.521643	0	0	0.642623
MSTRG.10876.3	0	0	0	0	0	0	0	0	0	0.114015	0	0	0	0	0	0	0	0.075214	0	0	0	0.136091	0	0	0.229664	0	0	0	0.129786	0	0.465568	0.145936	0.632897	0.649724	0.807679	0.55141	0	0	0.260336	0	0	0
MSTRG.1088.4	0	0	0	0	0	0	0	0	0	0.522788	1.86492	0	0	0	0.71657	0.07263	0	0.555526	0	0	0	0	0.216255	1.32605	3.49907	2.67825	3.82491	3.41075	1.73029	1.32926	1.21961	0.184856	3.20022	1.25805	3.22411	3.55255	6.3743	3.30349	5.94038	0	0.592852	2.30923
MSTRG.10881.1	8.70909	6.35352	8.43339	35.0066	28.3226	27.3537	18.6355	20.8445	18.5175	11.3276	27.1984	5.47926	9.89795	6.74464	16.447	17.6288	9.8592	7.54802	6.33882	10.1658	5.22196	11.7033	25.7579	11.2563	33.6242	23.3191	17.6973	23.816	33.0765	16.8801	10.7939	3.83108	9.71652	16.0216	12.3954	4.96504	1.7644	4.78133	7.64256	7.69106	4.3287	10.547
MSTRG.10881.2	0	0	0	0	0	0	0	0	0	0	0	1.22613	0.722422	0	1.49677	0	0.852114	0	0.585471	0	1.17459	2.60869	2.55664	2.89607	1.73026	0	8.37297	10.5369	6.17878	22.029	0.62667	5.97356	1.78494	0	8.18372	28.9655	1.03297	0	0	0	0.6425	0
MSTRG.10882.1	0	0	0	0	0	0	0	0	0	0.071433	0.242707	0.070449	0.095178	0.028417	0.181948	0.087155	0.080143	0.109582	0.1364	0.168634	0.047409	0.267526	0.165164	0.254359	1.1179	0.567881	0.497326	1.0361	1.06669	0.756241	0.024796	0.082772	0.050517	0.248243	0.31278	0.457757	0.029416	0.094994	0.107517	0.068116	0.112137	0.241478
MSTRG.10886.2	0	1.02543	1.26903	4.99962	2.23027	4.84482	3.82734	2.07029	3.34754	0.13733	0.239573	0.161747	0.349963	0.199871	0.756379	1.06746	0.29482	0.202529	0.549225	0.943018	0.347021	0.151652	0.690175	0.489944	1.63066	0.484536	0.462247	2.49873	4.00917	1.6438	0.441875	0.231148	0.335872	1.11099	2.6473	3.86243	0.971204	1.08759	2.95416	0.978208	0.457682	1.40917
MSTRG.10888.4	0	0.22179	0.064847	0.647651	1.95924	1.09344	0.348519	0.43556	0.926913	1.89947	3.02065	0.911444	2.39632	0.758743	2.26015	1.22666	2.39627	1.39836	1.621	3.67383	1.02991	1.21833	4.64174	2.44486	17.0376	13.5031	8.35561	11.04	8.99828	17.1131	0.589113	0.754914	0.743519	9.23805	7.52291	7.13192	3.29211	3.70033	4.53517	4.07206	2.92524	3.62184
MSTRG.1089.3	33.0197	14.6669	21.4675	36.4499	170.758	3.48311	83.8863	40.5467	59.7175	28.4025	31.0091	27.963	14.5111	34.0996	48.6692	32.3681	15.9052	13.9294	20.5462	37.4217	17.6418	24.5731	30.0509	38.5279	95.7335	133.699	148.436	79.5927	54.8048	87.4264	4.91095	7.86453	11.1665	90.8158	85.2402	50.3277	28.2126	30.2613	44.1701	24.3881	26.1607	55.6072
MSTRG.1089.4	0	0	0	56.7469	0	181.013	0	0	0	2.85237	55.1321	2.2609	15.2596	1.89894	3.52	4.0578	17.1963	1.08725	3.25006	5.58514	2.49638	2.92162	26.1042	6.69832	53.3179	91.0557	9.33196	8.44509	71.9415	133.352	5.10926	0.229529	5.36539	98.6777	44.2708	58.3075	17.4243	40.4507	34.0888	6.36551	5.03141	16.8092
MSTRG.1089.5	0	43.2041	0	0	0	0	0	0	0	0.294452	0	0	0	0	0	0	0	0	0	0	0.197693	0	0.400332	0.180544	0.531064	0.772961	0.056248	0	0	0	8.14928	14.9371	9.16545	0.612842	0	0.95492	0	0	0	0	0	0
MSTRG.10891.1	11.3657	9.62343	6.99593	32.8425	13.1331	18.9902	26.5241	19.4723	17.2155	11.9617	13.8609	8.18956	10.7382	14.3479	13.6869	14.0008	13.6082	10.5364	10.237	15.9529	10.0045	17.0791	16.9418	7.78945	19.8333	26.9975	10.716	21.2733	19.4039	22.8268	3.45648	2.50098	1.62586	13.2812	4.99436	3.60174	15.9433	18.8072	23.9067	15.7843	10.2719	11.8161
MSTRG.10891.2	0	0	0	0	0	0	0	0	0	0.297776	0.062638	0.242366	0.098872	0.182344	0.182384	0.216382	0.258142	0.116167	0.081504	0.117142	0.302652	0.275646	0.107363	0.68334	1.45578	1.85259	1.25956	1.25963	1.41859	1.27231	0.203386	0.581281	0.479897	1.02589	1.10082	1.26363	1.24553	3.32904	2.46542	1.10794	0.453778	0.587643
MSTRG.10891.3	0	0	0	0	0	0	0	0	0	0.560972	1.11783	0	0	0	0	1.19643	0	0	0	0	0	0	0	3.79746	8.3718	0	5.54744	2.611	6.09213	1.07966	0	3.04213	3.57579	0	9.26569	10.1389	0	0	0	0	0	0
MSTRG.1090.1	10.1939	11.2774	5.56356	56.2912	27.0223	64.6078	33.016	21.5143	28.381	7.26795	33.0876	3.9666	5.19888	9.27425	11.668	5.97372	7.60294	5.69795	7.47729	8.85796	4.82772	7.28056	11.5824	12.5947	48.248	33.4575	78.2038	25.6571	52.537	50.3295	12.7658	18.9835	5.52465	54.5521	61.9772	90.684	43.3198	13.4895	24.327	18.7539	19.1706	22.9606
MSTRG.10903.1	0	0	0	2.71422	0	0	0	0	0	1.40126	0	0	0	0	0	0.41238	1.58879	0	0	0	0	0	0.843973	0	1.03356	0	6.10709	0	0	0	0.35589	0	0.393499	0.233595	0	0	0.632244	0	3.47648	0	0	0
MSTRG.10903.6	0	0	0	0	0	0	0	0	0	5.21571	5.80015	3.10782	7.81606	2.82889	1.72525	3.17526	2.51089	2.3562	0	2.88055	1.31599	2.04819	4.26294	5.98507	13.4865	5.22502	8.35863	11.3061	14.131	42.5059	3.41071	1.2852	4.86615	18.5423	17.4476	9.05006	9.53736	9.13634	14.3439	2.0332	2.358	1.65406
MSTRG.10906.1	4.19127	4.78045	4.22777	15.251	13.7526	13.6385	9.57683	8.08437	7.64119	2.6321	5.30129	2.3425	2.75555	2.51523	3.26415	2.73307	2.93144	2.642	2.43953	4.23946	2.3099	3.45037	5.03987	5.92272	10.7839	9.8149	7.55818	10.3725	9.50627	10.5493	0.877925	1.98797	1.31289	8.52117	10.2394	9.03222	6.36934	6.31808	9.78792	3.06034	2.62444	4.71378
MSTRG.10906.5	0.846012	0.84798	0.543164	7.66241	5.98126	6.50749	2.68939	3.05631	2.38848	1.09413	2.15044	0.571135	1.39771	1.21066	1.4219	1.05997	1.56781	0.947531	1.28429	2.04763	1.52558	1.1857	1.57852	2.43953	6.74153	5.0629	5.3206	5.12646	4.77234	5.45331	1.99595	1.64801	2.77028	7.22814	8.11213	12.3422	7.54122	7.16099	22.1868	2.91061	2.30417	3.34421
MSTRG.10908.1	0	0	0	0	0	0	0.162636	0.18396	0	0.691206	0.532428	0.285058	0.342094	0.143859	0.609099	0.367412	0.345504	0.226861	0.575294	0.964495	0.756189	0.205193	0.73312	0.513684	1.3457	0.119277	0.771051	0.593125	1.21198	0.599875	0.321377	0.035081	0.721163	0.64564	0.077937	0.296422	1.73504	0.530481	1.05021	0.239209	0.252422	0.151559
MSTRG.10910.3	0	0	0	59.3114	0	0	0	0	0	4.85938	8.93238	2.60822	4.28633	4.11454	2.96468	3.06251	3.94405	4.81994	2.45198	2.41783	2.5949	4.60837	5.07409	10.4874	27.2993	19.0566	16.3576	20.4051	20.3611	19.2692	0.203147	0.120709	0.13663	4.51082	3.78972	1.83546	1.07651	2.5065	1.44633	2.06169	1.07656	1.97245
MSTRG.10912.4	0.8913	0.693687	0.564479	5.55285	6.13571	6.69159	5.60764	3.36165	3.435	0.018232	0.019268	0.010972	0.001042	0.014555	0.003124	0	0.076883	0.13837	1.28545	0.000413	0.008528	0	0.182812	0.005283	0.053997	0.013176	0.000504	0.034674	0.038632	0.032487	0.008927	0.01821	0.155366	1.13473	1.80341	0.499216	0.172749	1.05677	0.050147	0.047861	0.042679	5.56109
MSTRG.10912.5	0	0	0	0	0	0	0	0	0	2.99533	4.06428	1.64559	1.61835	1.24861	0.031101	1.07366	2.23978	1.92583	0	3.16805	0.063678	0.031883	0.552862	0.048513	12.712	14.4559	7.22625	0.282182	9.22876	11.3168	0.209612	0	1.86008	6.90662	12.1019	7.95449	2.73229	3.41118	4.42431	3.39155	0.672978	1.37444
MSTRG.10912.6	0	0	0	0	0	0	0	0	0	0	0	0	0.00605	0.000814	0	0.017797	0	0	0	0.01275	0	0	0	0	0.010428	0.589547	1.25115	0	0.009074	0.004476	0.806224	1.8947	1.60947	9.70932	2.74778	5.64105	4.60247	3.12435	4.1191	5.27276	5.6301	8.03047
MSTRG.10919.1	0	0	0	0	0	0	0	0	0	2.49062	5.34239	2.864	1.7109	1.74494	1.29991	2.19395	0.045151	1.15444	0.047885	3.55085	1.36499	1.8457	2.33756	4.374	7.4131	4.8552	6.26478	9.11468	6.19251	4.91793	0	0	0.37658	1.50228	1.21323	1.40436	2.32439	2.22778	1.45371	2.31212	1.87293	1.52648
MSTRG.10928.1	1.41426	2.16049	1.43577	7.79844	10.1772	11.7049	8.41129	3.93742	5.6132	2.38809	5.35822	0.962189	1.06758	2.45394	1.32533	1.3165	0.810287	1.90826	0.582498	2.04067	0.901621	0.999146	1.89707	2.86964	6.87685	6.74795	3.27842	5.94639	6.80765	5.02481	0.675811	0.734788	0.613866	4.65293	5.699	3.30686	1.46488	2.37394	3.15994	1.11808	1.2676	2.72756
MSTRG.10944.2	0.966655	1.02686	0.580656	2.4774	6.16684	6.20505	3.64619	2.54561	2.73783	1.52544	3.13529	1.2462	1.4596	1.24144	0	1.78824	0	0.89931	1.1798	1.69586	0.834628	1.70894	0	2.09969	0.204708	5.75218	4.52563	0.340427	1.0252	2.15346	0	0.852009	0.006733	0.433482	1.37299	4.45127	0.999095	0.021025	4.03054	1.93468	2.8167	0.083839
MSTRG.10944.3	0	0	0	0	0	0	0	0	0	0.064526	0.032765	0.041143	0	0	1.59677	0	0	0	0.038089	0.115765	0	0.023363	1.92978	0	6.91089	2.94684	0	6.15918	2.09787	4.45496	0.620247	0	0.881942	7.01276	3.40095	0.154501	2.59102	3.82249	1.06494	0.243726	0.019079	2.98265
MSTRG.10945.2	0	15.0207	0	10.0542	14.7792	24.3297	3.24556	0	3.95756	2.8047	8.32457	2.03544	2.13088	3.52541	5.22714	3.49156	4.75197	2.52364	2.79145	5.24065	1.72884	4.25209	6.73557	9.00708	18.2	15.6619	22.298	15.9519	12.1365	17.675	0.569669	0.47269	1.36894	6.98014	6.82332	8.35712	3.05663	5.04506	6.79373	2.10655	3.50405	6.23382
MSTRG.10946.1	0	0	0	0	0	0	0	0	0	0	0	0	0	0	0	0	0	0	0	0	0	0	0	0	0	0	0	0	0	0	0	0	0.687666	0	0	0	5.30452	0	0	1.5516	1.65451	0
MSTRG.10948.2	0	0	1.35081	0	0	3.99844	0	1.05896	0	1.42022	3.53474	0	1.81494	0	2.08759	0	0	1.23975	1.71597	0	0	1.62763	0	2.94603	5.42358	0	0	2.23173	4.6024	4.22044	1.32522	1.14246	1.37413	3.74945	3.16803	7.28194	3.68391	2.86515	4.59319	0	1.20274	0
MSTRG.10948.3	1.47527	1.89572	1.67349	6.43781	5.42378	5.26327	4.58104	4.92691	3.78715	5.50348	5.53645	5.41337	2.55369	6.95665	3.20867	4.84992	3.82104	2.19614	2.35993	3.10822	4.68674	2.07173	3.6638	4.46342	7.85541	11.7867	14.5209	6.68235	4.51669	7.80558	1.83395	1.13609	1.53595	2.81861	2.96304	1.75286	4.07674	3.63661	3.7577	8.28369	7.21453	7.55109
MSTRG.10950.2	1.18962	3.32289	2.09933	10.1469	9.22777	10.0249	5.86776	5.08081	4.49686	3.93868	8.89445	3.23056	4.05565	4.21525	4.7827	3.11282	5.09645	3.96234	4.28962	4.55569	4.7686	5.36672	6.75656	9.42846	14.606	11.1988	14.9988	12.1934	12.4712	14.3372	2.25647	1.97426	1.83278	10.0801	10.664	9.83803	7.52726	7.03185	8.22282	5.48106	4.61334	6.15037
MSTRG.10961.6	0	4.24869	0	0	0	0	0	0	0	1.28388	1.48091	1.52872	0.334605	0.711013	1.18127	0.764599	1.18151	0.185838	1.00665	2.36516	0.225939	1.71968	2.00352	1.07819	6.51585	5.27304	2.90938	4.50802	5.88708	5.44581	2.3697	0.732034	7.37879	24.9574	28.9297	24.1132	11.193	13.2698	18.9891	1.322	0	0
MSTRG.10965.1	0	0	0	0	0	0	0	0	0	0.088258	0.189925	0.651344	0.056415	0.047796	0.024321	0	0.052308	0	0	0.133709	0.036282	0.138282	0.102997	0.120019	0.283829	0.01737	0.077628	0.142483	0.149327	0.241691	0.19685	0	0	1.9196	1.19295	0.944747	0.325667	0.936641	0.285626	0.797631	1.26926	2.08212
MSTRG.10967.1	0	0	0	0	0	0	0	10.5747	0	0	0	0	0	0	0	0	0	0	0	0	0	0	1.69566	0	0	0	3.67539	0	0	0	2.2864	2.51784	0	7.93459	0.787275	13.3346	6.27086	0.651401	17.157	0	0.738412	0
MSTRG.10967.3	4.17787	6.0598	1.83207	14.9046	3.66495	3.96576	6.1692	3.05036	13.2859	2.00084	4.82748	2.08904	2.10777	2.5221	2.75614	2.57403	3.2984	1.85011	1.31113	3.08418	2.29672	2.03636	4.35819	5.87093	14.4119	15.2657	11.1198	12.439	7.51117	15.3605	1.61392	3.32316	2.69418	16.586	13.7058	19.0222	7.14447	10.7155	22.0481	4.73141	2.98708	3.70551
MSTRG.10972.1	0	23.6475	14.1556	15.6689	0	0	3.71876	0	4.75787	3.83091	8.23908	9.14495	10.0792	3.46727	5.37799	4.57449	4.33199	6.83016	10.8707	6.6241	4.97701	13.8723	7.72624	7.90661	0.347069	0	6.90739	0.176228	1.15146	1.96791	7.39039	13.3105	6.29098	0	0.113493	0.125608	0	0	0.827068	3.86837	6.1547	3.54293
MSTRG.10979.1	0.461938	0.272	0.22236	2.37495	2.05559	2.47895	1.15144	1.1605	0.882521	0.32366	2.29433	0.683917	0.715909	0.574358	0.785492	1.12241	0.489619	0.403946	0.256927	0.312287	0.545645	0.560908	0.01609	0.018144	3.23097	3.73326	2.58807	2.31738	0.127068	2.22851	0.333334	0.785659	0.535852	2.27317	2.58145	2.50543	0.77462	0.090175	0.795478	0.069002	1.64375	2.85649
MSTRG.10979.2	0	0	0	0	0	0	0	0	0	0.345783	0	0.469841	0.627577	0	0	0	0	0	0.378591	0.552774	0	0	1.13442	0.786403	2.31525	2.59964	0	2.00892	2.45321	2.77621	0.340959	0	0.148017	3.40098	1.98894	2.22967	1.02715	1.02837	1.22337	1.71447	0	0.527314
MSTRG.10981.6	4.08817	2.62055	1.90632	32.3276	3.10216	2.40638	2.90066	3.18671	1.47815	0.820344	1.73366	0.380421	0.844706	0.413141	0.381302	0.416029	1.04418	0.503026	1.13999	1.50196	0.733698	0.813012	2.00562	1.21679	3.49922	4.22211	4.27065	4.04155	3.60314	6.728	0.403864	0.900428	1.26939	3.62819	5.86674	5.98455	0.905151	1.79246	1.86522	1.02004	0.801605	2.37289
MSTRG.10985.6	0	4.62158	0	19.1828	68.9119	94.2621	25.8037	11.8723	9.15136	1.94447	1.92992	1.58098	2.02433	1.29657	2.86471	1.02807	3.63532	1.22214	1.17809	1.83439	0.599271	2.0974	3.3785	1.32332	13.7148	8.04533	5.84566	7.72334	3.36255	11.5558	0.774541	1.70134	1.67592	9.49146	12.7139	35.4071	2.3594	3.41232	2.04612	2.62299	0.819283	2.15414
MSTRG.10988.3	8.78495	18.3279	11.2112	18.4418	41.6121	43.585	25.5648	14.4952	18.5535	12.1905	25.7391	10.8821	10.52	9.81803	13.9004	11.7416	13.6119	9.59824	8.56642	16.9728	8.06616	11.3824	19.2522	18.6845	48.1325	37.2944	36.5672	43.6287	48.0336	40.5597	1.93996	1.75209	2.18151	11.8765	11.4502	8.00635	7.03463	8.68572	9.22714	5.22065	5.23649	7.09458
MSTRG.10988.4	0	3.09799	2.12528	6.37216	4.83766	4.55221	3.27047	1.05449	1.483	3.15435	5.6392	2.7736	2.06945	1.54795	2.61705	2.93173	3.53583	1.24431	2.02576	3.30357	1.68353	2.06095	4.31291	2.5856	10.8078	8.24736	6.92292	9.99245	8.59638	9.31901	0.571135	0.79984	0.995119	6.09699	5.1804	2.43389	2.80751	4.70547	4.69788	1.27841	1.23818	2.00631
MSTRG.10989.1	0.750545	0.650612	0.952418	7.73249	11.3166	13.8929	4.85145	1.85835	1.0028	0.560079	0.446345	0.291564	0.433557	0.176113	0.082102	0.654508	0.103266	0.124227	0.556124	0.264813	0.602326	0	0.346077	0.980129	0.723938	1.07563	0.599075	0.355543	0.660309	1.05911	0.051917	0.141504	0.019427	4.02069	0.184138	0.244417	0.331818	0.234262	0.207132	0.255115	0.585172	0.903305
MSTRG.10991.1	0	0	0	3.7446	3.10289	0	3.20959	1.543	2.38938	5.78222	6.9121	4.93907	5.94551	4.83334	6.50499	6.03401	7.01919	5.6865	2.69686	9.0151	5.43663	6.66669	9.07426	10.2931	24.0357	21.4185	18.3443	14.1076	19.3553	21.6173	4.76006	6.17548	5.93001	17.1478	19.3926	15.658	15.3692	15.4788	18.7247	6.90467	6.4852	8.79527
MSTRG.10991.3	11.9591	3.78712	4.50609	17.722	13.3562	13.6642	9.24699	5.52902	6.15932	4.55232	19.9502	4.40382	6.08695	6.23801	6.99667	6.07191	7.62104	9.75046	10.9926	9.67184	5.07584	8.12376	11.0621	10.9355	26.1486	16.027	21.6281	38.5957	23.7673	18.1365	1.33864	1.24002	2.01149	1.62284	2.44735	2.18252	2.18731	1.82687	2.39698	7.14064	5.3451	7.81675
MSTRG.10993.5	0	0	0	0	0	0	0	0	0	0.302996	1.69945	0.104795	0	0	0.706728	0	1.02207	0	0.074956	0.643451	0	0.40778	1.58713	0	2.57922	4.10564	3.02699	6.8804	1.5341	6.30478	0.323755	0.493959	0.154597	0.773796	5.89923	3.39156	1.63052	0.583562	0.531412	0	0	0
MSTRG.10994.6	0	0	0	0	0	0	0	0	0	0.006626	0	0	0	0	0	0	0	0	0	0	0	0	0.154109	0	0	0	0	0	0	0	0	0	0.216755	0.264837	0.460415	0.236169	0	0	0	0	0	0
MSTRG.10994.7	0	0	0	0	0.090289	0	0	0.24521	0	0.107287	0.343339	0.185192	0.12529	0.047858	0.070746	0.193334	0.154269	0.150995	0.090364	0.193215	0.095156	0.141224	0	0.143457	0.933535	1.03657	0.159824	1.74569	0.602795	0.804307	0.21048	0.158231	0.138475	1.11716	1.08458	0.318049	1.00741	0.462635	0.769797	0.242818	0.189585	0.382397
MSTRG.10997.2	5.87077	6.11557	5.70828	36.9423	30.8501	40.327	16.1709	0.623675	16.0705	4.69406	8.13184	5.15721	3.47484	3.88445	4.73995	3.58138	5.09766	4.41927	3.53961	8.48002	3.34854	3.79677	7.14189	7.58952	27.601	25.8899	13.5645	16.3034	25.0688	19.0977	1.19069	1.55357	1.70944	14.5555	12.8626	8.85938	5.41848	7.80946	4.84256	5.06682	3.06441	5.50573
MSTRG.1100.1	2.31054	0	1.46552	7.65185	10.7747	0	7.40895	6.00518	6.23877	2.51885	3.58541	2.39844	1.19802	1.80557	2.37784	1.94221	2.70053	1.55352	1.76534	1.60614	1.57525	1.87349	2.19362	2.96686	8.18237	10.9329	4.92061	6.6708	6.88549	9.00121	3.49234	3.64038	3.77424	12.448	10.0408	9.99476	7.01891	6.61236	8.56332	2.50878	2.15383	3.01926
MSTRG.1100.2	0	3.18917	0	0	0	6.43948	0	0	0	0.985233	2.67271	0.476451	1.31233	1.27215	1.90306	0.779381	1.1748	0.768671	0.715517	2.69319	0.927203	0.752268	2.17586	1.58147	7.41714	5.735	6.15934	2.66637	2.94337	6.0275	0.112207	0.298367	0.37321	1.15582	2.49873	1.10932	0.747017	0.649982	0.590996	3.20219	2.83101	4.57285
MSTRG.11003.1	4.74168	4.58406	5.71567	49.6428	38.4939	35.1223	25.7798	7.8965	12.3682	1.49345	3.42399	1.00333	0.436655	1.72155	1.63401	1.67886	3.38317	1.21762	1.25768	3.34379	1.01983	1.23801	3.55604	1.90007	8.64363	7.40704	5.51246	8.48392	7.07546	9.9138	0.487887	0.597976	0.96989	1.86425	5.62421	0.613173	2.24284	3.38547	0.683356	1.48767	1.14087	3.57068
MSTRG.11003.3	0	0.1495	0	1.27296	0	0	0.573445	0	0	1.37905	4.0962	1.25603	2.48146	1.16363	1.48692	1.54985	2.19108	1.53126	1.19272	2.54665	1.51786	2.59781	3.4559	3.62299	7.76905	11.6017	3.58119	7.12111	6.2953	8.50889	0.250735	0.175044	0.020905	11.5748	1.05006	5.99854	0.851954	2.81375	3.02563	0.834556	0.294982	2.00981
MSTRG.11003.4	0	0	0	0	0	0	0	0	0.223454	1.82428	6.12123	1.39903	0.095079	0.683595	0.933911	0.775252	1.97609	1.49058	0.666112	2.4828	0.836587	1.11258	1.44381	1.4749	17.0411	8.77778	15.8762	12.7462	14.6967	5.31684	2.05627	2.60416	2.55037	7.61025	7.51464	11.9689	6.50212	3.91765	4.89068	2.68359	1.13585	1.58577
MSTRG.11009.3	0	0	0	0	0	0	0	0	0	0	1.15643	0.267535	0.051826	0.433157	0.410523	0.525568	0.621399	0.335176	0	1.96759	0	0.800718	2.18622	0.635494	5.34471	13.098	2.37112	5.75337	4.75682	5.09432	0	0	0	6.72334	0.747888	3.22202	1.28494	0.946188	0.423768	0.721669	0	1.87283
MSTRG.11010.1	0	0	0	0	0	0	0	4.28632	0	0.434445	0.9752	0.613866	0	0.832117	0.287487	0.122451	0.39426	1.05532	0.34454	1.09286	0.54711	0.249332	2.11741	2.43032	20.8317	3.47863	11.4246	16.9366	2.62785	13.4872	0.173072	0.281593	0	3.4225	3.48196	1.26599	0.418624	0.176285	0.408798	0.732538	0	0.052193
MSTRG.11010.3	0	0	0	0	0	0	20.5255	0	0	1.04111	3.12771	0.186799	0.137088	0.625666	0.110736	0.03628	0.519289	0.540682	0.210581	1.12087	0.011705	0.323854	2.39425	1.11008	31.8489	4.96471	21.8384	38.1615	4.43657	21.3367	0.006524	0.104842	0.025136	2.05177	4.52612	0.99086	0.4508	0.809029	1.09352	0.135407	0.03932	0.557545
MSTRG.11011.1	0	0	0	0	0	0	0	0	0	1.64005	1.62734	0.470932	1.6895	1.60269	2.63872	0.655214	1.08099	2.47565	1.2811	1.90035	0.839155	1.25502	1.49589	2.94823	0.383394	4.7051	0	1.89409	9.74202	3.37475	0.774378	0.631131	0.114172	0	0	0.134336	1.01928	1.48666	2.35435	0.357838	0.370643	0.42615
MSTRG.11011.2	0.385499	0	0.570203	0.749105	2.95865	1.87178	2.78476	1.2173	0	0	1.34738	0.437472	0	0	0	0.60499	0.891173	0	0	1.72791	0.694285	1.02263	1.60911	0	4.74605	1.71561	5.71796	1.78262	0	3.1664	0	0	0.080897	2.00216	2.59052	0.543775	7.99726	5.50166	6.72804	0.327817	0.295567	0.401689
MSTRG.11011.3	0	1.02372	1.43559	2.06079	2.06059	3.31455	3.14297	1.38571	3.57231	1.14563	1.64593	1.18917	1.22655	1.16323	1.50897	0.968977	1.8269	0.67418	1.11207	3.13621	0.978753	1.64688	1.99133	1.62705	2.20249	4.17751	3.22576	2.39476	5.31412	4.05255	0.03196	0.031248	0.065805	0.669701	0.745617	0.379437	1.87051	2.62837	3.70523	1.40019	1.29599	0.81587
MSTRG.11011.5	0.340744	0.606933	1.00207	0.233811	1.39042	3.43204	0.472113	0	1.7476	0.87923	0.953123	1.28608	1.65315	0.799393	0.58227	1.09958	1.66471	0.303035	0.879906	2.02603	0.713173	0.506947	1.63832	1.34877	2.06606	4.28988	1.60095	1.84372	1.25539	2.71645	0.243209	0.260541	0.297847	2.86295	0.633266	0.176356	5.61765	3.3095	2.61133	1.33461	0.833488	1.29778
MSTRG.11016.2	19.9484	28.939	13.5834	53.4473	46.0594	61.2609	19.6241	4.56996	14.2127	3.48962	7.2621	7.16871	3.78859	2.79235	5.00502	5.00626	5.67463	4.1797	7.07356	8.32426	6.40376	8.53735	10.1491	5.10228	20.9447	22.5825	22.412	19.7497	21.8422	16.0787	0.792803	0.221172	1.02312	22.0013	17.4186	11.4968	7.75155	8.142	9.60095	4.20938	2.07418	5.44578
MSTRG.11018.2	28.3212	22.1068	7.65285	576.679	110.428	447.149	55.0326	78.4781	28.8695	5.54729	10.8472	9.9397	6.65627	3.0388	5.18623	2.87861	6.54458	1.74047	1.40401	6.71012	5.4596	8.8558	9.14791	23.5309	21.295	9.47701	17.5693	16.4746	10.7429	13.5418	1.82237	2.60435	12.353	10.5374	13.673	72.3699	20.9546	30.0222	34.0486	2.53765	2.67781	4.68556
MSTRG.11021.1	1.91961	2.14199	0.80299	11.045	9.6453	10.6315	5.45552	3.99951	4.18596	2.07678	4.95581	1.73747	1.58512	2.33021	1.82329	1.75454	1.28175	0.988891	0.970771	2.17573	1.9723	1.29589	1.70399	2.8256	8.1353	9.81292	7.74322	5.00185	5.58271	8.24704	0.551347	0.503525	0.938682	7.14242	6.84841	4.80569	2.6982	4.98824	6.47683	6.1748	5.1195	9.69528
MSTRG.11027.7	0.3009	0.415013	0.183077	2.719	3.58739	2.50337	1.98592	0.656343	1.10986	0.644738	1.74052	0	0.460355	0.5816	0.693543	0.445712	0.775675	0.429656	0.310225	0.894968	0.649806	0.42954	1.09137	1.07332	4.63968	4.71636	4.27524	4.44017	2.86056	5.36665	0.474058	0.380899	0.714554	5.79226	5.63076	6.80976	2.56259	2.38086	5.17363	1.38138	1.2267	3.24934
MSTRG.11029.1	0.617532	0.252686	0.324194	3.92297	3.29201	4.72429	1.95957	0.639716	1.28027	0.127181	0.670113	0.145419	0.068665	0.370854	0.370701	0.144862	0.758629	0.288808	0.115006	0.633052	0.210235	0.306622	0.405348	0.347037	1.82478	0.794316	0.539743	0.715142	0.999255	2.52436	0.280839	0.214948	0.095557	3.78753	2.52536	1.76596	0.837655	1.74327	0.828232	0.983536	0.543194	0.537391
MSTRG.11029.2	0	0	0	0	0	0	0	0	0	0.724697	0.543554	0.159069	0.433613	0	0.118384	0	0	0.020077	0.178373	0	0	0	0.411569	1.07697	2.83747	4.33373	2.96699	3.06109	2.25412	1.66073	0	0.178077	0.500618	2.60583	3.28904	2.79795	1.94002	1.17877	2.38963	0	0.45898	2.50952
MSTRG.11035.1	1.01045	0.555218	0	6.29989	7.31621	8.81583	0	2.63277	0	0.370623	0.804969	0.699842	0.424385	0.523529	0.654013	0.429557	0.726773	0.065273	0.247019	0.449492	0.055985	0.038174	0.79909	0.905106	2.92145	3.45424	3.39979	3.74418	1.8575	3.92386	0.048545	0	0.572317	2.12321	1.7879	3.54295	2.09411	2.19431	1.33196	0.567505	0.282577	1.05279
MSTRG.11035.2	0	0	0	0	0	0	4.22686	0	3.57949	0.819164	1.99712	0.061733	0.627827	0.639029	0.622543	0.478523	0.816877	0.62956	0.62509	0.920832	0.636851	0.808291	0.498205	0.866554	5.30518	4.35013	1.97235	1.74995	2.86512	2.59889	0.600898	0.589422	0.348642	6.75934	5.02703	2.91288	2.16245	1.15748	2.67336	0.993559	1.04915	2.52436
MSTRG.11039.1	0.878066	0.997111	0.446079	5.72897	6.03199	4.9439	2.89635	0	3.1437	0.112506	0.177134	0.18568	0.126888	0.111724	0.044352	0.118066	0.105545	0.048476	0.109583	0.315763	0.016112	0.319057	0.145012	0.13579	0.84125	1.21109	0.162477	1.23755	1.48133	0.609771	0	0	0.090013	3.85753	1.76144	0	1.69122	0.211205	1.40238	0.113681	0.25853	0.432114
MSTRG.11042.2	0.705381	0.939327	0.336305	5.55756	0	2.89642	3.01796	1.52428	2.33327	0.621993	0	0	0.570797	0.353921	0	0.468824	0	0.455887	0.297944	0.509341	0.435304	0	0.98828	0.633839	3.74593	3.68314	2.22406	2.49625	1.62468	0	0	0.167547	0.035055	6.78774	4.06949	3.10267	3.70583	0.160797	0.197883	2.15238	0.62433	1.8708
MSTRG.11042.3	0	0	0	0	6.01475	0	0	0	0	0.407853	2.43428	0.605558	0	0.477197	0.770932	0	0.925211	0	0	0.474335	0.085607	0.545977	0.006857	0.788952	1.84436	4.47367	2.41577	0.870658	0	5.5555	0.380116	0.382104	0.810711	2.45979	1.31437	0.893933	1.11152	2.6728	4.39318	0.051246	1.50445	2.2667
MSTRG.11043.1	1.2077	0.987115	0.607049	8.32301	8.13491	7.96899	3.91608	2.05535	2.79459	0.997765	2.53486	0.522192	0.491402	0.653488	0.902512	0.274353	0.834789	0.730991	0.252277	0.904544	0.496292	0.804567	1.36528	1.47091	6.87709	8.6813	4.97374	6.41596	5.06648	5.87625	0.244027	0.525744	0.180598	9.66851	9.11022	2.22569	2.95908	1.73368	5.68186	1.87497	1.00011	4.59868
MSTRG.11048.1	0	0	0	0.318564	0	0	0	0	0	0.285708	0.538781	0	0	0.084317	0.43702	0	0.568597	0	0	0.567472	0	0.243962	0.282817	0	2.05771	1.86055	0.349943	0.850049	1.0317	0.416092	0	0.104708	0.332026	1.60709	0.658053	1.89575	0.564343	0	2.25122	0	0.192772	0
MSTRG.11048.4	0.048812	0.071531	0.06557	0.379043	0.660082	0.541367	0.499365	0.14149	0.459374	0.244955	0.80574	0.22717	0.222582	0.1887	0.224156	0.324667	0.09745	0.152231	0.111173	0.401243	0.097889	0.108585	0.320675	0.270148	1.83584	2.16472	0.818771	1.37813	1.04403	1.6753	0.110487	0.212303	0.293295	2.86058	3.63163	2.74926	1.4464	0.920211	1.44244	1.18253	0.727786	1.56013
MSTRG.11050.1	2.65232	2.55393	2.51964	23.0275	14.2624	14.1489	12.0199	7.72871	7.37526	2.94815	4.08874	4.90272	3.27277	2.73867	3.47636	1.69448	4.70935	3.46541	1.6091	5.22954	1.02879	1.95459	5.78751	4.49715	6.87997	7.32246	5.63083	8.66728	11.4985	9.22607	0.69207	0.593613	0.363387	3.5016	3.14302	3.71251	1.8155	2.26567	2.82016	2.59838	2.82236	1.37115
MSTRG.11052.2	0	0	0	0	0	0	0	0	0	0	0	0	0.989541	0	0	0	0	0	0	0	0	0	0	0	0	0	0	0	0.129298	0	0	0	0	4.73518	0	0	0	0	0	0	0	0
MSTRG.11053.1	93.0469	76.5252	80.6777	188.993	112.374	235.832	183.725	31.4358	114.057	84.6364	158.395	78.9948	71.413	85.9925	83.394	85.2543	85.1552	65.0384	75.7519	105.826	68.292	80.6574	127.817	136.089	273.222	202.94	243.727	181.519	218.863	204.669	69.5909	79.9759	59.5648	110.718	114.572	73.2614	112.786	126.491	133.605	77.914	67.1868	75.5283
MSTRG.11056.1	0	0	0	0	0	0	0	0	0	0	0	0	0	0	0	0	0	0	0	0	0	0	0.00108	0	0	0.026206	0	0	0	0	0.161721	0	0	0	0.001288	0	0	0	0	0	0	0
MSTRG.11057.2	0	0	0	0	0	0	0	0	0	0.137388	2.60794	0.92228	1.72698	0.553355	0	0.710721	0	1.16525	0.632381	0.781919	1.09801	0.524281	3.94105	3.81218	8.39358	5.82055	1.86227	4.94984	11.7657	5.46276	1.02837	0.491423	2.03598	2.50415	4.82824	5.4188	3.20279	2.81709	7.10347	0	0	0.583735
MSTRG.1106.1	1.184	1.02699	0.412276	1.71434	2.55748	4.85201	4.28745	3.14269	6.30504	2.03806	7.37016	1.57001	3.6276	1.24727	4.65101	2.1687	3.55084	2.22877	1.64745	4.78841	0.615929	1.52773	3.4363	3.57041	8.166	9.72934	6.28638	6.58554	4.36571	8.0664	2.78038	2.46235	3.56589	10.3704	6.98628	8.59034	4.32709	4.22499	2.98672	2.94611	2.38621	2.73541
MSTRG.11062.3	0	0	0	0	0	0	0	0	0	0	0	0	2.03092	0	0	0	0	0	0	0	0	0	0	0	0	0	0	92.1999	0	0	0	0	0	0	0	0	0	16.0244	0	0	0	0
MSTRG.11063.4	0	0	0	0	0	0	0	0	0	0	0	0	0	0	0	0	0	0	0	0	0	0	0	0	0	0	0	0	0	0	0	0	0	0	18.5692	0	0	0	0	0	0	0
MSTRG.11063.5	0	0	0	0	0	0	0	0	0	0	0	0	0	0	0	0	0	0	0	0	0	0	0	0	0	0	0	0	0	0	0	0	0	0	0	0	0	0	9.49624	0	0	0
MSTRG.11064.1	0	0.011594	0.088702	0.066548	0.054174	0.036093	0.093728	0.160801	0.019162	0.433743	0.581772	0.370096	0.428223	0.222717	0.277525	0.283844	0.552317	0.266684	0.346502	0.349751	0.492279	0.517917	0.463297	0.548096	1.41776	2.87614	0.849078	1.25066	1.12691	2.03417	0.288164	0.420707	0.587174	2.59374	3.03608	3.07586	0.897436	1.80978	1.29226	3.75775	3.16234	5.15231
MSTRG.11066.1	0	0.09846	0.183607	0.392042	1.04883	0.685444	1.50504	0.720004	0.801913	1.07835	2.16235	0.742578	0.856235	0.763572	1.07356	0.350669	1.54897	0.903086	1.01328	2.78963	0.374875	0.783714	1.7081	1.48495	3.35455	4.10011	1.73911	3.32803	1.12347	2.94268	0.189342	0.284018	0.28604	1.91976	1.26121	0.284158	7.06233	9.12312	5.20883	1.09763	0.486253	0.162223
MSTRG.11066.2	0	0	0	0	0	0	0	0	0	0	0	0	0.213096	0	0	0	0	0	0	0	0.650998	0.501524	0	0.364798	0	0.620769	0	0	1.11633	0	0	0	0	0	0	0	4.30022	0.226669	0.928954	0	0	0.632647
MSTRG.1107.4	0	0	0	0	0	0	0	0	0	0	0	0	0	0	0	0	0	0	0	0	0.547673	0	2.56091	0	8.86443	0	0	6.43348	0	0	0	0	7.37802	0	23.9546	0	0	0	26.4568	0	0	0
MSTRG.1107.5	0	0.117557	0	0	0	0	0	0	0	0	0.128636	0.069456	0.056868	0.021128	0.102306	0	0.237652	0.052252	0	0.238694	0.39701	0.076582	0.345317	0.885223	0.287395	0.608886	0.601835	1.01229	0.278126	0.626697	0.376338	0.511389	0.284479	1.18082	3.718	1.9681	6.48877	2.81344	2.99037	0.614045	0.323487	0.308633
MSTRG.11071.1	20.5426	17.5561	13.4095	43.8966	134.93	124.543	35.101	27.2796	30.4395	8.40624	18.623	6.1958	8.88011	7.95042	10.415	5.81524	12.5617	8.17306	8.28214	15.3867	8.49526	8.68937	16.7426	16.3892	48.5575	46.0875	36.5013	36.6373	40.3368	43.8558	2.03613	2.47673	2.98172	15.5012	13.2261	12.4282	6.41306	9.35148	9.40536	6.39095	5.71924	8.10993
MSTRG.11071.2	10.4446	17.5844	12.7432	78.6007	41.848	44.0874	47.5313	28.1602	36.1821	7.58293	15.714	6.2644	6.57672	6.22039	9.76708	5.17039	10.0322	5.21861	6.30196	11.3282	6.47474	7.23747	11.3485	14.3794	36.1001	38.1057	24.6932	28.3719	27.7132	34.8505	1.46076	2.00821	2.59543	12.4505	12.7269	9.87197	4.71774	8.05867	8.12782	6.05453	4.75789	8.7194
MSTRG.11071.3	0	0	2.44889	0	0	0	0	0	0	2.19427	7.45737	2.08921	3.29407	2.12459	3.26475	0.818955	4.42518	2.63097	2.52782	4.7515	3.15857	2.7013	5.26384	4.96031	17.5117	9.47665	12.2601	11.104	15.651	10.586	0.929777	2.22861	1.73683	4.15279	2.79554	4.33319	1.98372	3.91537	3.11049	0.264141	0.518	0.501874
MSTRG.11075.3	6.42733	8.6702	3.61434	31.4338	24.4975	18.8151	7.52742	0	10.2579	2.93535	8.56582	2.50218	3.29379	2.77473	3.45019	3.3674	3.29497	2.60466	2.45529	4.24567	1.29788	2.8217	7.50974	4.44685	12.5268	11.2659	7.91252	9.63536	14.639	11.3639	1.33607	1.0488	2.44213	8.26257	6.58743	9.84311	2.16625	4.6473	6.28391	2.86254	1.91037	3.17009
MSTRG.11077.1	2.33222	3.08136	2.73672	9.9519	11.3788	11.0796	5.93051	4.42973	5.63269	3.07053	6.8946	2.37969	3.24066	2.9492	3.06643	3.03615	4.26181	2.57776	2.67005	5.44685	3.11408	4.24757	6.55006	4.9642	14.343	12.2481	10.0262	10.1703	12.8744	13.0592	0.588188	0.301734	1.15822	4.80301	3.77286	3.21356	3.05589	3.51379	4.82982	2.03287	1.3479	2.64095
MSTRG.11077.3	0	0	0	0	0	0	0	0	0	0	0	0	0	0	0	0	0	0	0	0	0	0	0	1.42441	1.83691	1.80507	0	0	0	0	0	2.54631	0	0	0	0	0	0	0	0	0	1.75337
MSTRG.1108.1	0.539631	0.740468	0.694858	2.24478	2.70908	2.68953	2.08543	1.06529	1.70975	1.98489	4.2601	2.87642	1.96973	2.14668	2.36125	1.84323	2.13525	1.29183	1.54696	2.25719	1.25638	1.82421	2.41119	3.29589	8.03905	10.5936	6.56003	5.34998	5.96858	7.94593	0.694129	0.616646	0.708574	6.81493	3.77004	2.48126	2.48032	1.93602	1.75339	2.55241	2.31034	3.5453
MSTRG.11080.1	0	0	0	0	0	0	8.47039	0	30.0459	3.19679	19.9217	1.907	3.93944	3.78182	3.1464	7.34869	3.179	3.72318	5.44913	4.01557	3.21811	3.15313	4.19931	5.52365	22.4431	10.4644	17.0694	21.6778	47.1831	9.82567	0.862958	0	2.04918	8.49657	6.12295	6.41414	5.92914	4.6682	5.4179	3.89428	1.77504	2.78349
MSTRG.11080.2	0	0	0	0	0	0	0	0	0	13.1853	8.74903	15.7676	19.9429	15.7718	23.4111	5.87943	15.0824	13.9578	7.23275	23.3825	12.3206	13.7476	23.916	29.459	26.8777	26.0572	29.7467	29.3066	15.1492	40.7423	0.708327	1.39783	0.383579	0.971036	2.4228	3.0472	2.82854	9.09115	4.61732	2.56189	3.72005	3.45974
MSTRG.11081.1	5.65821	5.48116	4.39175	17.483	5.50213	75.5028	17.0447	0	14.004	0.360141	4.51793	0.411919	1.20517	0.422231	0.306803	0.250487	1.61065	0.510129	0.725452	2.46812	0.600373	1.14378	6.18837	1.69523	16.3391	29.3566	11.4237	12.5781	11.0163	7.07346	0.871833	0.44046	0.33295	9.66204	4.63228	2.53377	0.788476	1.87964	1.59275	3.4092	0.887752	4.8059
MSTRG.11082.3	3.51766	3.90423	4.01404	16.9918	13.1134	15.1936	9.67699	5.68985	5.86048	6.01818	11.8136	4.59179	5.31817	5.15715	6.70963	5.76909	6.90112	4.77342	3.92146	8.4765	4.39429	5.31108	9.83471	9.06559	25.335	16.9596	18.0907	24.2982	23.9593	19.2481	0.676154	0.977584	1.19066	5.89667	6.33205	8.28163	2.98553	3.65873	4.68357	2.15992	2.17529	3.37913
MSTRG.11083.1	0.899498	6.12017	0.598521	19.3336	10.7223	12.0367	5.25742	3.80128	5.50327	0.328646	0.445584	0.137652	0.135862	0.269835	0.347177	0.248937	0.230962	0.146742	0.065473	0.16337	0.216593	0.167482	0.251777	0.420699	0.611683	0.376492	0.448583	0.400128	2.76692	0.430682	1.49794	1.608	0.430877	2.71075	2.32845	1.10155	0.874905	1.26941	1.43476	0.971702	0.349927	0.581967
MSTRG.11085.1	17.7193	121.8	38.3997	203.164	152.753	441.422	53.4717	47.0457	42.7309	15.358	26.3997	6.94664	13.9297	12.0619	11.6416	11.0528	17.6828	9.95599	7.30047	20.5969	12.4608	14.4728	22.4426	29.1381	73.0716	67.3256	55.631	57.9705	50.9007	56.3091	7.32314	13.8321	7.75559	25.0462	32.2985	20.9524	43.5406	33.9515	48.2764	14.8888	5.67156	14.0092
MSTRG.11086.3	7.40455	9.79324	12.3547	42.2787	34.8634	36.249	28.1566	18.3953	17.8837	21.276	35.5465	23.116	18.8671	17.9335	22.6157	22.4611	22.4413	16.7439	12.7894	19.2244	19.2759	21.2722	33.6783	42.4371	33.1256	43.6124	45.6117	56.5278	56.9932	46.399	4.09279	3.06198	5.46168	17.4578	16.7379	14.9349	8.6554	12.0391	14.5789	9.4954	8.26313	8.58068
MSTRG.11087.3	0	0	0	0	0	0	0	0	0	0	0	0	0	0.369698	0	0	0.579158	0.445582	0.168242	0.659421	0	0	1.34013	0.584543	2.48077	0	2.08221	3.47543	2.97823	1.40955	0.470772	1.04004	1.63912	1.37527	7.49556	3.86537	4.98858	1.33537	5.22194	0	0	0.770215
MSTRG.11087.4	8.54043	10.061	1.76524	15.6057	2.9522	6.44411	2.48542	14.004	18.1096	1.44254	5.68412	1.7573	1.78212	0.639158	6.24465	2.05057	5.49027	4.41053	1.99935	2.45878	2.36132	2.20203	1.95391	2.66106	6.99689	10.0184	9.46311	12.6911	6.81284	5.24001	0.501719	0.896645	2.40542	3.69239	5.59053	2.75502	3.29612	3.30126	3.6456	1.20647	3.63118	1.22605
MSTRG.1109.3	0	0	0	0	0	0	0	0	0	0	0	0	0	0	0	0	0	0	0	0	0	0	0	0	0	0	0	0	0	0	0	0	12.4299	0	0	0	0	0	0	0	0	0
MSTRG.11090.4	23.0904	42.002	7.65039	190.524	129.792	121.125	78.4136	56.1135	55.1455	2.54271	9.41142	2.18753	3.13229	2.41045	4.21201	2.83465	5.70194	2.31113	1.76909	3.96554	3.02278	7.73632	4.64647	5.56551	9.92486	6.95947	20.4741	9.14606	12.7549	8.83195	1.88076	2.72751	2.25786	13.2525	9.41719	21.0395	17.4198	7.40195	29.608	2.22785	1.46858	2.18819
MSTRG.11090.5	0	0	0	0	0	0	0	0	0	0	0	0	0	0	0	0	0	0	0	0	0	0	0	0	0.279759	0	16.3708	0.063897	0	0	0	0	0	0	19.8339	0	0	0	0	0	0	0
MSTRG.11097.13	0	0	0	0	0	0	0	0	0	3.01863	0.158828	0.428062	0	2.40139	9.87274	0.036611	4.09691	0.206735	0.023068	9.73649	0	0	2.48511	0.027902	6.45856	0.81103	8.46662	27.0669	17.512	14.306	0.476084	0.588049	0.174548	3.04896	1.52096	0.743331	9.51737	3.76993	18.9082	0.442387	0	0.34409
MSTRG.11097.14	0	0	0	0	0	0	0	0	0	0	3.74092	0	0	0	0	0	0	0	0	0	0	0	0	0	0	6.58172	0	0	0	0	0	1.89716	0	0	13.5598	21.0283	6.95986	0	14.5548	0	0	0
MSTRG.11097.6	0	0	0	0	0	0	0	0	0	0.351681	0.812961	0.231694	0.212297	0.378948	0.693565	0.088812	0.214187	0.13714	0.152624	0.677583	0.118404	0.160764	0.489634	0.629703	0.966019	2.08856	2.01716	0.81064	1.07779	1.23591	0.327597	0.408111	0.278756	0.555411	2.33848	2.77843	0.714785	1.21851	0.452488	0.310006	0.249997	0.250899
MSTRG.11097.8	5.90963	13.4311	11.0878	38.9285	30.0425	27.8461	24.2978	12.6017	16.221	6.9393	16.4296	8.58309	9.70329	6.39223	5.39839	8.47773	5.65742	7.15511	5.03848	5.83718	5.81388	7.21706	13.083	13.7475	27.972	18.2374	20.5427	14.5315	24.0974	17.8487	3.42034	4.13916	6.87482	14.9793	8.1156	7.48295	1.32956	12.5061	3.26102	7.25195	5.40892	7.75956
MSTRG.11098.1	0.554974	1.06259	0.737018	2.56196	1.91836	1.82989	1.81722	1.26121	2.40543	1.79255	2.55376	1.79404	1.57089	1.98166	1.99326	1.35926	1.39871	1.22874	1.17678	2.26729	1.16449	1.36378	1.88199	2.54709	3.7216	3.0845	3.27378	3.53048	4.61883	3.49801	1.2658	1.88433	1.89284	2.70885	2.84591	2.52623	1.91145	3.67359	6.70679	2.42573	1.89614	1.95805
MSTRG.11103.1	0	0	0	0	0	0	0	0	0	2.90921	6.98824	0	0	0	5.67332	0	3.66445	2.92104	0	0	4.02276	5.83362	0	6.13443	0	0	0	14.8222	22.2541	0	2.86368	3.00646	3.66257	0.581089	16.0426	24.9096	12.3319	16.627	10.3041	3.77557	3.04401	6.64194
MSTRG.11105.3	0	0	0	0	59.352	59.2559	0	0	0	0.454511	3.55712	1.04482	1.85779	1.07509	2.50586	1.15033	3.05545	1.34245	1.82933	7.27462	1.15296	1.76168	4.401	5.41834	16.5548	12.9177	10.6823	78.3703	10.4248	8.31235	0.593191	0.939376	0.177197	2.21909	18.692	20.7972	1.56113	2.31415	13.1886	2.99717	0.561304	0.48763
MSTRG.11106.2	20.4579	4.22356	0	137.987	125.55	27.5823	138.293	66.6904	166.158	29.0467	47.5575	16.6695	30.9015	19.2753	24.2806	20.5844	57.3339	27.3156	9.5011	61.3846	10.2704	20.8885	45.2277	55.3749	158.467	139.451	73.3448	101.686	79.8059	117.574	7.85617	8.00129	12.3109	90.2365	79.1418	124.511	11.4649	18.1942	14.7269	19.2081	17.9585	64.9081
MSTRG.11108.5	2.09693	3.27976	2.46458	20.2579	17.4078	17.3215	9.48478	5.0176	7.36706	0.550069	2.51389	1.09557	1.02327	0.884223	1.59501	0.793872	1.90509	0.404437	0.536446	1.6946	0.801055	1.11569	2.85142	0.958918	10.6322	3.56471	5.90973	5.54361	5.00972	4.63486	0.420354	0.550006	0.617004	8.78247	0.000605	2.58987	2.5909	1.82156	3.041	1.38345	0.634055	2.21826
MSTRG.1111.1	24.6991	29.9238	15.3042	56.7299	145.181	132.27	76.7608	39.4844	49.8247	20.7008	46.61	21.7627	13.7423	21.6195	25.5609	20.0874	17.7803	9.15158	12.3906	20.1869	14.8721	15.637	17.8701	29.8513	101.072	92.209	63.0186	66.1232	58.0792	78.3123	12.2485	20.6207	21.0686	96.4475	101.356	69.7563	42.9842	44.9964	75.1682	38.9774	34.8082	56.7823
MSTRG.1111.3	0	0	0	0	0	4.30452	0	0	0	11.616	21.1653	4.47803	10.6463	12.2917	10.0971	8.25908	12.2625	6.46414	11.1766	19.0597	8.5207	10.5955	17.501	16.6449	69.1588	73.7803	46.7361	33.8499	52.3069	72.5858	12.5147	17.4403	16.5193	60.2934	45.7822	48.0453	29.9384	42.6578	34.3183	11.3913	8.46715	18.5407
MSTRG.1111.4	0	0	0	85.8351	2.00404	0	0.771544	0.811259	0.476717	5.32315	7.41806	4.78754	3.23657	2.98933	4.79198	3.7968	4.91283	7.97275	2.26756	3.34013	3.03077	3.3744	6.56439	11.7836	40.4094	27.9997	31.797	27.3753	26.4134	22.597	0.521492	0.71266	0.720934	30.845	6.63774	8.04612	9.44004	16.9241	14.2653	2.31555	2.76034	5.00875
MSTRG.11111.1	2.36021	5.3188	3.2006	15.8999	11.5063	15.1819	11.3417	9.67892	7.81446	6.42214	10.8619	3.50679	6.37754	4.72597	5.4458	4.5013	9.56721	5.3731	4.33815	11.5735	4.44016	6.1629	10.1914	8.41519	25.1264	27.8256	19.1757	33.1534	21.2182	27.5298	1.18505	1.38391	1.63103	13.064	13.0217	11.2474	9.2505	9.8801	20.9725	3.53107	2.74212	6.75887
MSTRG.11113.2	0	0	0	0	0	0	0	0	0	0.67858	0.776208	0.055277	0.48723	0.319366	0.598247	0.058296	0.489179	0.446473	0.51952	0.481414	0.417632	1.0356	0.96454	0.89395	4.38371	1.27985	2.04856	2.68831	1.82636	1.16621	1.3088	2.70532	2.72829	1.05079	6.37807	5.46952	2.53313	1.44969	1.43816	1.75493	0.474732	0.256006
MSTRG.11115.1	0	0	0	0	0	0	0	0	0	0	0	0	0	0	0	0	0	0	0	0	0	0	0	0	0	0	0	0	0	0	0	0	0	4.14565	0	0	0	0	0	0	0	0
MSTRG.1112.5	0.823278	0.625351	0.370039	10.9299	5.42326	8.18291	6.11794	2.08312	1.81969	0.775237	3.04834	0.375924	0.964188	0.431069	0.731408	0.456572	0.967416	0.819077	0.579773	0.918206	0.205033	0.669627	0.733357	1.38251	7.22872	7.01205	2.65043	4.55134	3.73603	4.71173	0.239481	0.304165	0.939401	9.74444	6.77531	3.99021	0.702192	4.22147	2.48267	2.2581	1.22952	6.56628
MSTRG.11127.1	2.69759	2.53608	2.6037	11.6433	10.3683	10.8619	8.27787	4.0178	6.00881	1.39318	4.72412	1.8784	1.07433	2.51753	1.47877	2.26426	1.9088	1.046	1.68564	1.20502	1.55313	1.84717	3.3812	3.38845	3.35176	4.75857	4.80257	7.17392	3.46684	3.63595	1.46932	0.397917	0.721105	3.30518	2.49104	3.5136	1.99798	2.31975	3.76703	1.787	0.169316	0.215173
MSTRG.11129.1	2.71193	2.2217	0.47237	10.6899	13.0894	18.9586	3.78617	11.8856	1.29318	1.952	9.01059	1.94923	1.96001	3.13189	4.74186	1.78057	2.18606	5.06169	1.7559	1.95801	1.47548	3.94148	2.97662	2.4786	12.602	10.3828	8.80745	18.4725	11.9218	6.86038	0.479758	0.63334	1.19957	3.93122	12.9834	3.94682	0.930199	1.66733	7.07417	1.68883	1.6515	2.66511
MSTRG.11129.10	0	0	0	0	0	2.37017	0	0	0	0.714436	5.66177	0.658399	0.833752	0.528617	2.63482	0.666086	0.519203	1.85375	0.695015	1.11421	0.479502	2.04446	1.12918	1.06531	4.93272	3.4043	1.94461	3.5473	8.68868	2.41228	0.314774	0.311654	0.462256	1.94408	8.2683	1.63004	0.720828	1.05326	5.01371	0.506899	0.465272	1.3866
MSTRG.11129.11	0	0.634216	0.079891	6.19899	10.9418	4.86183	4.05556	2.79157	0.522798	4.73168	21.5896	3.30593	3.24608	1.56824	4.56232	3.12978	5.75198	5.79333	2.95614	6.19723	2.69988	10.0833	6.72389	8.92873	49.1779	33.3408	18.2526	25.1154	52.6892	31.5146	0.357647	0.213997	0.734915	2.02715	8.53785	2.25085	0.493967	0.682398	1.59978	2.91659	1.79346	3.32185
MSTRG.11129.13	0	0	0	0	0	0	0	0	0	1.86112	1.3654	1.76419	1.3727	1.40934	1.48492	1.81885	0	1.07384	2.18233	3.6384	1.26271	1.44017	2.98749	6.9668	5.80814	20.967	2.32795	8.49995	6.7856	12.9277	0.57947	0.492184	0.156367	0.369928	5.25656	1.92916	1.39487	1.34598	4.24092	0.126609	0.03873	1.54995
MSTRG.11129.2	2.78525	1.97769	1.43942	12.3246	16.6423	14.8186	6.9356	7.51366	1.92209	3.58546	10.4023	3.2633	3.99336	3.40769	5.01167	1.90465	4.79939	3.81516	3.52079	4.042	2.5907	4.44424	4.35469	8.55493	35.4821	26.8631	7.69996	13.4674	16.1967	19.6035	0.442407	0.141973	0.924807	6.34028	5.10942	1.87692	0.853905	1.04779	3.68056	1.17589	0.667127	2.72161
MSTRG.11129.3	0	0	0	5.38613	0	0	0	0	0	0.370483	1.62414	0.1673	0.38804	0.482728	2.25626	0.261199	0.350366	1.2533	0.408142	0.312211	0.201737	1.19136	0.485916	1.07651	2.02368	2.02928	0.949813	1.22107	3.34131	1.29827	0.389846	0.081179	0.209633	1.50153	1.50899	0.557861	0.208109	0.518581	2.11277	0.184424	0.328771	0.744908
MSTRG.11129.4	0	1.63513	0.825733	10.4136	11.8961	6.56756	0	7.03016	1.51384	0.471232	1.22583	0.837936	0.660458	2.22469	0	2.1615	0.618144	0.017275	1.3797	0.692177	0.94054	2.17993	0.55868	1.74556	6.4512	4.94507	5.87145	4.77658	1.9404	4.1182	0	0.191669	0	0.293135	2.52441	0.390895	0.49312	0.047104	1.36056	1.03663	0.197253	1.90905
MSTRG.11129.5	1.86999	2.48282	0.210727	1.03999	15.8567	20.1541	0.510525	4.52924	1.05353	1.34532	2.88736	0.448665	1.00415	0.114802	1.3674	1.04086	1.33691	1.67046	0.432577	1.74975	0.559945	1.17703	4.14763	1.80187	6.3727	8.34465	3.08446	9.06858	4.0128	4.4693	0.052406	0.123206	0.427506	0.467677	2.24057	0.185367	0.393341	0.254303	0.729653	0.846928	1.5672	1.08691
MSTRG.11129.6	0	0	0.120957	7.31161	0.529577	1.47024	18.4921	0	0	2.70312	1.22283	0.516602	1.5491	1.45662	1.63258	0	2.05109	1.97582	1.87884	3.21963	0.69306	2.37962	1.61536	3.04207	16.051	16.485	15.1937	22.4483	15.1387	11.9798	0.51543	0	0	1.93496	4.20172	3.13294	0	0.982999	1.78707	0	0	1.24452
MSTRG.11129.9	0	0	0	0.512292	0	0	0	0	0	0.006395	0.001906	0	0.00306	0	0	0.019572	0.000213	0.013779	0.015823	0.057691	0.089269	0.004961	0.318774	0	2.59777	1.41564	0.196028	0.75513	0.009124	1.72793	0	0	0.102165	1.62026	3.56553	1.84039	0.013023	0.013396	2.38084	0.567	0.383187	2.02918
MSTRG.11130.1	0	0	0	0.968399	0	0.19069	0.758896	0	0.330262	0.216408	0.667395	0.192372	0.247778	0.169702	0.494581	0.105985	0.213921	0.302477	0.135793	0.337237	0.085507	0.448931	0.464751	0.464519	1.36921	1.84185	0.546549	1.25035	1.1776	2.11094	0.03817	0.04013	0.134446	0.198853	0.504876	0.181534	2.73151	0.968361	0.909617	0.365488	0.165308	0.510647
MSTRG.11131.1	0	0	0	0	0	0	0	0	0	0	0	0	0	0	0	0	0	0	0	0	0	0	0	0	0	0	0	0.056886	0	0	0	0	0	8.39868	0	0	13.8451	0	0	0	0	0
MSTRG.11131.2	0	0	0	0	0	0	0	0	0	0.484626	2.35031	0.523385	0.396289	0.555132	1.39948	0.792042	0.534507	0.824985	0.399961	2.32919	0.616652	1.2255	1.49772	0.940312	4.42727	3.26621	1.88402	4.92509	5.04802	2.97474	1.07601	5.55535	1.58448	8.25407	6.54978	3.37706	4.55828	7.20291	7.36024	1.11947	0.197232	0.499494
MSTRG.11131.3	7.75243	3.54164	2.30065	43.6994	47.2935	45.505	27.4545	22.3043	5.39677	21.898	185.84	17.999	40.4052	42.893	83.0777	16.1639	35.319	97.3097	24.7912	85.1511	26.8476	82.0337	57.9401	70.63	101.36	118.462	98.9464	86.9702	161.451	123.012	6.41344	15.7374	10.4096	24.5129	54.4423	23.8393	37.743	29.0645	144.913	24.9899	20.151	20.7139
MSTRG.11131.4	1.84265	1.00578	0.124638	12.1089	13.861	14.3973	4.05231	3.66537	1.8839	1.80001	4.43457	0.913937	1.4845	2.00973	1.71384	0.932737	3.24512	2.20508	0.829123	2.19273	1.40072	2.32545	1.96715	3.7956	7.18667	8.71797	8.12375	5.04027	4.04934	10.449	0.342147	0.551953	0.664733	3.91242	4.25453	1.10003	5.58152	2.93988	3.30412	1.48988	1.13494	2.15739
MSTRG.11131.5	0	0	0	1.61616	0	0	1.13553	0	0	0	0.131033	0.038769	0.024626	0.006832	0.077124	0.075816	0.06694	0.066363	0.015694	0.124087	0.011554	0.211288	0.270136	0.086085	0.383892	0.329977	0.029991	0.181467	0.336151	0.450372	0.781248	0.449728	0.421027	0.134885	3.39602	0.351221	8.41045	7.78977	3.84073	0.087548	0.028637	0.397023
MSTRG.11131.6	0	0	0	0	0	0	0	0	0	0	0.094899	0	0	0	0	0	0	0	0	0	0.070261	0	0.411161	0	0.120332	0	0	0	0	0	0	0	0	0	3.01221	0.693059	0	0	2.74245	0	0	0
MSTRG.11131.7	0	0	0	0	0	0	0	0	0	0.026381	0	0.524502	0	1.45882	0	0.378656	0.469965	0	0.78415	0.337972	0.379271	0	0.814321	0.653071	4.45183	3.6445	3.26727	2.12915	0	1.45997	0	0	0	3.98387	3.43456	1.93358	1.67671	0	4.99515	0	0	0
MSTRG.11131.8	0	2.28764	0	0	7.78715	0	0	2.07011	4.32787	1.97019	10.7742	1.45511	2.22065	1.63457	5.13415	1.67727	1.27078	8.71499	3.52947	3.07466	0.728545	6.38347	4.02867	3.5362	9.91147	7.35828	5.39049	7.02668	9.73086	12.8984	0.362558	0.548381	0.367599	2.35415	5.326	3.75067	3.76392	4.60228	11.3675	2.95521	2.5825	1.09508
MSTRG.11131.9	0	0	0	0	0	0	0	0	0	0	0	0	0	0	0	0	0	0	0	0	0	0	0	3.82961	0	0	0.580999	0	0	7.93879	0	0	0	4.26863	6.98766	0	0	0	19.4119	0	0	0
MSTRG.11132.1	0	0.03796	0.152502	1.67126	2.08442	2.46866	0.469038	0.613791	0.475633	0.525105	0.207334	0.080032	0.249382	0.039946	0	0.06892	0.089198	0.354357	0.048364	0.810209	0.119017	1.09896	0.905066	1.5514	0.41974	3.32569	0.188339	1.28093	3.40694	1.34661	0.016404	0.026133	0.036692	1.05734	0.266616	0.484157	2.55609	0	1.85236	0.138389	0	0.596299
MSTRG.11132.2	0	0	0	0	0	0	0	0	0	0	0	0	0	0	0	0	0	0	0	0	0	0	0	0	0	0	0	0	0	0	0	0.259438	0	0	0	0	0	0.930605	0	0	0.039869	0
MSTRG.11132.3	0	0	0	0	0	0	0.694084	0	0	0.359728	3.71478	0.783034	1.02861	1.68461	1.38796	0.941783	1.57971	1.14226	1.09681	1.96615	0.931955	0	1.72389	0	8.94359	5.45967	7.2015	6.83752	0	6.50094	0.226252	0.182532	0.318833	0.461899	2.8371	1.84369	0.120002	1.08949	0.887497	0.529876	0.342544	0.473005
MSTRG.11132.4	0	0	0	0	0	0	0	0	0	0	8.18555	0.070863	0.161136	0.261239	1.42958	0	0.552256	2.65546	0.07457	0.43626	0.121323	2.1794	0.173034	0.581341	0.874926	0.83467	0.897522	0.725445	15.1097	1.20094	0	0.111336	0.133203	0.286145	1.35008	0.226485	0.048105	0.041377	0.343857	0.068877	0	0
MSTRG.11133.1	0	0	0	0	0	0	0	0	0	0	0.012617	0.014252	0.073627	0.045273	0	0.022245	0.055846	0	0.009744	0.017583	0	0	0.142358	0.021956	0.12014	0.223836	0.083322	0.229396	0	0.372826	0.597089	1.16313	0.052096	7.8894	2.80557	2.47247	0.480152	1.7838	0.386609	0.041778	0.176727	0.045359
MSTRG.11134.1	0	1.0495	0	10.7323	10.4535	6.32112	10.3256	1.57886	6.49235	1.26391	2.75239	0.276946	1.27527	1.41173	2.55483	0.926869	1.20062	1.23283	2.04975	1.64895	0.570935	1.06386	2.52874	0.655195	2.07034	3.98117	1.84278	3.63588	4.53846	14.4101	0.681081	0.330336	0.16322	11.319	8.31504	7.68933	3.63297	3.30643	2.85896	1.36413	0.982659	4.55963
MSTRG.11134.10	0	0	0	0	0	0	0	0	0	0.546338	1.36256	0.070863	0	0.280328	0	0.254625	0.634148	0	0	0.239303	0.068314	0.451652	1.71749	0.399543	2.68039	1.65366	0.817502	2.33455	4.96096	2.73657	0.092822	0.039295	0.091613	3.14335	1.73481	1.68706	0.173161	0.675514	0.55876	1.3201	0	0.872103
MSTRG.11134.11	0	0	0	8.27734	0	0	0	1.31424	0	0.24099	0.610455	0.162887	0.223071	0.185886	0.167452	0.174778	0.175385	0.429165	0.118509	0.276065	0.199738	0.407508	0.645125	0.26437	0.207156	0.587385	0.300814	0.671322	0.625723	0.375648	0.010478	0.003466	0.020994	0.652864	0.726681	0.381684	0.132245	0.272608	0.225038	0.107663	0.633528	1.75654
MSTRG.11134.8	1.38569	0	0.611709	0	0	0	0	0	0	0	5.2649	0.746851	0.018766	0.326506	0	0.99515	1.12403	0.06074	0.015679	1.71726	0.619834	2.29859	1.67223	2.81318	14.303	11.17	10.306	13.8981	7.93706	2.6272	1.64117	1.59989	1.80823	0.898039	0.296262	0.811377	0.125837	3.71401	0.265639	0	0.065477	0.345521
MSTRG.11134.9	1.54616	2.19248	1.38885	19.6341	11.9155	17.4101	4.42932	3.77441	7.14842	1.91313	7.46182	1.23211	1.78149	2.08577	2.59268	2.32265	4.19161	2.46423	2.22892	4.73322	1.67575	2.14325	7.40573	4.02844	18.9832	20.1997	12.7084	15.4057	12.2423	20.2653	0.94685	0.948872	0.880218	7.22321	4.59828	3.70691	2.19383	2.48285	1.76135	1.5716	1.31107	3.11571
MSTRG.11137.2	23.2755	48.7276	29.2663	51.3854	53.1966	30.5828	22.5619	28.4566	13.228	6.04335	7.01517	5.25815	5.84449	4.05411	6.05615	3.45436	6.61367	7.60772	6.6666	9.45483	4.92822	4.76407	11.2171	11.2175	28.3838	21.1288	32.545	23.1254	26.6371	24.4361	3.22511	0.427879	2.23043	1.74559	1.28037	4.99229	3.43295	1.66893	2.59239	4.89907	4.29457	4.47357
MSTRG.11142.2	3.27123	6.72041	5.49146	15.9607	12.5435	13.8147	10.1726	2.70463	5.8856	0.218938	1.39826	0.286385	0.60235	0.390872	1.08367	1.25124	0.374229	1.6821	0.219494	1.49476	0.07208	0.6322	0.44116	2.01231	10.9365	6.50573	7.48005	6.71689	4.68225	3.95177	0.790123	0.7048	0.655488	4.01029	4.2996	3.30154	1.98315	2.29307	0.815564	0.94225	2.96753	0.235377
MSTRG.11144.2	0	0	0	0	0	0	0	0	0	0	0	0	0	0	0	0	0	0	0	0	0	0	0	0	0	0	0	0	0	0	0	0	0	0	32.7571	0	0	0	0	0	0	0
MSTRG.11146.1	0	0	0.360998	3.66864	4.21527	0.801763	3.32582	0	0.80567	1.51804	5.48783	2.59959	2.04597	2.1145	1.78869	1.94227	2.34703	1.58292	3.81806	2.38541	1.8589	2.56709	4.22201	3.42701	5.12539	5.54593	5.19827	5.3979	7.66159	6.0964	1.2143	2.14318	0.527199	2.90825	1.40523	2.28079	4.33192	8.66247	6.69006	1.76225	2.04368	1.90566
MSTRG.11148.1	0	0	0	0	0	0	0	0	0	0	0	0	0	0	0	0	0	0	0	0	0	0	0	0	0	0	0	0	0	0	0	0	0	0	4.06231	0	0	0	0	0	0	0
MSTRG.11152.1	0	0	0	0	0	2.02621	0	0	0	0.072978	0.169807	0.201784	0.114787	0	0	0	0.388542	0.813037	0	0.160404	0.023925	0	1.93205	0.303636	1.61863	0	2.5112	1.00153	0	2.07625	0.004349	3.76506	3.52354	12.2127	4.56918	11.5407	1.03875	2.20089	2.26454	0.158292	0	0.075085
MSTRG.11152.11	2.11706	0.233309	0.254824	2.72632	2.00669	3.0245	4.21847	3.96629	1.65417	0.501564	0.260897	0.172246	0.240942	0.336033	0	0.070054	0.209627	0.139115	0.154658	0.485542	0.452812	0.091822	0.477771	2.18362	1.00881	2.67633	1.54181	0.336902	0	2.42974	1.00103	1.82691	1.3408	1.20204	3.33903	2.76268	0.447524	1.13387	0.537506	0.725446	0.912807	3.78155
MSTRG.11152.2	0	0	0	0	5.08512	2.38352	0	0	0	0	0	0	0	0	0.064276	0	0	0	0	0	0	0	0	0	0	0	0	0	0.285134	0	0	0	0.26388	7.42813	0	0	0	0	0	0	0	0
MSTRG.11152.4	0	0	0	0	0	0	0	0	0	0	0	0	0	0	0	0	0	0	0.770485	0	0	0.03756	0	0	0	0	0	0	0	0	3.35489	0	0	0	0	0	0.488296	0	0	0	0	0
MSTRG.11152.5	0	0	0	0	0	0	0	0	0	0	0	0.047614	0	0	0	0	0	0	0	0	0	0	0	0	0	0	0	0	0	0	3.45842	0	0	0	1e-06	0	0	0	0	0	0	0
MSTRG.11152.6	0	0	0	0	0	0	0	0	0	0	0	0	0	0	0	0	0	0	0	0	0	0	0	0	0	0	0.000856	0	0	0.00504	0.486106	0.979466	0.475624	1.71014	3.27677	2.39011	0.334767	0	0	0	0	0.139152
MSTRG.11152.7	0	1.07085	0	0	0.146104	0	0.229049	0.1874	0.21315	0.167462	0.944911	0	0	0.056305	0.109399	0.166647	0.988779	0.417111	0.035117	0.107567	0.041136	0.04832	0.097529	0.371156	1.12034	0.345025	0.18591	1.08291	0.705595	0.25847	0.692139	1.74633	1.34283	5.31327	5.55063	6.55239	0	0.774111	0.983036	1.9307	0.202069	1.21237
MSTRG.11155.1	0	0.422583	0	0	0	0	0	0	0	0.140818	0.471988	0.120574	0.272299	0	0.086212	0.227897	0.167232	0.256012	0.226833	0.393904	0.127648	0.226731	0.353144	0.577961	1.40384	2.02122	0.617487	1.4483	1.08722	1.71393	0.549721	0.174639	1.03297	3.38318	2.09839	1.51876	0.396105	0.4884	0.430716	0.577272	0.484161	1.68078
MSTRG.1116.1	2.18361	1.67349	1.07271	5.85816	9.833	9.40157	5.04689	3.47318	4.44429	5.14558	9.03316	3.10952	3.09712	3.60648	4.74391	3.18527	4.51393	2.42251	2.76141	4.85917	2.96547	3.33612	4.35656	6.21896	20.4707	23.7726	15.0701	14.2824	13.5856	16.5277	1.11305	1.789	2.45123	14.1139	11.5007	8.44659	6.55763	7.71689	8.87189	5.90499	4.8471	7.78639
MSTRG.1116.3	0	0	0	0	0	0	0	0	0	0	0.259784	0.245502	0.069938	0.075615	0.104188	0.271093	0	0	0.13482	0	0.085538	0.18021	0.180451	0.1364	0.69531	0.631797	0.457897	0.547081	0.437903	1.79091	1.15483	0.798682	0.673738	1.81954	2.24194	3.65042	2.19263	2.39803	0.326503	0.25056	0.687476	0.281867
MSTRG.11161.1	1.18001	0.459278	0	42.698	19.3715	15.7215	4.81609	9.63962	9.04975	0.791007	5.60409	0.59966	1.46117	0.544985	5.03317	0.919086	1.96205	3.59625	0.831891	5.01188	0.390921	1.98584	7.65748	1.13475	20.8698	19.2331	9.52258	39.5663	16.8963	30.7367	0.923184	0.19576	1.17217	5.98789	3.21416	2.7419	0.306744	0	0.195496	0.327017	0.124134	2.15756
MSTRG.11162.1	1.35614	2.84979	2.22212	7.0918	11.4916	12.315	5.83994	2.57395	4.64985	3.5315	6.84081	2.62409	2.2499	1.9136	5.44856	0.973532	4.06239	1.40622	1.40339	6.63662	0.631447	2.34704	4.86259	4.00516	24.8414	16.8034	10.8043	22.1097	16.4517	12.565	0.191401	0.338921	0.907338	7.54551	2.03786	9.81495	4.57759	7.68001	6.60067	3.06527	2.80588	1.70223
MSTRG.11162.2	0	0	0	0	0	0	0	0	0	0	0.175822	0	0	0	0.399815	0.125589	0	0.523297	0	0.504645	0	0	0	0	0	0.013527	0	1.46326	0	0.873053	0	0	0	0.352931	3.05729	0.098622	0.043417	0	0	0	0.108943	4.78363
MSTRG.11162.3	0	0	0.165895	0	0	0	0.065811	0	0.647086	0.651881	0.151146	0	0	0	0	0	0	0	0.265381	0.029926	0	0	0	0	0.071474	0	0	0.909807	0	0	0	0	0	0	1.968	13.0431	0	0.606978	0	0	0	0
MSTRG.11167.1	0	0	0	0	15.7677	16.2554	0	3.36649	3.65545	0	0	0	0	0	0	0	0.065141	0	0.002798	0	0	0	0	0	0.16741	0.102891	0.220406	0.494328	0	0.034075	0	0	0	0.734338	0.031865	4.39191	0	0	0	0.354082	0	0.741598
MSTRG.11172.1	11.5274	15.7933	19.7368	54.0403	65.0126	63.9166	30.8326	17.0762	34.695	10.4602	25.1611	13.1976	11.8514	11.2618	15.0393	10.2203	16.1707	8.3255	8.88334	18.4701	9.90762	12.2347	20.2675	25.0018	69.6399	69.2412	46.5901	44.5557	46.6582	57.4813	3.80538	5.3164	4.4831	23.2672	22.8483	12.5123	12.2569	22.5164	14.8004	11.3535	8.92931	17.4029
MSTRG.1118.2	2.06238	2.09204	0.981513	27.8331	31.1971	28.4039	15.6695	5.1799	8.1113	3.20818	14.5172	1.83073	2.24907	1.55702	4.20578	1.44687	4.52025	1.89348	1.85871	4.83365	1.46969	1.89947	4.51798	4.07703	29.6556	34.6314	18.8584	17.9745	19.25	28.66	3.43427	3.49792	4.2621	47.6548	20.6594	16.2244	13.6238	9.56575	10.8816	7.59723	4.38618	19.5445
MSTRG.11181.2	0.555449	0	0.589607	1.70891	3.98428	5.39332	3.83956	0.5575	5.22678	1.29953	2.8512	0.9232	1.46282	0.999492	1.37598	0.908491	1.93668	1.13123	0.867076	1.76843	0.968539	1.27759	2.4189	2.28874	7.06879	5.92101	4.30254	4.7077	4.77272	6.02142	0.38962	0.303901	0.375467	4.36972	3.15897	3.13508	1.03497	3.09184	0.786039	1.21904	0.952036	1.44286
MSTRG.11182.1	0	0	0	0	0	0	0	0	0	0.019183	0.145698	0.039678	0.476216	0	0.139809	0	0.080002	0.02603	0.043661	0.639516	0.613967	0	1.18199	0.106328	0.326028	0.038149	0.630698	0.521621	0.226493	0.308222	0	0.435681	0.196394	0.692976	0	0.388594	2.12059	0.78622	1.38088	0	0.008916	0.050915
MSTRG.11185.1	0.826461	1.02993	0.728797	4.56553	3.39349	4.44172	1.96498	1.2573	1.42385	1.14633	2.48735	0.76734	1.08298	0.909672	1.38096	0.951216	1.87185	0.668222	0.849539	1.71116	0.849759	1.23282	1.82154	2.48784	8.16084	8.8584	6.43679	6.01401	5.41513	7.65078	0.85211	0.73971	1.21604	8.11731	7.98031	7.05523	3.86547	4.99718	5.52671	2.88891	2.35093	5.10678
MSTRG.11185.3	0.543811	0.940068	0.59316	7.77068	6.88727	8.45497	0	1.62772	1.96645	1.0497	3.05386	0.06376	0.890691	0.773312	1.46829	0.665107	1.90511	0.044959	0.474436	2.06249	0.035947	1.03712	2.0213	2.66506	10.5601	13.228	8.25466	7.5101	6.86362	10.0926	0.53902	0.395006	0.485958	8.6325	6.65754	4.9037	3.68642	2.57977	3.04116	3.15168	2.27447	6.05839
MSTRG.11185.4	0	0.538783	0	1.72391	3.52161	0.971473	5.0472	0.822055	0.934645	0.558931	1.48493	1.09646	0.625914	0.709449	0.905594	0.957877	0.647975	0.820118	0.661323	1.08955	0.937453	0.454453	1.36972	1.09331	4.29971	5.52873	3.28537	3.58908	4.24483	4.88923	0.341515	0.123875	0.652763	4.60393	5.44655	3.27668	2.0383	3.88404	2.86218	0.951945	0.972775	3.08669
MSTRG.11195.1	1.75237	3.76397	2.00238	6.47463	12.9723	10.8542	6.36896	8.15695	5.49791	1.68864	4.53443	1.40414	2.55595	2.01546	2.18594	1.65516	3.97344	2.69093	2.92847	2.81206	3.28096	2.81345	5.1063	8.41646	11.517	10.1493	14.8028	8.45805	12.5269	9.93641	0.59928	0.299299	0.938353	3.07242	2.32003	2.0068	3.30665	1.68435	2.22281	2.2241	2.6751	2.80671
MSTRG.11201.1	23.944	29.216	19.5464	201.402	162.223	13.5967	5.67173	66.5937	5.66807	3.75705	9.08036	1.64309	4.04049	2.11345	4.18677	2.53971	4.04077	3.81607	1.88382	3.8774	1.65638	3.70576	6.47191	3.29337	20.0231	16.1855	8.22254	21.2722	17.9461	14.1289	0.442632	0.375079	0.584077	3.50768	2.11715	13.4673	1.13444	2.24279	10.2997	1.13971	0.73524	2.34954
MSTRG.11204.3	57.4054	26.2115	0	1.27295	40.97	0.258076	1.29954	17.2993	33.108	2.16384	4.47928	0.010076	0.198801	0.069423	3.97215	0.483015	0.475832	0.335114	0.039703	3.14591	0.024375	0.066409	3.89895	4.04396	38.1079	7.32859	11.4994	27.13	19.4124	15.9692	0.041057	0.998885	1.15782	21.74	6.08597	16.8326	0.971302	0.651057	4.86711	0.094031	0.143262	0.431663
MSTRG.11208.1	0	0	0	0	0	0	0	0	0	0	4.07435	0	0	0	1.84575	0	0	0	0	0	0	0	0	3.74147	9.27216	7.21167	0	16.274	6.18532	6.76997	0	0	0	2.18318	0	6.61104	0	0	0	0	0	0
MSTRG.11211.1	0	0	0	0	0	0	0	0	0	0	0.648001	0	0.1427	0	0.24524	0.107904	1.2091	0.535775	0	0.791581	0	0.183921	1.27152	0.541572	3.12623	7.74721	2.45775	5.19467	3.2163	3.18461	0.422928	0.638554	0.380322	5.24404	1.51289	1.59625	2.63657	0.628027	0.142746	1.31815	0	2.35812
MSTRG.11213.1	0.823212	0.608619	1.58184	2.52471	3.99568	3.18329	2.61872	1.48901	2.10441	1.01997	2.80808	0.622933	1.1165	0.660408	1.80261	0	0.950393	0.862948	1.10769	1.85421	0.804336	0.731774	2.46957	5.318	5.10969	4.15343	6.35896	3.59382	4.93768	9.14658	0.458633	0.493966	0.369434	0.68842	0.494393	0.691275	0.591101	0.619138	5.08124	0.509189	0.120537	0.729604
MSTRG.11215.2	0	0	0.41084	0	0	0	0	25.3516	14.6279	1.81622	7.12602	2.30047	9.15886	2.0309	2.39242	0.725046	3.14742	8.86534	14.6835	5.04988	2.63504	3.25383	8.71746	18.163	0.941474	1.9299	5.29672	2.34655	0.728603	1.01617	29.5585	22.8002	18.5223	0.99031	1.86192	2.62343	16.7201	9.98906	72.4716	2.79414	1.59002	3.07383
MSTRG.11215.3	3.11655	3.43333	3.83262	4.06672	2.37765	3.46326	3.43654	0.814815	1.09116	1.92604	5.15793	2.9918	3.44359	1.7504	3.00303	1.45689	3.35393	4.44393	4.1853	3.62581	2.08074	3.07069	4.25331	6.70485	6.90664	8.32201	5.73095	5.93545	5.32988	8.02325	1.49095	1.31264	1.42174	3.80956	4.14589	2.73913	3.48569	2.78467	7.26544	3.23212	2.55572	3.11419
MSTRG.11215.4	0	0	0	0	0	0	1.03124	0	0	0	2.51677	0.583967	2.37814	0	0.561973	0.123232	0.348165	3.33762	2.57625	1.33401	1.47284	1.50534	0	5.09162	0	0	0.883852	0	0	0.355347	4.04438	4.60435	3.30654	0	0.222804	0	4.01199	0.326743	20.6256	1.20857	0.778461	0.328521
MSTRG.11215.5	0	0	0	0	0	0	0	0	0	0.230368	2.79419	0.926998	2.59639	1.52727	0.424471	0.111143	0.804285	3.80364	2.76997	1.70206	0.457782	2.11082	1.96473	5.03663	0.921486	1.21367	4.18532	3.2052	1.172	1.73638	1.09177	3.79226	1.85461	0.649336	0.413157	0.932688	3.63838	1.5478	14.3286	1.16343	1.03875	1.79264
MSTRG.11217.1	1.2701	0.843897	1.36248	9.42887	7.19503	6.96191	10.4114	11.6383	11.1552	6.21654	4.61737	2.32583	5.23926	1.28393	6.02236	0.613215	2.99938	1.60103	1.65666	1.41854	1.32162	2.20413	7.06816	7.42021	7.59092	8.15172	3.25704	9.39172	5.71793	11.0401	0.187285	0.476692	0.589556	3.31436	0.977889	2.19093	2.27191	1.37552	4.63837	1.03777	0.976461	0.46746
MSTRG.11217.4	0	0	0	0	0	0	0	0	0	1.52856	1.98397	0.702794	0.296942	0	3.6013	7.08017	0.036852	2.18491	0.044151	0.084076	5.05603	0.08791	4.95017	1.2331	0.82093	2.74788	3.73482	3.08227	0.439952	9.88423	0.434881	0.890534	0.669154	0.575499	0.036353	0.144655	3.90081	0.410342	1.592	1.11426	0.077876	0
MSTRG.11217.5	0	0	0	0	0	0	0	0	0	0.985865	5.25934	4.59603	1.28175	0	3.74153	3.2432	0.153356	0.380972	0	0	2.40769	0	3.45924	7.10034	0.300267	0	1.79612	1.92966	0.651821	3.48161	0.830813	2.27705	0.986079	0.264458	0	1.84508	3.20287	0.166649	2.01064	0	1.08807	1.24533
MSTRG.11221.1	1.72303	3.02951	2.90096	10.6171	14.5742	13.1663	7.42569	3.57421	8.08864	1.28847	4.72743	1.8022	1.22975	0.810175	3.01957	0.754262	1.33767	0.978334	1.61371	2.32459	1.54289	2.17669	2.94106	1.85203	9.99208	8.25726	4.37371	5.21149	6.64918	10.9095	0.29446	1.71014	0.3364	3.07657	3.07147	1.69131	0.674704	1.03051	1.55966	1.28645	1.19955	1.7553
MSTRG.11221.10	0	0	0.724475	4.13069	30.8914	0	2.15986	3.62674	4.17537	2.86931	2.92307	0.988316	0.93843	3.23121	4.88859	3.63735	3.51794	2.86268	1.01328	1.76398	0.86087	4.26614	4.57901	1.69577	14.8504	7.12711	2.31914	4.95134	3.52431	4.91822	1.44724	0.329456	2.1562	9.85744	8.54136	6.18259	6.19791	9.28253	11.29	1.05394	0.317027	2.37087
MSTRG.11221.5	0	0	0	0	0	0	0	0	0	0	1.70627	0.576481	0.391485	0	0.251691	0.201204	0.261731	0.410016	0	0.52193	0	0.50663	0	0	3.00479	3.48726	0	2.29669	2.44708	1.4637	0	0	1.36071	1.61153	2.72449	4.80455	2.07811	2.84234	2.67909	0	0	0.674463
MSTRG.11221.6	0	4.59924	0.824322	16.3842	6.66016	15.323	9.93007	5.66298	6.9248	3.68025	8.66094	3.18018	1.66175	1.15282	3.54941	2.22711	4.45938	3.64485	4.02937	7.80657	4.69046	3.29116	7.537	8.68186	19.832	18.5809	18.0469	20.058	18.7004	17.3931	1.31238	0.611589	1.68699	5.06121	9.02887	8.65253	3.52685	6.35044	3.8638	1.10363	1.38237	3.00508
MSTRG.11222.1	0	0	0	0	0	0	0	0	0	0	0	0	0.017462	0	0	0	0	0	0	0.018362	0	0	0	0	0.055891	0.037153	0	0	0.007359	0	0.009522	0.005934	0.042714	0	0.043535	0.028788	0.582085	0.04667	11.6553	0.027409	0	0
MSTRG.11222.2	0	0	0	0	0	0	0	0	0	0	0	0	0	0	0	0	0	0	0.000136	0	0	0	0	0	0	0	0.104976	0	0.003084	0.044174	0.004889	0	0.202347	0.321969	0.034918	0.045307	0.526087	0.140481	0.309132	0	0	0.01472
MSTRG.11225.2	0	0	0	6.24619	0.424168	0.43671	0.260396	2.71623	7.54418	0.086142	0.584844	0.073304	0.013072	0.091369	0.158458	0.073619	0.138751	0.059522	0.046396	0.012216	0.094316	0	0.382072	0.023386	0.445958	1.1683	0.005191	0.574307	0.531197	0.248171	0	0	0.001352	0.550977	0.046914	7.17659	0.140904	0.043193	0.006119	0.444124	0.127945	0.214477
MSTRG.11225.3	0	0	0	0	4.74106	3.85481	0.94468	0.415404	1.82701	0.138394	0.222425	0.138452	0.059014	0.097938	0	0	0.454071	0.010989	0	0.097708	0.10836	0.056525	0.394084	0	0.360457	0.406659	0.221859	0.352883	0.072419	0.114504	0.085848	0.002711	0.006957	0.016489	0	2.94695	0	0.038051	0.042572	0.298623	0.185482	0
MSTRG.11225.4	0.426388	0.154891	0	0	0	0	0	0	0	0	0	0.159001	0	0.068277	0	0	0.145326	0.027787	0.140545	0	0.293083	0	0.212516	0.073834	0.275474	0	0.103758	0.483859	0.034903	0.304955	0	0.05146	0.109886	0.00283	0.052206	4.59039	0.05034	0.024363	0.076938	1.16322	0	0.202967
MSTRG.1123.1	2.8153	3.69987	1.13283	11.4764	15.3599	16.4385	4.89944	12.3729	10.1868	1.48391	4.46147	1.71602	1.73596	2.03434	2.40902	2.01883	1.73526	1.60425	2.08923	2.53051	1.45838	1.91251	2.73137	3.67854	14.041	10.4407	8.35535	7.42473	8.0445	11.2669	0	0.400719	0	0	0	0	1.73692	1.27828	2.46502	1.71019	1.47235	2.2692
MSTRG.11231.2	2.88598	2.36135	2.85273	21.0149	13.2894	14.7556	9.22702	9.97315	7.84713	0	0	0	0	0	0	0	1.78482	0	0.820457	0	0	0	0	1.24893	2.4042	3.38276	0	2.19167	0	0	0	0	0	4.22993	1.0042	0	0	0	0	0	0	0
MSTRG.11234.1	4.50055	6.79222	6.64651	14.1191	16.1463	14.1601	11.5283	10.103	14.0687	6.77584	8.50539	6.97429	6.26263	6.28389	7.01958	7.55031	10.0522	5.64566	4.47524	11.1438	4.6874	7.33965	10.2642	11.2396	15.0372	16.0269	11.3691	15.7465	16.146	18.8947	0.58307	0.596623	0.437871	3.73827	2.31724	2.48688	3.63854	3.81722	3.61759	2.6527	2.7956	2.64767
MSTRG.11234.3	0	0	0	0.234972	0.246018	0	0	0	0	1.66003	1.14633	0.059964	0.401263	0.117619	0.134634	0.099862	0.401395	0.951507	0.08245	1.68319	0.46228	0.648254	0.82186	1.64989	11.8606	9.32562	2.95887	9.70393	2.8675	2.03595	0.531991	0.263803	1.14497	3.16334	4.33384	7.13115	0.678478	1.05617	0.967506	0.093033	0.733628	0.757073
MSTRG.11235.1	2.77011	1.01737	2.81918	13.1022	4.16962	11.0084	7.87377	5.153	5.10652	4.01419	8.73649	3.39293	3.11257	2.43227	4.10632	3.6537	5.64239	2.51628	3.17706	5.19499	2.40888	2.70784	6.77691	5.42032	17.5177	10.6522	8.90489	17.4869	14.6585	14.7847	0.757029	0.551549	1.40354	6.71882	7.0421	4.69886	2.66406	4.01548	4.23461	2.60062	2.40882	4.20706
MSTRG.11243.1	0	2.11106	0	0	0	4.54283	2.24742	0	2.46233	0.978883	1.47869	1.2455	0.684552	0.889812	0.92275	0.875059	1.04679	0.890828	0.921503	1.33256	0.562619	1.35179	1.04003	1.19196	2.52004	2.99144	1.71988	1.95233	1.64066	1.85984	0.1922	0.633931	0.086195	0.875824	0.743062	0.574517	0.726366	3.37496	0.834371	0.674217	0.467269	0.600389
MSTRG.11245.2	0	0	0	0	0	0	0	0	0	0	0	0	0.152921	0	2.96053	0	0	0	0	3.00008	0.417636	1.4774	0	0	1.10362	0	7.62427	0.615835	14.0864	11.4574	0	0	0.594915	0	0	7.58401	0	0	0	0	0	0.374986
MSTRG.11245.3	0	0	0	0	0	0	0	0	0	0	0	0	2.49561	0	0	0	0	0	0	0	0	0	0	0	0	0	0	0	0	0	0	0	1.42653	22.6604	0	0	0	0	4.03865	0	0	0
MSTRG.11245.4	0	0	0	0	0	0	0	0	0	0	0	0	0.01415	0	0	0	0	0	0	0.032567	0	0	0	0	0	0	1.20722	0.052582	0.060229	0.073578	0.384383	0	0.019993	0.499605	9.78007	2.91701	0.286901	0.06275	0	0	0	4.19294
MSTRG.11251.2	0	0	0	0	0	0	0	0	0	0	0	0	0	0	0	0	0	0	0	0	0	0	0	0	0	0	0	0	0	0	0	0	0	0	1.4327	0	0	0	3.28633	0	0	0
MSTRG.11252.1	12.425	4.12392	2.88192	16.3849	8.0944	11.0138	7.36366	7.65021	8.9707	2.85686	2.17556	1.37999	2.902	5.62406	1.2589	1.97833	3.80499	2.07404	1.89455	2.10431	4.01712	1.58129	2.74031	3.38524	3.10697	2.79781	2.27705	2.67422	2.20886	2.8692	2.09984	2.37335	3.07091	2.1883	2.28299	3.09419	0.97974	1.5614	4.15623	4.34384	3.67777	2.95274
MSTRG.11252.2	0.898567	2.38699	4.28116	7.42782	0.307216	0.000331	1.24539	1.47111	0.171483	0.991531	0.564739	0.308521	0.434479	0.792121	0.090326	0.642035	1.55835	0.496278	0.204106	0.113868	0.865964	0.327867	0.296068	0.85849	0.353122	1.35303	0.587081	0.293761	0.180206	0.619591	0.901027	0.317021	0.189858	0.391915	1.11878	0.499124	0.422563	1.05964	1.69269	0.676116	0.62944	0.787033
MSTRG.11252.3	0	2.78633	3.05456	4.84513	0	0.014462	1.94371	0.933861	0.044914	0.309641	0.263842	0.536994	0.782362	1.44649	0.229847	0.160152	1.11795	0.071568	0.362478	0.616581	1.3454	0.190412	1.30393	1.49065	0.743377	0.546982	0.381128	0.662768	0.726092	0.628203	0.358042	0.244248	0.364808	0.450279	1.6813	0.784545	0.204722	1.03467	0.812028	1.28512	0.552261	0.489138
MSTRG.11257.1	0	0	0	0	0	0	0	0	0	4.81719	13.4406	3.99892	5.1231	3.57056	5.80103	2.16837	4.06145	4.07123	2.47512	7.03383	1.76344	1.72688	9.37021	11.7771	25.5686	19.8665	14.7925	27.6412	22.0097	19.7259	1.24507	0.697194	1.44363	5.49249	5.43008	4.87291	1.12776	1.16307	1.96927	1.76807	0.529871	2.27453
MSTRG.1126.1	16.1473	15.8942	5.47744	0	0.542058	0.235831	0.387122	35.441	4.80093	5.00146	26.8955	3.1167	6.10289	0.08859	6.87882	0.258499	1.09318	5.20613	0	17.8606	0.366761	5.50107	11.59	11.0678	45.7526	35.7127	25.0768	60.4581	40.4634	77.9801	0.820607	0.89374	0.005224	20.45	8.19682	1.04755	0.780017	3.05979	8.21688	8.99517	9.08981	35.2048
MSTRG.1126.2	0	0	0	0	0	0	0	0	57.2543	0	5.59758	0	0	0	2.6208	3.96175	0	0	0	0	0	3.82878	5.72424	4.59669	25.8364	0	0	0	19.1172	6.87674	1.02132	0	3.5434	2.25985	1.79274	1.63245	0.29247	3.92347	1.93986	0	0	10.8289
MSTRG.1126.3	0	0	0	0	0	0	0	0	0	0.358014	0.344539	0	0.310353	0	0.069674	0	0	0.907449	0	0.814153	0.166086	0.279543	0.363478	0	7.61325	2.33487	4.43054	6.3049	3.19005	2.25733	0.359095	1.54835	0.682777	5.61996	5.71852	1.12535	0.438505	5.73833	0.705619	0	0	0
MSTRG.1126.4	0	0	0	0	0	0	0	0	0	0	0	0	0	0	0	0	0	0	0	0	0	0	0	0	0	0	0	0	0	0	0	0	0	0	0	1.25787	0	0	2.14612	0	0	0
MSTRG.11261.1	56.1377	77.2721	23.7935	227.037	168.715	264.867	104.477	44.0431	106.681	0.236194	4.38764	3.35587	2.14436	3.68829	3.15791	4.58234	5.86805	3.46493	1.65262	3.69983	3.6877	1.75065	5.96581	9.50208	26.1982	22.8388	7.92573	6.43834	15.7685	16.0752	0.378194	2.49341	2.06606	2.30703	5.39773	0.332011	2.49265	6.80042	3.16843	3.87696	3.25704	4.17974
MSTRG.11261.2	0	0	0	0	0	0	0	87.6417	0	1.27095	0	0	0	0.324065	2.33817	0.865615	0	0	0.025519	0.03472	0	0.048365	2.16101	0.422749	0	0	0.027605	0.112864	1.77616	0	3.12675	0	0.332236	0.900619	0.072377	8.76142	0.105261	0.774704	0.201206	0	0	0
MSTRG.11261.3	0	56.8607	22.7568	0	124.107	0	0	0	0	7.17157	9.83045	0.975056	5.51439	1.77633	1.60034	0	1.12313	0.872805	4.9071	7.00621	1.06754	6.36481	2.94955	2.19499	2.91845	1.20297	19.5011	23.7186	3.59293	5.0067	0.052771	0	0.206629	6.91037	0.173303	0	12.148	0.889064	10.4167	0.912041	0.129345	0
MSTRG.11262.1	2.77046	7.26861	5.11885	19.7632	20.2492	25.1126	14.6496	6.53367	18.0839	6.81553	13.6128	6.06764	4.20742	5.56816	3.5836	6.17676	8.91624	5.86796	4.43937	10.6157	3.55593	6.48141	10.0215	12.8915	40.8371	30.9914	23.7813	31.9684	30.2067	30.1703	1.42515	0.811968	0.403449	3.55188	5.45492	7.81144	0.758313	1.56758	1.68172	2.89281	2.32246	3.66712
MSTRG.11262.3	0	0	0	0	0	0	0	0	0	0.527966	3.655	1.29703	2.96232	0	7.66452	0.188187	0.843803	0.68545	0.460151	1.23684	0.222278	0.263134	2.28791	1.91439	3.79232	3.81468	1.87004	1.70276	1.11118	2.44944	0.182175	1.13083	2.89449	7.43074	4.21117	1.23881	3.77786	6.527	3.43044	0.213218	0	0.417211
MSTRG.11263.2	0.563134	0.697716	0.328486	17.2286	9.61067	5.73622	4.92531	2.28424	0.64391	0.57477	4.41876	0.103836	0.31481	0.535041	0.308271	0.539429	2.20892	0.606709	0.353377	0.552709	0.30225	0.743748	3.35739	1.99765	6.85638	3.34978	3.35184	12.677	5.50581	6.16024	0.654515	4.31912	7.73474	3.06869	6.64438	7.53121	0.463275	0.503356	0.67423	0.638077	0.176748	1.04899
MSTRG.11264.2	0.774751	1.27983	1.10883	10.5526	11.1418	9.3298	5.36321	3.16228	4.10617	1.13341	1.0669	0.505352	0.371641	0.427546	0.22606	0.211669	1.87726	0.392872	0.434812	1.02047	0.15229	0.496219	1.60125	1.34484	5.31099	4.51456	2.70494	7.19116	3.09998	3.75925	0.203328	0.225188	0.572364	2.25866	5.30344	5.11356	1.1647	0.833582	1.79332	0.541627	0.335017	0.992914
MSTRG.11264.3	0	0	0	0	0	0	0	0	0	0	0.495326	0	0	0	0	0	0	0	0	0	0	0	1.12546	1.05462	0	0	0	0	4.45718	1.31204	1.23233	0.550698	0.369148	1.14143	2.377	3.5865	0	0	2.82709	0	1.04018	0
MSTRG.11264.5	0	0	0	0	0	0.414932	0.582954	0	0	0.412729	3.95672	0.045493	0.019713	0	0.292375	0	1.25615	0.306152	0.038991	0.170309	0.453433	0	0	2.2053	3.91096	2.17473	3.36921	3.85855	2.72952	1.36269	2.15165	0.856724	1.42203	5.94262	3.81591	3.20151	0.259608	1.0481	1.19439	1.54427	0.208766	1.74289
MSTRG.1127.1	0.530701	0.837051	0.198407	6.75146	8.41476	7.28631	2.43072	2.70117	3.96199	0.475109	1.19611	0.207036	0	0.236441	0	0.002733	1.11705	0.028591	0	0.550731	0	0.438497	0.668011	1.12633	3.5486	5.24411	1.23457	2.3139	1.78283	2.4474	0.150383	0.493766	0.534529	4.80636	3.70275	3.43162	0.912365	0.362059	1.01321	1.53298	0.531317	3.73387
MSTRG.1127.5	0	0	0	0	0	0	0	0	0	0.085023	0.153408	0.084719	0.040048	0.049021	0.26879	0	0.043042	0.013818	0.048832	0.195991	0.080935	0.080279	0.383899	0.05903	1.0703	0.545409	0.205338	0.300505	0.346563	0.357133	0.487084	0.046141	0.577381	3.36531	1.92548	3.17253	1.2785	0.35861	1.0508	0.353504	0.322486	0.528677
MSTRG.1127.6	0.872138	0.626043	0.36859	6.28305	9.45591	6.86728	6.2906	2.0136	2.91451	0.775208	1.55659	0.215571	0.697243	0.572479	0.062261	0.119027	0.029118	0.714415	0.037429	0.081488	0.056368	0.02037	0.504547	0.760146	2.61639	4.15277	1.53215	3.70937	1.35681	3.89655	0.80865	1.59598	2.26024	23.0707	17.9813	17.0459	3.89934	4.05944	4.60032	2.80095	2.64444	9.10659
MSTRG.1127.7	0	0	0	0	0	0	0	0	0	0.315993	1.35536	0.259876	0	0.338823	0	0.000306	0	0	0	0	0	0	0.420787	0.403286	3.3382	2.62851	1.74995	1.41673	2.02126	0.883061	0.669065	1.79403	0.795549	6.68169	3.20343	5.57747	0.919931	0.553885	1.1062	2.40096	0.776853	7.88589
MSTRG.1127.9	0	0	0	0	0	0	0	0	0	0.195655	0.430514	0.200838	0.12612	0.059615	0.562119	0	0.343068	0	0.254387	0.274725	0.356435	0.233541	0.300593	0.073028	2.00175	1.43854	0.603688	0.934088	0.60417	1.1659	0.278625	0.254065	0.366886	3.90461	3.14002	2.91538	1.06367	1.69117	1.94407	1.75032	0.348376	3.1427
MSTRG.11272.2	0	4.02745	0	0	0	0	0	0.491714	14.8581	5.48166	150.559	63.7074	10.4368	4.94785	12.1624	83.9211	5.2922	94.4014	10.4471	127.862	3.84674	9.96752	18.5908	6.55976	96.3716	123.531	174.388	147.064	149.781	146.116	4.39492	5.94917	4.36407	5.81662	8.95357	6.59963	2.98258	5.62312	9.45082	4.23606	1.04528	14.0795
MSTRG.11277.3	0	0	0	0	0	0	0	0	0	0.301909	1.2282	0	0	0	0	0.795175	0	0.406539	0	0.285833	0	0	0.486764	0.442386	2.65477	0.846043	2.59501	7.67312	2.50732	3.34773	0.104224	0	0	0	3.06163	8.78505	0	0.222375	0.315275	0	0	0.462233
MSTRG.11282.1	0	0	0	0	0	13.8839	1.35342	0	0	0	0	0	0	0	0	0	2.0375	1.38946	0	0	0	0	0	0	0	0	0	0	11.4109	0	0	0	0.026705	0.075704	0.031515	0	0	4.85764	0	1.56514	0	0
MSTRG.11282.2	14.4792	43.4052	22.7788	45.4892	0.501257	45.9134	0	26.9829	24.4154	7.34482	19.9105	7.56806	9.73007	5.09253	9.58509	7.35586	8.58977	7.64407	5.43291	10.282	6.74019	6.32515	15.6337	14.4235	46.8569	32.978	32.549	36.6421	30.0507	37.5852	1.16005	1.68394	5.29655	18.9577	16.9245	10.516	2.86853	17.3292	5.08135	7.01863	4.54772	10.9761
MSTRG.11283.1	0	0	0	2.52137	3.08086	2.35833	0.71955	0.330491	0.374406	0.3113	1.39979	0.18061	0.55416	0.023203	0.525591	0.039873	0.466783	0.138044	0.172499	0.897839	0.08702	0.073379	1.13597	0.289652	5.38133	2.85168	1.00465	6.87404	3.25017	2.80245	0.151485	0.096861	0.097798	2.98046	0.622475	4.90478	0.434896	0.202754	0.689046	0.408524	0.015775	1.78311
MSTRG.11286.1	1.98451	12.1884	3.11982	12.9728	22.0898	28.5333	10.8019	7.41482	8.83796	4.95371	11.7966	4.48201	5.36533	5.49118	7.61044	4.21188	7.05051	4.71687	4.25649	9.26176	5.99535	5.76484	12.571	8.86188	19.8761	18.6898	17.5581	16.802	18.478	20.1781	1.61884	1.4045	2.83163	13.6496	12.9637	7.0834	10.776	14.9331	12.4705	7.38546	6.30392	6.96457
MSTRG.11288.1	0	1.16693	0	0	0	5.31432	0	0	0	0	0	0	0	0	0	0	0	0	0	0	0	0	0	0	0	0	0	0	0	0	0	0	0	0	0	0	0	0	6.64949	0	0	0
MSTRG.11290.1	0.437427	1.0169	0.687047	5.14389	4.97167	4.90474	2.34649	5.41802	2.95286	2.77589	5.9079	2.11877	2.95463	1.12341	4.80266	2.24684	2.91232	2.58248	1.86663	2.77451	0.747736	1.3761	4.84265	6.08904	11.1085	11.3981	5.86642	11.225	6.50566	19.3126	0.84798	0.725596	0.720334	6.66429	7.20337	4.48338	1.23907	0.701599	4.18913	1.22967	1.21773	3.10841
MSTRG.11291.1	0.22791	0.785625	0.396412	0.894307	1.10145	1.2212	0.88604	0.742156	1.12434	1.64264	5.12511	2.08393	1.99304	1.04113	3.80212	2.30903	1.53817	1.47972	1.61573	1.28781	1.56581	1.78908	2.12849	3.45699	3.60405	4.03236	5.25737	3.3055	5.39152	7.99807	0.296865	0.23097	0.443409	3.49525	2.90588	2.31012	1.99072	0.975354	4.53974	1.14976	1.04601	1.85515
MSTRG.11291.2	0	0.024329	0	0	0	0	0	0	0	0.00093	0	0	0.009659	0	0.014588	0.831869	0.001427	0.104337	0.08659	0	0.002803	0.135618	0	0.016452	0.01156	0.046599	0.57958	0.165298	0.209218	0.017669	0.118145	0	0	0.026984	0.585124	0.003539	0.241657	0.066726	0.66169	0.031289	0.109284	0.576283
MSTRG.11292.1	5.6856	5.51706	5.68492	40.2968	26.8639	27.5697	24.4518	17.2452	11.8645	6.02374	11.9758	5.44696	6.01621	5.30995	6.58412	6.45212	6.80423	8.14525	4.45138	6.38777	2.78395	5.36705	9.54487	11.3877	29.8585	20.6572	15.032	27.3941	24.0278	24.7971	1.86062	2.01974	2.46293	13.812	11.9412	17.55	6.6941	7.71615	13.1426	2.94588	2.98946	4.15032
MSTRG.11295.1	0	0	0.111137	3.99082	2.1708	9.8e-05	0	5.49051	0	0.036435	0.011651	0.016534	0.007576	0.01331	0.044807	0	0.004791	0.009142	0.001043	0.003774	0.027559	0.02106	0.033217	0.004122	0.046401	0.0161	0.031848	0.013487	0.039198	0.003364	0.001922	3.39854	0.003256	0.018347	0.030031	0	0.016388	0.005489	0.003771	0.013867	0.011898	0.023603
MSTRG.11295.3	0	0	0	0	0	0	0	0	0	0	5.74921	3.27749	0	0.077997	5.49606	7.70024	0	2.73131	0	0	2.863	0	7.38463	0	3.42726	2.00813	7.82914	3.45352	4.59219	5.01794	1.93522	1.28781	4.81308	0.512007	1.84235	0	2.20664	0	2.27639	0	0	0
MSTRG.11295.4	0	1.05609	0.110551	0	0	0	0.161523	0	1.45363	0.424851	0.542443	0.083991	0.091314	0.25311	0.937203	0.170505	0.221439	0.176042	0.24523	0.385066	0.054294	1.34536	0.308528	0.34268	2.6614	0.624404	8.16767	3.08602	2.50635	1.5941	0.794971	0.065766	0.05455	2.27719	0.439688	4.39914	1.09404	0.70031	10.7298	0.081814	0.094547	0.46698
MSTRG.11295.5	0	0	0	0	0	0	0	0	0	0	0.064623	0.017972	0.058416	0.039956	0.113199	0.012301	0.022361	0.051727	0.025792	0.041648	0.044507	0.052095	0.049739	0.02762	0.112985	0.018613	0.098448	0.065585	0.207986	0.114076	0	0.048145	3.71315	0	0	0.008589	0	0.004442	0	0	0.017384	0
MSTRG.11295.6	2.47717	4.21337	5.79023	5.8499	8.29831	9.43781	6.34227	2.12743	6.21293	2.68714	1.68619	1.75182	2.57754	2.97883	4.30398	0.721648	2.92197	0.734755	1.82982	2.7352	1.06526	2.53047	1.66434	3.16043	1.06385	0.979122	1.52957	1.36752	0.940105	1.89994	2.64944	5.88575	8.45203	1.63249	0.964441	0.865389	2.26403	4.59853	8.84372	2.15609	1.84094	1.74661
MSTRG.11295.7	0	0	0	0	0	0	0	0	0	0	5.5825	0	7.30914	0.002596	0.009374	0.04072	0.013128	5.93254	0.000501	0.009348	0	0	0.014774	0	0.000246	3.15771	0.000129	0.010255	5.75355	0.005237	0.493446	16.3718	15.9415	0.003296	0	0.828135	0.025023	0.024841	0	0	0	0
MSTRG.11295.8	0.756805	0.522867	0	0.64473	0.183937	0.305303	0.220376	0.30381	0.134195	7.63407	11.5732	15.0486	8.86834	10.3039	10.917	10.2718	8.02596	4.39963	10.2027	14.3893	6.66682	10.0711	7.57132	16.6446	3.63085	6.02339	3.08574	6.09909	4.59232	7.04706	12.5307	33.2826	36.4281	2.29887	1.08434	0.450945	11.0061	11.1809	13.1323	12.847	7.46225	6.11255
MSTRG.11297.2	0	0	0	0	0	0	0	0	0	2.50657	3.69839	0.631049	1.79741	0.951752	1.77022	0.641171	3.08938	1.68148	1.56901	2.71857	0.614849	1.41994	3.90422	4.67843	14.8144	12.989	7.40226	12.4089	7.94979	10.1668	1.35259	2.27155	2.17678	5.97896	4.84527	7.7137	2.11907	6.11012	4.16268	3.14577	0.993431	4.23241
MSTRG.11299.2	52.0644	80.9387	0	33.621	52.4949	241.545	47.0791	137.605	119.486	13.6094	60.952	19.9876	20.7094	8.28788	58.1181	21.1576	39.9931	12.5505	9.85553	21.7273	14.1954	17.5119	71.4884	59.3971	91.5427	49.1298	56.2757	67.9387	120.516	97.7435	19.318	22.6985	24.0344	41.0501	44.1502	85.2515	36.8968	52.1628	47.0024	7.77705	23.2954	10.1633
MSTRG.113.4	0.63336	0	0.132854	3.97647	4.31671	6.42059	0.624872	0.68786	1.84046	0.300179	1.88168	0.049471	0.071413	0.096549	0.660197	0.060883	0.290909	0.150306	0.058254	0.203781	0.068816	0.182547	0.440939	0.115539	5.8294	5.1048	0.740236	4.55193	1.57449	3.47506	0.084614	0.162049	0.098688	2.19436	2.62078	3.50803	0.184149	0.126905	0.208634	0.264202	0.092296	2.40499
MSTRG.1130.1	8.14303	1.75535	0.798625	3.37038	0.411867	2.42831	4.20464	2.66974	6.41361	7.59184	14.4795	4.91607	5.6373	10.3147	10.6581	5.68571	7.05414	4.75887	3.47339	5.91299	4.24546	5.85869	5.45872	10.0004	19.5014	12.8632	14.6511	16.7037	17.2203	13.7747	0.99484	1.45365	2.7744	3.12232	4.92411	4.51408	4.03027	2.04867	3.79244	4.15871	4.6742	4.84571
MSTRG.11307.3	10.7557	8.95665	10.587	29.6738	9.41133	0	51.923	40.8918	24.9389	48.5357	86.6784	47.2833	45.956	42.9448	59.9453	45.7511	59.5282	29.8776	37.3412	74.8491	38.255	43.7544	81.5485	85.6407	249.302	224.342	131.424	137.701	138.332	198.884	10.4259	14.6779	12.7998	63.1486	53.3609	28.4051	28.9118	47.742	33.9481	34.7178	27.2277	34.8869
MSTRG.11307.4	10.5721	0	0.459759	43.0869	0	85.3356	0	0.416017	0	18.1354	35.0696	15.5946	16.3629	13.8497	20.1121	13.7168	14.9097	14.0753	8.6881	21.5692	10.2266	12.5812	29.514	28.6783	78.045	67.9321	56.1376	71.308	65.1384	74.7336	4.51655	5.05277	5.90808	25.2382	28.3399	30.9047	21.334	23.0323	27.738	7.24817	6.06875	14.6677
MSTRG.11307.5	0	25.1312	19.8617	0	93.0443	12.7579	12.3423	0	32.06	4.74311	6.82644	3.56624	3.54573	4.18839	4.74776	3.66628	3.61226	2.88721	3.84248	4.62561	2.48347	3.37768	5.94085	5.60388	15.2614	16.7985	11.1795	7.29427	14.522	16.3371	0.716921	2.73206	2.27465	4.97644	9.1845	6.50499	2.83501	7.19213	4.62372	2.76023	1.80601	3.15942
MSTRG.11307.6	0	0	0	0	0	0	0	0	0	0	0.177744	0.27262	0	0.255611	0	0	0.361267	0	0.076961	0.812913	0	0	0	0.211697	1.1065	0	0.535699	0.52082	0.228015	1.01074	0	0	0	2.29221	1.70725	1.42978	1.70283	1.66889	1.40372	0	0	0
MSTRG.11310.1	1.21955	2.54355	0.787856	14.6861	19.9698	23.5039	8.16193	5.75951	8.71012	1.93339	3.94045	1.07285	1.58053	1.13439	2.56759	1.25086	3.24096	1.54963	1.1233	2.66036	0.851564	1.75015	3.15088	2.10895	11.0292	11.8551	6.38182	14.9309	5.25055	11.1559	0.537919	0.37898	0.767517	5.49076	5.56913	5.68012	0.909664	2.88901	2.47229	1.36924	0.766706	2.06671
MSTRG.11311.2	0	0	0	0	0	18.2892	0	0	0	8.73695	14.5798	7.05746	7.41679	9.87824	9.09891	7.01288	12.2713	7.55965	8.88885	11.9714	9.35558	11.6383	14.5217	14.8203	25.7536	28.7445	26.3625	20.7947	21.2376	22.8038	3.30772	4.34354	4.93846	23.7682	17.5518	14.0141	11.4665	13.9458	16.0693	7.54711	8.55453	13.1261
MSTRG.11314.2	0	0	0	78.3932	138.541	309.781	109.669	39.4942	126.153	66.1314	159.699	43.3808	34.8097	45.4939	40.122	35.8886	55.5171	30.7356	28.2833	70.8588	46.5536	36.8931	77.447	72.616	193.958	196.555	151.619	173.447	159.794	146.274	36.9584	35.2413	43.3268	64.2027	123.78	54.3482	75.2237	73.3528	90.9755	59.4699	30.858	29.858
MSTRG.11314.3	27.7374	52.8348	37.5728	59.0923	82.3333	0	29.9088	0	0	18.3316	31.8409	10.1569	20.2025	19.2618	15.7814	15.3826	19.8905	12.6979	10.0978	21.9857	14.2232	21.0879	30.9088	77.022	62.3433	108.055	57.9687	73.7375	45.4075	55.4274	24.6126	63.7379	68.3215	111.428	74.5139	95.233	238.3	235.713	236.525	38.5304	26.3627	37.8589
MSTRG.11315.2	0	0	1.45112	0	0	0	0	0	0	12.7218	1.01452	1.68044	0	34.5434	2.9784	0.223261	1.03734	0	0.8622	9.9066	10.0646	36.5367	64.1147	84.091	231.225	162.332	171.655	88.0559	106.678	166.051	5.16345	7.59638	8.81387	63.5494	3.16212	10.0469	35.2358	26.9579	39.1092	36.9141	23.7679	0
MSTRG.11316.1	0	0	0	0	0	0	0	0	0	0.091169	0.346974	0.080201	0.278839	0.154847	0.048789	0.374933	0.156968	0.078905	0.051393	0	0.238938	0.120782	0.289409	0.467201	1.29356	0.992852	0.68225	0.741042	0	1.84989	0.501125	0.357134	0.805959	2.54987	4.89014	3.80263	1.94592	3.01048	4.63741	1.71417	1.08071	0.93232
MSTRG.11317.1	13.0669	0	0	0	0	15.7942	0	0	0	0.671081	1.56196	0	0	0.283819	0.603781	0	0.408508	0	0.166289	0.670055	0.152654	0	0.671058	0.910422	2.62746	1.41621	1.38329	6.5325	7.13601	4.76536	0.520096	0.334889	0	4.98572	1.44913	6.95309	3.66217	1.82487	3.58476	0	0.219182	0.871388
MSTRG.1132.1	16.0106	17.8496	10.4297	65.7224	50.5925	53.6192	32.2603	32.3449	37.8259	9.34044	16.9337	5.35157	7.37462	9.32241	10.5957	6.55858	13.1701	6.66984	7.0793	11.5372	10.283	9.91801	11.1682	19.8064	34.5908	25.7921	26.73	25.9502	30.2974	29.8335	8.92364	0	26.9017	21.6722	0	0	24.998	0	58.378	14.8906	13.2691	17.1395
MSTRG.11324.1	2.17544	1.44105	15.6955	4.11002	68.5976	62.9158	55.556	39.5983	0.971489	5.71133	7.30124	6.06639	6.99519	4.16841	6.02949	6.99295	4.39148	2.57322	5.38695	7.27633	3.40801	4.03026	5.57876	3.3725	17.8372	16.6907	8.28215	10.0916	8.94951	10.7264	1.04331	1.60853	2.28433	3.49316	3.27601	3.10344	2.16567	5.8342	4.60498	6.79518	3.68455	1.44458
MSTRG.11324.2	0	3.88377	0	7.91471	4.06291	47.9305	0	0	0	4.41737	7.52965	5.01106	1.79814	2.95491	5.35169	1.94661	4.26912	2.42291	2.78673	6.72641	2.08514	3.47556	4.74146	3.52448	16.6519	14.4305	9.00969	10.9222	9.12663	9.68409	0.511578	0.619034	0.28107	3.93481	4.54398	0.973479	2.05839	3.52753	2.46276	0.202832	1.93484	1.08009
MSTRG.11324.3	5.1722	10.2502	4.05065	34.0782	31.1431	8.11201	10.6293	5.27312	28.5312	2.67402	10.21	3.60404	2.85627	1.98278	4.63307	1.5535	3.72776	2.08723	3.06773	5.66542	2.39518	4.50819	7.34381	5.10021	21.4815	25.2796	10.2363	17.8597	13.6575	18.4298	0.730801	0.809353	1.31112	4.77959	4.22973	4.35813	2.09936	3.89232	2.96646	3.59504	3.62513	4.09831
MSTRG.11324.4	0	0	0	65.3871	0.244797	16.2566	0	0	0	1.65837	8.25367	1.89695	1.51137	1.48483	2.765	0.927836	2.00057	1.15347	0.97814	2.63569	1.50342	2.51228	5.02712	4.63687	20.7417	12.4878	11.5537	13.4864	21.1047	18.8451	1.24033	1.21327	1.22808	8.31515	13.28	13.4637	3.01755	3.91987	4.52351	2.19035	1.47757	6.46502
MSTRG.11324.5	0	0	0	0	0	0	0	0	0	0	0	0	0	0	0	0	0	0	0	0	0	0	0	0	0	0	0	0	0	0	0	0	0	11.7	0	0	0	0	0	0	0	0
MSTRG.11324.6	0	0	0	0	13.9972	0	0	2.3146	6.64924	7.08845	16.3212	6.15571	7.20841	4.94363	9.27748	7.95306	13.5784	5.52483	5.52439	12.367	4.33913	8.80535	21.1115	13.3493	76.4282	44.9873	36.6669	45.5559	51.8896	39.6401	1.07963	1.29222	0.686934	20.0346	19.6674	13.4456	9.12746	6.19118	6.7595	3.87106	2.97511	9.7475
MSTRG.11324.7	0	0	0	0	0	0	0	0	0	0.377612	1.03975	0.690968	0.24333	0.145933	0.500555	0.390788	0.909465	0.547954	0.690807	1.25889	0.30279	0.449348	1.84017	0.876891	5.4571	3.18513	3.46457	5.31823	4.74441	2.99938	0	0	0.101976	1.38176	0.947468	1.64667	0.857665	0.891862	1.09303	0.349242	0.390611	0.592869
MSTRG.11324.8	0	0	0	0	0	0	0	0	0	0.551691	0.982448	0.765036	0.216821	0.13782	0.930294	0.656379	1.34478	0.642907	0.592099	1.14247	0.347626	0.823059	2.64002	0.986959	4.75839	3.34739	4.02388	4.73486	4.83861	2.52566	0	0.00766	0.147411	4.59716	1.12006	1.55811	4.44686	3.98889	3.05237	0.175054	0.116002	0.89976
MSTRG.11326.1	8.12133	13.318	9.92772	67.0048	12.3756	49.7967	4.18658	24.7	1.2352	2.59822	8.04503	0.785414	1.65279	0.940239	1.31046	0.85925	2.32385	0.997555	2.19494	5.17195	3.00142	1.97465	4.70062	4.39302	8.6932	18.6547	16.1692	22.4414	17.7903	20.6426	0.429679	0.612667	0.612387	4.78517	3.99439	3.88335	1.80671	5.01935	5.19232	2.07204	2.62406	6.8536
MSTRG.11332.1	6.05464	5.5278	1.31449	30.8619	33.0012	32.6407	18.8281	8.82506	13.5679	0	1.54116	0.846457	0.613693	0.330066	1.03614	1.29041	0.864786	0	0.579611	0.240117	1.0579	0.999855	0.72407	1.71592	8.97685	3.72155	4.22849	6.78118	6.93965	7.35288	0.257476	0	0.222665	7.89143	6.04924	4.95104	1.48622	0.441821	0.175773	0.719451	1.15121	1.38587
MSTRG.11332.2	0	0	5.37374	0	0	0	0	0	0	0.861488	2.97379	0.374677	0.666237	0.896019	0.815822	0.173441	0.721807	0.549962	0.5524	1.04585	0.330456	1.67869	2.16696	1.50689	7.11341	9.15614	2.67484	5.08965	4.03638	5.43538	0.124405	0.439405	0.005378	3.86125	5.74923	1.91652	0.20547	1.06721	1.88323	0.781806	0.562957	1.24082
MSTRG.11336.1	3.01861	3.00087	10.8634	34.6217	22.7209	29.9031	14.9445	4.73855	8.29666	2.53943	6.3136	1.85288	3.34789	4.93581	3.51586	4.04692	3.89296	4.50228	2.68597	6.25518	4.58041	5.05068	7.07188	7.88527	9.023	9.10023	11.091	11.3127	12.0437	10.7525	1.2287	1.1162	1.16437	3.53685	3.93976	4.90251	2.89262	2.68901	4.05628	3.76285	3.21063	3.2015
MSTRG.11336.2	0	0	0	0	0	0	0	0	0	0	0	0	0	0	0	0	0	0	0	0	0.094073	0	0	0	0	0	0	0	0	0	0	0	0	0	0.132016	0	0	0.712203	0	0	0	0
MSTRG.11338.2	20.7541	7.23387	14.7375	13.291	13.1481	10.5937	28.4361	1.86137	25.722	7.5004	9.08508	4.63011	7.87906	13.3408	8.75009	6.3597	12.6317	11.4045	5.18039	13.9192	13.3452	8.58348	15.5751	22.7105	9.84517	7.88496	10.4591	11.1792	12.3524	11.7436	2.97286	5.69512	5.87414	1.52498	1.10546	2.86964	0.356315	0.817272	0.427518	5.98503	3.45388	2.76096
MSTRG.11340.1	5.25062	6.30573	5.9806	16.9394	16.0171	16.9199	15.6331	8.97431	9.8703	2.75073	5.2949	1.98046	2.75751	2.34886	2.66591	1.33969	3.12003	2.0189	3.03869	3.75795	2.86657	3.15327	4.11358	3.21556	7.40039	8.35556	6.97605	7.40207	6.70716	10.4065	1.07066	0.850422	1.18403	5.771	3.51556	1.87912	4.0469	5.74364	4.79292	4.14107	2.11262	2.80755
MSTRG.11340.2	0	0.471223	0	0	0.613517	0	0	0.173859	0	2.53908	3.83957	2.38938	1.34006	1.62832	2.16377	3.05829	3.39175	2.00239	1.17989	3.38492	0.883681	1.78943	3.52435	4.17344	8.5303	5.85106	5.48261	5.14418	9.86489	4.41954	0.958905	1.5032	0.528386	3.71248	3.60214	2.50289	4.52034	5.2918	5.41036	0.445442	1.9605	2.44421
MSTRG.11347.2	12.2401	12.099	0	0	38.5832	61.5912	41.3403	17.0509	27.5059	12.9049	21.2805	14.3887	9.89544	7.42794	13.906	16.9671	13.4347	11.8595	12.5592	15.1038	7.78725	14.2534	20.203	16.6058	56.675	47.6739	55.866	76.4709	49.0886	43.4561	4.51686	5.69471	5.79786	29.0586	23.023	22.1127	10.5413	14.8736	19.8014	4.48455	3.39508	4.44831
[truncated: 62,222 more rows]

## Sheet: filtered_expression(FPKM ≥ 2)
	PL1	PL2	PL3	DP4	DP5	DP6	IN1	IN2	IN3	EL1	EL2	EL3	EL4	EL5	EL6	EL7	LL4	LL5	LL6	LL7	LL8	LL9	LL10	DP7	DP8	DP9	DP10	DP11	DP12	DP13	LL1	LL2	LL3	DP1	DP2	DP3	LG1	LG2	LG3	EL8	PL4	LL11
[truncated: 18,615 more rows]

## Sheet: filtered_expression(FPKM ≥0.5)
ID	EL1	EL2	EL3	EL4	EL5	EL6	EL7	EL8	PL1	PL2	PL3	PL4	LL1	LL2	LL3	LL4	LL5	LL6	LL7	LL8	LL9	LL10	LL11	DP1	DP2	DP3	DP4	DP5	DP6	DP7	DP8	DP9	DP10	DP11	DP12	DP13	IN1	IN2	IN3	LG1	LG2	LG3
[truncated: 26,093 more rows]
