# Supplementary material for: Transcriptome Analysis of Goat Mammary Gland Tissue Reveals the Adaptive Strategies and Molecular Mechanisms of Lactation and Involution
Source: Int J Mol Sci. 2022 Nov 20;23(22):14424. doi: 10.3390/ijms232214424 (PMC9693614; doi:10.3390/ijms232214424)
Supplement: Supplementary file 1 [file ijms-23-14424-s001.zip › Table S4.xlsx]

## Sheet: Sheet1
EL	PL	LL	DP	IN	LG
XM_005681721.2(CSN2)	XM_005681721.2(CSN2)	XM_005681721.2(CSN2)	MSTRG.14172.1(MSTRG.14172)	XM_005681721.2(CSN2)	MSTRG.14172.1(MSTRG.14172)
NM_001285587.1(CSN3)	NM_001285587.1(CSN3)	NM_001285587.1(CSN3)	MSTRG.6747.9(MSTRG.6747)	XM_018054688.1(PAEP)	MSTRG.6739.9(MSTRG.6739)
MSTRG.7766.7(MSTRG.7766)	NM_001285635.1(LALBA)	MSTRG.6747.3(MSTRG.6747)	MSTRG.6747.3(MSTRG.6747)	NM_001285587.1(CSN3)	MSTRG.6747.3(MSTRG.6747)
NM_001285585.1(CSN1S2)	XM_018054688.1(PAEP)	NM_001285585.1(CSN1S2)	XM_005681721.2(CSN2)	NM_001285635.1(LALBA)	MSTRG.6747.9(MSTRG.6747)
NM_001285539.1(PAEP)	NM_001285585.1(CSN1S2)	MSTRG.7766.7(MSTRG.7766)	NM_001285587.1(CSN3)	NM_001285585.1(CSN1S2)	MSTRG.6747.4(MSTRG.6747)
NM_001285635.1(LALBA)	MSTRG.4188.10(MSTRG.4188)	MSTRG.6739.9(MSTRG.6739)	MSTRG.6739.6(MSTRG.6739)	NM_001285695.1(CSN1S1)	MSTRG.6739.6(MSTRG.6739)
MSTRG.6747.3(MSTRG.6747)	NM_001285626.1(GLYCAM1)	NM_001285635.1(LALBA)	MSTRG.6739.9(MSTRG.6739)	XM_013964699.2(CSN2)	MSTRG.6851.1(MSTRG.6851)
NM_001285695.1(CSN1S1)	MSTRG.6747.5(MSTRG.6747)	MSTRG.14172.1(MSTRG.14172)	MSTRG.7766.7(MSTRG.7766)	NM_001285626.1(GLYCAM1)	MSTRG.6747.5(MSTRG.6747)
MSTRG.4189.1(MSTRG.4189)	MSTRG.6747.4(MSTRG.6747)	NM_001285539.1(PAEP)	NM_001285609.1(FTH1)	XM_018049133.1(CSN1S1)	MSTRG.6739.4(MSTRG.6739)
NM_001285626.1(GLYCAM1)	XM_013964675.2(CSN1S2)	MSTRG.6739.3(MSTRG.6739)	MSTRG.6851.1(MSTRG.6851)	XM_013964675.2(CSN1S2)	MSTRG.6747.19(MSTRG.6747)
MSTRG.4189.2(MSTRG.4189)	XM_013964699.2(CSN2)	NM_001285626.1(GLYCAM1)	NM_001285539.1(PAEP)	XM_018049132.1(CSN1S1)	MSTRG.8217.1(MSTRG.8217)
MSTRG.7766.6(MSTRG.7766)	XM_018049128.1(CSN1S1)	MSTRG.6747.9(MSTRG.6747)	NM_001285637.1(LOC100860781)	MSTRG.7766.6(MSTRG.7766)	NM_001285539.1(PAEP)
MSTRG.14172.1(MSTRG.14172)	MSTRG.14172.1(MSTRG.14172)	MSTRG.4189.1(MSTRG.4189)	MSTRG.17796.1(MSTRG.17796)	MSTRG.142.1(MSTRG.142)	XM_005681721.2(CSN2)
XM_018049127.1(CSN1S1)	MSTRG.6739.4(MSTRG.6739)	NM_001285695.1(CSN1S1)	MSTRG.142.1(MSTRG.142)	MSTRG.6655.1(MSTRG.6655)	MSTRG.6747.13(MSTRG.6747)
MSTRG.17330.1(MSTRG.17330)	XM_018049127.1(CSN1S1)	MSTRG.6747.4(MSTRG.6747)	XM_018056766.1(TPT1)	XM_018049129.1(CSN1S1)	MSTRG.7766.6(MSTRG.7766)
MSTRG.4188.35(MSTRG.4188)	MSTRG.6739.6(MSTRG.6739)	MSTRG.7766.1(MSTRG.7766)	XM_018053578.1(RPLP1)	XM_013964504.2(SPP1)	MSTRG.6739.8(MSTRG.6739)
XM_018049128.1(CSN1S1)	MSTRG.6739.9(MSTRG.6739)	MSTRG.4189.2(MSTRG.4189)	NM_001287029.1(TMSB4X)	MSTRG.5855.1(MSTRG.5855)	MSTRG.6739.3(MSTRG.6739)
XM_013964673.2(CSN1S2)	MSTRG.6739.12(MSTRG.6739)	MSTRG.6739.4(MSTRG.6739)	XM_018053818.1(B2M)	XM_005682426.3(RPS28)	XM_005678553.3(RPS8)
MSTRG.6739.3(MSTRG.6739)	XM_018049129.1(CSN1S1)	MSTRG.6739.6(MSTRG.6739)	MSTRG.17330.1(MSTRG.17330)	NM_001285609.1(FTH1)	XM_005684428.3(EEF1A1)
MSTRG.6747.4(MSTRG.6747)	XM_018049130.1(CSN1S1)	MSTRG.7766.6(MSTRG.7766)	MSTRG.1918.1(MSTRG.1918)	MSTRG.4189.2(MSTRG.4189)	XM_005693732.2(RPL23)
