# Supplementary material for: Transcriptome Analysis of Goat Mammary Gland Tissue Reveals the Adaptive Strategies and Molecular Mechanisms of Lactation and Involution
Source: Int J Mol Sci. 2022 Nov 20;23(22):14424. doi: 10.3390/ijms232214424 (PMC9693614; doi:10.3390/ijms232214424)
Supplement: Supplementary file 1 [file ijms-23-14424-s001.zip › Table S5.xlsx]

## Sheet: all_module_notes
Transcript_ID	module_color	module_Name
MIR25	black	T
MSTRG.10040.7	black	T
MSTRG.10063.7	black	T
MSTRG.10179.18	black	T
MSTRG.10179.38	black	T
MSTRG.1029.2	black	T
MSTRG.10357.1	black	T
MSTRG.10426.19	black	T
MSTRG.10426.26	black	T
MSTRG.10426.28	black	T
MSTRG.10506.1	black	T
MSTRG.10509.1	black	T
MSTRG.10519.9	black	T
MSTRG.1062.3	black	T
MSTRG.10634.5	black	T
MSTRG.1069.1	black	T
MSTRG.10712.1	black	T
MSTRG.10742.1	black	T
MSTRG.10989.1	black	T
MSTRG.11027.7	black	T
MSTRG.11039.1	black	T
MSTRG.11042.2	black	T
MSTRG.1107.4	black	T
MSTRG.11090.5	black	T
MSTRG.11108.5	black	T
MSTRG.11134.1	black	T
MSTRG.11137.2	black	T
MSTRG.11185.1	black	T
MSTRG.11231.2	black	T
MSTRG.1127.6	black	T
MSTRG.11393.2	black	T
MSTRG.11404.2	black	T
MSTRG.11516.3	black	T
MSTRG.11518.1	black	T
MSTRG.11518.2	black	T
MSTRG.11519.1	black	T
MSTRG.11526.4	black	T
MSTRG.11571.1	black	T
MSTRG.11611.1	black	T
MSTRG.11614.3	black	T
MSTRG.11625.3	black	T
MSTRG.11630.2	black	T
MSTRG.11630.3	black	T
MSTRG.11649.11	black	T
MSTRG.11656.2	black	T
MSTRG.11667.1	black	T
MSTRG.117.1	black	T
MSTRG.1170.7	black	T
MSTRG.11709.2	black	T
MSTRG.11714.3	black	T
MSTRG.11754.1	black	T
MSTRG.11823.2	black	T
MSTRG.11852.1	black	T
MSTRG.11955.1	black	T
MSTRG.11957.1	black	T
MSTRG.12121.2	black	T
MSTRG.12147.7	black	T
MSTRG.12149.1	black	T
MSTRG.12197.3	black	T
MSTRG.12203.1	black	T
MSTRG.12210.3	black	T
MSTRG.12232.1	black	T
MSTRG.12301.4	black	T
MSTRG.12442.4	black	T
MSTRG.12534.12	black	T
MSTRG.12568.1	black	T
MSTRG.12585.3	black	T
MSTRG.12588.1	black	T
MSTRG.12595.2	black	T
MSTRG.12603.1	black	T
MSTRG.12629.2	black	T
MSTRG.12666.1	black	T
MSTRG.12691.1	black	T
MSTRG.127.1	black	T
MSTRG.1282.2	black	T
MSTRG.1283.1	black	T
MSTRG.12863.11	black	T
MSTRG.12863.8	black	T
MSTRG.12880.1	black	T
MSTRG.12920.1	black	T
MSTRG.1314.8	black	T
MSTRG.13159.1	black	T
MSTRG.13313.1	black	T
MSTRG.13338.7	black	T
MSTRG.13357.1	black	T
MSTRG.1346.1	black	T
MSTRG.13472.8	black	T
MSTRG.13523.6	black	T
MSTRG.13544.6	black	T
MSTRG.13545.2	black	T
MSTRG.13615.2	black	T
MSTRG.13646.3	black	T
MSTRG.13673.2	black	T
MSTRG.13735.4	black	T
MSTRG.13847.1	black	T
MSTRG.13898.1	black	T
MSTRG.1393.4	black	T
MSTRG.14059.1	black	T
MSTRG.14059.2	black	T
MSTRG.14060.1	black	T
MSTRG.14060.10	black	T
MSTRG.14060.15	black	T
MSTRG.14060.6	black	T
MSTRG.14074.9	black	T
MSTRG.14075.2	black	T
MSTRG.14075.3	black	T
MSTRG.14076.13	black	T
MSTRG.14076.3	black	T
MSTRG.14099.3	black	T
MSTRG.14099.4	black	T
MSTRG.14099.8	black	T
MSTRG.14108.1	black	T
MSTRG.14109.1	black	T
MSTRG.14143.4	black	T
MSTRG.14167.4	black	T
MSTRG.14167.7	black	T
MSTRG.14168.1	black	T
MSTRG.14213.5	black	T
MSTRG.14256.1	black	T
MSTRG.14257.10	black	T
MSTRG.14259.1	black	T
MSTRG.143.2	black	T
MSTRG.14300.7	black	T
MSTRG.14313.1	black	T
MSTRG.14340.8	black	T
MSTRG.14352.5	black	T
MSTRG.14352.6	black	T
MSTRG.14362.31	black	T
MSTRG.14364.9	black	T
MSTRG.14381.1	black	T
MSTRG.14416.1	black	T
MSTRG.1442.1	black	T
MSTRG.14426.4	black	T
MSTRG.14531.4	black	T
MSTRG.14533.1	black	T
MSTRG.14533.3	black	T
MSTRG.14534.1	black	T
MSTRG.14535.1	black	T
MSTRG.14548.1	black	T
MSTRG.14565.2	black	T
MSTRG.14573.3	black	T
MSTRG.14748.1	black	T
MSTRG.1483.2	black	T
MSTRG.1489.3	black	T
MSTRG.14890.6	black	T
MSTRG.14939.9	black	T
MSTRG.14992.1	black	T
MSTRG.15001.8	black	T
MSTRG.15199.3	black	T
MSTRG.15199.4	black	T
MSTRG.15432.1	black	T
MSTRG.15444.1	black	T
MSTRG.15477.1	black	T
MSTRG.15677.10	black	T
MSTRG.1570.1	black	T
MSTRG.15722.4	black	T
MSTRG.15732.1	black	T
MSTRG.15752.2	black	T
MSTRG.15891.2	black	T
MSTRG.15937.2	black	T
MSTRG.15946.10	black	T
MSTRG.15957.1	black	T
MSTRG.15976.1	black	T
MSTRG.15996.2	black	T
MSTRG.16086.3	black	T
MSTRG.16118.1	black	T
MSTRG.16130.1	black	T
MSTRG.16153.1	black	T
MSTRG.16171.11	black	T
MSTRG.16171.21	black	T
MSTRG.16171.3	black	T
MSTRG.16171.6	black	T
MSTRG.16181.6	black	T
MSTRG.16202.2	black	T
MSTRG.16254.2	black	T
MSTRG.16334.3	black	T
MSTRG.16382.1	black	T
MSTRG.16444.3	black	T
MSTRG.16639.9	black	T
MSTRG.16644.1	black	T
MSTRG.16698.1	black	T
MSTRG.1672.5	black	T
MSTRG.16725.5	black	T
MSTRG.16752.2	black	T
MSTRG.1676.2	black	T
MSTRG.16935.5	black	T
MSTRG.16985.1	black	T
MSTRG.17007.2	black	T
MSTRG.17137.13	black	T
MSTRG.17187.8	black	T
MSTRG.17200.24	black	T
MSTRG.17200.26	black	T
MSTRG.17200.27	black	T
MSTRG.17210.2	black	T
MSTRG.17231.1	black	T
MSTRG.17275.1	black	T
MSTRG.1733.5	black	T
MSTRG.17370.1	black	T
MSTRG.17370.2	black	T
MSTRG.17373.1	black	T
MSTRG.17375.4	black	T
MSTRG.17377.1	black	T
MSTRG.17377.2	black	T
MSTRG.17538.4	black	T
MSTRG.17539.2	black	T
MSTRG.17556.4	black	T
MSTRG.1764.1	black	T
MSTRG.17693.1	black	T
MSTRG.17693.3	black	T
MSTRG.17693.9	black	T
MSTRG.17721.1	black	T
MSTRG.17723.4	black	T
MSTRG.17724.14	black	T
MSTRG.17884.1	black	T
MSTRG.1793.7	black	T
MSTRG.17943.1	black	T
MSTRG.17944.5	black	T
MSTRG.1807.1	black	T
MSTRG.1842.1	black	T
MSTRG.1868.5	black	T
MSTRG.1878.2	black	T
MSTRG.1953.16	black	T
MSTRG.1953.26	black	T
MSTRG.1953.5	black	T
MSTRG.2024.1	black	T
MSTRG.2110.4	black	T
MSTRG.2134.1	black	T
MSTRG.220.1	black	T
MSTRG.2203.8	black	T
MSTRG.2306.1	black	T
MSTRG.2308.1	black	T
MSTRG.2363.3	black	T
MSTRG.2448.2	black	T
MSTRG.2461.1	black	T
MSTRG.2501.6	black	T
MSTRG.2530.2	black	T
MSTRG.2571.1	black	T
MSTRG.2638.2	black	T
MSTRG.2760.5	black	T
MSTRG.2866.10	black	T
MSTRG.2880.1	black	T
MSTRG.2997.3	black	T
MSTRG.3001.1	black	T
MSTRG.308.5	black	T
MSTRG.3147.4	black	T
MSTRG.3263.5	black	T
MSTRG.3338.2	black	T
MSTRG.3341.2	black	T
MSTRG.3345.1	black	T
MSTRG.3345.3	black	T
MSTRG.3352.1	black	T
MSTRG.3358.1	black	T
MSTRG.3431.2	black	T
MSTRG.345.1	black	T
MSTRG.3476.1	black	T
MSTRG.3479.1	black	T
MSTRG.3499.5	black	T
MSTRG.3561.1	black	T
MSTRG.359.1	black	T
MSTRG.3595.2	black	T
MSTRG.3595.3	black	T
MSTRG.3599.3	black	T
MSTRG.3601.1	black	T
MSTRG.3602.1	black	T
MSTRG.3622.1	black	T
MSTRG.3684.3	black	T
MSTRG.3723.1	black	T
MSTRG.3836.2	black	T
MSTRG.3907.2	black	T
MSTRG.3922.1	black	T
MSTRG.3953.3	black	T
MSTRG.3998.1	black	T
MSTRG.4010.2	black	T
MSTRG.4062.5	black	T
MSTRG.4127.4	black	T
MSTRG.4305.6	black	T
MSTRG.4485.1	black	T
MSTRG.4510.2	black	T
MSTRG.4530.3	black	T
MSTRG.454.4	black	T
MSTRG.4625.9	black	T
MSTRG.4811.1	black	T
MSTRG.4848.6	black	T
MSTRG.485.1	black	T
MSTRG.4854.2	black	T
MSTRG.4890.1	black	T
MSTRG.4896.1	black	T
MSTRG.4897.9	black	T
MSTRG.5078.1	black	T
MSTRG.5088.4	black	T
MSTRG.510.1	black	T
MSTRG.5136.4	black	T
MSTRG.5138.3	black	T
MSTRG.5157.1	black	T
MSTRG.5157.2	black	T
MSTRG.5157.3	black	T
MSTRG.5338.3	black	T
MSTRG.5509.7	black	T
MSTRG.5523.6	black	T
MSTRG.5523.7	black	T
MSTRG.5536.1	black	T
MSTRG.5646.6	black	T
MSTRG.5773.3	black	T
MSTRG.5787.1	black	T
MSTRG.5837.5	black	T
MSTRG.5892.4	black	T
MSTRG.5896.1	black	T
MSTRG.5936.1	black	T
MSTRG.5945.5	black	T
MSTRG.5977.2	black	T
MSTRG.5997.1	black	T
MSTRG.6027.2	black	T
MSTRG.6044.1	black	T
MSTRG.6077.2	black	T
MSTRG.6104.13	black	T
MSTRG.6136.2	black	T
MSTRG.6218.3	black	T
MSTRG.6225.2	black	T
MSTRG.6266.21	black	T
MSTRG.6275.1	black	T
MSTRG.6275.2	black	T
MSTRG.6396.1	black	T
MSTRG.6455.1	black	T
MSTRG.65.6	black	T
MSTRG.6614.2	black	T
MSTRG.6637.2	black	T
MSTRG.6719.2	black	T
MSTRG.6732.1	black	T
MSTRG.6755.1	black	T
MSTRG.6775.13	black	T
MSTRG.6790.1	black	T
MSTRG.6896.14	black	T
MSTRG.6952.5	black	T
MSTRG.6962.1	black	T
MSTRG.7019.8	black	T
MSTRG.7347.2	black	T
MSTRG.7384.6	black	T
MSTRG.7389.1	black	T
MSTRG.7481.7	black	T
MSTRG.7485.1	black	T
MSTRG.7541.1	black	T
MSTRG.7542.1	black	T
MSTRG.7572.8	black	T
MSTRG.7578.2	black	T
MSTRG.7615.9	black	T
MSTRG.7634.1	black	T
MSTRG.7694.2	black	T
MSTRG.7701.1	black	T
MSTRG.779.15	black	T
MSTRG.7811.2	black	T
MSTRG.7854.10	black	T
MSTRG.7891.3	black	T
MSTRG.7928.1	black	T
MSTRG.7939.2	black	T
MSTRG.7967.1	black	T
MSTRG.7975.7	black	T
MSTRG.8026.5	black	T
MSTRG.8068.1	black	T
MSTRG.8070.2	black	T
MSTRG.8072.1	black	T
MSTRG.8079.1	black	T
MSTRG.8091.1	black	T
MSTRG.8097.4	black	T
MSTRG.8122.5	black	T
MSTRG.8125.1	black	T
MSTRG.8211.7	black	T
MSTRG.8255.2	black	T
MSTRG.8266.2	black	T
MSTRG.840.3	black	T
MSTRG.8577.2	black	T
MSTRG.8583.16	black	T
MSTRG.8620.11	black	T
MSTRG.8620.3	black	T
MSTRG.8664.1	black	T
MSTRG.8687.2	black	T
MSTRG.8739.3	black	T
MSTRG.8745.2	black	T
MSTRG.8745.6	black	T
MSTRG.8746.3	black	T
MSTRG.8793.1	black	T
MSTRG.8793.3	black	T
MSTRG.8838.3	black	T
MSTRG.8854.2	black	T
MSTRG.8912.3	black	T
MSTRG.8997.5	black	T
MSTRG.9069.5	black	T
MSTRG.9139.1	black	T
MSTRG.9149.5	black	T
MSTRG.9246.1	black	T
MSTRG.9260.1	black	T
MSTRG.9301.3	black	T
MSTRG.934.17	black	T
MSTRG.9375.15	black	T
MSTRG.9375.3	black	T
MSTRG.9447.5	black	T
MSTRG.9499.1	black	T
MSTRG.9503.1	black	T
MSTRG.9532.9	black	T
MSTRG.9582.1	black	T
MSTRG.9582.2	black	T
MSTRG.9583.1	black	T
MSTRG.9601.1	black	T
MSTRG.9696.1	black	T
MSTRG.9700.1	black	T
MSTRG.9733.8	black	T
MSTRG.9740.1	black	T
MSTRG.9744.1	black	T
MSTRG.9769.4	black	T
MSTRG.9799.2	black	T
MSTRG.9810.1	black	T
MSTRG.9850.9	black	T
MSTRG.9900.1	black	T
MSTRG.9970.4	black	T
MSTRG.9978.2	black	T
NM_001285545.1	black	T
NM_001285640.1	black	T
NM_001285724.1	black	T
NM_001285765.1	black	T
NM_001291697.1	black	T
NM_001314204.1	black	T
NM_001314206.1	black	T
NM_001314287.1	black	T
XM_005674807.3	black	T
XM_005674942.3	black	T
XM_005675032.3	black	T
XM_005675077.3	black	T
XM_005675213.3	black	T
XM_005675222.3	black	T
XM_005675421.3	black	T
XM_005675457.3	black	T
XM_005675482.2	black	T
XM_005675536.3	black	T
XM_005675629.3	black	T
XM_005675967.3	black	T
XM_005676364.3	black	T
XM_005676621.3	black	T
XM_005676623.3	black	T
XM_005676862.3	black	T
XM_005676879.3	black	T
XM_005677123.3	black	T
XM_005677146.3	black	T
XM_005677303.3	black	T
XM_005677377.3	black	T
XM_005677615.3	black	T
XM_005677696.3	black	T
XM_005677865.3	black	T
XM_005678049.3	black	T
XM_005678090.3	black	T
XM_005678107.3	black	T
XM_005678157.3	black	T
XM_005678170.3	black	T
XM_005678250.3	black	T
XM_005678346.3	black	T
XM_005678377.3	black	T
XM_005678381.3	black	T
XM_005678419.3	black	T
XM_005678437.3	black	T
XM_005678573.3	black	T
XM_005678881.3	black	T
XM_005678922.2	black	T
XM_005679027.3	black	T
XM_005679143.3	black	T
XM_005679177.3	black	T
XM_005679788.3	black	T
XM_005679796.3	black	T
XM_005680008.3	black	T
XM_005680065.3	black	T
XM_005680210.3	black	T
XM_005680495.3	black	T
XM_005680513.3	black	T
XM_005680843.3	black	T
XM_005680868.2	black	T
XM_005680899.3	black	T
XM_005681306.3	black	T
XM_005681589.3	black	T
XM_005681656.3	black	T
XM_005681804.3	black	T
XM_005682330.3	black	T
XM_005682516.3	black	T
XM_005682634.3	black	T
XM_005683053.3	black	T
XM_005683135.3	black	T
XM_005683213.2	black	T
XM_005683427.3	black	T
XM_005683461.3	black	T
XM_005683688.3	black	T
XM_005683699.3	black	T
XM_005683704.2	black	T
XM_005683796.3	black	T
XM_005684052.3	black	T
XM_005684263.3	black	T
XM_005684283.3	black	T
XM_005684319.3	black	T
XM_005684512.3	black	T
XM_005684782.3	black	T
XM_005684899.2	black	T
XM_005685447.3	black	T
XM_005685448.3	black	T
XM_005685488.3	black	T
XM_005685651.3	black	T
XM_005685773.3	black	T
XM_005685799.3	black	T
XM_005685906.3	black	T
XM_005685924.3	black	T
XM_005686055.3	black	T
XM_005686098.2	black	T
XM_005686263.3	black	T
XM_005686347.3	black	T
XM_005686374.3	black	T
XM_005686394.3	black	T
XM_005686482.3	black	T
XM_005686492.3	black	T
XM_005686628.2	black	T
XM_005686808.3	black	T
XM_005686987.3	black	T
XM_005687205.3	black	T
XM_005687432.3	black	T
XM_005687493.3	black	T
XM_005687497.3	black	T
XM_005687655.3	black	T
XM_005687683.3	black	T
XM_005688323.3	black	T
XM_005688519.3	black	T
XM_005688549.3	black	T
XM_005689382.3	black	T
XM_005689391.3	black	T
XM_005689502.3	black	T
XM_005689846.3	black	T
XM_005689969.3	black	T
XM_005690341.3	black	T
XM_005690474.3	black	T
XM_005690886.3	black	T
XM_005690899.3	black	T
XM_005691198.3	black	T
XM_005691245.3	black	T
XM_005691281.3	black	T
XM_005691425.3	black	T
XM_005691996.3	black	T
XM_005692140.3	black	T
XM_005692341.3	black	T
XM_005692403.3	black	T
XM_005692482.3	black	T
XM_005692633.3	black	T
XM_005693137.3	black	T
XM_005693638.3	black	T
XM_005693832.3	black	T
XM_005693927.3	black	T
XM_005693941.3	black	T
XM_005693991.3	black	T
XM_005694080.3	black	T
XM_005694373.3	black	T
XM_005694535.3	black	T
XM_005694556.3	black	T
XM_005694557.3	black	T
XM_005694660.2	black	T
XM_005694697.3	black	T
XM_005694702.3	black	T
XM_005694731.3	black	T
XM_005694776.3	black	T
XM_005694804.3	black	T
XM_005694851.3	black	T
XM_005694862.3	black	T
XM_005695157.3	black	T
XM_005695242.3	black	T
XM_005695279.3	black	T
XM_005695312.3	black	T
XM_005695358.3	black	T
XM_005695544.2	black	T
XM_005695623.3	black	T
XM_005695727.2	black	T
XM_005695740.3	black	T
XM_005695755.3	black	T
XM_005695891.3	black	T
XM_005695950.3	black	T
XM_005696222.3	black	T
XM_005696229.3	black	T
XM_005696272.3	black	T
XM_005696360.3	black	T
XM_005696968.3	black	T
XM_005697012.2	black	T
XM_005697060.3	black	T
XM_005697069.3	black	T
XM_005697520.3	black	T
XM_005697841.3	black	T
XM_005698193.3	black	T
XM_005698379.3	black	T
XM_005698791.3	black	T
XM_005698796.3	black	T
XM_005698882.3	black	T
XM_005698995.3	black	T
XM_005699034.3	black	T
XM_005699127.2	black	T
XM_005699128.3	black	T
XM_005699129.3	black	T
XM_005699357.3	black	T
XM_005699496.3	black	T
XM_005699540.3	black	T
XM_005700575.3	black	T
XM_005700586.3	black	T
XM_005700602.3	black	T
XM_005701753.3	black	T
XM_005709705.3	black	T
XM_013962595.2	black	T
XM_013962632.2	black	T
XM_013962711.2	black	T
XM_013962894.2	black	T
XM_013962976.2	black	T
XM_013963470.2	black	T
XM_013963585.2	black	T
XM_013964628.2	black	T
XM_013965021.2	black	T
XM_013965615.2	black	T
XM_013965870.2	black	T
XM_013966559.2	black	T
XM_013966728.2	black	T
XM_013966744.2	black	T
XM_013966966.2	black	T
XM_013967909.2	black	T
XM_013968117.2	black	T
XM_013968259.2	black	T
XM_013969290.2	black	T
XM_013969394.2	black	T
XM_013969703.2	black	T
XM_013970253.2	black	T
XM_013971113.2	black	T
XM_013971139.2	black	T
XM_013971144.2	black	T
XM_013971151.2	black	T
XM_013971222.2	black	T
XM_013971407.2	black	T
XM_013971414.2	black	T
XM_013971714.2	black	T
XM_013971826.2	black	T
XM_013971835.2	black	T
XM_013972123.2	black	T
XM_013972268.2	black	T
XM_013973177.2	black	T
XM_013973197.2	black	T
XM_013973553.2	black	T
XM_013973741.2	black	T
XM_013974279.2	black	T
XM_013974712.2	black	T
XM_013974854.2	black	T
XM_013975589.2	black	T
XM_013976396.2	black	T
XM_018038297.1	black	T
XM_018038353.1	black	T
XM_018038774.1	black	T
XM_018038818.1	black	T
XM_018038884.1	black	T
XM_018038926.1	black	T
XM_018038936.1	black	T
XM_018039021.1	black	T
XM_018039042.1	black	T
XM_018039061.1	black	T
XM_018039134.1	black	T
XM_018039184.1	black	T
XM_018039377.1	black	T
XM_018039407.1	black	T
XM_018039487.1	black	T
XM_018039535.1	black	T
XM_018039585.1	black	T
XM_018039699.1	black	T
XM_018039703.1	black	T
XM_018039895.1	black	T
XM_018040116.1	black	T
XM_018040226.1	black	T
XM_018040227.1	black	T
XM_018040377.1	black	T
XM_018040402.1	black	T
XM_018040414.1	black	T
XM_018040426.1	black	T
XM_018040484.1	black	T
XM_018041217.1	black	T
XM_018041366.1	black	T
XM_018041376.1	black	T
XM_018041382.1	black	T
XM_018041417.1	black	T
XM_018041578.1	black	T
XM_018041597.1	black	T
XM_018041615.1	black	T
XM_018041616.1	black	T
XM_018041840.1	black	T
XM_018041911.1	black	T
XM_018041971.1	black	T
XM_018041995.1	black	T
XM_018042009.1	black	T
XM_018042023.1	black	T
XM_018042095.1	black	T
XM_018042104.1	black	T
XM_018042120.1	black	T
XM_018042151.1	black	T
XM_018042159.1	black	T
XM_018042277.1	black	T
XM_018042451.1	black	T
XM_018042455.1	black	T
XM_018042476.1	black	T
XM_018042490.1	black	T
XM_018042529.1	black	T
XM_018042683.1	black	T
XM_018042722.1	black	T
XM_018042752.1	black	T
XM_018042803.1	black	T
XM_018042869.1	black	T
XM_018042908.1	black	T
XM_018042953.1	black	T
XM_018043164.1	black	T
XM_018043223.1	black	T
XM_018043431.1	black	T
XM_018043444.1	black	T
XM_018043455.1	black	T
XM_018043496.1	black	T
XM_018043767.1	black	T
XM_018043900.1	black	T
XM_018043940.1	black	T
XM_018044114.1	black	T
XM_018044189.1	black	T
XM_018044203.1	black	T
XM_018044384.1	black	T
XM_018044495.1	black	T
XM_018044505.1	black	T
XM_018044506.1	black	T
XM_018044598.1	black	T
XM_018044619.1	black	T
XM_018044661.1	black	T
XM_018044754.1	black	T
XM_018044757.1	black	T
XM_018044777.1	black	T
XM_018045231.1	black	T
XM_018045327.1	black	T
XM_018045511.1	black	T
XM_018045701.1	black	T
XM_018045733.1	black	T
XM_018045756.1	black	T
XM_018045827.1	black	T
XM_018045996.1	black	T
XM_018046246.1	black	T
XM_018046390.1	black	T
XM_018046525.1	black	T
XM_018046547.1	black	T
XM_018046752.1	black	T
XM_018046761.1	black	T
XM_018046814.1	black	T
XM_018046987.1	black	T
XM_018047096.1	black	T
XM_018047135.1	black	T
XM_018047243.1	black	T
XM_018047299.1	black	T
XM_018047357.1	black	T
XM_018047571.1	black	T
XM_018047593.1	black	T
XM_018047609.1	black	T
XM_018047615.1	black	T
XM_018047860.1	black	T
XM_018047954.1	black	T
XM_018047978.1	black	T
XM_018047999.1	black	T
XM_018048131.1	black	T
XM_018048135.1	black	T
XM_018048146.1	black	T
XM_018048218.1	black	T
XM_018048494.1	black	T
XM_018048513.1	black	T
XM_018048527.1	black	T
XM_018048559.1	black	T
XM_018048573.1	black	T
XM_018048591.1	black	T
XM_018048775.1	black	T
XM_018048792.1	black	T
XM_018048860.1	black	T
XM_018048901.1	black	T
XM_018048939.1	black	T
XM_018048944.1	black	T
XM_018049176.1	black	T
XM_018049177.1	black	T
XM_018049269.1	black	T
XM_018049314.1	black	T
XM_018049336.1	black	T
XM_018049381.1	black	T
XM_018049483.1	black	T
XM_018049607.1	black	T
XM_018049636.1	black	T
XM_018049667.1	black	T
XM_018049768.1	black	T
XM_018049826.1	black	T
XM_018049849.1	black	T
XM_018050027.1	black	T
XM_018050039.1	black	T
XM_018050071.1	black	T
XM_018050122.1	black	T
XM_018050186.1	black	T
XM_018050372.1	black	T
XM_018050546.1	black	T
XM_018050722.1	black	T
XM_018050734.1	black	T
XM_018050803.1	black	T
XM_018050852.1	black	T
XM_018050865.1	black	T
XM_018050969.1	black	T
XM_018050981.1	black	T
XM_018051086.1	black	T
XM_018051101.1	black	T
XM_018051411.1	black	T
XM_018051431.1	black	T
XM_018051434.1	black	T
XM_018051660.1	black	T
XM_018051773.1	black	T
XM_018051811.1	black	T
XM_018051829.1	black	T
XM_018051905.1	black	T
XM_018051924.1	black	T
XM_018052110.1	black	T
XM_018052200.1	black	T
XM_018052396.1	black	T
XM_018052498.1	black	T
XM_018052530.1	black	T
XM_018052531.1	black	T
XM_018052878.1	black	T
XM_018052927.1	black	T
XM_018052932.1	black	T
XM_018052941.1	black	T
XM_018052991.1	black	T
XM_018053019.1	black	T
XM_018053022.1	black	T
XM_018053113.1	black	T
XM_018053192.1	black	T
XM_018053308.1	black	T
XM_018053318.1	black	T
XM_018053701.1	black	T
XM_018053712.1	black	T
XM_018053829.1	black	T
XM_018053888.1	black	T
XM_018054060.1	black	T
XM_018054128.1	black	T
XM_018054241.1	black	T
XM_018054262.1	black	T
XM_018054357.1	black	T
XM_018054383.1	black	T
XM_018054659.1	black	T
XM_018054842.1	black	T
XM_018054887.1	black	T
XM_018054930.1	black	T
XM_018055077.1	black	T
XM_018055155.1	black	T
XM_018055176.1	black	T
XM_018055203.1	black	T
XM_018055242.1	black	T
XM_018055368.1	black	T
XM_018055443.1	black	T
XM_018055496.1	black	T
XM_018055701.1	black	T
XM_018055702.1	black	T
XM_018055703.1	black	T
XM_018055745.1	black	T
XM_018055756.1	black	T
XM_018056025.1	black	T
XM_018056126.1	black	T
XM_018056282.1	black	T
XM_018056418.1	black	T
XM_018056508.1	black	T
XM_018056512.1	black	T
XM_018056527.1	black	T
XM_018056531.1	black	T
XM_018056565.1	black	T
XM_018056613.1	black	T
XM_018056741.1	black	T
XM_018056756.1	black	T
XM_018056769.1	black	T
XM_018056784.1	black	T
XM_018056787.1	black	T
XM_018056788.1	black	T
XM_018056823.1	black	T
XM_018056904.1	black	T
XM_018056908.1	black	T
XM_018056958.1	black	T
XM_018056983.1	black	T
XM_018057185.1	black	T
XM_018057204.1	black	T
XM_018057245.1	black	T
XM_018057310.1	black	T
XM_018057481.1	black	T
XM_018057757.1	black	T
XM_018058171.1	black	T
XM_018058180.1	black	T
XM_018058351.1	black	T
XM_018058473.1	black	T
XM_018058536.1	black	T
XM_018058614.1	black	T
XM_018058682.1	black	T
XM_018058763.1	black	T
XM_018059126.1	black	T
XM_018059518.1	black	T
XM_018059528.1	black	T
XM_018059754.1	black	T
XM_018059864.1	black	T
XM_018060176.1	black	T
XM_018060329.1	black	T
XM_018060361.1	black	T
XM_018060618.1	black	T
XM_018060720.1	black	T
XM_018060791.1	black	T
XM_018060810.1	black	T
XM_018060838.1	black	T
XM_018061019.1	black	T
XM_018061045.1	black	T
XM_018061082.1	black	T
XM_018061128.1	black	T
XM_018061148.1	black	T
XM_018061209.1	black	T
XM_018061258.1	black	T
XM_018061356.1	black	T
XM_018061516.1	black	T
XM_018061520.1	black	T
XM_018061681.1	black	T
XM_018062007.1	black	T
XM_018062063.1	black	T
XM_018062085.1	black	T
XM_018062162.1	black	T
XM_018062238.1	black	T
XM_018062296.1	black	T
XM_018062392.1	black	T
XM_018062643.1	black	T
XM_018062703.1	black	T
XM_018062809.1	black	T
XM_018062874.1	black	T
XM_018062978.1	black	T
XM_018063074.1	black	T
XM_018063502.1	black	T
XM_018063523.1	black	T
XM_018063668.1	black	T
XM_018063826.1	black	T
XM_018063901.1	black	T
XM_018063921.1	black	T
XM_018063922.1	black	T
XM_018064076.1	black	T
XM_018064111.1	black	T
XM_018064144.1	black	T
XM_018064357.1	black	T
XM_018064415.1	black	T
XM_018064437.1	black	T
XM_018064462.1	black	T
XM_018064616.1	black	T
XM_018064631.1	black	T
XM_018064684.1	black	T
XM_018064711.1	black	T
XM_018064783.1	black	T
XM_018064846.1	black	T
XM_018064977.1	black	T
XM_018064988.1	black	T
XM_018065104.1	black	T
XM_018065300.1	black	T
XM_018065347.1	black	T
XM_018065491.1	black	T
XM_018065506.1	black	T
XM_018065524.1	black	T
XM_018065576.1	black	T
XM_018065583.1	black	T
XM_018065671.1	black	T
XM_018065734.1	black	T
XM_018065828.1	black	T
XM_018065874.1	black	T
XM_018065881.1	black	T
XM_018065980.1	black	T
XM_018066098.1	black	T
XM_018066141.1	black	T
XM_018066158.1	black	T
XM_018066269.1	black	T
XM_018066441.1	black	T
XM_018066472.1	black	T
XM_018066515.1	black	T
XM_018067026.1	black	T
XM_018067185.1	black	T
XM_018067196.1	black	T
XR_001296103.2	black	T
XR_001296292.2	black	T
XR_001297290.2	black	T
XR_001917629.1	black	T
XR_001917770.1	black	T
XR_001918010.1	black	T
XR_001918156.1	black	T
XR_001918224.1	black	T
XR_001918276.1	black	T
XR_001918288.1	black	T
XR_001918454.1	black	T
XR_001918566.1	black	T
XR_001919467.1	black	T
XR_001919588.1	black	T
XR_001919798.1	black	T
XR_001919846.1	black	T
MIR1248	blue	D
MIR2332	blue	D
MIR25_1	blue	D
MIR7	blue	D
MIR7_1	blue	D
MSTRG.10003.1	blue	D
MSTRG.10008.4	blue	D
MSTRG.10023.2	blue	D
MSTRG.10100.5	blue	D
MSTRG.10104.1	blue	D
MSTRG.10117.2	blue	D
MSTRG.10148.1	blue	D
MSTRG.10158.2	blue	D
MSTRG.10217.1	blue	D
MSTRG.10234.1	blue	D
MSTRG.10235.2	blue	D
MSTRG.10235.5	blue	D
MSTRG.10279.1	blue	D
MSTRG.10314.1	blue	D
MSTRG.10320.1	blue	D
MSTRG.10323.3	blue	D
MSTRG.10345.3	blue	D
MSTRG.10350.1	blue	D
MSTRG.10366.2	blue	D
MSTRG.10367.1	blue	D
MSTRG.10390.19	blue	D
MSTRG.10406.1	blue	D
MSTRG.10426.15	blue	D
MSTRG.10426.22	blue	D
MSTRG.10426.25	blue	D
MSTRG.10426.3	blue	D
MSTRG.10426.4	blue	D
MSTRG.10426.5	blue	D
MSTRG.10426.7	blue	D
MSTRG.10440.2	blue	D
MSTRG.10453.2	blue	D
MSTRG.10465.5	blue	D
MSTRG.10470.1	blue	D
MSTRG.10489.1	blue	D
MSTRG.10491.1	blue	D
MSTRG.10537.1	blue	D
MSTRG.1055.1	blue	D
MSTRG.10570.1	blue	D
MSTRG.10570.3	blue	D
MSTRG.10581.1	blue	D
MSTRG.10591.1	blue	D
MSTRG.10607.1	blue	D
MSTRG.1062.2	blue	D
MSTRG.10634.3	blue	D
MSTRG.10635.1	blue	D
MSTRG.10645.3	blue	D
MSTRG.10656.1	blue	D
MSTRG.10678.4	blue	D
MSTRG.10680.2	blue	D
MSTRG.10696.1	blue	D
MSTRG.10711.1	blue	D
MSTRG.10715.3	blue	D
MSTRG.10721.2	blue	D
MSTRG.10725.5	blue	D
MSTRG.10734.1	blue	D
MSTRG.10737.5	blue	D
MSTRG.10748.1	blue	D
MSTRG.10780.2	blue	D
MSTRG.10803.9	blue	D
MSTRG.1082.4	blue	D
MSTRG.1085.3	blue	D
MSTRG.10859.1	blue	D
MSTRG.10865.4	blue	D
MSTRG.10891.3	blue	D
MSTRG.10906.1	blue	D
MSTRG.10906.5	blue	D
MSTRG.10991.3	blue	D
MSTRG.11011.2	blue	D
MSTRG.11018.2	blue	D
MSTRG.11050.1	blue	D
MSTRG.11057.2	blue	D
MSTRG.11066.1	blue	D
MSTRG.11071.1	blue	D
MSTRG.11071.2	blue	D
MSTRG.1108.1	blue	D
MSTRG.11087.3	blue	D
MSTRG.11090.4	blue	D
MSTRG.11113.2	blue	D
MSTRG.11129.4	blue	D
MSTRG.11131.1	blue	D
MSTRG.11131.5	blue	D
MSTRG.11131.9	blue	D
MSTRG.11152.7	blue	D
MSTRG.11195.1	blue	D
MSTRG.11221.1	blue	D
MSTRG.1123.1	blue	D
MSTRG.11235.1	blue	D
MSTRG.1126.3	blue	D
MSTRG.11295.4	blue	D
MSTRG.11307.3	blue	D
MSTRG.11314.3	blue	D
MSTRG.1135.1	blue	D
MSTRG.11393.8	blue	D
MSTRG.114.5	blue	D
MSTRG.11423.1	blue	D
MSTRG.11511.2	blue	D
MSTRG.11516.1	blue	D
MSTRG.11516.7	blue	D
MSTRG.1152.1	blue	D
MSTRG.11525.3	blue	D
MSTRG.11546.1	blue	D
MSTRG.11593.1	blue	D
MSTRG.11593.5	blue	D
MSTRG.11595.1	blue	D
MSTRG.11595.2	blue	D
MSTRG.11596.3	blue	D
MSTRG.11596.7	blue	D
MSTRG.11634.1	blue	D
MSTRG.11649.2	blue	D
MSTRG.11662.1	blue	D
MSTRG.11678.1	blue	D
MSTRG.11685.2	blue	D
MSTRG.117.4	blue	D
MSTRG.11700.2	blue	D
MSTRG.11700.6	blue	D
MSTRG.11700.7	blue	D
MSTRG.11700.9	blue	D
MSTRG.11707.2	blue	D
MSTRG.11719.7	blue	D
MSTRG.11741.1	blue	D
MSTRG.11742.3	blue	D
MSTRG.11743.2	blue	D
MSTRG.11779.1	blue	D
MSTRG.11852.4	blue	D
MSTRG.11881.4	blue	D
MSTRG.11912.3	blue	D
MSTRG.11923.1	blue	D
MSTRG.11942.1	blue	D
MSTRG.11961.3	blue	D
MSTRG.11961.5	blue	D
MSTRG.11973.2	blue	D
MSTRG.11978.4	blue	D
MSTRG.11978.8	blue	D
MSTRG.11984.11	blue	D
MSTRG.11984.4	blue	D
MSTRG.12008.1	blue	D
MSTRG.12022.2	blue	D
MSTRG.1203.2	blue	D
MSTRG.12030.1	blue	D
MSTRG.12034.2	blue	D
MSTRG.12039.1	blue	D
MSTRG.12047.2	blue	D
MSTRG.12047.3	blue	D
MSTRG.12057.2	blue	D
MSTRG.12064.1	blue	D
MSTRG.1207.2	blue	D
MSTRG.12076.1	blue	D
MSTRG.12076.2	blue	D
MSTRG.12087.4	blue	D
MSTRG.12094.1	blue	D
MSTRG.12111.3	blue	D
MSTRG.12111.4	blue	D
MSTRG.12112.1	blue	D
MSTRG.12112.2	blue	D
MSTRG.12143.1	blue	D
MSTRG.12149.2	blue	D
MSTRG.12171.1	blue	D
MSTRG.12172.6	blue	D
MSTRG.12180.2	blue	D
MSTRG.12180.3	blue	D
MSTRG.12182.1	blue	D
MSTRG.12196.2	blue	D
MSTRG.12197.6	blue	D
MSTRG.12213.7	blue	D
MSTRG.12217.1	blue	D
MSTRG.12218.1	blue	D
MSTRG.12221.1	blue	D
MSTRG.12221.2	blue	D
MSTRG.12227.4	blue	D
MSTRG.12231.2	blue	D
MSTRG.12255.1	blue	D
MSTRG.12259.1	blue	D
MSTRG.12293.6	blue	D
MSTRG.12301.2	blue	D
MSTRG.12304.1	blue	D
MSTRG.12319.2	blue	D
MSTRG.12325.2	blue	D
MSTRG.12328.1	blue	D
MSTRG.1234.12	blue	D
MSTRG.1234.19	blue	D
MSTRG.12341.6	blue	D
MSTRG.12350.2	blue	D
MSTRG.12425.2	blue	D
MSTRG.1243.2	blue	D
MSTRG.12444.6	blue	D
MSTRG.12459.3	blue	D
MSTRG.12465.2	blue	D
MSTRG.12471.2	blue	D
MSTRG.12478.1	blue	D
MSTRG.12490.3	blue	D
MSTRG.12538.1	blue	D
MSTRG.12544.1	blue	D
MSTRG.12555.2	blue	D
MSTRG.12601.1	blue	D
MSTRG.12608.1	blue	D
MSTRG.12610.4	blue	D
MSTRG.12672.2	blue	D
MSTRG.12683.1	blue	D
MSTRG.12707.6	blue	D
MSTRG.12716.2	blue	D
MSTRG.1272.3	blue	D
MSTRG.12785.2	blue	D
MSTRG.12795.1	blue	D
MSTRG.128.3	blue	D
MSTRG.12803.1	blue	D
MSTRG.12807.1	blue	D
MSTRG.12808.8	blue	D
MSTRG.1282.3	blue	D
MSTRG.12824.3	blue	D
MSTRG.12824.5	blue	D
MSTRG.12825.1	blue	D
MSTRG.12834.4	blue	D
MSTRG.12876.1	blue	D
MSTRG.12876.2	blue	D
MSTRG.12878.1	blue	D
MSTRG.12938.1	blue	D
MSTRG.13039.8	blue	D
MSTRG.13052.1	blue	D
MSTRG.13060.1	blue	D
MSTRG.13107.1	blue	D
MSTRG.1311.5	blue	D
MSTRG.13119.10	blue	D
MSTRG.13119.4	blue	D
MSTRG.1313.5	blue	D
MSTRG.13150.1	blue	D
MSTRG.13178.1	blue	D
MSTRG.13178.3	blue	D
MSTRG.13189.8	blue	D
MSTRG.13253.9	blue	D
MSTRG.13257.1	blue	D
MSTRG.13274.20	blue	D
MSTRG.13279.8	blue	D
MSTRG.13321.1	blue	D
MSTRG.13326.13	blue	D
MSTRG.13348.2	blue	D
MSTRG.13354.3	blue	D
MSTRG.13355.3	blue	D
MSTRG.13394.2	blue	D
MSTRG.13398.1	blue	D
MSTRG.13398.3	blue	D
MSTRG.13403.10	blue	D
MSTRG.13403.9	blue	D
MSTRG.13406.1	blue	D
MSTRG.13411.13	blue	D
MSTRG.13452.2	blue	D
MSTRG.13460.14	blue	D
MSTRG.1349.2	blue	D
MSTRG.13502.3	blue	D
MSTRG.13503.17	blue	D
MSTRG.13563.2	blue	D
MSTRG.13567.5	blue	D
MSTRG.13584.2	blue	D
MSTRG.13593.8	blue	D
MSTRG.13647.11	blue	D
MSTRG.13649.1	blue	D
MSTRG.13728.4	blue	D
MSTRG.13731.1	blue	D
MSTRG.13745.3	blue	D
MSTRG.13751.2	blue	D
MSTRG.13761.2	blue	D
MSTRG.13811.1	blue	D
MSTRG.13821.2	blue	D
MSTRG.13823.6	blue	D
MSTRG.13827.1	blue	D
MSTRG.13834.1	blue	D
MSTRG.13837.2	blue	D
MSTRG.13879.4	blue	D
MSTRG.13879.5	blue	D
MSTRG.1389.1	blue	D
MSTRG.13892.1	blue	D
MSTRG.13916.1	blue	D
MSTRG.13931.1	blue	D
MSTRG.13932.1	blue	D
MSTRG.13937.1	blue	D
MSTRG.13954.1	blue	D
MSTRG.13957.1	blue	D
MSTRG.1400.1	blue	D
MSTRG.1403.1	blue	D
MSTRG.14034.1	blue	D
MSTRG.14060.9	blue	D
MSTRG.14074.13	blue	D
MSTRG.14074.15	blue	D
MSTRG.14074.22	blue	D
MSTRG.14074.26	blue	D
MSTRG.14074.27	blue	D
MSTRG.14074.3	blue	D
MSTRG.14075.1	blue	D
MSTRG.14081.1	blue	D
MSTRG.14082.5	blue	D
MSTRG.14165.2	blue	D
MSTRG.14165.6	blue	D
MSTRG.14167.8	blue	D
MSTRG.14237.4	blue	D
MSTRG.14238.1	blue	D
MSTRG.14257.2	blue	D
MSTRG.14257.3	blue	D
MSTRG.14280.1	blue	D
MSTRG.14302.10	blue	D
MSTRG.14302.15	blue	D
MSTRG.14302.7	blue	D
MSTRG.14306.1	blue	D
MSTRG.14306.2	blue	D
MSTRG.14326.1	blue	D
MSTRG.14342.2	blue	D
MSTRG.14343.1	blue	D
MSTRG.14343.2	blue	D
MSTRG.14362.1	blue	D
MSTRG.14386.1	blue	D
MSTRG.14411.3	blue	D
MSTRG.14411.4	blue	D
MSTRG.14419.3	blue	D
MSTRG.14489.6	blue	D
MSTRG.14497.5	blue	D
MSTRG.1450.2	blue	D
MSTRG.14506.4	blue	D
MSTRG.14531.1	blue	D
MSTRG.14531.2	blue	D
MSTRG.14532.7	blue	D
MSTRG.14555.1	blue	D
MSTRG.14555.7	blue	D
MSTRG.14556.2	blue	D
MSTRG.14560.1	blue	D
MSTRG.14568.2	blue	D
MSTRG.14600.1	blue	D
MSTRG.14629.5	blue	D
MSTRG.14635.1	blue	D
MSTRG.14635.2	blue	D
MSTRG.14639.1	blue	D
MSTRG.14642.1	blue	D
MSTRG.14642.3	blue	D
MSTRG.14649.1	blue	D
MSTRG.14652.1	blue	D
MSTRG.14669.1	blue	D
MSTRG.14671.2	blue	D
MSTRG.14681.2	blue	D
MSTRG.14790.4	blue	D
MSTRG.14844.1	blue	D
MSTRG.14845.1	blue	D
MSTRG.14845.3	blue	D
MSTRG.1485.1	blue	D
MSTRG.14884.1	blue	D
MSTRG.14890.4	blue	D
MSTRG.1490.4	blue	D
MSTRG.14950.1	blue	D
MSTRG.14952.1	blue	D
MSTRG.14964.1	blue	D
MSTRG.14979.1	blue	D
MSTRG.14999.2	blue	D
MSTRG.15001.3	blue	D
MSTRG.15001.4	blue	D
MSTRG.1502.1	blue	D
MSTRG.15070.11	blue	D
MSTRG.15070.9	blue	D
MSTRG.15138.1	blue	D
MSTRG.15148.7	blue	D
MSTRG.15199.2	blue	D
MSTRG.15199.6	blue	D
MSTRG.15199.7	blue	D
MSTRG.15199.8	blue	D
MSTRG.1520.2	blue	D
MSTRG.1522.7	blue	D
MSTRG.15245.4	blue	D
MSTRG.15249.4	blue	D
MSTRG.15276.7	blue	D
MSTRG.15278.6	blue	D
MSTRG.15297.4	blue	D
MSTRG.15297.6	blue	D
MSTRG.15299.8	blue	D
MSTRG.15322.1	blue	D
MSTRG.15328.1	blue	D
MSTRG.15328.3	blue	D
MSTRG.15328.6	blue	D
MSTRG.15340.1	blue	D
MSTRG.1538.1	blue	D
MSTRG.15404.1	blue	D
MSTRG.15423.1	blue	D
MSTRG.15469.1	blue	D
MSTRG.15479.1	blue	D
MSTRG.15536.1	blue	D
MSTRG.1555.5	blue	D
MSTRG.15554.2	blue	D
MSTRG.15556.2	blue	D
MSTRG.15558.7	blue	D
MSTRG.1556.2	blue	D
MSTRG.15574.1	blue	D
MSTRG.15579.3	blue	D
MSTRG.15597.1	blue	D
MSTRG.15604.4	blue	D
MSTRG.15611.6	blue	D
MSTRG.15626.1	blue	D
MSTRG.15633.7	blue	D
MSTRG.15662.4	blue	D
MSTRG.15687.1	blue	D
MSTRG.15693.8	blue	D
MSTRG.157.1	blue	D
MSTRG.15702.1	blue	D
MSTRG.15711.1	blue	D
MSTRG.15711.4	blue	D
MSTRG.1573.1	blue	D
MSTRG.1574.7	blue	D
MSTRG.15830.1	blue	D
MSTRG.15835.9	blue	D
MSTRG.15840.6	blue	D
MSTRG.15875.1	blue	D
MSTRG.1590.13	blue	D
MSTRG.15921.10	blue	D
MSTRG.15985.1	blue	D
MSTRG.15989.4	blue	D
MSTRG.15989.5	blue	D
MSTRG.15991.12	blue	D
MSTRG.16003.1	blue	D
MSTRG.16015.18	blue	D
MSTRG.16056.2	blue	D
MSTRG.16062.1	blue	D
MSTRG.16113.1	blue	D
MSTRG.16125.2	blue	D
MSTRG.16176.8	blue	D
MSTRG.16192.2	blue	D
MSTRG.16257.1	blue	D
MSTRG.16305.1	blue	D
MSTRG.16324.4	blue	D
MSTRG.16329.1	blue	D
MSTRG.16341.4	blue	D
MSTRG.16398.10	blue	D
MSTRG.16400.1	blue	D
MSTRG.16407.4	blue	D
MSTRG.16410.7	blue	D
MSTRG.16410.9	blue	D
MSTRG.16427.4	blue	D
MSTRG.16464.6	blue	D
MSTRG.16464.7	blue	D
MSTRG.16467.2	blue	D
MSTRG.16473.1	blue	D
MSTRG.16476.1	blue	D
MSTRG.16482.1	blue	D
MSTRG.16493.4	blue	D
MSTRG.16502.2	blue	D
MSTRG.16529.1	blue	D
MSTRG.16551.2	blue	D
MSTRG.16551.3	blue	D
MSTRG.16570.1	blue	D
MSTRG.16584.1	blue	D
MSTRG.16584.5	blue	D
MSTRG.16636.7	blue	D
MSTRG.16674.5	blue	D
MSTRG.16686.1	blue	D
MSTRG.1669.1	blue	D
MSTRG.16752.3	blue	D
MSTRG.16752.4	blue	D
MSTRG.16755.2	blue	D
MSTRG.16763.1	blue	D
MSTRG.16763.26	blue	D
MSTRG.16763.32	blue	D
MSTRG.16766.2	blue	D
MSTRG.1679.1	blue	D
MSTRG.168.3	blue	D
MSTRG.1681.2	blue	D
MSTRG.16833.1	blue	D
MSTRG.16842.7	blue	D
MSTRG.1687.1	blue	D
MSTRG.16891.3	blue	D
MSTRG.16927.6	blue	D
MSTRG.16927.7	blue	D
MSTRG.16948.1	blue	D
MSTRG.16959.1	blue	D
MSTRG.16962.3	blue	D
MSTRG.16991.3	blue	D
MSTRG.16997.1	blue	D
MSTRG.16997.4	blue	D
MSTRG.17007.1	blue	D
MSTRG.17013.1	blue	D
MSTRG.17021.1	blue	D
MSTRG.17030.5	blue	D
MSTRG.17060.2	blue	D
MSTRG.17062.10	blue	D
MSTRG.17062.11	blue	D
MSTRG.17062.9	blue	D
MSTRG.17084.1	blue	D
MSTRG.17115.4	blue	D
MSTRG.1714.1	blue	D
MSTRG.17143.1	blue	D
MSTRG.17151.1	blue	D
MSTRG.17152.1	blue	D
MSTRG.17153.2	blue	D
MSTRG.17159.1	blue	D
MSTRG.17162.1	blue	D
MSTRG.17165.1	blue	D
MSTRG.17168.2	blue	D
MSTRG.17179.5	blue	D
MSTRG.17180.7	blue	D
MSTRG.17187.3	blue	D
MSTRG.17190.1	blue	D
MSTRG.17191.1	blue	D
MSTRG.17192.1	blue	D
MSTRG.17194.1	blue	D
MSTRG.17195.1	blue	D
MSTRG.17196.1	blue	D
MSTRG.17200.16	blue	D
MSTRG.17200.25	blue	D
MSTRG.17202.1	blue	D
MSTRG.17204.1	blue	D
MSTRG.17205.1	blue	D
MSTRG.17206.1	blue	D
MSTRG.17207.1	blue	D
MSTRG.17208.1	blue	D
MSTRG.17209.1	blue	D
MSTRG.17213.1	blue	D
MSTRG.17219.5	blue	D
MSTRG.17220.1	blue	D
MSTRG.17221.1	blue	D
MSTRG.17222.1	blue	D
MSTRG.17223.1	blue	D
MSTRG.17223.6	blue	D
MSTRG.17224.1	blue	D
MSTRG.17226.1	blue	D
MSTRG.17227.1	blue	D
MSTRG.17228.1	blue	D
MSTRG.17229.1	blue	D
MSTRG.17240.1	blue	D
MSTRG.17243.2	blue	D
MSTRG.17244.1	blue	D
MSTRG.17248.1	blue	D
MSTRG.17290.1	blue	D
MSTRG.17301.5	blue	D
MSTRG.17313.1	blue	D
MSTRG.17314.1	blue	D
MSTRG.17316.10	blue	D
MSTRG.17316.20	blue	D
MSTRG.17316.24	blue	D
MSTRG.17317.1	blue	D
MSTRG.17318.1	blue	D
MSTRG.17319.1	blue	D
MSTRG.17323.1	blue	D
MSTRG.17323.2	blue	D
MSTRG.17325.1	blue	D
MSTRG.17327.1	blue	D
MSTRG.17328.1	blue	D
MSTRG.17332.1	blue	D
MSTRG.17333.1	blue	D
MSTRG.17333.2	blue	D
MSTRG.17334.1	blue	D
MSTRG.17335.1	blue	D
MSTRG.17338.1	blue	D
MSTRG.17339.1	blue	D
MSTRG.17341.1	blue	D
MSTRG.17343.1	blue	D
MSTRG.17347.1	blue	D
MSTRG.17348.1	blue	D
MSTRG.17350.1	blue	D
MSTRG.17354.1	blue	D
MSTRG.17355.1	blue	D
MSTRG.17356.1	blue	D
MSTRG.17357.1	blue	D
MSTRG.17359.1	blue	D
MSTRG.17360.1	blue	D
MSTRG.17360.2	blue	D
MSTRG.17363.1	blue	D
MSTRG.17364.1	blue	D
MSTRG.17365.1	blue	D
MSTRG.17366.1	blue	D
MSTRG.17367.2	blue	D
MSTRG.17369.1	blue	D
MSTRG.17371.4	blue	D
MSTRG.17379.1	blue	D
MSTRG.17381.1	blue	D
MSTRG.17382.1	blue	D
MSTRG.17382.2	blue	D
MSTRG.17383.1	blue	D
MSTRG.17386.1	blue	D
MSTRG.17387.1	blue	D
MSTRG.17388.1	blue	D
MSTRG.17396.1	blue	D
MSTRG.17398.1	blue	D
MSTRG.17399.1	blue	D
MSTRG.17403.1	blue	D
MSTRG.17406.1	blue	D
MSTRG.17407.1	blue	D
MSTRG.17409.1	blue	D
MSTRG.17412.1	blue	D
MSTRG.17415.1	blue	D
MSTRG.17416.1	blue	D
MSTRG.17417.1	blue	D
MSTRG.17421.1	blue	D
MSTRG.17423.1	blue	D
MSTRG.17433.1	blue	D
MSTRG.17434.1	blue	D
MSTRG.17436.1	blue	D
MSTRG.17439.1	blue	D
MSTRG.17441.1	blue	D
MSTRG.17445.1	blue	D
MSTRG.17448.1	blue	D
MSTRG.17449.1	blue	D
MSTRG.17450.1	blue	D
MSTRG.17451.1	blue	D
MSTRG.17452.1	blue	D
MSTRG.17454.1	blue	D
MSTRG.17455.1	blue	D
MSTRG.17457.1	blue	D
MSTRG.17458.1	blue	D
MSTRG.17461.1	blue	D
MSTRG.17462.1	blue	D
MSTRG.17463.1	blue	D
MSTRG.17467.2	blue	D
MSTRG.17468.1	blue	D
MSTRG.17469.1	blue	D
MSTRG.17469.2	blue	D
MSTRG.17470.1	blue	D
MSTRG.17471.1	blue	D
MSTRG.17474.1	blue	D
MSTRG.17478.2	blue	D
MSTRG.17481.1	blue	D
MSTRG.17485.1	blue	D
MSTRG.17486.1	blue	D
MSTRG.17488.1	blue	D
MSTRG.17489.1	blue	D
MSTRG.1749.2	blue	D
MSTRG.17490.2	blue	D
MSTRG.17493.1	blue	D
MSTRG.17496.1	blue	D
MSTRG.17498.1	blue	D
MSTRG.17500.3	blue	D
MSTRG.17506.1	blue	D
MSTRG.17507.1	blue	D
MSTRG.17508.2	blue	D
MSTRG.17510.1	blue	D
MSTRG.17513.1	blue	D
MSTRG.17524.3	blue	D
MSTRG.17526.1	blue	D
MSTRG.17527.1	blue	D
MSTRG.17528.1	blue	D
MSTRG.17529.1	blue	D
MSTRG.17530.1	blue	D
MSTRG.17532.1	blue	D
MSTRG.17534.1	blue	D
MSTRG.17536.1	blue	D
MSTRG.17539.16	blue	D
MSTRG.17539.17	blue	D
MSTRG.17539.3	blue	D
MSTRG.17541.1	blue	D
MSTRG.17548.1	blue	D
MSTRG.1755.4	blue	D
MSTRG.1755.5	blue	D
MSTRG.17554.1	blue	D
MSTRG.17555.1	blue	D
MSTRG.17557.1	blue	D
MSTRG.17562.1	blue	D
MSTRG.17563.1	blue	D
MSTRG.17564.1	blue	D
MSTRG.17565.1	blue	D
MSTRG.17566.1	blue	D
MSTRG.17567.1	blue	D
MSTRG.17569.2	blue	D
MSTRG.17570.1	blue	D
MSTRG.17573.1	blue	D
MSTRG.17574.1	blue	D
MSTRG.17576.1	blue	D
MSTRG.17588.1	blue	D
MSTRG.17589.1	blue	D
MSTRG.17590.1	blue	D
MSTRG.17591.1	blue	D
MSTRG.17595.1	blue	D
MSTRG.17597.1	blue	D
MSTRG.17598.1	blue	D
MSTRG.17600.1	blue	D
MSTRG.17605.1	blue	D
MSTRG.17608.1	blue	D
MSTRG.17611.1	blue	D
MSTRG.17611.2	blue	D
MSTRG.17612.1	blue	D
MSTRG.17613.1	blue	D
MSTRG.17614.1	blue	D
MSTRG.17618.1	blue	D
MSTRG.17622.1	blue	D
MSTRG.17629.1	blue	D
MSTRG.17630.1	blue	D
MSTRG.17634.1	blue	D
MSTRG.17635.1	blue	D
MSTRG.17640.1	blue	D
MSTRG.17643.1	blue	D
MSTRG.17646.1	blue	D
MSTRG.17647.1	blue	D
MSTRG.17648.1	blue	D
MSTRG.17650.1	blue	D
MSTRG.17652.1	blue	D
MSTRG.17654.1	blue	D
MSTRG.17654.2	blue	D
MSTRG.17657.1	blue	D
MSTRG.17658.1	blue	D
MSTRG.17660.1	blue	D
MSTRG.17663.1	blue	D
MSTRG.17664.1	blue	D
MSTRG.17674.1	blue	D
MSTRG.17677.1	blue	D
MSTRG.17678.1	blue	D
MSTRG.17685.1	blue	D
MSTRG.17686.1	blue	D
MSTRG.17688.1	blue	D
MSTRG.17692.1	blue	D
MSTRG.17693.10	blue	D
MSTRG.17694.1	blue	D
MSTRG.17696.1	blue	D
MSTRG.17700.1	blue	D
MSTRG.17701.1	blue	D
MSTRG.17702.1	blue	D
MSTRG.17703.1	blue	D
MSTRG.17704.2	blue	D
MSTRG.17705.1	blue	D
MSTRG.17706.2	blue	D
MSTRG.17707.1	blue	D
MSTRG.17709.1	blue	D
MSTRG.17711.1	blue	D
MSTRG.17714.1	blue	D
MSTRG.17716.1	blue	D
MSTRG.17718.1	blue	D
MSTRG.17719.1	blue	D
MSTRG.17722.1	blue	D
MSTRG.17730.1	blue	D
MSTRG.17735.1	blue	D
MSTRG.17738.1	blue	D
MSTRG.1774.2	blue	D
MSTRG.17750.1	blue	D
MSTRG.17751.1	blue	D
MSTRG.17752.1	blue	D
MSTRG.17753.1	blue	D
MSTRG.17754.2	blue	D
MSTRG.17757.1	blue	D
MSTRG.1776.4	blue	D
MSTRG.17767.1	blue	D
MSTRG.17768.1	blue	D
MSTRG.17769.1	blue	D
MSTRG.17770.1	blue	D
MSTRG.17771.1	blue	D
MSTRG.17775.3	blue	D
MSTRG.17776.1	blue	D
MSTRG.17779.1	blue	D
MSTRG.17785.1	blue	D
MSTRG.17789.1	blue	D
MSTRG.17790.1	blue	D
MSTRG.17791.1	blue	D
MSTRG.17792.1	blue	D
MSTRG.17793.1	blue	D
MSTRG.17795.1	blue	D
MSTRG.17802.1	blue	D
MSTRG.17803.1	blue	D
MSTRG.17805.1	blue	D
MSTRG.17807.1	blue	D
MSTRG.17808.1	blue	D
MSTRG.17809.1	blue	D
MSTRG.17810.1	blue	D
MSTRG.17812.1	blue	D
MSTRG.17816.1	blue	D
MSTRG.17822.1	blue	D
MSTRG.17823.1	blue	D
MSTRG.17826.14	blue	D
MSTRG.17826.22	blue	D
MSTRG.17826.5	blue	D
MSTRG.17829.1	blue	D
MSTRG.17834.1	blue	D
MSTRG.17836.1	blue	D
MSTRG.17838.1	blue	D
MSTRG.17840.1	blue	D
MSTRG.17841.1	blue	D
MSTRG.17842.1	blue	D
MSTRG.17845.1	blue	D
MSTRG.17845.2	blue	D
MSTRG.17846.1	blue	D
MSTRG.17850.1	blue	D
MSTRG.17853.1	blue	D
MSTRG.17855.1	blue	D
MSTRG.17856.1	blue	D
MSTRG.17858.1	blue	D
MSTRG.17864.1	blue	D
MSTRG.17869.1	blue	D
MSTRG.1787.12	blue	D
MSTRG.1787.2	blue	D
MSTRG.17870.1	blue	D
MSTRG.17870.2	blue	D
MSTRG.17873.1	blue	D
MSTRG.17881.1	blue	D
MSTRG.17883.1	blue	D
MSTRG.17886.1	blue	D
MSTRG.17887.1	blue	D
MSTRG.17893.5	blue	D
MSTRG.17896.2	blue	D
MSTRG.17902.1	blue	D
MSTRG.17903.1	blue	D
MSTRG.17905.1	blue	D
MSTRG.17906.1	blue	D
MSTRG.17908.1	blue	D
MSTRG.17909.1	blue	D
MSTRG.17911.1	blue	D
MSTRG.17912.1	blue	D
MSTRG.17918.1	blue	D
MSTRG.17920.1	blue	D
MSTRG.17924.1	blue	D
MSTRG.17926.1	blue	D
MSTRG.17930.2	blue	D
MSTRG.17933.1	blue	D
MSTRG.17934.1	blue	D
MSTRG.17935.1	blue	D
MSTRG.17937.1	blue	D
MSTRG.17938.1	blue	D
MSTRG.1794.4	blue	D
MSTRG.17945.1	blue	D
MSTRG.17951.1	blue	D
MSTRG.17954.1	blue	D
MSTRG.17954.2	blue	D
MSTRG.17955.1	blue	D
MSTRG.1805.1	blue	D
MSTRG.1842.16	blue	D
MSTRG.1842.18	blue	D
MSTRG.1842.3	blue	D
MSTRG.1851.6	blue	D
MSTRG.1854.2	blue	D
MSTRG.186.2	blue	D
MSTRG.186.3	blue	D
MSTRG.1917.1	blue	D
MSTRG.1934.1	blue	D
MSTRG.194.1	blue	D
MSTRG.1940.1	blue	D
MSTRG.1942.2	blue	D
MSTRG.198.1	blue	D
MSTRG.198.6	blue	D
MSTRG.2000.1	blue	D
MSTRG.201.1	blue	D
MSTRG.201.2	blue	D
MSTRG.2029.2	blue	D
MSTRG.204.1	blue	D
MSTRG.2052.1	blue	D
MSTRG.2070.1	blue	D
MSTRG.2076.1	blue	D
MSTRG.2094.5	blue	D
MSTRG.2094.7	blue	D
MSTRG.2096.2	blue	D
MSTRG.2099.2	blue	D
MSTRG.2099.5	blue	D
MSTRG.2101.5	blue	D
MSTRG.2118.1	blue	D
MSTRG.2137.1	blue	D
MSTRG.2154.1	blue	D
MSTRG.2154.4	blue	D
MSTRG.2187.5	blue	D
MSTRG.2192.1	blue	D
MSTRG.2195.24	blue	D
MSTRG.2206.1	blue	D
MSTRG.2237.6	blue	D
MSTRG.224.3	blue	D
MSTRG.2258.5	blue	D
MSTRG.2263.1	blue	D
MSTRG.2270.1	blue	D
MSTRG.2298.3	blue	D
MSTRG.2339.10	blue	D
MSTRG.2339.11	blue	D
MSTRG.2339.12	blue	D
MSTRG.2339.13	blue	D
MSTRG.2339.14	blue	D
MSTRG.2339.15	blue	D
MSTRG.2339.17	blue	D
MSTRG.2339.19	blue	D
MSTRG.2339.20	blue	D
MSTRG.2339.21	blue	D
MSTRG.2339.6	blue	D
MSTRG.2339.7	blue	D
MSTRG.2339.8	blue	D
MSTRG.2339.9	blue	D
MSTRG.234.1	blue	D
MSTRG.2349.1	blue	D
MSTRG.2350.4	blue	D
MSTRG.2364.3	blue	D
MSTRG.239.2	blue	D
MSTRG.239.3	blue	D
MSTRG.2399.2	blue	D
MSTRG.2410.1	blue	D
MSTRG.2410.20	blue	D
MSTRG.2410.21	blue	D
MSTRG.2436.2	blue	D
MSTRG.2440.1	blue	D
MSTRG.2454.1	blue	D
MSTRG.254.5	blue	D
MSTRG.2555.1	blue	D
MSTRG.256.3	blue	D
MSTRG.2602.1	blue	D
MSTRG.2610.1	blue	D
MSTRG.264.1	blue	D
MSTRG.264.11	blue	D
MSTRG.2659.2	blue	D
MSTRG.2660.2	blue	D
MSTRG.2662.1	blue	D
MSTRG.2668.3	blue	D
MSTRG.2675.1	blue	D
MSTRG.2677.1	blue	D
MSTRG.2680.5	blue	D
MSTRG.2702.5	blue	D
MSTRG.2724.3	blue	D
MSTRG.2745.1	blue	D
MSTRG.2773.2	blue	D
MSTRG.2781.1	blue	D
MSTRG.2796.1	blue	D
MSTRG.285.1	blue	D
MSTRG.2887.1	blue	D
MSTRG.2887.2	blue	D
MSTRG.2892.3	blue	D
MSTRG.2921.2	blue	D
MSTRG.2951.2	blue	D
MSTRG.2959.2	blue	D
MSTRG.2970.5	blue	D
MSTRG.2970.6	blue	D
MSTRG.2970.7	blue	D
MSTRG.3001.10	blue	D
MSTRG.3019.4	blue	D
MSTRG.3061.1	blue	D
MSTRG.3070.2	blue	D
MSTRG.3079.1	blue	D
MSTRG.308.3	blue	D
MSTRG.3093.2	blue	D
MSTRG.3099.4	blue	D
MSTRG.3121.20	blue	D
MSTRG.3121.21	blue	D
MSTRG.3121.22	blue	D
MSTRG.3121.3	blue	D
MSTRG.3130.1	blue	D
MSTRG.3137.4	blue	D
MSTRG.3146.2	blue	D
MSTRG.3147.3	blue	D
MSTRG.3186.1	blue	D
MSTRG.3187.3	blue	D
MSTRG.324.16	blue	D
MSTRG.3246.2	blue	D
MSTRG.3250.1	blue	D
MSTRG.3282.3	blue	D
MSTRG.3303.2	blue	D
MSTRG.3303.3	blue	D
MSTRG.3325.1	blue	D
MSTRG.3327.1	blue	D
MSTRG.3327.4	blue	D
MSTRG.3329.7	blue	D
MSTRG.333.1	blue	D
MSTRG.3330.1	blue	D
MSTRG.3396.2	blue	D
MSTRG.3440.26	blue	D
MSTRG.3457.1	blue	D
MSTRG.3461.2	blue	D
MSTRG.3464.2	blue	D
MSTRG.3465.2	blue	D
MSTRG.3500.1	blue	D
MSTRG.3514.2	blue	D
MSTRG.3529.2	blue	D
MSTRG.3531.2	blue	D
MSTRG.354.1	blue	D
MSTRG.3558.2	blue	D
MSTRG.3594.2	blue	D
MSTRG.36.7	blue	D
MSTRG.3614.6	blue	D
MSTRG.3632.1	blue	D
MSTRG.3637.1	blue	D
MSTRG.3669.19	blue	D
MSTRG.369.2	blue	D
MSTRG.3702.2	blue	D
MSTRG.3714.5	blue	D
MSTRG.3727.1	blue	D
MSTRG.3762.4	blue	D
MSTRG.3775.1	blue	D
MSTRG.3809.1	blue	D
MSTRG.3813.4	blue	D
MSTRG.3823.1	blue	D
MSTRG.3825.11	blue	D
MSTRG.3829.1	blue	D
MSTRG.3855.1	blue	D
MSTRG.3857.1	blue	D
MSTRG.3861.1	blue	D
MSTRG.3866.2	blue	D
MSTRG.3867.1	blue	D
MSTRG.3867.11	blue	D
MSTRG.3867.2	blue	D
MSTRG.3874.1	blue	D
MSTRG.3875.3	blue	D
MSTRG.3883.1	blue	D
MSTRG.3899.1	blue	D
MSTRG.3931.1	blue	D
MSTRG.3931.2	blue	D
MSTRG.3931.3	blue	D
MSTRG.3960.1	blue	D
MSTRG.3960.2	blue	D
MSTRG.3962.1	blue	D
MSTRG.3997.3	blue	D
MSTRG.400.1	blue	D
MSTRG.4000.4	blue	D
MSTRG.4006.1	blue	D
MSTRG.4009.1	blue	D
MSTRG.4024.4	blue	D
MSTRG.4060.1	blue	D
MSTRG.4087.1	blue	D
MSTRG.4111.5	blue	D
MSTRG.4128.4	blue	D
MSTRG.4137.1	blue	D
MSTRG.4158.2	blue	D
MSTRG.4163.10	blue	D
MSTRG.4172.1	blue	D
MSTRG.4227.1	blue	D
MSTRG.4268.1	blue	D
MSTRG.4282.1	blue	D
MSTRG.4305.3	blue	D
MSTRG.4353.1	blue	D
MSTRG.436.10	blue	D
MSTRG.4361.4	blue	D
[truncated: 24,094 more rows]

## Sheet: blue
fromNode	toNode	weight	direction	fromAltName	toAltName
MSTRG.17354.1	MSTRG.17803.1	0.432669	undirected	MSTRG.17354	MSTRG.17803
MSTRG.17776.1	MSTRG.17803.1	0.429549	undirected	MSTRG.17776	MSTRG.17803
MSTRG.17557.1	MSTRG.17803.1	0.428973	undirected	MSTRG.17557	MSTRG.17803
MSTRG.17709.1	MSTRG.17803.1	0.427354	undirected	MSTRG.17709	MSTRG.17803
MSTRG.17663.1	MSTRG.17803.1	0.42678	undirected	MSTRG.17663	MSTRG.17803
MSTRG.17597.1	MSTRG.17803.1	0.426599	undirected	MSTRG.17597	MSTRG.17803
MSTRG.17347.1	MSTRG.17803.1	0.426151	undirected	MSTRG.17347	MSTRG.17803
MSTRG.17692.1	MSTRG.17803.1	0.425763	undirected	MSTRG.17692	MSTRG.17803
MSTRG.17735.1	MSTRG.17803.1	0.425718	undirected	MSTRG.17735	MSTRG.17803
MSTRG.17455.1	MSTRG.17803.1	0.4255	undirected	MSTRG.17455	MSTRG.17803
MSTRG.17496.1	MSTRG.17803.1	0.425196	undirected	MSTRG.17496	MSTRG.17803
MSTRG.17686.1	MSTRG.17803.1	0.424843	undirected	MSTRG.17686	MSTRG.17803
MSTRG.17650.1	MSTRG.17803.1	0.423383	undirected	MSTRG.17650	MSTRG.17803
MSTRG.17244.1	MSTRG.17803.1	0.423208	undirected	MSTRG.17244	MSTRG.17803
MSTRG.17383.1	MSTRG.17803.1	0.423025	undirected	MSTRG.17383	MSTRG.17803
MSTRG.17398.1	MSTRG.17803.1	0.42258	undirected	MSTRG.17398	MSTRG.17803
MSTRG.17469.1	MSTRG.17803.1	0.422226	undirected	MSTRG.17469	MSTRG.17803
MSTRG.17791.1	MSTRG.17803.1	0.421523	undirected	MSTRG.17791	MSTRG.17803
MSTRG.17590.1	MSTRG.17803.1	0.421391	undirected	MSTRG.17590	MSTRG.17803
MSTRG.17202.1	MSTRG.17496.1	0.421172	undirected	MSTRG.17202	MSTRG.17496
MSTRG.17629.1	MSTRG.17803.1	0.420836	undirected	MSTRG.17629	MSTRG.17803
MSTRG.17802.1	MSTRG.17803.1	0.420638	undirected	MSTRG.17802	MSTRG.17803
MSTRG.17356.1	MSTRG.17803.1	0.420395	undirected	MSTRG.17356	MSTRG.17803
MSTRG.17202.1	MSTRG.17776.1	0.420197	undirected	MSTRG.17202	MSTRG.17776
MSTRG.17202.1	MSTRG.17557.1	0.419925	undirected	MSTRG.17202	MSTRG.17557
MSTRG.17202.1	MSTRG.17354.1	0.419831	undirected	MSTRG.17202	MSTRG.17354
MSTRG.17528.1	MSTRG.17557.1	0.419646	undirected	MSTRG.17528	MSTRG.17557
MSTRG.17528.1	MSTRG.17776.1	0.419594	undirected	MSTRG.17528	MSTRG.17776
MSTRG.17191.1	MSTRG.17803.1	0.419542	undirected	MSTRG.17191	MSTRG.17803
MSTRG.17354.1	MSTRG.17528.1	0.41954	undirected	MSTRG.17354	MSTRG.17528
MSTRG.17803.1	MSTRG.17845.1	0.419471	undirected	MSTRG.17803	MSTRG.17845
MSTRG.17202.1	MSTRG.17455.1	0.419384	undirected	MSTRG.17202	MSTRG.17455
MSTRG.17202.1	MSTRG.17244.1	0.419338	undirected	MSTRG.17202	MSTRG.17244
MSTRG.17570.1	MSTRG.17803.1	0.418943	undirected	MSTRG.17570	MSTRG.17803
MSTRG.17600.1	MSTRG.17803.1	0.4184	undirected	MSTRG.17600	MSTRG.17803
MSTRG.17595.1	MSTRG.17803.1	0.41772	undirected	MSTRG.17595	MSTRG.17803
MSTRG.17493.1	MSTRG.17803.1	0.417495	undirected	MSTRG.17493	MSTRG.17803
MSTRG.17730.1	MSTRG.17803.1	0.417408	undirected	MSTRG.17730	MSTRG.17803
MSTRG.17202.1	MSTRG.17347.1	0.417252	undirected	MSTRG.17202	MSTRG.17347
MSTRG.17591.1	MSTRG.17803.1	0.417074	undirected	MSTRG.17591	MSTRG.17803
MSTRG.17208.1	MSTRG.17803.1	0.417034	undirected	MSTRG.17208	MSTRG.17803
MSTRG.17202.1	MSTRG.17692.1	0.416912	undirected	MSTRG.17202	MSTRG.17692
MSTRG.17803.1	MSTRG.17873.1	0.416904	undirected	MSTRG.17803	MSTRG.17873
MSTRG.17528.1	MSTRG.17663.1	0.416673	undirected	MSTRG.17528	MSTRG.17663
MSTRG.17803.1	MSTRG.17812.1	0.416572	undirected	MSTRG.17803	MSTRG.17812
MSTRG.17528.1	MSTRG.17692.1	0.416307	undirected	MSTRG.17528	MSTRG.17692
MSTRG.17803.1	MSTRG.17886.1	0.416174	undirected	MSTRG.17803	MSTRG.17886
MSTRG.17202.1	MSTRG.17686.1	0.416097	undirected	MSTRG.17202	MSTRG.17686
MSTRG.17406.1	MSTRG.17803.1	0.41603	undirected	MSTRG.17406	MSTRG.17803
MSTRG.17771.1	MSTRG.17803.1	0.415971	undirected	MSTRG.17771	MSTRG.17803
MSTRG.17790.1	MSTRG.17803.1	0.415968	undirected	MSTRG.17790	MSTRG.17803
MSTRG.17532.1	MSTRG.17803.1	0.415939	undirected	MSTRG.17532	MSTRG.17803
MSTRG.17191.1	MSTRG.17202.1	0.415806	undirected	MSTRG.17191	MSTRG.17202
MSTRG.17541.1	MSTRG.17803.1	0.415775	undirected	MSTRG.17541	MSTRG.17803
MSTRG.17528.1	MSTRG.17686.1	0.415756	undirected	MSTRG.17528	MSTRG.17686
MSTRG.17678.1	MSTRG.17803.1	0.415717	undirected	MSTRG.17678	MSTRG.17803
MSTRG.17347.1	MSTRG.17528.1	0.415684	undirected	MSTRG.17347	MSTRG.17528
MSTRG.17496.1	MSTRG.17528.1	0.415603	undirected	MSTRG.17496	MSTRG.17528
MSTRG.17630.1	MSTRG.17803.1	0.41546	undirected	MSTRG.17630	MSTRG.17803
MSTRG.17566.1	MSTRG.17803.1	0.41511	undirected	MSTRG.17566	MSTRG.17803
MSTRG.17528.1	MSTRG.17597.1	0.415093	undirected	MSTRG.17528	MSTRG.17597
MSTRG.17803.1	MSTRG.17955.1	0.415022	undirected	MSTRG.17803	MSTRG.17955
MSTRG.17455.1	MSTRG.17528.1	0.414925	undirected	MSTRG.17455	MSTRG.17528
MSTRG.17202.1	MSTRG.17663.1	0.414845	undirected	MSTRG.17202	MSTRG.17663
MSTRG.17244.1	MSTRG.17528.1	0.414703	undirected	MSTRG.17244	MSTRG.17528
MSTRG.17202.1	MSTRG.17590.1	0.414528	undirected	MSTRG.17202	MSTRG.17590
MSTRG.17202.1	MSTRG.17735.1	0.414371	undirected	MSTRG.17202	MSTRG.17735
MSTRG.17803.1	MSTRG.17808.1	0.413901	undirected	MSTRG.17803	MSTRG.17808
MSTRG.17228.1	MSTRG.17803.1	0.413899	undirected	MSTRG.17228	MSTRG.17803
MSTRG.17202.1	MSTRG.17829.1	0.413895	undirected	MSTRG.17202	MSTRG.17829
MSTRG.17202.1	MSTRG.17709.1	0.413884	undirected	MSTRG.17202	MSTRG.17709
MSTRG.17528.1	MSTRG.17709.1	0.413649	undirected	MSTRG.17528	MSTRG.17709
MSTRG.17357.1	MSTRG.17803.1	0.413479	undirected	MSTRG.17357	MSTRG.17803
MSTRG.17407.1	MSTRG.17803.1	0.413431	undirected	MSTRG.17407	MSTRG.17803
MSTRG.17528.1	MSTRG.17791.1	0.413264	undirected	MSTRG.17528	MSTRG.17791
MSTRG.17387.1	MSTRG.17803.1	0.413252	undirected	MSTRG.17387	MSTRG.17803
MSTRG.17202.1	MSTRG.17335.1	0.41324	undirected	MSTRG.17202	MSTRG.17335
MSTRG.17202.1	MSTRG.17629.1	0.413192	undirected	MSTRG.17202	MSTRG.17629
MSTRG.17528.1	MSTRG.17735.1	0.413147	undirected	MSTRG.17528	MSTRG.17735
MSTRG.17151.1	MSTRG.17803.1	0.413123	undirected	MSTRG.17151	MSTRG.17803
MSTRG.17363.1	MSTRG.17803.1	0.413067	undirected	MSTRG.17363	MSTRG.17803
MSTRG.17202.1	MSTRG.17541.1	0.413014	undirected	MSTRG.17202	MSTRG.17541
MSTRG.17803.1	MSTRG.17902.1	0.412898	undirected	MSTRG.17803	MSTRG.17902
MSTRG.17803.1	MSTRG.17836.1	0.412869	undirected	MSTRG.17803	MSTRG.17836
MSTRG.17202.1	MSTRG.17597.1	0.412816	undirected	MSTRG.17202	MSTRG.17597
MSTRG.17202.1	MSTRG.17650.1	0.412675	undirected	MSTRG.17202	MSTRG.17650
MSTRG.17528.1	MSTRG.17650.1	0.412592	undirected	MSTRG.17528	MSTRG.17650
MSTRG.17803.1	MSTRG.17829.1	0.412496	undirected	MSTRG.17803	MSTRG.17829
MSTRG.17752.1	MSTRG.17803.1	0.412448	undirected	MSTRG.17752	MSTRG.17803
MSTRG.17202.1	MSTRG.17387.1	0.412338	undirected	MSTRG.17202	MSTRG.17387
MSTRG.17335.1	MSTRG.17803.1	0.412327	undirected	MSTRG.17335	MSTRG.17803
MSTRG.17202.1	MSTRG.17771.1	0.41203	undirected	MSTRG.17202	MSTRG.17771
MSTRG.17202.1	MSTRG.17678.1	0.412013	undirected	MSTRG.17202	MSTRG.17678
MSTRG.17613.1	MSTRG.17803.1	0.411926	undirected	MSTRG.17613	MSTRG.17803
MSTRG.17202.1	MSTRG.17791.1	0.411912	undirected	MSTRG.17202	MSTRG.17791
MSTRG.17354.1	MSTRG.17382.1	0.41179	undirected	MSTRG.17354	MSTRG.17382
MSTRG.17202.1	MSTRG.17595.1	0.411743	undirected	MSTRG.17202	MSTRG.17595
MSTRG.17202.1	MSTRG.17406.1	0.411729	undirected	MSTRG.17202	MSTRG.17406
MSTRG.17448.1	MSTRG.17803.1	0.411617	undirected	MSTRG.17448	MSTRG.17803
MSTRG.17202.1	MSTRG.17457.1	0.411612	undirected	MSTRG.17202	MSTRG.17457

## Sheet: brown
fromNode	toNode	weight	direction	fromAltName	toAltName
MSTRG.17538.6	NM_001314269.1	0.228788	undirected	MSTRG.17538	MMP9
XM_018042615.1	XM_018062555.1	0.223362	undirected	HIVEP3	BCL3
MSTRG.11062.3	NM_001314269.1	0.222999	undirected	MSTRG.11062	MMP9
MSTRG.17538.10	NM_001314269.1	0.220018	undirected	MSTRG.17538	MMP9
XM_018045069.1	XM_018046841.1	0.21701	undirected	L1CAM	ZYX
MSTRG.11062.3	MSTRG.17538.10	0.21685	undirected	MSTRG.11062	MSTRG.17538
XM_005700083.3	XM_018062843.1	0.216635	undirected	LOC102180655	MYBPC2
XM_005685276.3	XM_005700083.3	0.216327	undirected	SLC7A7	LOC102180655
XM_005696300.3	XM_018064920.1	0.21619	undirected	TREM2	ABI3
XM_018060943.1	XM_018061650.1	0.215618	undirected	PISD	TGFB1
MSTRG.13563.9	MSTRG.17538.6	0.215231	undirected	MSTRG.13563	MSTRG.17538
XM_018055949.1	XM_018062843.1	0.215129	undirected	IER5L	MYBPC2
XM_018046841.1	XM_018062555.1	0.215047	undirected	ZYX	BCL3
XM_018042615.1	XM_018046841.1	0.214844	undirected	HIVEP3	ZYX
XM_018045069.1	XM_018061650.1	0.214654	undirected	L1CAM	TGFB1
MSTRG.17538.10	MSTRG.17538.6	0.214513	undirected	MSTRG.17538	MSTRG.17538
XM_005696300.3	XM_018062555.1	0.214262	undirected	TREM2	BCL3
MSTRG.10741.2	XM_005700083.3	0.212986	undirected	MSTRG.10741	LOC102180655
XM_018046841.1	XM_018060943.1	0.212877	undirected	ZYX	PISD
MSTRG.10741.2	XM_018055949.1	0.210972	undirected	MSTRG.10741	IER5L
XM_005685276.3	XM_018064920.1	0.21074	undirected	SLC7A7	ABI3
XM_018039054.1	XM_018046841.1	0.210684	undirected	FOXP4	ZYX
XM_005691841.3	XM_018046841.1	0.210191	undirected	COTL1	ZYX
XM_018061650.1	XM_018062555.1	0.209967	undirected	TGFB1	BCL3
XM_018040800.1	XM_018062555.1	0.209715	undirected	TNFRSF12A	BCL3
XM_018046449.1	XM_018062555.1	0.209619	undirected	MPZL1	BCL3
XM_005696300.3	XM_005700083.3	0.209443	undirected	TREM2	LOC102180655
XM_005699431.3	XM_005700083.3	0.208719	undirected	RAB38	LOC102180655
XM_005699431.3	XM_018064920.1	0.208581	undirected	RAB38	ABI3
MSTRG.13563.9	MSTRG.17538.10	0.208558	undirected	MSTRG.13563	MSTRG.17538
XM_018043536.1	XM_018062555.1	0.208341	undirected	SLC37A2	BCL3
XM_018043536.1	XM_018046841.1	0.208115	undirected	SLC37A2	ZYX
XM_005700083.3	XM_018058858.1	0.208104	undirected	LOC102180655	UCP2
XM_005689507.3	XM_005700083.3	0.208043	undirected	MPZL2	LOC102180655
XM_005693530.3	XM_018060943.1	0.20802	undirected	TP53	PISD
XM_005693530.3	XM_018042615.1	0.20791	undirected	TP53	HIVEP3
XM_005685276.3	XM_018062555.1	0.207709	undirected	SLC7A7	BCL3
XM_005689507.3	XM_018062555.1	0.207619	undirected	MPZL2	BCL3
MSTRG.11062.3	MSTRG.13563.9	0.207573	undirected	MSTRG.11062	MSTRG.13563
XM_005675654.3	XM_018046841.1	0.207454	undirected	LOC102186806	ZYX
MSTRG.3553.2	XM_018064920.1	0.207412	undirected	MSTRG.3553	ABI3
XM_005700083.3	XM_018067245.1	0.207141	undirected	LOC102180655	PLXNB1
XM_018046841.1	XM_018060587.1	0.207096	undirected	ZYX	FBLIM1
XM_018042615.1	XM_018064920.1	0.207084	undirected	HIVEP3	ABI3
XM_018059105.1	XM_018062555.1	0.207026	undirected	SPI1	BCL3
XM_005695706.3	XM_005700083.3	0.206529	undirected	BHLHE40	LOC102180655
XM_018038855.1	XM_018046841.1	0.206328	undirected	PPP1R18	ZYX
XM_005693530.3	XM_018062555.1	0.206066	undirected	TP53	BCL3
MSTRG.1488.12	XM_018046841.1	0.20592	undirected	MSTRG.1488	ZYX
XM_018042615.1	XM_018061650.1	0.205817	undirected	HIVEP3	TGFB1
XM_005691841.3	XM_018051426.1	0.205648	undirected	COTL1	IFI30
XM_018048579.1	XM_018061650.1	0.20543	undirected	CHD4	TGFB1
XM_018039054.1	XM_018060866.1	0.205396	undirected	FOXP4	ARL8A
XM_018058858.1	XM_018064920.1	0.205338	undirected	UCP2	ABI3
XM_018046841.1	XM_018062752.1	0.20526	undirected	ZYX	FTL
XM_018044268.1	XM_018062555.1	0.205242	undirected	SLITRK2	BCL3
XM_018039054.1	XM_018061650.1	0.205237	undirected	FOXP4	TGFB1
XM_018046841.1	XM_018050464.1	0.205046	undirected	ZYX	SBNO2
XM_018043536.1	XM_018061650.1	0.205045	undirected	SLC37A2	TGFB1
XM_018051426.1	XM_018062555.1	0.204662	undirected	IFI30	BCL3
XM_018046841.1	XM_018063299.1	0.204583	undirected	ZYX	GRAMD1A
XM_018039054.1	XM_018062555.1	0.204498	undirected	FOXP4	BCL3
XM_005700083.3	XM_018059167.1	0.204245	undirected	LOC102180655	DGKZ
XM_018038855.1	XM_018062555.1	0.204216	undirected	PPP1R18	BCL3
XM_005700083.3	XM_005709702.3	0.204109	undirected	LOC102180655	TACSTD2
XM_018060587.1	XM_018061650.1	0.203993	undirected	FBLIM1	TGFB1
XM_005691841.3	XM_005696300.3	0.203983	undirected	COTL1	TREM2
XM_018055949.1	XM_018067245.1	0.203979	undirected	IER5L	PLXNB1
XM_005691841.3	XM_018061650.1	0.20392	undirected	COTL1	TGFB1
XM_005696532.3	XM_018061650.1	0.203736	undirected	GPSM3	TGFB1
XM_018045069.1	XM_018062555.1	0.203482	undirected	L1CAM	BCL3
XM_018042615.1	XM_018060866.1	0.203439	undirected	HIVEP3	ARL8A
XM_013968979.2	XM_018055949.1	0.203437	undirected	SNAI1	IER5L
XM_018046449.1	XM_018046841.1	0.203382	undirected	MPZL1	ZYX
XM_018046841.1	XM_018056094.1	0.203345	undirected	ZYX	SEPN1
XM_018046841.1	XM_018048579.1	0.203192	undirected	ZYX	CHD4
XM_005693530.3	XM_018045069.1	0.203191	undirected	TP53	L1CAM
XM_005691841.3	XM_018042615.1	0.203172	undirected	COTL1	HIVEP3
XM_005700083.3	XM_018042615.1	0.203093	undirected	LOC102180655	HIVEP3
XM_005693517.3	XM_018064920.1	0.203091	undirected	CD68	ABI3
XM_018051426.1	XM_018064920.1	0.202625	undirected	IFI30	ABI3
XM_005696532.3	XM_018046841.1	0.202377	undirected	GPSM3	ZYX
XM_018044268.1	XM_018046841.1	0.202269	undirected	SLITRK2	ZYX
XM_018039052.1	XM_018046841.1	0.202261	undirected	FOXP4	ZYX
XM_005700083.3	XM_018045143.1	0.202198	undirected	LOC102180655	PLP2
XM_005675654.3	XM_018061650.1	0.202167	undirected	LOC102186806	TGFB1
XM_005700083.3	XM_013968979.2	0.201982	undirected	LOC102180655	SNAI1
XM_005691841.3	XM_018044268.1	0.201952	undirected	COTL1	SLITRK2
XM_005700083.3	XM_018063768.1	0.201941	undirected	LOC102180655	EVPL
XM_018062555.1	XM_018064576.1	0.201902	undirected	BCL3	NLGN2
XM_018038855.1	XM_018061650.1	0.201839	undirected	PPP1R18	TGFB1
XM_018060866.1	XM_018062555.1	0.20171	undirected	ARL8A	BCL3
XM_018042121.1	XM_018046841.1	0.201686	undirected	ZNF703	ZYX
XM_005696300.3	XM_018046841.1	0.201286	undirected	TREM2	ZYX
XM_018055956.1	XM_018062555.1	0.201217	undirected	PTGES	BCL3
XM_018042121.1	XM_018061650.1	0.201177	undirected	ZNF703	TGFB1
XM_005691841.3	XM_018043536.1	0.20107	undirected	COTL1	SLC37A2
XM_018044268.1	XM_018061650.1	0.200994	undirected	SLITRK2	TGFB1
XM_018056094.1	XM_018061650.1	0.200713	undirected	SEPN1	TGFB1
XM_013975786.2	XM_018046841.1	0.20065	undirected	LDH-A	ZYX

## Sheet: cyan
fromNode	toNode	weight	direction	fromAltName	toAltName
XM_018050197.1	XM_018066369.1	0.541912	undirected	YIPF5	MORF4L1
XM_018038877.1	XM_018050197.1	0.539393	undirected	LOC102176782	YIPF5
XM_018054631.1	XM_018066369.1	0.537476	undirected	CHMP4A	MORF4L1
XM_005674713.3	XM_018050197.1	0.537361	undirected	CCT8	YIPF5
XM_018044770.1	XM_018066369.1	0.53542	undirected	IDH3G	MORF4L1
XM_013976446.2	XM_018066369.1	0.535095	undirected	PQBP1	MORF4L1
XM_018038877.1	XM_018054631.1	0.53463	undirected	LOC102176782	CHMP4A
XM_005675826.3	XM_018066369.1	0.533976	undirected	PLEKHB2	MORF4L1
XM_005695434.3	XM_018066369.1	0.533953	undirected	BAG5	MORF4L1
XM_018054991.1	XM_018066369.1	0.533804	undirected	AUP1	MORF4L1
XM_005697819.3	XM_018066369.1	0.533293	undirected	POP7	MORF4L1
XM_005674713.3	XM_018054631.1	0.533168	undirected	CCT8	CHMP4A
MSTRG.2561.1	XM_018066369.1	0.533062	undirected	MSTRG.2561	MORF4L1
XM_013976446.2	XM_018038877.1	0.532909	undirected	PQBP1	LOC102176782
XM_018047587.1	XM_018066369.1	0.532753	undirected	CSRP2	MORF4L1
XM_018038877.1	XM_018044770.1	0.532743	undirected	LOC102176782	IDH3G
XM_018048639.1	XM_018066369.1	0.532465	undirected	FKBP4	MORF4L1
XM_018065650.1	XM_018066369.1	0.532457	undirected	EXOC3	MORF4L1
MSTRG.2561.1	XM_018050197.1	0.532116	undirected	MSTRG.2561	YIPF5
XM_018046393.1	XM_018066369.1	0.532099	undirected	USF1	MORF4L1
XM_005675826.3	XM_018038877.1	0.531781	undirected	PLEKHB2	LOC102176782
XM_005695434.3	XM_018038877.1	0.531698	undirected	BAG5	LOC102176782
XM_018057597.1	XM_018066369.1	0.531657	undirected	LSM14B	MORF4L1
MSTRG.4287.1	XM_018066369.1	0.531515	undirected	MSTRG.4287	MORF4L1
XM_018038877.1	XM_018054991.1	0.531472	undirected	LOC102176782	AUP1
XM_018046776.1	XM_018066369.1	0.531411	undirected	REPIN1	MORF4L1
XM_018046695.1	XM_018050197.1	0.531382	undirected	NUB1	YIPF5
XM_018053566.1	XM_018066369.1	0.531225	undirected	UACA	MORF4L1
XM_018038764.1	XM_018066369.1	0.531006	undirected	BAG6	MORF4L1
XM_005697819.3	XM_018038877.1	0.530868	undirected	POP7	LOC102176782
XM_005674713.3	XM_018044770.1	0.530826	undirected	CCT8	IDH3G
MSTRG.2561.1	XM_018038877.1	0.530821	undirected	MSTRG.2561	LOC102176782
MSTRG.1851.1	XM_018066369.1	0.530796	undirected	MSTRG.1851	MORF4L1
XM_018038877.1	XM_018047587.1	0.530641	undirected	LOC102176782	CSRP2
XM_005674713.3	XM_018066369.1	0.530513	undirected	CCT8	MORF4L1
XM_018066369.1	XM_018066977.1	0.530497	undirected	MORF4L1	ATG7
XM_005674713.3	XM_013976446.2	0.530418	undirected	CCT8	PQBP1
XM_018038877.1	XM_018065650.1	0.530294	undirected	LOC102176782	EXOC3
XM_018038877.1	XM_018046393.1	0.529985	undirected	LOC102176782	USF1
XM_018038877.1	XM_018048639.1	0.529867	undirected	LOC102176782	FKBP4
XM_018048294.1	XM_018066369.1	0.529694	undirected	MPST	MORF4L1
XM_005674713.3	XM_018048639.1	0.529675	undirected	CCT8	FKBP4
MSTRG.2561.1	XM_018054631.1	0.529463	undirected	MSTRG.2561	CHMP4A
XM_018038877.1	XM_018057597.1	0.529449	undirected	LOC102176782	LSM14B
XM_005674713.3	XM_018054991.1	0.529376	undirected	CCT8	AUP1
MSTRG.4287.1	XM_018038877.1	0.529243	undirected	MSTRG.4287	LOC102176782
XM_005674713.3	XM_005675826.3	0.529191	undirected	CCT8	PLEKHB2
XM_005675826.3	XM_018050197.1	0.529131	undirected	PLEKHB2	YIPF5
XM_018038877.1	XM_018053566.1	0.529111	undirected	LOC102176782	UACA
XM_018038877.1	XM_018046776.1	0.5291	undirected	LOC102176782	REPIN1
MSTRG.14076.19	XM_018050197.1	0.528991	undirected	MSTRG.14076	YIPF5
XM_005674713.3	XM_005695434.3	0.528869	undirected	CCT8	BAG5
XM_018038764.1	XM_018038877.1	0.528845	undirected	BAG6	LOC102176782
MSTRG.1851.1	XM_018038877.1	0.528619	undirected	MSTRG.1851	LOC102176782
XM_018038877.1	XM_018066977.1	0.528605	undirected	LOC102176782	ATG7
XM_005674713.3	XM_005697819.3	0.528429	undirected	CCT8	POP7
XM_018066369.1	XR_001917223.1	0.528385	undirected	MORF4L1	SRRM2
XM_005674713.3	XM_018038877.1	0.528371	undirected	CCT8	LOC102176782
MSTRG.2561.1	XM_005674713.3	0.528357	undirected	MSTRG.2561	CCT8
MSTRG.14647.3	XM_018066369.1	0.528215	undirected	MSTRG.14647	MORF4L1
XM_005674713.3	XM_018046776.1	0.527977	undirected	CCT8	REPIN1
XM_005674713.3	XM_018047587.1	0.527878	undirected	CCT8	CSRP2
XM_018045695.1	XM_018050197.1	0.527813	undirected	SH3GLB1	YIPF5
XM_018038877.1	XM_018066369.1	0.527794	undirected	LOC102176782	MORF4L1
XM_018057391.1	XM_018066369.1	0.527614	undirected	MAVS	MORF4L1
XM_005674713.3	XM_018065650.1	0.527482	undirected	CCT8	EXOC3
XM_005674713.3	XM_018046393.1	0.527445	undirected	CCT8	USF1
XM_018047704.1	XM_018066369.1	0.527335	undirected	TNS2	MORF4L1
XM_005674713.3	XM_018057597.1	0.527297	undirected	CCT8	LSM14B
XM_018050197.1	XM_018054119.1	0.527296	undirected	YIPF5	LGALS3
XM_018038877.1	XM_018048294.1	0.527257	undirected	LOC102176782	MPST
MSTRG.4287.1	XM_005674713.3	0.527019	undirected	MSTRG.4287	CCT8
XM_018046695.1	XM_018054631.1	0.526912	undirected	NUB1	CHMP4A
XM_005674713.3	XM_018053566.1	0.526705	undirected	CCT8	UACA
XM_013976446.2	XM_018046695.1	0.526482	undirected	PQBP1	NUB1
XM_005674713.3	XM_018066977.1	0.526403	undirected	CCT8	ATG7
XM_005674713.3	XM_018038764.1	0.526238	undirected	CCT8	BAG6
XM_018038877.1	XR_001917223.1	0.526201	undirected	LOC102176782	SRRM2
MSTRG.2561.1	XM_018054991.1	0.526183	undirected	MSTRG.2561	AUP1
MSTRG.14647.3	XM_018038877.1	0.526112	undirected	MSTRG.14647	LOC102176782
MSTRG.2561.1	XM_018048639.1	0.526083	undirected	MSTRG.2561	FKBP4
MSTRG.1851.1	XM_005674713.3	0.526074	undirected	MSTRG.1851	CCT8
XM_018039836.1	XM_018066369.1	0.525934	undirected	STK25	MORF4L1
XM_018050197.1	XM_018050348.1	0.525821	undirected	YIPF5	TGFBI
XM_005674713.3	XM_018048294.1	0.525611	undirected	CCT8	MPST
XM_018044770.1	XM_018046695.1	0.525533	undirected	IDH3G	NUB1
XM_005675826.3	XM_018054631.1	0.525388	undirected	PLEKHB2	CHMP4A
XM_018038877.1	XM_018047704.1	0.525242	undirected	LOC102176782	TNS2
XM_018038567.1	XM_018066369.1	0.525105	undirected	BRD2	MORF4L1
XM_018038877.1	XM_018057391.1	0.524997	undirected	LOC102176782	MAVS
XM_018046695.1	XM_018054991.1	0.524994	undirected	NUB1	AUP1
MSTRG.2561.1	XM_018044770.1	0.52499	undirected	MSTRG.2561	IDH3G
XM_005675826.3	XM_018046695.1	0.524952	undirected	PLEKHB2	NUB1
XM_018041992.1	XM_018066369.1	0.524921	undirected	CLN8	MORF4L1
XM_005692248.3	XM_018066369.1	0.524827	undirected	KIAA0355	MORF4L1
XM_018044875.1	XM_018066369.1	0.524814	undirected	WDR13	MORF4L1
XM_018061688.1	XM_018066369.1	0.524757	undirected	RALB	MORF4L1
XM_005695434.3	XM_018046695.1	0.524571	undirected	BAG5	NUB1
MSTRG.14076.19	XM_013976446.2	0.524461	undirected	MSTRG.14076	PQBP1
XM_013976446.2	XM_018054119.1	0.524387	undirected	PQBP1	LGALS3

## Sheet: darkgreen
fromNode	toNode	weight	direction	fromAltName	toAltName
XM_005678362.3	XM_005689658.3	0.217396	undirected	DHCR24	PDE3B
XM_005678362.3	XM_013970480.2	0.203965	undirected	DHCR24	MSMO1
XM_005678362.3	XM_013974033.2	0.199569	undirected	DHCR24	BTN1A1
MSTRG.3990.3	XM_005678362.3	0.195162	undirected	MSTRG.3990	DHCR24
XM_005678362.3	XM_013973866.2	0.177015	undirected	DHCR24	OARD1
XM_005689658.3	XM_013974033.2	0.176903	undirected	PDE3B	BTN1A1
XM_005678362.3	XM_005698386.3	0.176506	undirected	DHCR24	PI4K2A
XM_005678362.3	XM_005696381.3	0.174886	undirected	DHCR24	ADGRF5
XM_005678362.3	XM_005709739.3	0.172099	undirected	DHCR24	PNPLA3
XM_005678362.3	XM_018039637.1	0.169886	undirected	DHCR24	LAMA3
MSTRG.3990.3	XM_013974033.2	0.164137	undirected	MSTRG.3990	BTN1A1
XM_013970480.2	XM_013974033.2	0.163915	undirected	MSMO1	BTN1A1
XM_005678362.3	XM_005686080.3	0.163597	undirected	DHCR24	ISCA2
XM_005678362.3	XM_013975890.2	0.162777	undirected	DHCR24	LOC102180465
MSTRG.2908.2	XM_005678362.3	0.162217	undirected	MSTRG.2908	DHCR24
XM_005678362.3	XM_018054191.1	0.15847	undirected	DHCR24	SPPL2A
XM_005678362.3	XM_018064499.1	0.156013	undirected	DHCR24	PLD2
XM_005678362.3	XM_018064888.1	0.155787	undirected	DHCR24	XYLT2
XM_013973866.2	XM_013974033.2	0.151467	undirected	OARD1	BTN1A1
MSTRG.17689.1	XM_018041092.1	0.150344	undirected	MSTRG.17689	C3H2orf82
MSTRG.3012.1	XM_005678362.3	0.150104	undirected	MSTRG.3012	DHCR24
MSTRG.2205.1	XM_005678362.3	0.148797	undirected	MSTRG.2205	DHCR24
MSTRG.8297.3	XM_005678362.3	0.148639	undirected	MSTRG.8297	DHCR24
MSTRG.17689.1	XM_005678362.3	0.147985	undirected	MSTRG.17689	DHCR24
MSTRG.3990.5	XM_005678362.3	0.146951	undirected	MSTRG.3990	DHCR24
XM_005678362.3	XM_005680667.3	0.145651	undirected	DHCR24	NCF4
XM_005678362.3	XM_018041092.1	0.14548	undirected	DHCR24	C3H2orf82
XM_005678362.3	XM_018049577.1	0.145143	undirected	DHCR24	PLS1
XM_005678362.3	XM_018058371.1	0.142999	undirected	DHCR24	RAD21
XM_005676046.3	XM_005678362.3	0.14297	undirected	DPP4	DHCR24
MSTRG.3990.5	XM_013974033.2	0.142192	undirected	MSTRG.3990	BTN1A1
XM_005698386.3	XM_013974033.2	0.141382	undirected	PI4K2A	BTN1A1
XM_005709739.3	XM_013974033.2	0.139763	undirected	PNPLA3	BTN1A1
XM_013974033.2	XM_013975890.2	0.138704	undirected	BTN1A1	LOC102180465
XM_005678362.3	XM_018039453.1	0.1381	undirected	DHCR24	NARS
MSTRG.2205.1	XM_013974033.2	0.137735	undirected	MSTRG.2205	BTN1A1
XM_005678362.3	XM_013966415.2	0.13722	undirected	DHCR24	TRAPPC3L
XM_005678362.3	XM_005686324.3	0.136821	undirected	DHCR24	MRPL53
XM_013974033.2	XM_018064888.1	0.13588	undirected	BTN1A1	XYLT2
XM_005678362.3	XM_018048390.1	0.13521	undirected	DHCR24	KRAS
XM_005678362.3	XM_005690127.3	0.134966	undirected	DHCR24	HSD17B12
MSTRG.2908.2	XM_013974033.2	0.134815	undirected	MSTRG.2908	BTN1A1
XM_005678362.3	XM_005682919.3	0.134676	undirected	DHCR24	LOC102168533
XM_005678362.3	XM_005698163.3	0.134435	undirected	DHCR24	PRKG1
XM_005678362.3	XM_005681129.2	0.134037	undirected	DHCR24	SMDT1
XM_005678362.3	XM_018053819.1	0.133667	undirected	DHCR24	LOC102168547
XM_005678362.3	XM_018065406.1	0.133592	undirected	DHCR24	LOC108638312
XM_013974033.2	XM_018039637.1	0.132831	undirected	BTN1A1	LAMA3
XM_013974033.2	XM_018054191.1	0.132232	undirected	BTN1A1	SPPL2A
XM_005678362.3	XM_018039572.1	0.131928	undirected	DHCR24	C24H18orf25
MSTRG.17689.1	XM_013974033.2	0.131652	undirected	MSTRG.17689	BTN1A1
XM_005675552.3	XM_005678362.3	0.131637	undirected	LOC102172488	DHCR24
XM_013974033.2	XM_018039453.1	0.131381	undirected	BTN1A1	NARS
XM_005680667.3	XM_013974033.2	0.130598	undirected	NCF4	BTN1A1
XM_005696381.3	XM_013974033.2	0.130454	undirected	ADGRF5	BTN1A1
XM_013970480.2	XM_018039453.1	0.130212	undirected	MSMO1	NARS
XM_018039453.1	XM_018041092.1	0.130041	undirected	NARS	C3H2orf82
XM_005686080.3	XM_013974033.2	0.129196	undirected	ISCA2	BTN1A1
XM_018039453.1	XM_018064888.1	0.128826	undirected	NARS	XYLT2
MSTRG.3012.1	XM_013974033.2	0.128655	undirected	MSTRG.3012	BTN1A1
XM_005679983.3	XM_005699882.3	0.127918	undirected	TMBIM6	TM7SF2
MSTRG.17689.1	XM_013970480.2	0.127604	undirected	MSTRG.17689	MSMO1
XM_013974033.2	XM_018041092.1	0.126911	undirected	BTN1A1	C3H2orf82
XM_005678362.3	XM_018057345.1	0.126788	undirected	DHCR24	LOC102191533
XM_013966415.2	XM_013974033.2	0.126401	undirected	TRAPPC3L	BTN1A1
MSTRG.17689.1	XM_013966415.2	0.126379	undirected	MSTRG.17689	TRAPPC3L
MSTRG.17689.1	XM_018039453.1	0.126337	undirected	MSTRG.17689	NARS
XM_005678362.3	XM_018042655.1	0.125223	undirected	DHCR24	PPCS
MSTRG.3990.3	XM_018039453.1	0.125011	undirected	MSTRG.3990	NARS
XM_005678362.3	XM_005691143.3	0.124774	undirected	DHCR24	MSMO1
MSTRG.17689.1	XM_018047979.1	0.124759	undirected	MSTRG.17689	TMBIM4
XM_013974033.2	XM_018048390.1	0.124745	undirected	BTN1A1	KRAS
XM_018039453.1	XM_018039572.1	0.124309	undirected	NARS	C24H18orf25
XM_005679983.3	XM_005687598.3	0.123816	undirected	TMBIM6	EBPL
XM_005678362.3	XM_018042471.1	0.123802	undirected	DHCR24	SFTPD
XM_005691142.3	XM_005691143.3	0.123784	undirected	MSMO1	MSMO1
XM_005678362.3	XM_018049353.1	0.12338	undirected	DHCR24	STIM2
MSTRG.4029.12	XM_005678362.3	0.123044	undirected	MSTRG.4029	DHCR24
XM_005689658.3	XM_018039453.1	0.122893	undirected	PDE3B	NARS
MSTRG.17689.1	XM_018048390.1	0.122568	undirected	MSTRG.17689	KRAS
XM_005678362.3	XM_005700717.3	0.122512	undirected	DHCR24	YIPF6
MSTRG.17689.1	XM_005680667.3	0.122469	undirected	MSTRG.17689	NCF4
XM_005680667.3	XM_018039453.1	0.122103	undirected	NCF4	NARS
XM_005680667.3	XM_018047979.1	0.12158	undirected	NCF4	TMBIM4
XM_005691143.3	XM_018047979.1	0.119806	undirected	MSMO1	TMBIM4
XM_005678362.3	XM_018047979.1	0.119542	undirected	DHCR24	TMBIM4
XM_005689658.3	XM_013973866.2	0.119536	undirected	PDE3B	OARD1
MSTRG.4029.12	XM_013974033.2	0.119465	undirected	MSTRG.4029	BTN1A1
XM_013966415.2	XM_018039453.1	0.11941	undirected	TRAPPC3L	NARS
XM_005679983.3	XM_018061365.1	0.119207	undirected	TMBIM6	TMED2
XM_018039453.1	XM_018048390.1	0.119123	undirected	NARS	KRAS
XM_018047979.1	XM_018053725.1	0.118451	undirected	TMBIM4	TMED7
MSTRG.17689.1	XM_005691143.3	0.118065	undirected	MSTRG.17689	MSMO1
XM_013970480.2	XM_018047979.1	0.11804	undirected	MSMO1	TMBIM4
XM_005689658.3	XM_013970480.2	0.117924	undirected	PDE3B	MSMO1
XM_005686080.3	XM_018039453.1	0.117766	undirected	ISCA2	NARS
XM_005694059.3	XM_018047439.1	0.117712	undirected	P4HB	LOC102177400
XM_005691143.3	XM_018041092.1	0.117623	undirected	MSMO1	C3H2orf82
XM_013974033.2	XM_018053819.1	0.117287	undirected	BTN1A1	LOC102168547
XM_005675626.3	XM_018065344.1	0.117276	undirected	IGSF5	CCDC47

## Sheet: lightcyan
fromNode	toNode	weight	direction	fromAltName	toAltName
MSTRG.5949.2	XM_005679457.3	0.481864	undirected	MSTRG.5949	TNPO3
XM_005679457.3	XR_001919240.1	0.481593	undirected	TNPO3	RPL37A
XM_018046212.1	XR_001919240.1	0.48122	undirected	SHC1	RPL37A
MSTRG.5949.2	XM_013975643.2	0.481218	undirected	MSTRG.5949	PPOX
MSTRG.5949.2	XM_005697690.3	0.481217	undirected	MSTRG.5949	PAGR1
MSTRG.12819.2	MSTRG.5949.2	0.480992	undirected	MSTRG.12819	MSTRG.5949
MSTRG.12819.2	XR_001919240.1	0.480987	undirected	MSTRG.12819	RPL37A
MSTRG.16171.36	XM_013975643.2	0.480945	undirected	MSTRG.16171	PPOX
MSTRG.5949.2	XM_018056754.1	0.480907	undirected	MSTRG.5949	SUCLA2
XM_018045752.1	XR_001919240.1	0.480591	undirected	TGFBR3	RPL37A
MSTRG.5949.2	XM_018046212.1	0.480554	undirected	MSTRG.5949	SHC1
XM_005697690.3	XR_001919240.1	0.480537	undirected	PAGR1	RPL37A
MSTRG.5949.2	XM_018045752.1	0.480441	undirected	MSTRG.5949	TGFBR3
XM_018056754.1	XR_001919240.1	0.48042	undirected	SUCLA2	RPL37A
XM_013975643.2	XR_001919240.1	0.480044	undirected	PPOX	RPL37A
MSTRG.5949.2	XM_018055201.1	0.479904	undirected	MSTRG.5949	ECE1
MSTRG.5949.2	XM_018049373.1	0.479777	undirected	MSTRG.5949	FAM114A1
MSTRG.1126.2	MSTRG.5949.2	0.47935	undirected	MSTRG.1126	MSTRG.5949
MSTRG.16171.36	XM_005679457.3	0.47933	undirected	MSTRG.16171	TNPO3
XM_018055201.1	XR_001919240.1	0.479094	undirected	ECE1	RPL37A
MSTRG.5949.2	XM_018040901.1	0.478982	undirected	MSTRG.5949	SH3BP4
MSTRG.12819.2	MSTRG.16171.36	0.478931	undirected	MSTRG.12819	MSTRG.16171
XM_018049373.1	XR_001919240.1	0.478831	undirected	FAM114A1	RPL37A
MSTRG.1126.2	XR_001919240.1	0.478722	undirected	MSTRG.1126	RPL37A
XM_018040901.1	XR_001919240.1	0.478428	undirected	SH3BP4	RPL37A
MSTRG.16171.36	XM_005697690.3	0.478427	undirected	MSTRG.16171	PAGR1
MSTRG.16171.36	XM_018055201.1	0.478394	undirected	MSTRG.16171	ECE1
MSTRG.16171.36	XM_018049373.1	0.478356	undirected	MSTRG.16171	FAM114A1
MSTRG.14685.4	XR_001919240.1	0.478151	undirected	MSTRG.14685	RPL37A
MSTRG.16171.36	XM_018056754.1	0.478029	undirected	MSTRG.16171	SUCLA2
MSTRG.14685.4	MSTRG.5949.2	0.477995	undirected	MSTRG.14685	MSTRG.5949
MSTRG.16171.36	XM_018046212.1	0.477788	undirected	MSTRG.16171	SHC1
MSTRG.16171.36	XM_018045752.1	0.477541	undirected	MSTRG.16171	TGFBR3
MSTRG.5949.2	XM_018061602.1	0.47746	undirected	MSTRG.5949	ARFIP1
XM_018061602.1	XR_001919240.1	0.476906	undirected	ARFIP1	RPL37A
MSTRG.16171.36	XM_018040901.1	0.476811	undirected	MSTRG.16171	SH3BP4
MSTRG.1126.2	MSTRG.16171.36	0.476795	undirected	MSTRG.1126	MSTRG.16171
MSTRG.5949.2	XM_018058848.1	0.476354	undirected	MSTRG.5949	MFF
XM_018058848.1	XR_001919240.1	0.476253	undirected	MFF	RPL37A
MSTRG.16171.36	XM_018056186.1	0.47607	undirected	MSTRG.16171	MRPS2
MSTRG.5949.2	MSTRG.8593.1	0.475994	undirected	MSTRG.5949	MSTRG.8593
MSTRG.2207.8	MSTRG.5949.2	0.475886	undirected	MSTRG.2207	MSTRG.5949
MSTRG.5949.2	XM_018056186.1	0.475856	undirected	MSTRG.5949	MRPS2
MSTRG.8593.1	XR_001919240.1	0.47574	undirected	MSTRG.8593	RPL37A
MSTRG.5949.2	XM_018050841.1	0.47519	undirected	MSTRG.5949	TJP3
MSTRG.2207.8	XR_001919240.1	0.475106	undirected	MSTRG.2207	RPL37A
MSTRG.16171.36	XM_018061602.1	0.474979	undirected	MSTRG.16171	ARFIP1
XM_018050841.1	XR_001919240.1	0.474785	undirected	TJP3	RPL37A
MSTRG.5949.2	XM_018044962.1	0.474716	undirected	MSTRG.5949	TFDP1
XM_018056186.1	XR_001919240.1	0.474541	undirected	MRPS2	RPL37A
MSTRG.16171.36	MSTRG.2207.8	0.474448	undirected	MSTRG.16171	MSTRG.2207
XM_018044962.1	XR_001919240.1	0.473953	undirected	TFDP1	RPL37A
MSTRG.13618.2	MSTRG.5949.2	0.473793	undirected	MSTRG.13618	MSTRG.5949
MSTRG.14685.4	MSTRG.16171.36	0.473747	undirected	MSTRG.14685	MSTRG.16171
MSTRG.16171.36	MSTRG.5949.2	0.473588	undirected	MSTRG.16171	MSTRG.5949
MSTRG.5949.2	XM_018066287.1	0.473477	undirected	MSTRG.5949	CTAGE5
MSTRG.13618.2	XR_001919240.1	0.473195	undirected	MSTRG.13618	RPL37A
MSTRG.5949.2	XM_013972491.2	0.472959	undirected	MSTRG.5949	LANCL1
MSTRG.16171.36	XR_001919240.1	0.4729	undirected	MSTRG.16171	RPL37A
MSTRG.16171.36	XM_018044962.1	0.472759	undirected	MSTRG.16171	TFDP1
MSTRG.16171.36	XM_018058848.1	0.472722	undirected	MSTRG.16171	MFF
MSTRG.5303.11	XR_001919240.1	0.472674	undirected	MSTRG.5303	RPL37A
MSTRG.16171.36	MSTRG.8593.1	0.472637	undirected	MSTRG.16171	MSTRG.8593
XM_013972491.2	XR_001919240.1	0.472518	undirected	LANCL1	RPL37A
MSTRG.5949.2	XM_018050733.1	0.472448	undirected	MSTRG.5949	PDLIM4
MSTRG.5303.11	MSTRG.5949.2	0.472381	undirected	MSTRG.5303	MSTRG.5949
XM_018050733.1	XR_001919240.1	0.472243	undirected	PDLIM4	RPL37A
MSTRG.13618.2	MSTRG.16171.36	0.472168	undirected	MSTRG.13618	MSTRG.16171
MSTRG.16171.36	XM_018050841.1	0.472132	undirected	MSTRG.16171	TJP3
XM_018066287.1	XR_001919240.1	0.472094	undirected	CTAGE5	RPL37A
MSTRG.12204.2	MSTRG.5949.2	0.47177	undirected	MSTRG.12204	MSTRG.5949
MSTRG.16171.36	XM_018066287.1	0.471752	undirected	MSTRG.16171	CTAGE5
MSTRG.16171.36	XM_013972491.2	0.47142	undirected	MSTRG.16171	LANCL1
MSTRG.12204.2	XR_001919240.1	0.471094	undirected	MSTRG.12204	RPL37A
MSTRG.3775.4	MSTRG.5949.2	0.470638	undirected	MSTRG.3775	MSTRG.5949
XM_013966670.2	XM_013975643.2	0.470589	undirected	TMPRSS2	PPOX
XM_013975643.2	XM_018067201.1	0.470342	undirected	PPOX	DBNL
MSTRG.5949.2	XR_001919240.1	0.47016	undirected	MSTRG.5949	RPL37A
MSTRG.3775.4	XR_001919240.1	0.470048	undirected	MSTRG.3775	RPL37A
XM_005679457.3	XM_013966670.2	0.469745	undirected	TNPO3	TMPRSS2
MSTRG.16171.36	XM_013974644.2	0.469634	undirected	MSTRG.16171	HSD3B7
MSTRG.12204.2	MSTRG.16171.36	0.469545	undirected	MSTRG.12204	MSTRG.16171
XM_005697690.3	XM_013966670.2	0.469	undirected	PAGR1	TMPRSS2
MSTRG.16171.36	XM_018050733.1	0.468861	undirected	MSTRG.16171	PDLIM4
MSTRG.5949.2	XM_013966670.2	0.468793	undirected	MSTRG.5949	TMPRSS2
XM_013966670.2	XM_018056754.1	0.46879	undirected	TMPRSS2	SUCLA2
XM_013966670.2	XM_018055201.1	0.468473	undirected	TMPRSS2	ECE1
MSTRG.5413.1	MSTRG.5949.2	0.468197	undirected	MSTRG.5413	MSTRG.5949
XM_013966670.2	XM_018049373.1	0.468157	undirected	TMPRSS2	FAM114A1
MSTRG.12819.2	XM_013966670.2	0.468148	undirected	MSTRG.12819	TMPRSS2
XM_013966670.2	XR_001919240.1	0.468124	undirected	TMPRSS2	RPL37A
MSTRG.16171.36	MSTRG.3775.4	0.468061	undirected	MSTRG.16171	MSTRG.3775
MSTRG.16171.36	MSTRG.5303.11	0.46805	undirected	MSTRG.16171	MSTRG.5303
MSTRG.1126.2	XM_013966670.2	0.467997	undirected	MSTRG.1126	TMPRSS2
MSTRG.5949.2	MSTRG.9236.8	0.467948	undirected	MSTRG.5949	MSTRG.9236
MSTRG.9236.8	XR_001919240.1	0.467937	undirected	MSTRG.9236	RPL37A
MSTRG.5949.2	XM_013974644.2	0.467913	undirected	MSTRG.5949	HSD3B7
MSTRG.12819.2	XM_018067201.1	0.467619	undirected	MSTRG.12819	DBNL
MSTRG.5949.2	XM_018039953.1	0.467449	undirected	MSTRG.5949	INO80E
XM_013966670.2	XM_018040901.1	0.467439	undirected	TMPRSS2	SH3BP4

## Sheet: lightgreen
fromNode	toNode	weight	direction	fromAltName	toAltName
XM_005676405.3	XM_005691063.3	0.200148	undirected	ICOS	PTPRC
XM_005691063.3	XM_018042914.1	0.186554	undirected	PTPRC	PTPRCAP
XM_005691063.3	XM_005697627.3	0.182003	undirected	PTPRC	IL21R
XM_005691063.3	XM_013972232.2	0.18005	undirected	PTPRC	IKZF3
XM_005674899.3	XM_005691063.3	0.179731	undirected	LOC102175896	PTPRC
MSTRG.3620.2	XM_005691063.3	0.179123	undirected	MSTRG.3620	PTPRC
XM_005691063.3	XM_018057753.1	0.178213	undirected	PTPRC	LCK
XM_005691063.3	XM_005697703.3	0.177573	undirected	PTPRC	2022-09-01
XM_005676405.3	XM_005700371.3	0.177528	undirected	ICOS	SASH3
XM_005691063.3	XM_005693201.3	0.176361	undirected	PTPRC	CCL5
XM_005689510.3	XM_005700371.3	0.175692	undirected	CD3D	SASH3
MSTRG.2426.2	XM_005691063.3	0.175146	undirected	MSTRG.2426	PTPRC
XM_005689510.3	XM_005691063.3	0.173966	undirected	CD3D	PTPRC
MSTRG.2426.2	XM_005676405.3	0.173169	undirected	MSTRG.2426	ICOS
XM_005691063.3	XM_018062026.1	0.172752	undirected	PTPRC	NLRC5
XM_005693201.3	XM_005700371.3	0.172206	undirected	CCL5	SASH3
XM_005691063.3	XM_018051835.1	0.171873	undirected	PTPRC	BLK
XM_005681847.3	XM_005691063.3	0.171681	undirected	PLAC8	PTPRC
XM_005697703.3	XM_005700371.3	0.171608	undirected	2022-09-01	SASH3
XM_005676405.3	XM_018064263.1	0.171248	undirected	ICOS	CRLF3
XM_018042914.1	XM_018057753.1	0.17112	undirected	PTPRCAP	LCK
MSTRG.167.1	XM_005691063.3	0.170916	undirected	MSTRG.167	PTPRC
MSTRG.5220.1	XM_005691063.3	0.17028	undirected	MSTRG.5220	PTPRC
XM_005676405.3	XM_018057753.1	0.170069	undirected	ICOS	LCK
XM_005676405.3	XM_018046445.1	0.169954	undirected	ICOS	RCSD1
XM_005677920.3	XM_005689510.3	0.169883	undirected	CD53	CD3D
XM_005691063.3	XM_005696604.3	0.169286	undirected	PTPRC	LTB
XM_005675001.3	XM_005697627.3	0.16896	undirected	HCLS1	IL21R
XM_005697627.3	XM_005700371.3	0.168815	undirected	IL21R	SASH3
XM_005700681.3	XM_013963731.2	0.168734	undirected	IL2RG	NCKAP1L
XM_005691063.3	XM_005693997.3	0.168503	undirected	PTPRC	CD79B
XM_005696038.2	XM_013972232.2	0.168213	undirected	CCR5	IKZF3
XM_005676907.3	XM_005691063.3	0.167979	undirected	LOC108633234	PTPRC
XM_005677920.3	XM_005700681.3	0.167964	undirected	CD53	IL2RG
XM_005676405.3	XM_005696038.2	0.167147	undirected	ICOS	CCR5
XM_005700371.3	XM_018062026.1	0.167088	undirected	SASH3	NLRC5
XM_005676405.3	XM_013972232.2	0.166974	undirected	ICOS	IKZF3
XM_005675001.3	XM_005676405.3	0.16689	undirected	HCLS1	ICOS
MSTRG.5220.1	XM_005675001.3	0.16659	undirected	MSTRG.5220	HCLS1
XM_005700371.3	XM_018059036.1	0.16597	undirected	SASH3	LPXN
XM_005700371.3	XM_013972232.2	0.165826	undirected	SASH3	IKZF3
XM_005676405.3	XM_005694594.3	0.165476	undirected	ICOS	NAIP
XM_005691063.3	XM_005696038.2	0.165263	undirected	PTPRC	CCR5
XM_005696038.2	XM_005697627.3	0.165117	undirected	CCR5	IL21R
XM_005677920.3	XM_005697703.3	0.164732	undirected	CD53	2022-09-01
MSTRG.3620.2	XM_005700371.3	0.164665	undirected	MSTRG.3620	SASH3
XM_005677920.3	XM_005700371.3	0.164601	undirected	CD53	SASH3
XM_005691063.3	XM_018059036.1	0.164455	undirected	PTPRC	LPXN
XM_005675001.3	XM_013972232.2	0.164269	undirected	HCLS1	IKZF3
XM_005691063.3	XM_013964197.2	0.164178	undirected	PTPRC	LAMP3
XM_005683187.2	XM_005691063.3	0.164095	undirected	CCDC69	PTPRC
XM_005691063.3	XM_005699347.3	0.164073	undirected	PTPRC	WDFY4
XM_005676405.3	XM_018065716.1	0.163388	undirected	ICOS	DOCK2
MSTRG.2426.2	XM_005696038.2	0.163198	undirected	MSTRG.2426	CCR5
XM_005694594.3	XM_005697627.3	0.162942	undirected	NAIP	IL21R
XM_005691063.3	XM_018046445.1	0.162745	undirected	PTPRC	RCSD1
XM_005677920.3	XM_018045594.1	0.162735	undirected	CD53	LOC102179822
XM_005700371.3	XM_018064958.1	0.16267	undirected	SASH3	TBX21
XM_005697627.3	XM_018046445.1	0.162622	undirected	IL21R	RCSD1
XM_005677920.3	XM_005693201.3	0.16259	undirected	CD53	CCL5
XM_005675001.3	XM_005697703.3	0.162568	undirected	HCLS1	2022-09-01
XM_005691063.3	XM_005700371.3	0.162542	undirected	PTPRC	SASH3
MSTRG.2426.2	XM_018042914.1	0.162359	undirected	MSTRG.2426	PTPRCAP
XM_005696038.2	XM_018057753.1	0.162347	undirected	CCR5	LCK
XM_005694594.3	XM_013972232.2	0.162301	undirected	NAIP	IKZF3
XM_005675001.3	XM_018059036.1	0.162177	undirected	HCLS1	LPXN
MSTRG.2426.2	MSTRG.3620.2	0.162143	undirected	MSTRG.2426	MSTRG.3620
XM_018051835.1	XM_018065716.1	0.162115	undirected	BLK	DOCK2
XM_005675001.3	XM_005693201.3	0.16193	undirected	HCLS1	CCL5
MSTRG.5220.1	XM_005694594.3	0.161756	undirected	MSTRG.5220	NAIP
XM_005677920.3	XM_018059036.1	0.161436	undirected	CD53	LPXN
XM_005691063.3	XM_018053331.1	0.161406	undirected	PTPRC	ZC3H12D
XM_005677920.3	XM_005697627.3	0.161154	undirected	CD53	IL21R
XM_013963731.2	XM_018059036.1	0.161134	undirected	NCKAP1L	LPXN
XM_005700371.3	XM_013963731.2	0.161112	undirected	SASH3	NCKAP1L
XM_005675001.3	XM_013963731.2	0.160649	undirected	HCLS1	NCKAP1L
XM_005700371.3	XM_018042914.1	0.160564	undirected	SASH3	PTPRCAP
XM_005675001.3	XM_005689510.3	0.160509	undirected	HCLS1	CD3D
XM_005675001.3	XM_005696038.2	0.160497	undirected	HCLS1	CCR5
XM_005675001.3	XM_005677920.3	0.160494	undirected	HCLS1	CD53
XM_005696038.2	XM_005697703.3	0.160452	undirected	CCR5	2022-09-01
XM_013972232.2	XM_018064263.1	0.160433	undirected	IKZF3	CRLF3
XM_013972232.2	XM_018046445.1	0.160428	undirected	IKZF3	RCSD1
XM_005700371.3	XM_018046309.1	0.160256	undirected	SASH3	SH2D2A
XM_005675001.3	XM_005691063.3	0.160048	undirected	HCLS1	PTPRC
XM_013963731.2	XM_018038268.1	0.160018	undirected	NCKAP1L	NUP210
XM_005693201.3	XM_005696038.2	0.159797	undirected	CCL5	CCR5
XM_005691063.3	XM_018064263.1	0.159648	undirected	PTPRC	CRLF3
XM_005674899.3	XM_018065716.1	0.159476	undirected	LOC102175896	DOCK2
XM_005691063.3	XM_018046309.1	0.159376	undirected	PTPRC	SH2D2A
XM_005674899.3	XM_018057753.1	0.159339	undirected	LOC102175896	LCK
XM_005675001.3	XM_005681847.3	0.159301	undirected	HCLS1	PLAC8
XM_005676907.3	XM_005689511.3	0.159294	undirected	LOC108633234	CD3G
MSTRG.7125.2	XM_005691063.3	0.159288	undirected	MSTRG.7125	PTPRC
XM_005689511.3	XM_005691063.3	0.159151	undirected	CD3G	PTPRC
XM_005691063.3	XM_018049268.1	0.158971	undirected	PTPRC	BANK1
XM_005700970.2	XM_013963731.2	0.158883	undirected	CXHXorf21	NCKAP1L
XM_005681847.3	XM_005696038.2	0.158752	undirected	PLAC8	CCR5
XM_005693201.3	XM_005694594.3	0.158705	undirected	CCL5	NAIP
MSTRG.5823.1	XM_005691063.3	0.158697	undirected	MSTRG.5823	PTPRC

## Sheet: magenta
fromNode	toNode	weight	direction	fromAltName	toAltName
MSTRG.13941.5	MSTRG.16372.1	0.16215	undirected	MSTRG.13941	MSTRG.16372
XM_018047851.1	XM_018067224.1	0.161432	undirected	FKBP11	RPN1
XM_005686372.3	XM_018067224.1	0.161332	undirected	PRADC1	RPN1
XM_005682526.3	XM_018067224.1	0.155404	undirected	MYDGF	RPN1
XM_018060484.1	XM_018067224.1	0.15411	undirected	RER1	RPN1
MSTRG.16372.1	XM_018063561.1	0.152448	undirected	MSTRG.16372	LPO
XM_005677361.3	XM_018067224.1	0.151054	undirected	LAMTOR2	RPN1
XM_018045076.1	XM_018067224.1	0.149696	undirected	SLC35A2	RPN1
MSTRG.16372.1	XM_018049889.1	0.149039	undirected	MSTRG.16372	ATP5I
XM_018049889.1	XM_018062502.1	0.148862	undirected	ATP5I	RABAC1
XM_018067224.1	XR_001295704.2	0.148704	undirected	RPN1	LOC106502117
XM_005686372.3	XM_005691552.3	0.148629	undirected	PRADC1	ERP29
XM_018044779.1	XM_018067224.1	0.147974	undirected	BCAP31	RPN1
XM_018052236.1	XM_018067224.1	0.147888	undirected	SEC61B	RPN1
MSTRG.16372.1	XM_018053620.1	0.147683	undirected	MSTRG.16372	SNAPC5
XM_005685282.3	XM_005691552.3	0.147484	undirected	DAD1	ERP29
XM_005682768.3	XM_018067224.1	0.147352	undirected	TMED9	RPN1
XM_005698968.3	XM_018067224.1	0.146869	undirected	ARV1	RPN1
MSTRG.16372.1	XM_018046615.1	0.146771	undirected	MSTRG.16372	CD36
XM_005696623.3	XM_018067224.1	0.146647	undirected	MRPS18B	RPN1
XM_005691552.3	XM_018047851.1	0.146543	undirected	ERP29	FKBP11
XM_005677361.3	XM_005691552.3	0.146055	undirected	LAMTOR2	ERP29
XM_005691552.3	XM_018060484.1	0.145818	undirected	ERP29	RER1
XM_005691552.3	XM_005693686.3	0.145644	undirected	ERP29	SLC35B1
XM_018038286.1	XM_018067224.1	0.14534	undirected	CMTM6	RPN1
XM_005682526.3	XM_005691552.3	0.145251	undirected	MYDGF	ERP29
XM_005689515.3	XM_018049889.1	0.145207	undirected	ATP5L	ATP5I
XM_005679432.3	XM_018067224.1	0.144947	undirected	SND1	RPN1
MSTRG.16372.1	XR_001295432.2	0.144627	undirected	MSTRG.16372	LOC106502597
MSTRG.2220.2	XM_005691552.3	0.14452	undirected	MSTRG.2220	ERP29
MSTRG.16372.1	XM_005697330.3	0.143833	undirected	MSTRG.16372	SNRNP25
XM_018048983.1	XM_018067224.1	0.143696	undirected	ADM2	RPN1
MSTRG.16372.1	XM_018040081.1	0.143659	undirected	MSTRG.16372	POLR3K
XM_005685282.3	XM_018067224.1	0.143193	undirected	DAD1	RPN1
XM_018043314.1	XM_018067224.1	0.143086	undirected	LOC102188021	RPN1
XM_013973847.2	XM_018067224.1	0.142648	undirected	LOC102170832	RPN1
XM_018049889.1	XR_001295432.2	0.142576	undirected	ATP5I	LOC106502597
MSTRG.13941.5	XM_018053620.1	0.142312	undirected	MSTRG.13941	SNAPC5
XM_005691552.3	XM_018067224.1	0.142203	undirected	ERP29	RPN1
XM_005709381.3	XM_018067224.1	0.142081	undirected	SEPW1	RPN1
XM_018050998.1	XR_001295432.2	0.142044	undirected	NDUFA7	LOC106502597
XM_018067224.1	XR_001296605.2	0.1419	undirected	RPN1	LOC106502936
XM_018064366.1	XM_018067128.1	0.141839	undirected	ABR	SLC38A3
XM_018046457.1	XM_018067224.1	0.141729	undirected	MPC2	RPN1
XM_005691414.3	XM_018067224.1	0.141461	undirected	ORAI1	RPN1
XM_005691552.3	XM_018038214.1	0.141342	undirected	ERP29	SEC61A1
XM_005691552.3	XM_018039773.1	0.141342	undirected	ERP29	SEC11C
XM_005686621.3	XM_018067224.1	0.141281	undirected	CFAP36	RPN1
XM_005685043.3	XM_018067224.1	0.141279	undirected	CDO1	RPN1
XM_005691552.3	XR_001295704.2	0.141262	undirected	ERP29	LOC106502117
XM_005691552.3	XM_018054831.1	0.141206	undirected	ERP29	PROM2
MSTRG.16372.1	XM_005682266.3	0.140905	undirected	MSTRG.16372	STX10
MSTRG.16372.1	XM_018040937.1	0.140562	undirected	MSTRG.16372	CDR2
XM_018047851.1	XM_018060484.1	0.140333	undirected	FKBP11	RER1
XM_018054831.1	XM_018067224.1	0.140092	undirected	PROM2	RPN1
XM_018038204.1	XM_018067224.1	0.140021	undirected	OSBPL10	RPN1
XM_018066578.1	XM_018067224.1	0.13953	undirected	ZSCAN2	RPN1
XM_005691552.3	XM_005699918.3	0.139349	undirected	ERP29	YIF1A
XM_005691552.3	XM_018066578.1	0.139305	undirected	ERP29	ZSCAN2
XM_013975740.2	XM_018067224.1	0.139177	undirected	PANX1	RPN1
XM_005700819.2	XM_018067224.1	0.138802	undirected	NDUFB11	RPN1
MSTRG.2220.2	XM_018067224.1	0.138745	undirected	MSTRG.2220	RPN1
XM_005678997.3	XM_005691552.3	0.138633	undirected	AGR2	ERP29
MSTRG.13941.5	XM_018063561.1	0.138213	undirected	MSTRG.13941	LPO
XM_005694718.3	XM_018051882.1	0.1382	undirected	FST	ACO1
XM_005682526.3	XM_018060484.1	0.138174	undirected	MYDGF	RER1
XM_005686372.3	XM_018060484.1	0.138111	undirected	PRADC1	RER1
XM_005691552.3	XR_001296605.2	0.138045	undirected	ERP29	LOC106502936
XM_018058728.1	XM_018067128.1	0.137965	undirected	DGAT1	SLC38A3
XM_005691552.3	XM_018044779.1	0.137856	undirected	ERP29	BCAP31
XM_013971564.2	XM_018067224.1	0.137824	undirected	AP2S1	RPN1
XM_018039179.1	XM_018067224.1	0.137499	undirected	FBXO9	RPN1
XM_018064692.1	XM_018067224.1	0.13718	undirected	LOC102186431	RPN1
XM_013971575.2	XM_018067224.1	0.137127	undirected	PRRG2	RPN1
XM_018066537.1	XM_018067224.1	0.136917	undirected	TMED3	RPN1
XM_005684138.3	XM_005691552.3	0.136912	undirected	FBP1	ERP29
XM_018064350.1	XM_018067224.1	0.136857	undirected	TP53I13	RPN1
XM_018051882.1	XM_018064366.1	0.13683	undirected	ACO1	ABR
XM_018047851.1	XR_001296605.2	0.136697	undirected	FKBP11	LOC106502936
XM_005675338.3	XM_005691552.3	0.136689	undirected	SEC62	ERP29
XM_005691552.3	XM_018040956.1	0.136684	undirected	ERP29	CDIPT
XM_018040956.1	XM_018067224.1	0.136657	undirected	CDIPT	RPN1
MSTRG.10564.1	XM_018067128.1	0.136455	undirected	MSTRG.10564	SLC38A3
MSTRG.16372.1	XM_018062502.1	0.136413	undirected	MSTRG.16372	RABAC1
XM_005699918.3	XM_018040956.1	0.136406	undirected	YIF1A	CDIPT
MSTRG.12722.2	XM_005691552.3	0.136334	undirected	MSTRG.12722	ERP29
XM_005686372.3	XR_001296605.2	0.136306	undirected	PRADC1	LOC106502936
XM_005709644.3	XM_018067128.1	0.136295	undirected	MRPL17	SLC38A3
XM_005691552.3	XM_018043314.1	0.136261	undirected	ERP29	LOC102188021
MSTRG.16372.1	XM_018054687.1	0.13617	undirected	MSTRG.16372	PAEP
XM_018053729.1	XM_018067224.1	0.136153	undirected	CCDC112	RPN1
MSTRG.16372.1	MSTRG.4075.2	0.136115	undirected	MSTRG.16372	MSTRG.4075
XM_018056145.1	XM_018067224.1	0.136102	undirected	SURF4	RPN1
XM_005699918.3	XM_018064350.1	0.136029	undirected	YIF1A	TP53I13
XM_005675338.3	XM_018067224.1	0.136016	undirected	SEC62	RPN1
MSTRG.16372.1	XM_018063936.1	0.135944	undirected	MSTRG.16372	ARSG
MSTRG.1962.1	XM_018043214.1	0.135905	undirected	MSTRG.1962	SCYL1
XM_018046468.1	XM_018067224.1	0.135852	undirected	BDH1	RPN1
XM_018040420.1	XM_018067224.1	0.135824	undirected	GNPTG	RPN1
XM_005688679.3	XM_018067224.1	0.135736	undirected	LOC102177994	RPN1

## Sheet: pink
fromNode	toNode	weight	direction	fromAltName	toAltName
XM_005699169.2	XM_018045354.1	0.46434	undirected	ANAPC16	RPL10
MSTRG.9898.3	XM_005699169.2	0.462438	undirected	MSTRG.9898	ANAPC16
MSTRG.11863.4	XM_018045354.1	0.46219	undirected	MSTRG.11863	RPL10
XM_018045354.1	XM_018066250.1	0.461779	undirected	RPL10	CIB1
MSTRG.4275.2	XM_018045354.1	0.461667	undirected	MSTRG.4275	RPL10
XM_018045354.1	XM_018046696.1	0.46117	undirected	RPL10	NUB1
MSTRG.9931.4	XM_018045354.1	0.460987	undirected	MSTRG.9931	RPL10
XM_005699169.2	XM_018042897.1	0.460691	undirected	ANAPC16	HYI
MSTRG.9898.3	XM_018066250.1	0.46058	undirected	MSTRG.9898	CIB1
NM_001285749.1	XM_005699169.2	0.460347	undirected	RPSA	ANAPC16
MSTRG.11863.4	MSTRG.9898.3	0.460107	undirected	MSTRG.11863	MSTRG.9898
XM_018042897.1	XM_018066250.1	0.459773	undirected	HYI	CIB1
MSTRG.4275.2	MSTRG.9898.3	0.459532	undirected	MSTRG.4275	MSTRG.9898
MSTRG.9898.3	XM_018046696.1	0.459408	undirected	MSTRG.9898	NUB1
MSTRG.9898.3	MSTRG.9931.4	0.459149	undirected	MSTRG.9898	MSTRG.9931
XM_018045354.1	XM_018060977.1	0.458778	undirected	RPL10	PES1
XM_018045354.1	XM_018062638.1	0.458654	undirected	RPL10	CCDC61
MSTRG.11863.4	NM_001285749.1	0.458474	undirected	MSTRG.11863	RPSA
MSTRG.9751.1	XM_005699169.2	0.458363	undirected	MSTRG.9751	ANAPC16
MSTRG.10179.12	XM_018045354.1	0.457936	undirected	MSTRG.10179	RPL10
MSTRG.11863.4	XM_018042897.1	0.457915	undirected	MSTRG.11863	HYI
XM_018042897.1	XM_018046696.1	0.457736	undirected	HYI	NUB1
MSTRG.4275.2	NM_001285749.1	0.457735	undirected	MSTRG.4275	RPSA
MSTRG.4275.2	XM_018042897.1	0.457602	undirected	MSTRG.4275	HYI
MSTRG.9898.3	XM_018060977.1	0.457511	undirected	MSTRG.9898	PES1
MSTRG.11863.4	MSTRG.9751.1	0.457341	undirected	MSTRG.11863	MSTRG.9751
MSTRG.4777.2	XM_018045354.1	0.457321	undirected	MSTRG.4777	RPL10
NM_001285749.1	XM_018046696.1	0.457225	undirected	RPSA	NUB1
MSTRG.9931.4	XM_018042897.1	0.457201	undirected	MSTRG.9931	HYI
MSTRG.9931.4	NM_001285749.1	0.457158	undirected	MSTRG.9931	RPSA
MSTRG.9898.3	XM_018062638.1	0.457127	undirected	MSTRG.9898	CCDC61
XM_018045354.1	XM_018062134.1	0.456696	undirected	RPL10	ELMO3
NM_001285749.1	XM_018066250.1	0.456672	undirected	RPSA	CIB1
MSTRG.17940.4	XM_018045354.1	0.456546	undirected	MSTRG.17940	RPL10
XM_018042897.1	XM_018060977.1	0.456463	undirected	HYI	PES1
MSTRG.9751.1	XM_018066250.1	0.456277	undirected	MSTRG.9751	CIB1
MSTRG.10179.12	MSTRG.9898.3	0.456121	undirected	MSTRG.10179	MSTRG.9898
XM_018045354.1	XM_018064225.1	0.45595	undirected	RPL10	NLE1
XM_018042897.1	XM_018062638.1	0.455844	undirected	HYI	CCDC61
MSTRG.4777.2	MSTRG.9898.3	0.455823	undirected	MSTRG.4777	MSTRG.9898
XM_005696321.3	XM_018066250.1	0.455792	undirected	MEA1	CIB1
XM_005699169.2	XM_018048891.1	0.455634	undirected	ANAPC16	PRR5
XM_005696321.3	XM_005699169.2	0.455572	undirected	MEA1	ANAPC16
MSTRG.4275.2	MSTRG.9751.1	0.4555	undirected	MSTRG.4275	MSTRG.9751
XM_018045354.1	XM_018062593.1	0.455485	undirected	RPL10	KLC3
MSTRG.9751.1	MSTRG.9931.4	0.45543	undirected	MSTRG.9751	MSTRG.9931
XM_018045354.1	XM_018048891.1	0.455285	undirected	RPL10	PRR5
MSTRG.17940.4	MSTRG.9898.3	0.455233	undirected	MSTRG.17940	MSTRG.9898
XM_005696321.3	XM_018045354.1	0.455077	undirected	MEA1	RPL10
MSTRG.9898.3	XM_018062134.1	0.45497	undirected	MSTRG.9898	ELMO3
MSTRG.9751.1	XM_018046696.1	0.454877	undirected	MSTRG.9751	NUB1
MSTRG.9751.1	XM_018045354.1	0.454851	undirected	MSTRG.9751	RPL10
NM_001285749.1	XM_018060977.1	0.454522	undirected	RPSA	PES1
MSTRG.10179.12	XM_018042897.1	0.454462	undirected	MSTRG.10179	HYI
MSTRG.17940.4	XM_018042897.1	0.454403	undirected	MSTRG.17940	HYI
XM_018045354.1	XM_018050384.1	0.454372	undirected	RPL10	JADE2
NM_001285749.1	XM_018062638.1	0.454368	undirected	RPSA	CCDC61
XM_018048891.1	XM_018066250.1	0.454366	undirected	PRR5	CIB1
MSTRG.9898.3	XM_018064225.1	0.454294	undirected	MSTRG.9898	NLE1
MSTRG.11863.4	XM_018048891.1	0.454288	undirected	MSTRG.11863	PRR5
XM_018040216.1	XM_018045354.1	0.454266	undirected	BUD31	RPL10
XM_018045354.1	XM_018052397.1	0.454246	undirected	RPL10	IL11RA
MSTRG.4777.2	XM_018042897.1	0.454154	undirected	MSTRG.4777	HYI
MSTRG.10179.12	NM_001285749.1	0.454054	undirected	MSTRG.10179	RPSA
MSTRG.4275.2	XM_018048891.1	0.453884	undirected	MSTRG.4275	PRR5
MSTRG.9898.3	XM_018062593.1	0.453756	undirected	MSTRG.9898	KLC3
XM_018042897.1	XM_018045354.1	0.4535	undirected	HYI	RPL10
MSTRG.4777.2	NM_001285749.1	0.453288	undirected	MSTRG.4777	RPSA
MSTRG.5322.3	XM_018045354.1	0.453225	undirected	MSTRG.5322	RPL10
NM_001285749.1	XM_018062134.1	0.453161	undirected	RPSA	ELMO3
MSTRG.9898.3	XM_018048891.1	0.453138	undirected	MSTRG.9898	PRR5
MSTRG.9898.3	XM_005696321.3	0.453115	undirected	MSTRG.9898	MEA1
XM_018042897.1	XM_018064225.1	0.453006	undirected	HYI	NLE1
XM_005696321.3	XM_018046696.1	0.452939	undirected	MEA1	NUB1
MSTRG.9751.1	MSTRG.9898.3	0.452749	undirected	MSTRG.9751	MSTRG.9898
XM_018042897.1	XM_018062134.1	0.452693	undirected	HYI	ELMO3
XM_005696321.3	XM_018060977.1	0.45268	undirected	MEA1	PES1
MSTRG.9898.3	XM_018052397.1	0.452645	undirected	MSTRG.9898	IL11RA
MSTRG.9751.1	XM_018060977.1	0.452521	undirected	MSTRG.9751	PES1
XM_018046696.1	XM_018048891.1	0.45251	undirected	NUB1	PRR5
MSTRG.9898.3	XM_018045354.1	0.452384	undirected	MSTRG.9898	RPL10
MSTRG.9931.4	XM_018048891.1	0.452375	undirected	MSTRG.9931	PRR5
MSTRG.9898.3	XM_018050384.1	0.452355	undirected	MSTRG.9898	JADE2
MSTRG.9931.4	XM_005696321.3	0.452348	undirected	MSTRG.9931	MEA1
MSTRG.9751.1	XM_018062638.1	0.452311	undirected	MSTRG.9751	CCDC61
XM_018042897.1	XM_018062593.1	0.452288	undirected	HYI	KLC3
MSTRG.9898.3	XM_018040216.1	0.452279	undirected	MSTRG.9898	BUD31
MSTRG.4777.2	MSTRG.9751.1	0.452246	undirected	MSTRG.4777	MSTRG.9751
MSTRG.11863.4	XM_005696321.3	0.452216	undirected	MSTRG.11863	MEA1
MSTRG.17940.4	MSTRG.9751.1	0.452045	undirected	MSTRG.17940	MSTRG.9751
MSTRG.9751.1	XM_018062134.1	0.45193	undirected	MSTRG.9751	ELMO3
NM_001285749.1	XM_018064225.1	0.451888	undirected	RPSA	NLE1
MSTRG.4275.2	XM_005696321.3	0.451833	undirected	MSTRG.4275	MEA1
XM_005696321.3	XM_018062638.1	0.451784	undirected	MEA1	CCDC61
NM_001285749.1	XM_018048891.1	0.451553	undirected	RPSA	PRR5
XM_018042897.1	XM_018052397.1	0.451551	undirected	HYI	IL11RA
XM_018045354.1	XM_018066033.1	0.451545	undirected	RPL10	EVL
MSTRG.17940.4	NM_001285749.1	0.451457	undirected	MSTRG.17940	RPSA
MSTRG.9898.3	XM_018042897.1	0.451443	undirected	MSTRG.9898	HYI
NM_001285749.1	XM_018062593.1	0.451351	undirected	RPSA	KLC3

## Sheet: red
fromNode	toNode	weight	direction	fromAltName	toAltName
XM_018038972.1	XM_018051624.1	0.43042	undirected	PI16	GFPT2
XM_013975635.2	XM_018038972.1	0.429902	undirected	ADAMTS4	PI16
NM_001314243.1	XM_013975635.2	0.426748	undirected	IGFBP6	ADAMTS4
NM_001314243.1	XM_018051624.1	0.426293	undirected	IGFBP6	GFPT2
XM_018038972.1	XM_018047420.1	0.425176	undirected	PI16	TFPI2
XM_018038971.1	XM_018051624.1	0.4236	undirected	PI16	GFPT2
XM_013975635.2	XM_018038971.1	0.42147	undirected	ADAMTS4	PI16
NM_001314243.1	XM_018047420.1	0.420603	undirected	IGFBP6	TFPI2
XM_013975635.2	XM_018059662.1	0.419295	undirected	ADAMTS4	TNS1
XM_005674830.2	XM_018051624.1	0.418918	undirected	COL8A1	GFPT2
MSTRG.2499.2	XM_013975635.2	0.418869	undirected	MSTRG.2499	ADAMTS4
XM_018038971.1	XM_018047420.1	0.418363	undirected	PI16	TFPI2
XM_018051624.1	XM_018059662.1	0.418211	undirected	GFPT2	TNS1
XM_005679147.3	XM_018051624.1	0.417528	undirected	SFRP4	GFPT2
XM_005679147.3	XM_013975635.2	0.417516	undirected	SFRP4	ADAMTS4
MSTRG.2499.2	XM_018051624.1	0.417463	undirected	MSTRG.2499	GFPT2
XM_005674830.2	XM_013975635.2	0.416736	undirected	COL8A1	ADAMTS4
MSTRG.13764.2	XM_018051624.1	0.416513	undirected	MSTRG.13764	GFPT2
XM_005689374.3	XM_018051624.1	0.416266	undirected	ANGPTL5	GFPT2
XM_005689374.3	XM_013975635.2	0.416192	undirected	ANGPTL5	ADAMTS4
MSTRG.15361.1	XM_018038972.1	0.416114	undirected	MSTRG.15361	PI16
MSTRG.13764.2	XM_013975635.2	0.415761	undirected	MSTRG.13764	ADAMTS4
MSTRG.2499.2	XM_018047420.1	0.414572	undirected	MSTRG.2499	TFPI2
XM_005679147.3	XM_018038972.1	0.414417	undirected	SFRP4	PI16
NM_001314243.1	XM_005679147.3	0.414245	undirected	IGFBP6	SFRP4
XM_005679147.3	XM_018047420.1	0.414233	undirected	SFRP4	TFPI2
XM_005689374.3	XM_018047420.1	0.413871	undirected	ANGPTL5	TFPI2
MSTRG.13764.2	XM_018047420.1	0.413521	undirected	MSTRG.13764	TFPI2
MSTRG.14286.5	XM_018051624.1	0.413266	undirected	MSTRG.14286	GFPT2
MSTRG.14286.5	XM_013975635.2	0.412287	undirected	MSTRG.14286	ADAMTS4
XM_018047420.1	XM_018059662.1	0.411789	undirected	TFPI2	TNS1
MSTRG.2951.1	XM_018038972.1	0.411763	undirected	MSTRG.2951	PI16
XM_005674830.2	XM_018047420.1	0.41158	undirected	COL8A1	TFPI2
MSTRG.6693.2	XM_018051624.1	0.411563	undirected	MSTRG.6693	GFPT2
MSTRG.15361.1	XM_018038971.1	0.411177	undirected	MSTRG.15361	PI16
MSTRG.5041.1	XM_018051624.1	0.410722	undirected	MSTRG.5041	GFPT2
MSTRG.14286.5	XM_018047420.1	0.410616	undirected	MSTRG.14286	TFPI2
MSTRG.5041.1	XM_013975635.2	0.410609	undirected	MSTRG.5041	ADAMTS4
MSTRG.6693.2	XM_013975635.2	0.410465	undirected	MSTRG.6693	ADAMTS4
MSTRG.15361.1	NM_001314243.1	0.410366	undirected	MSTRG.15361	IGFBP6
XM_018038972.1	XM_018056618.1	0.4103	undirected	PI16	MEDAG
MSTRG.2951.1	NM_001314243.1	0.410194	undirected	MSTRG.2951	IGFBP6
MSTRG.14286.5	NM_001314243.1	0.409822	undirected	MSTRG.14286	IGFBP6
MSTRG.5041.1	XM_018047420.1	0.409584	undirected	MSTRG.5041	TFPI2
NM_001314243.1	XM_018056618.1	0.40855	undirected	IGFBP6	MEDAG
MSTRG.14286.5	XM_018038972.1	0.408131	undirected	MSTRG.14286	PI16
MSTRG.13764.2	MSTRG.15361.1	0.407021	undirected	MSTRG.13764	MSTRG.15361
XM_005679147.3	XM_018059662.1	0.40698	undirected	SFRP4	TNS1
XM_018038972.1	XM_018052870.1	0.406779	undirected	PI16	COL12A1
XM_013963034.2	XM_018038972.1	0.406121	undirected	COL6A3	PI16
MSTRG.15361.1	XM_005689374.3	0.405935	undirected	MSTRG.15361	ANGPTL5
XM_005679147.3	XM_018038971.1	0.405609	undirected	SFRP4	PI16
XM_005687044.3	XM_018051624.1	0.405583	undirected	PTGS1	GFPT2
MSTRG.15361.1	XM_005679147.3	0.405546	undirected	MSTRG.15361	SFRP4
MSTRG.2951.1	XM_018059662.1	0.405338	undirected	MSTRG.2951	TNS1
MSTRG.16254.5	XM_013975635.2	0.405298	undirected	MSTRG.16254	ADAMTS4
MSTRG.16254.5	XM_018047420.1	0.405222	undirected	MSTRG.16254	TFPI2
XM_005674830.2	XM_005679147.3	0.404949	undirected	COL8A1	SFRP4
XM_005687044.3	XM_013975635.2	0.404617	undirected	PTGS1	ADAMTS4
MSTRG.8016.1	XM_018038972.1	0.40441	undirected	MSTRG.8016	PI16
NM_001314243.1	XM_018052870.1	0.404389	undirected	IGFBP6	COL12A1
MSTRG.14286.5	XM_005674830.2	0.404234	undirected	MSTRG.14286	COL8A1
NM_001314243.1	XM_013963034.2	0.404045	undirected	IGFBP6	COL6A3
MSTRG.15361.1	MSTRG.2499.2	0.403734	undirected	MSTRG.15361	MSTRG.2499
MSTRG.12147.9	XM_013975635.2	0.403719	undirected	MSTRG.12147	ADAMTS4
XM_005682716.3	XM_018038972.1	0.403464	undirected	LOX	PI16
MSTRG.2951.1	XM_018038971.1	0.403111	undirected	MSTRG.2951	PI16
XM_005676153.3	XM_018051624.1	0.40296	undirected	TNFAIP6	GFPT2
XM_005687044.3	XM_018047420.1	0.402557	undirected	PTGS1	TFPI2
MSTRG.8016.1	NM_001314243.1	0.40246	undirected	MSTRG.8016	IGFBP6
XM_005682716.3	XM_018038971.1	0.402453	undirected	LOX	PI16
MSTRG.15361.1	MSTRG.5041.1	0.402247	undirected	MSTRG.15361	MSTRG.5041
MSTRG.2499.2	MSTRG.2951.1	0.402016	undirected	MSTRG.2499	MSTRG.2951
MSTRG.2951.1	MSTRG.6693.2	0.401912	undirected	MSTRG.2951	MSTRG.6693
MSTRG.2499.2	XM_005679147.3	0.40141	undirected	MSTRG.2499	SFRP4
MSTRG.4724.1	XM_018038972.1	0.401377	undirected	MSTRG.4724	PI16
XM_005676153.3	XM_018047420.1	0.401307	undirected	TNFAIP6	TFPI2
MSTRG.14286.5	MSTRG.15361.1	0.401202	undirected	MSTRG.14286	MSTRG.15361
XM_005689131.3	XM_018038972.1	0.401196	undirected	NOV	PI16
XM_018038971.1	XM_018056618.1	0.401036	undirected	PI16	MEDAG
XM_005676153.3	XM_013975635.2	0.400918	undirected	TNFAIP6	ADAMTS4
MSTRG.6693.2	XM_005679147.3	0.40076	undirected	MSTRG.6693	SFRP4
MSTRG.14286.5	XM_018038971.1	0.400574	undirected	MSTRG.14286	PI16
MSTRG.16254.5	XM_018051624.1	0.400511	undirected	MSTRG.16254	GFPT2
MSTRG.12147.9	XM_018051624.1	0.399822	undirected	MSTRG.12147	GFPT2
XM_018051624.1	XM_018053487.1	0.399704	undirected	GFPT2	PHF10
MSTRG.2951.1	XM_005674830.2	0.399603	undirected	MSTRG.2951	COL8A1
MSTRG.2951.1	XM_005679147.3	0.399296	undirected	MSTRG.2951	SFRP4
XM_005679147.3	XM_005689374.3	0.399226	undirected	SFRP4	ANGPTL5
XM_018056618.1	XM_018059662.1	0.399065	undirected	MEDAG	TNS1
NM_001314243.1	XM_005689131.3	0.398951	undirected	IGFBP6	NOV
XM_018038971.1	XM_018052870.1	0.398857	undirected	PI16	COL12A1
MSTRG.15361.1	XM_018059662.1	0.398796	undirected	MSTRG.15361	TNS1
MSTRG.2499.2	XM_018056618.1	0.398598	undirected	MSTRG.2499	MEDAG
XM_013963034.2	XM_018038971.1	0.398198	undirected	COL6A3	PI16
MSTRG.14286.5	XM_018059662.1	0.398163	undirected	MSTRG.14286	TNS1
MSTRG.13764.2	XM_018056618.1	0.398158	undirected	MSTRG.13764	MEDAG
MSTRG.2499.2	XM_018052870.1	0.39797	undirected	MSTRG.2499	COL12A1
MSTRG.12147.9	XM_018047420.1	0.397672	undirected	MSTRG.12147	TFPI2
MSTRG.15361.1	XM_005674830.2	0.397562	undirected	MSTRG.15361	COL8A1

[truncated: 3 more sheets: tan, turquoise, yellow]
