# Supplementary material for: Transcriptome Analysis of Goat Mammary Gland Tissue Reveals the Adaptive Strategies and Molecular Mechanisms of Lactation and Involution
Source: Int J Mol Sci. 2022 Nov 20;23(22):14424. doi: 10.3390/ijms232214424 (PMC9693614; doi:10.3390/ijms232214424)
Supplement: Supplementary file 1 [file ijms-23-14424-s001.zip › Table S6.xlsx]

## Sheet: GO_blue
ONTOLOGY	ID	Description	GeneRatio	BgRatio	pvalue	p.adjust	qvalue	geneID	Count
BP	GO:0002181	cytoplasmic translation	13/154	146/18800	2.23068e-10	4.9878e-07	4.63981e-07	RPL24/RPL22L1/RPL5/RPS14/RPS3/DHX9/DRG1/RPS19/RPL19/RPL27/CNBP/RPL15/RBM4	13
BP	GO:1904851	positive regulation of establishment of protein localization to telomere	5/154	10/18800	8.42514e-09	5.31164e-06	4.94106e-06	CCT3/CCT2/TCP1/CCT4/CCT6A	5
BP	GO:0032212	positive regulation of telomere maintenance via telomerase	7/154	34/18800	9.64358e-09	5.31164e-06	4.94106e-06	CCT3/HNRNPA1/CCT2/TCP1/CCT4/MAPKAPK5/CCT6A	7
BP	GO:0070203	regulation of establishment of protein localization to telomere	5/154	11/18800	1.53441e-08	5.31164e-06	4.94106e-06	CCT3/CCT2/TCP1/CCT4/CCT6A	5
BP	GO:1904869	regulation of protein localization to Cajal body	5/154	11/18800	1.53441e-08	5.31164e-06	4.94106e-06	CCT3/CCT2/TCP1/CCT4/CCT6A	5
BP	GO:1904871	positive regulation of protein localization to Cajal body	5/154	11/18800	1.53441e-08	5.31164e-06	4.94106e-06	CCT3/CCT2/TCP1/CCT4/CCT6A	5
BP	GO:1904358	positive regulation of telomere maintenance via telomere lengthening	7/154	37/18800	1.80801e-08	5.31164e-06	4.94106e-06	CCT3/HNRNPA1/CCT2/TCP1/CCT4/MAPKAPK5/CCT6A	7
BP	GO:0070202	regulation of establishment of protein localization to chromosome	5/154	12/18800	2.61306e-08	5.31164e-06	4.94106e-06	CCT3/CCT2/TCP1/CCT4/CCT6A	5
BP	GO:1903405	protein localization to nuclear body	5/154	12/18800	2.61306e-08	5.31164e-06	4.94106e-06	CCT3/CCT2/TCP1/CCT4/CCT6A	5
BP	GO:1904816	positive regulation of protein localization to chromosome, telomeric region	5/154	12/18800	2.61306e-08	5.31164e-06	4.94106e-06	CCT3/CCT2/TCP1/CCT4/CCT6A	5
BP	GO:1904867	protein localization to Cajal body	5/154	12/18800	2.61306e-08	5.31164e-06	4.94106e-06	CCT3/CCT2/TCP1/CCT4/CCT6A	5
BP	GO:2001252	positive regulation of chromosome organization	9/154	89/18800	4.77488e-08	8.8972e-06	8.27647e-06	CCT3/HNRNPA1/CCT2/CDK2/SMC2/TCP1/CCT4/MAPKAPK5/CCT6A	9
BP	GO:1904814	regulation of protein localization to chromosome, telomeric region	5/154	14/18800	6.51834e-08	1.04107e-05	9.6844e-06	CCT3/CCT2/TCP1/CCT4/CCT6A	5
BP	GO:1990173	protein localization to nucleoplasm	5/154	14/18800	6.51834e-08	1.04107e-05	9.6844e-06	CCT3/CCT2/TCP1/CCT4/CCT6A	5
BP	GO:1904874	positive regulation of telomerase RNA localization to Cajal body	5/154	15/18800	9.71301e-08	1.44789e-05	1.34687e-05	CCT3/CCT2/TCP1/CCT4/CCT6A	5
BP	GO:2000573	positive regulation of DNA biosynthetic process	8/154	73/18800	1.44669e-07	2.02175e-05	1.8807e-05	CCT3/HNRNPA1/CCT2/TCP1/CCT4/PCNA/MAPKAPK5/CCT6A	8
BP	GO:0070200	establishment of protein localization to telomere	5/154	17/18800	1.97515e-07	2.5979e-05	2.41665e-05	CCT3/CCT2/TCP1/CCT4/CCT6A	5
BP	GO:0032206	positive regulation of telomere maintenance	7/154	52/18800	2.11997e-07	2.63347e-05	2.44974e-05	CCT3/HNRNPA1/CCT2/TCP1/CCT4/MAPKAPK5/CCT6A	7
BP	GO:0032210	regulation of telomere maintenance via telomerase	7/154	53/18800	2.4259e-07	2.8549e-05	2.65572e-05	CCT3/HNRNPA1/CCT2/TCP1/CCT4/MAPKAPK5/CCT6A	7
BP	GO:1904872	regulation of telomerase RNA localization to Cajal body	5/154	18/18800	2.71679e-07	3.03737e-05	2.82546e-05	CCT3/CCT2/TCP1/CCT4/CCT6A	5
BP	GO:0090670	RNA localization to Cajal body	5/154	19/18800	3.66276e-07	3.41247e-05	3.17439e-05	CCT3/CCT2/TCP1/CCT4/CCT6A	5
BP	GO:0090671	telomerase RNA localization to Cajal body	5/154	19/18800	3.66276e-07	3.41247e-05	3.17439e-05	CCT3/CCT2/TCP1/CCT4/CCT6A	5
BP	GO:0090672	telomerase RNA localization	5/154	19/18800	3.66276e-07	3.41247e-05	3.17439e-05	CCT3/CCT2/TCP1/CCT4/CCT6A	5
BP	GO:0090685	RNA localization to nucleus	5/154	19/18800	3.66276e-07	3.41247e-05	3.17439e-05	CCT3/CCT2/TCP1/CCT4/CCT6A	5
BP	GO:2000278	regulation of DNA biosynthetic process	9/154	119/18800	5.89825e-07	5.27539e-05	4.90734e-05	CCT3/HNRNPA1/CCT2/TCP1/CCT4/PARP4/PCNA/MAPKAPK5/CCT6A	9
BP	GO:1904356	regulation of telomere maintenance via telomere lengthening	7/154	61/18800	6.50013e-07	5.59011e-05	5.20011e-05	CCT3/HNRNPA1/CCT2/TCP1/CCT4/MAPKAPK5/CCT6A	7
BP	GO:0007004	telomere maintenance via telomerase	7/154	69/18800	1.52187e-06	0.000126033	0.00011724	CCT3/HNRNPA1/CCT2/TCP1/CCT4/MAPKAPK5/CCT6A	7
BP	GO:0051054	positive regulation of DNA metabolic process	12/154	263/18800	1.80274e-06	0.000143961	0.000133918	CCT3/HNRNPA1/CCT2/CDK2/TCP1/CCT4/ACTR2/PCNA/RPS3/DHX9/MAPKAPK5/CCT6A	12
BP	GO:0070199	establishment of protein localization to chromosome	5/154	26/18800	1.97832e-06	0.000152536	0.000141893	CCT3/CCT2/TCP1/CCT4/CCT6A	5
BP	GO:0006278	RNA-templated DNA biosynthetic process	7/154	75/18800	2.68721e-06	0.000200287	0.000186313	CCT3/HNRNPA1/CCT2/TCP1/CCT4/MAPKAPK5/CCT6A	7
BP	GO:0032204	regulation of telomere maintenance	7/154	80/18800	4.15637e-06	0.000290609	0.000270334	CCT3/HNRNPA1/CCT2/TCP1/CCT4/MAPKAPK5/CCT6A	7
BP	GO:0070198	protein localization to chromosome, telomeric region	5/154	30/18800	4.17408e-06	0.000290609	0.000270334	CCT3/CCT2/TCP1/CCT4/CCT6A	5
BP	GO:0022613	ribonucleoprotein complex biogenesis	15/154	448/18800	4.28895e-06	0.000290609	0.000270334	RPL24/NIFK/RPL5/GTPBP10/WDR36/RPS14/DHX9/NUDT21/RPS19/C1QBP/RPL27/DIMT1/TRAF7/CD2BP2/CLNS1A	15
BP	GO:0010833	telomere maintenance via telomere lengthening	7/154	81/18800	4.51856e-06	0.000297161	0.000276429	CCT3/HNRNPA1/CCT2/TCP1/CCT4/MAPKAPK5/CCT6A	7
BP	GO:0006403	RNA localization	10/154	196/18800	5.04079e-06	0.000322034	0.000299567	NDC1/CCT3/HNRNPA1/CCT2/POLDIP3/TCP1/LRPPRC/CCT4/DHX9/CCT6A	10
BP	GO:0033044	regulation of chromosome organization	10/154	212/18800	1.0061e-05	0.000624902	0.000581304	CCT3/HNRNPA1/CCT2/CDK2/MAD2L1/SMC2/TCP1/CCT4/MAPKAPK5/CCT6A	10
BP	GO:0042255	ribosome assembly	6/154	62/18800	1.15382e-05	0.000697281	0.000648633	RPL24/RPL5/RPS14/RPS19/C1QBP/TRAF7	6
BP	GO:0072594	establishment of protein localization to organelle	14/154	431/18800	1.27798e-05	0.000751991	0.000699526	TOMM70/KPNA6/CCT3/CCT2/TOMM22/UBE2D3/PEX7/TCP1/PEX13/CCT4/IPO7/HSPA8/SNF8/CCT6A	14
BP	GO:0000723	telomere maintenance	8/154	132/18800	1.31899e-05	0.00075622	0.00070346	CCT3/HNRNPA1/CCT2/TCP1/CCT4/PCNA/MAPKAPK5/CCT6A	8
BP	GO:0042176	regulation of protein catabolic process	13/154	395/18800	2.30143e-05	0.00127174	0.00118301	LRP2/RPL5/PSMC2/CDK2/MAD2L1/CSNK1A1/RACK1/ALAD/EEF1A1/SOCS4/ODC1/SNF8/HECTD1	13
BP	GO:0061077	chaperone-mediated protein folding	6/154	70/18800	2.3319e-05	0.00127174	0.00118301	CCT3/CCT2/TCP1/CCT4/HSPA8/CCT6A	6
BP	GO:0071897	DNA biosynthetic process	9/154	194/18800	3.21984e-05	0.00171418	0.00159459	CCT3/HNRNPA1/CCT2/TCP1/CCT4/PARP4/PCNA/MAPKAPK5/CCT6A	9
BP	GO:0051052	regulation of DNA metabolic process	14/154	472/18800	3.48552e-05	0.00181247	0.00168602	CCT3/HNRNPA1/CCT2/CDK2/TCP1/CCT4/ACTR2/PARP4/PCNA/RPS3/DHX9/MAPKAPK5/SUB1/CCT6A	14
BP	GO:0051972	regulation of telomerase activity	5/154	47/18800	4.01643e-05	0.00203042	0.00188876	CCT2/TCP1/CCT4/PARP4/MAPKAPK5	5
BP	GO:0022618	ribonucleoprotein complex assembly	9/154	200/18800	4.08626e-05	0.00203042	0.00188876	RPL24/RPL5/RPS14/DHX9/NUDT21/RPS19/TRAF7/CD2BP2/CLNS1A	9
BP	GO:0042254	ribosome biogenesis	11/154	304/18800	4.26926e-05	0.00207523	0.00193045	RPL24/NIFK/RPL5/GTPBP10/WDR36/RPS14/RPS19/C1QBP/RPL27/DIMT1/TRAF7	11
BP	GO:0071826	ribonucleoprotein complex subunit organization	9/154	208/18800	5.54185e-05	0.00263651	0.00245257	RPL24/RPL5/RPS14/DHX9/NUDT21/RPS19/TRAF7/CD2BP2/CLNS1A	9
BP	GO:0032200	telomere organization	8/154	162/18800	5.75104e-05	0.00267903	0.00249212	CCT3/HNRNPA1/CCT2/TCP1/CCT4/PCNA/MAPKAPK5/CCT6A	8
BP	GO:1900182	positive regulation of protein localization to nucleus	6/154	84/18800	6.57982e-05	0.00300255	0.00279307	CCT3/CCT2/TCP1/CCT4/ORMDL3/CCT6A	6
BP	GO:0006414	translational elongation	5/154	55/18800	8.64146e-05	0.00386446	0.00359485	USP16/EEF1B2/RACK1/EEF1A1/EEF2K	5
BP	GO:0006417	regulation of translation	13/154	463/18800	0.000116058	0.00499448	0.00464603	USP16/RPL5/POLDIP3/RPS14/RACK1/LRPPRC/RPS3/DHX9/MAPKAPK5/RPS6KB1/C1QBP/CNBP/RBM4	13
BP	GO:0034502	protein localization to chromosome	6/154	93/18800	0.000116151	0.00499448	0.00464603	CCT3/CCT2/TCP1/CCT4/BOD1/CCT6A	6
BP	GO:0045727	positive regulation of translation	7/154	141/18800	0.000163126	0.00686658	0.00638751	USP16/RPL5/POLDIP3/DHX9/RPS6KB1/C1QBP/CNBP	7
BP	GO:0051973	positive regulation of telomerase activity	4/154	34/18800	0.00016583	0.00686658	0.00638751	CCT2/TCP1/CCT4/MAPKAPK5	4
BP	GO:0050821	protein stabilization	8/154	191/18800	0.000180748	0.00734824	0.00683557	RPL5/CCT3/CCT2/TCP1/CCT4/NAA15/VHL/CCT6A	8
BP	GO:0006397	mRNA processing	13/154	500/18800	0.000246419	0.00983914	0.00915269	U2AF1/HNRNPA1/MAGOHB/RBM17/KIN/HSPA8/DHX9/NUDT21/C1QBP/CD2BP2/CPSF4/CLNS1A/RBM4	13
BP	GO:1903362	regulation of cellular protein catabolic process	9/154	258/18800	0.000282094	0.0109837	0.0102174	LRP2/RPL5/PSMC2/CDK2/CSNK1A1/RACK1/ALAD/SOCS4/HECTD1	9
BP	GO:1901998	toxin transport	4/154	39/18800	0.000284908	0.0109837	0.0102174	CCT3/CCT2/TCP1/CCT4	4
BP	GO:0000377	RNA splicing, via transesterification reactions with bulged adenosine as nucleophile	10/154	321/18800	0.000321481	0.0119805	0.0111447	U2AF1/HNRNPA1/MAGOHB/RBM17/HSPA8/DHX9/C1QBP/CD2BP2/CLNS1A/RBM4	10
BP	GO:0000398	mRNA splicing, via spliceosome	10/154	321/18800	0.000321481	0.0119805	0.0111447	U2AF1/HNRNPA1/MAGOHB/RBM17/HSPA8/DHX9/C1QBP/CD2BP2/CLNS1A/RBM4	10
BP	GO:0007339	binding of sperm to zona pellucida	4/154	41/18800	0.00034636	0.0126961	0.0118103	CCT3/CCT2/TCP1/CCT4	4
BP	GO:0000375	RNA splicing, via transesterification reactions	10/154	325/18800	0.00035452	0.0127856	0.0118936	U2AF1/HNRNPA1/MAGOHB/RBM17/HSPA8/DHX9/C1QBP/CD2BP2/CLNS1A/RBM4	10
BP	GO:0034250	positive regulation of cellular amide metabolic process	7/154	167/18800	0.00045779	0.0162479	0.0151143	USP16/RPL5/POLDIP3/DHX9/RPS6KB1/C1QBP/CNBP	7
BP	GO:1903050	regulation of proteolysis involved in cellular protein catabolic process	8/154	223/18800	0.000512024	0.0178889	0.0166408	RPL5/PSMC2/CDK2/CSNK1A1/RACK1/ALAD/SOCS4/HECTD1	8
BP	GO:0010638	positive regulation of organelle organization	12/154	487/18800	0.000687881	0.0233353	0.0217072	CCT3/HNRNPA1/CCT2/CDK2/SMC2/PHIP/TCP1/CCT4/RPS3/DRG1/MAPKAPK5/CCT6A	12
BP	GO:0035036	sperm-egg recognition	4/154	49/18800	0.000688788	0.0233353	0.0217072	CCT3/CCT2/TCP1/CCT4	4
BP	GO:0034470	ncRNA processing	11/154	424/18800	0.000756932	0.0252612	0.0234988	NIFK/KTI12/RPL5/WDR36/THG1L/RPS14/INTS7/RPS19/RPL27/DIMT1/SMAD2	11
BP	GO:1900180	regulation of protein localization to nucleus	6/154	132/18800	0.000768379	0.0252661	0.0235034	CCT3/CCT2/TCP1/CCT4/ORMDL3/CCT6A	6
BP	GO:0031647	regulation of protein stability	9/154	300/18800	0.000836912	0.0271208	0.0252287	RPL5/CCT3/CCT2/TCP1/CCT4/HSPA8/NAA15/VHL/CCT6A	9
BP	GO:0061136	regulation of proteasomal protein catabolic process	7/154	190/18800	0.000981747	0.0313598	0.0291719	PSMC2/CDK2/CSNK1A1/RACK1/ALAD/SOCS4/HECTD1	7
BP	GO:0050684	regulation of mRNA processing	6/154	139/18800	0.00100572	0.0316731	0.0294634	HNRNPA1/HSPA8/DHX9/NUDT21/C1QBP/RBM4	6
BP	GO:1904951	positive regulation of establishment of protein localization	9/154	309/18800	0.00102996	0.0319861	0.0297545	TOMM70/CCT3/CCT2/UBE2D3/RACK1/TCP1/CCT4/PSMD9/CCT6A	9
BP	GO:0140694	non-membrane-bounded organelle assembly	10/154	379/18800	0.00115686	0.0354349	0.0329627	RPL24/RPL5/CDK2/RPS14/TMOD3/RPS3/DRG1/RPS19/C1QBP/TRAF7	10
BP	GO:0000027	ribosomal large subunit assembly	3/154	27/18800	0.00136476	0.0412378	0.0383608	RPL24/RPL5/TRAF7	3
CC	GO:0005840	ribosome	14/154	229/19594	3.69864e-09	1.07261e-06	8.8378e-07	RPL24/RPL22L1/RPL5/MRPL32/RPS14/RACK1/RPS3/DHX9/RPS19/RPL19/RPL27/MRPS30/RPL15/MRPL49	14
CC	GO:0005832	chaperonin-containing T-complex	5/154	11/19594	1.24971e-08	1.64537e-06	1.35572e-06	CCT3/CCT2/TCP1/CCT4/CCT6A	5
CC	GO:0044391	ribosomal subunit	12/154	178/19594	1.70211e-08	1.64537e-06	1.35572e-06	RPL24/RPL5/MRPL32/RPS14/RACK1/RPS3/RPS19/RPL19/RPL27/MRPS30/RPL15/MRPL49	12
CC	GO:0101031	chaperone complex	6/154	34/19594	2.3971e-07	1.7379e-05	1.43195e-05	CCT3/CCT2/TCP1/CCT4/HSPA8/CCT6A	6
CC	GO:0022626	cytosolic ribosome	8/154	102/19594	1.42453e-06	8.26226e-05	6.80774e-05	RPL24/RPL5/RPS14/RPS3/RPS19/RPL19/RPL27/RPL15	8
CC	GO:0015934	large ribosomal subunit	8/154	112/19594	2.89091e-06	0.000139727	0.000115129	RPL24/RPL5/MRPL32/RPL19/RPL27/MRPS30/RPL15/MRPL49	8
CC	GO:0000793	condensed chromosome	10/154	255/19594	3.4759e-05	0.00144001	0.00118651	NIFK/CDK2/MAD2L1/CSNK1A1/SMC2/LRPPRC/BIRC5/BOD1/NSMCE3/SKA1	10
CC	GO:0022625	cytosolic large ribosomal subunit	5/154	58/19594	9.20406e-05	0.00333647	0.00274911	RPL24/RPL5/RPL19/RPL27/RPL15	5
CC	GO:0005844	polysome	5/154	65/19594	0.000158751	0.00499676	0.00411711	RPL24/RPS3/DHX9/DRG1/RPL19	5
CC	GO:0005874	microtubule	12/154	435/19594	0.000172302	0.00499676	0.00411711	CCT3/CCT2/KATNA1/TCP1/LRPPRC/CALM2/CCT4/PARP4/BIRC5/BOD1/SKA1/CCT6A	12
CC	GO:1904813	ficolin-1-rich granule lumen	6/154	124/19594	0.000445387	0.011742	0.00967492	ILF2/PSMC2/ALAD/EEF1A1/ACTR2/HSPA8	6
CC	GO:0005876	spindle microtubule	5/154	83/19594	0.000498254	0.0120411	0.00992138	CALM2/PARP4/BIRC5/BOD1/SKA1	5
CC	GO:0061695	transferase complex, transferring phosphorus-containing groups	8/154	259/19594	0.00103889	0.0229953	0.0189471	ACVR2A/CDK2/SOCS4/CALM2/PCNA/PHKB/POLR1C/POLR3E	8
CC	GO:1902554	serine/threonine protein kinase complex	5/154	99/19594	0.00111012	0.0229953	0.0189471	ACVR2A/CDK2/CALM2/PCNA/PHKB	5
CC	GO:0005819	spindle	10/154	402/19594	0.001322	0.0255588	0.0210593	MAD2L1/CSNK1A1/KATNA1/CALM2/PARP4/RPS3/DCUN1D5/BIRC5/BOD1/SKA1	10
CC	GO:0005925	focal adhesion	10/154	419/19594	0.00179508	0.0304547	0.0250933	RPL5/TWF1/RPS14/ACTR2/RPS3/HSPA8/RPS19/RPL19/RPL27/PDLIM1	10
CC	GO:0042788	polysomal ribosome	3/154	31/19594	0.00182104	0.0304547	0.0250933	RPL24/DHX9/RPL19	3
CC	GO:0030055	cell-substrate junction	10/154	428/19594	0.0020962	0.0304547	0.0250933	RPL5/TWF1/RPS14/ACTR2/RPS3/HSPA8/RPS19/RPL19/RPL27/PDLIM1	10
CC	GO:0015935	small ribosomal subunit	4/154	69/19594	0.00213416	0.0304547	0.0250933	RPS14/RACK1/RPS3/RPS19	4
CC	GO:1902911	protein kinase complex	5/154	115/19594	0.00215509	0.0304547	0.0250933	ACVR2A/CDK2/CALM2/PCNA/PHKB	5
CC	GO:0000228	nuclear chromosome	7/154	228/19594	0.00220534	0.0304547	0.0250933	NIFK/ORC4/SMC2/LRPPRC/PCNA/DHX9/BIRC5	7
CC	GO:0002178	palmitoyltransferase complex	2/154	11/19594	0.00322205	0.0424724	0.0349954	SPTLC1/ORMDL3	2
CC	GO:0101002	ficolin-1-rich granule	6/154	185/19594	0.00346414	0.0436783	0.0359891	ILF2/PSMC2/ALAD/EEF1A1/ACTR2/HSPA8	6
CC	GO:0000940	outer kinetochore	2/154	12/19594	0.00384657	0.0464794	0.038297	BOD1/SKA1	2
MF	GO:0003735	structural constituent of ribosome	12/157	181/18410	4.9934e-08	1.9674e-05	1.75558e-05	RPL24/RPL22L1/RPL5/MRPL32/RPS14/RPS3/RPS19/RPL19/RPL27/MRPS30/RPL15/MRPL49	12
MF	GO:0044183	protein folding chaperone	6/157	43/18410	1.64182e-06	0.000323438	0.000288614	CCT3/CCT2/TCP1/CCT4/HSPA8/CCT6A	6
MF	GO:0016887	ATP hydrolysis activity	10/157	325/18410	0.000486083	0.0472492	0.042162	CCT3/PSMC2/CCT2/SMC2/KATNA1/TCP1/CCT4/HSPA8/DHX9/CCT6A	10
MF	GO:0003697	single-stranded DNA binding	6/157	120/18410	0.00057386	0.0472492	0.042162	HNRNPA1/SMC2/LRPPRC/DHX9/SUB1/CNBP	6
MF	GO:0051082	unfolded protein binding	6/157	121/18410	0.00059961	0.0472492	0.042162	CCT3/CCT2/TCP1/CCT4/HSPA8/CCT6A	6

## Sheet: GO_brown
ONTOLOGY	ID	Description	GeneRatio	BgRatio	pvalue	p.adjust	qvalue	geneID	Count
BP	GO:0050921	positive regulation of chemotaxis	12/206	140/18800	4.64342e-08	0.000157598	0.000126399	CSF1/S100A14/RAC2/CD74/SMAD3/SPI1/TGFB1/CX3CR1/GPSM3/TREM2/FGFR1/GAS6	12
BP	GO:1902105	regulation of leukocyte differentiation	16/206	283/18800	9.72135e-08	0.000164971	0.000132313	C1QC/CSF1/NFAM1/CD74/JAK3/VNN1/ZFP36L2/MAFB/KLF10/MYC/TGFB1/FES/TREM2/SMAD7/GAS6/TLR9	16
BP	GO:0050920	regulation of chemotaxis	14/206	225/18800	1.96855e-07	0.000222709	0.00017862	PADI2/CSF1/S100A14/RAC2/CD74/SMAD3/SPI1/TGFB1/RIN3/CX3CR1/GPSM3/TREM2/FGFR1/GAS6	14
BP	GO:1903706	regulation of hemopoiesis	17/206	371/18800	7.54809e-07	0.000640455	0.000513667	C1QC/CSF1/NFAM1/CD74/JAK3/VNN1/ZFP36L2/MAFB/KLF10/MYC/SPI1/TGFB1/FES/TREM2/SMAD7/GAS6/TLR9	17
BP	GO:0002688	regulation of leukocyte chemotaxis	10/206	124/18800	1.10576e-06	0.000750592	0.000602001	PADI2/CSF1/S100A14/RAC2/CD74/SPI1/RIN3/CX3CR1/GPSM3/GAS6	10
BP	GO:1903131	mononuclear cell differentiation	18/206	433/18800	1.43467e-06	0.000811546	0.000650888	CSF1/NFAM1/CD74/JAK3/VNN1/ZFP36L2/MAFB/MYC/SPI1/BCL3/TP53/FES/TREM2/SMAD7/LFNG/HHEX/GAS6/TLR9	18
BP	GO:0002366	leukocyte activation involved in immune response	14/206	285/18800	3.31164e-06	0.00135655	0.001088	RAC2/CD74/SBNO2/JAK3/SPI1/TGFB1/BCL3/TP53/FES/CX3CR1/TREM2/SMAD7/LAT2/LFNG	14
BP	GO:0002573	myeloid leukocyte differentiation	12/206	210/18800	3.63937e-06	0.00135655	0.001088	C1QC/CSF1/CD74/SBNO2/JUNB/MAFB/KLF10/MYC/SPI1/TGFB1/FES/TREM2	12
BP	GO:0002263	cell activation involved in immune response	14/206	289/18800	3.89155e-06	0.00135655	0.001088	RAC2/CD74/SBNO2/JAK3/SPI1/TGFB1/BCL3/TP53/FES/CX3CR1/TREM2/SMAD7/LAT2/LFNG	14
BP	GO:0098883	synapse pruning	4/206	11/18800	4.35054e-06	0.00135655	0.001088	C1QC/C1QB/CX3CR1/TREM2	4
BP	GO:0071560	cellular response to transforming growth factor beta stimulus	13/206	252/18800	4.39658e-06	0.00135655	0.001088	ACVR1/ZYX/HTRA3/SMAD3/ZFP36L2/SPI1/TGFB1/TP53/FURIN/CX3CR1/SMAD7/VASN/ZNF703	13
BP	GO:0071559	response to transforming growth factor beta	13/206	258/18800	5.67901e-06	0.00148447	0.0011906	ACVR1/ZYX/HTRA3/SMAD3/ZFP36L2/SPI1/TGFB1/TP53/FURIN/CX3CR1/SMAD7/VASN/ZNF703	13
BP	GO:0002761	regulation of myeloid leukocyte differentiation	9/206	117/18800	5.68596e-06	0.00148447	0.0011906	C1QC/CSF1/CD74/MAFB/KLF10/MYC/TGFB1/FES/TREM2	9
BP	GO:0002690	positive regulation of leukocyte chemotaxis	8/206	94/18800	9.01177e-06	0.00218471	0.00175221	CSF1/S100A14/RAC2/CD74/SPI1/CX3CR1/GPSM3/GAS6	8
BP	GO:0002443	leukocyte mediated immunity	17/206	457/18800	1.22839e-05	0.00277943	0.0022292	C1QC/C1QB/RAC2/C1R/CFI/CD74/JAK3/SPI1/TGFB1/BCL3/FES/CX3CR1/TREM2/SMAD7/LAT2/CTSC/WAS	17
BP	GO:0007179	transforming growth factor beta receptor signaling pathway	11/206	200/18800	1.33629e-05	0.0028346	0.00227345	ACVR1/ZYX/HTRA3/SMAD3/SPI1/TGFB1/TP53/FURIN/SMAD7/VASN/ZNF703	11
BP	GO:0002683	negative regulation of immune system process	16/206	425/18800	1.92776e-05	0.00384872	0.00308681	PADI2/C1QC/LAPTM5/CD74/JAK3/MAFB/MYC/SPI1/DGKZ/TGFB1/CD68/FURIN/RIN3/CX3CR1/TREM2/SMAD7	16
BP	GO:0002931	response to ischemia	6/206	53/18800	2.40564e-05	0.00440183	0.00353042	CSF1/PANX2/TP53/CX3CR1/TREM2/GJB2	6
BP	GO:0002687	positive regulation of leukocyte migration	9/206	141/18800	2.56912e-05	0.00440183	0.00353042	CSF1/S100A14/RAC2/CD74/SPI1/CX3CR1/GPSM3/TREM2/GAS6	9
BP	GO:0030183	B cell differentiation	9/206	142/18800	2.71729e-05	0.00440183	0.00353042	NFAM1/JAK3/ZFP36L2/SPI1/BCL3/TP53/LFNG/HHEX/TLR9	9
BP	GO:0030099	myeloid cell differentiation	15/206	391/18800	2.84178e-05	0.00440183	0.00353042	C1QC/CSF1/CD74/SBNO2/DNASE2/JUNB/JAK3/MAFB/KLF10/MYC/SPI1/TGFB1/FES/TREM2/ZNF385A	15
BP	GO:0002685	regulation of leukocyte migration	11/206	218/18800	2.97508e-05	0.00440183	0.00353042	PADI2/CSF1/S100A14/RAC2/CD74/SPI1/RIN3/CX3CR1/GPSM3/TREM2/GAS6	11
BP	GO:0002763	positive regulation of myeloid leukocyte differentiation	6/206	55/18800	2.98297e-05	0.00440183	0.00353042	CSF1/CD74/KLF10/TGFB1/FES/TREM2	6
BP	GO:2000146	negative regulation of cell motility	14/206	361/18800	4.69115e-05	0.00663407	0.00532075	PADI2/TACSTD2/SRGAP1/CARD10/ARHGDIB/CD74/S1PR2/TGFB1/CYGB/NR2F2/RIN3/CX3CR1/SMAD7/WAS	14
BP	GO:0002274	myeloid leukocyte activation	11/206	232/18800	5.24714e-05	0.0067026	0.00537572	CSF1/RAC2/CD74/SBNO2/SPI1/FES/CRTC3/CX3CR1/TREM2/LAT2/CTSC	11
BP	GO:0007178	transmembrane receptor protein serine/threonine kinase signaling pathway	14/206	368/18800	5.76886e-05	0.0067026	0.00537572	INHBB/ACVR1/ZYX/HTRA3/GDF1/SMAD3/SPI1/TGFB1/TP53/RGMA/FURIN/SMAD7/VASN/ZNF703	14
BP	GO:0002577	regulation of antigen processing and presentation	4/206	20/18800	5.91143e-05	0.0067026	0.00537572	CD74/CD68/TREM2/WAS	4
BP	GO:0045655	regulation of monocyte differentiation	4/206	20/18800	5.91143e-05	0.0067026	0.00537572	CSF1/CD74/MYC/FES	4
BP	GO:0051271	negative regulation of cellular component movement	14/206	369/18800	5.93925e-05	0.0067026	0.00537572	PADI2/TACSTD2/SRGAP1/CARD10/ARHGDIB/CD74/S1PR2/TGFB1/CYGB/NR2F2/RIN3/CX3CR1/SMAD7/WAS	14
BP	GO:2001233	regulation of apoptotic signaling pathway	14/206	370/18800	6.11403e-05	0.0067026	0.00537572	INHBB/ACVR1/ARHGEF2/BCL2L14/CD74/VNN1/MYC/TP53/CX3CR1/GNAI2/TREM2/FGFR1/CTSC/ZNF385A	14
BP	GO:0030595	leukocyte chemotaxis	11/206	236/18800	6.122e-05	0.0067026	0.00537572	PADI2/CSF1/S100A14/RAC2/CD74/SPI1/CXCL16/RIN3/CX3CR1/GPSM3/GAS6	11
BP	GO:0150146	cell junction disassembly	4/206	21/18800	7.2399e-05	0.00752261	0.00603339	C1QC/C1QB/CX3CR1/TREM2	4
BP	GO:0002275	myeloid cell activation involved in immune response	7/206	93/18800	7.31426e-05	0.00752261	0.00603339	RAC2/SBNO2/SPI1/FES/CX3CR1/TREM2/LAT2	7
BP	GO:0030098	lymphocyte differentiation	14/206	382/18800	8.58943e-05	0.00857427	0.00687686	NFAM1/CD74/JAK3/VNN1/ZFP36L2/MAFB/SPI1/BCL3/TP53/SMAD7/LFNG/HHEX/GAS6/TLR9	14
BP	GO:0042113	B cell activation	13/206	336/18800	8.98014e-05	0.00870817	0.00698426	LAPTM5/NFAM1/CD74/JAK3/ZFP36L2/SPI1/TGFB1/BCL3/TP53/LAT2/LFNG/HHEX/TLR9	13
BP	GO:0045637	regulation of myeloid cell differentiation	10/206	208/18800	0.000102595	0.00967246	0.00775765	C1QC/CSF1/CD74/MAFB/KLF10/MYC/SPI1/TGFB1/FES/TREM2	10
BP	GO:0032103	positive regulation of response to external stimulus	15/206	442/18800	0.000113186	0.0103826	0.00832717	CSF1/S100A14/RAC2/CD74/SMAD3/ALOX5AP/SPI1/TGFB1/CX3CR1/GPSM3/TREM2/FGFR1/CTSC/GAS6/TLR9	15
BP	GO:0030336	negative regulation of cell migration	13/206	346/18800	0.000120335	0.0106563	0.00854675	PADI2/TACSTD2/SRGAP1/CARD10/ARHGDIB/CD74/S1PR2/TGFB1/CYGB/NR2F2/RIN3/CX3CR1/SMAD7	13
BP	GO:0040013	negative regulation of locomotion	14/206	396/18800	0.000125428	0.0106563	0.00854675	PADI2/TACSTD2/SRGAP1/CARD10/ARHGDIB/CD74/S1PR2/TGFB1/CYGB/NR2F2/RIN3/CX3CR1/SMAD7/WAS	14
BP	GO:0060485	mesenchyme development	12/206	301/18800	0.000126779	0.0106563	0.00854675	ACVR1/AKNA/SMAD3/MYC/DCHS1/TGFB1/MEOX1/SMAD7/VASN/FGFR1/ZNF703/MESP1	12
BP	GO:1902895	positive regulation of miRNA transcription	5/206	45/18800	0.00012873	0.0106563	0.00854675	SMAD3/MYC/SPI1/TGFB1/TP53	5
BP	GO:0035282	segmentation	7/206	103/18800	0.000139511	0.0106666	0.00855495	SMAD3/MAFB/TP53/MEOX1/LFNG/EGR2/MESP1	7
BP	GO:0007162	negative regulation of cell adhesion	12/206	305/18800	0.000143415	0.0106666	0.00855495	LAPTM5/TACSTD2/ARHGDIB/CD74/JAK3/ACER2/AKNA/SPI1/FXYD5/TGFB1/SMAD7/ZNF703	12
BP	GO:0002697	regulation of immune effector process	13/206	353/18800	0.000146707	0.0106666	0.00855495	LAPTM5/RAC2/CD74/JAK3/SPI1/TGFB1/FES/CX3CR1/TREM2/SMAD7/HK1/WAS/TLR9	13
BP	GO:0010944	negative regulation of transcription by competitive promoter binding	3/206	10/18800	0.000147008	0.0106666	0.00855495	BHLHE41/SMAD7/HHEX	3
BP	GO:0045657	positive regulation of monocyte differentiation	3/206	10/18800	0.000147008	0.0106666	0.00855495	CSF1/CD74/FES	3
BP	GO:0002237	response to molecule of bacterial origin	13/206	354/18800	0.000150853	0.0106666	0.00855495	S100A14/HNRNPA0/SBNO2/SIRPA/SPI1/TGFB1/PLSCR3/CD68/CNP/CX3CR1/TREM2/GJB2/TLR9	13
BP	GO:0003002	regionalization	13/206	354/18800	0.000150853	0.0106666	0.00855495	ACVR1/BHLHE41/SMAD3/MAFB/TP53/MEOX1/NR2F2/BHLHE40/LFNG/HHEX/EGR2/WNT7B/MESP1	13
BP	GO:0038061	NIK/NF-kappaB signaling	8/206	141/18800	0.000165324	0.0114512	0.00918425	LAPTM5/CARD10/SPI1/BCL3/MAP3K14/TREM2/NFKB2/TLR9	8
BP	GO:0090092	regulation of transmembrane receptor protein serine/threonine kinase signaling pathway	11/206	267/18800	0.000182331	0.0123766	0.00992649	INHBB/ACVR1/HTRA3/GDF1/SMAD3/TGFB1/TP53/RGMA/SMAD7/VASN/ZNF703	11
BP	GO:0001818	negative regulation of cytokine production	13/206	363/18800	0.000192945	0.0126021	0.0101073	LAPTM5/INHBB/JAK3/SIRPA/CDH3/TGFB1/BCL3/FURIN/CX3CR1/TREM2/SMAD7/GAS6/TLR9	13
BP	GO:0060326	cell chemotaxis	12/206	315/18800	0.000193402	0.0126021	0.0101073	PADI2/CSF1/S100A14/RAC2/CD74/SPI1/CXCL16/RIN3/CX3CR1/GPSM3/FGFR1/GAS6	12
BP	GO:0002357	defense response to tumor cell	3/206	11/18800	0.000200505	0.0126021	0.0101073	LAPTM5/SPI1/ABI3	3
BP	GO:1903977	positive regulation of glial cell migration	3/206	11/18800	0.000200505	0.0126021	0.0101073	CSF1/CX3CR1/TREM2	3
BP	GO:0002460	adaptive immune response based on somatic recombination of immune receptors built from immunoglobulin superfamily domains	13/206	370/18800	0.000232316	0.014336	0.011498	C1QC/C1QB/C1R/CFI/CD74/JAK3/TGFB1/BCL3/TREM2/SMAD7/NFKB2/CTSC/WAS	13
BP	GO:0001819	positive regulation of cytokine production	15/206	475/18800	0.00024713	0.0149778	0.0120127	LAPTM5/ARHGEF2/NFAM1/PANX2/CD74/CD276/SMAD3/TGFB1/BCL3/FURIN/GPSM3/TREM2/HK1/FRMD8/TLR9	15
BP	GO:0048144	fibroblast proliferation	6/206	81/18800	0.00026376	0.0154601	0.0123996	CD74/MYC/MED25/TP53/GAS6/WNT7B	6
BP	GO:0008360	regulation of cell shape	8/206	151/18800	0.000264198	0.0154601	0.0123996	PLEKHO1/RAC2/RHOBTB2/RHOJ/FBLIM1/FES/FGD2/RHOD	8
BP	GO:0045444	fat cell differentiation	10/206	237/18800	0.000295791	0.0170155	0.013647	INHBB/STEAP4/SMAD3/ZFP36L2/MAFB/TGFB1/METRNL/ATAT1/EGR2/ZNF385A	10
BP	GO:0032496	response to lipopolysaccharide	12/206	333/18800	0.000321192	0.0181688	0.014572	S100A14/HNRNPA0/SBNO2/SIRPA/SPI1/TGFB1/PLSCR3/CD68/CNP/CX3CR1/TREM2/GJB2	12
BP	GO:0050900	leukocyte migration	13/206	384/18800	0.000332046	0.0184748	0.0148174	PADI2/CSF1/S100A14/RAC2/CD74/SIRPA/SPI1/CXCL16/RIN3/CX3CR1/GPSM3/TREM2/GAS6	13
BP	GO:1902107	positive regulation of leukocyte differentiation	8/206	157/18800	0.000343782	0.0185206	0.0148541	CSF1/CD74/VNN1/KLF10/TGFB1/FES/TREM2/GAS6	8
BP	GO:1903708	positive regulation of hemopoiesis	8/206	157/18800	0.000343782	0.0185206	0.0148541	CSF1/CD74/VNN1/KLF10/TGFB1/FES/TREM2/GAS6	8
BP	GO:0022408	negative regulation of cell-cell adhesion	9/206	199/18800	0.000357725	0.0189706	0.0152151	LAPTM5/CD74/JAK3/AKNA/SPI1/FXYD5/TGFB1/SMAD7/ZNF703	9
BP	GO:0031668	cellular response to extracellular stimulus	10/206	245/18800	0.000384757	0.0200902	0.0161131	INHBB/KCNB1/KLF10/UCP2/FOLR2/CD68/TP53/PPP1R9B/FES/GAS6	10
BP	GO:1902253	regulation of intrinsic apoptotic signaling pathway by p53 class mediator	4/206	32/18800	0.000395853	0.0200941	0.0161162	CD74/MYC/TP53/ZNF385A	4
BP	GO:0001961	positive regulation of cytokine-mediated signaling pathway	5/206	57/18800	0.000396672	0.0200941	0.0161162	LAPTM5/CSF1/CD74/TREM2/GAS6	5
BP	GO:0050727	regulation of inflammatory response	13/206	394/18800	0.000423873	0.0208628	0.0167327	ZYX/SBNO2/AKNA/SMAD3/PTGES/ALOX5AP/SIRPA/METRNL/FURIN/GPSM3/TREM2/CTSC/TLR9	13
BP	GO:0001837	epithelial to mesenchymal transition	8/206	162/18800	0.000424142	0.0208628	0.0167327	ACVR1/AKNA/SMAD3/TGFB1/SMAD7/VASN/FGFR1/ZNF703	8
BP	GO:0097581	lamellipodium organization	6/206	89/18800	0.000439302	0.0212999	0.0170832	PLEKHO1/RAC2/ABI3/RHOD/ARHGEF6/WAS	6
BP	GO:0007015	actin filament organization	14/206	450/18800	0.000461017	0.0219653	0.017617	TACSTD2/ARHGEF2/ZYX/RAC2/SH3BP1/MYO1F/RHOBTB2/SMAD3/COTL1/FHOD1/GAS7/PPP1R9B/RHOD/WAS	14
BP	GO:1902893	regulation of miRNA transcription	5/206	59/18800	0.000465971	0.0219653	0.017617	SMAD3/MYC/SPI1/TGFB1/TP53	5
BP	GO:0051090	regulation of DNA-binding transcription factor activity	14/206	452/18800	0.000481703	0.0223959	0.0179623	ARHGEF2/NFAM1/TRIM14/SMAD3/SPI1/BCL3/CRTC3/CX3CR1/BHLHE40/NFKBIE/SMAD7/GLIS2/GAS6/TLR9	14
BP	GO:0061614	miRNA transcription	5/206	60/18800	0.000503856	0.0231093	0.0185345	SMAD3/MYC/SPI1/TGFB1/TP53	5
BP	GO:0032956	regulation of actin cytoskeleton organization	12/206	352/18800	0.000527585	0.023875	0.0191486	TACSTD2/RAC2/ARHGDIB/SH3BP1/RHOBTB2/SMAD3/COTL1/FHOD1/ABI3/FES/RHOD/WAS	12
BP	GO:0032612	interleukin-1 production	7/206	129/18800	0.000554188	0.0244274	0.0195916	PANX2/SMAD3/SIRPA/CX3CR1/TREM2/HK1/GAS6	7
BP	GO:0032652	regulation of interleukin-1 production	7/206	129/18800	0.000554188	0.0244274	0.0195916	PANX2/SMAD3/SIRPA/CX3CR1/TREM2/HK1/GAS6	7
BP	GO:0017015	regulation of transforming growth factor beta receptor signaling pathway	7/206	130/18800	0.000580378	0.0248834	0.0199573	HTRA3/SMAD3/TGFB1/TP53/SMAD7/VASN/ZNF703	7
BP	GO:0031669	cellular response to nutrient levels	9/206	213/18800	0.000585734	0.0248834	0.0199573	INHBB/KCNB1/KLF10/UCP2/FOLR2/CD68/TP53/FES/GAS6	9
BP	GO:0060393	regulation of pathway-restricted SMAD protein phosphorylation	5/206	62/18800	0.000586527	0.0248834	0.0199573	INHBB/ACVR1/GDF1/TGFB1/SMAD7	5
BP	GO:0009952	anterior/posterior pattern specification	9/206	214/18800	0.000605758	0.0252564	0.0202565	BHLHE41/SMAD3/TP53/MEOX1/NR2F2/BHLHE40/LFNG/HHEX/MESP1	9
BP	GO:0007389	pattern specification process	14/206	463/18800	0.000610201	0.0252564	0.0202565	ACVR1/BHLHE41/SMAD3/MAFB/DCHS1/TP53/MEOX1/NR2F2/BHLHE40/LFNG/HHEX/EGR2/WNT7B/MESP1	14
BP	GO:0030224	monocyte differentiation	4/206	36/18800	0.000626632	0.0254077	0.0203779	CSF1/CD74/MYC/FES	4
BP	GO:0071496	cellular response to external stimulus	11/206	309/18800	0.000628829	0.0254077	0.0203779	INHBB/KCNB1/KLF10/UCP2/FOLR2/CD68/TP53/PPP1R9B/MAP3K14/FES/GAS6	11
BP	GO:0034349	glial cell apoptotic process	3/206	16/18800	0.000653521	0.0254919	0.0204454	TP53/TREM2/GAS6	3
BP	GO:1903975	regulation of glial cell migration	3/206	16/18800	0.000653521	0.0254919	0.0204454	CSF1/CX3CR1/TREM2	3
BP	GO:0030316	osteoclast differentiation	6/206	96/18800	0.000657873	0.0254919	0.0204454	CSF1/SBNO2/JUNB/MAFB/KLF10/TREM2	6
BP	GO:1903844	regulation of cellular response to transforming growth factor beta stimulus	7/206	133/18800	0.000664903	0.0254919	0.0204454	HTRA3/SMAD3/TGFB1/TP53/SMAD7/VASN/ZNF703	7
BP	GO:0030217	T cell differentiation	10/206	263/18800	0.000668467	0.0254919	0.0204454	CD74/JAK3/VNN1/ZFP36L2/MAFB/SPI1/BCL3/TP53/SMAD7/LFNG	10
BP	GO:0060760	positive regulation of response to cytokine stimulus	5/206	64/18800	0.000678976	0.025605	0.0205361	LAPTM5/CSF1/CD74/TREM2/GAS6	5
BP	GO:0001756	somitogenesis	5/206	65/18800	0.00072909	0.0270641	0.0217063	SMAD3/TP53/MEOX1/LFNG/MESP1	5
BP	GO:0002718	regulation of cytokine production involved in immune response	6/206	98/18800	0.000733617	0.0270641	0.0217063	LAPTM5/CD74/JAK3/TGFB1/SMAD7/HK1	6
BP	GO:0001503	ossification	13/206	420/18800	0.000768948	0.027262	0.0218651	ACVR1/CSF1/SBNO2/JUNB/NPR2/SMAD3/KLF10/DCHS1/TGFB1/CLIC1/SMAD7/EGR2/WNT7B	13
BP	GO:0045639	positive regulation of myeloid cell differentiation	6/206	99/18800	0.00077393	0.027262	0.0218651	CSF1/CD74/KLF10/TGFB1/FES/TREM2	6
BP	GO:0060389	pathway-restricted SMAD protein phosphorylation	5/206	66/18800	0.000781917	0.027262	0.0218651	INHBB/ACVR1/GDF1/TGFB1/SMAD7	5
BP	GO:0010934	macrophage cytokine production	3/206	17/18800	0.000787176	0.027262	0.0218651	LAPTM5/CD74/TGFB1	3
BP	GO:0010935	regulation of macrophage cytokine production	3/206	17/18800	0.000787176	0.027262	0.0218651	LAPTM5/CD74/TGFB1	3
BP	GO:0070206	protein trimerization	3/206	17/18800	0.000787176	0.027262	0.0218651	STEAP4/CD74/ALOX5AP	3
BP	GO:0002367	cytokine production involved in immune response	6/206	100/18800	0.000815934	0.0279725	0.0224349	LAPTM5/CD74/JAK3/TGFB1/SMAD7/HK1	6
BP	GO:0045619	regulation of lymphocyte differentiation	8/206	181/18800	0.000879871	0.0294741	0.0236393	NFAM1/CD74/JAK3/VNN1/ZFP36L2/SMAD7/GAS6/TLR9	8
BP	GO:0034341	response to interferon-gamma	7/206	140/18800	0.000900276	0.0294741	0.0236393	ZYX/CD74/SIRPA/MYC/CXCL16/TP53/WAS	7
BP	GO:0010717	regulation of epithelial to mesenchymal transition	6/206	102/18800	0.000905204	0.0294741	0.0236393	ACVR1/SMAD3/TGFB1/SMAD7/VASN/ZNF703	6
BP	GO:1902106	negative regulation of leukocyte differentiation	6/206	102/18800	0.000905204	0.0294741	0.0236393	C1QC/CD74/JAK3/MAFB/MYC/SMAD7	6
BP	GO:0032640	tumor necrosis factor production	8/206	182/18800	0.000911839	0.0294741	0.0236393	ARHGEF2/SIRPA/BCL3/CX3CR1/TREM2/FRMD8/GAS6/TLR9	8
BP	GO:0032680	regulation of tumor necrosis factor production	8/206	182/18800	0.000911839	0.0294741	0.0236393	ARHGEF2/SIRPA/BCL3/CX3CR1/TREM2/FRMD8/GAS6/TLR9	8
BP	GO:0002281	macrophage activation involved in immune response	3/206	18/18800	0.000937014	0.0298025	0.0239027	SBNO2/CX3CR1/TREM2	3
BP	GO:0002792	negative regulation of peptide secretion	4/206	40/18800	0.000939561	0.0298025	0.0239027	INHBB/CD74/KCNB1/UCP2	4
BP	GO:0097529	myeloid leukocyte migration	9/206	229/18800	0.000979777	0.0307904	0.024695	CSF1/S100A14/RAC2/CD74/SIRPA/SPI1/RIN3/CX3CR1/TREM2	9
BP	GO:0060562	epithelial tube morphogenesis	11/206	328/18800	0.00102372	0.0318762	0.0255658	ACVR1/TACSTD2/CSF1/SMAD3/CTSZ/MYC/DCHS1/ESRP2/TGFB1/RGMA/MESP1	11
BP	GO:0071706	tumor necrosis factor superfamily cytokine production	8/206	187/18800	0.00108595	0.0326461	0.0261833	ARHGEF2/SIRPA/BCL3/CX3CR1/TREM2/FRMD8/GAS6/TLR9	8
BP	GO:1903555	regulation of tumor necrosis factor superfamily cytokine production	8/206	187/18800	0.00108595	0.0326461	0.0261833	ARHGEF2/SIRPA/BCL3/CX3CR1/TREM2/FRMD8/GAS6/TLR9	8
BP	GO:0030032	lamellipodium assembly	5/206	71/18800	0.00108999	0.0326461	0.0261833	RAC2/ABI3/RHOD/ARHGEF6/WAS	5
BP	GO:0043652	engulfment of apoptotic cell	3/206	19/18800	0.00110376	0.0326461	0.0261833	RAC2/RHOBTB2/TREM2	3
BP	GO:0042116	macrophage activation	6/206	106/18800	0.00110616	0.0326461	0.0261833	CD74/SBNO2/CRTC3/CX3CR1/TREM2/CTSC	6
BP	GO:1903707	negative regulation of hemopoiesis	6/206	106/18800	0.00110616	0.0326461	0.0261833	C1QC/CD74/JAK3/MAFB/MYC/SMAD7	6
BP	GO:0030330	DNA damage response, signal transduction by p53 class mediator	5/206	72/18800	0.00116105	0.0339707	0.0272457	CD74/ACER2/BCL3/TP53/ZNF385A	5
BP	GO:0043433	negative regulation of DNA-binding transcription factor activity	8/206	190/18800	0.00120255	0.0347808	0.0278954	SPI1/BCL3/BHLHE40/NFKBIE/SMAD7/GLIS2/GAS6/TLR9	8
BP	GO:0002703	regulation of leukocyte mediated immunity	9/206	236/18800	0.00120923	0.0347808	0.0278954	RAC2/JAK3/SPI1/TGFB1/FES/CX3CR1/TREM2/SMAD7/WAS	9
BP	GO:0035019	somatic stem cell population maintenance	4/206	43/18800	0.0012367	0.034978	0.0280536	ZFP36L2/KLF10/MYC/SPI1	4
BP	GO:0042771	intrinsic apoptotic signaling pathway in response to DNA damage by p53 class mediator	4/206	43/18800	0.0012367	0.034978	0.0280536	CD74/BCL3/TP53/ZNF385A	4
BP	GO:0060284	regulation of cell development	14/206	500/18800	0.00127647	0.0358044	0.0287164	TACSTD2/CRABP2/BHLHE41/S1PR2/NPR2/MYC/TGFB1/TP53/CX3CR1/BHLHE40/TREM2/SMAD7/EGR2/L1CAM	14
BP	GO:0006007	glucose catabolic process	3/206	20/18800	0.00128811	0.0358348	0.0287407	TP53/FOXK1/HK1	3
BP	GO:0032970	regulation of actin filament-based process	12/206	393/18800	0.00136838	0.0377583	0.0302834	TACSTD2/RAC2/ARHGDIB/SH3BP1/RHOBTB2/SMAD3/COTL1/FHOD1/ABI3/FES/RHOD/WAS	12
BP	GO:0007252	I-kappaB phosphorylation	3/206	21/18800	0.00149073	0.0408027	0.0327252	SIRPA/CX3CR1/TLR9	3
BP	GO:0048754	branching morphogenesis of an epithelial tube	7/206	153/18800	0.00150786	0.0409415	0.0328365	ACVR1/TACSTD2/CSF1/CTSZ/MYC/DCHS1/ESRP2	7
BP	GO:0001678	cellular glucose homeostasis	7/206	154/18800	0.00156529	0.0421636	0.0338166	KCNB1/UCP2/SIDT2/TREM2/FOXK1/HK1/GAS6	7
BP	GO:0071674	mononuclear cell migration	8/206	199/18800	0.00161331	0.0427992	0.0343264	PADI2/CSF1/S100A14/SIRPA/SPI1/CXCL16/CX3CR1/GAS6	8
BP	GO:0022407	regulation of cell-cell adhesion	13/206	456/18800	0.00161411	0.0427992	0.0343264	LAPTM5/CD74/JAK3/AKNA/VNN1/CD276/SIRPA/SPI1/FXYD5/TGFB1/SMAD7/ZNF703/MDGA1	13
BP	GO:0033077	T cell differentiation in thymus	5/206	78/18800	0.00166167	0.0435621	0.0349383	CD74/VNN1/ZFP36L2/MAFB/TP53	5
BP	GO:0002699	positive regulation of immune effector process	9/206	248/18800	0.00170231	0.0435621	0.0349383	LAPTM5/RAC2/CD74/SPI1/TGFB1/FES/TREM2/HK1/TLR9	9
BP	GO:0044346	fibroblast apoptotic process	3/206	22/18800	0.00171225	0.0435621	0.0349383	MYC/TP53/GAS6	3
BP	GO:0002285	lymphocyte activation involved in immune response	8/206	201/18800	0.00171814	0.0435621	0.0349383	CD74/JAK3/SPI1/TGFB1/BCL3/TP53/SMAD7/LFNG	8
BP	GO:0032924	activin receptor signaling pathway	4/206	47/18800	0.00172753	0.0435621	0.0349383	INHBB/ACVR1/SMAD3/SMAD7	4
BP	GO:0022411	cellular component disassembly	13/206	460/18800	0.00174335	0.0435621	0.0349383	C1QC/C1QB/ARHGEF2/SH3BP1/DNASE2/MAP1S/MYC/TGFB1/TP53/PPP1R9B/FURIN/CX3CR1/TREM2	13
BP	GO:0071675	regulation of mononuclear cell migration	6/206	116/18800	0.00175835	0.0435621	0.0349383	PADI2/CSF1/S100A14/SPI1/CX3CR1/GAS6	6
BP	GO:0048145	regulation of fibroblast proliferation	5/206	79/18800	0.0017584	0.0435621	0.0349383	CD74/MYC/MED25/TP53/GAS6	5
BP	GO:0072332	intrinsic apoptotic signaling pathway by p53 class mediator	5/206	79/18800	0.0017584	0.0435621	0.0349383	CD74/MYC/BCL3/TP53/ZNF385A	5
BP	GO:0032609	interferon-gamma production	6/206	117/18800	0.0018368	0.0448497	0.035971	LAPTM5/CD276/SIRPA/BCL3/GAS6/TLR9	6
BP	GO:0032649	regulation of interferon-gamma production	6/206	117/18800	0.0018368	0.0448497	0.035971	LAPTM5/CD276/SIRPA/BCL3/GAS6/TLR9	6
BP	GO:0050708	regulation of protein secretion	9/206	252/18800	0.0018985	0.0460252	0.0369138	INHBB/KCNB1/UCP2/SIDT2/TGFB1/NLGN2/TREM2/RHBDF1/STX1A	9
BP	GO:0030278	regulation of ossification	6/206	118/18800	0.00191788	0.0461651	0.037026	ACVR1/CSF1/SMAD3/TGFB1/SMAD7/EGR2	6
BP	GO:0045216	cell-cell junction organization	8/206	205/18800	0.00194393	0.0464626	0.0372646	SMAD3/NPHP1/DCHS1/TGFB1/NLGN2/SMAD7/ZNF703/GJB2	8
BP	GO:0010862	positive regulation of pathway-restricted SMAD protein phosphorylation	4/206	49/18800	0.00201747	0.0475508	0.0381373	INHBB/ACVR1/GDF1/TGFB1	4
BP	GO:0030225	macrophage differentiation	4/206	49/18800	0.00201747	0.0475508	0.0381373	C1QC/CSF1/SPI1/TGFB1	4
BP	GO:0030509	BMP signaling pathway	7/206	162/18800	0.00208846	0.0488843	0.0392069	ACVR1/HTRA3/GDF1/SMAD3/TGFB1/RGMA/SMAD7	7
BP	GO:0071216	cellular response to biotic stimulus	9/206	256/18800	0.00211239	0.0491057	0.0393845	SBNO2/SIRPA/SPI1/TGFB1/PLSCR3/CD68/TP53/CX3CR1/TREM2	9
CC	GO:0005766	primary lysosome	10/214	155/19594	8.10085e-06	0.00130829	0.00113412	PADI2/NFAM1/GM2A/VNN1/RNASET2/ARL8A/FTL/CD68/CPPED1/CTSC	10
CC	GO:0042582	azurophil granule	10/214	155/19594	8.10085e-06	0.00130829	0.00113412	PADI2/NFAM1/GM2A/VNN1/RNASET2/ARL8A/FTL/CD68/CPPED1/CTSC	10
CC	GO:0005775	vacuolar lumen	9/214	174/19594	0.000128891	0.0138773	0.0120299	PADI2/SDC3/GM2A/CD74/RNASET2/TPP1/FTL/CPPED1/CTSC	9
CC	GO:0034774	secretory granule lumen	12/214	322/19594	0.000231247	0.0143287	0.0124212	PADI2/S100A11/GM2A/RNASET2/CTSZ/COTL1/TGFB1/FTL/CPPED1/MVP/CTSC/GAS6	12
CC	GO:0060205	cytoplasmic vesicle lumen	12/214	325/19594	0.000251696	0.0143287	0.0124212	PADI2/S100A11/GM2A/RNASET2/CTSZ/COTL1/TGFB1/FTL/CPPED1/MVP/CTSC/GAS6	12
CC	GO:0031983	vesicle lumen	12/214	327/19594	0.000266168	0.0143287	0.0124212	PADI2/S100A11/GM2A/RNASET2/CTSZ/COTL1/TGFB1/FTL/CPPED1/MVP/CTSC/GAS6	12
CC	GO:0030139	endocytic vesicle	12/214	342/19594	0.000399032	0.0169241	0.014671	ZYX/RAC2/CD74/TRIM14/RAB22A/AP2A1/RIN3/RAB38/EHD1/WAS/WNT7B/TLR9	12
CC	GO:0035578	azurophil granule lumen	6/214	91/19594	0.000487441	0.0169241	0.014671	PADI2/GM2A/RNASET2/FTL/CPPED1/CTSC	6
CC	GO:0005765	lysosomal membrane	13/214	404/19594	0.000523966	0.0169241	0.014671	LAPTM5/GLMP/NFAM1/CD74/ATP6V1B2/VNN1/SLC2A6/SIDT2/ARL8A/AP2A1/CD68/VASN/TLR9	13
CC	GO:0098852	lytic vacuole membrane	13/214	404/19594	0.000523966	0.0169241	0.014671	LAPTM5/GLMP/NFAM1/CD74/ATP6V1B2/VNN1/SLC2A6/SIDT2/ARL8A/AP2A1/CD68/VASN/TLR9	13
CC	GO:0005912	adherens junction	8/214	172/19594	0.000619419	0.0181884	0.015767	S100A11/ZYX/SH3BP1/NPHP1/DCHS1/CDH3/PPP1R9B/SMAD7	8
CC	GO:0031252	cell leading edge	13/214	416/19594	0.000687804	0.0185134	0.0160488	PLEKHO1/S100A11/ARHGEF2/RAC2/SH3BP1/ATP6V1B2/RAB22A/KCNB1/DGKZ/PPP1R9B/ABI3/FGD2/ARHGEF6	13
CC	GO:0045335	phagocytic vesicle	7/214	138/19594	0.000813664	0.0202164	0.0175251	ZYX/RAC2/TRIM14/RAB22A/RAB38/WAS/TLR9	7
CC	GO:0005911	cell-cell junction	14/214	497/19594	0.00117764	0.0263387	0.0228323	S100A11/ARHGEF2/ZYX/SH3BP1/PANX2/NPHP1/DCHS1/FHOD1/CDH3/PPP1R9B/SMAD7/WAS/GJB2/EVPL	14
CC	GO:0015629	actin cytoskeleton	14/214	499/19594	0.00122316	0.0263387	0.0228323	FHL3/ZYX/RAC2/MYO1F/RAB22A/FBLIM1/TNNI1/COTL1/FHOD1/GAS7/PPP1R9B/STX1A/LSP1/WAS	14
CC	GO:0005774	vacuolar membrane	13/214	449/19594	0.00137525	0.0277628	0.0240668	LAPTM5/GLMP/NFAM1/CD74/ATP6V1B2/VNN1/SLC2A6/SIDT2/ARL8A/AP2A1/CD68/VASN/TLR9	13
CC	GO:0042641	actomyosin	5/214	77/19594	0.00154866	0.0294246	0.0255074	FHL3/ZYX/FBLIM1/FHOD1/STX1A	5
MF	GO:0001217	DNA-binding transcription repressor activity	14/207	325/18410	1.9646e-05	0.00884069	0.00802383	SATB1/BHLHE41/SMAD3/MYC/SPI1/ERF/TP53/BHLHE40/FOXQ1/ZBTB12/FOXP4/FOXK1/HHEX/DLX4	14
MF	GO:0001227	DNA-binding transcription repressor activity, RNA polymerase II-specific	13/207	321/18410	7.33533e-05	0.0165045	0.0149795	SATB1/BHLHE41/MYC/SPI1/ERF/TP53/BHLHE40/FOXQ1/ZBTB12/FOXP4/FOXK1/HHEX/DLX4	13
MF	GO:0001228	DNA-binding transcription activator activity, RNA polymerase II-specific	15/207	462/18410	0.000241691	0.0276981	0.0251388	JUNB/SMAD3/MAFB/KLF10/MYC/SPI1/TP53/MEOX1/GLIS2/NFKB2/HHEX/EGR2/ELF4/ETV4/MESP1	15
MF	GO:0001216	DNA-binding transcription activator activity	15/207	466/18410	0.000264978	0.0276981	0.0251388	JUNB/SMAD3/MAFB/KLF10/MYC/SPI1/TP53/MEOX1/GLIS2/NFKB2/HHEX/EGR2/ELF4/ETV4/MESP1	15
MF	GO:0045296	cadherin binding	12/207	333/18410	0.000404397	0.0276981	0.0251388	ACVR1/S100A11/TAGLN2/MICALL1/DCHS1/EFHD2/CDH3/FXYD5/CLIC1/VASN/EHD1/EVPL	12
MF	GO:0030695	GTPase regulator activity	15/207	488/18410	0.000430859	0.0276981	0.0251388	ARHGEF2/SRGAP1/ARHGDIB/SH3BP1/GMIP/SIRPA/RIN3/GPSM3/FGD2/RASGEF1A/RAB3IL1/RHOD/ARHGEF6/WAS/RAP1GAP	15
MF	GO:0060589	nucleoside-triphosphatase regulator activity	15/207	488/18410	0.000430859	0.0276981	0.0251388	ARHGEF2/SRGAP1/ARHGDIB/SH3BP1/GMIP/SIRPA/RIN3/GPSM3/FGD2/RASGEF1A/RAB3IL1/RHOD/ARHGEF6/WAS/RAP1GAP	15

## Sheet: GO_cyan
ONTOLOGY	ID	Description	GeneRatio	BgRatio	pvalue	p.adjust	qvalue	geneID	Count
BP	GO:0010977	negative regulation of neuron projection development	7/122	136/18800	2.97855e-05	0.0347583	0.0318283	LRIG2/FKBP4/CARM1/MT3/SEMA7A/BAG5/SEMA3G	7
BP	GO:0031345	negative regulation of cell projection organization	8/122	188/18800	3.13986e-05	0.0347583	0.0318283	LRIG2/FKBP4/CARM1/MT3/ARPIN/SEMA7A/BAG5/SEMA3G	8
BP	GO:0043484	regulation of RNA splicing	7/122	154/18800	6.58038e-05	0.0485632	0.0444695	SRPK2/YTHDC1/RAVER1/CCNL2/HNRNPF/PQBP1/PUF60	7
BP	GO:0070997	neuron death	10/122	353/18800	0.000102692	0.049917	0.0457092	CDC42/ZNF746/SRPK2/IL27RA/MAX/CHMP4A/DNAJC5/MT3/BAG5/TFAP2A	10
BP	GO:0008380	RNA splicing	11/122	438/18800	0.000133565	0.049917	0.0457092	SRPK2/YTHDC1/RAVER1/LGALS3/HNRNPC/CWC15/CCNL2/SRRM2/HNRNPF/PQBP1/PUF60	11
BP	GO:0071360	cellular response to exogenous dsRNA	3/122	18/18800	0.000202613	0.049917	0.0457092	RALB/MAVS/PQBP1	3
BP	GO:2000785	regulation of autophagosome assembly	4/122	45/18800	0.00020474	0.049917	0.0457092	RALB/SH3GLB1/PIP4K2C/CHMP4A	4
BP	GO:0007033	vacuole organization	7/122	188/18800	0.000227527	0.049917	0.0457092	RALB/SH3GLB1/PIP4K2C/CHMP4A/MT3/ATG7/CLN8	7
BP	GO:2000786	positive regulation of autophagosome assembly	3/122	19/18800	0.000239466	0.049917	0.0457092	RALB/SH3GLB1/PIP4K2C	3
BP	GO:0000377	RNA splicing, via transesterification reactions with bulged adenosine as nucleophile	9/122	321/18800	0.000248417	0.049917	0.0457092	SRPK2/YTHDC1/RAVER1/HNRNPC/CWC15/SRRM2/HNRNPF/PQBP1/PUF60	9
BP	GO:0000398	mRNA splicing, via spliceosome	9/122	321/18800	0.000248417	0.049917	0.0457092	SRPK2/YTHDC1/RAVER1/HNRNPC/CWC15/SRRM2/HNRNPF/PQBP1/PUF60	9
BP	GO:0000375	RNA splicing, via transesterification reactions	9/122	325/18800	0.000272155	0.049917	0.0457092	SRPK2/YTHDC1/RAVER1/HNRNPC/CWC15/SRRM2/HNRNPF/PQBP1/PUF60	9
BP	GO:0044090	positive regulation of vacuole organization	3/122	21/18800	0.000325579	0.049917	0.0457092	RALB/SH3GLB1/PIP4K2C	3
BP	GO:0044088	regulation of vacuole organization	4/122	51/18800	0.000333255	0.049917	0.0457092	RALB/SH3GLB1/PIP4K2C/CHMP4A	4
BP	GO:0031330	negative regulation of cellular catabolic process	8/122	265/18800	0.000338191	0.049917	0.0457092	LRIG2/HNRNPC/CHMP4A/EIF4ENIF1/MT3/BAG5/ATG7/BAG6	8
CC	GO:0030667	secretory granule membrane	10/121	312/19594	2.41382e-05	0.00654145	0.00619971	TOM1/ADGRE5/LGALS3/LHFPL2/DNAJC5/PECAM1/LPCAT1/EXOC3/APLP2/ALDH3B1	10
CC	GO:0016607	nuclear speck	11/121	411/19594	4.89387e-05	0.00663119	0.00628475	SRPK2/YTHDC1/CSNK1A1/CWC15/CCNL2/EIF4ENIF1/MORF4L1/FAM107A/BRD2/SRRM2/PQBP1	11
CC	GO:0031092	platelet alpha granule membrane	3/121	17/19594	0.000146635	0.0132461	0.012554	LHFPL2/PECAM1/APLP2	3

## Sheet: GO_darkgreen
ONTOLOGY	ID	Description	GeneRatio	BgRatio	pvalue	p.adjust	qvalue	geneID	Count
BP	GO:0006695	cholesterol biosynthetic process	5/43	58/18800	2.06216e-07	0.000101458	8.38975e-05	DHCR24/HSD17B7/HMGCR/MSMO1/TM7SF2	5
BP	GO:1902653	secondary alcohol biosynthetic process	5/43	58/18800	2.06216e-07	0.000101458	8.38975e-05	DHCR24/HSD17B7/HMGCR/MSMO1/TM7SF2	5
BP	GO:0016126	sterol biosynthetic process	5/43	65/18800	3.67372e-07	0.000120498	9.96416e-05	DHCR24/HSD17B7/HMGCR/MSMO1/TM7SF2	5
BP	GO:0016125	sterol metabolic process	6/43	154/18800	1.30061e-06	0.000319951	0.000264572	DHCR24/HSD17B7/HMGCR/EBPL/MSMO1/TM7SF2	6
BP	GO:0006694	steroid biosynthetic process	6/43	175/18800	2.73538e-06	0.000538322	0.000445146	DHCR24/HSD17B7/HMGCR/HSD17B12/MSMO1/TM7SF2	6
BP	GO:0008202	steroid metabolic process	7/43	323/18800	7.84547e-06	0.00128666	0.00106396	DHCR24/HSD17B7/HMGCR/EBPL/HSD17B12/MSMO1/TM7SF2	7
BP	GO:0008203	cholesterol metabolic process	5/43	139/18800	1.57857e-05	0.00197965	0.001637	DHCR24/HSD17B7/HMGCR/MSMO1/TM7SF2	5
BP	GO:0006066	alcohol metabolic process	7/43	361/18800	1.614e-05	0.00197965	0.001637	DHCR24/HSD17B7/HMGCR/ACSS1/LRAT/MSMO1/TM7SF2	7
BP	GO:0046165	alcohol biosynthetic process	5/43	143/18800	1.81066e-05	0.00197965	0.001637	DHCR24/HSD17B7/HMGCR/MSMO1/TM7SF2	5
BP	GO:1902652	secondary alcohol metabolic process	5/43	149/18800	2.20772e-05	0.0021724	0.00179639	DHCR24/HSD17B7/HMGCR/MSMO1/TM7SF2	5
BP	GO:0034976	response to endoplasmic reticulum stress	6/43	257/18800	2.4559e-05	0.00219692	0.00181666	TMBIM6/ERLEC1/PPP1R15B/TMED2/CCDC47/P4HB	6
BP	GO:0034620	cellular response to unfolded protein	4/43	98/18800	7.33013e-05	0.00601071	0.00497035	TMBIM6/ERLEC1/PPP1R15B/TMED2	4
BP	GO:0035967	cellular response to topologically incorrect protein	4/43	117/18800	0.000145779	0.0103956	0.0085963	TMBIM6/ERLEC1/PPP1R15B/TMED2	4
BP	GO:0006984	ER-nucleus signaling pathway	3/43	45/18800	0.000147905	0.0103956	0.0085963	PPP1R15B/TMED2/CCDC47	3
BP	GO:0042445	hormone metabolic process	5/43	230/18800	0.000172912	0.011343	0.00937973	DPP4/HSD17B7/DDO/HSD17B12/LRAT	5
BP	GO:1901617	organic hydroxy compound biosynthetic process	5/43	243/18800	0.00022322	0.0131562	0.0108791	DHCR24/HSD17B7/HMGCR/MSMO1/TM7SF2	5
BP	GO:0010998	regulation of translational initiation by eIF2 alpha phosphorylation	2/43	10/18800	0.000227292	0.0131562	0.0108791	PPP1R15B/TMED2	2
BP	GO:0006703	estrogen biosynthetic process	2/43	11/18800	0.000277398	0.0138915	0.0114871	HSD17B7/HSD17B12	2
BP	GO:0036490	regulation of translation in response to endoplasmic reticulum stress	2/43	11/18800	0.000277398	0.0138915	0.0114871	PPP1R15B/TMED2	2
BP	GO:0006986	response to unfolded protein	4/43	139/18800	0.000282347	0.0138915	0.0114871	TMBIM6/ERLEC1/PPP1R15B/TMED2	4
BP	GO:0002638	negative regulation of immunoglobulin production	2/43	12/18800	0.000332394	0.0148671	0.0122938	TMBIM6/NDFIP1	2
BP	GO:0006983	ER overload response	2/43	12/18800	0.000332394	0.0148671	0.0122938	PPP1R15B/CCDC47	2
BP	GO:0043558	regulation of translational initiation in response to stress	2/43	14/18800	0.000456971	0.0195504	0.0161665	PPP1R15B/TMED2	2
BP	GO:0035966	response to topologically incorrect protein	4/43	160/18800	0.000481518	0.0197422	0.0163251	TMBIM6/ERLEC1/PPP1R15B/TMED2	4
BP	GO:0030968	endoplasmic reticulum unfolded protein response	3/43	76/18800	0.000697482	0.0274529	0.0227012	ERLEC1/PPP1R15B/TMED2	3
BP	GO:0036499	PERK-mediated unfolded protein response	2/43	18/18800	0.000763864	0.0289093	0.0239056	PPP1R15B/TMED2	2
BP	GO:0043555	regulation of translation in response to stress	2/43	20/18800	0.00094584	0.0344706	0.0285042	PPP1R15B/TMED2	2
BP	GO:1903828	negative regulation of protein localization	4/43	199/18800	0.00108838	0.0382487	0.0316284	NDFIP1/MRAP2/HMGCR/ERLEC1	4
BP	GO:0140467	integrated stress response signaling	2/43	22/18800	0.00114661	0.0389056	0.0321716	PPP1R15B/TMED2	2
BP	GO:1905954	positive regulation of lipid localization	3/43	94/18800	0.00129243	0.0423916	0.0350542	DBI/LPL/LRAT	3
BP	GO:0032469	endoplasmic reticulum calcium ion homeostasis	2/43	25/18800	0.00148264	0.0470617	0.038916	TMBIM6/CCDC47	2
CC	GO:0005791	rough endoplasmic reticulum	3/42	79/19594	0.000646616	0.045662	0.0364023	LRAT/CCDC47/SFTPD	3
CC	GO:0030663	COPI-coated vesicle membrane	2/42	18/19594	0.000671499	0.045662	0.0364023	TMED7/TMED2	2
CC	GO:0030137	COPI-coated vesicle	2/42	22/19594	0.00100834	0.0457113	0.0364416	TMED7/TMED2	2

## Sheet: GO_lightcyan
ONTOLOGY	ID	Description	GeneRatio	BgRatio	pvalue	p.adjust	qvalue	geneID	Count
MF	GO:0017134	fibroblast growth factor binding	3/85	23/18410	0.000157357	0.0396539	0.0369374	TGFBR3/S100A13/FGFR1	3
MF	GO:0019838	growth factor binding	5/85	139/18410	0.000461357	0.0410378	0.0382265	TGFBR3/S100A13/SHC1/IL1R1/FGFR1	5
MF	GO:0019199	transmembrane receptor protein kinase activity	4/85	79/18410	0.000488546	0.0410378	0.0382265	TGFBR3/MET/DDR1/FGFR1	4

## Sheet: GO_lightgreen
ONTOLOGY	ID	Description	GeneRatio	BgRatio	pvalue	p.adjust	qvalue	geneID	Count
BP	GO:1903131	mononuclear cell differentiation	21/85	433/18800	2.81474e-16	3.14856e-13	2.38426e-13	TRPM2/LCK/CD28/ITGA4/INPP5D/PTPN22/SLAMF8/NCKAP1L/ITK/VAV1/BATF/TNFSF13B/PREX1/CRTAM/CD3G/CD3D/PTPRC/TBX21/IKZF3/DOCK2/SASH3	21
BP	GO:0030098	lymphocyte differentiation	20/85	382/18800	3.689e-16	3.14856e-13	2.38426e-13	LCK/CD28/ITGA4/INPP5D/PTPN22/SLAMF8/NCKAP1L/ITK/VAV1/BATF/TNFSF13B/PREX1/CRTAM/CD3G/CD3D/PTPRC/TBX21/IKZF3/DOCK2/SASH3	20
BP	GO:0002764	immune response-regulating signaling pathway	20/85	482/18800	3.06798e-14	1.74568e-11	1.32192e-11	KLHL6/LCK/CD28/INPP5D/GFI1/PTPN22/CTSS/MYO1G/NCKAP1L/BANK1/ITK/VAV1/LPXN/PTPRC/SARM1/PRKCB/PIK3AP1/SH2D1A/UBASH3A/LAX1	20
BP	GO:0002429	immune response-activating cell surface receptor signaling pathway	16/85	300/18800	3.46593e-13	1.18327e-10	8.96034e-11	KLHL6/LCK/CD28/INPP5D/PTPN22/MYO1G/NCKAP1L/BANK1/ITK/VAV1/LPXN/PTPRC/PRKCB/SH2D1A/UBASH3A/LAX1	16
BP	GO:0002757	immune response-activating signal transduction	16/85	300/18800	3.46593e-13	1.18327e-10	8.96034e-11	KLHL6/LCK/CD28/INPP5D/PTPN22/MYO1G/NCKAP1L/BANK1/ITK/VAV1/LPXN/PTPRC/PRKCB/SH2D1A/UBASH3A/LAX1	16
BP	GO:0030217	T cell differentiation	15/85	263/18800	7.74507e-13	2.20347e-10	1.66859e-10	LCK/CD28/PTPN22/NCKAP1L/ITK/VAV1/BATF/PREX1/CRTAM/CD3G/CD3D/PTPRC/TBX21/DOCK2/SASH3	15
BP	GO:0007159	leukocyte cell-cell adhesion	17/85	381/18800	1.04667e-12	2.55239e-10	1.93281e-10	LCK/ICOS/CD28/ITGA4/PTPN22/NCKAP1L/ITGB7/VAV1/PDCD1LG2/TNFSF13B/CRTAM/PTPRC/CCL5/TBX21/CCDC88B/SASH3/LAX1	17
BP	GO:0002768	immune response-regulating cell surface receptor signaling pathway	16/85	328/18800	1.3571e-12	2.8957e-10	2.19278e-10	KLHL6/LCK/CD28/INPP5D/PTPN22/MYO1G/NCKAP1L/BANK1/ITK/VAV1/LPXN/PTPRC/PRKCB/SH2D1A/UBASH3A/LAX1	16
BP	GO:1903037	regulation of leukocyte cell-cell adhesion	16/85	344/18800	2.79791e-12	5.30671e-10	4.01852e-10	LCK/ICOS/CD28/ITGA4/PTPN22/NCKAP1L/VAV1/PDCD1LG2/TNFSF13B/CRTAM/PTPRC/CCL5/TBX21/CCDC88B/SASH3/LAX1	16
BP	GO:0050851	antigen receptor-mediated signaling pathway	14/85	244/18800	4.44329e-12	7.5847e-10	5.74354e-10	KLHL6/LCK/CD28/INPP5D/PTPN22/NCKAP1L/BANK1/ITK/LPXN/PTPRC/PRKCB/SH2D1A/UBASH3A/LAX1	14
BP	GO:0002683	negative regulation of immune system process	17/85	425/18800	5.98075e-12	8.9837e-10	6.80294e-10	CD96/INPP5D/PTPN22/SLAMF8/NCKAP1L/BANK1/PDCD1LG2/LPXN/CRTAM/PTPRC/NLRC5/TBX21/NLRC3/TBC1D10C/SH2D1A/UBASH3A/LAX1	17
BP	GO:0046631	alpha-beta T cell activation	12/85	158/18800	6.31543e-12	8.9837e-10	6.80294e-10	CD28/PTPN22/NCKAP1L/ITK/BATF/CRTAM/PTPRC/NKG7/TBX21/DOCK2/WDFY4/SASH3	12
BP	GO:0002253	activation of immune response	16/85	386/18800	1.58585e-11	2.08234e-09	1.57686e-09	KLHL6/LCK/CD28/INPP5D/PTPN22/MYO1G/NCKAP1L/BANK1/ITK/VAV1/LPXN/PTPRC/PRKCB/SH2D1A/UBASH3A/LAX1	16
BP	GO:0042113	B cell activation	15/85	336/18800	2.5802e-11	3.146e-09	2.38232e-09	CD28/ITGA4/INPP5D/SLAMF8/NCKAP1L/BANK1/BATF/TNFSF13B/PTPRC/TBX21/IKZF3/PRKCB/TBC1D10C/SASH3/LAX1	15
BP	GO:0050863	regulation of T cell activation	15/85	342/18800	3.31271e-11	3.76986e-09	2.85474e-09	LCK/ICOS/CD28/PTPN22/NCKAP1L/VAV1/PDCD1LG2/TNFSF13B/CRTAM/PTPRC/CCL5/TBX21/CCDC88B/SASH3/LAX1	15
BP	GO:1903039	positive regulation of leukocyte cell-cell adhesion	13/85	245/18800	7.31611e-11	7.80538e-09	5.91065e-09	LCK/ICOS/CD28/ITGA4/PTPN22/NCKAP1L/VAV1/PDCD1LG2/TNFSF13B/PTPRC/CCL5/CCDC88B/SASH3	13
BP	GO:0002449	lymphocyte mediated immunity	15/85	365/18800	8.26886e-11	8.30291e-09	6.28741e-09	CD96/CD28/INPP5D/SLAMF7/MYO1G/NCKAP1L/VAV1/BATF/CRTAM/PTPRC/NKG7/TBX21/IL21R/SH2D1A/SASH3	15
BP	GO:0022407	regulation of cell-cell adhesion	16/85	456/18800	1.87355e-10	1.77675e-08	1.34545e-08	LCK/ICOS/CD28/ITGA4/PTPN22/NCKAP1L/VAV1/PDCD1LG2/TNFSF13B/CRTAM/PTPRC/CCL5/TBX21/CCDC88B/SASH3/LAX1	16
BP	GO:0050870	positive regulation of T cell activation	12/85	223/18800	3.54355e-10	3.1836e-08	2.41079e-08	LCK/ICOS/CD28/PTPN22/NCKAP1L/VAV1/PDCD1LG2/TNFSF13B/PTPRC/CCL5/CCDC88B/SASH3	12
BP	GO:0050670	regulation of lymphocyte proliferation	12/85	230/18800	5.05334e-10	4.31303e-08	3.26605e-08	CD28/INPP5D/PTPN22/NCKAP1L/PDCD1LG2/TNFSF13B/CRTAM/PTPRC/CCL5/IKZF3/CCDC88B/SASH3	12
BP	GO:0032944	regulation of mononuclear cell proliferation	12/85	233/18800	5.86228e-10	4.7461e-08	3.594e-08	CD28/INPP5D/PTPN22/NCKAP1L/PDCD1LG2/TNFSF13B/CRTAM/PTPRC/CCL5/IKZF3/CCDC88B/SASH3	12
BP	GO:0022409	positive regulation of cell-cell adhesion	13/85	291/18800	6.11682e-10	4.7461e-08	3.594e-08	LCK/ICOS/CD28/ITGA4/PTPN22/NCKAP1L/VAV1/PDCD1LG2/TNFSF13B/PTPRC/CCL5/CCDC88B/SASH3	13
BP	GO:0046651	lymphocyte proliferation	13/85	296/18800	7.53228e-10	5.59026e-08	4.23324e-08	CD28/INPP5D/PTPN22/NCKAP1L/PDCD1LG2/TNFSF13B/CRTAM/PTPRC/CCL5/IKZF3/DOCK2/CCDC88B/SASH3	13
BP	GO:0032943	mononuclear cell proliferation	13/85	300/18800	8.87226e-10	6.20527e-08	4.69896e-08	CD28/INPP5D/PTPN22/NCKAP1L/PDCD1LG2/TNFSF13B/CRTAM/PTPRC/CCL5/IKZF3/DOCK2/CCDC88B/SASH3	13
BP	GO:0042102	positive regulation of T cell proliferation	9/85	103/18800	9.08798e-10	6.20527e-08	4.69896e-08	CD28/PTPN22/NCKAP1L/PDCD1LG2/TNFSF13B/PTPRC/CCL5/CCDC88B/SASH3	9
BP	GO:0051251	positive regulation of lymphocyte activation	14/85	371/18800	1.13733e-09	7.46699e-08	5.6544e-08	LCK/ICOS/CD28/INPP5D/PTPN22/NCKAP1L/VAV1/PDCD1LG2/TNFSF13B/PTPRC/CCL5/TBX21/CCDC88B/SASH3	14
BP	GO:0070663	regulation of leukocyte proliferation	12/85	254/18800	1.56795e-09	9.81628e-08	7.43341e-08	CD28/INPP5D/PTPN22/NCKAP1L/PDCD1LG2/TNFSF13B/CRTAM/PTPRC/CCL5/IKZF3/CCDC88B/SASH3	12
BP	GO:0050864	regulation of B cell activation	11/85	200/18800	1.61017e-09	9.81628e-08	7.43341e-08	CD28/INPP5D/SLAMF8/NCKAP1L/BANK1/TNFSF13B/PTPRC/TBX21/IKZF3/TBC1D10C/SASH3	11
BP	GO:0002443	leukocyte mediated immunity	15/85	457/18800	1.84405e-09	1.08545e-07	8.21959e-08	CD96/CD28/INPP5D/SLAMF7/MYO1G/NCKAP1L/VAV1/BATF/CRTAM/PTPRC/NKG7/TBX21/IL21R/SH2D1A/SASH3	15
BP	GO:0042098	T cell proliferation	11/85	204/18800	1.98422e-09	1.12902e-07	8.54955e-08	CD28/PTPN22/NCKAP1L/PDCD1LG2/TNFSF13B/CRTAM/PTPRC/CCL5/DOCK2/CCDC88B/SASH3	11
BP	GO:0045058	T cell selection	7/85	49/18800	2.21218e-09	1.21813e-07	9.2243e-08	CD28/BATF/CD3G/CD3D/PTPRC/TBX21/DOCK2	7
BP	GO:0070661	leukocyte proliferation	13/85	330/18800	2.81718e-09	1.50279e-07	1.13799e-07	CD28/INPP5D/PTPN22/NCKAP1L/PDCD1LG2/TNFSF13B/CRTAM/PTPRC/CCL5/IKZF3/DOCK2/CCDC88B/SASH3	13
BP	GO:0002696	positive regulation of leukocyte activation	14/85	421/18800	5.75243e-09	2.97557e-07	2.25326e-07	LCK/ICOS/CD28/INPP5D/PTPN22/NCKAP1L/VAV1/PDCD1LG2/TNFSF13B/PTPRC/CCL5/TBX21/CCDC88B/SASH3	14
BP	GO:0042129	regulation of T cell proliferation	10/85	174/18800	6.11898e-09	3.07209e-07	2.32635e-07	CD28/PTPN22/NCKAP1L/PDCD1LG2/TNFSF13B/CRTAM/PTPRC/CCL5/CCDC88B/SASH3	10
BP	GO:0050853	B cell receptor signaling pathway	9/85	131/18800	7.72882e-09	3.76946e-07	2.85444e-07	KLHL6/LCK/PTPN22/NCKAP1L/BANK1/ITK/LPXN/PTPRC/PRKCB	9
BP	GO:0050867	positive regulation of cell activation	14/85	436/18800	8.96767e-09	4.25217e-07	3.21997e-07	LCK/ICOS/CD28/INPP5D/PTPN22/NCKAP1L/VAV1/PDCD1LG2/TNFSF13B/PTPRC/CCL5/TBX21/CCDC88B/SASH3	14
BP	GO:0045785	positive regulation of cell adhesion	14/85	446/18800	1.19418e-08	5.50938e-07	4.17199e-07	LCK/ICOS/CD28/ITGA4/PTPN22/NCKAP1L/VAV1/PDCD1LG2/TNFSF13B/PREX1/PTPRC/CCL5/CCDC88B/SASH3	14
BP	GO:0043368	positive T cell selection	6/85	36/18800	1.24767e-08	5.60467e-07	4.24415e-07	BATF/CD3G/CD3D/PTPRC/TBX21/DOCK2	6
BP	GO:0050671	positive regulation of lymphocyte proliferation	9/85	141/18800	1.47442e-08	6.45343e-07	4.88688e-07	CD28/PTPN22/NCKAP1L/PDCD1LG2/TNFSF13B/PTPRC/CCL5/CCDC88B/SASH3	9
BP	GO:0002695	negative regulation of leukocyte activation	10/85	193/18800	1.65246e-08	6.94333e-07	5.25786e-07	INPP5D/PTPN22/NCKAP1L/BANK1/PDCD1LG2/CRTAM/PTPRC/TBX21/TBC1D10C/LAX1	10
BP	GO:0032946	positive regulation of mononuclear cell proliferation	9/85	143/18800	1.6677e-08	6.94333e-07	5.25786e-07	CD28/PTPN22/NCKAP1L/PDCD1LG2/TNFSF13B/PTPRC/CCL5/CCDC88B/SASH3	9
BP	GO:0050900	leukocyte migration	13/85	384/18800	1.72091e-08	6.99426e-07	5.29642e-07	TRPM2/LCK/ITGA4/SLAMF8/MYO1G/NCKAP1L/ITGB7/VAV1/PREX1/CRTAM/CCL5/TBX21/CCR5	13
BP	GO:0050854	regulation of antigen receptor-mediated signaling pathway	7/85	66/18800	1.88538e-08	7.48451e-07	5.66767e-07	LCK/PTPN22/LPXN/PTPRC/PRKCB/SH2D1A/UBASH3A	7
BP	GO:0070665	positive regulation of leukocyte proliferation	9/85	158/18800	3.97199e-08	1.54095e-06	1.16689e-06	CD28/PTPN22/NCKAP1L/PDCD1LG2/TNFSF13B/PTPRC/CCL5/CCDC88B/SASH3	9
BP	GO:0045061	thymic T cell selection	5/85	22/18800	4.1573e-08	1.577e-06	1.19419e-06	CD28/CD3G/CD3D/PTPRC/DOCK2	5
BP	GO:0051250	negative regulation of lymphocyte activation	9/85	161/18800	4.67392e-08	1.73443e-06	1.3134e-06	INPP5D/PTPN22/NCKAP1L/BANK1/PDCD1LG2/CRTAM/TBX21/TBC1D10C/LAX1	9
BP	GO:0050866	negative regulation of cell activation	10/85	216/18800	4.80616e-08	1.74556e-06	1.32183e-06	INPP5D/PTPN22/NCKAP1L/BANK1/PDCD1LG2/CRTAM/PTPRC/TBX21/TBC1D10C/LAX1	10
BP	GO:0031295	T cell costimulation	6/85	45/18800	5.05077e-08	1.79618e-06	1.36016e-06	LCK/ICOS/CD28/VAV1/PDCD1LG2/TNFSF13B	6
BP	GO:1902105	regulation of leukocyte differentiation	11/85	283/18800	5.89208e-08	2.05261e-06	1.55434e-06	HCLS1/CD28/INPP5D/SLAMF8/NCKAP1L/CRTAM/PTPRC/TESC/TBX21/IKZF3/SASH3	11
BP	GO:0031294	lymphocyte costimulation	6/85	47/18800	6.61056e-08	2.25685e-06	1.709e-06	LCK/ICOS/CD28/VAV1/PDCD1LG2/TNFSF13B	6
BP	GO:0002706	regulation of lymphocyte mediated immunity	9/85	175/18800	9.58136e-08	3.20694e-06	2.42846e-06	CD96/CD28/NCKAP1L/VAV1/CRTAM/PTPRC/TBX21/SH2D1A/SASH3	9
BP	GO:0050852	T cell receptor signaling pathway	8/85	127/18800	1.08119e-07	3.54921e-06	2.68765e-06	LCK/CD28/INPP5D/PTPN22/ITK/PTPRC/SH2D1A/UBASH3A	8
BP	GO:0045619	regulation of lymphocyte differentiation	9/85	181/18800	1.2786e-07	4.11805e-06	3.11841e-06	CD28/INPP5D/SLAMF8/NCKAP1L/CRTAM/PTPRC/TBX21/IKZF3/SASH3	9
BP	GO:0071674	mononuclear cell migration	9/85	199/18800	2.8629e-07	9.04993e-06	6.85309e-06	TRPM2/ITGA4/SLAMF8/MYO1G/ITGB7/CRTAM/CCL5/TBX21/CCR5	9
BP	GO:0045059	positive thymic T cell selection	4/85	14/18800	3.76305e-07	1.16791e-05	8.84407e-06	CD3G/CD3D/PTPRC/DOCK2	4
BP	GO:0030888	regulation of B cell proliferation	6/85	64/18800	4.34146e-07	1.32337e-05	1.00213e-05	INPP5D/NCKAP1L/TNFSF13B/PTPRC/IKZF3/SASH3	6
BP	GO:0046634	regulation of alpha-beta T cell activation	7/85	105/18800	4.78191e-07	1.43206e-05	1.08443e-05	CD28/PTPN22/NCKAP1L/CRTAM/PTPRC/TBX21/SASH3	7
BP	GO:0002697	regulation of immune effector process	11/85	353/18800	5.40237e-07	1.58997e-05	1.20401e-05	CD96/CD28/PTPN22/SLAMF8/NCKAP1L/VAV1/CRTAM/PTPRC/TBX21/SH2D1A/SASH3	11
BP	GO:0002460	adaptive immune response based on somatic recombination of immune receptors built from immunoglobulin superfamily domains	11/85	370/18800	8.58128e-07	2.48275e-05	1.88007e-05	KLHL6/CD28/INPP5D/MYO1G/NCKAP1L/BATF/TNFSF13B/PTPRC/TBX21/IL21R/SASH3	11
BP	GO:1903706	regulation of hemopoiesis	11/85	371/18800	8.81132e-07	2.50682e-05	1.8983e-05	HCLS1/CD28/INPP5D/SLAMF8/NCKAP1L/CRTAM/PTPRC/TESC/TBX21/IKZF3/SASH3	11
BP	GO:0002708	positive regulation of lymphocyte mediated immunity	7/85	117/18800	9.97505e-07	2.75352e-05	2.08511e-05	CD28/VAV1/CRTAM/PTPRC/TBX21/SH2D1A/SASH3	7
BP	GO:0045088	regulation of innate immune response	9/85	231/18800	1.00011e-06	2.75352e-05	2.08511e-05	CD96/PTPN22/SLAMF8/VAV1/CRTAM/NLRC5/CCL5/NLRC3/SH2D1A	9
BP	GO:0002228	natural killer cell mediated immunity	6/85	75/18800	1.12069e-06	3.03654e-05	2.29943e-05	CD96/SLAMF7/VAV1/CRTAM/NKG7/SH2D1A	6
BP	GO:0002703	regulation of leukocyte mediated immunity	9/85	236/18800	1.19476e-06	3.18666e-05	2.41311e-05	CD96/CD28/NCKAP1L/VAV1/CRTAM/PTPRC/TBX21/SH2D1A/SASH3	9
BP	GO:0001819	positive regulation of cytokine production	12/85	475/18800	1.45683e-06	3.82587e-05	2.89715e-05	CD28/PTPN22/TWIST1/ITK/BATF/CRTAM/SORL1/PTPRC/TBX21/LTB/CCDC88B/SASH3	12
BP	GO:0050777	negative regulation of immune response	8/85	179/18800	1.48829e-06	3.84925e-05	2.91486e-05	CD96/INPP5D/SLAMF8/NCKAP1L/PTPRC/NLRC5/TBX21/NLRC3	8
BP	GO:0019221	cytokine-mediated signaling pathway	12/85	486/18800	1.84817e-06	4.70871e-05	3.56568e-05	IFNAR2/STAT4/GFI1/TNFSF13B/PTPRC/NLRC5/CCL5/NAIP/CCR5/CXCR6/IL21R/IL2RG	12
BP	GO:0001909	leukocyte mediated cytotoxicity	7/85	131/18800	2.13334e-06	5.35532e-05	4.05534e-05	SLAMF7/NCKAP1L/VAV1/CRTAM/PTPRC/NKG7/SH2D1A	7
BP	GO:0033627	cell adhesion mediated by integrin	6/85	86/18800	2.51508e-06	6.22208e-05	4.71169e-05	ITGA4/NCKAP1L/ITGB7/LPXN/TESC/CCL5	6
BP	GO:0002705	positive regulation of leukocyte mediated immunity	7/85	138/18800	3.01942e-06	7.36307e-05	5.57571e-05	CD28/VAV1/CRTAM/PTPRC/TBX21/SH2D1A/SASH3	7
BP	GO:0030183	B cell differentiation	7/85	142/18800	3.65091e-06	8.77761e-05	6.64687e-05	ITGA4/INPP5D/SLAMF8/NCKAP1L/TNFSF13B/PTPRC/IKZF3	7
BP	GO:0002407	dendritic cell chemotaxis	4/85	26/18800	5.39234e-06	0.000127843	9.68098e-05	TRPM2/SLAMF8/CCL5/CCR5	4
BP	GO:0001818	negative regulation of cytokine production	10/85	363/18800	5.5051e-06	0.000128729	9.74804e-05	CD96/INPP5D/PTPN22/TWIST1/NCKAP1L/BANK1/PDCD1LG2/PTPRC/TBX21/NLRC3	10
BP	GO:0050871	positive regulation of B cell activation	7/85	152/18800	5.72627e-06	0.000132091	0.000100027	CD28/INPP5D/NCKAP1L/TNFSF13B/PTPRC/TBX21/SASH3	7
BP	GO:0042100	B cell proliferation	6/85	100/18800	6.06344e-06	0.000138004	0.000104504	INPP5D/NCKAP1L/TNFSF13B/PTPRC/IKZF3/SASH3	6
BP	GO:0036037	CD8-positive, alpha-beta T cell activation	4/85	27/18800	6.30836e-06	0.000141689	0.000107295	PTPN22/NCKAP1L/CRTAM/WDFY4	4
BP	GO:0007162	negative regulation of cell adhesion	9/85	305/18800	9.67352e-06	0.000214451	0.000162393	PTPN22/PLXNC1/NCKAP1L/PDCD1LG2/LPXN/CRTAM/PTPRC/TBX21/LAX1	9
BP	GO:0048304	positive regulation of isotype switching to IgG isotypes	3/85	10/18800	1.04615e-05	0.000228947	0.000173371	CD28/PTPRC/TBX21	3
BP	GO:0014066	regulation of phosphatidylinositol 3-kinase signaling	6/85	111/18800	1.10703e-05	0.000238027	0.000180247	HCLS1/CD28/TWIST1/CCL5/NLRC3/PIK3AP1	6
BP	GO:0045577	regulation of B cell differentiation	4/85	31/18800	1.11553e-05	0.000238027	0.000180247	INPP5D/SLAMF8/NCKAP1L/IKZF3	4
BP	GO:0045060	negative thymic T cell selection	3/85	11/18800	1.43376e-05	0.000296316	0.000224386	CD28/PTPRC/DOCK2	3
BP	GO:0036336	dendritic cell migration	4/85	33/18800	1.44079e-05	0.000296316	0.000224386	TRPM2/SLAMF8/CCL5/CCR5	4
BP	GO:0050858	negative regulation of antigen receptor-mediated signaling pathway	4/85	33/18800	1.44079e-05	0.000296316	0.000224386	PTPN22/LPXN/SH2D1A/UBASH3A	4
BP	GO:0032715	negative regulation of interleukin-6 production	5/85	69/18800	1.5019e-05	0.000301618	0.000228401	INPP5D/PTPN22/NCKAP1L/BANK1/NLRC3	5
BP	GO:0046635	positive regulation of alpha-beta T cell activation	5/85	69/18800	1.5019e-05	0.000301618	0.000228401	CD28/PTPN22/NCKAP1L/PTPRC/SASH3	5
BP	GO:0002699	positive regulation of immune effector process	8/85	248/18800	1.64262e-05	0.000323442	0.000244927	CD28/PTPN22/VAV1/CRTAM/PTPRC/TBX21/SH2D1A/SASH3	8
BP	GO:0072676	lymphocyte migration	6/85	119/18800	1.64847e-05	0.000323442	0.000244927	ITGA4/MYO1G/ITGB7/CRTAM/CCL5/TBX21	6
BP	GO:0042267	natural killer cell mediated cytotoxicity	5/85	72/18800	1.85007e-05	0.000358871	0.000271756	SLAMF7/VAV1/CRTAM/NKG7/SH2D1A	5
BP	GO:0043383	negative T cell selection	3/85	12/18800	1.90544e-05	0.000365458	0.000276745	CD28/PTPRC/DOCK2	3
BP	GO:0001906	cell killing	7/85	185/18800	2.06128e-05	0.000390956	0.000296053	SLAMF7/NCKAP1L/VAV1/CRTAM/PTPRC/NKG7/SH2D1A	7
BP	GO:0050868	negative regulation of T cell activation	6/85	125/18800	2.18072e-05	0.000409065	0.000309766	PTPN22/NCKAP1L/PDCD1LG2/CRTAM/TBX21/LAX1	6
BP	GO:0033077	T cell differentiation in thymus	5/85	78/18800	2.73282e-05	0.000507057	0.000383971	CD28/CD3G/CD3D/PTPRC/DOCK2	5
BP	GO:0002831	regulation of response to biotic stimulus	9/85	351/18800	2.94084e-05	0.000539787	0.000408755	CD96/PTPN22/SLAMF8/VAV1/CRTAM/NLRC5/CCL5/NLRC3/SH2D1A	9
BP	GO:0048302	regulation of isotype switching to IgG isotypes	3/85	14/18800	3.13207e-05	0.000564427	0.000427414	CD28/PTPRC/TBX21	3
BP	GO:0046633	alpha-beta T cell proliferation	4/85	40/18800	3.14122e-05	0.000564427	0.000427414	CD28/PTPN22/PTPRC/DOCK2	4
BP	GO:0030890	positive regulation of B cell proliferation	4/85	42/18800	3.82083e-05	0.000679391	0.000514471	NCKAP1L/TNFSF13B/PTPRC/SASH3	4
BP	GO:0030852	regulation of granulocyte differentiation	3/85	15/18800	3.9023e-05	0.000679718	0.000514718	HCLS1/INPP5D/TESC	3
BP	GO:0048291	isotype switching to IgG isotypes	3/85	15/18800	3.9023e-05	0.000679718	0.000514718	CD28/PTPRC/TBX21	3
BP	GO:0001910	regulation of leukocyte mediated cytotoxicity	5/85	85/18800	4.1423e-05	0.000714232	0.000540855	NCKAP1L/VAV1/CRTAM/PTPRC/SH2D1A	5
BP	GO:0050856	regulation of T cell receptor signaling pathway	4/85	44/18800	4.60221e-05	0.000785597	0.000594896	LCK/PTPN22/SH2D1A/UBASH3A	4
BP	GO:0014065	phosphatidylinositol 3-kinase signaling	6/85	144/18800	4.83869e-05	0.000809769	0.0006132	HCLS1/CD28/TWIST1/CCL5/NLRC3/PIK3AP1	6
BP	GO:1903038	negative regulation of leukocyte cell-cell adhesion	6/85	144/18800	4.83869e-05	0.000809769	0.0006132	PTPN22/NCKAP1L/PDCD1LG2/CRTAM/TBX21/LAX1	6
BP	GO:0045580	regulation of T cell differentiation	6/85	151/18800	6.30441e-05	0.00104482	0.000791192	CD28/NCKAP1L/CRTAM/PTPRC/TBX21/SASH3	6
BP	GO:0030101	natural killer cell activation	5/85	93/18800	6.38009e-05	0.00104719	0.000792991	PTPN22/SLAMF7/PTPRC/NKG7/IL21R	5
BP	GO:0033628	regulation of cell adhesion mediated by integrin	4/85	48/18800	6.5065e-05	0.00105777	0.000801001	NCKAP1L/LPXN/TESC/CCL5	4
BP	GO:0002715	regulation of natural killer cell mediated immunity	4/85	50/18800	7.64817e-05	0.00123164	0.000932666	CD96/VAV1/CRTAM/SH2D1A	4
BP	GO:1902107	positive regulation of leukocyte differentiation	6/85	157/18800	7.82548e-05	0.00123686	0.000936617	HCLS1/INPP5D/NCKAP1L/PTPRC/TESC/SASH3	6
BP	GO:1903708	positive regulation of hemopoiesis	6/85	157/18800	7.82548e-05	0.00123686	0.000936617	HCLS1/INPP5D/NCKAP1L/PTPRC/TESC/SASH3	6
BP	GO:2001185	regulation of CD8-positive, alpha-beta T cell activation	3/85	19/18800	8.20265e-05	0.00128345	0.000971894	PTPN22/NCKAP1L/CRTAM	3
BP	GO:0002639	positive regulation of immunoglobulin production	4/85	51/18800	8.2706e-05	0.00128345	0.000971894	CD28/PTPRC/TBX21/SASH3	4
BP	GO:0002204	somatic recombination of immunoglobulin genes involved in immune response	4/85	52/18800	8.92907e-05	0.00133742	0.00101276	CD28/BATF/PTPRC/TBX21	4
BP	GO:0002208	somatic diversification of immunoglobulins involved in immune response	4/85	52/18800	8.92907e-05	0.00133742	0.00101276	CD28/BATF/PTPRC/TBX21	4
BP	GO:0045190	isotype switching	4/85	52/18800	8.92907e-05	0.00133742	0.00101276	CD28/BATF/PTPRC/TBX21	4
BP	GO:0060326	cell chemotaxis	8/85	315/18800	8.93178e-05	0.00133742	0.00101276	TRPM2/SLAMF8/NCKAP1L/VAV1/PREX1/CCL5/CCR5/CXCR6	8
BP	GO:0031341	regulation of cell killing	5/85	100/18800	9.01662e-05	0.00133838	0.00101349	NCKAP1L/VAV1/CRTAM/PTPRC/SH2D1A	5
BP	GO:0046629	gamma-delta T cell activation	3/85	20/18800	9.61869e-05	0.00140903	0.00106699	NCKAP1L/ITK/PTPRC	3
BP	GO:0030595	leukocyte chemotaxis	7/85	236/18800	9.65766e-05	0.00140903	0.00106699	TRPM2/SLAMF8/NCKAP1L/VAV1/PREX1/CCL5/CCR5	7
BP	GO:0035710	CD4-positive, alpha-beta T cell activation	5/85	102/18800	9.90498e-05	0.00143286	0.00108504	NCKAP1L/BATF/NKG7/TBX21/SASH3	5
BP	GO:0006968	cellular defense response	4/85	54/18800	0.000103592	0.00148598	0.00112526	ITK/FCMR/CCR5/SH2D1A	4
BP	GO:0002700	regulation of production of molecular mediator of immune response	6/85	167/18800	0.000109992	0.00156464	0.00118483	CD96/CD28/PTPN22/PTPRC/TBX21/SASH3	6
BP	GO:0002707	negative regulation of lymphocyte mediated immunity	4/85	55/18800	0.000111333	0.00157063	0.00118936	CD96/NCKAP1L/PTPRC/TBX21	4
BP	GO:0032635	interleukin-6 production	6/85	172/18800	0.0001293	0.00179443	0.00135884	INPP5D/PTPN22/TWIST1/NCKAP1L/BANK1/NLRC3	6
BP	GO:0032675	regulation of interleukin-6 production	6/85	172/18800	0.0001293	0.00179443	0.00135884	INPP5D/PTPN22/TWIST1/NCKAP1L/BANK1/NLRC3	6
BP	GO:0002822	regulation of adaptive immune response based on somatic recombination of immune receptors built from immunoglobulin superfamily domains	6/85	173/18800	0.000133466	0.00182261	0.00138018	CD28/NCKAP1L/TNFSF13B/PTPRC/TBX21/SASH3	6
BP	GO:0007259	receptor signaling pathway via JAK-STAT	6/85	173/18800	0.000133466	0.00182261	0.00138018	IFNAR2/HCLS1/STAT4/PTPRC/CCL5/CRLF3	6
BP	GO:0034446	substrate adhesion-dependent cell spreading	5/85	109/18800	0.000135539	0.00183623	0.00139049	ITGA4/ITGB7/PARVG/PREX1/LPXN	5
BP	GO:0001912	positive regulation of leukocyte mediated cytotoxicity	4/85	58/18800	0.000137078	0.00184246	0.00139521	VAV1/CRTAM/PTPRC/SH2D1A	4
BP	GO:0002824	positive regulation of adaptive immune response based on somatic recombination of immune receptors built from immunoglobulin superfamily domains	5/85	110/18800	0.000141493	0.00188694	0.00142889	CD28/TNFSF13B/PTPRC/TBX21/SASH3	5
BP	GO:0046632	alpha-beta T cell differentiation	5/85	111/18800	0.000147645	0.00194296	0.00147131	NCKAP1L/ITK/BATF/TBX21/SASH3	5
BP	GO:0046641	positive regulation of alpha-beta T cell proliferation	3/85	23/18800	0.00014797	0.00194296	0.00147131	CD28/PTPN22/PTPRC	3
BP	GO:0048015	phosphatidylinositol-mediated signaling	6/85	177/18800	0.000151206	0.00197029	0.00149201	HCLS1/CD28/TWIST1/CCL5/NLRC3/PIK3AP1	6
BP	GO:0002456	T cell mediated immunity	5/85	112/18800	0.000153999	0.00197652	0.00149672	MYO1G/NCKAP1L/PTPRC/TBX21/SASH3	5
BP	GO:0002698	negative regulation of immune effector process	5/85	112/18800	0.000153999	0.00197652	0.00149672	CD96/SLAMF8/NCKAP1L/PTPRC/TBX21	5
BP	GO:0016447	somatic recombination of immunoglobulin gene segments	4/85	60/18800	0.000156473	0.00199327	0.00150941	CD28/BATF/PTPRC/TBX21	4
BP	GO:0034113	heterotypic cell-cell adhesion	4/85	61/18800	0.000166879	0.00211009	0.00159788	LCK/ITGA4/ITGB7/PTPRC	4
BP	GO:0050855	regulation of B cell receptor signaling pathway	3/85	24/18800	0.000168557	0.00211564	0.00160208	PTPN22/LPXN/PRKCB	3
BP	GO:0048017	inositol lipid-mediated signaling	6/85	181/18800	0.000170765	0.0021277	0.00161121	HCLS1/CD28/TWIST1/CCL5/NLRC3/PIK3AP1	6
BP	GO:0002821	positive regulation of adaptive immune response	5/85	115/18800	0.000174324	0.00215631	0.00163288	CD28/TNFSF13B/PTPRC/TBX21/SASH3	5
BP	GO:0097696	receptor signaling pathway via STAT	6/85	184/18800	0.000186706	0.00225824	0.00171006	IFNAR2/HCLS1/STAT4/PTPRC/CCL5/CRLF3	6
BP	GO:0032609	interferon-gamma production	5/85	117/18800	0.000188971	0.00225824	0.00171006	CD96/PTPN22/PDCD1LG2/CRTAM/SASH3	5
BP	GO:0032649	regulation of interferon-gamma production	5/85	117/18800	0.000188971	0.00225824	0.00171006	CD96/PTPN22/PDCD1LG2/CRTAM/SASH3	5
BP	GO:0032623	interleukin-2 production	4/85	63/18800	0.000189179	0.00225824	0.00171006	CD28/PTPRC/TBX21/SASH3	4
BP	GO:0032663	regulation of interleukin-2 production	4/85	63/18800	0.000189179	0.00225824	0.00171006	CD28/PTPRC/TBX21/SASH3	4
BP	GO:0050860	negative regulation of T cell receptor signaling pathway	3/85	25/18800	0.000190918	0.00226317	0.0017138	PTPN22/SH2D1A/UBASH3A	3
BP	GO:0002819	regulation of adaptive immune response	6/85	188/18800	0.000209766	0.00243182	0.0018415	CD28/NCKAP1L/TNFSF13B/PTPRC/TBX21/SASH3	6
BP	GO:0002702	positive regulation of production of molecular mediator of immune response	5/85	120/18800	0.00021268	0.00243182	0.0018415	CD28/PTPN22/PTPRC/TBX21/SASH3	5
BP	GO:0031343	positive regulation of cell killing	4/85	65/18800	0.000213552	0.00243182	0.0018415	VAV1/CRTAM/PTPRC/SH2D1A	4
BP	GO:0002433	immune response-regulating cell surface receptor signaling pathway involved in phagocytosis	3/85	26/18800	0.000215117	0.00243182	0.0018415	MYO1G/VAV1/PTPRC	3
BP	GO:0038096	Fc-gamma receptor signaling pathway involved in phagocytosis	3/85	26/18800	0.000215117	0.00243182	0.0018415	MYO1G/VAV1/PTPRC	3
BP	GO:0042832	defense response to protozoan	3/85	26/18800	0.000215117	0.00243182	0.0018415	BATF/NKG7/CCDC88B	3
BP	GO:0050857	positive regulation of antigen receptor-mediated signaling pathway	3/85	26/18800	0.000215117	0.00243182	0.0018415	LCK/PTPRC/PRKCB	3
BP	GO:0002224	toll-like receptor signaling pathway	5/85	123/18800	0.000238591	0.00260607	0.00197346	GFI1/PTPN22/CTSS/SARM1/PIK3AP1	5
BP	GO:0002704	negative regulation of leukocyte mediated immunity	4/85	67/18800	0.00024011	0.00260607	0.00197346	CD96/NCKAP1L/PTPRC/TBX21	4
BP	GO:0072678	T cell migration	4/85	67/18800	0.00024011	0.00260607	0.00197346	ITGA4/MYO1G/ITGB7/CCL5	4
BP	GO:0043087	regulation of GTPase activity	8/85	364/18800	0.000240433	0.00260607	0.00197346	ARHGAP15/PLXNC1/ARHGAP9/VAV1/PREX1/CCL5/TBC1D2B/TBC1D10C	8
BP	GO:0001562	response to protozoan	3/85	27/18800	0.000241218	0.00260607	0.00197346	BATF/NKG7/CCDC88B	3
BP	GO:0002710	negative regulation of T cell mediated immunity	3/85	27/18800	0.000241218	0.00260607	0.00197346	NCKAP1L/PTPRC/TBX21	3
BP	GO:0045954	positive regulation of natural killer cell mediated cytotoxicity	3/85	27/18800	0.000241218	0.00260607	0.00197346	VAV1/CRTAM/SH2D1A	3
BP	GO:0016445	somatic diversification of immunoglobulins	4/85	69/18800	0.000268964	0.00287292	0.00217553	CD28/BATF/PTPRC/TBX21	4
BP	GO:0045830	positive regulation of isotype switching	3/85	28/18800	0.000269284	0.00287292	0.00217553	CD28/PTPRC/TBX21	3
BP	GO:0002562	somatic diversification of immune receptors via germline recombination within a single locus	4/85	70/18800	0.000284288	0.00298384	0.00225952	CD28/BATF/PTPRC/TBX21	4
BP	GO:0016444	somatic cell DNA recombination	4/85	70/18800	0.000284288	0.00298384	0.00225952	CD28/BATF/PTPRC/TBX21	4
BP	GO:0022408	negative regulation of cell-cell adhesion	6/85	199/18800	0.000284925	0.00298384	0.00225952	PTPN22/NCKAP1L/PDCD1LG2/CRTAM/TBX21/LAX1	6
BP	GO:1990266	neutrophil migration	5/85	128/18800	0.000287034	0.00298761	0.00226237	SLAMF8/NCKAP1L/VAV1/PREX1/CCL5	5
BP	GO:0050766	positive regulation of phagocytosis	4/85	71/18800	0.000300229	0.00309123	0.00234085	NCKAP1L/PTPRC/DOCK2/IL2RG	4
BP	GO:0002285	lymphocyte activation involved in immune response	6/85	201/18800	0.000300612	0.00309123	0.00234085	CD28/NCKAP1L/BATF/PTPRC/NKG7/TBX21	6
BP	GO:0002366	leukocyte activation involved in immune response	7/85	285/18800	0.000307658	0.00314474	0.00238137	CD28/NCKAP1L/BATF/PTPRC/NKG7/TBX21/DOCK2	7
BP	GO:0038094	Fc-gamma receptor signaling pathway	3/85	30/18800	0.000331558	0.00332127	0.00251504	MYO1G/VAV1/PTPRC	3
BP	GO:0002381	immunoglobulin production involved in immunoglobulin-mediated immune response	4/85	73/18800	0.00033402	0.00332127	0.00251504	CD28/BATF/PTPRC/TBX21	4
BP	GO:0045824	negative regulation of innate immune response	4/85	73/18800	0.00033402	0.00332127	0.00251504	CD96/SLAMF8/NLRC5/NLRC3	4
BP	GO:0002263	cell activation involved in immune response	7/85	289/18800	0.000334657	0.00332127	0.00251504	CD28/NCKAP1L/BATF/PTPRC/NKG7/TBX21/DOCK2	7
BP	GO:0031349	positive regulation of defense response	7/85	289/18800	0.000334657	0.00332127	0.00251504	CD28/VAV1/CRTAM/NLRC5/NKG7/CCL5/SH2D1A	7
BP	GO:0002637	regulation of immunoglobulin production	4/85	74/18800	0.000351898	0.00347219	0.00262933	CD28/PTPRC/TBX21/SASH3	4
BP	GO:0002717	positive regulation of natural killer cell mediated immunity	3/85	32/18800	0.000402423	0.00394791	0.00298957	VAV1/CRTAM/SH2D1A	3
BP	GO:0045089	positive regulation of innate immune response	5/85	140/18800	0.00043364	0.00422985	0.00320306	VAV1/CRTAM/NLRC5/CCL5/SH2D1A	5
BP	GO:0016064	immunoglobulin mediated immune response	6/85	216/18800	0.000441062	0.0042552	0.00322226	CD28/INPP5D/BATF/PTPRC/TBX21/IL21R	6
BP	GO:0002431	Fc receptor mediated stimulatory signaling pathway	3/85	33/18800	0.000441224	0.0042552	0.00322226	MYO1G/VAV1/PTPRC	3
BP	GO:0014068	positive regulation of phosphatidylinositol 3-kinase signaling	4/85	79/18800	0.000451705	0.0043318	0.00328027	HCLS1/CD28/CCL5/PIK3AP1	4
BP	GO:0002200	somatic diversification of immune receptors	4/85	80/18800	0.000473852	0.00449942	0.0034072	CD28/BATF/PTPRC/TBX21	4
BP	GO:0019724	B cell mediated immunity	6/85	219/18800	0.000474455	0.00449942	0.0034072	CD28/INPP5D/BATF/PTPRC/TBX21/IL21R	6
BP	GO:0032743	positive regulation of interleukin-2 production	3/85	34/18800	0.000482349	0.004549	0.00344475	CD28/PTPRC/SASH3	3
BP	GO:0043367	CD4-positive, alpha-beta T cell differentiation	4/85	82/18800	0.000520453	0.00488139	0.00369645	NCKAP1L/BATF/TBX21/SASH3	4
BP	GO:0050869	negative regulation of B cell activation	3/85	35/18800	0.000525852	0.00490508	0.00371439	INPP5D/BANK1/TBC1D10C	3
BP	GO:0002440	production of molecular mediator of immune response	7/85	312/18800	0.000529185	0.00490934	0.00371761	CD96/CD28/PTPN22/BATF/PTPRC/TBX21/SASH3	7
BP	GO:0030851	granulocyte differentiation	3/85	36/18800	0.000571791	0.00527593	0.00399522	HCLS1/INPP5D/TESC	3
BP	GO:2000106	regulation of leukocyte apoptotic process	4/85	85/18800	0.000596339	0.00547285	0.00414434	HCLS1/CD3G/CCL5/CCR5	4
BP	GO:0046640	regulation of alpha-beta T cell proliferation	3/85	37/18800	0.000620219	0.00565935	0.00428556	CD28/PTPN22/PTPRC	3
BP	GO:0002312	B cell activation involved in immune response	4/85	86/18800	0.000623291	0.00565935	0.00428556	CD28/BATF/PTPRC/TBX21	4
BP	GO:0001960	negative regulation of cytokine-mediated signaling pathway	4/85	87/18800	0.000651096	0.00588054	0.00445306	PTPRC/NLRC5/CCL5/NAIP	4
BP	GO:0097530	granulocyte migration	5/85	154/18800	0.000669205	0.00599855	0.00454242	SLAMF8/NCKAP1L/VAV1/PREX1/CCL5	5
BP	GO:0045191	regulation of isotype switching	3/85	38/18800	0.000671191	0.00599855	0.00454242	CD28/PTPRC/TBX21	3
BP	GO:0002709	regulation of T cell mediated immunity	4/85	88/18800	0.00067977	0.00604358	0.00457652	NCKAP1L/PTPRC/TBX21/SASH3	4
BP	GO:0060761	negative regulation of response to cytokine stimulus	4/85	92/18800	0.000803451	0.00710617	0.00538117	PTPRC/NLRC5/CCL5/NAIP	4
BP	GO:0002714	positive regulation of B cell mediated immunity	3/85	41/18800	0.000839895	0.00735231	0.00556756	CD28/PTPRC/TBX21	3
BP	GO:0002891	positive regulation of immunoglobulin mediated immune response	3/85	41/18800	0.000839895	0.00735231	0.00556756	CD28/PTPRC/TBX21	3
BP	GO:0032103	positive regulation of response to external stimulus	8/85	442/18800	0.000867346	0.00755387	0.0057202	CD28/NCKAP1L/VAV1/CRTAM/NLRC5/NKG7/CCL5/SH2D1A	8
BP	GO:0001915	negative regulation of T cell mediated cytotoxicity	2/85	10/18800	0.000887949	0.00765519	0.00579692	NCKAP1L/PTPRC	2
BP	GO:0002423	natural killer cell mediated immune response to tumor cell	2/85	10/18800	0.000887949	0.00765519	0.00579692	CRTAM/NKG7	2
BP	GO:0001959	regulation of cytokine-mediated signaling pathway	5/85	166/18800	0.000938075	0.00804671	0.00609339	GFI1/PTPRC/NLRC5/CCL5/NAIP	5
BP	GO:0045639	positive regulation of myeloid cell differentiation	4/85	99/18800	0.00105683	0.00897515	0.00679647	HCLS1/INPP5D/NCKAP1L/TESC	4
BP	GO:0050764	regulation of phagocytosis	4/85	99/18800	0.00105683	0.00897515	0.00679647	NCKAP1L/PTPRC/DOCK2/IL2RG	4
BP	GO:0046643	regulation of gamma-delta T cell activation	2/85	11/18800	0.00108208	0.00914415	0.00692444	NCKAP1L/PTPRC	2
BP	GO:0042269	regulation of natural killer cell mediated cytotoxicity	3/85	46/18800	0.00117672	0.00989491	0.00749296	VAV1/CRTAM/SH2D1A	3
BP	GO:0002221	pattern recognition receptor signaling pathway	5/85	176/18800	0.0012176	0.0101885	0.00771525	GFI1/PTPN22/CTSS/SARM1/PIK3AP1	5
BP	GO:0060759	regulation of response to cytokine stimulus	5/85	178/18800	0.00128018	0.0106599	0.00807222	GFI1/PTPRC/NLRC5/CCL5/NAIP	5
BP	GO:0034154	toll-like receptor 7 signaling pathway	2/85	12/18800	0.00129469	0.0107283	0.00812407	PTPN22/PIK3AP1	2
BP	GO:0031589	cell-substrate adhesion	7/85	364/18800	0.00130263	0.010742	0.00813438	CD96/ITGA4/MYO1G/ITGB7/PARVG/PREX1/LPXN	7
BP	GO:0043409	negative regulation of MAPK cascade	5/85	179/18800	0.00131235	0.0107701	0.0081557	PTPN22/SORL1/PTPRC/TBC1D10C/LAX1	5
BP	GO:0002833	positive regulation of response to biotic stimulus	5/85	180/18800	0.00134511	0.0109862	0.0083193	VAV1/CRTAM/NLRC5/CCL5/SH2D1A	5
BP	GO:0030593	neutrophil chemotaxis	4/85	106/18800	0.00136169	0.0110686	0.00838171	NCKAP1L/VAV1/PREX1/CCL5	4
BP	GO:0045621	positive regulation of lymphocyte differentiation	4/85	107/18800	0.00140974	0.0113194	0.00857169	INPP5D/NCKAP1L/PTPRC/SASH3	4
BP	GO:0032640	tumor necrosis factor production	5/85	182/18800	0.00141244	0.0113194	0.00857169	PTPN22/TWIST1/PTPRC/NLRC3/SASH3	5
BP	GO:0032680	regulation of tumor necrosis factor production	5/85	182/18800	0.00141244	0.0113194	0.00857169	PTPN22/TWIST1/PTPRC/NLRC3/SASH3	5
BP	GO:0043370	regulation of CD4-positive, alpha-beta T cell differentiation	3/85	50/18800	0.00149972	0.0118913	0.00900474	NCKAP1L/TBX21/SASH3	3
BP	GO:2000107	negative regulation of leukocyte apoptotic process	3/85	50/18800	0.00149972	0.0118913	0.00900474	HCLS1/CCL5/CCR5	3
BP	GO:0071887	leukocyte apoptotic process	4/85	109/18800	0.00150939	0.0118913	0.00900474	HCLS1/CD3G/CCL5/CCR5	4
BP	GO:0001768	establishment of T cell polarity	2/85	13/18800	0.0015256	0.0118913	0.00900474	CRTAM/DOCK2	2
BP	GO:0042492	gamma-delta T cell differentiation	2/85	13/18800	0.0015256	0.0118913	0.00900474	NCKAP1L/PTPRC	2
BP	GO:0072540	T-helper 17 cell lineage commitment	2/85	13/18800	0.0015256	0.0118913	0.00900474	BATF/TBX21	2
BP	GO:0071706	tumor necrosis factor superfamily cytokine production	5/85	187/18800	0.00159164	0.0122938	0.00930952	PTPN22/TWIST1/PTPRC/NLRC3/SASH3	5
BP	GO:1903555	regulation of tumor necrosis factor superfamily cytokine production	5/85	187/18800	0.00159164	0.0122938	0.00930952	PTPN22/TWIST1/PTPRC/NLRC3/SASH3	5
BP	GO:0038093	Fc receptor signaling pathway	3/85	52/18800	0.00168006	0.0129183	0.00978245	MYO1G/VAV1/PTPRC	3
BP	GO:0002832	negative regulation of response to biotic stimulus	4/85	113/18800	0.00172323	0.0131908	0.00998878	CD96/SLAMF8/NLRC5/NLRC3	4
BP	GO:0001767	establishment of lymphocyte polarity	2/85	14/18800	0.00177465	0.0134041	0.0101503	CRTAM/DOCK2	2
BP	GO:0002467	germinal center formation	2/85	14/18800	0.00177465	0.0134041	0.0101503	KLHL6/TNFSF13B	2
BP	GO:0045579	positive regulation of B cell differentiation	2/85	14/18800	0.00177465	0.0134041	0.0101503	INPP5D/NCKAP1L	2
BP	GO:0002823	negative regulation of adaptive immune response based on somatic recombination of immune receptors built from immunoglobulin superfamily domains	3/85	54/18800	0.00187342	0.0140878	0.010668	NCKAP1L/PTPRC/TBX21	3
BP	GO:0009615	response to virus	7/85	392/18800	0.00198615	0.01487	0.0112604	IFNAR2/PTPN22/PTPRC/NLRC5/CCL5/TBX21/WDFY4	7
BP	GO:0046007	negative regulation of activated T cell proliferation	2/85	15/18800	0.00204167	0.0151696	0.0114872	PDCD1LG2/CRTAM	2
BP	GO:0050727	regulation of inflammatory response	7/85	394/18800	0.00204394	0.0151696	0.0114872	CD28/SLAMF8/PTPRC/NKG7/CCL5/NLRC3/PIK3AP1	7
BP	GO:0051209	release of sequestered calcium ion into cytosol	4/85	121/18800	0.00221245	0.0163491	0.0123804	TRPM2/LCK/PTPRC/CCR5	4
BP	GO:0019722	calcium-mediated signaling	5/85	202/18800	0.00222989	0.016407	0.0124242	TRPM2/PTPRC/CCR5/CXCR6/TBC1D10C	5
BP	GO:0051283	negative regulation of sequestering of calcium ion	4/85	122/18800	0.00227966	0.0167012	0.012647	TRPM2/LCK/PTPRC/CCR5	4
BP	GO:0051056	regulation of small GTPase mediated signal transduction	6/85	299/18800	0.00235192	0.017157	0.0129922	ARHGAP15/ARHGAP9/VAV1/PREX1/DOCK2/ARHGAP4	6
BP	GO:0002711	positive regulation of T cell mediated immunity	3/85	59/18800	0.00241584	0.0174178	0.0131897	PTPRC/TBX21/SASH3	3
BP	GO:0002820	negative regulation of adaptive immune response	3/85	59/18800	0.00241584	0.0174178	0.0131897	NCKAP1L/PTPRC/TBX21	3
BP	GO:0051282	regulation of sequestering of calcium ion	4/85	124/18800	0.00241828	0.0174178	0.0131897	TRPM2/LCK/PTPRC/CCR5	4
BP	GO:0043407	negative regulation of MAP kinase activity	3/85	60/18800	0.00253476	0.01818	0.0137668	PTPN22/SORL1/LAX1	3
BP	GO:0002295	T-helper cell lineage commitment	2/85	17/18800	0.00262897	0.0186985	0.0141595	BATF/TBX21	2
BP	GO:0033631	cell-cell adhesion mediated by integrin	2/85	17/18800	0.00262897	0.0186985	0.0141595	ITGA4/CCL5	2
BP	GO:0051208	sequestering of calcium ion	4/85	128/18800	0.00271275	0.019135	0.01449	TRPM2/LCK/PTPRC/CCR5	4
BP	GO:0071621	granulocyte chemotaxis	4/85	128/18800	0.00271275	0.019135	0.01449	NCKAP1L/VAV1/PREX1/CCL5	4
BP	GO:0002712	regulation of B cell mediated immunity	3/85	62/18800	0.00278331	0.0194717	0.014745	CD28/PTPRC/TBX21	3
BP	GO:0002889	regulation of immunoglobulin mediated immune response	3/85	62/18800	0.00278331	0.0194717	0.014745	CD28/PTPRC/TBX21	3
BP	GO:0006909	phagocytosis	6/85	310/18800	0.00281389	0.0196054	0.0148462	MYO1G/NCKAP1L/VAV1/PTPRC/DOCK2/IL2RG	6
BP	GO:0016032	viral process	7/85	418/18800	0.00284426	0.0197364	0.0149454	LAMP3/CD28/GFI1/ITGB7/CCL5/CCR5/CXCR6	7
BP	GO:0032613	interleukin-10 production	3/85	63/18800	0.00291301	0.0200505	0.0151833	CD28/PDCD1LG2/SASH3	3
BP	GO:0032653	regulation of interleukin-10 production	3/85	63/18800	0.00291301	0.0200505	0.0151833	CD28/PDCD1LG2/SASH3	3
BP	GO:0071222	cellular response to lipopolysaccharide	5/85	217/18800	0.00303737	0.0208224	0.0157679	GFI1/PTPN22/PDCD1LG2/CCL5/CCR5	5
BP	GO:0002377	immunoglobulin production	5/85	218/18800	0.0030978	0.0211518	0.0160172	CD28/BATF/PTPRC/TBX21/SASH3	5
BP	GO:0019058	viral life cycle	6/85	317/18800	0.0031414	0.0213145	0.0161405	LAMP3/CD28/ITGB7/CCL5/CCR5/CXCR6	6
BP	GO:0007163	establishment or maintenance of cell polarity	5/85	219/18800	0.00315909	0.0213145	0.0161405	NCKAP1L/PARVG/CRTAM/CD3G/DOCK2	5
BP	GO:0051651	maintenance of location in cell	5/85	219/18800	0.00315909	0.0213145	0.0161405	TRPM2/LCK/SORL1/PTPRC/CCR5	5
BP	GO:0014067	negative regulation of phosphatidylinositol 3-kinase signaling	2/85	19/18800	0.00328621	0.0219983	0.0166583	TWIST1/NLRC3	2
BP	GO:0034162	toll-like receptor 9 signaling pathway	2/85	19/18800	0.00328621	0.0219983	0.0166583	PTPN22/PIK3AP1	2
BP	GO:2000514	regulation of CD4-positive, alpha-beta T cell activation	3/85	66/18800	0.00332426	0.0221661	0.0167853	NCKAP1L/TBX21/SASH3	3
BP	GO:0046637	regulation of alpha-beta T cell differentiation	3/85	67/18800	0.00346883	0.0230401	0.0174472	NCKAP1L/TBX21/SASH3	3
BP	GO:0035455	response to interferon-alpha	2/85	20/18800	0.00364065	0.0239946	0.01817	IFNAR2/LAMP3	2
BP	GO:0043373	CD4-positive, alpha-beta T cell lineage commitment	2/85	20/18800	0.00364065	0.0239946	0.01817	BATF/TBX21	2
BP	GO:0071219	cellular response to molecule of bacterial origin	5/85	229/18800	0.00382112	0.024991	0.0189245	GFI1/PTPN22/PDCD1LG2/CCL5/CCR5	5
BP	GO:0097529	myeloid leukocyte migration	5/85	229/18800	0.00382112	0.024991	0.0189245	SLAMF8/NCKAP1L/VAV1/PREX1/CCL5	5
BP	GO:0045911	positive regulation of DNA recombination	3/85	70/18800	0.00392544	0.0255753	0.019367	CD28/PTPRC/TBX21	3
BP	GO:0032496	response to lipopolysaccharide	6/85	333/18800	0.00399642	0.0259388	0.0196422	CD96/GFI1/PTPN22/PDCD1LG2/CCL5/CCR5	6
BP	GO:0033630	positive regulation of cell adhesion mediated by integrin	2/85	21/18800	0.00401211	0.0259419	0.0196446	NCKAP1L/CCL5	2
BP	GO:0002274	myeloid leukocyte activation	5/85	232/18800	0.00403777	0.0260093	0.0196957	BATF/PREX1/PTPRC/CCL5/DOCK2	5
BP	GO:0002363	alpha-beta T cell lineage commitment	2/85	22/18800	0.00440041	0.028028	0.0212243	BATF/TBX21	2
BP	GO:0035584	calcium-mediated signaling using intracellular calcium source	2/85	22/18800	0.00440041	0.028028	0.0212243	TRPM2/PTPRC	2
BP	GO:0043369	CD4-positive or CD8-positive, alpha-beta T cell lineage commitment	2/85	22/18800	0.00440041	0.028028	0.0212243	BATF/TBX21	2
BP	GO:0006874	cellular calcium ion homeostasis	7/85	456/18800	0.00457983	0.0290624	0.0220076	TRPM2/LCK/PTPRC/CCL5/CCR5/CXCR6/PRKCB	7
BP	GO:0010155	regulation of proton transport	2/85	23/18800	0.0048054	0.0303808	0.023006	TWIST1/TESC	2
BP	GO:0034121	regulation of toll-like receptor signaling pathway	3/85	76/18800	0.00494434	0.0311439	0.0235838	GFI1/PTPN22/SARM1	3
BP	GO:0032720	negative regulation of tumor necrosis factor production	3/85	77/18800	0.00512818	0.0320652	0.0242815	PTPN22/TWIST1/NLRC3	3
BP	GO:0032729	positive regulation of interferon-gamma production	3/85	77/18800	0.00512818	0.0320652	0.0242815	PTPN22/CRTAM/SASH3	3
BP	GO:0097553	calcium ion transmembrane import into cytosol	4/85	154/18800	0.00524487	0.0326752	0.0247434	TRPM2/LCK/PTPRC/CCR5	4
BP	GO:0055074	calcium ion homeostasis	7/85	468/18800	0.00526708	0.0326942	0.0247578	TRPM2/LCK/PTPRC/CCL5/CCR5/CXCR6/PRKCB	7
BP	GO:0002237	response to molecule of bacterial origin	6/85	354/18800	0.00536702	0.0331939	0.0251362	CD96/GFI1/PTPN22/PDCD1LG2/CCL5/CCR5	6
BP	GO:1903556	negative regulation of tumor necrosis factor superfamily cytokine production	3/85	79/18800	0.00550811	0.0339435	0.0257038	PTPN22/TWIST1/NLRC3	3
BP	GO:0001911	negative regulation of leukocyte mediated cytotoxicity	2/85	25/18800	0.00566485	0.0345353	0.026152	NCKAP1L/PTPRC	2
BP	GO:0031579	membrane raft organization	2/85	25/18800	0.00566485	0.0345353	0.026152	PTPRC/DOCK2	2
BP	GO:0032753	positive regulation of interleukin-4 production	2/85	25/18800	0.00566485	0.0345353	0.026152	CD28/SASH3	2
BP	GO:0071216	cellular response to biotic stimulus	5/85	256/18800	0.00609877	0.0370394	0.0280482	GFI1/PTPN22/PDCD1LG2/CCL5/CCR5	5
BP	GO:0002726	positive regulation of T cell cytokine production	2/85	26/18800	0.00611899	0.0370394	0.0280482	TBX21/SASH3	2
BP	GO:0050672	negative regulation of lymphocyte proliferation	3/85	84/18800	0.00653052	0.0393279	0.0297812	INPP5D/PDCD1LG2/CRTAM	3
BP	GO:0002418	immune response to tumor cell	2/85	27/18800	0.00658921	0.0393279	0.0297812	CRTAM/NKG7	2
BP	GO:0002719	negative regulation of cytokine production involved in immune response	2/85	27/18800	0.00658921	0.0393279	0.0297812	CD96/TBX21	2
BP	GO:0010758	regulation of macrophage chemotaxis	2/85	27/18800	0.00658921	0.0393279	0.0297812	SLAMF8/CCL5	2
BP	GO:0032945	negative regulation of mononuclear cell proliferation	3/85	85/18800	0.00674762	0.0401331	0.0303909	INPP5D/PDCD1LG2/CRTAM	3
BP	GO:0018108	peptidyl-tyrosine phosphorylation	6/85	373/18800	0.00687976	0.0407769	0.0308785	HCLS1/LCK/BANK1/ITK/PTPRC/CCL5	6
BP	GO:0072503	cellular divalent inorganic cation homeostasis	7/85	494/18800	0.00702012	0.0410804	0.0311083	TRPM2/LCK/PTPRC/CCL5/CCR5/CXCR6/PRKCB	7
BP	GO:0002360	T cell lineage commitment	2/85	28/18800	0.00707536	0.0410804	0.0311083	BATF/TBX21	2
BP	GO:0031342	negative regulation of cell killing	2/85	28/18800	0.00707536	0.0410804	0.0311083	NCKAP1L/PTPRC	2
BP	GO:0032703	negative regulation of interleukin-2 production	2/85	28/18800	0.00707536	0.0410804	0.0311083	PTPRC/TBX21	2
BP	GO:0072539	T-helper 17 cell differentiation	2/85	28/18800	0.00707536	0.0410804	0.0311083	BATF/TBX21	2
BP	GO:0090025	regulation of monocyte chemotaxis	2/85	28/18800	0.00707536	0.0410804	0.0311083	SLAMF8/CCL5	2
BP	GO:0018212	peptidyl-tyrosine modification	6/85	376/18800	0.00714428	0.0413399	0.0313048	HCLS1/LCK/BANK1/ITK/PTPRC/CCL5	6
BP	GO:0031348	negative regulation of defense response	5/85	268/18800	0.00736705	0.042485	0.0321719	CD96/SLAMF8/PTPRC/NLRC5/NLRC3	5
BP	GO:0060402	calcium ion transport into cytosol	4/85	171/18800	0.00755603	0.0434041	0.0328679	TRPM2/LCK/PTPRC/CCR5	4
BP	GO:0001773	myeloid dendritic cell activation	2/85	29/18800	0.00757729	0.0434041	0.0328679	BATF/DOCK2	2
BP	GO:0070098	chemokine-mediated signaling pathway	3/85	89/18800	0.00765881	0.0437244	0.0331104	CCL5/CCR5/CXCR6	3
BP	GO:0043547	positive regulation of GTPase activity	5/85	272/18800	0.00782791	0.0445408	0.0337287	VAV1/PREX1/CCL5/TBC1D2B/TBC1D10C	5
BP	GO:0070664	negative regulation of leukocyte proliferation	3/85	91/18800	0.00814034	0.0461646	0.0349583	INPP5D/PDCD1LG2/CRTAM	3
BP	GO:0001782	B cell homeostasis	2/85	31/18800	0.00862787	0.0486065	0.0368075	NCKAP1L/TNFSF13B	2
BP	GO:2000406	positive regulation of T cell migration	2/85	31/18800	0.00862787	0.0486065	0.0368075	ITGA4/CCL5	2
BP	GO:0045582	positive regulation of T cell differentiation	3/85	94/18800	0.00889545	0.0499491	0.0378241	NCKAP1L/PTPRC/SASH3	3
CC	GO:0009897	external side of plasma membrane	11/86	455/19594	4.79089e-06	0.00059407	0.000509347	CD28/ITGA4/SLAMF7/PDCD1LG2/CD3G/CD3D/PTPRC/CCR5/CXCR6/IL21R/IL2RG	11
CC	GO:0001772	immunological synapse	4/86	44/19594	4.10678e-05	0.0025462	0.00218308	LCK/CD28/CD53/CRTAM	4
CC	GO:0070820	tertiary granule	5/86	164/19594	0.000779434	0.0253124	0.0217025	TRPM2/CD53/CTSS/NCKAP1L/TBC1D10C	5
CC	GO:0098636	protein complex involved in cell adhesion	3/86	43/19594	0.000887454	0.0253124	0.0217025	CD28/ITGA4/ITGB7	3
CC	GO:0042105	alpha-beta T cell receptor complex	2/86	11/19594	0.00102066	0.0253124	0.0217025	CD3G/CD3D	2
CC	GO:0101003	ficolin-1-rich granule membrane	3/86	61/19594	0.00244518	0.0445193	0.0381702	TRPM2/NCKAP1L/TBC1D10C	3
CC	GO:0030667	secretory granule membrane	6/86	312/19594	0.00251319	0.0445193	0.0381702	LAMP3/TRPM2/CD53/NCKAP1L/PTPRC/TBC1D10C	6
MF	GO:0042608	T cell receptor binding	3/83	10/18410	1.03645e-05	0.00215581	0.00177833	LCK/CD3G/DOCK2	3
MF	GO:0005096	GTPase activator activity	8/83	274/18410	3.26683e-05	0.0033975	0.0028026	ARHGAP15/NCKAP1L/ARHGAP9/PREX1/DOCK2/TBC1D2B/TBC1D10C/ARHGAP4	8
MF	GO:0015026	coreceptor activity	4/83	47/18410	5.91025e-05	0.00399277	0.00329363	CD28/ITGA4/CCR5/CXCR6	4
MF	GO:0004896	cytokine receptor activity	5/83	97/18410	7.6784e-05	0.00399277	0.00329363	IFNAR2/CCR5/CXCR6/IL21R/IL2RG	5
MF	GO:0003953	NAD+ nucleosidase activity	3/83	28/18410	0.000266843	0.00901363	0.00743533	BANK1/SARM1/PIK3AP1	3
MF	GO:0043548	phosphatidylinositol 3-kinase binding	3/83	29/18410	0.000296667	0.00901363	0.00743533	LCK/NLRC3/PIK3AP1	3
MF	GO:0030695	GTPase regulator activity	9/83	488/18410	0.000346678	0.00901363	0.00743533	ARHGAP15/NCKAP1L/ARHGAP9/VAV1/PREX1/DOCK2/TBC1D2B/TBC1D10C/ARHGAP4	9
MF	GO:0060589	nucleoside-triphosphatase regulator activity	9/83	488/18410	0.000346678	0.00901363	0.00743533	ARHGAP15/NCKAP1L/ARHGAP9/VAV1/PREX1/DOCK2/TBC1D2B/TBC1D10C/ARHGAP4	9
MF	GO:0019956	chemokine binding	3/83	33/18410	0.000437251	0.0101054	0.0083359	ITGA4/CCR5/CXCR6	3
MF	GO:0140375	immune receptor activity	5/83	148/18410	0.000550489	0.0114502	0.00944524	IFNAR2/CCR5/CXCR6/IL21R/IL2RG	5
MF	GO:0036312	phosphatidylinositol 3-kinase regulatory subunit binding	2/83	10/18410	0.000882724	0.0166915	0.0137688	NLRC3/PIK3AP1	2
MF	GO:0016799	hydrolase activity, hydrolyzing N-glycosyl compounds	3/83	50/18410	0.00148652	0.0257664	0.0212547	BANK1/SARM1/PIK3AP1	3
MF	GO:0016004	phospholipase activator activity	2/83	14/18410	0.00176428	0.0282284	0.0232856	LCK/CCL5	2
MF	GO:0060229	lipase activator activity	2/83	16/18410	0.00231294	0.0341295	0.0281534	LCK/CCL5	2
MF	GO:0017124	SH3 domain binding	4/83	125/18410	0.00246126	0.0341295	0.0281534	HCLS1/INPP5D/PTPN22/SH2D2A	4
MF	GO:0019955	cytokine binding	4/83	141/18410	0.00379517	0.0493373	0.0406983	ITGA4/CCR5/CXCR6/IL2RG	4

## Sheet: GO_magenta
ONTOLOGY	ID	Description	GeneRatio	BgRatio	pvalue	p.adjust	qvalue	geneID	Count
BP	GO:0070972	protein localization to endoplasmic reticulum	9/98	77/18800	2.35293e-10	4.9035e-07	4.36901e-07	SEC62/SRP72/SEC61B/SEC63/TRAM1/GPAA1/RER1/SEC61A1/BCAP31	9
BP	GO:0006613	cotranslational protein targeting to membrane	6/98	31/18800	1.13872e-08	1.18655e-05	1.05721e-05	SEC62/SRP72/SEC61B/SEC63/TRAM1/SEC61A1	6
BP	GO:0045047	protein targeting to ER	6/98	45/18800	1.18778e-07	8.25114e-05	7.35176e-05	SEC62/SRP72/SEC61B/SEC63/TRAM1/SEC61A1	6
BP	GO:0006614	SRP-dependent cotranslational protein targeting to membrane	5/98	25/18800	1.69839e-07	8.35805e-05	7.44702e-05	SRP72/SEC61B/SEC63/TRAM1/SEC61A1	5
BP	GO:0072599	establishment of protein localization to endoplasmic reticulum	6/98	49/18800	2.00529e-07	8.35805e-05	7.44702e-05	SEC62/SRP72/SEC61B/SEC63/TRAM1/SEC61A1	6
BP	GO:0006620	post-translational protein targeting to endoplasmic reticulum membrane	4/98	15/18800	9.06761e-07	0.000314948	0.000280619	SEC62/SEC61B/SEC63/SEC61A1	4
BP	GO:0006612	protein targeting to membrane	7/98	132/18800	5.83354e-06	0.00173673	0.00154742	SEC62/SRP72/SEC61B/STOM/SEC63/TRAM1/SEC61A1	7
BP	GO:0065002	intracellular protein transmembrane transport	5/98	52/18800	7.43303e-06	0.0019363	0.00172525	SEC62/SEC61B/SEC63/TRAM1/SEC61A1	5
BP	GO:0032731	positive regulation of interleukin-1 beta production	5/98	62/18800	1.77608e-05	0.00400393	0.0035675	CD36/LPL/NLRP12/WNT5A/PANX1	5
BP	GO:0071806	protein transmembrane transport	5/98	63/18800	1.92127e-05	0.00400393	0.0035675	SEC62/SEC61B/SEC63/TRAM1/SEC61A1	5
BP	GO:0032732	positive regulation of interleukin-1 production	5/98	73/18800	3.94027e-05	0.00746502	0.00665132	CD36/LPL/NLRP12/WNT5A/PANX1	5
BP	GO:0090150	establishment of protein localization to membrane	8/98	259/18800	6.29206e-05	0.0109272	0.00973613	SEC62/SRP72/SEC61B/STOM/SEC63/CD24/TRAM1/SEC61A1	8
BP	GO:0010876	lipid localization	10/98	446/18800	0.000111046	0.01653	0.0147283	CD36/LPL/SURF4/OSBPL2/FITM2/DGAT1/STARD10/OSBPL10/ABCA3/ARV1	10
BP	GO:1903829	positive regulation of protein localization	10/98	446/18800	0.000111046	0.01653	0.0147283	PARP9/DTX3L/SERP1/MPC2/SMO/AGR2/STOM/RER1/WNT5A/BCAP31	10
BP	GO:1905952	regulation of lipid localization	6/98	155/18800	0.00016068	0.0223238	0.0198905	CD36/LPL/SURF4/FITM2/ABCA3/ARV1	6
BP	GO:0018279	protein N-linked glycosylation via asparagine	3/98	23/18800	0.000225509	0.028742	0.0256091	DAD1/ALG5/RPN1	3
BP	GO:0006605	protein targeting	8/98	317/18800	0.000252657	0.028742	0.0256091	SEC62/SRP72/SEC61B/STOM/SEC63/TRAM1/SEC61A1/BCAP31	8
BP	GO:0018196	peptidyl-asparagine modification	3/98	24/18800	0.000256752	0.028742	0.0256091	DAD1/ALG5/RPN1	3
BP	GO:0032611	interleukin-1 beta production	5/98	110/18800	0.000275834	0.028742	0.0256091	CD36/LPL/NLRP12/WNT5A/PANX1	5
BP	GO:0032651	regulation of interleukin-1 beta production	5/98	110/18800	0.000275834	0.028742	0.0256091	CD36/LPL/NLRP12/WNT5A/PANX1	5
BP	GO:0055088	lipid homeostasis	6/98	173/18800	0.00029114	0.0288922	0.0257429	LPL/CD24/SURF4/FITM2/DGAT1/ABCA3	6
BP	GO:0010884	positive regulation of lipid storage	3/98	27/18800	0.000366863	0.034752	0.030964	CD36/LPL/FITM2	3
BP	GO:0072594	establishment of protein localization to organelle	9/98	431/18800	0.000418064	0.0378803	0.0337513	SEC62/SMO/CD36/SRP72/SEC61B/SEC63/TRAM1/SEC61A1/BCAP31	9
BP	GO:0061180	mammary gland epithelium development	4/98	68/18800	0.000437874	0.0380221	0.0338776	SMO/ORAI1/WNT5A/MGMT	4
BP	GO:0032612	interleukin-1 production	5/98	129/18800	0.000573873	0.0459981	0.0409843	CD36/LPL/NLRP12/WNT5A/PANX1	5
BP	GO:0032652	regulation of interleukin-1 production	5/98	129/18800	0.000573873	0.0459981	0.0409843	CD36/LPL/NLRP12/WNT5A/PANX1	5
CC	GO:0031301	integral component of organelle membrane	11/104	382/19594	5.90357e-06	0.00139324	0.001218	SEC62/MPC2/PLPP6/FITM2/TRAM1/GPAA1/RER1/SEC61A1/YIF1A/BCAP31/SLC35A2	11
CC	GO:0031300	intrinsic component of organelle membrane	11/104	412/19594	1.20176e-05	0.00141808	0.00123971	SEC62/MPC2/PLPP6/FITM2/TRAM1/GPAA1/RER1/SEC61A1/YIF1A/BCAP31/SLC35A2	11
CC	GO:0030176	integral component of endoplasmic reticulum membrane	7/104	164/19594	2.72209e-05	0.00214138	0.00187203	SEC62/PLPP6/FITM2/TRAM1/GPAA1/SEC61A1/BCAP31	7
CC	GO:0031227	intrinsic component of endoplasmic reticulum membrane	7/104	172/19594	3.6926e-05	0.00217864	0.00190461	SEC62/PLPP6/FITM2/TRAM1/GPAA1/SEC61A1/BCAP31	7
CC	GO:0140534	endoplasmic reticulum protein-containing complex	6/104	125/19594	5.44237e-05	0.00238286	0.00208314	SEC61B/SEC63/DAD1/GPAA1/RPN1/SEC61A1	6
CC	GO:0005791	rough endoplasmic reticulum	5/104	79/19594	6.31054e-05	0.00238286	0.00208314	SEC62/SEC61B/SEC63/RPN1/SEC61A1	5
CC	GO:0005793	endoplasmic reticulum-Golgi intermediate compartment	6/104	131/19594	7.0678e-05	0.00238286	0.00208314	TMED9/MYDGF/SURF4/RER1/YIF1A/BCAP31	6
CC	GO:0035579	specific granule membrane	5/104	91/19594	0.000123824	0.0036528	0.00319335	TMBIM1/CD36/STOM/DGAT1/CMTM6	5
CC	GO:0030667	secretory granule membrane	8/104	312/19594	0.000258961	0.00639788	0.00559315	TMBIM1/CD36/STOM/SURF4/DGAT1/RND2/CMTM6/ABCA3	8
CC	GO:0030867	rough endoplasmic reticulum membrane	3/104	24/19594	0.000271097	0.00639788	0.00559315	SEC61B/SEC63/SEC61A1	3
CC	GO:0005774	vacuolar membrane	9/104	449/19594	0.000646317	0.0138664	0.0121223	DTX3L/TMBIM1/TSPAN1/STOM/SURF4/AP2S1/WIPI1/CMTM6/ABCA3	9
CC	GO:0033116	endoplasmic reticulum-Golgi intermediate compartment membrane	4/104	77/19594	0.000752847	0.014806	0.0129437	TMED9/SURF4/YIF1A/BCAP31	4
CC	GO:0005765	lysosomal membrane	8/104	404/19594	0.00140187	0.0236315	0.0206591	DTX3L/TMBIM1/TSPAN1/STOM/SURF4/AP2S1/CMTM6/ABCA3	8
CC	GO:0098852	lytic vacuole membrane	8/104	404/19594	0.00140187	0.0236315	0.0206591	DTX3L/TMBIM1/TSPAN1/STOM/SURF4/AP2S1/CMTM6/ABCA3	8
CC	GO:0042581	specific granule	5/104	160/19594	0.00163738	0.0250342	0.0218854	TMBIM1/CD36/STOM/DGAT1/CMTM6	5
CC	GO:0045121	membrane raft	7/104	326/19594	0.0017723	0.0250342	0.0218854	SMO/CD36/STOM/CD24/PROM2/NPHS2/ORAI1	7
CC	GO:0098857	membrane microdomain	7/104	327/19594	0.00180331	0.0250342	0.0218854	SMO/CD36/STOM/CD24/PROM2/NPHS2/ORAI1	7
CC	GO:0036038	MKS complex	2/104	13/19594	0.00209491	0.0274665	0.0240118	TCTN2/B9D2	2
CC	GO:0008250	oligosaccharyltransferase complex	2/104	14/19594	0.00243561	0.0302529	0.0264476	DAD1/RPN1	2
CC	GO:0042470	melanosome	4/104	109/19594	0.00271938	0.0305606	0.0267167	SND1/STOM/ERP29/RPN1	4
CC	GO:0048770	pigment granule	4/104	109/19594	0.00271938	0.0305606	0.0267167	SND1/STOM/ERP29/RPN1	4
CC	GO:0030136	clathrin-coated vesicle	5/104	192/19594	0.00360489	0.0372146	0.0325337	TMED9/AP2S1/WIPI1/WNT5A/BCAP31	5
CC	GO:0035577	azurophil granule membrane	3/104	58/19594	0.00362684	0.0372146	0.0325337	STOM/SURF4/CMTM6	3
CC	GO:0030173	integral component of Golgi membrane	3/104	62/19594	0.00437791	0.0426035	0.0372448	RER1/YIF1A/SLC35A2	3
CC	GO:0030135	coated vesicle	6/104	290/19594	0.00451308	0.0426035	0.0372448	TMED9/AP2S1/WIPI1/WNT5A/YIF1A/BCAP31	6
CC	GO:0031228	intrinsic component of Golgi membrane	3/104	67/19594	0.00544039	0.049382	0.0431707	RER1/YIF1A/SLC35A2	3

## Sheet: GO_pink
ONTOLOGY	ID	Description	GeneRatio	BgRatio	pvalue	p.adjust	qvalue	geneID	Count
BP	GO:0044539	long-chain fatty acid import into cell	3/100	17/18800	9.40636e-05	0.0404676	0.0378086	FABP3/CD36/AKT1	3
BP	GO:1990090	cellular response to nerve growth factor stimulus	4/100	45/18800	9.49722e-05	0.0404676	0.0378086	CRK/CIB1/AKT1/EEF2K	4
BP	GO:0140354	lipid import into cell	3/100	18/18800	0.000112441	0.0404676	0.0378086	FABP3/CD36/AKT1	3
BP	GO:1990089	response to nerve growth factor	4/100	47/18800	0.000112771	0.0404676	0.0378086	CRK/CIB1/AKT1/EEF2K	4
BP	GO:0002181	cytoplasmic translation	6/100	146/18800	0.000129498	0.0404676	0.0378086	EIF4A2/RPS6/RPL6/PAIP1/RPSA/RPL10	6
BP	GO:0022613	ribonucleoprotein complex biogenesis	10/100	448/18800	0.000136484	0.0404676	0.0378086	YBEY/EMG1/RPS6/SNRPB/SNRPE/PES1/RPL6/NLE1/RPSA/RPL10	10

## Sheet: GO_tan
ONTOLOGY	ID	Description	GeneRatio	BgRatio	pvalue	p.adjust	qvalue	geneID	Count
CC	GO:0032587	ruffle membrane	4/68	97/19594	0.000360581	0.0405836	0.0364199	EPS8/TPM1/NME1/FAM107A	4
CC	GO:0001726	ruffle	5/68	177/19594	0.000374042	0.0405836	0.0364199	EPS8/TPM1/NME1/FAM107A/CTTN	5

## Sheet: GO_red
ONTOLOGY	ID	Description	GeneRatio	BgRatio	pvalue	p.adjust	qvalue	geneID	Count
BP	GO:0030198	extracellular matrix organization	16/152	307/18800	4.02048e-09	3.97726e-06	3.4637e-06	ADAMTS4/TNFRSF1A/FBLN1/PDGFRA/LOX/RECK/COL12A1/NID2/COL14A1/MMP16/LAMC1/MFAP4/P3H4/FKBP10/CRTAP/ADAMTS15	16
BP	GO:0043062	extracellular structure organization	16/152	308/18800	4.21168e-09	3.97726e-06	3.4637e-06	ADAMTS4/TNFRSF1A/FBLN1/PDGFRA/LOX/RECK/COL12A1/NID2/COL14A1/MMP16/LAMC1/MFAP4/P3H4/FKBP10/CRTAP/ADAMTS15	16
BP	GO:0045229	external encapsulating structure organization	16/152	310/18800	4.61935e-09	3.97726e-06	3.4637e-06	ADAMTS4/TNFRSF1A/FBLN1/PDGFRA/LOX/RECK/COL12A1/NID2/COL14A1/MMP16/LAMC1/MFAP4/P3H4/FKBP10/CRTAP/ADAMTS15	16
BP	GO:1904888	cranial skeletal system development	8/152	70/18800	9.37482e-08	6.05379e-05	5.2721e-05	TBX15/PDGFRA/MTHFD1L/TGFB3/MMP16/PRRX1/EDNRA/RAB23	8
BP	GO:0001667	ameboidal-type cell migration	17/152	480/18800	3.61293e-07	0.000186644	0.000162544	FN1/DCN/KIT/ANXA1/GLIPR2/KLF4/AKAP12/FGF7/CORO1C/EDNRA/SERPINF1/SEMA5A/CLEC14A/EMP2/ADGRA2/TIMP1/SRPX2	17
BP	GO:0048701	embryonic cranial skeleton morphogenesis	6/152	46/18800	1.81479e-06	0.000781267	0.000680387	TBX15/PDGFRA/MTHFD1L/TGFB3/MMP16/PRRX1	6
BP	GO:1905049	negative regulation of metallopeptidase activity	4/152	14/18800	3.86032e-06	0.00142446	0.00124053	TIMP3/RECK/TIMP2/TIMP1	4
BP	GO:0010631	epithelial cell migration	13/152	358/18800	7.05087e-06	0.00221329	0.0019275	DCN/KIT/ANXA1/GLIPR2/KLF4/FGF7/CORO1C/SERPINF1/SEMA5A/CLEC14A/EMP2/ADGRA2/SRPX2	13
BP	GO:0090132	epithelium migration	13/152	361/18800	7.71182e-06	0.00221329	0.0019275	DCN/KIT/ANXA1/GLIPR2/KLF4/FGF7/CORO1C/SERPINF1/SEMA5A/CLEC14A/EMP2/ADGRA2/SRPX2	13
BP	GO:0090130	tissue migration	13/152	366/18800	8.93554e-06	0.00230805	0.00201003	DCN/KIT/ANXA1/GLIPR2/KLF4/FGF7/CORO1C/SERPINF1/SEMA5A/CLEC14A/EMP2/ADGRA2/SRPX2	13
BP	GO:0030199	collagen fibril organization	6/152	62/18800	1.07084e-05	0.00236821	0.00206242	LOX/COL12A1/COL14A1/P3H4/FKBP10/CRTAP	6
BP	GO:0010975	regulation of neuron projection development	14/152	431/18800	1.10021e-05	0.00236821	0.00206242	FN1/FZD1/DPYSL3/KLF4/FYN/VIM/TSKU/DENND5A/PRRX1/SERPINF1/SEMA5A/PTPN9/MYLIP/SFRP1	14
BP	GO:0032963	collagen metabolic process	7/152	101/18800	1.79155e-05	0.00355968	0.00310004	TGFB3/LARP6/VIM/MMP16/RCN3/MFAP4/P3H4	7
BP	GO:0010632	regulation of epithelial cell migration	11/152	290/18800	2.45983e-05	0.0045384	0.00395238	DCN/ANXA1/GLIPR2/KLF4/FGF7/CORO1C/SERPINF1/SEMA5A/EMP2/ADGRA2/SRPX2	11
BP	GO:0032964	collagen biosynthetic process	5/152	47/18800	3.77305e-05	0.0064972	0.00565826	TGFB3/LARP6/VIM/RCN3/P3H4	5
BP	GO:1905048	regulation of metallopeptidase activity	4/152	25/18800	4.5519e-05	0.00734847	0.00639961	TIMP3/RECK/TIMP2/TIMP1	4
BP	GO:0048706	embryonic skeletal system development	7/152	127/18800	7.81465e-05	0.0118737	0.0103405	TBX15/PDGFRA/MTHFD1L/TGFB3/MMP16/PRRX1/EDNRA	7
BP	GO:0048705	skeletal system morphogenesis	9/152	228/18800	0.000101327	0.0141067	0.0122852	TBX15/PDGFRA/MTHFD1L/TGFB3/MMP16/TSKU/PRRX1/RAB23/SFRP1	9
BP	GO:0034599	cellular response to oxidative stress	10/152	284/18800	0.000107591	0.0141067	0.0122852	SLC25A24/AQP1/FZD1/PDGFRA/ANXA1/FYN/SRXN1/STX2/EDNRA/PDE8A	10
BP	GO:0048704	embryonic skeletal system morphogenesis	6/152	94/18800	0.000114707	0.0141067	0.0122852	TBX15/PDGFRA/MTHFD1L/TGFB3/MMP16/PRRX1	6
BP	GO:0045765	regulation of angiogenesis	11/152	345/18800	0.00011736	0.0141067	0.0122852	AQP1/DCN/RECK/KLF4/THBS2/PKM/SERPINF1/SEMA5A/EMP2/SFRP1/ADGRA2	11
BP	GO:0010977	negative regulation of neuron projection development	7/152	136/18800	0.00012015	0.0141067	0.0122852	DPYSL3/VIM/TSKU/DENND5A/SEMA5A/PTPN9/MYLIP	7
BP	GO:1901342	regulation of vasculature development	11/152	351/18800	0.000136511	0.0148168	0.0129036	AQP1/DCN/RECK/KLF4/THBS2/PKM/SERPINF1/SEMA5A/EMP2/SFRP1/ADGRA2	11
BP	GO:0002040	sprouting angiogenesis	8/152	186/18800	0.000137671	0.0148168	0.0129036	ANXA1/RECK/KLF4/PKM/SEMA5A/CLEC14A/ADGRA2/SRPX2	8
BP	GO:0031345	negative regulation of cell projection organization	8/152	188/18800	0.000148194	0.0153114	0.0133343	DPYSL3/FYN/VIM/TSKU/DENND5A/SEMA5A/PTPN9/MYLIP	8
BP	GO:0031589	cell-substrate adhesion	11/152	364/18800	0.000187304	0.0186079	0.0162052	FN1/EPDR1/FBLN1/BST1/EDIL3/NID2/LYVE1/LAMC1/CORO1C/EMP2/SFRP1	11
BP	GO:0008360	regulation of cell shape	7/152	151/18800	0.000229595	0.0218367	0.0190171	FN1/KIT/ANXA1/FYN/RHOQ/HEXB/ATP10A	7
BP	GO:0060070	canonical Wnt signaling pathway	10/152	313/18800	0.000236712	0.0218367	0.0190171	FZD1/RECK/KLF4/DKK3/EDNRA/PLEKHA4/SEMA5A/SFRP1/ADGRA2/BICC1	10
BP	GO:2001044	regulation of integrin-mediated signaling pathway	3/152	16/18800	0.000268598	0.023338	0.0203246	BST1/EMP2/TIMP1	3
BP	GO:0002691	regulation of cellular extravasation	4/152	39/18800	0.000271057	0.023338	0.0203246	BST1/LYVE1/SELP/CD99	4
BP	GO:0048863	stem cell differentiation	8/152	211/18800	0.000324666	0.027052	0.023559	FN1/FZD1/PDGFRA/KIT/CORO1C/EDNRA/SEMA5A/SFRP1	8
BP	GO:0052547	regulation of peptidase activity	12/152	456/18800	0.000341089	0.0275323	0.0239772	FN1/AQP1/TFPI2/TIMP3/FBLN1/RECK/KLF4/FYN/RCN3/SERPINF1/TIMP2/TIMP1	12
BP	GO:0062197	cellular response to chemical stress	10/152	332/18800	0.000377824	0.0284581	0.0247835	SLC25A24/AQP1/FZD1/PDGFRA/ANXA1/FYN/SRXN1/STX2/EDNRA/PDE8A	10
BP	GO:0040013	negative regulation of locomotion	11/152	396/18800	0.000384531	0.0284581	0.0247835	IGFBP3/DCN/FBLN1/DPYSL3/RECK/KLF4/CORO1C/SERPINF1/SEMA5A/SFRP1/TIMP1	11
BP	GO:0097094	craniofacial suture morphogenesis	3/152	18/18800	0.000386769	0.0284581	0.0247835	TGFB3/MMP16/RAB23	3
BP	GO:0010712	regulation of collagen metabolic process	4/152	43/18800	0.000396629	0.0284581	0.0247835	TGFB3/LARP6/VIM/MFAP4	4
BP	GO:0030203	glycosaminoglycan metabolic process	6/152	120/18800	0.000433332	0.0300362	0.0261578	DCN/UGDH/LYVE1/EDNRA/HEXB/CSGALNACT2	6
BP	GO:0014068	positive regulation of phosphatidylinositol 3-kinase signaling	5/152	79/18800	0.000450509	0.0300362	0.0261578	FN1/DCN/PDGFRA/KIT/SELP	5
BP	GO:0043542	endothelial cell migration	9/152	279/18800	0.000453508	0.0300362	0.0261578	DCN/ANXA1/KLF4/SERPINF1/SEMA5A/CLEC14A/EMP2/ADGRA2/SRPX2	9
BP	GO:0031346	positive regulation of cell projection organization	10/152	341/18800	0.000465886	0.0300846	0.0261999	FN1/FZD1/KIT/DPYSL3/FYN/TGFB3/RHOQ/CORO1C/SERPINF1/SEMA5A	10
BP	GO:0010594	regulation of endothelial cell migration	8/152	230/18800	0.000575554	0.0362599	0.0315779	DCN/ANXA1/KLF4/SERPINF1/SEMA5A/EMP2/ADGRA2/SRPX2	8
BP	GO:0001503	ossification	11/152	420/18800	0.000627949	0.0380364	0.033125	TWIST2/FZD1/SBNO2/FSTL3/LOX/ENPP1/TGFB3/MMP16/CDH11/CLEC3B/SFRP1	11
BP	GO:0030850	prostate gland development	4/152	49/18800	0.000655852	0.0380364	0.033125	ANXA1/SERPINF1/SFRP1/CRIP1	4
BP	GO:1901652	response to peptide	12/152	491/18800	0.000657794	0.0380364	0.033125	RARRES2/ANXA1/FYN/ENPP1/PKM/RHOQ/VIM/EDNRA/SERPINF1/RAB12/LEPROTL1/TIMP1	12
BP	GO:0007160	cell-matrix adhesion	8/152	235/18800	0.000662654	0.0380364	0.033125	FN1/EPDR1/BST1/NID2/LYVE1/CORO1C/EMP2/SFRP1	8
BP	GO:0006022	aminoglycan metabolic process	6/152	131/18800	0.000689516	0.0387178	0.0337185	DCN/UGDH/LYVE1/EDNRA/HEXB/CSGALNACT2	6
BP	GO:2000146	negative regulation of cell motility	10/152	361/18800	0.000723793	0.0397778	0.0346416	IGFBP3/DCN/FBLN1/DPYSL3/RECK/KLF4/CORO1C/SERPINF1/SFRP1/TIMP1	10
BP	GO:0042060	wound healing	11/152	429/18800	0.000747453	0.0402223	0.0350287	FN1/TFPI2/FBLN1/PDGFRA/LOX/ANXA1/TGFB3/TSKU/SELP/FKBP10/TIMP1	11
BP	GO:0090101	negative regulation of transmembrane receptor protein serine/threonine kinase signaling pathway	6/152	135/18800	0.000807209	0.0417575	0.0363657	FZD1/RASL11B/FSTL3/TGFB3/CILP/SFRP1	6
BP	GO:0007178	transmembrane receptor protein serine/threonine kinase signaling pathway	10/152	368/18800	0.00083807	0.0417575	0.0363657	FZD1/RASL11B/FSTL3/LOX/TGFB3/CILP/VIM/DKK3/TMEM100/SFRP1	10
BP	GO:0048762	mesenchymal cell differentiation	8/152	244/18800	0.000846099	0.0417575	0.0363657	FN1/GLIPR2/TGFB3/CORO1C/EDNRA/TMEM100/SEMA5A/SFRP1	8
BP	GO:0051271	negative regulation of cellular component movement	10/152	369/18800	0.000855545	0.0417575	0.0363657	IGFBP3/DCN/FBLN1/DPYSL3/RECK/KLF4/CORO1C/SERPINF1/SFRP1/TIMP1	10
BP	GO:0022604	regulation of cell morphogenesis	9/152	305/18800	0.000856814	0.0417575	0.0363657	FN1/FBLN1/KIT/ANXA1/FYN/RHOQ/CORO1C/HEXB/ATP10A	9
BP	GO:1901654	response to ketone	7/152	190/18800	0.000909439	0.0434804	0.0378661	AQP1/MTAP/TGFB3/ADCY3/SERPINF1/SLIT3/SFRP1	7
BP	GO:0051043	regulation of membrane protein ectodomain proteolysis	3/152	24/18800	0.000925832	0.0434804	0.0378661	TIMP3/TIMP2/TIMP1	3
BP	GO:0070372	regulation of ERK1 and ERK2 cascade	9/152	311/18800	0.000982479	0.0444913	0.0387464	FN1/ACKR3/TIMP3/FBLN1/PDGFRA/GLIPR2/AKAP12/TNFAIP8L3/PDE8A	9
BP	GO:0010951	negative regulation of endopeptidase activity	8/152	251/18800	0.0010153	0.0444913	0.0387464	AQP1/TFPI2/TIMP3/RECK/KLF4/SERPINF1/TIMP2/TIMP1	8
BP	GO:0071560	cellular response to transforming growth factor beta stimulus	8/152	252/18800	0.00104154	0.0444913	0.0387464	RASL11B/LOX/FYN/TGFB3/CILP/DKK3/CLEC3B/SFRP1	8
BP	GO:0014033	neural crest cell differentiation	5/152	95/18800	0.00104451	0.0444913	0.0387464	FN1/CORO1C/EDNRA/SEMA5A/SFRP1	5
BP	GO:0032967	positive regulation of collagen biosynthetic process	3/152	25/18800	0.00104587	0.0444913	0.0387464	TGFB3/LARP6/VIM	3
BP	GO:0090287	regulation of cellular response to growth factor stimulus	9/152	314/18800	0.0010507	0.0444913	0.0387464	FZD1/DCN/RASL11B/FSTL3/LOX/TGFB3/DKK3/SFRP1/ADGRA2	9
BP	GO:0016055	Wnt signaling pathway	11/152	452/18800	0.00114128	0.0469864	0.0409194	FZD1/RECK/KLF4/TSKU/DKK3/EDNRA/PLEKHA4/SEMA5A/SFRP1/ADGRA2/BICC1	11
BP	GO:0007566	embryo implantation	4/152	57/18800	0.00116312	0.0469864	0.0409194	FBLN1/RECK/EMP2/TIMP1	4
BP	GO:0010714	positive regulation of collagen metabolic process	3/152	26/18800	0.00117532	0.0469864	0.0409194	TGFB3/LARP6/VIM	3
BP	GO:0198738	cell-cell signaling by wnt	11/152	454/18800	0.00118239	0.0469864	0.0409194	FZD1/RECK/KLF4/TSKU/DKK3/EDNRA/PLEKHA4/SEMA5A/SFRP1/ADGRA2/BICC1	11
BP	GO:0071559	response to transforming growth factor beta	8/152	258/18800	0.0012106	0.0473784	0.0412607	RASL11B/LOX/FYN/TGFB3/CILP/DKK3/CLEC3B/SFRP1	8
BP	GO:0060828	regulation of canonical Wnt signaling pathway	8/152	261/18800	0.00130297	0.0492607	0.0428999	FZD1/RECK/DKK3/PLEKHA4/SEMA5A/SFRP1/ADGRA2/BICC1	8
BP	GO:0018126	protein hydroxylation	3/152	27/18800	0.00131444	0.0492607	0.0428999	P3H4/FKBP10/CRTAP	3
BP	GO:0001755	neural crest cell migration	4/152	59/18800	0.00132351	0.0492607	0.0428999	FN1/CORO1C/EDNRA/SEMA5A	4
BP	GO:0010466	negative regulation of peptidase activity	8/152	262/18800	0.00133498	0.0492607	0.0428999	AQP1/TFPI2/TIMP3/RECK/KLF4/SERPINF1/TIMP2/TIMP1	8
CC	GO:0062023	collagen-containing extracellular matrix	31/161	429/19594	1.27934e-20	2.86572e-18	2.69335e-18	FN1/ADAMTS4/RARRES2/DCN/TIMP3/MFAP5/LGALS1/FBLN1/EDIL3/LOX/ANXA1/COL12A1/THBS2/TGFB3/NID2/PKM/CILP/COL14A1/SPON1/ANGPTL1/LAMC1/SERPINF1/MFAP4/TIMP2/MXRA7/CLEC14A/CLEC3B/SFRP1/ADAMTS15/TIMP1/SRPX2	31
CC	GO:0005788	endoplasmic reticulum lumen	15/161	311/19594	4.49192e-08	5.03095e-06	4.72834e-06	FN1/FKBP7/IGFBP3/LGALS1/TSPAN5/FSTL3/COL12A1/COL14A1/RCN1/SPON1/LAMC1/RCN3/FKBP10/CRTAP/TIMP1	15
CC	GO:0005604	basement membrane	8/161	95/19594	1.15746e-06	8.64236e-05	8.12252e-05	FN1/TIMP3/FBLN1/THBS2/NID2/LAMC1/SERPINF1/TIMP1	8
CC	GO:0042827	platelet dense granule	4/161	21/19594	2.3567e-05	0.00131975	0.00124037	RARRES2/TIMP3/SELP/CLEC3B	4
CC	GO:1990909	Wnt signalosome	3/161	13/19594	0.000146589	0.00656718	0.00617216	FZD1/RECK/ADGRA2	3
CC	GO:0031089	platelet dense granule lumen	3/161	14/19594	0.000185443	0.00692322	0.00650678	RARRES2/TIMP3/CLEC3B	3
CC	GO:0031091	platelet alpha granule	5/161	91/19594	0.000926746	0.0296559	0.0278721	FN1/THBS2/TGFB3/SELP/TIMP1	5
CC	GO:0034774	secretory granule lumen	9/161	322/19594	0.00140797	0.0350589	0.0329501	FN1/RARRES2/TIMP3/TGFB3/PKM/TIMP2/HEXB/CLEC3B/TIMP1	9
CC	GO:0060205	cytoplasmic vesicle lumen	9/161	325/19594	0.00150066	0.0350589	0.0329501	FN1/RARRES2/TIMP3/TGFB3/PKM/TIMP2/HEXB/CLEC3B/TIMP1	9
CC	GO:0031983	vesicle lumen	9/161	327/19594	0.00156513	0.0350589	0.0329501	FN1/RARRES2/TIMP3/TGFB3/PKM/TIMP2/HEXB/CLEC3B/TIMP1	9
CC	GO:0005884	actin filament	5/161	113/19594	0.0024216	0.0493126	0.0463464	DPYSL3/ANXA1/FYN/RHOQ/PSTPIP1	5
MF	GO:0005201	extracellular matrix structural constituent	15/156	172/18410	1.87361e-11	7.10098e-09	6.50833e-09	FN1/TFPI2/DCN/MFAP5/FBLN1/EDIL3/COL12A1/THBS2/NID2/CILP/COL14A1/SPON1/LAMC1/MFAP4/SRPX2	15
MF	GO:0005539	glycosaminoglycan binding	12/156	234/18410	7.52156e-07	0.000142534	0.000130638	FN1/DCN/DPYSL3/THBS2/FGF7/LYVE1/SELP/SLIT3/SEMA5A/CLEC3B/SFRP1/ADAMTS15	12
MF	GO:0005518	collagen binding	7/156	68/18410	1.7229e-06	0.00021766	0.000199494	FN1/DCN/LOX/NID2/COL14A1/P3H4/CRTAP	7
MF	GO:0008191	metalloendopeptidase inhibitor activity	4/156	16/18410	8.34e-06	0.000790215	0.000724264	TIMP3/RECK/TIMP2/TIMP1	4
MF	GO:1901681	sulfur compound binding	11/156	267/18410	1.7691e-05	0.00134098	0.00122906	FN1/DPYSL3/ENPP1/THBS2/FGF7/SELP/SLIT3/SEMA5A/CLEC3B/SFRP1/ADAMTS15	11
MF	GO:0008201	heparin binding	8/156	168/18410	9.39353e-05	0.00593358	0.00543836	FN1/THBS2/FGF7/SELP/SLIT3/CLEC3B/SFRP1/ADAMTS15	8
MF	GO:0030246	carbohydrate binding	9/156	270/18410	0.000502289	0.0271954	0.0249256	LGALS1/ENPP1/GALNT16/MRC1/PFKP/SELP/CLEC14A/CLEC3B/PPP1R3C	9
MF	GO:0061134	peptidase regulator activity	8/156	230/18410	0.000781657	0.037031	0.0339404	FN1/TFPI2/TIMP3/FBLN1/RECK/SERPINF1/TIMP2/TIMP1	8
MF	GO:0002020	protease binding	6/156	136/18410	0.00106869	0.0450037	0.0412476	FN1/ADAMTS4/TIMP3/KIT/TIMP2/TIMP1	6
MF	GO:0050840	extracellular matrix binding	4/156	55/18410	0.00120917	0.0458275	0.0420027	DCN/LGALS1/CLEC14A/ADAMTS15	4

[truncated: 14 more sheets: GO_turquoise, GO_yellow, KEGG_blue, KEGG_brown, KEGG_cyan, KEGG_darkgreen, KEGG_lightcyan, KEGG_magenta, KEGG_pink, KEGG_red, KEGG_tan, KEGG_turquoise, KEGG_yellow, KEGG_lightgreen]
