# Supplementary material for: Transcriptome Analysis of Goat Mammary Gland Tissue Reveals the Adaptive Strategies and Molecular Mechanisms of Lactation and Involution
Source: Int J Mol Sci. 2022 Nov 20;23(22):14424. doi: 10.3390/ijms232214424 (PMC9693614; doi:10.3390/ijms232214424)
Supplement: Supplementary file 1 [file ijms-23-14424-s001.zip › Table S7.xlsx]

## Sheet: ELvsPL
ID	logFC	AveExpr	t	P.Value	adj.P.Val	B	change
XM_018046941.1	-2.40073	1.55141	-9.79794	4.12903e-12	1.07739e-07	17.2273	DOWN
MSTRG.567.2	-4.28471	-0.441447	-9.2274	2.17559e-11	2.83839e-07	15.4092	DOWN
TRNAD-GUC_5	-3.75986	-0.579025	-8.115	6.22631e-10	5.41543e-06	12.2823	DOWN
XM_005680577.2	-3.51783	-0.364369	-7.27768	8.48214e-09	5.53311e-05	9.94982	DOWN
XM_005686585.3	-2.1258	3.35794	-7.15897	1.23442e-08	5.75998e-05	9.75583	DOWN
XM_018064729.1	3.92379	2.07203	7.13672	1.32449e-08	5.75998e-05	9.30953	UP
MSTRG.7208.1	-1.38714	4.09287	-6.95641	2.34717e-08	8.74924e-05	9.13266	DOWN
XM_018041805.1	3.05315	2.15839	6.89252	2.8761e-08	9.38075e-05	8.62895	UP
MSTRG.254.1	-3.29793	-0.248947	-6.84071	3.3921e-08	9.83445e-05	8.65562	DOWN
XM_018053916.1	2.19293	1.45088	6.76634	4.29982e-08	0.000112195	8.27669	UP
XM_018061382.1	-1.97081	0.905112	-6.69359	5.42381e-08	0.000115731	8.251	DOWN
MSTRG.11314.2	4.09589	5.11964	6.687	5.53925e-08	0.000115731	8.28278	UP
MSTRG.872.4	-2.79617	1.25703	-6.67444	5.76595e-08	0.000115731	8.25827	DOWN
XM_018040428.1	3.28062	0.319431	6.64262	6.38311e-08	0.000118967	7.88642	UP
XM_018041591.1	2.75772	1.35287	6.61086	7.06541e-08	0.000120907	7.77468	UP
XM_018047710.1	3.80719	4.68485	6.58455	7.68573e-08	0.000120907	7.97612	UP
MSTRG.9226.7	3.08801	0.372551	6.57685	7.87727e-08	0.000120907	7.71564	UP
XM_005698486.3	3.39282	2.14755	6.52665	9.25042e-08	0.000134095	7.59682	UP
TRNAD-GUC_25	-2.93216	-0.379281	-6.47871	1.07854e-07	0.000143221	7.54229	DOWN
XM_018056616.1	1.81851	5.88624	6.47319	1.09778e-07	0.000143221	7.64122	UP
XM_018043142.1	-1.82359	0.811221	-6.44749	1.19198e-07	0.000148107	7.51423	DOWN
XM_018056640.1	-1.69212	0.74408	-6.40562	1.3632e-07	0.00015246	7.38976	DOWN
TRNAD-GUC_10	-3.47079	-0.217443	-6.40255	1.37668e-07	0.00015246	7.35008	DOWN
XM_018049137.1	-3.46439	3.1806	-6.39679	1.40231e-07	0.00015246	7.39668	DOWN
XM_018065641.1	-3.65354	-0.15324	-6.35123	1.62293e-07	0.000169389	7.24351	DOWN
XM_005684705.3	-1.92597	1.70062	-6.32234	1.78053e-07	0.00017869	7.19343	DOWN
XM_018059368.1	-1.9773	0.870504	-6.2976	1.92762e-07	0.000186287	7.0828	DOWN
MSTRG.3322.1	-2.86597	0.824496	-6.2711	2.09869e-07	0.000190488	7.0165	DOWN
XM_018041309.1	3.13946	1.77231	6.26838	2.1171e-07	0.000190488	6.84625	UP
XM_013976290.2	-1.44927	2.4492	-6.21188	2.53807e-07	0.000210283	6.86007	DOWN
XM_018051875.1	6.43816	7.46839	6.20145	2.62455e-07	0.000210283	6.79658	UP
MSTRG.5177.10	-2.68005	-0.686417	-6.18883	2.73305e-07	0.000210283	6.66713	DOWN
XM_013970187.2	2.78728	1.77259	6.18357	2.7796e-07	0.000210283	6.55877	UP
XM_005685405.2	3.72147	3.30509	6.18277	2.78674e-07	0.000210283	6.65317	UP
XR_001917968.1	1.83879	0.8214	6.17248	2.88041e-07	0.000210283	6.51264	UP
XM_018042234.1	-3.71614	0.152703	-6.16981	2.90517e-07	0.000210283	6.71415	DOWN
MSTRG.15125.1	3.31796	2.53787	6.1617	2.98183e-07	0.000210283	6.55152	UP
TRNAD-GUC_22	-3.057	-0.326548	-6.0381	4.43519e-07	0.000304546	6.25642	DOWN
MSTRG.6855.5	-3.58724	-0.291185	-6.01377	4.79563e-07	0.000320852	6.19779	DOWN
MSTRG.9234.4	-4.05421	1.94275	-6.00517	4.93008e-07	0.000321408	6.22437	DOWN
XM_013964526.2	-3.01035	-0.220988	-5.98974	5.18063e-07	0.000321408	6.11178	DOWN
XM_018058400.1	-3.95904	0.44928	-5.98831	5.20448e-07	0.000321408	6.15995	DOWN
XM_005699051.3	-1.74388	1.90602	-5.98284	5.29665e-07	0.000321408	6.1612	DOWN
XR_001296272.2	-1.57899	2.01567	-5.96015	5.69719e-07	0.00033654	6.09216	DOWN
MSTRG.12977.1	-3.56216	0.667871	-5.95437	5.80397e-07	0.00033654	6.06673	DOWN
XM_013965444.2	4.86369	6.36724	5.92161	6.44817e-07	0.000360845	5.97489	UP
XR_001296365.2	-3.81682	2.07559	-5.91913	6.49972e-07	0.000360845	5.94054	DOWN
MSTRG.6401.1	-3.86015	2.48722	-5.90115	6.88616e-07	0.000368596	5.91279	DOWN
MSTRG.7427.3	-3.57526	0.575762	-5.88982	7.14145e-07	0.000368596	5.87367	DOWN
XM_005681795.3	2.42564	5.16258	5.88514	7.24958e-07	0.000368596	5.84613	UP
XM_005675928.3	3.10173	2.92024	5.88401	7.27598e-07	0.000368596	5.76537	UP
NM_001285539.1	6.65543	8.27603	5.88105	7.34564e-07	0.000368596	5.78233	UP
XM_018047709.1	3.34214	5.01754	5.86098	7.83476e-07	0.000385722	5.78813	UP
XM_018055006.1	-2.54873	0.957948	-5.84827	8.16124e-07	0.000394354	5.74425	DOWN
XM_018057346.1	-3.47829	0.223492	-5.8418	8.33245e-07	0.000395306	5.70694	DOWN
XR_001919099.1	-1.49947	4.096	-5.78417	1.00265e-06	0.000467183	5.50708	DOWN
TRNAD-GUC_24	-3.14521	-0.343801	-5.77768	1.02376e-06	0.000468649	5.49255	DOWN
XM_018044278.1	-3.95367	1.37161	-5.76588	1.0633e-06	0.000478355	5.49768	DOWN
XR_001917314.1	-2.10509	3.47144	-5.75688	1.09449e-06	0.000484042	5.44151	DOWN
XM_018061701.1	-2.03812	5.25269	-5.68471	1.37977e-06	0.000592076	5.17369	DOWN
TRNAE-UUC_7	-3.17596	0.834788	-5.68373	1.38415e-06	0.000592076	5.25285	DOWN
XM_013963158.2	-2.82025	-0.23332	-5.65893	1.49878e-06	0.000624919	5.1397	DOWN
XM_018059249.1	4.48092	4.29753	5.65684	1.50883e-06	0.000624919	5.10076	UP
XM_018044431.1	3.05917	2.83082	5.64067	1.58918e-06	0.000647914	5.04703	UP
XM_018066889.1	3.13492	2.56536	5.62751	1.65769e-06	0.000665446	5.01002	UP
XM_018059373.1	2.56944	0.252614	5.62153	1.68982e-06	0.00066807	4.94156	UP
XM_005676517.3	2.31384	1.81587	5.61347	1.73406e-06	0.000675325	4.94228	UP
XM_018053837.1	-3.04433	-0.31521	-5.59805	1.82193e-06	0.000692307	4.96313	DOWN
MSTRG.15612.5	-1.46942	2.67238	-5.59655	1.83073e-06	0.000692307	4.95844	DOWN
XR_310764.3	3.15666	2.97286	5.57641	1.9528e-06	0.000727922	4.8618	UP
XM_018053268.1	2.14168	0.981931	5.56778	2.00762e-06	0.000730459	4.80062	UP
XM_018066651.1	-2.01517	1.00877	-5.56654	2.0156e-06	0.000730459	4.89014	DOWN
XM_018044830.1	3.03062	0.600222	5.52904	2.27292e-06	0.000812429	4.72452	UP
MSTRG.4047.2	-3.42737	0.247195	-5.50501	2.45482e-06	0.000859243	4.70422	DOWN
TRNAE-UUC_51	-2.36477	1.67225	-5.50312	2.46975e-06	0.000859243	4.70164	DOWN
XR_001296958.2	-1.52809	2.17192	-5.49349	2.54707e-06	0.000874484	4.66049	DOWN
XM_018042358.1	-1.49271	0.800316	-5.46774	2.76593e-06	0.000924599	4.59484	DOWN
XM_005680366.2	-1.48133	7.58349	-5.46536	2.78712e-06	0.000924599	4.47522	DOWN
XM_005678297.3	-1.62065	3.05606	-5.46399	2.79934e-06	0.000924599	4.54484	DOWN
XM_018062351.1	5.48457	4.86652	5.45537	2.87768e-06	0.000931362	4.53979	UP
XM_005690937.3	2.79492	2.60566	5.4539	2.89121e-06	0.000931362	4.50789	UP
XM_018049161.1	2.32147	2.37458	5.44516	2.97324e-06	0.000946108	4.50568	UP
NM_001286087.1	-1.28718	9.7796	-5.43201	3.10101e-06	0.000974875	4.36065	DOWN
XM_018061191.1	2.73504	1.71541	5.4126	3.29958e-06	0.00102495	4.36558	UP
TRNAE-UUC_52	-2.99353	1.23974	-5.4064	3.36566e-06	0.00103318	4.41062	DOWN
XR_001297386.2	-1.44822	2.78068	-5.39668	3.47197e-06	0.00105342	4.35403	DOWN
XM_013966310.2	-2.98515	0.349633	-5.38757	3.57461e-06	0.00106799	4.36012	DOWN
XM_018046094.1	-2.29786	2.06042	-5.38229	3.63544e-06	0.00106799	4.31231	DOWN
XM_018038942.1	3.14721	0.928005	5.38166	3.64277e-06	0.00106799	4.26561	UP
XM_018049191.1	-1.63246	1.84148	-5.3775	3.69156e-06	0.00106816	4.31552	DOWN
XM_018045131.1	2.34997	3.42011	5.37465	3.72524e-06	0.00106816	4.30608	UP
TRNAE-UUC_81	-2.84727	0.94874	-5.34642	4.07687e-06	0.00115628	4.2374	DOWN
XM_005709526.3	-1.56813	9.79266	-5.33532	4.22407e-06	0.00117339	4.06101	DOWN
MSTRG.8605.3	-3.65527	-0.181997	-5.33509	4.22713e-06	0.00117339	4.2025	DOWN
XM_018056503.1	-2.50966	1.10622	-5.32353	4.38616e-06	0.00118225	4.16733	DOWN
MSTRG.5007.7	-3.00527	-0.0638721	-5.32352	4.38627e-06	0.00118225	4.15694	DOWN
MSTRG.8411.3	2.66049	1.43963	5.3229	4.39497e-06	0.00118225	4.1142	UP
XM_018046567.1	-1.08837	3.01237	-5.31289	4.53769e-06	0.00120738	4.07728	DOWN
XM_018041250.1	-1.93789	0.537732	-5.30992	4.58096e-06	0.00120738	4.12653	DOWN
XM_018058366.1	-2.58372	6.92466	-5.29688	4.77568e-06	0.00124612	3.95472	DOWN
XM_018060465.1	-0.838305	6.29445	-5.28352	4.98354e-06	0.00128748	3.92093	NOT
TRNAD-GUC_11	-3.89284	0.0271588	-5.27857	5.06285e-06	0.00129515	4.03514	DOWN
XM_013973051.2	-2.02554	2.07716	-5.26254	5.32858e-06	0.00134989	3.97329	DOWN
XM_005693140.3	-3.05913	-0.182175	-5.25192	5.51204e-06	0.001371	3.9454	DOWN
XM_018065108.1	3.33622	1.71112	5.24877	5.56775e-06	0.001371	3.88738	UP
XM_018056371.1	2.59367	2.78259	5.24867	5.56954e-06	0.001371	3.93696	UP
MSTRG.11653.1	-1.96896	1.63695	-5.24347	5.66254e-06	0.00138087	3.92263	DOWN
MSTRG.7210.2	-3.03282	-0.0501432	-5.21904	6.12097e-06	0.00147884	3.85056	DOWN
XM_018052159.1	-2.5789	0.052709	-5.21178	6.26419e-06	0.00149883	3.83661	DOWN
MSTRG.1431.1	2.19705	1.05903	5.20899	6.32008e-06	0.00149883	3.77595	UP
MSTRG.2786.2	-2.2642	2.47327	-5.20623	6.37604e-06	0.00149883	3.77804	DOWN
XM_018045928.1	-3.17863	1.68907	-5.19947	6.51468e-06	0.00150703	3.76728	DOWN
XM_018055375.1	-2.4572	3.73873	-5.1989	6.52645e-06	0.00150703	3.70009	DOWN
XM_018053181.1	-2.3543	0.957972	-5.19349	6.63988e-06	0.00151978	3.74904	DOWN
XM_005681783.3	-1.44693	0.738672	-5.18939	6.72718e-06	0.00152637	3.76804	DOWN
XM_005688286.3	-1.38202	8.85532	-5.1833	6.8589e-06	0.00154284	3.59666	DOWN
XM_018042219.1	-2.26983	1.01651	-5.18002	6.9309e-06	0.00154571	3.73702	DOWN
XM_018053850.1	2.44561	0.700827	5.16162	7.34881e-06	0.00162502	3.62366	UP
XR_001296366.2	-2.50081	1.20595	-5.14507	7.74591e-06	0.00169844	3.57163	DOWN
MSTRG.2094.5	-1.09264	3.2722	-5.13638	7.96307e-06	0.00172703	3.5386	DOWN
MSTRG.13732.2	3.09693	0.470635	5.13458	8.0087e-06	0.00172703	3.57049	UP
XM_018056107.1	-2.17881	-0.0707387	-5.12448	8.26994e-06	0.00176875	3.56475	DOWN
XM_005675126.3	2.43037	0.989634	5.11487	8.52657e-06	0.00180881	3.49029	UP
XM_018050991.1	1.57071	2.17891	5.11084	8.63635e-06	0.00181732	3.53684	UP
XM_013976000.2	2.34025	0.881443	5.10623	8.76376e-06	0.00182296	3.4739	UP
XM_018059106.1	3.97843	2.49587	5.10483	8.80288e-06	0.00182296	3.48279	UP
XM_018049587.1	1.4749	2.61538	5.0982	8.99012e-06	0.00184708	3.50061	UP
XM_018044650.1	1.72035	1.75046	5.07894	9.55719e-06	0.00192705	3.41319	UP
XM_018066595.1	2.49592	1.48345	5.07755	9.59937e-06	0.00192705	3.4082	UP
XM_005694130.2	-3.01378	1.18937	-5.0775	9.60092e-06	0.00192705	3.43644	DOWN
XM_013966061.2	2.03573	1.50906	5.06209	1.00821e-05	0.00200712	3.34922	UP
MSTRG.12858.5	-2.56825	-0.215076	-5.05759	1.02273e-05	0.00200712	3.37248	DOWN
XM_013974316.2	2.19585	2.23326	5.05748	1.02306e-05	0.00200712	3.36983	UP
XM_005682121.3	2.02285	6.14687	5.05421	1.03375e-05	0.00201297	3.23548	UP
MSTRG.8206.11	-2.77661	0.207334	-5.04263	1.07241e-05	0.00207244	3.33422	DOWN
XM_018062788.1	-1.34639	9.56295	-5.03948	1.08317e-05	0.00207244	3.15085	DOWN
XM_013962681.2	-1.32338	2.54729	-5.03804	1.08812e-05	0.00207244	3.27412	DOWN
XM_005693542.3	-1.5492	2.13873	-5.03433	1.101e-05	0.00208177	3.27847	DOWN
TRNAE-UUC_2	-2.34277	1.36563	-5.02673	1.12786e-05	0.00211721	3.26825	DOWN
MSTRG.4570.1	-5.60905	0.529648	-5.02239	1.14348e-05	0.0021312	3.27274	DOWN
NM_001285548.1	4.62389	8.51833	5.01554	1.16857e-05	0.00216251	3.11568	UP
MSTRG.78.1	-1.49202	2.68991	-5.01066	1.18676e-05	0.00218071	3.16154	DOWN
XR_001296386.2	-1.81192	1.85677	-5.006	1.2044e-05	0.00219766	3.20956	DOWN
MSTRG.16036.1	-2.53839	-0.710428	-4.99712	1.23877e-05	0.00222831	3.18977	DOWN
XM_018040239.1	2.6277	-0.0147529	4.99493	1.24739e-05	0.00222831	3.15259	UP
XM_018057876.1	-1.54181	0.745808	-4.99453	1.24896e-05	0.00222831	3.19606	DOWN
XM_018060825.1	-2.37887	0.350815	-4.99292	1.25536e-05	0.00222831	3.18807	DOWN
XM_005700599.3	-1.81233	3.40524	-4.98548	1.28529e-05	0.00226602	3.03394	DOWN
MSTRG.16885.2	-1.11633	1.89707	-4.97803	1.31593e-05	0.00229873	3.12813	DOWN
XM_005675281.3	2.63866	2.26142	4.97481	1.32943e-05	0.00229873	3.11652	UP
XM_018040692.1	-1.66291	3.60689	-4.97461	1.33027e-05	0.00229873	3.00703	DOWN
MSTRG.17137.7	-3.5205	1.2589	-4.97238	1.33969e-05	0.00229977	3.10588	DOWN
XR_001296302.2	-3.9599	2.04877	-4.96668	1.36406e-05	0.0023263	3.05106	DOWN
MSTRG.16427.5	4.35226	4.99406	4.95854	1.39962e-05	0.00237146	3.07593	UP
MSTRG.13283.1	-3.16142	5.52871	-4.93191	1.52256e-05	0.00255829	2.84084	DOWN
XM_018043569.1	-2.62849	1.77075	-4.9282	1.54051e-05	0.00255829	2.9316	DOWN
XM_005678681.3	3.00993	2.10857	4.92752	1.54381e-05	0.00255829	2.98395	UP
MSTRG.11967.2	-2.9877	1.98615	-4.9245	1.55865e-05	0.00255829	2.95072	DOWN
MSTRG.12044.1	-2.48545	0.801947	-4.92321	1.56499e-05	0.00255829	2.9787	DOWN
MSTRG.4292.3	2.63616	0.189459	4.92246	1.56872e-05	0.00255829	2.94715	UP
XM_018064243.1	2.69758	3.30863	4.91638	1.5991e-05	0.00257035	2.96372	UP
XM_005680545.3	-3.06226	-0.0864692	-4.91552	1.60347e-05	0.00257035	2.96485	DOWN
XM_018059246.1	3.24631	2.10415	4.91416	1.61036e-05	0.00257035	2.94037	UP
XM_005684081.3	-3.67919	-0.388185	-4.91248	1.61896e-05	0.00257035	2.95595	DOWN
XM_018064877.1	-1.18393	0.773233	-4.91122	1.62537e-05	0.00257035	2.95189	DOWN
XM_018039547.1	2.04298	3.47231	4.90854	1.63918e-05	0.00257657	2.91492	UP
XM_018060946.1	1.81527	1.71789	4.89567	1.70714e-05	0.00266734	2.89402	UP
MSTRG.9606.2	-2.14768	0.137372	-4.89223	1.72579e-05	0.00266801	2.89345	DOWN
XM_013964499.2	-1.50781	0.801079	-4.89182	1.72802e-05	0.00266801	2.89512	DOWN
MSTRG.7038.1	-1.08636	4.45197	-4.88354	1.77375e-05	0.0027225	2.7206	DOWN
XR_001296353.2	-0.94116	3.23926	-4.87608	1.81598e-05	0.00274053	2.7399	NOT
XM_018049266.1	-2.5177	4.392	-4.87535	1.82019e-05	0.00274053	2.67159	DOWN
MSTRG.16013.1	-2.45326	0.945509	-4.87454	1.82486e-05	0.00274053	2.82707	DOWN
MSTRG.3761.2	-3.15077	0.738725	-4.87408	1.82751e-05	0.00274053	2.83192	DOWN
XM_018053842.1	2.89765	0.590391	4.87204	1.83927e-05	0.00274105	2.81368	UP
MSTRG.9189.2	-2.10081	0.20369	-4.87039	1.84886e-05	0.00274105	2.81794	DOWN
MSTRG.5971.1	-2.24598	0.465799	-4.85902	1.91633e-05	0.00282501	2.79901	DOWN
XM_005693838.3	2.51923	3.13112	4.85295	1.95333e-05	0.00286339	2.78074	UP
XM_005675647.3	-2.23205	1.33198	-4.85076	1.96685e-05	0.0028671	2.76418	DOWN
MSTRG.9245.4	2.44532	0.631762	4.84126	2.02659e-05	0.00292504	2.71517	UP
XM_018062204.1	2.87634	1.73805	4.84088	2.02902e-05	0.00292504	2.72854	UP
XM_018040573.1	-1.40781	1.44377	-4.8346	2.06958e-05	0.00296711	2.71561	DOWN
XM_018045708.1	3.92722	3.5556	4.82705	2.11935e-05	0.00299188	2.70323	UP
XR_001919832.1	-1.51432	3.55653	-4.82367	2.14199e-05	0.00299188	2.57462	DOWN
MSTRG.9408.1	-2.44367	4.44388	-4.82275	2.1482e-05	0.00299188	2.5301	DOWN
XM_018063239.1	1.94665	3.60839	4.82224	2.15167e-05	0.00299188	2.67534	UP
XM_005679470.3	2.13196	1.97771	4.82221	2.15185e-05	0.00299188	2.69196	UP
XM_005692721.3	-1.23769	9.78902	-4.82117	2.15895e-05	0.00299188	2.484	DOWN
XM_018060582.1	-1.30186	0.608438	-4.81996	2.1672e-05	0.00299188	2.68647	DOWN
XM_018038870.1	-3.05871	1.27528	-4.81829	2.17858e-05	0.00299188	2.6645	DOWN
XM_005692178.3	-0.705866	3.12468	-4.81641	2.19155e-05	0.00299393	2.58271	NOT
MSTRG.17745.2	2.46887	1.98677	4.80679	2.25884e-05	0.00306978	2.63768	UP
XM_018055320.1	-2.36223	3.30473	-4.79948	2.31135e-05	0.00312487	2.47878	DOWN
XM_018059853.1	-1.72447	0.93301	-4.79357	2.3547e-05	0.00316708	2.60825	DOWN
XM_018063672.1	3.9477	3.55302	4.78728	2.40178e-05	0.00321383	2.5888	UP
MSTRG.7511.5	2.46771	1.65482	4.78433	2.42413e-05	0.0032259	2.56879	UP
XM_005691619.3	-0.968223	5.69997	-4.78172	2.44409e-05	0.0032259	2.39362	NOT
MSTRG.10074.1	-1.10692	2.81566	-4.78122	2.44789e-05	0.0032259	2.44368	DOWN
NM_001285732.1	5.03508	6.36916	4.77795	2.47322e-05	0.00323731	2.52236	UP
MSTRG.9577.2	-1.65701	0.785636	-4.7769	2.48136e-05	0.00323731	2.5094	DOWN
XM_005695580.3	-0.910435	3.68151	-4.77345	2.50838e-05	0.00325627	2.4093	NOT
XM_005701299.3	2.58385	0.703721	4.77019	2.5342e-05	0.00327351	2.51647	UP
XM_018045427.1	3.14567	2.10128	4.76808	2.55105e-05	0.00327904	2.52556	UP
MSTRG.1556.2	-3.93272	0.134527	-4.75771	2.63553e-05	0.00334909	2.50107	DOWN
XM_018043972.1	-1.30827	2.7333	-4.7558	2.65134e-05	0.00334909	2.43019	DOWN
MSTRG.3089.1	-4.56531	0.872194	-4.75578	2.65149e-05	0.00334909	2.48511	DOWN
XM_018038652.1	1.6546	0.622194	4.75448	2.66232e-05	0.00334909	2.46712	UP
XM_018043497.1	1.72971	0.587382	4.7536	2.66972e-05	0.00334909	2.4553	UP
TRNAG-CCC_50	-1.77194	1.38876	-4.74936	2.7055e-05	0.00337773	2.45635	DOWN
XM_018039139.1	-1.35134	0.88004	-4.73834	2.80063e-05	0.00345003	2.44708	DOWN
MSTRG.4516.4	1.80741	0.684653	4.73818	2.80203e-05	0.00345003	2.43096	UP
XM_018042248.1	2.24667	1.41938	4.73669	2.81516e-05	0.00345003	2.4374	UP
XM_018051464.1	-0.859174	6.147	-4.73656	2.8163e-05	0.00345003	2.2535	NOT
XM_005678509.3	-1.15789	5.74485	-4.73433	2.83605e-05	0.00345799	2.2495	DOWN
XM_018058683.1	-2.44149	2.38558	-4.72832	2.89003e-05	0.00350742	2.3397	DOWN
XM_018041367.1	-2.71057	-0.520412	-4.72659	2.90577e-05	0.0035102	2.41467	DOWN
XM_005679037.3	-1.35725	5.29134	-4.72387	2.93058e-05	0.00352385	2.22091	DOWN
XM_018040389.1	-1.36598	1.47585	-4.72105	2.95665e-05	0.00353889	2.37547	DOWN
XM_018040602.1	-1.12612	3.2301	-4.71502	3.01305e-05	0.00358993	2.24296	DOWN
XM_005679972.3	3.1882	2.73901	4.70671	3.09247e-05	0.00366781	2.35945	UP
XM_018044509.1	2.23714	1.87445	4.70424	3.11655e-05	0.0036751	2.35033	UP
XR_001297040.1	-1.48076	5.18665	-4.70319	3.12679e-05	0.0036751	2.16281	DOWN
XM_005683032.3	-0.953378	4.26714	-4.69918	3.16628e-05	0.00370483	2.17453	NOT
XM_018049005.1	-1.93471	0.665088	-4.69432	3.21483e-05	0.00374484	2.30711	DOWN
XM_005700702.3	-3.07297	0.831978	-4.69217	3.23651e-05	0.00375335	2.3038	DOWN
TRNAD-GUC_13	-2.8652	-0.15099	-4.69017	3.25692e-05	0.0037603	2.31214	DOWN
XM_018042703.1	-2.40552	-0.402519	-4.67959	3.36653e-05	0.00383781	2.28043	DOWN
MSTRG.17734.1	1.96226	1.35264	4.6791	3.37171e-05	0.00383781	2.27514	UP
MSTRG.10764.1	-3.48992	0.872956	-4.678	3.38331e-05	0.00383781	2.24751	DOWN
XM_018061096.1	2.05264	2.39026	4.67738	3.38986e-05	0.00383781	2.27447	UP
XM_018038497.1	4.21191	1.17556	4.67665	3.39759e-05	0.00383781	2.26444	UP
XM_018066085.1	-0.927289	4.11333	-4.66794	3.49138e-05	0.00392675	2.08093	NOT
MSTRG.6655.1	-1.24786	10.9076	-4.66334	3.54196e-05	0.00396653	2.00179	DOWN
XM_018039136.1	2.37097	0.502573	4.65765	3.60554e-05	0.00398469	2.19834	UP
XM_005694716.2	-1.21546	5.1441	-4.65711	3.61165e-05	0.00398469	2.02147	DOWN
XM_018055771.1	-1.81089	2.38086	-4.65627	3.62109e-05	0.00398469	2.15273	DOWN
XM_018046451.1	-1.2927	1.6038	-4.65618	3.6221e-05	0.00398469	2.18231	DOWN
TRNAD-GUC_15	-2.88157	1.37171	-4.65509	3.63452e-05	0.00398469	2.14902	DOWN
XM_018050984.1	-2.14572	2.58529	-4.65031	3.68924e-05	0.00401294	2.12619	DOWN
XM_013973815.2	1.99205	0.981234	4.65015	3.69105e-05	0.00401294	2.17929	UP
XM_005689072.3	3.15548	2.5397	4.64698	3.72777e-05	0.00403605	2.18404	UP
MSTRG.2177.3	-1.63063	3.17278	-4.63743	3.84066e-05	0.00412688	2.01493	DOWN
XM_018060710.1	-0.96382	4.08713	-4.63721	3.8433e-05	0.00412688	1.98501	NOT
XM_005675838.3	2.71228	2.19043	4.6341	3.88072e-05	0.00414999	2.14502	UP
MSTRG.6901.1	-1.36278	1.55896	-4.62858	3.94816e-05	0.00420487	2.11804	DOWN
XM_018061053.1	2.87384	1.49508	4.62711	3.96632e-05	0.00420704	2.12118	UP
XM_018057446.1	-1.99246	2.62712	-4.62373	4.00836e-05	0.00423442	2.00536	DOWN
XM_018065938.1	2.7522	1.6793	4.62226	4.02687e-05	0.00423682	2.1068	UP
MSTRG.9014.1	2.17105	0.746262	4.61492	4.12008e-05	0.00431748	2.08228	UP
XM_005679774.3	1.74092	0.920564	4.61148	4.16452e-05	0.00434187	2.08646	UP
MSTRG.12424.5	-1.77229	0.522975	-4.61055	4.17664e-05	0.00434187	2.07928	DOWN
XM_018041222.1	3.13558	0.431946	4.60728	4.2194e-05	0.00435386	2.06688	UP
TRNAD-GUC_17	-2.01196	0.517592	-4.60712	4.22154e-05	0.00435386	2.06635	DOWN
XM_018066983.1	3.5998	2.75414	4.60163	4.29438e-05	0.00441155	2.05744	UP
XM_018051138.1	3.08251	1.92952	4.59167	4.42976e-05	0.00453277	2.0259	UP
XR_001919899.1	-2.46463	3.10239	-4.58901	4.46665e-05	0.00455267	1.90314	DOWN
XM_018041391.1	3.72203	2.96124	4.58775	4.48424e-05	0.00455281	2.01668	UP
XM_018040378.1	-0.831735	4.25511	-4.58462	4.52817e-05	0.0045796	1.82031	NOT
XM_005687733.3	1.64542	1.66477	4.57496	4.66638e-05	0.00470115	1.98087	UP
XM_018066039.1	4.0064	1.70078	4.56641	4.79217e-05	0.00480932	1.95304	UP
XM_018056175.1	3.50085	0.697748	4.56352	4.83549e-05	0.0048342	1.94548	UP
XM_018064786.1	1.93507	2.31008	4.5617	4.86294e-05	0.00484308	1.93794	UP
XM_018060154.1	-1.99489	0.566599	-4.55965	4.89399e-05	0.00484783	1.93622	DOWN
XM_018039818.1	-3.01257	0.569813	-4.55894	4.90487e-05	0.00484783	1.93677	DOWN
NM_001314221.1	-3.30396	3.93495	-4.55703	4.9341e-05	0.00485831	1.71524	DOWN
XM_005679284.3	3.40287	1.03102	4.5553	4.96068e-05	0.00486613	1.91927	UP
XM_018060504.1	1.85214	1.24818	4.54765	5.08005e-05	0.00494749	1.89472	UP
XM_005690616.3	4.39875	3.90373	4.54756	5.08155e-05	0.00494749	1.90501	UP
XM_013967700.2	1.65222	1.45485	4.5451	5.12059e-05	0.00496697	1.89195	UP
XM_018050752.1	3.68249	3.0132	4.541	5.1861e-05	0.00501188	1.88647	UP
XM_018064150.1	-2.54112	1.14067	-4.538	5.23466e-05	0.00502733	1.80125	DOWN
MSTRG.13680.3	2.78991	0.848932	4.53669	5.25606e-05	0.00502733	1.86726	UP
XM_018063934.1	-5.52633	1.47368	-4.53646	5.25989e-05	0.00502733	1.80751	DOWN
XM_018064523.1	2.09791	0.886683	4.53244	5.32586e-05	0.00507181	1.85149	UP
XM_005697009.3	1.39658	1.90869	4.52925	5.37895e-05	0.0050993	1.84527	UP
XR_001919414.1	-0.834228	2.48311	-4.52654	5.42443e-05	0.0050993	1.75545	NOT
XM_018056827.1	4.08374	4.38347	4.52606	5.43257e-05	0.0050993	1.8441	UP
XR_001296397.2	-1.29013	1.86236	-4.52583	5.43637e-05	0.0050993	1.78706	DOWN
XM_013968228.2	1.15011	2.06908	4.52488	5.45243e-05	0.0050993	1.83973	UP
XM_018065115.1	1.25363	1.96462	4.52294	5.48537e-05	0.00511178	1.81624	UP
XM_018065097.1	3.45674	2.09894	4.52014	5.53327e-05	0.00512658	1.82731	UP
XM_018042300.1	1.94543	6.3569	4.51884	5.55562e-05	0.00512658	1.6151	UP
XM_005686638.3	-0.717131	3.93484	-4.51858	5.56019e-05	0.00512658	1.64852	NOT
MSTRG.14558.2	-0.85299	2.63085	-4.51482	5.62534e-05	0.00512745	1.69503	NOT
XR_001919329.1	-1.61223	2.06639	-4.51439	5.63295e-05	0.00512745	1.73192	DOWN
XR_001296636.2	-1.42275	5.8454	-4.51355	5.64754e-05	0.00512745	1.58399	DOWN
XM_005700291.3	-1.23498	8.69196	-4.51313	5.65503e-05	0.00512745	1.56213	DOWN
MSTRG.13144.2	3.05178	0.723342	4.51112	5.69025e-05	0.00512745	1.79412	UP
XM_018040732.1	1.80625	0.603664	4.51081	5.69576e-05	0.00512745	1.79343	UP
XR_001296388.2	-1.64439	0.935429	-4.51065	5.6987e-05	0.00512745	1.78911	DOWN
XM_005693949.3	1.97957	1.49831	4.5057	5.78674e-05	0.00515676	1.78461	UP
XM_018042708.1	-1.00606	8.79556	-4.50569	5.78705e-05	0.00515676	1.5402	DOWN
XM_005693463.3	-0.704924	5.74997	-4.50452	5.80802e-05	0.00515676	1.56243	NOT
XM_005696305.3	-2.81103	3.65189	-4.5037	5.8229e-05	0.00515676	1.58316	DOWN
XM_018064236.1	-1.21025	5.87966	-4.5033	5.83008e-05	0.00515676	1.55219	DOWN
XM_005709429.3	-1.28596	9.95207	-4.49432	5.99466e-05	0.00528441	1.50045	DOWN
XM_005698076.3	3.0237	2.83745	4.49221	6.03391e-05	0.00529585	1.74431	UP
XM_018050054.1	-1.42409	7.81754	-4.49117	6.05337e-05	0.00529585	1.5024	DOWN
XM_018044651.1	1.34751	0.320973	4.49037	6.06853e-05	0.00529585	1.72648	UP
NM_001314188.1	-5.0907	1.3083	-4.48701	6.132e-05	0.00533341	1.70155	DOWN
XM_005696396.3	1.7477	0.813944	4.48496	6.1711e-05	0.00534267	1.71672	UP
XM_018040934.1	-2.51771	0.915304	-4.4843	6.1836e-05	0.00534267	1.71452	DOWN
MSTRG.14903.1	-1.31194	3.39101	-4.48068	6.25334e-05	0.0053851	1.54503	DOWN
XM_013967459.2	-2.54937	-1.02012	-4.47792	6.30708e-05	0.0054052	1.70812	DOWN
XM_005683043.3	-1.57279	4.50897	-4.47736	6.31812e-05	0.0054052	1.50199	DOWN
XM_005676351.3	2.39036	1.10762	4.47274	6.40899e-05	0.00546502	1.68706	UP
MSTRG.14647.1	-1.29436	4.3102	-4.47043	6.45499e-05	0.00548632	1.4785	DOWN
XM_018043261.1	-1.91875	1.8212	-4.46904	6.48291e-05	0.00549216	1.61859	DOWN
XM_018045147.1	1.91934	0.869046	4.4662	6.54012e-05	0.0055065	1.66981	UP
MSTRG.13881.2	-4.59229	-0.216953	-4.46611	6.54204e-05	0.0055065	1.65858	DOWN
MSTRG.11142.2	-2.00262	1.51844	-4.46382	6.58857e-05	0.00551291	1.61831	DOWN
MSTRG.17116.1	-1.39889	3.06734	-4.46349	6.59512e-05	0.00551291	1.50547	DOWN
XM_018054282.1	2.47724	-0.0527717	4.46193	6.62706e-05	0.00551291	1.65429	UP
XM_005684069.3	-1.11612	6.72358	-4.46159	6.63417e-05	0.00551291	1.42381	DOWN
XM_005687020.3	-1.30907	5.04916	-4.45684	6.73225e-05	0.00557665	1.42706	DOWN
MSTRG.11775.4	-1.0811	2.57237	-4.45404	6.79095e-05	0.00558073	1.52832	DOWN
XM_005696547.3	-1.26707	0.969487	-4.4537	6.79793e-05	0.00558073	1.62458	DOWN
NM_001287041.1	4.70284	2.81756	4.45327	6.80708e-05	0.00558073	1.63823	UP
XM_018064673.1	2.80701	2.85823	4.45236	6.82626e-05	0.00558073	1.60353	UP
XM_005697139.3	-1.88425	-0.759204	-4.45151	6.8443e-05	0.00558073	1.62987	DOWN
XM_005701764.3	-1.02672	9.96281	-4.45051	6.8655e-05	0.00558073	1.37021	DOWN
MSTRG.2177.4	3.37067	2.44519	4.44618	6.95784e-05	0.00563822	1.6186	UP
XM_013976300.2	1.89961	0.683749	4.44278	7.03139e-05	0.00567066	1.60122	UP
XM_005680265.3	-2.4266	3.15944	-4.44232	7.04133e-05	0.00567066	1.46139	DOWN
TRNAG-GCC_2	-2.16453	0.851767	-4.44011	7.08969e-05	0.00569204	1.57932	DOWN
MSTRG.7526.3	2.94315	0.90946	4.42968	7.32185e-05	0.00585009	1.56727	UP
XM_018039876.1	-2.07594	2.10031	-4.42905	7.33616e-05	0.00585009	1.47397	DOWN
MSTRG.9092.4	-0.963103	2.0259	-4.4274	7.37354e-05	0.00585009	1.49208	NOT
XM_005692114.3	-1.62948	2.37633	-4.42653	7.3935e-05	0.00585009	1.46116	DOWN
NM_001285555.1	2.78891	7.05718	4.4263	7.39864e-05	0.00585009	1.38655	UP
XM_013962452.2	-3.79562	0.823134	-4.42414	7.44815e-05	0.00586405	1.53776	DOWN
XM_018061847.1	3.08189	1.59228	4.42357	7.46125e-05	0.00586405	1.55451	UP
XM_018061700.1	0.840915	4.66767	4.42153	7.50852e-05	0.00588348	1.35006	NOT
XM_005697681.3	-0.649581	4.0366	-4.41958	7.55371e-05	0.00589388	1.34696	NOT
MSTRG.7611.4	-1.56574	1.91796	-4.41901	7.56698e-05	0.00589388	1.45988	DOWN
XM_005699493.2	1.16439	2.57963	4.41742	7.6042e-05	0.00589915	1.49968	UP
XM_018044399.1	1.79685	1.89783	4.4168	7.61895e-05	0.00589915	1.52495	UP
TRNAG-GCC_18	-2.20671	0.859477	-4.41238	7.7234e-05	0.00595889	1.49891	DOWN
XM_018063860.1	2.84042	0.279757	4.41092	7.75829e-05	0.00595889	1.51491	UP
XM_018066312.1	2.33998	-0.174196	4.41066	7.76462e-05	0.00595889	1.51169	UP
XM_005688570.3	3.00148	2.8269	4.40949	7.79258e-05	0.00596281	1.5159	UP
XM_005700383.1	1.99121	0.896692	4.40776	7.83434e-05	0.00597516	1.50498	UP
XM_018045400.1	2.50407	2.33462	4.40693	7.85453e-05	0.00597516	1.50535	UP
XM_018061475.1	3.14763	0.922905	4.40017	8.0199e-05	0.00608262	1.4863	UP
XR_001918958.1	-1.40466	3.18652	-4.39855	8.06015e-05	0.00608262	1.34705	DOWN
XR_001919937.1	-0.94964	1.30976	-4.39832	8.06571e-05	0.00608262	1.45489	NOT
MSTRG.11715.1	-2.38294	-0.477881	-4.39669	8.10633e-05	0.00609564	1.47668	DOWN
XM_005679944.3	-0.670747	3.77718	-4.39456	8.1597e-05	0.00610949	1.29145	NOT
XM_018049652.1	2.6274	0.327525	4.39359	8.18411e-05	0.00610949	1.46611	UP
MSTRG.3383.1	-1.86848	1.40902	-4.39232	8.21626e-05	0.00610949	1.33705	DOWN
TRNAG-UCC_12	-2.48684	-0.589682	-4.39182	8.22909e-05	0.00610949	1.46587	DOWN
XR_001296687.2	-2.93891	0.212994	-4.39131	8.24183e-05	0.00610949	1.43096	DOWN
XM_018060224.1	3.49528	6.17045	4.38519	8.39883e-05	0.00618563	1.3162	UP
MSTRG.1195.1	-2.59932	1.03409	-4.38495	8.40516e-05	0.00618563	1.32753	DOWN
MSTRG.9144.1	4.78822	4.34447	4.38405	8.42824e-05	0.00618563	1.44359	UP
XM_005684572.3	0.987006	3.04354	4.38363	8.43937e-05	0.00618563	1.36785	NOT
XM_018066062.1	2.95413	2.16484	4.37592	8.64206e-05	0.00631645	1.42186	UP
XM_018063790.1	2.55457	1.59152	4.37417	8.68871e-05	0.00631899	1.41443	UP
MSTRG.849.1	-3.50922	2.20285	-4.37397	8.69397e-05	0.00631899	1.25705	DOWN
TRNAG-GCC_13	-2.20303	0.855161	-4.37253	8.73272e-05	0.00632161	1.38958	DOWN
XM_018038718.1	-2.76646	0.300427	-4.37203	8.74602e-05	0.00632161	1.40898	DOWN
XM_005680728.2	-1.17079	7.01481	-4.36827	8.84802e-05	0.00637767	1.14571	DOWN
XM_018051783.1	-2.4121	1.77911	-4.36505	8.93616e-05	0.00642345	1.32944	DOWN
XM_018048446.1	0.95599	4.11859	4.35984	9.08055e-05	0.00646246	1.21026	NOT
MSTRG.4924.9	-1.14657	1.34364	-4.35943	9.09199e-05	0.00646246	1.34487	DOWN
XM_018057743.1	3.30209	0.431038	4.35936	9.09377e-05	0.00646246	1.37386	UP
XM_005687128.3	-1.00113	9.96214	-4.35893	9.1058e-05	0.00646246	1.09937	DOWN
MSTRG.10316.6	1.78	1.54745	4.35799	9.13233e-05	0.00646246	1.37114	UP
XR_001918879.1	3.09967	1.75924	4.35775	9.13903e-05	0.00646246	1.37145	UP
XR_001919386.1	-0.827286	4.56764	-4.35681	9.16534e-05	0.00646355	1.14493	NOT
XM_018054483.1	1.86524	0.908772	4.35384	9.24945e-05	0.00647904	1.35883	UP
NM_001285750.1	-3.97526	-0.389331	-4.35377	9.25151e-05	0.00647904	1.33932	DOWN
XM_018051953.1	2.40143	-0.113343	4.35341	9.2618e-05	0.00647904	1.35434	UP
MSTRG.9014.2	-2.34595	-0.308581	-4.35253	9.28697e-05	0.00647928	1.35533	DOWN
XM_018062561.1	3.8141	6.02483	4.34996	9.36051e-05	0.00651317	1.26247	UP
XM_005699090.2	-1.26839	2.37568	-4.34844	9.40421e-05	0.00652617	1.24178	DOWN
XM_013975598.2	-0.783281	4.53328	-4.34695	9.44746e-05	0.00653879	1.11688	NOT
XM_018059191.1	-1.30038	1.46568	-4.34386	9.5376e-05	0.00658372	1.27024	DOWN
MSTRG.3119.1	-2.31139	0.608161	-4.34229	9.58361e-05	0.006589	1.32469	DOWN
MSTRG.17947.1	1.17121	1.44228	4.34188	9.59575e-05	0.006589	1.32471	UP
XM_018040242.1	2.50345	2.16745	4.33999	9.65166e-05	0.00660999	1.32206	UP
XR_001297222.2	-0.811833	6.26356	-4.33913	9.67737e-05	0.00661025	1.07004	NOT
XM_018066774.1	-2.69587	0.876684	-4.32639	0.000100634	0.00683156	1.24706	DOWN
XM_018067093.1	-0.998115	10.1015	-4.32617	0.000100701	0.00683156	1.00238	NOT
XM_018050668.1	-1.84976	1.09234	-4.32579	0.000100817	0.00683156	1.24132	DOWN
XM_018039677.1	-1.184	1.5393	-4.32475	0.000101141	0.00683156	1.22238	DOWN
XM_005698825.3	-0.955123	1.75239	-4.32416	0.000101323	0.00683156	1.21913	NOT
MSTRG.8181.3	-1.95656	0.6657	-4.32182	0.000102055	0.00686317	1.23568	DOWN
XM_013973792.2	1.86993	2.85352	4.32077	0.000102382	0.00686749	1.22869	UP
XM_005679909.1	-0.944959	6.82658	-4.31723	0.000103501	0.00692478	0.99906	NOT
MSTRG.17577.1	-1.58916	1.31126	-4.31599	0.000103895	0.00693331	1.2067	DOWN
MSTRG.4189.2	6.21481	6.8724	4.31467	0.000104316	0.00694368	0.984194	UP
XM_018062224.1	-3.77902	1.09976	-4.31103	0.000105488	0.00700379	1.19908	DOWN
XM_018051601.1	-2.45711	4.79326	-4.30752	0.000106629	0.00706162	1.00154	DOWN
MSTRG.13101.1	-1.45015	0.94544	-4.30484	0.000107509	0.0070908	1.10049	DOWN
MSTRG.3149.2	3.1114	2.1043	4.30452	0.000107613	0.0070908	1.20981	UP
XM_005697661.3	-1.27623	5.40734	-4.30002	0.000109109	0.00716468	0.964179	DOWN
XM_018055166.1	-2.28205	-0.765389	-4.2995	0.000109284	0.00716468	1.20956	DOWN
XM_005684429.3	-1.67325	1.23689	-4.29625	0.000110377	0.00721822	1.14954	DOWN
XM_005700790.3	2.77131	4.08582	4.29382	0.0001112	0.00724971	1.0834	UP
MSTRG.13052.1	-1.7153	4.45731	-4.2932	0.000111414	0.00724971	0.967339	DOWN
XM_018062624.1	2.86253	0.318057	4.28789	0.000113241	0.00732922	1.17594	UP
XM_013965624.2	1.40298	3.07517	4.28725	0.000113463	0.00732922	1.10826	UP
XM_005696317.3	-1.95065	2.3827	-4.2872	0.000113479	0.00732922	1.05998	DOWN
XM_005700347.2	2.50621	0.437678	4.28421	0.000114522	0.0073783	1.16491	UP
XR_001295571.2	-0.844491	6.85283	-4.2826	0.000115087	0.00739648	0.896224	NOT
XM_005678507.3	-0.876842	1.52085	-4.28123	0.000115572	0.00740939	1.11003	NOT
XM_005699797.2	-0.789473	4.24923	-4.27934	0.000116242	0.00743405	0.936343	NOT
XM_005683176.3	0.813659	3.56204	4.27756	0.000116876	0.00745636	1.01008	NOT
XM_005698287.3	2.3245	0.55268	4.27628	0.000117336	0.00746745	1.14254	UP
MSTRG.3665.4	2.28702	0.297102	4.27185	0.000118937	0.0075241	1.13026	UP
MSTRG.7766.7	6.49213	7.48618	4.27158	0.000119034	0.0075241	0.875414	UP
XM_018067010.1	1.9867	1.94925	4.27142	0.000119092	0.0075241	1.11901	UP
MSTRG.15165.2	-1.57543	2.91917	-4.26906	0.000119957	0.00756046	0.966158	DOWN
MSTRG.4777.5	-2.31305	1.16239	-4.26786	0.000120398	0.00756997	1.07535	DOWN
XM_018060637.1	-0.948347	3.12554	-4.26449	0.000121642	0.00762984	0.923892	NOT
TRNAG-GCC_19	-2.25353	0.832549	-4.25838	0.000123936	0.00775507	1.05899	DOWN
XM_005692298.3	-0.873103	7.57185	-4.25696	0.000124476	0.00777023	0.8138	NOT
MSTRG.16493.5	-2.61254	-0.0649506	-4.25612	0.000124795	0.00777154	1.08601	DOWN
MSTRG.15753.1	2.44861	0.861097	4.25441	0.00012545	0.0077937	1.08321	UP
MSTRG.7259.3	-2.08991	-0.565727	-4.25308	0.000125959	0.00780214	1.07831	DOWN
XR_001919793.1	-2.49159	2.98468	-4.2525	0.000126183	0.00780214	0.857583	DOWN
XM_018063714.1	3.44494	3.59412	4.25016	0.000127089	0.00783955	1.0648	UP
XM_013969227.2	-0.910434	9.49247	-4.24839	0.000127779	0.00786351	0.777297	NOT
XM_013966434.2	2.48405	0.531958	4.24669	0.000128441	0.0078857	1.06407	UP
MSTRG.1621.3	-2.13074	1.54306	-4.23977	0.000131183	0.00802185	0.987124	DOWN
XM_005698378.3	2.18052	2.34411	4.23928	0.00013138	0.00802185	1.01942	UP
XR_001918698.1	-0.780096	1.74642	-4.23878	0.000131581	0.00802185	0.976797	NOT
XM_018054155.1	3.17048	1.95137	4.23623	0.00013261	0.0080657	1.03489	UP
MSTRG.15685.1	-1.25166	2.73074	-4.23164	0.00013448	0.00816041	0.872336	DOWN
XM_005693886.3	-0.878679	4.69616	-4.22851	0.000135769	0.00821672	0.777595	NOT
XM_005681109.3	-0.827409	4.2377	-4.22786	0.000136037	0.00821672	0.78357	NOT
XM_018046909.1	2.86568	2.97183	4.22597	0.000136825	0.00824523	0.982458	UP
MSTRG.2407.6	2.29024	-0.0818763	4.22399	0.000137651	0.00827586	0.999792	UP
XM_005681064.3	-0.812013	4.83198	-4.22147	0.000138712	0.00832051	0.74891	NOT
MSTRG.12.2	-1.44683	3.59213	-4.22063	0.00013907	0.00832285	0.769091	DOWN
XM_018057076.1	2.22511	1.78891	4.21888	0.000139814	0.00834819	0.965483	UP
XM_018048964.1	-1.26023	1.81705	-4.21352	0.000142118	0.00846641	0.895643	DOWN
XM_018041274.1	-0.91935	5.39311	-4.21271	0.000142468	0.00846791	0.708473	NOT
XM_018059657.1	2.67644	4.4282	4.21129	0.000143086	0.00848178	0.903576	UP
XM_018039339.1	-2.40758	3.20841	-4.21064	0.000143369	0.00848178	0.706236	DOWN
MSTRG.16951.3	1.7411	2.2652	4.20975	0.000143759	0.00848178	0.924785	UP
MSTRG.10449.8	-2.72296	0.319298	-4.20919	0.000144001	0.00848178	0.948384	DOWN
XM_018061885.1	-1.6212	1.1973	-4.20398	0.000146307	0.00859817	0.888966	DOWN
XM_018060388.1	2.7484	2.36845	4.19943	0.000148346	0.00865584	0.93382	UP
XM_018043256.1	4.67263	2.10893	4.1993	0.000148405	0.00865584	0.932232	UP
XM_018066650.1	2.32787	0.815911	4.19893	0.000148572	0.00865584	0.933003	UP
XM_018050654.1	-3.38778	-0.447128	-4.19851	0.000148762	0.00865584	0.919406	DOWN
XM_018057104.1	-0.930636	1.29581	-4.1981	0.000148947	0.00865584	0.889246	NOT
MSTRG.9254.1	-1.69636	0.695801	-4.19386	0.00015088	0.00873315	0.895928	DOWN
XM_018063733.1	3.42997	2.98755	4.19349	0.00015105	0.00873315	0.916756	UP
XM_005679207.3	1.42527	4.23182	4.19299	0.000151281	0.00873315	0.753069	UP
XM_018056759.1	-2.16099	1.42098	-4.19184	0.000151813	0.00874448	0.822827	DOWN
XM_018050190.1	2.93926	0.951844	4.18945	0.000152919	0.00878879	0.906729	UP
XM_018059449.1	0.691839	3.04958	4.18564	0.000154702	0.00883874	0.787436	NOT
XM_018043425.1	2.16852	1.60908	4.18551	0.000154761	0.00883874	0.857581	UP
XM_013972225.2	2.8267	3.846	4.18491	0.000155047	0.00883874	0.842655	UP
XM_005700340.3	0.911229	4.25347	4.18459	0.000155196	0.00883874	0.681895	NOT
XM_013968409.2	-0.922394	1.36807	-4.18399	0.000155482	0.00883874	0.838587	NOT
MSTRG.1787.3	-1.48441	0.981507	-4.18265	0.000156113	0.00885296	0.850015	DOWN
XM_005693669.3	-0.846296	4.63683	-4.18192	0.000156462	0.00885296	0.636217	NOT
XM_005700144.2	-1.22104	7.70473	-4.18131	0.00015675	0.00885296	0.592544	DOWN
XM_005675475.2	1.56227	0.446163	4.17904	0.000157838	0.00889515	0.876924	UP
MSTRG.857.2	-1.69798	0.883225	-4.17614	0.000159234	0.0089545	0.835898	DOWN
MSTRG.1377.1	-1.52394	1.36278	-4.17496	0.000159808	0.00896744	0.814476	DOWN
XM_018052117.1	2.70501	0.930331	4.17326	0.000160631	0.00899432	0.861532	UP
XM_005683637.3	-1.81978	1.32421	-4.17211	0.000161196	0.00899558	0.77919	DOWN
XM_018041625.1	1.34615	0.329606	4.17181	0.000161343	0.00899558	0.856234	UP
XM_018041305.1	2.55439	0.496169	4.17027	0.000162099	0.00901844	0.854308	UP
XM_018058607.1	-0.971564	1.10708	-4.16906	0.000162694	0.00903226	0.810453	NOT
MSTRG.16733.1	2.19359	2.34564	4.16774	0.000163348	0.00904413	0.833128	UP
MSTRG.1256.1	-2.2316	1.26122	-4.16683	0.000163799	0.00904413	0.706349	DOWN
XM_013965316.2	1.49937	0.289086	4.16654	0.000163947	0.00904413	0.842803	UP
XM_013963312.2	3.24426	2.82342	4.16471	0.000164858	0.00907518	0.834932	UP
XM_018059372.1	-2.95714	0.653669	-4.16312	0.000165659	0.00910009	0.817771	DOWN
XM_005676887.3	3.01775	5.56269	4.16193	0.000166258	0.00910281	0.727086	UP
MSTRG.5946.1	2.04273	0.789944	4.16163	0.000166406	0.00910281	0.830952	UP
XM_018049518.1	2.00638	0.405026	4.16079	0.00016683	0.00910681	0.828633	UP
XM_005693732.2	-1.16979	9.57529	-4.15939	0.000167541	0.00910681	0.517219	DOWN
MSTRG.17888.1	-1.60674	2.66163	-4.15925	0.000167615	0.00910681	0.673804	DOWN
XM_018058747.1	-2.20106	1.68595	-4.15874	0.000167876	0.00910681	0.731468	DOWN
XM_005684864.3	2.53853	1.13344	4.15762	0.000168447	0.00911883	0.819954	UP
XM_018040061.1	3.08076	0.27447	4.15556	0.000169503	0.009157	0.814723	UP
XM_018039340.1	3.98342	3.08462	4.15437	0.000170116	0.00915757	0.709854	UP
XM_018066551.1	-0.682388	5.73279	-4.15374	0.000170439	0.00915757	0.535664	NOT
TRNAD-GUC_23	-1.64557	0.465286	-4.1535	0.000170566	0.00915757	0.784086	DOWN
MSTRG.16288.1	-1.74364	1.69095	-4.15193	0.00017138	0.00918236	0.77758	DOWN
MSTRG.9342.2	-1.22645	1.54004	-4.15052	0.000172115	0.00920285	0.714581	DOWN
XM_005682147.2	2.92682	4.37766	4.14967	0.000172555	0.00920751	0.716822	UP
XM_018039822.1	-1.01975	3.10838	-4.14881	0.000173007	0.00921279	0.576111	DOWN
XM_018052728.1	-0.579614	4.10787	-4.14757	0.000173662	0.00922884	0.555835	NOT
XM_018067177.1	-0.71334	4.59379	-4.146	0.00017449	0.00925399	0.530801	NOT
XM_005699885.3	-0.921561	8.88763	-4.14399	0.000175552	0.00928569	0.476264	NOT
XM_005675553.3	2.86279	2.42079	4.13965	0.000177877	0.00928569	0.725621	UP
XM_018044024.1	1.28659	0.510643	4.13964	0.000177886	0.00928569	0.769144	UP
MSTRG.9388.2	2.1577	2.06961	4.13938	0.000178025	0.00928569	0.768546	UP
XM_018041278.1	2.50821	4.693	4.13907	0.000178194	0.00928569	0.66598	UP
XM_005693600.3	-1.11283	8.98639	-4.13887	0.000178301	0.00928569	0.460343	DOWN
XM_018057585.1	1.85512	2.54034	4.13868	0.000178402	0.00928569	0.723579	UP
XM_018059745.1	1.44691	2.42907	4.13853	0.000178484	0.00928569	0.709692	UP
XR_001918935.1	-1.73375	-0.0994231	-4.13752	0.000179033	0.00928569	0.764022	DOWN
MSTRG.9192.5	2.49812	0.067896	4.13674	0.000179456	0.00928569	0.763335	UP
MSTRG.6208.1	-3.27206	1.07195	-4.1366	0.000179529	0.00928569	0.7313	DOWN
MSTRG.1875.2	-1.27455	2.3129	-4.13627	0.00017971	0.00928569	0.670025	DOWN
XR_001296112.2	1.95877	0.592733	4.13552	0.000180117	0.00928569	0.760086	UP
XM_005697804.3	-0.741533	4.52198	-4.13528	0.000180249	0.00928569	0.500184	NOT
XM_018063194.1	2.02049	0.666686	4.13395	0.00018098	0.00928569	0.754851	UP
XM_005688565.3	2.53062	1.47631	4.13378	0.000181071	0.00928569	0.755357	UP
XM_018039532.1	2.59736	2.19755	4.13366	0.000181137	0.00928569	0.746043	UP
MSTRG.1987.1	4.0969	2.73264	4.13271	0.000181656	0.00929404	0.744648	UP
XM_005681371.3	2.98278	2.54851	4.13051	0.000182872	0.00933793	0.744077	UP
MSTRG.11599.1	4.26827	1.04806	4.1294	0.000183489	0.00933804	0.739946	UP
XM_005683993.3	-2.27218	0.834947	-4.12876	0.000183847	0.00933804	0.699447	DOWN
XM_018056583.1	2.12675	1.44656	4.12858	0.000183948	0.00933804	0.741294	UP
XM_018065035.1	2.89163	0.501265	4.12629	0.000185225	0.00938463	0.735242	UP
XM_018048734.1	1.79009	2.45891	4.12565	0.000185587	0.00938471	0.704131	UP
XM_018065138.1	1.75554	2.06193	4.12274	0.000187227	0.00944933	0.715221	UP
XM_018044802.1	2.41883	2.74806	4.12077	0.000188345	0.00947561	0.678638	UP
XM_018043526.1	-1.04127	5.03499	-4.12027	0.000188632	0.00947561	0.445878	DOWN
XM_018038788.1	-1.51913	3.36457	-4.11991	0.000188837	0.00947561	0.484373	DOWN
XM_018051739.1	2.18616	2.53219	4.1158	0.0001912	0.00953269	0.681416	UP
XM_005698578.3	1.31988	0.653942	4.11576	0.000191223	0.00953269	0.705955	UP
XM_013973709.2	-2.73916	-0.529301	-4.11576	0.000191225	0.00953269	0.688637	DOWN
XM_018040808.1	1.68559	3.04227	4.11494	0.000191695	0.00953269	0.626461	UP
XR_001917562.1	-1.84736	1.10105	-4.11476	0.000191801	0.00953269	0.653576	DOWN
MSTRG.13446.2	-1.73846	1.73557	-4.11393	0.000192285	0.0095386	0.580512	DOWN
MSTRG.13094.1	-2.56712	1.45538	-4.11092	0.000194044	0.00959392	0.601825	DOWN
XM_018049198.1	2.1714	0.171008	4.11076	0.000194136	0.00959392	0.692734	UP
XM_005684649.3	1.25333	1.19188	4.10719	0.000196243	0.00967972	0.681444	UP
XM_018066112.1	1.408	1.24529	4.10616	0.000196857	0.00968091	0.679084	UP
MSTRG.12622.2	-2.08929	-0.235889	-4.1059	0.000197009	0.00968091	0.675447	DOWN
XM_005675077.3	2.71666	2.77505	4.10518	0.000197437	0.00968369	0.674472	UP
XM_018047030.1	1.63647	1.09082	4.10374	0.000198301	0.0097078	0.645944	UP
XM_005678337.3	2.65442	-0.0569527	4.09835	0.000201557	0.00984838	0.659634	UP
XM_018060601.1	1.22532	1.82206	4.09714	0.000202297	0.00984838	0.616345	UP
XM_018038825.1	2.26303	0.95068	4.09713	0.000202304	0.00984838	0.656308	UP
XM_005695820.2	-1.18315	2.27668	-4.09376	0.000204374	0.00990061	0.519617	DOWN
MSTRG.16560.1	2.64697	0.0736937	4.09328	0.000204665	0.00990061	0.645957	UP
XR_001919568.1	-1.18927	7.59569	-4.09296	0.000204863	0.00990061	0.339307	DOWN
XM_005695007.2	-1.11705	9.66152	-4.09183	0.000205568	0.00990061	0.320779	DOWN
MSTRG.16729.11	1.70984	1.94008	4.0917	0.000205649	0.00990061	0.610502	UP
XM_018059395.1	-1.5838	0.861053	-4.09169	0.000205654	0.00990061	0.598148	DOWN
XM_018062174.1	2.6403	4.89853	4.09059	0.000206339	0.00991528	0.561307	UP
MSTRG.9537.1	2.73749	1.14628	4.089	0.00020733	0.00994461	0.632896	UP
XM_018038945.1	3.94183	3.80857	4.0865	0.0002089	0.00999071	0.619412	UP
XM_005692424.3	3.09238	2.8098	4.08618	0.000209105	0.00999071	0.62217	UP
XM_005697514.3	1.05852	2.39343	4.08565	0.00020944	0.00999071	0.575172	UP
MSTRG.17701.1	-2.43153	0.00738416	-4.08424	0.000210332	0.010015	0.612118	DOWN
MSTRG.4189.1	4.98923	7.40347	4.08204	0.000211731	0.0100509	0.306616	UP
XM_018056437.1	1.87289	1.64014	4.08184	0.000211857	0.0100509	0.612595	UP
MSTRG.8342.2	-1.84987	2.15143	-4.08019	0.000212916	0.0100784	0.481144	DOWN
XM_018051077.1	2.90419	0.627645	4.07974	0.000213209	0.0100784	0.608021	UP
XM_018055923.1	2.96515	0.220977	4.07702	0.00021496	0.0101205	0.601281	UP
XR_310211.2	-1.12088	3.30461	-4.07699	0.000214983	0.0101205	0.400742	DOWN
XM_018065489.1	1.47471	0.759846	4.07656	0.000215263	0.0101205	0.600227	UP
MSTRG.4404.3	2.88943	2.86901	4.07347	0.000217278	0.0101968	0.569709	UP
XM_018066911.1	-1.15661	8.66225	-4.07095	0.000218935	0.0102561	0.266619	DOWN
XM_018052369.1	0.680128	4.00537	4.06826	0.000220714	0.0103012	0.352976	NOT
MSTRG.8449.1	-1.76756	0.986682	-4.06792	0.000220945	0.0103012	0.53244	DOWN
MSTRG.8587.2	2.99589	0.345316	4.06771	0.00022108	0.0103012	0.576035	UP
XM_018043720.1	1.7035	3.62966	4.06615	0.000222121	0.010307	0.379926	UP
XM_018063615.1	-1.70891	3.13908	-4.06587	0.000222312	0.010307	0.363546	DOWN
XM_018050671.1	2.51029	0.897138	4.06504	0.000222872	0.010307	0.568927	UP
XM_018065038.1	2.05031	2.65486	4.06499	0.0002229	0.010307	0.534117	UP
XM_013972245.2	2.27537	1.28762	4.06457	0.000223181	0.010307	0.567147	UP
MSTRG.9009.1	0.851158	2.15144	4.06356	0.000223866	0.0103084	0.516962	NOT
MSTRG.5239.2	-2.73325	1.83831	-4.06336	0.000224002	0.0103084	0.450097	DOWN
MSTRG.2362.6	-1.34887	2.10631	-4.06195	0.000224952	0.0103339	0.397896	DOWN
XM_005699175.3	2.64301	2.64697	4.05929	0.000226766	0.010378	0.527248	UP
XM_013972148.2	-2.07919	0.636005	-4.0589	0.000227027	0.010378	0.500054	DOWN
MSTRG.3995.4	2.03547	1.29426	4.05879	0.000227104	0.010378	0.551987	UP
XM_018044211.1	2.17276	0.456826	4.05819	0.000227519	0.0103787	0.551348	UP
XM_018043823.1	-2.11823	-0.235469	-4.05663	0.000228588	0.0103928	0.541818	DOWN
XR_001917688.1	-1.68387	1.07667	-4.05631	0.00022881	0.0103928	0.469694	DOWN
XM_018057691.1	1.3747	3.81913	4.056	0.000229021	0.0103928	0.33873	UP
XM_005680660.3	-0.946664	6.34421	-4.05257	0.000231399	0.0104824	0.234346	NOT
XM_018057567.1	1.96663	2.11344	4.05174	0.000231978	0.0104905	0.502567	UP
XM_018066036.1	2.24821	-0.0725418	4.05101	0.000232487	0.0104953	0.532134	UP
XM_018057939.1	1.07431	5.65192	4.04959	0.000233482	0.010522	0.250811	UP
XM_018059508.1	-2.41835	0.075684	-4.04855	0.000234214	0.0105368	0.515941	DOWN
MSTRG.16821.1	-2.27142	0.198141	-4.04732	0.000235084	0.0105578	0.507863	DOWN
XM_018066289.1	3.08759	0.848796	4.04511	0.000236656	0.0106101	0.510882	UP
XM_005685483.2	1.28681	0.433426	4.04404	0.000237416	0.0106168	0.512842	UP
XM_018042692.1	1.42665	1.17795	4.04375	0.000237621	0.0106168	0.50835	UP
XR_001297233.2	-1.15113	0.749948	-4.04185	0.000238985	0.0106386	0.471634	DOWN
MSTRG.17186.1	2.20886	0.770939	4.0413	0.000239381	0.0106386	0.506085	UP
XM_018042786.1	4.11122	2.17355	4.041	0.000239597	0.0106386	0.502847	UP
XM_013973806.2	-1.27554	0.779053	-4.04025	0.000240141	0.0106386	0.474565	DOWN
XM_018053193.1	1.85305	0.410313	4.03943	0.000240729	0.0106386	0.500707	UP
XM_018049419.1	1.8666	0.762691	4.0392	0.000240896	0.0106386	0.500443	UP
XM_018062402.1	2.46242	0.101384	4.03866	0.000241289	0.0106386	0.498973	UP
XM_018039661.1	2.54318	1.12711	4.03802	0.000241753	0.0106386	0.495903	UP
MSTRG.4265.1	1.81418	1.39238	4.03799	0.000241778	0.0106386	0.402631	UP
TRNAG-UCC_68	-2.38882	-0.844416	-4.03741	0.000242198	0.0106392	0.488724	DOWN
XM_005682506.3	-1.20045	4.02504	-4.03488	0.000244046	0.0107023	0.219443	DOWN
MSTRG.3614.19	-1.99203	-0.613824	-4.03263	0.000245701	0.0107399	0.475941	DOWN
XM_005680983.3	1.11109	1.61909	4.0322	0.000246019	0.0107399	0.468894	UP
XM_018050366.1	2.26637	0.0328618	4.03067	0.000247156	0.0107399	0.477607	UP
MSTRG.16171.9	-1.88425	-0.593634	-4.03047	0.000247306	0.0107399	0.475758	DOWN
MSTRG.8160.2	-0.902915	1.68085	-4.03001	0.000247647	0.0107399	0.386467	NOT
XM_013963417.2	-0.970236	0.747304	-4.03	0.000247652	0.0107399	0.45318	NOT
XM_018059172.1	2.73553	0.259784	4.02983	0.000247783	0.0107399	0.475071	UP
XM_005683751.3	-1.72522	1.20416	-4.02824	0.000248966	0.0107633	0.355137	DOWN
XM_005689234.3	-2.39281	0.109029	-4.028	0.000249149	0.0107633	0.455269	DOWN
XM_005688088.3	-0.808378	3.13999	-4.0266	0.000250198	0.0107712	0.25598	NOT
MSTRG.10165.1	2.46226	0.312036	4.02616	0.000250524	0.0107712	0.46546	UP
TRNAD-GUC_6	-2.12703	0.764464	-4.02513	0.000251304	0.0107712	0.401145	DOWN
XM_018062650.1	2.29547	0.000570525	4.02452	0.000251764	0.0107712	0.461139	UP
XM_005689530.3	2.4952	1.66585	4.02444	0.000251823	0.0107712	0.457492	UP
MSTRG.4945.3	-3.06639	2.56082	-4.0243	0.000251928	0.0107712	0.309632	DOWN
MSTRG.16873.1	1.44152	0.904805	4.02305	0.000252881	0.0107712	0.456731	UP
MSTRG.9357.3	2.1409	-0.119332	4.02242	0.000253358	0.0107712	0.455538	UP
XM_018053969.1	2.84721	1.69364	4.02176	0.000253862	0.0107712	0.449729	UP
MSTRG.5758.1	2.18644	1.65048	4.02175	0.000253865	0.0107712	0.452205	UP
MSTRG.17137.9	-2.11597	-0.13636	-4.02174	0.000253872	0.0107712	0.440103	DOWN
XM_018042471.1	2.29935	0.382925	4.01967	0.00025546	0.0107985	0.445746	UP
MSTRG.10007.1	2.38297	0.31659	4.01904	0.000255945	0.0107985	0.446415	UP
MSTRG.4480.9	1.96044	0.627097	4.0185	0.000256358	0.0107985	0.444864	UP
XM_018038733.1	4.13217	3.22398	4.01797	0.000256768	0.0107985	0.424538	UP
XM_018050302.1	2.38712	2.59269	4.01753	0.000257107	0.0107985	0.429256	UP
MSTRG.9357.1	-1.89858	0.459688	-4.01644	0.000257946	0.0107985	0.423317	DOWN
XR_001919591.1	2.8086	1.82314	4.01634	0.000258026	0.0107985	0.435954	UP
NM_001285690.1	0.68178	5.11009	4.01629	0.000258061	0.0107985	0.173798	NOT
XM_018053115.1	2.41686	0.422434	4.01606	0.00025824	0.0107985	0.438433	UP
XM_018065135.1	3.92671	0.653835	4.01104	0.00026216	0.0109449	0.422392	UP
XR_001917163.1	-1.89598	0.966777	-4.00895	0.000263813	0.0109963	0.331322	DOWN
XM_013972616.2	-1.30576	4.29387	-4.0079	0.00026464	0.0110132	0.145473	DOWN
XM_005698539.3	2.41925	2.07512	4.00645	0.000265801	0.0110414	0.381881	UP
XM_005687157.3	-1.02475	9.21367	-4.00562	0.000266457	0.0110414	0.0770592	DOWN
XM_018045258.1	-1.27736	0.407724	-4.00499	0.000266966	0.0110414	0.382006	DOWN
XM_018057614.1	2.59473	5.02938	4.00463	0.000267252	0.0110414	0.191197	UP
MSTRG.2666.2	5.32797	4.05375	4.0044	0.000267435	0.0110414	0.381992	UP
XM_005689517.3	2.97096	0.394307	4.00276	0.000268752	0.0110783	0.399753	UP
XM_018054887.1	1.99531	3.12331	4.00005	0.000270949	0.0111512	0.334257	UP
XM_018057443.1	-1.10368	3.8368	-3.99862	0.00027211	0.0111792	0.156723	DOWN
TRNAG-CCC_17	-1.36574	-0.891814	-3.99816	0.000272485	0.0111792	0.390667	DOWN
TRNAY-GUA_15	-1.9479	-0.576087	-3.997	0.000273434	0.0111932	0.379178	DOWN
MSTRG.13642.1	1.77784	1.79394	3.9967	0.000273685	0.0111932	0.347266	UP
XM_018043896.1	1.84744	2.36796	3.99597	0.000274279	0.0111999	0.320346	UP
XM_018043705.1	2.22334	1.79005	3.99428	0.000275677	0.0112304	0.378897	UP
XM_018045299.1	1.92902	0.994002	3.99402	0.000275887	0.0112304	0.378241	UP
MSTRG.2680.3	2.27816	-0.0467827	3.99299	0.000276741	0.0112325	0.3761	UP
XM_005701640.3	3.08977	2.61262	3.99264	0.00027703	0.0112325	0.372143	UP
XR_001296120.2	-0.849472	3.30905	-3.9924	0.000277228	0.0112325	0.142226	NOT
XM_018040107.1	1.9624	1.30797	3.98869	0.000280333	0.0113407	0.359648	UP
XR_001296830.2	-1.27615	2.09913	-3.9851	0.000283359	0.0114316	0.165613	DOWN
MSTRG.7933.3	-2.12781	-0.0716378	-3.98499	0.000283456	0.0114316	0.340063	DOWN
MSTRG.17914.1	-2.20392	-0.448288	-3.98339	0.000284817	0.0114687	0.344944	DOWN
XM_013966140.2	2.49711	4.00087	3.98121	0.00028668	0.0115102	0.198547	UP
MSTRG.4010.1	2.93012	2.40681	3.98057	0.00028723	0.0115102	0.338247	UP
XM_018043418.1	1.1941	0.320973	3.98001	0.000287707	0.0115102	0.342284	UP
MSTRG.17555.1	1.53084	0.714656	3.97951	0.000288139	0.0115102	0.340754	UP
XM_013973872.2	-1.97152	1.72983	-3.97914	0.000288459	0.0115102	0.189799	DOWN
NM_001314342.1	-4.26109	2.47511	-3.9791	0.000288494	0.0115102	0.223204	DOWN
XM_018048383.1	1.36077	2.93817	3.97676	0.000290519	0.0115733	0.251247	UP
MSTRG.1126.1	-3.54522	1.57698	-3.97539	0.000291717	0.011588	0.172579	DOWN
XM_018040526.1	3.05703	1.94143	3.9751	0.000291969	0.011588	0.323019	UP
MSTRG.4929.2	-3.48104	0.499111	-3.9742	0.000292758	0.011588	0.279446	DOWN
MSTRG.10674.3	3.82511	2.31484	3.97412	0.000292829	0.011588	0.238788	UP
XM_018044803.1	1.77262	4.84729	3.9738	0.000293109	0.011588	0.0763686	UP
MSTRG.10063.3	-2.07193	0.233798	-3.97325	0.000293586	0.0115893	0.311322	DOWN
MSTRG.8178.4	1.91133	2.20424	3.97223	0.000294483	0.0116072	0.268378	UP
MSTRG.2702.6	1.82372	1.33073	3.96801	0.000298222	0.011734	0.304572	UP
XM_018066279.1	-1.50583	0.700684	-3.967	0.00029913	0.011734	0.267335	DOWN
XM_018050438.1	-1.23631	8.8179	-3.96593	0.00030009	0.011734	-0.0341205	DOWN
MSTRG.10420.1	2.6657	0.231307	3.96574	0.000300261	0.011734	0.303613	UP
XM_005680937.3	-1.64371	1.03713	-3.96559	0.000300387	0.011734	0.201421	DOWN
MSTRG.3279.6	-2.07644	2.92538	-3.96415	0.000301688	0.011734	0.0631713	DOWN
MSTRG.7515.5	2.70527	1.02612	3.96338	0.000302383	0.011734	0.290167	UP
XM_018053687.1	-2.34918	3.67248	-3.96272	0.000302981	0.011734	0.0135224	DOWN
MSTRG.9336.3	2.238	1.04413	3.96263	0.000303058	0.011734	0.294092	UP
MSTRG.8012.1	-4.94997	0.715641	-3.96256	0.000303121	0.011734	0.224342	DOWN
XM_005698729.2	-1.47975	3.90797	-3.96228	0.00030338	0.011734	0.00983398	DOWN
XM_018062730.1	4.59848	2.35275	3.9622	0.000303449	0.011734	0.287271	UP
XM_005688873.3	-1.91069	0.975946	-3.96209	0.000303547	0.011734	0.143971	DOWN
XM_013969454.2	-1.34646	3.56023	-3.96112	0.000304429	0.0117498	0.0378447	DOWN
XM_005685625.2	-1.08406	10.3133	-3.96021	0.000305263	0.0117498	-0.0582169	DOWN
XM_005684246.3	-0.838692	3.53445	-3.96006	0.000305394	0.0117498	0.0453196	NOT
XM_018056686.1	0.960558	3.94718	3.95967	0.000305757	0.0117498	0.0671443	NOT
XM_018057594.1	-3.50926	1.19104	-3.95714	0.000308068	0.0118062	0.214195	DOWN
MSTRG.14339.5	-2.08302	0.96159	-3.95708	0.00030813	0.0118062	0.18973	DOWN
XM_018061243.1	2.36766	0.697407	3.95617	0.000308962	0.0118119	0.274776	UP
MSTRG.5492.1	-1.7323	1.49132	-3.95594	0.000309183	0.0118119	0.140027	DOWN
XM_018041906.1	3.07645	3.04068	3.95543	0.000309648	0.0118123	0.208943	UP
XM_018059371.1	-1.09409	2.81267	-3.95452	0.000310491	0.011824	0.0311208	DOWN
XR_001296686.2	-1.83999	4.85237	-3.95412	0.00031086	0.011824	-0.0193749	DOWN
XM_018049131.1	7.1947	4.1567	3.95139	0.00031341	0.0118575	0.137152	UP
XM_005694938.3	-0.715382	3.40317	-3.95125	0.000313538	0.0118575	0.0436753	NOT
XM_018044784.1	1.82171	1.69995	3.95125	0.000313544	0.0118575	0.263409	UP
XM_013964480.2	1.34199	1.3217	3.95123	0.000313557	0.0118575	0.258857	UP
MSTRG.15577.1	2.71834	1.08615	3.94963	0.000315063	0.0118972	0.250576	UP
XM_013968196.2	-1.87433	0.664924	-3.94698	0.000317561	0.0119458	0.218608	DOWN
XM_018060749.1	-0.665018	6.70534	-3.94673	0.000317804	0.0119458	-0.0727774	NOT
XM_005692574.3	-0.901601	9.46316	-3.94643	0.000318083	0.0119458	-0.0926287	NOT
XM_018043657.1	-1.93407	1.1562	-3.94632	0.000318184	0.0119458	0.183466	DOWN
XM_013963496.2	2.00377	1.9038	3.94557	0.000318902	0.0119556	0.144184	UP
XM_018047012.1	2.9923	0.652778	3.94304	0.000321317	0.0120071	0.242409	UP
XM_018056745.1	2.70174	3.4069	3.94291	0.000321447	0.0120071	0.151624	UP
MSTRG.16429.1	-2.0326	2.43442	-3.94269	0.000321657	0.0120071	0.0632058	DOWN
XM_005685681.3	-0.625622	5.76625	-3.94167	0.000322637	0.0120265	-0.0748054	NOT
XM_018062655.1	2.01777	2.09491	3.94052	0.00032374	0.0120504	0.209916	UP
MSTRG.5107.1	2.34066	2.85949	3.93966	0.000324576	0.0120643	0.185443	UP
XM_018040152.1	-0.805334	6.8087	-3.93917	0.000325053	0.0120649	-0.0946378	NOT
XM_013963957.2	-0.941913	9.20509	-3.93823	0.00032596	0.0120814	-0.115305	NOT
MSTRG.17618.1	-1.71476	1.86926	-3.93694	0.00032722	0.0121109	0.128649	DOWN
XM_018042302.1	0.735042	5.71048	3.93501	0.000329102	0.0121585	-0.0820803	NOT
XM_018050159.1	1.46332	9.47875	3.93467	0.00032944	0.0121585	-0.115498	UP
XM_018047366.1	2.22328	2.72243	3.93416	0.000329945	0.01216	0.207053	UP
XM_018065841.1	1.98742	2.79949	3.93307	0.000331017	0.0121823	0.146517	UP
XM_018059236.1	-0.764449	1.35522	-3.93218	0.000331896	0.0121833	0.15116	NOT
XM_018060594.1	1.30392	4.84978	3.93199	0.000332081	0.0121833	-0.028558	UP
XM_018038514.1	-2.20014	0.52676	-3.93162	0.000332446	0.0121833	0.117025	DOWN
XM_005691155.3	-2.27577	1.4941	-3.9309	0.000333162	0.0121924	0.0801092	DOWN
XM_005684252.3	2.33919	0.145732	3.92984	0.000334218	0.0122139	0.208688	UP
TRNAE-CUC_7	-1.92835	0.499184	-3.92883	0.000335229	0.0122337	0.155884	DOWN
XM_005689697.2	-1.06382	8.70842	-3.92493	0.00033914	0.0123592	-0.151263	DOWN
MSTRG.3173.5	3.00049	0.353358	3.92265	0.000341454	0.0124261	0.188078	UP
XM_005692023.3	1.82328	1.62812	3.92102	0.000343113	0.0124692	0.178809	UP
XM_018045371.1	-1.1509	4.07777	-3.92035	0.000343799	0.0124767	-0.0868874	DOWN
XM_018056283.1	2.01993	1.54338	3.91943	0.000344744	0.0124936	0.177791	UP
MSTRG.8302.15	3.32895	0.755573	3.91859	0.000345607	0.0125075	0.176308	UP
XM_018042109.1	1.49351	1.93879	3.91735	0.000346881	0.0125298	0.141189	UP
XM_018052956.1	-2.57195	2.00027	-3.91706	0.000347184	0.0125298	-0.0202254	DOWN
XM_013964561.2	2.75485	2.16794	3.91612	0.00034816	0.0125477	0.165919	UP
MSTRG.10450.1	0.713453	3.18203	3.91555	0.00034875	0.0125478	-0.0252758	NOT
NM_001285559.1	-0.760512	8.28992	-3.91519	0.000349124	0.0125478	-0.175498	NOT
XM_018051459.1	1.90923	3.54434	3.91383	0.00035054	0.0125731	0.0319615	UP
MSTRG.10699.1	-1.54735	1.35285	-3.91316	0.000351242	0.0125731	0.0117287	DOWN
XM_018043152.1	2.19562	2.33912	3.91313	0.000351274	0.0125731	0.12768	UP
XM_005691360.3	-0.766497	2.40951	-3.91082	0.000353689	0.0126422	-0.00589707	NOT
MSTRG.5016.15	-4.30647	0.155611	-3.90738	0.000357328	0.0127441	0.0701832	DOWN
XM_018063388.1	2.84277	1.90636	3.9072	0.000357517	0.0127441	0.145531	UP
XM_018051870.1	-0.8559	4.5435	-3.9066	0.000358158	0.0127495	-0.145366	NOT
XM_018062236.1	2.42011	-0.106248	3.90583	0.000358983	0.0127615	0.144847	UP
MSTRG.17811.1	-1.2583	1.84749	-3.90486	0.000360016	0.0127707	0.0220503	DOWN
XM_005695611.3	0.810329	1.82979	3.90467	0.000360219	0.0127707	0.0973417	NOT
XM_018067059.1	2.46287	2.93795	3.90121	0.00036395	0.0128721	0.0677699	UP
XR_001917084.1	1.05104	4.14732	3.9011	0.000364066	0.0128721	-0.107433	UP
MSTRG.1589.1	-0.922234	1.70358	-3.89914	0.000366197	0.0129144	0.028675	NOT
XM_018042478.1	1.76677	1.08335	3.89908	0.000366255	0.0129144	0.120033	UP
XM_018049856.1	2.90779	0.323318	3.89731	0.000368191	0.01295	0.118961	UP
XM_005677468.3	-2.76043	6.92963	-3.89725	0.000368256	0.01295	-0.219465	DOWN
XM_018057024.1	1.31502	0.827794	3.89663	0.000368934	0.0129564	0.106328	UP
XM_018041592.1	1.86636	0.405782	3.89178	0.000374291	0.0131268	0.107638	UP
XM_005695838.3	-2.82126	-0.120951	-3.89112	0.000375028	0.013135	0.0865798	DOWN
XM_018063820.1	-1.16937	1.81442	-3.8901	0.000376163	0.0131571	-0.0381543	DOWN
XM_018046953.1	1.9148	0.74867	3.88877	0.000377648	0.0131914	0.0965639	UP
XM_005694630.3	-0.978184	1.75933	-3.88827	0.000378218	0.013193	-0.0016972	NOT
XM_018052184.1	2.03728	2.47178	3.88755	0.000379026	0.013193	0.0752348	UP
XM_018066974.1	-2.30656	-0.205742	-3.88671	0.000379968	0.013193	0.0779695	DOWN
XM_018059678.1	-2.13646	0.734771	-3.88663	0.000380062	0.013193	0.0341299	DOWN
MSTRG.1252.2	-1.82596	-0.617666	-3.88624	0.000380498	0.013193	0.0815929	DOWN
TRNAD-GUC_2	-1.88458	0.224692	-3.88542	0.000381424	0.013193	0.0500506	DOWN
XM_018057874.1	2.57034	3.83069	3.88534	0.000381519	0.013193	-0.0157256	UP
XM_005685626.2	-1.07616	8.99563	-3.88514	0.00038174	0.013193	-0.265255	DOWN
XM_018043634.1	1.68193	0.33644	3.88327	0.00038387	0.0132491	0.0828694	UP
MSTRG.14497.5	-2.28007	-0.371098	-3.88197	0.000385347	0.0132825	0.0713341	DOWN
XM_018060877.1	3.11527	2.38691	3.87716	0.000390895	0.013456	0.0590521	UP
XM_018057347.1	2.30395	2.36022	3.87584	0.000392422	0.0134735	-0.00270169	UP
XR_001297015.2	-2.07901	3.79821	-3.87554	0.000392771	0.0134735	-0.20112	DOWN
XM_018062822.1	3.04293	1.59092	3.87506	0.000393335	0.0134735	0.0482943	UP
XM_018063387.1	2.22119	3.03946	3.87494	0.000393476	0.0134735	0.0191992	UP
MSTRG.2857.9	-2.35602	-0.268054	-3.87432	0.000394204	0.0134735	0.0372677	DOWN
XM_018062091.1	2.27819	1.96375	3.87365	0.000394983	0.0134735	0.0539667	UP
MSTRG.9089.1	-4.51165	0.941786	-3.87362	0.000395019	0.0134735	-0.0141906	DOWN
MSTRG.13791.3	-2.65531	-0.00119853	-3.87091	0.000398202	0.0135643	0.0311303	DOWN
MSTRG.6393.1	-2.36952	-0.602359	-3.8702	0.00039905	0.0135723	0.0207506	DOWN
MSTRG.8392.3	-0.786421	1.88885	-3.86983	0.000399476	0.0135723	-0.0883545	NOT
MSTRG.70.1	3.39894	9.18621	3.86915	0.000400283	0.013582	-0.302052	UP
MSTRG.10038.2	2.90786	0.672125	3.8686	0.000400944	0.0135843	0.0383113	UP
XR_001918557.1	1.22178	1.74854	3.86822	0.000401391	0.0135843	0.00975044	UP
XM_018045506.1	-2.87608	0.496086	-3.86407	0.000406357	0.013734	-0.0439857	DOWN
XM_018048626.1	1.31167	1.46093	3.86344	0.000407116	0.013734	-0.00259434	UP
XM_005693901.3	1.92513	2.12943	3.86321	0.000407393	0.013734	0.0115762	UP
XR_001918214.1	-1.73753	4.27105	-3.86074	0.000410391	0.0138172	-0.266788	DOWN
MSTRG.12283.2	-1.15229	1.74304	-3.8598	0.000411533	0.0138378	-0.0742302	DOWN
XM_018060402.1	3.63853	0.745591	3.8593	0.000412148	0.0138406	0.0176195	UP
XM_018057812.1	2.59929	0.527724	3.85756	0.000414274	0.0138941	0.0167383	UP
XM_018047543.1	2.28941	0.173636	3.85421	0.0004184	0.0140145	0.0042146	UP
NM_001314314.1	-0.887201	8.74271	-3.85208	0.000421051	0.0140852	-0.355837	NOT
XM_018065040.1	-2.09947	1.70675	-3.85115	0.000422213	0.014106	-0.127018	DOWN
MSTRG.16413.1	-2.03751	2.02177	-3.84967	0.000424067	0.0141498	-0.14281	DOWN
XM_018044801.1	-1.75004	1.89032	-3.84846	0.000425578	0.0141672	-0.188035	DOWN
XR_001297072.2	-2.56908	5.36682	-3.84839	0.000425673	0.0141672	-0.330543	DOWN
MSTRG.4864.3	-2.48529	1.22028	-3.84732	0.000427021	0.014194	-0.133561	DOWN
XR_001918493.1	-0.967708	4.10216	-3.8459	0.000428818	0.0142356	-0.301819	NOT
XM_013968623.2	-1.02264	1.96981	-3.8438	0.000431489	0.014306	-0.140808	DOWN
XM_018061391.1	2.37399	-0.0691329	3.84227	0.000433445	0.0143526	-0.0228083	UP
XM_005696669.3	-1.36808	2.27584	-3.84097	0.000435111	0.0143716	-0.217659	DOWN
MSTRG.10591.1	-1.22576	0.67962	-3.84097	0.000435118	0.0143716	-0.0624916	DOWN
MSTRG.7327.5	2.97714	0.593691	3.84049	0.00043574	0.0143739	-0.0389167	UP
XM_013973941.2	2.89204	0.315559	3.83969	0.000436762	0.0143894	-0.0313603	UP
XM_018061763.1	1.21722	4.16276	3.83913	0.000437495	0.0143954	-0.281911	UP
XM_018038839.1	1.83729	0.678995	3.8378	0.000439209	0.0144306	-0.0346197	UP
XM_005686334.3	1.74758	0.653245	3.83731	0.000439854	0.0144306	-0.0355588	UP
MSTRG.8318.8	-2.45345	2.02424	-3.83647	0.000440941	0.0144306	-0.172883	DOWN
MSTRG.9629.10	-0.922331	2.80506	-3.83604	0.000441506	0.0144306	-0.210131	NOT
MSTRG.897.4	-2.25435	-0.128612	-3.83592	0.00044166	0.0144306	-0.0605092	DOWN
XM_005685227.3	1.51831	2.73388	3.83518	0.000442622	0.0144306	-0.120256	UP
XM_018054045.1	4.33154	3.28812	3.83486	0.000443052	0.0144306	-0.0711275	UP
XM_018061250.1	2.12609	0.121994	3.83463	0.000443345	0.0144306	-0.0419868	UP
XM_018063757.1	3.32353	1.02567	3.83386	0.000444353	0.0144306	-0.0484095	UP
XM_005691488.3	2.29106	3.40102	3.83367	0.000444609	0.0144306	-0.100643	UP
XM_013974816.2	1.26114	1.30453	3.83364	0.000444647	0.0144306	-0.0607464	UP
MSTRG.17721.1	-1.85566	-0.591978	-3.83193	0.000446896	0.0144855	-0.0622971	DOWN
XR_001918584.1	-1.5321	0.73682	-3.82934	0.000450326	0.0145372	-0.108315	DOWN
XM_018064322.1	2.04335	1.24686	3.82924	0.000450469	0.0145372	-0.0641796	UP
XM_005680826.3	1.66968	0.819909	3.82918	0.000450549	0.0145372	-0.0547029	UP
XM_018040066.1	-0.712619	4.60358	-3.82898	0.000450814	0.0145372	-0.360021	NOT
XM_018044340.1	3.13102	3.66544	3.82863	0.000451276	0.0145372	-0.168762	UP
MSTRG.3521.4	-2.01168	-0.431624	-3.827	0.000453457	0.0145895	-0.0801986	DOWN
XM_018066509.1	1.44199	5.74734	3.82631	0.000454374	0.0146009	-0.36187	UP
MSTRG.2755.1	-0.819592	2.12417	-3.82488	0.000456305	0.0146319	-0.201582	NOT
XM_018055847.1	-2.74649	1.91887	-3.82476	0.000456457	0.0146319	-0.325244	DOWN
MSTRG.17592.7	-2.37068	-0.607463	-3.8241	0.000457352	0.0146426	-0.0846854	DOWN
XM_018054775.1	-0.849039	2.08628	-3.82304	0.000458781	0.014655	-0.232727	NOT
XM_018065462.1	1.26047	1.99683	3.8223	0.000459793	0.014655	-0.129207	UP
XM_018043858.1	1.16415	1.33269	3.82219	0.000459937	0.014655	-0.100535	UP
MSTRG.8122.4	-2.55506	0.668276	-3.82215	0.000459987	0.014655	-0.123053	DOWN
XM_018038967.1	2.28559	0.854023	3.82083	0.000461792	0.0146936	-0.0852141	UP
XM_018060416.1	1.03921	1.82685	3.82029	0.000462526	0.0146936	-0.139381	UP
XM_018058821.1	3.72039	2.17967	3.82002	0.000462888	0.0146936	-0.0989236	UP
MSTRG.14721.17	3.40521	0.350912	3.81807	0.000465569	0.0147608	-0.100968	UP
XR_001297196.2	-0.981599	2.48303	-3.8161	0.000468274	0.0148285	-0.321724	NOT
MSTRG.4267.9	-2.07531	-0.117014	-3.81537	0.000469283	0.0148424	-0.123643	DOWN
XM_018045558.1	3.75102	6.74702	3.81322	0.000472275	0.014919	-0.368329	UP
MSTRG.13889.2	2.17157	0.111109	3.81231	0.000473542	0.0149409	-0.100685	UP
XM_013975232.2	-1.2318	0.980611	-3.81123	0.000475047	0.0149522	-0.153744	DOWN
MSTRG.16191.1	-4.42331	1.20772	-3.81109	0.00047525	0.0149522	-0.191331	DOWN
XM_018057994.1	2.81028	3.14815	3.81077	0.000475702	0.0149522	-0.178571	UP
MSTRG.13196.9	3.22856	3.13521	3.81042	0.000476192	0.0149522	-0.171249	UP
MSTRG.3854.1	-1.96605	-0.0441391	-3.80964	0.000477278	0.0149683	-0.121111	DOWN
XM_018066481.1	3.34717	2.69123	3.80889	0.000478345	0.0149837	-0.127553	UP
MSTRG.8583.10	-1.92015	3.16834	-3.80624	0.000482093	0.015083	-0.37879	DOWN
MSTRG.9548.1	-2.05534	-0.125472	-3.80339	0.000486163	0.0151922	-0.188331	DOWN
XM_005696141.3	-0.898781	5.56384	-3.80291	0.00048684	0.0151951	-0.459358	NOT
XM_018049135.1	3.16384	3.08549	3.80249	0.000487448	0.0151959	-0.21317	UP
XM_018055389.1	-0.913396	9.9649	-3.80116	0.000489359	0.0152315	-0.503408	NOT
XM_018058032.1	-2.46418	0.841258	-3.80032	0.000490579	0.0152315	-0.207661	DOWN
MSTRG.4262.1	-1.03679	4.58225	-3.79987	0.000491228	0.0152315	-0.449909	DOWN
MSTRG.2702.10	2.97413	1.31392	3.79967	0.000491519	0.0152315	-0.137014	UP
XM_005683026.3	-1.03072	2.50165	-3.79922	0.000492164	0.0152315	-0.307345	DOWN
XM_018051881.1	-1.31567	2.0154	-3.79895	0.000492558	0.0152315	-0.304591	DOWN
MSTRG.13415.5	2.92855	0.934578	3.79887	0.000492674	0.0152315	-0.154274	UP
XM_018039820.1	1.78928	0.748905	3.7974	0.000494805	0.0152792	-0.150303	UP
XM_018043546.1	2.49323	3.42306	3.79478	0.00049864	0.0153794	-0.2259	UP
XM_005680923.3	-2.19957	1.8481	-3.79304	0.000501199	0.0154401	-0.325708	DOWN
XM_018042354.1	2.94676	1.82057	3.79251	0.00050199	0.0154463	-0.162385	UP
MSTRG.8620.6	-1.76299	-0.442685	-3.79031	0.000505249	0.015523	-0.170652	DOWN
XM_005679491.3	-3.43956	0.468844	-3.79002	0.000505673	0.015523	-0.250676	DOWN
XR_001918389.1	-1.45822	1.98904	-3.78913	0.000507008	0.0155258	-0.348533	DOWN
XM_005698396.3	-0.797171	6.27098	-3.78903	0.000507154	0.0155258	-0.511471	NOT
XM_018050510.1	3.09583	1.68273	3.78876	0.00050755	0.0155258	-0.166171	UP
MSTRG.143.5	-1.76318	-0.715478	-3.78835	0.000508168	0.0155265	-0.166543	DOWN
MSTRG.4769.3	2.43298	2.54674	3.78794	0.000508776	0.0155269	-0.26678	UP
MSTRG.8359.3	-2.26116	-0.0643295	-3.78718	0.000509923	0.0155437	-0.201144	DOWN
MSTRG.3866.1	2.05165	0.185911	3.78677	0.000510538	0.0155443	-0.166883	UP
XM_018050499.1	-1.385	4.13408	-3.78626	0.000511308	0.0155496	-0.472584	DOWN
XM_018062502.1	-0.766074	6.78861	-3.7854	0.000512599	0.0155574	-0.526553	NOT
XM_018041055.1	1.65356	1.47666	3.78529	0.000512757	0.0155574	-0.178	UP
TRNAE-CUC_46	-1.71478	0.429634	-3.78339	0.000515634	0.0156265	-0.232003	DOWN
MSTRG.14130.1	-2.54437	0.828999	-3.78213	0.000517552	0.0156542	-0.2257	DOWN
XM_018059502.1	2.40781	2.97385	3.782	0.000517749	0.0156542	-0.258082	UP
MSTRG.9152.1	-2.27211	2.54772	-3.7803	0.000520339	0.0157143	-0.341979	DOWN
MSTRG.16752.2	2.18156	-0.216928	3.77871	0.000522783	0.0157699	-0.188556	UP
XR_001296050.2	-1.04631	4.42353	-3.77675	0.000525796	0.0158425	-0.513435	DOWN
XM_005680663.3	1.38327	1.30346	3.77561	0.00052757	0.0158776	-0.201773	UP
XR_001917130.1	2.61021	0.356666	3.77357	0.000530733	0.0159364	-0.203884	UP
XM_018062017.1	2.31634	2.12448	3.77357	0.000530745	0.0159364	-0.208676	UP
MSTRG.1800.1	-1.35311	1.37624	-3.77315	0.000531393	0.0159375	-0.366564	DOWN
XM_018055239.1	-1.39179	1.12645	-3.77124	0.000534385	0.0159957	-0.302661	DOWN
XM_018050980.1	2.49612	0.305908	3.77113	0.000534559	0.0159957	-0.209793	UP
XM_018058525.1	2.24085	2.65621	3.77003	0.000536293	0.0160166	-0.231817	UP
XM_018038775.1	3.32623	4.47413	3.76971	0.00053679	0.0160166	-0.322936	UP
MSTRG.10395.3	-2.50283	0.278237	-3.76918	0.000537625	0.0160166	-0.251843	DOWN
MSTRG.15407.1	-2.0558	0.0896542	-3.7688	0.000538226	0.0160166	-0.245552	DOWN
XM_005683453.3	1.02454	3.29653	3.76874	0.000538326	0.0160166	-0.340659	UP
XM_018066242.1	-0.942361	0.688957	-3.76593	0.000542775	0.0161124	-0.264519	NOT
MSTRG.6810.2	1.6549	1.02506	3.76593	0.000542783	0.0161124	-0.22372	UP
XM_018046898.1	2.57027	0.643319	3.76417	0.000545594	0.0161775	-0.228278	UP
XR_001297262.2	-2.16646	0.413348	-3.76356	0.000546571	0.016188	-0.254731	DOWN
MSTRG.17564.1	-1.646	1.94426	-3.76241	0.000548426	0.0162246	-0.361919	DOWN
XM_005681763.3	2.3879	0.936961	3.76002	0.000552276	0.016319	-0.238279	UP
MSTRG.9003.1	-2.15827	1.53477	-3.75966	0.00055287	0.016319	-0.382668	DOWN
XM_005681536.3	2.5975	0.212995	3.75887	0.000554141	0.0163288	-0.242239	UP
MSTRG.12903.2	0.838113	2.36671	3.75868	0.000554453	0.0163288	-0.332556	NOT
MSTRG.5775.9	-1.84303	0.459357	-3.75618	0.000558527	0.0164209	-0.268113	DOWN
XM_013963339.2	0.718084	2.69616	3.756	0.000558837	0.0164209	-0.383797	NOT
XM_018053460.1	0.968095	1.44458	3.75488	0.000560663	0.016456	-0.277661	NOT
MSTRG.12219.1	-3.62576	0.469033	-3.75079	0.000567433	0.0166307	-0.308473	DOWN
XM_018038887.1	-1.03001	1.56978	-3.75051	0.000567891	0.0166307	-0.354965	DOWN
MSTRG.3669.16	2.58275	0.221207	3.74752	0.000572903	0.0167587	-0.271775	UP
MSTRG.3614.3	2.7153	3.44665	3.74567	0.000576015	0.0168309	-0.361002	UP
MSTRG.11314.3	-2.41721	4.41956	-3.74514	0.000576911	0.0168382	-0.605341	DOWN
XM_018040241.1	-1.71686	2.34326	-3.7433	0.000580032	0.0169104	-0.52781	DOWN
XM_018060182.1	1.36379	1.44382	3.74242	0.000581526	0.016935	-0.362977	UP
XM_018058000.1	-2.09289	1.72275	-3.74134	0.000583364	0.0169629	-0.443811	DOWN
XM_005684080.3	2.42049	0.735366	3.74109	0.000583785	0.0169629	-0.29065	UP
TRNAH-GUG_14	-2.4878	-0.607066	-3.74	0.000585666	0.0169986	-0.325605	DOWN
XM_005683180.3	-0.92133	3.03765	-3.73881	0.00058771	0.0170279	-0.523068	NOT
XM_018059139.1	-2.35393	-0.953459	-3.73865	0.000587978	0.0170279	-0.317479	DOWN
XM_018044504.1	2.41487	0.0405311	3.73784	0.000589369	0.0170335	-0.296175	UP
XM_018063713.1	-3.26285	1.91573	-3.73763	0.000589733	0.0170335	-0.415256	DOWN
XM_013969498.2	-1.4168	2.03815	-3.73699	0.000590849	0.0170335	-0.412434	DOWN
MSTRG.6505.1	-3.35902	2.35879	-3.73696	0.000590888	0.0170335	-0.477493	DOWN
XM_018038310.1	2.20948	0.645154	3.73658	0.000591557	0.0170335	-0.301368	UP
MSTRG.2172.1	-3.22404	-0.467746	-3.73617	0.000592267	0.0170335	-0.348234	DOWN
NM_001286443.1	3.0571	3.77647	3.73589	0.000592743	0.0170335	-0.427776	UP
XM_005699778.3	-0.996571	2.53446	-3.73443	0.000595283	0.0170877	-0.495456	NOT
XM_018064367.1	2.49576	2.4405	3.73385	0.000596299	0.0170913	-0.360689	UP
MSTRG.17875.1	-4.47742	1.19703	-3.73361	0.000596719	0.0170913	-0.402783	DOWN
XM_018045879.1	3.74543	3.02799	3.7332	0.000597439	0.0170932	-0.324799	UP
XM_005684376.3	3.14444	0.847285	3.73263	0.000598432	0.0171028	-0.313301	UP
MSTRG.10491.2	-2.62516	-0.79655	-3.73202	0.000599501	0.0171146	-0.333914	DOWN
MSTRG.7474.16	-1.69053	-0.104269	-3.73156	0.00060031	0.017119	-0.355972	DOWN
MSTRG.17611.1	-2.10345	1.40115	-3.72629	0.00060964	0.0173661	-0.405912	DOWN
XM_018051066.1	3.19298	3.19023	3.72545	0.000611123	0.0173706	-0.361321	UP
XM_005694774.3	1.17681	3.54001	3.72521	0.000611565	0.0173706	-0.500713	UP
MSTRG.8230.18	2.15757	-0.157069	3.72508	0.000611797	0.0173706	-0.327935	UP
XM_005690753.3	-1.08471	8.63087	-3.72428	0.000613233	0.0173925	-0.711682	DOWN
XM_018058077.1	3.30983	0.531938	3.72338	0.000614846	0.0173949	-0.338302	UP
XR_309953.3	-1.11849	4.44598	-3.72329	0.000615009	0.0173949	-0.661166	DOWN
XM_018045557.1	-1.16068	0.986752	-3.72311	0.000615318	0.0173949	-0.431062	DOWN
MSTRG.10723.2	-2.04533	0.968564	-3.72163	0.000617994	0.0174516	-0.460754	DOWN
XM_018057584.1	2.52773	3.61417	3.72114	0.000618879	0.0174577	-0.476538	UP
XM_018061330.1	2.85885	2.14024	3.71963	0.000621613	0.0175159	-0.359442	UP
XM_018061563.1	-1.68604	-0.489055	-3.71911	0.000622564	0.0175238	-0.350406	DOWN
MSTRG.17322.1	-0.961589	2.33818	-3.71775	0.000625035	0.0175744	-0.526367	NOT
NM_001285698.1	3.79152	3.75785	3.71659	0.000627157	0.017603	-0.373155	UP
XM_005683002.3	1.88921	1.96067	3.71636	0.000627582	0.017603	-0.421734	UP
MSTRG.6138.2	-1.45859	0.61278	-3.71609	0.000628076	0.017603	-0.417753	DOWN
XM_018048725.1	2.90889	1.1416	3.71561	0.00062896	0.0176089	-0.359811	UP
XM_018058714.1	-0.80271	4.6208	-3.71403	0.000631869	0.0176534	-0.694186	NOT
XR_001919054.1	-0.935701	6.78516	-3.71401	0.000631905	0.0176534	-0.724932	NOT
XM_018057107.1	1.65792	1.27138	3.71307	0.000633648	0.0176832	-0.364296	UP
XM_018053118.1	0.912771	3.30631	3.71195	0.000635714	0.0177219	-0.557778	NOT
TRNAG-UCC_67	-1.45781	0.312059	-3.71005	0.00063926	0.0177909	-0.419722	DOWN
XM_018053913.1	2.16727	2.62072	3.70989	0.000639552	0.0177909	-0.455514	UP
MSTRG.967.2	-1.86555	2.53078	-3.7089	0.000641415	0.0178237	-0.572572	DOWN
XM_005680552.3	-1.05038	5.00281	-3.70791	0.000643266	0.0178312	-0.715113	DOWN
MSTRG.17524.1	-1.28406	1.71964	-3.7077	0.000643658	0.0178312	-0.499444	DOWN
MSTRG.13092.1	-0.781759	1.16612	-3.70766	0.000643735	0.0178312	-0.459082	NOT
XM_005689986.2	-0.993619	10.3244	-3.70705	0.000644888	0.0178442	-0.767871	NOT
XM_005690611.3	2.9565	1.809	3.7057	0.000647434	0.0178956	-0.382415	UP
XM_018042804.1	-1.29093	1.93379	-3.70449	0.000649724	0.0179399	-0.553043	DOWN
MSTRG.2656.1	4.75197	2.51514	3.70327	0.00065203	0.0179666	-0.398166	UP
XM_018045049.1	-0.979108	2.53298	-3.70325	0.000652067	0.0179666	-0.567542	NOT
XM_018058540.1	-1.90737	1.26922	-3.7019	0.000654637	0.0180184	-0.50343	DOWN
MSTRG.6266.6	3.37197	0.44492	3.70127	0.000655841	0.0180325	-0.396212	UP
XM_018042048.1	-2.23379	-0.0429486	-3.70032	0.000657668	0.0180373	-0.408231	DOWN
XM_018059049.1	1.79303	1.38463	3.70018	0.000657946	0.0180373	-0.430318	UP
XM_018052633.1	-1.16821	0.77042	-3.69973	0.00065881	0.0180373	-0.443745	DOWN
XM_013969401.2	-1.50923	0.849068	-3.6997	0.000658866	0.0180373	-0.455565	DOWN
MSTRG.6949.3	-1.36141	0.85399	-3.69938	0.00065947	0.0180373	-0.47244	DOWN
XM_018038433.1	-0.882632	2.5587	-3.69794	0.000662247	0.0180943	-0.591595	NOT
XM_018059074.1	3.65719	4.35177	3.69566	0.000666658	0.0181957	-0.497205	UP
MSTRG.5339.2	2.52206	4.47557	3.69504	0.000667878	0.01821	-0.663517	UP
XM_018049889.1	-0.900699	5.71613	-3.6943	0.000669316	0.0182258	-0.766889	NOT
XM_018046216.1	3.02626	0.56627	3.69402	0.000669857	0.0182258	-0.416739	UP
MSTRG.3931.1	-1.76483	-0.178909	-3.69259	0.000672668	0.0182833	-0.416334	DOWN
XM_018052715.1	-3.6814	1.68705	-3.69125	0.000675293	0.0183355	-0.586015	DOWN
XM_018057738.1	-1.84804	0.83483	-3.68627	0.000685166	0.0185842	-0.515835	DOWN
XR_001919226.1	1.56142	0.397431	3.68583	0.000686036	0.0185885	-0.428871	UP
XM_018055691.1	-1.18393	0.797422	-3.68383	0.000690046	0.0186734	-0.486455	DOWN
XM_018052126.1	2.70094	0.294724	3.68325	0.000691217	0.0186734	-0.452614	UP
XM_005689730.3	2.29837	1.84452	3.68301	0.000691692	0.0186734	-0.445176	UP
XM_018040531.1	1.942	1.26299	3.68281	0.000692094	0.0186734	-0.452396	UP
MSTRG.9636.1	1.57241	2.5047	3.68236	0.000693001	0.0186734	-0.539314	UP
XM_018048283.1	0.721288	6.70406	3.68213	0.000693463	0.0186734	-0.801415	NOT
XM_005693260.3	0.611416	4.40688	3.67962	0.000698548	0.0187909	-0.761347	NOT
TRNAG-GCC_4	-2.04419	-0.518159	-3.67566	0.000706655	0.0189894	-0.473444	DOWN
XM_018042991.1	3.87367	3.35135	3.67528	0.00070743	0.0189907	-0.518478	UP
XM_005682340.1	2.89147	4.93115	3.67465	0.000708736	0.0190062	-0.684498	UP
XM_018067021.1	-2.52218	1.08269	-3.67356	0.000710988	0.0190368	-0.555133	DOWN
MSTRG.3883.1	1.22183	3.92887	3.67339	0.000711334	0.0190368	-0.706883	UP
XM_005686902.3	3.01364	0.509562	3.67299	0.000712154	0.0190392	-0.467539	UP
XR_001918424.1	1.28681	0.499367	3.67019	0.000717978	0.0191749	-0.466975	UP
MSTRG.7965.3	-2.16654	-0.0926225	-3.66916	0.000720137	0.0191749	-0.506165	DOWN
MSTRG.6584.2	2.32742	1.18811	3.66891	0.000720653	0.0191749	-0.484872	UP
MSTRG.17704.1	-1.06263	2.68856	-3.66889	0.000720706	0.0191749	-0.689213	DOWN
XR_001296821.2	-2.35878	5.67284	-3.66879	0.000720907	0.0191749	-0.836268	DOWN
XM_018048770.1	0.773022	3.38091	3.66817	0.000722203	0.0191829	-0.694003	NOT
XR_001296546.2	-1.14064	2.08817	-3.66795	0.000722676	0.0191829	-0.63673	DOWN
XM_018043021.1	-0.686904	3.22584	-3.66718	0.000724288	0.0192061	-0.728299	NOT
XM_018067200.1	2.15162	2.26087	3.66683	0.000725041	0.0192066	-0.563758	UP
MSTRG.15989.5	-1.62636	1.51463	-3.6662	0.000726366	0.0192222	-0.585889	DOWN
XM_005681322.2	-0.689666	4.90046	-3.66569	0.000727444	0.0192312	-0.831923	NOT
XM_018058370.1	1.59919	2.78498	3.66448	0.000730005	0.0192794	-0.640399	UP
XM_018050979.1	3.32028	2.60561	3.66296	0.000733242	0.0193312	-0.507758	UP
XM_018061129.1	4.25125	3.26605	3.66286	0.00073345	0.0193312	-0.505009	UP
XM_018059149.1	1.26432	1.52414	3.66232	0.000734587	0.0193416	-0.553022	UP
MSTRG.2290.1	2.55765	0.0460562	3.66184	0.000735625	0.0193495	-0.493806	UP
XM_018064792.1	-1.8536	4.32048	-3.65858	0.000742623	0.0194995	-0.867696	DOWN
XM_018050993.1	3.54191	2.83443	3.65849	0.000742824	0.0194995	-0.520859	UP
XR_001919057.1	2.77596	0.351652	3.65556	0.000749169	0.0196463	-0.517717	UP
MSTRG.17281.5	-1.97492	-0.638308	-3.65478	0.000750866	0.019671	-0.519986	DOWN
XM_018061891.1	-0.893538	8.92481	-3.65187	0.000757228	0.0198178	-0.913302	NOT
MSTRG.7544.3	-1.17053	1.74446	-3.65021	0.00076089	0.0198909	-0.680681	DOWN
XM_018044773.1	-1.51207	8.14736	-3.6497	0.000762011	0.0198909	-0.917188	DOWN
XM_018059459.1	-0.853064	1.46929	-3.64957	0.00076231	0.0198909	-0.617537	NOT
MSTRG.17163.1	-3.29988	5.79015	-3.64871	0.000764194	0.0199202	-0.893447	DOWN
XM_018050836.1	2.32273	-0.0441391	3.64785	0.000766121	0.0199505	-0.528416	UP
XM_018047227.1	-2.31753	1.5593	-3.64745	0.000767012	0.0199538	-0.681369	DOWN
MSTRG.1559.3	-0.999664	1.02018	-3.6461	0.000770004	0.0200085	-0.586411	NOT
XM_005689515.3	-0.944455	5.34743	-3.64525	0.000771918	0.0200085	-0.897923	NOT
XM_018040266.1	-0.641826	4.03151	-3.64493	0.000772625	0.0200085	-0.861924	NOT
XM_005679718.3	0.645301	3.03556	3.6448	0.000772918	0.0200085	-0.737211	NOT
XM_005675064.3	-1.31629	1.23233	-3.64479	0.00077295	0.0200085	-0.631711	DOWN
XM_005693142.3	2.15788	0.0786885	3.64272	0.000777606	0.0201091	-0.540435	UP
MSTRG.15880.1	1.1121	2.28036	3.64172	0.000779855	0.0201473	-0.64419	UP
XM_018059247.1	1.95748	1.28168	3.64076	0.000782037	0.0201837	-0.547983	UP
XM_018046991.1	-0.568147	3.49117	-3.64023	0.00078323	0.0201857	-0.833437	NOT
MSTRG.4878.1	-1.62668	5.03716	-3.6398	0.000784204	0.0201857	-0.895202	DOWN
MSTRG.5579.1	-0.942666	0.798482	-3.63959	0.000784692	0.0201857	-0.599472	NOT
XM_018061459.1	2.26866	1.27487	3.63936	0.000785208	0.0201857	-0.568332	UP
XM_018039051.1	1.26652	1.84709	3.63855	0.000787061	0.0202134	-0.59436	UP
XM_005695546.3	2.77803	0.213104	3.63809	0.000788101	0.0202202	-0.560163	UP
XM_018049667.1	-1.65921	0.465458	-3.63727	0.000789966	0.0202481	-0.589331	DOWN
MSTRG.6856.3	1.80615	1.54901	3.63681	0.000791038	0.0202557	-0.582301	UP
XM_018043622.1	0.949734	0.864222	3.63594	0.000793017	0.0202791	-0.570588	NOT
XM_005696179.3	-0.764449	1.40807	-3.63573	0.000793505	0.0202791	-0.650096	NOT
MSTRG.6304.1	-4.13783	0.323752	-3.63414	0.000797176	0.020318	-0.646211	DOWN
XM_005691618.3	2.72361	1.67178	3.63409	0.00079729	0.020318	-0.572905	UP
MSTRG.17143.1	-1.09244	3.813	-3.63405	0.00079739	0.020318	-0.881469	DOWN
XM_005677781.3	-0.802773	4.04556	-3.63315	0.000799469	0.020318	-0.896179	NOT
XM_005685117.3	2.52233	2.44652	3.63265	0.00080062	0.020318	-0.580465	UP
MSTRG.2596.1	-2.17426	3.06056	-3.6324	0.000801212	0.020318	-0.845604	DOWN
XM_018061890.1	1.11809	2.04466	3.63237	0.000801273	0.020318	-0.650806	UP
MSTRG.3036.1	-2.23262	-0.0934469	-3.63234	0.000801348	0.020318	-0.617972	DOWN
MSTRG.5794.10	2.82117	0.57042	3.63176	0.000802691	0.020318	-0.57284	UP
MSTRG.10179.42	-2.9495	-0.0135079	-3.63141	0.000803501	0.020318	-0.605818	DOWN
XM_018061002.1	3.96864	2.50216	3.63123	0.000803913	0.020318	-0.58867	UP
MSTRG.12581.1	-5.0304	1.30895	-3.63062	0.000805337	0.020318	-0.687321	DOWN
XM_005689157.3	-0.860635	3.89808	-3.63058	0.000805438	0.020318	-0.8761	NOT
MSTRG.10967.3	-1.19094	2.16914	-3.63037	0.000805931	0.020318	-0.745163	DOWN
MSTRG.3255.2	-2.53266	0.773237	-3.62807	0.000811306	0.0204338	-0.640993	DOWN
XM_018064428.1	0.534117	3.28654	3.62759	0.000812443	0.0204427	-0.791893	NOT
XM_005692283.3	2.25352	4.30929	3.62572	0.000816851	0.0205168	-0.713961	UP
MSTRG.4372.2	-2.1808	0.671359	-3.62567	0.000816961	0.0205168	-0.684558	DOWN
MSTRG.5794.9	3.18736	1.0882	3.62224	0.000825104	0.0206724	-0.599626	UP
XR_001297614.1	-1.05023	3.86684	-3.6221	0.000825458	0.0206724	-0.900598	DOWN
XR_310816.3	-1.90849	0.586274	-3.62206	0.000825535	0.0206724	-0.660556	DOWN
XM_005698536.3	2.28079	2.21399	3.62109	0.000827869	0.020711	-0.605342	UP
XM_018059024.1	-1.99933	-0.86244	-3.62066	0.000828896	0.0207168	-0.608754	DOWN
XM_018044615.1	2.72406	2.44795	3.61961	0.000831423	0.0207555	-0.68036	UP
XM_018058360.1	5.20643	7.06938	3.61935	0.000832032	0.0207555	-0.827876	UP
MSTRG.10420.3	2.89811	0.364733	3.61803	0.000835222	0.0208151	-0.608606	UP
MSTRG.2245.1	-4.37459	-0.126013	-3.61654	0.000838822	0.0208849	-0.697799	DOWN
XM_013971245.2	1.62447	0.824661	3.61425	0.000844407	0.0210039	-0.613244	UP
TRNAD-GUC_3	-1.45828	0.312059	-3.61281	0.00084792	0.0210712	-0.676687	DOWN
MSTRG.8118.1	-1.56349	1.22707	-3.61243	0.000848848	0.0210742	-0.693785	DOWN
XM_005690080.3	-2.71023	5.59474	-3.60975	0.000855461	0.0212182	-1.01771	DOWN
MSTRG.703.1	1.96282	1.01341	3.60875	0.000857925	0.0212369	-0.64496	UP
MSTRG.2160.1	-3.57272	0.323719	-3.6086	0.000858296	0.0212369	-0.724024	DOWN
XM_005684236.3	2.37061	1.88643	3.60846	0.000858656	0.0212369	-0.636448	UP
MSTRG.17067.1	-2.09764	-0.380477	-3.60667	0.000863096	0.0212808	-0.663046	DOWN
MSTRG.5612.3	-0.939751	2.6317	-3.60659	0.000863307	0.0212808	-0.884342	NOT
MSTRG.3588.1	1.07203	2.30101	3.60646	0.000863611	0.0212808	-0.782704	UP
MSTRG.2615.2	1.96949	0.703347	3.60626	0.000864112	0.0212808	-0.636604	UP
XM_018065069.1	2.61737	2.0813	3.60606	0.00086463	0.0212808	-0.72481	UP
MSTRG.9428.1	-2.61394	1.40604	-3.60578	0.000865325	0.0212808	-0.788359	DOWN
MSTRG.17812.1	-2.13834	1.78593	-3.60473	0.000867953	0.0213203	-0.74902	DOWN
XM_018060577.1	2.57422	2.3147	3.60448	0.000868564	0.0213203	-0.660764	UP
XR_001295594.2	-1.60742	2.7646	-3.60382	0.000870229	0.0213411	-0.873463	DOWN
XR_001917597.1	2.07786	1.4425	3.60287	0.00087263	0.0213798	-0.648774	UP
XM_005700408.3	2.23071	-0.0524901	3.60177	0.000875399	0.0214156	-0.652674	UP
XM_018050805.1	1.89879	1.75419	3.60164	0.00087573	0.0214156	-0.67953	UP
MSTRG.3884.7	1.59395	0.930351	3.6004	0.00087886	0.0214445	-0.679212	UP
XM_005682718.3	3.32789	0.623246	3.60028	0.000879159	0.0214445	-0.657021	UP
XM_005685883.3	2.2475	1.0338	3.6002	0.000879377	0.0214445	-0.656795	UP
MSTRG.15070.12	2.10663	0.724472	3.59753	0.000886183	0.0215903	-0.664722	UP
XM_013974035.2	-1.92969	1.17779	-3.59718	0.000887066	0.0215916	-0.917427	DOWN
XM_018062369.1	3.21369	1.7191	3.59599	0.000890129	0.021646	-0.674801	UP
XM_018047821.1	1.31698	2.36963	3.59279	0.000898362	0.0218258	-0.754063	UP
XM_018061911.1	2.82269	1.18285	3.59209	0.000900188	0.0218495	-0.678883	UP
XM_018052866.1	-2.01287	1.61992	-3.59138	0.000902021	0.0218495	-0.855016	DOWN
MSTRG.16271.1	-3.19896	7.38875	-3.59102	0.000902979	0.0218495	-1.07294	DOWN
XM_005684320.3	-2.24805	1.60232	-3.59083	0.00090346	0.0218495	-0.805153	DOWN
XM_005696600.3	3.07437	3.42133	3.59081	0.000903522	0.0218495	-0.696892	UP
XM_005687362.3	2.02056	0.212744	3.58975	0.000906292	0.0218819	-0.674704	UP
XM_018064544.1	1.57716	0.575182	3.58965	0.000906541	0.0218819	-0.675596	UP
XM_018041414.1	1.25731	0.742097	3.58918	0.000907767	0.0218913	-0.684311	UP
XM_018061224.1	0.747117	2.81146	3.5872	0.000912977	0.0219757	-0.863315	NOT
XM_018054806.1	2.01994	4.79037	3.58695	0.000913613	0.0219757	-0.946679	UP
MSTRG.9880.5	2.12917	0.826469	3.58689	0.000913793	0.0219757	-0.687367	UP
XM_018060334.1	0.685105	4.44789	3.58656	0.000914655	0.0219761	-0.993899	NOT
MSTRG.2220.1	2.61621	1.28567	3.58569	0.000916935	0.0220107	-0.70387	UP
XM_018044441.1	1.48486	0.277667	3.58501	0.000918746	0.0220108	-0.686463	UP
XM_018060256.1	2.10557	1.22225	3.58437	0.000920439	0.0220108	-0.701638	UP
XM_018066648.1	2.05419	0.996289	3.58387	0.000921772	0.0220108	-0.697291	UP
XM_018047944.1	-2.42098	0.902459	-3.58381	0.000921935	0.0220108	-0.848718	DOWN
XM_018065950.1	1.9722	-0.139804	3.58338	0.000923078	0.0220108	-0.690496	UP
MSTRG.10210.4	2.29325	3.22184	3.58337	0.000923109	0.0220108	-0.825321	UP
MSTRG.12227.1	-0.704092	2.0996	-3.58336	0.000923117	0.0220108	-0.870697	NOT
XR_001297528.2	-0.669747	2.95674	-3.58315	0.000923691	0.0220108	-0.941708	NOT
XM_018042329.1	2.0792	-0.0322997	3.58169	0.000927565	0.022083	-0.695761	UP
XM_018066260.1	1.3478	0.511345	3.57969	0.000932942	0.0221907	-0.705748	UP
XM_005683410.3	-0.881647	5.52367	-3.57911	0.000934496	0.0222054	-1.07742	NOT
XM_018045063.1	-0.560353	5.77869	-3.57859	0.000935897	0.0222054	-1.07888	NOT
MSTRG.12188.1	-1.6431	1.87371	-3.57821	0.000936907	0.0222054	-0.880586	DOWN
XM_018063815.1	1.96944	1.6203	3.57819	0.000936962	0.0222054	-0.741245	UP
XM_005693864.3	-0.591728	5.41105	-3.5778	0.000938027	0.0222105	-1.07832	NOT
MSTRG.17657.1	-2.29046	1.68893	-3.57706	0.000940029	0.0222283	-0.819595	DOWN
XM_005696338.3	-0.869165	3.32118	-3.57689	0.000940482	0.0222283	-0.970663	NOT
MSTRG.5794.7	-1.90119	-0.453961	-3.57587	0.000943259	0.0222737	-0.732952	DOWN
MSTRG.4421.1	-2.73624	0.183727	-3.57371	0.000949134	0.02238	-0.758542	DOWN
XM_018063729.1	1.94525	3.11118	3.57358	0.000949476	0.02238	-0.796529	UP
MSTRG.8640.1	1.39058	1.54412	3.57258	0.000952235	0.0224248	-0.776675	UP
XM_018051254.1	1.473	0.374597	3.57091	0.000956809	0.0225026	-0.722164	UP
XM_018050077.1	2.98838	1.64534	3.57061	0.000957629	0.0225026	-0.735175	UP
MSTRG.12902.1	4.7352	3.04216	3.57043	0.000958125	0.0225026	-0.84696	UP
XM_018062746.1	0.651348	3.73879	3.56961	0.000960407	0.0225359	-0.999287	NOT
XM_018051743.1	0.759352	1.87013	3.56904	0.000961968	0.0225423	-0.812123	NOT
XM_018051814.1	2.16631	1.59353	3.56821	0.000964259	0.0225423	-0.742098	UP
MSTRG.17245.1	-1.56275	2.97839	-3.56799	0.000964867	0.0225423	-0.989276	DOWN
MSTRG.1940.1	-3.8344	1.081	-3.56797	0.000964927	0.0225423	-0.821863	DOWN
MSTRG.9135.1	2.44705	2.18848	3.56786	0.000965228	0.0225423	-0.798654	UP
MSTRG.12206.2	-1.28415	2.2078	-3.56764	0.000965864	0.0225423	-1.0138	DOWN
XM_018056522.1	0.730882	3.28147	3.56704	0.000967521	0.0225608	-0.982709	NOT
XM_018053685.1	2.24211	0.108484	3.56569	0.000971276	0.022619	-0.745179	UP
MSTRG.7972.1	2.24752	1.01134	3.56537	0.000972167	0.022619	-0.743164	UP
XR_001919380.1	2.52756	1.77384	3.56497	0.000973309	0.022619	-0.861198	UP
MSTRG.4602.5	-1.17289	2.46823	-3.5649	0.000973484	0.022619	-0.949423	DOWN
MSTRG.67.1	1.54424	10.622	3.56445	0.000974763	0.0226285	-1.15839	UP
MSTRG.15061.2	1.55884	1.20275	3.56087	0.000984842	0.0228422	-0.764603	UP
MSTRG.11984.11	1.21025	1.03599	3.56042	0.000986114	0.0228514	-0.78394	UP
XM_018062295.1	2.26922	0.564048	3.56009	0.00098705	0.0228528	-0.756798	UP
MSTRG.1838.3	-1.54055	1.04172	-3.55945	0.000988863	0.0228686	-0.846731	DOWN
XM_018038845.1	0.820655	2.97558	3.55923	0.000989486	0.0228686	-0.921241	NOT
MSTRG.1082.6	-1.84075	-0.430846	-3.55889	0.000990451	0.0228707	-0.774762	DOWN
XM_018057285.1	-0.608965	3.08099	-3.5577	0.000993853	0.0229289	-1.04112	NOT
XM_018064147.1	1.34836	1.08236	3.55737	0.000994796	0.0229304	-0.77087	UP
TRNAS-GGA_13	-1.59394	-0.686655	-3.5566	0.000996989	0.0229434	-0.770341	DOWN
MSTRG.60.7	-1.75967	-0.497969	-3.55629	0.000997865	0.0229434	-0.780706	DOWN
XR_001296874.2	-0.994439	2.22213	-3.55625	0.000997999	0.0229434	-0.940364	NOT
XM_018060661.1	1.03374	0.811113	3.55568	0.00099962	0.0229605	-0.800304	UP
XM_018055814.1	2.61967	0.617599	3.55454	0.00100291	0.023003	-0.769142	UP
MSTRG.17633.1	-3.46684	0.508158	-3.55442	0.00100324	0.023003	-0.850909	DOWN
XM_013973208.2	2.37345	1.83591	3.55355	0.00100576	0.0230406	-0.782983	UP
MSTRG.275.1	-2.26977	0.452858	-3.55323	0.00100667	0.0230413	-0.81344	DOWN
XM_018038609.1	-1.21906	2.45796	-3.55238	0.00100915	0.0230513	-1.05886	DOWN
MSTRG.1388.3	-0.94885	2.48858	-3.55234	0.00100927	0.0230513	-1.00642	NOT
XM_018038586.1	4.86356	4.25352	3.55217	0.00100976	0.0230513	-0.801957	UP
XM_018040244.1	0.969303	3.78389	3.55115	0.00101272	0.0230986	-1.06371	NOT
MSTRG.16560.15	-1.84874	-0.32258	-3.55036	0.00101502	0.0231113	-0.791451	DOWN
XM_018062497.1	1.84713	1.1574	3.55007	0.00101587	0.0231113	-0.794966	UP
XM_018039685.1	2.62449	0.0788471	3.55004	0.00101593	0.0231113	-0.780604	UP
XM_005683147.3	-1.0199	1.2521	-3.54851	0.00102041	0.0231929	-0.8879	DOWN
XM_018056604.1	0.83584	2.06402	3.5476	0.00102307	0.0232332	-0.901163	NOT
XM_018062747.1	1.57456	0.82566	3.54675	0.00102559	0.0232425	-0.800881	UP
XM_018059803.1	2.14136	1.63575	3.54674	0.00102561	0.0232425	-0.795004	UP
XM_018048882.1	1.77041	2.26839	3.54656	0.00102615	0.0232425	-0.809341	UP
XM_005679581.3	1.28681	0.35078	3.54424	0.001033	0.0233773	-0.787781	UP
XM_018048297.1	2.03628	0.274549	3.54231	0.00103873	0.0234867	-0.795326	UP
XM_005690614.3	-1.988	2.08557	-3.54094	0.00104282	0.0235514	-0.983061	DOWN
XM_018062687.1	1.85729	2.58281	3.54054	0.00104402	0.0235514	-0.91181	UP
XM_018063823.1	0.612165	4.66066	3.54044	0.0010443	0.0235514	-1.13992	NOT
XM_018044816.1	1.12558	2.29704	3.53814	0.00105123	0.0236871	-0.945143	UP
NM_001285632.1	-0.836789	9.37427	-3.53553	0.0010591	0.0238238	-1.23221	NOT
MSTRG.16482.1	2.62641	2.49888	3.53514	0.00106029	0.0238238	-0.899943	UP
XM_005689473.3	-0.784051	4.49801	-3.53496	0.00106084	0.0238238	-1.17899	NOT
XM_018055613.1	1.74752	0.47898	3.53485	0.00106116	0.0238238	-0.816585	UP
XM_018057931.1	2.46493	3.25792	3.53463	0.00106186	0.0238238	-0.940267	UP
MSTRG.5892.3	-3.32636	1.20698	-3.53388	0.00106414	0.0238319	-0.959294	DOWN
MSTRG.7571.1	1.79573	1.14182	3.53378	0.00106445	0.0238319	-0.852587	UP
MSTRG.5775.12	-1.85979	0.212293	-3.53361	0.00106496	0.0238319	-0.841835	DOWN
XM_018050726.1	2.17508	-0.049565	3.5326	0.00106805	0.0238557	-0.821261	UP
XM_018066566.1	-0.82839	4.88105	-3.53243	0.00106856	0.0238557	-1.19729	NOT
MSTRG.17604.1	-2.32278	1.21614	-3.53224	0.00106913	0.0238557	-0.92952	DOWN
XM_018041897.1	2.1247	-0.112439	3.53206	0.00106968	0.0238557	-0.82217	UP
MSTRG.13624.3	3.68323	1.39179	3.53097	0.00107303	0.0238979	-0.841891	UP
MSTRG.17065.2	2.23245	0.130207	3.53084	0.00107343	0.0238979	-0.830947	UP
XM_018057741.1	3.51001	0.950925	3.53055	0.00107432	0.0238979	-0.83667	UP
MSTRG.16347.1	-0.695407	3.73765	-3.52913	0.0010787	0.0239748	-1.15796	NOT
XM_005690070.3	-2.10145	-0.0322997	-3.52833	0.00108117	0.0239835	-0.86786	DOWN
XM_005699799.3	-1.15079	5.66206	-3.52822	0.00108153	0.0239835	-1.21559	DOWN
XM_018045081.1	2.26187	0.0149741	3.528	0.00108221	0.0239835	-0.833718	UP
MSTRG.13332.1	-1.9962	0.0573016	-3.52778	0.00108287	0.0239835	-0.885495	DOWN
MSTRG.4223.2	-2.22355	-0.0576386	-3.52752	0.00108368	0.0239835	-0.871171	DOWN
XM_018055826.1	2.15398	6.28346	3.52709	0.00108502	0.0239856	-1.21533	UP
XM_005698439.3	2.11104	1.87671	3.5269	0.00108562	0.0239856	-0.901901	UP
XR_001297098.2	-1.38369	1.3645	-3.52451	0.00109306	0.0241183	-0.947962	DOWN
XR_001296067.2	-2.60261	0.357254	-3.52413	0.00109424	0.0241183	-0.904712	DOWN
XM_005697503.2	1.77022	2.92543	3.52335	0.0010967	0.0241183	-0.928375	UP
XM_005690039.3	1.96856	1.26527	3.52332	0.00109681	0.0241183	-0.858012	UP
XM_005675986.3	-1.37364	2.45658	-3.52306	0.0010976	0.0241183	-1.05721	DOWN
MSTRG.14689.1	-0.890181	2.71365	-3.52293	0.001098	0.0241183	-1.10628	NOT
MSTRG.10733.1	-0.650603	2.13383	-3.52275	0.0010986	0.0241183	-1.0392	NOT
XM_018056775.1	2.63293	0.419045	3.52241	0.00109967	0.0241183	-0.850843	UP
MSTRG.17794.1	-3.53812	0.948826	-3.52232	0.00109994	0.0241183	-0.94948	DOWN
XM_018063127.1	1.60437	0.804704	3.52183	0.00110148	0.0241194	-0.855668	UP
XM_005683386.2	1.20137	1.89311	3.5212	0.00110347	0.0241194	-0.927771	UP
XM_018047668.1	1.96487	5.49783	3.52113	0.00110368	0.0241194	-1.19986	UP
XM_018048113.1	2.41747	1.06991	3.52108	0.00110384	0.0241194	-0.86271	UP
XM_005680884.3	1.31499	5.30711	3.5207	0.00110504	0.0241194	-1.18109	UP
XM_018064584.1	1.36833	4.21778	3.52054	0.00110554	0.0241194	-1.17496	UP
MSTRG.9919.5	-0.860679	1.06276	-3.52021	0.00110659	0.0241222	-0.931589	NOT
XM_018038784.1	2.26059	3.2713	3.51974	0.0011081	0.0241348	-0.970866	UP
XM_018059699.1	2.73662	0.210679	3.51871	0.00111135	0.0241856	-0.860954	UP
XM_018064490.1	3.24594	0.405673	3.51823	0.00111287	0.0241949	-0.865997	UP
XM_018053073.1	-1.58037	1.1053	-3.51799	0.00111363	0.0241949	-1.07802	DOWN
XM_005695616.3	2.27975	3.00546	3.51739	0.00111554	0.0242162	-0.981643	UP
XM_013965333.2	1.1941	0.126017	3.51423	0.00112567	0.0244089	-0.862464	UP
MSTRG.15818.3	1.59298	2.03713	3.51404	0.00112629	0.0244089	-0.912212	UP
XM_018050977.1	-2.55204	0.833793	-3.51321	0.00112898	0.0244353	-1.01993	DOWN
XM_018039020.1	1.83519	2.33343	3.51285	0.00113013	0.0244353	-0.961865	UP
XM_005683172.3	-1.08092	9.84122	-3.51266	0.00113076	0.0244353	-1.29531	DOWN
MSTRG.15984.2	-2.36815	-0.412659	-3.5125	0.00113125	0.0244353	-0.917495	DOWN
XR_001919521.1	2.44587	0.0317598	3.51185	0.00113337	0.0244606	-0.876115	UP
XM_018039319.1	2.15067	0.504036	3.51119	0.00113551	0.0244716	-0.885576	UP
XM_005700853.3	0.681553	5.70781	3.51081	0.00113674	0.0244716	-1.25039	NOT
XM_005693429.3	-0.661836	4.09096	-3.51029	0.00113841	0.0244716	-1.20898	NOT
XM_018040183.1	2.59293	1.00523	3.51017	0.00113881	0.0244716	-0.894081	UP
XM_018058560.1	2.48941	3.08773	3.51004	0.00113925	0.0244716	-0.95478	UP
XM_018048036.1	2.46107	0.115165	3.50996	0.0011395	0.0244716	-0.881019	UP
XM_013970517.2	-1.52673	0.462953	-3.5089	0.00114296	0.0245257	-0.962684	DOWN
XM_018057867.1	2.64724	3.58027	3.50667	0.00115025	0.0246618	-1.02264	UP
MSTRG.7231.2	-1.61359	0.919057	-3.50608	0.00115219	0.0246833	-0.986289	DOWN
XM_018038493.1	2.67371	1.93299	3.50521	0.00115506	0.0247083	-1.02592	UP
XM_005695098.3	2.17362	0.188416	3.50486	0.0011562	0.0247083	-0.891309	UP
XM_018040705.1	-0.782395	5.55082	-3.50486	0.00115621	0.0247083	-1.27866	NOT
XM_018055835.1	-1.58241	1.13946	-3.50275	0.00116319	0.0248373	-1.0083	DOWN
XM_005675036.2	-0.789702	1.35119	-3.5022	0.00116502	0.0248559	-1.00648	NOT
XM_005693236.3	2.65317	2.45609	3.50189	0.00116606	0.0248578	-0.911023	UP
MSTRG.11742.3	-1.29908	1.30766	-3.50141	0.00116765	0.0248714	-1.0156	DOWN
XM_018042638.1	1.04829	0.916442	3.49961	0.00117369	0.0249614	-0.921512	UP
XM_013972380.2	-1.21258	0.823964	-3.49956	0.00117385	0.0249614	-0.982151	DOWN
XM_018044562.1	1.43433	1.70412	3.49929	0.00117475	0.0249614	-1.03517	UP
MSTRG.14239.3	-1.91745	1.74969	-3.49851	0.00117736	0.0249966	-1.1194	DOWN
NM_001314331.1	1.53103	9.27794	3.49812	0.00117869	0.0250045	-1.32195	UP
XM_018063620.1	1.92897	0.863525	3.49719	0.0011818	0.0250501	-0.916817	UP
XM_018053428.1	3.08407	4.44342	3.49688	0.00118286	0.0250522	-1.02857	UP
XM_018057003.1	2.61017	3.22633	3.49625	0.00118497	0.0250623	-1.0446	UP
XM_013963530.2	1.04851	0.852244	3.49593	0.00118608	0.0250623	-0.924759	UP
XM_018049792.1	-2.14566	0.699884	-3.49547	0.00118761	0.0250623	-0.944372	DOWN
XM_013963787.2	-0.672341	1.36678	-3.49514	0.00118874	0.0250623	-1.01535	NOT
XM_018039891.1	2.80055	2.38052	3.49503	0.00118911	0.0250623	-0.965645	UP
XM_018055241.1	3.14357	4.77998	3.49486	0.0011897	0.0250623	-1.13519	UP
XM_018058493.1	-1.45256	1.0121	-3.49475	0.00119006	0.0250623	-1.03642	DOWN
XM_018038943.1	2.42982	0.0956764	3.49386	0.00119309	0.0251059	-0.921406	UP
MSTRG.16296.1	-2.09374	-0.123975	-3.49328	0.00119505	0.0251269	-0.952002	DOWN
MSTRG.12920.5	-0.720815	3.66021	-3.49287	0.00119644	0.0251348	-1.22673	NOT
MSTRG.8211.2	2.8322	0.174127	3.49251	0.00119768	0.0251348	-0.927951	UP
XM_018054426.1	1.03111	3.51653	3.49207	0.0011992	0.0251348	-1.17531	UP
MSTRG.12768.3	2.17084	-0.026731	3.49193	0.00119967	0.0251348	-0.923891	UP
XM_018041416.1	-1.16871	1.3854	-3.49176	0.00120024	0.0251348	-1.04388	DOWN
XM_018043776.1	0.961613	2.98128	3.48979	0.00120701	0.0252562	-1.13469	NOT
XM_018043466.1	2.77029	4.57514	3.48794	0.00121339	0.0253693	-1.09044	UP
XM_018055596.1	2.92913	0.445224	3.48729	0.00121563	0.0253921	-0.941877	UP
XM_018038431.1	1.90479	1.19359	3.48677	0.00121744	0.0253921	-1.00131	UP
XM_018052778.1	0.645402	3.31225	3.48667	0.00121778	0.0253921	-1.18349	NOT
XM_018041831.1	2.95966	2.73	3.4865	0.00121837	0.0253921	-0.982684	UP
XM_005678553.3	-0.742672	10.3661	-3.48579	0.00122083	0.0254113	-1.37114	NOT
XM_018054449.1	1.73376	2.13578	3.48568	0.00122124	0.0254113	-1.01633	UP
MSTRG.6747.1	-5.70652	1.73643	-3.48528	0.00122264	0.0254201	-1.08288	DOWN
MSTRG.14711.4	-2.342	-0.161954	-3.48396	0.00122722	0.0254952	-0.990072	DOWN
XM_013970703.2	-1.8284	0.368362	-3.48358	0.00122856	0.0254967	-1.01688	DOWN
XM_018047541.1	2.34982	0.113237	3.48317	0.00122999	0.0254967	-0.955838	UP
XM_005682621.3	3.83192	3.65295	3.4831	0.00123023	0.0254967	-0.982791	UP
MSTRG.1527.1	-1.07103	1.28402	-3.48227	0.00123315	0.0255369	-1.05386	DOWN
XM_013977098.2	-0.952548	4.3788	-3.48147	0.00123597	0.0255751	-1.32804	NOT
XM_018058200.1	-1.88276	0.055918	-3.48052	0.0012393	0.0256237	-0.976465	DOWN
XM_018066667.1	1.24699	4.27875	3.47958	0.00124264	0.0256723	-1.26385	UP
MSTRG.8219.1	-1.17236	1.55485	-3.47864	0.00124596	0.0256816	-1.16366	DOWN
XR_311047.3	-0.808429	1.72675	-3.47857	0.00124621	0.0256816	-1.11741	NOT
XM_018040382.1	-2.17033	1.74677	-3.47842	0.00124674	0.0256816	-1.15145	DOWN
MSTRG.2877.8	2.43136	0.701392	3.47814	0.00124773	0.0256816	-0.973929	UP
MSTRG.12175.1	-0.912764	1.50082	-3.47806	0.00124801	0.0256816	-1.09819	NOT
XM_018045025.1	4.23693	1.10613	3.47733	0.00125061	0.0257148	-0.977418	UP
XM_018063498.1	-2.81495	6.2775	-3.47508	0.00125865	0.0258599	-1.37764	DOWN
XM_018045153.1	2.18475	1.18465	3.4747	0.00126001	0.0258673	-1.01053	UP
XM_005682516.3	-0.804788	4.15993	-3.47429	0.00126148	0.0258771	-1.32313	NOT
XM_018061772.1	-0.737184	3.05726	-3.47277	0.00126693	0.0259687	-1.24573	NOT
MSTRG.16763.35	3.07597	0.234487	3.47182	0.00127036	0.0259865	-0.982067	UP
MSTRG.7083.3	-1.85389	-0.306071	-3.47174	0.00127065	0.0259865	-1.01337	DOWN
XM_005683063.3	2.33479	0.72339	3.4717	0.00127079	0.0259865	-0.976331	UP
MSTRG.11714.2	-1.97492	-0.600892	-3.47058	0.00127487	0.0260109	-0.991769	DOWN
XM_005683677.3	-0.874002	2.95806	-3.47034	0.00127574	0.0260109	-1.22343	NOT
MSTRG.17789.1	-1.47077	1.36809	-3.47004	0.00127684	0.0260109	-1.07225	DOWN
XM_005691668.3	-0.863609	9.81398	-3.4698	0.00127768	0.0260109	-1.41065	NOT
XM_018062400.1	2.35412	0.339508	3.4696	0.0012784	0.0260109	-0.98679	UP
XM_018065235.1	-1.80663	2.72261	-3.46919	0.00127989	0.0260109	-1.23956	DOWN
XM_005691557.3	2.34279	-0.191089	3.46919	0.00127991	0.0260109	-0.982731	UP
MSTRG.747.2	1.37974	0.852649	3.46918	0.00127996	0.0260109	-0.996363	UP
MSTRG.14929.2	-0.995172	1.76512	-3.46875	0.00128152	0.0260223	-1.12346	NOT
XM_018066239.1	3.05903	6.57235	3.46839	0.00128283	0.0260286	-1.31193	UP
XM_005675228.3	-1.26268	1.2265	-3.46788	0.00128469	0.0260462	-1.19048	DOWN
XM_018042929.1	1.98262	2.04572	3.46741	0.00128641	0.026047	-1.11604	UP
XM_018057591.1	1.38198	0.618849	3.46729	0.00128685	0.026047	-0.991073	UP
MSTRG.16178.7	-2.88717	1.65941	-3.46705	0.00128773	0.026047	-1.11096	DOWN
XM_005680848.3	-1.94559	0.51853	-3.46629	0.00129052	0.0260833	-1.09557	DOWN
TRNAD-GUC_1	-1.61578	0.498755	-3.46586	0.00129208	0.0260946	-1.06502	DOWN
XR_001919298.1	-1.58323	1.4369	-3.46462	0.00129664	0.0261591	-1.18813	DOWN
XM_018060164.1	-1.62765	2.43148	-3.46445	0.00129728	0.0261591	-1.2152	DOWN
XM_018062726.1	1.82876	0.902628	3.46367	0.00130013	0.0261965	-1.00488	UP
MSTRG.17167.2	-1.245	2.1407	-3.46279	0.00130339	0.0262418	-1.18351	DOWN
XM_005685220.3	2.27711	0.454723	3.46214	0.00130583	0.0262586	-0.999789	UP
MSTRG.11087.4	-1.56043	2.01076	-3.46203	0.00130624	0.0262586	-1.20923	DOWN
XM_018044188.1	1.75862	0.893168	3.46111	0.00130962	0.0263064	-1.01071	UP
MSTRG.5654.1	-2.75494	1.68901	-3.45996	0.00131394	0.0263635	-1.20527	DOWN
XM_018061957.1	1.61489	1.81952	3.45981	0.00131449	0.0263635	-1.04637	UP
NM_001285678.1	1.69559	6.233	3.45893	0.00131777	0.0264091	-1.37287	UP
XM_005683995.3	-2.17243	1.32561	-3.45845	0.00131957	0.0264249	-1.12163	DOWN
MSTRG.261.1	2.45644	-0.00962407	3.45759	0.0013228	0.0264691	-1.02403	UP
XM_018050750.1	1.65272	2.48842	3.4573	0.00132388	0.0264706	-1.09659	UP
XM_018062314.1	2.79909	0.065538	3.45566	0.00133005	0.0265736	-1.02052	UP
MSTRG.17468.1	-1.67205	1.99223	-3.45509	0.0013322	0.026576	-1.18618	DOWN
XM_005677808.3	1.16703	0.973248	3.45507	0.0013323	0.026576	-1.01886	UP
XM_018039971.1	-0.646741	4.33065	-3.45482	0.00133323	0.026576	-1.37794	NOT
MSTRG.7914.1	-2.89849	0.456252	-3.45408	0.00133604	0.0265944	-1.1272	DOWN
MSTRG.614.2	1.69378	0.509275	3.45404	0.0013362	0.0265944	-1.03794	UP
XM_018057973.1	-1.38375	0.970664	-3.45377	0.00133721	0.0265944	-1.11176	DOWN
XM_018054064.1	2.89874	3.19511	3.45341	0.00133858	0.0266013	-1.11947	UP
XM_013962706.2	0.801424	2.65417	3.45259	0.00134171	0.0266432	-1.18215	NOT
XM_018046223.1	-1.34921	1.9245	-3.4522	0.0013432	0.0266526	-1.1882	DOWN
XM_018059695.1	-2.22772	6.95149	-3.45059	0.00134936	0.0267544	-1.44173	DOWN
XM_018047289.1	2.14045	0.898916	3.44949	0.00135355	0.0268157	-1.03555	UP
XM_005691387.3	1.29696	2.21862	3.44916	0.00135482	0.0268157	-1.14357	UP
XM_018038725.1	1.59588	2.1454	3.44883	0.0013561	0.0268157	-1.15721	UP
XM_018056048.1	2.09833	0.547624	3.44871	0.00135656	0.0268157	-1.03712	UP
MSTRG.9236.6	-2.90499	-0.430851	-3.44733	0.00136188	0.0268831	-1.07992	DOWN
MSTRG.12469.2	-2.20286	0.203548	-3.44729	0.00136203	0.0268831	-1.10192	DOWN
XM_005694472.3	1.77667	0.919288	3.44581	0.00136777	0.026976	-1.04477	UP
XM_018054692.1	2.08114	-0.165983	3.44501	0.00137085	0.0270163	-1.04049	UP
XM_018048224.1	1.23917	2.79837	3.44391	0.00137514	0.0270804	-1.21878	UP
XM_005689638.3	2.24937	1.71827	3.44236	0.00138118	0.0271789	-1.08054	UP
MSTRG.6491.1	-1.38173	2.9571	-3.44131	0.00138533	0.0272098	-1.32422	DOWN
XM_005686569.3	-1.06796	3.02302	-3.44124	0.00138559	0.0272098	-1.34315	DOWN
XM_018042069.1	1.19624	2.13964	3.44099	0.00138658	0.0272098	-1.13406	UP
MSTRG.5775.1	-1.94317	3.62392	-3.44021	0.00138965	0.0272098	-1.34573	DOWN
MSTRG.17249.1	-4.29085	1.32244	-3.43984	0.0013911	0.0272098	-1.17406	DOWN
XM_018054199.1	1.62347	1.08911	3.43981	0.0013912	0.0272098	-1.05809	UP
XM_018051511.1	1.2507	1.43353	3.43977	0.00139137	0.0272098	-1.13341	UP
XM_018048756.1	2.5459	1.4563	3.43924	0.00139347	0.0272098	-1.07334	UP
MSTRG.5830.1	-1.96605	-0.246745	-3.43919	0.00139367	0.0272098	-1.08168	DOWN
XM_018048984.1	1.39451	1.02107	3.43913	0.00139389	0.0272098	-1.09075	UP
MSTRG.13060.1	-1.01896	1.40556	-3.43905	0.00139422	0.0272098	-1.17315	DOWN
MSTRG.2702.8	1.67694	1.45574	3.43644	0.00140455	0.0273881	-1.11168	UP
XM_005686812.3	1.66661	0.214734	3.43621	0.00140546	0.0273881	-1.05719	UP
MSTRG.6965.2	2.48886	0.097561	3.43589	0.00140675	0.0273927	-1.07269	UP
XM_018062876.1	1.50732	1.54293	3.43497	0.00141044	0.0274239	-1.10102	UP
XM_013964694.2	6.91387	3.57931	3.43496	0.00141045	0.0274239	-1.10544	UP
MSTRG.470.1	-2.13769	-0.0312213	-3.43425	0.00141328	0.0274585	-1.10618	DOWN
XM_005693218.3	3.69165	2.83973	3.43396	0.00141447	0.0274612	-1.10057	UP
MSTRG.9805.14	1.55272	0.575745	3.43367	0.00141561	0.0274629	-1.08784	UP
XM_018058529.1	-3.13372	-0.591241	-3.43287	0.00141882	0.0274886	-1.12301	DOWN
TRNAG-CCC_100	-1.37885	0.518574	-3.43282	0.00141904	0.0274886	-1.14009	DOWN
XM_018062608.1	1.96865	1.37192	3.43239	0.00142075	0.0275012	-1.09558	UP
XM_018057448.1	0.65107	2.0126	3.43202	0.00142224	0.0275037	-1.20215	NOT
MSTRG.12226.12	2.52725	0.499601	3.43179	0.00142318	0.0275037	-1.09191	UP
XM_018046654.1	2.48824	0.397638	3.43135	0.00142496	0.0275037	-1.07885	UP
MSTRG.11568.1	-0.62819	3.346	-3.43129	0.00142521	0.0275037	-1.39426	NOT
XM_005685242.3	-0.781169	3.68439	-3.43105	0.00142615	0.0275037	-1.40099	NOT
XM_018040724.1	1.31634	4.14906	3.43048	0.00142847	0.0275278	-1.35697	UP
MSTRG.8898.1	0.810583	6.40673	3.43022	0.00142951	0.0275278	-1.47608	NOT
XM_018043085.1	-1.21952	2.49395	-3.42987	0.00143094	0.0275351	-1.4186	DOWN
MSTRG.17538.4	-1.9606	-0.447972	-3.42949	0.00143246	0.027544	-1.10618	DOWN
XM_018051954.1	2.08033	-0.189519	3.42794	0.00143877	0.0276449	-1.08309	UP
XM_018060842.1	1.58361	2.6744	3.42687	0.00144314	0.0276923	-1.20027	UP
MSTRG.6529.1	-1.82779	-0.116268	-3.42661	0.00144419	0.0276923	-1.11684	DOWN
XM_018058615.1	-0.892818	1.64388	-3.42655	0.00144442	0.0276923	-1.21878	NOT
XM_018056293.1	4.91851	2.94582	3.42509	0.00145041	0.0277868	-1.13169	UP
MSTRG.15927.2	-2.39714	0.36073	-3.42381	0.00145569	0.0278406	-1.16716	DOWN
XM_018050992.1	-1.03931	0.808859	-3.42363	0.00145641	0.0278406	-1.17764	DOWN
XM_018042788.1	-1.42113	1.94611	-3.42348	0.00145702	0.0278406	-1.33868	DOWN
XM_018043321.1	-1.82563	0.66407	-3.4232	0.00145817	0.0278406	-1.18275	DOWN
MSTRG.3147.4	-2.32829	0.649649	-3.42311	0.00145855	0.0278406	-1.13594	DOWN
XM_005693721.3	-0.585711	4.06362	-3.42215	0.00146253	0.027896	-1.44826	NOT
XR_001919635.1	2.58823	0.618792	3.41952	0.00147342	0.0280832	-1.10926	UP
XM_018044823.1	1.48548	2.1802	3.41794	0.00148002	0.0281573	-1.25177	UP
XM_018064384.1	2.82806	3.46034	3.4178	0.0014806	0.0281573	-1.2181	UP
XM_018051284.1	2.12873	0.359056	3.41771	0.001481	0.0281573	-1.16605	UP
XM_018051339.1	2.12519	0.055014	3.41756	0.00148162	0.0281573	-1.10953	UP
XM_005693032.3	-0.815229	10.0781	-3.41714	0.00148336	0.0281698	-1.5519	NOT
XM_018048817.1	2.97467	1.59952	3.41635	0.00148669	0.0281892	-1.13281	UP
XM_018063300.1	-2.22563	-0.400783	-3.4162	0.00148733	0.0281892	-1.14522	DOWN
MSTRG.5941.2	2.21477	0.628674	3.41613	0.00148762	0.0281892	-1.16602	UP
XM_018055205.1	0.506845	3.20619	3.4155	0.00149024	0.0282036	-1.36601	NOT
XM_005695063.3	1.86841	1.21256	3.41543	0.00149054	0.0282036	-1.12173	UP
XM_018049806.1	1.48816	1.42074	3.41443	0.0014948	0.0282635	-1.13467	UP
XM_018054087.1	-0.8475	3.77799	-3.41388	0.0014971	0.028273	-1.47484	NOT
MSTRG.5022.1	1.99659	0.617732	3.41379	0.00149746	0.028273	-1.13189	UP
XM_018060017.1	-1.714	-0.491698	-3.41317	0.00150012	0.0283027	-1.14091	DOWN
XM_018050365.1	-0.967129	1.47033	-3.41265	0.00150232	0.0283057	-1.25627	NOT
XM_005688519.3	-1.43965	2.41076	-3.41262	0.00150245	0.0283057	-1.31597	DOWN
XM_005675152.3	-2.42257	5.55473	-3.41168	0.00150641	0.0283573	-1.53876	DOWN
XM_013968582.2	2.12725	0.0431747	3.41146	0.00150736	0.0283573	-1.13058	UP
XM_018056266.1	-1.73593	0.194544	-3.41089	0.00150979	0.0283826	-1.14935	DOWN
XM_018057458.1	2.2489	3.91207	3.40975	0.00151467	0.0284538	-1.31358	UP
XM_013972340.2	1.98587	2.2296	3.40939	0.0015162	0.0284621	-1.20106	UP
MSTRG.10350.1	-2.09598	2.75473	-3.40772	0.00152337	0.0285729	-1.39915	DOWN
XM_018052214.1	5.0713	3.76042	3.4075	0.0015243	0.0285729	-1.17439	UP
MSTRG.17823.1	-1.7704	1.28373	-3.40691	0.00152683	0.0285999	-1.23639	DOWN
XM_018063775.1	2.35365	1.54907	3.40659	0.00152823	0.0286056	-1.1448	UP
XM_005698817.3	-1.03711	1.37063	-3.4057	0.00153208	0.028657	-1.24489	DOWN
MSTRG.3772.1	2.96005	1.44522	3.40452	0.00153717	0.0287316	-1.1594	UP
MSTRG.8731.2	1.8677	0.793987	3.40416	0.00153876	0.0287408	-1.14612	UP
MSTRG.8981.1	-1.26336	1.94423	-3.40361	0.00154112	0.0287552	-1.32897	DOWN
NM_001285624.1	-5.83531	1.66552	-3.40332	0.00154241	0.0287552	-1.27092	DOWN
XM_005686514.3	-1.99854	1.91917	-3.40322	0.00154284	0.0287552	-1.33428	DOWN
XM_005679460.3	1.11324	1.90406	3.40222	0.00154717	0.0287913	-1.22101	UP
MSTRG.10449.9	2.24753	1.09735	3.40218	0.00154736	0.0287913	-1.17481	UP
XM_018050555.1	-0.737126	10.7472	-3.40181	0.00154898	0.0287913	-1.59567	NOT
XM_018065403.1	-2.26367	0.434235	-3.40176	0.00154919	0.0287913	-1.19758	DOWN
XM_018041841.1	-1.0007	1.30601	-3.4011	0.00155207	0.0288243	-1.27807	DOWN
MSTRG.17729.1	-3.30546	0.331266	-3.40001	0.00155686	0.0288926	-1.24572	DOWN
XM_018038995.1	3.431	1.45939	3.39956	0.00155882	0.0289085	-1.17631	UP
XM_005696778.3	1.56342	0.552709	3.39712	0.0015696	0.0290644	-1.16387	UP
XM_018064134.1	2.05325	-0.0960777	3.397	0.00157013	0.0290644	-1.15964	UP
XM_018054778.1	-0.783033	4.16629	-3.3969	0.00157057	0.0290644	-1.52333	NOT
MSTRG.4715.1	2.0407	9.68211	3.39561	0.00157627	0.0291299	-1.60451	UP
XM_005679090.3	-0.916196	2.68603	-3.3956	0.00157634	0.0291299	-1.44496	NOT
XM_018046259.1	-0.970865	0.465933	-3.39487	0.00157957	0.0291489	-1.22194	NOT
XR_001296443.2	2.10402	1.34314	3.39486	0.0015796	0.0291489	-1.17809	UP
XM_018042364.1	2.15636	-0.0477156	3.39453	0.00158108	0.0291556	-1.17304	UP
XM_005678436.3	1.02521	3.14739	3.39372	0.0015847	0.0292016	-1.43045	UP
XM_005689163.3	1.28628	0.51419	3.39292	0.0015883	0.0292473	-1.16604	UP
MSTRG.10843.3	1.26094	1.85409	3.39129	0.00159558	0.0293607	-1.26837	UP
MSTRG.6534.5	3.4323	0.618674	3.39098	0.00159696	0.0293654	-1.19781	UP
MSTRG.224.2	1.84995	1.97841	3.39034	0.00159988	0.0293681	-1.23592	UP
MSTRG.6972.1	-1.42695	1.77489	-3.39005	0.00160116	0.0293681	-1.51697	DOWN
XM_018050711.1	-0.826115	5.42954	-3.38999	0.00160142	0.0293681	-1.58342	NOT
MSTRG.14181.1	-2.52124	-0.219052	-3.38995	0.00160161	0.0293681	-1.21382	DOWN
XR_310578.2	-1.04001	5.86132	-3.38948	0.00160375	0.0293867	-1.58938	DOWN
MSTRG.4840.2	-1.6673	0.699428	-3.38872	0.00160717	0.0294234	-1.25581	DOWN
MSTRG.2177.6	1.30298	1.25535	3.38851	0.00160814	0.0294234	-1.21745	UP
XM_013972213.2	1.59853	1.60485	3.38829	0.00160914	0.0294234	-1.23709	UP
XM_005679496.3	1.88001	-0.18353	3.38802	0.00161035	0.029425	-1.17954	UP
XM_018047491.1	0.784909	3.85108	3.38759	0.0016123	0.0294401	-1.48791	NOT
MSTRG.5658.3	-2.52548	0.673426	-3.38654	0.00161706	0.0295063	-1.2646	DOWN
XM_005675284.3	-1.87609	0.893678	-3.38605	0.0016193	0.0295265	-1.29757	DOWN
XM_018049814.1	-1.10425	0.761255	-3.38552	0.00162173	0.0295437	-1.2577	DOWN
XM_018063082.1	1.86101	4.50354	3.38535	0.00162251	0.0295437	-1.48599	UP
XM_018044680.1	1.71817	2.2518	3.38383	0.00162945	0.0296494	-1.23373	UP
MSTRG.17854.1	-0.915202	2.91055	-3.38307	0.00163295	0.0296925	-1.48351	NOT
MSTRG.15835.12	2.34919	0.162923	3.38215	0.00163717	0.0297484	-1.20939	UP
MSTRG.2292.1	-1.68462	-0.462875	-3.38007	0.00164679	0.0299023	-1.21977	DOWN
MSTRG.5231.4	-1.23923	0.946191	-3.37888	0.00165232	0.029968	-1.34176	DOWN
MSTRG.14335.2	1.25012	1.57837	3.37879	0.0016527	0.029968	-1.2892	UP
XM_018047176.1	-2.18862	0.0804153	-3.37747	0.00165888	0.0300592	-1.25662	DOWN
XM_018063369.1	-1.65877	1.43117	-3.37556	0.00166779	0.0301948	-1.38848	DOWN
MSTRG.13563.5	1.84567	1.64207	3.37521	0.00166945	0.0301948	-1.23783	UP
MSTRG.3004.10	-2.0813	-0.2299	-3.37496	0.00167062	0.0301948	-1.24753	DOWN
MSTRG.5493.1	-2.13235	-0.399881	-3.37488	0.001671	0.0301948	-1.26037	DOWN
XM_018058801.1	2.58022	2.55531	3.37405	0.0016749	0.0302444	-1.27629	UP
XM_018064381.1	3.60897	5.61827	3.37307	0.00167949	0.0302922	-1.48709	UP
XM_005677359.3	3.47034	4.56516	3.37299	0.00167987	0.0302922	-1.4782	UP
XM_018054432.1	1.91649	2.09955	3.37251	0.00168214	0.0303122	-1.33882	UP
MSTRG.7069.1	2.60868	1.93545	3.37167	0.00168613	0.0303632	-1.33815	UP
MSTRG.741.1	-2.15453	0.196248	-3.37078	0.00169034	0.030418	-1.30082	DOWN
XM_005690119.3	0.87562	2.38698	3.3703	0.0016926	0.0304215	-1.40732	NOT
XR_001917890.1	-1.2316	1.61218	-3.36995	0.00169427	0.0304215	-1.36139	DOWN
MSTRG.4009.1	1.50488	1.76679	3.36988	0.0016946	0.0304215	-1.2745	UP
XM_018050158.1	1.61564	7.56607	3.36976	0.0016952	0.0304215	-1.64315	UP
MSTRG.10016.7	2.28332	0.305782	3.36949	0.0016965	0.0304239	-1.24547	UP
XM_018041566.1	-2.094	0.592461	-3.36923	0.00169774	0.0304252	-1.37356	DOWN
XM_005696729.1	-2.20771	0.0827368	-3.36892	0.00169922	0.0304308	-1.26904	DOWN
MSTRG.1025.1	-1.7108	-0.720675	-3.3686	0.00170071	0.0304342	-1.25439	DOWN
XM_018041803.1	-1.82063	-0.923501	-3.36839	0.00170174	0.0304342	-1.24211	DOWN
MSTRG.17385.1	-1.23233	1.03515	-3.36704	0.00170819	0.0305041	-1.31749	DOWN
MSTRG.11185.1	-1.06385	1.01774	-3.36684	0.00170915	0.0305041	-1.30841	DOWN
XM_005676710.3	-0.934027	6.41428	-3.36684	0.00170916	0.0305041	-1.65687	NOT
XM_018066514.1	3.02205	3.23612	3.36607	0.00171286	0.030548	-1.26982	UP
MSTRG.4099.1	-1.69716	0.861948	-3.36584	0.00171396	0.030548	-1.38196	DOWN
MSTRG.6148.11	-1.90532	-0.394678	-3.3652	0.00171701	0.0305794	-1.26811	DOWN
XM_005696367.3	2.4739	0.335849	3.36496	0.00171821	0.0305794	-1.25633	UP
XR_310799.3	2.46107	0.388803	3.36428	0.00172149	0.0305794	-1.24539	UP
XM_018054925.1	-1.25661	2.29529	-3.36427	0.00172152	0.0305794	-1.47556	DOWN
XM_018064531.1	0.811411	4.66031	3.36426	0.00172158	0.0305794	-1.56551	NOT
XM_018043018.1	0.557039	3.46279	3.36382	0.00172368	0.0305805	-1.51394	NOT
XM_018051955.1	2.23573	-0.121773	3.36376	0.00172398	0.0305805	-1.24424	UP
MSTRG.2908.3	-2.82674	2.48005	-3.36341	0.00172567	0.0305896	-1.48935	DOWN
XM_013973137.2	2.93312	0.391856	3.36316	0.0017269	0.0305907	-1.25843	UP
XM_018057642.1	3.11176	4.89005	3.3624	0.00173056	0.0306142	-1.48195	UP
XM_018046614.1	-3.01279	4.40424	-3.3624	0.00173058	0.0306142	-1.65999	DOWN
XM_018059343.1	1.48069	1.58503	3.36068	0.00173894	0.0307146	-1.29694	UP
XM_018060599.1	1.14914	1.39015	3.36031	0.00174077	0.0307146	-1.26665	UP
XR_001919526.1	1.86216	1.64237	3.36022	0.00174121	0.0307146	-1.28022	UP
XM_018040648.1	-1.61263	1.47422	-3.36016	0.00174147	0.0307146	-1.38617	DOWN
MSTRG.6079.5	-1.7265	-0.633392	-3.36003	0.00174214	0.0307146	-1.27805	DOWN
XM_018049538.1	3.90603	1.77361	3.35928	0.00174579	0.0307582	-1.35718	UP
XM_018067077.1	-1.14846	2.85959	-3.35875	0.00174839	0.0307832	-1.52976	DOWN
TRNAG-GCC_15	-2.15929	1.43192	-3.35768	0.00175366	0.0308475	-1.43947	DOWN
MSTRG.14711.11	2.52857	0.00535018	3.35753	0.0017544	0.0308475	-1.26847	UP
XM_018059686.1	-1.87316	1.52216	-3.35644	0.00175977	0.0308928	-1.45977	DOWN
XM_018051898.1	1.52217	0.59301	3.35636	0.00176017	0.0308928	-1.25979	UP
MSTRG.5601.7	-1.55101	2.50507	-3.35628	0.00176053	0.0308928	-1.45536	DOWN
XM_018052720.1	-0.947749	10.395	-3.35523	0.00176572	0.0309531	-1.71748	NOT
XM_018053328.1	3.11926	1.26161	3.35471	0.00176832	0.0309531	-1.29496	UP
XM_018041469.1	2.37088	0.174837	3.35471	0.00176834	0.0309531	-1.2681	UP
MSTRG.5327.1	-1.20282	2.07774	-3.35463	0.00176871	0.0309531	-1.45857	DOWN
XM_005700869.3	-0.717408	6.24679	-3.35419	0.00177087	0.0309636	-1.68779	NOT
XM_005678199.3	1.71293	2.01501	3.35403	0.00177169	0.0309636	-1.31741	UP
MSTRG.1290.2	1.58226	2.16253	3.35346	0.00177451	0.0309863	-1.3316	UP
XM_018057821.1	1.11458	4.42135	3.35329	0.00177536	0.0309863	-1.58324	UP
XM_018047655.1	1.3632	0.840548	3.35241	0.00177975	0.0310421	-1.27163	UP
XM_005684855.3	2.62225	1.53199	3.35048	0.00178938	0.0311747	-1.3002	UP
MSTRG.17916.1	-0.917176	2.10987	-3.35027	0.00179046	0.0311747	-1.53105	NOT
XR_001917685.1	3.44925	3.57784	3.35017	0.00179093	0.0311747	-1.31238	UP
XM_005675050.3	-2.36638	2.15196	-3.34907	0.00179646	0.0312356	-1.53071	DOWN
XM_018042873.1	2.60189	2.29516	3.349	0.00179683	0.0312356	-1.35134	UP
XM_005692412.3	3.21955	2.366	3.34857	0.00179901	0.0312527	-1.30166	UP
TRNAG-GCC_14	-2.36391	1.37899	-3.34814	0.00180117	0.0312695	-1.46123	DOWN
XM_013972407.2	1.86068	2.01076	3.34743	0.00180477	0.0312931	-1.32718	UP
XM_018039452.1	-0.721494	1.97086	-3.34713	0.00180625	0.0312931	-1.44104	NOT
XM_018055772.1	2.36891	-0.0412576	3.34674	0.00180823	0.0312931	-1.28775	UP
XM_018046181.1	2.26729	3.10347	3.3467	0.00180846	0.0312931	-1.415	UP
TRNAG-GCC_26	-2.00118	-0.905112	-3.34668	0.00180853	0.0312931	-1.30411	DOWN
XM_005709665.3	-0.919585	2.54246	-3.34637	0.00181012	0.0312998	-1.50299	NOT
XM_018043925.1	2.33001	3.77768	3.34604	0.0018118	0.0313018	-1.54549	UP
XM_005692647.2	-0.58758	5.7384	-3.34588	0.00181263	0.0313018	-1.69617	NOT
XM_005694468.3	1.63288	1.68808	3.34509	0.00181663	0.0313501	-1.34662	UP
MSTRG.1772.14	1.96562	0.36097	3.3442	0.00182113	0.0313808	-1.30489	UP
MSTRG.17915.2	-1.59394	-0.451317	-3.3441	0.00182167	0.0313808	-1.30537	DOWN
XM_018053738.1	2.45965	0.0733528	3.34403	0.00182202	0.0313808	-1.2954	UP
MSTRG.181.1	-1.00214	0.748813	-3.34365	0.00182397	0.0313938	-1.38029	DOWN
XM_013963947.2	1.64043	3.90078	3.3429	0.00182779	0.0314386	-1.55872	UP
XM_018047172.1	-1.2128	0.973634	-3.34239	0.00183039	0.0314626	-1.42003	DOWN
XM_005680735.3	1.77671	0.972782	3.34211	0.00183186	0.0314672	-1.30283	UP
XM_005676346.3	2.57287	1.69762	3.34157	0.00183461	0.0314889	-1.32183	UP
XM_018046219.1	2.41696	0.246625	3.34139	0.00183553	0.0314889	-1.30144	UP
XM_018039131.1	1.96675	0.590558	3.34098	0.00183766	0.0315046	-1.34621	UP
XM_013969889.2	-0.665091	5.34498	-3.33998	0.00184277	0.0315715	-1.71459	NOT
XM_005676180.3	1.91531	0.933927	3.33962	0.00184464	0.0315717	-1.29927	UP
XM_018056562.1	1.55302	1.12595	3.33914	0.00184711	0.0315717	-1.36027	UP
XM_018053507.1	-0.917159	1.38749	-3.33905	0.0018476	0.0315717	-1.42987	NOT
MSTRG.16147.1	1.13951	2.18867	3.33904	0.00184762	0.0315717	-1.40665	UP
XM_018058034.1	2.75354	0.336145	3.33864	0.00184968	0.0315863	-1.31152	UP
MSTRG.747.1	1.56865	0.784488	3.33819	0.00185203	0.0316057	-1.3268	UP
XM_018051193.1	1.73841	4.60886	3.33735	0.00185638	0.0316591	-1.65521	UP
XM_018048030.1	3.73924	3.663	3.33625	0.00186212	0.0317363	-1.37044	UP
XM_018059698.1	2.77737	0.068995	3.33577	0.00186463	0.0317493	-1.31883	UP
XM_018066114.1	2.08499	1.16697	3.3356	0.00186553	0.0317493	-1.33271	UP
MSTRG.10252.2	1.66288	1.84804	3.3354	0.00186653	0.0317493	-1.37154	UP
XM_013969213.2	1.71235	2.18895	3.33491	0.00186909	0.0317716	-1.42131	UP
XM_005684327.3	-0.52987	4.09247	-3.33469	0.00187028	0.0317716	-1.68386	NOT
XM_005686014.3	1.00236	1.98125	3.33306	0.00187883	0.031896	-1.47181	UP
XM_005682744.3	2.19119	0.725362	3.33222	0.00188322	0.0319461	-1.33903	UP
XM_018060965.1	-1.99561	-0.270562	-3.33203	0.00188422	0.0319461	-1.35417	DOWN
XM_018048523.1	1.17528	2.08536	3.33156	0.00188667	0.0319668	-1.4555	UP
XM_005693239.3	3.04907	1.82201	3.33093	0.00189004	0.0319923	-1.3395	UP
XM_013963552.2	1.99141	0.68361	3.33081	0.00189063	0.0319923	-1.32909	UP
XM_018048862.1	2.87514	1.47891	3.33028	0.00189346	0.0320195	-1.33329	UP
XM_018051192.1	2.23831	0.579462	3.32962	0.00189693	0.0320574	-1.33464	UP
MSTRG.3862.1	2.22928	2.38831	3.32696	0.00191108	0.0322757	-1.41385	UP
MSTRG.17750.1	-1.76018	1.24689	-3.32655	0.00191328	0.0322918	-1.4347	DOWN
XM_018056058.1	1.77402	-0.0881468	3.32571	0.00191781	0.0323473	-1.33123	UP
MSTRG.12703.1	3.33385	1.33737	3.32542	0.00191932	0.0323519	-1.36608	UP
XM_018054885.1	2.20583	-0.101163	3.32515	0.00192077	0.0323555	-1.33896	UP
MSTRG.11925.12	-4.77902	1.62131	-3.3249	0.00192211	0.0323572	-1.48541	DOWN
MSTRG.2388.1	-2.04871	2.68503	-3.32431	0.00192532	0.0323902	-1.70665	DOWN
XM_018044299.1	-1.3697	0.942492	-3.32363	0.00192897	0.0324308	-1.44541	DOWN
MSTRG.10836.2	1.96109	2.18417	3.32299	0.0019324	0.0324676	-1.38409	UP
XM_005685131.3	3.52627	10.4049	3.32214	0.00193701	0.032524	-1.79825	UP
XM_018042891.1	2.00688	2.78897	3.32025	0.00194725	0.0326393	-1.4883	UP
XM_018039795.1	1.1941	0.313043	3.31995	0.00194887	0.0326393	-1.34406	UP
XM_018041169.1	-0.807119	0.720008	-3.31971	0.0019502	0.0326393	-1.45672	NOT
XM_018050440.1	1.35671	1.95137	3.31929	0.00195249	0.0326393	-1.46405	UP
XM_018051863.1	-0.954015	1.61817	-3.31905	0.0019538	0.0326393	-1.48829	NOT
XM_018045398.1	1.40987	0.908676	3.31902	0.00195396	0.0326393	-1.3605	UP
XM_013962747.2	2.47101	-0.0617295	3.31882	0.00195504	0.0326393	-1.35757	UP
MSTRG.7384.6	-2.15907	-0.664236	-3.3187	0.00195568	0.0326393	-1.37929	DOWN
MSTRG.16324.4	-0.929049	1.94049	-3.3183	0.00195786	0.0326393	-1.53068	NOT
MSTRG.13144.1	-1.5082	2.59603	-3.31815	0.00195868	0.0326393	-1.60028	DOWN
XM_018066747.1	4.04425	3.10375	3.31814	0.00195873	0.0326393	-1.39355	UP
MSTRG.4764.5	-0.992773	3.72639	-3.31811	0.00195888	0.0326393	-1.72682	NOT
XM_018038546.1	-2.86034	0.467066	-3.31777	0.00196075	0.0326495	-1.42617	DOWN
MSTRG.4213.1	-2.6247	0.0960562	-3.3143	0.00197981	0.0329459	-1.4297	DOWN
MSTRG.3428.3	-0.950166	1.90929	-3.31285	0.00198784	0.0330167	-1.54341	NOT
MSTRG.17856.1	-1.74631	1.2344	-3.31276	0.00198838	0.0330167	-1.46901	DOWN
XM_018043946.1	2.40829	0.29523	3.31258	0.00198934	0.0330167	-1.39347	UP
MSTRG.15278.8	-2.11	1.95955	-3.31241	0.00199027	0.0330167	-1.61175	DOWN
XM_018049704.1	1.51386	0.990906	3.31239	0.00199039	0.0330167	-1.43819	UP
XM_018046885.1	0.568383	4.00221	3.31167	0.00199443	0.0330626	-1.72175	NOT
XR_001917259.1	-2.29697	1.0055	-3.3111	0.00199756	0.0330935	-1.4845	DOWN
XM_018044489.1	-1.19039	3.18545	-3.30988	0.00200438	0.0331854	-1.69125	DOWN
XM_005695907.3	-1.832	1.81895	-3.30865	0.00201126	0.0332782	-1.55625	DOWN
MSTRG.14123.8	1.19149	2.90822	3.30757	0.00201733	0.0333447	-1.61579	UP
MSTRG.17505.1	-1.29748	2.21276	-3.30748	0.00201783	0.0333447	-1.59261	DOWN
XM_018040963.1	2.03628	0.148876	3.30685	0.00202137	0.033382	-1.38144	UP
XM_018063753.1	2.44895	3.74553	3.30589	0.0020268	0.0334169	-1.57954	UP
XM_018040517.1	-0.496495	4.59256	-3.30574	0.00202761	0.0334169	-1.78049	NOT
XM_005686262.3	-0.702758	7.06087	-3.30574	0.00202764	0.0334169	-1.82368	NOT
XM_018062583.1	2.74423	0.340848	3.30537	0.00202975	0.0334169	-1.39334	UP
MSTRG.17870.1	-2.1727	1.58961	-3.30499	0.00203188	0.0334169	-1.51835	DOWN
XM_005680696.3	1.50148	0.747586	3.30487	0.00203253	0.0334169	-1.394	UP
XR_001917509.1	-2.11528	1.35478	-3.30433	0.00203559	0.0334169	-1.62445	DOWN
MSTRG.1338.1	-1.69598	-0.7132	-3.30433	0.0020356	0.0334169	-1.41118	DOWN
XM_018041833.1	3.00045	1.90377	3.30421	0.0020363	0.0334169	-1.40931	UP
XM_018046423.1	3.2573	1.52414	3.30398	0.0020376	0.0334169	-1.42426	UP
XM_005676867.3	-2.21752	0.320204	-3.30388	0.00203818	0.0334169	-1.43639	DOWN
XM_013962440.2	1.7287	-0.340749	3.30376	0.00203885	0.0334169	-1.38411	UP
XM_018052721.1	-2.02403	0.160091	-3.30336	0.00204111	0.0334256	-1.46848	DOWN
XM_005682722.3	1.88419	1.58564	3.30297	0.00204336	0.0334256	-1.40587	UP
XM_018039406.1	2.5925	0.242143	3.30291	0.0020437	0.0334256	-1.40396	UP
XM_013973420.2	1.31884	1.15057	3.30276	0.0020445	0.0334256	-1.39902	UP
MSTRG.14706.5	1.24397	3.37519	3.30173	0.00205038	0.0335007	-1.65038	UP
XM_005694073.2	1.63307	0.582915	3.30091	0.00205511	0.0335289	-1.40561	UP
XM_018047247.1	1.62202	1.13088	3.30089	0.0020552	0.0335289	-1.40219	UP
NM_001285741.1	1.7806	2.8525	3.30076	0.00205596	0.0335289	-1.47939	UP
XM_018047602.1	-1.65662	1.14117	-3.30017	0.00205934	0.033563	-1.66673	DOWN
MSTRG.10453.4	2.23228	0.299127	3.29943	0.00206357	0.0335832	-1.40232	UP
XM_018060165.1	2.14931	2.20235	3.29938	0.00206386	0.0335832	-1.51512	UP
XM_018040167.1	3.74925	3.66412	3.29928	0.00206444	0.0335832	-1.44145	UP
XM_018040666.1	0.68357	3.62765	3.29902	0.00206595	0.0335868	-1.72753	NOT
XM_018057245.1	-0.798206	3.13602	-3.29879	0.00206725	0.033587	-1.69527	NOT
XM_018066331.1	2.42821	0.216377	3.2984	0.00206948	0.033593	-1.41749	UP
XM_005697871.3	-0.765205	6.86461	-3.29828	0.00207019	0.033593	-1.84132	NOT
XM_018051950.1	2.49008	0.650516	3.29724	0.00207619	0.0336593	-1.42103	UP
XM_018048201.1	-1.0414	1.53232	-3.29712	0.00207686	0.0336593	-1.55625	DOWN
XM_018041826.1	3.02377	1.1789	3.29628	0.00208176	0.0337178	-1.42475	UP
XM_018051834.1	1.22652	0.379603	3.29569	0.00208519	0.0337523	-1.41481	UP
XM_018061121.1	0.649866	3.65188	3.29512	0.00208847	0.0337846	-1.72215	NOT
XM_018065383.1	1.2419	1.0334	3.29463	0.00209131	0.0338095	-1.43037	UP
MSTRG.13063.4	-1.94537	-0.10471	-3.29431	0.00209317	0.0338186	-1.44815	DOWN
XM_018053157.1	1.62266	3.80668	3.2932	0.00209966	0.0339024	-1.62837	UP
XM_005678443.3	-0.611476	4.17308	-3.29182	0.00210774	0.0340118	-1.80172	NOT
XM_013969355.2	-0.828786	8.78362	-3.29067	0.00211447	0.0340931	-1.876	NOT
XM_018061553.1	4.09877	4.04876	3.29051	0.00211539	0.0340931	-1.46394	UP
XM_005689508.3	1.51535	4.71377	3.29015	0.00211751	0.0340979	-1.72296	UP
XM_018051613.1	-3.0869	0.35052	-3.29002	0.0021183	0.0340979	-1.56832	DOWN
XM_018042218.1	2.91295	1.35324	3.28927	0.00212269	0.0341291	-1.43445	UP
MSTRG.17853.1	-1.79041	1.29262	-3.28925	0.00212285	0.0341291	-1.53014	DOWN
MSTRG.16986.1	-2.21244	0.234596	-3.28807	0.00212981	0.0342198	-1.50506	DOWN
XM_018040323.1	1.413	0.741256	3.28783	0.00213121	0.0342213	-1.44258	UP
MSTRG.2099.5	-2.04129	0.203504	-3.28747	0.00213334	0.0342224	-1.47673	DOWN
XM_005686574.3	-0.937143	6.95461	-3.28738	0.0021339	0.0342224	-1.86732	NOT
MSTRG.3751.1	-1.09833	3.13765	-3.28647	0.00213931	0.0342881	-1.78518	DOWN
MSTRG.8277.4	-1.75967	-0.489336	-3.28592	0.0021426	0.0343197	-1.46174	DOWN
XM_018040190.1	3.26313	0.786664	3.2855	0.0021451	0.0343386	-1.44728	UP
MSTRG.2501.25	2.65256	2.19931	3.28456	0.00215065	0.0344065	-1.45718	UP
XM_018050557.1	2.23305	2.57892	3.28328	0.00215831	0.0345079	-1.53351	UP
MSTRG.2339.18	-2.75842	2.20712	-3.28296	0.00216025	0.0345177	-1.74348	DOWN
MSTRG.5388.1	-1.81138	-0.618379	-3.28264	0.00216219	0.0345275	-1.47348	DOWN
MSTRG.3853.1	-1.52016	0.27196	-3.2824	0.0021636	0.0345289	-1.48766	DOWN
MSTRG.1842.2	-1.81537	0.798621	-3.28154	0.00216877	0.0345902	-1.54165	DOWN
XM_018040376.1	1.11399	3.37902	3.28089	0.00217272	0.0346267	-1.69817	UP
MSTRG.8646.1	-0.722244	1.73724	-3.28072	0.00217371	0.0346267	-1.61921	NOT
XM_018055567.1	-1.19538	0.773435	-3.27969	0.00217997	0.0347052	-1.52026	DOWN
MSTRG.4516.2	-2.19301	-0.311502	-3.27946	0.00218138	0.0347065	-1.47748	DOWN
XM_013967250.2	6.27966	4.74008	3.27899	0.00218421	0.0347303	-1.50736	UP
XM_005696581.3	0.534892	4.53229	3.27839	0.00218781	0.0347664	-1.83024	NOT
XM_018050976.1	2.3524	1.30039	3.27812	0.00218947	0.0347717	-1.47222	UP
MSTRG.11579.3	-2.46876	-0.475133	-3.27699	0.00219638	0.0348356	-1.51301	DOWN
XR_001918247.1	-1.64984	1.04939	-3.27685	0.0021972	0.0348356	-1.7517	DOWN
XM_018065940.1	0.86789	1.41691	3.27662	0.00219864	0.0348356	-1.5388	NOT
MSTRG.9007.2	-2.02135	0.420552	-3.27658	0.00219884	0.0348356	-1.64928	DOWN
XM_018050928.1	-0.621863	3.59259	-3.27615	0.0022015	0.0348567	-1.78672	NOT
XM_005684574.3	2.49052	0.308025	3.27526	0.00220692	0.0348783	-1.48085	UP
XM_018058350.1	1.56385	0.420552	3.27506	0.00220816	0.0348783	-1.45957	UP
XM_005678142.3	-0.709966	4.56286	-3.27447	0.00221179	0.0348783	-1.86084	NOT
XM_018045733.1	1.48434	0.196204	3.27437	0.00221235	0.0348783	-1.45185	UP
XM_013976656.2	1.76315	1.82871	3.27427	0.00221296	0.0348783	-1.4966	UP
MSTRG.7511.1	-2.00581	0.750427	-3.27414	0.00221379	0.0348783	-1.62133	DOWN
MSTRG.3648.2	-1.52344	2.39569	-3.27412	0.00221393	0.0348783	-1.77816	DOWN
MSTRG.9063.4	1.8965	0.719948	3.27401	0.00221461	0.0348783	-1.46718	UP
XM_018055942.1	2.22183	0.905801	3.27396	0.0022149	0.0348783	-1.47524	UP
XM_018058377.1	1.55483	3.36174	3.27322	0.00221942	0.0349285	-1.64507	UP
MSTRG.14119.10	-2.81983	1.15255	-3.27228	0.00222521	0.0349984	-1.59813	DOWN
MSTRG.16118.3	-3.28119	1.63963	-3.27183	0.002228	0.0350211	-1.58943	DOWN
XM_018041256.1	-0.998925	1.91376	-3.27119	0.00223198	0.0350627	-1.63338	NOT
XM_018057732.1	2.27772	-0.0760259	3.26961	0.00224177	0.0351817	-1.47567	UP
XM_018065794.1	-1.09441	3.34774	-3.26953	0.00224226	0.0351817	-1.83435	DOWN
MSTRG.11930.5	2.50871	0.169024	3.26893	0.00224598	0.0352189	-1.48638	UP
XM_005693313.3	0.530508	5.28982	3.26835	0.00224961	0.0352546	-1.88631	NOT
MSTRG.406.3	-1.76318	-0.291454	-3.26801	0.00225171	0.0352664	-1.48665	DOWN
MSTRG.16029.1	-1.69052	-0.122257	-3.26713	0.00225722	0.0353315	-1.52206	DOWN
NM_001285646.1	1.66929	1.26099	3.26686	0.00225894	0.0353373	-1.49729	UP
XM_005683188.3	0.959847	5.14075	3.26569	0.00226624	0.0354303	-1.83375	NOT
MSTRG.16962.5	-2.31412	-0.147526	-3.26507	0.00227013	0.0354698	-1.52524	DOWN
XM_018059240.1	-1.51356	0.728255	-3.26481	0.00227179	0.0354744	-1.59717	DOWN
XM_018045292.1	2.20485	1.31118	3.26289	0.0022839	0.0356422	-1.49789	UP
XM_005694710.3	2.68142	3.03485	3.26228	0.00228777	0.0356639	-1.58419	UP
MSTRG.15885.5	2.01812	0.214734	3.26211	0.00228885	0.0356639	-1.49016	UP
XM_018053021.1	1.61527	2.26472	3.26202	0.00228939	0.0356639	-1.59394	UP
XR_001296855.2	-0.898793	1.43209	-3.2615	0.00229273	0.03569	-1.63801	NOT
MSTRG.13078.1	-2.93531	-0.229852	-3.26133	0.0022938	0.03569	-1.59071	DOWN
MSTRG.9805.15	1.51624	0.452997	3.26107	0.00229542	0.0356932	-1.51641	UP
XM_018055392.1	2.40737	1.90589	3.26087	0.00229674	0.0356932	-1.5224	UP
XM_018040112.1	1.43469	3.4744	3.26032	0.00230024	0.0357263	-1.76112	UP
MSTRG.3669.6	2.53727	0.473456	3.25975	0.00230383	0.0357608	-1.5027	UP
XM_018042326.1	0.684162	4.47422	3.25916	0.00230763	0.0357984	-1.85273	NOT
XM_018039780.1	-1.43323	1.38082	-3.25857	0.00231141	0.0358358	-1.58564	DOWN
XM_018051080.1	1.84338	0.373198	3.25729	0.00231957	0.0359308	-1.52987	UP
MSTRG.8185.2	-0.943704	1.25285	-3.25718	0.00232029	0.0359308	-1.64281	NOT
MSTRG.5285.1	-3.40127	2.01387	-3.25599	0.00232793	0.0360054	-1.63036	DOWN
MSTRG.2818.2	2.0035	1.35702	3.25593	0.00232832	0.0360054	-1.53525	UP
XM_018065482.1	-1.27042	1.09454	-3.25579	0.00232925	0.0360054	-1.61088	DOWN
MSTRG.13530.2	-1.26219	1.69689	-3.25511	0.00233363	0.0360476	-1.64547	DOWN
XM_018066233.1	2.29723	1.01541	3.25492	0.00233488	0.0360476	-1.52582	UP
XM_018061686.1	1.7253	2.38681	3.25463	0.00233672	0.0360476	-1.60319	UP
XR_001917681.1	-1.30332	1.97693	-3.25451	0.00233751	0.0360476	-1.70845	DOWN
MSTRG.16171.77	-2.00579	-0.43493	-3.25264	0.00234962	0.036213	-1.5443	DOWN
MSTRG.15810.1	1.95826	3.22265	3.25178	0.0023552	0.0362775	-1.72002	UP
XM_018061072.1	0.74527	1.79156	3.25132	0.00235819	0.0363023	-1.64438	NOT
XR_310281.3	-1.33831	1.93226	-3.25034	0.00236463	0.0363799	-1.76083	DOWN
XM_018042591.1	1.95898	0.410926	3.25005	0.00236649	0.0363871	-1.51839	UP
XM_018048011.1	1.48775	1.35022	3.24968	0.00236894	0.0363944	-1.55905	UP
XM_018061359.1	2.92735	0.910472	3.24955	0.00236976	0.0363944	-1.53822	UP
XM_018048366.1	-0.854391	3.3032	-3.24855	0.00237637	0.0364532	-1.89331	NOT
XM_018056190.1	1.43081	1.00492	3.24854	0.00237638	0.0364532	-1.56777	UP
XR_311252.3	4.15851	1.60413	3.24821	0.00237859	0.0364656	-1.54751	UP
XM_018045639.1	-1.41403	4.62529	-3.2477	0.00238192	0.0364953	-1.95001	DOWN
MSTRG.17654.1	-1.84976	1.30319	-3.24716	0.00238549	0.0365285	-1.63843	DOWN
MSTRG.1733.5	-1.63123	1.47098	-3.24678	0.00238802	0.0365459	-1.67715	DOWN
XM_018051435.1	1.50202	1.0382	3.24627	0.00239139	0.036576	-1.5745	UP
XM_018044620.1	1.68293	2.166	3.24596	0.00239341	0.0365854	-1.63026	UP
XM_005680921.3	3.86372	4.69647	3.24542	0.00239701	0.0366189	-1.69687	UP
XM_018065361.1	2.79489	1.18017	3.24488	0.00240059	0.0366513	-1.56636	UP
XM_005695793.3	1.74591	0.872826	3.24453	0.00240291	0.0366513	-1.53671	UP
MSTRG.17200.6	7.02823	4.34121	3.24442	0.00240364	0.0366513	-1.63941	UP
XM_018067025.1	-0.951819	2.65151	-3.24405	0.00240606	0.0366513	-1.85078	NOT
XM_018041939.1	1.63853	1.2619	3.2438	0.00240773	0.0366513	-1.54167	UP
XM_005676380.3	1.88719	3.8767	3.24359	0.00240914	0.0366513	-1.75924	UP
XM_005679531.3	-0.822656	4.80906	-3.24352	0.0024096	0.0366513	-1.94548	NOT
XM_018043175.1	1.41966	1.25219	3.2434	0.00241037	0.0366513	-1.59645	UP
XM_018062568.1	2.92748	1.70906	3.24292	0.00241361	0.0366601	-1.55439	UP
XR_311220.2	0.96823	1.08396	3.2429	0.00241375	0.0366601	-1.58986	NOT
XM_005677179.3	2.85233	2.5507	3.2426	0.00241571	0.0366684	-1.59798	UP
MSTRG.1407.1	-1.69598	-0.511266	-3.24185	0.00242072	0.036681	-1.56469	DOWN
MSTRG.80.5	-1.88425	-0.468583	-3.24164	0.00242211	0.036681	-1.55652	DOWN
XM_018059113.1	1.82058	-0.308299	3.24164	0.00242215	0.036681	-1.53634	UP
XM_018065360.1	1.19572	5.05843	3.24164	0.00242216	0.036681	-1.8977	UP
XM_018041717.1	1.87265	1.41291	3.24064	0.00242882	0.0367606	-1.55834	UP
XM_018045460.1	1.95024	1.95073	3.24026	0.00243142	0.0367786	-1.56017	UP
XM_018042298.1	2.46843	3.67866	3.23861	0.00244249	0.0369246	-1.80763	UP
XM_018066403.1	1.20331	1.94694	3.23782	0.00244782	0.0369838	-1.66269	UP
MSTRG.13010.3	-0.930004	1.79144	-3.23571	0.00246211	0.0371782	-1.7441	NOT
MSTRG.5779.1	-1.97167	-0.105456	-3.23544	0.00246393	0.0371841	-1.59844	DOWN
TRNAK-UUU_34	-2.4657	0.0483566	-3.23495	0.00246731	0.0372135	-1.61044	DOWN
XM_013965703.2	2.33644	1.38631	3.23465	0.0024693	0.037222	-1.63371	UP
XM_005678500.3	0.400107	3.78252	3.23331	0.00247849	0.037339	-1.89559	NOT
XM_005694685.3	2.75013	1.38252	3.23268	0.00248279	0.0373822	-1.60283	UP
MSTRG.3946.1	2.00432	-0.17726	3.2323	0.00248538	0.0373996	-1.5621	UP
XM_018062492.1	1.13363	4.63264	3.23162	0.00249007	0.0374097	-1.9506	UP
MSTRG.12237.3	-1.85585	-0.317214	-3.23159	0.00249025	0.0374097	-1.59904	DOWN
MSTRG.9245.3	-2.0412	-0.0071581	-3.23139	0.00249161	0.0374097	-1.60661	DOWN
MSTRG.935.2	0.995123	2.43473	3.23137	0.00249178	0.0374097	-1.70999	NOT
MSTRG.5658.1	2.70547	0.668144	3.23104	0.00249401	0.0374217	-1.58542	UP
XM_005693558.3	-0.759989	9.25939	-3.23081	0.0024956	0.037424	-2.03389	NOT
MSTRG.11131.4	1.25364	1.79278	3.23049	0.00249784	0.0374361	-1.63743	UP
MSTRG.3857.4	-1.68547	0.750229	-3.22994	0.00250164	0.0374714	-1.67607	DOWN
XM_005686030.2	-1.75279	-0.0703185	-3.22925	0.0025064	0.0375212	-1.581	DOWN
XM_018044432.1	-0.782806	1.86468	-3.22896	0.00250839	0.0375296	-1.74168	NOT
XM_018063732.1	-1.87547	2.20353	-3.2284	0.00251223	0.0375654	-1.79781	DOWN
MSTRG.1851.6	-1.76318	-0.487981	-3.22779	0.00251651	0.0376078	-1.58454	DOWN
XM_018063938.1	1.4608	1.22741	3.22697	0.0025222	0.0376713	-1.64982	UP
XM_018061137.1	1.90983	2.06786	3.22568	0.00253114	0.0377831	-1.70025	UP
XM_018047009.1	2.24938	4.99635	3.22514	0.00253489	0.0378176	-1.91397	UP
XR_001296371.2	-0.81051	1.89317	-3.22464	0.00253841	0.0378484	-1.76139	NOT
MSTRG.17159.1	-1.32506	1.05548	-3.22376	0.00254457	0.0378933	-1.67244	DOWN
XM_018041923.1	2.21744	0.168736	3.22335	0.00254749	0.0378933	-1.59415	UP
XM_018064323.1	2.25405	2.5586	3.22333	0.00254761	0.0378933	-1.67456	UP
XM_018041608.1	1.42996	0.964669	3.22331	0.00254775	0.0378933	-1.58245	UP
XM_005687389.3	-0.917956	2.74381	-3.22318	0.00254868	0.0378933	-1.86512	NOT
NM_001286962.1	-0.606202	8.11627	-3.22226	0.00255511	0.0379562	-2.04775	NOT
XR_001917053.1	1.11187	1.38953	3.22216	0.00255582	0.0379562	-1.62562	UP
XM_013973350.2	0.952203	1.01467	3.22163	0.00255952	0.0379753	-1.6419	NOT
XM_018039691.1	1.79035	0.107091	3.22156	0.00256001	0.0379753	-1.59296	UP
XM_005696060.2	-1.15522	3.86319	-3.221	0.00256402	0.0379954	-1.98434	DOWN
XM_018053503.1	1.9739	0.358267	3.22096	0.00256428	0.0379954	-1.58893	UP
XM_005677878.3	3.08399	0.983477	3.22072	0.00256599	0.0379991	-1.61015	UP
XM_018060606.1	2.28297	0.7569	3.21971	0.00257311	0.0380528	-1.60811	UP
XM_018042910.1	1.94755	2.21535	3.2196	0.00257392	0.0380528	-1.62235	UP
XM_005693740.3	-0.880787	9.94838	-3.21959	0.002574	0.0380528	-2.06675	NOT
MSTRG.11711.2	-0.847446	1.17141	-3.21874	0.00258001	0.0381001	-1.68921	NOT
XM_018038639.1	0.53404	4.7714	3.21872	0.00258012	0.0381001	-1.98522	NOT
MSTRG.12580.2	-1.94424	-0.250093	-3.21729	0.00259035	0.0382297	-1.64379	DOWN
XM_005697735.3	1.68618	1.18472	3.21688	0.00259321	0.0382338	-1.60761	UP
XM_018062707.1	2.58059	3.00996	3.21683	0.00259356	0.0382338	-1.6946	UP
XM_018044469.1	2.01821	0.170588	3.21611	0.00259874	0.0382713	-1.61707	UP
MSTRG.10421.1	-3.22754	0.71619	-3.21604	0.00259928	0.0382713	-1.69748	DOWN
MSTRG.5233.2	-2.23632	1.41492	-3.21586	0.00260051	0.0382713	-1.78908	DOWN
XM_018050178.1	1.45407	1.90573	3.21559	0.00260248	0.0382714	-1.67753	UP
XM_018064964.1	1.5624	4.33446	3.21545	0.00260345	0.0382714	-1.87076	UP
XM_005685255.1	-0.539211	5.01432	-3.21456	0.00260988	0.0383357	-2.02711	NOT
XM_018057390.1	0.677929	2.01062	3.21443	0.00261076	0.0383357	-1.74541	NOT
MSTRG.13310.14	7.76003	6.7344	3.21209	0.00262761	0.0385614	-1.75516	UP
XM_018042573.1	-1.93716	-0.23791	-3.21179	0.00262984	0.0385658	-1.6415	DOWN
XM_018047658.1	2.14527	2.51095	3.21164	0.00263087	0.0385658	-1.78139	UP
XM_018041829.1	-1.96592	3.36826	-3.21079	0.00263709	0.0386205	-2.00099	DOWN
XM_005680730.3	-0.754127	5.2301	-3.2105	0.00263918	0.0386205	-2.03996	NOT
XM_018045365.1	-0.510212	4.45184	-3.21043	0.00263969	0.0386205	-2.01668	NOT
XM_018043790.1	1.17099	1.4906	3.21031	0.00264051	0.0386205	-1.67115	UP
XM_018048080.1	1.30325	2.69718	3.20978	0.0026444	0.0386556	-1.8124	UP
MSTRG.11595.2	-2.18388	-0.183402	-3.20814	0.00265634	0.0387884	-1.66878	DOWN
XM_018059370.1	1.82785	1.33442	3.20798	0.00265751	0.0387884	-1.70361	UP
MSTRG.2389.6	-1.81503	0.480618	-3.20778	0.00265894	0.0387884	-1.78732	DOWN
XM_005693305.3	1.6023	1.51419	3.20753	0.00266077	0.0387884	-1.68805	UP
XM_018053354.1	1.48486	0.490655	3.20749	0.00266105	0.0387884	-1.62156	UP
XM_018061757.1	0.930014	1.38061	3.20731	0.0026624	0.0387884	-1.71241	NOT
XM_018057575.1	1.51401	0.902771	3.20637	0.00266926	0.0388666	-1.616	UP
XM_018044524.1	1.40484	0.907638	3.20606	0.00267153	0.0388781	-1.67156	UP
MSTRG.11347.3	-1.57939	-0.582076	-3.20567	0.00267444	0.0388826	-1.63002	DOWN
MSTRG.2122.1	-2.05455	3.1045	-3.20562	0.00267483	0.0388826	-1.95792	DOWN
MSTRG.15031.3	1.50717	1.06917	3.20458	0.00268242	0.0389702	-1.64099	UP
XR_001917400.1	2.43828	3.01034	3.20439	0.00268384	0.0389702	-1.78574	UP
XM_018056520.1	-1.97453	0.0421369	-3.20396	0.00268704	0.038995	-1.69383	DOWN
XM_018041778.1	1.88195	-0.185551	3.20305	0.00269375	0.0390706	-1.63029	UP
XM_018039648.1	2.43446	1.72628	3.20242	0.00269842	0.0391167	-1.65175	UP
XM_018039923.1	2.16668	1.56276	3.20208	0.00270094	0.0391186	-1.669	UP
XM_018063803.1	2.26691	0.22071	3.202	0.00270155	0.0391186	-1.63915	UP
MSTRG.6189.1	-1.34621	2.80271	-3.20121	0.00270737	0.039181	-1.98421	DOWN
MSTRG.7328.5	-3.00667	0.14125	-3.20079	0.00271051	0.0391834	-1.7209	DOWN
XM_018056625.1	-0.603397	4.23562	-3.20062	0.00271177	0.0391834	-2.03985	NOT
XM_018056680.1	1.53765	2.65065	3.20058	0.00271204	0.0391834	-1.83871	UP
XM_005692202.3	-1.57939	-0.357435	-3.19916	0.0027227	0.0393025	-1.64569	DOWN
MSTRG.12228.3	1.48878	0.863445	3.19866	0.0027264	0.0393025	-1.65498	UP
XM_005678152.3	1.40837	1.24515	3.19862	0.00272674	0.0393025	-1.66404	UP
XM_018064581.1	1.34378	3.35933	3.19849	0.00272769	0.0393025	-1.90459	UP
XM_005691176.3	-0.783083	9.04412	-3.19847	0.00272782	0.0393025	-2.11539	NOT
XM_018066646.1	2.65328	0.703698	3.19722	0.00273723	0.0394164	-1.67328	UP
MSTRG.17697.9	-1.59394	-0.497687	-3.19644	0.00274308	0.0394788	-1.66691	DOWN
MSTRG.17206.1	-1.54639	1.13969	-3.1962	0.00274491	0.0394835	-1.75079	DOWN
XM_005679353.3	-0.739965	3.56958	-3.19519	0.00275253	0.0395677	-2.00095	NOT
XM_018050827.1	2.45237	0.993311	3.19501	0.00275385	0.0395677	-1.6699	UP
MSTRG.588.2	0.987944	2.42483	3.19482	0.00275532	0.0395677	-1.81333	NOT
XM_005686511.3	1.17886	2.18593	3.19393	0.00276203	0.039614	-1.82887	UP
MSTRG.8856.1	-3.27032	0.238924	-3.19386	0.00276256	0.039614	-1.73387	DOWN
MSTRG.2276.1	1.50862	1.37068	3.19336	0.00276636	0.039614	-1.68131	UP
XM_018051778.1	2.22069	6.69158	3.19299	0.00276914	0.039614	-2.05857	UP
MSTRG.6101.4	-1.12899	2.16745	-3.19295	0.00276943	0.039614	-1.8675	DOWN
XR_001296462.2	-2.18503	0.333922	-3.19292	0.00276965	0.039614	-1.73472	DOWN
XM_018040530.1	1.63607	-0.358296	3.19283	0.00277035	0.039614	-1.65032	UP
XM_005680247.3	-1.55487	0.162094	-3.19272	0.0027712	0.039614	-1.70148	DOWN
XM_005699094.3	-2.94043	3.23107	-3.19259	0.0027722	0.039614	-2.08671	DOWN
XM_018038231.1	1.48315	1.26912	3.19114	0.00278322	0.0397399	-1.77448	UP
XM_005684792.3	-2.05694	0.153899	-3.19087	0.00278532	0.0397399	-1.71855	DOWN
XM_005693869.3	3.18409	1.31634	3.19083	0.00278558	0.0397399	-1.68374	UP
XM_018038929.1	2.79907	1.62056	3.19018	0.00279061	0.0397899	-1.74995	UP
XR_001297217.2	-0.755433	2.46066	-3.18978	0.00279364	0.0398112	-1.9057	NOT
MSTRG.3786.2	-1.14392	1.58085	-3.18929	0.00279737	0.0398427	-1.80749	DOWN
XM_018043874.1	1.20227	2.86007	3.18684	0.00281627	0.0400862	-1.88922	UP
MSTRG.7710.5	-2.32838	0.243177	-3.18667	0.00281754	0.0400862	-1.73608	DOWN
MSTRG.16503.4	-1.59394	-0.451317	-3.1861	0.00282193	0.0401268	-1.69188	DOWN
MSTRG.12220.1	-3.56123	1.03605	-3.18548	0.00282673	0.0401594	-1.79851	DOWN
XM_005676006.3	1.4861	0.342147	3.18541	0.0028273	0.0401594	-1.66556	UP
MSTRG.12824.1	2.78004	1.04224	3.18492	0.0028311	0.0401789	-1.70461	UP
XM_005677220.3	0.760112	5.53794	3.18484	0.00283175	0.0401789	-2.107	NOT
MSTRG.13415.1	2.07955	-0.0867547	3.18357	0.00284159	0.0402965	-1.6965	UP
MSTRG.8724.10	-1.49875	2.27177	-3.18311	0.00284513	0.0403248	-1.91593	DOWN
XM_018056965.1	-1.09892	6.48273	-3.18178	0.00285551	0.0404342	-2.13443	DOWN
XM_018049590.1	-1.72052	0.563846	-3.18173	0.00285595	0.0404342	-1.73723	DOWN
XM_018045951.1	1.4394	0.339504	3.18119	0.00286014	0.0404601	-1.67504	UP
XM_005699890.3	1.35537	4.70793	3.1811	0.00286088	0.0404601	-2.06634	UP
MSTRG.4849.9	-1.11199	0.913595	-3.17979	0.00287115	0.0405834	-1.80441	DOWN
MSTRG.5855.1	1.39745	11.1517	3.17766	0.00288794	0.0407886	-2.17861	UP
MSTRG.17718.1	-2.11142	1.53687	-3.17755	0.00288879	0.0407886	-1.82399	DOWN
MSTRG.13207.6	1.88882	1.92076	3.17672	0.00289536	0.0408591	-1.80885	UP
MSTRG.17828.1	1.94963	1.00234	3.17584	0.00290239	0.0409211	-1.7101	UP
XM_018064492.1	1.82159	-0.299667	3.17577	0.00290288	0.0409211	-1.69447	UP
XM_005683186.3	1.34312	2.23945	3.17444	0.00291348	0.0409665	-1.80004	UP
XM_005695932.3	0.676759	6.83039	3.17444	0.00291349	0.0409665	-2.14651	NOT
XM_018046026.1	1.36047	4.54281	3.17444	0.00291351	0.0409665	-2.06523	UP
XM_018055140.1	2.79685	0.285274	3.17441	0.00291371	0.0409665	-1.71186	UP
MSTRG.3992.1	-1.62388	-0.56655	-3.17438	0.00291395	0.0409665	-1.72512	DOWN
MSTRG.4431.1	-1.64447	-0.65276	-3.1739	0.00291779	0.0409984	-1.73353	DOWN
MSTRG.11504.6	2.42135	1.55498	3.17273	0.00292718	0.0411069	-1.78754	UP
XM_018043044.1	1.03864	2.77607	3.17254	0.00292869	0.0411069	-1.93716	UP
XM_018059430.1	2.21618	0.265512	3.17214	0.00293189	0.0411069	-1.71764	UP
XM_018044717.1	1.72868	0.0981771	3.17213	0.00293199	0.0411069	-1.70144	UP
XM_018041936.1	2.09367	1.02338	3.17168	0.00293555	0.0411069	-1.70925	UP
XM_018048029.1	-2.64804	-0.35655	-3.17161	0.00293609	0.0411069	-1.79054	DOWN
XM_005697786.3	-0.89082	4.28936	-3.17156	0.00293655	0.0411069	-2.1192	NOT
MSTRG.12988.3	-1.52551	1.33899	-3.17111	0.00294019	0.0411348	-1.87097	DOWN
XR_001917967.1	1.39177	-0.166967	3.17092	0.00294169	0.0411348	-1.69893	UP
XM_018059235.1	1.88251	-0.142868	3.17014	0.00294794	0.0412001	-1.70907	UP
XM_018060288.1	2.65296	0.541378	3.16903	0.0029569	0.0412762	-1.72319	UP
XM_018057236.1	-1.67634	0.48767	-3.16896	0.00295751	0.0412762	-1.76414	DOWN
XM_018058021.1	0.593807	3.59243	3.16876	0.00295906	0.0412762	-2.03948	NOT
MSTRG.17470.1	-1.45366	1.20265	-3.16868	0.00295971	0.0412762	-1.82356	DOWN
MSTRG.5995.5	-1.82838	0.131329	-3.16821	0.00296352	0.0413072	-1.75669	DOWN
MSTRG.1687.1	-0.776634	2.76135	-3.16674	0.00297551	0.0414223	-2.02779	NOT
MSTRG.2393.4	2.17625	1.18926	3.16645	0.00297786	0.0414223	-1.78053	UP
XM_018047653.1	1.39177	-0.0967795	3.16633	0.00297881	0.0414223	-1.70983	UP
MSTRG.5838.1	-1.36054	1.08242	-3.16631	0.00297895	0.0414223	-1.85559	DOWN
XM_018051181.1	3.07773	1.3105	3.16621	0.00297981	0.0414223	-1.73471	UP
XM_018044343.1	3.01479	1.52932	3.16602	0.0029813	0.0414223	-1.75958	UP
MSTRG.12945.1	-0.847018	1.02609	-3.1653	0.00298724	0.0414609	-1.83831	NOT
MSTRG.15484.1	-2.22345	1.21805	-3.16497	0.00298993	0.0414609	-1.81512	DOWN
XM_018043268.1	2.09795	1.74322	3.16495	0.00299005	0.0414609	-1.74426	UP
MSTRG.8566.2	-1.59244	2.13387	-3.1647	0.00299212	0.0414609	-2.03499	DOWN
MSTRG.1901.4	-1.09906	1.11408	-3.16446	0.00299408	0.0414609	-1.85542	DOWN
XM_005688614.3	-0.916979	1.005	-3.16433	0.00299512	0.0414609	-1.8326	NOT
MSTRG.1087.2	-1.39032	0.675424	-3.16432	0.0029952	0.0414609	-1.81333	DOWN
MSTRG.17954.1	-1.85139	1.2902	-3.16285	0.00300725	0.0416056	-1.84749	DOWN
XM_018050998.1	-0.873218	5.28901	-3.16149	0.00301846	0.0417385	-2.17492	NOT
XM_018043619.1	-1.73273	2.97095	-3.16076	0.00302447	0.0417996	-2.08994	DOWN
MSTRG.3051.2	-1.41455	1.25999	-3.15909	0.0030383	0.0419685	-1.87618	DOWN
XM_018063971.1	2.16855	1.79997	3.15874	0.0030412	0.0419862	-1.7573	UP
MSTRG.15276.6	-1.5529	1.5586	-3.1583	0.00304481	0.0420138	-1.90357	DOWN
MSTRG.11221.10	2.08897	1.48981	3.1581	0.00304651	0.0420151	-1.76668	UP
MSTRG.10316.1	1.88133	2.62539	3.15663	0.00305879	0.042149	-1.83789	UP
MSTRG.12747.1	1.69621	2.12086	3.15655	0.00305945	0.042149	-1.85275	UP
XR_310863.3	-1.54234	-0.595655	-3.15628	0.00306166	0.0421571	-1.76926	DOWN
XM_018052373.1	1.58128	1.70492	3.15472	0.00307472	0.0423147	-1.81681	UP
XM_005685030.3	2.17444	1.59581	3.15374	0.00308294	0.0424055	-1.82981	UP
MSTRG.16318.1	1.82609	4.71116	3.15341	0.00308578	0.0424115	-2.10032	UP
XM_005681096.2	1.95422	2.73732	3.1533	0.00308663	0.0424115	-1.85111	UP
XM_018047876.1	2.85303	1.03781	3.15296	0.00308957	0.0424295	-1.77609	UP
NM_001314285.1	-2.48216	6.47142	-3.15257	0.00309283	0.0424519	-2.22305	DOWN
MSTRG.17749.1	-1.95584	0.733134	-3.15181	0.00309924	0.0425176	-1.83681	DOWN
XM_005694131.2	2.2651	1.28194	3.15147	0.00310214	0.042535	-1.77597	UP
XM_005698601.3	1.73621	0.771159	3.15125	0.00310392	0.0425371	-1.76087	UP
MSTRG.894.10	-1.01545	1.01905	-3.15073	0.00310835	0.0425754	-1.87532	DOWN
NM_001285609.1	1.2823	11.1805	3.15013	0.00311346	0.0425964	-2.24632	UP
XM_005699367.3	-2.05248	1.01919	-3.15001	0.00311445	0.0425964	-1.90036	DOWN
MSTRG.14524.1	-2.42134	2.1863	-3.14988	0.00311559	0.0425964	-1.96329	DOWN
MSTRG.14194.3	-2.21781	0.0171711	-3.14959	0.00311802	0.0425964	-1.82625	DOWN
XM_005679098.3	2.39119	3.67769	3.14948	0.00311899	0.0425964	-1.91774	UP
XM_018059257.1	0.454083	5.42512	3.1494	0.00311967	0.0425964	-2.19339	NOT
MSTRG.16940.2	1.16774	4.62845	3.14917	0.00312163	0.0426007	-2.14195	UP
MSTRG.4707.1	-1.30384	1.55128	-3.14866	0.00312593	0.042625	-1.93253	DOWN
XM_005680814.3	-0.648451	3.23046	-3.14855	0.0031269	0.042625	-2.0607	NOT
XM_018044037.1	1.50135	0.53821	3.14838	0.00312831	0.042625	-1.76324	UP
MSTRG.4397.3	2.02587	0.393191	3.14813	0.00313045	0.042632	-1.78376	UP
XM_018061973.1	-0.728375	4.49279	-3.1478	0.00313328	0.0426483	-2.18198	NOT
MSTRG.13360.11	1.84612	0.958568	3.14721	0.00313837	0.042652	-1.79737	UP
MSTRG.5494.1	-1.74122	-0.540987	-3.1472	0.00313842	0.042652	-1.80242	DOWN
MSTRG.3867.2	-2.22386	-0.0565527	-3.14718	0.00313857	0.042652	-1.82546	DOWN
NM_001285566.1	-3.17787	0.504881	-3.14664	0.0031432	0.042652	-1.84689	DOWN
XM_018057933.1	2.07957	1.84168	3.14652	0.00314425	0.042652	-1.78203	UP
XM_005677071.3	2.02426	0.152003	3.14648	0.00314458	0.042652	-1.77664	UP
XM_018040067.1	-0.604347	5.50198	-3.14612	0.00314767	0.042652	-2.21306	NOT
XM_018047943.1	1.48082	1.19695	3.14577	0.00315063	0.042652	-1.87876	UP
XM_018054081.1	1.59012	0.092529	3.14577	0.00315069	0.042652	-1.76155	UP
MSTRG.194.1	2.37361	-0.120618	3.14556	0.00315251	0.042652	-1.77581	UP
XM_018061298.1	-0.639416	1.68634	-3.14554	0.00315264	0.042652	-1.93726	NOT
XM_013974716.2	1.34615	0.402298	3.14534	0.00315436	0.042652	-1.76739	UP
XM_018049341.1	-0.880829	0.736028	-3.14512	0.00315623	0.042652	-1.84621	NOT
XM_018059064.1	-1.39695	3.56423	-3.14506	0.0031568	0.042652	-2.13109	DOWN
MSTRG.17488.1	-1.54639	1.1588	-3.1447	0.00315989	0.042652	-1.87739	DOWN
XM_018062789.1	2.51041	3.74781	3.14465	0.00316033	0.042652	-1.95596	UP
MSTRG.13355.3	1.7686	2.07397	3.14453	0.00316134	0.042652	-1.88397	UP
MSTRG.17909.2	2.44002	0.267474	3.14429	0.00316336	0.0426571	-1.77976	UP
XM_013974068.2	-2.95491	0.671791	-3.14375	0.00316809	0.0426591	-1.85638	DOWN
XM_018039484.1	2.16714	1.78122	3.14372	0.00316833	0.0426591	-1.83561	UP
MSTRG.9708.2	-2.49538	0.253694	-3.14371	0.00316841	0.0426591	-1.84107	DOWN
XM_018051244.1	2.29445	0.0348236	3.14268	0.00317732	0.042752	-1.78161	UP
MSTRG.8250.1	0.904179	1.90376	3.14241	0.00317964	0.042752	-1.87105	NOT
XM_005678646.3	-1.94191	3.86684	-3.14233	0.00318033	0.042752	-2.13543	DOWN
MSTRG.13299.1	1.59056	1.24364	3.14213	0.00318208	0.042752	-1.81629	UP
MSTRG.10235.2	1.33473	2.93347	3.14196	0.00318351	0.042752	-1.99138	UP
XM_018041905.1	-1.97895	0.190739	-3.14138	0.00318854	0.0427959	-1.83053	DOWN
MSTRG.9746.2	2.37941	1.18448	3.1412	0.00319011	0.0427959	-1.80205	UP
XM_018048809.1	-2.40567	-0.715893	-3.14102	0.00319169	0.0427959	-1.83538	DOWN
MSTRG.1056.1	-1.69637	-0.627654	-3.14081	0.00319354	0.0427987	-1.81577	DOWN
XM_005695780.3	2.29202	1.23978	3.13984	0.00320197	0.0428527	-1.79585	UP
XM_018038233.1	0.499415	4.58725	3.13979	0.00320235	0.0428527	-2.19071	NOT
MSTRG.9684.2	-1.6476	0.615642	-3.13963	0.00320382	0.0428527	-1.86078	DOWN
XM_005678402.3	1.07908	0.817571	3.13959	0.00320414	0.0428527	-1.79581	UP
MSTRG.370.1	-1.75539	-0.569988	-3.1389	0.00321019	0.0429048	-1.82443	DOWN
XM_018045710.1	-2.15758	-0.46708	-3.13866	0.00321227	0.0429048	-1.8318	DOWN
XM_018048642.1	1.55799	3.93932	3.13819	0.00321632	0.0429048	-2.08009	UP
XM_013974077.2	-3.07962	0.760427	-3.13809	0.00321725	0.0429048	-1.87293	DOWN
XR_001918852.1	1.09219	0.938297	3.13804	0.00321766	0.0429048	-1.82959	UP
XM_018051369.1	-0.800088	4.57626	-3.13801	0.0032179	0.0429048	-2.21024	NOT
XM_013971563.2	1.07942	2.22265	3.13701	0.00322669	0.0429781	-1.92354	UP
MSTRG.17342.1	-0.792727	2.34452	-3.13701	0.0032267	0.0429781	-2.02315	NOT
XM_018062606.1	0.985493	4.62378	3.13667	0.00322966	0.0429957	-2.17359	NOT
XM_005682415.2	-0.697319	3.75305	-3.13442	0.00324955	0.0432384	-2.16561	NOT
MSTRG.8091.2	-2.28192	0.899241	-3.13381	0.00325491	0.0432559	-1.92999	DOWN
XM_018055758.1	1.08967	0.995385	3.13369	0.00325598	0.0432559	-1.89014	UP
XM_018066658.1	1.48458	0.284501	3.13366	0.00325627	0.0432559	-1.78838	UP
MSTRG.16324.19	2.09633	-0.0551337	3.13352	0.00325749	0.0432559	-1.80025	UP
MSTRG.4848.5	-0.907558	1.97739	-3.13298	0.00326225	0.0432821	-2.03081	NOT
XM_018044870.1	-0.876332	4.37457	-3.13292	0.00326279	0.0432821	-2.19692	NOT
XM_018057681.1	0.96271	3.56601	3.13228	0.00326845	0.0432916	-2.09061	NOT
XM_018062297.1	2.3339	2.0802	3.13214	0.00326973	0.0432916	-1.8355	UP
XM_018040445.1	-1.13344	0.595234	-3.13213	0.00326984	0.0432916	-1.90984	DOWN
XM_018053165.1	2.14114	-0.0906476	3.1319	0.00327183	0.0432916	-1.80486	UP
XM_018065760.1	-0.62401	3.11804	-3.13182	0.00327258	0.0432916	-2.10814	NOT
XM_018067074.1	1.76515	3.05827	3.13172	0.00327346	0.0432916	-2.02051	UP
XM_018066959.1	-1.74589	2.97207	-3.1315	0.00327538	0.0432919	-2.0842	DOWN
XM_013973920.2	2.4637	2.43765	3.13118	0.00327823	0.0432919	-1.95343	UP
XM_018053846.1	1.10717	2.38882	3.13116	0.00327846	0.0432919	-1.99384	UP
XM_013970002.2	1.94444	0.78321	3.13073	0.00328232	0.0432962	-1.81309	UP
XM_018059145.1	-1.09276	1.32065	-3.13062	0.00328329	0.0432962	-1.96177	DOWN
XM_005699947.3	1.50456	3.66836	3.13056	0.00328376	0.0432962	-2.06758	UP
XM_005700707.3	-0.503302	4.02343	-3.12975	0.003291	0.0433698	-2.21041	NOT
MSTRG.12427.3	2.03505	-0.104849	3.12905	0.0032973	0.0434308	-1.80972	UP
XM_018038329.1	-0.487167	4.49602	-3.1287	0.00330048	0.0434441	-2.22512	NOT
XM_018052104.1	1.7871	1.13823	3.12857	0.00330164	0.0434441	-1.84026	UP
XR_001918995.1	-1.62388	-0.328569	-3.12827	0.00330427	0.0434568	-1.83591	DOWN
XM_018043022.1	1.62852	0.84534	3.12805	0.0033063	0.0434616	-1.84032	UP
XM_005699870.3	1.34721	0.670435	3.1278	0.00330852	0.0434688	-1.80898	UP
MSTRG.7077.1	-1.72559	2.18267	-3.12664	0.00331896	0.0435402	-2.05969	DOWN
XM_005675491.2	1.87234	2.00184	3.12661	0.0033192	0.0435402	-1.85021	UP
XM_018053056.1	2.04168	1.75415	3.12643	0.00332089	0.0435402	-1.83589	UP
XM_018042961.1	1.59711	1.26982	3.12626	0.00332241	0.0435402	-1.8862	UP
XM_018056077.1	3.00505	2.82349	3.12612	0.00332363	0.0435402	-1.94116	UP
XM_018060181.1	-1.70756	2.60745	-3.12606	0.00332419	0.0435402	-2.08482	DOWN
MSTRG.8431.3	-1.23394	1.4906	-3.1255	0.00332929	0.0435402	-1.98311	DOWN
XR_001917795.1	-0.654447	5.28008	-3.12527	0.00333129	0.0435402	-2.25968	NOT
MSTRG.4013.3	-1.97755	0.48182	-3.12514	0.0033325	0.0435402	-1.88677	DOWN
XM_005687991.3	1.84067	0.995511	3.12494	0.00333434	0.0435402	-1.82524	UP
MSTRG.15806.1	2.29608	1.5776	3.12492	0.00333447	0.0435402	-1.92633	UP
MSTRG.917.4	-2.50333	-0.591795	-3.12469	0.00333659	0.0435402	-1.86662	DOWN
XM_013967668.2	-1.0489	0.784982	-3.12462	0.0033372	0.0435402	-1.86014	DOWN
[truncated: 24,094 more rows]

## Sheet: ELvsLL
ID	logFC	AveExpr	t	P.Value	adj.P.Val	B	change
XM_005680261.3	-1.6703	0.342429	-5.82857	8.69e-07	8.69427e-07	4.34861	DOWN
MSTRG.752.4	2.11833	1.31946	5.2361	5.8e-06	5.79723e-06	3.46659	UP
XM_005689815.3	-2.76082	-0.230848	-5.1037	8.83e-06	8.83462e-06	2.80359	DOWN
MSTRG.9805.13	1.52449	0.58083	5.03256	1.11e-05	1.1072e-05	2.72619	UP
MSTRG.504.5	1.72378	0.235127	4.99231	1.26e-05	1.2578e-05	2.61629	UP
MSTRG.9805.15	1.66096	0.452997	4.97035	1.35e-05	1.34831e-05	2.5736	UP
XM_018051682.1	2.06958	0.482962	4.96096	1.39e-05	1.38898e-05	2.81122	UP
MSTRG.6106.2	0.823621	1.73591	4.82816	2.11e-05	2.11193e-05	2.50538	NOT
MSTRG.11393.8	1.26133	1.05756	4.81224	2.22e-05	2.22046e-05	2.31122	UP
XM_018067124.1	1.51356	1.30809	4.80801	2.25e-05	2.25021e-05	2.34566	UP
MSTRG.160.1	0.91023	1.54271	4.79239	2.36e-05	2.36346e-05	2.34961	NOT
XM_018044486.1	2.32461	0.333703	4.78388	2.43e-05	2.42752e-05	2.22582	UP
MSTRG.9805.14	1.52327	0.575745	4.72407	2.93e-05	2.92877e-05	1.9775	UP
MSTRG.9492.17	2.05287	0.0400363	4.72313	2.94e-05	2.93742e-05	1.88201	UP
XM_018051140.1	2.41271	0.609604	4.70931	3.07e-05	3.06741e-05	2.00179	UP
XM_005696526.3	-0.90788	8.50597	-4.6908	3.25e-05	3.25048e-05	2.31394	NOT
MSTRG.3762.4	0.868882	4.85844	4.63581	3.86e-05	3.86012e-05	2.15518	NOT
XM_018063792.1	-1.72498	1.18735	-4.60809	4.21e-05	4.20883e-05	1.63569	DOWN
XM_018039820.1	1.49866	0.748905	4.56657	4.79e-05	4.78981e-05	1.63152	UP
MSTRG.13178.1	0.835521	2.60233	4.5605	4.88e-05	4.88103e-05	1.88119	NOT
XM_013966567.2	-0.907569	2.96931	-4.54608	5.1e-05	5.10489e-05	1.84586	NOT
XM_018056780.1	-1.3278	0.456061	-4.53713	5.25e-05	5.24882e-05	1.33387	DOWN
MSTRG.1574.7	1.25031	2.10336	4.51653	5.6e-05	5.59563e-05	1.71446	UP
MSTRG.213.2	0.803025	0.872014	4.51376	5.64e-05	5.64383e-05	1.48684	NOT
XM_005700408.3	1.94731	-0.0524901	4.49037	6.07e-05	6.06841e-05	1.38731	UP
XM_018040091.1	-1.88312	-0.46361	-4.47176	6.43e-05	6.4286e-05	1.23544	DOWN
XM_018065947.1	0.799714	3.52908	4.45906	6.69e-05	6.68624e-05	1.64479	NOT
MSTRG.194.3	2.15921	0.285124	4.44032	7.09e-05	7.08505e-05	1.24611	UP
XM_018048667.1	1.48013	0.0366225	4.42178	7.5e-05	7.50263e-05	1.1642	UP
MSTRG.6445.1	0.756264	3.64441	4.42162	7.51e-05	7.50642e-05	1.54855	NOT
XM_018040090.1	-2.24807	-0.406524	-4.378	8.59e-05	8.58685e-05	1.0357	DOWN
MSTRG.4864.2	2.42599	0.502996	4.33637	9.76e-05	9.75966e-05	1.02256	UP
MSTRG.10919.1	1.45748	0.188273	4.33504	9.8e-05	9.79944e-05	0.975126	UP
MSTRG.16464.9	1.94594	0.439418	4.27312	0.000118477	0.000118477	0.822275	UP
TRNAG-CCC_47	1.51331	0.0348829	4.2593	0.000123587	0.000123587	0.778259	UP
XM_005677377.3	1.36768	2.20817	4.21042	0.000143465	0.000143465	0.898442	UP
XM_005698316.3	-0.819006	2.74809	-4.19406	0.000150789	0.000150789	0.901253	NOT
XM_018056687.1	-1.28829	0.319234	-4.19405	0.000150795	0.000150795	0.559252	DOWN
MSTRG.16464.5	2.7761	1.90243	4.19183	0.000151818	0.000151818	0.778295	UP
MSTRG.4102.2	1.29633	0.7439	4.14015	0.000177612	0.000177612	0.52549	UP
MSTRG.2646.1	1.46255	1.8541	4.12315	0.000186994	0.000186994	0.672915	UP
XM_018049792.1	-2.05114	0.699884	-4.1024	0.000199108	0.000199108	0.343213	DOWN
MSTRG.13919.4	-2.24745	0.614362	-4.09753	0.000202059	0.000202059	0.447927	DOWN
XM_018058479.1	1.21453	0.54664	4.08855	0.000207613	0.000207613	0.433102	UP
XM_018050354.1	-1.99657	0.601398	-4.08144	0.000212118	0.000212118	0.320802	DOWN
XM_005687933.3	-0.651714	3.54557	-4.04629	0.000235814	0.000235814	0.519277	NOT
XM_005692406.3	-0.451865	5.04875	-4.03935	0.000240787	0.000240787	0.491294	NOT
MSTRG.14721.17	2.13393	0.350912	3.99131	0.00027814	0.00027814	0.327703	UP
XM_018048990.1	2.05452	0.304323	3.98651	0.000282167	0.000282167	0.218636	UP
MSTRG.6329.4	1.3769	3.43858	3.97423	0.00029273	0.00029273	0.321873	UP
XM_018051283.1	1.85333	1.26457	3.96666	0.000299434	0.000299434	0.284925	UP
XM_005684569.3	1.61636	0.414061	3.96321	0.000302539	0.000302539	0.111771	UP
XM_018043886.1	0.685119	1.22324	3.96306	0.000302671	0.000302671	0.220026	NOT
XM_018052785.1	1.38122	0.408989	3.93534	0.000328786	0.000328786	0.0422217	UP
XM_018057575.1	-1.21708	0.902771	-3.92289	0.000341209	0.000341209	0.00978858	DOWN
MSTRG.9973.1	1.2133	2.52015	3.92101	0.00034313	0.00034313	0.17136	UP
XM_018040236.1	1.16611	0.184928	3.92072	0.000343421	0.000343421	-0.0361338	UP
XM_018051284.1	1.60438	0.359056	3.91335	0.000351037	0.000351037	0.11852	UP
XM_018047610.1	-1.10231	3.98656	-3.90605	0.000358747	0.000358747	0.144535	DOWN
MSTRG.614.2	1.32832	0.509275	3.90421	0.000360719	0.000360719	0.00647082	UP
XM_005693592.3	0.932296	1.93941	3.87497	0.000393438	0.000393438	0.0281096	NOT
MSTRG.7473.1	0.822858	2.8626	3.87314	0.000395585	0.000395585	0.0599816	NOT
MSTRG.194.1	2.07734	-0.120618	3.86519	0.000405009	0.000405009	-0.160415	UP
MSTRG.6401.1	-2.25728	2.48722	-3.86046	0.000410734	0.000410734	-0.0409993	DOWN
XM_005679482.2	-0.396816	4.70826	-3.85937	0.000412052	0.000412052	0.00729324	NOT
MSTRG.2864.1	1.78703	-0.606027	3.81562	0.000468946	0.000468946	-0.294592	UP
MSTRG.2970.6	1.16024	0.255115	3.81431	0.000470753	0.000470753	-0.244987	UP
XM_018051160.1	1.72732	1.87892	3.80686	0.00048121	0.00048121	-0.134751	UP
XM_005693727.3	-0.462927	6.09772	-3.80403	0.000485235	0.000485235	-0.148826	NOT
MSTRG.12210.2	-1.67988	-0.518159	-3.80126	0.000489224	0.000489224	-0.397998	DOWN
MSTRG.657.1	1.25291	1.47038	3.79975	0.000491403	0.000491403	-0.144744	UP
MSTRG.14857.1	1.94233	0.691746	3.7964	0.000496268	0.000496268	-0.173547	UP
XM_018057945.1	1.33044	0.138839	3.78511	0.000513035	0.000513035	-0.325748	UP
MSTRG.6702.17	1.81438	0.467795	3.78081	0.000519561	0.000519561	-0.245708	UP
XM_005696209.3	-0.851572	5.21238	-3.77379	0.000530401	0.000530401	-0.218781	NOT
MSTRG.11700.2	1.19102	2.02882	3.77201	0.000533169	0.000533169	-0.20444	UP
MSTRG.8712.4	0.767741	2.02745	3.7692	0.000537598	0.000537598	-0.226656	NOT
MSTRG.4036.1	0.85039	1.24524	3.76704	0.000541009	0.000541009	-0.280623	NOT
XM_005678712.2	-0.526483	5.2288	-3.76027	0.000551868	0.000551868	-0.259886	NOT
XM_005678534.3	-0.478382	7.43668	-3.75644	0.000558108	0.000558108	-0.283687	NOT
XM_013971002.2	1.10979	0.546018	3.75566	0.000559392	0.000559392	-0.377779	UP
XM_005687536.3	-0.898249	2.91225	-3.7539	0.000562289	0.000562289	-0.252534	NOT
MSTRG.11898.4	1.2761	0.33686	3.74102	0.000583903	0.000583903	-0.485287	UP
XM_018046884.1	0.831492	1.53644	3.73907	0.000587261	0.000587261	-0.332981	NOT
XM_018061829.1	0.607242	5.0676	3.73543	0.000593553	0.000593553	-0.327405	NOT
XM_018051081.1	0.957763	1.99271	3.73263	0.000598424	0.000598424	-0.306696	NOT
XM_018052725.1	1.23854	1.71301	3.71102	0.000637456	0.000637456	-0.383957	UP
XM_018058864.1	1.09668	3.35805	3.70138	0.000655639	0.000655639	-0.397379	UP
XM_018041955.1	0.400677	3.07657	3.6955	0.000666978	0.000666978	-0.399402	NOT
XM_018044448.1	-0.548204	3.13048	-3.69279	0.000672265	0.000672265	-0.405884	NOT
MSTRG.11559.2	1.18116	0.752814	3.69075	0.000676275	0.000676275	-0.517438	UP
MSTRG.7553.1	0.689767	2.71123	3.68762	0.000682475	0.000682475	-0.417959	NOT
XM_018041546.1	-2.34945	1.32216	-3.68673	0.000684249	0.000684249	-0.528538	DOWN
MSTRG.2680.3	1.44964	-0.0467827	3.68339	0.000690939	0.000690939	-0.541296	UP
MSTRG.6169.3	0.85062	1.10517	3.67292	0.000712309	0.000712309	-0.530605	NOT
MSTRG.2877.7	1.49714	0.0852514	3.65709	0.000745833	0.000745833	-0.62694	UP
XM_005698262.3	-1.29908	0.188555	-3.65483	0.000750757	0.000750757	-0.733504	DOWN
MSTRG.7853.1	1.32822	2.66558	3.62614	0.000815849	0.000815849	-0.587257	UP
XM_005686651.2	0.905191	1.03104	3.62456	0.000819593	0.000819593	-0.630489	NOT
MSTRG.10450.1	0.48117	3.18203	3.61716	0.000837316	0.000837316	-0.605999	NOT
XM_018040244.1	0.721962	3.78389	3.61148	0.000851189	0.000851189	-0.632152	NOT
MSTRG.8620.8	1.75247	1.79	3.60526	0.000866623	0.000866623	-0.629337	UP
MSTRG.16822.1	0.68733	1.49174	3.59744	0.00088639	0.00088639	-0.682501	NOT
XM_018039131.1	1.39326	0.590558	3.59648	0.000888861	0.000888861	-0.671591	UP
XR_001918074.1	1.16812	0.35036	3.59444	0.0008941	0.0008941	-0.758524	UP
MSTRG.2689.1	1.52212	3.08528	3.58735	0.000912579	0.000912579	-0.680494	UP
XM_018060834.1	0.734776	1.42923	3.57571	0.000943676	0.000943676	-0.72213	NOT
XM_005681729.3	-1.25906	7.91603	-3.57421	0.000947757	0.000947757	-0.766637	DOWN
XM_018064351.1	1.45689	0.270671	3.57397	0.000948422	0.000948422	-0.825765	UP
XM_005684290.3	-0.599712	6.11639	-3.57067	0.000957466	0.000957466	-0.763846	NOT
XM_018062814.1	0.584718	5.13594	3.56599	0.000970446	0.000970446	-0.771439	NOT
XM_005689384.3	1.18837	0.255115	3.5608	0.000985033	0.000985033	-0.894307	UP
XM_005681629.3	0.721497	4.60139	3.55937	0.000989086	0.000989086	-0.781087	NOT
XM_018043720.1	1.04481	3.62966	3.55711	0.00099552	0.00099552	-0.777082	UP
XM_018042386.1	1.64479	-0.0451769	3.55532	0.00100065	0.00100065	-0.90364	UP
XM_018054975.1	-0.461045	4.47746	-3.54796	0.00102202	0.00102202	-0.801193	NOT
MSTRG.8970.2	1.14943	1.76182	3.54715	0.0010244	0.0010244	-0.790029	UP
MSTRG.2645.1	1.20514	2.30133	3.54098	0.00104269	0.00104269	-0.789067	UP
XM_018054257.1	1.45645	-0.325846	3.53813	0.00105124	0.00105124	-0.915511	UP
MSTRG.16476.1	0.840076	3.82988	3.5376	0.00105286	0.00105286	-0.819362	NOT
XM_013967207.2	-0.991176	1.05072	-3.5353	0.00105981	0.00105981	-0.848339	NOT
MSTRG.2300.1	0.49906	1.89015	3.5334	0.00106559	0.00106559	-0.814534	NOT
MSTRG.16885.1	1.71284	0.786264	3.53066	0.00107398	0.00107398	-0.850347	UP
XM_005684351.3	-0.856209	1.41288	-3.52223	0.00110021	0.00110021	-0.89551	NOT
XM_018041866.1	0.568724	1.68081	3.52138	0.00110289	0.00110289	-0.845023	NOT
XR_001919286.1	1.50267	0.228003	3.52115	0.00110362	0.00110362	-0.933553	UP
MSTRG.16741.1	0.807647	1.00103	3.52061	0.00110532	0.00110532	-0.90863	NOT
XM_005691553.3	1.15314	0.255115	3.50546	0.00115426	0.00115426	-0.939102	UP
MSTRG.784.1	1.09617	2.39322	3.50445	0.00115758	0.00115758	-0.876008	UP
XM_013975391.2	1.52515	0.432945	3.49975	0.0011732	0.0011732	-0.999137	UP
XM_005691708.3	-0.554146	3.4229	-3.49774	0.00117995	0.00117995	-0.903757	NOT
XM_018061690.1	1.23071	0.520179	3.49432	0.00119152	0.00119152	-0.980368	UP
MSTRG.9532.6	1.32206	0.182145	3.49238	0.00119814	0.00119814	-1.00489	UP
MSTRG.12034.2	0.643753	1.15373	3.49068	0.00120394	0.00120394	-0.944196	NOT
XM_018057118.1	-1.7359	-0.0951428	-3.48832	0.00121208	0.00121208	-1.06766	DOWN
XM_018061556.1	1.12811	1.95092	3.48525	0.00122272	0.00122272	-0.922599	UP
XM_018048002.1	-1.38361	0.667057	-3.47687	0.00125225	0.00125225	-1.04085	DOWN
XM_018046200.1	0.64324	0.883992	3.47101	0.00127332	0.00127332	-1.00199	NOT
XM_005688770.3	0.820206	1.96867	3.47069	0.00127447	0.00127447	-0.960044	NOT
MSTRG.16413.1	-1.53889	2.02177	-3.46524	0.00129438	0.00129438	-0.97777	DOWN
XR_001918103.1	1.25242	1.99011	3.46127	0.00130906	0.00130906	-0.985609	UP
MSTRG.8024.1	0.919949	1.72292	3.45743	0.00132341	0.00132341	-1.00148	NOT
MSTRG.4292.4	0.76358	2.89325	3.45368	0.00133758	0.00133758	-1.00887	NOT
XM_005693669.3	-0.536942	4.63683	-3.44807	0.00135902	0.00135902	-1.06291	NOT
XM_005699209.3	1.57731	-0.372106	3.43761	0.00139993	0.00139993	-1.12209	UP
XM_018046885.1	0.440528	4.00221	3.4368	0.00140311	0.00140311	-1.08228	NOT
XM_018041222.1	1.4365	0.431946	3.43634	0.00140496	0.00140496	-1.05469	UP
XM_005692175.3	1.32973	1.35847	3.43576	0.00140727	0.00140727	-1.0564	UP
MSTRG.3331.1	0.420649	3.1417	3.43084	0.00142702	0.00142702	-1.07425	NOT
MSTRG.12347.4	-0.771423	2.52914	-3.42926	0.0014334	0.0014334	-1.06154	NOT
XR_001296981.2	0.619552	2.19155	3.42394	0.00145514	0.00145514	-1.0712	NOT
XM_018046657.1	0.537037	2.23754	3.42238	0.00146158	0.00146158	-1.07561	NOT
MSTRG.4909.2	0.923079	2.02924	3.42106	0.00146703	0.00146703	-1.07837	NOT
XM_005683864.3	-0.747482	3.53027	-3.41972	0.00147262	0.00147262	-1.0904	NOT
XM_018060092.1	-1.38948	1.26141	-3.41764	0.00148128	0.00148128	-1.13551	DOWN
MSTRG.8389.3	1.15969	0.144547	3.41726	0.00148287	0.00148287	-1.17279	UP
XM_005687741.3	1.21479	0.822438	3.41228	0.00150386	0.00150386	-1.15695	UP
XR_310868.3	-0.919589	3.04954	-3.41203	0.00150496	0.00150496	-1.10117	NOT
MSTRG.338.2	1.29079	0.234223	3.4079	0.0015226	0.0015226	-1.2077	UP
MSTRG.5010.1	0.662852	2.51543	3.4064	0.00152907	0.00152907	-1.11646	NOT
XM_018059273.1	1.18128	0.0717161	3.40005	0.00155668	0.00155668	-1.21454	UP
MSTRG.3744.1	-0.917183	2.76552	-3.4	0.00155691	0.00155691	-1.13896	NOT
XM_005685679.3	1.61625	0.208361	3.39242	0.00159053	0.00159053	-1.20612	UP
XM_018047897.1	1.19321	0.416786	3.39164	0.00159403	0.00159403	-1.19352	UP
XM_018065135.1	2.03555	0.653835	3.38611	0.00161904	0.00161904	-1.17141	UP
MSTRG.2796.1	0.892037	1.33514	3.38279	0.0016342	0.0016342	-1.18771	NOT
XR_001296116.2	1.71753	0.70777	3.38223	0.0016368	0.0016368	-1.18765	UP
XM_013967668.2	-0.908612	0.784982	-3.38179	0.00163881	0.00163881	-1.27345	NOT
XM_018046875.1	1.03866	0.557576	3.37765	0.00165804	0.00165804	-1.23783	UP
XM_013964144.2	0.609812	2.44621	3.37666	0.00166264	0.00166264	-1.18767	NOT
MSTRG.4838.1	0.962999	1.75431	3.3688	0.00169977	0.00169977	-1.20392	NOT
NM_001285559.1	-0.497494	8.28992	-3.36593	0.00171354	0.00171354	-1.30317	NOT
MSTRG.889.1	0.759779	0.851824	3.36556	0.00171528	0.00171528	-1.25825	NOT
XM_018046976.1	0.398202	3.03036	3.36483	0.0017188	0.0017188	-1.23032	NOT
MSTRG.2702.4	-1.25888	1.01212	-3.36358	0.00172485	0.00172485	-1.26342	DOWN
MSTRG.9461.6	1.05768	0.695025	3.36296	0.00172787	0.00172787	-1.27469	UP
MSTRG.12555.2	0.724846	3.3052	3.35539	0.00176495	0.00176495	-1.26486	NOT
XM_018040599.1	0.990249	4.21955	3.35133	0.00178516	0.00178516	-1.29629	NOT
XM_018042327.1	0.74674	5.6136	3.34593	0.00181235	0.00181235	-1.33916	NOT
MSTRG.3855.1	1.04848	1.68182	3.33191	0.00188486	0.00188486	-1.29155	UP
XM_018048471.1	1.46261	0.412121	3.32658	0.00191311	0.00191311	-1.34003	UP
XM_005693214.3	-1.85721	3.17875	-3.32536	0.00191965	0.00191965	-1.31761	DOWN
XM_018054390.1	1.48323	0.582015	3.32392	0.0019274	0.0019274	-1.36044	UP
XM_018066612.1	1.63243	1.2149	3.32183	0.00193868	0.00193868	-1.31565	UP
MSTRG.575.3	1.18194	0.89596	3.32174	0.00193916	0.00193916	-1.33956	UP
XM_018060285.1	-1.41029	0.274219	-3.31968	0.00195034	0.00195034	-1.41798	DOWN
MSTRG.4265.1	0.98973	1.39238	3.31876	0.00195538	0.00195538	-1.3394	NOT
MSTRG.16391.1	1.04539	0.237568	3.31668	0.00196675	0.00196675	-1.38579	UP
MSTRG.15278.6	-1.75531	2.96308	-3.31419	0.00198047	0.00198047	-1.33699	DOWN
XM_018060238.1	0.825172	4.38062	3.31331	0.0019853	0.0019853	-1.40285	NOT
XM_013969426.2	-0.742782	2.04443	-3.30904	0.00200906	0.00200906	-1.34541	NOT
XM_018061610.1	1.47183	1.14392	3.30686	0.00202131	0.00202131	-1.35879	UP
XM_005680266.3	-0.355237	5.30544	-3.30659	0.00202283	0.00202283	-1.42752	NOT
MSTRG.135.3	0.884251	3.45862	3.30458	0.00203418	0.00203418	-1.3854	NOT
XM_018039654.1	0.415114	2.99357	3.30375	0.00203889	0.00203889	-1.38085	NOT
XM_005684877.3	-0.596019	6.02876	-3.30277	0.00204446	0.00204446	-1.4453	NOT
XM_018058602.1	1.19295	0.363012	3.3024	0.00204658	0.00204658	-1.38085	UP
XM_018047039.1	0.646924	2.88491	3.30204	0.00204865	0.00204865	-1.37742	NOT
XM_013968612.2	-0.588316	8.86257	-3.30159	0.00205121	0.00205121	-1.4659	NOT
XM_018043756.1	0.883827	0.970323	3.30055	0.00205716	0.00205716	-1.38922	NOT
XM_005699871.3	-0.524912	3.58143	-3.2982	0.00207062	0.00207062	-1.39768	NOT
MSTRG.13293.1	0.585729	3.07432	3.29438	0.00209275	0.00209275	-1.40573	NOT
MSTRG.17198.3	5.15877	1.7418	3.2927	0.0021026	0.0021026	-1.38533	UP
MSTRG.1252.1	1.12939	3.76371	3.29217	0.0021057	0.0021057	-1.45375	UP
XM_018048898.1	-0.605955	1.82652	-3.29132	0.00211068	0.00211068	-1.3921	NOT
XM_005680366.2	-0.682254	7.58349	-3.29123	0.0021112	0.0021112	-1.48499	NOT
XM_005681059.3	-0.853568	4.61637	-3.29074	0.00211406	0.00211406	-1.46263	NOT
XM_005696206.3	-1.02045	1.65595	-3.28904	0.00212406	0.00212406	-1.40518	DOWN
XM_018057447.1	-0.462619	5.98616	-3.287	0.00213615	0.00213615	-1.48301	NOT
XM_018066946.1	-1.47739	0.5122	-3.2849	0.00214866	0.00214866	-1.48432	DOWN
XM_005685985.3	0.744093	0.60102	3.28431	0.00215216	0.00215216	-1.44864	NOT
MSTRG.2363.2	1.72833	-0.428328	3.28399	0.00215406	0.00215406	-1.46887	UP
XM_005692050.3	1.09738	0.634124	3.28231	0.00216416	0.00216416	-1.44795	UP
MSTRG.9008.5	-1.15559	0.141483	-3.28214	0.0021652	0.0021652	-1.53383	DOWN
MSTRG.8230.18	1.34791	-0.157069	3.28172	0.00216773	0.00216773	-1.47297	UP
XM_005681064.3	-0.484938	4.83198	-3.27967	0.00218009	0.00218009	-1.48618	NOT
XM_018061149.1	1.06075	1.57768	3.27343	0.00221812	0.00221812	-1.42857	UP
XM_005695886.3	-0.480079	4.05698	-3.27284	0.0022218	0.0022218	-1.48148	NOT
MSTRG.15806.1	1.56182	1.5776	3.26864	0.00224783	0.00224783	-1.441	UP
XM_013969509.2	1.25647	0.161812	3.26678	0.00225942	0.00225942	-1.51056	UP
XM_018047703.1	1.66339	2.18116	3.26549	0.00226751	0.00226751	-1.45267	UP
MSTRG.13095.1	-1.63427	0.26221	-3.26548	0.00226758	0.00226758	-1.53628	DOWN
XM_005686076.3	-0.626727	6.328	-3.26428	0.00227516	0.00227516	-1.54185	NOT
XM_005678436.3	0.707009	3.14739	3.2625	0.00228637	0.00228637	-1.49293	NOT
XM_018040689.1	1.15461	2.64245	3.26194	0.00228992	0.00228992	-1.47622	UP
XM_013967413.2	-0.874277	1.88542	-3.25956	0.00230506	0.00230506	-1.46461	NOT
XM_018043763.1	1.1974	1.81239	3.25762	0.00231744	0.00231744	-1.46921	UP
XM_018039818.1	-1.88031	0.569813	-3.24565	0.00239546	0.00239546	-1.57824	DOWN
XM_018043792.1	1.45158	0.298208	3.24512	0.00239897	0.00239897	-1.5383	UP
XM_005692416.3	-0.715036	3.61464	-3.24329	0.00241112	0.00241112	-1.53241	NOT
MSTRG.2787.4	-1.29557	-0.177541	-3.24329	0.00241114	0.00241114	-1.56829	DOWN
XM_005678644.3	-0.488764	5.7704	-3.24221	0.00241835	0.00241835	-1.59364	NOT
MSTRG.9492.15	1.36925	-0.0150345	3.24009	0.00243255	0.00243255	-1.5807	UP
XM_018043224.1	1.10084	0.333515	3.23862	0.00244243	0.00244243	-1.5649	UP
MSTRG.11423.1	0.996253	1.34393	3.23634	0.00245784	0.00245784	-1.51659	NOT
MSTRG.14598.1	1.05722	1.74941	3.23158	0.0024903	0.0024903	-1.52555	UP
XM_005690119.3	0.602873	2.38698	3.23025	0.00249951	0.00249951	-1.53895	NOT
XM_005674664.3	1.45516	-0.319486	3.2295	0.00250468	0.00250468	-1.60823	UP
XM_018038688.1	-1.61913	-0.48336	-3.2247	0.00253799	0.00253799	-1.6327	DOWN
XM_005680737.3	0.78514	3.4271	3.22079	0.00256551	0.00256551	-1.60214	NOT
XM_005693886.3	-0.517177	4.69616	-3.21985	0.00257216	0.00257216	-1.62566	NOT
MSTRG.10074.1	0.63187	2.81566	3.21973	0.002573	0.002573	-1.57791	NOT
MSTRG.16464.1	1.89906	0.562526	3.21971	0.0025731	0.0025731	-1.60488	UP
MSTRG.13415.1	1.45443	-0.0867547	3.21867	0.00258052	0.00258052	-1.58374	UP
MSTRG.8369.8	-0.855226	0.560358	-3.21629	0.00259744	0.00259744	-1.6183	NOT
XM_018048119.1	2.34337	4.23586	3.21298	0.00262125	0.00262125	-1.62267	UP
MSTRG.5775.9	-1.31353	0.459357	-3.21206	0.00262785	0.00262785	-1.64927	DOWN
MSTRG.17606.1	1.12911	0.633338	3.20982	0.0026441	0.0026441	-1.59353	UP
XM_018055606.1	1.02414	1.21069	3.20702	0.0026645	0.0026645	-1.58221	UP
XM_013976313.2	0.52441	4.51994	3.20423	0.00268504	0.00268504	-1.67261	NOT
XM_005674768.2	-1.63019	0.473714	-3.20069	0.00271123	0.00271123	-1.68181	DOWN
MSTRG.333.1	-1.03836	2.82981	-3.19626	0.00274444	0.00274444	-1.6149	DOWN
MSTRG.13460.12	1.57825	1.23344	3.19621	0.0027448	0.0027448	-1.61469	UP
MSTRG.16411.2	1.3249	0.931706	3.19592	0.00274697	0.00274697	-1.61531	UP
XM_018062454.1	0.503568	5.37886	3.19528	0.00275179	0.00275179	-1.70808	NOT
XM_018048365.1	-0.557838	2.89396	-3.19489	0.00275474	0.00275474	-1.62992	NOT
XM_005690519.3	0.5917	3.4425	3.19211	0.00277584	0.00277584	-1.67614	NOT
MSTRG.12612.1	0.739177	1.71242	3.18914	0.00279858	0.00279858	-1.62306	NOT
XM_018039103.1	0.684539	3.12851	3.18583	0.00282403	0.00282403	-1.6749	NOT
MSTRG.10741.3	-1.6038	-0.478163	-3.18382	0.00283962	0.00283962	-1.72868	DOWN
MSTRG.4572.9	1.24541	0.744156	3.18203	0.00285358	0.00285358	-1.64137	UP
XM_018043085.1	0.988951	2.49395	3.18187	0.00285481	0.00285481	-1.66218	NOT
XM_018043481.1	-0.779419	4.1274	-3.17962	0.00287246	0.00287246	-1.69604	NOT
XM_018064549.1	0.978144	1.40095	3.17923	0.00287556	0.00287556	-1.64758	NOT
MSTRG.16560.4	1.36531	2.03707	3.17879	0.00287906	0.00287906	-1.6469	UP
XM_005678337.3	1.40932	-0.0569527	3.17537	0.00290606	0.00290606	-1.68181	UP
XM_018065866.1	-0.595931	0.942202	-3.17451	0.00291296	0.00291296	-1.67282	NOT
XM_018039166.1	0.789293	1.41143	3.17161	0.0029361	0.0029361	-1.66354	NOT
XM_005696270.3	-0.566666	4.94167	-3.17096	0.00294133	0.00294133	-1.75631	NOT
XM_018040666.1	0.485292	3.62765	3.17019	0.00294755	0.00294755	-1.73086	NOT
XM_018040556.1	0.654622	1.86914	3.16355	0.00300155	0.00300155	-1.68174	NOT
XM_005677115.3	0.653821	4.17934	3.16248	0.00301031	0.00301031	-1.75805	NOT
XM_005677657.3	-0.83081	5.60512	-3.15914	0.00303787	0.00303787	-1.78634	NOT
XM_005694080.3	-0.447785	5.12743	-3.1571	0.00305484	0.00305484	-1.79007	NOT
MSTRG.16016.6	1.05092	2.50744	3.15503	0.00307217	0.00307217	-1.72216	UP
MSTRG.5880.4	0.654976	2.60462	3.15422	0.00307896	0.00307896	-1.72959	NOT
XM_018053713.1	0.60288	1.77893	3.15377	0.00308275	0.00308275	-1.70353	NOT
MSTRG.3614.1	1.35828	2.29586	3.14344	0.00317071	0.00317071	-1.7321	UP
XM_005692373.3	-0.321009	5.46165	-3.14111	0.00319087	0.00319087	-1.83906	NOT
MSTRG.3614.11	1.48203	1.14081	3.13917	0.00320782	0.00320782	-1.7384	UP
MSTRG.15686.9	-1.5206	0.724319	-3.13886	0.00321054	0.00321054	-1.79342	DOWN
MSTRG.15840.6	-1.1084	0.0524297	-3.1372	0.00322508	0.00322508	-1.83671	DOWN
NM_001285745.1	-2.99747	2.27345	-3.13686	0.00322805	0.00322805	-1.7584	DOWN
XR_001917253.1	1.26339	0.620938	3.13436	0.00325008	0.00325008	-1.76516	UP
XM_005680282.3	-0.998776	2.90011	-3.13353	0.00325736	0.00325736	-1.77117	NOT
XM_005685406.3	-1.84627	0.725908	-3.13294	0.00326258	0.00326258	-1.81407	DOWN
XM_005685161.3	1.26328	2.89479	3.12868	0.00330061	0.00330061	-1.8031	UP
XM_018052391.1	1.1438	2.05409	3.12858	0.00330156	0.00330156	-1.76535	UP
XM_005680373.3	0.992823	4.98087	3.12627	0.00332233	0.00332233	-1.86191	NOT
MSTRG.6899.1	-0.824988	2.83218	-3.12271	0.00335453	0.00335453	-1.78197	NOT
MSTRG.12824.3	1.26595	0.240636	3.12103	0.00336994	0.00336994	-1.79862	UP
XM_005691037.3	1.74933	0.830303	3.12033	0.0033763	0.0033763	-1.77889	UP
XM_018052528.1	-1.53611	0.435731	-3.11822	0.0033957	0.0033957	-1.83992	DOWN
MSTRG.3149.2	1.28626	2.1043	3.1175	0.00340238	0.00340238	-1.81643	UP
XM_005676300.3	0.996647	-0.00111466	3.11327	0.00344156	0.00344156	-1.83466	NOT
MSTRG.7148.5	0.834974	1.04938	3.11215	0.00345201	0.00345201	-1.79744	NOT
MSTRG.8640.6	0.963416	1.4902	3.11075	0.00346522	0.00346522	-1.80139	NOT
XM_018038578.1	1.14675	0.560591	3.10979	0.00347423	0.00347423	-1.83399	UP
XM_018047657.1	1.41061	3.00269	3.10977	0.00347441	0.00347441	-1.86819	UP
MSTRG.10564.1	1.1711	1.48059	3.10772	0.00349376	0.00349376	-1.84693	UP
XM_018056193.1	1.50646	0.266209	3.10731	0.00349763	0.00349763	-1.82868	UP
MSTRG.11915.4	-1.3204	0.246854	-3.10554	0.00351444	0.00351444	-1.86183	DOWN
MSTRG.17301.2	1.42597	0.988764	3.10323	0.0035365	0.0035365	-1.81732	UP
MSTRG.16959.1	-3.38245	1.44279	-3.09874	0.00357968	0.00357968	-1.86141	DOWN
XM_013969875.2	0.336463	3.75183	3.09822	0.00358475	0.00358475	-1.90397	NOT
MSTRG.11997.4	0.885433	1.27264	3.09769	0.0035899	0.0035899	-1.83269	NOT
XM_018060746.1	-0.750021	2.78436	-3.09754	0.00359134	0.00359134	-1.84014	NOT
MSTRG.3496.2	1.0216	2.58711	3.09719	0.00359472	0.00359472	-1.863	UP
XM_005684682.3	0.917745	1.09116	3.097	0.0035966	0.0035966	-1.83599	NOT
MSTRG.7814.1	1.05473	2.13447	3.0967	0.00359954	0.00359954	-1.84646	UP
MSTRG.7651.1	1.87391	1.75033	3.09606	0.00360574	0.00360574	-1.8359	UP
MSTRG.5999.1	1.31703	0.659888	3.09514	0.0036147	0.0036147	-1.85541	UP
XM_018042610.1	-0.461831	3.77285	-3.09446	0.00362136	0.00362136	-1.90275	NOT
XM_005692271.3	-0.340872	5.38068	-3.09439	0.00362203	0.00362203	-1.94962	NOT
XM_005678311.3	0.568268	3.60986	3.09232	0.00364235	0.00364235	-1.9204	NOT
XM_018055758.1	0.76196	0.995385	3.09212	0.00364437	0.00364437	-1.84203	NOT
MSTRG.14642.1	0.703037	1.4536	3.09202	0.00364534	0.00364534	-1.84241	NOT
MSTRG.8007.1	0.551236	2.22571	3.08948	0.00367041	0.00367041	-1.86177	NOT
XR_001918225.1	1.24186	0.257538	3.0892	0.00367323	0.00367323	-1.88027	UP
XR_001918595.1	0.713414	1.04336	3.08627	0.00370244	0.00370244	-1.85954	NOT
MSTRG.11568.4	0.90834	0.540449	3.08617	0.00370337	0.00370337	-1.87344	NOT
XM_018060847.1	0.430006	3.72859	3.08596	0.00370549	0.00370549	-1.92236	NOT
XM_018054883.1	0.668328	3.36488	3.08366	0.00372857	0.00372857	-1.92905	NOT
XM_018058371.1	-1.29691	0.745626	-3.08212	0.0037441	0.0037441	-1.86519	DOWN
MSTRG.2308.6	-0.930156	3.87141	-3.08173	0.00374801	0.00374801	-1.91619	NOT
MSTRG.17187.3	1.60355	1.02548	3.08028	0.0037627	0.0037627	-1.87026	UP
XM_018054282.1	1.17646	-0.0527717	3.08007	0.00376492	0.00376492	-1.88877	UP
XM_018058182.1	-1.38684	0.286569	-3.07963	0.00376934	0.00376934	-1.92154	DOWN
XM_018054924.1	0.792993	1.6883	3.07856	0.00378022	0.00378022	-1.87555	NOT
XM_018055273.1	-1.10423	0.269879	-3.07834	0.00378244	0.00378244	-1.92393	DOWN
XM_018061700.1	0.433969	4.66767	3.073	0.00383733	0.00383733	-1.99343	NOT
XM_018054036.1	1.15392	0.485367	3.07284	0.00383894	0.00383894	-1.89972	UP
XM_018056598.1	0.871736	0.793195	3.07268	0.00384068	0.00384068	-1.90253	NOT
MSTRG.8821.1	0.614311	1.72802	3.07146	0.0038533	0.0038533	-1.89143	NOT
XM_018064167.1	-0.466157	2.91384	-3.06989	0.00386965	0.00386965	-1.9102	NOT
XM_018063744.1	0.999214	2.28893	3.06695	0.00390032	0.00390032	-1.91661	NOT
XM_005690878.3	1.13937	1.52106	3.06189	0.00395387	0.00395387	-1.92155	UP
XM_005691403.3	-0.359809	3.71307	-3.06164	0.00395648	0.00395648	-1.97315	NOT
XM_005686868.3	-0.319133	3.77047	-3.05798	0.00399562	0.00399562	-1.99172	NOT
XM_018039213.1	-0.384967	4.13751	-3.05585	0.00401855	0.00401855	-2.00555	NOT
XM_018038405.1	-0.928694	0.182284	-3.05074	0.00407416	0.00407416	-1.98664	NOT
XM_018051075.1	1.03041	3.62389	3.05014	0.00408071	0.00408071	-2.02404	UP
XM_018048766.1	0.375327	6.9178	3.04813	0.00410271	0.00410271	-2.07552	NOT
MSTRG.10224.1	0.780606	1.09844	3.04779	0.00410645	0.00410645	-1.94151	NOT
MSTRG.9492.10	-0.859235	1.49061	-3.04609	0.00412528	0.00412528	-1.94405	NOT
MSTRG.12622.1	0.6992	1.55074	3.04609	0.00412529	0.00412529	-1.9439	NOT
XM_005689231.3	1.0917	0.747335	3.04331	0.00415616	0.00415616	-1.96246	UP
MSTRG.16171.4	1.28031	0.468107	3.04322	0.00415721	0.00415721	-1.97435	UP
XM_018066406.1	-0.614025	2.73147	-3.0414	0.00417752	0.00417752	-1.98517	NOT
XM_018040205.1	-1.0777	-0.584719	-3.04101	0.00418189	0.00418189	-2.0299	DOWN
MSTRG.12027.14	1.14494	0.0455367	3.03922	0.00420198	0.00420198	-1.99943	UP
XM_018041353.1	1.12828	0.586962	3.03918	0.0042025	0.0042025	-1.97172	UP
XM_018050009.1	1.07034	1.74992	3.03549	0.00424423	0.00424423	-1.96723	UP
XM_005698034.3	0.947509	2.12053	3.03352	0.00426667	0.00426667	-1.98144	NOT
MSTRG.10748.1	0.755544	1.96217	3.03141	0.00429078	0.00429078	-1.98239	NOT
XM_018048561.1	1.3267	0.282229	3.02771	0.00433353	0.00433353	-2.00262	UP
MSTRG.16979.1	0.599622	2.91025	3.02738	0.00433737	0.00433737	-2.02102	NOT
XM_018046456.1	0.99618	0.297724	3.02578	0.00435592	0.00435592	-1.99648	NOT
XM_005676607.3	-0.493725	4.70081	-3.02572	0.00435665	0.00435665	-2.09225	NOT
XM_018056076.1	1.17733	0.385038	3.02542	0.00436011	0.00436011	-2.01407	UP
XM_013962290.2	0.969785	0.409409	3.02401	0.00437668	0.00437668	-2.0085	NOT
XM_005695121.3	1.19422	0.0230744	3.024	0.00437674	0.00437674	-2.04127	UP
XM_005680677.3	-0.739624	2.53591	-3.02148	0.00440633	0.00440633	-2.00391	NOT
XM_005698536.3	-1.06525	2.21399	-3.02039	0.00441915	0.00441915	-2.00846	DOWN
XM_018055616.1	0.926351	2.76139	3.02017	0.00442184	0.00442184	-2.04904	NOT
XM_018062236.1	1.29941	-0.106248	3.02012	0.00442235	0.00442235	-2.01783	UP
XM_013962421.2	-0.67457	2.91582	-3.01865	0.00443975	0.00443975	-2.02173	NOT
XM_018066036.1	1.17305	-0.0725418	3.01837	0.00444316	0.00444316	-2.02528	UP
XM_005700407.3	2.29179	2.06516	3.01815	0.0044457	0.0044457	-2.02228	UP
MSTRG.9492.2	1.40937	1.16844	3.01812	0.00444609	0.00444609	-2.01481	UP
XM_005685255.1	-0.386164	5.01432	-3.01714	0.00445776	0.00445776	-2.12944	NOT
NM_001285574.1	0.400267	3.56329	3.01552	0.00447703	0.00447703	-2.09221	NOT
MSTRG.4560.1	1.30769	4.04134	3.0146	0.00448809	0.00448809	-2.12531	UP
XM_005700907.3	-1.14449	0.325163	-3.01412	0.0044938	0.0044938	-2.0713	DOWN
XM_018049586.1	0.77757	2.22793	3.01269	0.00451097	0.00451097	-2.03583	NOT
XM_018061566.1	0.661725	3.63506	3.01103	0.00453106	0.00453106	-2.10487	NOT
XM_018041146.1	1.22805	1.64239	3.00743	0.00457481	0.00457481	-2.02996	UP
XM_018040148.1	1.58583	-0.134952	3.00522	0.00460176	0.00460176	-2.04319	UP
MSTRG.12289.1	0.484518	3.78186	3.00436	0.00461235	0.00461235	-2.12485	NOT
MSTRG.3884.7	0.878715	0.930351	3.00394	0.0046176	0.0046176	-2.03624	NOT
XM_018050293.1	0.931308	0.953617	3.00279	0.00463166	0.00463166	-2.04929	NOT
XM_018054764.1	0.464348	3.9263	3.00165	0.00464575	0.00464575	-2.1363	NOT
MSTRG.6685.6	-1.31861	-0.101444	-3.00141	0.00464875	0.00464875	-2.10456	DOWN
MSTRG.4864.1	-0.919905	3.464	-3.00122	0.00465108	0.00465108	-2.10423	NOT
XM_018051107.1	-0.847992	2.12296	-3.0001	0.00466505	0.00466505	-2.05219	NOT
XM_018062133.1	1.32892	3.05709	2.99921	0.00467613	0.00467613	-2.13079	UP
XM_005697733.3	-0.750151	4.91125	-2.99912	0.00467725	0.00467725	-2.16473	NOT
XM_018041395.1	1.50633	1.43467	2.99798	0.00469139	0.00469139	-2.06149	UP
XM_018064769.1	1.08779	2.55357	2.99777	0.00469411	0.00469411	-2.08787	UP
XM_018055547.1	1.05212	0.659091	2.99721	0.00470108	0.00470108	-2.05892	UP
MSTRG.4292.3	1.07738	0.189459	2.99707	0.00470285	0.00470285	-2.05817	UP
XM_018050148.1	1.15227	0.514905	2.99696	0.00470421	0.00470421	-2.0576	UP
XM_018041009.1	1.06886	3.30448	2.99667	0.00470786	0.00470786	-2.16232	UP
XM_005694815.3	1.27445	0.33479	2.99614	0.00471448	0.00471448	-2.06408	UP
XM_018052066.1	-0.881561	0.552348	-2.996	0.00471621	0.00471621	-2.08151	NOT
MSTRG.16188.1	0.406327	3.57309	2.99445	0.00473577	0.00473577	-2.13673	NOT
XM_018039674.1	0.388832	3.57695	2.99422	0.00473861	0.00473861	-2.13659	NOT
XM_005678716.3	1.0376	1.08729	2.99371	0.0047451	0.0047451	-2.05959	UP
MSTRG.5775.12	-1.31286	0.212293	-2.99187	0.00476842	0.00476842	-2.11012	DOWN
XM_018047457.1	0.707486	2.41413	2.99128	0.00477582	0.00477582	-2.10981	NOT
XM_005679931.3	-0.668786	7.23171	-2.98967	0.00479631	0.00479631	-2.21348	NOT
XM_005700601.3	-0.432429	5.60816	-2.98967	0.00479641	0.00479641	-2.20062	NOT
XM_005695973.2	2.42355	0.295585	2.98702	0.00483033	0.00483033	-2.07844	UP
MSTRG.6345.3	0.545725	2.7415	2.98621	0.00484062	0.00484062	-2.11252	NOT
XM_018055850.1	1.23308	-0.0527717	2.98584	0.00484549	0.00484549	-2.09034	UP
XM_018043803.1	1.41324	1.23769	2.98461	0.00486126	0.00486126	-2.07985	UP
XM_013969573.2	1.05145	-0.0272941	2.98399	0.00486928	0.00486928	-2.09878	UP
XM_018064531.1	-0.512436	4.66031	-2.9835	0.00487561	0.00487561	-2.19498	NOT
XM_018044471.1	1.60946	1.03373	2.98229	0.00489132	0.00489132	-2.08919	UP
XM_018053489.1	0.940872	-0.224894	2.97976	0.0049243	0.0049243	-2.14971	NOT
XM_018055923.1	1.35226	0.220977	2.97971	0.00492503	0.00492503	-2.08859	UP
MSTRG.17065.2	1.29459	0.130207	2.97967	0.00492551	0.00492551	-2.09751	UP
MSTRG.6385.3	2.30847	0.434831	2.97934	0.00492985	0.00492985	-2.08927	UP
MSTRG.2877.8	1.34717	0.701392	2.97539	0.00498183	0.00498183	-2.09789	UP
NM_001314275.1	1.57915	-0.315852	2.97531	0.00498285	0.00498285	-2.11304	UP
XM_005687695.3	1.25847	1.50749	2.97499	0.0049871	0.0049871	-2.139	UP
XM_018059822.1	-0.717164	2.12941	-2.97462	0.00499204	0.00499204	-2.10256	NOT
MSTRG.9466.2	1.61314	1.2467	2.97229	0.00502297	0.00502297	-2.10664	UP
XM_018061072.1	0.495209	1.79156	2.97207	0.0050259	0.0050259	-2.11095	NOT
XR_001919775.1	0.529474	6.13664	2.96911	0.00506539	0.00506539	-2.25589	NOT
XM_018063796.1	-0.690685	6.74597	-2.96904	0.00506637	0.00506637	-2.25713	NOT
XM_018056522.1	0.441983	3.28147	2.96569	0.00511162	0.00511162	-2.19671	NOT
XM_018045929.1	1.48227	1.33702	2.9632	0.00514537	0.00514537	-2.12401	UP
XM_018052235.1	0.486465	3.31281	2.96302	0.00514786	0.00514786	-2.20805	NOT
MSTRG.15641.3	0.864997	2.19803	2.96019	0.00518658	0.00518658	-2.1483	NOT
XM_005700205.3	0.680501	1.2012	2.95928	0.00519904	0.00519904	-2.13395	NOT
MSTRG.2363.4	-1.57253	0.611197	-2.95682	0.00523301	0.00523301	-2.15665	DOWN
XM_005680980.3	-0.438311	4.85413	-2.95618	0.00524186	0.00524186	-2.26678	NOT
XM_018061697.1	0.961626	1.76457	2.95544	0.0052522	0.0052522	-2.14603	NOT
XM_018043826.1	1.21836	1.30032	2.95421	0.00526931	0.00526931	-2.14751	UP
XR_001918571.1	0.977032	1.31416	2.95246	0.00529368	0.00529368	-2.1533	NOT
XM_005677486.3	0.659986	3.84044	2.95223	0.00529692	0.00529692	-2.25112	NOT
XM_005700819.2	-0.388418	6.66632	-2.95221	0.00529721	0.00529721	-2.30117	NOT
XM_018050928.1	-0.436207	3.59259	-2.95109	0.00531284	0.00531284	-2.22433	NOT
MSTRG.6914.7	0.805802	3.19012	2.9507	0.00531835	0.00531835	-2.23523	NOT
MSTRG.3647.3	-1.08241	0.503084	-2.9507	0.00531844	0.00531844	-2.17625	DOWN
XM_018061243.1	1.12716	0.697407	2.94789	0.00535799	0.00535799	-2.15687	UP
XM_018061884.1	1.52242	0.69484	2.94761	0.0053619	0.0053619	-2.15806	UP
XM_018041303.1	0.583405	3.12705	2.94622	0.00538169	0.00538169	-2.22475	NOT
XM_005680285.3	-0.881611	3.44178	-2.94415	0.00541114	0.00541114	-2.22235	NOT
XM_018060358.1	-1.08528	1.17202	-2.94362	0.00541881	0.00541881	-2.17135	DOWN
XM_018055988.1	0.709746	3.32538	2.94213	0.00544007	0.00544007	-2.24953	NOT
MSTRG.15604.4	1.3748	0.664161	2.94186	0.00544394	0.00544394	-2.17647	UP
XM_018057746.1	1.53822	0.824205	2.9405	0.00546355	0.00546355	-2.17265	UP
XM_018050548.1	0.760137	3.15033	2.94025	0.00546721	0.00546721	-2.25422	NOT
XM_013962747.2	1.52631	-0.0617295	2.93969	0.0054752	0.0054752	-2.18514	UP
XM_005690462.3	-1.56672	1.48711	-2.93834	0.00549475	0.00549475	-2.1885	DOWN
XM_018051079.1	1.13181	0.472692	2.9378	0.00550263	0.00550263	-2.17859	UP
XM_018041216.1	1.23171	0.689566	2.93603	0.00552834	0.00552834	-2.18329	UP
MSTRG.12810.1	1.0791	1.54483	2.93511	0.00554177	0.00554177	-2.19417	UP
XM_005694938.3	-0.417383	3.40317	-2.93469	0.00554786	0.00554786	-2.2547	NOT
MSTRG.10379.1	0.662182	2.67297	2.93444	0.00555158	0.00555158	-2.24513	NOT
NM_001287029.1	-0.472886	10.2804	-2.93198	0.0055876	0.0055876	-2.36725	NOT
XM_018054237.1	-0.773837	0.414978	-2.92785	0.00564881	0.00564881	-2.22219	NOT
XM_018047738.1	0.619412	1.2969	2.92637	0.00567083	0.00567083	-2.20544	NOT
MSTRG.1854.2	1.09549	-0.175599	2.92262	0.00572703	0.00572703	-2.2528	UP
XM_005698442.3	-0.385167	4.11291	-2.92227	0.00573228	0.00573228	-2.31654	NOT
XM_005678753.3	-0.357855	4.20472	-2.92163	0.00574193	0.00574193	-2.32167	NOT
XM_013970170.2	-1.44582	-0.299014	-2.92006	0.00576571	0.00576571	-2.2428	DOWN
XM_018053826.1	1.15078	0.866979	2.91934	0.00577659	0.00577659	-2.2205	UP
MSTRG.9340.1	-1.59076	1.0187	-2.91805	0.00579621	0.00579621	-2.2509	DOWN
XM_018045900.1	-1.03125	0.144547	-2.91698	0.00581265	0.00581265	-2.26624	DOWN
XM_018062781.1	-1.22365	-0.0676749	-2.9168	0.00581528	0.00581528	-2.27213	DOWN
XM_005685667.3	-0.382413	8.29872	-2.91592	0.0058288	0.0058288	-2.39708	NOT
MSTRG.10038.1	0.971103	1.60992	2.91565	0.00583291	0.00583291	-2.24087	NOT
MSTRG.14222.2	-2.25526	0.954436	-2.91548	0.00583557	0.00583557	-2.23207	DOWN
XM_005697786.3	-0.631445	4.28936	-2.91537	0.00583727	0.00583727	-2.35025	NOT
MSTRG.13403.10	1.21074	-0.0991415	2.91232	0.00588416	0.00588416	-2.26698	UP
XM_018056181.1	-0.621672	4.12637	-2.91204	0.00588852	0.00588852	-2.3286	NOT
XM_005676497.3	0.966609	0.777989	2.91204	0.00588856	0.00588856	-2.23361	NOT
XM_005686330.3	-1.44768	0.182053	-2.91183	0.00589179	0.00589179	-2.27228	DOWN
XM_018055067.1	1.14741	0.400313	2.90967	0.00592531	0.00592531	-2.24108	UP
XM_018062632.1	0.586107	2.9372	2.90872	0.00594001	0.00594001	-2.28516	NOT
XM_018041274.1	-0.485479	5.39311	-2.90807	0.00595012	0.00595012	-2.38876	NOT
XM_018066929.1	-0.327601	5.34397	-2.90707	0.00596575	0.00596575	-2.38839	NOT
MSTRG.16686.1	-1.51979	-0.466354	-2.90694	0.00596789	0.00596789	-2.28532	DOWN
MSTRG.1504.1	0.6524	1.26562	2.90641	0.00597623	0.00597623	-2.24491	NOT
XM_005689190.3	0.749321	0.494853	2.90081	0.00606455	0.00606455	-2.26895	NOT
XM_005677489.3	-0.436638	4.99565	-2.89979	0.00608076	0.00608076	-2.39674	NOT
XM_005696753.3	-1.70155	1.96412	-2.8982	0.0061062	0.0061062	-2.32658	DOWN
XM_018060601.1	0.601194	1.82206	2.89592	0.00614267	0.00614267	-2.28102	NOT
XM_018055771.1	-0.956201	2.38086	-2.89513	0.0061554	0.0061554	-2.28096	NOT
XM_018040149.1	1.8115	0.0113298	2.89275	0.00619385	0.00619385	-2.27403	UP
MSTRG.13076.1	0.977737	1.57396	2.89221	0.0062026	0.0062026	-2.27826	NOT
MSTRG.912.1	0.638875	2.15163	2.89084	0.00622488	0.00622488	-2.29509	NOT
XM_013970071.2	1.22726	0.739894	2.88997	0.00623913	0.00623913	-2.27945	UP
XM_018056492.1	1.72137	-0.26508	2.88787	0.00627353	0.00627353	-2.29829	UP
MSTRG.12179.1	-0.630048	2.84282	-2.88698	0.00628818	0.00628818	-2.32463	NOT
XM_005684572.3	0.455303	3.04354	2.88671	0.00629254	0.00629254	-2.34613	NOT
XM_018039248.1	-0.655216	4.39122	-2.88614	0.00630199	0.00630199	-2.40652	NOT
XM_013970374.2	-1.36712	1.30937	-2.88594	0.0063053	0.0063053	-2.28809	DOWN
XM_005681913.3	-1.94716	3.29147	-2.88544	0.00631346	0.00631346	-2.37611	DOWN
MSTRG.2290.1	1.38969	0.0460562	2.8847	0.00632576	0.00632576	-2.2957	UP
MSTRG.9649.2	0.544269	2.23406	2.88412	0.00633534	0.00633534	-2.31834	NOT
MSTRG.9096.2	1.35312	-0.0818153	2.88405	0.00633642	0.00633642	-2.32051	UP
MSTRG.703.1	1.012	1.01341	2.88321	0.0063504	0.0063504	-2.2952	UP
XM_005691261.3	0.525845	3.67342	2.88266	0.00635953	0.00635953	-2.4085	NOT
XM_018061849.1	-0.734286	3.776	-2.8803	0.00639885	0.00639885	-2.41938	NOT
MSTRG.9411.4	-1.32105	0.324306	-2.87988	0.00640591	0.00640591	-2.32368	DOWN
XM_018058133.1	0.457199	4.75868	2.87932	0.00641526	0.00641526	-2.4524	NOT
XM_005680092.3	-0.702063	5.08105	-2.87917	0.00641772	0.00641772	-2.44168	NOT
XM_018067033.1	-0.69182	1.12392	-2.8747	0.00649306	0.00649306	-2.3124	NOT
XM_005676052.2	-0.562175	3.52933	-2.87455	0.00649554	0.00649554	-2.39296	NOT
MSTRG.17163.9	2.78468	0.335472	2.87454	0.0064958	0.0064958	-2.31224	UP
XM_018043248.1	0.511911	1.39011	2.87413	0.00650263	0.00650263	-2.31495	NOT
XM_018047101.1	1.09033	2.20759	2.87348	0.00651382	0.00651382	-2.35877	UP
XR_001919203.1	1.14703	0.232281	2.87339	0.00651528	0.00651528	-2.3269	UP
XM_018044752.1	1.06629	1.89289	2.87228	0.00653423	0.00653423	-2.33211	UP
XM_018055757.1	-0.453014	4.53103	-2.87213	0.00653667	0.00653667	-2.44623	NOT
XM_005685359.3	-0.414514	4.26568	-2.87065	0.00656201	0.00656201	-2.44689	NOT
MSTRG.17163.1	-2.01695	5.79015	-2.87009	0.00657151	0.00657151	-2.47307	DOWN
MSTRG.1282.3	-1.33182	0.17121	-2.86968	0.00657867	0.00657867	-2.36183	DOWN
XM_018062659.1	0.361185	3.57999	2.86872	0.00659501	0.00659501	-2.43716	NOT
XM_018066399.1	0.624751	3.52669	2.86763	0.0066139	0.0066139	-2.43397	NOT
MSTRG.6711.8	1.12223	0.363662	2.8671	0.00662298	0.00662298	-2.34086	UP
MSTRG.2133.1	1.12217	0.956029	2.8671	0.00662304	0.00662304	-2.328	UP
XM_005698833.3	1.00654	1.82499	2.86697	0.0066252	0.0066252	-2.33929	UP
MSTRG.3772.3	0.878364	0.561623	2.86658	0.006632	0.006632	-2.33354	NOT
MSTRG.17605.1	0.527793	2.62705	2.86602	0.00664162	0.00664162	-2.38298	NOT
MSTRG.1988.2	1.27788	1.25119	2.86314	0.00669172	0.00669172	-2.34873	UP
MSTRG.1870.1	0.975519	0.246201	2.8628	0.00669761	0.00669761	-2.35554	NOT
XM_018066312.1	1.05063	-0.174196	2.86189	0.00671346	0.00671346	-2.3435	UP
MSTRG.4856.1	0.643086	1.54086	2.86152	0.00671989	0.00671989	-2.34635	NOT
XM_005693865.3	-0.349058	4.66716	-2.86067	0.00673486	0.00673486	-2.48106	NOT
MSTRG.12064.1	0.624325	3.402	2.85918	0.00676093	0.00676093	-2.44515	NOT
MSTRG.5524.1	0.501359	3.5652	2.85899	0.00676425	0.00676425	-2.46655	NOT
XM_018053842.1	1.03765	0.590391	2.85296	0.00687123	0.00687123	-2.36131	UP
XM_005678914.3	-1.04105	0.625536	-2.85285	0.00687322	0.00687322	-2.36824	DOWN
XM_018061052.1	0.756964	1.63878	2.84926	0.00693752	0.00693752	-2.3844	NOT
MSTRG.616.2	0.631434	1.9155	2.84906	0.00694118	0.00694118	-2.37921	NOT
XM_005699882.3	-0.703999	4.19933	-2.84733	0.00697238	0.00697238	-2.52276	NOT
XM_018060287.1	-1.25089	0.61723	-2.8467	0.00698384	0.00698384	-2.38305	DOWN
XM_018056748.1	0.401759	2.60572	2.84646	0.0069883	0.0069883	-2.41659	NOT
XM_005697661.3	-0.648732	5.40734	-2.84624	0.00699219	0.00699219	-2.5277	NOT
XM_018039368.1	0.340677	3.25334	2.8461	0.00699478	0.00699478	-2.45981	NOT
XR_001918819.1	-0.689943	0.950755	-2.846	0.00699657	0.00699657	-2.37901	NOT
XM_018040239.1	0.99879	-0.0147529	2.84586	0.00699906	0.00699906	-2.37208	NOT
MSTRG.8178.4	0.892332	2.20424	2.84522	0.00701074	0.00701074	-2.40886	NOT
MSTRG.15175.5	1.18242	0.503243	2.84386	0.00703561	0.00703561	-2.37973	UP
XM_018048319.1	-1.06348	0.196204	-2.84207	0.00706826	0.00706826	-2.39898	DOWN
MSTRG.2680.4	1.07459	1.80332	2.83925	0.0071201	0.0071201	-2.40249	UP
XM_013971361.2	-1.36062	0.25638	-2.83686	0.00716438	0.00716438	-2.40952	DOWN
XM_013962542.2	-0.582753	1.72007	-2.83614	0.00717786	0.00717786	-2.39376	NOT
XM_018039556.1	-0.779119	4.46585	-2.83612	0.00717812	0.00717812	-2.50904	NOT
MSTRG.2202.3	-1.33021	0.160977	-2.83605	0.00717942	0.00717942	-2.40878	DOWN
XM_005696141.3	-0.512293	5.56384	-2.83476	0.00720352	0.00720352	-2.55679	NOT
XM_018063481.1	1.2215	0.840766	2.83463	0.00720598	0.00720598	-2.39466	UP
XM_018048666.1	1.2109	0.414978	2.8344	0.00721018	0.00721018	-2.39523	UP
XM_018061334.1	0.695056	2.11949	2.83426	0.00721291	0.00721291	-2.43849	NOT
XM_018055515.1	0.613254	1.26222	2.83398	0.00721807	0.00721807	-2.40419	NOT
MSTRG.14195.4	1.44488	1.8914	2.83389	0.00721972	0.00721972	-2.45488	UP
MSTRG.9199.2	-1.67438	2.89871	-2.82872	0.00731699	0.00731699	-2.42873	DOWN
XM_018044661.1	1.16086	2.71425	2.82856	0.0073201	0.0073201	-2.47129	UP
XM_013975916.2	1.2924	0.0211326	2.82825	0.00732591	0.00732591	-2.41308	UP
XM_018058555.1	-1.03618	-0.247728	-2.82782	0.00733405	0.00733405	-2.43365	DOWN
XM_018044296.1	-0.589733	2.01617	-2.82685	0.00735249	0.00735249	-2.42081	NOT
XM_018065451.1	-1.39762	0.209515	-2.82664	0.00735658	0.00735658	-2.41364	DOWN
MSTRG.10195.1	0.453265	2.6853	2.82484	0.00739089	0.00739089	-2.47587	NOT
XM_018056709.1	1.01149	0.206724	2.82463	0.00739497	0.00739497	-2.41843	UP
XM_018062018.1	-0.500415	3.15913	-2.82011	0.00748186	0.00748186	-2.48123	NOT
XM_018045938.1	1.28071	0.740016	2.81899	0.00750356	0.00750356	-2.42773	UP
XM_018044907.1	-0.875895	2.45191	-2.81878	0.00750763	0.00750763	-2.44626	NOT
XM_018054275.1	-1.11032	0.204452	-2.81872	0.00750867	0.00750867	-2.45525	DOWN
XM_005695408.3	-1.22336	6.00695	-2.81792	0.00752432	0.00752432	-2.60389	DOWN
XM_005692420.3	-1.43899	-0.0513046	-2.81688	0.00754453	0.00754453	-2.443	DOWN
MSTRG.9226.7	0.7728	0.372551	2.81605	0.00756062	0.00756062	-2.44773	NOT
MSTRG.14997.2	0.492574	2.72914	2.81587	0.00756429	0.00756429	-2.50618	NOT
XR_001295535.2	0.821318	3.8092	2.8154	0.00757346	0.00757346	-2.57051	NOT
XM_018048347.1	-0.965403	-0.448674	-2.81464	0.00758817	0.00758817	-2.46044	NOT
XM_005690076.3	-0.41242	2.59907	-2.81426	0.00759578	0.00759578	-2.47178	NOT
XM_005691619.3	-0.43596	5.69997	-2.81424	0.00759618	0.00759618	-2.60752	NOT
XM_018040036.1	0.919032	1.02346	2.81376	0.0076055	0.0076055	-2.43922	NOT
XM_018060391.1	-1.14375	0.494269	-2.81105	0.00765896	0.00765896	-2.45935	DOWN
XM_005699457.3	-1.46229	2.2734	-2.81078	0.00766427	0.00766427	-2.47649	DOWN
XR_001917381.1	0.544432	3.45444	2.80937	0.00769212	0.00769212	-2.53689	NOT
XM_005682110.3	-1.0399	0.599642	-2.80837	0.00771194	0.00771194	-2.45707	DOWN
XM_018051213.1	-1.60763	-0.309698	-2.80682	0.00774293	0.00774293	-2.47754	DOWN
XM_018056785.1	0.904646	0.218	2.80681	0.00774301	0.00774301	-2.45561	NOT
XM_018051080.1	1.04672	0.373198	2.80668	0.00774568	0.00774568	-2.45386	UP
XM_005700603.3	-0.468137	7.38063	-2.80616	0.00775609	0.00775609	-2.6434	NOT
XM_018053476.1	1.44942	0.544335	2.80386	0.00780218	0.00780218	-2.45896	UP
XM_018061699.1	1.26147	-0.702596	2.8024	0.0078316	0.0078316	-2.48594	UP
XM_018059026.1	1.22679	-0.142076	2.80124	0.00785492	0.00785492	-2.47361	UP
MSTRG.12813.1	1.59776	1.36638	2.80049	0.00787019	0.00787019	-2.50099	UP
MSTRG.15626.1	1.03472	0.101443	2.79921	0.00789611	0.00789611	-2.47898	UP
XM_018057123.1	0.880246	0.0971938	2.7969	0.00794334	0.00794334	-2.47548	NOT
MSTRG.2270.1	0.535591	2.81692	2.79639	0.00795373	0.00795373	-2.54458	NOT
XM_018047439.1	-0.739507	4.61343	-2.79603	0.00796107	0.00796107	-2.64309	NOT
MSTRG.7710.4	1.34017	0.468529	2.79472	0.00798803	0.00798803	-2.47689	UP
MSTRG.11799.2	0.416406	2.5814	2.79404	0.00800191	0.00800191	-2.54068	NOT
XM_018054335.1	1.28992	0.493956	2.79358	0.00801142	0.00801142	-2.48265	UP
MSTRG.17926.1	0.288422	3.97479	2.79358	0.0080115	0.0080115	-2.61554	NOT
XM_013969108.2	0.517391	1.75625	2.79357	0.00801163	0.00801163	-2.50139	NOT
XM_005688214.3	1.32482	3.63958	2.7927	0.00802962	0.00802962	-2.6234	UP
XM_013965716.2	0.325824	2.97904	2.7925	0.00803376	0.00803376	-2.55209	NOT
XM_005691329.3	0.633148	1.35289	2.79236	0.00803662	0.00803662	-2.5008	NOT
MSTRG.9206.1	-0.498013	1.11961	-2.7922	0.00803991	0.00803991	-2.48426	NOT
XM_018064467.1	-0.422911	4.66171	-2.7917	0.00805031	0.00805031	-2.62866	NOT
XM_018062385.1	-1.55314	0.752293	-2.79132	0.00805815	0.00805815	-2.48762	DOWN
MSTRG.14711.11	1.41032	0.00535018	2.79117	0.00806121	0.00806121	-2.48347	UP
MSTRG.9586.2	0.817725	1.73257	2.78977	0.0080903	0.0080903	-2.50869	NOT
XR_001295797.2	0.823647	1.06147	2.78965	0.00809283	0.00809283	-2.49123	NOT
XM_018059587.1	-0.292678	6.24645	-2.78953	0.00809515	0.00809515	-2.66918	NOT
MSTRG.13364.3	1.33352	0.605044	2.78942	0.00809759	0.00809759	-2.48804	UP
XM_018049165.1	-0.372426	5.88399	-2.78934	0.0080991	0.0080991	-2.66469	NOT
XM_018060661.1	0.562881	0.811113	2.78921	0.00810186	0.00810186	-2.49068	NOT
MSTRG.5285.1	-2.58657	2.01387	-2.789	0.00810621	0.00810621	-2.48916	DOWN
XM_018042241.1	-1.20731	1.07668	-2.78759	0.00813571	0.00813571	-2.49773	DOWN
XM_018051771.1	-1.43562	0.263814	-2.78659	0.00815662	0.00815662	-2.50575	DOWN
XR_001918483.1	1.14271	-0.593352	2.78655	0.00815738	0.00815738	-2.51531	UP
XM_018046216.1	1.42178	0.56627	2.78476	0.0081951	0.0081951	-2.50259	UP
MSTRG.8621.1	1.21657	-0.226722	2.78471	0.00819611	0.00819611	-2.52289	UP
MSTRG.13310.1	-5.60689	3.3007	-2.78353	0.00822092	0.00822092	-2.53769	DOWN
XM_018044469.1	1.19306	0.170588	2.78264	0.00823977	0.00823977	-2.50082	UP
XM_018058514.1	0.310073	4.0449	2.78243	0.0082441	0.0082441	-2.64066	NOT
MSTRG.14248.2	1.12651	2.08482	2.7813	0.00826811	0.00826811	-2.52736	UP
MSTRG.1772.14	1.10293	0.36097	2.77534	0.00839545	0.00839545	-2.5156	UP
XM_018052369.1	0.34222	4.00537	2.77379	0.00842898	0.00842898	-2.66385	NOT
MSTRG.10203.4	0.844526	0.388517	2.77152	0.00847797	0.00847797	-2.52899	NOT
XM_005700752.3	-0.326014	2.72736	-2.77141	0.00848046	0.00848046	-2.58348	NOT
XM_013973951.2	1.59705	0.322565	2.77132	0.00848245	0.00848245	-2.52394	UP
XM_005680886.3	-1.1021	1.16872	-2.77005	0.00850994	0.00850994	-2.53299	DOWN
MSTRG.14238.1	0.697578	3.59682	2.76856	0.00854255	0.00854255	-2.65141	NOT
MSTRG.9747.4	-1.57643	-0.216928	-2.76791	0.00855678	0.00855678	-2.54408	DOWN
XM_005679343.3	-0.409975	5.28572	-2.7663	0.00859204	0.00859204	-2.70621	NOT
XM_018041176.1	0.683253	1.46711	2.76629	0.00859227	0.00859227	-2.54334	NOT
XM_018049479.1	-1.15363	0.388799	-2.76482	0.00862473	0.00862473	-2.55235	DOWN
XM_018043295.1	-1.23441	0.474603	-2.7632	0.00866048	0.00866048	-2.54826	DOWN
XM_005692524.3	0.591888	3.80708	2.76309	0.00866299	0.00866299	-2.69788	NOT
MSTRG.2888.2	0.469135	1.57259	2.76305	0.00866386	0.00866386	-2.55371	NOT
XM_018039392.1	-1.23872	0.19725	-2.76162	0.00869569	0.00869569	-2.54717	DOWN
XM_018057426.1	-0.359645	4.36896	-2.76125	0.00870387	0.00870387	-2.69701	NOT
XM_018061951.1	-1.10479	-0.0530532	-2.76087	0.00871226	0.00871226	-2.56563	DOWN
XM_005679966.3	0.611319	3.9399	2.76061	0.0087181	0.0087181	-2.67168	NOT
XM_005677341.3	-0.499851	2.48333	-2.76052	0.00872008	0.00872008	-2.58194	NOT
XM_018047665.1	0.964829	1.57413	2.75917	0.00875033	0.00875033	-2.5674	NOT
MSTRG.5692.5	0.791538	2.23397	2.75779	0.00878106	0.00878106	-2.58642	NOT
XM_018048342.1	-1.37999	0.763004	-2.75744	0.00878902	0.00878902	-2.55426	DOWN
MSTRG.4727.7	0.431976	2.25905	2.75313	0.00888633	0.00888633	-2.59996	NOT
XM_018053423.1	-0.791427	1.67819	-2.75284	0.00889276	0.00889276	-2.5651	NOT
XR_001918852.1	0.662517	0.938297	2.75248	0.00890099	0.00890099	-2.56324	NOT
XM_018049622.1	0.92164	2.37775	2.75156	0.00892195	0.00892195	-2.62263	NOT
XM_018041298.1	0.710073	1.07271	2.75095	0.00893592	0.00893592	-2.56519	NOT
XM_005677399.3	-0.344626	3.15088	-2.75094	0.00893619	0.00893619	-2.65821	NOT
XM_005696446.3	-0.73465	5.05099	-2.75008	0.00895562	0.00895562	-2.72651	NOT
XM_018048419.1	0.589248	1.666	2.74947	0.00896972	0.00896972	-2.5995	NOT
MSTRG.15913.6	1.09742	0.708727	2.74793	0.00900493	0.00900493	-2.5724	UP
MSTRG.7747.1	1.13475	-0.041777	2.74568	0.00905672	0.00905672	-2.58971	UP
XM_018052474.1	1.17013	-0.395752	2.74538	0.00906359	0.00906359	-2.58515	UP
XM_018043858.1	0.571704	1.33269	2.74479	0.00907743	0.00907743	-2.58475	NOT
XM_005681343.3	0.484804	2.24313	2.74423	0.00909026	0.00909026	-2.60961	NOT
MSTRG.17200.5	3.39693	0.524971	2.74335	0.00911067	0.00911067	-2.58048	UP
XM_018061582.1	0.729603	1.91101	2.74296	0.00911977	0.00911977	-2.6123	NOT
XM_018065762.1	-0.837786	0.873339	-2.74249	0.00913074	0.00913074	-2.58152	NOT
MSTRG.4691.5	0.619869	3.43852	2.74243	0.00913204	0.00913204	-2.70173	NOT
XM_018044649.1	1.11901	1.51652	2.7424	0.00913271	0.00913271	-2.60876	UP
XM_018049736.1	0.369805	2.94477	2.74239	0.00913303	0.00913303	-2.6652	NOT
XM_018065740.1	1.20734	2.20137	2.74176	0.00914765	0.00914765	-2.62972	UP
XM_018048261.1	-0.965421	0.0626633	-2.74019	0.00918428	0.00918428	-2.60263	NOT
XM_018060251.1	0.719743	0.955983	2.73946	0.00920131	0.00920131	-2.59023	NOT
XM_005677142.3	-0.376242	3.72615	-2.73358	0.00934009	0.00934009	-2.71493	NOT
XM_005700869.3	-0.445732	6.24679	-2.73356	0.00934054	0.00934054	-2.7963	NOT
XM_005691142.3	-1.23127	0.255121	-2.73236	0.00936908	0.00936908	-2.60195	DOWN
XM_018039448.1	0.961569	1.30134	2.73089	0.00940429	0.00940429	-2.62845	NOT
XM_005677960.3	-0.472869	6.74436	-2.72909	0.0094474	0.0094474	-2.80895	NOT
MSTRG.1471.1	0.669826	1.77037	2.7278	0.00947836	0.00947836	-2.62465	NOT
MSTRG.6196.1	1.06526	3.40117	2.72773	0.00948007	0.00948007	-2.77018	UP
XM_018052750.1	1.01198	1.29299	2.72764	0.00948214	0.00948214	-2.6341	UP
XM_018061805.1	0.451654	1.24796	2.72523	0.00954054	0.00954054	-2.62969	NOT
XM_018048038.1	1.23833	0.0673638	2.72442	0.00956	0.00956	-2.61785	UP
MSTRG.3585.1	0.615248	3.97545	2.72441	0.00956044	0.00956044	-2.76372	NOT
MSTRG.10743.1	0.524166	1.74235	2.72327	0.00958798	0.00958798	-2.63217	NOT
XM_018038506.1	-1.97569	-0.322745	-2.72192	0.00962097	0.00962097	-2.62966	DOWN
MSTRG.17125.2	1.19249	1.70443	2.72082	0.00964798	0.00964798	-2.65441	UP
XM_018054397.1	0.518664	3.1446	2.71981	0.00967255	0.00967255	-2.72051	NOT
MSTRG.15525.2	-1.25476	4.49677	-2.7192	0.00968762	0.00968762	-2.79543	DOWN
MSTRG.8302.3	1.78892	1.69105	2.71892	0.00969444	0.00969444	-2.67178	UP
MSTRG.3093.6	-1.33945	-0.294098	-2.71737	0.0097326	0.0097326	-2.64812	DOWN
XM_005696367.3	1.29177	0.335849	2.71729	0.00973457	0.00973457	-2.63707	UP
XM_005683188.3	-0.569054	5.14075	-2.71626	0.0097601	0.0097601	-2.81132	NOT
XR_001917650.1	0.680077	2.90059	2.71556	0.00977735	0.00977735	-2.73731	NOT
XM_018061347.1	0.795595	1.19571	2.7152	0.00978638	0.00978638	-2.6405	NOT
MSTRG.10449.9	1.12497	1.09735	2.71503	0.00979067	0.00979067	-2.65223	UP
MSTRG.8360.1	1.05771	1.61962	2.71457	0.00980191	0.00980191	-2.65233	UP
XM_005685914.3	0.765619	0.740693	2.71449	0.00980399	0.00980399	-2.63734	NOT
MSTRG.11291.1	0.982767	0.68569	2.71401	0.00981585	0.00981585	-2.63826	NOT
MSTRG.13879.5	1.11857	1.63315	2.71395	0.00981745	0.00981745	-2.66599	UP
MSTRG.4305.2	1.17705	-0.0967795	2.71194	0.00986762	0.00986762	-2.64987	UP
MSTRG.3614.10	1.20311	1.89922	2.71186	0.0098695	0.0098695	-2.69359	UP
XM_018066825.1	1.08394	1.37679	2.71138	0.00988144	0.00988144	-2.66504	UP
MSTRG.3147.1	-0.755634	2.28442	-2.71079	0.0098962	0.0098962	-2.67366	NOT
XM_005675211.3	-0.72573	1.52625	-2.71038	0.00990663	0.00990663	-2.6491	NOT
XM_018042847.1	1.07035	0.736638	2.71016	0.0099121	0.0099121	-2.65078	UP
XM_018062325.1	-0.656157	3.17016	-2.70935	0.00993252	0.00993252	-2.74913	NOT
MSTRG.11162.1	0.764539	2.01092	2.70793	0.0099683	0.0099683	-2.67391	NOT
XM_018064608.1	-1.17521	0.318898	-2.70622	0.0100115	0.0100115	-2.66033	DOWN
XM_018057431.1	1.08412	0.779947	2.70537	0.010033	0.010033	-2.65531	UP
XM_018040609.1	0.400969	3.9218	2.70485	0.0100461	0.0100461	-2.8096	NOT
MSTRG.4200.3	-1.89149	1.65965	-2.70467	0.0100508	0.0100508	-2.67185	DOWN
MSTRG.486.6	1.10992	0.843812	2.70411	0.0100649	0.0100649	-2.65872	UP
MSTRG.13180.4	0.585369	2.23744	2.70407	0.0100661	0.0100661	-2.70602	NOT
MSTRG.2666.3	-3.72432	0.974788	-2.70325	0.010087	0.010087	-2.66011	DOWN
XM_018057122.1	1.17339	0.93995	2.70248	0.0101066	0.0101066	-2.66503	UP
XR_001918140.1	1.26537	0.338894	2.70225	0.0101124	0.0101124	-2.66155	UP
XM_018046823.1	0.389311	4.20658	2.70206	0.0101175	0.0101175	-2.82435	NOT
MSTRG.16560.1	1.18112	0.0736937	2.7019	0.0101215	0.0101215	-2.66212	UP
MSTRG.13253.9	0.866515	2.33577	2.70145	0.010133	0.010133	-2.72088	NOT
XM_018057819.1	0.706399	1.80085	2.69984	0.0101742	0.0101742	-2.7046	NOT
XM_018065736.1	1.08274	0.454149	2.69922	0.0101903	0.0101903	-2.67045	UP
XM_018039436.1	1.29562	0.890234	2.69847	0.0102097	0.0102097	-2.67921	UP
MSTRG.3284.1	1.1379	1.91213	2.69769	0.0102297	0.0102297	-2.7016	UP
MSTRG.4128.5	0.869207	1.59404	2.69717	0.0102431	0.0102431	-2.68742	NOT
XM_018054827.1	-0.553314	5.12123	-2.69699	0.0102479	0.0102479	-2.85876	NOT
XM_018038325.1	0.776383	0.330589	2.69678	0.0102534	0.0102534	-2.67552	NOT
XM_005691669.3	-0.962242	0.104839	-2.69616	0.0102693	0.0102693	-2.67843	NOT
MSTRG.7384.17	-1.93926	0.104265	-2.69566	0.0102822	0.0102822	-2.68105	DOWN
XM_005683534.3	-0.431963	2.3559	-2.69468	0.0103077	0.0103077	-2.71263	NOT
XM_018046653.1	0.848002	1.28397	2.69442	0.0103146	0.0103146	-2.69458	NOT
MSTRG.7091.1	-1.19012	0.784468	-2.69397	0.0103262	0.0103262	-2.67766	DOWN
XM_018060199.1	1.05442	0.156105	2.69328	0.0103442	0.0103442	-2.68059	UP
XM_005679774.3	0.649028	0.920564	2.69288	0.0103547	0.0103547	-2.7022	NOT
XM_018061598.1	0.458856	3.13853	2.69042	0.0104191	0.0104191	-2.8105	NOT
XM_005682526.3	-0.372459	5.29104	-2.6883	0.0104751	0.0104751	-2.88609	NOT
MSTRG.3523.2	1.39188	0.95638	2.68818	0.0104781	0.0104781	-2.68887	UP
XM_018050011.1	0.605367	3.30292	2.68538	0.0105524	0.0105524	-2.82961	NOT
MSTRG.14075.1	-2.52011	2.20342	-2.68257	0.0106275	0.0106275	-2.69983	DOWN
XM_018063635.1	0.682685	3.26795	2.68251	0.010629	0.010629	-2.8387	NOT
XM_005694143.3	-0.46979	2.71983	-2.68235	0.0106332	0.0106332	-2.76315	NOT
XM_018048651.1	0.485721	3.17147	2.6816	0.0106534	0.0106534	-2.81046	NOT
MSTRG.8276.3	1.1438	0.307898	2.6807	0.0106776	0.0106776	-2.70346	UP
MSTRG.13577.3	0.461903	2.03829	2.6805	0.0106828	0.0106828	-2.74618	NOT
XM_018053664.1	0.682363	3.87339	2.67942	0.0107121	0.0107121	-2.88783	NOT
XM_005696358.2	-0.343692	8.16922	-2.67866	0.0107325	0.0107325	-2.93182	NOT
MSTRG.15558.7	0.999704	1.5534	2.67802	0.0107498	0.0107498	-2.77565	NOT
MSTRG.1116.1	0.452596	2.22409	2.67795	0.0107519	0.0107519	-2.75013	NOT
XM_005687094.3	0.280537	4.04512	2.67769	0.0107588	0.0107588	-2.87256	NOT
MSTRG.15890.1	0.689412	2.12216	2.67743	0.0107658	0.0107658	-2.76585	NOT
XM_018046404.1	1.08865	-0.114326	2.67655	0.0107896	0.0107896	-2.72111	UP
MSTRG.15404.1	0.706799	3.27454	2.67513	0.0108284	0.0108284	-2.83585	NOT
XM_005693237.3	-0.961883	1.92804	-2.67497	0.0108327	0.0108327	-2.73024	NOT
XM_018059736.1	1.17954	0.230462	2.67495	0.0108331	0.0108331	-2.71494	UP
XM_018050216.1	0.784031	2.91627	2.67485	0.0108359	0.0108359	-2.82883	NOT
XM_018042932.1	0.683971	4.09123	2.67438	0.0108488	0.0108488	-2.88905	NOT
XM_018052461.1	0.945547	0.627965	2.67436	0.0108492	0.0108492	-2.71606	NOT
XM_018040432.1	0.619328	2.98435	2.67359	0.0108704	0.0108704	-2.85861	NOT
MSTRG.6592.1	1.84175	2.31366	2.67248	0.0109006	0.0109006	-2.87333	UP
XM_005677834.2	0.328565	3.76334	2.67116	0.010937	0.010937	-2.86453	NOT
XM_005686813.3	-0.492396	3.63942	-2.67109	0.0109388	0.0109388	-2.8532	NOT
XM_018040130.1	0.686832	1.14251	2.67065	0.0109508	0.0109508	-2.72755	NOT
XM_018051077.1	1.15134	0.627645	2.67	0.0109687	0.0109687	-2.74591	UP
XM_018048981.1	-1.05291	0.19356	-2.66864	0.0110064	0.0110064	-2.73164	DOWN
XM_018040471.1	-0.437246	4.02381	-2.66843	0.0110123	0.0110123	-2.87469	NOT
XM_018051347.1	0.581215	1.50254	2.66756	0.0110362	0.0110362	-2.75032	NOT
XM_005686652.3	1.11399	4.68852	2.66736	0.0110419	0.0110419	-2.93774	UP
XM_018065115.1	0.507933	1.96462	2.66643	0.0110676	0.0110676	-2.78112	NOT
XM_018062586.1	-1.07012	1.31631	-2.6664	0.0110685	0.0110685	-2.73906	DOWN
XM_018048625.1	-1.0563	1.70502	-2.66638	0.011069	0.011069	-2.74647	DOWN
XM_018051602.1	0.427752	2.56392	2.66598	0.0110802	0.0110802	-2.80113	NOT
XM_018053458.1	0.985978	3.42349	2.66537	0.0110973	0.0110973	-2.89751	NOT
XM_013966480.2	0.560423	2.45444	2.66485	0.0111115	0.0111115	-2.81519	NOT
XM_005679718.3	0.341437	3.03556	2.66429	0.0111274	0.0111274	-2.84313	NOT
XM_018062913.1	1.39825	0.330082	2.65899	0.0112763	0.0112763	-2.74639	UP
MSTRG.8620.5	0.983518	1.17866	2.65887	0.0112795	0.0112795	-2.74669	NOT
MSTRG.9840.1	0.448606	3.09731	2.6587	0.0112843	0.0112843	-2.85346	NOT
XM_005698483.3	-0.960077	3.30849	-2.65805	0.0113028	0.0113028	-2.83648	NOT
XM_018045228.1	0.411798	2.55924	2.65762	0.011315	0.011315	-2.82113	NOT
MSTRG.8115.1	0.588396	1.05868	2.65756	0.0113167	0.0113167	-2.75228	NOT
MSTRG.4864.5	-1.22718	1.04734	-2.65756	0.0113168	0.0113168	-2.76497	DOWN
MSTRG.14588.1	0.87112	1.75271	2.65659	0.0113441	0.0113441	-2.77152	NOT
XM_018064940.1	0.614206	2.0255	2.65454	0.0114026	0.0114026	-2.79	NOT
XM_018065885.1	1.28386	-0.105412	2.65418	0.011413	0.011413	-2.76484	UP
XM_005694739.3	-0.721044	3.96968	-2.65382	0.0114231	0.0114231	-2.92769	NOT
XM_018061207.1	1.01352	0.805454	2.65377	0.0114247	0.0114247	-2.75807	UP
XM_018040605.1	1.29701	1.44933	2.65242	0.0114632	0.0114632	-2.81124	UP
XM_018049577.1	-0.996089	0.238221	-2.6517	0.0114842	0.0114842	-2.75976	NOT
XM_018059514.1	-1.23105	0.0527907	-2.65077	0.0115108	0.0115108	-2.77196	DOWN
XM_005695915.3	0.947182	4.1341	2.65045	0.01152	0.01152	-2.94818	NOT
XM_018051651.1	0.562199	2.09393	2.65042	0.011521	0.011521	-2.82995	NOT
MSTRG.1604.1	1.06135	2.48224	2.64959	0.011545	0.011545	-2.83725	UP
MSTRG.10767.7	1.41	0.975597	2.64951	0.0115471	0.0115471	-2.76517	UP
XM_018039162.1	0.96086	0.304782	2.64942	0.0115498	0.0115498	-2.76441	NOT
XM_005685765.3	-0.45417	2.78729	-2.64816	0.0115861	0.0115861	-2.84125	NOT
MSTRG.17935.1	0.543305	1.41691	2.64632	0.0116398	0.0116398	-2.78967	NOT
XM_018050986.1	1.08621	2.46163	2.64591	0.0116516	0.0116516	-2.8293	UP
XM_005691351.3	-0.567144	2.05087	-2.64574	0.0116566	0.0116566	-2.7991	NOT
XM_018038869.1	1.0422	-0.212353	2.64572	0.0116571	0.0116571	-2.77135	UP
MSTRG.9770.4	1.37952	0.972899	2.6431	0.0117338	0.0117338	-2.785	UP
MSTRG.2702.3	-1.23813	0.733672	-2.64289	0.01174	0.01174	-2.77767	DOWN
XM_018047078.1	-0.663143	2.43843	-2.64222	0.0117598	0.0117598	-2.83544	NOT
XM_005692929.3	-0.942996	0.760379	-2.64159	0.0117782	0.0117782	-2.78059	NOT
XM_005690390.3	1.24969	0.406922	2.64048	0.0118108	0.0118108	-2.78232	UP
XM_018052911.1	1.0333	3.28612	2.63926	0.0118468	0.0118468	-2.95987	UP
MSTRG.200.1	0.623631	2.02004	2.63861	0.0118662	0.0118662	-2.82734	NOT
MSTRG.5844.4	0.677954	2.38108	2.63725	0.0119064	0.0119064	-2.8591	NOT
MSTRG.17175.3	0.749381	2.49	2.6371	0.0119111	0.0119111	-2.87126	NOT
XM_018066669.1	1.15371	0.100821	2.63626	0.011936	0.011936	-2.78997	UP
XR_001919829.1	-0.533806	1.48675	-2.63616	0.011939	0.011939	-2.80323	NOT
MSTRG.10928.1	0.552601	1.72201	2.63605	0.0119424	0.0119424	-2.81388	NOT
MSTRG.1392.1	0.814895	0.834139	2.63584	0.0119484	0.0119484	-2.79093	NOT
XM_005696284.3	-0.452567	2.76909	-2.63583	0.0119489	0.0119489	-2.8649	NOT
XM_013964569.2	1.84654	1.29184	2.63567	0.0119536	0.0119536	-2.89422	UP
XM_005687459.3	1.07263	1.06141	2.63532	0.0119639	0.0119639	-2.83526	UP
MSTRG.17175.5	0.811095	2.44181	2.63466	0.0119838	0.0119838	-2.86645	NOT
XM_018059798.1	0.413932	3.01797	2.63371	0.0120121	0.0120121	-2.90064	NOT
XM_018051953.1	0.996313	-0.113343	2.63357	0.0120165	0.0120165	-2.795	NOT
XM_005688494.3	-0.290284	2.62736	-2.63338	0.0120219	0.0120219	-2.8595	NOT
MSTRG.5218.8	0.662414	1.17496	2.63313	0.0120296	0.0120296	-2.8043	NOT
XM_005685017.3	-0.339321	5.83499	-2.63072	0.012102	0.012102	-3.01579	NOT
XM_005683032.3	-0.415548	4.26714	-2.62921	0.0121479	0.0121479	-2.97679	NOT
XM_018051816.1	-0.689218	1.40743	-2.62907	0.012152	0.012152	-2.80589	NOT
MSTRG.1731.1	1.50661	1.53688	2.62877	0.012161	0.012161	-2.80721	UP
XM_005689191.3	0.789135	0.260402	2.62776	0.0121917	0.0121917	-2.80593	NOT
MSTRG.6218.3	1.0211	1.3021	2.62547	0.0122616	0.0122616	-2.81434	UP
MSTRG.7967.2	1.09977	0.188757	2.6244	0.0122943	0.0122943	-2.81348	UP
XM_018052024.1	0.455742	2.65271	2.62351	0.0123214	0.0123214	-2.9129	NOT
XM_018052035.1	0.892477	0.972598	2.62309	0.0123344	0.0123344	-2.83961	NOT
XM_018049704.1	0.805078	0.990906	2.62263	0.0123484	0.0123484	-2.84602	NOT
MSTRG.2115.1	0.79418	3.57291	2.62227	0.0123596	0.0123596	-2.98977	NOT
XM_018056637.1	0.782155	2.90402	2.62144	0.012385	0.012385	-2.93904	NOT
MSTRG.10235.9	-1.34873	0.632743	-2.62083	0.012404	0.012404	-2.81902	DOWN
XM_018058507.1	-0.500645	2.62101	-2.62053	0.0124131	0.0124131	-2.8849	NOT
MSTRG.1573.1	-0.949294	0.724086	-2.62037	0.0124182	0.0124182	-2.81984	NOT
XM_018054619.1	-0.291981	6.98955	-2.61989	0.012433	0.012433	-3.04953	NOT
XM_018053950.1	-1.10127	-0.172674	-2.61942	0.0124476	0.0124476	-2.83191	DOWN
MSTRG.5033.1	-1.41216	0.0015955	-2.61922	0.0124539	0.0124539	-2.8244	DOWN
XM_018058313.1	-0.424644	5.56756	-2.61805	0.0124899	0.0124899	-3.03614	NOT
XM_013970480.2	-1.61485	0.443886	-2.61792	0.0124942	0.0124942	-2.82844	DOWN
XM_018043799.1	1.31296	1.0617	2.61731	0.0125131	0.0125131	-2.84153	UP
XM_005697172.2	-0.404438	2.03695	-2.61696	0.012524	0.012524	-2.86613	NOT
XM_018064603.1	0.939785	0.15945	2.61674	0.0125306	0.0125306	-2.82695	NOT
XM_018062504.1	-1.48853	2.05633	-2.61623	0.0125465	0.0125465	-2.85223	DOWN
XM_018061210.1	1.03365	0.42319	2.61594	0.0125559	0.0125559	-2.82828	UP
MSTRG.748.2	0.917871	0.0803488	2.61479	0.0125916	0.0125916	-2.8308	NOT
XM_018040265.1	0.740125	0.616625	2.61426	0.0126082	0.0126082	-2.83231	NOT
MSTRG.16763.35	1.53092	0.234487	2.61414	0.012612	0.012612	-2.83728	UP
XM_018058812.1	-1.29202	0.280208	-2.61344	0.0126341	0.0126341	-2.83629	DOWN
XM_018041916.1	-1.18242	-0.195088	-2.61343	0.0126342	0.0126342	-2.84111	DOWN
MSTRG.4731.1	-1.50555	-0.750002	-2.61258	0.012661	0.012661	-2.84271	DOWN
XM_005683338.3	-0.272411	3.65302	-2.612	0.0126791	0.0126791	-2.98166	NOT
XM_018061727.1	0.707032	0.859014	2.61151	0.0126947	0.0126947	-2.85804	NOT
MSTRG.9417.2	0.788394	0.306772	2.61136	0.0126995	0.0126995	-2.83698	NOT
MSTRG.9769.1	0.973295	3.14345	2.61088	0.0127147	0.0127147	-2.96959	NOT
XM_005691313.3	-1.03212	0.421367	-2.61081	0.0127166	0.0127166	-2.83833	DOWN
XM_018060766.1	0.754047	2.13064	2.61035	0.0127313	0.0127313	-2.88477	NOT
XM_013969760.2	-0.62648	3.5248	-2.61021	0.0127357	0.0127357	-2.95837	NOT
XM_018065708.1	-0.668963	1.4616	-2.60969	0.012752	0.012752	-2.85361	NOT
XM_018053750.1	0.405839	2.69245	2.60931	0.0127643	0.0127643	-2.92661	NOT
MSTRG.5775.15	-1.25687	0.0521981	-2.60839	0.0127935	0.0127935	-2.84813	DOWN
XM_018059034.1	-0.537299	4.58759	-2.60805	0.0128042	0.0128042	-3.0434	NOT
XM_005693416.3	-0.505146	1.10235	-2.60649	0.0128538	0.0128538	-2.85499	NOT
XM_018046019.1	-0.473387	2.97837	-2.60573	0.0128781	0.0128781	-2.93277	NOT
MSTRG.2963.4	0.947382	0.615785	2.60498	0.012902	0.012902	-2.85042	NOT
XM_018043874.1	0.684148	2.86007	2.60489	0.0129051	0.0129051	-2.95717	NOT
MSTRG.7869.1	0.350675	5.65907	2.6038	0.0129399	0.0129399	-3.07218	NOT
XM_018058635.1	1.05126	-0.41358	2.60333	0.012955	0.012955	-2.85548	UP
MSTRG.1772.9	1.00933	0.574047	2.60318	0.0129599	0.0129599	-2.85252	UP
XR_001918081.1	-1.08227	1.18139	-2.60299	0.0129658	0.0129658	-2.85518	DOWN
XM_018065355.1	0.393201	3.54891	2.60225	0.0129899	0.0129899	-3.02157	NOT
XM_018058547.1	-1.2675	0.145169	-2.60222	0.0129907	0.0129907	-2.85936	DOWN
XM_013968589.2	0.951543	1.54095	2.60202	0.0129972	0.0129972	-2.88723	NOT
XM_005696337.2	0.564626	5.86016	2.60176	0.0130054	0.0130054	-3.08487	NOT
MSTRG.16006.1	0.675334	1.5864	2.6012	0.0130235	0.0130235	-2.89213	NOT
XM_018064822.1	1.60834	0.100223	2.60087	0.0130344	0.0130344	-2.85719	UP
XM_018067010.1	0.766204	1.94925	2.59991	0.0130653	0.0130653	-2.91669	NOT
XM_018060525.1	-0.353743	4.87696	-2.59985	0.0130674	0.0130674	-3.06652	NOT
MSTRG.12149.7	-1.32488	1.12594	-2.59915	0.0130899	0.0130899	-2.87259	DOWN
MSTRG.10948.3	0.741888	1.92915	2.59861	0.0131073	0.0131073	-2.92637	NOT
MSTRG.2369.4	0.772987	2.67135	2.59843	0.0131135	0.0131135	-2.98359	NOT
XM_005692298.3	-0.406287	7.57185	-2.59822	0.0131201	0.0131201	-3.10369	NOT
XM_005697791.2	-0.445901	4.57004	-2.59765	0.0131385	0.0131385	-3.06499	NOT
XM_018062792.1	0.669288	1.66739	2.59734	0.0131487	0.0131487	-2.90576	NOT
NM_001285670.1	0.632663	1.87415	2.59684	0.0131651	0.0131651	-2.90014	NOT
MSTRG.13680.3	0.985582	0.848932	2.59546	0.01321	0.01321	-2.888	NOT
XM_018062662.1	-0.459902	5.52359	-2.59528	0.0132161	0.0132161	-3.08928	NOT
MSTRG.2123.4	-1.73349	-0.724887	-2.59525	0.013217	0.013217	-2.87203	DOWN
MSTRG.17179.5	-0.883484	0.952776	-2.59285	0.0132958	0.0132958	-2.87418	NOT
XM_018038996.1	-1.2882	0.417067	-2.59163	0.0133359	0.0133359	-2.87921	DOWN
XM_018056011.1	1.01535	0.0515257	2.59161	0.0133366	0.0133366	-2.87668	UP
XM_005696752.3	-2.22274	1.58255	-2.59112	0.0133526	0.0133526	-2.88201	DOWN
MSTRG.16752.2	1.04867	-0.216928	2.59101	0.0133563	0.0133563	-2.87556	UP
MSTRG.13495.1	0.581194	0.813524	2.59026	0.0133812	0.0133812	-2.88118	NOT
MSTRG.750.1	0.554434	2.08644	2.58982	0.0133957	0.0133957	-2.92717	NOT
MSTRG.8211.2	1.41582	0.174127	2.5884	0.013443	0.013443	-2.88418	UP
XR_001919387.1	1.23159	4.46231	2.58824	0.0134481	0.0134481	-3.08857	UP
XM_018043163.1	1.43131	-0.201882	2.58724	0.0134815	0.0134815	-2.88258	UP
MSTRG.16995.1	-1.80788	0.106752	-2.58709	0.0134865	0.0134865	-2.88292	DOWN
XM_005679109.3	-0.38731	5.59265	-2.58657	0.0135039	0.0135039	-3.10524	NOT
MSTRG.5584.1	0.588036	1.43556	2.58619	0.0135166	0.0135166	-2.89867	NOT
MSTRG.9226.2	0.766048	1.04563	2.58554	0.0135381	0.0135381	-2.92388	NOT
XR_001297535.2	0.657915	6.44229	2.58533	0.0135454	0.0135454	-3.12343	NOT
MSTRG.4936.3	-2.4624	0.271791	-2.58512	0.0135523	0.0135523	-2.88686	DOWN
XM_018056722.1	0.763946	1.99413	2.58458	0.0135705	0.0135705	-2.9643	NOT
MSTRG.5090.1	0.58875	3.05151	2.58456	0.0135711	0.0135711	-3.0225	NOT
XM_018056175.1	1.12814	0.697748	2.58346	0.0136079	0.0136079	-2.94186	UP
XM_005676268.3	-0.61936	4.17839	-2.58333	0.0136122	0.0136122	-3.05954	NOT
XM_018060182.1	0.644913	1.44382	2.58287	0.0136279	0.0136279	-2.95051	NOT
XM_005700685.3	0.383214	3.08805	2.58122	0.0136835	0.0136835	-3.0108	NOT
XM_018057657.1	-1.02099	0.158748	-2.58096	0.0136922	0.0136922	-2.89503	DOWN
XM_005675069.2	-1.2165	0.199446	-2.57923	0.0137509	0.0137509	-2.89778	DOWN
XM_018057938.1	-1.1355	3.1646	-2.57741	0.0138125	0.0138125	-2.98621	DOWN
XM_005685496.3	-1.14013	0.322579	-2.57678	0.0138342	0.0138342	-2.90701	DOWN
XM_018056608.1	0.968461	0.361671	2.57631	0.0138501	0.0138501	-2.90897	NOT
XM_005679509.3	-0.967553	0.752909	-2.57599	0.0138613	0.0138613	-2.90383	NOT
XM_018053041.1	0.377598	4.60524	2.57508	0.0138922	0.0138922	-3.11887	NOT
MSTRG.16974.1	1.14279	2.87453	2.57506	0.0138929	0.0138929	-3.02548	UP
XM_018047658.1	1.11119	2.51095	2.57449	0.0139124	0.0139124	-3.02321	UP
MSTRG.3499.1	1.26586	0.285733	2.57328	0.0139541	0.0139541	-2.91171	UP
XM_018040789.1	-0.780393	1.00053	-2.5732	0.0139569	0.0139569	-2.91135	NOT
XM_018066232.1	-0.588246	3.13241	-2.57281	0.0139704	0.0139704	-3.00805	NOT
XM_018042040.1	-0.815541	4.67736	-2.57229	0.013988	0.013988	-3.12654	NOT
XM_013970630.2	1.21452	1.0159	2.57131	0.0140219	0.0140219	-2.94409	UP
XM_018048548.1	-0.565678	6.11388	-2.57092	0.0140355	0.0140355	-3.14308	NOT
XM_018064892.1	-1.11685	1.78645	-2.5709	0.0140362	0.0140362	-2.93019	DOWN
XM_018041964.1	0.729541	2.80743	2.56986	0.0140721	0.0140721	-3.01829	NOT
MSTRG.3800.5	-1.44963	-0.393608	-2.56891	0.0141051	0.0141051	-2.92266	DOWN
MSTRG.7327.5	1.16205	0.593691	2.56818	0.0141303	0.0141303	-2.9722	UP
XM_005693463.3	-0.306771	5.74997	-2.56777	0.0141449	0.0141449	-3.15045	NOT
XM_018052698.1	0.811117	0.275305	2.5677	0.0141473	0.0141473	-2.91951	NOT
MSTRG.12574.3	-1.24807	0.222822	-2.56767	0.0141483	0.0141483	-2.91945	DOWN
XM_018041949.1	0.334031	2.46153	2.56693	0.0141739	0.0141739	-2.98887	NOT
XM_018054565.1	0.537837	5.96553	2.56683	0.0141774	0.0141774	-3.1582	NOT
XM_018058342.1	1.3211	-0.259218	2.56589	0.0142105	0.0142105	-2.92266	UP
XM_018060016.1	0.83251	3.86525	2.56516	0.014236	0.014236	-3.1216	NOT
MSTRG.4626.4	0.590052	-0.928397	2.5651	0.0142379	0.0142379	-2.93278	NOT
XR_001296499.2	1.28813	3.28788	2.56497	0.0142426	0.0142426	-3.08488	UP
XM_018055922.1	1.21592	2.57959	2.56419	0.0142697	0.0142697	-3.05973	UP
XM_018065397.1	0.281644	3.79186	2.56272	0.0143214	0.0143214	-3.10807	NOT
MSTRG.16091.1	0.329416	2.55576	2.5623	0.0143364	0.0143364	-3.013	NOT
XM_018065701.1	-0.607885	3.42561	-2.56189	0.0143508	0.0143508	-3.04406	NOT
XM_018056236.1	-0.478017	6.64585	-2.56085	0.0143875	0.0143875	-3.1723	NOT
XM_013975109.2	0.822371	1.90067	2.56069	0.0143933	0.0143933	-3.00504	NOT
XM_018039000.1	2.00952	2.68651	2.55963	0.0144308	0.0144308	-3.08799	UP
XM_018043925.1	1.17453	3.77768	2.55954	0.0144339	0.0144339	-3.13135	UP
XM_005690378.3	1.36273	2.17897	2.55735	0.0145119	0.0145119	-2.98028	UP
MSTRG.13415.5	1.13328	0.934578	2.55648	0.014543	0.014543	-3.00934	UP
XM_018051208.1	0.47703	3.06882	2.5557	0.0145709	0.0145709	-3.0771	NOT
MSTRG.3463.4	3.63779	0.46751	2.55565	0.0145727	0.0145727	-3.0131	UP
MSTRG.13704.2	-1.71535	4.41922	-2.5554	0.0145815	0.0145815	-3.14299	DOWN
MSTRG.11984.11	0.590156	1.03599	2.55451	0.0146132	0.0146132	-2.96501	NOT
XM_018057598.1	0.744698	2.63332	2.55327	0.0146581	0.0146581	-3.06023	NOT
MSTRG.10487.5	-0.995173	0.197049	-2.55305	0.014666	0.014666	-2.94644	NOT
MSTRG.9849.1	-0.878713	3.61939	-2.55189	0.0147078	0.0147078	-3.12312	NOT
XM_005696632.3	-0.364999	2.49266	-2.55182	0.0147101	0.0147101	-3.01735	NOT
XM_018066898.1	-0.378239	6.80768	-2.55093	0.0147425	0.0147425	-3.19598	NOT
XM_018054923.1	-0.332681	3.41489	-2.55082	0.0147462	0.0147462	-3.08947	NOT
XM_018047629.1	-0.700255	1.59735	-2.55073	0.0147497	0.0147497	-2.98323	NOT
MSTRG.7544.1	0.911147	0.693621	2.55062	0.0147535	0.0147535	-2.97267	NOT
MSTRG.3946.1	1.12738	-0.17726	2.55006	0.0147739	0.0147739	-2.95197	UP
MSTRG.3463.6	1.24923	0.895371	2.54926	0.0148029	0.0148029	-3.0019	UP
XM_018050518.1	1.70567	4.40142	2.54874	0.0148217	0.0148217	-3.17641	UP
MSTRG.13411.9	1.12359	-0.120315	2.54747	0.014868	0.014868	-2.95682	UP
XM_018057448.1	0.350629	2.0126	2.54632	0.01491	0.01491	-3.01719	NOT
MSTRG.16763.32	1.73655	0.397774	2.546	0.0149217	0.0149217	-2.96431	UP
XM_013976677.2	-0.894609	-0.0378685	-2.54483	0.0149645	0.0149645	-2.96628	NOT
XM_005693519.2	-0.619102	7.46486	-2.54373	0.0150048	0.0150048	-3.21502	NOT
XM_018051380.1	-0.646437	1.48381	-2.54254	0.0150485	0.0150485	-2.98078	NOT
MSTRG.6437.1	0.606862	0.974742	2.54091	0.0151087	0.0151087	-2.97745	NOT
XM_018059234.1	0.833159	1.37261	2.54086	0.0151105	0.0151105	-3.01518	NOT
XM_018052479.1	0.873604	0.132569	2.54048	0.0151245	0.0151245	-2.97326	NOT
XM_018049430.1	0.691121	2.14327	2.54029	0.0151318	0.0151318	-3.03409	NOT
XM_018048076.1	1.29047	1.01025	2.54013	0.0151378	0.0151378	-2.97886	UP
XM_005686796.3	-1.38326	0.383297	-2.54008	0.0151394	0.0151394	-2.97379	DOWN
XM_018057981.1	1.05351	0.199831	2.53978	0.0151505	0.0151505	-2.97149	UP
XM_018043622.1	0.46145	0.864222	2.53939	0.015165	0.015165	-2.97886	NOT
XM_005677920.3	-0.662585	4.34588	-2.53938	0.0151655	0.0151655	-3.15452	NOT
MSTRG.768.1	0.540536	3.41194	2.5391	0.0151759	0.0151759	-3.15398	NOT
MSTRG.8587.2	1.13696	0.345316	2.5375	0.0152354	0.0152354	-3.00803	UP
XM_005694015.2	-0.475467	3.44129	-2.53715	0.0152484	0.0152484	-3.12694	NOT
MSTRG.16763.15	1.41806	-0.20521	2.53681	0.0152612	0.0152612	-2.97674	UP
XM_005689986.2	-0.517433	10.3244	-2.53649	0.0152732	0.0152732	-3.25111	NOT
XM_005692438.3	-0.575446	0.877302	-2.53522	0.0153205	0.0153205	-2.99022	NOT
XM_018049826.1	0.56932	4.68894	2.53513	0.0153241	0.0153241	-3.20398	NOT
XM_005686793.3	-0.349699	5.61834	-2.53465	0.0153421	0.0153421	-3.2185	NOT
MSTRG.7821.1	-0.919107	0.787998	-2.53398	0.0153671	0.0153671	-2.98371	NOT
MSTRG.261.1	1.14427	-0.00962407	2.53324	0.015395	0.015395	-3.00607	UP
XM_018046081.1	0.799854	4.05873	2.53321	0.0153961	0.0153961	-3.18693	NOT
XM_018044779.1	-0.411103	6.4745	-2.53299	0.0154045	0.0154045	-3.236	NOT
MSTRG.6002.8	0.934346	1.42837	2.53277	0.0154125	0.0154125	-3.02182	NOT
XM_005680968.3	-0.444039	8.01084	-2.53205	0.0154397	0.0154397	-3.24779	NOT
XM_018057871.1	0.875826	1.73827	2.5318	0.0154493	0.0154493	-3.03204	NOT
XM_013965857.2	0.968072	1.20091	2.53098	0.0154803	0.0154803	-3.00929	NOT
MSTRG.2363.1	1.44349	1.51596	2.53093	0.0154822	0.0154822	-3.01282	UP
XM_018040957.1	-1.11844	0.70212	-2.53026	0.0155074	0.0155074	-2.98911	DOWN
MSTRG.264.1	0.581509	1.54997	2.52857	0.0155714	0.0155714	-3.04199	NOT
MSTRG.15228.8	0.929935	0.484745	2.52838	0.0155788	0.0155788	-2.99461	NOT
XM_018066600.1	-1.50779	0.231096	-2.52801	0.015593	0.015593	-2.99655	DOWN
XM_018063837.1	0.392171	2.05846	2.52787	0.0155983	0.0155983	-3.05972	NOT
XM_018048819.1	1.27906	2.31017	2.52762	0.0156077	0.0156077	-3.0628	UP
XM_005688305.3	-0.710913	2.06332	-2.52753	0.015611	0.015611	-3.05884	NOT
XM_018051888.1	-0.58207	3.42961	-2.52627	0.0156593	0.0156593	-3.11864	NOT
MSTRG.13880.8	0.66052	1.97234	2.52516	0.0157019	0.0157019	-3.0662	NOT
XM_005695833.3	0.876245	0.839905	2.525	0.015708	0.015708	-3.02209	NOT
MSTRG.17115.3	-0.968423	1.88551	-2.52473	0.0157184	0.0157184	-3.05379	NOT
MSTRG.14510.1	1.27279	2.71651	2.52465	0.0157212	0.0157212	-3.11896	UP
MSTRG.10068.4	0.725562	2.58159	2.5218	0.015831	0.015831	-3.10944	NOT
XM_018048036.1	1.22006	0.115165	2.52164	0.0158371	0.0158371	-3.00765	UP
MSTRG.1634.3	0.813159	2.07826	2.52153	0.0158413	0.0158413	-3.09912	NOT
XM_018053892.1	1.03127	0.976328	2.52121	0.0158539	0.0158539	-3.06088	UP
XM_005677386.3	-1.42029	1.5818	-2.52065	0.0158754	0.0158754	-3.06903	DOWN
XM_018042497.1	-0.786965	5.73403	-2.52035	0.0158869	0.0158869	-3.25116	NOT
MSTRG.13207.6	0.98508	1.92076	2.5197	0.015912	0.015912	-3.08266	NOT
XM_018057988.1	1.04001	0.0779867	2.51931	0.0159271	0.0159271	-3.00953	UP
XM_018054273.1	1.08575	3.06206	2.51829	0.0159668	0.0159668	-3.17802	UP
XM_005692112.3	-0.989262	0.710363	-2.5177	0.0159899	0.0159899	-3.02346	NOT
XM_018039367.1	0.858099	0.518891	2.51735	0.0160034	0.0160034	-3.02722	NOT
XM_018039788.1	-0.534554	3.83348	-2.51617	0.0160494	0.0160494	-3.18932	NOT
XM_005678522.2	0.66909	4.28046	2.51605	0.0160543	0.0160543	-3.23158	NOT
XM_018043265.1	0.732335	5.73757	2.51575	0.0160659	0.0160659	-3.25779	NOT
XM_018055772.1	1.23805	-0.0412576	2.51499	0.0160957	0.0160957	-3.01907	UP
XM_005675483.3	0.917568	0.357842	2.51498	0.0160963	0.0160963	-3.01725	NOT
XM_005680583.3	-0.317836	3.64933	-2.51483	0.016102	0.016102	-3.17853	NOT
MSTRG.2989.1	1.26678	0.63905	2.51466	0.0161087	0.0161087	-3.0209	UP
XM_005699742.3	0.445668	5.21232	2.51395	0.0161365	0.0161365	-3.25531	NOT
XM_005700681.3	-0.64261	4.62591	-2.5127	0.0161857	0.0161857	-3.23296	NOT
XM_013963638.2	-1.0692	-0.00417852	-2.51195	0.0162153	0.0162153	-3.02316	DOWN
XM_018047882.1	0.805755	3.90847	2.51132	0.01624	0.01624	-3.22207	NOT
XM_005676282.3	1.09548	1.71609	2.51121	0.0162447	0.0162447	-3.10916	UP
XM_018047672.1	0.720696	1.86743	2.5111	0.0162488	0.0162488	-3.08687	NOT
MSTRG.13503.10	0.971029	0.104166	2.50835	0.0163578	0.0163578	-3.02869	NOT
XM_018048080.1	0.701567	2.69718	2.50825	0.016362	0.016362	-3.14771	NOT
XM_018060719.1	-0.419818	3.93182	-2.50775	0.016382	0.016382	-3.21509	NOT
MSTRG.12703.2	1.61873	2.87383	2.50728	0.0164005	0.0164005	-3.18367	UP
XM_018054203.1	-1.57384	0.733839	-2.50699	0.0164119	0.0164119	-3.03125	DOWN
XM_005698497.3	-0.642663	2.45768	-2.50692	0.0164147	0.0164147	-3.09414	NOT
XM_018047230.1	-0.681472	2.39412	-2.50675	0.0164217	0.0164217	-3.10535	NOT
XM_018052231.1	1.12499	0.244492	2.50475	0.0165017	0.0165017	-3.0397	UP
XM_018041073.1	0.950037	2.35124	2.50422	0.0165229	0.0165229	-3.14525	NOT
MSTRG.14395.1	0.490859	4.30264	2.50415	0.0165257	0.0165257	-3.26288	NOT
XR_001918902.1	0.952746	0.583742	2.5039	0.0165359	0.0165359	-3.05082	NOT
XM_005682563.3	-0.326606	3.10801	-2.50385	0.0165379	0.0165379	-3.17165	NOT
XM_018043634.1	0.735252	0.33644	2.50326	0.0165616	0.0165616	-3.0472	NOT
MSTRG.13922.1	-2.19244	0.250296	-2.50315	0.0165658	0.0165658	-3.03838	DOWN
XM_018066183.1	0.723683	1.77938	2.50245	0.016594	0.016594	-3.08914	NOT
XM_018039243.1	0.716461	4.13754	2.50198	0.0166129	0.0166129	-3.25541	NOT
XM_013972752.2	-0.523893	3.80446	-2.50088	0.0166574	0.0166574	-3.2005	NOT
XM_013963731.2	-0.622471	2.97966	-2.49956	0.0167108	0.0167108	-3.13999	NOT
XM_018048682.1	1.12263	-0.370892	2.49955	0.0167114	0.0167114	-3.04467	UP
XM_018060608.1	-0.596078	5.94795	-2.49929	0.0167217	0.0167217	-3.29702	NOT
XM_018052504.1	1.01734	1.31952	2.4991	0.0167296	0.0167296	-3.08171	UP
XM_018055535.1	-1.31828	0.167663	-2.49783	0.016781	0.016781	-3.04759	DOWN
XM_018050151.1	0.834068	0.559241	2.49775	0.0167843	0.0167843	-3.05528	NOT
XM_018064229.1	0.937265	0.263748	2.49774	0.0167849	0.0167849	-3.04834	NOT
XM_018058720.1	1.04302	-0.247165	2.49609	0.0168523	0.0168523	-3.0534	UP
XM_005683309.3	-0.809315	2.61554	-2.4959	0.0168597	0.0168597	-3.13437	NOT
MSTRG.7412.1	0.541745	4.03503	2.49567	0.0168692	0.0168692	-3.27412	NOT
MSTRG.15913.4	0.665347	1.90627	2.49519	0.016889	0.016889	-3.11386	NOT
XR_001917721.1	0.645035	2.04717	2.49366	0.0169517	0.0169517	-3.12848	NOT
XM_013973892.2	-0.747214	1.81112	-2.49351	0.016958	0.016958	-3.08731	NOT
MSTRG.5967.1	-1.23908	0.431569	-2.4931	0.0169745	0.0169745	-3.06048	DOWN
MSTRG.13119.5	1.16303	1.3984	2.49295	0.0169811	0.0169811	-3.08473	UP
XM_018065387.1	0.727503	0.788669	2.49226	0.0170091	0.0170091	-3.06071	NOT
MSTRG.17673.1	1.1237	1.78935	2.4902	0.0170942	0.0170942	-3.13242	UP
XM_013967424.2	0.866136	1.51758	2.48977	0.0171122	0.0171122	-3.1162	NOT
MSTRG.16625.3	-1.38414	1.18767	-2.4885	0.017165	0.017165	-3.07242	DOWN
XM_005690737.3	-0.364919	5.70341	-2.48817	0.0171785	0.0171785	-3.31815	NOT
XM_005696028.3	-0.744852	0.538661	-2.48812	0.0171806	0.0171806	-3.06515	NOT
MSTRG.2393.4	1.066	1.18926	2.48796	0.0171873	0.0171873	-3.12718	UP
MSTRG.12143.1	0.614454	2.46139	2.48794	0.017188	0.017188	-3.24108	NOT
XM_018052126.1	1.0932	0.294724	2.48726	0.0172166	0.0172166	-3.12247	UP
MSTRG.14184.1	-2.30232	3.54482	-2.48663	0.0172429	0.0172429	-3.28019	DOWN
MSTRG.854.1	1.35931	0.219271	2.48659	0.0172445	0.0172445	-3.08337	UP
XM_018038601.1	0.654097	1.48567	2.48654	0.0172464	0.0172464	-3.1208	NOT
MSTRG.3034.1	-0.475577	2.5507	-2.48643	0.0172513	0.0172513	-3.16079	NOT
XM_018058216.1	0.595333	1.48356	2.48619	0.0172613	0.0172613	-3.09943	NOT
MSTRG.10650.1	-1.16229	-0.138359	-2.48491	0.0173145	0.0173145	-3.07291	DOWN
MSTRG.16804.1	0.693534	0.967961	2.48478	0.0173201	0.0173201	-3.09397	NOT
MSTRG.7364.4	1.07158	0.491223	2.48459	0.0173279	0.0173279	-3.07603	UP
XM_018047995.1	0.523164	2.36806	2.48362	0.0173688	0.0173688	-3.18203	NOT
XM_018060606.1	1.17078	0.7569	2.48358	0.0173705	0.0173705	-3.08844	UP
XM_018050357.1	-0.968969	-0.00111466	-2.48335	0.01738	0.01738	-3.07535	NOT
MSTRG.14163.1	-0.695934	2.28181	-2.48317	0.0173878	0.0173878	-3.12516	NOT
XM_018055848.1	0.648211	3.47246	2.483	0.017395	0.017395	-3.2431	NOT
XM_018062464.1	0.472358	3.72355	2.48294	0.0173973	0.0173973	-3.26995	NOT
MSTRG.4408.3	0.890225	0.491436	2.48275	0.0174055	0.0174055	-3.08143	NOT
XM_018038574.1	1.29166	1.19503	2.48158	0.0174546	0.0174546	-3.11571	UP
XM_005693260.3	0.30725	4.40688	2.48112	0.0174742	0.0174742	-3.30961	NOT
XM_005679558.3	0.950852	0.470825	2.48093	0.0174821	0.0174821	-3.08356	NOT
XM_018061080.1	0.778131	2.74376	2.48041	0.0175039	0.0175039	-3.18626	NOT
XM_005700145.2	-0.903061	1.45413	-2.47991	0.0175252	0.0175252	-3.09955	NOT
MSTRG.5396.1	0.788896	2.37621	2.47983	0.0175288	0.0175288	-3.18893	NOT
XM_018065363.1	0.69306	0.771601	2.47971	0.0175336	0.0175336	-3.09005	NOT
XM_018048816.1	1.19596	-0.000833101	2.47968	0.0175351	0.0175351	-3.08549	UP
MSTRG.7713.7	1.02947	2.91216	2.47836	0.0175911	0.0175911	-3.26819	UP
XM_018043449.1	0.750292	3.77018	2.47797	0.0176075	0.0176075	-3.29675	NOT
MSTRG.547.2	-2.02814	0.135593	-2.47641	0.0176741	0.0176741	-3.08624	DOWN
XR_001917628.1	0.45478	3.07913	2.47637	0.0176755	0.0176755	-3.23444	NOT
XM_018058510.1	-1.09331	0.854527	-2.47588	0.0176968	0.0176968	-3.08993	DOWN
XM_018039561.1	-0.30157	5.66878	-2.47569	0.0177046	0.0177046	-3.34288	NOT
XM_018045063.1	-0.29545	5.77869	-2.47514	0.0177283	0.0177283	-3.34373	NOT
XM_005675123.3	-0.704333	2.91809	-2.47466	0.0177487	0.0177487	-3.19185	NOT
XM_018041654.1	-1.0805	-0.717499	-2.47412	0.0177721	0.0177721	-3.09268	DOWN
XR_001296011.2	-1.46835	-0.870572	-2.47347	0.0177998	0.0177998	-3.09266	DOWN
XM_018065666.1	-1.10831	-0.204141	-2.47339	0.0178033	0.0178033	-3.09388	DOWN
XM_018065118.1	0.975608	0.424264	2.47298	0.0178209	0.0178209	-3.10503	NOT
XM_018056121.1	0.741988	0.54031	2.47284	0.0178269	0.0178269	-3.10435	NOT
XM_005694985.3	-0.824254	0.188645	-2.47282	0.0178278	0.0178278	-3.09312	NOT
XM_018047707.1	1.43966	1.85197	2.47235	0.0178482	0.0178482	-3.20522	UP
XM_018064566.1	-1.18265	-0.288109	-2.47064	0.0179217	0.0179217	-3.09852	DOWN
XM_018057374.1	-0.384629	3.02593	-2.47037	0.0179334	0.0179334	-3.22616	NOT
MSTRG.5977.1	1.04923	1.17907	2.47025	0.0179388	0.0179388	-3.12447	UP
XM_018061769.1	-0.908524	1.02956	-2.47015	0.0179429	0.0179429	-3.09999	NOT
XM_018061316.1	0.464811	1.08786	2.4695	0.0179713	0.0179713	-3.12376	NOT
XM_018038788.1	-0.724499	3.36457	-2.46866	0.0180078	0.0180078	-3.28699	NOT
MSTRG.3214.1	0.828632	1.31171	2.46847	0.0180157	0.0180157	-3.16599	NOT
XM_018040428.1	0.722972	0.319431	2.46845	0.0180167	0.0180167	-3.14765	NOT
MSTRG.7711.2	0.532504	3.33748	2.46821	0.0180272	0.0180272	-3.29298	NOT
MSTRG.1195.2	-2.22795	-0.0322402	-2.46767	0.0180505	0.0180505	-3.10816	DOWN
MSTRG.13879.4	-0.929743	-0.378487	-2.4672	0.0180712	0.0180712	-3.10462	NOT
XM_005687722.3	-0.88358	1.34096	-2.46682	0.0180876	0.0180876	-3.12616	NOT
XM_018064441.1	0.674994	0.633763	2.4663	0.0181102	0.0181102	-3.11481	NOT
MSTRG.4233.2	-1.31394	0.262315	-2.46485	0.0181734	0.0181734	-3.1216	DOWN
XM_018048505.1	0.581839	3.17382	2.46383	0.0182184	0.0182184	-3.27379	NOT
MSTRG.8302.4	-1.34841	0.528059	-2.46359	0.0182289	0.0182289	-3.12886	DOWN
MSTRG.8024.2	1.00913	0.387761	2.46299	0.0182552	0.0182552	-3.11074	UP
MSTRG.5423.1	1.23766	2.7562	2.46214	0.0182926	0.0182926	-3.25586	UP
XM_018064584.1	0.693157	4.21778	2.4618	0.0183077	0.0183077	-3.35276	NOT
XR_001918420.1	1.46083	0.310734	2.46142	0.0183242	0.0183242	-3.12725	UP
XM_018056084.1	0.313937	3.06879	2.4609	0.0183473	0.0183473	-3.26978	NOT
MSTRG.6899.2	-1.18059	-0.660559	-2.46084	0.0183498	0.0183498	-3.11479	DOWN
XM_018052198.1	-0.681253	2.06785	-2.46064	0.0183588	0.0183588	-3.16937	NOT
MSTRG.3456.1	0.698002	2.61408	2.4606	0.0183605	0.0183605	-3.31162	NOT
MSTRG.857.1	0.699505	0.88712	2.4601	0.0183824	0.0183824	-3.13097	NOT
XM_005679851.3	1.42605	1.63139	2.46001	0.0183865	0.0183865	-3.15042	UP
XM_018042292.1	0.875288	0.628044	2.45973	0.0183988	0.0183988	-3.12924	NOT
MSTRG.6104.12	1.38473	0.757083	2.45963	0.0184033	0.0184033	-3.1484	UP
XM_005695727.2	-0.612376	1.41517	-2.45932	0.0184171	0.0184171	-3.13115	NOT
XM_005694094.3	-1.12192	0.311975	-2.45903	0.0184298	0.0184298	-3.11727	DOWN
XM_005683173.3	-1.10008	4.9071	-2.45774	0.0184872	0.0184872	-3.35743	DOWN
MSTRG.9617.3	-1.48576	-0.771741	-2.45768	0.0184899	0.0184899	-3.12045	DOWN
MSTRG.9791.1	0.954948	0.85487	2.45754	0.0184962	0.0184962	-3.13733	NOT
XM_018058614.1	0.489712	2.3412	2.45737	0.0185038	0.0185038	-3.2007	NOT
MSTRG.12938.1	0.446994	1.64956	2.45733	0.0185055	0.0185055	-3.18517	NOT
XM_018064649.1	-1.01595	-0.660194	-2.45604	0.0185632	0.0185632	-3.12439	DOWN
XM_018055996.1	0.787613	0.438514	2.45594	0.0185672	0.0185672	-3.13003	NOT
MSTRG.11569.8	0.654388	3.08172	2.45561	0.0185822	0.0185822	-3.27021	NOT
XM_018049863.1	0.539178	2.37613	2.45544	0.0185897	0.0185897	-3.22157	NOT
MSTRG.13406.1	0.514042	3.10602	2.45484	0.0186166	0.0186166	-3.29748	NOT
MSTRG.16625.2	0.889402	2.32562	2.45291	0.0187033	0.0187033	-3.20052	NOT
XM_018038368.1	-0.870824	2.02625	-2.45242	0.0187251	0.0187251	-3.17334	NOT
MSTRG.16444.5	0.982664	0.0361098	2.44971	0.0188472	0.0188472	-3.13953	NOT
XM_018065097.1	0.995434	2.09894	2.44855	0.0189001	0.0189001	-3.26723	NOT
XM_018041882.1	1.69392	0.273321	2.44744	0.0189504	0.0189504	-3.14307	UP
XM_005693236.3	-1.00371	2.45609	-2.44742	0.0189513	0.0189513	-3.22896	DOWN
XM_018038296.1	0.615672	2.44602	2.4463	0.0190024	0.0190024	-3.25198	NOT
XM_005691420.3	-0.417846	3.25068	-2.4461	0.0190113	0.0190113	-3.30481	NOT
XM_018058185.1	-0.488988	2.54261	-2.4459	0.0190206	0.0190206	-3.22549	NOT
XM_013975275.2	0.366787	2.73139	2.44584	0.0190231	0.0190231	-3.2745	NOT
XM_005694755.2	0.797464	1.84021	2.44562	0.0190333	0.0190333	-3.21924	NOT
XM_005692647.2	-0.327497	5.7384	-2.44543	0.019042	0.019042	-3.40271	NOT
XM_018041827.1	1.29833	-0.144981	2.44508	0.0190581	0.0190581	-3.14957	UP
MSTRG.6874.9	-0.919646	0.47423	-2.44495	0.0190639	0.0190639	-3.14279	NOT
XM_018065661.1	-0.955082	0.795683	-2.44472	0.0190745	0.0190745	-3.14382	NOT
MSTRG.16647.11	-1.62652	-0.615284	-2.44446	0.0190863	0.0190863	-3.14325	DOWN
XM_018038510.1	-1.22539	3.29436	-2.44394	0.01911	0.01911	-3.3552	DOWN
XM_005676305.3	-0.408417	5.13921	-2.44353	0.0191289	0.0191289	-3.3976	NOT
XM_018059747.1	0.846249	1.61451	2.4435	0.0191303	0.0191303	-3.19329	NOT
XM_018066910.1	0.628219	3.61784	2.44287	0.0191592	0.0191592	-3.36071	NOT
XM_018052241.1	1.31223	0.513746	2.4428	0.0191622	0.0191622	-3.14986	UP
XM_005696395.3	0.807613	1.04004	2.44259	0.0191722	0.0191722	-3.17092	NOT
MSTRG.11050.1	0.577176	2.37022	2.44201	0.0191987	0.0191987	-3.25685	NOT
XM_018046831.1	0.427303	3.36084	2.44103	0.0192436	0.0192436	-3.34623	NOT
XM_018066968.1	0.391198	3.90211	2.44074	0.0192574	0.0192574	-3.36308	NOT
XM_018052794.1	-0.414934	2.55514	-2.43974	0.0193034	0.0193034	-3.26225	NOT
XM_018055389.1	-0.446148	9.9649	-2.43937	0.0193204	0.0193204	-3.45174	NOT
XM_018062531.1	-0.469321	1.88203	-2.43908	0.0193337	0.0193337	-3.20704	NOT
XM_018044827.1	0.866769	-0.131873	2.43878	0.0193478	0.0193478	-3.15386	NOT
MSTRG.15011.1	0.664705	2.96213	2.43875	0.0193491	0.0193491	-3.3142	NOT
MSTRG.10661.1	0.502929	1.32445	2.43858	0.0193568	0.0193568	-3.18417	NOT
XM_005679404.3	-0.572265	3.11175	-2.43842	0.0193647	0.0193647	-3.30954	NOT
XM_018066039.1	1.19848	1.70078	2.43835	0.0193676	0.0193676	-3.23535	UP
XM_018046815.1	0.620633	2.17285	2.43735	0.0194142	0.0194142	-3.24401	NOT
XM_005679307.3	1.05679	0.442141	2.43719	0.0194214	0.0194214	-3.15696	UP
XM_018056967.1	0.342894	1.81658	2.43665	0.0194465	0.0194465	-3.22139	NOT
MSTRG.2609.2	1.04947	0.336816	2.4365	0.0194539	0.0194539	-3.15802	UP
XM_018065160.1	1.65968	1.15401	2.43548	0.0195014	0.0195014	-3.20986	UP
XM_018038538.1	-1.18556	1.2514	-2.43545	0.0195024	0.0195024	-3.18384	DOWN
XR_310209.3	0.932715	3.10295	2.43366	0.0195863	0.0195863	-3.37722	NOT
XM_005690127.3	-0.56277	3.89536	-2.43329	0.0196039	0.0196039	-3.38876	NOT
XM_018054970.1	0.369427	3.22564	2.43325	0.0196054	0.0196054	-3.33928	NOT
XR_001297172.2	-1.39556	0.903321	-2.43204	0.0196623	0.0196623	-3.16543	DOWN
XM_018042373.1	0.977145	0.639618	2.4312	0.0197021	0.0197021	-3.1852	NOT
XM_018054589.1	1.32576	0.294596	2.43005	0.019756	0.019756	-3.178	UP
XM_018062242.1	0.600322	3.6079	2.42995	0.019761	0.019761	-3.34982	NOT
XR_001296211.2	1.014	1.05223	2.42885	0.0198126	0.0198126	-3.20819	UP
MSTRG.10186.1	-2.16762	0.512275	-2.42757	0.0198737	0.0198737	-3.17501	DOWN
MSTRG.14560.3	-1.11464	-0.212012	-2.42711	0.0198955	0.0198955	-3.17411	DOWN
XM_018051774.1	1.59315	0.0287049	2.4257	0.0199623	0.0199623	-3.19289	UP
MSTRG.2346.1	-1.0486	1.84427	-2.42553	0.0199706	0.0199706	-3.20877	DOWN
XM_018044027.1	1.53567	0.51977	2.42499	0.0199965	0.0199965	-3.23148	UP
XM_018063510.1	-0.706692	0.592669	-2.4248	0.0200054	0.0200054	-3.17835	NOT
XM_018057687.1	-0.573796	4.12369	-2.42479	0.0200058	0.0200058	-3.3921	NOT
MSTRG.13394.5	-1.85448	1.14001	-2.4247	0.0200102	0.0200102	-3.18521	DOWN
XM_005685030.3	1.05019	1.59581	2.42407	0.0200403	0.0200403	-3.2636	UP
XM_018061008.1	-0.788417	2.61962	-2.42383	0.0200519	0.0200519	-3.27091	NOT
XR_001295937.2	-1.88593	-0.35646	-2.42353	0.020066	0.020066	-3.18114	DOWN
XM_018063055.1	0.736381	2.75281	2.42353	0.0200662	0.0200662	-3.32301	NOT
XM_018060921.1	-0.391209	5.43145	-2.42326	0.0200793	0.0200793	-3.44575	NOT
XM_018055439.1	0.251663	4.44401	2.42319	0.0200825	0.0200825	-3.42288	NOT
XM_018058770.1	0.991316	0.0286917	2.42307	0.0200879	0.0200879	-3.18199	NOT
XM_005698044.3	0.599952	1.91821	2.42264	0.020109	0.020109	-3.26417	NOT
MSTRG.14721.20	1.84046	2.21007	2.42109	0.0201835	0.0201835	-3.34406	UP
MSTRG.10513.1	0.442297	2.95001	2.42046	0.0202137	0.0202137	-3.34191	NOT
MSTRG.13709.1	-1.01574	0.723152	-2.42017	0.0202279	0.0202279	-3.18663	DOWN
XM_018043424.1	-0.974922	0.947445	-2.42015	0.0202284	0.0202284	-3.18781	NOT
XM_013974025.2	1.40498	-0.0133029	2.41977	0.0202468	0.0202468	-3.19263	UP
XM_018060745.1	0.496076	1.51229	2.41975	0.020248	0.020248	-3.23275	NOT
XM_005677710.3	-1.41657	1.36722	-2.41947	0.0202616	0.0202616	-3.24744	DOWN
XM_005698995.3	0.921332	0.418323	2.41906	0.0202812	0.0202812	-3.19037	NOT
XM_018040701.1	0.438236	3.2024	2.41883	0.0202924	0.0202924	-3.35065	NOT
MSTRG.17539.1	3.18525	1.30755	2.41844	0.0203115	0.0203115	-3.27132	UP
MSTRG.653.1	1.18663	-0.609544	2.41824	0.0203207	0.0203207	-3.18937	UP
XM_005679309.2	-0.785661	0.531115	-2.41804	0.0203307	0.0203307	-3.19069	NOT
XM_005685826.3	-0.499756	1.33821	-2.41798	0.0203337	0.0203337	-3.21295	NOT
MSTRG.16763.16	1.33727	0.316828	2.41794	0.0203354	0.0203354	-3.19687	UP
XM_005687300.3	-0.318469	4.66371	-2.41627	0.0204164	0.0204164	-3.44538	NOT
MSTRG.11573.1	0.48612	3.15674	2.41602	0.0204288	0.0204288	-3.37951	NOT
MSTRG.12507.1	0.439255	1.64847	2.41593	0.0204329	0.0204329	-3.24397	NOT
XM_018067180.1	-0.903368	0.188273	-2.4156	0.0204493	0.0204493	-3.19426	NOT
MSTRG.17200.8	3.16691	7.6851	2.41504	0.0204763	0.0204763	-3.49328	UP
XM_018040512.1	-1.41393	0.603376	-2.41503	0.0204768	0.0204768	-3.1968	DOWN
XM_005688637.3	0.35694	3.14529	2.41437	0.0205092	0.0205092	-3.38222	NOT
XM_005701732.3	0.422859	1.19216	2.41421	0.0205168	0.0205168	-3.2297	NOT
XM_018065684.1	0.527902	2.51431	2.41392	0.020531	0.020531	-3.3021	NOT
MSTRG.8540.3	1.03781	1.18375	2.41368	0.0205429	0.0205429	-3.29708	UP
MSTRG.8230.14	0.831285	1.60428	2.4132	0.0205666	0.0205666	-3.25677	NOT
MSTRG.653.2	1.12927	-0.418867	2.41312	0.0205704	0.0205704	-3.19834	UP
XM_018053165.1	1.16456	-0.0906476	2.41295	0.0205788	0.0205788	-3.20341	UP
MSTRG.7452.6	-1.7268	-0.462798	-2.41293	0.0205794	0.0205794	-3.19866	DOWN
XM_005696315.3	-1.86684	1.79706	-2.41205	0.0206226	0.0206226	-3.22209	DOWN
MSTRG.17734.1	0.628477	1.35264	2.41174	0.0206382	0.0206382	-3.25707	NOT
XM_005675228.3	0.797812	1.2265	2.41133	0.0206581	0.0206581	-3.24877	NOT
MSTRG.17694.1	0.457887	3.15834	2.41055	0.0206967	0.0206967	-3.37277	NOT
XM_018050127.1	0.340715	5.04027	2.40979	0.020734	0.020734	-3.47128	NOT
XM_005680387.3	-0.440898	1.78713	-2.40944	0.020751	0.020751	-3.25308	NOT
MSTRG.8833.1	2.39224	1.7597	2.40827	0.0208091	0.0208091	-3.3087	UP
MSTRG.14685.2	1.72645	1.8971	2.40805	0.02082	0.02082	-3.31969	UP
MSTRG.12544.1	0.697168	3.21943	2.40791	0.0208271	0.0208271	-3.44899	NOT
MSTRG.4305.3	-1.14597	0.973615	-2.40716	0.020864	0.020864	-3.22072	DOWN
XM_005677703.3	-0.70203	4.42661	-2.40681	0.0208814	0.0208814	-3.46169	NOT
MSTRG.6777.4	0.666456	1.95141	2.40679	0.0208826	0.0208826	-3.28377	NOT
XM_005694595.3	-0.596847	0.551725	-2.40571	0.0209363	0.0209363	-3.21237	NOT
XM_005691015.3	0.31395	5.07516	2.40512	0.0209653	0.0209653	-3.48077	NOT
XM_018060170.1	0.751893	1.52224	2.40496	0.0209737	0.0209737	-3.26697	NOT
XM_005700713.3	-0.556187	1.70272	-2.40491	0.0209759	0.0209759	-3.25779	NOT
XM_018044258.1	-0.691047	2.50897	-2.40473	0.0209852	0.0209852	-3.30611	NOT
MSTRG.6236.1	-1.48496	0.463811	-2.4047	0.0209863	0.0209863	-3.22625	DOWN
XM_018050482.1	1.51099	3.99216	2.40399	0.0210217	0.0210217	-3.46519	UP
MSTRG.7440.3	-2.3666	1.04685	-2.40351	0.0210457	0.0210457	-3.25173	DOWN
MSTRG.3223.1	-0.867298	2.68257	-2.40312	0.0210654	0.0210654	-3.3111	NOT
XM_005675355.3	-0.904888	0.686854	-2.40242	0.0211006	0.0211006	-3.2182	NOT
MSTRG.9241.3	1.02716	1.14634	2.40205	0.0211191	0.0211191	-3.27798	UP
MSTRG.13900.2	0.78639	2.72812	2.40049	0.0211974	0.0211974	-3.37708	NOT
MSTRG.10944.2	1.22292	0.716746	2.39995	0.0212244	0.0212244	-3.2345	UP
XM_018065953.1	0.478166	2.57181	2.39993	0.0212256	0.0212256	-3.32391	NOT
MSTRG.11263.2	-1.24295	1.08496	-2.39907	0.0212688	0.0212688	-3.23192	DOWN
XM_005676779.3	-0.257994	5.06131	-2.39789	0.0213285	0.0213285	-3.49124	NOT
XM_018051135.1	0.73252	3.23079	2.39734	0.0213562	0.0213562	-3.40291	NOT
XM_005677346.1	-0.355887	6.33868	-2.39658	0.0213948	0.0213948	-3.50938	NOT
XM_018053049.1	1.10486	2.2303	2.39626	0.021411	0.021411	-3.31314	UP
XM_005690715.3	0.7168	1.44534	2.39588	0.0214302	0.0214302	-3.29382	NOT
MSTRG.3322.4	-0.802583	6.35995	-2.39585	0.0214322	0.0214322	-3.51227	NOT
XM_005693150.3	-0.46028	3.19121	-2.3957	0.0214396	0.0214396	-3.38486	NOT
XM_005695546.3	1.15066	0.213104	2.39334	0.0215601	0.0215601	-3.27258	UP
XM_018048818.1	0.93453	0.781683	2.39319	0.0215676	0.0215676	-3.26916	NOT
XM_005679452.3	-0.498807	5.74811	-2.39286	0.0215847	0.0215847	-3.51299	NOT
MSTRG.10372.1	0.639095	3.62766	2.39215	0.0216209	0.0216209	-3.46604	NOT
XM_018051353.1	0.511855	4.11832	2.39196	0.0216305	0.0216305	-3.47591	NOT
MSTRG.6336.1	-0.952233	0.511828	-2.39153	0.0216524	0.0216524	-3.23718	NOT
XM_018057855.1	0.644399	0.956121	2.39144	0.0216573	0.0216573	-3.26398	NOT
XM_018065592.1	-0.929604	-0.0765891	-2.39109	0.021675	0.021675	-3.23634	NOT
XM_005695921.3	0.337209	4.63387	2.39102	0.0216785	0.0216785	-3.4987	NOT
XM_018056172.1	0.969973	3.50337	2.3901	0.0217262	0.0217262	-3.45308	NOT
XM_018065657.1	0.286218	2.80504	2.38962	0.0217509	0.0217509	-3.38812	NOT
XM_018059172.1	1.07439	0.259784	2.38954	0.0217549	0.0217549	-3.26065	UP
MSTRG.15830.1	0.335052	1.88075	2.38914	0.0217755	0.0217755	-3.30714	NOT
MSTRG.3525.2	0.642224	1.9329	2.38879	0.0217934	0.0217934	-3.31624	NOT
XM_018059626.1	0.548427	1.40396	2.38868	0.0217993	0.0217993	-3.31911	NOT
MSTRG.17198.1	3.01539	-0.0434739	2.38812	0.021828	0.021828	-3.25757	UP
XM_018042380.1	0.393903	4.33813	2.387	0.0218863	0.0218863	-3.49248	NOT
XM_005689383.3	0.991991	0.040872	2.38696	0.0218883	0.0218883	-3.24522	NOT
MSTRG.6668.2	0.846829	1.67634	2.38619	0.0219283	0.0219283	-3.33547	NOT
XM_018062593.1	1.26989	1.10979	2.38556	0.0219608	0.0219608	-3.27136	UP
XM_018052494.1	0.357084	2.5958	2.38518	0.0219804	0.0219804	-3.38056	NOT
MSTRG.6965.1	0.77604	1.96359	2.38477	0.0220019	0.0220019	-3.4133	NOT
MSTRG.13774.1	0.445767	3.10976	2.3844	0.0220214	0.0220214	-3.43864	NOT
MSTRG.14792.1	1.0646	0.874896	2.38338	0.0220745	0.0220745	-3.28815	UP
XM_013971270.2	0.639772	2.49641	2.38331	0.0220782	0.0220782	-3.37663	NOT
XM_018056680.1	0.771546	2.65065	2.38287	0.0221008	0.0221008	-3.41285	NOT
XM_018054011.1	0.947182	1.93392	2.38269	0.0221103	0.0221103	-3.32876	NOT
XM_005700493.3	-0.890385	0.728721	-2.38157	0.0221689	0.0221689	-3.29686	NOT
MSTRG.10304.1	0.676463	2.18639	2.38149	0.0221734	0.0221734	-3.44354	NOT
MSTRG.13278.3	0.701646	0.90731	2.38044	0.0222282	0.0222282	-3.28765	NOT
XM_018039056.1	-1.255	-0.498897	-2.37991	0.0222562	0.0222562	-3.25541	DOWN
XM_018057732.1	1.15749	-0.0760259	2.37934	0.0222862	0.0222862	-3.26591	UP
XM_005677733.3	0.884146	0.712103	2.37878	0.0223156	0.0223156	-3.29068	NOT
MSTRG.14181.1	-1.53199	-0.219052	-2.37849	0.022331	0.022331	-3.25788	DOWN
XM_005698342.3	-0.999477	1.3302	-2.37764	0.0223758	0.0223758	-3.28472	NOT
XM_013970631.2	1.16816	1.20491	2.37761	0.0223774	0.0223774	-3.33144	UP
MSTRG.7190.2	-1.72778	0.927108	-2.37735	0.022391	0.022391	-3.26515	DOWN
XM_013964211.2	-0.9161	0.5897	-2.37716	0.0224013	0.0224013	-3.26111	NOT
MSTRG.13310.4	-1.07212	6.66179	-2.37704	0.0224074	0.0224074	-3.55634	DOWN
XM_018059428.1	0.546383	0.539466	2.37676	0.0224222	0.0224222	-3.27806	NOT
XM_018050939.1	-0.893395	1.3367	-2.37624	0.0224498	0.0224498	-3.28734	NOT
XM_018038329.1	-0.283918	4.49602	-2.37599	0.022463	0.022463	-3.51615	NOT
MSTRG.13411.8	1.02172	0.0577169	2.37561	0.0224835	0.0224835	-3.26887	UP
XM_018059419.1	0.998625	0.921206	2.37542	0.0224933	0.0224933	-3.29405	NOT
MSTRG.13615.2	-0.583249	2.45186	-2.37499	0.0225164	0.0225164	-3.37989	NOT
XM_005686962.3	-0.365525	5.84281	-2.37492	0.0225199	0.0225199	-3.54896	NOT
XM_005689706.3	-0.930454	-0.0590423	-2.3748	0.0225261	0.0225261	-3.26414	NOT
XM_018048451.1	0.487316	3.07203	2.37431	0.0225524	0.0225524	-3.42882	NOT
XM_018048936.1	0.972646	0.337344	2.37413	0.0225621	0.0225621	-3.26928	NOT
XM_018057210.1	0.764254	0.624136	2.37346	0.0225975	0.0225975	-3.29378	NOT
XM_018059784.1	0.376069	2.21856	2.37339	0.0226015	0.0226015	-3.37785	NOT
MSTRG.1754.3	0.68936	2.02165	2.37306	0.0226191	0.0226191	-3.34515	NOT
XM_018040601.1	-0.41902	4.90917	-2.37304	0.0226201	0.0226201	-3.52869	NOT
XM_018050665.1	-1.14119	1.10006	-2.37155	0.0227	0.0227	-3.28868	DOWN
MSTRG.10806.1	0.531297	3.33681	2.37149	0.0227031	0.0227031	-3.49287	NOT
MSTRG.6909.1	0.569092	1.33376	2.37117	0.02272	0.02272	-3.31606	NOT
XM_005687021.2	-0.278134	3.6032	-2.37071	0.0227446	0.0227446	-3.46715	NOT
MSTRG.6816.5	0.965691	0.935925	2.37037	0.022763	0.022763	-3.30093	NOT
MSTRG.17502.1	-0.724626	3.65445	-2.37	0.0227828	0.0227828	-3.45147	NOT
XM_018066010.1	0.375783	5.01449	2.36983	0.0227922	0.0227922	-3.54898	NOT
MSTRG.3633.11	1.00667	0.220303	2.36904	0.0228346	0.0228346	-3.27621	UP
MSTRG.2703.1	0.564453	2.44904	2.36863	0.0228568	0.0228568	-3.39234	NOT
XM_018051105.1	0.944972	0.303293	2.3686	0.0228582	0.0228582	-3.27808	NOT
XM_005699218.3	-0.948923	3.43539	-2.36849	0.0228643	0.0228643	-3.45242	NOT
XM_005682108.3	-0.881728	-0.398677	-2.36846	0.022866	0.022866	-3.27499	NOT
MSTRG.9643.1	0.868356	2.24884	2.36748	0.0229188	0.0229188	-3.4019	NOT
XM_018054951.1	-1.0476	-0.494342	-2.36722	0.0229327	0.0229327	-3.27709	DOWN
MSTRG.16391.4	1.13487	-0.0721968	2.36687	0.0229513	0.0229513	-3.29329	UP
XM_018063843.1	1.41281	0.135353	2.36684	0.022953	0.022953	-3.30107	UP
XM_018062695.1	-0.736831	0.354609	-2.36672	0.0229599	0.0229599	-3.29542	NOT
XM_005676701.3	-1.50598	0.628673	-2.3658	0.0230093	0.0230093	-3.28974	DOWN
XM_018047856.1	0.507957	1.43351	2.36578	0.0230105	0.0230105	-3.34295	NOT
MSTRG.11707.2	-1.12448	0.596424	-2.36533	0.0230352	0.0230352	-3.28188	DOWN
XM_013969455.2	0.844628	0.334306	2.36513	0.0230459	0.0230459	-3.2919	NOT
MSTRG.1130.1	0.865284	1.96014	2.36255	0.0231863	0.0231863	-3.39912	NOT
XM_018045931.1	0.476658	2.55358	2.36224	0.0232032	0.0232032	-3.42679	NOT
XM_018041620.1	-1.28914	-0.368871	-2.36205	0.0232137	0.0232137	-3.28617	DOWN
XR_001918127.1	0.835177	0.477063	2.36189	0.0232223	0.0232223	-3.2985	NOT
MSTRG.16805.1	0.631118	1.78062	2.36158	0.0232394	0.0232394	-3.37775	NOT
XM_018047105.1	0.626032	3.62786	2.3615	0.0232435	0.0232435	-3.52783	NOT
MSTRG.8828.1	-1.29213	2.12752	-2.36128	0.0232555	0.0232555	-3.36306	DOWN
XM_018061123.1	0.522938	4.31805	2.35956	0.0233498	0.0233498	-3.55303	NOT
XM_018060459.1	0.28405	3.06858	2.35881	0.0233912	0.0233912	-3.47788	NOT
XM_018058137.1	-0.508664	3.9045	-2.35845	0.0234109	0.0234109	-3.52457	NOT
XM_013971557.2	0.724595	0.723709	2.3584	0.0234137	0.0234137	-3.31261	NOT
XM_018041844.1	1.04963	2.28463	2.35837	0.0234155	0.0234155	-3.43675	UP
MSTRG.9629.10	-0.459228	2.80506	-2.35817	0.0234262	0.0234262	-3.40614	NOT
XM_018059343.1	0.689057	1.58503	2.3581	0.0234305	0.0234305	-3.35106	NOT
MSTRG.10235.2	0.686685	2.93347	2.35783	0.0234452	0.0234452	-3.45769	NOT
MSTRG.12410.1	0.927026	1.82933	2.35761	0.0234572	0.0234572	-3.38565	NOT
XM_018045025.1	1.61171	1.10613	2.3571	0.0234853	0.0234853	-3.39388	UP
MSTRG.17884.1	0.714581	1.51496	2.3563	0.0235297	0.0235297	-3.34753	NOT
MSTRG.10464.5	0.517817	1.36883	2.35609	0.023541	0.023541	-3.34067	NOT
XM_005701009.3	-0.390926	4.67918	-2.35609	0.0235414	0.0235414	-3.55527	NOT
MSTRG.706.2	1.45044	0.678008	2.35605	0.0235432	0.0235432	-3.31692	UP
XM_018058829.1	0.856802	1.36911	2.35408	0.0236526	0.0236526	-3.33796	NOT
XM_005683074.3	-0.508633	2.07244	-2.35294	0.0237161	0.0237161	-3.37483	NOT
MSTRG.3145.1	-1.83795	1.0738	-2.35273	0.0237275	0.0237275	-3.30802	DOWN
MSTRG.10912.5	1.00808	0.182284	2.3523	0.0237518	0.0237518	-3.3053	UP
MSTRG.15229.4	1.19821	0.769334	2.35215	0.0237601	0.0237601	-3.32266	UP
XM_013972803.2	0.898167	1.34001	2.35213	0.0237614	0.0237614	-3.36419	NOT
XM_018057071.1	-0.949179	-0.0100288	-2.35132	0.0238063	0.0238063	-3.30475	NOT
XM_005685181.3	-0.363624	4.61222	-2.35115	0.0238157	0.0238157	-3.57018	NOT
XM_018048815.1	1.03373	1.92422	2.35065	0.0238437	0.0238437	-3.39588	UP
XM_018058379.1	0.754657	0.247105	2.34951	0.0239076	0.0239076	-3.32266	NOT
MSTRG.5307.1	0.547084	3.50973	2.34897	0.0239382	0.0239382	-3.51592	NOT
MSTRG.5775.19	-1.32027	-0.012103	-2.34892	0.0239409	0.0239409	-3.30818	DOWN
MSTRG.11021.1	0.647519	1.81018	2.34849	0.023965	0.023965	-3.37737	NOT
XM_005700534.3	-0.535131	3.57985	-2.34765	0.0240122	0.0240122	-3.48423	NOT
XM_005697542.3	0.49493	2.25443	2.34709	0.0240436	0.0240436	-3.44618	NOT
XM_018065750.1	-0.517055	2.97899	-2.34646	0.0240796	0.0240796	-3.45926	NOT
MSTRG.9874.1	0.548359	1.27744	2.34608	0.0241006	0.0241006	-3.36726	NOT
XM_018044287.1	0.972827	1.15461	2.34548	0.0241349	0.0241349	-3.37018	NOT
XM_005691559.3	-0.458405	5.02307	-2.34537	0.0241409	0.0241409	-3.59523	NOT
XM_005678691.2	-0.752293	0.494563	-2.34505	0.0241588	0.0241588	-3.31838	NOT
XM_005681484.3	1.16906	3.91705	2.34501	0.0241614	0.0241614	-3.61618	UP
XM_018059698.1	1.31521	0.068995	2.34474	0.0241767	0.0241767	-3.3383	UP
XM_013965759.2	-0.71533	1.63733	-2.34448	0.0241911	0.0241911	-3.35831	NOT
XM_018046945.1	0.480482	1.05583	2.34342	0.0242518	0.0242518	-3.35223	NOT
XR_001917314.1	-0.715225	3.47144	-2.34238	0.0243109	0.0243109	-3.48201	NOT
XM_018062328.1	-0.524539	1.34759	-2.34198	0.0243334	0.0243334	-3.3683	NOT
XM_018056474.1	1.45306	0.576163	2.34106	0.0243857	0.0243857	-3.33939	UP
MSTRG.5308.4	0.67314	0.493096	2.34073	0.0244049	0.0244049	-3.34853	NOT
XM_018066727.1	1.00052	1.26516	2.34053	0.0244162	0.0244162	-3.39054	UP
MSTRG.9236.5	-2.75891	1.85029	-2.33897	0.0245058	0.0245058	-3.45175	DOWN
XM_018066140.1	-0.783738	2.781	-2.33851	0.0245322	0.0245322	-3.44419	NOT
XM_018040531.1	0.781402	1.26299	2.33722	0.0246061	0.0246061	-3.38634	NOT
XM_018057944.1	0.602103	0.831071	2.33655	0.0246448	0.0246448	-3.36163	NOT
XM_018060872.1	0.777655	3.07242	2.33635	0.0246565	0.0246565	-3.5186	NOT
XM_005686700.3	0.288247	3.2802	2.33611	0.0246699	0.0246699	-3.54368	NOT
XM_018060563.1	1.05092	2.34765	2.33591	0.0246815	0.0246815	-3.49392	UP
MSTRG.6561.1	0.573053	1.48386	2.3358	0.0246879	0.0246879	-3.37688	NOT
XM_005695335.3	-0.658027	4.04544	-2.33551	0.0247045	0.0247045	-3.55797	NOT
XM_005697211.3	-0.846593	0.55853	-2.33484	0.0247435	0.0247435	-3.33375	NOT
XM_018051808.1	0.937345	0.322861	2.33347	0.0248228	0.0248228	-3.34546	NOT
MSTRG.17475.1	0.899711	1.54016	2.33329	0.0248336	0.0248336	-3.41548	NOT
XM_018038942.1	0.830571	0.928005	2.33327	0.0248348	0.0248348	-3.39305	NOT
XM_018061219.1	0.7565	0.764994	2.33302	0.0248492	0.0248492	-3.35687	NOT
XM_018055599.1	-1.18791	-0.0264931	-2.33262	0.0248724	0.0248724	-3.35385	DOWN
XM_013966542.2	0.458503	2.16337	2.33215	0.0248996	0.0248996	-3.43559	NOT
XM_018046555.1	-0.498028	3.77204	-2.33214	0.0249	0.0249	-3.53664	NOT
XM_018050104.1	1.28599	4.74555	2.33179	0.0249204	0.0249204	-3.63012	UP
XR_001918878.1	1.13947	2.59553	2.33085	0.0249756	0.0249756	-3.48506	UP
XM_018043525.1	-0.415227	3.85377	-2.3304	0.0250018	0.0250018	-3.58427	NOT
MSTRG.6104.17	1.5143	1.15069	2.3299	0.0250306	0.0250306	-3.44324	UP
XM_005680356.3	-1.1922	0.131965	-2.32976	0.0250389	0.0250389	-3.35636	DOWN
XM_013962450.2	0.521242	1.79859	2.32825	0.0251273	0.0251273	-3.42654	NOT
MSTRG.2339.29	1.76263	2.35707	2.32537	0.025297	0.025297	-3.5599	UP
XM_018063289.1	0.531052	3.2096	2.32536	0.0252978	0.0252978	-3.55393	NOT
XM_005678394.3	-0.562568	2.92473	-2.32517	0.0253087	0.0253087	-3.5258	NOT
XM_013974079.2	-1.1067	2.77887	-2.32484	0.0253282	0.0253282	-3.52405	DOWN
MSTRG.17062.10	0.670458	1.7205	2.32454	0.025346	0.025346	-3.41615	NOT
XM_005696038.2	-0.740543	2.1912	-2.3243	0.0253599	0.0253599	-3.42193	NOT
MSTRG.10046.2	0.415183	4.21803	2.32413	0.0253704	0.0253704	-3.60654	NOT
XM_018057814.1	1.22696	-0.22531	2.32402	0.0253768	0.0253768	-3.3508	UP
MSTRG.5738.3	1.18671	3.96725	2.32396	0.0253801	0.0253801	-3.63685	UP
MSTRG.10800.3	1.22423	2.31652	2.32364	0.0253991	0.0253991	-3.51624	UP
MSTRG.15338.1	0.506331	1.6261	2.32354	0.0254053	0.0254053	-3.4178	NOT
XM_013965703.2	1.03175	1.38631	2.32276	0.0254512	0.0254512	-3.47053	UP
XM_018048996.1	-0.755209	0.79069	-2.32254	0.0254645	0.0254645	-3.3625	NOT
MSTRG.15908.1	0.838559	1.10357	2.32232	0.0254772	0.0254772	-3.37445	NOT
XM_018048652.1	0.591398	3.38449	2.32203	0.0254948	0.0254948	-3.56724	NOT
NM_001285760.1	0.901307	0.266391	2.32165	0.0255171	0.0255171	-3.36174	NOT
MSTRG.14326.1	0.435807	2.38157	2.32143	0.0255306	0.0255306	-3.48022	NOT
MSTRG.3368.4	0.470085	1.71788	2.3214	0.0255324	0.0255324	-3.41998	NOT
XM_005701428.3	0.642888	2.46981	2.32129	0.0255389	0.0255389	-3.47493	NOT
MSTRG.3004.2	1.45756	0.101172	2.3208	0.025568	0.025568	-3.37462	UP
XM_018062037.1	0.445129	2.39192	2.31994	0.025619	0.025619	-3.48001	NOT
XM_018055898.1	1.19224	0.546677	2.31989	0.025622	0.025622	-3.40469	UP
MSTRG.634.1	-0.888689	2.12126	-2.31988	0.0256227	0.0256227	-3.41703	NOT
XR_001917188.1	0.457644	3.83068	2.31981	0.0256269	0.0256269	-3.59491	NOT
XM_018059205.1	0.770849	0.208464	2.31957	0.0256416	0.0256416	-3.36627	NOT
MSTRG.11215.2	-1.64131	1.4049	-2.31929	0.0256583	0.0256583	-3.44345	DOWN
XM_018045153.1	0.898489	1.18465	2.31893	0.0256799	0.0256799	-3.45732	NOT
XM_018062624.1	0.998935	0.318057	2.31884	0.025685	0.025685	-3.39724	NOT
XM_018064663.1	0.646957	1.72136	2.31877	0.0256893	0.0256893	-3.4505	NOT
XM_018059897.1	-0.955996	0.040872	-2.31875	0.0256901	0.0256901	-3.35932	NOT
MSTRG.4790.1	0.558103	3.23799	2.31814	0.025727	0.025727	-3.57079	NOT
XM_013964335.2	-0.565909	5.86686	-2.31749	0.025766	0.025766	-3.66637	NOT
MSTRG.14404.1	-0.565284	2.3714	-2.31682	0.0258059	0.0258059	-3.47219	NOT
XM_013972730.2	0.975878	0.320267	2.31678	0.0258083	0.0258083	-3.38116	NOT
MSTRG.9065.4	0.543214	1.77174	2.31673	0.0258114	0.0258114	-3.44502	NOT
XM_005680717.3	0.806091	1.16782	2.31667	0.0258152	0.0258152	-3.43071	NOT
XM_018061213.1	-1.28363	0.391398	-2.31654	0.0258228	0.0258228	-3.37278	DOWN
XM_005675936.3	-0.359476	6.86984	-2.31627	0.025839	0.025839	-3.68009	NOT
XM_005698197.3	-0.514771	1.7255	-2.31579	0.025868	0.025868	-3.41957	NOT
XM_018048432.1	-1.53579	1.5489	-2.31574	0.025871	0.025871	-3.40878	DOWN
XM_005679977.3	-1.40659	-0.37221	-2.31569	0.0258738	0.0258738	-3.36437	DOWN
XM_018062025.1	-0.939052	0.68003	-2.31549	0.025886	0.025886	-3.41317	NOT
XM_018057236.1	-1.02891	0.48767	-2.31521	0.0259028	0.0259028	-3.36851	DOWN
XM_018046830.1	-0.742924	0.35078	-2.31506	0.0259121	0.0259121	-3.37687	NOT
XM_018051420.1	0.643141	2.17936	2.31492	0.0259204	0.0259204	-3.47429	NOT
XM_018040437.1	0.78089	0.369231	2.31484	0.025925	0.025925	-3.39103	NOT
XM_018050325.1	0.469603	3.58209	2.31424	0.0259614	0.0259614	-3.58669	NOT
XM_005683043.3	-0.634048	4.50897	-2.31324	0.0260223	0.0260223	-3.63675	NOT
MSTRG.5938.6	0.366467	1.3823	2.31315	0.0260274	0.0260274	-3.4269	NOT
MSTRG.12863.7	0.814582	0.156105	2.31307	0.0260326	0.0260326	-3.37606	NOT
XM_018038929.1	1.19139	1.62056	2.3121	0.026091	0.026091	-3.52113	UP
XM_018041500.1	0.74479	1.60863	2.31163	0.0261199	0.0261199	-3.42835	NOT
MSTRG.10007.1	0.937233	0.31659	2.31161	0.0261207	0.0261207	-3.39102	NOT
MSTRG.5780.1	1.34795	1.06891	2.31142	0.0261327	0.0261327	-3.39856	UP
XM_018063745.1	0.700561	0.559938	2.31131	0.0261389	0.0261389	-3.39857	NOT
MSTRG.6901.1	-0.568185	1.55896	-2.31127	0.0261413	0.0261413	-3.41511	NOT
MSTRG.2339.15	-0.977765	-0.35365	-2.3111	0.0261517	0.0261517	-3.37175	NOT
MSTRG.1875.2	-0.591339	2.3129	-2.31007	0.0262147	0.0262147	-3.45244	NOT
XM_018050018.1	0.431427	1.49047	2.30956	0.0262457	0.0262457	-3.45444	NOT
MSTRG.11393.4	0.9501	0.220723	2.30846	0.0263126	0.0263126	-3.37733	NOT
XM_005678646.3	-1.15793	3.86684	-2.30761	0.0263648	0.0263648	-3.57117	DOWN
XM_005680926.2	0.728427	4.42942	2.30754	0.0263689	0.0263689	-3.66506	NOT
XM_018056189.1	0.894259	2.18606	2.30741	0.0263771	0.0263771	-3.50397	NOT
XM_018043830.1	0.459645	1.58308	2.30727	0.0263854	0.0263854	-3.45505	NOT
XM_018057955.1	-1.02477	0.00341631	-2.30711	0.0263957	0.0263957	-3.38235	DOWN
MSTRG.7234.14	-1.44362	0.692088	-2.30708	0.0263976	0.0263976	-3.38338	DOWN
XM_018055736.1	0.903601	1.36222	2.30665	0.0264236	0.0264236	-3.46101	NOT
MSTRG.3866.2	0.495684	2.05867	2.30622	0.0264501	0.0264501	-3.48246	NOT
XM_018051918.1	0.665038	2.93544	2.30588	0.026471	0.026471	-3.55186	NOT
XM_018060393.1	-0.928765	0.611978	-2.30581	0.0264754	0.0264754	-3.38639	NOT
MSTRG.4903.1	-1.38774	-0.331569	-2.30561	0.0264878	0.0264878	-3.38123	DOWN
XM_018043927.1	0.357496	2.85799	2.30559	0.0264891	0.0264891	-3.57391	NOT
XM_018054288.1	-0.495187	8.10117	-2.30546	0.0264966	0.0264966	-3.71008	NOT
NM_001286962.1	-0.329957	8.11627	-2.30514	0.0265167	0.0265167	-3.71419	NOT
XM_018058077.1	1.27116	0.531938	2.30393	0.0265909	0.0265909	-3.44157	UP
XM_005681579.2	0.750076	0.523032	2.30311	0.0266418	0.0266418	-3.46537	NOT
MSTRG.9356.13	-1.70305	1.39579	-2.30308	0.0266435	0.0266435	-3.41365	DOWN
MSTRG.4098.2	-0.991252	0.469749	-2.30305	0.0266453	0.0266453	-3.38845	NOT
MSTRG.11217.1	0.89579	1.81648	2.30293	0.0266531	0.0266531	-3.47932	NOT
XM_005694976.3	-0.293464	4.18977	-2.30255	0.0266761	0.0266761	-3.6432	NOT
XM_018060868.1	-0.765844	1.46548	-2.30252	0.0266781	0.0266781	-3.43243	NOT
XM_018054268.1	0.417106	3.1582	2.3025	0.0266796	0.0266796	-3.58642	NOT
XM_018040719.1	-1.45629	0.731187	-2.30248	0.0266805	0.0266805	-3.39454	DOWN
MSTRG.12950.5	-1.86391	-0.646866	-2.30187	0.0267183	0.0267183	-3.39015	DOWN
XM_005685915.3	-0.369845	3.02437	-2.30166	0.0267316	0.0267316	-3.54941	NOT
MSTRG.261.3	0.827224	1.33646	2.30143	0.0267457	0.0267457	-3.56864	NOT
XM_013974166.2	0.28862	2.99719	2.30131	0.0267534	0.0267534	-3.57552	NOT
XM_018058696.1	2.10335	3.67984	2.30128	0.0267553	0.0267553	-3.65786	UP
MSTRG.14074.23	1.58324	-0.605858	2.30116	0.0267626	0.0267626	-3.39211	UP
MSTRG.5177.11	1.28154	0.968126	2.29994	0.0268386	0.0268386	-3.46483	UP
XM_005679155.3	-1.18824	-0.396033	-2.29985	0.026844	0.026844	-3.3905	DOWN
XM_018047623.1	-0.503126	3.28209	-2.29984	0.0268449	0.0268449	-3.58116	NOT
MSTRG.8596.3	0.6676	2.35057	2.29972	0.0268521	0.0268521	-3.53995	NOT
MSTRG.3730.1	1.0984	0.896464	2.29942	0.0268711	0.0268711	-3.43453	UP
XM_005699274.3	-1.26672	1.29553	-2.29932	0.0268767	0.0268767	-3.43536	DOWN
XM_013971985.2	-1.45324	0.270196	-2.29929	0.026879	0.026879	-3.40055	DOWN
XM_005700591.3	0.881387	0.906393	2.29868	0.0269171	0.0269171	-3.41145	NOT
XM_018045779.1	-0.687232	1.65584	-2.29731	0.0270028	0.0270028	-3.45765	NOT
XM_018044743.1	-0.531624	5.75788	-2.29718	0.0270106	0.0270106	-3.70685	NOT
XM_013971020.2	-0.903832	4.98825	-2.29679	0.0270352	0.0270352	-3.68858	NOT
XM_005683410.3	-0.432513	5.52367	-2.29643	0.0270577	0.0270577	-3.70261	NOT
XR_001296242.2	0.579618	6.08334	2.29562	0.0271087	0.0271087	-3.71406	NOT
XM_018050291.1	-0.485373	5.3244	-2.29539	0.0271232	0.0271232	-3.70498	NOT
XM_005696603.3	-1.15602	0.343101	-2.29517	0.0271369	0.0271369	-3.39958	DOWN
XM_005696302.2	-0.855991	-0.186174	-2.29505	0.027144	0.027144	-3.39855	NOT
MSTRG.15141.3	0.55146	3.28256	2.29479	0.0271606	0.0271606	-3.62369	NOT
XM_018046143.1	0.535356	2.12495	2.29456	0.0271752	0.0271752	-3.52109	NOT
XM_018048197.1	-0.856609	1.11886	-2.29367	0.027231	0.027231	-3.41671	NOT
MSTRG.12477.1	0.63919	2.7448	2.29362	0.0272342	0.0272342	-3.59781	NOT
XM_018048894.1	0.257128	3.93702	2.2931	0.0272672	0.0272672	-3.66443	NOT
XM_018042357.1	0.654982	1.21292	2.29258	0.0273	0.0273	-3.47163	NOT
XM_005697517.3	-0.891634	0.406345	-2.29254	0.0273025	0.0273025	-3.40715	NOT
XM_018059404.1	-0.738835	0.333855	-2.29215	0.027327	0.027327	-3.41107	NOT
XM_018051453.1	0.726395	0.613982	2.29212	0.0273289	0.0273289	-3.41447	NOT
XM_018057336.1	-0.687499	3.36411	-2.2919	0.0273429	0.0273429	-3.56834	NOT
XR_001296756.2	-1.81202	4.1983	-2.29185	0.0273464	0.0273464	-3.62869	DOWN
XM_018051443.1	0.316896	2.96161	2.29157	0.0273642	0.0273642	-3.58298	NOT
MSTRG.17507.1	0.886739	0.774249	2.29077	0.0274145	0.0274145	-3.4516	NOT
MSTRG.2558.2	-0.88221	0.270018	-2.29074	0.0274164	0.0274164	-3.40783	NOT
XM_005694007.3	-1.55982	0.123547	-2.29028	0.0274456	0.0274456	-3.40752	DOWN
MSTRG.3506.2	0.523574	1.54642	2.28985	0.0274733	0.0274733	-3.47306	NOT
MSTRG.2970.5	0.96678	0.480412	2.2898	0.0274763	0.0274763	-3.43789	NOT
MSTRG.5531.1	0.519668	2.28394	2.28955	0.027492	0.027492	-3.5283	NOT
MSTRG.7452.2	0.455429	3.101	2.28929	0.0275086	0.0275086	-3.61483	NOT
XM_018041256.1	-0.565362	1.91376	-2.28906	0.0275235	0.0275235	-3.48228	NOT
MSTRG.11658.2	1.01729	0.138558	2.28837	0.0275674	0.0275674	-3.41795	UP
XM_018040061.1	1.06641	0.27447	2.28764	0.0276138	0.0276138	-3.46415	UP
MSTRG.291.1	0.523717	1.97832	2.28689	0.027662	0.027662	-3.5144	NOT
XM_013968949.2	-0.563538	5.10787	-2.28687	0.0276631	0.0276631	-3.7138	NOT
XM_005679510.3	-0.905251	2.62318	-2.28596	0.0277211	0.0277211	-3.52214	NOT
MSTRG.12229.4	0.817289	0.174976	2.28488	0.0277908	0.0277908	-3.43526	NOT
MSTRG.8364.1	0.508313	2.80103	2.28481	0.0277951	0.0277951	-3.60241	NOT
XM_018039118.1	-0.996444	2.89191	-2.28357	0.0278747	0.0278747	-3.5561	NOT
MSTRG.11576.1	0.694239	0.578206	2.283	0.0279118	0.0279118	-3.48154	NOT
XM_018060394.1	-0.451719	7.06467	-2.28285	0.0279212	0.0279212	-3.74564	NOT
XM_005693678.3	0.545703	3.92373	2.28279	0.027925	0.027925	-3.67811	NOT
MSTRG.5555.2	0.346319	2.0439	2.28238	0.0279516	0.0279516	-3.52155	NOT
XM_005683754.3	-0.722756	6.14013	-2.28237	0.0279521	0.0279521	-3.7313	NOT
XM_005709548.3	0.313451	3.12552	2.28234	0.0279542	0.0279542	-3.61923	NOT
XM_018066686.1	0.522965	1.64473	2.28067	0.0280622	0.0280622	-3.52175	NOT
XM_018067069.1	0.959673	1.81974	2.28066	0.0280626	0.0280626	-3.52313	NOT
XM_005685393.3	-2.12827	2.77199	-2.28054	0.0280702	0.0280702	-3.6837	DOWN
MSTRG.2410.22	1.22557	0.549471	2.27952	0.0281367	0.0281367	-3.44443	UP
MSTRG.12834.4	-0.979236	0.171289	-2.2794	0.0281445	0.0281445	-3.42452	NOT
XR_001918849.1	-0.458744	1.97169	-2.27899	0.0281708	0.0281708	-3.5055	NOT
XM_005693429.3	-0.333652	4.09096	-2.27858	0.0281976	0.0281976	-3.67875	NOT
MSTRG.17952.2	0.588213	1.02784	2.27814	0.0282266	0.0282266	-3.46908	NOT
XM_018052700.1	-1.19951	-0.479067	-2.27809	0.0282298	0.0282298	-3.4286	DOWN
XM_018049854.1	1.42193	1.5084	2.27803	0.0282337	0.0282337	-3.5944	UP
XM_005694010.3	-0.982648	1.67759	-2.27755	0.0282647	0.0282647	-3.48437	NOT
XM_018061689.1	-0.915585	1.17207	-2.27717	0.0282894	0.0282894	-3.47607	NOT
MSTRG.3614.6	1.35484	2.53892	2.27694	0.0283046	0.0283046	-3.63422	UP
MSTRG.14950.1	0.509525	1.95575	2.2767	0.0283204	0.0283204	-3.5288	NOT
XM_018039661.1	0.892156	1.12711	2.27661	0.0283262	0.0283262	-3.49314	NOT
XM_005677334.3	-1.27203	0.171661	-2.27613	0.0283578	0.0283578	-3.43899	DOWN
XM_018058029.1	-0.701469	1.06713	-2.27612	0.0283585	0.0283585	-3.45249	NOT
XM_018049294.1	0.285911	2.58048	2.27598	0.0283671	0.0283671	-3.57942	NOT
XM_018042752.1	-0.433696	4.64596	-2.27575	0.0283825	0.0283825	-3.70866	NOT
XR_001917782.1	-1.0381	0.172687	-2.2755	0.0283989	0.0283989	-3.46846	DOWN
XM_018055784.1	0.86568	1.14906	2.27431	0.028477	0.028477	-3.50144	NOT
XM_018039120.1	0.453098	2.42302	2.27416	0.0284865	0.0284865	-3.58987	NOT
XM_018060312.1	0.41624	1.74288	2.27402	0.0284958	0.0284958	-3.52705	NOT
XM_018039941.1	0.423161	2.73008	2.27373	0.0285151	0.0285151	-3.61536	NOT
XM_013965535.2	-0.71017	4.34654	-2.27359	0.0285238	0.0285238	-3.72858	NOT
XM_018043251.1	0.584439	2.29683	2.27355	0.028527	0.028527	-3.58938	NOT
XM_018061379.1	0.865014	1.40098	2.27331	0.0285425	0.0285425	-3.53	NOT
XM_018052912.1	0.991074	1.26734	2.27271	0.0285816	0.0285816	-3.53558	NOT
MSTRG.11257.1	0.809856	0.814023	2.27234	0.0286063	0.0286063	-3.4877	NOT
XM_018040973.1	0.693911	6.16766	2.2722	0.0286154	0.0286154	-3.76029	NOT
XM_018052436.1	1.08241	-0.126397	2.27195	0.0286318	0.0286318	-3.44106	UP
XM_018058202.1	1.07183	-0.299524	2.27179	0.0286427	0.0286427	-3.44998	UP
XR_001918560.1	-0.610439	2.2426	-2.27133	0.0286726	0.0286726	-3.52141	NOT
XM_018043053.1	-0.922094	2.72295	-2.27122	0.0286804	0.0286804	-3.65333	NOT
MSTRG.4200.1	-2.07563	0.45893	-2.27089	0.0287022	0.0287022	-3.44736	DOWN
XM_005674665.3	-0.393525	6.73115	-2.26963	0.028785	0.028785	-3.76937	NOT
XM_018056066.1	0.400043	3.72458	2.26905	0.0288241	0.0288241	-3.6927	NOT
XM_018041031.1	-0.617922	2.13127	-2.26889	0.0288342	0.0288342	-3.53549	NOT
MSTRG.4384.1	0.435256	3.79898	2.26862	0.0288524	0.0288524	-3.70104	NOT
XM_018062600.1	1.26176	0.488669	2.26854	0.0288575	0.0288575	-3.5353	UP
XM_018053494.1	1.05074	-0.351744	2.2685	0.0288606	0.0288606	-3.45071	UP
MSTRG.3823.1	0.641609	2.34204	2.26809	0.0288878	0.0288878	-3.58125	NOT
XM_005688548.3	-0.673362	3.81612	-2.26804	0.0288908	0.0288908	-3.67282	NOT
MSTRG.3147.7	-2.39526	1.21078	-2.26801	0.0288928	0.0288928	-3.47971	DOWN
XM_018044445.1	-0.456743	4.78954	-2.2676	0.02892	0.02892	-3.72796	NOT
XR_001917518.1	-0.457467	3.81664	-2.26732	0.0289391	0.0289391	-3.67969	NOT
XM_018057103.1	1.08481	-0.0112053	2.26702	0.028959	0.028959	-3.45489	UP
MSTRG.1363.2	0.458063	4.0324	2.26676	0.028976	0.028976	-3.73384	NOT
XM_005685061.3	0.373196	4.88118	2.26675	0.0289769	0.0289769	-3.75698	NOT
XM_018052254.1	0.757566	3.01515	2.26527	0.0290758	0.0290758	-3.69724	NOT
MSTRG.5022.1	0.870314	0.617732	2.26457	0.0291223	0.0291223	-3.49509	NOT
XM_018042862.1	0.500765	3.95301	2.26418	0.0291488	0.0291488	-3.72032	NOT
XM_018048867.1	-0.616307	2.16065	-2.26349	0.0291945	0.0291945	-3.54584	NOT
XM_018054069.1	1.03858	1.71031	2.26347	0.0291964	0.0291964	-3.58963	UP
XM_018062728.1	0.865591	4.69779	2.26342	0.0291996	0.0291996	-3.75871	NOT
XM_005695752.3	0.617414	0.932591	2.2628	0.0292414	0.0292414	-3.48748	NOT
XM_018065467.1	1.05953	1.50008	2.26278	0.0292423	0.0292423	-3.52891	UP
XM_005685625.2	-0.47142	10.3133	-2.26164	0.0293195	0.0293195	-3.81156	NOT
XM_018042107.1	0.96837	0.72623	2.26149	0.029329	0.029329	-3.51463	NOT
XM_018059013.1	0.958791	0.651242	2.26091	0.0293685	0.0293685	-3.52106	NOT
MSTRG.1772.13	1.24434	0.632683	2.26078	0.0293775	0.0293775	-3.47896	UP
XM_018062314.1	1.2188	0.065538	2.26058	0.0293906	0.0293906	-3.49138	UP
MSTRG.14531.1	0.864181	0.788035	2.26044	0.0294003	0.0294003	-3.4981	NOT
XM_005697064.3	-0.678716	2.059	-2.26042	0.0294017	0.0294017	-3.52844	NOT
XM_018051293.1	-0.836305	1.95645	-2.26037	0.0294047	0.0294047	-3.53408	NOT
XM_018040775.1	-0.828009	2.44044	-2.26035	0.0294064	0.0294064	-3.56198	NOT
XM_005675453.3	-0.628546	3.54243	-2.25936	0.0294735	0.0294735	-3.66457	NOT
XM_018063825.1	0.893748	2.13491	2.25934	0.0294745	0.0294745	-3.57	NOT
XM_005697862.3	0.432606	2.37286	2.25924	0.0294812	0.0294812	-3.59523	NOT
MSTRG.12226.12	1.02893	0.499601	2.25875	0.0295145	0.0295145	-3.53379	UP
XM_018051445.1	-1.34572	0.680195	-2.25848	0.0295326	0.0295326	-3.46824	DOWN
XM_018061763.1	0.512938	4.16276	2.25841	0.0295372	0.0295372	-3.74532	NOT
XM_018044253.1	-0.405599	1.29061	-2.2583	0.0295451	0.0295451	-3.5045	NOT
MSTRG.6915.4	0.802616	0.636396	2.25823	0.02955	0.02955	-3.48786	NOT
XM_018065221.1	1.01588	-0.172254	2.25812	0.0295569	0.0295569	-3.46133	UP
XM_018061432.1	0.671975	3.35262	2.25811	0.029558	0.029558	-3.69799	NOT
XM_018049299.1	0.785422	0.554853	2.25751	0.0295985	0.0295985	-3.49676	NOT
XM_005684574.3	1.07125	0.308025	2.2566	0.0296606	0.0296606	-3.53352	UP
MSTRG.1456.1	0.691201	2.03034	2.25617	0.02969	0.02969	-3.57586	NOT
XM_018055935.1	0.956751	1.29466	2.25616	0.0296901	0.0296901	-3.56388	NOT
MSTRG.4389.2	0.755081	1.5866	2.25561	0.0297281	0.0297281	-3.55174	NOT
XM_018045374.1	3.74478	4.62154	2.25558	0.0297302	0.0297302	-3.75215	UP
MSTRG.1485.1	0.515233	2.04607	2.25534	0.0297466	0.0297466	-3.57241	NOT
XM_005691557.3	1.05374	-0.191089	2.25526	0.0297515	0.0297515	-3.48642	UP
MSTRG.10780.2	-0.845	-0.0825781	-2.25437	0.0298125	0.0298125	-3.46554	NOT
MSTRG.3321.6	0.924257	0.602578	2.25423	0.0298221	0.0298221	-3.4831	NOT
MSTRG.11457.9	0.497034	1.03432	2.25388	0.0298464	0.0298464	-3.50947	NOT
XM_018059383.1	0.928501	1.36446	2.25366	0.029861	0.029861	-3.56399	NOT
XM_005675642.3	-1.24392	0.260922	-2.25349	0.0298729	0.0298729	-3.48382	DOWN
XM_018045454.1	1.40697	0.396643	2.25327	0.0298877	0.0298877	-3.48871	UP
MSTRG.3644.1	-1.59992	2.04389	-2.25267	0.029929	0.029929	-3.50239	DOWN
XM_018053844.1	-0.354991	6.76285	-2.25266	0.0299299	0.0299299	-3.8033	NOT
XM_018041825.1	1.24293	1.35921	2.25245	0.0299442	0.0299442	-3.60097	UP
XM_018054111.1	0.695331	0.557996	2.25116	0.0300327	0.0300327	-3.49789	NOT
MSTRG.8401.1	-0.350749	3.87656	-2.25097	0.0300455	0.0300455	-3.7332	NOT
XM_018052164.1	0.72799	2.88176	2.25082	0.0300563	0.0300563	-3.6962	NOT
MSTRG.5119.8	0.991648	-0.10636	2.25029	0.0300931	0.0300931	-3.4991	NOT
XM_005675001.3	-0.517803	3.4142	-2.24981	0.0301262	0.0301262	-3.67533	NOT
XM_018051370.1	0.493715	4.78122	2.24974	0.0301308	0.0301308	-3.78695	NOT
MSTRG.9159.3	0.470301	2.83667	2.24901	0.0301809	0.0301809	-3.64933	NOT
XM_005676159.3	-0.562914	3.14672	-2.24737	0.0302949	0.0302949	-3.63577	NOT
XM_005694862.3	-0.448575	5.13944	-2.24708	0.030315	0.030315	-3.78327	NOT
MSTRG.690.4	0.898499	3.3436	2.24668	0.0303428	0.0303428	-3.71072	NOT
MSTRG.623.12	0.768188	1.38226	2.24654	0.0303519	0.0303519	-3.55243	NOT
XM_018050988.1	0.9088	0.94525	2.24641	0.0303614	0.0303614	-3.53667	NOT
XM_018044278.1	-1.46877	1.37161	-2.2464	0.0303622	0.0303622	-3.49715	DOWN
XM_018058312.1	1.03671	0.921143	2.246	0.0303897	0.0303897	-3.56614	UP
XM_018038713.1	1.07003	0.807738	2.24577	0.0304059	0.0304059	-3.52011	UP
XM_018048686.1	0.969921	3.60174	2.24576	0.0304063	0.0304063	-3.7479	NOT
MSTRG.10016.2	0.894009	0.351652	2.24562	0.0304164	0.0304164	-3.51998	NOT
XM_018040146.1	0.508158	3.0944	2.24548	0.0304263	0.0304263	-3.71288	NOT
XM_018039553.1	0.447798	0.667862	2.24504	0.0304566	0.0304566	-3.51897	NOT
MSTRG.5437.1	0.802168	6.90821	2.24433	0.0305063	0.0305063	-3.8261	NOT
XM_018060701.1	-0.555474	1.03208	-2.24433	0.0305065	0.0305065	-3.51927	NOT
XM_018041245.1	0.234456	3.66283	2.24421	0.0305144	0.0305144	-3.73793	NOT
XM_013969498.2	-0.708812	2.03815	-2.2439	0.0305361	0.0305361	-3.55225	NOT
XM_018042010.1	-0.952944	0.542672	-2.24357	0.0305594	0.0305594	-3.49999	NOT
XM_005686498.3	-0.807619	1.13524	-2.24345	0.0305679	0.0305679	-3.52492	NOT
MSTRG.14364.9	0.531098	1.05541	2.24329	0.030579	0.030579	-3.52811	NOT
XM_018047870.1	-0.628035	0.609371	-2.24314	0.0305891	0.0305891	-3.50512	NOT
XM_005680147.3	-0.736251	2.13255	-2.24301	0.0305986	0.0305986	-3.57371	NOT
MSTRG.12094.1	0.41754	1.49865	2.24154	0.0307016	0.0307016	-3.5656	NOT
XM_013976041.1	-0.990363	-0.261558	-2.24091	0.0307456	0.0307456	-3.4879	NOT
XR_001918708.1	0.966224	0.850252	2.24048	0.0307759	0.0307759	-3.54934	NOT
MSTRG.13941.4	1.42843	3.49381	2.24042	0.0307804	0.0307804	-3.80947	UP
MSTRG.6478.7	0.668272	3.55159	2.23958	0.0308394	0.0308394	-3.76528	NOT
XM_018055901.1	1.01677	0.827267	2.23951	0.0308441	0.0308441	-3.57174	UP
MSTRG.6347.2	0.842522	-0.0302192	2.23917	0.030868	0.030868	-3.4977	NOT
XM_018041876.1	-0.392703	4.91389	-2.23908	0.0308743	0.0308743	-3.78502	NOT
XM_018054897.1	0.396893	3.1646	2.23825	0.0309334	0.0309334	-3.73087	NOT
XM_018052037.1	0.542618	1.39428	2.23796	0.0309538	0.0309538	-3.57321	NOT
XM_018042294.1	-0.949863	0.431408	-2.23761	0.0309785	0.0309785	-3.49719	NOT
XM_005692248.3	1.12292	0.447964	2.23749	0.0309871	0.0309871	-3.51997	UP
XM_005685532.3	0.537118	1.22161	2.23737	0.0309955	0.0309955	-3.56427	NOT
XM_005695799.3	0.974643	1.09051	2.2372	0.0310071	0.0310071	-3.5458	NOT
MSTRG.11035.1	0.800332	0.461491	2.23525	0.0311454	0.0311454	-3.50581	NOT
XM_005677388.3	-0.973611	2.49702	-2.23487	0.0311726	0.0311726	-3.67278	NOT
XM_018060385.1	0.746798	1.18163	2.23465	0.0311884	0.0311884	-3.56947	NOT
XM_018061920.1	1.47852	2.23031	2.23458	0.0311933	0.0311933	-3.70591	UP
XM_018049834.1	0.692205	3.4897	2.23454	0.0311961	0.0311961	-3.76563	NOT
XM_018051241.1	0.91111	3.05452	2.23421	0.0312198	0.0312198	-3.72339	NOT
XM_005686928.3	-0.397556	2.05747	-2.23399	0.0312356	0.0312356	-3.59214	NOT
XM_018057224.1	-0.328585	6.72887	-2.2339	0.0312419	0.0312419	-3.84013	NOT
TRNAS-AGA_2	1.07439	0.253925	2.23389	0.0312427	0.0312427	-3.51182	UP
XM_005684492.3	0.500416	1.50561	2.2338	0.0312488	0.0312488	-3.58599	NOT
MSTRG.15721.2	-0.412934	4.08189	-2.2338	0.0312493	0.0312493	-3.78616	NOT
XM_018057425.1	-1.16821	0.249714	-2.23341	0.0312767	0.0312767	-3.50074	DOWN
MSTRG.3960.2	-0.963601	0.00394631	-2.23339	0.0312785	0.0312785	-3.51864	NOT
XM_018039617.1	-0.321778	6.90357	-2.23217	0.0313652	0.0313652	-3.84538	NOT
XM_005689157.3	-0.415051	3.89808	-2.23214	0.0313676	0.0313676	-3.75358	NOT
MSTRG.16168.3	1.59512	1.90229	2.23176	0.0313951	0.0313951	-3.79666	UP
MSTRG.15980.1	0.273349	3.26741	2.23151	0.0314128	0.0314128	-3.72246	NOT
XM_018053259.1	1.08777	-0.488353	2.23122	0.0314336	0.0314336	-3.51096	UP
MSTRG.7856.3	0.903916	0.59577	2.23005	0.0315172	0.0315172	-3.51478	NOT
MSTRG.9214.1	1.044	0.782136	2.22984	0.0315326	0.0315326	-3.63607	UP
XM_005693137.3	-0.979482	0.668632	-2.22948	0.0315583	0.0315583	-3.51178	NOT
XM_005691461.3	-1.11521	4.55601	-2.22944	0.031561	0.031561	-3.78341	DOWN
XM_018045858.1	-0.264263	5.19342	-2.22934	0.0315685	0.0315685	-3.82218	NOT
XM_005677925.3	-0.350584	5.24526	-2.2291	0.0315856	0.0315856	-3.82785	NOT
XM_018038993.1	0.677975	2.30443	2.22867	0.0316165	0.0316165	-3.64701	NOT
XM_005688202.3	-0.313771	2.81112	-2.22811	0.0316573	0.0316573	-3.67669	NOT
MSTRG.17867.1	-1.18902	1.57059	-2.2279	0.0316722	0.0316722	-3.66448	DOWN
MSTRG.8834.1	-1.23256	0.56909	-2.22747	0.0317033	0.0317033	-3.52289	DOWN
XR_310994.3	0.596864	7.85794	2.22715	0.0317265	0.0317265	-3.86587	NOT
XM_018052342.1	-1.30141	1.05542	-2.22702	0.031736	0.031736	-3.53823	DOWN
XM_018045162.1	-1.31109	0.122706	-2.22699	0.0317382	0.0317382	-3.51221	DOWN
XM_018061130.1	-0.33983	7.87599	-2.22683	0.0317496	0.0317496	-3.86592	NOT
MSTRG.7880.1	0.629039	2.5991	2.22678	0.0317529	0.0317529	-3.7314	NOT
XM_018039919.1	0.568586	1.68623	2.22498	0.0318833	0.0318833	-3.60865	NOT
XM_005691654.3	-0.410153	3.91503	-2.22469	0.0319043	0.0319043	-3.77185	NOT
XM_018060179.1	0.677868	2.08182	2.22439	0.0319265	0.0319265	-3.6409	NOT
XM_005687038.2	-0.286001	4.95953	-2.22429	0.0319335	0.0319335	-3.83189	NOT
XM_005694771.3	-0.730002	1.6907	-2.2242	0.0319401	0.0319401	-3.59024	NOT
XM_018064698.1	-0.622559	2.49172	-2.22378	0.0319706	0.0319706	-3.62947	NOT
XM_018060157.1	0.981883	0.963952	2.22323	0.0320111	0.0320111	-3.58353	NOT
XM_018042913.1	0.434504	4.47344	2.22316	0.0320157	0.0320157	-3.82247	NOT
XM_018065985.1	1.2937	2.58962	2.22233	0.0320766	0.0320766	-3.70756	UP
XM_005680150.3	1.00134	-0.442122	2.22168	0.0321236	0.0321236	-3.53269	UP
MSTRG.5420.1	0.845301	1.19407	2.22089	0.0321819	0.0321819	-3.6402	NOT
XM_018048770.1	0.335484	3.38091	2.22086	0.0321841	0.0321841	-3.75875	NOT
MSTRG.6266.6	1.23903	0.44492	2.22069	0.0321962	0.0321962	-3.59749	UP
MSTRG.7129.1	1.07264	1.75778	2.22029	0.0322255	0.0322255	-3.64073	UP
XM_018058561.1	1.02233	2.27106	2.21906	0.0323157	0.0323157	-3.73167	UP
NM_001285628.1	-0.464113	2.6989	-2.21807	0.0323887	0.0323887	-3.68491	NOT
MSTRG.6478.5	-1.00723	1.81004	-2.21779	0.0324097	0.0324097	-3.58136	DOWN
XM_018066470.1	0.942167	2.22955	2.21742	0.0324369	0.0324369	-3.74435	NOT
XM_018048385.1	-1.1877	3.22926	-2.21723	0.0324506	0.0324506	-3.66929	DOWN
XM_018040606.1	-1.55394	2.86251	-2.21721	0.0324522	0.0324522	-3.63688	DOWN
XM_018039097.1	0.890001	-0.811143	2.21679	0.0324827	0.0324827	-3.52739	NOT
MSTRG.17301.1	0.968011	0.894266	2.21678	0.0324836	0.0324836	-3.59951	NOT
MSTRG.8637.1	0.371382	4.94506	2.21638	0.0325132	0.0325132	-3.8512	NOT
XM_018048703.1	0.540636	0.408426	2.21634	0.0325163	0.0325163	-3.53975	NOT
XM_018059446.1	1.36519	-0.364035	2.21602	0.0325403	0.0325403	-3.54418	UP
XM_018052669.1	0.591799	1.14876	2.21572	0.0325622	0.0325622	-3.59487	NOT
XM_018038925.1	-0.591174	6.9676	-2.21544	0.0325829	0.0325829	-3.87527	NOT
XM_018056878.1	-0.334446	5.84362	-2.21476	0.0326335	0.0326335	-3.86621	NOT
MSTRG.1082.9	-1.35718	-0.86271	-2.21475	0.0326337	0.0326337	-3.53114	DOWN
MSTRG.9606.2	0.951785	0.137372	2.21409	0.0326826	0.0326826	-3.53894	NOT
XM_018050650.1	1.4051	0.553443	2.21393	0.0326948	0.0326948	-3.58558	UP
XM_018052527.1	1.50483	1.23469	2.21219	0.0328238	0.0328238	-3.63052	UP
MSTRG.1234.10	-1.17456	-0.304984	-2.21211	0.0328301	0.0328301	-3.53556	DOWN
NM_001314219.1	-0.648234	5.32906	-2.21174	0.0328576	0.0328576	-3.84206	NOT
XM_018061409.1	0.415079	3.55423	2.21147	0.0328777	0.0328777	-3.79663	NOT
MSTRG.9482.4	-1.12329	0.434462	-2.21077	0.0329302	0.0329302	-3.56095	DOWN
XM_005690948.3	-0.682584	1.65874	-2.21076	0.0329307	0.0329307	-3.59018	NOT
XM_005682739.3	-0.993915	3.18688	-2.2102	0.0329728	0.0329728	-3.71088	NOT
MSTRG.6234.1	-1.63945	-0.132664	-2.20898	0.0330642	0.0330642	-3.54899	DOWN
MSTRG.5507.1	0.830769	0.702956	2.20839	0.0331081	0.0331081	-3.56495	NOT
XM_005680852.3	-0.828264	-0.0388519	-2.20839	0.0331082	0.0331082	-3.54133	NOT
XM_018042246.1	0.960377	1.48377	2.20824	0.0331198	0.0331198	-3.65386	NOT
XM_005680701.3	0.327547	2.84601	2.20781	0.0331518	0.0331518	-3.73015	NOT
XM_005676702.3	1.27484	-0.0586152	2.20763	0.0331651	0.0331651	-3.58385	UP
XM_005689989.3	0.906752	0.889269	2.20742	0.0331812	0.0331812	-3.61382	NOT
XM_018055148.1	0.418898	1.81004	2.20516	0.0333519	0.0333519	-3.64647	NOT
XM_013962706.2	0.364525	2.65417	2.20514	0.0333532	0.0333532	-3.70978	NOT
XM_018055430.1	0.783583	2.86332	2.20452	0.0333999	0.0333999	-3.77786	NOT
MSTRG.12776.3	1.18324	3.54793	2.20448	0.0334027	0.0334027	-3.88533	UP
XM_018040426.1	-1.27887	0.170874	-2.20206	0.0335868	0.0335868	-3.56476	DOWN
XM_005683251.2	-0.939311	0.714558	-2.20137	0.033639	0.033639	-3.56796	NOT
XM_005695775.3	1.1483	0.454943	2.20129	0.0336449	0.0336449	-3.57963	UP
XM_005695988.3	-0.31769	5.94938	-2.20102	0.0336659	0.0336659	-3.8944	NOT
XM_018060239.1	0.365734	1.26485	2.20065	0.0336938	0.0336938	-3.61805	NOT
XM_018059508.1	-1.15939	0.075684	-2.20065	0.0336938	0.0336938	-3.55401	DOWN
MSTRG.14396.1	0.437906	2.34394	2.20052	0.0337034	0.0337034	-3.6996	NOT
XM_018042501.1	0.726904	0.793056	2.19971	0.0337652	0.0337652	-3.60498	NOT
NM_001285671.1	-0.576946	7.86867	-2.19778	0.0339135	0.0339135	-3.918	NOT
MSTRG.17200.23	-3.02765	5.07408	-2.19684	0.0339852	0.0339852	-3.90279	DOWN
MSTRG.5529.8	1.81707	0.882875	2.19669	0.033997	0.033997	-3.72455	UP
XM_005684015.3	-0.869506	2.03326	-2.19664	0.0340007	0.0340007	-3.73079	NOT
XM_018052123.1	0.981608	0.462352	2.19663	0.0340018	0.0340018	-3.60061	NOT
MSTRG.11870.2	-1.41342	-0.809802	-2.19588	0.0340593	0.0340593	-3.56209	DOWN
XM_018043250.1	0.633157	4.34515	2.1956	0.0340805	0.0340805	-3.88004	NOT
XM_018063840.1	-0.309244	5.35043	-2.19556	0.0340839	0.0340839	-3.89504	NOT
XM_018040287.1	0.872867	0.913139	2.19515	0.0341156	0.0341156	-3.60683	NOT
MSTRG.8325.4	-1.12268	-0.498353	-2.19507	0.0341217	0.0341217	-3.56595	DOWN
XM_018066348.1	-1.11447	0.610051	-2.19501	0.0341267	0.0341267	-3.59874	DOWN
MSTRG.1153.2	0.520123	2.00103	2.19457	0.0341604	0.0341604	-3.66307	NOT
XM_018067079.1	0.547668	3.83061	2.19429	0.0341819	0.0341819	-3.85375	NOT
XM_013966676.2	0.764224	0.9532	2.19413	0.0341941	0.0341941	-3.62619	NOT
XM_005684947.2	-0.267359	5.89345	-2.19405	0.0342003	0.0342003	-3.90338	NOT
XM_018045144.1	0.678344	3.61084	2.19379	0.0342207	0.0342207	-3.86075	NOT
XR_001917322.1	0.942283	-0.576087	2.19379	0.0342207	0.0342207	-3.56575	NOT
XM_018066314.1	0.315265	3.06265	2.19377	0.0342221	0.0342221	-3.77172	NOT
XM_018040497.1	0.792642	0.673851	2.19368	0.034229	0.034229	-3.59174	NOT
XM_018046130.1	-1.10881	0.208481	-2.19348	0.0342444	0.0342444	-3.57687	DOWN
XM_018056599.1	0.557817	0.696967	2.19301	0.0342805	0.0342805	-3.60032	NOT
MSTRG.4869.1	0.440855	4.13941	2.19245	0.034324	0.034324	-3.87364	NOT
MSTRG.5860.1	-1.23855	0.187187	-2.19245	0.0343246	0.0343246	-3.58057	DOWN
XM_018046101.1	0.871614	0.971427	2.19243	0.0343261	0.0343261	-3.64471	NOT
XM_018056372.1	0.362059	2.05048	2.19223	0.034341	0.034341	-3.70109	NOT
MSTRG.5940.5	0.509944	1.01892	2.1922	0.0343437	0.0343437	-3.63663	NOT
XM_005683223.3	-0.385218	0.819996	-2.19182	0.0343729	0.0343729	-3.5925	NOT
MSTRG.5257.3	0.743993	1.64561	2.1916	0.0343898	0.0343898	-3.66999	NOT
XM_018040186.1	0.641422	0.551603	2.1916	0.0343906	0.0343906	-3.59886	NOT
MSTRG.5619.5	1.1138	0.369373	2.19136	0.0344086	0.0344086	-3.59294	UP
XM_018047073.1	-0.70583	1.47999	-2.19136	0.0344091	0.0344091	-3.64052	NOT
XR_001918676.1	-0.374685	5.73386	-2.19131	0.0344124	0.0344124	-3.90607	NOT
XM_018057652.1	-0.714138	0.699329	-2.19057	0.0344706	0.0344706	-3.58169	NOT
MSTRG.7995.1	-2.5858	0.929227	-2.1903	0.0344914	0.0344914	-3.58315	DOWN
MSTRG.3413.1	0.528203	2.83465	2.19013	0.0345044	0.0345044	-3.73825	NOT
XM_018050544.1	1.02405	0.147373	2.18991	0.0345219	0.0345219	-3.57693	UP
MSTRG.120.4	0.430503	1.52281	2.18953	0.0345513	0.0345513	-3.65244	NOT
MSTRG.3657.4	-0.985943	0.450072	-2.18896	0.0345957	0.0345957	-3.58354	NOT
MSTRG.8429.2	0.992909	2.81141	2.18831	0.0346461	0.0346461	-3.77425	NOT
XM_013967208.2	-1.07145	-0.435792	-2.18804	0.0346677	0.0346677	-3.57555	DOWN
MSTRG.10063.1	0.560608	4.0977	2.18804	0.0346679	0.0346679	-3.87391	NOT
MSTRG.1369.1	-1.24423	-0.197604	-2.18774	0.0346912	0.0346912	-3.57422	DOWN
MSTRG.9295.5	0.769272	2.63694	2.18731	0.0347243	0.0347243	-3.78865	NOT
XM_018062793.1	-1.173	3.7455	-2.18725	0.0347292	0.0347292	-3.80662	DOWN
MSTRG.1256.1	-1.00869	1.26122	-2.18668	0.0347742	0.0347742	-3.70687	DOWN
XM_005689178.3	-0.440478	3.13237	-2.18656	0.0347838	0.0347838	-3.77418	NOT
XM_018050630.1	-0.774242	1.27152	-2.18623	0.0348096	0.0348096	-3.62379	NOT
XM_018056354.1	-0.386028	3.82016	-2.18547	0.0348691	0.0348691	-3.85281	NOT
XM_018063565.1	-1.18809	1.64893	-2.18527	0.0348845	0.0348845	-3.69279	DOWN
MSTRG.13095.2	1.21725	-0.323869	2.18506	0.0349014	0.0349014	-3.58676	UP
XM_018067164.1	-0.476432	4.20531	-2.18464	0.034934	0.034934	-3.86083	NOT
MSTRG.13502.3	-1.00768	-0.300087	-2.18451	0.0349444	0.0349444	-3.57864	DOWN
XM_018047881.1	0.499686	4.20966	2.18423	0.0349666	0.0349666	-3.883	NOT
MSTRG.9245.4	0.734752	0.631762	2.18404	0.0349818	0.0349818	-3.62043	NOT
MSTRG.6504.3	-1.14935	-0.765902	-2.18398	0.0349861	0.0349861	-3.57994	DOWN
XM_018043752.1	0.927267	-0.130267	2.18396	0.0349883	0.0349883	-3.60183	NOT
MSTRG.3282.3	-1.31674	0.466652	-2.18385	0.0349965	0.0349965	-3.59472	DOWN
XM_005691668.3	-0.413516	9.81398	-2.1833	0.03504	0.03504	-3.9606	NOT
MSTRG.11504.6	1.01212	1.55498	2.18316	0.0350508	0.0350508	-3.7373	UP
XM_018041898.1	-0.447194	4.58357	-2.18304	0.0350606	0.0350606	-3.89607	NOT
MSTRG.17224.1	0.356922	1.74181	2.18287	0.0350741	0.0350741	-3.69082	NOT
MSTRG.13364.2	1.09888	0.733834	2.18263	0.0350926	0.0350926	-3.64614	UP
XM_005686816.3	-0.622316	1.83779	-2.18149	0.0351828	0.0351828	-3.68508	NOT
XM_018066247.1	0.791895	0.269598	2.18106	0.0352173	0.0352173	-3.61039	NOT
XM_005691356.3	-0.288088	2.84512	-2.18027	0.0352799	0.0352799	-3.77014	NOT
XM_018060932.1	0.815278	0.0541693	2.1802	0.0352855	0.0352855	-3.5976	NOT
XM_018063749.1	-0.943079	-0.0299377	-2.17963	0.0353305	0.0353305	-3.58699	NOT
XM_018049191.1	-0.566743	1.84148	-2.17938	0.0353507	0.0353507	-3.70211	NOT
MSTRG.9492.16	1.01683	0.672186	2.17934	0.0353538	0.0353538	-3.64768	UP
XM_018056738.1	-0.715848	1.90365	-2.17871	0.0354038	0.0354038	-3.68962	NOT
MSTRG.3079.1	-0.783542	0.103464	-2.17802	0.0354594	0.0354594	-3.59476	NOT
MSTRG.11930.6	0.529016	2.89825	2.1777	0.0354845	0.0354845	-3.82895	NOT
XR_001918198.1	0.643796	6.08803	2.17663	0.0355698	0.0355698	-3.94536	NOT
MSTRG.13779.1	0.911079	1.0136	2.1763	0.0355966	0.0355966	-3.67316	NOT
XM_005699581.3	0.584285	3.64178	2.17597	0.0356229	0.0356229	-3.87884	NOT
XM_018043923.1	-0.440898	5.04008	-2.17581	0.0356358	0.0356358	-3.91932	NOT
XM_018045131.1	0.596812	3.42011	2.17543	0.035666	0.035666	-3.89982	NOT
XM_018043237.1	0.995659	-0.415522	2.17458	0.0357345	0.0357345	-3.60264	NOT
MSTRG.13260.1	-0.550866	1.42303	-2.17425	0.0357612	0.0357612	-3.69048	NOT
XM_018065023.1	0.345163	4.26509	2.17415	0.0357688	0.0357688	-3.90784	NOT
XM_018041909.1	0.877373	0.221376	2.17398	0.0357823	0.0357823	-3.62352	NOT
MSTRG.8297.1	0.554222	2.86586	2.1738	0.0357968	0.0357968	-3.88049	NOT
XM_005690906.3	-0.374656	4.15013	-2.17377	0.0357996	0.0357996	-3.88691	NOT
XM_018053313.1	-0.57056	2.62993	-2.17376	0.0357999	0.0357999	-3.7304	NOT
MSTRG.10783.1	-0.57635	0.926302	-2.17355	0.0358173	0.0358173	-3.62715	NOT
XM_018045867.1	0.75609	0.877509	2.17332	0.0358357	0.0358357	-3.64889	NOT
MSTRG.14123.8	0.540771	2.90822	2.17306	0.0358563	0.0358563	-3.84201	NOT
XM_018064963.1	0.406819	4.16109	2.17246	0.0359054	0.0359054	-3.9064	NOT
XM_018051292.1	0.79728	0.897157	2.17229	0.0359183	0.0359183	-3.64232	NOT
XM_013975550.2	-0.918274	1.30905	-2.17197	0.0359445	0.0359445	-3.65922	NOT
XM_018051244.1	1.10379	0.0348236	2.17184	0.0359547	0.0359547	-3.62629	UP
MSTRG.2273.7	-0.869966	0.966178	-2.17182	0.0359567	0.0359567	-3.63672	NOT
XM_018049263.1	-0.337179	3.14774	-2.17174	0.0359633	0.0359633	-3.8059	NOT
MSTRG.3566.1	2.28726	2.52544	2.17147	0.0359847	0.0359847	-3.81308	UP
XM_018061313.1	0.744646	0.872217	2.17133	0.035996	0.035996	-3.66503	NOT
XM_005688286.3	-0.441966	8.85532	-2.17126	0.0360023	0.0360023	-3.97628	NOT
XM_018060228.1	0.927748	-0.926375	2.17089	0.0360316	0.0360316	-3.60086	NOT
XM_018064310.1	-1.01317	0.439901	-2.17088	0.0360327	0.0360327	-3.62255	DOWN
XR_001295902.2	-0.770403	0.00152894	-2.17074	0.0360437	0.0360437	-3.60352	NOT
MSTRG.13814.1	0.937756	2.11936	2.17071	0.0360462	0.0360462	-3.75855	NOT
XM_005688175.2	-0.375242	2.14746	-2.17002	0.0361024	0.0361024	-3.71816	NOT
XM_018043684.1	1.46346	0.789316	2.16981	0.0361192	0.0361192	-3.69842	UP
XM_005676261.3	-1.58484	0.851909	-2.16952	0.0361425	0.0361425	-3.63544	DOWN
MSTRG.11086.3	0.571222	4.35582	2.16942	0.0361511	0.0361511	-3.93019	NOT
MSTRG.5698.5	-1.44445	-0.69132	-2.16939	0.0361537	0.0361537	-3.60732	DOWN
XM_018057792.1	0.318886	3.38502	2.1693	0.0361606	0.0361606	-3.85862	NOT
XM_018055302.1	0.96785	0.889613	2.16908	0.0361786	0.0361786	-3.66813	NOT
MSTRG.12920.1	-0.335541	1.90056	-2.16881	0.0362002	0.0362002	-3.70331	NOT
XM_018044927.1	1.01795	-0.512724	2.16835	0.0362378	0.0362378	-3.60862	UP
XM_018050985.1	0.839234	1.23844	2.16831	0.0362416	0.0362416	-3.70154	NOT
XM_018058531.1	0.892359	0.53989	2.16811	0.0362578	0.0362578	-3.64832	NOT
XR_001918898.1	0.467061	1.79151	2.16776	0.0362861	0.0362861	-3.71733	NOT
MSTRG.11981.2	-0.668792	1.00834	-2.16755	0.0363034	0.0363034	-3.63333	NOT
MSTRG.1543.5	-1.22106	-0.808592	-2.1671	0.0363394	0.0363394	-3.60722	DOWN
XM_005689839.2	-0.658677	0.569554	-2.16691	0.0363551	0.0363551	-3.6219	NOT
XM_005686007.3	0.345412	2.43044	2.16673	0.0363697	0.0363697	-3.76514	NOT
XM_005697399.3	-0.597035	4.42527	-2.16644	0.0363937	0.0363937	-3.91308	NOT
MSTRG.17941.1	-2.26885	0.573113	-2.16597	0.036432	0.036432	-3.62037	DOWN
XM_018053411.1	0.867312	1.10766	2.16568	0.0364553	0.0364553	-3.65878	NOT
XM_018062572.1	0.94718	2.18354	2.1656	0.0364625	0.0364625	-3.79419	NOT
XM_018038729.1	0.719136	1.57084	2.1655	0.0364706	0.0364706	-3.71829	NOT
XM_018050836.1	0.950524	-0.0441391	2.16527	0.0364888	0.0364888	-3.64036	NOT
MSTRG.17717.1	0.402783	0.930362	2.16434	0.036565	0.036565	-3.66269	NOT
MSTRG.17322.1	-0.455626	2.33818	-2.16423	0.0365744	0.0365744	-3.75682	NOT
XM_018045961.1	1.05415	-0.104057	2.16288	0.0366851	0.0366851	-3.62506	UP
MSTRG.1424.2	0.56696	2.9103	2.16285	0.0366873	0.0366873	-3.82376	NOT
XM_005686797.3	1.77283	2.83508	2.16274	0.0366965	0.0366965	-3.86151	UP
XM_018062347.1	-1.29125	0.0844281	-2.16249	0.0367171	0.0367171	-3.6192	DOWN
XM_018047311.1	1.03576	-0.0211622	2.1621	0.0367496	0.0367496	-3.6174	UP
XM_018061335.1	0.528712	4.55824	2.16197	0.0367602	0.0367602	-3.94696	NOT
XM_018039716.1	-0.867493	-0.0186615	-2.16172	0.0367803	0.0367803	-3.61661	NOT
XR_001296701.2	0.582185	2.55354	2.16169	0.0367835	0.0367835	-3.78106	NOT
MSTRG.4691.12	-1.2635	-0.607376	-2.16163	0.0367881	0.0367881	-3.61612	DOWN
MSTRG.4926.1	0.582729	0.690079	2.16153	0.0367961	0.0367961	-3.65093	NOT
MSTRG.11961.5	0.590035	0.464895	2.16111	0.0368308	0.0368308	-3.64495	NOT
XR_001917470.1	-1.00779	-0.520521	-2.16097	0.0368428	0.0368428	-3.61621	DOWN
XM_018051198.1	0.926923	1.0285	2.16066	0.0368682	0.0368682	-3.70979	NOT
XM_013974033.2	-1.01685	2.80618	-2.15992	0.0369295	0.0369295	-3.89052	DOWN
MSTRG.15201.1	0.902427	3.77327	2.1598	0.0369396	0.0369396	-3.9274	NOT
XM_018061396.1	0.926093	-0.436414	2.15975	0.0369432	0.0369432	-3.62953	NOT
XM_018060020.1	1.03102	-0.264994	2.15953	0.0369617	0.0369617	-3.62813	UP
XR_001295858.2	0.772186	0.258412	2.15938	0.0369742	0.0369742	-3.65087	NOT
MSTRG.5940.1	0.262222	3.05622	2.15932	0.0369787	0.0369787	-3.85886	NOT
XM_005688875.3	-0.384864	1.49699	-2.15867	0.0370326	0.0370326	-3.68917	NOT
XM_018040373.1	1.28612	1.44595	2.158	0.0370886	0.0370886	-3.70736	UP
MSTRG.1890.7	0.947076	0.392019	2.15787	0.0370995	0.0370995	-3.63633	NOT
XM_018060984.1	0.712424	5.09428	2.15768	0.037115	0.037115	-3.96714	NOT
MSTRG.12923.1	0.299429	3.1188	2.15709	0.037164	0.037164	-3.86542	NOT
MSTRG.16763.1	-1.07048	1.54613	-2.15703	0.0371693	0.0371693	-3.67593	DOWN
MSTRG.9014.1	0.663481	0.746262	2.15695	0.0371756	0.0371756	-3.67652	NOT
MSTRG.17011.1	0.407356	2.30625	2.15623	0.0372357	0.0372357	-3.81024	NOT
XM_013968024.2	0.639729	0.452715	2.15568	0.0372813	0.0372813	-3.65002	NOT
MSTRG.14362.33	-1.05168	-0.402023	-2.15537	0.0373069	0.0373069	-3.62524	DOWN
XM_018061007.1	0.667926	1.14731	2.15536	0.0373081	0.0373081	-3.70314	NOT
XM_018055868.1	0.850059	1.02684	2.15534	0.0373095	0.0373095	-3.72285	NOT
XM_005691140.3	-1.21378	0.00465381	-2.15465	0.0373672	0.0373672	-3.64883	DOWN
XM_018059794.1	-0.927808	0.544932	-2.15443	0.0373856	0.0373856	-3.6473	NOT
XM_018040414.1	-0.993757	2.70481	-2.15438	0.0373902	0.0373902	-3.81552	NOT
XM_018050772.1	0.549287	2.67738	2.15361	0.0374547	0.0374547	-3.80919	NOT
XM_018061370.1	0.948118	0.721735	2.15303	0.0375033	0.0375033	-3.70986	NOT
XM_018049966.1	1.02964	1.65724	2.15283	0.0375201	0.0375201	-3.78197	UP
XM_018042625.1	0.974905	0.975219	2.15279	0.0375234	0.0375234	-3.68895	NOT
XM_018054803.1	0.396795	2.84557	2.15234	0.0375608	0.0375608	-3.81891	NOT
XM_018041590.1	-0.836778	1.354	-2.15188	0.0375999	0.0375999	-3.68605	NOT
MSTRG.10179.38	-1.44846	-0.319094	-2.15176	0.0376095	0.0376095	-3.63545	DOWN
XM_018046246.1	0.91807	0.0309151	2.15175	0.0376101	0.0376101	-3.63633	NOT
MSTRG.17481.1	1.39126	2.384	2.15104	0.0376698	0.0376698	-3.8503	UP
MSTRG.17728.2	0.553139	1.15552	2.15087	0.037684	0.037684	-3.71643	NOT
XM_018059685.1	0.79749	1.46668	2.15078	0.0376919	0.0376919	-3.74769	NOT
XM_018065051.1	-0.828106	0.941596	-2.15064	0.0377037	0.0377037	-3.66499	NOT
MSTRG.10375.1	0.7616	0.528753	2.15042	0.0377226	0.0377226	-3.68679	NOT
MSTRG.12159.1	-0.918641	-0.0453114	-2.15042	0.0377226	0.0377226	-3.63741	NOT
XM_018059699.1	1.11196	0.210679	2.15027	0.037735	0.037735	-3.68151	UP
XM_005691996.3	-0.280969	3.23641	-2.15026	0.0377359	0.0377359	-3.85189	NOT
XM_005680810.3	-0.303491	4.82826	-2.14989	0.0377667	0.0377667	-3.97088	NOT
XM_018048572.1	-0.944624	-0.0524	-2.14958	0.0377929	0.0377929	-3.63913	NOT
XM_013969606.2	0.637338	1.76313	2.14923	0.0378231	0.0378231	-3.75506	NOT
XM_005693979.3	0.243472	3.99897	2.14897	0.0378446	0.0378446	-3.93453	NOT
XM_018053927.1	0.449095	4.64226	2.14883	0.0378565	0.0378565	-3.96639	NOT
MSTRG.12206.2	0.68201	2.2078	2.14871	0.0378665	0.0378665	-3.80778	NOT
MSTRG.13823.6	0.617138	2.11751	2.1484	0.0378931	0.0378931	-3.79963	NOT
XM_018064490.1	1.23769	0.405673	2.14827	0.0379035	0.0379035	-3.71492	UP
XM_018048810.1	-0.426241	5.38163	-2.14758	0.0379625	0.0379625	-3.98441	NOT
XM_018057413.1	0.319726	1.79346	2.14713	0.0380001	0.0380001	-3.74456	NOT
XM_018060838.1	-0.397393	1.36727	-2.14684	0.0380252	0.0380252	-3.7079	NOT
MSTRG.3665.4	0.785629	0.297102	2.14679	0.0380296	0.0380296	-3.67338	NOT
XM_005686936.2	-0.408631	4.30874	-2.14672	0.0380352	0.0380352	-3.94503	NOT
XM_018039780.1	-0.786766	1.38082	-2.1466	0.0380456	0.0380456	-3.67256	NOT
MSTRG.14340.9	-1.22786	-0.279771	-2.14652	0.0380524	0.0380524	-3.64136	DOWN
XM_018056364.1	0.533219	5.55596	2.14633	0.0380687	0.0380687	-3.99484	NOT
XM_005684149.3	0.536463	0.487388	2.14602	0.0380951	0.0380951	-3.70525	NOT
XM_018063697.1	0.872225	0.167663	2.14588	0.0381067	0.0381067	-3.65734	NOT
MSTRG.9092.16	1.00828	-0.60491	2.14586	0.0381087	0.0381087	-3.64572	UP
MSTRG.12007.1	0.459551	4.3112	2.14578	0.0381154	0.0381154	-3.97542	NOT
XM_018065766.1	-0.301293	3.46692	-2.14498	0.0381835	0.0381835	-3.89866	NOT
XM_018038391.1	-0.416297	3.68318	-2.14495	0.038186	0.038186	-3.94855	NOT
XM_018052437.1	-0.594541	0.897869	-2.14471	0.0382058	0.0382058	-3.69537	NOT
MSTRG.8302.20	1.26844	0.10181	2.14456	0.0382187	0.0382187	-3.67743	UP
MSTRG.7781.1	0.824928	1.03327	2.14393	0.0382726	0.0382726	-3.72046	NOT
XM_018049372.1	0.272586	4.53619	2.14371	0.0382913	0.0382913	-3.96959	NOT
XM_018062679.1	1.04536	2.31664	2.14346	0.038313	0.038313	-3.84109	UP
XM_005687456.3	0.840336	0.185209	2.14297	0.0383547	0.0383547	-3.67187	NOT
XM_018047229.1	-0.220373	5.18184	-2.14208	0.0384313	0.0384313	-3.99088	NOT
MSTRG.8994.1	0.448076	1.41649	2.14186	0.03845	0.03845	-3.73203	NOT
XM_005677205.3	-0.59153	2.10951	-2.14171	0.038463	0.038463	-3.7574	NOT
XM_013972431.2	-1.06142	0.944185	-2.14159	0.0384727	0.0384727	-3.67028	DOWN
XM_005682415.2	-0.372077	3.75305	-2.14151	0.0384796	0.0384796	-3.91711	NOT
XM_005697656.3	0.490401	7.58702	2.14151	0.0384801	0.0384801	-4.03021	NOT
MSTRG.10320.1	0.644513	2.06281	2.14116	0.03851	0.03851	-3.79303	NOT
XM_018039971.1	-0.309478	4.33065	-2.14091	0.0385316	0.0385316	-3.96206	NOT
XM_018041490.1	0.358383	2.61043	2.14062	0.0385558	0.0385558	-3.8229	NOT
MSTRG.1863.8	0.444758	0.845974	2.14044	0.0385712	0.0385712	-3.70092	NOT
XM_018043675.1	0.415593	1.95287	2.13997	0.0386117	0.0386117	-3.78466	NOT
MSTRG.17826.20	3.13605	-0.414936	2.13992	0.0386162	0.0386162	-3.68728	UP
XM_018056073.1	0.964418	-0.0263107	2.13908	0.0386884	0.0386884	-3.66726	NOT
XM_018055654.1	0.246291	3.84948	2.1389	0.0387046	0.0387046	-3.95517	NOT
MSTRG.12522.8	0.819993	2.90417	2.13877	0.0387155	0.0387155	-3.88889	NOT
MSTRG.9491.2	0.553887	2.79822	2.13871	0.0387202	0.0387202	-3.85141	NOT
XM_018048513.1	1.04712	0.595881	2.13866	0.0387245	0.0387245	-3.67746	UP
XM_018061088.1	0.540047	2.46017	2.13845	0.0387428	0.0387428	-3.84165	NOT
XM_018049563.1	0.741337	0.589324	2.1381	0.0387732	0.0387732	-3.70554	NOT
MSTRG.2739.2	-1.22061	3.33071	-2.13778	0.0388011	0.0388011	-3.89323	DOWN
MSTRG.2405.1	-0.831016	2.27499	-2.13754	0.0388218	0.0388218	-3.91193	NOT
XM_018042052.1	-0.425125	2.84879	-2.1373	0.0388427	0.0388427	-3.82431	NOT
MSTRG.3987.1	0.435385	1.8641	2.13667	0.0388972	0.0388972	-3.77012	NOT
XM_018048438.1	-0.910254	2.94908	-2.13634	0.0389256	0.0389256	-3.80771	NOT
[truncated: 24,094 more rows]

## Sheet: ELvsDP
ID	logFC	AveExpr	t	P.Value	adj.P.Val	B	change
MSTRG.3159.2	9.46603	7.78326	12.5432	2.49892e-15	5.34219e-11	24.6774	UP
MSTRG.13941.5	7.43813	5.18563	12.3485	4.09473e-15	5.34219e-11	23.99	UP
NM_001285635.1	10.0916	13.5232	11.7518	1.91625e-14	1.66669e-10	22.817	UP
XM_013964674.2	8.24643	7.49093	11.4516	4.23677e-14	2.76375e-10	21.9856	UP
MSTRG.4265.1	4.23292	1.39238	11.3436	5.65243e-14	2.94978e-10	21.3352	UP
XM_013966067.2	5.01346	6.19693	11.2463	7.33751e-14	3.19096e-10	21.4704	UP
XM_013964677.2	8.3333	7.3633	11.1777	8.82653e-14	3.29015e-10	21.2717	UP
XM_018042469.1	5.13956	2.50811	10.8053	2.43228e-13	7.9332e-10	20.0259	UP
NM_001285619.1	5.85257	7.51892	10.754	2.80069e-13	8.11983e-10	20.1786	UP
NM_001285585.1	10.09	13.1143	10.6578	3.6512e-13	9.52706e-10	19.9213	UP
XM_018044830.1	3.85346	0.600222	10.5947	4.3485e-13	1.0315e-09	19.3594	UP
XM_018046468.1	4.34916	4.17184	10.4746	6.07294e-13	1.26471e-09	19.3623	UP
NM_001285618.1	8.44743	6.80609	10.4614	6.30102e-13	1.26471e-09	19.3289	UP
XM_005690491.3	3.91094	4.38569	10.4132	7.20999e-13	1.34379e-09	19.2099	UP
MSTRG.12544.1	3.55966	3.21943	10.3693	8.15286e-13	1.41822e-09	19.0498	UP
XM_018046457.1	2.9903	5.05156	10.2653	1.09185e-12	1.76335e-09	18.8401	UP
XM_013964675.2	7.54704	9.48102	10.2472	1.14885e-12	1.76335e-09	18.7949	UP
XM_018065015.1	1.95964	5.18827	10.0347	2.09751e-12	3.04058e-09	18.2046	UP
MSTRG.8297.1	2.9222	2.86586	9.97283	2.50167e-12	3.27445e-09	17.9709	UP
MSTRG.3456.1	3.3904	2.61408	9.96658	2.54673e-12	3.27445e-09	17.9186	UP
XM_005681721.2	8.94589	15.6759	9.94128	2.73753e-12	3.27445e-09	17.9346	UP
MSTRG.10564.1	4.75441	1.48059	9.93832	2.76081e-12	3.27445e-09	17.7111	UP
MSTRG.9226.7	3.02107	0.372551	9.82502	3.81978e-12	4.33345e-09	17.306	UP
MSTRG.261.3	4.43692	1.33646	9.77191	4.45031e-12	4.83842e-09	17.2489	UP
MSTRG.12722.2	5.88662	3.67534	9.71681	5.21657e-12	5.31473e-09	17.2404	UP
XM_005696526.3	-1.8114	8.50597	-9.70294	5.42966e-12	5.31473e-09	17.2652	DOWN
XM_018045896.1	5.86691	2.62791	9.69852	5.49947e-12	5.31473e-09	17.0878	UP
XM_018060890.1	3.7972	2.71339	9.66857	5.99694e-12	5.5885e-09	17.0867	UP
XM_005700118.3	2.68333	7.1093	9.65018	6.32477e-12	5.69077e-09	17.1179	UP
MSTRG.12143.1	2.68481	2.46139	9.6304	6.69779e-12	5.82552e-09	17.0145	UP
XM_013964676.2	8.19562	5.59553	9.56205	8.16722e-12	6.87443e-09	16.8341	UP
XM_018047030.1	2.80535	1.09082	9.39137	1.34379e-11	1.07706e-08	16.1713	UP
XM_005681484.3	6.44806	3.91705	9.38673	1.36216e-11	1.07706e-08	16.2966	UP
XR_001296971.2	5.2593	2.49722	9.26437	1.95104e-11	1.49731e-08	15.889	UP
MSTRG.10698.5	3.07064	2.31596	9.25421	2.01033e-11	1.49873e-08	15.9268	UP
MSTRG.10304.1	3.09779	2.18639	9.23613	2.12033e-11	1.53682e-08	15.8743	UP
MSTRG.3160.1	5.65903	2.68907	9.1938	2.40239e-11	1.6942e-08	15.6992	UP
MSTRG.15644.1	4.19695	1.97599	9.16145	2.64334e-11	1.77675e-08	15.5964	UP
XM_013964699.2	7.83877	10.8205	9.15988	2.65563e-11	1.77675e-08	15.6984	UP
MSTRG.4189.1	9.12403	7.40347	9.10415	3.13202e-11	2.04309e-08	15.5566	UP
MSTRG.9226.2	2.98893	1.04563	9.02144	4.00373e-11	2.54803e-08	15.1178	UP
XM_018054688.1	5.98244	12.3814	9.00439	4.21208e-11	2.6168e-08	15.2383	UP
NM_001285626.1	8.68899	12.552	8.92815	5.28682e-11	3.20812e-08	15.0135	UP
MSTRG.6972.1	4.03497	1.77489	8.87614	6.17594e-11	3.66247e-08	14.7716	UP
XM_005696209.3	-1.92237	5.21238	-8.86608	6.36453e-11	3.69044e-08	14.8545	DOWN
XM_005681579.2	3.22246	0.523032	8.84144	6.85205e-11	3.88675e-08	14.6036	UP
MSTRG.3054.3	8.56579	7.2132	8.7916	7.95661e-11	4.41727e-08	14.6456	UP
XM_005692524.3	1.93208	3.80708	8.71701	9.95657e-11	5.25456e-08	14.427	UP
MSTRG.6965.1	3.47721	1.96359	8.70861	1.02115e-10	5.25456e-08	14.3281	UP
XM_018056257.1	4.40427	2.38818	8.70806	1.02286e-10	5.25456e-08	14.3252	UP
NM_001285607.1	5.32276	2.92013	8.70671	1.02703e-10	5.25456e-08	14.341	UP
XM_018054153.1	2.47262	3.39803	8.65716	1.19249e-10	5.98376e-08	14.2526	UP
XM_005699771.2	6.38909	6.10735	8.64727	1.22862e-10	6.04877e-08	14.2243	UP
XM_018040428.1	2.79571	0.319431	8.63995	1.25608e-10	6.06942e-08	14.0376	UP
MSTRG.13101.1	2.95758	0.94544	8.59007	1.46045e-10	6.92864e-08	13.905	UP
XM_018040432.1	2.13433	2.98435	8.54751	1.66132e-10	7.67649e-08	13.9291	UP
MSTRG.4188.27	9.58423	6.29123	8.54443	1.67692e-10	7.67649e-08	13.9051	UP
XM_018058988.1	2.80177	3.89108	8.53455	1.72789e-10	7.77341e-08	13.8911	UP
XM_018054687.1	6.09289	5.68155	8.46445	2.13768e-10	9.45398e-08	13.6847	UP
XM_018061285.1	4.65213	3.36368	8.43168	2.36176e-10	1.02709e-07	13.5768	UP
MSTRG.6517.1	2.84149	0.682649	8.38021	2.7627e-10	1.18176e-07	13.2952	UP
XM_018063559.1	8.33367	3.88978	8.37189	2.83367e-10	1.19257e-07	13.3616	UP
XM_013963496.2	3.23154	1.9038	8.3596	2.94194e-10	1.21848e-07	13.3482	UP
MSTRG.10039.1	3.35783	1.25644	8.33232	3.19748e-10	1.30362e-07	13.2089	UP
MSTRG.3054.2	8.7552	7.27785	8.27652	3.7923e-10	1.52235e-07	13.1248	UP
XM_018064792.1	3.91522	4.32048	8.26621	3.91393e-10	1.54737e-07	13.0963	UP
XM_018060657.1	3.24275	1.23294	8.23876	4.25724e-10	1.64741e-07	12.9246	UP
MSTRG.4188.14	9.89357	6.22632	8.23602	4.29327e-10	1.64741e-07	13.005	UP
XM_018051682.1	3.61022	0.482962	8.22049	4.50259e-10	1.69733e-07	12.8751	UP
XM_005677433.3	1.02488	4.44716	8.21236	4.61623e-10	1.69733e-07	12.9104	UP
MSTRG.1651.2	3.92993	1.63721	8.2122	4.61848e-10	1.69733e-07	12.875	UP
MSTRG.4188.18	7.49568	5.20295	8.19503	4.86845e-10	1.74268e-07	12.8818	UP
NM_001285701.1	6.51557	8.01947	8.19237	4.90838e-10	1.74268e-07	12.8397	UP
MSTRG.7223.1	3.0947	0.320254	8.18952	4.95142e-10	1.74268e-07	12.7413	UP
MSTRG.5941.2	3.77819	0.628674	8.18575	5.00905e-10	1.74268e-07	12.765	UP
XM_018049130.1	8.5951	9.40629	8.14358	5.70219e-10	1.95773e-07	12.6793	UP
MSTRG.4189.2	12.7281	6.8724	8.13914	5.78047e-10	1.95883e-07	12.7003	UP
XM_005699772.3	5.07986	5.76236	8.13319	5.88732e-10	1.96946e-07	12.6929	UP
MSTRG.1962.1	3.81329	1.16537	8.11018	6.31936e-10	2.08723e-07	12.55	UP
XM_018042022.1	2.81707	4.89001	8.10466	6.4276e-10	2.09644e-07	12.5917	UP
XM_013964673.2	10.6196	7.59476	8.02305	8.26687e-10	2.6417e-07	12.3653	UP
MSTRG.7473.1	1.75916	2.8626	8.02102	8.31881e-10	2.6417e-07	12.3633	UP
XM_018064366.1	3.34543	3.1685	8.01776	8.40305e-10	2.6417e-07	12.3544	UP
MSTRG.12776.3	5.32507	3.54793	8.01319	8.52266e-10	2.6474e-07	12.3407	UP
MSTRG.13732.2	3.14837	0.470635	7.99021	9.14962e-10	2.79302e-07	12.1939	UP
XM_018043425.1	3.05403	1.60908	7.98824	9.20551e-10	2.79302e-07	12.2309	UP
XM_005675093.3	-2.2208	6.18308	-7.9812	9.40811e-10	2.82168e-07	12.191	DOWN
MSTRG.15350.1	3.02553	0.806797	7.96047	1.00313e-09	2.97439e-07	12.0755	UP
NM_001314219.1	-2.2288	5.32906	-7.94916	1.03887e-09	3.04576e-07	12.1064	DOWN
MSTRG.17103.1	2.74418	1.42237	7.93437	1.08753e-09	3.153e-07	12.0545	UP
XM_018053100.1	1.06168	4.42557	7.90978	1.17363e-09	3.36522e-07	11.9927	UP
MSTRG.9665.4	2.72075	1.35319	7.89228	1.23907e-09	3.51425e-07	11.9337	UP
XM_018053912.1	1.36115	5.16575	7.87273	1.31654e-09	3.69383e-07	11.8682	UP
MSTRG.7222.1	3.28132	6.2316	7.86912	1.33136e-09	3.69566e-07	11.8512	UP
MSTRG.12344.2	1.86561	3.60347	7.85227	1.40284e-09	3.8531e-07	11.85	UP
XM_013962421.2	-1.6323	2.91582	-7.82677	1.51848e-09	4.11047e-07	11.7804	DOWN
XM_013964678.2	7.48409	5.70652	7.8245	1.52924e-09	4.11047e-07	11.7692	UP
XM_013966434.2	3.0855	0.531958	7.82103	1.54583e-09	4.11047e-07	11.6775	UP
XM_005677120.3	2.21353	3.83321	7.81615	1.56947e-09	4.11047e-07	11.7374	UP
XM_018053664.1	2.05146	3.87339	7.81445	1.57776e-09	4.11047e-07	11.7179	UP
XM_005677496.2	-1.85376	3.8711	-7.81175	1.59107e-09	4.11047e-07	11.7131	DOWN
XM_005685044.3	1.74807	4.90191	7.79861	1.65742e-09	4.2399e-07	11.647	UP
XM_005699882.3	2.05385	4.19933	7.76334	1.84969e-09	4.65654e-07	11.5677	UP
XM_018051882.1	2.07357	5.82187	7.76225	1.85598e-09	4.65654e-07	11.5245	UP
XM_005687695.3	3.95205	1.50749	7.75766	1.88274e-09	4.67869e-07	11.5438	UP
XM_013964700.2	6.65056	3.12391	7.75004	1.92796e-09	4.74587e-07	11.5329	UP
XM_005678362.3	3.39083	6.08972	7.73662	2.01027e-09	4.90225e-07	11.4569	UP
NM_001287029.1	-1.1988	10.2804	-7.69949	2.25704e-09	5.40773e-07	11.3073	DOWN
XM_018051284.1	3.42997	0.359056	7.69921	2.25901e-09	5.40773e-07	11.3445	UP
XM_005696574.3	-1.68432	5.88508	-7.68867	2.33449e-09	5.49127e-07	11.2983	DOWN
MSTRG.9577.2	2.68904	0.785636	7.68847	2.336e-09	5.49127e-07	11.2763	UP
XM_005677657.3	-1.93813	5.60512	-7.66906	2.48191e-09	5.78218e-07	11.2445	DOWN
XM_005696862.3	2.92156	2.06865	7.66285	2.53052e-09	5.80636e-07	11.2712	UP
XM_018060260.1	1.59554	3.31042	7.66066	2.5479e-09	5.80636e-07	11.2644	UP
XM_018043446.1	-1.91174	4.90478	-7.65831	2.56667e-09	5.80636e-07	11.2206	DOWN
XM_018044562.1	2.34193	1.70412	7.65524	2.5914e-09	5.80636e-07	11.2536	UP
XM_018041876.1	-1.28543	4.91389	-7.65374	2.60355e-09	5.80636e-07	11.2051	DOWN
XM_018045973.1	1.8294	4.33889	7.64954	2.63791e-09	5.83314e-07	11.2076	UP
XM_018042035.1	-1.03931	5.06855	-7.62211	2.87405e-09	6.2717e-07	11.1029	DOWN
XM_005689891.3	3.27957	1.54386	7.62097	2.88431e-09	6.2717e-07	11.1112	UP
XM_018064172.1	3.93283	1.27315	7.59374	3.14084e-09	6.77306e-07	11.05	UP
XM_005679839.2	4.65165	5.23804	7.58933	3.18445e-09	6.81081e-07	11.022	UP
XM_005686372.3	2.08892	3.61574	7.58048	3.27396e-09	6.93974e-07	11.0237	UP
MSTRG.11599.1	4.995	1.04806	7.57815	3.29793e-09	6.93974e-07	11.0055	UP
MSTRG.3838.1	4.67293	1.65064	7.57281	3.35352e-09	7.00027e-07	10.9889	UP
XM_005676329.3	1.50916	2.01242	7.56595	3.42634e-09	7.09552e-07	10.9897	UP
XM_013972752.2	-1.49419	3.80446	-7.54752	3.63002e-09	7.45812e-07	10.9091	DOWN
XR_001918593.1	3.45559	1.05709	7.53796	3.74036e-09	7.62479e-07	10.8595	UP
MSTRG.293.1	2.9175	1.29424	7.52188	3.93385e-09	7.95706e-07	10.8214	UP
XM_018045792.1	2.32621	2.25527	7.51261	4.0499e-09	8.12878e-07	10.8306	UP
MSTRG.6267.1	3.90952	1.00809	7.50642	4.12932e-09	8.22492e-07	10.7863	UP
MSTRG.4188.35	8.32111	7.99345	7.50237	4.18205e-09	8.26683e-07	10.7427	UP
MSTRG.657.1	2.71788	1.47038	7.49593	4.26751e-09	8.37235e-07	10.7616	UP
XM_018043481.1	-1.74927	4.1274	-7.49277	4.31001e-09	8.39262e-07	10.735	DOWN
MSTRG.6445.1	1.26539	3.64441	7.47726	4.52496e-09	8.74591e-07	10.6838	UP
XM_005675110.3	3.03091	0.93665	7.47373	4.57548e-09	8.77853e-07	10.6629	UP
MSTRG.1703.2	2.28361	1.55219	7.42603	5.31536e-09	1.0096e-06	10.556	UP
XR_001295540.2	3.45386	1.00477	7.42425	5.34507e-09	1.0096e-06	10.5175	UP
XM_005675013.3	1.82261	2.29534	7.42229	5.37824e-09	1.0096e-06	10.5566	UP
XM_005678311.3	1.37788	3.60986	7.41981	5.42023e-09	1.01022e-06	10.5166	UP
XM_018062659.1	0.925536	3.57999	7.40442	5.68922e-09	1.05283e-06	10.4653	NOT
XM_018042471.1	2.87291	0.382925	7.39987	5.77111e-09	1.06046e-06	10.4305	UP
MSTRG.11653.2	4.23944	1.34389	7.39298	5.89766e-09	1.07614e-06	10.4534	UP
XM_013971605.2	5.61894	6.64777	7.38077	6.12864e-09	1.11052e-06	10.3836	UP
XM_018055389.1	-1.29211	9.9649	-7.32121	7.39359e-09	1.33049e-06	10.1365	DOWN
XR_001919380.1	3.98742	1.77384	7.31544	7.52953e-09	1.34567e-06	10.2257	UP
MSTRG.15558.7	3.16911	1.5534	7.3075	7.72036e-09	1.37039e-06	10.1965	UP
XM_005684318.3	1.67835	4.7776	7.29741	7.97004e-09	1.40515e-06	10.1052	UP
XM_018039339.1	4.56911	3.20841	7.29153	8.11921e-09	1.41356e-06	10.1556	UP
XM_005691458.3	1.58074	3.77369	7.2901	8.15597e-09	1.41356e-06	10.1122	UP
XM_018054831.1	3.37483	3.95398	7.28669	8.24427e-09	1.41356e-06	10.1172	UP
NM_001314323.1	3.13468	1.49142	7.28649	8.24945e-09	1.41356e-06	10.127	UP
XM_005681060.3	2.77029	2.00159	7.28499	8.28861e-09	1.41356e-06	10.1335	UP
XM_005675625.3	1.98357	2.6275	7.2821	8.36444e-09	1.41723e-06	10.1297	UP
XM_018038204.1	1.79479	3.72844	7.27253	8.62116e-09	1.44476e-06	10.0671	UP
MSTRG.276.1	3.45014	0.804744	7.27192	8.63766e-09	1.44476e-06	10.0636	UP
XM_013967404.2	4.09094	4.63071	7.26503	8.82761e-09	1.46713e-06	10.0503	UP
XM_018049574.1	3.65017	5.3038	7.26123	8.93422e-09	1.47101e-06	10.0105	UP
XM_005684351.3	-1.65507	1.41288	-7.25832	9.01675e-09	1.47101e-06	10.0305	DOWN
XM_018054619.1	-0.780222	6.98955	-7.2582	9.02013e-09	1.47101e-06	9.9556	NOT
XM_018063561.1	6.91719	3.46438	7.22316	1.00758e-08	1.63228e-06	9.94759	UP
XM_018047988.1	1.09528	4.69484	7.22134	1.01341e-08	1.63228e-06	9.86566	UP
MSTRG.2220.2	1.87607	4.82736	7.21228	1.04284e-08	1.66938e-06	9.84548	UP
XM_018039340.1	5.03047	3.08462	7.20525	1.06629e-08	1.6965e-06	9.89118	UP
XM_005681114.3	4.67823	3.40013	7.19993	1.08436e-08	1.70464e-06	9.87346	UP
XM_005690015.3	3.51248	5.03986	7.1999	1.08447e-08	1.70464e-06	9.82755	UP
XM_018039773.1	2.07464	7.02742	7.18973	1.11992e-08	1.74983e-06	9.74229	UP
MSTRG.10806.1	1.67649	3.33681	7.18153	1.14937e-08	1.78515e-06	9.79541	UP
XM_018058602.1	2.66911	0.363012	7.16907	1.19559e-08	1.84583e-06	9.7415	UP
XM_005690418.3	4.70791	7.74427	7.16722	1.20258e-08	1.84583e-06	9.67313	UP
XM_005691552.3	1.3609	7.08002	7.15517	1.24933e-08	1.90636e-06	9.63341	UP
XM_018050022.1	2.10543	4.50458	7.15067	1.26729e-08	1.91307e-06	9.66029	UP
MSTRG.13941.4	6.49592	3.49381	7.15039	1.26839e-08	1.91307e-06	9.72867	UP
MSTRG.8540.3	3.5678	1.18375	7.14222	1.30163e-08	1.94151e-06	9.69006	UP
XM_005685061.3	1.15348	4.88118	7.14084	1.30736e-08	1.94151e-06	9.61173	UP
XM_005675338.3	1.53574	5.43779	7.1403	1.30957e-08	1.94151e-06	9.60323	UP
XM_018039179.1	0.873603	4.77719	7.13554	1.32948e-08	1.95989e-06	9.59884	NOT
XM_005680677.3	-1.62328	2.53591	-7.12439	1.37725e-08	2.0189e-06	9.64841	DOWN
MSTRG.6814.1	3.07012	2.74179	7.12261	1.38506e-08	2.01901e-06	9.63788	UP
XM_018050190.1	3.3002	0.951844	7.11851	1.40314e-08	2.02451e-06	9.60803	UP
XM_018038230.1	2.513	2.12096	7.11824	1.40435e-08	2.02451e-06	9.63144	UP
MSTRG.9236.2	4.2539	4.89632	7.11245	1.43035e-08	2.05067e-06	9.57032	UP
XM_018053703.1	1.58495	3.80697	7.10636	1.45824e-08	2.07013e-06	9.5502	UP
MSTRG.4188.28	9.15411	4.53964	7.10451	1.46682e-08	2.07013e-06	9.58967	UP
XM_013965100.2	0.995773	4.21733	7.10431	1.46773e-08	2.07013e-06	9.52094	NOT
XM_005698980.3	1.8226	1.53534	7.09061	1.53288e-08	2.1504e-06	9.54481	UP
XM_018058133.1	1.10191	4.75868	7.08647	1.5531e-08	2.16712e-06	9.44271	UP
XM_005686386.3	4.60347	6.45031	7.08079	1.58136e-08	2.18872e-06	9.43799	UP
XM_018061598.1	1.22715	3.13853	7.07999	1.58536e-08	2.18872e-06	9.48411	UP
MSTRG.4029.6	4.0354	1.73498	7.06226	1.67704e-08	2.30311e-06	9.45793	UP
XM_013965507.2	1.42931	5.48685	7.05739	1.70317e-08	2.32674e-06	9.34304	UP
XM_005693727.3	-0.827254	6.09772	-7.04509	1.77098e-08	2.40679e-06	9.29914	NOT
MSTRG.6329.4	2.54893	3.43858	7.03221	1.84486e-08	2.4942e-06	9.32486	UP
XM_018060323.1	-1.34906	4.51154	-7.02603	1.8814e-08	2.53048e-06	9.26659	DOWN
XM_005690878.3	2.94266	1.52106	7.01274	1.96252e-08	2.62605e-06	9.30433	UP
XM_018049224.1	2.03527	3.57071	6.99439	2.08026e-08	2.7694e-06	9.20687	UP
XM_018051283.1	3.6579	1.26457	6.99112	2.102e-08	2.78414e-06	9.23939	UP
XM_005695003.3	2.4797	1.14714	6.98916	2.11514e-08	2.78739e-06	9.22028	UP
XM_018061574.1	-1.11695	3.65569	-6.98483	2.14441e-08	2.81177e-06	9.16849	DOWN
XM_018049537.1	5.94808	2.51929	6.98086	2.17163e-08	2.83322e-06	9.21108	UP
MSTRG.10038.2	3.48121	0.672125	6.97718	2.19721e-08	2.8419e-06	9.18331	UP
MSTRG.16167.3	3.9042	4.58185	6.97677	2.20007e-08	2.8419e-06	9.15512	UP
XM_018049129.1	9.03756	8.16221	6.97125	2.23896e-08	2.8779e-06	9.10288	UP
XM_018054380.1	2.51064	0.785348	6.96777	2.26387e-08	2.88279e-06	9.13413	UP
XR_001296605.2	1.84801	5.20687	6.96764	2.26486e-08	2.88279e-06	9.07231	UP
XM_013962921.2	2.33681	3.82495	6.96506	2.28349e-08	2.89238e-06	9.10765	UP
XM_018047457.1	1.70356	2.41413	6.9613	2.31092e-08	2.91298e-06	9.13984	UP
XM_018052254.1	2.56677	3.01515	6.94919	2.40161e-08	3.01275e-06	9.09463	UP
MSTRG.15896.2	3.58641	1.91815	6.94674	2.42041e-08	3.01537e-06	9.10694	UP
MSTRG.12007.1	1.487	4.3112	6.94591	2.42681e-08	3.01537e-06	9.01993	UP
XM_018041009.1	2.64347	3.30448	6.94337	2.44651e-08	3.02543e-06	9.04846	UP
XM_018053107.1	3.32906	8.86586	6.94049	2.46899e-08	3.03883e-06	8.95212	UP
MSTRG.7148.5	1.98484	1.04938	6.93834	2.48593e-08	3.0415e-06	9.07209	UP
MSTRG.10674.3	4.98995	2.31484	6.93727	2.49446e-08	3.0415e-06	9.0788	UP
XM_018054686.1	1.73531	3.40196	6.93455	2.5161e-08	3.0536e-06	9.02974	UP
XM_005687536.3	-1.57051	2.91225	-6.927	2.57726e-08	3.11335e-06	9.03098	DOWN
XM_018052126.1	3.40171	0.294724	6.92447	2.59805e-08	3.12401e-06	9.02424	UP
XR_001918103.1	2.69808	1.99011	6.92133	2.62413e-08	3.1409e-06	9.02619	UP
XM_005691340.3	1.60244	4.0056	6.91091	2.71267e-08	3.23204e-06	8.93007	UP
XM_018049043.1	1.39095	6.01369	6.90837	2.73463e-08	3.24339e-06	8.87197	UP
XM_018038493.1	4.02996	1.93299	6.89748	2.83112e-08	3.34212e-06	8.95748	UP
XM_018056264.1	1.2161	5.37365	6.89611	2.84348e-08	3.34212e-06	8.83987	UP
XR_001296690.2	3.08389	0.381741	6.88741	2.92329e-08	3.42051e-06	8.90211	UP
XM_005689122.3	3.87944	1.71275	6.88365	2.95854e-08	3.4463e-06	8.91387	UP
XM_018044222.1	-1.30657	4.13426	-6.88111	2.98252e-08	3.4588e-06	8.82912	DOWN
XM_018063942.1	0.990402	4.61557	6.86627	3.12684e-08	3.61012e-06	8.76006	NOT
XM_005680261.3	-1.8839	0.342429	-6.85574	3.2335e-08	3.70715e-06	8.74501	DOWN
XM_018064350.1	1.46986	3.24437	6.85518	3.2393e-08	3.70715e-06	8.79273	UP
XM_018046921.1	-0.791943	3.38982	-6.85238	3.26825e-08	3.72394e-06	8.77048	NOT
XM_018043927.1	1.07643	2.85799	6.8476	3.31845e-08	3.75122e-06	8.77646	UP
MSTRG.16288.1	-2.24937	1.69095	-6.84736	3.32094e-08	3.75122e-06	8.78738	DOWN
XM_018065701.1	-1.52978	3.42561	-6.84391	3.35766e-08	3.77636e-06	8.75172	DOWN
MSTRG.390.2	3.24843	0.821966	6.82441	3.57291e-08	4.0012e-06	8.72445	UP
XM_018053149.1	2.42116	2.19714	6.81929	3.63171e-08	4.04966e-06	8.71481	UP
XM_005696337.2	1.43973	5.86016	6.81678	3.66093e-08	4.06488e-06	8.58259	UP
MSTRG.1252.1	2.4219	3.76371	6.8131	3.70413e-08	4.09542e-06	8.62697	UP
XM_018040035.1	1.06188	4.45539	6.8111	3.72782e-08	4.10422e-06	8.59442	UP
XM_018039605.1	-1.20384	3.3068	-6.8097	3.74443e-08	4.10518e-06	8.6442	DOWN
NM_001285587.1	7.80375	14.8665	6.80615	3.78707e-08	4.13457e-06	8.51023	UP
XM_018049133.1	8.88254	9.22158	6.80464	3.80536e-08	4.13722e-06	8.53884	UP
XM_005684138.3	1.58118	4.30594	6.7932	3.9467e-08	4.27308e-06	8.54942	UP
XM_013966147.2	2.24738	2.99471	6.7914	3.9695e-08	4.28001e-06	8.60818	UP
MSTRG.13941.6	5.38962	3.63516	6.77777	4.14586e-08	4.45176e-06	8.59118	UP
XM_005697656.3	1.50749	7.58702	6.77484	4.18474e-08	4.4751e-06	8.43562	UP
MSTRG.14721.17	3.93192	0.350912	6.76922	4.26044e-08	4.53745e-06	8.56191	UP
XM_005686014.3	1.47035	1.98125	6.76266	4.35051e-08	4.61145e-06	8.54047	UP
MSTRG.1562.2	2.47776	1.85759	6.7616	4.36526e-08	4.61145e-06	8.54011	UP
XM_018040723.1	3.02262	4.92972	6.73839	4.70095e-08	4.9373e-06	8.37251	UP
XM_018067128.1	2.41334	3.63947	6.73768	4.71157e-08	4.9373e-06	8.4122	UP
MSTRG.11868.1	1.97064	1.94379	6.72816	4.85693e-08	5.06928e-06	8.43797	UP
XM_005677920.3	-1.67301	4.34588	-6.72292	4.93885e-08	5.13424e-06	8.33013	DOWN
XM_018051888.1	-1.45862	3.42961	-6.71696	5.03369e-08	5.21207e-06	8.35578	DOWN
XR_001918247.1	3.56614	1.04939	6.71259	5.10454e-08	5.26454e-06	8.3827	UP
XM_005686935.3	-1.17432	4.93294	-6.70803	5.17926e-08	5.30901e-06	8.26367	DOWN
XM_018038391.1	1.37542	3.68318	6.70749	5.18836e-08	5.30901e-06	8.31688	UP
XM_018067049.1	1.83873	8.02554	6.69944	5.32334e-08	5.42586e-06	8.19778	UP
XM_018040564.1	1.83058	4.24339	6.67758	5.70831e-08	5.77006e-06	8.18617	UP
XM_018039760.1	1.89528	3.57025	6.67656	5.72696e-08	5.77006e-06	8.21573	UP
XM_005682285.3	-1.89398	4.88781	-6.67654	5.72738e-08	5.77006e-06	8.16838	DOWN
XM_018049266.1	3.00025	4.392	6.66513	5.94006e-08	5.96131e-06	8.18515	UP
XM_005677238.3	-1.54557	6.89431	-6.6513	6.20845e-08	6.18784e-06	8.05524	DOWN
MSTRG.9214.1	3.59049	0.782136	6.65106	6.21321e-08	6.18784e-06	8.20036	UP
XM_018038431.1	2.60886	1.19359	6.64856	6.26313e-08	6.21383e-06	8.19406	UP
MSTRG.11295.8	3.12224	1.61168	6.64605	6.31358e-08	6.23188e-06	8.18764	UP
XM_005700534.3	-1.42798	3.57985	-6.64528	6.32909e-08	6.23188e-06	8.12618	DOWN
MSTRG.16509.2	2.47119	3.2088	6.64092	6.41801e-08	6.29568e-06	8.12548	UP
XM_018053313.1	-1.61027	2.62993	-6.63818	6.47435e-08	6.31368e-06	8.14507	DOWN
XM_018052235.1	1.09158	3.31281	6.63768	6.48475e-08	6.31368e-06	8.09761	UP
MSTRG.5738.3	3.8876	3.96725	6.62898	6.66754e-08	6.46751e-06	8.0871	UP
MSTRG.2308.6	-1.90337	3.87141	-6.62369	6.78146e-08	6.55101e-06	8.04894	DOWN
XM_005686652.3	2.78224	4.68852	6.62266	6.80384e-08	6.55101e-06	7.99482	UP
MSTRG.768.1	1.43556	3.41194	6.61231	7.03276e-08	6.74654e-06	8.0155	UP
XM_018046847.1	-3.75932	2.36514	-6.59777	7.36749e-08	7.04176e-06	8.03616	DOWN
XM_005689513.3	0.828571	4.1467	6.59655	7.39622e-08	7.04342e-06	7.92638	NOT
XM_018059058.1	-1.25882	4.54286	-6.59043	7.54242e-08	7.15652e-06	7.90275	DOWN
MSTRG.5524.1	1.15083	3.5652	6.58703	7.62483e-08	7.20851e-06	7.91735	UP
MSTRG.899.1	2.61549	0.543953	6.57764	7.85752e-08	7.40167e-06	7.96204	UP
XM_018052377.1	1.54727	1.50159	6.57353	7.96141e-08	7.46333e-06	7.96624	UP
XM_005676252.3	1.73577	6.70201	6.5728	7.98018e-08	7.46333e-06	7.81176	UP
XM_005683864.3	-1.36609	3.53027	-6.56831	8.09561e-08	7.54425e-06	7.89504	DOWN
XM_018060735.1	1.72495	2.31429	6.55889	8.34339e-08	7.73699e-06	7.89987	UP
XM_018038430.1	2.71998	2.80179	6.5582	8.36175e-08	7.73699e-06	7.89001	UP
XM_005679432.3	1.16655	6.28894	6.55436	8.4652e-08	7.80504e-06	7.75521	UP
XM_018047543.1	2.62874	0.173636	6.54072	8.84305e-08	8.11853e-06	7.85375	UP
XM_018064167.1	-0.939249	2.91384	-6.53986	8.86744e-08	8.11853e-06	7.82805	NOT
XM_005679076.3	2.99029	1.31902	6.53778	8.92649e-08	8.14401e-06	7.8555	UP
MSTRG.7853.1	2.52842	2.66558	6.53456	9.01898e-08	8.19973e-06	7.79524	UP
XM_005675240.3	2.71885	2.08884	6.52873	9.18886e-08	8.31664e-06	7.82142	UP
XM_005688851.3	1.5628	4.92483	6.52797	9.21132e-08	8.31664e-06	7.70271	UP
XM_013963495.2	2.78569	1.72121	6.51675	9.54833e-08	8.59119e-06	7.79056	UP
MSTRG.7408.3	1.361	4.65288	6.5135	9.64806e-08	8.6511e-06	7.65684	UP
XM_018059588.1	2.6321	1.27173	6.49765	1.01505e-07	9.07046e-06	7.73104	UP
MSTRG.10008.4	1.99285	1.29147	6.48305	1.06363e-07	9.47214e-06	7.68805	UP
XM_018053898.1	2.6206	3.41708	6.47969	1.07515e-07	9.54211e-06	7.62321	UP
XM_005678198.3	2.39045	1.59478	6.47478	1.0922e-07	9.63443e-06	7.66416	UP
XM_018047837.1	1.03879	3.63643	6.47457	1.09293e-07	9.63443e-06	7.58396	UP
MSTRG.10016.7	2.97878	0.305782	6.46358	1.13209e-07	9.94365e-06	7.62063	UP
MSTRG.736.1	4.56858	2.92535	6.46261	1.13563e-07	9.94365e-06	7.61805	UP
XM_018057384.1	4.58472	2.19047	6.45637	1.15854e-07	1.01103e-05	7.60506	UP
XM_018065344.1	0.931911	5.3966	6.44292	1.20958e-07	1.05077e-05	7.41426	NOT
XM_005676043.3	-1.70162	3.57388	-6.44191	1.21349e-07	1.05077e-05	7.4908	DOWN
XM_005678519.3	2.70143	5.99598	6.44123	1.21616e-07	1.05077e-05	7.40935	UP
XM_018046613.1	5.70439	4.66393	6.43392	1.24495e-07	1.0721e-05	7.50136	UP
XM_018044949.1	1.49214	3.03234	6.4269	1.2733e-07	1.0929e-05	7.4655	UP
XM_005688637.3	0.951793	3.14529	6.42113	1.29707e-07	1.10965e-05	7.43004	NOT
XM_018064094.1	-1.55608	4.7161	-6.41824	1.30915e-07	1.11633e-05	7.35532	DOWN
XM_018039131.1	2.62924	0.590558	6.41721	1.31348e-07	1.11637e-05	7.48675	UP
XM_013976196.2	1.43599	3.60089	6.41553	1.32055e-07	1.11873e-05	7.40078	UP
XM_018038286.1	1.34453	6.44483	6.41399	1.32709e-07	1.12064e-05	7.31179	UP
XM_005683188.3	-1.29229	5.14075	-6.41135	1.33835e-07	1.1265e-05	7.32249	DOWN
XM_013962542.2	-1.23491	1.72007	-6.41007	1.34389e-07	1.12753e-05	7.46456	DOWN
XM_018055440.1	-1.34766	2.78542	-6.40462	1.36757e-07	1.14372e-05	7.40502	DOWN
XM_018054832.1	2.91005	3.99031	6.39845	1.39488e-07	1.16277e-05	7.34464	UP
XM_018044870.1	-1.32922	4.37457	-6.39747	1.39926e-07	1.16277e-05	7.30518	DOWN
MSTRG.10563.5	5.26153	1.33622	6.39485	1.41105e-07	1.16291e-05	7.4185	UP
XM_005690948.3	-1.81667	1.65874	-6.39485	1.41108e-07	1.16291e-05	7.41913	DOWN
XR_310209.3	2.69254	3.10295	6.39447	1.41281e-07	1.16291e-05	7.36153	UP
XM_018065819.1	8.47459	4.61144	6.3743	1.5072e-07	1.23671e-05	7.34912	UP
XM_018049538.1	5.31088	1.77361	6.35867	1.58463e-07	1.29617e-05	7.30583	UP
XM_018043311.1	-1.95038	2.96956	-6.3569	1.59368e-07	1.2995e-05	7.25858	DOWN
XM_005689517.3	3.08704	0.394307	6.3252	1.76428e-07	1.43e-05	7.20531	UP
XM_018047943.1	2.20953	1.19695	6.32512	1.76469e-07	1.43e-05	7.20624	UP
XM_018059626.1	1.49563	1.40396	6.32413	1.77032e-07	1.43012e-05	7.19968	UP
MSTRG.13415.5	3.1778	0.934578	6.30842	1.86183e-07	1.49941e-05	7.15493	UP
XM_018064531.1	-1.0412	4.66031	-6.30317	1.89345e-07	1.52018e-05	6.99069	DOWN
XM_005693420.3	1.15955	3.15766	6.30057	1.90929e-07	1.5282e-05	7.05617	UP
XM_018054342.1	-1.1621	2.82718	-6.29389	1.95067e-07	1.55654e-05	7.06218	DOWN
XR_001295704.2	1.16527	3.16256	6.29056	1.97164e-07	1.56847e-05	7.02906	UP
XM_005687459.3	2.8454	1.06141	6.28502	2.00702e-07	1.58434e-05	7.08366	UP
XM_005680938.2	2.38838	2.11131	6.28453	2.01018e-07	1.58434e-05	7.07306	UP
XM_005695783.2	1.15734	4.82043	6.28451	2.01033e-07	1.58434e-05	6.92902	UP
XM_018044863.1	1.45959	5.76928	6.28331	2.01804e-07	1.58434e-05	6.90511	UP
XM_018058864.1	1.89256	3.35805	6.28271	2.02194e-07	1.58434e-05	6.98034	UP
MSTRG.3012.1	3.03141	0.194624	6.27869	2.04821e-07	1.60012e-05	7.06043	UP
XM_013964082.2	4.45826	2.53153	6.26957	2.10907e-07	1.64274e-05	7.03121	UP
MSTRG.261.1	3.00471	-0.00962407	6.26691	2.12709e-07	1.65185e-05	7.02499	UP
MSTRG.16973.3	1.31728	1.6643	6.26361	2.14976e-07	1.6645e-05	7.01446	UP
XM_018058423.1	-1.34638	1.92442	-6.26149	2.16448e-07	1.67094e-05	6.9995	DOWN
XM_005683223.3	-1.02966	0.819996	-6.25759	2.19173e-07	1.68698e-05	6.99519	DOWN
XM_018044048.1	1.23414	2.61739	6.25303	2.22405e-07	1.70683e-05	6.92943	UP
MSTRG.12012.5	2.64205	0.960469	6.24885	2.25403e-07	1.72476e-05	6.96932	UP
XM_018049131.1	7.99568	4.1567	6.2477	2.26239e-07	1.7261e-05	6.91408	UP
XM_018043946.1	3.07197	0.29523	6.24563	2.27747e-07	1.73253e-05	6.96194	UP
XM_018056567.1	-1.17461	1.58336	-6.24409	2.28879e-07	1.73609e-05	6.95311	DOWN
MSTRG.16168.3	6.26634	1.90229	6.24033	2.31656e-07	1.75206e-05	6.94173	UP
XM_013972780.2	1.78702	3.0471	6.23773	2.33598e-07	1.76164e-05	6.88261	UP
MSTRG.12811.1	1.99344	2.97899	6.23553	2.35254e-07	1.76902e-05	6.87392	UP
MSTRG.15577.1	2.80738	1.08615	6.23293	2.37226e-07	1.77872e-05	6.92397	UP
XM_018051405.1	2.33538	1.35363	6.23068	2.38947e-07	1.78649e-05	6.91762	UP
XR_001296366.2	3.26755	1.20595	6.22722	2.41614e-07	1.80127e-05	6.90676	UP
XM_018044202.1	-1.2711	1.84418	-6.22409	2.44054e-07	1.81427e-05	6.8916	DOWN
XM_013972351.2	2.45044	0.412944	6.22017	2.47148e-07	1.82905e-05	6.87927	UP
XM_018051333.1	1.73115	5.3999	6.21905	2.48033e-07	1.82905e-05	6.70717	UP
XM_005685235.3	1.18256	5.6136	6.21891	2.48145e-07	1.82905e-05	6.70811	UP
XM_018038896.1	2.37783	3.67072	6.21373	2.5231e-07	1.85451e-05	6.76877	UP
XM_018060531.1	-1.58209	4.30632	-6.20499	2.59489e-07	1.90192e-05	6.69537	DOWN
XM_018063683.1	-2.85118	2.55448	-6.19976	2.63885e-07	1.92677e-05	6.80299	DOWN
XM_005688679.3	1.50644	5.79129	6.19891	2.64601e-07	1.92677e-05	6.6418	UP
XM_018066127.1	3.49252	3.15554	6.19833	2.65095e-07	1.92677e-05	6.76567	UP
XM_018065541.1	-1.3802	4.66219	-6.19531	2.67678e-07	1.94014e-05	6.6559	DOWN
XM_018038231.1	2.11423	1.26912	6.19286	2.69796e-07	1.94673e-05	6.79933	UP
XM_018056780.1	-1.72171	0.456061	-6.19253	2.70079e-07	1.94673e-05	6.77811	DOWN
XR_001918819.1	-1.41024	0.950755	-6.19109	2.71335e-07	1.9504e-05	6.79081	DOWN
XM_005677498.3	-1.39006	4.7789	-6.19019	2.72119e-07	1.95066e-05	6.63768	DOWN
XM_005691414.3	1.67119	4.69972	6.18272	2.78723e-07	1.98981e-05	6.61939	UP
XM_018061182.1	3.69186	1.33357	6.18209	2.79283e-07	1.98981e-05	6.76425	UP
XM_005692038.3	-0.80391	3.77643	-6.18144	2.79869e-07	1.98981e-05	6.65131	NOT
MSTRG.2405.3	4.15918	2.74905	6.17184	2.88629e-07	2.04652e-05	6.72231	UP
XM_018060053.1	2.14386	3.46982	6.17008	2.90268e-07	2.05256e-05	6.63735	UP
XM_018053327.1	-1.1118	1.86846	-6.16856	2.91684e-07	2.05701e-05	6.71343	DOWN
XM_018057866.1	-1.57965	3.87275	-6.1618	2.98085e-07	2.09562e-05	6.58084	DOWN
XM_013963731.2	-1.43886	2.97966	-6.16109	2.98767e-07	2.09562e-05	6.64602	DOWN
XM_018060316.1	0.891217	5.09248	6.15883	3.0095e-07	2.10528e-05	6.52466	NOT
MSTRG.14857.1	3.34464	0.691746	6.15399	3.05659e-07	2.13129e-05	6.68249	UP
MSTRG.7766.7	6.73447	7.48618	6.15334	3.06302e-07	2.13129e-05	6.47944	UP
XM_013974709.2	3.44611	0.819379	6.1514	3.08218e-07	2.13891e-05	6.67541	UP
XM_005684367.3	1.32328	6.36153	6.14685	3.12747e-07	2.16459e-05	6.46792	UP
XM_018047439.1	1.66978	4.61343	6.14407	3.15559e-07	2.17827e-05	6.50908	UP
XM_005685043.3	2.24325	7.43606	6.1362	3.23634e-07	2.21991e-05	6.42536	UP
MSTRG.25.1	1.12947	6.36409	6.13611	3.23723e-07	2.21991e-05	6.43513	UP
MSTRG.5491.1	2.43858	0.501986	6.13571	3.24143e-07	2.21991e-05	6.62659	UP
XM_018039475.1	-1.43164	2.47773	-6.13348	3.26471e-07	2.23e-05	6.5865	DOWN
XM_005678650.3	2.47066	0.594975	6.13088	3.29214e-07	2.24287e-05	6.6097	UP
XM_018066289.1	3.01675	0.848796	6.12791	3.32362e-07	2.25842e-05	6.60199	UP
XM_018046615.1	2.6167	5.65895	6.11701	3.44205e-07	2.33282e-05	6.39123	UP
XM_018060182.1	1.56313	1.44382	6.11268	3.49028e-07	2.35938e-05	6.54005	UP
NM_001285539.1	4.8685	8.27603	6.10254	3.60583e-07	2.43119e-05	6.30682	UP
XM_018050116.1	1.27479	5.34241	6.08819	3.77594e-07	2.53932e-05	6.29707	UP
XM_013967646.2	1.00657	5.1088	6.08736	3.786e-07	2.53954e-05	6.29952	UP
MSTRG.3331.1	0.733375	3.1417	6.08636	3.79817e-07	2.54117e-05	6.37617	NOT
MSTRG.7880.1	1.80287	2.5991	6.07293	3.96559e-07	2.64639e-05	6.37257	UP
MSTRG.7222.4	2.36793	1.55988	6.06909	4.01486e-07	2.67244e-05	6.41813	UP
MSTRG.10038.1	2.14732	1.60992	6.06395	4.08173e-07	2.71004e-05	6.40065	UP
MSTRG.14163.1	-1.57702	2.28181	-6.06077	4.12355e-07	2.73086e-05	6.37142	DOWN
XM_005699871.3	-0.921954	3.58143	-6.05995	4.13448e-07	2.73116e-05	6.28576	NOT
XM_018046616.1	2.35473	2.97769	6.05173	4.24517e-07	2.7972e-05	6.30796	UP
XM_018065635.1	-1.7848	3.75701	-6.0465	4.31699e-07	2.83736e-05	6.2351	DOWN
XM_013966480.2	1.28745	2.45444	6.04453	4.34451e-07	2.84827e-05	6.2986	UP
XM_018041119.1	2.21517	6.93043	6.04066	4.3988e-07	2.87664e-05	6.12943	UP
NM_001314221.1	4.83453	3.93495	6.03551	4.47214e-07	2.91397e-05	6.3056	UP
XM_005689136.3	0.916087	4.901	6.03509	4.47823e-07	2.91397e-05	6.13979	NOT
MSTRG.8297.3	3.24476	0.447604	6.031	4.53747e-07	2.93722e-05	6.30816	UP
XM_005679983.3	1.01871	7.88948	6.03023	4.54871e-07	2.93722e-05	6.08617	UP
XM_018038214.1	1.2748	7.07754	6.02998	4.55236e-07	2.93722e-05	6.09206	UP
XM_018051859.1	2.48972	2.93785	6.02953	4.55898e-07	2.93722e-05	6.23126	UP
MSTRG.7412.1	1.30092	4.03503	6.02831	4.57689e-07	2.9415e-05	6.14452	UP
XM_005686928.3	-1.00424	2.05747	-6.02591	4.61222e-07	2.9536e-05	6.26722	DOWN
XM_018049539.1	5.42542	2.18346	6.0255	4.61836e-07	2.9536e-05	6.27951	UP
XM_005696028.3	-1.66657	0.538661	-6.02316	4.65327e-07	2.96865e-05	6.27748	DOWN
XM_005682690.3	-1.26659	2.23255	-6.02198	4.67087e-07	2.97261e-05	6.25388	DOWN
MSTRG.17923.1	1.70156	2.64808	6.01163	4.8288e-07	3.06564e-05	6.18436	UP
XM_018057588.1	0.593074	4.95782	6.00606	4.91592e-07	3.11327e-05	6.04286	NOT
XM_018046028.1	-0.967249	4.14089	-6.00532	4.92768e-07	3.11327e-05	6.07097	NOT
XM_005683109.3	2.91331	1.81851	6.00234	4.97507e-07	3.13562e-05	6.21385	UP
XM_005698536.3	-1.98399	2.21399	-5.99611	5.07562e-07	3.19128e-05	6.15865	DOWN
XM_018060484.1	0.825294	5.60011	5.9939	5.11188e-07	3.20635e-05	5.99648	NOT
XM_018048314.1	1.6263	2.64656	5.99066	5.16536e-07	3.23213e-05	6.11609	UP
MSTRG.10563.2	3.77136	1.1853	5.98706	5.22532e-07	3.26183e-05	6.17303	UP
XM_005685797.3	-2.04845	2.25729	-5.98584	5.24598e-07	3.26691e-05	6.14312	DOWN
MSTRG.15759.1	2.27021	0.700471	5.98184	5.31373e-07	3.28805e-05	6.15828	UP
XM_005678997.3	3.32713	3.01505	5.98125	5.32387e-07	3.28805e-05	6.09433	UP
XM_018064673.1	2.39626	2.85823	5.98123	5.32411e-07	3.28805e-05	6.08283	UP
XM_018042327.1	1.29613	5.6136	5.98087	5.33034e-07	3.28805e-05	5.94953	UP
XM_018048216.1	0.848008	3.66389	5.97512	5.42978e-07	3.34146e-05	6.00308	NOT
MSTRG.10450.1	0.779724	3.18203	5.97371	5.45436e-07	3.34146e-05	6.01666	NOT
MSTRG.10016.2	2.43854	0.351652	5.97366	5.45534e-07	3.34146e-05	6.13174	UP
MSTRG.9008.5	-1.94066	0.141483	-5.97122	5.4982e-07	3.35982e-05	6.10841	DOWN
XM_018045076.1	1.51603	3.56935	5.96624	5.58691e-07	3.40598e-05	6.00527	UP
XM_018053892.1	2.69132	0.976328	5.96526	5.60444e-07	3.40598e-05	6.10513	UP
MSTRG.2305.3	-2.07723	0.00139515	-5.96479	5.61289e-07	3.40598e-05	6.09409	DOWN
MSTRG.3383.1	2.62737	1.40902	5.9611	5.67989e-07	3.43864e-05	6.09413	UP
XM_018060746.1	-1.36091	2.78436	-5.9543	5.80526e-07	3.5064e-05	6.01607	DOWN
MSTRG.6702.17	2.91197	0.467795	5.94976	5.8906e-07	3.54974e-05	6.05985	UP
XM_018047541.1	2.71162	0.113237	5.94194	6.04046e-07	3.63165e-05	6.03658	UP
XM_018049755.1	-1.28931	4.01591	-5.93946	6.08891e-07	3.64808e-05	5.88718	DOWN
XM_018046019.1	-1.01921	2.97837	-5.93911	6.09574e-07	3.64808e-05	5.94698	DOWN
XM_005700907.3	-2.0712	0.325163	-5.93798	6.11782e-07	3.65291e-05	6.01346	DOWN
XM_005691329.3	1.35971	1.35289	5.93169	6.24265e-07	3.71128e-05	5.989	UP
XM_005682371.3	1.1791	4.28399	5.93162	6.24402e-07	3.71128e-05	5.83477	UP
MSTRG.10891.1	1.50473	3.81404	5.93075	6.26159e-07	3.71326e-05	5.86027	UP
XM_005694773.3	4.97002	3.48491	5.92774	6.32235e-07	3.74011e-05	5.93912	UP
XM_018052364.1	1.70697	2.94373	5.9271	6.33553e-07	3.74011e-05	5.90888	UP
XM_018054633.1	1.44285	2.93534	5.91522	6.58194e-07	3.87681e-05	5.87035	UP
XM_018067224.1	0.804386	7.60415	5.90794	6.73763e-07	3.95957e-05	5.70244	NOT
XM_018059055.1	-1.40417	1.30209	-5.90646	6.76969e-07	3.96947e-05	5.92198	DOWN
XM_013976677.2	-1.89436	-0.0378685	-5.90309	6.84335e-07	4.00367e-05	5.90704	DOWN
XM_005700378.2	0.922029	4.41163	5.90027	6.90566e-07	4.03108e-05	5.72479	NOT
XM_018049234.1	0.863097	5.52411	5.8968	6.98321e-07	4.06003e-05	5.69107	NOT
XM_005696446.3	-1.51444	5.05099	-5.89632	6.99389e-07	4.06003e-05	5.70947	DOWN
XM_018044781.1	2.00046	4.91901	5.89596	7.00192e-07	4.06003e-05	5.7081	UP
XM_018049202.1	2.31283	0.80063	5.89045	7.12698e-07	4.12338e-05	5.879	UP
MSTRG.12902.1	5.68033	3.04216	5.88784	7.18711e-07	4.14896e-05	5.84086	UP
XM_018039556.1	-1.54804	4.46585	-5.88705	7.20526e-07	4.15026e-05	5.70623	DOWN
XM_018048455.1	-1.57671	3.62937	-5.87938	7.3851e-07	4.24448e-05	5.71741	DOWN
XM_018053034.1	-1.55615	1.62688	-5.8776	7.4274e-07	4.25941e-05	5.82407	DOWN
XM_018061625.1	2.39129	1.46697	5.87578	7.47096e-07	4.27499e-05	5.82549	UP
XM_005680370.3	0.939917	5.41394	5.87438	7.50472e-07	4.28491e-05	5.61904	NOT
XM_005679774.3	1.45061	0.920564	5.87344	7.52728e-07	4.28512e-05	5.81839	UP
MSTRG.10074.1	1.15051	2.81566	5.873	7.53792e-07	4.28512e-05	5.73912	UP
XR_001919429.1	3.47711	3.29569	5.8716	7.57187e-07	4.29506e-05	5.73967	UP
XM_018060391.1	-2.20889	0.494269	-5.86997	7.61159e-07	4.29908e-05	5.81398	DOWN
XR_311008.3	-1.38692	2.38627	-5.86964	7.6197e-07	4.29908e-05	5.7761	DOWN
XM_018057577.1	-0.828214	3.22141	-5.86929	7.62839e-07	4.29908e-05	5.71004	NOT
XM_018066470.1	2.76937	2.22955	5.86701	7.68443e-07	4.32133e-05	5.75666	UP
XM_018052367.1	3.21604	4.84694	5.86552	7.72132e-07	4.33274e-05	5.62858	UP
XM_018059388.1	1.46888	3.64326	5.86334	7.77559e-07	4.35383e-05	5.66627	UP
XM_018057222.1	2.69837	0.318479	5.86202	7.80853e-07	4.36291e-05	5.79368	UP
XM_018065547.1	1.36491	6.17447	5.85861	7.89443e-07	4.40148e-05	5.559	UP
XM_018061831.1	-2.25551	0.112786	-5.85688	7.93844e-07	4.41658e-05	5.77097	DOWN
MSTRG.7711.2	1.27647	3.33748	5.85482	7.99134e-07	4.43656e-05	5.6437	UP
XM_018060177.1	1.23729	4.57136	5.8541	8.00973e-07	4.43732e-05	5.58561	UP
XM_005675626.3	1.92819	0.725858	5.84617	8.21634e-07	4.54214e-05	5.74573	UP
XM_018051830.1	1.51286	3.48345	5.84379	8.27936e-07	4.5673e-05	5.61691	UP
XM_018062451.1	-0.955379	3.8552	-5.84162	8.33747e-07	4.58965e-05	5.57631	NOT
XM_018055684.1	2.05697	2.71089	5.83924	8.40133e-07	4.61507e-05	5.66327	UP
XM_005685152.3	-0.643744	5.23376	-5.83584	8.49345e-07	4.65587e-05	5.50289	NOT
XM_018051463.1	-1.63259	2.47619	-5.82925	8.67524e-07	4.74555e-05	5.64308	DOWN
XM_013974034.2	3.68836	1.78915	5.82214	8.87569e-07	4.84505e-05	5.65736	UP
XM_005699918.3	0.929201	5.00991	5.81692	9.02563e-07	4.91661e-05	5.44935	NOT
XM_018057691.1	1.39476	3.81913	5.81178	9.1759e-07	4.98282e-05	5.47297	UP
XM_005678555.3	1.66924	2.75017	5.81146	9.18535e-07	4.98282e-05	5.56028	UP
MSTRG.7327.5	2.9186	0.593691	5.80958	9.2411e-07	4.9972e-05	5.62732	UP
XM_018043214.1	0.950129	4.8518	5.80927	9.25018e-07	4.9972e-05	5.42859	NOT
XM_005676747.3	-1.39976	6.37763	-5.80585	9.35217e-07	5.04186e-05	5.39206	DOWN
XM_018045131.1	1.61813	3.42011	5.80295	9.43996e-07	5.07568e-05	5.45606	UP
XM_005681043.3	-1.24142	2.29819	-5.80249	9.45379e-07	5.07568e-05	5.55953	DOWN
XR_001295647.2	-1.04843	3.25419	-5.80138	9.48749e-07	5.08331e-05	5.49813	DOWN
XM_018052911.1	2.3979	3.28612	5.80013	9.52557e-07	5.09325e-05	5.47232	UP
XM_018065503.1	-1.44095	2.66788	-5.7857	9.97737e-07	5.32392e-05	5.49295	DOWN
MSTRG.3588.1	1.21081	2.30101	5.7826	1.00773e-06	5.36627e-05	5.48186	UP
XM_005674768.2	-2.72191	0.473714	-5.78047	1.01465e-06	5.39211e-05	5.54186	DOWN
XM_005683754.3	-1.7594	6.14013	-5.77903	1.01936e-06	5.40612e-05	5.31337	DOWN
XM_018060393.1	-2.13875	0.611978	-5.77757	1.02413e-06	5.4204e-05	5.53665	DOWN
XM_018062174.1	-2.01579	4.89853	-5.77596	1.02944e-06	5.43748e-05	5.33431	DOWN
XM_018051651.1	1.2316	2.09393	5.76879	1.05342e-06	5.55291e-05	5.45397	UP
XM_018042657.1	1.09995	3.50893	5.76789	1.05646e-06	5.55772e-05	5.36395	UP
XM_013967668.2	-1.4615	0.784982	-5.76412	1.06934e-06	5.61416e-05	5.49473	DOWN
XM_018050548.1	1.51534	3.15033	5.7619	1.07698e-06	5.64288e-05	5.37051	UP
XM_018064011.1	2.23237	1.24504	5.76006	1.08337e-06	5.66501e-05	5.47228	UP
MSTRG.11576.1	1.84876	0.578206	5.74763	1.12748e-06	5.88387e-05	5.44473	UP
XM_018052024.1	0.997099	2.65271	5.74004	1.15527e-06	6.01685e-05	5.33509	NOT
XM_005698777.3	-1.97662	1.78171	-5.73675	1.16754e-06	6.06865e-05	5.38529	DOWN
XM_018065750.1	-1.19088	2.97899	-5.73275	1.18262e-06	6.13483e-05	5.29577	DOWN
MSTRG.5687.1	-1.48681	1.55513	-5.73047	1.19131e-06	6.16763e-05	5.37971	DOWN
XM_018061975.1	1.37783	4.08915	5.7298	1.19387e-06	6.16865e-05	5.22578	UP
XM_013974035.2	3.26168	1.17779	5.7254	1.21085e-06	6.24404e-05	5.37485	UP
MSTRG.6196.1	2.33425	3.40117	5.72454	1.21423e-06	6.24911e-05	5.22609	UP
NM_001285737.1	2.67708	5.01274	5.72323	1.21935e-06	6.26308e-05	5.17838	UP
XM_018040984.1	3.4529	2.09903	5.71939	1.23445e-06	6.32818e-05	5.32272	UP
XM_018044261.1	1.51072	0.908681	5.71693	1.24423e-06	6.36581e-05	5.34762	UP
MSTRG.5880.4	1.18405	2.60462	5.71122	1.26726e-06	6.46377e-05	5.24175	UP
XR_001919057.1	2.87116	0.351652	5.71096	1.26833e-06	6.46377e-05	5.33295	UP
XM_005697510.3	2.20762	1.82116	5.70882	1.27705e-06	6.49179e-05	5.29942	UP
NM_001285695.1	10.1213	7.79657	5.70839	1.2788e-06	6.49179e-05	5.18279	UP
XM_018055450.1	-1.39101	5.84111	-5.70734	1.28313e-06	6.50112e-05	5.08905	DOWN
XM_018059195.1	3.79068	3.17739	5.70203	1.30519e-06	6.60006e-05	5.21477	UP
XM_005683194.3	1.5848	6.57097	5.70002	1.31361e-06	6.6298e-05	5.05745	UP
MSTRG.7417.1	0.945215	2.93143	5.69754	1.32412e-06	6.66991e-05	5.18838	NOT
XM_005697542.3	1.21466	2.25443	5.69432	1.33788e-06	6.72628e-05	5.2194	UP
XM_005698197.3	-1.18418	1.7255	-5.69206	1.3476e-06	6.7621e-05	5.25321	DOWN
MSTRG.14212.1	2.18653	2.78524	5.68996	1.35675e-06	6.79497e-05	5.17751	UP
XM_018055555.1	2.28544	1.41325	5.68719	1.36883e-06	6.83529e-05	5.25135	UP
XM_018058728.1	0.986747	3.6731	5.68692	1.37004e-06	6.83529e-05	5.10016	NOT
XM_018059249.1	-1.92432	4.29753	-5.68502	1.37843e-06	6.86398e-05	5.05446	DOWN
XM_018057575.1	-1.68481	0.902771	-5.68323	1.38636e-06	6.89032e-05	5.2512	DOWN
MSTRG.4075.1	3.87432	1.01378	5.68255	1.38937e-06	6.89137e-05	5.24215	UP
XM_018064315.1	-1.46487	3.09025	-5.682	1.39185e-06	6.89137e-05	5.15168	DOWN
XM_005698262.3	-1.88365	0.188555	-5.67936	1.40369e-06	6.93685e-05	5.23325	DOWN
XM_018055082.1	-0.865704	2.67906	-5.67827	1.4086e-06	6.94794e-05	5.16114	NOT
XM_005691203.3	1.26206	2.44367	5.67317	1.43182e-06	7.04703e-05	5.14182	UP
XM_018054295.1	2.19283	1.30215	5.67227	1.43595e-06	7.04703e-05	5.19602	UP
XM_018048863.1	0.964738	5.1078	5.67209	1.43679e-06	7.04703e-05	4.99259	NOT
XM_005684094.3	-2.64126	2.86857	-5.6714	1.44001e-06	7.04956e-05	5.12371	DOWN
XM_005697716.3	-0.968631	1.99597	-5.67018	1.44562e-06	7.05827e-05	5.17414	NOT
XM_018052701.1	-1.46315	1.93203	-5.66984	1.4472e-06	7.05827e-05	5.17587	DOWN
XM_013967229.2	-2.78899	1.82106	-5.66786	1.45645e-06	7.07117e-05	5.1894	DOWN
XM_018044486.1	2.6559	0.333703	5.66782	1.45661e-06	7.07117e-05	5.19659	UP
XM_018053721.1	1.0753	4.61088	5.66726	1.45924e-06	7.07117e-05	4.99147	UP
XM_018043956.1	1.24473	1.78443	5.66695	1.46068e-06	7.07117e-05	5.16125	UP
MSTRG.15175.5	2.48779	0.503243	5.65935	1.49677e-06	7.23243e-05	5.17492	UP
XM_018057076.1	1.92441	1.78891	5.65721	1.50706e-06	7.26872e-05	5.12054	UP
MSTRG.17011.1	1.07731	2.30625	5.65528	1.51642e-06	7.30036e-05	5.0912	UP
MSTRG.9429.1	1.68065	1.91117	5.65369	1.52417e-06	7.32418e-05	5.11014	UP
XM_018061661.1	-1.6196	2.81141	-5.64864	1.54908e-06	7.43015e-05	5.0371	DOWN
XM_018039181.1	0.981929	2.71305	5.64721	1.55618e-06	7.45055e-05	5.04196	NOT
XM_005689889.2	3.21413	4.76595	5.64405	1.57204e-06	7.51269e-05	4.96656	UP
XM_018046459.1	2.67992	0.597682	5.64237	1.58054e-06	7.53951e-05	5.12558	UP
XM_018056459.1	-1.80871	-0.0474845	-5.6339	1.62406e-06	7.72018e-05	5.0965	DOWN
XM_018057861.1	1.96616	1.68896	5.63385	1.62434e-06	7.72018e-05	5.05392	UP
MSTRG.9525.1	5.07543	2.22967	5.6324	1.6319e-06	7.74202e-05	5.06634	UP
XM_018054456.1	-1.168	1.5149	-5.63177	1.63518e-06	7.74351e-05	5.07421	DOWN
XM_018064169.1	2.33156	1.88916	5.61746	1.71201e-06	8.09268e-05	5.00287	UP
XM_013967804.2	-2.11706	-0.33263	-5.61665	1.71644e-06	8.09467e-05	5.04565	DOWN
XM_018047950.1	1.58144	2.85025	5.61625	1.71864e-06	8.09467e-05	4.95482	UP
XM_005699612.3	1.45504	6.48724	5.6137	1.73276e-06	8.14645e-05	4.78396	UP
XM_018059444.1	-2.08158	-0.285184	-5.61175	1.74364e-06	8.18287e-05	5.03217	DOWN
XM_013969760.2	-1.27992	3.5248	-5.61051	1.75057e-06	8.20064e-05	4.88562	DOWN
XM_018061181.1	2.84216	1.22931	5.60464	1.78386e-06	8.34162e-05	5.00017	UP
XM_018039180.1	-1.52399	3.98239	-5.60085	1.80568e-06	8.42855e-05	4.82948	DOWN
XM_005699144.3	2.04257	1.00273	5.59009	1.86902e-06	8.70862e-05	4.95844	UP
XM_018043556.1	2.55617	0.593724	5.58607	1.8933e-06	8.80603e-05	4.95285	UP
XM_013968785.2	-1.28303	2.07207	-5.58219	1.91699e-06	8.90037e-05	4.89638	DOWN
XM_005676404.3	-1.36671	0.745145	-5.57912	1.93593e-06	8.97197e-05	4.93674	DOWN
MSTRG.8321.1	-0.972531	3.28378	-5.57838	1.94052e-06	8.97197e-05	4.7868	NOT
XM_018043720.1	1.62837	3.62966	5.57803	1.94273e-06	8.97197e-05	4.74219	UP
MSTRG.6592.1	4.97431	2.31366	5.57477	1.9631e-06	9.04534e-05	4.87827	UP
XM_018053072.1	3.01878	0.585059	5.57438	1.96555e-06	9.04534e-05	4.91628	UP
MSTRG.15099.1	3.52004	2.22514	5.57285	1.97521e-06	9.0738e-05	4.88399	UP
XM_005680266.3	-0.577621	5.30544	-5.56958	1.99605e-06	9.15343e-05	4.66618	NOT
XM_018045144.1	1.76721	3.61084	5.56513	2.0247e-06	9.2685e-05	4.7215	UP
XM_018050513.1	1.83126	8.04594	5.56102	2.05155e-06	9.37499e-05	4.60383	UP
XM_018046846.1	-2.60407	1.66797	-5.55966	2.06056e-06	9.39967e-05	4.8416	DOWN
XM_018062018.1	-0.935186	3.15913	-5.54672	2.14775e-06	9.78032e-05	4.71921	NOT
MSTRG.3214.1	1.97079	1.31171	5.54474	2.16147e-06	9.82564e-05	4.80841	UP
MSTRG.13642.1	1.6517	1.79394	5.54281	2.17485e-06	9.8693e-05	4.78071	UP
XM_018057336.1	-1.56677	3.36411	-5.54184	2.18164e-06	9.88293e-05	4.69657	DOWN
XM_013973615.2	1.18168	3.69276	5.53663	2.21834e-06	0.000100135	4.62355	UP
XM_018042929.1	2.1628	2.04572	5.53644	2.21972e-06	0.000100135	4.73047	UP
XM_018043002.1	5.13607	6.2601	5.53612	2.22197e-06	0.000100135	4.57753	UP
XM_018047602.1	2.85995	1.14117	5.53017	2.26476e-06	0.000101887	4.78267	UP
XM_005675551.3	-2.27303	2.52168	-5.52907	2.27271e-06	0.000101931	4.70464	DOWN
MSTRG.15690.1	-1.53481	2.47087	-5.52896	2.27355e-06	0.000101931	4.6986	DOWN
MSTRG.5420.1	2.29779	1.19407	5.52812	2.2797e-06	0.000102031	4.76207	UP
XM_018055194.1	-1.1259	2.38117	-5.52511	2.30175e-06	0.000102842	4.69943	DOWN
MSTRG.2621.1	0.947998	2.29343	5.52203	2.3246e-06	0.000103685	4.6894	NOT
XM_018065140.1	2.6616	2.57414	5.52023	2.33799e-06	0.000104105	4.66134	UP
XM_005694594.3	-1.49773	1.2557	-5.51322	2.39111e-06	0.000106288	4.72606	DOWN
XM_005696206.3	-1.61573	1.65595	-5.51216	2.39922e-06	0.000106467	4.71055	DOWN
XM_018057920.1	-1.42669	5.5402	-5.50997	2.4161e-06	0.000107034	4.4727	DOWN
XM_018057719.1	4.48668	1.94897	5.50909	2.42291e-06	0.000107137	4.70401	UP
XR_001917066.1	2.60246	1.83437	5.50862	2.42662e-06	0.000107137	4.69428	UP
MSTRG.15840.6	-1.81666	0.0524297	-5.50767	2.43401e-06	0.000107282	4.71752	DOWN
XM_018053041.1	0.78763	4.60524	5.50679	2.44086e-06	0.000107402	4.48236	NOT
XM_018049227.1	-1.75769	1.45838	-5.50548	2.45112e-06	0.000107671	4.69481	DOWN
MSTRG.3855.1	1.74362	1.68182	5.50496	2.45523e-06	0.000107671	4.65396	UP
XM_018062040.1	0.561734	3.97346	5.49991	2.4952e-06	0.000109071	4.49456	NOT
XM_018065321.1	-2.24688	1.41118	-5.49988	2.49551e-06	0.000109071	4.68348	DOWN
XM_005696377.3	3.17612	0.287552	5.4973	2.51616e-06	0.00010979	4.68198	UP
XM_013970187.2	-1.33674	1.77259	-5.49487	2.53583e-06	0.000110463	4.62634	DOWN
XM_018047442.1	-1.82335	3.44469	-5.49386	2.54408e-06	0.000110638	4.53114	DOWN
XM_018039654.1	0.675915	2.99357	5.48977	2.5776e-06	0.000111909	4.52357	NOT
XM_018060238.1	1.34145	4.38062	5.48463	2.62036e-06	0.000113577	4.42442	UP
XM_005698442.3	-0.69373	4.11291	-5.48131	2.64832e-06	0.000114598	4.43185	NOT
MSTRG.13178.1	0.972196	2.60233	5.47945	2.66416e-06	0.000115093	4.52716	NOT
XM_018062083.1	-2.12134	0.281864	-5.47794	2.67712e-06	0.00011535	4.6328	DOWN
MSTRG.7590.1	2.99595	1.84784	5.47772	2.67896e-06	0.00011535	4.59929	UP
XM_018055923.1	2.59585	0.220977	5.47483	2.70389e-06	0.000116231	4.61342	UP
XM_013964569.2	4.67569	1.29184	5.46337	2.80487e-06	0.000120374	4.55429	UP
XM_013964211.2	-1.9341	0.5897	-5.46257	2.81213e-06	0.000120488	4.58671	DOWN
XM_018059575.1	1.76975	0.411212	5.45928	2.8419e-06	0.000121564	4.57359	UP
XM_005700491.3	-0.753717	4.10931	-5.45612	2.87078e-06	0.000122598	4.35166	NOT
XM_018041222.1	2.36885	0.431946	5.45362	2.8938e-06	0.000123379	4.54363	UP
XM_018050159.1	-1.46731	9.47875	-5.45271	2.90223e-06	0.000123536	4.25493	DOWN
XM_005692354.3	-2.0485	0.424545	-5.45101	2.91807e-06	0.000124009	4.55164	DOWN
XM_005686065.3	1.15624	1.62699	5.44638	2.96163e-06	0.000125521	4.49172	UP
XR_001917373.1	-1.39891	2.33276	-5.44621	2.96327e-06	0.000125521	4.45578	DOWN
XM_018048441.1	-2.07426	8.10687	-5.44568	2.96833e-06	0.000125531	4.24426	DOWN
XM_018051903.1	-1.4965	2.08606	-5.44442	2.98024e-06	0.000125831	4.48526	DOWN
MSTRG.1800.1	1.88197	1.37624	5.43517	3.0698e-06	0.000129403	4.49423	UP
MSTRG.1363.2	1.08343	4.0324	5.4322	3.09907e-06	0.000130426	4.26934	UP
XM_005675211.3	-1.36835	1.52625	-5.43068	3.11421e-06	0.000130852	4.46572	DOWN
XM_018043557.1	2.82124	0.641346	5.42433	3.17811e-06	0.000133322	4.46031	UP
XM_018054897.1	0.961343	3.1646	5.4221	3.20085e-06	0.000133855	4.30066	NOT
MSTRG.17929.1	1.41301	3.08113	5.42208	3.20108e-06	0.000133855	4.3305	UP
XM_005676835.3	-0.650837	5.7319	-5.42133	3.20876e-06	0.000133962	4.19284	NOT
XM_018064642.1	-1.43955	1.44143	-5.41999	3.22258e-06	0.000134324	4.43113	DOWN
MSTRG.6061.1	2.42472	1.01995	5.41778	3.24539e-06	0.000134983	4.4381	UP
XM_018055750.1	-0.828917	5.28369	-5.41746	3.24874e-06	0.000134983	4.1894	NOT
XM_018066450.1	0.889789	6.17983	5.41628	3.26098e-06	0.000135276	4.17151	NOT
XM_018055943.1	1.6799	4.44404	5.4065	3.36467e-06	0.000139356	4.18271	UP
XM_018047851.1	1.01274	6.56166	5.40341	3.39805e-06	0.000140515	4.12736	UP
MSTRG.9467.1	-1.975	-0.0123909	-5.39732	3.46489e-06	0.000143053	4.39087	DOWN
MSTRG.10523.4	1.8813	1.0903	5.39561	3.48385e-06	0.000143608	4.35408	UP
XM_005684149.3	1.39231	0.487388	5.3915	3.52999e-06	0.000145281	4.36635	UP
XM_018065880.1	-1.5009	-0.0640479	-5.38925	3.55536e-06	0.000145868	4.36685	DOWN
XM_018045918.1	-0.910921	3.15302	-5.38925	3.55544e-06	0.000145868	4.20782	NOT
XM_005693412.3	-2.47446	0.163026	-5.38841	3.56498e-06	0.00014603	4.36419	DOWN
XM_018053073.1	2.43573	1.1053	5.38719	3.57896e-06	0.000146373	4.34961	UP
XM_018048606.1	-0.786897	5.50731	-5.38102	3.65024e-06	0.000149055	4.06906	NOT
XM_018059219.1	-1.55322	4.78748	-5.37566	3.71324e-06	0.00015139	4.07571	DOWN
XM_018048797.1	1.91022	3.30006	5.37203	3.7566e-06	0.000152878	4.1532	UP
XM_005691355.2	-0.638488	2.14656	-5.37163	3.76145e-06	0.000152878	4.24075	NOT
XM_018053074.1	1.44684	2.0397	5.36927	3.78994e-06	0.000153796	4.25213	UP
XM_018038925.1	-1.37939	6.9676	-5.36501	3.8418e-06	0.000155659	4.00094	DOWN
XM_018049137.1	2.84221	3.1806	5.36238	3.87431e-06	0.000156499	4.19524	UP
MSTRG.6234.6	3.035	1.00882	5.36236	3.87453e-06	0.000156499	4.27334	UP
XM_013968612.2	-0.922965	8.86257	-5.361	3.89139e-06	0.000156937	3.97319	NOT
XM_018042312.1	-0.863896	3.36	-5.3587	3.92004e-06	0.000157848	4.10191	NOT
XM_018041608.1	-1.45434	0.964669	-5.35529	3.96306e-06	0.000159334	4.2495	DOWN
XM_018044828.1	4.11602	3.06087	5.35246	3.99901e-06	0.000160533	4.15306	UP
XM_018043886.1	0.902963	1.22324	5.35163	4.00969e-06	0.000160714	4.21611	NOT
MSTRG.3613.2	-1.90286	0.240775	-5.34847	4.05025e-06	0.000162091	4.24471	DOWN
XM_018061848.1	-1.53138	5.69935	-5.34787	4.05805e-06	0.000162154	3.96283	DOWN
XM_018052563.1	1.39674	3.24864	5.34675	4.07258e-06	0.000162398	4.08251	UP
XM_005696038.2	-1.58414	2.1912	-5.34645	4.0766e-06	0.000162398	4.17193	DOWN
XM_005696302.2	-1.82738	-0.186174	-5.34343	4.116e-06	0.000163718	4.22955	DOWN
MSTRG.11599.6	2.9453	0.305938	5.34275	4.12499e-06	0.000163826	4.22107	UP
XM_018061457.1	1.61717	2.18718	5.34039	4.15618e-06	0.000164813	4.13678	UP
XM_018056176.1	2.10225	2.54992	5.33875	4.17798e-06	0.000165234	4.08252	UP
MSTRG.2115.1	1.63715	3.57291	5.33865	4.17944e-06	0.000165234	4.0131	UP
XM_013977098.2	1.13385	4.3788	5.3376	4.19344e-06	0.000165536	3.97809	UP
XM_005700776.3	1.77866	1.60622	5.33593	4.21591e-06	0.000166172	4.16018	UP
XM_013971575.2	1.26304	2.75879	5.33494	4.22917e-06	0.000166443	4.08341	UP
XM_005683003.3	1.5383	3.5836	5.33431	4.23773e-06	0.000166529	4.02729	UP
XM_018057835.1	1.19141	6.84471	5.32837	4.31885e-06	0.000169332	3.8869	UP
XM_018053181.1	2.51847	0.957972	5.32814	4.32205e-06	0.000169332	4.17625	UP
XM_005699018.3	-1.05744	1.3917	-5.32537	4.36043e-06	0.00017058	4.13326	DOWN
MSTRG.10524.1	0.955458	3.66214	5.32349	4.38666e-06	0.000171349	3.9461	NOT
XM_018056591.1	1.07356	6.29716	5.3227	4.39784e-06	0.000171529	3.87628	UP
XM_018060015.1	0.9031	4.64235	5.32189	4.40916e-06	0.000171714	3.90643	NOT
XM_005684574.3	2.70487	0.308025	5.32137	4.41654e-06	0.000171745	4.15034	UP
XM_018041260.1	-1.33709	3.54471	-5.32034	4.43098e-06	0.00017205	3.98075	DOWN
XM_005676158.2	-1.18092	1.49805	-5.31659	4.48438e-06	0.000173865	4.11396	DOWN
XM_018048366.1	1.15406	3.3032	5.31202	4.55028e-06	0.000176158	3.97424	UP
XM_018061727.1	1.48244	0.859014	5.30804	4.60849e-06	0.000178147	4.10097	UP
XM_018064698.1	-1.38538	2.49172	-5.30612	4.63675e-06	0.000178975	4.02605	DOWN
XM_005709644.3	1.04168	6.75737	5.30445	4.66159e-06	0.000179668	3.81363	UP
XM_018063018.1	1.6747	1.65631	5.30127	4.70922e-06	0.000181236	4.05339	UP
XM_018054039.1	2.07332	0.0278624	5.29939	4.73753e-06	0.000181975	4.09681	UP
MSTRG.3040.3	1.92547	0.854583	5.29907	4.74238e-06	0.000181975	4.07584	UP
XM_018046572.1	-0.774298	3.39526	-5.29703	4.77337e-06	0.000182895	3.90268	NOT
MSTRG.10378.2	4.49667	4.19874	5.29343	4.8284e-06	0.000184732	3.90606	UP
XM_013965670.2	3.76962	2.0215	5.29156	4.85743e-06	0.000185571	4.02537	UP
XM_005691571.3	1.07777	5.38639	5.28906	4.89624e-06	0.00018678	3.78496	UP
XM_005692612.3	-1.42835	2.05069	-5.28682	4.93141e-06	0.000187847	3.98911	DOWN
XM_005676159.3	-1.24599	3.14672	-5.28274	4.99605e-06	0.000190032	3.9091	DOWN
MSTRG.4625.8	1.37973	2.87557	5.28069	5.02883e-06	0.000191	3.89385	UP
XM_018060661.1	1.07191	0.811113	5.27821	5.06871e-06	0.000191962	4.01307	UP
XM_018048227.1	1.10093	3.29531	5.2782	5.06887e-06	0.000191962	3.86735	UP
XM_018051370.1	1.13479	4.78122	5.27774	5.07631e-06	0.000191965	3.76269	UP
XM_018041939.1	-1.54713	1.2619	-5.27636	5.09871e-06	0.000192534	3.98662	DOWN
MSTRG.8373.1	-1.50693	2.39417	-5.27576	5.10843e-06	0.000192622	3.94016	DOWN
XM_013975269.2	5.7413	2.5474	5.27468	5.12619e-06	0.000193013	3.96784	UP
XM_018053108.1	1.24167	1.75845	5.27073	5.19122e-06	0.000195179	3.92977	UP
XM_005693351.3	1.2316	4.94107	5.26763	5.2427e-06	0.000196831	3.73249	UP
XM_005685503.3	1.17641	6.01151	5.26661	5.25981e-06	0.00019714	3.70348	UP
XM_018060737.1	1.80011	0.432061	5.26624	5.26603e-06	0.00019714	3.98628	UP
MSTRG.2734.2	2.095	0.450421	5.26422	5.30011e-06	0.000198132	3.98457	UP
MSTRG.7590.2	2.57357	0.997142	5.25976	5.376e-06	0.000200681	3.95261	UP
XM_005680231.3	-1.42988	1.21096	-5.25843	5.39887e-06	0.000201247	3.95423	DOWN
MSTRG.15957.2	2.9017	2.78195	5.25619	5.43744e-06	0.000202395	3.85851	UP
XM_018060244.1	1.33548	4.37839	5.25432	5.46997e-06	0.000203316	3.72171	UP
XM_018049128.1	7.50919	8.08767	5.24833	5.57553e-06	0.000206945	3.65463	UP
MSTRG.3182.1	-1.13135	1.83126	-5.24737	5.59256e-06	0.000207136	3.88432	DOWN
XM_018065686.1	3.00681	1.72657	5.24715	5.59655e-06	0.000207136	3.89687	UP
XM_005677361.3	1.12836	5.05011	5.24551	5.62585e-06	0.000207919	3.66237	UP
MSTRG.5476.5	3.65266	2.92502	5.24508	5.63364e-06	0.000207919	3.8106	UP
XM_018043532.1	-1.64407	0.522343	-5.24025	5.72088e-06	0.00021044	3.91916	DOWN
MSTRG.4595.1	-1.15256	4.71546	-5.23992	5.72707e-06	0.00021044	3.65068	DOWN
MSTRG.14195.4	2.90174	1.8914	5.23972	5.73066e-06	0.00021044	3.83284	UP
XM_018049626.1	-3.93706	2.59248	-5.23952	5.73422e-06	0.00021044	3.89368	DOWN
MSTRG.10859.1	-2.23381	-0.279239	-5.23886	5.74631e-06	0.000210489	3.91807	DOWN
XM_005698968.3	1.03896	3.44367	5.23831	5.75641e-06	0.000210489	3.72651	UP
XM_005684808.3	-1.31748	2.97884	-5.23796	5.76291e-06	0.000210489	3.76604	DOWN
XM_005684263.3	-2.11187	0.0942641	-5.23769	5.76781e-06	0.000210489	3.91383	DOWN
XM_018048130.1	-0.796797	3.45069	-5.23597	5.79951e-06	0.00021135	3.70196	NOT
XM_018044026.1	6.18891	4.44344	5.23308	5.85327e-06	0.000213012	3.74934	UP
XM_005676883.3	-1.38396	5.88683	-5.23103	5.89151e-06	0.000214105	3.59607	DOWN
XM_018060379.1	-1.85332	1.08035	-5.22902	5.92946e-06	0.000215184	3.87398	DOWN
XM_018050801.1	-1.33582	1.57798	-5.22801	5.94864e-06	0.00021558	3.83437	DOWN
NM_001291698.1	1.21385	2.28156	5.2249	6.00786e-06	0.000217425	3.76436	UP
XM_018058267.1	-1.57564	-0.00375826	-5.22436	6.01822e-06	0.000217498	3.87496	DOWN
XM_005681847.3	-1.86619	3.77	-5.22077	6.08737e-06	0.000219692	3.66938	DOWN
XM_018040887.1	-0.73435	3.01602	-5.21943	6.11341e-06	0.000220328	3.70643	NOT
XM_018062600.1	3.19611	0.488669	5.21599	6.18075e-06	0.000222447	3.82498	UP
XM_018054288.1	-1.08052	8.10117	-5.2132	6.23599e-06	0.000224126	3.51815	DOWN
XM_005700681.3	-1.2809	4.62591	-5.21202	6.2595e-06	0.000224662	3.57148	DOWN
XM_005691015.3	0.660862	5.07516	5.21109	6.27809e-06	0.00022502	3.54754	NOT
XM_018048739.1	-1.53798	4.80362	-5.20888	6.32227e-06	0.000226093	3.56328	DOWN
XM_005680826.3	-1.41465	0.819909	-5.20873	6.32536e-06	0.000226093	3.81363	DOWN
XM_018040147.1	-1.14379	1.82831	-5.20625	6.37556e-06	0.000227367	3.75287	DOWN
MSTRG.9723.3	2.32471	3.93756	5.20599	6.38075e-06	0.000227367	3.62764	UP
XM_018047722.1	-1.65342	2.12617	-5.20568	6.38714e-06	0.000227367	3.72398	DOWN
XM_018039607.1	0.581665	4.88104	5.20021	6.49931e-06	0.000231044	3.51766	NOT
XM_005695851.3	1.41344	1.70419	5.19952	6.51374e-06	0.000231242	3.73471	UP
XM_018049812.1	0.904927	4.39201	5.19905	6.52346e-06	0.000231273	3.53391	NOT
XM_018055515.1	1.12173	1.26222	5.1975	6.55571e-06	0.000232093	3.74687	UP
XM_005687981.3	-1.79795	2.50036	-5.19708	6.56439e-06	0.000232093	3.70456	DOWN
MSTRG.14195.2	2.96416	0.74721	5.19215	6.66833e-06	0.000235449	3.7539	UP
XM_005698544.3	-1.60817	-0.564529	-5.18497	6.82253e-06	0.000240568	3.75759	DOWN
XM_018064308.1	2.29024	2.37849	5.18352	6.85409e-06	0.000241355	3.65449	UP
XM_005699902.3	-1.72872	4.88049	-5.18136	6.90147e-06	0.000242696	3.47224	DOWN
MSTRG.8821.1	1.02172	1.72802	5.18002	6.93076e-06	0.000243397	3.66801	UP
XM_018049132.1	8.58115	6.01397	5.17804	6.97461e-06	0.000244595	3.60399	UP
MSTRG.3159.1	8.7898	5.0368	5.17764	6.98362e-06	0.000244595	3.66615	UP
XM_018051749.1	1.33347	1.57314	5.17163	7.11842e-06	0.000248983	3.65733	UP
XM_018055526.1	1.21854	3.03346	5.16601	7.24683e-06	0.000253135	3.52096	UP
XM_018065558.1	-1.30361	2.26657	-5.16497	7.27085e-06	0.000253351	3.59693	DOWN
XM_018056181.1	-1.05703	4.12637	-5.16453	7.28101e-06	0.000253351	3.46113	DOWN
XM_018044779.1	0.816953	6.4745	5.16448	7.28217e-06	0.000253351	3.38309	NOT
XR_310091.3	-0.891619	3.29755	-5.16337	7.30794e-06	0.000253746	3.51052	NOT
XM_018057962.1	-0.699774	3.38844	-5.16297	7.31725e-06	0.000253746	3.48122	NOT
MSTRG.10698.1	1.72922	1.70418	5.16274	7.32269e-06	0.000253746	3.62147	UP
XM_005690519.3	0.93946	3.4425	5.16167	7.34775e-06	0.000254277	3.45903	NOT
XM_005684052.3	-2.42733	-0.0638882	-5.16122	7.35819e-06	0.000254301	3.68686	DOWN
MSTRG.13415.1	2.28889	-0.0867547	5.15503	7.5046e-06	0.000259018	3.65644	UP
MSTRG.12206.2	1.68604	2.2078	5.15333	7.5452e-06	0.000260075	3.56705	UP
XM_018055606.1	1.65655	1.21069	5.15079	7.60646e-06	0.000261841	3.59139	UP
MSTRG.6610.2	2.18621	0.375762	5.1477	7.68157e-06	0.000264078	3.64018	UP
XM_013971727.2	-1.06517	1.64021	-5.13985	7.87557e-06	0.000270391	3.57125	DOWN
MSTRG.9443.2	3.3053	0.401128	5.13934	7.88855e-06	0.000270481	3.60135	UP
MSTRG.4784.1	-1.95285	-0.143431	-5.1388	7.9021e-06	0.00027059	3.62116	DOWN
MSTRG.4579.6	-2.58649	0.603868	-5.1377	7.9297e-06	0.000270907	3.61367	DOWN
XM_013962894.2	-1.42696	6.87131	-5.1376	7.93211e-06	0.000270907	3.29655	DOWN
MSTRG.2273.3	-1.32677	1.84386	-5.13617	7.96825e-06	0.000271785	3.54728	DOWN
MSTRG.3619.4	-2.09616	-0.224894	-5.13561	7.98262e-06	0.000271858	3.61148	DOWN
XM_018048898.1	-0.901838	1.82652	-5.13527	7.99124e-06	0.000271858	3.54856	NOT
XM_018056175.1	2.42666	0.697748	5.13381	8.02837e-06	0.000272766	3.55834	UP
XR_001919063.1	1.24596	2.89988	5.13192	8.07665e-06	0.00027405	3.44395	UP
MSTRG.716.1	-0.882766	1.60991	-5.13067	8.10891e-06	0.000274787	3.53395	NOT
XM_018043745.1	-1.158	5.2135	-5.12947	8.13996e-06	0.000275481	3.29394	DOWN
XR_001296830.2	1.49023	2.09913	5.12716	8.19987e-06	0.000277111	3.50628	UP
XM_005698922.3	2.0448	2.41791	5.1268	8.20935e-06	0.000277111	3.46855	UP
XM_018063562.1	5.39084	2.28538	5.1233	8.30106e-06	0.000279844	3.51695	UP
XR_001918586.1	2.05331	0.851434	5.12139	8.35171e-06	0.000281188	3.54656	UP
XM_013966567.2	-0.989632	2.96931	-5.12069	8.37025e-06	0.00028145	3.41534	NOT
XM_018062766.1	-1.71084	-0.131873	-5.11983	8.39316e-06	0.000281857	3.56445	DOWN
MSTRG.2101.2	-1.84674	-0.181533	-5.11646	8.48342e-06	0.000284522	3.55406	DOWN
XM_018057750.1	2.42284	2.22632	5.11587	8.49933e-06	0.000284689	3.46312	UP
XM_018042241.1	-2.08063	1.07668	-5.11144	8.61993e-06	0.000288359	3.53155	DOWN
MSTRG.13488.1	-1.43582	1.63705	-5.11027	8.65197e-06	0.00028906	3.47219	DOWN
XM_018047352.1	-1.28389	3.14665	-5.10919	8.68167e-06	0.000289682	3.353	DOWN
MSTRG.14997.2	0.883687	2.72914	5.10796	8.71568e-06	0.000290445	3.36221	NOT
XM_018052960.1	1.93661	4.08702	5.1071	8.73963e-06	0.000290871	3.29621	UP
XM_018059370.1	2.0049	1.33442	5.1065	8.75634e-06	0.000291056	3.4707	UP
MSTRG.4454.2	3.43315	1.43421	5.10562	8.78093e-06	0.000291502	3.48571	UP
XM_005680814.3	-0.788397	3.23046	-5.10303	8.85347e-06	0.000293537	3.33883	NOT
MSTRG.7943.1	3.21309	4.58859	5.10211	8.87915e-06	0.000294015	3.26703	UP
XM_018050678.1	-1.19642	1.03507	-5.09855	8.98023e-06	0.000296743	3.47435	DOWN
XM_018053423.1	-1.38206	1.67819	-5.09841	8.98429e-06	0.000296743	3.44872	DOWN
XM_018048385.1	-2.56148	3.22926	-5.09324	9.13289e-06	0.00030127	3.34747	DOWN
XM_005694080.3	-0.697031	5.12743	-5.09261	9.15129e-06	0.000301496	3.18538	NOT
XM_018054431.1	-1.8732	2.87289	-5.09175	9.17627e-06	0.000301937	3.33344	DOWN
XM_018047657.1	2.39743	3.00269	5.08905	9.25523e-06	0.000304013	3.2801	UP
XM_018050939.1	-1.78596	1.3367	-5.0888	9.26265e-06	0.000304013	3.43404	DOWN
XM_005680092.3	-1.19565	5.08105	-5.08704	9.31446e-06	0.00030533	3.17244	DOWN
XM_005677205.3	-1.31045	2.10951	-5.08382	9.41033e-06	0.000307925	3.36414	DOWN
XM_018055846.1	2.77703	4.07808	5.08359	9.41724e-06	0.000307925	3.23029	UP
XM_018043448.1	-1.17928	3.26245	-5.08255	9.44837e-06	0.000308556	3.25898	DOWN
MSTRG.4075.2	2.73335	0.142118	5.07864	9.56624e-06	0.000312015	3.42999	UP
XM_018064796.1	2.47923	0.491172	5.0746	9.6899e-06	0.000315654	3.41879	UP
XM_018044771.1	1.15841	2.12076	5.07177	9.77731e-06	0.000318104	3.32351	UP
XM_018048983.1	1.86415	3.09669	5.07126	9.79313e-06	0.000318222	3.25995	UP
XM_005681445.3	2.41755	0.877284	5.06756	9.90866e-06	0.000321576	3.37802	UP
XM_005696600.3	-2.05238	3.42133	-5.0663	9.94836e-06	0.000322358	3.1968	DOWN
MSTRG.1393.2	1.51794	1.53899	5.06601	9.95748e-06	0.000322358	3.33859	UP
XM_018048438.1	-2.0143	2.94908	-5.06376	1.00288e-05	0.000324263	3.26188	DOWN
MSTRG.9144.2	-2.06062	0.0466102	-5.06133	1.01066e-05	0.000326375	3.38731	DOWN
XM_005689890.3	-1.18355	4.23302	-5.05723	1.02389e-05	0.000330239	3.11137	DOWN
XM_005687722.3	-1.69265	1.34096	-5.05352	1.036e-05	0.000333732	3.31709	DOWN
MSTRG.760.2	-2.23534	1.84477	-5.05311	1.03735e-05	0.000333757	3.2942	DOWN
MSTRG.12927.1	-1.29548	3.38953	-5.05242	1.03962e-05	0.000334073	3.15059	DOWN
XM_013964694.2	5.25884	3.57931	5.05137	1.0431e-05	0.000334781	3.19062	UP
MSTRG.15243.1	-1.53614	1.22927	-5.04647	1.05943e-05	0.000339494	3.30909	DOWN
XM_005679931.3	-1.08966	7.23171	-5.04619	1.06039e-05	0.000339494	3.00844	DOWN
XM_018044524.1	1.5292	0.907638	5.04485	1.06489e-05	0.000340518	3.31205	UP
XM_018048882.1	-1.37471	2.26839	-5.04021	1.08068e-05	0.00034467	3.20568	DOWN
MSTRG.1256.1	2.82719	1.26122	5.0402	1.0807e-05	0.00034467	3.30943	UP
XM_005694718.3	1.46475	2.29167	5.03987	1.08184e-05	0.00034467	3.19838	UP
XM_005694562.3	2.69881	1.67546	5.03938	1.08351e-05	0.000344781	3.26011	UP
XM_018048990.1	2.52098	0.304323	5.03833	1.08714e-05	0.000345515	3.29231	UP
XM_018057155.1	-1.05787	8.89226	-5.03553	1.09684e-05	0.000348174	2.9585	DOWN
XM_013973428.2	-0.802379	3.36199	-5.0351	1.09832e-05	0.000348221	3.09552	NOT
XM_018048899.1	-1.67284	5.20804	-5.03335	1.10442e-05	0.00034973	3.00473	DOWN
XM_018065069.1	2.33636	2.0813	5.03075	1.11359e-05	0.000352204	3.16831	UP
XM_018038609.1	1.54286	2.45796	5.02992	1.11651e-05	0.000352414	3.17878	UP
XM_005678691.2	-1.50192	0.494563	-5.02979	1.11695e-05	0.000352414	3.2918	DOWN
MSTRG.15044.4	-2.16731	-0.0516919	-5.02873	1.12071e-05	0.000353173	3.29397	DOWN
XM_018054293.1	1.84957	1.16119	5.02564	1.13174e-05	0.000356184	3.24469	UP
NM_001285603.1	2.0809	2.99908	5.02529	1.133e-05	0.000356184	3.07883	UP
XM_018066331.1	2.47884	0.216377	5.02485	1.13459e-05	0.000356255	3.26249	UP
XM_018049856.1	2.44155	0.323318	5.02414	1.13716e-05	0.000356633	3.25166	UP
XM_018057058.1	-0.909552	2.51509	-5.02085	1.14906e-05	0.000359932	3.14394	NOT
XM_018047687.1	2.37123	0.998224	5.02015	1.15161e-05	0.0003603	3.23649	UP
MSTRG.17103.3	2.51793	1.16134	5.01864	1.15713e-05	0.000361592	3.22661	UP
XM_005686683.3	-1.67378	-0.0083731	-5.01818	1.15885e-05	0.000361697	3.26359	DOWN
XM_005686825.3	-1.32059	2.3158	-5.01711	1.16278e-05	0.000362489	3.1544	DOWN
MSTRG.12031.2	1.50637	1.5614	5.01462	1.17198e-05	0.000364923	3.19892	UP
XM_013972207.2	-1.77174	1.10758	-5.01299	1.17804e-05	0.000366371	3.23648	DOWN
MSTRG.6090.1	2.92438	1.73091	5.01091	1.18583e-05	0.000368354	3.16417	UP
XM_005699555.2	-0.916869	4.41238	-5.0079	1.19721e-05	0.000371448	2.93653	NOT
XM_018055758.1	1.23188	0.995385	5.0056	1.20594e-05	0.000373711	3.17277	UP
XM_005686002.3	1.57614	1.24276	5.00362	1.21353e-05	0.000375617	3.16796	UP
XM_018063884.1	-1.65854	-0.0881468	-5.00323	1.21504e-05	0.000375641	3.2195	DOWN
MSTRG.1430.1	-1.90979	0.192102	-5.0011	1.22325e-05	0.00037773	3.21124	DOWN
XM_005678467.3	-1.66842	3.06121	-4.99991	1.22788e-05	0.000378098	3.03868	DOWN
XM_005675123.3	-1.34516	2.91809	-4.99975	1.2285e-05	0.000378098	3.04711	DOWN
MSTRG.1882.1	2.17096	0.432502	4.99968	1.22879e-05	0.000378098	3.19524	UP
XM_018049704.1	1.56815	0.990906	4.99422	1.25021e-05	0.000384238	3.13452	UP
XM_018042364.1	2.15467	-0.0477156	4.99377	1.252e-05	0.000384335	3.17788	UP
XM_005695648.2	-1.17852	3.91502	-4.99332	1.25375e-05	0.000384421	2.94257	DOWN
XR_001296116.2	2.57125	0.70777	4.99181	1.25979e-05	0.000385435	3.14785	UP
XM_018038315.1	2.60721	5.23863	4.99175	1.26002e-05	0.000385435	2.86861	UP
MSTRG.9450.1	1.06622	2.83629	4.99113	1.26251e-05	0.000385745	3.0017	UP
MSTRG.6534.5	3.23084	0.618674	4.99022	1.26615e-05	0.000386405	3.13473	UP
XM_005689888.3	5.17882	5.65416	4.98867	1.27238e-05	0.000387854	2.92207	UP
XM_018057690.1	-1.31536	2.25298	-4.98756	1.27684e-05	0.000388634	3.06556	DOWN
XM_005686511.3	1.28864	2.18593	4.98729	1.27792e-05	0.000388634	3.04301	UP
XM_005678994.3	1.73373	2.11739	4.98623	1.28225e-05	0.000389496	3.04582	UP
XM_005675355.3	-1.74753	0.686854	-4.98582	1.28388e-05	0.000389539	3.16085	DOWN
XM_005689454.3	-1.31119	1.70174	-4.98446	1.28945e-05	0.000390774	3.09282	DOWN
MSTRG.16386.1	3.12766	2.30775	4.984	1.29131e-05	0.000390828	3.04462	UP
MSTRG.10527.1	2.36183	0.128648	4.98368	1.29262e-05	0.000390828	3.14812	UP
XM_018063560.1	5.01671	3.51916	4.98313	1.29488e-05	0.000391058	3.06412	UP
XM_018047708.1	0.730721	4.90175	4.98125	1.30261e-05	0.000392936	2.84138	NOT
MSTRG.5807.2	1.51503	1.99348	4.98017	1.30707e-05	0.000393827	3.0385	UP
XM_005696367.3	2.43548	0.335849	4.9794	1.31025e-05	0.000394328	3.12158	UP
MSTRG.3884.7	1.47785	0.930351	4.97839	1.31443e-05	0.000395132	3.09949	UP
XM_018049875.1	-1.93724	3.22661	-4.97761	1.31771e-05	0.000395661	2.96962	DOWN
XM_005677144.3	2.82358	3.7041	4.97604	1.32425e-05	0.00039717	2.91413	UP
XM_018045665.1	-0.819371	3.26639	-4.97247	1.3393e-05	0.000401221	2.91627	NOT
MSTRG.10202.2	-1.60979	0.174215	-4.97205	1.34107e-05	0.000401292	3.12365	DOWN
XM_018059855.1	-0.869948	3.6422	-4.97145	1.34364e-05	0.000401599	2.89244	NOT
XM_018053274.1	1.81969	5.76421	4.96789	1.35885e-05	0.00040568	2.77976	UP
MSTRG.15835.12	2.31268	0.162923	4.96624	1.36594e-05	0.000406926	3.08804	UP
MSTRG.8299.2	2.35953	0.150757	4.96583	1.36773e-05	0.000406926	3.0972	UP
MSTRG.5529.1	2.90434	2.66321	4.96555	1.36894e-05	0.000406926	2.95304	UP
MSTRG.10519.9	-1.56997	-0.0941359	-4.96548	1.36926e-05	0.000406926	3.10988	DOWN
MSTRG.11363.1	-1.49697	0.552084	-4.96194	1.38468e-05	0.000410697	3.07827	DOWN
MSTRG.9538.1	0.723389	3.83494	4.96184	1.3851e-05	0.000410697	2.83733	NOT
XM_005690076.3	-0.692317	2.59907	-4.96014	1.39257e-05	0.000412444	2.94983	NOT
XM_005684767.3	-1.77821	-0.389763	-4.9548	1.4163e-05	0.000418603	3.0768	DOWN
XM_018057447.1	-0.67352	5.98616	-4.95474	1.41657e-05	0.000418603	2.74141	NOT
XM_018059740.1	0.73382	3.80321	4.9543	1.41853e-05	0.000418708	2.81143	NOT
XM_018053182.1	2.13559	0.706489	4.95171	1.43021e-05	0.000421676	3.04559	UP
XM_005675001.3	-1.08198	3.4142	-4.94835	1.44545e-05	0.00042569	2.83942	DOWN
XM_005687817.3	1.28793	2.76827	4.94798	1.44715e-05	0.000425709	2.8783	UP
XM_018055823.1	1.00584	4.05341	4.94396	1.46567e-05	0.000430672	2.76862	UP
MSTRG.7069.1	2.48546	1.93545	4.94158	1.47676e-05	0.00043321	2.90133	UP
XM_005680900.3	0.529655	4.33056	4.94139	1.47763e-05	0.00043321	2.74282	NOT
XM_005683019.3	-0.742361	2.12862	-4.93984	1.48488e-05	0.000434848	2.9198	NOT
XM_018059373.1	1.49344	0.252614	4.9394	1.48697e-05	0.000434941	3.01079	UP
XM_013965970.2	1.51932	2.48831	4.93906	1.48853e-05	0.000434941	2.88561	UP
MSTRG.6607.1	-2.28639	2.28788	-4.93761	1.49537e-05	0.000436452	2.90171	DOWN
XM_018038869.1	1.91482	-0.212353	4.9354	1.50587e-05	0.000439024	3.007	UP
XM_018045927.1	2.91785	2.56614	4.93486	1.50843e-05	0.000439279	2.90459	UP
MSTRG.6326.1	4.02084	3.19373	4.93447	1.51032e-05	0.00043934	2.85373	UP
XM_018061087.1	-1.00509	3.7813	-4.93365	1.5142e-05	0.000439979	2.76792	DOWN
MSTRG.5862.1	-0.976019	2.86769	-4.93206	1.52184e-05	0.000441556	2.8296	NOT
MSTRG.5729.3	-0.983605	3.63391	-4.93182	1.52302e-05	0.000441556	2.76253	NOT
XM_018061101.1	0.792153	3.42098	4.93028	1.53043e-05	0.000443213	2.78601	NOT
MSTRG.3887.2	3.25188	0.791845	4.92965	1.53348e-05	0.000443604	2.96184	UP
XM_018047869.1	0.817885	4.01131	4.92831	1.53999e-05	0.000444976	2.72679	NOT
XM_018042043.1	-1.39069	4.26788	-4.92797	1.54163e-05	0.000444976	2.71423	DOWN
XM_005690462.3	-2.47802	1.48711	-4.92735	1.54467e-05	0.00044536	2.97507	DOWN
XM_018046609.1	-0.937737	3.14461	-4.92686	1.54706e-05	0.000445556	2.78018	NOT
XM_005675421.3	-2.11147	0.0634552	-4.92593	1.55163e-05	0.000445579	2.99177	DOWN
NM_001285629.1	5.54776	5.71746	4.92586	1.55194e-05	0.000445579	2.74567	UP
XM_018065761.1	-1.25823	2.06792	-4.9258	1.55226e-05	0.000445579	2.87324	DOWN
XM_018052864.1	1.44913	1.25262	4.92498	1.55628e-05	0.000446241	2.92814	UP
XM_018062557.1	0.93849	4.95208	4.9241	1.56063e-05	0.000446997	2.66366	NOT
XM_005690080.3	2.95436	5.59474	4.92016	1.58013e-05	0.000452086	2.67502	UP
XM_018043085.1	1.52584	2.49395	4.91947	1.58358e-05	0.000452577	2.80253	UP
XM_005686076.3	-0.911794	6.328	-4.91824	1.58974e-05	0.000453841	2.62481	NOT
XM_005699221.3	-0.971593	3.45767	-4.91662	1.59789e-05	0.000455668	2.72696	NOT
XM_018058313.1	-0.768834	5.56756	-4.91259	1.61839e-05	0.000460698	2.61791	NOT
XM_018038954.1	0.613638	5.02518	4.91246	1.61905e-05	0.000460698	2.629	NOT
XM_005691820.3	-1.55069	2.4329	-4.91161	1.6234e-05	0.00046143	2.81057	DOWN
XM_018066208.1	-1.12321	2.50527	-4.91037	1.62975e-05	0.000462733	2.80747	DOWN
XM_018057024.1	1.11533	0.827794	4.90897	1.63699e-05	0.000463802	2.89622	UP
XM_005676662.3	-2.00066	0.146434	-4.90895	1.63707e-05	0.000463802	2.94114	DOWN
XM_005692283.3	-1.68997	4.30929	-4.90588	1.65301e-05	0.000467808	2.6423	DOWN
XM_018048174.1	2.23978	0.865655	4.90394	1.66316e-05	0.000470171	2.89555	UP
XM_018056145.1	1.05866	5.6374	4.90305	1.66788e-05	0.000470994	2.5857	UP
XM_013963597.2	2.05731	1.84351	4.90104	1.67846e-05	0.000473471	2.8053	UP
MSTRG.11599.2	5.50645	1.51645	4.89834	1.69282e-05	0.000476957	2.84202	UP
MSTRG.10948.3	1.40468	1.92915	4.89803	1.69447e-05	0.000476957	2.79104	UP
MSTRG.8587.2	2.3235	0.345316	4.89708	1.69959e-05	0.000477882	2.86655	UP
XM_005693666.3	0.485356	5.04491	4.89638	1.70333e-05	0.000478269	2.57347	NOT
XM_018044974.1	-1.05019	5.93798	-4.89613	1.70471e-05	0.000478269	2.55724	DOWN
XM_018048261.1	-1.60266	0.0626633	-4.8958	1.70647e-05	0.000478269	2.9009	DOWN
XM_018063938.1	1.53028	1.22741	4.89471	1.71233e-05	0.000479397	2.83798	UP
XM_018048419.1	1.03707	1.666	4.89202	1.72692e-05	0.000482214	2.78398	UP
MSTRG.12526.5	2.37502	2.66456	4.89195	1.72732e-05	0.000482214	2.74243	UP
XM_013973992.2	-0.800139	6.46099	-4.89184	1.72793e-05	0.000482214	2.53912	NOT
XM_018053079.1	-0.705731	1.2542	-4.88889	1.74407e-05	0.000486197	2.82888	NOT
XM_005689554.3	-1.10876	3.16089	-4.88557	1.76244e-05	0.000490795	2.66755	DOWN
XM_018053353.1	2.52033	0.225766	4.88288	1.77747e-05	0.00049445	2.85028	UP
MSTRG.6965.2	2.36543	0.097561	4.88166	1.78434e-05	0.000495833	2.83752	UP
XM_018051015.1	-0.886097	3.55119	-4.8809	1.78859e-05	0.000496487	2.60898	NOT
MSTRG.16834.3	1.53016	0.409611	4.87893	1.79974e-05	0.000498842	2.83461	UP
MSTRG.6692.5	-1.63367	-0.00375826	-4.87873	1.8009e-05	0.000498842	2.85276	DOWN
XM_005684958.3	2.33852	1.91379	4.87565	1.81846e-05	0.000502785	2.76457	UP
XM_005688486.3	2.25008	1.79991	4.87523	1.8209e-05	0.000502785	2.72859	UP
XM_005678578.3	2.46121	2.3909	4.87522	1.82092e-05	0.000502785	2.68945	UP
XM_018038210.1	-1.89102	-0.384269	-4.87392	1.8284e-05	0.000504318	2.84032	DOWN
MSTRG.9492.2	2.38705	1.16844	4.87315	1.83285e-05	0.000505012	2.75376	UP
XM_005683859.3	-1.38751	0.66984	-4.87259	1.8361e-05	0.000505372	2.82268	DOWN
XR_001918560.1	-1.2285	2.2426	-4.87191	1.84004e-05	0.000505924	2.72849	DOWN
MSTRG.4572.9	1.9587	0.744156	4.87087	1.84606e-05	0.000506605	2.78306	UP
MSTRG.1448.1	-1.54787	2.10882	-4.87081	1.8464e-05	0.000506605	2.7384	DOWN
MSTRG.11902.1	-1.32693	1.65694	-4.87007	1.85071e-05	0.000506925	2.77058	DOWN
XM_018048277.1	2.19548	0.98925	4.86995	1.85145e-05	0.000506925	2.79293	UP
XM_005697064.3	-1.36879	2.059	-4.86942	1.85452e-05	0.000507232	2.73534	DOWN
XM_018045145.1	2.25359	1.02013	4.868	1.86286e-05	0.000508979	2.7781	UP
MSTRG.7766.1	6.11476	6.88773	4.86695	1.86906e-05	0.000510139	2.57103	UP
XM_018041331.1	1.5246	0.894059	4.86492	1.88104e-05	0.000512874	2.77324	UP
XM_018062791.1	-1.13022	3.93789	-4.86416	1.88557e-05	0.000513571	2.54234	DOWN
MSTRG.7891.1	-1.28757	1.16752	-4.8619	1.89903e-05	0.000516698	2.7699	DOWN
XM_005691967.3	-1.92176	0.793031	-4.85925	1.91496e-05	0.000520491	2.78455	DOWN
MSTRG.16820.1	-1.22308	2.81995	-4.8582	1.92127e-05	0.000521555	2.61131	DOWN
XM_018051816.1	-1.20753	1.40743	-4.85794	1.92288e-05	0.000521555	2.75315	DOWN
XM_018058561.1	2.38337	2.27106	4.85715	1.92765e-05	0.000522308	2.63459	UP
XM_018049028.1	2.63327	0.0427083	4.85494	1.94114e-05	0.000525344	2.75921	UP
XM_018065685.1	2.45974	1.89927	4.85454	1.94358e-05	0.000525344	2.68827	UP
MSTRG.16016.6	1.61701	2.50744	4.85432	1.94493e-05	0.000525344	2.61386	UP
MSTRG.3147.9	-1.86233	-0.0541396	-4.854	1.94691e-05	0.000525344	2.77843	DOWN
MSTRG.634.1	-1.73102	2.12126	-4.84657	1.99299e-05	0.00053642	2.66835	DOWN
XM_018040657.1	1.1346	4.60034	4.84654	1.99317e-05	0.00053642	2.44612	UP
XM_018045910.1	-0.88537	1.97406	-4.84639	1.99413e-05	0.00053642	2.66229	NOT
MSTRG.2443.1	-1.63057	0.846013	-4.84474	2.00456e-05	0.000538671	2.72793	DOWN
XR_001918676.1	-0.798772	5.73386	-4.84396	2.00946e-05	0.000539026	2.40246	NOT
XM_018055520.1	-1.23123	3.21165	-4.84387	2.01001e-05	0.000539026	2.55201	DOWN
MSTRG.15457.1	-1.72328	0.0941348	-4.83974	2.03635e-05	0.000545529	2.73972	DOWN
XM_018061204.1	-1.04398	2.05408	-4.83837	2.04512e-05	0.000547316	2.61789	DOWN
XR_001919428.1	1.32629	1.78693	4.83672	2.05581e-05	0.000549572	2.61647	UP
MSTRG.7449.2	3.01508	0.876378	4.83642	2.05776e-05	0.000549572	2.69269	UP
XM_018039497.1	-0.912757	3.35816	-4.83422	2.07204e-05	0.00055282	2.48287	NOT
XM_018041731.1	2.59056	1.06254	4.83262	2.08249e-05	0.00055504	2.65876	UP
XM_018043763.1	1.77079	1.81239	4.83205	2.08627e-05	0.000555287	2.58169	UP
XM_005688548.3	-1.36789	3.81612	-4.83183	2.08767e-05	0.000555287	2.45056	DOWN
MSTRG.16372.1	1.32735	3.96349	4.82928	2.10454e-05	0.000559203	2.44428	UP
XM_005700790.3	1.96939	4.08582	4.82749	2.11643e-05	0.000561789	2.41102	UP
XM_018058028.1	0.704349	2.40876	4.82643	2.12351e-05	0.000563098	2.56181	NOT
XM_018044218.1	1.4767	2.06439	4.82558	2.1292e-05	0.000564033	2.58774	UP
XM_005675030.3	-1.27926	2.99334	-4.82469	2.13516e-05	0.000565038	2.50143	DOWN
XM_018052164.1	1.59935	2.88176	4.82142	2.15724e-05	0.000570304	2.47841	UP
MSTRG.5491.2	2.24194	0.304179	4.82092	2.16064e-05	0.000570624	2.66279	UP
XM_018051412.1	-1.0554	2.2794	-4.81971	2.16886e-05	0.000572215	2.55219	DOWN
XM_005681395.3	-1.42734	1.52802	-4.81455	2.20438e-05	0.000581	2.60836	DOWN
MSTRG.15645.1	2.62604	1.73205	4.81322	2.21362e-05	0.000582845	2.58618	UP
XM_018053685.1	2.02454	0.108484	4.80916	2.24211e-05	0.000589752	2.62109	UP
XM_005677142.3	-0.634874	3.72615	-4.80874	2.24506e-05	0.000589933	2.38627	NOT
XM_018055299.1	-1.87214	0.149168	-4.80634	2.26208e-05	0.000593257	2.6357	DOWN
XM_018057082.1	0.671947	3.35836	4.80631	2.26226e-05	0.000593257	2.39487	NOT
XM_005692844.3	1.41157	5.21421	4.80542	2.26858e-05	0.000594317	2.29267	UP
XM_013973581.2	0.805613	3.88161	4.80435	2.27628e-05	0.000595738	2.34967	NOT
MSTRG.7985.1	1.56118	2.56663	4.80288	2.28682e-05	0.000597897	2.46736	UP
XM_018050505.1	-1.88338	2.25112	-4.80076	2.30206e-05	0.000601279	2.51054	DOWN
XM_018062843.1	-3.0069	1.08362	-4.79978	2.30922e-05	0.000602545	2.58639	DOWN
XM_013965759.2	-1.37487	1.63733	-4.79929	2.31274e-05	0.000602859	2.54828	DOWN
MSTRG.1461.1	3.77423	4.00933	4.79852	2.31838e-05	0.000603447	2.40994	UP
XM_005685609.3	-0.869192	2.12399	-4.79835	2.31962e-05	0.000603447	2.49755	NOT
XM_018055654.1	0.5391	3.84948	4.79667	2.33188e-05	0.000606033	2.31789	NOT
XR_001917710.1	0.788672	1.9915	4.79408	2.35098e-05	0.000610389	2.48663	NOT
XM_018046602.1	-0.689681	3.77548	-4.79332	2.35656e-05	0.00061123	2.32818	NOT
MSTRG.3119.1	-2.06777	0.608161	-4.79234	2.36388e-05	0.000612367	2.5923	DOWN
XM_005695059.3	-1.34744	1.91056	-4.7921	2.36564e-05	0.000612367	2.49854	DOWN
XM_018060178.1	1.86599	4.17902	4.79162	2.36922e-05	0.000612606	2.33556	UP
XM_005693713.3	0.915389	2.82984	4.79134	2.37126e-05	0.000612606	2.41094	NOT
XM_018039319.1	1.9657	0.504036	4.78821	2.39472e-05	0.000617519	2.55747	UP
MSTRG.17502.1	-1.39379	3.65445	-4.78817	2.39501e-05	0.000617519	2.34319	DOWN
XM_005675553.3	2.01548	2.42079	4.78749	2.40013e-05	0.000617695	2.39132	UP
MSTRG.10860.2	-1.31836	0.98882	-4.78745	2.40043e-05	0.000617695	2.55423	DOWN
XM_018061653.1	0.819531	3.67901	4.78705	2.4035e-05	0.000617877	2.3075	NOT
MSTRG.2405.1	2.19004	2.27499	4.78643	2.40816e-05	0.000618466	2.45174	UP
XM_013963727.2	-1.17788	1.92173	-4.78578	2.41309e-05	0.000619123	2.46806	DOWN
XM_005695727.2	-1.1278	1.41517	-4.78276	2.43614e-05	0.000624422	2.52607	DOWN
XM_018065627.1	1.23093	6.21075	4.78209	2.4412e-05	0.000625106	2.2025	UP
XR_001296673.2	2.3634	0.6291	4.78118	2.44824e-05	0.000626294	2.54186	UP
XM_005691063.3	-1.39046	3.79764	-4.78052	2.45331e-05	0.000626976	2.29818	DOWN
XM_005709481.3	-1.3786	1.97563	-4.78002	2.45716e-05	0.000627344	2.46666	DOWN
XM_005682607.3	0.895904	5.59661	4.77811	2.47192e-05	0.000630496	2.20008	NOT
MSTRG.13709.1	-1.86756	0.723152	-4.77754	2.47641e-05	0.000631025	2.54603	DOWN
NM_001314194.1	2.47115	3.73811	4.77546	2.4926e-05	0.000634532	2.34121	UP
MSTRG.10063.3	-1.97952	0.233798	-4.77118	2.52637e-05	0.000642502	2.53315	DOWN
XM_018057144.1	-1.26354	0.989322	-4.76985	2.53697e-05	0.000644567	2.50278	DOWN
MSTRG.4838.1	1.34051	1.75431	4.76798	2.55185e-05	0.000647719	2.41319	UP
XM_018052117.1	1.90905	0.930331	4.76759	2.555e-05	0.000647888	2.44821	UP
XM_018057282.1	1.73531	2.35157	4.76695	2.56014e-05	0.00064818	2.35809	UP
XM_018044997.1	-1.7218	-0.190082	-4.76683	2.56112e-05	0.00064818	2.52837	DOWN
MSTRG.5940.1	0.568844	3.05622	4.76539	2.57267e-05	0.000650473	2.28881	NOT
MSTRG.9608.11	-2.13778	0.552775	-4.76373	2.58614e-05	0.000653076	2.50692	DOWN
XM_018044393.1	1.38432	4.85632	4.76351	2.58797e-05	0.000653076	2.18306	UP
MSTRG.15646.1	2.26795	0.462459	4.76215	2.59904e-05	0.000655235	2.48411	UP
XM_018055125.1	-1.29643	1.36304	-4.76006	2.61609e-05	0.000658702	2.45091	DOWN
XM_005677354.3	0.906153	2.8462	4.75985	2.61784e-05	0.000658702	2.30495	NOT
MSTRG.6106.2	0.776864	1.73591	4.7594	2.62153e-05	0.000658993	2.3845	NOT
XM_005677116.3	3.49648	3.31263	4.75753	2.63697e-05	0.000662237	2.30137	UP
XM_018051875.1	-2.31057	7.46839	-4.75662	2.64452e-05	0.000663159	2.10787	DOWN
XM_013964591.2	-1.03162	2.54738	-4.75648	2.64572e-05	0.000663159	2.33558	DOWN
MSTRG.7440.6	3.10461	1.03841	4.75561	2.65289e-05	0.000664317	2.45422	UP
XM_013967413.2	-1.21655	1.88542	-4.75478	2.65983e-05	0.000665417	2.39973	DOWN
XM_018060461.1	1.80312	1.19764	4.75362	2.66953e-05	0.000667204	2.42724	UP
XM_018065326.1	-0.872473	2.41338	-4.75267	2.67751e-05	0.000668558	2.31752	NOT
XM_018051642.1	-2.04412	2.04696	-4.7499	2.70091e-05	0.000673756	2.35318	DOWN
MSTRG.1321.1	-1.07083	1.1377	-4.74659	2.72907e-05	0.000680131	2.42424	DOWN
XM_018062150.1	-1.28963	0.496021	-4.74538	2.73949e-05	0.000681642	2.45057	DOWN
MSTRG.2864.1	2.13625	-0.606027	4.74528	2.74036e-05	0.000681642	2.45204	UP
XM_018066402.1	-1.49822	3.224	-4.74289	2.76098e-05	0.000686117	2.25407	DOWN
XR_001917004.1	0.71648	4.79656	4.74258	2.76364e-05	0.000686124	2.1088	NOT
XM_005695057.3	0.599579	3.52769	4.74084	2.7788e-05	0.000689084	2.18608	NOT
MSTRG.4769.3	1.94712	2.54674	4.7406	2.78084e-05	0.000689084	2.25035	UP
XM_005680737.3	1.13608	3.4271	4.73857	2.79862e-05	0.000692832	2.17137	UP
XM_005682510.3	0.585266	4.50918	4.73705	2.81195e-05	0.000695471	2.10404	NOT
MSTRG.9176.1	-1.21833	1.43711	-4.7338	2.84081e-05	0.000701422	2.36933	DOWN
XM_018056562.1	1.48929	1.12595	4.73338	2.84453e-05	0.000701422	2.35553	UP
XM_018065506.1	-0.937335	2.62324	-4.7332	2.84619e-05	0.000701422	2.26264	NOT
MSTRG.10372.1	1.25897	3.62766	4.73313	2.84676e-05	0.000701422	2.14004	UP
XM_018066108.1	-1.57926	-0.16961	-4.73275	2.85018e-05	0.000701601	2.42568	DOWN
XM_018044310.1	-1.44	0.173652	-4.73159	2.86056e-05	0.000703494	2.41691	DOWN
MSTRG.1919.1	1.19698	10.5958	4.73022	2.87283e-05	0.000705845	2.00908	UP
XR_001919622.1	1.31445	2.29363	4.728	2.89296e-05	0.000710122	2.24404	UP
XM_018040413.1	0.610238	4.23248	4.7256	2.91478e-05	0.000714805	2.08589	NOT
XM_018046445.1	-1.04114	2.14227	-4.72364	2.93272e-05	0.00071853	2.27446	DOWN
XM_018047366.1	-1.3836	2.72243	-4.72324	2.93645e-05	0.000718769	2.20108	DOWN
XM_018047113.1	-1.07222	6.36776	-4.72085	2.9585e-05	0.000723488	2.01908	DOWN
XM_018039103.1	0.996047	3.12851	4.71925	2.97341e-05	0.000725816	2.13492	NOT
XM_005680901.3	-1.83948	0.147057	-4.71923	2.97358e-05	0.000725816	2.38048	DOWN
MSTRG.10654.1	0.906082	3.44563	4.71802	2.98485e-05	0.000727886	2.12749	NOT
XM_005695886.3	-0.666454	4.05698	-4.71622	3.00175e-05	0.000731323	2.07628	NOT
XM_013975890.2	4.43843	2.44519	4.71201	3.04162e-05	0.000740345	2.26583	UP
MSTRG.408.1	3.11602	0.32521	4.71104	3.05089e-05	0.000741909	2.32715	UP
MSTRG.3212.1	-1.59435	0.445066	-4.71046	3.05638e-05	0.000742552	2.35168	DOWN
XM_005700145.2	-1.61185	1.45413	-4.70949	3.06566e-05	0.000744115	2.29082	DOWN
XM_018059371.1	1.10474	2.81267	4.70919	3.06853e-05	0.000744118	2.15907	UP
XR_001919148.1	0.997772	2.55336	4.70537	3.10547e-05	0.000752376	2.19215	NOT
XM_018044445.1	-0.91096	4.78954	-4.70438	3.11514e-05	0.000753345	2.00859	NOT
XM_018049592.1	1.64265	1.55968	4.70414	3.11752e-05	0.000753345	2.23113	UP
XM_013965131.2	2.14474	-0.238848	4.70408	3.11813e-05	0.000753345	2.33091	UP
XM_018059873.1	-0.935523	1.73869	-4.70165	3.14189e-05	0.000758384	2.22411	NOT
XM_018046885.1	0.58407	4.00221	4.69969	3.16122e-05	0.000762344	2.01276	NOT
XM_005699329.3	-1.69427	3.62132	-4.69918	3.16634e-05	0.000762874	2.06289	DOWN
MSTRG.10972.1	3.33089	1.81522	4.69755	3.18246e-05	0.000765495	2.24312	UP
XM_018047555.1	-1.34395	1.4057	-4.69749	3.18309e-05	0.000765495	2.26011	DOWN
XM_018045728.1	1.48999	2.86368	4.69474	3.21061e-05	0.000771315	2.10092	UP
MSTRG.11529.1	-1.09544	0.837464	-4.69448	3.2132e-05	0.000771315	2.28799	DOWN
XM_013973892.2	-1.32546	1.81112	-4.69346	3.22351e-05	0.000772725	2.21842	DOWN
XM_005685406.3	-2.60735	0.725908	-4.69331	3.22499e-05	0.000772725	2.30416	DOWN
XM_018054662.1	-1.27694	1.91953	-4.69157	3.2426e-05	0.00077623	2.18823	DOWN
XM_018044198.1	0.636026	2.31065	4.68938	3.26491e-05	0.000780856	2.13916	NOT
MSTRG.12114.1	-1.78735	-0.0630846	-4.68745	3.28476e-05	0.000784884	2.29428	DOWN
MSTRG.7515.5	1.98052	1.02612	4.68589	3.30081e-05	0.000787997	2.20383	UP
XM_005697330.3	0.808555	4.7551	4.68355	3.32506e-05	0.00079306	1.9381	NOT
MSTRG.7765.1	5.82846	2.85818	4.6801	3.36111e-05	0.000800926	2.12995	UP
MSTRG.12365.1	0.668805	3.58983	4.67909	3.37171e-05	0.00080272	1.9764	NOT
XM_005677256.3	-2.35796	1.23319	-4.67875	3.37539e-05	0.000802864	2.22474	DOWN
XM_018044816.1	1.02836	2.29704	4.67503	3.41482e-05	0.000811502	2.09113	UP
XM_018060976.1	-1.9603	0.278147	-4.67124	3.45561e-05	0.000820448	2.23909	DOWN
XM_018066612.1	2.37193	1.2149	4.66983	3.47087e-05	0.000823323	2.15679	UP
MSTRG.12834.4	-1.84927	0.171289	-4.66913	3.47839e-05	0.000824357	2.24041	DOWN
XM_018041840.1	-0.480315	4.23398	-4.66544	3.51878e-05	0.000832276	1.90549	NOT
XM_018054924.1	1.18314	1.6883	4.66533	3.52002e-05	0.000832276	2.11123	UP
XM_018062173.1	0.702793	3.39265	4.66521	3.52138e-05	0.000832276	1.95492	NOT
XM_018050700.1	-1.54462	-0.319937	-4.66346	3.54063e-05	0.000835628	2.22946	DOWN
XM_013967938.1	1.04254	5.41858	4.66334	3.54197e-05	0.000835628	1.85499	UP
XM_018060092.1	-1.81374	1.26141	-4.66	3.57915e-05	0.000843004	2.16973	DOWN
XM_018040521.1	0.991286	3.0774	4.65995	3.57969e-05	0.000843004	1.97419	NOT
XM_018052479.1	1.58308	0.132569	4.65927	3.5873e-05	0.000844035	2.18883	UP
MSTRG.3614.11	2.26932	1.14081	4.65665	3.61681e-05	0.000850211	2.10811	UP
XM_018058029.1	-1.353	1.06713	-4.65507	3.63471e-05	0.000853649	2.16349	DOWN
XM_005695598.3	-0.896738	2.24047	-4.65475	3.63839e-05	0.000853746	2.06038	NOT
XM_005687598.3	1.57313	3.43542	4.65354	3.65211e-05	0.000856196	1.95005	UP
XM_005675028.3	-1.05957	2.68753	-4.65309	3.65727e-05	0.000856635	2.0057	DOWN
XM_005685363.3	-0.629746	4.06125	-4.65267	3.66213e-05	0.000857003	1.884	NOT
XM_018060963.1	1.12864	6.98751	4.65016	3.69096e-05	0.000862977	1.79529	UP
XM_018061144.1	2.12251	0.793417	4.6449	3.752e-05	0.000876464	2.12167	UP
XM_018062781.1	-1.8249	-0.0676749	-4.64457	3.75587e-05	0.000876583	2.1719	DOWN
NM_001285712.1	1.14256	6.69406	4.64286	3.77609e-05	0.000880514	1.77583	UP
XM_005700970.2	-1.45183	1.34253	-4.63917	3.81984e-05	0.000889026	2.0854	DOWN
XM_005674692.3	-0.531817	3.34221	-4.63912	3.82042e-05	0.000889026	1.89049	NOT
XM_018066902.1	0.819297	6.21142	4.63892	3.82281e-05	0.000889026	1.76952	NOT
MSTRG.3149.2	1.924	2.1043	4.63856	3.82713e-05	0.000889046	1.95106	UP
NM_001285775.1	2.88619	5.28889	4.63827	3.83058e-05	0.000889046	1.8212	UP
XM_018065592.1	-1.67706	-0.0765891	-4.6375	3.83975e-05	0.000889046	2.15049	DOWN
XM_005680968.3	-0.785512	8.01084	-4.6375	3.83981e-05	0.000889046	1.74534	NOT
XM_018045858.1	-0.530233	5.19342	-4.63749	3.83994e-05	0.000889046	1.78573	NOT
XM_018066337.1	-1.40583	1.45003	-4.63581	3.86009e-05	0.000892919	2.07624	DOWN
XM_018056870.1	1.23321	6.60417	4.63513	3.8683e-05	0.000894025	1.75226	UP
MSTRG.2230.3	1.84515	3.31499	4.63285	3.8959e-05	0.000899608	1.88427	UP
XM_018062016.1	-0.855849	4.57871	-4.62987	3.93237e-05	0.000907226	1.78887	NOT
XM_018060827.1	-1.08351	3.40428	-4.62786	3.95703e-05	0.000912109	1.85116	DOWN
MSTRG.2689.1	1.93952	3.08528	4.62482	3.9948e-05	0.000919824	1.8571	UP
XM_018050322.1	-0.553449	6.05661	-4.6246	3.99755e-05	0.000919824	1.72996	NOT
XM_005680902.3	-2.1264	0.566602	-4.6223	4.02636e-05	0.000925638	2.08842	DOWN
MSTRG.1684.3	-2.38153	2.35367	-4.62159	4.03529e-05	0.000926874	1.97169	DOWN
MSTRG.17689.1	2.3027	0.791594	4.61919	4.06559e-05	0.000933012	2.05211	UP
XM_005693237.3	-1.56596	1.92804	-4.61754	4.0865e-05	0.000936987	1.98706	DOWN
XM_018064898.1	-0.666648	4.41912	-4.61633	4.10199e-05	0.000939713	1.74315	NOT
XM_018049576.1	2.12349	4.4914	4.61494	4.11979e-05	0.000942918	1.76592	UP
NM_001285707.1	3.90159	2.86366	4.61468	4.12321e-05	0.000942918	1.91494	UP
XM_018061726.1	0.932715	2.92828	4.614	4.13188e-05	0.000944073	1.85412	NOT
XM_018043474.1	-1.61212	0.7927	-4.6126	4.15006e-05	0.000947397	2.06084	DOWN
XM_018043798.1	1.50114	2.77263	4.61173	4.16128e-05	0.000948746	1.87109	UP
XR_310286.3	0.68543	2.53594	4.61158	4.16324e-05	0.000948746	1.87846	NOT
NM_001285690.1	-0.556948	5.11009	-4.61101	4.17057e-05	0.000949588	1.70279	NOT
XM_018038509.1	-0.746367	2.31736	-4.60995	4.18448e-05	0.000951924	1.91818	NOT
XM_018052865.1	1.28357	1.31544	4.60945	4.19096e-05	0.000952568	1.98258	UP
XM_018044833.1	0.899456	4.38772	4.60659	4.2285e-05	0.00096025	1.72343	NOT
XM_018063936.1	1.44536	1.66313	4.60632	4.23212e-05	0.00096025	1.95385	UP
XM_005700083.3	-1.19686	6.73888	-4.60494	4.25034e-05	0.000963545	1.65875	DOWN
MSTRG.3392.1	-1.17849	1.26952	-4.60449	4.25631e-05	0.000964062	1.9975	DOWN
MSTRG.2308.7	-1.40988	2.84437	-4.60318	4.27367e-05	0.000967155	1.83388	DOWN
XM_018060295.1	-1.2128	2.55891	-4.59904	4.32918e-05	0.000978867	1.86224	DOWN
XM_018051597.1	-0.588326	3.16717	-4.59656	4.36278e-05	0.000985611	1.78516	NOT
XM_018042752.1	-0.841517	4.64596	-4.59398	4.39795e-05	0.000992695	1.67815	NOT
XM_018043930.1	-1.63116	-0.453961	-4.59312	4.40981e-05	0.000994513	2.02518	DOWN
NM_001285555.1	-1.9171	7.05718	-4.59268	4.41581e-05	0.000994698	1.62017	DOWN
XM_018057622.1	0.497174	4.94492	4.5925	4.41826e-05	0.000994698	1.65269	NOT
MSTRG.12809.2	1.63025	4.08134	4.59138	4.43379e-05	0.000996968	1.68546	UP
XM_018039725.1	-0.901566	3.45312	-4.59104	4.43849e-05	0.000996968	1.74834	NOT
XM_018064263.1	-0.93375	2.98079	-4.59093	4.43998e-05	0.000996968	1.78956	NOT
XR_001295535.2	1.32196	3.8092	4.59052	4.4457e-05	0.000996968	1.69408	UP
XM_018040239.1	1.59602	-0.0147529	4.59039	4.44744e-05	0.000996968	1.97816	UP
XM_005683751.3	1.92684	1.20416	4.58934	4.46203e-05	0.000999381	1.97685	UP
XM_018053355.1	-2.0027	0.664119	-4.58859	4.4725e-05	0.00100075	1.98748	DOWN
XM_005700408.3	1.89587	-0.0524901	4.58818	4.47815e-05	0.00100075	1.96833	UP
XM_018048176.1	0.615855	4.31083	4.58793	4.48163e-05	0.00100075	1.65752	NOT
XM_018043176.1	1.30575	0.944056	4.5878	4.48349e-05	0.00100075	1.94299	UP
XM_005695084.3	-0.850986	3.22095	-4.58647	4.50209e-05	0.00100404	1.73652	NOT
XR_001296365.2	3.24044	2.07559	4.58503	4.5223e-05	0.00100769	1.93804	UP
XM_005689581.3	2.36185	2.80629	4.58459	4.52853e-05	0.00100822	1.79229	UP
XM_005681789.3	-1.82825	3.57214	-4.58328	4.54707e-05	0.00101148	1.73719	DOWN
XM_018039248.1	-1.00133	4.39122	-4.58275	4.5545e-05	0.00101227	1.65695	DOWN
XM_005709702.3	-2.18275	3.86175	-4.58148	4.57262e-05	0.00101543	1.69428	DOWN
XM_018057848.1	-1.35133	0.955011	-4.58023	4.59039e-05	0.00101851	1.92801	DOWN
MSTRG.17923.2	1.6503	1.75355	4.5797	4.59805e-05	0.00101935	1.86571	UP
XM_005677500.3	-2.12406	5.63682	-4.57915	4.60588e-05	0.00102022	1.59795	DOWN
XM_018040848.1	1.3667	0.596217	4.57829	4.61825e-05	0.0010214	1.94243	UP
XM_018064769.1	1.66052	2.55357	4.57823	4.61904e-05	0.0010214	1.77836	UP
XM_018063635.1	1.15514	3.26795	4.57538	4.66025e-05	0.00102963	1.68673	UP
XM_018060956.1	-1.11487	3.08354	-4.5737	4.68471e-05	0.00103375	1.72841	DOWN
XM_018038933.1	1.8611	1.98719	4.57355	4.68682e-05	0.00103375	1.80855	UP
MSTRG.3147.4	-2.46906	0.649649	-4.57314	4.69292e-05	0.00103423	1.95295	DOWN
MSTRG.4465.8	-1.76738	1.14286	-4.57163	4.71498e-05	0.00103772	1.91836	DOWN
XM_005684948.3	0.666794	3.78647	4.57151	4.71675e-05	0.00103772	1.66109	NOT
MSTRG.669.1	-0.662275	2.4897	-4.56914	4.75172e-05	0.00104379	1.77833	NOT
MSTRG.608.1	-1.65127	-0.636658	-4.5691	4.75231e-05	0.00104379	1.95562	DOWN
XM_018042262.1	2.46455	1.6685	4.5665	4.7909e-05	0.00105082	1.84449	UP
XM_018058249.1	-1.28988	0.977137	-4.5664	4.79237e-05	0.00105082	1.90944	DOWN
XM_018066290.1	1.7594	0.703114	4.56558	4.80464e-05	0.00105262	1.89965	UP
XM_018053667.1	0.839011	3.49858	4.56447	4.82124e-05	0.00105486	1.65424	NOT
XM_013971329.2	-1.2185	1.15998	-4.56436	4.82292e-05	0.00105486	1.8864	DOWN
XM_018040875.1	-0.901031	4.04829	-4.56376	4.83188e-05	0.00105549	1.61453	NOT
XM_018041521.1	2.34778	0.511667	4.56362	4.83391e-05	0.00105549	1.89169	UP
XM_018058329.1	-1.41667	3.71412	-4.56299	4.84344e-05	0.00105669	1.62785	DOWN
MSTRG.16258.1	1.33283	4.81833	4.56231	4.8537e-05	0.00105787	1.56116	UP
XM_005684957.3	2.13452	-0.246908	4.56209	4.85696e-05	0.00105787	1.91166	UP
XM_005700205.3	1.03369	1.2012	4.56067	4.87846e-05	0.00106167	1.83579	UP
XM_018044008.1	-1.02395	1.62012	-4.55987	4.89075e-05	0.00106345	1.82835	DOWN
XM_018048548.1	-0.967851	6.11388	-4.55937	4.89834e-05	0.00106422	1.5348	NOT
MSTRG.15686.9	-2.09667	0.724319	-4.55845	4.9124e-05	0.00106638	1.90845	DOWN
MSTRG.9630.1	-1.85883	4.13575	-4.55706	4.93354e-05	0.00107008	1.60435	DOWN
MSTRG.3088.7	3.05842	1.61267	4.55676	4.93822e-05	0.00107021	1.80635	UP
XM_005683832.3	1.25601	3.61472	4.55542	4.95878e-05	0.00107377	1.63164	UP
MSTRG.3594.3	-1.98319	-0.131305	-4.5548	4.96848e-05	0.00107498	1.90563	DOWN
MSTRG.11599.4	3.82449	2.99329	4.55406	4.97989e-05	0.00107656	1.71937	UP
MSTRG.4560.1	1.95639	4.04134	4.55201	5.01167e-05	0.00108253	1.56134	UP
XM_005697654.3	1.77302	0.800113	4.55114	5.02533e-05	0.00108444	1.85458	UP
XM_018063538.1	-2.03213	1.2636	-4.55091	5.02883e-05	0.00108444	1.85251	DOWN
MSTRG.10487.1	1.65325	2.91752	4.54997	5.04359e-05	0.00108672	1.64795	UP
XM_018059550.1	-1.62357	4.25486	-4.54693	5.09142e-05	0.00109613	1.56307	DOWN
MSTRG.6899.1	-1.14748	2.83218	-4.54568	5.11129e-05	0.0010995	1.70477	DOWN
MSTRG.15732.2	-3.40326	1.89485	-4.54493	5.12325e-05	0.00110116	1.79152	DOWN
XM_005684210.3	-1.68136	0.995513	-4.54432	5.13301e-05	0.00110235	1.83301	DOWN
XM_005679832.3	1.58833	0.660756	4.53909	5.2171e-05	0.00111949	1.81906	UP
XM_013976387.2	-1.81391	-0.0175879	-4.53594	5.26833e-05	0.00112955	1.85488	DOWN
XM_018049752.1	-1.94317	1.46571	-4.53467	5.28919e-05	0.00113309	1.74381	DOWN
MSTRG.17175.3	1.28517	2.49	4.53243	5.32609e-05	0.00114006	1.65297	UP
MSTRG.67.1	1.43601	10.622	4.53147	5.34201e-05	0.00114253	1.4054	UP
XM_018051511.1	1.13129	1.43353	4.53116	5.34715e-05	0.0011427	1.73246	UP
MSTRG.12159.3	-1.2019	1.19381	-4.52973	5.37093e-05	0.00114684	1.79734	DOWN
MSTRG.8640.6	1.3872	1.4902	4.52749	5.40845e-05	0.00115391	1.71499	UP
XM_005692929.3	-1.52762	0.760379	-4.52705	5.41585e-05	0.00115454	1.81108	DOWN
XM_013962750.2	-0.895408	1.41581	-4.52677	5.42049e-05	0.00115459	1.73638	NOT
XM_018051809.1	1.51738	0.507194	4.52543	5.44318e-05	0.00115847	1.78992	UP
XM_018048520.1	2.20435	1.1801	4.52185	5.50401e-05	0.00117047	1.75461	UP
XM_018061713.1	1.74778	0.763705	4.52131	5.5132e-05	0.00117146	1.77045	UP
XM_018067086.1	-1.44581	1.63958	-4.52089	5.52039e-05	0.00117204	1.71987	DOWN
XM_018052476.1	1.36994	3.64671	4.51882	5.55601e-05	0.00117864	1.5045	UP
XM_005680638.3	-0.9372	3.25515	-4.51684	5.59031e-05	0.00118495	1.54721	NOT
MSTRG.14711.11	2.26273	0.00535018	4.5159	5.6066e-05	0.00118744	1.75701	UP
XM_005678753.3	-0.53274	4.20472	-4.51542	5.61494e-05	0.00118825	1.46055	NOT
XM_005674853.3	-2.46491	2.38777	-4.51246	5.6668e-05	0.00119825	1.61778	DOWN
XM_018047995.1	0.93989	2.36806	4.50971	5.71534e-05	0.00120676	1.58599	NOT
MSTRG.13906.1	1.34841	3.35231	4.50949	5.7192e-05	0.00120676	1.52416	UP
XM_018061739.1	0.800769	2.24138	4.50939	5.72093e-05	0.00120676	1.62564	NOT
XM_018056130.1	-0.966826	2.85618	-4.50625	5.7769e-05	0.00121758	1.54658	NOT
XM_018064467.1	-0.657631	4.66171	-4.50571	5.78662e-05	0.00121865	1.41369	NOT
XR_001919487.1	1.01335	1.26155	4.50459	5.80674e-05	0.00122154	1.6677	UP
XM_018066420.1	-1.84313	2.68761	-4.5042	5.81372e-05	0.00122154	1.57726	DOWN
XM_018066140.1	-1.42528	2.781	-4.50403	5.81689e-05	0.00122154	1.56816	DOWN
XM_018043424.1	-1.70411	0.947445	-4.50391	5.81908e-05	0.00122154	1.74341	DOWN
XM_018056203.1	0.99767	5.10702	4.50326	5.83068e-05	0.00122228	1.37998	NOT
XM_018045885.1	-0.608569	3.07717	-4.50319	5.83196e-05	0.00122228	1.52244	NOT
XM_018048278.1	1.39087	0.980939	4.50171	5.85884e-05	0.00122692	1.70565	UP
XM_005692702.3	-0.676941	3.40109	-4.50129	5.86647e-05	0.00122746	1.47755	NOT
MSTRG.17352.1	1.08333	2.41177	4.50105	5.87083e-05	0.00122746	1.58121	UP
XM_013974945.2	-1.42723	1.55406	-4.50018	5.88666e-05	0.00122979	1.63818	DOWN
XM_018052035.1	1.55987	0.972598	4.49979	5.89376e-05	0.0012302	1.66876	UP
MSTRG.504.5	1.47138	0.235127	4.49956	5.89806e-05	0.0012302	1.70944	UP
MSTRG.16356.1	1.2158	2.45685	4.49802	5.92628e-05	0.0012351	1.563	UP
XM_018051790.1	1.67457	1.10557	4.49745	5.93668e-05	0.00123557	1.6774	UP
XM_018052025.1	2.99921	2.98067	4.49738	5.938e-05	0.00123557	1.55786	UP
XM_018049267.1	2.76881	2.77649	4.49609	5.96177e-05	0.00123953	1.48274	UP
XM_018044501.1	0.587308	6.43743	4.49507	5.98074e-05	0.0012414	1.33432	NOT
XM_018056364.1	1.08531	5.55596	4.49489	5.98409e-05	0.0012414	1.34483	UP
XM_018061365.1	0.844953	6.92529	4.4947	5.98766e-05	0.0012414	1.32612	NOT
MSTRG.10627.5	1.68514	0.622029	4.49458	5.98982e-05	0.0012414	1.68607	UP
XM_018047160.1	-1.92814	2.01917	-4.49278	6.02328e-05	0.00124735	1.62703	DOWN
XM_018043135.1	1.87646	0.952799	4.49241	6.0303e-05	0.00124763	1.66122	UP
XM_018061071.1	-0.707302	2.70239	-4.4922	6.0342e-05	0.00124763	1.51838	NOT
XM_005689063.3	4.79061	4.07621	4.49134	6.05032e-05	0.00124997	1.43908	UP
XM_013972600.2	0.79423	2.18943	4.48953	6.08422e-05	0.0012554	1.56434	NOT
MSTRG.10480.1	2.01801	3.49439	4.48943	6.08622e-05	0.0012554	1.4254	UP
XM_018054975.1	-0.563275	4.47746	-4.48916	6.09119e-05	0.00125543	1.3709	NOT
XM_018057742.1	2.16973	1.88459	4.4878	6.11704e-05	0.00125921	1.56484	UP
XM_018057041.1	-0.942463	1.41819	-4.48768	6.11917e-05	0.00125921	1.6487	NOT
MSTRG.11599.5	2.34396	-0.0515385	4.48515	6.16742e-05	0.00126814	1.68747	UP
MSTRG.3032.1	-1.3387	5.43021	-4.48443	6.18112e-05	0.00126977	1.321	DOWN
XM_013962557.2	-1.04405	3.25169	-4.48423	6.18509e-05	0.00126977	1.4337	DOWN
NM_001314287.1	-1.79162	4.0669	-4.48384	6.19254e-05	0.0012703	1.39286	DOWN
MSTRG.12477.1	1.25608	2.7448	4.47979	6.27059e-05	0.0012853	1.45595	UP
MSTRG.7687.17	-1.52031	-0.358296	-4.47923	6.28155e-05	0.00128653	1.69185	DOWN
MSTRG.12226.11	1.55268	2.38786	4.4743	6.37817e-05	0.0013053	1.49421	UP
XM_018061849.1	1.20773	3.776	4.47379	6.38824e-05	0.00130634	1.40176	UP
XM_005679730.3	-1.66196	0.738793	-4.47195	6.42475e-05	0.00131277	1.64516	DOWN
XM_018045906.1	1.20613	1.15402	4.47105	6.44275e-05	0.00131542	1.59242	UP
XM_018063510.1	-1.22243	0.592669	-4.46929	6.47787e-05	0.00132156	1.64952	DOWN
MSTRG.5697.1	0.827627	2.2276	4.46885	6.48669e-05	0.00132232	1.49558	NOT
XM_018050185.1	-2.18777	3.44197	-4.46766	6.51058e-05	0.00132589	1.43581	DOWN
XM_018057743.1	2.16816	0.431038	4.46723	6.51929e-05	0.00132589	1.59706	UP
MSTRG.13899.1	1.053	1.29223	4.46722	6.51946e-05	0.00132589	1.58688	UP
XR_310768.3	-2.24879	3.19567	-4.46384	6.58807e-05	0.0013381	1.39671	DOWN
XM_005693137.3	-1.81527	0.668632	-4.46362	6.59263e-05	0.0013381	1.63444	DOWN
XM_018064747.1	-1.47196	6.01121	-4.46303	6.60458e-05	0.0013381	1.24269	DOWN
MSTRG.5685.1	2.83556	0.627008	4.46271	6.6112e-05	0.0013381	1.59277	UP
XM_018061757.1	0.908158	1.38061	4.4627	6.61133e-05	0.0013381	1.54944	NOT
XM_018056586.1	-1.07168	1.92214	-4.46256	6.6142e-05	0.0013381	1.50039	DOWN
XM_005699209.3	1.97937	-0.372106	4.46237	6.61809e-05	0.0013381	1.61839	UP
XM_005684569.3	1.74676	0.414061	4.46225	6.62049e-05	0.0013381	1.6037	UP
XM_005693519.2	-1.04792	7.46486	-4.46046	6.65727e-05	0.00134449	1.22074	DOWN
XM_005700087.3	0.842809	3.51692	4.46011	6.66459e-05	0.00134493	1.33194	NOT
XM_005685674.3	2.37214	1.80395	4.45835	6.70093e-05	0.00135122	1.47167	UP
XM_018045789.1	-1.00648	3.09404	-4.45794	6.70948e-05	0.00135189	1.39241	DOWN
XM_005709381.3	1.40658	6.84185	4.45731	6.72259e-05	0.00135329	1.21809	UP
XM_018039368.1	0.519601	3.25334	4.45711	6.72677e-05	0.00135329	1.34692	NOT
XM_018041671.1	0.663556	1.81869	4.45298	6.81314e-05	0.00136961	1.48123	NOT
XM_018066946.1	-1.91168	0.5122	-4.45203	6.83319e-05	0.00137258	1.60148	DOWN
MSTRG.3223.1	-1.5166	2.68257	-4.45062	6.86301e-05	0.00137751	1.42187	DOWN
XM_018053458.1	1.64568	3.42349	4.44794	6.92024e-05	0.00138793	1.2824	UP
XM_018050630.1	-1.4801	1.27152	-4.44557	6.97114e-05	0.00139707	1.52523	DOWN
XM_018045460.1	-1.47439	1.95073	-4.44466	6.99074e-05	0.00139992	1.44871	DOWN
XM_018050949.1	-1.01806	2.98133	-4.44387	7.00781e-05	0.00140226	1.33324	DOWN
XM_005684700.3	-1.44399	0.512451	-4.44319	7.02251e-05	0.00140292	1.56481	DOWN
XM_018048823.1	0.989925	5.8923	4.44307	7.02513e-05	0.00140292	1.18155	NOT
XR_001296113.2	4.62409	3.49666	4.44297	7.02724e-05	0.00140292	1.36775	UP
MSTRG.1195.1	2.79677	1.03409	4.4421	7.04616e-05	0.00140562	1.54192	UP
XM_005696265.3	1.41819	1.21916	4.4393	7.10755e-05	0.00141679	1.47085	UP
XM_005677623.3	3.70293	1.08155	4.43884	7.11762e-05	0.00141739	1.51051	UP
MSTRG.4292.3	1.56864	0.189459	4.43855	7.12397e-05	0.00141739	1.53472	UP
XM_018059514.1	-1.91358	0.0527907	-4.43842	7.1269e-05	0.00141739	1.5709	DOWN
XM_018053434.1	0.683411	4.49666	4.43719	7.15387e-05	0.00142168	1.20135	NOT
MSTRG.1252.4	2.83841	0.808555	4.43642	7.17106e-05	0.00142401	1.51772	UP
XM_018065355.1	0.654193	3.54891	4.43612	7.1776e-05	0.00142402	1.24374	NOT
XM_013973847.2	0.7927	5.68898	4.43592	7.18205e-05	0.00142402	1.17003	NOT
MSTRG.15693.12	1.46895	2.74101	4.43498	7.20297e-05	0.00142709	1.322	UP
XM_018042455.1	-1.84984	0.2888	-4.43227	7.2635e-05	0.00143799	1.54747	DOWN
XM_018044611.1	-1.98542	5.56263	-4.43181	7.27375e-05	0.00143892	1.17032	DOWN
MSTRG.12293.5	-0.708638	2.16299	-4.42917	7.3334e-05	0.00144962	1.38507	NOT
XM_005680647.3	-0.910917	1.67781	-4.42876	7.34278e-05	0.00145038	1.43163	NOT
XM_005674729.2	1.18061	6.10941	4.42728	7.37634e-05	0.00145591	1.13315	UP
XM_018051766.1	2.92987	6.41288	4.42412	7.44866e-05	0.00146684	1.12253	UP
XM_018055322.1	1.54241	1.30994	4.42397	7.4522e-05	0.00146684	1.46167	UP
XM_018040946.1	-0.939909	3.19358	-4.4239	7.45371e-05	0.00146684	1.26471	NOT
XM_013965703.2	2.03672	1.38631	4.42379	7.45635e-05	0.00146684	1.39342	UP
XM_018053071.1	3.86095	2.80389	4.42363	7.45984e-05	0.00146684	1.34835	UP
XM_018040775.1	-1.521	2.44044	-4.42236	7.48924e-05	0.00147151	1.36075	DOWN
XM_018040220.1	-0.609542	7.03989	-4.41805	7.58955e-05	0.0014901	1.09588	NOT
XM_005701572.3	-1.81894	-0.135133	-4.41645	7.62719e-05	0.00149559	1.50696	DOWN
XM_005686729.3	0.756459	5.96408	4.41621	7.63266e-05	0.00149559	1.10051	NOT
XM_018046503.1	-0.940405	2.89801	-4.41613	7.63469e-05	0.00149559	1.28977	NOT
XM_018038838.1	-1.87972	5.85183	-4.41446	7.67407e-05	0.00150217	1.10773	DOWN
XM_018044424.1	2.13661	0.49136	4.41383	7.68897e-05	0.00150287	1.45377	UP
XM_018046831.1	0.758367	3.36084	4.41382	7.68917e-05	0.00150287	1.19478	NOT
MSTRG.5940.5	1.03223	1.01892	4.41087	7.75963e-05	0.00151551	1.42645	UP
XM_005674903.3	-1.75315	1.4133	-4.41017	7.77636e-05	0.00151716	1.41489	DOWN
XM_005683002.3	1.46129	1.96067	4.41003	7.77972e-05	0.00151716	1.32766	UP
XM_018052545.1	-0.765239	3.88458	-4.40971	7.78734e-05	0.00151751	1.16174	NOT
MSTRG.10783.1	-1.10596	0.926302	-4.40774	7.83496e-05	0.00152461	1.44404	DOWN
XM_018053950.1	-1.72695	-0.172674	-4.40772	7.83545e-05	0.00152461	1.48756	DOWN
XM_005676740.2	2.01516	-0.0717765	4.40722	7.84751e-05	0.00152582	1.45361	UP
XM_018044558.1	-1.92411	0.432531	-4.40538	7.89199e-05	0.00153333	1.46168	DOWN
XM_018060066.1	2.23646	4.15515	4.40421	7.92058e-05	0.00153774	1.13191	UP
XM_018047641.1	-0.777089	3.73523	-4.4034	7.94045e-05	0.00153869	1.15147	NOT
XM_013963581.2	-0.961878	1.40341	-4.40301	7.94987e-05	0.00153869	1.38753	NOT
XM_005695546.3	2.19205	0.213104	4.40294	7.95159e-05	0.00153869	1.41644	UP
XM_018039406.1	2.29146	0.242143	4.40285	7.95379e-05	0.00153869	1.42607	UP
[truncated: 24,745 more rows]

## Sheet: ELvsIN
ID	logFC	AveExpr	t	P.Value	adj.P.Val	B	change
[truncated: 26,093 more rows]

[truncated: 11 more sheets: ELvsLG, PLvsLL, PLvsDP, PLvsIN, PLvsLG, LLvsDP, LLvsIN, LLvsLG, DPvsIN, DPvsLG, INvsLG]
