# Supplementary material for: Transcriptome Analysis of Goat Mammary Gland Tissue Reveals the Adaptive Strategies and Molecular Mechanisms of Lactation and Involution
Source: Int J Mol Sci. 2022 Nov 20;23(22):14424. doi: 10.3390/ijms232214424 (PMC9693614; doi:10.3390/ijms232214424)
Supplement: Supplementary file 1 [file ijms-23-14424-s001.zip › Table S8.xlsx]

## Sheet: cluster
ID	CLUSTER
LOC102168416	3
LOC102179160	3
LOC102179658	3
LOC102185492	6
LOC102191415	3
LOC108637843	5
LOC108638495	2
MIR1248	1
MIR2332	1
MIR25	1
MIR25_1	1
MIR7	1
MIR7_1	1
MIRLET7B_1	4
MSTRG.1.2	2
MSTRG.10003.1	1
MSTRG.10007.1	2
MSTRG.10008.4	5
MSTRG.10016.2	5
MSTRG.10016.7	2
MSTRG.10023.1	5
MSTRG.10023.2	1
MSTRG.10027.13	5
MSTRG.10029.3	5
MSTRG.10030.1	3
MSTRG.10035.1	3
MSTRG.10038.1	5
MSTRG.10038.19	2
MSTRG.10038.2	2
MSTRG.10038.4	5
MSTRG.10039.1	2
MSTRG.10040.7	4
MSTRG.10063.1	5
MSTRG.10063.3	3
MSTRG.10066.1	2
MSTRG.10074.1	5
MSTRG.10088.2	1
MSTRG.101.6	3
MSTRG.10100.5	1
MSTRG.10104.5	5
MSTRG.10105.4	2
MSTRG.10105.5	2
MSTRG.10107.1	2
MSTRG.10117.2	5
MSTRG.10126.1	6
MSTRG.10138.1	3
MSTRG.10158.2	1
MSTRG.10165.1	2
MSTRG.10171.1	3
MSTRG.10176.1	2
MSTRG.10179.1	2
MSTRG.10179.11	2
MSTRG.10179.17	3
MSTRG.10179.38	3
MSTRG.10179.39	2
MSTRG.10179.42	5
MSTRG.10179.43	3
MSTRG.10186.1	6
MSTRG.10186.2	2
MSTRG.10186.5	2
MSTRG.10187.1	2
MSTRG.10190.1	3
MSTRG.10201.5	5
MSTRG.10202.2	3
MSTRG.10203.4	5
MSTRG.10205.1	6
MSTRG.10207.2	2
MSTRG.10207.3	2
MSTRG.10208.2	6
MSTRG.10210.3	6
MSTRG.10210.4	4
MSTRG.10211.15	2
MSTRG.10211.17	5
MSTRG.10217.1	1
MSTRG.10235.2	3
MSTRG.10235.5	2
MSTRG.10235.9	5
MSTRG.10247.1	2
MSTRG.10249.2	3
MSTRG.1025.1	5
MSTRG.10252.2	4
MSTRG.10262.1	3
MSTRG.10267.3	6
MSTRG.10293.1	5
MSTRG.10297.1	1
MSTRG.10304.1	2
MSTRG.10314.1	1
MSTRG.10316.1	3
MSTRG.10316.6	3
MSTRG.10320.1	2
MSTRG.10325.1	2
MSTRG.10339.2	5
MSTRG.1034.2	1
MSTRG.10350.1	1
MSTRG.10352.1	5
MSTRG.10353.1	2
MSTRG.10356.3	1
MSTRG.10357.1	1
MSTRG.10372.1	2
MSTRG.10375.1	2
MSTRG.10378.1	5
MSTRG.10378.2	2
MSTRG.10378.5	1
MSTRG.10379.1	2
MSTRG.10382.2	5
MSTRG.10390.16	6
MSTRG.10391.4	4
MSTRG.10395.3	5
MSTRG.10419.2	1
MSTRG.10420.1	2
MSTRG.10420.2	2
MSTRG.10420.3	2
MSTRG.10421.1	1
MSTRG.10426.1	1
MSTRG.10426.14	1
MSTRG.10426.15	1
MSTRG.10426.17	1
MSTRG.10426.22	1
MSTRG.10426.25	1
MSTRG.10426.3	1
MSTRG.10426.4	1
MSTRG.10426.5	1
MSTRG.10426.7	1
MSTRG.10426.8	1
MSTRG.10440.2	1
MSTRG.10444.1	2
MSTRG.10445.3	2
MSTRG.10449.8	6
MSTRG.10449.9	2
MSTRG.10453.4	4
MSTRG.10470.2	4
MSTRG.10470.6	1
MSTRG.10480.1	2
MSTRG.10487.1	2
MSTRG.10487.2	5
MSTRG.10487.5	1
MSTRG.10491.1	1
MSTRG.10491.2	5
MSTRG.10498.3	1
MSTRG.10519.9	1
MSTRG.10523.4	2
MSTRG.10524.1	2
MSTRG.10527.1	2
MSTRG.10537.1	1
MSTRG.1055.1	1
MSTRG.1055.4	5
MSTRG.1056.1	5
MSTRG.10561.6	5
MSTRG.10563.2	5
MSTRG.10563.5	2
MSTRG.10563.7	2
MSTRG.10563.8	2
MSTRG.10564.1	5
MSTRG.10567.1	5
MSTRG.10567.2	1
MSTRG.10570.1	1
MSTRG.10570.3	1
MSTRG.10581.1	1
MSTRG.10585.3	5
MSTRG.10588.1	6
MSTRG.10591.1	6
MSTRG.10599.1	5
MSTRG.10607.1	1
MSTRG.10618.5	6
MSTRG.1062.2	1
MSTRG.1062.3	1
MSTRG.10627.5	2
MSTRG.10635.1	1
MSTRG.10637.2	2
MSTRG.10639.1	5
MSTRG.10645.3	1
MSTRG.10650.1	6
MSTRG.10654.1	2
MSTRG.10656.1	1
MSTRG.10667.4	3
MSTRG.10674.2	5
MSTRG.10674.3	2
MSTRG.10674.4	5
MSTRG.1069.1	1
MSTRG.1069.2	1
MSTRG.10690.1	1
MSTRG.10696.1	6
MSTRG.10698.1	5
MSTRG.10698.4	2
MSTRG.10698.5	2
MSTRG.10699.1	5
MSTRG.10711.1	1
MSTRG.10712.1	2
MSTRG.10715.3	2
MSTRG.10721.2	1
MSTRG.10723.2	5
MSTRG.10725.5	2
MSTRG.10725.7	4
MSTRG.10741.2	3
MSTRG.10741.3	4
MSTRG.10748.1	2
MSTRG.10764.1	5
MSTRG.10764.3	4
MSTRG.10767.7	5
MSTRG.10772.1	4
MSTRG.10776.4	1
MSTRG.10776.5	1
MSTRG.10780.1	1
MSTRG.10780.2	1
MSTRG.10783.1	3
MSTRG.10800.3	2
MSTRG.10803.9	1
MSTRG.10805.2	1
MSTRG.10806.1	5
MSTRG.10811.3	3
MSTRG.1082.1	1
MSTRG.1082.2	1
MSTRG.1082.6	5
MSTRG.1082.9	2
MSTRG.10828.1	3
MSTRG.10836.2	3
MSTRG.10837.3	3
MSTRG.10843.3	2
MSTRG.10849.8	6
MSTRG.1085.3	1
MSTRG.10859.1	4
MSTRG.10860.2	3
MSTRG.10865.4	1
MSTRG.1087.2	6
MSTRG.1087.3	2
MSTRG.1088.4	1
MSTRG.10881.1	2
MSTRG.1089.3	6
MSTRG.10891.1	2
MSTRG.10906.5	1
MSTRG.10912.5	3
MSTRG.10912.6	5
MSTRG.10919.1	2
MSTRG.10944.2	5
MSTRG.10948.3	2
MSTRG.10961.6	1
MSTRG.10967.1	6
MSTRG.10967.3	5
MSTRG.10972.1	5
MSTRG.10981.6	5
MSTRG.10985.6	3
MSTRG.10988.3	2
MSTRG.10991.1	6
MSTRG.10991.3	2
MSTRG.10997.2	4
MSTRG.11003.3	2
MSTRG.11009.3	3
MSTRG.11010.1	6
MSTRG.11010.3	6
MSTRG.11011.2	1
MSTRG.11016.2	4
MSTRG.11018.2	1
MSTRG.11035.1	1
MSTRG.11035.2	6
MSTRG.11039.1	1
MSTRG.11043.1	3
MSTRG.11050.1	2
MSTRG.11053.1	5
MSTRG.11057.2	1
MSTRG.1106.1	6
MSTRG.11066.1	1
MSTRG.11071.2	6
MSTRG.11075.3	2
MSTRG.11080.1	6
MSTRG.11081.1	3
MSTRG.11082.3	2
MSTRG.11085.1	1
MSTRG.11086.3	2
MSTRG.11087.3	1
MSTRG.11087.4	5
MSTRG.11090.4	1
MSTRG.11097.13	1
MSTRG.11097.14	1
MSTRG.11097.8	2
MSTRG.11103.1	1
MSTRG.11105.3	4
MSTRG.11106.2	6
MSTRG.1111.3	4
MSTRG.1111.4	4
MSTRG.11129.11	3
MSTRG.11129.6	6
MSTRG.11131.1	1
MSTRG.11131.2	1
MSTRG.11131.4	4
MSTRG.11131.5	1
MSTRG.11134.1	6
MSTRG.11134.9	3
MSTRG.11137.2	5
MSTRG.11142.2	5
MSTRG.11146.1	1
MSTRG.11161.1	3
MSTRG.1118.2	3
MSTRG.11185.1	5
MSTRG.11185.3	4
MSTRG.11185.4	6
MSTRG.11215.2	6
MSTRG.11215.3	5
MSTRG.11215.4	1
MSTRG.11215.5	1
MSTRG.11217.4	2
MSTRG.11217.5	2
MSTRG.11221.10	1
MSTRG.11221.6	3
MSTRG.11225.2	6
MSTRG.11231.2	3
MSTRG.11234.1	2
MSTRG.11252.1	5
MSTRG.11257.1	2
MSTRG.1126.1	5
MSTRG.11262.1	2
MSTRG.11262.3	1
MSTRG.11263.2	3
MSTRG.11264.2	3
MSTRG.1127.1	6
MSTRG.11283.1	4
MSTRG.11290.1	6
MSTRG.11295.4	1
MSTRG.11295.6	1
MSTRG.11295.8	2
MSTRG.113.4	3
MSTRG.1130.1	5
MSTRG.11307.3	6
MSTRG.11307.4	4
MSTRG.11310.1	3
MSTRG.11311.2	2
MSTRG.11314.2	6
MSTRG.11314.3	5
MSTRG.11324.2	2
MSTRG.11324.4	4
MSTRG.11324.6	3
MSTRG.11326.1	5
MSTRG.11332.1	3
MSTRG.11338.2	2
MSTRG.11347.3	1
MSTRG.1135.1	1
MSTRG.11353.1	5
MSTRG.11363.1	3
MSTRG.11393.4	6
MSTRG.11393.8	2
MSTRG.11398.1	3
MSTRG.11404.2	1
MSTRG.11417.4	3
MSTRG.11423.1	2
MSTRG.1146.1	1
MSTRG.1146.5	6
MSTRG.11467.4	6
MSTRG.1147.2	2
MSTRG.11480.3	3
MSTRG.11480.5	6
MSTRG.11480.6	3
MSTRG.11492.5	2
MSTRG.11499.1	4
MSTRG.11500.1	1
MSTRG.11504.6	2
MSTRG.11511.2	1
MSTRG.11515.9	3
MSTRG.11516.4	2
MSTRG.11516.7	1
MSTRG.11518.1	1
MSTRG.11519.1	1
MSTRG.11525.3	1
MSTRG.11526.4	1
MSTRG.11528.1	4
MSTRG.11529.1	1
MSTRG.1153.2	5
MSTRG.11536.1	4
MSTRG.11537.2	3
MSTRG.11545.1	4
MSTRG.11545.3	6
MSTRG.11546.1	1
MSTRG.11546.9	6
MSTRG.11547.1	2
MSTRG.11552.1	1
MSTRG.11557.2	1
MSTRG.11559.2	2
MSTRG.1156.1	5
MSTRG.11563.1	5
MSTRG.11568.1	5
MSTRG.11569.8	4
MSTRG.1157.1	2
MSTRG.11576.1	2
MSTRG.11579.3	5
MSTRG.11593.1	5
MSTRG.11593.5	1
MSTRG.11595.1	5
MSTRG.11595.2	1
MSTRG.11596.3	1
MSTRG.11596.7	1
MSTRG.11599.1	2
MSTRG.11599.2	2
MSTRG.11599.4	5
MSTRG.11599.5	5
MSTRG.11599.6	5
MSTRG.11607.2	2
MSTRG.11611.1	1
MSTRG.11612.1	1
MSTRG.11634.1	1
MSTRG.11649.11	1
MSTRG.11653.1	6
MSTRG.11653.2	2
MSTRG.11658.2	1
MSTRG.11662.1	1
MSTRG.11667.1	3
MSTRG.11672.2	3
MSTRG.11685.2	1
MSTRG.11694.1	6
MSTRG.11694.3	3
MSTRG.117.4	1
MSTRG.117.6	3
MSTRG.1170.1	5
MSTRG.1170.7	6
MSTRG.11700.2	2
MSTRG.11700.5	6
MSTRG.11700.6	1
MSTRG.11700.7	1
MSTRG.11700.9	1
MSTRG.11706.1	3
MSTRG.11706.2	3
MSTRG.11707.2	6
MSTRG.11714.2	6
MSTRG.11714.3	1
MSTRG.11715.1	5
MSTRG.11718.4	6
MSTRG.11719.6	4
MSTRG.11719.7	1
MSTRG.11741.1	1
MSTRG.11742.3	1
MSTRG.11743.2	1
MSTRG.11747.1	3
MSTRG.1177.1	1
MSTRG.11775.4	5
MSTRG.11798.1	6
MSTRG.11799.2	2
MSTRG.11808.3	4
MSTRG.11823.1	6
MSTRG.11843.1	4
MSTRG.11848.2	4
MSTRG.11852.1	1
MSTRG.11852.4	1
MSTRG.11860.9	2
MSTRG.11863.3	1
MSTRG.11868.1	5
MSTRG.11869.1	2
MSTRG.11870.2	2
MSTRG.11879.1	6
MSTRG.11881.2	6
MSTRG.11881.4	1
MSTRG.11881.6	6
MSTRG.11882.1	4
MSTRG.11885.3	6
MSTRG.11891.1	4
MSTRG.11894.1	1
MSTRG.11898.1	2
MSTRG.11898.4	3
MSTRG.11899.3	3
MSTRG.11902.1	6
MSTRG.11911.4	2
MSTRG.11912.3	2
MSTRG.11914.2	6
MSTRG.11915.4	1
MSTRG.11923.1	1
MSTRG.11925.12	1
MSTRG.11930.5	2
MSTRG.11930.6	2
MSTRG.11942.1	1
MSTRG.11948.1	3
MSTRG.1195.1	5
MSTRG.1195.2	2
MSTRG.11957.1	6
MSTRG.11959.3	2
MSTRG.11961.3	1
MSTRG.11961.5	1
MSTRG.11967.2	5
MSTRG.11973.1	1
MSTRG.11973.2	1
MSTRG.11975.1	4
MSTRG.11975.3	1
MSTRG.11978.4	2
MSTRG.11978.8	1
MSTRG.11979.1	5
MSTRG.11981.2	6
MSTRG.11984.11	2
MSTRG.11985.1	2
MSTRG.11989.1	2
MSTRG.11992.3	4
MSTRG.11996.1	1
MSTRG.12.2	5
MSTRG.12.3	5
MSTRG.12.4	2
MSTRG.12002.1	5
MSTRG.12002.3	6
MSTRG.12005.3	6
MSTRG.12007.1	2
MSTRG.12008.1	2
MSTRG.12012.4	5
MSTRG.12012.5	5
MSTRG.12027.14	5
MSTRG.12029.1	5
MSTRG.1203.2	1
MSTRG.1203.4	6
MSTRG.12030.1	2
MSTRG.12031.2	5
MSTRG.12033.4	1
MSTRG.12034.2	5
MSTRG.12044.1	5
MSTRG.12047.2	1
MSTRG.12047.3	1
MSTRG.1205.24	2
MSTRG.1205.31	2
MSTRG.12050.1	3
MSTRG.12051.2	6
MSTRG.12057.2	1
MSTRG.12064.1	2
MSTRG.12065.1	1
MSTRG.1207.2	1
MSTRG.12076.2	2
MSTRG.12076.3	6
MSTRG.12078.1	5
MSTRG.12089.1	5
MSTRG.12111.2	6
MSTRG.12111.4	1
MSTRG.12112.1	1
MSTRG.12112.2	1
MSTRG.12114.1	1
MSTRG.12121.3	3
MSTRG.12122.2	6
MSTRG.1213.1	5
MSTRG.12130.1	6
MSTRG.12143.1	2
MSTRG.12147.4	5
MSTRG.12149.7	4
MSTRG.12149.9	1
MSTRG.12158.1	4
MSTRG.12159.1	4
MSTRG.12159.3	1
MSTRG.12170.1	6
MSTRG.12171.1	1
MSTRG.12175.1	5
MSTRG.12176.1	3
MSTRG.12180.2	1
MSTRG.12180.3	1
MSTRG.12188.1	5
MSTRG.12196.2	1
MSTRG.12197.1	4
MSTRG.12198.1	1
MSTRG.12199.1	3
MSTRG.12206.2	5
MSTRG.12207.1	6
MSTRG.12207.5	6
MSTRG.12210.2	4
MSTRG.12213.5	1
MSTRG.12213.6	6
MSTRG.12213.7	1
MSTRG.12213.8	1
MSTRG.12217.1	1
MSTRG.12218.1	6
MSTRG.12219.1	5
MSTRG.12219.2	1
MSTRG.12220.1	5
MSTRG.12221.1	1
MSTRG.12221.2	1
MSTRG.12226.11	5
MSTRG.12226.12	2
MSTRG.12227.4	1
MSTRG.12228.3	4
MSTRG.12229.1	2
MSTRG.12229.4	2
MSTRG.12230.2	5
MSTRG.12231.2	1
MSTRG.12237.3	5
MSTRG.12243.2	6
MSTRG.12254.2	5
MSTRG.12255.1	1
MSTRG.12256.3	3
MSTRG.12259.1	2
MSTRG.1227.26	6
MSTRG.12275.1	6
MSTRG.12279.1	5
MSTRG.12280.1	3
MSTRG.12283.1	1
MSTRG.12283.2	1
MSTRG.12293.5	3
MSTRG.12293.6	1
MSTRG.12301.2	1
MSTRG.12303.1	6
MSTRG.12305.3	6
MSTRG.12319.2	5
MSTRG.12328.2	6
MSTRG.12328.5	3
MSTRG.12332.1	3
MSTRG.12333.4	1
MSTRG.12333.7	2
MSTRG.1234.10	4
MSTRG.1234.12	1
MSTRG.1234.19	1
MSTRG.12341.2	5
MSTRG.12341.7	1
MSTRG.12344.2	5
MSTRG.12347.4	5
MSTRG.12365.1	2
MSTRG.1237.6	3
MSTRG.12371.2	2
MSTRG.12379.2	3
MSTRG.12399.1	6
MSTRG.12401.2	6
MSTRG.12410.1	2
MSTRG.12417.5	4
MSTRG.1242.1	1
MSTRG.12424.5	5
MSTRG.12425.1	5
MSTRG.12425.2	1
MSTRG.12427.3	2
MSTRG.12442.4	1
MSTRG.12459.3	2
MSTRG.12465.2	4
MSTRG.12467.3	1
MSTRG.12469.2	5
MSTRG.12471.2	1
MSTRG.12477.1	5
MSTRG.12478.1	1
MSTRG.12478.3	6
MSTRG.12482.4	2
MSTRG.12490.6	2
MSTRG.12491.2	2
MSTRG.12493.4	3
MSTRG.12499.1	3
MSTRG.12519.1	3
MSTRG.1252.1	2
MSTRG.1252.2	5
MSTRG.1252.4	1
MSTRG.12522.5	5
MSTRG.12522.8	5
MSTRG.12526.3	1
MSTRG.12526.5	6
MSTRG.1253.1	5
MSTRG.12534.12	1
MSTRG.1254.1	2
MSTRG.12544.1	5
MSTRG.12555.2	5
MSTRG.1256.1	5
MSTRG.12568.1	6
MSTRG.12571.2	6
MSTRG.12574.2	6
MSTRG.12574.3	3
MSTRG.12576.1	3
MSTRG.12580.2	5
MSTRG.12581.1	5
MSTRG.12585.3	1
MSTRG.12590.1	6
MSTRG.12601.1	6
MSTRG.12609.1	5
MSTRG.12610.4	1
MSTRG.12616.1	5
MSTRG.12617.1	6
MSTRG.12617.7	5
MSTRG.12620.1	2
MSTRG.12622.2	5
MSTRG.12628.3	5
MSTRG.12639.2	6
MSTRG.12650.13	5
MSTRG.12650.4	5
MSTRG.12652.1	5
MSTRG.12655.1	5
MSTRG.12666.1	6
MSTRG.12669.4	4
MSTRG.12672.2	1
MSTRG.12683.1	1
MSTRG.12687.1	2
MSTRG.127.2	6
MSTRG.12703.1	2
MSTRG.12703.2	2
MSTRG.12715.1	4
MSTRG.1272.3	6
MSTRG.12722.2	2
MSTRG.12746.1	1
MSTRG.12747.1	4
MSTRG.12754.1	6
MSTRG.12759.1	1
MSTRG.12768.3	2
MSTRG.12770.1	2
MSTRG.12776.3	5
MSTRG.12785.2	1
MSTRG.12787.1	4
MSTRG.12795.1	1
MSTRG.128.1	4
MSTRG.12803.1	1
MSTRG.12807.1	1
MSTRG.12808.8	1
MSTRG.12808.9	1
MSTRG.12809.2	2
MSTRG.12810.1	2
MSTRG.12811.1	5
MSTRG.12811.2	5
MSTRG.12811.7	2
MSTRG.12813.1	2
MSTRG.12814.1	2
MSTRG.12819.1	5
MSTRG.12819.4	2
MSTRG.1282.2	6
MSTRG.1282.3	1
MSTRG.12821.3	6
MSTRG.12824.1	2
MSTRG.12824.3	2
MSTRG.12825.1	5
MSTRG.12826.2	5
MSTRG.12834.4	1
MSTRG.12834.8	6
MSTRG.12840.5	2
MSTRG.12858.1	5
MSTRG.12858.11	5
MSTRG.12858.5	5
MSTRG.12860.1	5
MSTRG.12863.11	6
MSTRG.12863.7	2
MSTRG.12863.9	1
MSTRG.12876.1	1
MSTRG.12876.2	1
MSTRG.12878.1	1
MSTRG.12880.1	1
MSTRG.1290.2	6
MSTRG.12902.1	6
MSTRG.12902.2	2
MSTRG.12903.2	3
MSTRG.12912.2	6
MSTRG.12914.2	3
MSTRG.12916.1	6
MSTRG.12927.1	3
MSTRG.12938.1	2
MSTRG.1294.2	1
MSTRG.12940.2	3
MSTRG.12942.5	5
MSTRG.12945.1	5
MSTRG.12950.11	2
MSTRG.12950.5	2
MSTRG.12962.1	3
MSTRG.12962.3	3
MSTRG.12963.2	2
MSTRG.12977.1	5
MSTRG.12980.1	2
MSTRG.12986.1	5
MSTRG.12988.3	5
MSTRG.12991.1	3
MSTRG.13010.3	5
MSTRG.1303.3	6
MSTRG.13031.3	5
MSTRG.13039.3	5
MSTRG.13039.8	2
MSTRG.13040.5	4
MSTRG.13040.7	4
MSTRG.13043.1	4
MSTRG.13047.1	4
MSTRG.13047.2	3
MSTRG.1305.1	1
MSTRG.13052.1	1
MSTRG.13060.1	1
MSTRG.13062.1	6
MSTRG.13063.4	6
MSTRG.13076.1	5
MSTRG.13077.1	5
MSTRG.13078.1	5
MSTRG.13079.1	5
MSTRG.13094.1	5
MSTRG.13095.1	1
MSTRG.13095.2	5
MSTRG.13097.1	2
MSTRG.13101.1	5
MSTRG.13101.3	2
MSTRG.13107.1	1
MSTRG.13119.10	1
MSTRG.13119.4	2
MSTRG.13119.5	5
MSTRG.13119.6	4
MSTRG.1314.1	3
MSTRG.1314.8	5
MSTRG.13143.3	4
MSTRG.13144.1	6
MSTRG.13144.2	2
MSTRG.13147.1	5
MSTRG.13147.4	2
MSTRG.13147.7	2
MSTRG.13147.8	2
MSTRG.13147.9	2
MSTRG.13150.1	1
MSTRG.1316.2	5
MSTRG.13178.1	1
MSTRG.13178.3	1
MSTRG.13180.4	2
MSTRG.13181.1	1
MSTRG.13189.8	1
MSTRG.13196.9	2
MSTRG.13199.4	5
MSTRG.13207.6	2
MSTRG.1321.1	3
MSTRG.13253.9	2
MSTRG.13257.1	5
MSTRG.13257.2	6
MSTRG.13258.1	2
MSTRG.13260.1	5
MSTRG.13274.20	1
MSTRG.1328.1	1
MSTRG.13283.1	5
MSTRG.13298.2	2
MSTRG.13299.1	4
MSTRG.13299.3	5
MSTRG.133.7	1
MSTRG.13309.1	6
MSTRG.13310.1	2
MSTRG.13310.14	2
MSTRG.13310.4	3
MSTRG.13317.1	2
MSTRG.13321.1	1
MSTRG.13326.12	3
MSTRG.13326.13	1
MSTRG.13330.3	6
MSTRG.13332.1	5
MSTRG.13335.2	4
MSTRG.13341.3	5
MSTRG.13346.1	2
MSTRG.13351.1	3
MSTRG.13354.3	5
MSTRG.13355.3	3
MSTRG.13356.26	1
MSTRG.13357.1	6
MSTRG.13360.11	2
MSTRG.13364.2	2
MSTRG.13364.3	2
MSTRG.13364.7	1
MSTRG.1338.1	5
MSTRG.13383.1	1
MSTRG.13394.4	1
MSTRG.13394.5	4
MSTRG.13398.1	1
MSTRG.13398.3	1
MSTRG.13403.10	1
MSTRG.13403.11	1
MSTRG.13403.7	1
MSTRG.13403.8	1
MSTRG.13406.1	2
MSTRG.13411.13	1
MSTRG.13411.4	6
MSTRG.13411.8	2
MSTRG.13411.9	2
MSTRG.13415.1	2
MSTRG.13415.3	2
MSTRG.13415.4	5
MSTRG.13415.5	2
MSTRG.13438.2	1
MSTRG.13446.2	5
MSTRG.13452.2	3
MSTRG.13460.12	2
MSTRG.13461.1	6
MSTRG.13483.2	3
MSTRG.13488.1	3
MSTRG.1350.1	1
MSTRG.13502.3	6
MSTRG.13503.10	2
MSTRG.13503.17	1
MSTRG.13505.1	3
MSTRG.13506.4	1
MSTRG.13514.1	5
MSTRG.13516.5	5
MSTRG.13519.2	5
MSTRG.13519.3	2
MSTRG.13530.2	6
MSTRG.13544.6	1
MSTRG.13549.4	3
MSTRG.13558.2	1
MSTRG.13563.11	3
MSTRG.13563.2	5
MSTRG.13563.4	3
MSTRG.13563.5	4
MSTRG.1357.4	1
MSTRG.13574.1	3
MSTRG.13577.3	5
MSTRG.13592.2	4
MSTRG.13593.8	1
MSTRG.13610.2	1
MSTRG.13615.2	4
MSTRG.13620.1	3
MSTRG.13624.3	2
MSTRG.13625.1	3
MSTRG.13625.3	3
MSTRG.1363.2	2
MSTRG.13639.1	6
MSTRG.13642.1	1
MSTRG.13646.3	6
MSTRG.13647.11	1
MSTRG.13649.1	1
MSTRG.13650.4	5
MSTRG.13665.1	2
MSTRG.13667.2	4
MSTRG.13680.3	2
MSTRG.13689.2	4
MSTRG.1369.1	1
MSTRG.13700.3	3
MSTRG.13704.2	4
MSTRG.13706.2	3
MSTRG.13709.1	3
MSTRG.13727.6	4
MSTRG.13732.2	2
MSTRG.13735.1	5
MSTRG.13742.1	3
MSTRG.13745.3	2
MSTRG.1375.1	5
MSTRG.13755.1	4
MSTRG.13759.3	1
MSTRG.13761.2	2
MSTRG.13762.2	3
MSTRG.13765.1	3
MSTRG.1377.1	6
MSTRG.13791.1	5
MSTRG.13791.3	6
MSTRG.13794.1	1
MSTRG.13806.4	5
MSTRG.13809.1	6
MSTRG.13811.2	1
MSTRG.13821.3	5
MSTRG.13823.2	2
MSTRG.13823.6	5
MSTRG.13827.1	1
MSTRG.13830.2	4
MSTRG.13837.2	1
MSTRG.13839.1	3
MSTRG.13851.2	2
MSTRG.13861.1	5
MSTRG.13866.7	5
MSTRG.13875.1	6
MSTRG.13878.6	3
MSTRG.13879.1	4
MSTRG.13879.3	6
MSTRG.13879.4	1
MSTRG.13879.5	2
MSTRG.1388.3	5
MSTRG.13880.10	3
MSTRG.13880.8	2
MSTRG.13881.2	5
MSTRG.13884.1	6
MSTRG.13889.15	2
MSTRG.13889.2	2
MSTRG.1389.1	1
MSTRG.13899.1	5
MSTRG.13900.2	5
MSTRG.13903.2	2
MSTRG.13903.3	2
MSTRG.13906.1	5
MSTRG.13916.1	1
MSTRG.13919.1	1
MSTRG.13919.4	2
MSTRG.1392.1	5
MSTRG.13922.1	4
MSTRG.1393.1	6
MSTRG.1393.2	1
MSTRG.13931.1	1
MSTRG.13932.1	1
MSTRG.13937.1	1
MSTRG.13941.4	5
MSTRG.13941.5	5
MSTRG.13941.6	5
MSTRG.13954.1	1
MSTRG.13957.1	1
MSTRG.140.1	6
MSTRG.1403.1	2
MSTRG.14034.1	1
MSTRG.14057.1	5
MSTRG.14059.2	5
MSTRG.14060.10	4
MSTRG.14060.4	6
MSTRG.14061.1	3
MSTRG.14063.2	1
MSTRG.1407.1	5
MSTRG.14074.12	1
MSTRG.14074.13	1
MSTRG.14074.15	1
MSTRG.14074.22	1
MSTRG.14074.23	2
MSTRG.14074.26	1
MSTRG.14074.27	1
MSTRG.14075.1	1
MSTRG.14076.2	2
MSTRG.14076.3	1
MSTRG.14076.7	4
MSTRG.14078.3	6
MSTRG.14082.1	5
MSTRG.14082.5	1
MSTRG.14087.1	3
MSTRG.1411.1	6
MSTRG.14112.3	6
MSTRG.14116.2	4
MSTRG.14119.10	5
MSTRG.14119.2	6
MSTRG.14123.8	2
MSTRG.14125.1	6
MSTRG.14129.1	3
MSTRG.14130.1	6
MSTRG.14138.6	6
MSTRG.14143.4	3
MSTRG.14148.4	3
MSTRG.14148.6	5
MSTRG.14150.1	2
MSTRG.14157.1	2
MSTRG.14157.2	2
MSTRG.14161.1	1
MSTRG.14163.1	4
MSTRG.14165.3	6
MSTRG.14165.6	1
MSTRG.14167.3	6
MSTRG.14167.4	6
MSTRG.14167.5	6
MSTRG.14168.1	1
MSTRG.14172.1	1
MSTRG.14181.1	1
MSTRG.14184.1	2
MSTRG.14191.1	5
MSTRG.14192.1	6
MSTRG.14194.3	6
MSTRG.14195.2	2
MSTRG.14195.3	5
MSTRG.14195.4	2
MSTRG.14197.2	3
MSTRG.142.1	2
MSTRG.14209.1	3
MSTRG.14212.1	2
MSTRG.14214.4	5
MSTRG.14218.3	6
MSTRG.14222.2	4
MSTRG.14237.4	1
MSTRG.14238.1	5
MSTRG.14239.3	5
MSTRG.14247.3	1
MSTRG.14247.4	4
MSTRG.14248.2	3
MSTRG.14256.1	2
MSTRG.14256.2	6
MSTRG.14257.10	1
MSTRG.14257.3	6
MSTRG.14272.1	5
MSTRG.14279.1	2
MSTRG.14280.1	1
MSTRG.14292.1	3
MSTRG.14293.1	6
MSTRG.14299.2	6
MSTRG.143.5	5
MSTRG.1430.1	3
MSTRG.14302.10	1
MSTRG.14302.12	2
MSTRG.14305.1	4
MSTRG.14306.1	1
MSTRG.14306.2	1
MSTRG.14309.1	2
MSTRG.1431.1	1
MSTRG.14326.1	5
MSTRG.14334.1	5
MSTRG.14335.2	2
MSTRG.14339.5	6
MSTRG.14340.5	5
MSTRG.14340.6	1
MSTRG.14340.8	1
MSTRG.14340.9	4
MSTRG.14342.2	1
MSTRG.14343.1	2
MSTRG.14343.2	1
MSTRG.14347.1	2
MSTRG.14350.2	3
MSTRG.14351.2	5
MSTRG.14352.6	3
MSTRG.14360.1	5
MSTRG.14362.33	3
MSTRG.14371.1	5
MSTRG.14373.4	1
MSTRG.14376.1	2
MSTRG.14376.2	6
MSTRG.14376.3	4
MSTRG.14376.4	2
MSTRG.14381.1	1
MSTRG.1439.1	3
MSTRG.1439.2	3
MSTRG.14392.1	2
MSTRG.14395.1	2
MSTRG.14408.1	4
MSTRG.14411.1	1
MSTRG.14411.2	4
MSTRG.14411.3	1
MSTRG.14411.4	1
MSTRG.14419.3	1
MSTRG.14423.3	6
MSTRG.14426.4	4
MSTRG.14428.2	5
MSTRG.14430.3	6
MSTRG.14439.2	1
MSTRG.14442.2	3
MSTRG.1447.1	5
MSTRG.1448.1	3
MSTRG.14485.1	5
MSTRG.14489.6	6
MSTRG.1449.3	1
MSTRG.14497.3	1
MSTRG.14497.5	1
MSTRG.14498.2	3
MSTRG.14499.4	6
MSTRG.1450.2	1
MSTRG.14510.1	1
MSTRG.14524.1	1
MSTRG.14527.1	5
MSTRG.14531.1	2
MSTRG.14531.2	4
MSTRG.14531.4	1
MSTRG.14531.6	5
MSTRG.14532.5	5
MSTRG.14532.7	1
MSTRG.14533.2	3
MSTRG.14533.3	3
MSTRG.14534.1	6
MSTRG.14543.1	5
MSTRG.14555.1	1
MSTRG.14555.7	1
MSTRG.14556.2	1
MSTRG.14558.1	1
MSTRG.14558.2	5
MSTRG.1456.1	6
MSTRG.14560.1	1
MSTRG.14560.3	1
MSTRG.14565.1	1
MSTRG.14568.1	4
MSTRG.14568.2	1
MSTRG.1458.1	1
MSTRG.14585.4	2
MSTRG.14588.1	3
MSTRG.14598.1	2
MSTRG.14599.4	5
MSTRG.14600.1	1
MSTRG.14601.1	2
MSTRG.1461.1	5
MSTRG.1461.3	5
MSTRG.1461.5	6
MSTRG.1462.1	5
MSTRG.14621.1	5
MSTRG.14621.4	6
MSTRG.14629.1	5
MSTRG.14629.3	4
MSTRG.14629.5	2
MSTRG.14635.1	1
MSTRG.14639.1	2
MSTRG.14642.1	5
MSTRG.14642.3	1
MSTRG.14644.5	5
MSTRG.14646.1	1
MSTRG.14647.1	5
MSTRG.14647.3	6
MSTRG.14649.1	5
MSTRG.14650.1	5
MSTRG.14652.1	1
MSTRG.14678.2	2
MSTRG.14681.2	1
MSTRG.14684.1	6
MSTRG.14685.2	6
MSTRG.14689.1	5
MSTRG.14691.2	2
MSTRG.14696.1	3
MSTRG.14697.1	5
MSTRG.14706.4	5
MSTRG.14706.5	2
MSTRG.14711.11	2
MSTRG.14711.14	4
MSTRG.14711.4	5
MSTRG.14711.6	5
MSTRG.14712.2	2
MSTRG.14713.8	1
MSTRG.14720.3	5
MSTRG.14721.17	2
MSTRG.14721.19	2
MSTRG.14721.20	2
MSTRG.14721.21	2
MSTRG.14721.22	2
MSTRG.14721.5	6
MSTRG.14722.2	2
MSTRG.1473.1	6
MSTRG.1473.4	4
MSTRG.14760.1	6
MSTRG.1477.1	3
MSTRG.14776.1	1
MSTRG.14790.1	2
MSTRG.14790.4	1
MSTRG.14791.2	5
MSTRG.14792.1	2
MSTRG.148.4	3
MSTRG.14811.2	5
MSTRG.14837.1	6
MSTRG.14844.1	1
MSTRG.1485.1	5
MSTRG.14857.1	2
MSTRG.14884.1	5
MSTRG.1489.3	1
MSTRG.1489.5	6
MSTRG.14890.4	1
MSTRG.1490.1	3
MSTRG.1490.4	2
MSTRG.14903.1	5
MSTRG.14907.1	3
MSTRG.14914.3	4
MSTRG.14914.4	1
MSTRG.14915.5	6
MSTRG.14924.1	3
MSTRG.14929.1	5
MSTRG.14929.2	6
MSTRG.14939.1	2
MSTRG.14939.9	1
MSTRG.14940.2	2
MSTRG.14942.1	4
MSTRG.14943.2	3
MSTRG.14945.2	2
MSTRG.14947.1	2
MSTRG.14947.2	2
MSTRG.1495.1	3
MSTRG.14953.1	6
MSTRG.14964.1	1
MSTRG.14979.1	2
MSTRG.1498.3	3
MSTRG.14981.3	4
MSTRG.14986.4	1
MSTRG.14986.7	1
MSTRG.1499.1	3
MSTRG.14996.1	6
MSTRG.14996.5	5
MSTRG.14997.1	6
MSTRG.14997.2	2
MSTRG.14999.2	1
MSTRG.15011.1	5
MSTRG.15013.5	2
MSTRG.1502.1	1
MSTRG.15031.3	3
MSTRG.15034.1	1
MSTRG.15044.4	3
MSTRG.15061.2	3
MSTRG.15067.2	6
MSTRG.15069.1	2
MSTRG.15069.7	5
MSTRG.15069.8	6
MSTRG.15070.12	2
MSTRG.15070.4	3
MSTRG.15070.9	2
MSTRG.1509.1	5
MSTRG.15095.1	3
MSTRG.15098.1	5
MSTRG.15099.1	5
MSTRG.15099.2	5
MSTRG.15102.1	4
MSTRG.15104.1	2
MSTRG.15109.1	4
MSTRG.15109.2	6
MSTRG.15112.1	6
MSTRG.15112.2	3
MSTRG.15113.2	3
MSTRG.15117.6	2
MSTRG.15125.1	3
MSTRG.15131.1	6
MSTRG.15140.1	1
MSTRG.15148.8	1
MSTRG.15151.1	2
MSTRG.15153.2	5
MSTRG.15157.6	4
MSTRG.15165.2	5
MSTRG.15171.2	4
MSTRG.15175.5	2
MSTRG.15186.3	3
MSTRG.15189.3	5
MSTRG.1519.1	5
MSTRG.15199.2	1
MSTRG.15199.6	1
MSTRG.15199.7	1
MSTRG.15199.8	1
MSTRG.15201.1	2
MSTRG.15208.1	3
MSTRG.1521.13	2
MSTRG.1522.7	1
MSTRG.15229.4	2
MSTRG.15234.1	2
MSTRG.15235.2	2
MSTRG.15242.6	3
MSTRG.15242.9	3
MSTRG.15243.1	3
MSTRG.15245.4	1
MSTRG.15269.3	6
MSTRG.1527.1	5
MSTRG.15271.1	5
MSTRG.15276.6	6
MSTRG.15276.7	1
MSTRG.15278.6	1
MSTRG.15278.8	5
MSTRG.15284.3	6
MSTRG.15284.8	2
MSTRG.1529.3	1
MSTRG.1529.5	1
MSTRG.15296.2	1
MSTRG.15297.4	1
MSTRG.15297.5	2
MSTRG.15297.6	1
MSTRG.15297.7	3
MSTRG.15299.8	1
MSTRG.15301.1	6
MSTRG.15308.3	6
MSTRG.15314.1	3
MSTRG.15320.3	5
MSTRG.15321.1	5
MSTRG.15322.1	2
MSTRG.15328.1	1
MSTRG.15328.3	1
MSTRG.15328.4	1
MSTRG.15328.6	1
MSTRG.15332.14	2
MSTRG.15340.1	1
MSTRG.15346.1	5
MSTRG.15350.1	5
MSTRG.15351.5	2
MSTRG.15360.1	3
MSTRG.15361.1	3
MSTRG.1538.3	4
MSTRG.15381.4	6
MSTRG.15381.7	1
MSTRG.15394.3	4
MSTRG.15400.1	2
MSTRG.15404.1	5
MSTRG.15407.1	6
MSTRG.15411.1	3
MSTRG.15416.1	6
MSTRG.15421.1	1
MSTRG.15423.1	1
MSTRG.1543.4	1
MSTRG.1543.5	4
MSTRG.15446.1	5
MSTRG.15457.1	6
MSTRG.15469.1	1
MSTRG.15477.2	6
MSTRG.15479.1	2
MSTRG.15479.2	2
MSTRG.15484.1	1
MSTRG.15493.1	3
MSTRG.15520.1	3
MSTRG.15525.2	5
MSTRG.15536.1	1
MSTRG.15542.1	1
MSTRG.1555.5	1
MSTRG.1555.6	6
MSTRG.15554.2	1
MSTRG.15556.2	1
MSTRG.15558.7	5
MSTRG.1556.2	1
MSTRG.1556.5	1
MSTRG.15560.2	6
MSTRG.15568.8	5
MSTRG.15577.1	2
MSTRG.15577.7	5
MSTRG.15579.3	1
MSTRG.15579.4	5
MSTRG.1559.3	6
MSTRG.15596.1	1
MSTRG.15597.1	1
MSTRG.15602.13	3
MSTRG.15602.15	3
MSTRG.15604.4	2
MSTRG.15611.3	6
MSTRG.15611.5	1
MSTRG.15611.6	1
MSTRG.15612.1	1
MSTRG.15612.4	5
MSTRG.15612.5	5
MSTRG.15612.8	1
MSTRG.15617.2	1
MSTRG.1562.2	2
MSTRG.15626.1	1
MSTRG.15633.7	5
MSTRG.15641.3	6
MSTRG.15644.1	2
MSTRG.15645.1	5
MSTRG.15646.1	5
MSTRG.15662.4	1
MSTRG.15673.1	6
MSTRG.15677.10	1
MSTRG.15685.1	5
MSTRG.15686.9	4
MSTRG.15687.1	1
MSTRG.15690.1	3
MSTRG.15692.1	3
MSTRG.15693.12	2
MSTRG.15693.14	1
MSTRG.157.1	1
MSTRG.15702.1	1
MSTRG.15711.1	1
MSTRG.15711.4	1
MSTRG.15721.2	5
MSTRG.15722.4	1
MSTRG.15724.1	1
MSTRG.1573.1	1
MSTRG.15732.1	3
MSTRG.15732.2	3
MSTRG.1574.6	2
MSTRG.1574.7	6
MSTRG.15743.2	3
MSTRG.15753.1	3
MSTRG.15754.7	6
MSTRG.15758.5	6
MSTRG.15759.1	5
MSTRG.15768.1	5
MSTRG.15778.3	3
MSTRG.15778.4	3
MSTRG.15783.1	6
MSTRG.15792.2	5
MSTRG.15802.1	6
MSTRG.15806.1	2
MSTRG.15808.5	1
MSTRG.15808.6	5
MSTRG.15810.1	2
MSTRG.15812.1	3
MSTRG.15818.3	6
MSTRG.15824.1	1
MSTRG.15830.1	1
MSTRG.15835.10	5
MSTRG.15835.12	2
MSTRG.15835.9	1
MSTRG.15839.1	1
MSTRG.15840.6	1
MSTRG.1585.2	5
MSTRG.15851.2	1
MSTRG.15874.1	3
MSTRG.15875.1	1
MSTRG.15880.1	4
MSTRG.15885.5	4
MSTRG.15890.1	2
MSTRG.15895.1	5
MSTRG.15896.2	5
MSTRG.15896.5	2
MSTRG.15898.6	6
MSTRG.15901.1	5
MSTRG.15907.4	5
MSTRG.15908.1	6
MSTRG.15913.6	2
MSTRG.15913.7	5
MSTRG.1592.1	5
MSTRG.15921.10	1
MSTRG.15921.3	1
MSTRG.15923.1	1
MSTRG.15927.2	5
MSTRG.15938.3	3
MSTRG.15946.10	1
MSTRG.15953.1	6
MSTRG.15957.2	2
MSTRG.15961.1	2
MSTRG.15976.1	4
MSTRG.15984.2	5
MSTRG.15985.1	5
MSTRG.15986.4	5
MSTRG.15989.4	1
MSTRG.15989.5	1
MSTRG.15991.12	1
MSTRG.15991.13	5
MSTRG.15993.2	5
MSTRG.15993.4	5
MSTRG.15996.2	1
MSTRG.16009.3	5
MSTRG.16010.1	5
MSTRG.16013.1	5
MSTRG.16014.1	5
MSTRG.16015.17	5
MSTRG.16015.18	1
MSTRG.16016.6	5
MSTRG.16025.3	5
MSTRG.16029.1	5
MSTRG.16034.1	3
MSTRG.16036.1	5
MSTRG.1604.1	5
MSTRG.16056.2	1
MSTRG.16058.2	3
MSTRG.16062.1	1
MSTRG.16073.4	2
MSTRG.16086.1	2
MSTRG.16092.1	1
MSTRG.16099.1	3
MSTRG.16103.1	1
MSTRG.16103.3	1
MSTRG.16115.2	3
MSTRG.16118.3	6
MSTRG.16121.4	6
MSTRG.16124.1	2
MSTRG.16125.2	1
MSTRG.16125.3	1
MSTRG.16130.1	1
MSTRG.16147.1	3
MSTRG.16167.3	2
MSTRG.16168.3	2
MSTRG.16171.109	5
MSTRG.16171.110	5
MSTRG.16171.20	5
MSTRG.16171.3	3
MSTRG.16171.4	5
MSTRG.16171.72	6
MSTRG.16171.73	2
MSTRG.16171.77	5
MSTRG.16171.81	3
MSTRG.16171.84	5
MSTRG.16171.9	5
MSTRG.16176.3	2
MSTRG.16176.5	5
MSTRG.16176.6	1
MSTRG.16176.7	2
MSTRG.16178.7	5
MSTRG.16181.1	2
MSTRG.16181.7	2
MSTRG.16186.1	1
MSTRG.16187.1	2
MSTRG.16191.1	5
MSTRG.16192.2	1
MSTRG.16192.5	1
MSTRG.16193.2	6
MSTRG.16201.1	2
MSTRG.16202.2	6
MSTRG.1621.3	5
MSTRG.1621.4	4
MSTRG.16214.1	3
MSTRG.16231.1	5
MSTRG.16234.1	4
MSTRG.16237.1	5
MSTRG.16243.1	3
MSTRG.16258.1	2
MSTRG.16271.1	5
MSTRG.16272.3	1
MSTRG.16278.1	2
MSTRG.16288.1	6
MSTRG.16289.5	4
MSTRG.16296.1	5
MSTRG.16299.4	4
MSTRG.16305.1	1
MSTRG.16318.1	2
MSTRG.16321.14	2
MSTRG.16322.1	6
MSTRG.16324.19	2
MSTRG.16334.3	5
MSTRG.1634.3	2
MSTRG.16341.1	5
MSTRG.16346.5	6
MSTRG.16352.1	3
MSTRG.16356.1	5
MSTRG.16360.12	2
MSTRG.16360.3	5
MSTRG.16372.1	5
MSTRG.16382.1	1
MSTRG.16386.1	2
MSTRG.16386.2	2
MSTRG.16387.3	3
MSTRG.16389.2	5
MSTRG.16391.1	2
MSTRG.16391.4	2
MSTRG.16391.5	2
MSTRG.16392.1	5
MSTRG.16394.2	5
MSTRG.16398.10	1
MSTRG.16404.5	3
MSTRG.16407.1	3
MSTRG.16407.4	1
MSTRG.16410.7	1
MSTRG.16410.9	1
MSTRG.16411.2	2
MSTRG.16413.1	5
MSTRG.16414.4	6
MSTRG.16417.1	6
MSTRG.16418.1	3
MSTRG.16419.2	5
MSTRG.16422.3	2
MSTRG.16422.6	6
MSTRG.16427.5	3
MSTRG.16429.1	6
MSTRG.16431.1	3
MSTRG.16431.18	6
MSTRG.16431.3	3
MSTRG.16432.1	3
MSTRG.16438.3	4
MSTRG.16444.5	2
MSTRG.16450.1	3
MSTRG.16450.3	1
MSTRG.16464.1	5
MSTRG.16464.5	6
MSTRG.16464.7	2
MSTRG.16464.9	2
MSTRG.16467.2	1
MSTRG.16476.1	5
MSTRG.16477.1	5
MSTRG.16482.1	2
MSTRG.16493.5	6
MSTRG.16502.1	5
MSTRG.16502.2	1
MSTRG.16503.4	5
MSTRG.16505.2	2
MSTRG.16509.2	2
MSTRG.1651.2	2
MSTRG.16528.11	4
MSTRG.16528.12	1
MSTRG.16529.1	2
MSTRG.16546.6	1
MSTRG.16551.2	1
MSTRG.16551.3	2
MSTRG.16560.1	2
MSTRG.16560.15	6
MSTRG.16560.4	6
MSTRG.1657.3	1
MSTRG.16584.1	2
MSTRG.16598.1	3
MSTRG.1660.1	3
MSTRG.16614.1	5
MSTRG.16625.2	6
MSTRG.16625.3	5
MSTRG.16633.1	1
MSTRG.16634.1	1
MSTRG.16639.9	1
MSTRG.16647.11	1
MSTRG.16666.7	2
MSTRG.16668.3	5
MSTRG.16671.2	3
MSTRG.16674.5	1
MSTRG.16674.6	1
MSTRG.16684.1	6
MSTRG.16686.1	1
MSTRG.16694.1	5
MSTRG.16694.2	2
MSTRG.16694.3	2
MSTRG.16695.1	2
MSTRG.16698.2	3
MSTRG.16700.1	6
MSTRG.16702.3	6
MSTRG.16704.1	4
MSTRG.16706.2	3
MSTRG.16711.1	3
MSTRG.16714.1	5
MSTRG.1672.5	1
MSTRG.16729.11	2
MSTRG.16730.1	1
MSTRG.16733.1	3
MSTRG.16736.6	5
MSTRG.16737.4	6
MSTRG.16741.1	6
MSTRG.16752.2	2
MSTRG.16752.3	2
MSTRG.16752.4	1
MSTRG.16763.1	1
MSTRG.16763.11	1
MSTRG.16763.15	2
MSTRG.16763.16	2
MSTRG.16763.23	2
MSTRG.16763.24	2
MSTRG.16763.26	2
MSTRG.16763.29	6
MSTRG.16763.32	2
MSTRG.16763.35	2
MSTRG.16766.2	1
MSTRG.16769.1	6
MSTRG.16769.2	3
MSTRG.16780.2	6
MSTRG.16785.4	4
MSTRG.1679.1	1
MSTRG.168.1	2
MSTRG.168.3	1
MSTRG.16803.2	1
MSTRG.16804.1	2
MSTRG.16805.1	2
MSTRG.1681.2	1
MSTRG.16814.2	6
MSTRG.16819.1	6
MSTRG.1682.1	6
MSTRG.16820.1	3
MSTRG.16821.1	6
MSTRG.16833.1	1
MSTRG.16834.3	2
MSTRG.1684.3	6
MSTRG.16841.3	3
MSTRG.16842.7	1
MSTRG.16859.4	6
MSTRG.1687.1	5
MSTRG.16873.1	3
MSTRG.16884.1	2
MSTRG.16885.1	2
MSTRG.16885.2	5
MSTRG.16889.1	5
MSTRG.16891.3	2
MSTRG.16902.2	5
MSTRG.1691.1	3
MSTRG.16921.2	2
MSTRG.16927.6	1
MSTRG.16927.7	1
MSTRG.16935.5	1
MSTRG.16938.1	2
MSTRG.16940.2	2
MSTRG.16946.2	6
MSTRG.16948.1	1
MSTRG.16951.1	6
MSTRG.16951.3	2
MSTRG.16959.1	1
MSTRG.1696.2	3
MSTRG.16960.1	2
MSTRG.16962.1	2
MSTRG.16962.5	6
MSTRG.16966.1	6
MSTRG.16973.3	1
MSTRG.16974.1	2
MSTRG.16979.1	3
MSTRG.16981.1	6
MSTRG.16982.1	3
MSTRG.16986.1	5
MSTRG.16987.1	3
MSTRG.16991.3	1
MSTRG.16994.1	5
MSTRG.16995.1	6
MSTRG.16997.1	1
MSTRG.16997.2	2
MSTRG.16997.4	1
MSTRG.16997.5	2
MSTRG.1700.3	6
MSTRG.17004.1	6
MSTRG.17007.1	1
MSTRG.17011.1	2
MSTRG.17013.1	2
MSTRG.17021.1	1
MSTRG.1703.2	2
MSTRG.17030.5	5
MSTRG.17032.3	2
MSTRG.17033.2	6
MSTRG.17044.6	6
MSTRG.17050.2	3
MSTRG.17055.1	5
MSTRG.17059.1	3
MSTRG.17060.2	1
MSTRG.17062.10	1
MSTRG.17062.11	1
MSTRG.17062.9	1
MSTRG.17065.2	2
MSTRG.17067.1	5
MSTRG.17073.1	6
MSTRG.17084.1	2
MSTRG.17087.1	5
MSTRG.17092.2	2
MSTRG.17093.4	5
MSTRG.1710.2	2
MSTRG.1710.3	2
MSTRG.17100.1	6
MSTRG.17103.1	5
MSTRG.17103.3	5
MSTRG.17108.1	1
MSTRG.17110.2	3
MSTRG.17111.1	2
MSTRG.17115.1	1
MSTRG.17115.3	1
MSTRG.17115.4	1
MSTRG.17116.1	5
MSTRG.17125.2	2
MSTRG.17127.1	2
MSTRG.17135.2	2
MSTRG.17135.3	5
MSTRG.17137.13	1
MSTRG.17137.7	5
MSTRG.17137.8	6
MSTRG.17137.9	5
MSTRG.1714.1	1
MSTRG.17143.1	1
MSTRG.17146.1	2
MSTRG.17146.2	5
MSTRG.17149.1	2
MSTRG.17151.1	1
MSTRG.17152.1	1
MSTRG.17153.2	1
MSTRG.17154.1	5
MSTRG.17157.1	1
MSTRG.17159.1	1
MSTRG.17162.1	1
MSTRG.17163.1	5
MSTRG.17163.15	2
MSTRG.17163.9	2
MSTRG.17165.1	1
MSTRG.17167.2	1
MSTRG.17168.2	1
MSTRG.17175.3	5
MSTRG.17175.5	5
MSTRG.17178.1	4
MSTRG.17180.2	4
MSTRG.17180.5	6
MSTRG.17180.7	2
MSTRG.17186.1	4
MSTRG.17187.3	2
MSTRG.17190.1	1
MSTRG.17191.1	1
MSTRG.17192.1	1
MSTRG.17193.1	5
MSTRG.17193.2	6
MSTRG.17194.1	1
MSTRG.17195.1	1
MSTRG.17196.1	1
MSTRG.17196.2	5
MSTRG.17197.1	2
MSTRG.17197.3	2
MSTRG.17198.1	2
MSTRG.17198.11	2
MSTRG.17198.3	2
MSTRG.17198.5	1
MSTRG.17198.6	2
MSTRG.17200.1	2
MSTRG.17200.13	5
MSTRG.17200.15	1
MSTRG.17200.23	2
MSTRG.17200.25	1
MSTRG.17200.27	1
MSTRG.17200.30	2
MSTRG.17200.5	4
MSTRG.17200.6	2
MSTRG.17200.8	2
MSTRG.17202.1	1
MSTRG.17204.1	1
MSTRG.17205.1	1
MSTRG.17206.1	1
MSTRG.17207.1	1
MSTRG.17208.1	1
MSTRG.17209.1	1
MSTRG.17209.2	1
MSTRG.17210.2	1
MSTRG.17213.1	1
MSTRG.17214.1	1
MSTRG.17216.3	5
MSTRG.17216.9	2
MSTRG.17220.1	1
MSTRG.17221.1	1
MSTRG.17222.1	1
MSTRG.17223.1	5
MSTRG.17223.6	1
MSTRG.17224.1	5
MSTRG.17225.2	5
MSTRG.17226.1	1
MSTRG.17227.1	1
MSTRG.17228.1	1
MSTRG.17229.1	1
MSTRG.17231.1	3
MSTRG.17239.1	1
MSTRG.1724.2	3
MSTRG.17240.1	1
MSTRG.17242.1	1
MSTRG.17242.2	1
MSTRG.17243.2	1
MSTRG.17244.1	1
MSTRG.17245.1	5
MSTRG.17246.1	5
MSTRG.17248.1	1
MSTRG.17249.1	1
MSTRG.17264.1	2
MSTRG.17278.1	3
MSTRG.17281.5	5
MSTRG.17289.1	3
MSTRG.17290.2	5
MSTRG.17300.12	5
MSTRG.17301.1	2
MSTRG.17301.2	2
MSTRG.17301.4	1
MSTRG.17301.5	1
MSTRG.17309.1	4
MSTRG.1731.1	5
MSTRG.17313.1	1
MSTRG.17314.1	1
MSTRG.17316.10	1
MSTRG.17316.20	1
MSTRG.17316.24	1
MSTRG.17316.25	2
MSTRG.17316.29	1
MSTRG.17316.8	2
MSTRG.17316.9	1
MSTRG.17317.1	1
MSTRG.17318.1	1
MSTRG.17319.1	1
MSTRG.17322.1	5
MSTRG.17323.1	1
MSTRG.17323.2	1
MSTRG.17324.1	6
MSTRG.17325.1	1
MSTRG.17327.1	1
MSTRG.17328.1	1
MSTRG.17329.1	2
MSTRG.1733.3	6
MSTRG.1733.5	5
MSTRG.17332.1	1
MSTRG.17333.2	1
MSTRG.17334.1	1
MSTRG.17335.1	1
MSTRG.17338.1	1
MSTRG.17339.1	1
MSTRG.1734.1	3
MSTRG.17341.1	1
MSTRG.17342.1	1
MSTRG.17343.1	1
MSTRG.17343.2	5
MSTRG.17345.1	1
MSTRG.17347.1	1
MSTRG.17348.1	1
MSTRG.17348.2	6
MSTRG.17349.2	1
MSTRG.17351.1	2
MSTRG.17352.1	5
MSTRG.17354.1	1
MSTRG.17355.1	1
MSTRG.17356.1	1
MSTRG.17357.1	1
MSTRG.17358.1	1
MSTRG.17359.1	1
MSTRG.17360.1	1
MSTRG.17360.2	1
MSTRG.17361.1	6
MSTRG.17362.1	2
MSTRG.17363.1	1
MSTRG.17364.1	1
MSTRG.17365.1	1
MSTRG.17366.1	1
MSTRG.17367.1	2
MSTRG.17367.2	1
MSTRG.17368.1	3
MSTRG.17370.1	1
MSTRG.17370.2	1
MSTRG.17371.4	1
MSTRG.17373.1	1
MSTRG.17375.4	1
MSTRG.17377.1	1
MSTRG.17377.2	1
MSTRG.17379.1	1
MSTRG.17380.1	2
MSTRG.17381.1	1
MSTRG.17382.1	1
MSTRG.17382.2	1
MSTRG.17383.1	1
MSTRG.17385.1	6
MSTRG.17386.1	1
MSTRG.17387.1	1
MSTRG.17388.1	1
MSTRG.17394.1	1
MSTRG.17396.2	6
MSTRG.17398.1	1
MSTRG.17399.1	1
MSTRG.17400.7	3
MSTRG.17403.1	1
MSTRG.17404.1	5
MSTRG.17405.1	4
MSTRG.17406.1	1
MSTRG.17407.1	1
MSTRG.17409.1	1
MSTRG.17411.1	6
MSTRG.17412.1	1
MSTRG.17415.1	1
MSTRG.17416.1	1
MSTRG.17417.1	1
MSTRG.17421.1	1
MSTRG.17422.1	2
MSTRG.17423.1	1
MSTRG.17428.1	2
MSTRG.17433.1	1
MSTRG.17434.1	1
MSTRG.17436.1	6
MSTRG.17438.1	1
MSTRG.17439.1	1
MSTRG.17440.1	1
MSTRG.17441.1	1
MSTRG.17444.1	6
MSTRG.17445.1	1
MSTRG.17448.1	1
MSTRG.17449.1	1
MSTRG.17450.1	1
MSTRG.17451.1	1
MSTRG.17454.1	1
MSTRG.17454.2	1
MSTRG.17455.1	1
MSTRG.17457.1	1
MSTRG.17458.1	1
MSTRG.17461.1	1
MSTRG.17462.1	1
MSTRG.17463.1	1
MSTRG.17467.2	1
MSTRG.17468.1	1
MSTRG.17469.1	1
MSTRG.17469.2	1
MSTRG.17470.1	1
MSTRG.17471.1	2
MSTRG.17471.3	5
MSTRG.17474.1	1
MSTRG.17478.2	1
MSTRG.17480.1	3
MSTRG.17481.1	5
MSTRG.17485.1	1
MSTRG.17486.1	2
MSTRG.17487.1	1
MSTRG.17488.1	1
MSTRG.17489.1	1
MSTRG.17490.2	1
MSTRG.17493.1	1
MSTRG.17496.1	1
MSTRG.17498.1	1
MSTRG.17499.1	3
MSTRG.17502.1	3
MSTRG.17505.1	5
MSTRG.17506.1	1
MSTRG.17507.1	5
MSTRG.17507.2	3
MSTRG.17510.1	1
[truncated: 11,084 more rows]

## Sheet: GO_C1
ONTOLOGY	ID	Description	GeneRatio	BgRatio	pvalue	p.adjust	qvalue	geneID	Count
BP	GO:0022613	ribonucleoprotein complex biogenesis	128/1505	463/18723	4.04535e-37	2.22009e-33	1.98904e-33	DIMT1/RPLP0/RPL24/RPL35A/NMD3/METTL5/NIFK/ISG20L2/RPL5/RPS8/GTPBP10/DDX56/EIF3D/DDX47/EMG1/RPL3/GAR1/SDAD1/LYAR/DDX49/EIF3G/NOP16/RPS14/MRPL22/WDR36/RPF2/LTV1/PRMT5/WDR43/RPL35/ESF1/RPP38/RPS21/EIF3E/PIH1D2/TFB2M/DHX9/LSM6/ABCE1/POP5/NUDT21/PRMT7/EIF3K/RPS19/SNRPD2/RPS5/RPL23A/METTL16/UTP18/RPL27/FTSJ3/EIF4A3/UTP15/TAF9/SHQ1/RBM5/RPL10A/HSP90AB1/POP7/PTEN/NPM3/DDX21/RPS24/CLNS1A/WDR74/UTP14A/RPL6…	128
BP	GO:0002181	cytoplasmic translation	69/1505	148/18723	2.1599e-36	5.92676e-33	5.30994e-33	RPL21/RPS18/RPLP0/RPL24/RPL35A/RPL22L1/DPH5/RPL5/RPS8/EIF3D/RPL3/RPL9/EIF3G/EEF2/RPS14/RPS12/RPS29/RPS27A/RPL35/RPL12/RPS21/EIF3E/RPS3/RPL22/DHX9/RPS3A/DRG1/EIF3K/RPS19/RPL18/RPS11/RPS5/RPL23A/EIF4A1/RPL23/RPL19/RPL27/RPL10A/RPS24/RBM4/RPL36A/RPL31/RPL6/RPS26/EIF3L/RPS20/RPL11/RPS2/RPL15/RPLP2/EIF4B/RPS15/NCK1/RPL18A/UBA52/RPS7/YTHDF2/EIF3H/RPS25/DENR/RPL13/RPS16/RPL13A/RPL28/RPS9/CNBP/RPL29/RPL3…	69
BP	GO:0042254	ribosome biogenesis	94/1505	299/18723	2.94474e-32	5.3869e-29	4.82627e-29	DIMT1/RPLP0/RPL24/RPL35A/NMD3/METTL5/NIFK/ISG20L2/RPL5/RPS8/GTPBP10/DDX56/DDX47/EMG1/RPL3/GAR1/SDAD1/LYAR/DDX49/NOP16/RPS14/MRPL22/WDR36/RPF2/LTV1/WDR43/RPL35/ESF1/RPP38/RPS21/PIH1D2/TFB2M/LSM6/ABCE1/POP5/RPS19/RPS5/RPL23A/METTL16/UTP18/RPL27/FTSJ3/EIF4A3/UTP15/SHQ1/RPL10A/POP7/PTEN/NPM3/DDX21/RPS24/WDR74/UTP14A/RPL6/DDX28/NOP9/GTF3A/WDR12/NPM1/RPL11/DDX3X/WDR46/BYSL/MTERF4/RSL1D1/TRAF7/HEATR1/UR…	94
BP	GO:0034660	ncRNA metabolic process	110/1505	485/18723	4.55773e-24	6.25321e-21	5.60242e-21	DIMT1/URM1/TRMT10C/QTRT2/RPL35A/SSB/METTL5/NIFK/FARSB/ZBTB8OS/RPL5/TYW3/RPS8/DDX56/METTL1/RTCB/DDX47/EMG1/GAR1/LYAR/DDX49/RPS14/THG1L/WDR36/MTO1/RPF2/RARS2/MTFMT/WDR43/RPL35/ESF1/RPP38/RPS21/PIH1D2/TFB2M/RC3H1/INTS7/LSM6/GATC/POP5/RPS19/INTS2/METTL16/UTP18/RPL27/FTSJ3/EIF4A3/UTP15/SHQ1/LARS2/RPL10A/POP7/NPM3/DDX21/RPS24/WDR74/UTP14A/HSD17B10/LARP7/KTI12/NOP9/PNPT1/WDR12/RPL11/MEPCE/DDX3X/WDR46/BY…	110
BP	GO:0034470	ncRNA processing	96/1505	395/18723	1.93642e-23	2.12541e-20	1.90421e-20	DIMT1/URM1/TRMT10C/QTRT2/RPL35A/SSB/METTL5/NIFK/ZBTB8OS/RPL5/TYW3/RPS8/DDX56/METTL1/RTCB/DDX47/EMG1/GAR1/LYAR/DDX49/RPS14/THG1L/WDR36/MTO1/RPF2/MTFMT/WDR43/RPL35/ESF1/RPP38/RPS21/PIH1D2/TFB2M/INTS7/LSM6/POP5/RPS19/INTS2/METTL16/UTP18/RPL27/FTSJ3/EIF4A3/UTP15/SHQ1/RPL10A/POP7/NPM3/DDX21/RPS24/WDR74/UTP14A/HSD17B10/LARP7/KTI12/NOP9/WDR12/RPL11/DDX3X/WDR46/BYSL/SMAD2/MTERF4/RSL1D1/SRRT/AGO1/TRUB1/IN…	96
BP	GO:0006364	rRNA processing	69/1505	225/18723	2.85466e-23	2.61106e-20	2.33931e-20	DIMT1/RPL35A/METTL5/NIFK/RPL5/RPS8/DDX56/DDX47/EMG1/GAR1/LYAR/DDX49/RPS14/WDR36/RPF2/WDR43/RPL35/ESF1/RPP38/RPS21/PIH1D2/TFB2M/LSM6/POP5/RPS19/METTL16/UTP18/RPL27/FTSJ3/EIF4A3/UTP15/SHQ1/RPL10A/POP7/NPM3/DDX21/RPS24/WDR74/UTP14A/NOP9/WDR12/RPL11/WDR46/BYSL/MTERF4/RSL1D1/HEATR1/EBNA1BP2/DKC1/RRP7A/RPS15/PWP2/RPS7/KAT2B/C1D/REXO4/YTHDF2/XRN2/NOP56/BOP1/RPS25/DDX10/NOP58/MPHOSPH6/UTP4/RPS16/DDX52/WD…	69
BP	GO:0016072	rRNA metabolic process	69/1505	236/18723	5.91632e-22	4.6384e-19	4.15566e-19	DIMT1/RPL35A/METTL5/NIFK/RPL5/RPS8/DDX56/DDX47/EMG1/GAR1/LYAR/DDX49/RPS14/WDR36/RPF2/WDR43/RPL35/ESF1/RPP38/RPS21/PIH1D2/TFB2M/LSM6/POP5/RPS19/METTL16/UTP18/RPL27/FTSJ3/EIF4A3/UTP15/SHQ1/RPL10A/POP7/NPM3/DDX21/RPS24/WDR74/UTP14A/NOP9/WDR12/RPL11/WDR46/BYSL/MTERF4/RSL1D1/HEATR1/EBNA1BP2/DKC1/RRP7A/RPS15/PWP2/RPS7/KAT2B/C1D/REXO4/YTHDF2/XRN2/NOP56/BOP1/RPS25/DDX10/NOP58/MPHOSPH6/UTP4/RPS16/DDX52/WD…	69
BP	GO:0008380	RNA splicing	85/1505	434/18723	8.4862e-15	5.82153e-12	5.21566e-12	HSPA8/SON/FXR1/MBNL1/CWC22/ZBTB8OS/SNRNP40/KDM1A/ZRANB2/LSM5/LSM8/RBM28/ZCRB1/RTCB/DDX47/MAGOHB/CDC40/PRMT5/RBM23/HNRNPC/RBM25/SRSF7/SNRPB2/ESRP1/TARDBP/DHX9/PLRG1/LSM6/PRMT7/SNRPD2/METTL16/EIF4A3/SREK1IP1/RBM5/SRSF3/CDC5L/CLNS1A/RBM4/NONO/RBM3/LARP7/PRPF38B/RPS26/DHX15/ZNF638/NPM1/CD2BP2/SNRNP48/DDX39B/TXNL4A/LUC7L/BUD31/RNPS1/SMNDC1/SFPQ/RRAGC/PUF60/CDK13/PAXBP1/RP9/TMBIM6/DDX23/STRAP/GEMIN5/HN…	85
BP	GO:0140014	mitotic nuclear division	63/1505	287/18723	1.3484e-13	8.22226e-11	7.36653e-11	BMP4/RPL24/PSRC1/CDCA8/RACGAP1/IGF1/NCAPG/DAPK3/PTTG1/PINX1/PRMT5/BUB1B/NUSAP1/PIBF1/TPX2/RMDN1/TPR/NSL1/NEK2/CHEK2/DRG1/CCNB1/KIF22/KIF11/MKI67/CAV2/USP16/SMC2/CENPF/NUF2/KIFC1/CUL7/NAA50/UBE2I/KIF20B/ZWINT/EML3/LRP5/RANBP1/CDC16/NCAPG2/CDK13/NCAPD2/MAD2L1/TACC3/INSR/REEP4/PHIP/NCAPH/CDC42/UBE2C/DSCC1/OBSL1/NCAPD3/SGO2/CDT1/NUP62/UBE2S/KPNB1/CDC27/TRIP13/BOD1/LSM14A	63
BP	GO:0022618	ribonucleoprotein complex assembly	53/1505	220/18723	2.43131e-13	1.33431e-10	1.19544e-10	RPLP0/RPL24/RPL5/EIF3D/RPL3/EIF3G/RPS14/RPF2/PRMT5/EIF3E/PIH1D2/DHX9/NUDT21/PRMT7/EIF3K/RPS19/SNRPD2/RPS5/RPL23A/TAF9/SHQ1/RBM5/HSP90AB1/CLNS1A/RPL6/DDX28/EIF3L/RPL11/CD2BP2/DDX39B/TXNL4A/LUC7L/TRAF7/AGO1/PUF60/EIF4B/DDX23/CPSF6/STRAP/RRP7A/GEMIN5/RPS15/PWP2/DDX1/SNRPB/SRSF6/EIF3H/TGS1/BOP1/DENR/RPL13A/SF3B1/SRSF1	53
BP	GO:0071826	ribonucleoprotein complex subunit organization	53/1505	227/18723	9.21903e-13	4.59946e-10	4.12078e-10	RPLP0/RPL24/RPL5/EIF3D/RPL3/EIF3G/RPS14/RPF2/PRMT5/EIF3E/PIH1D2/DHX9/NUDT21/PRMT7/EIF3K/RPS19/SNRPD2/RPS5/RPL23A/TAF9/SHQ1/RBM5/HSP90AB1/CLNS1A/RPL6/DDX28/EIF3L/RPL11/CD2BP2/DDX39B/TXNL4A/LUC7L/TRAF7/AGO1/PUF60/EIF4B/DDX23/CPSF6/STRAP/RRP7A/GEMIN5/RPS15/PWP2/DDX1/SNRPB/SRSF6/EIF3H/TGS1/BOP1/DENR/RPL13A/SF3B1/SRSF1	53
BP	GO:0031396	regulation of protein ubiquitination	49/1505	210/18723	6.8208e-12	3.11938e-09	2.79473e-09	NMI/KDM1A/RPL5/CAV1/RCHY1/PINX1/ANGPT1/RPS3/RPL23/FANCI/HSP90AB1/PTEN/PSMD10/CAMLG/RPS20/NPM1/NSMCE3/TBC1D7/RPL11/OGT/DDX3X/SOX4/AIMP2/RPS2/SVBP/PRMT3/GNL3L/AMER1/DTX3L/PPIA/DCUN1D1/RBX1/MAD2L1/RPS15/DNAJA1/RPS7/ATG5/RNF111/PRKCE/PELI1/UBE2C/RIPK2/TRIP12/DCUN1D5/UBE2S/HSPBP1/GPS2/PDCD6/UBE3A	49
BP	GO:0000375	RNA splicing, via transesterification reactions	64/1505	324/18723	1.24891e-11	5.0707e-09	4.54298e-09	HSPA8/SON/FXR1/MBNL1/CWC22/SNRNP40/KDM1A/LSM5/LSM8/ZCRB1/MAGOHB/CDC40/PRMT5/RBM23/HNRNPC/RBM25/SRSF7/SNRPB2/DHX9/PLRG1/LSM6/PRMT7/SNRPD2/METTL16/EIF4A3/RBM5/SRSF3/CDC5L/CLNS1A/RBM4/RBM3/LARP7/NPM1/CD2BP2/DDX39B/TXNL4A/LUC7L/BUD31/RNPS1/SMNDC1/SFPQ/PUF60/CDK13/PAXBP1/DDX23/STRAP/GEMIN5/HNRNPM/HNRNPH1/U2AF1/HNRNPK/SYNCRIP/QKI/HNRNPR/DDX1/SNRPB/SRSF6/TGS1/C1QBP/FXR2/HNRNPA1/HNRNPF/SF3B1/SRSF1	64
BP	GO:1903320	regulation of protein modification by small protein conjugation or removal	53/1505	242/18723	1.29355e-11	5.0707e-09	4.54298e-09	NMI/KDM1A/RPL5/CAV1/RCHY1/PINX1/ANGPT1/TRIM21/RPS3/RPL23/FANCI/HSP90AB1/PTEN/PSMD10/CAMLG/RPS20/NPM1/NSMCE3/TBC1D7/RPL11/OGT/DDX3X/SOX4/AIMP2/RPS2/UBE2I/SVBP/TOLLIP/PRMT3/GNL3L/AMER1/DTX3L/PPIA/DCUN1D1/RBX1/MAD2L1/RPS15/DNAJA1/RPS7/ATG5/PIAS1/RNF111/PRKCE/PELI1/UBE2C/RIPK2/TRIP12/DCUN1D5/UBE2S/HSPBP1/GPS2/PDCD6/UBE3A	53
BP	GO:0042273	ribosomal large subunit biogenesis	26/1505	72/18723	2.03257e-11	6.76962e-09	6.06508e-09	RPLP0/RPL24/RPL35A/NIFK/RPL5/RPL3/SDAD1/NOP16/RPF2/RPL35/RPL23A/FTSJ3/RPL10A/WDR74/RPL6/DDX28/GTF3A/WDR12/NPM1/RPL11/RSL1D1/TRAF7/EBNA1BP2/BOP1/HEATR3/RPL14	26
BP	GO:0000377	RNA splicing, via transesterification reactions with bulged adenosine as nucleophile	63/1505	320/18723	2.097e-11	6.76962e-09	6.06508e-09	HSPA8/SON/FXR1/MBNL1/CWC22/SNRNP40/KDM1A/LSM5/LSM8/ZCRB1/MAGOHB/CDC40/PRMT5/RBM23/HNRNPC/RBM25/SRSF7/SNRPB2/DHX9/PLRG1/LSM6/PRMT7/SNRPD2/METTL16/EIF4A3/RBM5/SRSF3/CDC5L/CLNS1A/RBM4/RBM3/LARP7/NPM1/CD2BP2/DDX39B/TXNL4A/LUC7L/BUD31/RNPS1/SFPQ/PUF60/CDK13/PAXBP1/DDX23/STRAP/GEMIN5/HNRNPM/HNRNPH1/U2AF1/HNRNPK/SYNCRIP/QKI/HNRNPR/DDX1/SNRPB/SRSF6/TGS1/C1QBP/FXR2/HNRNPA1/HNRNPF/SF3B1/SRSF1	63
BP	GO:0000398	mRNA splicing, via spliceosome	63/1505	320/18723	2.097e-11	6.76962e-09	6.06508e-09	HSPA8/SON/FXR1/MBNL1/CWC22/SNRNP40/KDM1A/LSM5/LSM8/ZCRB1/MAGOHB/CDC40/PRMT5/RBM23/HNRNPC/RBM25/SRSF7/SNRPB2/DHX9/PLRG1/LSM6/PRMT7/SNRPD2/METTL16/EIF4A3/RBM5/SRSF3/CDC5L/CLNS1A/RBM4/RBM3/LARP7/NPM1/CD2BP2/DDX39B/TXNL4A/LUC7L/BUD31/RNPS1/SFPQ/PUF60/CDK13/PAXBP1/DDX23/STRAP/GEMIN5/HNRNPM/HNRNPH1/U2AF1/HNRNPK/SYNCRIP/QKI/HNRNPR/DDX1/SNRPB/SRSF6/TGS1/C1QBP/FXR2/HNRNPA1/HNRNPF/SF3B1/SRSF1	63
BP	GO:0042255	ribosome assembly	22/1505	61/18723	7.31306e-10	2.22967e-07	1.99762e-07	RPLP0/RPL24/RPL5/RPL3/RPS14/MRPL22/RPF2/RPS19/RPS5/RPL23A/RPL6/DDX28/NPM1/RPL11/DDX3X/MTERF4/TRAF7/RRP7A/RPS15/PWP2/BOP1/C1QBP	22
BP	GO:0000819	sister chromatid segregation	44/1505	202/18723	8.43735e-10	2.43706e-07	2.18343e-07	PSRC1/CDCA8/RACGAP1/NCAPG/PTTG1/PINX1/BUB1B/NUSAP1/PIBF1/RMDN1/TPR/NSL1/NEK2/RAD51C/TOP2A/CCNB1/KIF22/SMC2/CENPF/NUF2/KIFC1/NAA50/ESCO1/SFPQ/MCMBP/ZWINT/TOP2B/EML3/CDC16/NCAPG2/NCAPD2/MAD2L1/TACC3/NCAPH/UBE2C/DSCC1/NCAPD3/SGO2/CDT1/NUP62/KPNB1/CDC27/TRIP13/BOD1	44
BP	GO:0006417	regulation of translation	77/1505	468/18723	1.08276e-09	2.97108e-07	2.66187e-07	RPS6KB1/LTN1/TRMT10C/FXR1/EIF2B5/METTL5/PUM1/DPH5/RPL5/EIF3D/EEF2/DAPK3/RPS14/EIF2S1/PTCD3/EIF2B4/TRUB2/MTRF1/EIF3E/RPS3/RGS2/TARDBP/RPL22/RC3H1/DHX9/TPR/ABCE1/MAPKAPK5/EIF3K/METTL16/EIF4A3/TYMS/RBM4/RBM3/RPS6KA3/USP16/PUM3/PNPT1/CNOT1/NPM1/DDX3X/SOX4/DDX39B/IMPACT/TRAP1/AGO1/CNOT7/PUS7/EIF4B/LARP4/BANK1/EIF4E/HNRNPD/GEMIN5/RACK1/NCK1/FOXO3/SYNCRIP/QKI/THBS1/LRPPRC/HNRNPR/DDX1/YTHDF2/LSM14B/MRPL1…	77
BP	GO:0007059	chromosome segregation	62/1505	346/18723	1.61787e-09	4.22804e-07	3.78801e-07	PUM1/PSRC1/CDCA8/RACGAP1/SMARCAD1/NCAPG/PTTG1/PINX1/NUP43/BUB1B/NUSAP1/NTMT1/PIBF1/RMDN1/RPS3/TPR/NSL1/NEK2/RAD51C/TOP2A/PSMC3IP/BIRC5/CENPH/CCNB1/SKA1/KIF22/MKI67/SMC2/CENPF/NUF2/DDX3X/KIFC1/NAA50/ESCO1/UBE2I/SFPQ/MCMBP/ZWINT/TOP2B/EML3/MUS81/NDC1/CDC16/NCAPG2/NCAPD2/MAD2L1/TACC3/NCAPH/CDC42/ACTR2/CSNK2A1/UBE2C/DSCC1/NCAPD3/SGO2/CDT1/CSNK2A2/NUP62/KPNB1/CDC27/TRIP13/BOD1	62
BP	GO:0000280	nuclear division	73/1505	439/18723	1.83523e-09	4.57807e-07	4.10161e-07	BMP4/RPL24/PSRC1/CDCA8/RACGAP1/IGF1/NCAPG/DAPK3/PTTG1/PINX1/CKS2/PRMT5/BUB1B/NUSAP1/CCNB2/PIBF1/TPX2/RMDN1/TPR/NSL1/NEK2/CHEK2/DRG1/RAD51C/TOP2A/PSMC3IP/CCNB1/KIF22/KIF11/MKI67/CAV2/USP16/SMC2/CENPF/NUF2/KIFC1/CUL7/NAA50/UBE2I/KIF20B/ZWINT/TOP2B/EML3/MUS81/LRP5/NDC1/RANBP1/CDC16/NCAPG2/CDK13/NCAPD2/MAD2L1/TACC3/INSR/REEP4/PHIP/NCAPH/CDC42/ACTR2/UBE2C/DSCC1/OBSL1/NCAPD3/SGO2/CDT1/NUP62/UBE2S/RAD51…	73
BP	GO:0000070	mitotic sister chromatid segregation	38/1505	168/18723	3.91077e-09	9.33144e-07	8.36028e-07	PSRC1/CDCA8/RACGAP1/NCAPG/PTTG1/PINX1/BUB1B/NUSAP1/PIBF1/RMDN1/TPR/NSL1/NEK2/CCNB1/KIF22/SMC2/CENPF/NUF2/KIFC1/NAA50/ZWINT/EML3/CDC16/NCAPG2/NCAPD2/MAD2L1/TACC3/NCAPH/UBE2C/DSCC1/NCAPD3/SGO2/CDT1/NUP62/KPNB1/CDC27/TRIP13/BOD1	38
BP	GO:1904869	regulation of protein localization to Cajal body	9/1505	11/18723	6.49248e-09	1.42523e-06	1.2769e-06	CCT3/CCT2/TCP1/CCT5/LARP7/MEPCE/CCT6A/DKC1/CCT4	9
BP	GO:1904871	positive regulation of protein localization to Cajal body	9/1505	11/18723	6.49248e-09	1.42523e-06	1.2769e-06	CCT3/CCT2/TCP1/CCT5/LARP7/MEPCE/CCT6A/DKC1/CCT4	9
BP	GO:0048285	organelle fission	77/1505	488/18723	7.36836e-09	1.55529e-06	1.39343e-06	BMP4/RPL24/PEX19/PSRC1/CDCA8/RACGAP1/IGF1/NCAPG/DAPK3/PTTG1/PINX1/CKS2/PRMT5/BUB1B/NUSAP1/CCNB2/PIBF1/TPX2/RMDN1/TPR/NSL1/NEK2/CHEK2/DRG1/RAD51C/TOP2A/PSMC3IP/CCNB1/KIF22/KIF11/MKI67/CAV2/USP16/SMC2/CENPF/NUF2/KIFC1/CUL7/NAA50/UBE2I/KIF20B/ZWINT/TOP2B/MCU/EML3/MUS81/LRP5/NDC1/RANBP1/CDC16/NCAPG2/CDK13/DNM1L/NCAPD2/MAD2L1/TACC3/SLC25A46/INSR/REEP4/PHIP/NCAPH/CDC42/ACTR2/UBE2C/DSCC1/OBSL1/NCAPD3/SG…	77
BP	GO:0006413	translational initiation	30/1505	118/18723	9.73248e-09	1.97822e-06	1.77234e-06	RPS6KB1/EIF2B5/EIF3D/EIF3G/MTFMT/EIF2S1/EIF2B4/EIF3E/RPS3/TPR/RPS3A/ABCE1/EIF3K/RPS5/EIF4A1/RBM4/EIF3L/NPM1/DDX3X/IMPACT/EIF4B/BANK1/EIF4E/NCK1/DDX1/YTHDF2/EIF3H/DENR/RPL13A/PAIP1	30
BP	GO:1903405	protein localization to nuclear body	9/1505	12/18723	2.41042e-08	4.42607e-06	3.96543e-06	CCT3/CCT2/TCP1/CCT5/LARP7/MEPCE/CCT6A/DKC1/CCT4	9
BP	GO:1904867	protein localization to Cajal body	9/1505	12/18723	2.41042e-08	4.42607e-06	3.96543e-06	CCT3/CCT2/TCP1/CCT5/LARP7/MEPCE/CCT6A/DKC1/CCT4	9
BP	GO:0007346	regulation of mitotic cell cycle	72/1505	457/18723	2.4195e-08	4.42607e-06	3.96543e-06	CDK2/RPS6KB1/BMP4/BTG1/SIRT1/ATF2/CKS1B/IGF1/PTPN6/DAPK3/PINX1/CKS2/PSME2/PRMT5/APEX1/BUB1B/NUSAP1/MSH2/ID2/TPR/NEK2/PLRG1/CHEK2/RFWD3/RAD51C/SLFN11/CCNB1/PTEN/MKI67/CAV2/CENPF/MEPCE/DDX3X/CUL7/SOX4/KIF20B/ZWINT/MUS81/LRP5/CCND1/DYNLT3/TFDP1/CDC16/HES1/CDK13/BID/MAD2L1/EIF4E/LSM11/INSR/BABAM1/SIK1/FZD3/PHIP/YTHDC2/TMOD3/PSME1/CDC42/NACC2/RNASEH2B/RBL1/UBE2C/OBSL1/BTG2/PTPN11/CDT1/RBL2/NUP62/PRKCA…	72
BP	GO:0034504	protein localization to nucleus	52/1505	290/18723	3.25197e-08	5.66865e-06	5.07869e-06	BMP4/NMD3/SUMO1/CCT3/CCT2/PINX1/RPF2/TCP1/ANGPT1/TARDBP/TPR/PLRG1/TRIM28/RPL23/KPNA2/IPO11/CCT5/HSP90AB1/LARP7/PARP9/NPM1/RPL11/MEPCE/BYSL/TAF8/CCT6A/WRN/DKC1/DTX3L/TFRC/SMO/SUN2/RANGAP1/FERMT2/PYGO1/POLR1A/XPO1/CCT4/IPO5/SRC/CSE1L/ZBTB16/IPO7/DVL1/HEATR3/NUP93/NUP62/COL1A1/KPNB1/ORMDL3/TNPO1/APPL1	52
BP	GO:0042274	ribosomal small subunit biogenesis	22/1505	73/18723	3.30534e-08	5.66865e-06	5.07869e-06	RPS8/EMG1/RPS14/LTV1/RPS21/LSM6/RPS19/RPS5/RPS24/NOP9/NPM1/WDR46/BYSL/HEATR1/RRP7A/RPS15/PWP2/RPS7/RPS25/UTP4/RPS16/DDX52	22
BP	GO:1900182	positive regulation of protein localization to nucleus	24/1505	87/18723	5.33751e-08	8.87643e-06	7.95263e-06	NMD3/CCT3/CCT2/PINX1/TCP1/TARDBP/TPR/TRIM28/CCT5/HSP90AB1/LARP7/PARP9/NPM1/MEPCE/CCT6A/DKC1/DTX3L/TFRC/SMO/FERMT2/CCT4/IPO5/SRC/ORMDL3	24
BP	GO:2000058	regulation of ubiquitin-dependent protein catabolic process	35/1505	164/18723	7.55367e-08	1.20738e-05	1.08172e-05	CDK2/SUMO1/RPL5/CAV1/RCHY1/CSNK1A1/SOCS4/RPL23/TAF9/HSP90AB1/PTEN/PSMD10/CAMLG/RPL11/OGT/USP5/RBX1/DESI1/RACK1/KEAP1/RPS7/PIAS1/STYX/ARIH1/XPO1/CSNK2A1/EIF3H/UBE2V2/UCHL5/DVL1/CSNK2A2/HSPBP1/SUMO2/HECTD1/UBE3A	35
BP	GO:0140053	mitochondrial gene expression	27/1505	108/18723	7.7001e-08	1.20738e-05	1.08172e-05	TRMT10C/FASTKD1/MRPS35/MRPL51/MTO1/RARS2/PTCD3/TRUB2/MTRF1/TFB2M/GATC/MRPL12/LARS2/CHCHD1/HSD17B10/PNPT1/MTERF4/TUFM/NOA1/FOXO3/QRSL1/LRPPRC/IARS2/SLC25A33/DARS2/SARS2/C1QBP	27
BP	GO:0031397	negative regulation of protein ubiquitination	23/1505	83/18723	9.19251e-08	1.40135e-05	1.2555e-05	RPL5/CAV1/PINX1/RPS3/RPL23/CAMLG/RPS20/RPL11/OGT/SOX4/SVBP/PRMT3/GNL3L/DTX3L/PPIA/MAD2L1/RPS15/DNAJA1/RPS7/ATG5/PRKCE/TRIP12/GPS2	23
BP	GO:0007088	regulation of mitotic nuclear division	27/1505	110/18723	1.15887e-07	1.71889e-05	1.54e-05	BMP4/IGF1/DAPK3/PRMT5/BUB1B/NUSAP1/TPR/NEK2/CCNB1/MKI67/CAV2/CENPF/CUL7/KIF20B/ZWINT/LRP5/CDC16/CDK13/MAD2L1/INSR/PHIP/CDC42/OBSL1/CDT1/NUP62/CDC27/TRIP13	27
BP	GO:1903311	regulation of mRNA metabolic process	50/1505	288/18723	1.69358e-07	2.44589e-05	2.19133e-05	HSPA8/SON/FXR1/MBNL1/CWC22/FASTKD1/PUM1/SERBP1/RBM23/HNRNPC/APEX1/RBM25/SRSF7/TARDBP/RC3H1/DHX9/NUDT21/METTL16/CCNB1/RBM5/SRSF3/RBM4/RBM3/LARP7/PNPT1/CNOT1/NPM1/RNPS1/CNOT7/PABPC4/PUF60/CPSF6/HNRNPD/SAFB/HNRNPM/HNRNPK/SYNCRIP/QKI/SLTM/HNRNPR/YTHDF2/SRSF6/BTG2/PRKCA/C1QBP/FXR2/NT5C3B/PAIP1/IWS1/HNRNPA1	50
BP	GO:1990173	protein localization to nucleoplasm	9/1505	14/18723	1.88998e-07	2.65954e-05	2.38275e-05	CCT3/CCT2/TCP1/CCT5/LARP7/MEPCE/CCT6A/DKC1/CCT4	9
BP	GO:0098813	nuclear chromosome segregation	49/1505	281/18723	1.95475e-07	2.68191e-05	2.4028e-05	PSRC1/CDCA8/RACGAP1/NCAPG/PTTG1/PINX1/BUB1B/NUSAP1/PIBF1/RMDN1/TPR/NSL1/NEK2/RAD51C/TOP2A/PSMC3IP/CCNB1/KIF22/SMC2/CENPF/NUF2/KIFC1/NAA50/ESCO1/SFPQ/MCMBP/ZWINT/TOP2B/EML3/MUS81/NDC1/CDC16/NCAPG2/NCAPD2/MAD2L1/TACC3/NCAPH/CDC42/ACTR2/UBE2C/DSCC1/NCAPD3/SGO2/CDT1/NUP62/KPNB1/CDC27/TRIP13/BOD1	49
BP	GO:0006403	RNA localization	39/1505	201/18723	2.04574e-07	2.7383e-05	2.45331e-05	SSB/CCT3/NUP205/CCT2/TST/MAGOHB/CETN3/NUP43/TCP1/SRSF7/DHX9/TPR/EIF4A3/CCT5/SHQ1/SRSF3/PNPT1/NPM1/DDX39B/CCT6A/NDC1/DKC1/FYTTD1/CPSF6/QKI/THOC3/LRPPRC/XPO1/CCT4/AGFG1/AHCTF1/NOP58/NUP93/NUP62/IWS1/YY1/THOC7/HNRNPA1/SRSF1	39
BP	GO:1900180	regulation of protein localization to nucleus	30/1505	136/18723	2.97026e-07	3.88114e-05	3.47721e-05	BMP4/NMD3/SUMO1/CCT3/CCT2/PINX1/TCP1/ANGPT1/TARDBP/TPR/TRIM28/CCT5/HSP90AB1/LARP7/PARP9/NPM1/MEPCE/BYSL/CCT6A/DKC1/DTX3L/TFRC/SMO/FERMT2/POLR1A/CCT4/IPO5/SRC/NUP62/ORMDL3	30
BP	GO:1903321	negative regulation of protein modification by small protein conjugation or removal	24/1505	95/18723	3.25519e-07	4.15453e-05	3.72215e-05	RPL5/CAV1/PINX1/TRIM21/RPS3/RPL23/CAMLG/RPS20/RPL11/OGT/SOX4/SVBP/PRMT3/GNL3L/DTX3L/PPIA/MAD2L1/RPS15/DNAJA1/RPS7/ATG5/PRKCE/TRIP12/GPS2	24
BP	GO:0050684	regulation of mRNA processing	30/1505	137/18723	3.51462e-07	4.38369e-05	3.92746e-05	HSPA8/SON/FXR1/MBNL1/CWC22/RBM23/RBM25/SRSF7/DHX9/NUDT21/METTL16/CCNB1/RBM5/SRSF3/RBM4/RBM3/LARP7/NPM1/RNPS1/PUF60/CPSF6/SAFB/HNRNPK/QKI/SLTM/SRSF6/C1QBP/FXR2/IWS1/HNRNPA1	30
BP	GO:1904666	regulation of ubiquitin protein ligase activity	11/1505	23/18723	4.76675e-07	5.81332e-05	5.20831e-05	RPL5/RPL23/PTEN/RPS20/RPL11/DNM1L/MAD2L1/RPS15/RPS7/UBE2C/UBE2S	11
BP	GO:0000727	double-strand break repair via break-induced replication	8/1505	12/18723	6.31692e-07	7.37602e-05	6.60837e-05	MCM3/MCM7/MUS81/MCM2/CDC45/MCM5/MCM4/MCM6	8
BP	GO:1904816	positive regulation of protein localization to chromosome, telomeric region	8/1505	12/18723	6.31692e-07	7.37602e-05	6.60837e-05	CCT3/CCT2/TCP1/CCT5/CCT6A/GNL3L/DKC1/CCT4	8
BP	GO:0071897	DNA biosynthetic process	35/1505	180/18723	8.04593e-07	9.19918e-05	8.24178e-05	SIRT1/RFC4/CCT3/CCT2/GAR1/RCHY1/PINX1/TCP1/HNRNPC/POLE2/PCNA/GRHL2/KCNK2/NEK2/MAPKAPK5/CCT5/HSP90AB1/TYMS/CENPF/DDX39B/CCT6A/WRN/GNL3L/DKC1/TFDP1/POLD2/HNRNPD/CCT4/SRC/DSCC1/POLD1/TK1/TEN1/PHB/HNRNPA1	35
BP	GO:0010498	proteasomal protein catabolic process	71/1505	490/18723	8.22999e-07	9.21759e-05	8.25827e-05	CDK2/SIRT1/LTN1/SUMO1/CAV1/PSMA2/FOXRED2/RCHY1/FBXO38/CSNK1A1/ALAD/PSME2/SOCS4/PSMA3/KBTBD7/CUL5/RNF121/RNFT1/PSMB3/TMUB2/DERL2/TAF9/HSP90AB1/PSMB9/PSMD10/CAMLG/DCAF11/UBR3/APPBP2/RPL11/PCNP/OGT/PSMB8/ATE1/CDC16/PSMA5/CUL1/TBL1XR1/USP5/RBX1/DESI1/UBE2D3/ARMC8/RACK1/UBXN6/KEAP1/PIAS1/STYX/KLHDC1/PSME1/ARIH1/RMND5A/XPO1/PELI1/RBCK1/UBE2C/EIF3H/UBE2V2/UCHL5/DVL1/TRIM2/PSMB10/UBE2S/HSPBP1/SUMO2/CDC27…	71
BP	GO:0045787	positive regulation of cell cycle	51/1505	313/18723	9.50666e-07	0.000102688	9.20007e-05	RPS6KB1/CKS1B/PSRC1/RACGAP1/IGF1/CKS2/PGGT1B/APEX1/NUSAP1/TRIM21/ZBED6/TPR/PLRG1/CHEK2/RAD51C/CCNB1/PSMD10/PLK4/NPM1/MEPCE/DDX3X/DDX39B/SFPQ/FGFR2/KIF20B/LRP5/CCND1/DYNLT3/RANBP1/TFDP1/CDC16/GPSM2/HES1/RHNO1/MAD2L1/EIF4E/LSM11/INSR/PHIP/YTHDC2/TMOD3/PRKCE/CDC42/SRC/UBE2C/PTPN11/CDT1/CCNT2/NUP62/PRKCA/CDC27	51
BP	GO:1903050	regulation of proteolysis involved in cellular protein catabolic process	40/1505	221/18723	9.54278e-07	0.000102688	9.20007e-05	CDK2/SUMO1/RPL5/CAV1/RCHY1/CSNK1A1/ALAD/PSME2/SOCS4/RNFT1/RPL23/TAF9/HSP90AB1/PTEN/PSMD10/CAMLG/RPL11/OGT/USP5/RBX1/DESI1/RACK1/KEAP1/RPS7/PIAS1/STYX/PSME1/ARIH1/XPO1/CSNK2A1/EIF3H/UBE2V2/UCHL5/DVL1/CSNK2A2/HSPBP1/SUMO2/HECTD1/UBE3A/NUDT15	40
BP	GO:0045727	positive regulation of translation	29/1505	136/18723	9.82534e-07	0.000103695	9.29032e-05	RPS6KB1/TRMT10C/FXR1/EIF2B5/METTL5/RPL5/EIF3D/EEF2/TRUB2/EIF3E/DHX9/EIF4A3/RBM3/USP16/NPM1/DDX3X/SOX4/DDX39B/IMPACT/LARP4/HNRNPD/NCK1/THBS1/YTHDF2/RPS9/C1QBP/FXR2/PAIP1/CNBP	29
BP	GO:0002183	cytoplasmic translational initiation	13/1505	34/18723	1.03527e-06	0.000107199	9.60426e-05	EIF3D/EIF3G/EIF3E/EIF3K/EIF4A1/RBM4/EIF3L/EIF4B/NCK1/YTHDF2/EIF3H/DENR/RPL13A	13
BP	GO:1903362	regulation of cellular protein catabolic process	44/1505	255/18723	1.08822e-06	0.000110595	9.90852e-05	CDK2/CD81/SUMO1/RPL5/CAV1/RCHY1/CSNK1A1/ALAD/PSME2/SOCS4/RNFT1/RPL23/TAF9/HSP90AB1/PTEN/PSMD10/CAMLG/RPL11/RNF128/OGT/AMER1/USP5/RBX1/DESI1/RACK1/KEAP1/RPS7/PIAS1/STYX/PSME1/ARIH1/XPO1/CSNK2A1/EIF3H/UBE2V2/UCHL5/DVL1/CSNK2A2/HSPBP1/SUMO2/LRP2/HECTD1/UBE3A/NUDT15	44
BP	GO:1903829	positive regulation of cellular protein localization	46/1505	276/18723	1.69469e-06	0.000169099	0.000151501	CD81/ITGB1/NMD3/CCT3/CCT2/PINX1/TCP1/CCDC88A/TARDBP/TPR/TRIM28/CCT5/HSP90AB1/RAB11FIP2/LARP7/PARP9/NPM1/MEPCE/GPD1L/CCT6A/MAPK8/RHOU/PAK1/GNL3L/DKC1/DTX3L/GPSM2/TFRC/SMO/CACNB3/UBE2D3/RACK1/ATP2C1/ABHD17B/FERMT2/PRKCE/RTN4/CCT4/IPO5/SRC/RER1/CDT1/CSNK2A2/NUP62/STAC2/ORMDL3	46
BP	GO:1904851	positive regulation of establishment of protein localization to telomere	7/1505	10/18723	2.06653e-06	0.00020252	0.000181443	CCT3/CCT2/TCP1/CCT5/CCT6A/DKC1/CCT4	7
BP	GO:0031398	positive regulation of protein ubiquitination	26/1505	119/18723	2.17651e-06	0.000209556	0.000187747	NMI/KDM1A/CAV1/RCHY1/ANGPT1/FANCI/PTEN/PSMD10/NPM1/NSMCE3/TBC1D7/DDX3X/AIMP2/RPS2/AMER1/DCUN1D1/RBX1/RNF111/PELI1/UBE2C/RIPK2/DCUN1D5/UBE2S/HSPBP1/PDCD6/UBE3A	26
BP	GO:0032434	regulation of proteasomal ubiquitin-dependent protein catabolic process	28/1505	134/18723	2.29442e-06	0.000217099	0.000194505	CDK2/SUMO1/CAV1/RCHY1/CSNK1A1/SOCS4/TAF9/HSP90AB1/PSMD10/CAMLG/RPL11/OGT/USP5/RBX1/DESI1/RACK1/KEAP1/PIAS1/STYX/ARIH1/XPO1/EIF3H/UBE2V2/UCHL5/DVL1/HSPBP1/SUMO2/HECTD1	28
BP	GO:2000278	regulation of DNA biosynthetic process	24/1505	106/18723	2.72994e-06	0.000253931	0.000227503	RFC4/CCT3/CCT2/PINX1/TCP1/HNRNPC/PCNA/GRHL2/KCNK2/NEK2/MAPKAPK5/CCT5/HSP90AB1/DDX39B/CCT6A/GNL3L/DKC1/TFDP1/HNRNPD/CCT4/SRC/DSCC1/TEN1/HNRNPA1	24
BP	GO:0000054	ribosomal subunit export from nucleus	8/1505	14/18723	3.3088e-06	0.000292882	0.000262401	NMD3/SDAD1/LTV1/ABCE1/NOP9/NPM1/RPS15/XPO1	8
BP	GO:0033750	ribosome localization	8/1505	14/18723	3.3088e-06	0.000292882	0.000262401	NMD3/SDAD1/LTV1/ABCE1/NOP9/NPM1/RPS15/XPO1	8
BP	GO:1904814	regulation of protein localization to chromosome, telomeric region	8/1505	14/18723	3.3088e-06	0.000292882	0.000262401	CCT3/CCT2/TCP1/CCT5/CCT6A/GNL3L/DKC1/CCT4	8
BP	GO:0000027	ribosomal large subunit assembly	11/1505	27/18723	3.39936e-06	0.000296122	0.000265303	RPLP0/RPL24/RPL5/RPL3/RPF2/RPL23A/RPL6/DDX28/RPL11/TRAF7/BOP1	11
BP	GO:0051098	regulation of binding	55/1505	363/18723	3.66405e-06	0.000314192	0.000281493	BMP4/ACTB/NMD3/SUMO1/KDM1A/PEX19/CAV1/IGF1/EIF3D/ADRB2/CSNK1A1/PINX1/EIF2S1/CALM2/EIF3E/ANGPT1/TRIM21/DHX9/NEK2/PRMT7/TRIM28/EIF4A3/HSP90AB1/DKK1/PARP9/RPL11/MEPCE/DTNBP1/SMAD2/ARHGAP28/MAPK8/GNL3L/DTX3L/HES1/SMO/SRI/TMBIM6/ADD1/RACK1/NSD1/HMGB2/HDAC2/STYX/CDC42/STMN1/MAPRE1/CPNE1/SRC/RIPK2/DVL1/RALB/CDT1/AKTIP/SYMPK/HDAC5	55
BP	GO:0048024	regulation of mRNA splicing, via spliceosome	23/1505	101/18723	3.94487e-06	0.000333068	0.000298404	HSPA8/SON/FXR1/MBNL1/CWC22/RBM23/RBM25/SRSF7/METTL16/RBM5/SRSF3/RBM4/RBM3/LARP7/NPM1/RNPS1/PUF60/HNRNPK/QKI/SRSF6/C1QBP/FXR2/HNRNPA1	23
BP	GO:1903322	positive regulation of protein modification by small protein conjugation or removal	28/1505	138/18723	4.19738e-06	0.000344598	0.000308735	NMI/KDM1A/CAV1/RCHY1/ANGPT1/FANCI/PTEN/PSMD10/NPM1/NSMCE3/TBC1D7/DDX3X/AIMP2/RPS2/TOLLIP/AMER1/DCUN1D1/RBX1/PIAS1/RNF111/PELI1/UBE2C/RIPK2/DCUN1D5/UBE2S/HSPBP1/PDCD6/UBE3A	28
BP	GO:0006473	protein acetylation	36/1505	201/18723	4.20701e-06	0.000344598	0.000308735	SIRT1/ATF2/TADA1/TAF9/MORF4L2/EID1/MAP3K7/FAM161A/EPC2/OGT/DDX3X/SOX4/NAA50/ESCO1/TAF5L/MSL3/ZZZ3/YEATS2/YEATS4/BRD1/MBD3/HINT2/HDAC2/ATG5/KAT2B/NAA30/DSCC1/SMARCB1/NAA15/SPHK2/TADA2A/MED24/MSL1/KANSL1/IWS1/MORF4L1	36
BP	GO:0043161	proteasome-mediated ubiquitin-dependent protein catabolic process	60/1505	412/18723	4.9098e-06	0.00039625	0.000355011	CDK2/SIRT1/LTN1/SUMO1/CAV1/PSMA2/FOXRED2/RCHY1/FBXO38/CSNK1A1/SOCS4/KBTBD7/CUL5/RNF121/PSMB3/TMUB2/DERL2/TAF9/HSP90AB1/PSMD10/CAMLG/DCAF11/UBR3/APPBP2/RPL11/PCNP/OGT/CDC16/PSMA5/CUL1/TBL1XR1/USP5/RBX1/DESI1/UBE2D3/ARMC8/RACK1/KEAP1/PIAS1/STYX/KLHDC1/ARIH1/RMND5A/XPO1/PELI1/RBCK1/UBE2C/EIF3H/UBE2V2/UCHL5/DVL1/TRIM2/UBE2S/HSPBP1/SUMO2/CDC27/DNAJC10/FBXW11/HECTD1/RNF186	60
BP	GO:0001701	in utero embryonic development	55/1505	367/18723	5.119e-06	0.000407146	0.000364773	BMPR1A/ITGB1/GABPA/MBNL1/ATF2/CASP8/NASP/IGF1/EMG1/CCNB2/COPS2/MSH2/ANGPT1/GRHL2/ZBED6/NEK2/TRIM28/CCNB1/WDR74/ASF1B/PLK4/CNOT1/BYSL/TAF8/SMAD2/FGFR2/TET1/ST14/ASCL2/PHF6/CPT2/HES1/NCAPG2/SMO/RRP7A/MBD3/KEAP1/ZFAND5/FUT8/ADAM10/DNAAF2/BIRC6/RTN4/RRM2/RNASEH2B/LPAR6/HINFP/VASH2/SLC30A1/SMARCB1/RPL13/B9D1/RUNDC1/HECTD1/PTPN18	55
BP	GO:0070203	regulation of establishment of protein localization to telomere	7/1505	11/18723	5.28635e-06	0.00041445	0.000371317	CCT3/CCT2/TCP1/CCT5/CCT6A/DKC1/CCT4	7
BP	GO:0033044	regulation of chromosome organization	34/1505	187/18723	5.48457e-06	0.000420178	0.000376449	CCT3/CCT2/PTTG1/PINX1/TCP1/HNRNPC/BUB1B/TPR/NEK2/MAPKAPK5/TRIM28/TOP2A/CCNB1/CCT5/CENPF/CCT6A/SFPQ/ZWINT/GNL3L/MCM2/DKC1/CDC16/MAD2L1/HNRNPD/TACC3/SENP6/CCT4/SRC/UBE2C/CDT1/TEN1/CDC27/TRIP13/HNRNPA1	34
BP	GO:0006399	tRNA metabolic process	33/1505	179/18723	5.51254e-06	0.000420178	0.000376449	URM1/TRMT10C/QTRT2/SSB/FARSB/ZBTB8OS/TYW3/METTL1/RTCB/THG1L/MTO1/RARS2/MTFMT/RPP38/LSM6/GATC/POP5/LARS2/POP7/HSD17B10/KTI12/TRUB1/PUS7/QRSL1/DDX1/CARS2/DTD1/IARS2/DARS2/MARS2/CTU2/SARS2/TSEN34	33
BP	GO:0043484	regulation of RNA splicing	29/1505	148/18723	5.87482e-06	0.000441657	0.000395692	HSPA8/SON/FXR1/MBNL1/CWC22/RBM23/RBM25/SRSF7/ESRP1/METTL16/RBM5/SRSF3/RBM4/RBM3/LARP7/RPS26/NPM1/RNPS1/PUF60/TMBIM6/HNRNPH1/HNRNPK/QKI/SRSF6/C1QBP/FXR2/HNRNPA1/HNRNPF/SRSF1	29
BP	GO:0071428	rRNA-containing ribonucleoprotein complex export from nucleus	8/1505	15/18723	6.589e-06	0.000482139	0.000431961	NMD3/SDAD1/LTV1/ABCE1/NOP9/NPM1/RPS15/XPO1	8
BP	GO:1904874	positive regulation of telomerase RNA localization to Cajal body	8/1505	15/18723	6.589e-06	0.000482139	0.000431961	CCT3/CCT2/TCP1/CCT5/SHQ1/CCT6A/DKC1/CCT4	8
BP	GO:0046931	pore complex assembly	9/1505	20/18723	1.01578e-05	0.000733501	0.000657163	CCT3/TSPAN33/NUP205/PDZD11/NDC1/ADAM10/RTN4/AHCTF1/NUP93	9
BP	GO:0018394	peptidyl-lysine acetylation	31/1505	169/18723	1.16448e-05	0.000790187	0.000707949	SIRT1/ATF2/TADA1/TAF9/MORF4L2/EID1/MAP3K7/EPC2/OGT/SOX4/NAA50/ESCO1/TAF5L/MSL3/ZZZ3/YEATS2/YEATS4/BRD1/MBD3/HINT2/HDAC2/ATG5/KAT2B/SMARCB1/SPHK2/TADA2A/MED24/MSL1/KANSL1/IWS1/MORF4L1	31
BP	GO:0051052	regulation of DNA metabolic process	53/1505	359/18723	1.16716e-05	0.000790187	0.000707949	SIRT1/RFC4/KDM1A/CCT3/CCT2/SMARCAD1/PINX1/TCP1/PRMT5/HNRNPC/MSH2/PCNA/GRHL2/RPS3/NMNAT1/DHX9/KCNK2/NEK2/MAPKAPK5/TRIM28/KPNA2/SUB1/CCT5/HSP90AB1/PARP9/NPM1/SMCHD1/DDX39B/CCT6A/WRN/KMT5B/GNL3L/DKC1/TFDP1/USP1/DTX3L/TFRC/PIK3CA/RAD52/HNRNPD/MBD3/BABAM1/MSH6/CCT4/ACTR2/SRC/DSCC1/UBE2V2/TRIP12/CDT1/TEN1/TP53BP1/HNRNPA1	53
BP	GO:0070202	regulation of establishment of protein localization to chromosome	7/1505	12/18723	1.18029e-05	0.000790187	0.000707949	CCT3/CCT2/TCP1/CCT5/CCT6A/DKC1/CCT4	7
BP	GO:1904667	negative regulation of ubiquitin protein ligase activity	7/1505	12/18723	1.18029e-05	0.000790187	0.000707949	RPL5/RPL23/RPS20/RPL11/MAD2L1/RPS15/RPS7	7
BP	GO:0032210	regulation of telomere maintenance via telomerase	15/1505	53/18723	1.18067e-05	0.000790187	0.000707949	CCT3/CCT2/PINX1/TCP1/HNRNPC/NEK2/MAPKAPK5/CCT5/CCT6A/GNL3L/DKC1/CCT4/SRC/TEN1/HNRNPA1	15
BP	GO:0051438	regulation of ubiquitin-protein transferase activity	15/1505	53/18723	1.18067e-05	0.000790187	0.000707949	RPL5/RPL23/PTEN/RPS20/RPL11/RPS2/DTX3L/DCUN1D1/DNM1L/MAD2L1/RPS15/RPS7/UBE2C/DCUN1D5/UBE2S	15
BP	GO:2000232	regulation of rRNA processing	8/1505	16/18723	1.22472e-05	0.000809792	0.000725513	DIMT1/WDR43/UTP15/SHQ1/HEATR1/KAT2B/YTHDF2/WDR75	8
BP	GO:2000573	positive regulation of DNA biosynthetic process	17/1505	66/18723	1.25897e-05	0.000822528	0.000736924	RFC4/CCT3/CCT2/TCP1/PCNA/GRHL2/NEK2/MAPKAPK5/CCT5/HSP90AB1/DDX39B/CCT6A/DKC1/CCT4/SRC/DSCC1/HNRNPA1	17
BP	GO:0034250	positive regulation of cellular amide metabolic process	30/1505	162/18723	1.32049e-05	0.000852567	0.000763837	RPS6KB1/TRMT10C/FXR1/EIF2B5/METTL5/RPL5/EIF3D/EEF2/TRUB2/EIF3E/DHX9/EIF4A3/RBM3/USP16/NPM1/DDX3X/SOX4/DDX39B/IMPACT/LARP4/HNRNPD/NCK1/THBS1/YTHDF2/SPHK2/RPS9/C1QBP/FXR2/PAIP1/CNBP	30
BP	GO:0061136	regulation of proteasomal protein catabolic process	33/1505	187/18723	1.43351e-05	0.00090603	0.000811736	CDK2/SUMO1/CAV1/RCHY1/CSNK1A1/ALAD/PSME2/SOCS4/RNFT1/TAF9/HSP90AB1/PSMD10/CAMLG/RPL11/OGT/USP5/RBX1/DESI1/RACK1/KEAP1/PIAS1/STYX/PSME1/ARIH1/XPO1/EIF3H/UBE2V2/UCHL5/DVL1/HSPBP1/SUMO2/HECTD1/NUDT15	33
BP	GO:0051783	regulation of nuclear division	27/1505	139/18723	1.43631e-05	0.00090603	0.000811736	BMP4/IGF1/DAPK3/PRMT5/BUB1B/NUSAP1/TPR/NEK2/CCNB1/MKI67/CAV2/CENPF/CUL7/KIF20B/ZWINT/LRP5/CDC16/CDK13/MAD2L1/INSR/PHIP/CDC42/OBSL1/CDT1/NUP62/CDC27/TRIP13	27
BP	GO:0009124	nucleoside monophosphate biosynthetic process	13/1505	42/18723	1.54838e-05	0.000965626	0.00086513	GART/ADSL/DUT/TYMS/ADK/RFK/IMPDH2/HPRT1/AMPD2/UCK2/APRT/TK1/PFAS	13
BP	GO:0006913	nucleocytoplasmic transport	46/1505	301/18723	1.78494e-05	0.00108842	0.000975139	BMP4/NMD3/SSB/SUMO1/NUP205/SDAD1/LTV1/ANGPT1/TARDBP/DHX9/TPR/ABCE1/TRIM28/RPL23/KPNA2/IPO11/SRSF3/HSP90AB1/RBM4/NOP9/NPM1/DDX39B/NDC1/FYTTD1/SMO/CPSF6/RANGAP1/DESI1/RPS15/STYX/THOC3/XPO1/IPO5/CSE1L/AGFG1/IPO7/PTPN11/HEATR3/NUP93/NUP62/KPNB1/TNPO1/IWS1/THOC7/APPL1/HNRNPA1	46
BP	GO:0051169	nuclear transport	46/1505	301/18723	1.78494e-05	0.00108842	0.000975139	BMP4/NMD3/SSB/SUMO1/NUP205/SDAD1/LTV1/ANGPT1/TARDBP/DHX9/TPR/ABCE1/TRIM28/RPL23/KPNA2/IPO11/SRSF3/HSP90AB1/RBM4/NOP9/NPM1/DDX39B/NDC1/FYTTD1/SMO/CPSF6/RANGAP1/DESI1/RPS15/STYX/THOC3/XPO1/IPO5/CSE1L/AGFG1/IPO7/PTPN11/HEATR3/NUP93/NUP62/KPNB1/TNPO1/IWS1/THOC7/APPL1/HNRNPA1	46
BP	GO:0007004	telomere maintenance via telomerase	17/1505	69/18723	2.36875e-05	0.00141854	0.00127091	CCT3/CCT2/GAR1/PINX1/TCP1/HNRNPC/NEK2/MAPKAPK5/CCT5/HSP90AB1/CCT6A/GNL3L/DKC1/CCT4/SRC/TEN1/HNRNPA1	17
BP	GO:0032392	DNA geometric change	20/1505	90/18723	2.42184e-05	0.00141854	0.00127091	RFC4/SMARCAD1/DHX9/TOP2A/MCM3/MCM7/DDX3X/WRN/MCM2/MCM5/XRCC6/CHD1/HMGB2/DDX1/CHD6/DSCC1/MCM4/CHD9/MCM6/CHD2	20
BP	GO:0009123	nucleoside monophosphate metabolic process	18/1505	76/18723	2.45556e-05	0.00141854	0.00127091	GART/ADSL/GDA/GMPR2/DUT/AK6/TYMS/ADK/RFK/IMPDH2/DTYMK/HPRT1/AMPD2/UCK2/APRT/TK1/NT5C/PFAS	18
BP	GO:0032543	mitochondrial translation	18/1505	76/18723	2.45556e-05	0.00141854	0.00127091	TRMT10C/MRPS35/MRPL51/RARS2/PTCD3/TRUB2/MTRF1/GATC/LARS2/CHCHD1/TUFM/NOA1/QRSL1/LRPPRC/IARS2/DARS2/SARS2/C1QBP	18
BP	GO:0071426	ribonucleoprotein complex export from nucleus	18/1505	76/18723	2.45556e-05	0.00141854	0.00127091	NMD3/SSB/SDAD1/LTV1/TPR/ABCE1/SRSF3/NOP9/NPM1/DDX39B/FYTTD1/RPS15/THOC3/XPO1/AGFG1/NUP93/IWS1/THOC7	18
BP	GO:0007080	mitotic metaphase plate congression	14/1505	50/18723	2.62658e-05	0.00150153	0.00134526	PSRC1/CDCA8/PINX1/PIBF1/RMDN1/CCNB1/KIF22/NUF2/KIFC1/EML3/CDT1/NUP62/KPNB1/BOD1	14
BP	GO:0032508	DNA duplex unwinding	19/1505	84/18723	2.95238e-05	0.00166132	0.00148842	RFC4/SMARCAD1/DHX9/TOP2A/MCM3/MCM7/DDX3X/WRN/MCM2/MCM5/XRCC6/CHD1/DDX1/CHD6/DSCC1/MCM4/CHD9/MCM6/CHD2	19
BP	GO:0071166	ribonucleoprotein complex localization	18/1505	77/18723	2.96665e-05	0.00166132	0.00148842	NMD3/SSB/SDAD1/LTV1/TPR/ABCE1/SRSF3/NOP9/NPM1/DDX39B/FYTTD1/RPS15/THOC3/XPO1/AGFG1/NUP93/IWS1/THOC7	18
BP	GO:0001824	blastocyst development	22/1505	106/18723	3.01619e-05	0.00166624	0.00149283	GABPA/NASP/IGF1/EMG1/COPS2/ZBED6/NEK2/WDR74/ASF1B/CNOT1/BYSL/TAF8/TET1/PHF6/NCAPG2/RRP7A/RTN4/RRM2/LPAR6/SMARCB1/RPL13/PTPN18	22
BP	GO:1901987	regulation of cell cycle phase transition	55/1505	390/18723	3.03615e-05	0.00166624	0.00149283	CDK2/ATF2/PTPN6/PINX1/PSME2/APEX1/BUB1B/MSH2/ID2/TPR/INTS7/PLRG1/CHEK2/RFWD3/RAD51C/SLFN11/CCNB1/CDC5L/PTEN/CENPF/NPM1/MEPCE/DDX3X/SOX4/DDX39B/ZWINT/MUS81/CCND1/CDC45/TFDP1/CDC16/TIPRL/RHNO1/BID/MAD2L1/APBB2/LSM11/PLPP2/BABAM1/TMOD3/PSME1/NACC2/RNASEH2B/RBL1/UBE2C/HINFP/METTL13/PTPN11/CDT1/RBL2/CDC27/TRIP13/TP53BP1/ATRIP/APPL1	55
BP	GO:1904872	regulation of telomerase RNA localization to Cajal body	8/1505	18/18723	3.59743e-05	0.00195472	0.00175129	CCT3/CCT2/TCP1/CCT5/SHQ1/CCT6A/DKC1/CCT4	8
BP	GO:0000966	RNA 5'-end processing	9/1505	23/18723	3.95905e-05	0.00209339	0.00187552	TRMT10C/SSB/THG1L/RPP38/POP5/POP7/HSD17B10/NOP9/PNPT1	9
BP	GO:0050657	nucleic acid transport	29/1505	163/18723	3.96706e-05	0.00209339	0.00187552	SSB/NUP205/TST/MAGOHB/CETN3/NUP43/SRSF7/DHX9/TPR/EIF4A3/SRSF3/PNPT1/NPM1/DDX39B/NDC1/FYTTD1/CPSF6/QKI/THOC3/LRPPRC/XPO1/AGFG1/AHCTF1/NUP93/NUP62/IWS1/THOC7/HNRNPA1/SRSF1	29
BP	GO:0050658	RNA transport	29/1505	163/18723	3.96706e-05	0.00209339	0.00187552	SSB/NUP205/TST/MAGOHB/CETN3/NUP43/SRSF7/DHX9/TPR/EIF4A3/SRSF3/PNPT1/NPM1/DDX39B/NDC1/FYTTD1/CPSF6/QKI/THOC3/LRPPRC/XPO1/AGFG1/AHCTF1/NUP93/NUP62/IWS1/THOC7/HNRNPA1/SRSF1	29
BP	GO:1902850	microtubule cytoskeleton organization involved in mitosis	27/1505	147/18723	4.06918e-05	0.00212682	0.00190548	ITGB1/PSRC1/RACGAP1/NUSAP1/PIBF1/TPX2/RMDN1/TPR/NEK2/CHEK2/DRG1/CENPH/CCNB1/KIF11/NUF2/KIFC1/EML3/GPSM2/SUN2/MAD2L1/TACC3/STMN1/SAPCD2/NUP62/KPNB1/FBXW11/LSM14A	27
BP	GO:0018205	peptidyl-lysine modification	53/1505	376/18723	4.25942e-05	0.00219545	0.00196696	SIRT1/ATF2/SUMO1/KDM1A/TADA1/CTH/TRIM28/SUZ12/TAF9/MORF4L2/EID1/MAP3K7/EPC2/OGT/SOX4/NAA50/SIRT5/PIAS2/ESCO1/UBE2I/EEF2KMT/TAF5L/KMT5B/TOLLIP/KDM6A/MSL3/GNL3L/ZZZ3/YEATS2/YEATS4/DESI1/BRD1/MBD3/NSD1/UHRF2/HINT2/SENP6/HDAC2/ATG5/KAT2B/PIAS1/SMARCB1/GCSH/SETD6/SPHK2/SUMO2/TADA2A/SENP3/MED24/MSL1/KANSL1/IWS1/MORF4L1	53
BP	GO:0006446	regulation of translational initiation	18/1505	79/18723	4.28049e-05	0.00219545	0.00196696	RPS6KB1/EIF2B5/EIF2S1/EIF3E/TPR/EIF3K/RBM4/NPM1/DDX3X/IMPACT/EIF4B/BANK1/NCK1/DDX1/YTHDF2/EIF3H/RPL13A/PAIP1	18
BP	GO:0043276	anoikis	11/1505	34/18723	4.40754e-05	0.00223969	0.00200659	ITGB1/CAV1/CHEK2/MAP3K7/TFDP1/ANKRD13C/MCL1/PIK3CA/SIK1/NTRK2/SRC	11
BP	GO:0034655	nucleobase-containing compound catabolic process	56/1505	407/18723	5.18278e-05	0.00260946	0.00233788	FXR1/SSB/FASTKD1/PUM1/SERBP1/LSM5/MAGOHB/DDX49/GDA/HNRNPC/APEX1/DUT/EIF3E/TARDBP/NMNAT1/RC3H1/DHX9/LSM6/METTL16/EIF4A3/PNPT1/CNOT1/NPM1/EXOG/RNPS1/DCTPP1/AGO1/CNOT7/PABPC4/RNH1/MUS81/RNASEH2C/HPRT1/DKC1/NUDT4/DERA/HNRNPD/HNRNPM/RNASEH1/SYNCRIP/LRPPRC/HNRNPR/REXO4/RNASEH2B/NUDT5/YTHDF2/XRN2/PDE7A/ACAT1/BTG2/NT5C/PRKCA/FXR2/NT5C3B/PAIP1/NUDT15	56
BP	GO:0050821	protein stabilization	32/1505	191/18723	5.53353e-05	0.00270938	0.0024274	SUMO1/PEX19/CCT3/RPL5/CCT2/IGF1/TCP1/CRYAB/CHEK2/RPL23/TAF9/CCT5/HSP90AB1/PTEN/CAMLG/NPM1/RPL11/VHL/SOX4/CCT6A/SMO/ATP1B3/RPS7/OTUD3/RTN4/CCT4/PARVA/DVL1/HSPD1/NAA15/PHB/CDK7	32
BP	GO:0051236	establishment of RNA localization	29/1505	166/18723	5.59926e-05	0.00270938	0.0024274	SSB/NUP205/TST/MAGOHB/CETN3/NUP43/SRSF7/DHX9/TPR/EIF4A3/SRSF3/PNPT1/NPM1/DDX39B/NDC1/FYTTD1/CPSF6/QKI/THOC3/LRPPRC/XPO1/AGFG1/AHCTF1/NUP93/NUP62/IWS1/THOC7/HNRNPA1/SRSF1	29
BP	GO:0009168	purine ribonucleoside monophosphate biosynthetic process	8/1505	19/18723	5.77619e-05	0.00270938	0.0024274	GART/ADSL/ADK/IMPDH2/HPRT1/AMPD2/APRT/PFAS	8
BP	GO:0051444	negative regulation of ubiquitin-protein transferase activity	8/1505	19/18723	5.77619e-05	0.00270938	0.0024274	RPL5/RPL23/RPS20/RPL11/DTX3L/MAD2L1/RPS15/RPS7	8
BP	GO:0090670	RNA localization to Cajal body	8/1505	19/18723	5.77619e-05	0.00270938	0.0024274	CCT3/CCT2/TCP1/CCT5/SHQ1/CCT6A/DKC1/CCT4	8
BP	GO:0090671	telomerase RNA localization to Cajal body	8/1505	19/18723	5.77619e-05	0.00270938	0.0024274	CCT3/CCT2/TCP1/CCT5/SHQ1/CCT6A/DKC1/CCT4	8
BP	GO:0090672	telomerase RNA localization	8/1505	19/18723	5.77619e-05	0.00270938	0.0024274	CCT3/CCT2/TCP1/CCT5/SHQ1/CCT6A/DKC1/CCT4	8
BP	GO:0090685	RNA localization to nucleus	8/1505	19/18723	5.77619e-05	0.00270938	0.0024274	CCT3/CCT2/TCP1/CCT5/SHQ1/CCT6A/DKC1/CCT4	8
BP	GO:2000209	regulation of anoikis	9/1505	24/18723	5.88383e-05	0.00273648	0.00245168	ITGB1/CAV1/CHEK2/ANKRD13C/MCL1/PIK3CA/SIK1/NTRK2/SRC	9
BP	GO:0009451	RNA modification	29/1505	167/18723	6.26496e-05	0.00288925	0.00258856	DIMT1/URM1/TRMT10C/QTRT2/SSB/METTL5/TYW3/METTL1/EMG1/GAR1/THG1L/MTO1/MTFMT/TRUB2/TFB2M/CMTR2/METTL16/FTSJ3/HSD17B10/LARP7/KTI12/RBM47/MEPCE/RNMT/TRUB1/DKC1/PUS7/TGS1/CTU2	29
BP	GO:0051054	positive regulation of DNA metabolic process	33/1505	201/18723	6.43855e-05	0.00294457	0.00263811	SIRT1/RFC4/CCT3/CCT2/TCP1/MSH2/PCNA/GRHL2/RPS3/DHX9/NEK2/MAPKAPK5/TRIM28/CCT5/HSP90AB1/PARP9/SMCHD1/DDX39B/CCT6A/WRN/KMT5B/DKC1/DTX3L/TFRC/HNRNPD/BABAM1/CCT4/ACTR2/SRC/DSCC1/UBE2V2/TP53BP1/HNRNPA1	33
BP	GO:0000209	protein polyubiquitination	37/1505	236/18723	6.60394e-05	0.00299524	0.00268351	ANAPC13/NMI/RNF115/FBXO38/KBTBD7/TRIM21/RC3H1/TRIM38/DDX3X/CDC16/DTX3L/CUL1/PPIA/RBX1/UBE2D3/RNF146/PELI2/RNF111/ARIH1/RMND5A/PELI1/RBCK1/UBE2C/UBE2V2/TRIP12/TRIM2/RNF166/AKTIP/CBFB/UBE2S/BLMH/GPS2/CDC27/FBXW11/HECTD1/UBE3A/RNF186	37
BP	GO:1904356	regulation of telomere maintenance via telomere lengthening	15/1505	61/18723	7.22587e-05	0.00324074	0.00290347	CCT3/CCT2/PINX1/TCP1/HNRNPC/NEK2/MAPKAPK5/CCT5/CCT6A/GNL3L/DKC1/CCT4/SRC/TEN1/HNRNPA1	15
BP	GO:0016573	histone acetylation	27/1505	152/18723	7.42282e-05	0.00324074	0.00290347	SIRT1/ATF2/TADA1/TAF9/MORF4L2/EID1/MAP3K7/EPC2/OGT/NAA50/TAF5L/MSL3/ZZZ3/YEATS2/YEATS4/BRD1/MBD3/ATG5/KAT2B/SMARCB1/SPHK2/TADA2A/MED24/MSL1/KANSL1/IWS1/MORF4L1	27
BP	GO:2000059	negative regulation of ubiquitin-dependent protein catabolic process	13/1505	48/18723	7.42591e-05	0.00324074	0.00290347	RPL5/RPL23/TAF9/HSP90AB1/CAMLG/RPL11/OGT/RPS7/STYX/CSNK2A1/EIF3H/UCHL5/CSNK2A2	13
BP	GO:0006278	RNA-dependent DNA biosynthetic process	17/1505	75/18723	7.42766e-05	0.00324074	0.00290347	CCT3/CCT2/GAR1/PINX1/TCP1/HNRNPC/NEK2/MAPKAPK5/CCT5/HSP90AB1/CCT6A/GNL3L/DKC1/CCT4/SRC/TEN1/HNRNPA1	17
BP	GO:0032868	response to insulin	40/1505	264/18723	7.44048e-05	0.00324074	0.00290347	RPS6KB1/MSTN/RAB8A/SIRT1/PIK3R3/HADHA/CAT/HSD11B2/PTEN/STXBP3/CAV2/OGT/EEF2K/BAIAP2L1/ESRRA/PAK1/PIK3CA/USO1/NCK1/INSR/SLC27A1/DENND4C/KANK1/PHIP/KAT2B/KL/SRC/SRSF6/NCOA5/GGH/SESN3/SLC25A33/TLR2/PTPN11/STAT1/APRT/BAIAP2/HDAC5/SCAP/APPL1	40
BP	GO:0044772	mitotic cell cycle phase transition	57/1505	424/18723	8.52458e-05	0.00368369	0.00330032	CDK2/RPS6KB1/ITGB1/RPL24/CDKN2C/NASP/PTPN6/PINX1/CKS2/PSME2/APEX1/BUB1B/CCNB2/CALM2/ID2/CUL5/TPR/PLRG1/CHEK2/RFWD3/RAD51C/SLFN11/CCNB1/PTEN/CENPF/PPM1D/MEPCE/DDX3X/SOX4/ZWINT/CCND1/TFDP1/CDC16/CUL1/BID/MAD2L1/EIF4E/TACC3/CCNG1/LSM11/DNM2/BABAM1/TPD52L1/PIAS1/TMOD3/PSME1/NACC2/RNASEH2B/RBL1/UBE2C/HINFP/CDT1/RBL2/UBE2S/CDC27/TRIP13/APPL1	57
BP	GO:0006188	IMP biosynthetic process	6/1505	11/18723	8.66321e-05	0.00371435	0.00332778	GART/ADSL/HPRT1/AMPD2/APRT/PFAS	6
BP	GO:0051168	nuclear export	27/1505	154/18723	9.34728e-05	0.00395578	0.00354409	NMD3/SSB/SDAD1/LTV1/DHX9/TPR/ABCE1/SRSF3/NOP9/NPM1/DDX39B/FYTTD1/CPSF6/RANGAP1/DESI1/RPS15/STYX/THOC3/XPO1/CSE1L/AGFG1/PTPN11/NUP93/NUP62/IWS1/THOC7/HNRNPA1	27
BP	GO:0000959	mitochondrial RNA metabolic process	13/1505	49/18723	9.37047e-05	0.00395578	0.00354409	TRMT10C/FASTKD1/MTO1/TFB2M/MRPL12/HSD17B10/PNPT1/MTERF4/FOXO3/LRPPRC/SLC25A33/DARS2/SARS2	13
BP	GO:0042542	response to hydrogen peroxide	26/1505	146/18723	9.58218e-05	0.00401427	0.00359649	SIRT1/EEF2/APEX1/PCNA/CRYAB/RPS3/CAT/PRDX3/RIPK1/IMPACT/TRAP1/PLEKHA1/PPIF/ETS1/STK26/PAWR/RACK1/FXN/HDAC2/FOXO3/SRC/PTPN11/HSPD1/STAT1/COL1A1/UBE3A	26
BP	GO:0051028	mRNA transport	24/1505	130/18723	9.80538e-05	0.00407666	0.00365239	NUP205/MAGOHB/CETN3/NUP43/SRSF7/DHX9/TPR/EIF4A3/SRSF3/DDX39B/NDC1/FYTTD1/QKI/THOC3/LRPPRC/XPO1/AGFG1/AHCTF1/NUP93/NUP62/IWS1/THOC7/HNRNPA1/SRSF1	24
BP	GO:0000462	maturation of SSU-rRNA from tricistronic rRNA transcript (SSU-rRNA, 5.8S rRNA, LSU-rRNA)	11/1505	37/18723	0.000105206	0.00431265	0.00386382	RPS8/RPS14/RPS21/RPS19/NOP9/WDR46/BYSL/HEATR1/PWP2/UTP4/RPS16	11
BP	GO:0000380	alternative mRNA splicing, via spliceosome	17/1505	77/18723	0.000105302	0.00431265	0.00386382	FXR1/MBNL1/KDM1A/RBM25/DHX9/RBM5/RBM4/RNPS1/SFPQ/PUF60/CDK13/STRAP/HNRNPM/SRSF6/FXR2/HNRNPA1/SRSF1	17
BP	GO:0000723	telomere maintenance	24/1505	131/18723	0.000111054	0.00446836	0.00400332	CCT3/CCT2/GAR1/PINX1/TCP1/HNRNPC/APEX1/PCNA/NEK2/MAPKAPK5/RAD51C/CCT5/HSP90AB1/CCT6A/WRN/GNL3L/DKC1/XRCC6/HNRNPD/CCT4/SRC/TEN1/RAD51D/HNRNPA1	24
BP	GO:0006401	RNA catabolic process	41/1505	278/18723	0.00011213	0.00446836	0.00400332	FXR1/SSB/FASTKD1/PUM1/SERBP1/LSM5/MAGOHB/DDX49/HNRNPC/APEX1/EIF3E/TARDBP/RC3H1/DHX9/LSM6/METTL16/EIF4A3/PNPT1/CNOT1/NPM1/RNPS1/AGO1/CNOT7/PABPC4/RNH1/RNASEH2C/DKC1/HNRNPD/HNRNPM/RNASEH1/SYNCRIP/LRPPRC/HNRNPR/RNASEH2B/YTHDF2/XRN2/BTG2/PRKCA/FXR2/NT5C3B/PAIP1	41
BP	GO:0051656	establishment of organelle localization	53/1505	390/18723	0.000112574	0.00446836	0.00400332	ITGB1/TBC1D23/NMD3/BBS5/MREG/PSRC1/CDCA8/SDAD1/PINX1/LTV1/NUSAP1/PIBF1/RMDN1/ABCE1/GOSR1/CCNB1/KIF22/AP3M1/NOP9/CENPF/NPM1/NUF2/KIFC1/DTNBP1/MYO5B/MLPH/EML3/ARMCX3/GPSM2/SUN2/MAD2L1/AP1AR/RPS15/DNM2/RAB27A/LRPPRC/CDC42/XPO1/ACTR2/SAPCD2/MKKS/ARFGAP2/MYO1B/CDT1/SPHK2/NUP62/RHOT1/KPNB1/FBXW11/PDCD6/BOD1/CLMN/FYCO1	53
BP	GO:2001242	regulation of intrinsic apoptotic signaling pathway	28/1505	164/18723	0.000112704	0.00446836	0.00400332	SIRT1/KDM1A/CAV1/RPS3/URI1/TAF9/HELLS/NONO/RPL11/DDX3X/TRAP1/SFPQ/PPIF/MCL1/PPIA/TMBIM6/DNM1L/BID/RACK1/NCK1/HNRNPK/DNAJA1/RPS7/NACC2/SRC/PTPMT1/ENO1/PLEKHF1	28
BP	GO:0006302	double-strand break repair	38/1505	251/18723	0.000113175	0.00446836	0.00400332	KDM1A/SMARCAD1/MSH2/CHEK2/RFWD3/RAD51C/MCM3/MCM7/SFR1/PARP9/SMCHD1/RNF138/NSMCE1/SFPQ/WRN/MUS81/KMT5B/MCM2/CDC45/DTX3L/MCM5/RAD52/XRCC6/BABAM1/HMGB2/TDP1/ACTR2/DDX1/UBE2V2/MCM4/TRIP12/TONSL/MCM6/RAD51D/TRIP13/TP53BP1/YY1/MORF4L1	38
BP	GO:0030490	maturation of SSU-rRNA	13/1505	50/18723	0.000117399	0.00460206	0.00412311	RPS8/RPS14/RPS21/LSM6/RPS19/NOP9/WDR46/BYSL/HEATR1/PWP2/UTP4/RPS16/DDX52	13
BP	GO:0043543	protein acylation	37/1505	243/18723	0.000122806	0.00474343	0.00424976	SIRT1/ATF2/TADA1/TAF9/MORF4L2/EID1/MAP3K7/FAM161A/EPC2/OGT/DDX3X/SOX4/NAA50/ESCO1/TAF5L/MSL3/ZZZ3/YEATS2/YEATS4/BRD1/MBD3/HINT2/HDAC2/ATG5/KAT2B/NAA30/DSCC1/HHAT/SMARCB1/NAA15/SPHK2/TADA2A/MED24/MSL1/KANSL1/IWS1/MORF4L1	37
BP	GO:0043414	macromolecule methylation	45/1505	316/18723	0.000123204	0.00474343	0.00424976	DIMT1/BTG1/SIRT1/TRMT10C/METTL5/KDM1A/TYW3/METTL1/EMG1/MTO1/PRMT5/NTMT1/GRHL2/TFB2M/PRMT7/CMTR2/TRIM28/SUZ12/METTL16/FTSJ3/MTRR/HELLS/HSD17B10/LARP7/PPM1D/MEPCE/OGT/RNMT/EEF2KMT/TET1/KMT5B/PRMT3/KDM6A/PAXBP1/PIK3CA/MBD3/NSD1/DNMT3A/SNRPB/TGS1/BTG2/ICMT/SMARCB1/SETD6/IWS1	45
BP	GO:0000725	recombinational repair	25/1505	140/18723	0.000123711	0.00474343	0.00424976	KDM1A/RFWD3/RAD51C/MCM3/MCM7/SFR1/SMCHD1/RNF138/NSMCE1/SFPQ/WRN/MUS81/MCM2/CDC45/MCM5/RHNO1/RAD52/ACTR2/MCM4/TONSL/MCM6/RAD51D/TP53BP1/YY1/MORF4L1	25
BP	GO:0031123	RNA 3'-end processing	22/1505	116/18723	0.000125119	0.00474343	0.00424976	TRMT10C/WDR33/SSB/FIP1L1/PAPOLG/RPS21/CSTF1/CSTF3/INTS7/NUDT21/INTS2/CCNB1/PCF11/HSD17B10/LARP7/PNPT1/CPSF4/DKC1/INTS1/CPSF6/LSM11/SYMPK	22
BP	GO:0070200	establishment of protein localization to telomere	7/1505	16/18723	0.000127812	0.00474343	0.00424976	CCT3/CCT2/TCP1/CCT5/CCT6A/DKC1/CCT4	7
BP	GO:0099116	tRNA 5'-end processing	7/1505	16/18723	0.000127812	0.00474343	0.00424976	TRMT10C/SSB/THG1L/RPP38/POP5/POP7/HSD17B10	7
BP	GO:1902570	protein localization to nucleolus	7/1505	16/18723	0.000127812	0.00474343	0.00424976	NMD3/PINX1/RPF2/NPM1/BYSL/WRN/POLR1A	7
BP	GO:0031647	regulation of protein stability	43/1505	298/18723	0.00012792	0.00474343	0.00424976	CD81/HSPA8/SIRT1/SUMO1/PEX19/CCT3/RPL5/CCT2/IGF1/PINX1/TCP1/CRYAB/TRIM21/TARDBP/CHEK2/RPL23/TAF9/CCT5/HSP90AB1/PTEN/CAMLG/NPM1/RPL11/RNF128/VHL/SOX4/CCT6A/GNL3L/SMO/ATP1B3/RPS7/QRSL1/OTUD3/RTN4/CCT4/SRC/PARVA/DVL1/HSPD1/NAA15/PHB/FBXW11/CDK7	43
BP	GO:0009127	purine nucleoside monophosphate biosynthetic process	8/1505	21/18723	0.000134415	0.00491779	0.00440597	GART/ADSL/ADK/IMPDH2/HPRT1/AMPD2/APRT/PFAS	8
BP	GO:0034471	ncRNA 5'-end processing	8/1505	21/18723	0.000134415	0.00491779	0.00440597	TRMT10C/SSB/THG1L/RPP38/POP5/POP7/HSD17B10/NOP9	8
BP	GO:0018393	internal peptidyl-lysine acetylation	27/1505	158/18723	0.000145854	0.00530097	0.00474928	SIRT1/ATF2/TADA1/TAF9/MORF4L2/EID1/MAP3K7/EPC2/OGT/NAA50/TAF5L/MSL3/ZZZ3/YEATS2/YEATS4/BRD1/MBD3/ATG5/KAT2B/SMARCB1/SPHK2/TADA2A/MED24/MSL1/KANSL1/IWS1/MORF4L1	27
BP	GO:0007051	spindle organization	30/1505	184/18723	0.000154019	0.0055609	0.00498215	TUBGCP5/PSRC1/RACGAP1/HAUS4/CCNB2/NTMT1/PIBF1/TPX2/RMDN1/RPS3/TPR/NEK2/CHEK2/DRG1/CENPH/CCNB1/KIF11/NUF2/KIFC1/EML3/GPSM2/SUN2/TACC3/SENP6/STMN1/MAPRE1/NUP62/NCOR1/KPNB1/LSM14A	30
BP	GO:0051310	metaphase plate congression	15/1505	65/18723	0.000156559	0.00561564	0.0050312	PSRC1/CDCA8/PINX1/PIBF1/RMDN1/CCNB1/KIF22/CENPF/NUF2/KIFC1/EML3/CDT1/NUP62/KPNB1/BOD1	15
BP	GO:0010639	negative regulation of organelle organization	48/1505	348/18723	0.000162854	0.00580352	0.00519952	BMP4/IGF1/PTTG1/PINX1/HNRNPC/BUB1B/TPX2/TPR/TOP2A/CCNB1/PSMD10/CENPF/NPM1/TBC1D7/CARMIL1/ARHGAP28/ZWINT/PPIF/SSH3/ARHGAP6/GNL3L/MCM2/KANK4/TFRC/CAPZA2/PIK3CA/TWF1/DNM1L/MAD2L1/ADD1/DNM2/KANK1/FXN/KAT2B/GMFB/TMOD3/CGNL1/STMN1/CKAP2/MKKS/MAPRE1/SRC/CDT1/RHPN2/TEN1/TRIP13/HNRNPA1/ARFGEF1	48
BP	GO:1901293	nucleoside phosphate biosynthetic process	38/1505	256/18723	0.000171592	0.00607545	0.00544316	ELOVL6/GART/ATP6V1A/ADSL/SLC26A2/DUT/NMNAT1/ACLY/AK6/TYMS/ADK/PARP9/RFK/IMPDH2/SLC25A16/SLC35B2/DTYMK/NME3/PAPSS2/PANK1/PPCS/HPRT1/AMPD2/UCK2/RRM2/NAXD/PANK2/ACAT1/NME7/ENO1/APRT/SPHK2/TK1/ACACA/PFAS/PRPSAP2/NADK2/CTPS1	38
BP	GO:0032869	cellular response to insulin stimulus	32/1505	203/18723	0.000179985	0.00629977	0.00564413	RPS6KB1/MSTN/RAB8A/SIRT1/PIK3R3/PTEN/CAV2/OGT/EEF2K/BAIAP2L1/ESRRA/PAK1/PIK3CA/USO1/NCK1/INSR/SLC27A1/DENND4C/KANK1/PHIP/KAT2B/KL/SRC/NCOA5/SESN3/SLC25A33/PTPN11/STAT1/APRT/BAIAP2/HDAC5/APPL1	32
BP	GO:0006475	internal protein amino acid acetylation	27/1505	160/18723	0.000180787	0.00629977	0.00564413	SIRT1/ATF2/TADA1/TAF9/MORF4L2/EID1/MAP3K7/EPC2/OGT/NAA50/TAF5L/MSL3/ZZZ3/YEATS2/YEATS4/BRD1/MBD3/ATG5/KAT2B/SMARCB1/SPHK2/TADA2A/MED24/MSL1/KANSL1/IWS1/MORF4L1	27
BP	GO:0009156	ribonucleoside monophosphate biosynthetic process	10/1505	33/18723	0.000181371	0.00629977	0.00564413	GART/ADSL/ADK/RFK/IMPDH2/HPRT1/AMPD2/UCK2/APRT/PFAS	10
BP	GO:0006457	protein folding	33/1505	212/18723	0.00018331	0.00632707	0.00566859	FKBP8/HSPA8/HSPE1/HSPA6/PEX19/CCT3/PFDN5/CCT2/WDR83OS/TCP1/CRYAB/DNAJC7/CCT5/UNC45A/TBCC/HSP90AB1/TRAP1/CCT6A/PPIF/PPIA/TTC1/PPIC/DNAJA1/CCT4/HSPH1/MKKS/CSNK2A1/PDRG1/HSPD1/PPID/HSPBP1/DNAJC10/CHCHD4	33
BP	GO:0000075	cell cycle checkpoint	28/1505	169/18723	0.000190835	0.00654565	0.00586442	CDK2/ATF2/BUB1B/MSH2/TPR/INTS7/CHEK2/RFWD3/CCNB1/CDC5L/CENPF/SOX4/DDX39B/ZWINT/MUS81/CCND1/CDC45/TIPRL/RHNO1/MAD2L1/BABAM1/RNASEH2B/HINFP/PTPN11/CDT1/TRIP13/TP53BP1/ATRIP	28
BP	GO:0032069	regulation of nuclease activity	8/1505	22/18723	0.000196397	0.00669457	0.00599784	SIRT1/PCNA/RPS3/ABCE1/NPM1/TMBIM6/HMGB2/TCEA1	8
BP	GO:0051304	chromosome separation	19/1505	96/18723	0.000198691	0.00673096	0.00603044	SMARCAD1/PTTG1/BUB1B/TPR/TOP2A/CCNB1/CENPF/ZWINT/TOP2B/MUS81/CDC16/MAD2L1/TACC3/CSNK2A1/UBE2C/CDT1/CSNK2A2/CDC27/TRIP13	19
BP	GO:0010833	telomere maintenance via telomere lengthening	17/1505	81/18723	0.000202866	0.00683022	0.00611938	CCT3/CCT2/GAR1/PINX1/TCP1/HNRNPC/NEK2/MAPKAPK5/CCT5/HSP90AB1/CCT6A/GNL3L/DKC1/CCT4/SRC/TEN1/HNRNPA1	17
BP	GO:0007052	mitotic spindle organization	22/1505	120/18723	0.000208639	0.00698176	0.00625514	PSRC1/RACGAP1/PIBF1/TPX2/RMDN1/TPR/NEK2/CHEK2/DRG1/CENPH/CCNB1/KIF11/NUF2/KIFC1/EML3/GPSM2/SUN2/TACC3/STMN1/NUP62/KPNB1/LSM14A	22
BP	GO:0006310	DNA recombination	43/1505	305/18723	0.000215647	0.00717256	0.00642609	KDM1A/SMARCAD1/APEX1/MSH2/RFWD3/RAD51C/TOP2A/PSMC3IP/KPNA2/MCM3/MCM7/SFR1/NONO/NSMCE3/SMCHD1/RNF138/NSMCE1/SFPQ/TOP2B/WRN/MUS81/KMT5B/MCM2/CDC45/TFRC/MCM5/RHNO1/RAD52/XRCC6/HMGB2/MSH6/ACTR2/KIN/MCM4/TONSL/UCHL5/HSPD1/MCM6/RAD51D/TRIP13/TP53BP1/YY1/MORF4L1	43
BP	GO:0006402	mRNA catabolic process	35/1505	232/18723	0.000221725	0.00733027	0.00656738	FXR1/SSB/FASTKD1/PUM1/SERBP1/LSM5/MAGOHB/HNRNPC/APEX1/EIF3E/TARDBP/RC3H1/DHX9/LSM6/METTL16/EIF4A3/PNPT1/CNOT1/NPM1/RNPS1/AGO1/CNOT7/PABPC4/RNH1/HNRNPD/HNRNPM/SYNCRIP/HNRNPR/YTHDF2/XRN2/BTG2/PRKCA/FXR2/NT5C3B/PAIP1	35
BP	GO:0006270	DNA replication initiation	10/1505	34/18723	0.000238577	0.00779353	0.00698242	MCM3/MCM7/LRWD1/MCM2/CDC45/MCM5/MCM4/CDT1/MCM6/ORC4	10
BP	GO:0032212	positive regulation of telomere maintenance via telomerase	10/1505	34/18723	0.000238577	0.00779353	0.00698242	CCT3/CCT2/TCP1/NEK2/MAPKAPK5/CCT5/CCT6A/DKC1/CCT4/HNRNPA1	10
BP	GO:0044270	cellular nitrogen compound catabolic process	58/1505	451/18723	0.000246553	0.0080064	0.00717314	FXR1/SSB/FASTKD1/PUM1/SERBP1/LSM5/TST/MAGOHB/DDX49/GDA/HNRNPC/APEX1/DUT/EIF3E/TARDBP/NMNAT1/RC3H1/DHX9/LSM6/METTL16/EIF4A3/PNPT1/CNOT1/NPM1/EXOG/RNPS1/DCTPP1/AGO1/CNOT7/PABPC4/TET1/RNH1/MUS81/RNASEH2C/HPRT1/DKC1/NUDT4/DERA/HNRNPD/HNRNPM/RNASEH1/SYNCRIP/LRPPRC/HNRNPR/REXO4/RNASEH2B/NUDT5/YTHDF2/XRN2/PDE7A/ACAT1/BTG2/NT5C/PRKCA/FXR2/NT5C3B/PAIP1/NUDT15	58
BP	GO:0032259	methylation	49/1505	364/18723	0.000251678	0.00812475	0.00727918	DIMT1/BTG1/SIRT1/TRMT10C/METTL5/KDM1A/DPH5/TYW3/METTL1/EMG1/MTO1/PRMT5/NTMT1/GRHL2/TFB2M/PRMT7/CMTR2/TRIM28/SUZ12/METTL16/FTSJ3/MTRR/TYMS/HELLS/HSD17B10/LARP7/PPM1D/MEPCE/OGT/RNMT/EEF2KMT/TET1/KMT5B/PRMT3/KDM6A/PAXBP1/PIK3CA/MBD3/NSD1/CARNMT1/DNMT3A/SNRPB/TGS1/BTG2/METTL13/ICMT/SMARCB1/SETD6/IWS1	49
BP	GO:0000724	double-strand break repair via homologous recombination	24/1505	138/18723	0.000253664	0.008141	0.00729373	KDM1A/RFWD3/RAD51C/MCM3/MCM7/SFR1/SMCHD1/RNF138/NSMCE1/SFPQ/WRN/MUS81/MCM2/CDC45/MCM5/RAD52/ACTR2/MCM4/TONSL/MCM6/RAD51D/TP53BP1/YY1/MORF4L1	24
BP	GO:0051972	regulation of telomerase activity	12/1505	47/18723	0.000256684	0.00819	0.00733764	CCT2/PINX1/TCP1/GRHL2/NEK2/MAPKAPK5/HSP90AB1/DKC1/HNRNPD/CCT4/SRC/TEN1	12
BP	GO:1904029	regulation of cyclin-dependent protein kinase activity	19/1505	98/18723	0.00026275	0.0083351	0.00746763	ACTB/CKS1B/PSRC1/CDKN2C/CKS2/CCNB2/SERTAD1/CCNB1/HSP90AB1/PTEN/PSMD10/CCND1/CCNG1/KAT2B/IPO5/SRC/IPO7/CCNT2/CDK7	19
BP	GO:2001233	regulation of apoptotic signaling pathway	48/1505	356/18723	0.000278912	0.00875078	0.00784005	BMP4/SIRT1/KDM1A/CTH/CAV1/IGF1/DAPK3/RPS3/URI1/TAF9/PTEN/HELLS/PSMD10/NONO/RPL11/DDX3X/RIPK1/TRAP1/MAZ/TRAF7/SFPQ/PPIF/MCL1/PPIA/TMBIM6/DNM1L/BID/RACK1/NCK1/HNRNPK/HMGB2/FXN/DNAJA1/RPS7/PHIP/TPD52L1/THBS1/BIRC6/NACC2/ZMYND11/CSNK2A1/RBCK1/SRC/PTPMT1/PPP2R1B/ENO1/CSNK2A2/PLEKHF1	48
BP	GO:0016570	histone modification	59/1505	463/18723	0.000279043	0.00875078	0.00784005	CDK2/SIRT1/ATF2/KDM1A/TADA1/MIER1/USP15/SMARCAD1/PRMT5/NTMT1/PRMT7/SUZ12/TAF9/CCNB1/MORF4L2/EID1/USP16/MAP3K7/EPC2/PCGF6/OGT/NAA50/SFPQ/PCGF5/MAPK8/TET1/TAF5L/KMT5B/KDM6A/MSL3/ZZZ3/DTX3L/NCAPG2/PAXBP1/YEATS2/TBL1XR1/YEATS4/BRD1/MBD3/NSD1/UHRF1/HDAC2/ATG5/KAT2B/JDP2/TRIP12/SMARCB1/SETD6/SPHK2/PRKCA/TADA2A/PHB/MED24/MSL1/HDAC5/KANSL1/IWS1/MORF4L1/VRK1	59
BP	GO:0009167	purine ribonucleoside monophosphate metabolic process	11/1505	41/18723	0.000288322	0.00899039	0.00805473	GART/ADSL/GDA/GMPR2/ADK/IMPDH2/HPRT1/AMPD2/APRT/NT5C/PFAS	11
BP	GO:0009165	nucleotide biosynthetic process	37/1505	254/18723	0.000303181	0.00939146	0.00841405	ELOVL6/GART/ATP6V1A/ADSL/SLC26A2/DUT/NMNAT1/ACLY/AK6/TYMS/ADK/PARP9/RFK/IMPDH2/SLC25A16/SLC35B2/DTYMK/NME3/PAPSS2/PANK1/PPCS/HPRT1/AMPD2/UCK2/RRM2/NAXD/PANK2/ACAT1/NME7/ENO1/APRT/SPHK2/ACACA/PFAS/PRPSAP2/NADK2/CTPS1	37
BP	GO:0031532	actin cytoskeleton reorganization	20/1505	107/18723	0.000305052	0.00939146	0.00841405	DAPK3/RAP2A/PTK7/DTNBP1/BAIAP2L1/CLDN3/MCU/CDC42BPG/PAK1/MKLN1/PDLIM4/ATP2C1/CXADR/PLEK2/EFS/CDC42/PARVA/BAIAP2/ARHGDIA/CDC42BPB	20
BP	GO:0046700	heterocycle catabolic process	57/1505	445/18723	0.00030777	0.00939146	0.00841405	FXR1/SSB/FASTKD1/PUM1/SERBP1/LSM5/MAGOHB/DDX49/GDA/HNRNPC/APEX1/DUT/EIF3E/TARDBP/NMNAT1/RC3H1/DHX9/LSM6/METTL16/EIF4A3/PNPT1/CNOT1/NPM1/EXOG/RNPS1/DCTPP1/AGO1/CNOT7/PABPC4/TET1/RNH1/MUS81/RNASEH2C/HPRT1/DKC1/NUDT4/DERA/HNRNPD/HNRNPM/RNASEH1/SYNCRIP/LRPPRC/HNRNPR/REXO4/RNASEH2B/NUDT5/YTHDF2/XRN2/PDE7A/ACAT1/BTG2/NT5C/PRKCA/FXR2/NT5C3B/PAIP1/NUDT15	57
BP	GO:0046040	IMP metabolic process	7/1505	18/18723	0.000308029	0.00939146	0.00841405	GART/ADSL/HPRT1/AMPD2/APRT/NT5C/PFAS	7
BP	GO:0097421	liver regeneration	10/1505	35/18723	0.000310154	0.00940402	0.00842531	PRMT5/PCNA/RPL19/TYMS/PNPT1/CCND1/RPS15/CSNK2A2/RPS16/SRSF1	10
BP	GO:0070198	protein localization to chromosome, telomeric region	9/1505	29/18723	0.000311933	0.00940597	0.00842705	CCT3/CCT2/PINX1/TCP1/CCT5/CCT6A/GNL3L/DKC1/CCT4	9
BP	GO:0010948	negative regulation of cell cycle process	41/1505	294/18723	0.000375778	0.0112692	0.0100964	CDK2/BMP4/ATF2/PTTG1/PINX1/BUB1B/MSH2/TPR/INTS7/NEK2/CHEK2/RFWD3/SLFN11/CCNB1/CDC5L/PTEN/CENPF/NPM1/SOX4/DDX39B/ZWINT/MUS81/CCND1/CDC45/TIPRL/RHNO1/MAD2L1/APBB2/BABAM1/KAT2B/NACC2/RNASEH2B/RBL1/HINFP/METTL13/PTPN11/CDT1/RBL2/TRIP13/TP53BP1/ATRIP	41
BP	GO:1901796	regulation of signal transduction by p53 class mediator	18/1505	93/18723	0.000385659	0.0115027	0.0103056	SIRT1/KDM1A/RPL5/RPF2/PRMT5/MAPKAPK5/CHEK2/RPL23/TAF9/PSMD10/RPS20/NPM1/RPL11/RPS15/HNRNPK/RPS7/SPRED1/BOP1	18
BP	GO:0006261	DNA-dependent DNA replication	25/1505	151/18723	0.00041517	0.012316	0.0110342	RFC4/PRIM1/POLE2/MGME1/PCNA/RFWD3/SLFN11/MCM3/MCM7/DDX21/LRWD1/MCMBP/WRN/MCM2/CDC45/POLD2/DDX23/MCM5/DSCC1/MCM4/TONSL/CDT1/MCM6/ORC4/POLD1	25
BP	GO:1901988	negative regulation of cell cycle phase transition	36/1505	249/18723	0.000419895	0.0123892	0.0110998	CDK2/ATF2/PINX1/BUB1B/MSH2/TPR/INTS7/CHEK2/RFWD3/SLFN11/CCNB1/CDC5L/PTEN/CENPF/SOX4/DDX39B/ZWINT/MUS81/CCND1/CDC45/TIPRL/RHNO1/MAD2L1/APBB2/BABAM1/NACC2/RNASEH2B/RBL1/HINFP/METTL13/PTPN11/CDT1/RBL2/TRIP13/TP53BP1/ATRIP	36
BP	GO:2001251	negative regulation of chromosome organization	17/1505	86/18723	0.000428652	0.0125799	0.0112707	PTTG1/PINX1/HNRNPC/BUB1B/TPR/TOP2A/CCNB1/CENPF/ZWINT/GNL3L/MCM2/MAD2L1/SRC/CDT1/TEN1/TRIP13/HNRNPA1	17
BP	GO:0000302	response to reactive oxygen species	33/1505	222/18723	0.000433668	0.0125862	0.0112763	SIRT1/EEF2/APEX1/PCNA/CRYAB/RPS3/CAT/PRDX3/PRDX5/RIPK1/IMPACT/TRAP1/CHUK/PLEKHA1/PPIF/MAPK8/ETS1/STK26/PAWR/RBX1/RACK1/FXN/HDAC2/FOXO3/TPM1/SRC/SESN3/PTPN11/HSPD1/STAT1/COL1A1/UBE3A/NUDT15	33
BP	GO:0015931	nucleobase-containing compound transport	33/1505	222/18723	0.000433668	0.0125862	0.0112763	SSB/NUP205/TST/MAGOHB/CETN3/NUP43/SRSF7/DHX9/TPR/EIF4A3/SRSF3/SLC28A3/PNPT1/NPM1/SLC35B2/RIPK1/DDX39B/NDC1/FYTTD1/CPSF6/QKI/THOC3/LRPPRC/XPO1/AGFG1/AHCTF1/SLC25A33/NUP93/NUP62/IWS1/THOC7/HNRNPA1/SRSF1	33
BP	GO:0051348	negative regulation of transferase activity	38/1505	268/18723	0.000435747	0.0125862	0.0112763	BMP4/MSTN/SIRT1/RPL5/CDKN2C/CAV1/PTPN6/PINX1/SOCS4/RGS2/PPP2R5A/RPL23/PTEN/PRDX3/RPS20/NPM1/RPL11/DTNBP1/LRP5/DTX3L/NCAPG2/PPIA/MAD2L1/RPS15/RACK1/DNAJA1/RPS7/KAT2B/SPRED1/IPO5/ZGPAT/SRC/IPO7/DVL1/NUP62/TEN1/ORMDL3/SNX6	38
BP	GO:0000079	regulation of cyclin-dependent protein serine/threonine kinase activity	18/1505	94/18723	0.00044177	0.0126934	0.0113723	ACTB/CKS1B/PSRC1/CDKN2C/CKS2/CCNB2/SERTAD1/CCNB1/PTEN/PSMD10/CCND1/CCNG1/KAT2B/IPO5/SRC/IPO7/CCNT2/CDK7	18
BP	GO:0006999	nuclear pore organization	6/1505	14/18723	0.000455853	0.0130298	0.0116737	NUP205/TPR/NDC1/RTN4/AHCTF1/NUP93	6
BP	GO:1903051	negative regulation of proteolysis involved in cellular protein catabolic process	14/1505	64/18723	0.000462707	0.0131572	0.0117879	RPL5/ALAD/RPL23/TAF9/HSP90AB1/CAMLG/RPL11/OGT/RPS7/STYX/CSNK2A1/EIF3H/UCHL5/CSNK2A2	14
BP	GO:0008033	tRNA processing	22/1505	127/18723	0.000476336	0.0134749	0.0120725	URM1/TRMT10C/QTRT2/SSB/ZBTB8OS/TYW3/METTL1/RTCB/THG1L/MTO1/MTFMT/RPP38/LSM6/POP5/POP7/HSD17B10/KTI12/TRUB1/PUS7/DDX1/CTU2/TSEN34	22
BP	GO:0006260	DNA replication	37/1505	260/18723	0.000479709	0.0135007	0.0120956	CDK2/RFC4/NASP/PRIM1/POLE2/DUT/CCDC88A/MGME1/PCNA/DHX9/RFWD3/SLFN11/MCM3/MCM7/DDX21/ESCO1/LRWD1/MCMBP/WRN/MCM2/CDC45/POLD2/NAP1L1/DDX23/MCM5/CDC42/RRM2/KIN/DTD1/DSCC1/MCM4/TONSL/CDT1/MCM6/ORC4/GRWD1/POLD1	37
BP	GO:0043487	regulation of RNA stability	27/1505	170/18723	0.000492194	0.0137814	0.0123471	FXR1/FASTKD1/PUM1/SERBP1/DDX49/HNRNPC/APEX1/TARDBP/RC3H1/DHX9/METTL16/PNPT1/CNOT1/NPM1/CNOT7/PABPC4/DKC1/HNRNPD/HNRNPM/SYNCRIP/HNRNPR/YTHDF2/BTG2/PRKCA/FXR2/NT5C3B/PAIP1	27
BP	GO:1904358	positive regulation of telomere maintenance via telomere lengthening	10/1505	37/18723	0.000507539	0.014139	0.0126675	CCT3/CCT2/TCP1/NEK2/MAPKAPK5/CCT5/CCT6A/DKC1/CCT4/HNRNPA1	10
BP	GO:1905818	regulation of chromosome separation	15/1505	72/18723	0.000512085	0.0141935	0.0127164	PTTG1/BUB1B/TPR/CCNB1/CENPF/ZWINT/CDC16/MAD2L1/TACC3/CSNK2A1/UBE2C/CDT1/CSNK2A2/CDC27/TRIP13	15
BP	GO:0009147	pyrimidine nucleoside triphosphate metabolic process	8/1505	25/18723	0.000534255	0.014587	0.0130689	DUT/TYMS/DTYMK/NME3/DCTPP1/UCK2/NME7/CTPS1	8
BP	GO:0033119	negative regulation of RNA splicing	8/1505	25/18723	0.000534255	0.014587	0.0130689	SRSF7/RPS26/NPM1/RNPS1/TMBIM6/HNRNPK/SRSF6/C1QBP	8
BP	GO:0070199	establishment of protein localization to chromosome	8/1505	25/18723	0.000534255	0.014587	0.0130689	CCT3/CCT2/TCP1/CCT5/LRWD1/CCT6A/DKC1/CCT4	8
BP	GO:0032204	regulation of telomere maintenance	16/1505	80/18723	0.000546206	0.0147664	0.0132296	CCT3/CCT2/PINX1/TCP1/HNRNPC/NEK2/MAPKAPK5/CCT5/CCT6A/GNL3L/DKC1/HNRNPD/CCT4/SRC/TEN1/HNRNPA1	16
BP	GO:0051303	establishment of chromosome localization	16/1505	80/18723	0.000546206	0.0147664	0.0132296	PSRC1/CDCA8/PINX1/PIBF1/RMDN1/CCNB1/KIF22/CENPF/NUF2/KIFC1/EML3/ACTR2/CDT1/NUP62/KPNB1/BOD1	16
BP	GO:0009126	purine nucleoside monophosphate metabolic process	11/1505	44/18723	0.000559645	0.0150556	0.0134887	GART/ADSL/GDA/GMPR2/ADK/IMPDH2/HPRT1/AMPD2/APRT/NT5C/PFAS	11
BP	GO:0035601	protein deacylation	20/1505	112/18723	0.00056601	0.0150596	0.0134923	SIRT1/MIER1/SMARCAD1/LYPLAL1/MORF4L2/SIRT5/SFPQ/MAPK8/MSL3/NCAPG2/TBL1XR1/ABHD17B/HDAC2/JDP2/SPRED1/LYPLA1/SPHK2/PHB/HDAC5/MORF4L1	20
BP	GO:0006979	response to oxidative stress	56/1505	446/18723	0.000567629	0.0150596	0.0134923	BTG1/SIRT1/ATF2/NDUFA12/EEF2/THG1L/ALAD/APEX1/EIF2S1/PCNA/CRYAB/RPS3/CAT/PDLIM1/PRDX3/PRDX5/NONO/PNPT1/LANCL1/RIPK1/IMPACT/TRAP1/CHUK/SFPQ/PLEKHA1/WRN/PPIF/MAPK8/ETS1/STK26/MCL1/PPIA/PAWR/MGST1/RAD52/RBX1/RACK1/HNRNPM/KEAP1/FXN/HDAC2/FOXO3/FUT8/TPM1/VRK2/GSS/SRC/CHD6/OXR1/SESN3/PTPN11/HSPD1/STAT1/COL1A1/UBE3A/NUDT15	56
BP	GO:0009161	ribonucleoside monophosphate metabolic process	13/1505	58/18723	0.000570771	0.0150596	0.0134923	GART/ADSL/GDA/GMPR2/ADK/RFK/IMPDH2/HPRT1/AMPD2/UCK2/APRT/NT5C/PFAS	13
BP	GO:2001244	positive regulation of intrinsic apoptotic signaling pathway	13/1505	58/18723	0.000570771	0.0150596	0.0134923	SIRT1/CAV1/RPS3/RPL11/SFPQ/MCL1/DNM1L/BID/RACK1/NCK1/RPS7/NACC2/PLEKHF1	13
BP	GO:0042770	signal transduction in response to DNA damage	27/1505	172/18723	0.00059328	0.0153509	0.0137532	CDK2/SIRT1/ATF2/KDM1A/MSH2/INTS7/CHEK2/RFWD3/CDC5L/PSMD10/PPM1D/NPM1/SOX4/DDX39B/MUS81/CCND1/TIPRL/RHNO1/BID/BABAM1/FOXO3/SPRED1/RNASEH2B/HINFP/PTPN11/TP53BP1/ATRIP	27
BP	GO:0031331	positive regulation of cellular catabolic process	54/1505	427/18723	0.00059516	0.0153509	0.0137532	CD81/SIRT1/SUMO1/PUM1/CAV1/IGF1/RCHY1/ADRB2/CSNK1A1/SPTLC1/SOCS4/TRIM21/TARDBP/RC3H1/RNFT1/METTL16/TRIM38/PTEN/PSMD10/MAP3K7/PNPT1/CNOT1/CALCOCO2/RNF128/CNOT7/AMER1/DTX3L/USP5/BID/RBX1/HNRNPD/RACK1/KEAP1/INSR/FOXO3/PIAS1/ARIH1/HNRNPR/YTHDF2/RIPK2/MTDH/UBE2V2/SESN3/BTG2/DVL1/RALB/PLEKHF1/HSPBP1/SUMO2/LRP2/ORMDL3/NT5C3B/HECTD1/FYCO1	54
BP	GO:0043101	purine-containing compound salvage	5/1505	10/18723	0.000595797	0.0153509	0.0137532	ADK/HPRT1/AMPD2/PRTFDC1/APRT	5
BP	GO:1990416	cellular response to brain-derived neurotrophic factor stimulus	5/1505	10/18723	0.000595797	0.0153509	0.0137532	EEF2/EIF4A3/EEF2K/NTRK2/UBE3A	5
BP	GO:2000234	positive regulation of rRNA processing	5/1505	10/18723	0.000595797	0.0153509	0.0137532	DIMT1/WDR43/UTP15/HEATR1/WDR75	5
BP	GO:0019439	aromatic compound catabolic process	58/1505	467/18723	0.000600562	0.0154013	0.0137985	FXR1/SSB/FASTKD1/PUM1/SERBP1/LSM5/MAGOHB/DDX49/GDA/EPHX2/HNRNPC/APEX1/DUT/EIF3E/TARDBP/NMNAT1/RC3H1/DHX9/LSM6/METTL16/EIF4A3/PNPT1/CNOT1/NPM1/EXOG/RNPS1/DCTPP1/AGO1/CNOT7/PABPC4/TET1/RNH1/MUS81/RNASEH2C/HPRT1/DKC1/NUDT4/DERA/HNRNPD/HNRNPM/RNASEH1/SYNCRIP/LRPPRC/HNRNPR/REXO4/RNASEH2B/NUDT5/YTHDF2/XRN2/PDE7A/ACAT1/BTG2/NT5C/PRKCA/FXR2/NT5C3B/PAIP1/NUDT15	58
BP	GO:0034249	negative regulation of cellular amide metabolic process	38/1505	273/18723	0.000625896	0.0159764	0.0143136	FXR1/PUM1/IGF1/DAPK3/EIF2S1/EIF3E/RPS3/RGS2/TARDBP/RC3H1/TPR/METTL16/EIF4A3/TYMS/RBM4/PNPT1/CNOT1/DDX3X/AGO1/CNOT7/PUS7/BANK1/EIF4E/HNRNPD/RACK1/NTRK2/SYNCRIP/RTN4/HNRNPR/YTHDF2/MRPL13/DDX6/BTG2/RPL13A/FXR2/ORMDL3/NT5C3B/LSM14A	38
BP	GO:0090068	positive regulation of cell cycle process	34/1505	236/18723	0.00063774	0.0162033	0.014517	RACGAP1/IGF1/APEX1/NUSAP1/TPR/PLRG1/CHEK2/RAD51C/CCNB1/PLK4/NPM1/MEPCE/DDX3X/DDX39B/SFPQ/KIF20B/LRP5/CCND1/RANBP1/TFDP1/CDC16/GPSM2/RHNO1/MAD2L1/LSM11/INSR/PHIP/TMOD3/PRKCE/CDC42/UBE2C/CDT1/NUP62/CDC27	34
BP	GO:0043555	regulation of translation in response to stress	7/1505	20/18723	0.000650298	0.0164462	0.0147346	EIF2S1/RBM4/RPS6KA3/NPM1/DDX3X/IMPACT/NCK1	7
BP	GO:0006325	chromatin organization	52/1505	409/18723	0.000658133	0.016568	0.0148437	SIRT1/ACTB/NASP/SMARCAD1/DAPK3/HMGN3/HNRNPC/TPR/TRIM28/HELLS/NPM3/MKI67/DNAJC9/ASF1B/HLTF/NPM1/SMCHD1/LRWD1/TET1/NAP1L4/PAK1/KDM6A/MCM2/NAP1L1/SMARCC2/MBD3/SAFB/BABAM1/HMGB2/SMARCA2/HDAC2/KAT2B/HP1BP3/DNMT3A/HMGN2/NUDT5/ZMYND11/RBL1/CHD6/ATAD2/PHF21A/SMARCB1/CHD9/RBL2/GRWD1/CBX2/TADA2A/NCOR1/MBTD1/HDAC5/CHD2/PBRM1	52
BP	GO:0000463	maturation of LSU-rRNA from tricistronic rRNA transcript (SSU-rRNA, 5.8S rRNA, LSU-rRNA)	6/1505	15/18723	0.000708254	0.0174721	0.0156537	NIFK/RPF2/RPL35/FTSJ3/WDR12/BOP1	6
BP	GO:0006271	DNA strand elongation involved in DNA replication	6/1505	15/18723	0.000708254	0.0174721	0.0156537	RFC4/PCNA/MCM3/MCM7/POLD2/MCM4	6
BP	GO:0009163	nucleoside biosynthetic process	6/1505	15/18723	0.000708254	0.0174721	0.0156537	AMD1/ADK/DTYMK/HPRT1/PRTFDC1/APRT	6
BP	GO:0034404	nucleobase-containing small molecule biosynthetic process	6/1505	15/18723	0.000708254	0.0174721	0.0156537	AMD1/ADK/DTYMK/HPRT1/PRTFDC1/APRT	6
BP	GO:2001020	regulation of response to DNA damage stimulus	32/1505	219/18723	0.000709963	0.0174721	0.0156537	SIRT1/FXR1/KDM1A/PCNA/RPS3/DHX9/CHEK2/RFWD3/TRIM28/TAF9/PSMD10/PARP9/NPM1/SMCHD1/DDX39B/NSMCE1/KMT5B/USP1/DTX3L/MCL1/RAD52/BID/BABAM1/HNRNPK/SPRED1/ACTR2/NACC2/RNASEH2B/UBE2V2/TRIP12/FXR2/TP53BP1	32
BP	GO:0043094	cellular metabolic compound salvage	8/1505	26/18723	0.000717774	0.0175855	0.0157553	ADK/HPRT1/AMPD2/UCK2/PDXK/PRTFDC1/APIP/APRT	8
BP	GO:0050000	chromosome localization	16/1505	82/18723	0.000726159	0.0176383	0.0158026	PSRC1/CDCA8/PINX1/PIBF1/RMDN1/CCNB1/KIF22/CENPF/NUF2/KIFC1/EML3/ACTR2/CDT1/NUP62/KPNB1/BOD1	16
BP	GO:0042176	regulation of protein catabolic process	50/1505	391/18723	0.000726358	0.0176383	0.0158026	CDK2/CD81/SUMO1/RPL5/CAV1/RCHY1/CSNK1A1/ALAD/EEF1A1/PSME2/SOCS4/CHEK2/RNFT1/SNF8/RPL23/TAF9/HSP90AB1/PTEN/PSMD10/CAMLG/RPL11/RNF128/OGT/AMER1/USP5/RBX1/DESI1/MAD2L1/RACK1/KEAP1/RPS7/PIAS1/STYX/PSME1/ARIH1/XPO1/ODC1/CSNK2A1/EIF3H/UBE2V2/UCHL5/DVL1/CSNK2A2/HSPBP1/SUMO2/LRP2/PHB/HECTD1/UBE3A/NUDT15	50
BP	GO:0032436	positive regulation of proteasomal ubiquitin-dependent protein catabolic process	17/1505	90/18723	0.000741201	0.0178736	0.0160134	SUMO1/CAV1/RCHY1/CSNK1A1/SOCS4/PSMD10/USP5/RBX1/RACK1/KEAP1/PIAS1/ARIH1/UBE2V2/DVL1/HSPBP1/SUMO2/HECTD1	17
BP	GO:0070301	cellular response to hydrogen peroxide	18/1505	98/18723	0.000742561	0.0178736	0.0160134	SIRT1/APEX1/PCNA/RPS3/RIPK1/IMPACT/TRAP1/PLEKHA1/PPIF/ETS1/STK26/PAWR/RACK1/FXN/HDAC2/FOXO3/SRC/PTPN11	18
BP	GO:0043967	histone H4 acetylation	14/1505	67/18723	0.000754149	0.0180732	0.0161923	SIRT1/ATF2/MORF4L2/OGT/NAA50/MSL3/ZZZ3/YEATS4/ATG5/SMARCB1/MSL1/KANSL1/IWS1/MORF4L1	14
BP	GO:0031570	DNA integrity checkpoint	21/1505	123/18723	0.000771112	0.0183994	0.0164845	CDK2/ATF2/MSH2/INTS7/CHEK2/RFWD3/CDC5L/SOX4/DDX39B/MUS81/CCND1/CDC45/TIPRL/RHNO1/BABAM1/RNASEH2B/HINFP/PTPN11/CDT1/TP53BP1/ATRIP	21
BP	GO:0072594	establishment of protein localization to organelle	53/1505	422/18723	0.000781855	0.018575	0.0166418	BMP4/HSPA8/SUMO1/PEX19/CCT3/CCT2/M6PR/TOMM22/TIMM44/TOMM5/PEX7/TCP1/PEX13/ANGPT1/TIMM8B/TARDBP/TPR/TRIM28/SNF8/RPL23/KPNA2/IPO11/CCT5/MON1A/HSP90AB1/AP3M1/MTERF4/LRWD1/CCT6A/MAPK8/RHOU/TIMM8A/DKC1/SMO/PEX5/BID/UBE2D3/SRPRB/DNAJA1/CCT4/IPO5/CSE1L/IPO7/HSPD1/HEATR3/NUP93/CSNK2A2/TOMM40/NUP62/KPNB1/TNPO1/CHCHD4/APPL1	53
BP	GO:0043488	regulation of mRNA stability	25/1505	158/18723	0.000825801	0.0195345	0.0175014	FXR1/FASTKD1/PUM1/SERBP1/HNRNPC/APEX1/TARDBP/RC3H1/DHX9/METTL16/PNPT1/CNOT1/NPM1/CNOT7/PABPC4/HNRNPD/HNRNPM/SYNCRIP/HNRNPR/YTHDF2/BTG2/PRKCA/FXR2/NT5C3B/PAIP1	25
BP	GO:0001510	RNA methylation	16/1505	83/18723	0.000833633	0.0196351	0.0175916	DIMT1/TRMT10C/METTL5/TYW3/METTL1/EMG1/MTO1/TFB2M/CMTR2/METTL16/FTSJ3/HSD17B10/LARP7/MEPCE/RNMT/TGS1	16
BP	GO:0051983	regulation of chromosome segregation	17/1505	91/18723	0.000844469	0.0198053	0.0177441	PUM1/PTTG1/BUB1B/TPR/CCNB1/MKI67/CENPF/ZWINT/CDC16/MAD2L1/TACC3/CSNK2A1/UBE2C/CDT1/CSNK2A2/CDC27/TRIP13	17
BP	GO:0043434	response to peptide hormone	52/1505	414/18723	0.000869983	0.0203169	0.0182024	RPS6KB1/BTG1/MSTN/RAB8A/SIRT1/EIF2B5/PIK3R3/CAV1/APEX1/EIF2B4/HADHA/CAT/HSD11B2/CDC5L/PTEN/STXBP3/CAV2/PNPT1/OGT/EEF2K/BAIAP2L1/CHUK/LRP5/ESRRA/PAK1/PIK3CA/RANGAP1/USO1/NCK1/INSR/SLC27A1/DENND4C/KANK1/PHIP/KAT2B/KL/SRC/SRSF6/NCOA5/GGH/SESN3/BTG2/SLC25A33/TLR2/PTPN11/STAT1/APRT/BAIAP2/COL1A1/HDAC5/SCAP/APPL1	52
BP	GO:1904031	positive regulation of cyclin-dependent protein kinase activity	9/1505	33/18723	0.000896069	0.0206771	0.0185251	CKS1B/PSRC1/CKS2/CCNB1/HSP90AB1/PSMD10/CCND1/SRC/CCNT2	9
BP	GO:0008286	insulin receptor signaling pathway	20/1505	116/18723	0.00089671	0.0206771	0.0185251	RPS6KB1/MSTN/SIRT1/PIK3R3/CAV2/OGT/BAIAP2L1/PAK1/PIK3CA/NCK1/INSR/KANK1/PHIP/KL/SRC/NCOA5/SESN3/PTPN11/BAIAP2/APPL1	20
BP	GO:0098732	macromolecule deacylation	20/1505	116/18723	0.00089671	0.0206771	0.0185251	SIRT1/MIER1/SMARCAD1/LYPLAL1/MORF4L2/SIRT5/SFPQ/MAPK8/MSL3/NCAPG2/TBL1XR1/ABHD17B/HDAC2/JDP2/SPRED1/LYPLA1/SPHK2/PHB/HDAC5/MORF4L1	20
BP	GO:0045786	negative regulation of cell cycle	49/1505	385/18723	0.000906013	0.0208042	0.018639	CDK2/BMP4/BTG1/ATF2/PRKACB/CDKN2C/PTTG1/PINX1/BUB1B/MSH2/TPR/INTS7/NEK2/CHEK2/RFWD3/SLFN11/CCNB1/CDC5L/PTEN/CENPF/NPM1/SOX4/DDX39B/ZWINT/MUS81/CCND1/CDC45/TIPRL/RHNO1/MAD2L1/APBB2/BABAM1/FZD3/KAT2B/YTHDC2/NACC2/RNASEH2B/IPO5/RBL1/IPO7/HINFP/BTG2/METTL13/PTPN11/CDT1/RBL2/TRIP13/TP53BP1/ATRIP	49
BP	GO:0062197	NA	44/1505	337/18723	0.000962483	0.0220088	0.0197182	SIRT1/ATF2/CAV1/APEX1/EIF2S1/PCNA/RPS3/PRDX3/PRDX5/NONO/PNPT1/LANCL1/DDX3X/RIPK1/IMPACT/TRAP1/CHUK/SFPQ/PLEKHA1/PPIF/MAPK8/ETS1/STK26/MCL1/PPIA/PIK3CA/PAWR/MGST1/RAD52/XRCC6/RACK1/KEAP1/FXN/DNAJA1/HDAC2/FOXO3/ATG5/FUT8/TPM1/VRK2/SRC/CHD6/OXR1/PTPN11	44
BP	GO:0000082	G1/S transition of mitotic cell cycle	31/1505	214/18723	0.000985754	0.0224438	0.020108	CDK2/RPS6KB1/ITGB1/CDKN2C/NASP/PTPN6/PSME2/APEX1/ID2/CUL5/PLRG1/CHEK2/RFWD3/SLFN11/PTEN/MEPCE/DDX3X/SOX4/CCND1/TFDP1/CUL1/BID/EIF4E/LSM11/PIAS1/PSME1/NACC2/RBL1/HINFP/RBL2/APPL1	31
BP	GO:0070266	necroptotic process	10/1505	40/18723	0.000989685	0.0224438	0.020108	CASP8/CAV1/ZBP1/OGT/RIPK1/IPMK/PPIF/DNM1L/PELI1/RBCK1	10
BP	GO:0051225	spindle assembly	20/1505	117/18723	0.00100154	0.0224832	0.0201433	TUBGCP5/RACGAP1/HAUS4/CCNB2/PIBF1/TPX2/RPS3/TPR/NEK2/CHEK2/DRG1/KIF11/KIFC1/EML3/GPSM2/SENP6/MAPRE1/NCOR1/KPNB1/LSM14A	20
BP	GO:0043393	regulation of protein binding	29/1505	196/18723	0.0010086	0.0224832	0.0201433	BMP4/ACTB/NMD3/KDM1A/CAV1/ADRB2/ANGPT1/TRIM21/PRMT7/HSP90AB1/DKK1/RPL11/DTNBP1/MAPK8/GNL3L/DTX3L/TMBIM6/ADD1/RACK1/STYX/CDC42/MAPRE1/SRC/RIPK2/DVL1/RALB/AKTIP/SYMPK/HDAC5	29
BP	GO:0097300	programmed necrotic cell death	11/1505	47/18723	0.00101683	0.0224832	0.0201433	CASP8/CAV1/ZBP1/OGT/RIPK1/IPMK/PPIF/DNM1L/ALKBH7/PELI1/RBCK1	11
BP	GO:0015937	coenzyme A biosynthetic process	5/1505	11/18723	0.0010201	0.0224832	0.0201433	SLC25A16/PANK1/PPCS/PANK2/ACAT1	5
BP	GO:0042451	purine nucleoside biosynthetic process	5/1505	11/18723	0.0010201	0.0224832	0.0201433	AMD1/ADK/HPRT1/PRTFDC1/APRT	5
BP	GO:0042455	ribonucleoside biosynthetic process	5/1505	11/18723	0.0010201	0.0224832	0.0201433	AMD1/ADK/HPRT1/PRTFDC1/APRT	5
BP	GO:0046129	purine ribonucleoside biosynthetic process	5/1505	11/18723	0.0010201	0.0224832	0.0201433	AMD1/ADK/HPRT1/PRTFDC1/APRT	5
BP	GO:0071103	DNA conformation change	39/1505	290/18723	0.00104462	0.0229316	0.020545	SIRT1/RFC4/NASP/SMARCAD1/NCAPG/NUSAP1/DHX9/TOP2A/CCNB1/MCM3/MCM7/HELLS/DNAJC9/ASF1B/SMC2/NPM1/DDX3X/TOP2B/WRN/NAP1L4/MCM2/NCAPG2/NAP1L1/MCM5/NCAPD2/XRCC6/CHD1/HMGB2/NCAPH/HP1BP3/DDX1/CHD6/DSCC1/MCM4/NCAPD3/CHD9/MCM6/GRWD1/CHD2	39
BP	GO:0001732	formation of cytoplasmic translation initiation complex	6/1505	16/18723	0.00105652	0.0230086	0.020614	EIF3D/EIF3G/EIF3E/EIF3K/EIF3L/EIF3H	6
BP	GO:0019081	viral translation	6/1505	16/18723	0.00105652	0.0230086	0.020614	SSB/EIF3D/EIF3G/DHX9/EIF3L/DENR	6
BP	GO:2001235	positive regulation of apoptotic signaling pathway	21/1505	126/18723	0.00106254	0.0230482	0.0206495	SIRT1/CAV1/DAPK3/RPS3/PTEN/RPL11/RIPK1/TRAF7/SFPQ/MCL1/DNM1L/BID/RACK1/NCK1/RPS7/TPD52L1/THBS1/NACC2/RBCK1/PPP2R1B/PLEKHF1	21
BP	GO:0017038	protein import	30/1505	206/18723	0.00108161	0.0233695	0.0209374	BMP4/HSPA8/SUMO1/PEX19/TOMM22/TIMM44/PEX7/PEX13/ANGPT1/TARDBP/TPR/TRIM28/RPL23/KPNA2/IPO11/HSP90AB1/SMO/PEX5/IPO5/CSE1L/IPO7/HSPD1/HEATR3/NUP93/TOMM40/NUP62/KPNB1/TNPO1/CHCHD4/APPL1	30
BP	GO:0031124	mRNA 3'-end processing	13/1505	62/18723	0.00111239	0.0239404	0.0214489	WDR33/FIP1L1/PAPOLG/CSTF1/CSTF3/NUDT21/CCNB1/PCF11/PNPT1/CPSF4/CPSF6/LSM11/SYMPK	13
BP	GO:0006414	translational elongation	12/1505	55/18723	0.00118381	0.0253779	0.0227367	EEF1B2/LTN1/DPH5/EEF2/EEF1A1/EIF4A3/EEF1G/USP16/TUFM/EEF2K/RPLP2/RACK1	12
BP	GO:0000470	maturation of LSU-rRNA	8/1505	28/18723	0.00123571	0.0263438	0.0236021	NIFK/RPF2/RPL35/FTSJ3/RPL10A/WDR12/RSL1D1/BOP1	8
BP	GO:0017148	negative regulation of translation	34/1505	245/18723	0.00123847	0.0263438	0.0236021	FXR1/PUM1/DAPK3/EIF2S1/EIF3E/RPS3/RGS2/TARDBP/RC3H1/TPR/METTL16/EIF4A3/TYMS/RBM4/PNPT1/CNOT1/DDX3X/AGO1/CNOT7/PUS7/BANK1/EIF4E/HNRNPD/RACK1/SYNCRIP/HNRNPR/YTHDF2/MRPL13/DDX6/BTG2/RPL13A/FXR2/NT5C3B/LSM14A	34
BP	GO:0046390	ribose phosphate biosynthetic process	28/1505	190/18723	0.00129823	0.0275084	0.0246455	ELOVL6/GART/ATP6V1A/ADSL/SLC26A2/ACLY/ADK/RFK/IMPDH2/SLC25A16/SLC35B2/NME3/PAPSS2/PANK1/PPCS/HPRT1/AMPD2/UCK2/PANK2/ACAT1/NME7/ENO1/APRT/SPHK2/ACACA/PFAS/PRPSAP2/CTPS1	28
BP	GO:0009260	ribonucleotide biosynthetic process	27/1505	182/18723	0.00141976	0.0299679	0.026849	ELOVL6/GART/ATP6V1A/ADSL/SLC26A2/ACLY/ADK/RFK/IMPDH2/SLC25A16/SLC35B2/NME3/PAPSS2/PANK1/PPCS/HPRT1/AMPD2/UCK2/PANK2/ACAT1/NME7/ENO1/APRT/SPHK2/ACACA/PFAS/CTPS1	27
BP	GO:0051099	positive regulation of binding	26/1505	173/18723	0.00142522	0.0299679	0.026849	BMP4/NMD3/KDM1A/CAV1/IGF1/EIF3D/PINX1/EIF2S1/CALM2/EIF3E/TRIM21/DHX9/TRIM28/HSP90AB1/PARP9/RPL11/DTX3L/HES1/ADD1/HMGB2/STMN1/MAPRE1/RIPK2/RALB/CDT1/AKTIP	26
BP	GO:0007076	mitotic chromosome condensation	6/1505	17/18723	0.00152249	0.0316494	0.0283555	NCAPG/NUSAP1/SMC2/NCAPD2/NCAPH/NCAPD3	6
BP	GO:0009200	deoxyribonucleoside triphosphate metabolic process	6/1505	17/18723	0.00152249	0.0316494	0.0283555	DUT/TYMS/ADK/DTYMK/DCTPP1/NUDT15	6
BP	GO:2000811	negative regulation of anoikis	6/1505	17/18723	0.00152249	0.0316494	0.0283555	ITGB1/CAV1/MCL1/PIK3CA/NTRK2/SRC	6
BP	GO:0045931	positive regulation of mitotic cell cycle	20/1505	121/18723	0.00153256	0.0317384	0.0284352	RPS6KB1/APEX1/PLRG1/RAD51C/CCNB1/MEPCE/DDX3X/CCND1/DYNLT3/TFDP1/CDC16/HES1/EIF4E/LSM11/TMOD3/UBE2C/PTPN11/CDT1/PRKCA/CDC27	20
BP	GO:0045737	positive regulation of cyclin-dependent protein serine/threonine kinase activity	8/1505	29/18723	0.00158762	0.0327552	0.0293462	CKS1B/PSRC1/CKS2/CCNB1/PSMD10/CCND1/SRC/CCNT2	8
BP	GO:0006753	nucleoside phosphate metabolic process	59/1505	497/18723	0.00162394	0.0333789	0.029905	ELOVL6/GART/ATP6V1A/NT5C3A/IGF1/ADSL/SLC26A2/GDA/GMPR2/DUT/NMNAT1/ACLY/AK6/MCEE/TYMS/ADK/PARP9/RFK/IMPDH2/SLC25A16/OGT/SUCLG2/SLC35B2/DTYMK/NME3/DCTPP1/PAPSS2/PANK1/PPCS/HPRT1/AMPD2/UCK2/NUDT4/DERA/TPI1/INSR/RRM2/RNASEH2B/NAXD/NUDT5/PANK2/PDE7A/ACAT1/NME7/ENO1/APRT/SPHK2/TK1/GALK1/NT5C/ACACA/ALDOC/PFAS/NCOR1/PRPSAP2/NT5C3B/NADK2/CTPS1/NUDT15	59
BP	GO:0045943	positive regulation of transcription by RNA polymerase I	7/1505	23/18723	0.00166061	0.0338789	0.030353	LYAR/WDR43/UTP15/HEATR1/SMARCB1/UBTF/WDR75	7
BP	GO:0051131	chaperone-mediated protein complex assembly	7/1505	23/18723	0.00166061	0.0338789	0.030353	CCT2/BBS12/HSP90AB1/PSMG3/BBS10/MKKS/HSPD1	7
BP	GO:0061013	regulation of mRNA catabolic process	25/1505	166/18723	0.00169056	0.0343623	0.0307861	FXR1/FASTKD1/PUM1/SERBP1/HNRNPC/APEX1/TARDBP/RC3H1/DHX9/METTL16/PNPT1/CNOT1/NPM1/CNOT7/PABPC4/HNRNPD/HNRNPM/SYNCRIP/HNRNPR/YTHDF2/BTG2/PRKCA/FXR2/NT5C3B/PAIP1	25
BP	GO:0034599	cellular response to oxidative stress	38/1505	288/18723	0.0017043	0.0345137	0.0309218	SIRT1/ATF2/APEX1/EIF2S1/PCNA/RPS3/PRDX3/PRDX5/NONO/PNPT1/LANCL1/RIPK1/IMPACT/TRAP1/CHUK/SFPQ/PLEKHA1/PPIF/MAPK8/ETS1/STK26/MCL1/PPIA/PAWR/MGST1/RAD52/RACK1/KEAP1/FXN/HDAC2/FOXO3/FUT8/TPM1/VRK2/SRC/CHD6/OXR1/PTPN11	38
BP	GO:0010965	regulation of mitotic sister chromatid separation	13/1505	65/18723	0.00175547	0.0351606	0.0315013	PTTG1/BUB1B/TPR/CCNB1/CENPF/ZWINT/CDC16/MAD2L1/TACC3/UBE2C/CDT1/CDC27/TRIP13	13
BP	GO:0048524	positive regulation of viral process	13/1505	65/18723	0.00175547	0.0351606	0.0315013	TRIM11/HACD3/TRIM21/DHX9/TOP2A/KPNA2/TRIM38/CAV2/DDX3X/TOP2B/CNOT7/PPIA/PPID	13
BP	GO:0070936	protein K48-linked ubiquitination	13/1505	65/18723	0.00175547	0.0351606	0.0315013	NMI/RNF115/FBXO38/KBTBD7/DTX3L/CUL1/PPIA/RBX1/UBE2D3/RNF146/PELI1/UBE2C/UBE3A	13
BP	GO:0009117	nucleotide metabolic process	58/1505	489/18723	0.00180537	0.0358864	0.0321516	ELOVL6/GART/ATP6V1A/NT5C3A/IGF1/ADSL/SLC26A2/GDA/GMPR2/DUT/NMNAT1/ACLY/AK6/MCEE/TYMS/ADK/PARP9/RFK/IMPDH2/SLC25A16/OGT/SUCLG2/SLC35B2/DTYMK/NME3/DCTPP1/PAPSS2/PANK1/PPCS/HPRT1/AMPD2/UCK2/NUDT4/DERA/TPI1/INSR/RRM2/RNASEH2B/NAXD/NUDT5/PANK2/PDE7A/ACAT1/NME7/ENO1/APRT/SPHK2/GALK1/NT5C/ACACA/ALDOC/PFAS/NCOR1/PRPSAP2/NT5C3B/NADK2/CTPS1/NUDT15	58
BP	GO:0044843	cell cycle G1/S phase transition	33/1505	241/18723	0.00181166	0.0358864	0.0321516	CDK2/RPS6KB1/ITGB1/CDKN2C/NASP/PTPN6/PSME2/APEX1/ID2/CUL5/PLRG1/CHEK2/RFWD3/SLFN11/PTEN/MEPCE/DDX3X/SOX4/CCND1/TFDP1/CUL1/BID/EIF4E/LSM11/PLPP2/PIAS1/PSME1/NACC2/RBL1/HINFP/METTL13/RBL2/APPL1	33
BP	GO:0051865	protein autoubiquitination	14/1505	73/18723	0.00181207	0.0358864	0.0321516	LTN1/RNF115/TRIM21/RNFT1/DTX3L/KLHL24/RBX1/UBE2D3/UHRF1/UHRF2/RNF146/HECTD1/UBE3A/RNF186	14
BP	GO:0043254	regulation of protein complex assembly	52/1505	428/18723	0.00181786	0.0358864	0.0321516	HSPA8/SUMO1/PSRC1/CAND1/CRYAB/RPS3/DRG1/DKK1/AKAP9/DDX3X/CARMIL1/ARHGAP28/IMPACT/BAIAP2L1/ELN/SSH3/PAK1/GNL3L/KANK4/RHOC/TFRC/CAPZA2/BBS10/TWF1/PEX5/BID/CDC42EP1/AP1AR/ADD1/RACK1/NCK1/KANK1/SENP6/GMFB/FERMT2/TMOD3/NIN/PRKCE/CDC42/ACTR2/ARPC5L/STMN1/MKKS/MAPRE1/SRC/PTPN11/RALB/CDT1/RPL13A/BAIAP2/NCKAP1/ARFGEF1	52
BP	GO:0000077	DNA damage checkpoint	19/1505	115/18723	0.00199437	0.0392297	0.0351469	CDK2/ATF2/MSH2/INTS7/CHEK2/RFWD3/CDC5L/SOX4/DDX39B/MUS81/CCND1/TIPRL/RHNO1/BABAM1/RNASEH2B/HINFP/PTPN11/TP53BP1/ATRIP	19
BP	GO:0032200	telomere organization	24/1505	159/18723	0.00200579	0.0393134	0.0352219	CCT3/CCT2/GAR1/PINX1/TCP1/HNRNPC/APEX1/PCNA/NEK2/MAPKAPK5/RAD51C/CCT5/HSP90AB1/CCT6A/WRN/GNL3L/DKC1/XRCC6/HNRNPD/CCT4/SRC/TEN1/RAD51D/HNRNPA1	24
BP	GO:0031365	N-terminal protein amino acid modification	8/1505	30/18723	0.00201436	0.039341	0.0352466	METAP2/NTMT1/SOX4/NAA50/KAT2B/NAA30/HHAT/NAA15	8
BP	GO:0016575	histone deacetylation	15/1505	82/18723	0.00207074	0.0401563	0.0359771	SIRT1/MIER1/SMARCAD1/MORF4L2/SFPQ/MAPK8/MSL3/NCAPG2/TBL1XR1/HDAC2/JDP2/SPHK2/PHB/HDAC5/MORF4L1	15
BP	GO:2001252	positive regulation of chromosome organization	15/1505	82/18723	0.00207074	0.0401563	0.0359771	CCT3/CCT2/TCP1/TPR/NEK2/MAPKAPK5/TRIM28/CCT5/CCT6A/SFPQ/DKC1/HNRNPD/CCT4/CDT1/HNRNPA1	15
BP	GO:2000060	positive regulation of ubiquitin-dependent protein catabolic process	18/1505	107/18723	0.00210512	0.0406793	0.0364456	SUMO1/CAV1/RCHY1/CSNK1A1/SOCS4/PTEN/PSMD10/USP5/RBX1/RACK1/KEAP1/PIAS1/ARIH1/UBE2V2/DVL1/HSPBP1/SUMO2/HECTD1	18
BP	GO:0015936	coenzyme A metabolic process	6/1505	18/18723	0.00212973	0.0410103	0.0367422	ACLY/SLC25A16/PANK1/PPCS/PANK2/ACAT1	6
BP	GO:0009262	deoxyribonucleotide metabolic process	10/1505	44/18723	0.00215816	0.0411054	0.0368274	GDA/DUT/TYMS/ADK/DTYMK/DCTPP1/DERA/RRM2/NT5C/NUDT15	10
BP	GO:0043039	tRNA aminoacylation	10/1505	44/18723	0.00215816	0.0411054	0.0368274	FARSB/RARS2/GATC/LARS2/QRSL1/CARS2/IARS2/DARS2/MARS2/SARS2	10
BP	GO:1902745	positive regulation of lamellipodium organization	9/1505	37/18723	0.00215873	0.0411054	0.0368274	MSTN/CARMIL1/PLCE1/PIK3CA/DNM2/CDC42/ACTR2/SRC/NCKAP1	9
BP	GO:2000045	regulation of G1/S transition of mitotic cell cycle	22/1505	142/18723	0.00216462	0.0411054	0.0368274	CDK2/PTPN6/PSME2/APEX1/ID2/PLRG1/CHEK2/RFWD3/SLFN11/PTEN/MEPCE/DDX3X/SOX4/CCND1/TFDP1/BID/LSM11/PSME1/NACC2/RBL1/RBL2/APPL1	22
BP	GO:0051306	mitotic sister chromatid separation	13/1505	67/18723	0.00233496	0.0441872	0.0395884	PTTG1/BUB1B/TPR/CCNB1/CENPF/ZWINT/CDC16/MAD2L1/TACC3/UBE2C/CDT1/CDC27/TRIP13	13
BP	GO:1903363	negative regulation of cellular protein catabolic process	14/1505	75/18723	0.00236389	0.0445808	0.0399411	RPL5/ALAD/RPL23/TAF9/HSP90AB1/CAMLG/RPL11/OGT/RPS7/STYX/CSNK2A1/EIF3H/UCHL5/CSNK2A2	14
BP	GO:0090501	RNA phosphodiester bond hydrolysis	23/1505	152/18723	0.00238041	0.0446097	0.039967	ISG20L2/FIP1L1/APEX1/RPP38/RPS21/LACTB2/CSTF3/POP5/NUDT21/ENDOV/POP7/PCF11/NOP9/PNPT1/CNOT1/EXOG/CPSF4/CNOT7/CPSF6/RNASEH1/XRN2/BOP1/TSEN34	23
BP	GO:1901361	organic cyclic compound catabolic process	58/1505	495/18723	0.00238168	0.0446097	0.039967	FXR1/SSB/FASTKD1/PUM1/SERBP1/LSM5/MAGOHB/DDX49/GDA/EPHX2/HNRNPC/APEX1/DUT/EIF3E/TARDBP/NMNAT1/RC3H1/DHX9/LSM6/METTL16/EIF4A3/PNPT1/CNOT1/NPM1/EXOG/RNPS1/DCTPP1/AGO1/CNOT7/PABPC4/TET1/RNH1/MUS81/RNASEH2C/HPRT1/DKC1/NUDT4/DERA/HNRNPD/HNRNPM/RNASEH1/SYNCRIP/LRPPRC/HNRNPR/REXO4/RNASEH2B/NUDT5/YTHDF2/XRN2/PDE7A/ACAT1/BTG2/NT5C/PRKCA/FXR2/NT5C3B/PAIP1/NUDT15	58
BP	GO:0032206	positive regulation of telomere maintenance	11/1505	52/18723	0.00243434	0.0454409	0.0407117	CCT3/CCT2/TCP1/NEK2/MAPKAPK5/CCT5/CCT6A/DKC1/HNRNPD/CCT4/HNRNPA1	11
BP	GO:0042769	DNA damage response, detection of DNA damage	5/1505	13/18723	0.00247964	0.0461296	0.0413287	MRPS35/RPS3/SOX4/USP1/DNAJA1	5
BP	GO:0006301	postreplication repair	8/1505	31/18723	0.0025264	0.0468409	0.041966	WDR33/RCHY1/POLE2/MSH2/PCNA/NSMCE1/UBE2V2/POLD1	8
BP	GO:0043038	amino acid activation	10/1505	45/18723	0.00257833	0.0475508	0.042602	FARSB/RARS2/GATC/LARS2/QRSL1/CARS2/IARS2/DARS2/MARS2/SARS2	10
BP	GO:0051100	negative regulation of binding	24/1505	162/18723	0.00258202	0.0475508	0.042602	ACTB/SUMO1/KDM1A/PEX19/CAV1/ADRB2/NEK2/EIF4A3/DKK1/MEPCE/DTNBP1/ARHGAP28/MAPK8/GNL3L/SMO/SRI/TMBIM6/RACK1/HDAC2/STYX/CPNE1/DVL1/RALB/SYMPK	24
BP	GO:0016032	viral process	50/1505	415/18723	0.00261452	0.0479882	0.0429939	CD81/ITGB1/HSPA8/ITGB6/SSB/CAV1/EIF3D/TRIM11/EIF3G/HACD3/TRIM21/TARDBP/DHX9/TRIM28/SNF8/TOP2A/KPNA2/HSP90AB1/TRIM38/SLC3A2/LARP7/PARP9/CAV2/EIF3L/CALCOCO2/DDX3X/RAB43/TOP2B/CNOT7/TFRC/PPIA/PIK3C2G/CHD1/INSR/ST6GAL1/CXADR/ATG5/YTHDC2/FUT8/CDC42/SLC52A2/DDX6/SMARCB1/DENR/PPID/STAT1/CCNT2/PHB/SIVA1/CXCR6	50
BP	GO:0045088	regulation of innate immune response	30/1505	218/18723	0.0026382	0.0482371	0.0432168	NMI/CASP8/USP15/PTPN6/LYAR/MATR3/ERAP1/ZBP1/ZCCHC3/TRIM21/DHX9/RPS19/IFI35/HSP90AB1/NONO/PARP9/MAP3K7/SFPQ/CNOT7/PAK1/XRCC6/HMGB2/POLR3D/PSPC1/YTHDF2/SRC/PTPN11/COCH/APPL1/LSM14A	30
BP	GO:0006405	RNA export from nucleus	15/1505	84/18723	0.00264566	0.0482371	0.0432168	SSB/DHX9/TPR/SRSF3/NPM1/DDX39B/FYTTD1/CPSF6/THOC3/AGFG1/NUP93/NUP62/IWS1/THOC7/HNRNPA1	15
BP	GO:0006476	protein deacetylation	17/1505	101/18723	0.00274355	0.0498563	0.0446676	SIRT1/MIER1/SMARCAD1/MORF4L2/SIRT5/SFPQ/MAPK8/MSL3/NCAPG2/TBL1XR1/HDAC2/JDP2/SPRED1/SPHK2/PHB/HDAC5/MORF4L1	17
CC	GO:0044391	ribosomal subunit	72/1545	180/19550	5.2295e-33	3.44101e-30	2.69732e-30	RPL21/RPS18/RPLP0/RPL24/RPL35A/MRPS22/RPL5/RPS8/MRPL32/MRPS35/MRPL51/RPL3/RPL9/MRPS18C/MRPL34/RPS14/MRPL22/MRPL50/RPS12/RPS29/RPS27A/RPL35/RPL12/RPS21/RPS3/RPL22/RPS3A/RPS19/RPL18/RPS11/RPS5/RPL23A/RPL23/RPL19/RPL27/MRPL12/RPL10A/RPS24/MRPL49/RPL36A/RPL31/RPL6/MRPL9/RPS26/RPS20/NPM1/RPL11/MRPL14/MTERF4/RPS2/RPL15/RPLP2/DAP3/MRPL24/RPS15/RACK1/MRPL3/RPL18A/UBA52/RPS7/MRPL13/RPS25/RPL13/RPS16/RPL13…	72
CC	GO:0005840	ribosome	81/1545	240/19550	7.87254e-31	2.59007e-28	2.03029e-28	RPL21/RPS18/RPLP0/RPL24/RPL35A/RPL22L1/MRPS22/RPL5/RPS8/MRPL32/MRPS35/MRPL51/RPL3/RPL9/MRPS18C/MRPL34/EEF2/RPS14/MRPL22/MRPL50/RPS12/APEX1/RPS29/RPS27A/PTCD3/RPL35/RPL12/RPS21/RPS3/RPL22/DHX9/RPS3A/RPS19/RPL18/RPS11/RPS5/RPL23A/RPL23/RPL19/RPL27/MRPL12/RPL10A/CHCHD1/RPS24/MRPL49/RPL36A/RPL31/RPL6/MRPL9/RPS26/PNPT1/RPS20/NPM1/RPL11/MRPL14/MTERF4/RPS2/RPL15/RPLP2/DAP3/MRPL24/RPS15/RACK1/NCK1/MRPL3/…	81
CC	GO:0022626	cytosolic ribosome	52/1545	102/19550	1.7125e-30	3.75608e-28	2.94429e-28	RPL21/RPS18/RPLP0/RPL24/RPL35A/RPL5/RPS8/RPL3/RPL9/RPS14/RPS12/RPS29/RPS27A/RPL35/RPL12/RPS21/RPS3/RPL22/RPS3A/RPS19/RPL18/RPS11/RPS5/RPL23A/RPL23/RPL19/RPL27/RPL10A/RPS24/RPL36A/RPL31/RPL6/RPS26/RPS20/RPL11/RPS2/RPL15/RPLP2/RPS15/RPL18A/UBA52/RPS7/RPS25/RPL13/RPS16/RPL13A/RPL28/RPS9/FXR2/RPL29/RPL32/RPL14	52
CC	GO:0015934	large ribosomal subunit	46/1545	113/19550	6.26466e-22	1.03054e-19	8.07812e-20	RPL21/RPLP0/RPL24/RPL35A/RPL5/MRPL32/MRPL51/RPL3/RPL9/MRPL34/MRPL22/MRPL50/RPL35/RPL12/RPL22/RPL18/RPL23A/RPL23/RPL19/RPL27/MRPL12/RPL10A/MRPL49/RPL36A/RPL31/RPL6/MRPL9/NPM1/RPL11/MRPL14/MTERF4/RPL15/RPLP2/MRPL24/MRPL3/RPL18A/UBA52/MRPL13/RPL13/RPL13A/RPL28/FXR2/MRPS30/RPL29/RPL32/RPL14	46
CC	GO:0022625	cytosolic large ribosomal subunit	31/1545	58/19550	1.63531e-19	2.15207e-17	1.68695e-17	RPL21/RPLP0/RPL24/RPL35A/RPL5/RPL3/RPL9/RPL35/RPL12/RPL22/RPL18/RPL23A/RPL23/RPL19/RPL27/RPL10A/RPL36A/RPL31/RPL6/RPL11/RPL15/RPLP2/RPL18A/UBA52/RPL13/RPL13A/RPL28/FXR2/RPL29/RPL32/RPL14	31
CC	GO:0022627	cytosolic small ribosomal subunit	22/1545	42/19550	5.3605e-14	5.87868e-12	4.60815e-12	RPS18/RPS8/RPS14/RPS12/RPS29/RPS27A/RPS21/RPS3/RPS3A/RPS19/RPS11/RPS5/RPS24/RPS26/RPS20/RPS2/RPS15/UBA52/RPS7/RPS25/RPS16/RPS9	22
CC	GO:0015935	small ribosomal subunit	28/1545	71/19550	1.7744e-13	1.66793e-11	1.30745e-11	RPS18/MRPS22/RPS8/MRPS35/MRPS18C/RPS14/RPS12/RPS29/RPS27A/RPS21/RPS3/RPS3A/RPS19/RPS11/RPS5/RPS24/RPS26/RPS20/NPM1/RPS2/DAP3/RPS15/RACK1/UBA52/RPS7/RPS25/RPS16/RPS9	28
CC	GO:0005925	focal adhesion	78/1545	418/19550	6.57503e-13	5.40796e-11	4.23917e-11	RPS18/CAPN1/CD81/ITGB1/HSPA8/RPLP0/ACTB/ITGB6/RND3/TADA1/DDR2/RPL5/RPS8/CAP1/ITGB8/CAV1/RPL3/RPL9/RPS14/DCTN4/HACD3/RPS29/RPL12/STX16/RPS3/CAT/RPL22/RPS3A/RPS19/RPL18/RPS11/RPS5/RPL23/RPL19/RPL27/FLNB/RPL10A/PDLIM1/RPL31/RPL6/CAV2/NPM1/FAT1/PTK7/TRIP6/RPS2/RHOU/RPLP2/PAK1/ZNF185/NEXN/CNN3/PPIA/TWF1/MME/CDC42EP1/LAP3/ADD1/ARHGAP26/RPS15/DNM2/HNRNPK/PALLD/RPS7/FERMT2/ADAM10/EFS/CDC42/ACTR2/YWHAQ/AR…	78
CC	GO:0030055	cell-substrate junction	78/1545	425/19550	1.59074e-12	1.16301e-10	9.11651e-11	RPS18/CAPN1/CD81/ITGB1/HSPA8/RPLP0/ACTB/ITGB6/RND3/TADA1/DDR2/RPL5/RPS8/CAP1/ITGB8/CAV1/RPL3/RPL9/RPS14/DCTN4/HACD3/RPS29/RPL12/STX16/RPS3/CAT/RPL22/RPS3A/RPS19/RPL18/RPS11/RPS5/RPL23/RPL19/RPL27/FLNB/RPL10A/PDLIM1/RPL31/RPL6/CAV2/NPM1/FAT1/PTK7/TRIP6/RPS2/RHOU/RPLP2/PAK1/ZNF185/NEXN/CNN3/PPIA/TWF1/MME/CDC42EP1/LAP3/ADD1/ARHGAP26/RPS15/DNM2/HNRNPK/PALLD/RPS7/FERMT2/ADAM10/EFS/CDC42/ACTR2/YWHAQ/AR…	78
CC	GO:0098687	chromosomal region	67/1545	348/19550	6.61544e-12	4.35296e-10	3.41217e-10	SSB/KDM1A/CDCA8/CENPM/GAR1/NCAPG/CSNK1A1/DCTN4/PINX1/NUP43/APEX1/BUB1B/MSH2/PCNA/TPR/NSL1/PPP2R5A/NEK2/CHEK2/TOP2A/BIRC5/CENPH/CCNB1/MCM3/SKA1/KIF22/MCM7/HELLS/CENPF/NSMCE3/SMCHD1/NUF2/LRWD1/NSMCE1/ZWINT/WRN/KMT5B/DYNLT3/PHF6/MCM2/MCM5/NCAPD2/SUN2/RANGAP1/XRCC6/MAD2L1/UHRF2/KAT2B/THOC3/XPO1/DNMT3A/DSCC1/MCM4/NCAPD3/AHCTF1/SGO2/CDT1/MCM6/ORC4/POLD1/TEN1/RAD51D/KANSL1/FBXW11/BOD1/TP53BP1/THOC7	67
CC	GO:0042788	polysomal ribosome	17/1545	32/19550	3.02209e-11	1.80776e-09	1.41706e-09	RPL24/EEF2/RPS29/RPS21/DHX9/RPL18/RPL19/RPL10A/RPL36A/RPL31/RPL6/RPS26/PNPT1/RPL11/RPL18A/EIF3H/RPL32	17
CC	GO:0005844	polysome	24/1545	66/19550	7.16903e-11	3.93102e-09	3.08143e-09	RPL24/FXR1/EEF2/RPS29/EIF2S1/RPS21/RPS3/DHX9/DRG1/RPL18/RPL19/RPL10A/RPL36A/RPL31/RPL6/RPS26/PNPT1/RPL11/IMPACT/AGO1/RPL18A/EIF3H/FXR2/RPL32	24
CC	GO:0005759	mitochondrial matrix	80/1545	480/19550	1.23792e-10	6.26576e-09	4.91157e-09	DIMT1/TRMT10C/MRPS22/PCCB/FASTKD1/HSPE1/NDUFS1/MRPL32/GSTK1/TST/MRPS35/MRPL51/MRPS18C/MRPL34/TIMM44/MRPL22/MRPL50/RARS2/HADHB/HADHA/TRUB2/LACTB2/DECR1/RPS3/TFB2M/ABCE1/MRPL12/CCNB1/ETFA/MCEE/LARS2/TYMS/PRDX3/CHCHD1/SDHAF2/PRDX5/MRPL49/HSD17B10/DDX28/MRPL9/ACSS3/PNPT1/BCKDK/SUCLG2/MRPL14/SIRT5/ME2/DTYMK/MTERF4/TUFM/TRAP1/OAT/PPIF/IDH3G/DAP3/MRPL24/MCCC1/NDUFS7/ALKBH7/MRPL3/FXN/BTD/FOXO3/LRPPRC/CAR…	80
CC	GO:0005681	spliceosomal complex	42/1545	191/19550	9.10185e-10	4.27787e-08	3.35331e-08	RHEB/HSPA8/CWC22/SNRNP40/LSM5/LSM8/RBM28/ZCRB1/MAGOHB/CDC40/HNRNPC/SNRPB2/API5/PLRG1/LSM6/SNRPD2/EIF4A3/RBM5/CCDC12/CDC5L/CLNS1A/RBM3/PRPF38B/DHX15/SNRNP48/DDX39B/TXNL4A/LUC7L/BUD31/SMNDC1/DDX23/HNRNPM/HNRNPH1/U2AF1/HNRNPK/SYNCRIP/HNRNPR/SNRPB/HNRNPA1/HNRNPF/SF3B1/SRSF1	42
CC	GO:0000779	condensed chromosome, centromeric region	35/1545	144/19550	1.38233e-09	6.06382e-08	4.75327e-08	CENPM/NCAPG/CSNK1A1/DCTN4/PINX1/NUP43/BUB1B/TPR/NSL1/NEK2/BIRC5/CENPH/CCNB1/SKA1/KIF22/CENPF/NUF2/LRWD1/ZWINT/KMT5B/DYNLT3/PHF6/NCAPD2/RANGAP1/MAD2L1/KAT2B/XPO1/NCAPD3/AHCTF1/SGO2/CDT1/KANSL1/FBXW11/BOD1/TP53BP1	35
CC	GO:0000775	chromosome, centromeric region	42/1545	198/19550	2.87869e-09	1.18386e-07	9.27999e-08	CDCA8/CENPM/NCAPG/CSNK1A1/DCTN4/PINX1/NUP43/BUB1B/TPR/NSL1/PPP2R5A/NEK2/TOP2A/BIRC5/CENPH/CCNB1/SKA1/KIF22/HELLS/CENPF/NUF2/LRWD1/ZWINT/KMT5B/DYNLT3/PHF6/NCAPD2/RANGAP1/MAD2L1/UHRF2/KAT2B/XPO1/DNMT3A/DSCC1/NCAPD3/AHCTF1/SGO2/CDT1/KANSL1/FBXW11/BOD1/TP53BP1	42
CC	GO:0016607	nuclear speck	68/1545	412/19550	4.64284e-09	1.79705e-07	1.40866e-07	MEF2C/SON/EAF2/CWC22/SUMO1/SNRNP40/RCHY1/CSNK1A1/CDC40/NUP43/APEX1/RBM25/SRSF7/PPP4R3B/SNRPB2/API5/TARDBP/NSL1/PLRG1/EIF4A3/AK6/UNC45A/SRSF3/CDC5L/KIF22/RBM4/NONO/DHX15/ZNF638/NPM1/CD2BP2/CARMIL1/TAP2/DDX39B/PIAS2/RNPS1/SMNDC1/SFPQ/GTF2E2/CNOT7/WRN/TAF5L/FYTTD1/NCAPG2/CDK13/STK17A/CPSF6/BRD1/U2AF1/EAF1/PIAS1/THOC3/TCF12/HP1BP3/REXO4/PSPC1/PPP1R16B/SRSF6/TRIP12/ZBTB16/CCNL2/MSL1/HDAC5/PPP4R3A/MORF…	68
CC	GO:0001650	fibrillar center	33/1545	140/19550	9.2297e-09	3.37397e-07	2.64477e-07	SIRT1/WDR33/SELENBP1/GAR1/TIMM44/WDR43/SNRPB2/RPP38/PLRG1/PRMT7/TAX1BP3/UTP15/IP6K1/CHCHD1/NONO/EIF3L/TAF4B/CD2BP2/RNMT/HEATR1/HERC4/ESRRA/DKC1/USO1/PSPC1/NOP56/MTDH/NOP58/SMARCB1/UTP4/ACACA/UBTF/CDK7	33
CC	GO:0000793	condensed chromosome	46/1545	244/19550	2.58001e-08	8.93497e-07	7.0039e-07	NIFK/CENPM/NCAPG/CSNK1A1/DCTN4/PINX1/NUP43/BUB1B/TPR/NSL1/NEK2/TOP2A/PSMC3IP/BIRC5/CENPH/CCNB1/SKA1/KIF22/MKI67/SMC2/CENPF/NSMCE3/NUF2/LRWD1/NSMCE1/UBE2I/ZWINT/KMT5B/DYNLT3/PHF6/NCAPD2/SUN2/RANGAP1/MAD2L1/HMGB2/KAT2B/LRPPRC/XPO1/NCAPD3/AHCTF1/SGO2/CDT1/KANSL1/FBXW11/BOD1/TP53BP1	46
CC	GO:0000776	kinetochore	31/1545	134/19550	4.10088e-08	1.34919e-06	1.05759e-06	CENPM/CSNK1A1/DCTN4/PINX1/NUP43/BUB1B/TPR/NSL1/NEK2/BIRC5/CENPH/CCNB1/SKA1/KIF22/CENPF/NUF2/LRWD1/ZWINT/DYNLT3/PHF6/RANGAP1/MAD2L1/KAT2B/XPO1/AHCTF1/SGO2/CDT1/KANSL1/FBXW11/BOD1/TP53BP1	31
CC	GO:0030684	preribosome	22/1545	78/19550	9.19585e-08	2.88137e-06	2.25863e-06	EMG1/WDR36/LTV1/UTP18/FTSJ3/WDR74/UTP14A/NOP9/WDR12/WDR46/BYSL/RSL1D1/HEATR1/EBNA1BP2/RRP7A/PWP2/RPS7/WDR37/NOP56/BOP1/NOP58/UTP4	22
CC	GO:0071013	catalytic step 2 spliceosome	23/1545	87/19550	1.74247e-07	5.21158e-06	4.08523e-06	CWC22/SNRNP40/MAGOHB/CDC40/HNRNPC/SNRPB2/PLRG1/SNRPD2/EIF4A3/CDC5L/BUD31/DDX23/HNRNPM/HNRNPH1/U2AF1/HNRNPK/SYNCRIP/HNRNPR/SNRPB/HNRNPA1/HNRNPF/SF3B1/SRSF1	23
CC	GO:0072686	mitotic spindle	32/1545	161/19550	9.95059e-07	2.84673e-05	2.23148e-05	RACGAP1/KATNA1/HAUS4/NUSAP1/TPX2/RMDN1/RPS3/TPR/SKA1/KIF22/KIF11/FAM161A/KIFC1/KIF20B/EML3/DYNLT3/CDC16/GPSM2/YEATS2/TBL1XR1/RANGAP1/MAD2L1/TACC3/NIN/KATNBL1/CDC42/MAPRE1/NUP62/NCOR1/CDC27/TAF1D/LSM14A	32
CC	GO:0005743	mitochondrial inner membrane	69/1545	495/19550	2.64313e-06	7.24658e-05	5.68041e-05	SDHD/TIMMDC1/NDUFB5/MRPS22/NDUFV3/NDUFS1/MRPL32/NDUFA12/SLC25A3/MRPS35/MRPL51/MRPS18C/MRPL34/TIMM44/HIGD2A/MRPL22/MRPL50/NDUFAF4/COQ6/PTCD3/HADHB/HADHA/TIMM8B/RPS3/NDUFC1/MRPL12/NDUFAF2/TYMS/TMEM186/CHCHD1/MRPL49/MRPL9/SFXN5/SLC25A16/ACAD9/EXOG/MRPL14/TRAP1/NDUFB10/SFXN4/MCU/TIMM8A/CPT2/DAP3/MRPL24/NOA1/NDUFS7/MRPL3/SLC27A1/MICU2/SLC25A15/CRLS1/SRC/MRPL13/TMEM65/NDUFB9/PTPMT1/SLC25A33/HSPD1/TOMM4…	69
CC	GO:0098798	mitochondrial protein complex	43/1545	268/19550	6.49431e-06	0.00017093	0.000133988	SDHD/TRMT10C/NDUFB5/MRPS22/NDUFV3/NDUFS1/MRPL32/NDUFA12/MRPS35/MRPL51/TOMM22/MRPS18C/MRPL34/MRPL22/TOMM5/MRPL50/HADHA/TIMM8B/NDUFC1/MRPL12/MRPL49/HSD17B10/MRPL9/PNPT1/BCKDK/SUCLG2/TOMM6/MRPL14/MTERF4/NDUFB10/PPIF/MCU/DAP3/MRPL24/MCCC1/NDUFS7/MRPL3/MICU2/MRPL13/NDUFB9/TOMM40/PHB/MRPS30	43
CC	GO:0000228	nuclear chromosome	38/1545	227/19550	8.1076e-06	0.000205185	0.000160839	NIFK/PRIM1/SMARCAD1/PINX1/POLE2/PCNA/TARDBP/DHX9/NEK2/TOP2A/PSMC3IP/BIRC5/MCM3/MCM7/SFR1/SMC2/SMCHD1/LRWD1/UBE2I/MCM2/POLD2/CPSF6/MCM5/NCAPD2/SUN2/HDAC2/LRPPRC/CSNK2A1/MCM4/TONSL/UCHL5/SMARCB1/MCM6/ORC4/POLD1/YY1/MORF4L1/PBRM1	38
CC	GO:0031261	DNA replication preinitiation complex	7/1545	12/19550	1.05485e-05	0.000257072	0.000201512	MCM3/MCM7/MCM2/CDC45/MCM5/MCM4/MCM6	7
CC	GO:0061695	transferase complex, transferring phosphorus-containing groups	39/1545	239/19550	1.14933e-05	0.000270092	0.000211718	CDK2/ACVR2A/CKS1B/PIK3R3/PRIM1/POLR3H/CKS2/POLE2/GTF2A2/CCNB2/SOCS4/PCNA/TAF9/CCNB1/POLR1C/MCM3/PIK3C3/TAF4B/TAF8/POLR3E/CHUK/GTF2E2/TAF5L/CCND1/CDK13/POLD2/PIK3CA/PIK3C2G/CCNG1/INSR/POLR3D/GTF2A1/POLR1A/TCEA1/PHKB/CCNT2/POLD1/PRPSAP2/CDK7	39
CC	GO:0035770	ribonucleoprotein granule	40/1545	254/19550	2.10231e-05	0.000477007	0.000373914	RPLP0/ACTB/FXR1/MBNL1/FASTKD1/SUMO1/PUM1/PSMA2/EIF2S1/TRUB2/SNRPB2/TRIM21/TARDBP/RC3H1/DHX9/LSM6/ENDOV/RBM4/RPL6/DDX28/EID1/CNOT1/DDX3X/AGO1/CNOT7/PABPC4/TAF5L/LARP4/EIF4E/HNRNPK/YTHDC2/CDC42/DDX1/YTHDF2/DDX6/SYMPK/RPL28/FXR2/KPNB1/LSM14A	40
CC	GO:0000313	organellar ribosome	19/1545	84/19550	2.33759e-05	0.000496172	0.000388937	MRPS22/MRPL32/MRPS35/MRPL51/MRPS18C/MRPL34/MRPL22/MRPL50/MRPL12/CHCHD1/MRPL49/MRPL9/MRPL14/MTERF4/DAP3/MRPL24/MRPL3/MRPL13/MRPS30	19
CC	GO:0005761	mitochondrial ribosome	19/1545	84/19550	2.33759e-05	0.000496172	0.000388937	MRPS22/MRPL32/MRPS35/MRPL51/MRPS18C/MRPL34/MRPL22/MRPL50/MRPL12/CHCHD1/MRPL49/MRPL9/MRPL14/MTERF4/DAP3/MRPL24/MRPL3/MRPL13/MRPS30	19
CC	GO:0031248	protein acetyltransferase complex	19/1545	85/19550	2.79011e-05	0.000556331	0.000436094	ACTB/ATF2/TADA1/TAF9/MORF4L2/EPC2/OGT/NAA50/TAF5L/MSL3/YEATS4/BRD1/KAT2B/NAA30/NAA15/TADA2A/MSL1/KANSL1/MORF4L1	19
CC	GO:1902493	acetyltransferase complex	19/1545	85/19550	2.79011e-05	0.000556331	0.000436094	ACTB/ATF2/TADA1/TAF9/MORF4L2/EPC2/OGT/NAA50/TAF5L/MSL3/YEATS4/BRD1/KAT2B/NAA30/NAA15/TADA2A/MSL1/KANSL1/MORF4L1	19
CC	GO:1904813	ficolin-1-rich granule lumen	24/1545	124/19550	3.41962e-05	0.000661796	0.000518765	CAPN1/HSPA8/HSPA6/ILF2/PSMA2/CAND1/LTA4H/EEF2/ALAD/EEF1A1/CAT/ACLY/HSP90AB1/IMPDH2/DDX3X/PSMA5/CDK13/PPIA/DERA/XRCC6/ACTR2/ALDOC/KPNB1/APEH	24
CC	GO:0071162	CMG complex	6/1545	10/19550	3.83621e-05	0.000721208	0.000565337	MCM3/MCM7/MCM2/MCM5/MCM4/MCM6	6
CC	GO:0005819	spindle	54/1545	391/19550	4.06175e-05	0.000742397	0.000581946	TUBGCP5/PSRC1/CDCA8/RACGAP1/KIF20A/DCTN4/PINX1/KATNA1/HAUS4/BUB1B/NUSAP1/CALM2/TPX2/RMDN1/RPS3/TPR/NEK2/SPATA5/BIRC5/CCNB1/SKA1/KIF22/KIF11/FAM161A/CENPF/PLK4/NPM1/KIFC1/KIF20B/EML3/DYNLT3/SPECC1L/CDC16/GPSM2/YEATS2/TBL1XR1/RANGAP1/MAD2L1/TACC3/NIN/KATNBL1/BIRC6/CDC42/CKAP2/KIF16B/MAPRE1/DCUN1D5/NUP62/NCOR1/CDC27/BOD1/VRK1/TAF1D/LSM14A	54
CC	GO:0030686	90S preribosome	10/1545	29/19550	4.57153e-05	0.000791597	0.000620512	WDR36/UTP18/NOP9/WDR12/RSL1D1/HEATR1/RRP7A/PWP2/BOP1/UTP4	10
CC	GO:0101031	chaperone complex	10/1545	29/19550	4.57153e-05	0.000791597	0.000620512	HSPA8/CCT3/CCT2/TCP1/CCT5/HSP90AB1/DNAJC9/STIP1/CCT6A/CCT4	10
CC	GO:0005849	mRNA cleavage factor complex	8/1545	19/19550	5.11496e-05	0.000862985	0.000676472	WDR33/FIP1L1/CSTF1/NUDT21/PCF11/CPSF4/CPSF6/SYMPK	8
CC	GO:0000315	organellar large ribosomal subunit	14/1545	54/19550	5.57681e-05	0.00089501	0.000701576	MRPL32/MRPL51/MRPL34/MRPL22/MRPL50/MRPL12/MRPL49/MRPL9/MRPL14/MTERF4/MRPL24/MRPL3/MRPL13/MRPS30	14
CC	GO:0005762	mitochondrial large ribosomal subunit	14/1545	54/19550	5.57681e-05	0.00089501	0.000701576	MRPL32/MRPL51/MRPL34/MRPL22/MRPL50/MRPL12/MRPL49/MRPL9/MRPL14/MTERF4/MRPL24/MRPL3/MRPL13/MRPS30	14
CC	GO:0000781	chromosome, telomeric region	28/1545	162/19550	6.77353e-05	0.00106045	0.000831263	SSB/KDM1A/GAR1/PINX1/APEX1/MSH2/PCNA/CHEK2/MCM3/MCM7/NSMCE3/SMCHD1/LRWD1/NSMCE1/WRN/MCM2/MCM5/SUN2/XRCC6/THOC3/MCM4/MCM6/ORC4/POLD1/TEN1/RAD51D/TP53BP1/THOC7	28
CC	GO:0033290	eukaryotic 48S preinitiation complex	7/1545	15/19550	6.93002e-05	0.00106045	0.000831263	EIF3D/EIF3G/EIF2S1/EIF3E/EIF3K/EIF3L/EIF3H	7
CC	GO:0010494	cytoplasmic stress granule	17/1545	76/19550	7.19284e-05	0.00107566	0.000843179	MBNL1/PUM1/EIF2S1/TARDBP/RC3H1/ENDOV/RBM4/DDX3X/PABPC4/LARP4/EIF4E/HNRNPK/DDX1/YTHDF2/DDX6/KPNB1/LSM14A	17
CC	GO:0005832	chaperonin-containing T-complex	6/1545	11/19550	7.87343e-05	0.00115127	0.000902452	CCT3/CCT2/TCP1/CCT5/CCT6A/CCT4	6
CC	GO:0120114	Sm-like protein family complex	21/1545	111/19550	0.000144912	0.00207287	0.00162487	SNRNP40/LSM5/LSM8/SNRPB2/LSM6/SNRPD2/CLNS1A/LARP7/CD2BP2/MEPCE/DDX39B/TXNL4A/LUC7L/DDX23/STRAP/LSM11/GEMIN5/SNRPB/TGS1/ARFGEF1/SF3B1	21
CC	GO:0032040	small-subunit processome	11/1545	39/19550	0.000152881	0.00214034	0.00167776	EMG1/WDR36/UTP18/UTP14A/WDR46/HEATR1/PWP2/RPS7/NOP56/NOP58/UTP4	11
CC	GO:0000123	histone acetyltransferase complex	16/1545	75/19550	0.000209353	0.00286988	0.00224963	ACTB/ATF2/TADA1/TAF9/MORF4L2/EPC2/OGT/TAF5L/MSL3/YEATS4/BRD1/KAT2B/TADA2A/MSL1/KANSL1/MORF4L1	16
CC	GO:0005635	nuclear envelope	59/1545	468/19550	0.000240388	0.00322807	0.0025304	MGST3/SIRT1/SUMO1/NUP205/TMEM33/LMNB1/MATR3/CETN3/NUP43/HACD3/FANCL/TPR/PLRG1/INTS2/UTP18/IPO11/CENPF/MGST2/TXNL4A/UBE2I/AGPAT5/CCND1/PAK1/CC2D1B/NDC1/RANBP1/INTS1/CEPT1/YEATS4/TMPO/SUN2/RANGAP1/MAD2L1/LMNB2/INSR/LRPPRC/RTN4/VRK2/XPO1/ANXA4/IPO5/CPNE1/CSE1L/MTDH/LYPLA1/AGFG1/IPO7/AHCTF1/TOR3A/SLC30A1/NUP93/DPY19L3/NUP62/ARL6IP6/SYNE4/KPNB1/FBXW11/CLMN/APEH	59
CC	GO:0005684	U2-type spliceosomal complex	18/1545	92/19550	0.00027347	0.00357827	0.00280491	CWC22/SNRNP40/LSM5/LSM8/MAGOHB/CDC40/SNRPB2/PLRG1/LSM6/SNRPD2/EIF4A3/CCDC12/CDC5L/TXNL4A/LUC7L/BUD31/SNRPB/SF3B1	18
CC	GO:0070993	translation preinitiation complex	7/1545	18/19550	0.000277343	0.00357827	0.00280491	EIF3D/EIF3G/EIF2S1/EIF3E/EIF3K/EIF3L/EIF3H	7
CC	GO:0000307	cyclin-dependent protein kinase holoenzyme complex	11/1545	42/19550	0.000313302	0.00396448	0.00310765	CDK2/CKS1B/CKS2/CCNB2/PCNA/CCNB1/CCND1/CDK13/CCNG1/CCNT2/CDK7	11
CC	GO:0005732	small nucleolar ribonucleoprotein complex	9/1545	30/19550	0.000365194	0.00444996	0.00348821	SNRNP40/GAR1/RPP38/LSM6/POP5/POP7/DKC1/NOP56/NOP58	9
CC	GO:0071007	U2-type catalytic step 2 spliceosome	9/1545	30/19550	0.000365194	0.00444996	0.00348821	CWC22/SNRNP40/CDC40/SNRPB2/PLRG1/SNRPD2/CDC5L/BUD31/SNRPB	9
CC	GO:0000151	ubiquitin ligase complex	41/1545	301/19550	0.000436372	0.00522059	0.00409229	ANAPC13/CKS1B/CAND1/RCHY1/FBXO38/CKS2/BUB1B/MED6/DCAF4/KBTBD7/CUL5/PLRG1/DERL2/DCAF11/UBR3/APPBP2/PCGF6/CUL7/TRAF7/PCGF5/CDC16/CUL1/MKLN1/KLHL24/DCUN1D1/RBX1/ARMC8/KEAP1/KLHDC1/ARIH1/RMND5A/RBCK1/UBE2C/DCUN1D5/UBE2S/CBX2/MED24/CDC27/FBXW11/PDCD6/OTULIN	41
CC	GO:0036464	cytoplasmic ribonucleoprotein granule	34/1545	236/19550	0.000473363	0.00556202	0.00435993	RPLP0/ACTB/FXR1/MBNL1/PUM1/PSMA2/EIF2S1/SNRPB2/TRIM21/TARDBP/RC3H1/DHX9/LSM6/ENDOV/RBM4/RPL6/EID1/CNOT1/DDX3X/AGO1/CNOT7/PABPC4/TAF5L/LARP4/EIF4E/HNRNPK/CDC42/DDX1/YTHDF2/DDX6/RPL28/FXR2/KPNB1/LSM14A	34
CC	GO:0005839	proteasome core complex	7/1545	20/19550	0.000586947	0.00677563	0.00531125	PSMA2/PSMA3/PSMB3/PSMB9/PSMB8/PSMA5/PSMB10	7
CC	GO:1902562	H4 histone acetyltransferase complex	9/1545	32/19550	0.000619901	0.00703267	0.00551273	ACTB/ATF2/MORF4L2/EPC2/MSL3/YEATS4/MSL1/KANSL1/MORF4L1	9
CC	GO:0005847	mRNA cleavage and polyadenylation specificity factor complex	6/1545	15/19550	0.000646804	0.00709328	0.00556024	WDR33/FIP1L1/NUDT21/CPSF4/CPSF6/SYMPK	6
CC	GO:0005852	eukaryotic translation initiation factor 3 complex	6/1545	15/19550	0.000646804	0.00709328	0.00556024	EIF3D/EIF3G/EIF3E/EIF3K/EIF3L/EIF3H	6
CC	GO:0000502	proteasome complex	13/1545	60/19550	0.000686152	0.00721468	0.0056554	PSMA2/PSME2/PSMA3/PSMD9/PSMB3/PSMB9/PSMD10/PSMB8/PSMA5/PSME1/UCHL5/PSMB10/UBE3A	13
CC	GO:0005657	replication fork	13/1545	60/19550	0.000686152	0.00721468	0.0056554	RFC4/PRIM1/SMARCAD1/PCNA/RAD51C/MCM3/WRN/POLD2/UHRF1/TONSL/POLD1/RAD51D/TP53BP1	13
CC	GO:1905368	peptidase complex	18/1545	99/19550	0.000690767	0.00721468	0.0056554	TADA1/PSMA2/PSME2/PSMA3/PSMD9/PSMB3/TAF9/PSMB9/PSMD10/PSMB8/TAF5L/PSMA5/KAT2B/PSME1/UCHL5/PSMB10/TADA2A/UBE3A	18
CC	GO:0030532	small nuclear ribonucleoprotein complex	18/1545	100/19550	0.000781326	0.00803301	0.00629687	SNRNP40/LSM5/LSM8/SNRPB2/LSM6/SNRPD2/LARP7/CD2BP2/MEPCE/DDX39B/TXNL4A/LUC7L/DDX23/LSM11/SNRPB/TGS1/ARFGEF1/SF3B1	18
CC	GO:0005680	anaphase-promoting complex	7/1545	21/19550	0.000820758	0.0083086	0.0065129	ANAPC13/BUB1B/CUL7/CDC16/UBE2C/UBE2S/CDC27	7
CC	GO:0031968	organelle outer membrane	32/1545	230/19550	0.00123894	0.0123518	0.00968229	RPS6KB1/QTRT2/ATF2/CASP8/MSTO1/PI4KB/TOMM22/THG1L/TOMM5/SYNJ2BP/RPS27A/HADHB/TOMM6/BPHL/AGPAT5/ARMCX3/MCL1/DNM1L/MGST1/BID/SLC25A46/UBA52/HINT2/SLC44A1/FOXO3/STARD7/LRPPRC/TOMM40/SYNE4/AKAP1/RHOT1/CLMN	32
CC	GO:0000152	nuclear ubiquitin ligase complex	10/1545	42/19550	0.00130399	0.0128064	0.0100386	ANAPC13/BUB1B/PCGF6/CUL7/PCGF5/CDC16/UBE2C/UBE2S/CBX2/CDC27	10
CC	GO:0016282	eukaryotic 43S preinitiation complex	6/1545	17/19550	0.00139373	0.0134863	0.0105716	EIF3D/EIF3G/EIF3E/EIF3K/EIF3L/EIF3H	6
CC	GO:0019867	outer membrane	32/1545	232/19550	0.00143076	0.013644	0.0106952	RPS6KB1/QTRT2/ATF2/CASP8/MSTO1/PI4KB/TOMM22/THG1L/TOMM5/SYNJ2BP/RPS27A/HADHB/TOMM6/BPHL/AGPAT5/ARMCX3/MCL1/DNM1L/MGST1/BID/SLC25A46/UBA52/HINT2/SLC44A1/FOXO3/STARD7/LRPPRC/TOMM40/SYNE4/AKAP1/RHOT1/CLMN	32
CC	GO:0000940	condensed chromosome outer kinetochore	5/1545	12/19550	0.00151309	0.0140227	0.010992	BUB1B/CCNB1/SKA1/CENPF/BOD1	5
CC	GO:0034709	methylosome	5/1545	12/19550	0.00151309	0.0140227	0.010992	PRMT5/SNRPD2/CLNS1A/WDR77/SNRPB	5
CC	GO:0000792	heterochromatin	14/1545	73/19550	0.00154479	0.0141177	0.0110665	SIRT1/SMARCAD1/TCP1/TRIM28/HELLS/LRWD1/TOP2B/MBD3/UHRF1/UHRF2/DNMT3A/NCAPD3/DDX6/CBX2	14
CC	GO:0005741	mitochondrial outer membrane	29/1545	205/19550	0.00158207	0.0142603	0.0111783	RPS6KB1/QTRT2/ATF2/CASP8/MSTO1/PI4KB/TOMM22/THG1L/TOMM5/SYNJ2BP/RPS27A/HADHB/TOMM6/BPHL/AGPAT5/ARMCX3/MCL1/DNM1L/MGST1/BID/SLC25A46/UBA52/HINT2/SLC44A1/FOXO3/STARD7/TOMM40/AKAP1/RHOT1	29
CC	GO:1905369	endopeptidase complex	13/1545	66/19550	0.00174409	0.0155083	0.0121566	PSMA2/PSME2/PSMA3/PSMD9/PSMB3/PSMB9/PSMD10/PSMB8/PSMA5/PSME1/UCHL5/PSMB10/UBE3A	13
CC	GO:1902555	endoribonuclease complex	8/1545	30/19550	0.00180816	0.0158636	0.0124351	TRMT10C/RPP38/DHX9/POP5/POP7/HSD17B10/AGO1/TSEN34	8
CC	GO:0005643	nuclear pore	15/1545	84/19550	0.00224739	0.0194576	0.0152524	SUMO1/NUP205/CETN3/NUP43/TPR/NDC1/RANBP1/RANGAP1/MAD2L1/IPO5/AGFG1/IPO7/NUP93/NUP62/KPNB1	15
CC	GO:0071011	precatalytic spliceosome	11/1545	53/19550	0.00249956	0.0213599	0.0167434	CWC22/LSM5/LSM8/MAGOHB/SNRPB2/LSM6/SNRPD2/PRPF38B/TXNL4A/SNRPB/SF3B1	11
CC	GO:0101002	ficolin-1-rich granule	26/1545	185/19550	0.00293846	0.0247886	0.0194311	CAPN1/HSPA8/HSPA6/ILF2/PSMA2/CAND1/LTA4H/EEF2/ALAD/EEF1A1/CD93/CAT/ACLY/GAA/HSP90AB1/IMPDH2/DDX3X/PSMA5/CDK13/PPIA/DERA/XRCC6/ACTR2/ALDOC/KPNB1/APEH	26
CC	GO:0034399	nuclear periphery	20/1545	130/19550	0.00300984	0.0250693	0.0196512	NUP205/LMNB1/MATR3/PCNA/TPR/NONO/CENPF/DDX39B/SFPQ/EBNA1BP2/YEATS4/UHRF1/HNRNPM/DNMT3A/PSPC1/KIN/AHCTF1/NUP93/YY1/ARFGEF1	20
CC	GO:0030496	midbody	27/1545	196/19550	0.00328459	0.0270157	0.021177	RAB8A/PSRC1/CDCA8/RACGAP1/KIF20A/KATNA1/NEK2/BIRC5/RAP2A/CENPF/PIK3C3/DTNBP1/KIF20B/URB2/EML3/LAP3/EXOC1/RACK1/SAFB/KEAP1/DNM2/KATNBL1/BIRC6/CDC42/RALB/NUP62/TTC19	27
CC	GO:0030677	ribonuclease P complex	5/1545	14/19550	0.00334622	0.0271829	0.021308	TRMT10C/RPP38/POP5/POP7/HSD17B10	5
CC	GO:0000922	spindle pole	24/1545	170/19550	0.00392459	0.0314925	0.0246861	TUBGCP5/PSRC1/DCTN4/KATNA1/CALM2/TPX2/RMDN1/NEK2/CCNB1/KIF11/FAM161A/CENPF/PLK4/NPM1/KIF20B/GPSM2/MAD2L1/TACC3/NIN/KATNBL1/BIRC6/CKAP2/NUP62/BOD1	24
CC	GO:1902554	serine/threonine protein kinase complex	14/1545	81/19550	0.00421927	0.0334491	0.0262199	CDK2/ACVR2A/CKS1B/CKS2/CCNB2/PCNA/CCNB1/CHUK/CCND1/CDK13/CCNG1/PHKB/CCNT2/CDK7	14
CC	GO:0031461	cullin-RING ubiquitin ligase complex	24/1545	172/19550	0.00456004	0.0351128	0.027524	ANAPC13/CKS1B/CAND1/FBXO38/CKS2/BUB1B/DCAF4/KBTBD7/CUL5/PLRG1/DCAF11/APPBP2/CUL7/CDC16/CUL1/KLHL24/RBX1/KEAP1/KLHDC1/UBE2C/UBE2S/CDC27/FBXW11/PDCD6	24
CC	GO:0005667	transcription factor complex	48/1545	413/19550	0.00458226	0.0351128	0.027524	KDM1A/MIER1/APEX1/GTF2A2/MED6/TRIM28/SNF8/TAF9/SUB1/PDLIM1/NONO/GTF3C6/BDP1/TAF4B/SOX4/TAF8/TCF4/SMAD2/SFPQ/GTF2E2/TAF5L/CCND1/ASCL2/RLIM/TFDP1/TBL1XR1/VDR/XRCC6/GEMIN5/MBD3/HDAC2/GTF2A1/TCF12/C1D/CSNK2A1/RBL1/TCEA1/ZBTB16/NAA15/RBL2/CBFB/GPS2/NCOR1/CDK7/MEF2A/YY1/TAF1D/MED17	48
CC	GO:0035267	NuA4 histone acetyltransferase complex	6/1545	21/19550	0.00464733	0.0351128	0.027524	ACTB/MORF4L2/EPC2/MSL3/YEATS4/MORF4L1	6
CC	GO:0043189	H4/H2A histone acetyltransferase complex	6/1545	21/19550	0.00464733	0.0351128	0.027524	ACTB/MORF4L2/EPC2/MSL3/YEATS4/MORF4L1	6
CC	GO:0030894	replisome	5/1545	15/19550	0.00469593	0.0351128	0.027524	PRIM1/PCNA/MCM3/POLD2/POLD1	5
CC	GO:0055029	nuclear DNA-directed RNA polymerase complex	16/1545	100/19550	0.00509705	0.0370826	0.0290681	PRIM1/POLR3H/GTF2A2/TAF9/POLR1C/MCM3/TAF4B/TAF8/POLR3E/GTF2E2/TAF5L/POLR3D/GTF2A1/POLR1A/TCEA1/CDK7	16
CC	GO:0071005	U2-type precatalytic spliceosome	10/1545	50/19550	0.00511352	0.0370826	0.0290681	CWC22/LSM5/LSM8/MAGOHB/SNRPB2/LSM6/SNRPD2/TXNL4A/SNRPB/SF3B1	10
CC	GO:0043596	nuclear replication fork	7/1545	28/19550	0.00512844	0.0370826	0.0290681	PRIM1/SMARCAD1/PCNA/MCM3/POLD2/TONSL/POLD1	7
CC	GO:0000428	DNA-directed RNA polymerase complex	16/1545	101/19550	0.0056236	0.0402209	0.0315282	PRIM1/POLR3H/GTF2A2/TAF9/POLR1C/MCM3/TAF4B/TAF8/POLR3E/GTF2E2/TAF5L/POLR3D/GTF2A1/POLR1A/TCEA1/CDK7	16
CC	GO:0005874	microtubule	49/1545	429/19550	0.00586823	0.0415193	0.0325459	TUBGCP5/DYNC1I2/CCT3/PSRC1/RACGAP1/CCT2/KIF20A/KATNA1/TCP1/HAUS4/NUSAP1/CALM2/TPX2/RMDN1/NEK2/BIRC5/CCT5/TBCC/SKA1/KIF22/KIF11/FAM161A/DYNC2H1/APPBP2/KIFC1/KLC4/CCT6A/CLIP2/KIF20B/EML3/DYNLT3/DNM1L/DNM2/SRPRB/REEP4/NIN/LRPPRC/CCT4/STMN1/HSPH1/CKAP2/KIF16B/MAPRE1/CLMP/DVL1/KIFC3/BAIAP2/FBXW11/BOD1	49
CC	GO:0005697	telomerase holoenzyme complex	6/1545	22/19550	0.00596921	0.0417844	0.0327538	GAR1/HNRNPC/GNL3L/DKC1/LSM11/SNRPB	6
CC	GO:0005911	cell-cell junction	55/1545	494/19550	0.00620041	0.042946	0.0336643	ITGB1/ACTB/CLDN8/CLDN12/STEAP1/TSPAN33/PTPN6/CDCA3/FAT2/GRHL2/KCNJ2/PDLIM1/PDZD11/FAT1/PTK7/BAIAP2L1/CLDN3/CCND1/PAK1/ARVCF/SPECC1L/PATJ/NEXN/CNN3/KLHL24/PIK3CA/TWF1/CDC42EP1/PDLIM5/ADD1/PDLIM4/NCK1/AMOTL2/CXADR/EPB41L4B/FERMT2/TMOD3/CGNL1/ADAM10/STRN/CDC42/VAMP5/SAPCD2/MTDH/TMEM65/OBSL1/CLMP/DDX6/SCN4B/KIFC3/MARVELD3/CADM4/SYMPK/BAIAP2/CDC42BPB	55
CC	GO:0031965	nuclear membrane	36/1545	297/19550	0.00678929	0.0465349	0.0364776	SIRT1/SUMO1/NUP205/LMNB1/MATR3/HACD3/TPR/PLRG1/INTS2/UTP18/TXNL4A/CCND1/PAK1/NDC1/INTS1/CEPT1/YEATS4/SUN2/RANGAP1/LMNB2/LRPPRC/XPO1/ANXA4/CPNE1/MTDH/LYPLA1/AHCTF1/SLC30A1/NUP93/DPY19L3/NUP62/ARL6IP6/SYNE4/KPNB1/CLMN/APEH	36
MF	GO:0003735	structural constituent of ribosome	69/1531	182/18368	1.34311e-28	1.3458e-25	1.18335e-25	RPL21/RPS18/RPLP0/RPL24/RPL35A/RPL22L1/MRPS22/RPL5/RPS8/MRPL32/MRPS35/MRPL51/RPL3/RPL9/MRPS18C/MRPL34/RPS14/MRPL22/RPS12/RPS29/SRBD1/RPS27A/RPL35/RPL12/RPS21/RPS3/RPL22/RPS3A/RPS19/RPL18/RPS11/RPS5/RPL23A/RPL23/RPL19/RPL27/MRPL12/RPL10A/RPS24/MRPL49/RPL36A/RPL31/RPL6/MRPL9/RPS26/RPS20/RPL11/MRPL14/RPS2/RPL15/RPLP2/DAP3/MRPL24/RPS15/MRPL3/RPL18A/UBA52/RPS7/MRPL13/RPS25/RPL13/RPS16/RPL13A/RPL28/RPS…	69
MF	GO:0019843	rRNA binding	25/1531	68/18368	6.82697e-11	3.42031e-08	3.00746e-08	RPS18/RPLP0/RPL5/TST/EMG1/RPL9/MRPS18C/EEF2/RPS14/RPF2/PTCD3/RPL12/RPS3/RPS11/RPS5/RPL23A/RPL23/RPL19/DDX21/DDX28/GTF3A/NPM1/RPL11/MTERF4/RPS9	25
MF	GO:0042393	histone binding	50/1531	244/18368	1.99226e-09	6.65413e-07	5.85094e-07	SIRT1/CKS1B/NASP/USP15/CKS2/SBNO1/PRMT7/SUZ12/NPM3/DNAJC9/PARP9/USP16/ASF1B/NPM1/LRWD1/NAP1L4/MSL3/PHF6/MCM2/DTX3L/NCAPG2/YEATS2/NAP1L1/TBL1XR1/YEATS4/SMARCC2/NCAPD2/BRD1/CHD1/UHRF1/UHRF2/SMARCA2/PHIP/PHF10/PYGO1/MSH6/ZMYND11/ATAD2/TONSL/NCAPD3/IPO7/HINFP/STAT1/GRWD1/SPHK2/CBX2/MBTD1/TP53BP1/CHD2/VRK1	50
MF	GO:0004386	helicase activity	37/1531	156/18368	4.16378e-09	1.04303e-06	9.17127e-07	RFC4/DDX56/DDX47/SMARCAD1/DDX49/DHX9/SLFN11/EIF4A1/EIF4A3/MCM3/MCM7/HELLS/DDX50/DDX21/DDX28/DHX15/HLTF/DDX3X/DDX39B/WRN/MCM2/DDX23/MCM5/XRCC6/CHD1/SMARCA2/YTHDC2/DDX1/CHD6/DSCC1/MCM4/DDX6/DDX10/CHD9/MCM6/DDX52/CHD2	37
MF	GO:0140098	catalytic activity, acting on RNA	67/1531	386/18368	6.09386e-09	1.22121e-06	1.0738e-06	DIMT1/TRMT10C/QTRT2/METTL5/FARSB/ISG20L2/TYW3/NT5C3A/DDX56/METTL1/PRIM1/RTCB/DDX47/EMG1/POLR3H/DDX49/RARS2/MTFMT/APEX1/RPP38/LACTB2/TFB2M/DHX9/GATC/POP5/CMTR2/METTL16/EIF4A1/FTSJ3/ENDOV/EIF4A3/LARS2/POLR1C/POP7/DDX50/DDX21/DDX28/DHX15/PNPT1/CNOT1/MED20/MEPCE/DDX3X/EXOG/DDX39B/RNMT/POLR3E/CNOT7/DDX23/POLR3D/RNASEH1/QRSL1/YTHDC2/POLR1A/DDX1/CARS2/DTD1/XRN2/TGS1/DDX6/DDX10/IARS2/DARS2/MARS2/SARS2/TS…	67
MF	GO:0008094	DNA-dependent ATPase activity	28/1531	111/18368	7.76034e-08	1.29598e-05	1.13954e-05	RFC4/SMARCAD1/MSH2/DHX9/RAD51C/TOP2A/MCM3/MCM7/HELLS/HLTF/DDX3X/TOP2B/WRN/MCM2/MCM5/XRCC6/CHD1/SMARCA2/MSH6/DDX1/CHD6/DSCC1/MCM4/CHD9/MCM6/RAD51D/CDK7/CHD2	28
MF	GO:0043021	ribonucleoprotein complex binding	32/1531	149/18368	5.19814e-07	7.44077e-05	6.54262e-05	LTN1/NMD3/SERBP1/EEF2/PRMT5/EIF2S1/PTCD3/SNRPB2/DHX9/ABCE1/PRMT7/EIF3K/SNRPD2/EIF4A3/DERL2/RBM3/WDR12/NPM1/CD2BP2/DDX3X/IMPACT/PRMT3/PHF6/EIF4B/CPSF6/STRAP/GEMIN5/RACK1/SNRPB/BOP1/NAA15/C1QBP	32
MF	GO:0003712	transcription coregulator activity	72/1531	489/18368	1.4209e-06	0.000177968	0.000156486	BTG1/SIRT1/NMI/KDM1A/TADA1/MIER1/PFDN5/PRMT5/APEX1/COPS2/MED6/TRIM21/TFB2M/DHX9/PSMD9/URI1/TRIM28/PSMC3IP/TAF9/SUB1/TRIM38/PDLIM1/SFR1/EID1/MYCBP/PARP9/USP16/NPM1/MED20/PIAS2/KCTD1/BUD31/PPRC1/CNOT7/CITED4/TAF5L/ETS1/CCND1/RLIM/VGLL1/WDR77/PAWR/TBL1XR1/SMARCC2/NSD1/HMGB2/SMARCA2/KAT2B/PHF10/PIAS1/C1D/DNMT3A/DDX1/ZMYND11/NCOA5/MTDH/BTG2/SMARCB1/EWSR1/MED13L/TCF25/CBFB/TADA2A/C1QBP/GPS2/NCOR1/PHB/M…	72
MF	GO:0045182	translation regulator activity	29/1531	140/18368	3.76304e-06	0.000418952	0.000368382	EEF1B2/FXR1/EIF2B5/EIF3D/EIF3G/EEF2/RPS14/EEF1A1/EIF2S1/EIF2B4/MTRF1/EIF3E/RPL22/EIF3K/EIF4A1/EIF4A3/TYMS/EEF1G/EIF3L/TUFM/EEF2K/EIF4B/EIF4E/EIF3H/DENR/RPS9/FXR2/PAIP1/CNBP	29
MF	GO:0140097	catalytic activity, acting on DNA	40/1531	229/18368	5.8111e-06	0.000504964	0.000444012	RFC4/SMARCAD1/APEX1/POLE2/MSH2/MGME1/PCNA/RPS3/DHX9/RAD51C/TOP2A/ENDOV/MCM3/MCM7/HELLS/HLTF/DDX3X/EXOG/TOP2B/WRN/MUS81/MCM2/DKC1/MCM5/XRCC6/CHD1/SMARCA2/TDP1/MSH6/DNMT3A/DDX1/CHD6/DSCC1/MCM4/CHD9/MCM6/POLD1/RAD51D/CDK7/CHD2	40
MF	GO:0003727	single-stranded RNA binding	21/1531	87/18368	6.77715e-06	0.000504964	0.000444012	FXR1/SSB/HNRNPC/LACTB2/DHX9/ENDOV/EIF4A3/PNPT1/DDX3X/AGO1/PABPC4/EIF4B/LARP4/HNRNPDL/HNRNPH1/DDX1/STRBP/CNBP/HNRNPA1/HNRNPF/LSM14A	21
MF	GO:0051082	unfolded protein binding	26/1531	122/18368	6.84382e-06	0.000504964	0.000444012	HSPA8/HSPE1/HSPA6/CCT3/PFDN5/CCT2/NACA/TCP1/CRYAB/CCT5/SHQ1/HSP90AB1/NPM1/TRAP1/CCT6A/NAP1L4/PPIA/TTC1/DNAJA1/CCT4/MKKS/PDRG1/HSPD1/HEATR3/CCDC115/SCAP	26
MF	GO:0003725	double-stranded RNA binding	19/1531	74/18368	7.03023e-06	0.000504964	0.000444012	MBNL1/ILF2/ZBP1/RC3H1/DHX9/EIF4A1/HSP90AB1/DDX21/SLC3A2/DHX15/LRRFIP1/AGO1/TFRC/EIF4B/DDX1/STRBP/MTDH/HSPD1/LSM14A	19
MF	GO:0045296	cadherin binding	52/1531	332/18368	7.05538e-06	0.000504964	0.000444012	ITGB1/HSPA8/RPL24/SERBP1/EEF2/CCNB2/EIF3E/RPL23A/UNC45A/FLNB/HSP90AB1/PDLIM1/EEF1G/SLC3A2/RPL6/RPS26/GAPVD1/DDX3X/RSL1D1/LRRFIP1/BAIAP2L1/RPS2/RPL15/ARVCF/RANBP1/PUF60/CNN3/BZW2/TWF1/TMPO/CDC42EP1/RANGAP1/PDLIM5/USO1/ADD1/RACK1/NCK1/HNRNPK/TMOD3/RTN4/NOP56/MAPRE1/SRC/PARVA/DDX6/ENO1/PTPN11/MYO1B/STAT1/BAIAP2/RPL29/RPL14	52
MF	GO:0008135	translation factor activity, RNA binding	20/1531	84/18368	1.38788e-05	0.000862904	0.000758747	EEF1B2/EIF2B5/EIF3D/EIF3G/EEF2/EEF1A1/EIF2S1/EIF2B4/MTRF1/EIF3E/EIF3K/EIF4A1/EEF1G/EIF3L/TUFM/EEF2K/EIF4B/EIF4E/EIF3H/DENR	20
MF	GO:0000287	magnesium ion binding	38/1531	221/18368	1.42814e-05	0.000862904	0.000758747	RHEB/FARSB/PRKACB/NT5C3A/GTPBP10/PRIM1/THG1L/EPHX2/DUT/MSH2/TOP2A/ENDOV/RPS6KA3/MAP3K7/RAP2A/AASDHPPT/SUCLG2/DCTPP1/RRAGC/WRN/CDC42BPG/HPRT1/STK26/IDH3G/SIK1/PDXK/RNASEH1/MSH6/NUDT5/PRTFDC1/IDH3B/GSS/IMPA1/ENO1/PRPSAP2/NT5C3B/PDCD6/CDC42BPB	38
MF	GO:0140297	NA	58/1531	394/18368	1.48015e-05	0.000862904	0.000758747	MEF2C/SIRT1/ACTB/ATF2/BBS5/KDM1A/LYAR/DAPK3/HMGN3/APEX1/GTF2A2/ID2/PCNA/RPS3/DHX9/PSMD9/TAF9/PARP9/CENPF/CNOT1/NPM1/TAF4B/SMAD2/BUD31/TRIP6/CNOT7/DTX3L/HES1/NCAPG2/SRI/BBS10/VDR/EIF4E/NSD1/SIK1/UHRF2/DNAJA1/HDAC2/GTF2A1/TCF12/STRN/C1D/ANXA4/MKKS/CPNE1/SRC/MTDH/TRIP12/SMARCB1/PPID/STAT1/SETD6/NCOR1/MED24/HDAC5/MEF2A/TP53BP1/MED17	58
MF	GO:0016887	ATPase activity	44/1531	272/18368	1.55013e-05	0.000862904	0.000758747	HSPA8/HSPA6/DDX56/DDX47/SMARCAD1/DDX49/KIF20A/DHX9/SPATA5/SLFN11/EIF4A1/EIF4A3/MCM3/KIF22/MCM7/DDX50/DDX21/DDX28/DHX15/SMCHD1/DDX3X/KIFC1/DDX39B/KIF20B/WRN/MCM2/DDX23/MCM5/CHD1/ATP2C1/YTHDC2/DDX1/KIF16B/CHD6/MCM4/ATAD2/DDX6/DDX10/TOR3A/HSPD1/CHD9/MCM6/DDX52/CHD2	44
MF	GO:0044389	ubiquitin-like protein ligase binding	48/1531	316/18368	3.52143e-05	0.00185709	0.00163293	HSPA8/CASP8/SUMO1/HSPA6/RPL5/PRKACB/CCT2/ARRDC5/TCP1/PSMA3/RPS27A/FANCL/CUL5/CHEK2/TRIM28/RPL23/CCNB1/HSP90AB1/PARP9/CAMLG/HLTF/RPL11/CUL7/RIPK1/PIAS2/SMAD2/TOLLIP/DTX3L/CUL1/TMBIM6/DNM1L/TPI1/BID/RBX1/RANGAP1/UBA52/DNAJA1/PIAS1/ARIH1/LRPPRC/RTN4/SRC/UBE2C/HSPD1/STAT1/RALB/HSPBP1/SUMO2	48
MF	GO:0003724	RNA helicase activity	18/1531	77/18368	4.78834e-05	0.00239896	0.00210939	DDX56/DDX47/DDX49/DHX9/EIF4A1/EIF4A3/DDX50/DDX21/DDX28/DHX15/DDX3X/DDX39B/DDX23/YTHDC2/DDX1/DDX6/DDX10/DDX52	18
MF	GO:0008097	5S rRNA binding	6/1531	10/18368	5.19779e-05	0.00240277	0.00211274	RPL5/TST/EEF2/RPF2/GTF3A/RPL11	6
MF	GO:0017116	single-stranded DNA-dependent ATP-dependent DNA helicase activity	9/1531	23/18368	5.27553e-05	0.00240277	0.00211274	RFC4/DHX9/MCM3/MCM7/MCM2/MCM5/DSCC1/MCM4/MCM6	9
MF	GO:0003678	DNA helicase activity	17/1531	72/18368	6.73623e-05	0.00270442	0.00237798	RFC4/SMARCAD1/DHX9/MCM3/MCM7/DDX3X/WRN/MCM2/MCM5/XRCC6/CHD1/CHD6/DSCC1/MCM4/CHD9/MCM6/CHD2	17
MF	GO:0008186	RNA-dependent ATPase activity	18/1531	79/18368	6.86876e-05	0.00270442	0.00237798	DDX56/DDX47/DDX49/DHX9/EIF4A1/EIF4A3/DDX50/DDX21/DDX28/DHX15/DDX3X/DDX39B/DDX23/YTHDC2/DDX1/DDX6/DDX10/DDX52	18
MF	GO:0003697	single-stranded DNA binding	24/1531	123/18368	6.93605e-05	0.00270442	0.00237798	MSH2/DHX9/SUB1/MCM3/MCM7/FUBP1/SMC2/RNF138/MCM2/CDC45/MCM5/RAD52/SSBP2/HMGB2/TDP1/LRPPRC/REXO4/MCM4/HSPD1/MCM6/TEN1/RAD51D/CNBP/HNRNPA1	24
MF	GO:0090079	translation regulator activity, nucleic acid binding	22/1531	108/18368	7.01746e-05	0.00270442	0.00237798	EEF1B2/EIF2B5/EIF3D/EIF3G/EEF2/EEF1A1/EIF2S1/EIF2B4/MTRF1/EIF3E/EIF3K/EIF4A1/TYMS/EEF1G/EIF3L/TUFM/EEF2K/EIF4B/EIF4E/EIF3H/DENR/PAIP1	22
MF	GO:0061629	RNA polymerase II sequence-specific DNA-binding transcription factor binding	44/1531	299/18368	0.000153819	0.00568441	0.00499827	SIRT1/ACTB/ATF2/BBS5/KDM1A/HMGN3/APEX1/GTF2A2/ID2/PCNA/DHX9/PARP9/CNOT1/NPM1/TAF4B/BUD31/TRIP6/DTX3L/HES1/BBS10/VDR/NSD1/UHRF2/DNAJA1/HDAC2/GTF2A1/STRN/C1D/ANXA4/MKKS/CPNE1/SRC/MTDH/TRIP12/SMARCB1/PPID/STAT1/SETD6/NCOR1/MED24/HDAC5/MEF2A/TP53BP1/MED17	44
MF	GO:0003688	DNA replication origin binding	7/1531	16/18368	0.000160751	0.00568441	0.00499827	DHX9/MCM2/CDC45/MCM5/HSPD1/ORC4/GRWD1	7
MF	GO:0004857	enzyme inhibitor activity	16/1531	70/18368	0.000164519	0.00568441	0.00499827	RPL5/PINX1/ABCE1/RPL23/PARP9/RPS20/RPL11/RNH1/DTX3L/TMBIM6/RPS15/RPS7/ANXA4/HSPBP1/TEN1/PRPSAP2	16
MF	GO:0019787	ubiquitin-like protein transferase activity	61/1531	458/18368	0.000174614	0.00583209	0.00512813	LTN1/RNF115/RCHY1/TRIM11/ATG10/MED6/FANCL/CUL5/TRIM21/RNF121/RC3H1/RNF150/RFWD3/TRIM28/RNFT1/UBA7/TRIM38/HLTF/UBR3/RNF128/VHL/PIAS2/MEX3C/RNF138/TRAF7/NSMCE1/UBE2I/HERC4/RLIM/DTX3L/CUL1/RBX1/UBE2D3/TRIM7/UHRF1/UHRF2/RNF146/PIAS1/PELI2/RNF111/ARIH1/BIRC6/RMND5A/CDC42/PELI1/RBCK1/UBE2C/TRIP12/FBXO3/TRIM2/RNF166/AKTIP/NOSIP/UBE2S/SUMO2/UBE2Z/MED24/FBXW11/HECTD1/UBE3A/RNF186	61
MF	GO:0015631	tubulin binding	52/1531	375/18368	0.000190724	0.0061647	0.00542059	TUBGCP5/PSRC1/RACGAP1/KIF20A/CETN3/KATNA1/HAUS4/NUSAP1/CCDC88A/TPX2/RMDN1/CRYAB/RPS3/RGS2/TPR/DRG1/BIRC5/CCT5/TBCC/SKA1/KIF22/KIF11/FAM161A/CENPF/DDX3X/KIFC1/CLIP2/KIF20B/CCSER2/SVBP/EML3/PAK1/PHF6/CNN3/DNM1L/SUN2/DNM2/REEP4/NIN/KATNBL1/LRPPRC/RABGAP1/STRBP/STMN1/HSPH1/KIF16B/MAPRE1/VASH2/KIFC3/RAD51D/FBXW11/APPL1	52
MF	GO:0003743	translation initiation factor activity	13/1531	51/18368	0.000209738	0.00656741	0.00577468	EIF2B5/EIF3D/EIF3G/EIF2S1/EIF2B4/EIF3E/EIF3K/EIF4A1/EIF3L/EIF4B/EIF4E/EIF3H/DENR	13
MF	GO:0031267	small GTPase binding	39/1531	259/18368	0.000220281	0.00668853	0.00588118	RAB8A/SIKE1/CAV1/DAPK3/PIH1D2/BIRC5/IPO11/GOLGA5/RAB11FIP2/AP3M1/SYTL4/CHM/TBC1D7/MYO5B/RABGEF1/MLPH/PLCE1/PAK1/RANBP1/FMNL3/DNM1L/FGD4/PEX5/RANGAP1/XPO1/RABGAP1/TBC1D13/NOXA1/IPO5/CSE1L/IPO7/DVL1/SPHK2/KPNB1/ARHGDIA/NCKAP1/TNPO1/STRN3/CDC42BPB	39
MF	GO:0000400	four-way junction DNA binding	7/1531	17/18368	0.000253655	0.00747098	0.00656919	MSH2/RAD51C/WRN/HMGB2/MSH6/RAD51D/YY1	7
MF	GO:0031625	ubiquitin protein ligase binding	43/1531	297/18368	0.000260962	0.00747098	0.00656919	HSPA8/CASP8/SUMO1/HSPA6/RPL5/PRKACB/CCT2/ARRDC5/TCP1/PSMA3/RPS27A/FANCL/CUL5/CHEK2/TRIM28/RPL23/HSP90AB1/CAMLG/HLTF/RPL11/CUL7/RIPK1/PIAS2/SMAD2/TOLLIP/CUL1/TMBIM6/DNM1L/TPI1/BID/RBX1/RANGAP1/UBA52/DNAJA1/PIAS1/ARIH1/LRPPRC/RTN4/SRC/HSPD1/RALB/HSPBP1/SUMO2	43
MF	GO:0008017	microtubule binding	40/1531	271/18368	0.00028154	0.0078362	0.00689032	TUBGCP5/PSRC1/RACGAP1/KIF20A/CETN3/KATNA1/HAUS4/NUSAP1/CCDC88A/TPX2/RMDN1/CRYAB/RPS3/DRG1/BIRC5/SKA1/KIF22/KIF11/FAM161A/CENPF/KIFC1/CLIP2/KIF20B/CCSER2/SVBP/EML3/CNN3/DNM1L/SUN2/DNM2/REEP4/NIN/KATNBL1/LRPPRC/STRBP/KIF16B/MAPRE1/VASH2/KIFC3/FBXW11	40
MF	GO:0044183	protein binding involved in protein folding	11/1531	40/18368	0.000311861	0.00844553	0.0074261	FKBP8/HSPA8/HSPA6/CCT3/CCT2/WDR83OS/TCP1/CCT5/HSP90AB1/CCT6A/CCT4	11
MF	GO:0051020	GTPase binding	42/1531	291/18368	0.000327037	0.00862345	0.00758255	RAB8A/SIKE1/CAV1/AIMP1/DAPK3/PIH1D2/BIRC5/IPO11/GOLGA5/RAB11FIP2/AP3M1/SYTL4/CHM/TBC1D7/MYO5B/RABGEF1/MLPH/PLCE1/RRAGC/PAK1/RANBP1/FMNL3/DNM1L/FGD4/PEX5/RANGAP1/XPO1/RABGAP1/TBC1D13/NOXA1/IPO5/CSE1L/IPO7/ENO1/DVL1/SPHK2/KPNB1/ARHGDIA/NCKAP1/TNPO1/STRN3/CDC42BPB	42
MF	GO:0098641	cadherin binding involved in cell-cell adhesion	7/1531	18/18368	0.000385311	0.00989952	0.00870459	PDLIM1/BAIAP2L1/CNN3/CDC42EP1/PDLIM5/TMOD3/BAIAP2	7
MF	GO:0061659	ubiquitin-like protein ligase activity	44/1531	316/18368	0.000524452	0.0131375	0.0115517	LTN1/RNF115/RCHY1/TRIM11/MED6/FANCL/TRIM21/RNF121/RC3H1/RNF150/RFWD3/RNFT1/TRIM38/HLTF/UBR3/RNF128/PIAS2/MEX3C/RNF138/NSMCE1/RLIM/DTX3L/RBX1/UBE2D3/TRIM7/UHRF1/UHRF2/RNF146/PIAS1/PELI2/RNF111/ARIH1/RMND5A/CDC42/PELI1/UBE2C/TRIP12/TRIM2/RNF166/NOSIP/MED24/HECTD1/UBE3A/RNF186	44
MF	GO:0003713	transcription coactivator activity	38/1531	262/18368	0.000557942	0.0136356	0.0119897	SIRT1/KDM1A/TADA1/APEX1/MED6/TRIM21/DHX9/PSMD9/TRIM28/PSMC3IP/TAF9/SUB1/TRIM38/PDLIM1/SFR1/MYCBP/USP16/NPM1/MED20/BUD31/PPRC1/CITED4/TAF5L/ETS1/VGLL1/WDR77/SMARCC2/HMGB2/SMARCA2/KAT2B/MTDH/SMARCB1/CBFB/TADA2A/GPS2/MED24/UBE3A/MED17	38
MF	GO:0004842	ubiquitin-protein transferase activity	56/1531	433/18368	0.000655844	0.0156466	0.0137579	LTN1/RNF115/RCHY1/TRIM11/MED6/FANCL/CUL5/TRIM21/RNF121/RC3H1/RNF150/RFWD3/TRIM28/RNFT1/UBA7/TRIM38/HLTF/UBR3/RNF128/VHL/MEX3C/RNF138/TRAF7/NSMCE1/HERC4/RLIM/DTX3L/CUL1/RBX1/UBE2D3/TRIM7/UHRF1/UHRF2/RNF146/PELI2/RNF111/ARIH1/BIRC6/RMND5A/CDC42/PELI1/RBCK1/UBE2C/TRIP12/FBXO3/TRIM2/RNF166/AKTIP/NOSIP/UBE2S/UBE2Z/MED24/FBXW11/HECTD1/UBE3A/RNF186	56
MF	GO:0061630	ubiquitin protein ligase activity	42/1531	304/18368	0.000812986	0.0189445	0.0166578	LTN1/RNF115/RCHY1/TRIM11/MED6/FANCL/TRIM21/RNF121/RC3H1/RNF150/RFWD3/RNFT1/TRIM38/HLTF/UBR3/RNF128/MEX3C/RNF138/NSMCE1/RLIM/DTX3L/RBX1/UBE2D3/TRIM7/UHRF1/UHRF2/RNF146/PELI2/RNF111/ARIH1/RMND5A/CDC42/PELI1/UBE2C/TRIP12/TRIM2/RNF166/NOSIP/MED24/HECTD1/UBE3A/RNF186	42
MF	GO:0030515	snoRNA binding	9/1531	32/18368	0.000911245	0.0207515	0.0182467	GAR1/DDX21/BYSL/HEATR1/DKC1/NUDT4/NUDT5/NOP56/NOP58	9
MF	GO:0048027	mRNA 5'-UTR binding	8/1531	27/18368	0.00120335	0.0267946	0.0235603	RPL5/RPS14/RPS3A/CCT5/DDX3X/RSL1D1/RPS7/SYNCRIP	8
MF	GO:0140101	catalytic activity, acting on a tRNA	21/1531	124/18368	0.00135783	0.0295772	0.026007	TRMT10C/QTRT2/FARSB/TYW3/NT5C3A/METTL1/RARS2/MTFMT/RPP38/GATC/POP5/LARS2/POP7/QRSL1/CARS2/DTD1/IARS2/DARS2/MARS2/SARS2/TSEN34	21
MF	GO:0035198	miRNA binding	9/1531	34/18368	0.00146415	0.0312144	0.0274466	PUM1/MATR3/RC3H1/DDX21/RBM4/PNPT1/SOX4/AGO1/HNRNPA1	9
MF	GO:0003714	transcription corepressor activity	28/1531	187/18368	0.00174052	0.0363334	0.0319477	SIRT1/MIER1/PFDN5/PRMT5/APEX1/COPS2/URI1/TRIM28/EID1/PARP9/KCTD1/CNOT7/CCND1/RLIM/PAWR/TBL1XR1/NSD1/PIAS1/C1D/DNMT3A/ZMYND11/NCOA5/BTG2/TCF25/C1QBP/GPS2/NCOR1/PHB	28
MF	GO:0016854	racemase and epimerase activity	6/1531	17/18368	0.00183792	0.0375837	0.0330471	RPE/GALM/MCEE/DSEL/GLCE/AMACR	6
MF	GO:0035004	phosphatidylinositol 3-kinase activity	5/1531	12/18368	0.00192292	0.0378042	0.033241	PIK3R3/PIK3C3/IPMK/PIK3CA/PIK3C2G	5
MF	GO:0016811	hydrolase activity, acting on carbon-nitrogen (but not peptide) bonds, in linear amides	14/1531	71/18368	0.00193329	0.0378042	0.033241	SIRT1/MIER1/CAT/ASPA/SIRT5/AMDHD2/NAAA/NDST1/HINT2/BTD/HDAC2/PGLYRP1/HDAC5/PIGL	14
MF	GO:0034212	peptide N-acetyltransferase activity	11/1531	49/18368	0.00196189	0.0378042	0.033241	ATF2/TAF9/EPC2/NAA50/ESCO1/MSL3/KAT2B/NAA30/NAA15/TADA2A/MED24	11
MF	GO:0051059	NF-kappaB binding	8/1531	29/18368	0.0020027	0.0378624	0.0332922	APEX1/NPM1/TAF4B/HDAC2/ANXA4/CPNE1/MTDH/SETD6	8
MF	GO:0000049	tRNA binding	14/1531	72/18368	0.00221951	0.0411506	0.0361835	TRMT10C/RPL35A/SSB/METTL1/AIMP1/THG1L/EEF1A1/SLFN11/HSD17B10/DTD1/IARS2/DARS2/CTU2/SARS2	14
MF	GO:0000217	DNA secondary structure binding	9/1531	36/18368	0.00225877	0.0411506	0.0361835	MEF2C/MSH2/RAD51C/WRN/HNRNPD/HMGB2/MSH6/RAD51D/YY1	9
MF	GO:0008173	RNA methyltransferase activity	13/1531	65/18368	0.00242296	0.0433537	0.0381206	DIMT1/TRMT10C/METTL5/TYW3/METTL1/EMG1/TFB2M/CMTR2/METTL16/FTSJ3/MEPCE/RNMT/TGS1	13
MF	GO:0016874	ligase activity	25/1531	165/18368	0.0025348	0.044559	0.0391805	GART/ATP6V1A/PCCB/FARSB/RTCB/RARS2/GATC/UBA7/LARS2/ACSS3/SUCLG2/PPCS/MCCC1/SLC27A1/QRSL1/CARS2/GSS/IARS2/DARS2/MARS2/SARS2/ACACA/PFAS/CTPS1/ASNSD1	25

## Sheet: GO_C2
ONTOLOGY	ID	Description	GeneRatio	BgRatio	pvalue	p.adjust	qvalue	geneID	Count
BP	GO:1902903	regulation of supramolecular fiber organization	55/1180	383/18723	8.42616e-09	2.88007e-05	2.54581e-05	RHOA/RGS4/PFDN2/LDLR/PTK2B/IQGAP2/HSPA8/INPP5K/ESAM/CARMIL1/ADD3/DLC1/CXCL12/CTTN/MID1IP1/FLNA/ARHGEF5/SHANK3/PFN2/CYFIP2/CAMSAP3/SORBS3/CDK5RAP2/DYRK1A/CORO2B/FERMT2/TPM1/TSC1/MAPRE3/ASAP3/SPTAN1/ABL1/ARHGEF7/SLC9A1/WASF2/MTSS1/FCHSD2/ARAP1/PROX1/CAMSAP2/LMOD1/SSH1/PXN/HIP1R/SPIRE2/VASP/MYADM/BAIAP2/GIT1/RICTOR/OCLN/BIN1/EVL/CFL2/DBNL	55
BP	GO:0032970	regulation of actin filament-based process	56/1180	397/18723	1.17685e-08	2.88007e-05	2.54581e-05	RHOA/RGS4/STC1/PTK2B/IQGAP2/BCAS3/INPP5K/ESAM/ODAM/CARMIL1/ARHGAP17/ADD3/DLC1/RHOBTB1/CXCL12/CTTN/FLNA/ARHGEF5/PKP2/SHANK3/PFN2/CAMK2D/CYFIP2/GATA4/SORBS3/CORO2B/FERMT2/TPM1/TSC1/ASAP3/SPTAN1/ABL1/SLC9A1/WASF2/MTSS1/FCHSD2/ARAP1/RHOG/ILK/PROX1/LMOD1/SSH1/PXN/HIP1R/SPIRE2/VASP/MYADM/BAIAP2/JUP/ARHGDIA/RICTOR/BIN1/EVL/CFL2/DBNL/TRPM4	56
BP	GO:0016125	sterol metabolic process	30/1180	152/18723	1.93423e-08	2.88007e-05	2.54581e-05	INSIG1/FDPS/DHCR24/LDLR/EBPL/SQLE/SMPD1/MSMO1/MVK/NSDHL/EBP/PPARD/OSBPL1A/HDLBP/LIPA/CLN8/ERLIN2/LRP5/DHCR7/G6PD/PRKAG2/SREBF2/VLDLR/LSS/CLN6/HMGCR/RXRA/DGAT2/LCAT/LIPE	30
BP	GO:0032535	regulation of cellular component size	54/1180	383/18723	2.18229e-08	2.88007e-05	2.54581e-05	SPP1/RHOA/VEGFA/PRR16/PTK2B/IQGAP2/CLCN6/GOLGA4/CLN3/ESAM/SLC9A3R1/WNT5A/CARMIL1/ADD3/CLN8/CXCL12/CTTN/CDKL5/GDI1/RARG/ANO6/SHANK3/PFN2/PLS1/CYFIP2/DNM2/CLCN3/SEMA4D/TSC1/HP1BP3/SPTAN1/LRRC8A/ABL1/WASF2/ADNP/FCHSD2/ILK/LMOD1/SSH1/HIP1R/ULK1/SPIRE2/VASP/AKT1S1/MYADM/BAIAP2/RPTOR/RICTOR/BIN1/EVL/SEMA4B/CFL2/SEMA3F/DBNL	54
BP	GO:0061572	actin filament bundle organization	30/1180	161/18723	7.53048e-08	6.63159e-05	5.86192e-05	RHOA/PTK2B/INPP5K/CARMIL1/DLC1/FLNA/ARHGEF5/CALD1/SHANK3/PFN2/PLS1/SORBS3/CORO2B/ACTN1/FERMT2/TPM1/TSC1/ASAP3/ABL1/AIF1L/SLC9A1/WASF2/MTSS1/ARRB1/ARAP1/PXN/RFLNA/SPIRE2/BAIAP2/EVL	30
BP	GO:0007015	actin filament organization	58/1180	442/18723	8.73788e-08	6.63159e-05	5.86192e-05	RHOA/RGS4/PTK2B/IQGAP2/INPP5K/ESAM/CARMIL1/HIP1/ADD3/DLC1/RHOBTB1/CXCL12/CTTN/FLNA/MICALL2/ARHGEF5/CALD1/SHANK3/PFN2/PLS1/CYFIP2/DIAPH1/SORBS3/CORO2B/ACTN1/FERMT2/TPM1/TSC1/ASAP3/SPTAN1/ABL1/AIF1L/SLC9A1/WASF2/NEBL/MTSS1/PLEC/ARRB1/FCHSD2/ARAP1/RHOG/PROX1/LMOD1/SSH1/PXN/HIP1R/RFLNA/SPIRE2/ELMO3/VASP/MYADM/BAIAP2/CORO6/RICTOR/BIN1/EVL/CFL2/DBNL	58
BP	GO:0032956	regulation of actin cytoskeleton organization	50/1180	358/18723	9.79715e-08	6.63159e-05	5.86192e-05	RHOA/RGS4/PTK2B/IQGAP2/BCAS3/INPP5K/ESAM/ODAM/CARMIL1/ARHGAP17/ADD3/DLC1/RHOBTB1/CXCL12/CTTN/FLNA/ARHGEF5/SHANK3/PFN2/CYFIP2/SORBS3/CORO2B/FERMT2/TPM1/TSC1/ASAP3/SPTAN1/ABL1/SLC9A1/WASF2/MTSS1/FCHSD2/ARAP1/RHOG/ILK/PROX1/LMOD1/SSH1/PXN/HIP1R/SPIRE2/VASP/MYADM/BAIAP2/ARHGDIA/RICTOR/BIN1/EVL/CFL2/DBNL	50
BP	GO:0008203	cholesterol metabolic process	27/1180	137/18723	1.01197e-07	6.63159e-05	5.86192e-05	INSIG1/FDPS/DHCR24/LDLR/SQLE/SMPD1/MSMO1/MVK/NSDHL/EBP/PPARD/OSBPL1A/HDLBP/CLN8/ERLIN2/LRP5/DHCR7/G6PD/SREBF2/VLDLR/LSS/CLN6/HMGCR/RXRA/DGAT2/LCAT/LIPE	27
BP	GO:0110053	regulation of actin filament organization	42/1180	278/18723	1.17498e-07	6.63159e-05	5.86192e-05	RHOA/RGS4/PTK2B/IQGAP2/INPP5K/ESAM/CARMIL1/ADD3/DLC1/CXCL12/CTTN/FLNA/ARHGEF5/SHANK3/PFN2/CYFIP2/SORBS3/CORO2B/FERMT2/TPM1/TSC1/ASAP3/SPTAN1/ABL1/SLC9A1/WASF2/MTSS1/FCHSD2/ARAP1/LMOD1/SSH1/PXN/HIP1R/SPIRE2/VASP/MYADM/BAIAP2/RICTOR/BIN1/EVL/CFL2/DBNL	42
BP	GO:1902652	secondary alcohol metabolic process	28/1180	147/18723	1.25622e-07	6.63159e-05	5.86192e-05	INSIG1/FDPS/DHCR24/LDLR/SQLE/SMPD1/MSMO1/MVK/NSDHL/EBP/PPARD/OSBPL1A/HDLBP/CLN8/ERLIN2/LRP5/DHCR7/G6PD/ACO2/SREBF2/VLDLR/LSS/CLN6/HMGCR/RXRA/DGAT2/LCAT/LIPE	28
BP	GO:0051017	actin filament bundle assembly	29/1180	157/18723	1.50425e-07	7.21905e-05	6.3812e-05	RHOA/PTK2B/INPP5K/CARMIL1/DLC1/FLNA/ARHGEF5/CALD1/SHANK3/PFN2/PLS1/SORBS3/CORO2B/ACTN1/FERMT2/TPM1/TSC1/ASAP3/ABL1/AIF1L/SLC9A1/WASF2/MTSS1/ARRB1/ARAP1/PXN/SPIRE2/BAIAP2/EVL	29
BP	GO:0008361	regulation of cell size	31/1180	181/18723	3.30805e-07	0.000145526	0.000128637	SPP1/RHOA/VEGFA/PRR16/CLCN6/GOLGA4/CLN3/SLC9A3R1/WNT5A/CLN8/CXCL12/CTTN/CDKL5/GDI1/RARG/ANO6/SHANK3/DNM2/CLCN3/SEMA4D/TSC1/LRRC8A/ABL1/ADNP/ILK/ULK1/AKT1S1/RPTOR/SEMA4B/SEMA3F/DBNL	31
BP	GO:0006066	alcohol metabolic process	47/1180	353/18723	9.58767e-07	0.000389333	0.000344147	PNPLA2/INSIG1/FDPS/DHCR24/PRKG2/LDLR/ALDH1A1/PTK2B/THTPA/RDH11/RETSAT/SQLE/DPAGT1/SMPD1/MSMO1/MVK/INPP5K/NSDHL/EBP/PPARD/OSBPL1A/HDLBP/INPP5B/CLN8/ERLIN2/CHKA/LRP5/DHCR7/G6PD/SYNJ1/ACO2/SREBF2/PCBD2/CBR4/VLDLR/LSS/CLN6/HMGCR/SPTLC2/RXRA/ACSS1/ACSS2/DGAT2/LRAT/LCAT/LIPE/PPIP5K1	47
BP	GO:0072659	protein localization to plasma membrane	40/1180	284/18723	1.48414e-06	0.000559625	0.000494675	PDZK1/PRKG2/TSPAN17/INPP5K/GOLGA4/CLN3/GRIPAP1/SLC9A3R1/KIF13A/EPB41L3/SLC9A3R2/PACS1/GAK/ZDHHC8/FLNA/PKP2/C2CD5/LRP6/PLS1/BSG/PTCH1/MRAP2/AFDN/TTC7B/RAB15/EFR3B/SEC16A/KIF5B/RHOG/ARHGEF16/TMED2/ATP2C2/VPS4A/EHD2/MYADM/JUP/RAMP2/HECTD1/GORASP1/GGA3	40
BP	GO:1901264	carbohydrate derivative transport	18/1180	80/18723	1.83162e-06	0.000629859	0.000556757	SLC5A1/SLC33A1/SLC25A17/SLC10A7/RFT1/CLN3/SLC35A2/SLC25A23/RALBP1/SLC50A1/SLC29A3/ABCD1/LRRC8C/SLC25A42/VLDLR/SLC35D2/LRRC8A/SLC35C1	18
BP	GO:0031032	actomyosin structure organization	31/1180	196/18723	1.94853e-06	0.000629859	0.000556757	RHOA/CNN1/PTK2B/INPP5K/CARMIL1/EPB41L3/MYH11/DLC1/ARHGEF5/PFN2/SORBS3/CORO2B/EPB41L4A/FERMT2/TPM1/TSC1/ASAP3/ABL1/SLC9A1/WASF2/NEBL/PLEC/ARRB1/ARAP1/PROX1/LMOD1/CSRP1/PXN/VPS4A/EVL/CFL2	31
BP	GO:0032231	regulation of actin filament bundle assembly	21/1180	105/18723	2.02834e-06	0.000629859	0.000556757	RHOA/INPP5K/CARMIL1/DLC1/FLNA/ARHGEF5/SHANK3/PFN2/SORBS3/CORO2B/FERMT2/TPM1/TSC1/ASAP3/ABL1/SLC9A1/WASF2/MTSS1/ARAP1/PXN/EVL	21
BP	GO:0046777	protein autophosphorylation	34/1180	227/18723	2.24911e-06	0.000659615	0.00058306	VEGFA/PRKG2/PTK2B/CHP1/MAPKAPK5/GRK5/DDR1/PIM1/EEF2K/FGFR1/CDKL5/BCR/ACVR1B/WNK1/CAMK2D/MOB1B/MKNK2/PRKACA/DYRK1A/CAD/ENG/ABL1/FLT1/FGR/LYN/ULK1/PDGFC/DYRK1B/PRKD2/MINK1/ERN1/PRKD1/ULK3/TOM1L1	34
BP	GO:1990778	protein localization to cell periphery	44/1180	333/18723	2.59424e-06	0.000720789	0.000637134	PDZK1/PRKG2/TSPAN17/INPP5K/GOLGA4/CLN3/GRIPAP1/SLC9A3R1/KIF13A/EPB41L3/SLC9A3R2/PACS1/IQSEC2/GAK/ZDHHC8/FLNA/PKP2/C2CD5/LRP6/WDR19/PLS1/BSG/PTCH1/MRAP2/AFDN/TTC7B/RAB15/EFR3B/SEC16A/KIF5B/RHOG/CLSTN1/ARHGEF16/TMED2/ATP2C2/VPS4A/EHD2/MYADM/JUP/RAMP2/HECTD1/DAG1/GORASP1/GGA3	44
BP	GO:0150115	NA	20/1180	101/18723	4.14574e-06	0.00109427	0.000967268	RHOA/VEGFA/PTK2B/BCAS3/MAPRE2/LDB1/DLC1/CTTN/BCR/CAMSAP3/TLN1/CORO2B/ACTN1/FERMT2/TSC1/ABL1/ARHGEF7/SLC9A1/PLEC/ITGB4	20
BP	GO:0008202	steroid metabolic process	42/1180	319/18723	4.76846e-06	0.00119337	0.00105487	SPP1/INSIG1/FDPS/DHCR24/OSBPL9/LDLR/EBPL/SQLE/SMPD1/HSD17B12/MSMO1/MVK/MED1/NSDHL/EBP/ADM/PPARD/OSBPL1A/HDLBP/LIPA/CLN8/ERLIN2/LRP5/DHCR7/G6PD/COMT/RORC/PBX1/PRKAG2/SREBF2/VLDLR/LSS/ESR1/CLN6/HMGCR/RXRA/DGAT2/PROX1/LCAT/LIPE/NR1D1/STAT5B	42
BP	GO:0031647	regulation of protein stability	40/1180	298/18723	4.97331e-06	0.00119337	0.00105487	CSN3/RPL11/CCNH/CHP1/TMEM25/HSPA8/TMEM183A/HYPK/TADA3/LAMP2/TSPAN1/ATP1B2/PIM1/CREBBP/HIP1/USP7/USP40/BTRC/SYVN1/TBL1X/FLNA/USP33/FBXO7/KRAS/PFN2/NCLN/GIPC1/WIZ/LSS/TSC1/OTUD3/SEC16A/CTSA/CTNND1/HIP1R/CHFR/NR1D1/PRKD1/USP19/GGA3	40
BP	GO:0022411	cellular component disassembly	53/1180	443/18723	5.29022e-06	0.00121422	0.0010733	TMEM39A/RUBCN/DPP4/PBXIP1/ATG12/HSPA8/VPS33A/CALCOCO2/CDK5RAP3/CLN3/GBF1/LAMP2/MELTF/CARMIL1/DDR1/HMGA1/CIDEA/MAPRE2/TSC2/CLEC16A/ADD3/STX5/CTTN/ATG2A/MID1IP1/GAK/ADAM15/SMARCD3/SYNJ1/FBXO7/SCAF4/SREBF2/CAMSAP3/ACIN1/LPIN1/GOLGA2/SPTAN1/ARID1A/KIF5B/HSF1/ATG13/FZD5/CAMSAP2/LMOD1/ULK1/VPS4A/GSK3A/DEDD2/NAPA/CHMP2A/EIF5A/CFL2/FYCO1	53
BP	GO:0007044	cell-substrate junction assembly	19/1180	95/18723	6.152e-06	0.00135318	0.00119613	RHOA/VEGFA/PTK2B/BCAS3/LDB1/DLC1/CTTN/BCR/CAMSAP3/TLN1/CORO2B/ACTN1/FERMT2/TSC1/ABL1/ARHGEF7/SLC9A1/PLEC/ITGB4	19
BP	GO:0060562	epithelial tube morphogenesis	42/1180	325/18723	7.62638e-06	0.00156693	0.00138507	RHOA/VEGFA/MKS1/MED1/ADM/WNT5A/DDR1/TSC2/PKD1/BTRC/LZTS2/DLC1/LRP5/PBX1/HOXA5/RARG/KRAS/TULP3/SIRT6/PRKACA/GATA4/PTCH1/CITED2/ESR1/SPINT1/TSC1/ENG/ABL1/SOX18/MTSS1/TRAF6/ILK/SKI/PROX1/TMED2/VASP/PRKD2/IRX2/IRX1/HECTD1/DAG1/FOXP1	42
BP	GO:0001843	neural tube closure	18/1180	88/18723	7.71738e-06	0.00156693	0.00138507	MKS1/ADM/WNT5A/TSC2/DLC1/RARG/TULP3/PRKACA/PTCH1/CITED2/SPINT1/TSC1/ABL1/TRAF6/SKI/TMED2/VASP/HECTD1	18
BP	GO:0030038	contractile actin filament bundle assembly	20/1180	106/18723	8.92794e-06	0.00165855	0.00146605	RHOA/PTK2B/INPP5K/CARMIL1/DLC1/ARHGEF5/PFN2/SORBS3/CORO2B/FERMT2/TPM1/TSC1/ASAP3/ABL1/SLC9A1/WASF2/ARRB1/ARAP1/PXN/EVL	20
BP	GO:0043149	stress fiber assembly	20/1180	106/18723	8.92794e-06	0.00165855	0.00146605	RHOA/PTK2B/INPP5K/CARMIL1/DLC1/ARHGEF5/PFN2/SORBS3/CORO2B/FERMT2/TPM1/TSC1/ASAP3/ABL1/SLC9A1/WASF2/ARRB1/ARAP1/PXN/EVL	20
BP	GO:0060606	tube closure	18/1180	89/18723	9.11116e-06	0.00165855	0.00146605	MKS1/ADM/WNT5A/TSC2/DLC1/RARG/TULP3/PRKACA/PTCH1/CITED2/SPINT1/TSC1/ABL1/TRAF6/SKI/TMED2/VASP/HECTD1	18
BP	GO:0051258	protein polymerization	39/1180	297/18723	1.09669e-05	0.00192982	0.00170584	RHOA/PTK2B/IQGAP2/ESAM/CARMIL1/TUBGCP2/ADD3/CTTN/MID1IP1/MICALL2/TUBGCP6/PFN2/CYFIP2/DIAPH1/CAMSAP3/CDK5RAP2/DYRK1A/MAPRE3/GOLGA2/SPTAN1/ABL1/ARHGEF7/WASF2/FCHSD2/CAMSAP2/LMOD1/SSH1/HIP1R/SPIRE2/VASP/MYADM/CHMP2A/BAIAP2/GIT1/RICTOR/OCLN/BIN1/EVL/DBNL	39
BP	GO:0051492	regulation of stress fiber assembly	18/1180	91/18723	1.2594e-05	0.00214464	0.00189573	RHOA/INPP5K/CARMIL1/DLC1/ARHGEF5/PFN2/SORBS3/CORO2B/FERMT2/TPM1/TSC1/ASAP3/ABL1/SLC9A1/WASF2/ARAP1/PXN/EVL	18
BP	GO:0110020	regulation of actomyosin structure organization	19/1180	100/18723	1.33883e-05	0.00220865	0.00195231	RHOA/INPP5K/CARMIL1/DLC1/ARHGEF5/PFN2/SORBS3/CORO2B/FERMT2/TPM1/TSC1/ASAP3/ABL1/SLC9A1/WASF2/ARAP1/PROX1/PXN/EVL	19
BP	GO:0051495	positive regulation of cytoskeleton organization	32/1180	226/18723	1.4492e-05	0.00231828	0.00204922	RHOA/PFDN2/PTK2B/IQGAP2/BCAS3/CARMIL1/CTTN/FLNA/ARHGEF5/PFN2/SORBS3/CDK5RAP2/FERMT2/TPM1/TSC1/ABL1/WASF2/MTSS1/FCHSD2/PROX1/LMOD1/PXN/HIP1R/SPIRE2/VASP/BAIAP2/GIT1/RICTOR/OCLN/BIN1/EVL/CFL2	32
BP	GO:0035148	tube formation	24/1180	148/18723	1.77797e-05	0.00268962	0.00237746	VEGFA/MKS1/BCAS3/ADM/WNT5A/TSC2/DLC1/RARG/TULP3/PRKACA/NFIB/PTCH1/CITED2/SPINT1/TSC1/ABL1/TRAF6/SKI/PROX1/TMED2/VASP/IRX2/IRX1/HECTD1	24
BP	GO:0071900	regulation of protein serine/threonine kinase activity	44/1180	359/18723	1.80347e-05	0.00268962	0.00237746	LTF/TLR4/RHOA/VEGFA/IGF2/CCNH/PTK2B/CAB39L/SMPD1/INPP5K/CDK5RAP3/BCCIP/ACSL1/TCL1B/WNT5A/CCND3/PKD1/FGFR1/LRP5/PRKAG2/ARHGEF5/FBXO7/KRAS/LRP6/MAP2K7/HMGCR/FERMT2/MAPRE3/ABL1/FLT1/LYN/MAPK8IP1/TRAF6/ILK/FZD5/PROX1/SH2B3/PDGFC/HGS/RPTOR/ERN1/GHR/RICTOR/CCNK	44
BP	GO:0043087	regulation of GTPase activity	43/1180	348/18723	1.83418e-05	0.00268962	0.00237746	RGS4/PBXIP1/FGD6/PTK2B/IQGAP2/BCAS3/PRKG1/TBC1D8B/TBC1D30/ODAM/WNT5A/PLXNA1/RALBP1/MAPRE2/TSC2/SH3BP4/ARHGAP22/CDKL5/DOCK11/BCR/ARHGEF5/WNK1/ARHGAP45/TBC1D9B/RGP1/SEMA4D/AFDN/FERMT2/TSC1/PROM2/ASAP3/RABGAP1/SLC27A4/ARHGEF7/ARRB1/ARAP1/RHOG/ARHGEF16/CRKL/TMED2/SIPA1L3/TBC1D17/RICTOR	43
BP	GO:0014020	primary neural tube formation	18/1180	94/18723	2.00652e-05	0.0028242	0.00249642	MKS1/ADM/WNT5A/TSC2/DLC1/RARG/TULP3/PRKACA/PTCH1/CITED2/SPINT1/TSC1/ABL1/TRAF6/SKI/TMED2/VASP/HECTD1	18
BP	GO:1902905	positive regulation of supramolecular fiber organization	30/1180	209/18723	2.03295e-05	0.0028242	0.00249642	RHOA/PTK2B/IQGAP2/CARMIL1/CTTN/FLNA/ARHGEF5/PFN2/SORBS3/CDK5RAP2/FERMT2/TPM1/TSC1/ABL1/WASF2/MTSS1/FCHSD2/PROX1/LMOD1/PXN/HIP1R/SPIRE2/VASP/BAIAP2/GIT1/RICTOR/OCLN/BIN1/EVL/CFL2	30
BP	GO:0071902	positive regulation of protein serine/threonine kinase activity	29/1180	200/18723	2.28976e-05	0.0030994	0.00273968	LTF/TLR4/RHOA/VEGFA/IGF2/PTK2B/CAB39L/ACSL1/TCL1B/WNT5A/CCND3/PKD1/FGFR1/ARHGEF5/KRAS/MAP2K7/FERMT2/MAPRE3/FLT1/TRAF6/ILK/FZD5/PROX1/PDGFC/RPTOR/ERN1/GHR/RICTOR/CCNK	29
BP	GO:0008654	phospholipid biosynthetic process	34/1180	253/18723	2.43005e-05	0.00319895	0.00282768	FDPS/DGKA/AGPAT4/CHP1/DPAGT1/MVK/INPP5K/CISH/ADGRF5/CLN3/GPAM/AGPAT1/PPARD/ABHD3/DGKD/SOCS1/SGMS1/GPAT4/CHKA/SYNJ1/CHKB/AGPAT3/SH3YL1/TTC7B/SPTLC2/EFR3B/LPIN1/PGAP2/PIK3C2B/LCAT/MBOAT7/MTMR4/PLD2/PCYT2	34
BP	GO:0032868	response to insulin	35/1180	264/18723	2.48451e-05	0.00319895	0.00282768	TLR2/LPL/INSIG1/IGF2/MZB1/PDE3B/INPP5K/ADM/EPM2AIP1/CCND3/TSC2/EEF2K/SOCS1/EIF4EBP2/RELA/SHC1/ZBTB7B/TNS2/C2CD5/USO1/SLC39A14/MAX/RAB15/TSC1/CAD/LPIN1/SLC27A4/SLC9A1/ECHDC3/SOGA1/LYN/IRS1/GSK3A/BAIAP2/GHR	35
BP	GO:0032271	regulation of protein polymerization	32/1180	233/18723	2.7e-05	0.00333193	0.00294523	RHOA/PTK2B/IQGAP2/ESAM/CARMIL1/ADD3/CTTN/PFN2/CYFIP2/CAMSAP3/CDK5RAP2/DYRK1A/MAPRE3/SPTAN1/ABL1/ARHGEF7/WASF2/FCHSD2/CAMSAP2/LMOD1/SSH1/HIP1R/SPIRE2/VASP/MYADM/BAIAP2/GIT1/RICTOR/OCLN/BIN1/EVL/DBNL	32
BP	GO:0007041	lysosomal transport	20/1180	114/18723	2.7285e-05	0.00333193	0.00294523	VPS39/GCC2/HSPA8/VPS33A/VPS52/CLN3/LAMP2/AP1G1/KIF13A/CLEC16A/HGSNAT/GAK/GNPTAB/HMGXB4/CCDC91/HOOK2/VPS4A/HGS/BIN1/GGA3	20
BP	GO:0010770	positive regulation of cell morphogenesis involved in differentiation	16/1180	79/18723	2.77714e-05	0.00333193	0.00294523	CUL7/CARMIL1/EEF2K/CDKL5/FLNA/CAPRIN2/DNM2/DOCK5/FERMT2/ABL1/ARHGEF7/ILK/CRKL/MYADM/BAIAP2/DBNL	16
BP	GO:0016126	sterol biosynthetic process	14/1180	64/18723	3.53779e-05	0.00406167	0.00359027	INSIG1/FDPS/DHCR24/SQLE/MSMO1/MVK/NSDHL/EBP/ERLIN2/DHCR7/G6PD/PRKAG2/LSS/HMGCR	14
BP	GO:0018107	peptidyl-threonine phosphorylation	20/1180	116/18723	3.53924e-05	0.00406167	0.00359027	INPP5K/WNT5A/SBK1/HIPK1/PRKAG2/HIPK2/EIF4G1/ACVR1B/WNK1/CAMK2D/PRKACA/DYRK1A/SPRED2/CAD/ULK1/DYRK1B/GSK3A/PRKD2/RPTOR/PRKD1	20
BP	GO:0043254	regulation of protein complex assembly	49/1180	428/18723	3.79275e-05	0.00425998	0.00376557	TLR4/RHOA/VEGFA/PTK2B/IQGAP2/HSPA8/ESAM/CARMIL1/FARP2/ABCA3/ADD3/CTTN/EIF4G1/PFN2/CYFIP2/NCLN/CAMSAP3/UNC13B/CDK5RAP2/DYRK1A/ESR1/FERMT2/MAPRE3/SPTAN1/ABL1/ARHGEF7/WASF2/HSF1/FCHSD2/IKBKE/CAMSAP2/LMOD1/SSH1/HIP1R/ULK1/PIEZO1/SPIRE2/LCAT/VASP/NAPA/NR1H2/MYADM/BAIAP2/GIT1/RICTOR/OCLN/BIN1/EVL/DBNL	49
BP	GO:0007030	Golgi organization	24/1180	157/18723	4.79498e-05	0.00524562	0.00463681	STX18/CSNK1A1/GCC2/BCAS3/GBF1/CUL7/TJAP1/STX5/GAK/USO1/DNM2/CAMSAP3/ATP8B3/GOLGA2/SEC16A/ARHGEF7/ARHGAP21/CAMSAP2/TMED2/COG4/PRKD1/GORASP1/PDE4DIP/TANGO2	24
BP	GO:0010506	regulation of autophagy	39/1180	317/18723	4.86902e-05	0.00524562	0.00463681	TMEM39A/RUBCN/ATP6V1C2/CALCOCO2/CLN3/GPR137/WDR41/QSOX1/EHMT2/TSC2/CLEC16A/SH3BP4/CTTN/MID2/NRBP2/USP33/EIF4G1/FBXO7/SREBF2/PRKACA/GATA4/TAB2/SPTLC2/TSC1/GOLGA2/ABL1/TP53INP2/SOGA1/CTSA/FZD5/ULK1/GSK3A/RPTOR/MTMR4/ATP6V0A1/ERN1/DAP/PRKD1/FYCO1	39
BP	GO:0016049	cell growth	53/1180	482/18723	5.5492e-05	0.00585885	0.00517886	SPP1/RHOA/VEGFA/RGS4/LLPH/PTK2B/TMEM97/GOLGA4/CISH/WNT5A/PLXNA1/DDR1/PPARD/EPB41L3/SH3BP4/CXCL12/CTTN/RPS6KA3/CDKL5/G6PD/TSPYL2/GDI1/ADAM15/EIF4G1/RARG/ACVR1B/CAPRIN2/CAMK2D/CYFIP2/SIRT6/DNM2/GATA4/EXTL3/SMARCA2/SEMA4D/SERTAD2/ABL1/SLC9A1/ADNP/DNAJB2/ILK/CLSTN1/CRKL/TCHP/ULK1/JADE1/GSK3A/RPTOR/MAP2K4/KIF26A/SEMA4B/SEMA3F/DBNL	53
BP	GO:0022604	regulation of cell morphogenesis	38/1180	309/18723	6.10744e-05	0.0063218	0.00558809	RHOA/VEGFA/MOV10/FGD6/PTK2B/MELTF/SLC9A3R1/WNT5A/LIMD1/PLXNA1/CUL7/CARMIL1/EPB41L3/EEF2K/DLC1/RHOBTB1/CDKL5/FLNA/CAPRIN2/DIAPH1/DNM2/DOCK5/SEMA4D/FERMT2/TPM1/ABL1/ARHGEF7/FGR/ARAP1/RHOG/ILK/BCL9L/CRKL/MYADM/BAIAP2/ARHGDIA/DAG1/DBNL	38
BP	GO:0001841	neural tube formation	18/1180	102/18723	6.25571e-05	0.00635074	0.00561367	MKS1/ADM/WNT5A/TSC2/DLC1/RARG/TULP3/PRKACA/PTCH1/CITED2/SPINT1/TSC1/ABL1/TRAF6/SKI/TMED2/VASP/HECTD1	18
BP	GO:0001838	embryonic epithelial tube formation	20/1180	121/18723	6.57959e-05	0.00655352	0.00579291	MKS1/ADM/WNT5A/TSC2/DLC1/RARG/TULP3/PRKACA/PTCH1/CITED2/SPINT1/TSC1/ABL1/TRAF6/SKI/TMED2/VASP/IRX2/IRX1/HECTD1	20
BP	GO:1901096	regulation of autophagosome maturation	6/1180	13/18723	7.22727e-05	0.00686744	0.0060704	TMEM39A/RUBCN/CALCOCO2/CLN3/CLEC16A/FYCO1	6
BP	GO:1905244	regulation of modification of synaptic structure	6/1180	13/18723	7.22727e-05	0.00686744	0.0060704	RHOA/CLN3/GRIPAP1/ITSN1/ABL1/BAIAP2	6
BP	GO:0016570	histone modification	51/1180	463/18723	7.28503e-05	0.00686744	0.0060704	VEGFA/IGF2/PBXIP1/SETDB1/DPY30/TADA3/KANSL1/KDM5C/EHMT2/BRPF3/NAA50/FBXL19/TRRAP/CREBBP/USP7/LDB1/ASH2L/KAT6B/TBL1X/MSL3/ZBTB7B/KMT2E/YEATS2/HDAC7/PHC1/CAMK2D/MIER2/DOT1L/SIRT6/SIN3B/HR/PHF2/PHF19/RTF1/ZNF335/NCOA3/TRIP12/ARRB1/APBB1/SKI/SMYD2/SETD1B/KMT5A/JADE1/CTCF/PRKD2/KMT2B/WBP2/KDM6B/EZH1/PRKD1	51
BP	GO:0072175	epithelial tube formation	21/1180	132/18723	7.75339e-05	0.00707551	0.00625432	MKS1/ADM/WNT5A/TSC2/DLC1/RARG/TULP3/PRKACA/PTCH1/CITED2/SPINT1/TSC1/ABL1/TRAF6/SKI/PROX1/TMED2/VASP/IRX2/IRX1/HECTD1	21
BP	GO:0032869	cellular response to insulin stimulus	28/1180	203/18723	7.77381e-05	0.00707551	0.00625432	LPL/INSIG1/IGF2/MZB1/PDE3B/INPP5K/CCND3/TSC2/EEF2K/SOCS1/EIF4EBP2/RELA/SHC1/ZBTB7B/TNS2/C2CD5/USO1/SLC39A14/RAB15/LPIN1/SLC27A4/SLC9A1/ECHDC3/SOGA1/IRS1/GSK3A/BAIAP2/GHR	28
BP	GO:0021915	neural tube development	23/1180	152/18723	8.02571e-05	0.00718097	0.00634754	MKS1/ADM/WNT5A/TSC2/PKD1/DLC1/RARG/TULP3/WDR19/FKBP8/ZNF358/PRKACA/PTCH1/CITED2/SPINT1/TSC1/ABL1/TRAF6/SKI/PROX1/TMED2/VASP/HECTD1	23
BP	GO:0048041	focal adhesion assembly	16/1180	87/18723	9.4809e-05	0.00820507	0.00725278	RHOA/VEGFA/PTK2B/BCAS3/LDB1/DLC1/CTTN/BCR/CAMSAP3/CORO2B/ACTN1/FERMT2/TSC1/ABL1/ARHGEF7/SLC9A1	16
BP	GO:0010769	regulation of cell morphogenesis involved in differentiation	17/1180	96/18723	9.48113e-05	0.00820507	0.00725278	MELTF/CUL7/CARMIL1/EEF2K/CDKL5/FLNA/CAPRIN2/DNM2/DOCK5/FERMT2/ABL1/ARHGEF7/ILK/CRKL/MYADM/BAIAP2/DBNL	17
BP	GO:0018210	peptidyl-threonine modification	20/1180	125/18723	0.000104946	0.00893563	0.00789856	INPP5K/WNT5A/SBK1/HIPK1/PRKAG2/HIPK2/EIF4G1/ACVR1B/WNK1/CAMK2D/PRKACA/DYRK1A/SPRED2/CAD/ULK1/DYRK1B/GSK3A/PRKD2/RPTOR/PRKD1	20
BP	GO:0018205	peptidyl-lysine modification	43/1180	376/18723	0.00011362	0.00952065	0.00841568	SENP5/PBXIP1/SETDB1/DPY30/TADA3/KANSL1/SENP7/EHMT2/BRPF3/NAA50/TRRAP/CREBBP/METTL22/LDB1/ASH2L/KAT6B/RELA/MSL3/ZBED1/PIAS3/KMT2E/YEATS2/HDAC7/PLOD2/DOT1L/PHF19/PIAS1/RTF1/ZNF335/NCOA3/ARRB1/APBB1/SMYD2/SETD1B/KMT5A/JADE1/CTCF/KMT2B/CBX4/WBP2/EZH1/DESI1/TRPM4	43
BP	GO:0048193	Golgi vesicle transport	36/1180	296/18723	0.000118283	0.00975652	0.00862417	INSIG1/COPA/STX18/TRAPPC5/GCC2/SLC10A7/SCAMP2/GOLGA4/VPS52/CLN3/GBF1/TRAPPC3L/AP1G1/KIF13A/VAPA/SNX8/STX5/EPS15/GAK/NRBP2/CCDC91/SEC24D/USO1/SEC31A/DNM2/GOLGA2/SEC16A/ARCN1/MIA3/TMED2/COG4/SPIRE2/NAPA/ERGIC1/PRKD1/GGA3	36
BP	GO:0045017	glycerolipid biosynthetic process	32/1180	252/18723	0.000124453	0.00995261	0.0087975	LPL/PNPLA2/DGKA/LDLR/AGPAT4/INPP5K/CISH/CLN3/GPAM/ACSL1/AGPAT1/ABHD3/DGKD/SOCS1/GPAT4/CHKA/SYNJ1/CHKB/AGPAT3/SH3YL1/TTC7B/EFR3B/LPIN1/DGAT2/PGAP2/PIK3C2B/LCAT/NR1H2/MBOAT7/MTMR4/PLD2/PCYT2	32
BP	GO:0032233	positive regulation of actin filament bundle assembly	13/1180	63/18723	0.000126166	0.00995261	0.0087975	RHOA/CARMIL1/FLNA/ARHGEF5/PFN2/SORBS3/FERMT2/TPM1/TSC1/ABL1/MTSS1/PXN/EVL	13
BP	GO:0007595	lactation	11/1180	47/18723	0.000126317	0.00995261	0.0087975	CSN3/VEGFA/CSN2/NME1/MED1/DDR1/GPAT4/ZBTB7B/CAD/NCOR2/STAT5B	11
BP	GO:0001558	regulation of cell growth	46/1180	414/18723	0.000132049	0.0101434	0.00896612	SPP1/RHOA/VEGFA/RGS4/PTK2B/TMEM97/GOLGA4/CISH/WNT5A/DDR1/PPARD/EPB41L3/SH3BP4/CXCL12/CTTN/RPS6KA3/CDKL5/G6PD/TSPYL2/GDI1/ADAM15/EIF4G1/ACVR1B/CAPRIN2/CAMK2D/DNM2/EXTL3/SMARCA2/SEMA4D/SERTAD2/ABL1/SLC9A1/ADNP/DNAJB2/ILK/CLSTN1/CRKL/TCHP/ULK1/JADE1/GSK3A/RPTOR/KIF26A/SEMA4B/SEMA3F/DBNL	46
BP	GO:0007034	vacuolar transport	23/1180	157/18723	0.00013258	0.0101434	0.00896612	VPS39/GCC2/HSPA8/VPS33A/VPS52/CLN3/LAMP2/AP1G1/KIF13A/CLEC16A/HGSNAT/VPS37C/GAK/GNPTAB/HMGXB4/CCDC91/HOOK2/VPS37B/VPS4A/CHMP2A/HGS/BIN1/GGA3	23
BP	GO:0006654	phosphatidic acid biosynthetic process	9/1180	33/18723	0.000147718	0.0111014	0.00981293	DGKA/AGPAT4/GPAM/AGPAT1/DGKD/GPAT4/AGPAT3/LPIN1/PLD2	9
BP	GO:1900076	regulation of cellular response to insulin stimulus	13/1180	64/18723	0.000149308	0.0111014	0.00981293	LPL/IGF2/INPP5K/TSC2/SOCS1/RELA/ZBTB7B/TNS2/USO1/SLC27A4/ECHDC3/IRS1/GSK3A	13
BP	GO:0030100	regulation of endocytosis	28/1180	211/18723	0.000152674	0.0111939	0.00989477	VEGFA/RUBCN/SMPD1/CLN3/ANKRD13A/WNT5A/TSC2/HIP1/EEF2K/DGKD/ITSN1/SYNJ1/ANO6/RAB5B/CD63/PPP3CA/DNM2/HNRNPK/STON2/PROM2/ABL1/ARFGAP1/ARRB1/ATXN2/HIP1R/NR1H2/BIN1/PRKD1	28
BP	GO:0043547	positive regulation of GTPase activity	32/1180	255/18723	0.000155326	0.0112324	0.00992875	RGS4/PTK2B/BCAS3/TBC1D8B/TBC1D30/ODAM/WNT5A/RALBP1/MAPRE2/TSC2/ARHGAP22/CDKL5/DOCK11/BCR/ARHGEF5/ARHGAP45/TBC1D9B/RGP1/SEMA4D/AFDN/FERMT2/TSC1/ASAP3/RABGAP1/SLC27A4/ARHGEF7/ARAP1/RHOG/ARHGEF16/CRKL/SIPA1L3/TBC1D17	32
BP	GO:0006644	phospholipid metabolic process	43/1180	383/18723	0.00017165	0.0122451	0.010824	LPL/FDPS/DGKA/LDLR/AGPAT4/CHP1/DPAGT1/SMPD1/MVK/INPP5K/CISH/ADGRF5/CLN3/GPAM/AGPAT1/ABHD16A/PPARD/ABHD3/ABCA3/DGKD/SOCS1/SGMS1/INPP5B/GPAT4/CLN8/CHKA/SMPD4/SYNJ1/CHKB/AGPAT3/SH3YL1/TTC7B/SPTLC2/EFR3B/LPIN1/PGAP2/PIK3C2B/LCAT/NR1H2/MBOAT7/MTMR4/PLD2/PCYT2	43
BP	GO:1900026	positive regulation of substrate adhesion-dependent cell spreading	10/1180	41/18723	0.000176751	0.0124409	0.010997	CARMIL1/FLNA/DNM2/DOCK5/FERMT2/ABL1/ARHGEF7/ILK/CRKL/MYADM	10
BP	GO:0034329	cell junction assembly	46/1180	420/18723	0.000184263	0.0124549	0.0110094	TLR2/RHOA/VEGFA/PTK2B/BCAS3/ESAM/ADGRF1/WNT5A/EPB41L3/EEF2K/LDB1/DLC1/CTTN/BCR/MICALL2/AMIGO1/HIPK1/EIF4G1/HDAC7/PKP2/SHANK3/CAMSAP3/PRKACA/TLN1/SEMA4D/AFDN/CORO2B/ACTN1/FERMT2/TLN2/TSC1/ABL1/ARHGEF7/SLC9A1/ADNP/PLEC/CTNND1/NECTIN1/FZD5/CLSTN1/CRKL/ITGB4/JUP/RAMP2/OCLN/DBNL	46
BP	GO:0021700	developmental maturation	34/1180	280/18723	0.000186179	0.0124549	0.0110094	PAEP/LTF/RHOA/VEGFA/NFIA/PTK2B/AP1G1/WNT5A/ANKS1A/MTCH1/FARP2/GPAT4/SNX19/G6PD/HOXA5/CD63/MAEA/ZBTB7A/PRKACA/LYL1/AP1M1/CLCN3/UNC13B/SEMA4D/REC8/SOX18/TRPC4AP/ARCN1/FZD5/CLSTN1/RERE/RFLNA/SEZ6/DAG1	34
BP	GO:0006695	cholesterol biosynthetic process	12/1180	57/18723	0.000186387	0.0124549	0.0110094	INSIG1/FDPS/DHCR24/MSMO1/MVK/NSDHL/EBP/ERLIN2/DHCR7/G6PD/LSS/HMGCR	12
BP	GO:1902653	secondary alcohol biosynthetic process	12/1180	57/18723	0.000186387	0.0124549	0.0110094	INSIG1/FDPS/DHCR24/MSMO1/MVK/NSDHL/EBP/ERLIN2/DHCR7/G6PD/LSS/HMGCR	12
BP	GO:0018105	peptidyl-serine phosphorylation	37/1180	315/18723	0.000195164	0.0128784	0.0113837	VEGFA/PRKG2/CSNK1A1/MAPKAPK5/INPP5K/TCL1B/WNT5A/PKD1/SBK1/RPS6KB2/RPS6KA3/HIPK1/HIPK2/EIF4G1/CAPRIN2/WNK1/MAPK12/PFN2/CAMK2D/MKNK2/SH2D3A/PRKACA/DYRK1A/MAPKAP1/PKN3/ILK/IKBKE/DCLK2/ULK1/DYRK1B/GSK3A/PRKD2/RPTOR/ERN1/RICTOR/PRKD1/ULK3	37
BP	GO:0007565	female pregnancy	26/1180	193/18723	0.000202884	0.0132226	0.0116879	SPP1/PTHLH/VEGFA/KPNA6/UBE2Q1/STC1/MED1/ADM/DDR1/PPARD/COMT/ACVR1B/KRAS/LNPEP/DAZAP1/BSG/CITED2/ESR1/CAD/THBD/TMED2/EPN1/ITGB4/STAT5B/RAMP2/SMURF2	26
BP	GO:0031076	embryonic camera-type eye development	9/1180	35/18723	0.000241275	0.0155328	0.0137301	WNT5A/HIPK1/HIPK2/RARG/TULP3/WDR19/CITED2/FZD5/PROX1	9
BP	GO:0002089	lens morphogenesis in camera-type eye	7/1180	22/18723	0.000285846	0.0180633	0.0159669	HIPK1/HIPK2/ATF4/CITED2/NECTIN1/SKI/PROX1	7
BP	GO:0010720	positive regulation of cell development	35/1180	298/18723	0.000287425	0.0180633	0.0159669	TLR2/VEGFA/GOLGA4/PLXNA1/CUL7/CARMIL1/SRRT/EEF2K/CXCL12/RELA/CDKL5/FLNA/GDI1/AMIGO1/SMARCD3/SYNJ1/CAPRIN2/SHANK3/DNM2/DOCK5/SEMA4D/FERMT2/SPINT1/ABL1/ARHGEF7/ZNF335/ADNP/LYN/ILK/CRKL/MYADM/BAIAP2/BIN1/DAG1/DBNL	35
BP	GO:0090630	activation of GTPase activity	18/1180	115/18723	0.00030202	0.0187572	0.0165802	PTK2B/BCAS3/TBC1D8B/TBC1D30/WNT5A/ARHGAP22/BCR/ARHGEF5/ARHGAP45/TBC1D9B/TSC1/RABGAP1/SLC27A4/RHOG/ARHGEF16/CRKL/SIPA1L3/TBC1D17	18
BP	GO:0008064	regulation of actin polymerization or depolymerization	25/1180	188/18723	0.000325905	0.0195401	0.0172723	RHOA/PTK2B/IQGAP2/ESAM/CARMIL1/ADD3/CXCL12/CTTN/PFN2/CYFIP2/SPTAN1/WASF2/FCHSD2/LMOD1/SSH1/HIP1R/SPIRE2/VASP/MYADM/BAIAP2/RICTOR/BIN1/EVL/CFL2/DBNL	25
BP	GO:0051496	positive regulation of stress fiber assembly	11/1180	52/18723	0.000327894	0.0195401	0.0172723	RHOA/CARMIL1/ARHGEF5/PFN2/SORBS3/FERMT2/TPM1/TSC1/ABL1/PXN/EVL	11
BP	GO:1902188	positive regulation of viral release from host cell	5/1180	11/18723	0.000330578	0.0195401	0.0172723	VAPA/PC/VPS37B/VPS4A/CHMP2A	5
BP	GO:0010810	regulation of cell-substrate adhesion	28/1180	221/18723	0.000333011	0.0195401	0.0172723	RHOA/VEGFA/PTK2B/HSD17B12/RRAS/BCAS3/MELTF/CARMIL1/DDR1/LDB1/DLC1/FLNA/ADAM15/DNM2/CAMSAP3/DOCK5/CORO2B/FERMT2/TSC1/ABL1/ARHGEF7/SLC9A1/ILK/CRKL/MYADM/MINK1/JUP/DAG1	28
BP	GO:0008286	insulin receptor signaling pathway	18/1180	116/18723	0.000336835	0.0195401	0.0172723	IGF2/MZB1/INPP5K/CCND3/TSC2/SOCS1/EIF4EBP2/RELA/SHC1/ZBTB7B/TNS2/C2CD5/SLC39A14/SLC27A4/SOGA1/IRS1/GSK3A/BAIAP2	18
BP	GO:0098732	macromolecule deacylation	18/1180	116/18723	0.000336835	0.0195401	0.0172723	VEGFA/TADA3/PPT2/ABHD16A/TBL1X/MSL3/FLNA/ZBTB7B/HDAC7/CAMK2D/MIER2/SIRT6/SIN3B/DYRK1A/SPRED2/SKI/PRKD2/PRKD1	18
BP	GO:0016055	Wnt signaling pathway	47/1180	444/18723	0.000344369	0.01976	0.0174667	TLR2/RHOA/PBXIP1/CSNK1A1/ATP6V1C2/MKS1/GRK5/CHD8/SLC9A3R1/WNT5A/LIMD1/TSC2/PKD1/GPRC5B/BTRC/LZTS2/TCF7L2/LDB1/LRP5/TBL1X/OTUD5/CALCOCO1/RARG/HMGXB4/CAPRIN2/LRP6/WNK1/SPIN1/ANKRD6/FERMT2/RTF1/NDRG2/ABL1/FZD8/SULF2/CTNND1/ILK/BCL9L/AMOTL1/FZD5/CCNYL1/SKI/JADE1/GSK3A/JUP/SMURF2/TRPM4	47
BP	GO:0030832	regulation of actin filament length	25/1180	189/18723	0.000353616	0.0200725	0.0177428	RHOA/PTK2B/IQGAP2/ESAM/CARMIL1/ADD3/CXCL12/CTTN/PFN2/CYFIP2/SPTAN1/WASF2/FCHSD2/LMOD1/SSH1/HIP1R/SPIRE2/VASP/MYADM/BAIAP2/RICTOR/BIN1/EVL/CFL2/DBNL	25
BP	GO:0016331	morphogenesis of embryonic epithelium	21/1180	147/18723	0.000361911	0.0203069	0.0179501	MKS1/ADM/WNT5A/TSC2/DLC1/RARG/TULP3/GRSF1/PRKACA/PTCH1/CITED2/SPINT1/TSC1/ABL1/TRAF6/SKI/TMED2/VASP/IRX2/IRX1/HECTD1	21
BP	GO:0031532	actin cytoskeleton reorganization	17/1180	107/18723	0.000367201	0.0203069	0.0179501	RHOA/PTK2B/IQGAP2/BCAS3/ESAM/FARP2/CTTN/FLNA/MICALL2/SHC1/ABL1/PLEC/ARAP1/BAIAP2/MINK1/ARHGDIA/RICTOR	17
BP	GO:0006623	protein targeting to vacuole	9/1180	37/18723	0.000379326	0.0203069	0.0179501	GCC2/HSPA8/LAMP2/VPS37C/GNPTAB/VPS37B/VPS4A/HGS/GGA3	9
BP	GO:0046473	phosphatidic acid metabolic process	9/1180	37/18723	0.000379326	0.0203069	0.0179501	DGKA/AGPAT4/GPAM/AGPAT1/DGKD/GPAT4/AGPAT3/LPIN1/PLD2	9
BP	GO:1900077	negative regulation of cellular response to insulin stimulus	9/1180	37/18723	0.000379326	0.0203069	0.0179501	LPL/INPP5K/TSC2/SOCS1/RELA/TNS2/SLC27A4/IRS1/GSK3A	9
BP	GO:0198738	cell-cell signaling by wnt	47/1180	446/18723	0.000380827	0.0203069	0.0179501	TLR2/RHOA/PBXIP1/CSNK1A1/ATP6V1C2/MKS1/GRK5/CHD8/SLC9A3R1/WNT5A/LIMD1/TSC2/PKD1/GPRC5B/BTRC/LZTS2/TCF7L2/LDB1/LRP5/TBL1X/OTUD5/CALCOCO1/RARG/HMGXB4/CAPRIN2/LRP6/WNK1/SPIN1/ANKRD6/FERMT2/RTF1/NDRG2/ABL1/FZD8/SULF2/CTNND1/ILK/BCL9L/AMOTL1/FZD5/CCNYL1/SKI/JADE1/GSK3A/JUP/SMURF2/TRPM4	47
BP	GO:0006622	protein targeting to lysosome	7/1180	23/18723	0.000388688	0.0204113	0.0180423	GCC2/HSPA8/LAMP2/GNPTAB/VPS4A/HGS/GGA3	7
BP	GO:0043620	regulation of DNA-templated transcription in response to stress	11/1180	53/18723	0.000390517	0.0204113	0.0180423	VEGFA/TMBIM6/BCLAF1/ATF6B/RELA/RPS6KA3/ATF4/BACH1/CITED2/HSF1/CREB3L1	11
BP	GO:0045860	positive regulation of protein kinase activity	42/1180	386/18723	0.000395324	0.02046	0.0180854	LTF/TLR4/RHOA/VEGFA/IGF2/PTK2B/CAB39L/ACSL1/TCL1B/WNT5A/CCND3/PKD1/GPRC5B/SOCS1/FGFR1/ERCC6/DLG3/PRKAG2/ARHGEF5/KRAS/WNK1/MAP2K7/VLDLR/TAB2/FERMT2/MAPRE3/ABL1/FLT1/ADNP/MADD/TRAF6/ILK/FZD5/PROX1/PDGFC/RPTOR/ERN1/GHR/RICTOR/CCNK/DAG1/TOM1L1	42
BP	GO:0030041	actin filament polymerization	25/1180	191/18723	0.000415322	0.0208583	0.0184374	RHOA/PTK2B/IQGAP2/ESAM/CARMIL1/ADD3/CTTN/MICALL2/PFN2/CYFIP2/DIAPH1/SPTAN1/WASF2/FCHSD2/LMOD1/SSH1/HIP1R/SPIRE2/VASP/MYADM/BAIAP2/RICTOR/BIN1/EVL/DBNL	25
BP	GO:0032984	protein-containing complex disassembly	28/1180	224/18723	0.00041541	0.0208583	0.0184374	TMEM39A/RUBCN/HSPA8/VPS33A/CALCOCO2/CLN3/LAMP2/CARMIL1/HMGA1/CLEC16A/ADD3/MID1IP1/GAK/SMARCD3/SYNJ1/SCAF4/CAMSAP3/SPTAN1/ARID1A/KIF5B/CAMSAP2/LMOD1/VPS4A/NAPA/CHMP2A/EIF5A/CFL2/FYCO1	28
BP	GO:0031589	cell-substrate adhesion	40/1180	363/18723	0.000417192	0.0208583	0.0184374	RHOA/VEGFA/PTK2B/HSD17B12/RRAS/BCAS3/MELTF/ATP1B2/CARMIL1/DDR1/PPARD/PKD1/LDB1/DLC1/CTTN/BCR/FLNA/MICALL2/ADAM15/CD63/DNM2/CAMSAP3/SORBS3/DOCK5/CORO2B/ACTN1/FERMT2/TSC1/ABL1/ARHGEF7/SLC9A1/ILK/CD34/CRKL/PXN/MYADM/ITGB4/MINK1/JUP/DAG1	40
BP	GO:1903358	regulation of Golgi organization	6/1180	17/18723	0.000418825	0.0208583	0.0184374	STX18/STX5/DNM2/CAMSAP3/CAMSAP2/PDE4DIP	6
BP	GO:0030838	positive regulation of actin filament polymerization	16/1180	99/18723	0.000444433	0.0219267	0.0193819	RHOA/PTK2B/IQGAP2/CARMIL1/CTTN/PFN2/WASF2/FCHSD2/LMOD1/HIP1R/SPIRE2/VASP/BAIAP2/RICTOR/BIN1/EVL	16
BP	GO:0061138	morphogenesis of a branching epithelium	24/1180	182/18723	0.000481038	0.0233457	0.0206362	VEGFA/MKS1/MED1/ADM/WNT5A/PLXNA1/DDR1/PKD1/BTRC/LRP5/PBX1/HOXA5/KRAS/SIRT6/PTCH1/ESR1/SPINT1/ENG/ABL1/ILK/FZD5/PROX1/TMED2/DAG1	24
BP	GO:0043434	response to peptide hormone	44/1180	414/18723	0.000482038	0.0233457	0.0206362	TLR2/LPL/INSIG1/IGF2/MZB1/PDE3B/INPP5K/ADM/EPM2AIP1/CCND3/TSC2/EEF2K/SOCS1/CXCL12/EIF4EBP2/LRP5/RELA/SHC1/ZBTB7B/TNS2/C2CD5/LRP6/USO1/BSG/JUND/SLC39A14/MAX/RAB15/TSC1/CAD/LPIN1/SLC27A4/SLC9A1/ECHDC3/SOGA1/HSF1/LYN/IRS1/PXN/GSK3A/BAIAP2/STAT5B/GHR/DAG1	44
BP	GO:0061387	regulation of extent of cell growth	17/1180	110/18723	0.000511158	0.0243602	0.0215329	SPP1/VEGFA/GOLGA4/WNT5A/CXCL12/CTTN/CDKL5/GDI1/DNM2/SEMA4D/ABL1/ADNP/ILK/ULK1/SEMA4B/SEMA3F/DBNL	17
BP	GO:0030833	regulation of actin filament polymerization	23/1180	172/18723	0.000512214	0.0243602	0.0215329	RHOA/PTK2B/IQGAP2/ESAM/CARMIL1/ADD3/CTTN/PFN2/CYFIP2/SPTAN1/WASF2/FCHSD2/LMOD1/SSH1/HIP1R/SPIRE2/VASP/MYADM/BAIAP2/RICTOR/BIN1/EVL/DBNL	23
BP	GO:0060831	smoothened signaling pathway involved in dorsal/ventral neural tube patterning	5/1180	12/18723	0.000537341	0.0252175	0.0222908	MKS1/TULP3/WDR19/PRKACA/PTCH1	5
BP	GO:0071496	cellular response to external stimulus	36/1180	320/18723	0.000539796	0.0252175	0.0222908	TLR4/LPL/HNRNPA1/HSPA8/MED1/LAMP2/TLR5/EHMT2/PIM1/NPRL3/CLEC16A/SZT2/COMT/USP33/PRKAG2/EIF4G1/ASNS/ATF4/SREBF2/CBS/MAX/TSC1/ENG/SLC9A1/ADNP/LYN/PLEC/ULK1/PIEZO1/RPTOR/MAP2K4/ARHGDIA/DAP/KIF26A/PRKD1/DAG1	36
BP	GO:0006476	protein deacetylation	16/1180	101/18723	0.00055858	0.0258662	0.0228641	VEGFA/TADA3/TBL1X/MSL3/FLNA/ZBTB7B/HDAC7/CAMK2D/MIER2/SIRT6/SIN3B/DYRK1A/SPRED2/SKI/PRKD2/PRKD1	16
BP	GO:0033674	positive regulation of kinase activity	48/1180	467/18723	0.00058029	0.0266378	0.0235462	LTF/TLR4/RHOA/VEGFA/IGF2/PTK2B/CAB39L/ACSL1/TCL1B/WNT5A/CCND3/DDR1/PKD1/GPRC5B/SOCS1/FGFR1/ERCC6/DLG3/PRKAG2/ARHGEF5/KRAS/WNK1/MOB1B/MAP2K7/VLDLR/TAB2/FERMT2/MAPRE3/ABL1/FLT1/FGR/ADNP/LYN/IRS1/MADD/TRAF6/ILK/FZD5/PROX1/PDGFC/RPTOR/ERN1/GHR/RICTOR/CCNK/PRKD1/DAG1/TOM1L1	48
BP	GO:0033157	regulation of intracellular protein transport	28/1180	229/18723	0.000593072	0.026842	0.0237267	INSIG1/PDZK1/CHP1/GCC2/BCAS3/INPP5K/GRIPAP1/ABLIM3/ERLEC1/TCF7L2/B3GAT3/FLNA/MICALL2/GDI1/C2CD5/SREBF2/UBE2D3/PRKACA/UBE2J1/KIF5B/TM9SF4/ATG13/FZD5/DERL3/GSK3A/YWHAE/JUP/PRKD1	28
BP	GO:0006991	response to sterol depletion	6/1180	18/18723	0.000594908	0.026842	0.0237267	INSIG1/ERLIN2/ZBTB7B/SREBF2/LYN/TMED2	6
BP	GO:0008154	actin polymerization or depolymerization	27/1180	218/18723	0.000603084	0.0269803	0.023849	RHOA/PTK2B/IQGAP2/ESAM/CARMIL1/ADD3/CXCL12/CTTN/MICALL2/PFN2/CYFIP2/DIAPH1/SPTAN1/WASF2/FCHSD2/LMOD1/SSH1/HIP1R/SPIRE2/VASP/MYADM/BAIAP2/RICTOR/BIN1/EVL/CFL2/DBNL	27
BP	GO:0001763	morphogenesis of a branching structure	25/1180	196/18723	0.000612642	0.0270535	0.0239137	VEGFA/MKS1/MED1/ADM/WNT5A/PLXNA1/DDR1/PKD1/BTRC/LRP5/PBX1/HOXA5/KRAS/SIRT6/PTCH1/ESR1/SPINT1/ENG/ABL1/ILK/FZD5/RERE/PROX1/TMED2/DAG1	25
BP	GO:0035264	multicellular organism growth	19/1180	132/18723	0.000614969	0.0270535	0.0239137	IGF2/GPAM/RBBP6/STK40/GPAT4/ERCC6/HOXA5/RARG/TNS2/PLS1/FKBP8/PTCH1/RC3H2/CHD7/PLEC/TMED2/SP2/STAT5B/GHR	19
BP	GO:0030522	intracellular receptor signaling pathway	31/1180	265/18723	0.000665688	0.0290427	0.025672	TLR4/RHOA/PUM1/TRIP4/NR3C2/MED1/TADA3/CNOT1/PPARD/PIM1/THRB/RELA/RORC/CALCOCO1/RARG/ZBTB7A/SAFB/SAFB2/CITED2/ESR1/RXRA/PUM2/ARID1A/TRAF6/CRKL/NCOR2/IRF3/NR1H2/WBP2/NR1D1/FOXP1	31
BP	GO:0046339	diacylglycerol metabolic process	7/1180	25/18723	0.000682074	0.0294333	0.0260172	PNPLA2/DGKA/GPAM/DGKD/GPAT4/DGAT2/LIPE	7
BP	GO:0032527	protein exit from endoplasmic reticulum	10/1180	48/18723	0.000689859	0.0294333	0.0260172	INSIG1/GCC2/HM13/ERLEC1/SYVN1/UBE2J1/SEC16A/TM9SF4/DERL3/HERPUD1	10
BP	GO:0044706	multi-multicellular organism process	27/1180	220/18723	0.000694987	0.0294333	0.0260172	SPP1/PTHLH/VEGFA/KPNA6/UBE2Q1/STC1/DDO/MED1/ADM/DDR1/PPARD/COMT/ACVR1B/KRAS/LNPEP/DAZAP1/BSG/CITED2/ESR1/CAD/THBD/TMED2/EPN1/ITGB4/STAT5B/RAMP2/SMURF2	27
BP	GO:0050773	regulation of dendrite development	16/1180	103/18723	0.000696943	0.0294333	0.0260172	RHOA/CUL7/EEF2K/CDKL5/CAPRIN2/PPP3CA/VLDLR/SEMA4D/ILK/CAMSAP2/CRKL/GSK3A/BAIAP2/SEZ6/GORASP1/DBNL	16
BP	GO:0071375	cellular response to peptide hormone stimulus	33/1180	290/18723	0.000739412	0.030979	0.0273836	LPL/INSIG1/IGF2/MZB1/PDE3B/INPP5K/CCND3/TSC2/EEF2K/SOCS1/EIF4EBP2/RELA/SHC1/ZBTB7B/TNS2/C2CD5/USO1/SLC39A14/MAX/RAB15/LPIN1/SLC27A4/SLC9A1/ECHDC3/SOGA1/HSF1/LYN/IRS1/PXN/GSK3A/BAIAP2/STAT5B/GHR	33
BP	GO:1900024	regulation of substrate adhesion-dependent cell spreading	11/1180	57/18723	0.000750295	0.0311875	0.0275678	MELTF/CARMIL1/FLNA/DNM2/DOCK5/FERMT2/ABL1/ARHGEF7/ILK/CRKL/MYADM	11
BP	GO:0018209	peptidyl-serine modification	37/1180	338/18723	0.000762277	0.031209	0.0275869	VEGFA/PRKG2/CSNK1A1/MAPKAPK5/INPP5K/TCL1B/WNT5A/PKD1/SBK1/RPS6KB2/RPS6KA3/HIPK1/HIPK2/EIF4G1/CAPRIN2/WNK1/MAPK12/PFN2/CAMK2D/MKNK2/SH2D3A/PRKACA/DYRK1A/MAPKAP1/PKN3/ILK/IKBKE/DCLK2/ULK1/DYRK1B/GSK3A/PRKD2/RPTOR/ERN1/RICTOR/PRKD1/ULK3	37
BP	GO:0043405	regulation of MAP kinase activity	23/1180	177/18723	0.000767586	0.031209	0.0275869	TLR4/VEGFA/PTK2B/SMPD1/INPP5K/CDK5RAP3/WNT5A/FGFR1/ARHGEF5/KRAS/MAP2K7/HMGCR/FLT1/LYN/MAPK8IP1/TRAF6/ILK/FZD5/SH2B3/PDGFC/HGS/ERN1/GHR	23
BP	GO:0046626	regulation of insulin receptor signaling pathway	12/1180	66/18723	0.000768549	0.031209	0.0275869	IGF2/MZB1/INPP5K/CCND3/TSC2/SOCS1/RELA/ZBTB7B/TNS2/SLC27A4/IRS1/GSK3A	12
BP	GO:0007160	cell-matrix adhesion	28/1180	233/18723	0.000780073	0.0314352	0.0277868	RHOA/VEGFA/PTK2B/RRAS/BCAS3/DDR1/PKD1/LDB1/DLC1/CTTN/BCR/ADAM15/CD63/CAMSAP3/CORO2B/ACTN1/FERMT2/TSC1/ABL1/ARHGEF7/SLC9A1/ILK/CD34/PXN/ITGB4/MINK1/JUP/DAG1	28
BP	GO:0046474	glycerophospholipid biosynthetic process	26/1180	211/18723	0.0008142	0.0319055	0.0282026	DGKA/AGPAT4/INPP5K/CISH/CLN3/GPAM/AGPAT1/ABHD3/DGKD/SOCS1/GPAT4/CHKA/SYNJ1/CHKB/AGPAT3/SH3YL1/TTC7B/EFR3B/LPIN1/PGAP2/PIK3C2B/LCAT/MBOAT7/MTMR4/PLD2/PCYT2	26
BP	GO:0010507	negative regulation of autophagy	14/1180	85/18723	0.000816448	0.0319055	0.0282026	TMEM39A/RUBCN/QSOX1/EHMT2/TSC2/CLEC16A/NRBP2/EIF4G1/GATA4/TAB2/TSC1/GOLGA2/CTSA/DAP	14
BP	GO:1902904	negative regulation of supramolecular fiber organization	22/1180	167/18723	0.000822144	0.0319055	0.0282026	PFDN2/LDLR/HSPA8/INPP5K/CARMIL1/ADD3/DLC1/MID1IP1/SHANK3/PFN2/CAMSAP3/DYRK1A/CORO2B/SPTAN1/ARHGEF7/WASF2/ARAP1/CAMSAP2/LMOD1/SSH1/HIP1R/MYADM	22
BP	GO:0032011	ARF protein signal transduction	6/1180	19/18723	0.000823412	0.0319055	0.0282026	GBF1/MAPRE2/PSD3/IQSEC2/ARFGEF3/ARFGAP1	6
BP	GO:0032012	regulation of ARF protein signal transduction	6/1180	19/18723	0.000823412	0.0319055	0.0282026	GBF1/MAPRE2/PSD3/IQSEC2/ARFGEF3/ARFGAP1	6
BP	GO:0016024	CDP-diacylglycerol biosynthetic process	5/1180	13/18723	0.000828009	0.0319055	0.0282026	AGPAT4/GPAM/AGPAT1/GPAT4/AGPAT3	5
BP	GO:0048588	developmental cell growth	28/1180	234/18723	0.000834187	0.0319107	0.0282071	SPP1/VEGFA/RGS4/LLPH/GOLGA4/WNT5A/PLXNA1/DDR1/CXCL12/CTTN/CDKL5/G6PD/GDI1/RARG/CYFIP2/SIRT6/DNM2/GATA4/SEMA4D/ABL1/ADNP/ILK/ULK1/GSK3A/MAP2K4/SEMA4B/SEMA3F/DBNL	28
BP	GO:0050767	regulation of neurogenesis	39/1180	364/18723	0.000842801	0.0320082	0.0282934	TLR2/SPP1/VEGFA/LDLR/GOLGA4/MBD1/WNT5A/PLXNA1/CUL7/SRRT/EEF2K/CXCL12/RELA/CDKL5/GDI1/AMIGO1/SMARCD3/SYNJ1/CAPRIN2/SHANK3/PPP3CA/SEMA4D/SPINT1/ZNF335/ADNP/CHD7/LYN/ILK/SKI/RNF10/ULK1/BAIAP2/NR1D1/BIN1/SEMA4B/DAG1/GORASP1/SEMA3F/DBNL	39
BP	GO:0030516	regulation of axon extension	15/1180	95/18723	0.000850779	0.0320804	0.0283572	VEGFA/GOLGA4/WNT5A/CXCL12/CTTN/CDKL5/GDI1/DNM2/SEMA4D/ABL1/ADNP/ILK/SEMA4B/SEMA3F/DBNL	15
BP	GO:0000041	transition metal ion transport	16/1180	105/18723	0.000863527	0.0323302	0.0285779	LTF/ATOX1/SLC31A1/SLC39A9/PGRMC2/SLC39A11/MELTF/CUTC/SLC39A8/RAB11B/DNM2/ATP13A1/SLC39A14/SLC31A2/NECTIN1/ATP2C2	16
BP	GO:1902186	regulation of viral release from host cell	7/1180	26/18723	0.000883061	0.0328287	0.0290186	VAPA/PC/MID2/TRIM62/VPS37B/VPS4A/CHMP2A	7
BP	GO:0043401	steroid hormone mediated signaling pathway	19/1180	136/18723	0.000891311	0.0329037	0.0290849	RHOA/TRIP4/NR3C2/PGRMC2/MED1/TADA3/CNOT1/PPARD/CALCOCO1/ZBTB7A/SAFB/SAFB2/ESR1/RXRA/ARID1A/NCOR2/WBP2/NR1D1/FOXP1	19
BP	GO:0031929	TOR signaling	18/1180	126/18723	0.00092501	0.0339106	0.0299749	MAPKAPK5/GPR137/TSC2/NPRL3/CLEC16A/SH3BP4/EIF4EBP2/SZT2/RPS6KB2/OTUD5/TSC1/TMEM127/MAPKAP1/SIK3/GSK3A/AKT1S1/RPTOR/RICTOR	18
BP	GO:0010498	proteasomal protein catabolic process	49/1180	490/18723	0.000936451	0.0340933	0.0301364	RPL11/CDC23/CSNK1A1/TRIP4/HM13/PSME3/PSMC5/ERLEC1/UBE4A/FAM8A1/FBXL19/PKD1/USP7/ZNF598/BTRC/ERLIN2/ZSWIM8/SYVN1/TBL1X/SDF2L1/FBXW5/PCBP2/KCTD17/FBXL14/UBE2D3/MAEA/TMEM259/SIRT6/GIPC1/PRKACA/UBE2J1/PIAS1/PSMC1/RMND5A/ZER1/TRPC4AP/RNF19B/DNAJB2/ARRB1/DERL3/CHFR/TRIM2/HERPUD1/GSK3A/NR1D1/SMURF2/HECTD1/USP19/DESI1	49
BP	GO:0050821	protein stabilization	24/1180	191/18723	0.000964498	0.0348739	0.0308264	CSN3/RPL11/CCNH/CHP1/HYPK/LAMP2/TSPAN1/ATP1B2/PIM1/HIP1/USP7/SYVN1/TBL1X/FLNA/USP33/PFN2/NCLN/WIZ/TSC1/OTUD3/SEC16A/CTNND1/HIP1R/USP19	24
BP	GO:0030879	mammary gland development	19/1180	137/18723	0.000975068	0.0350162	0.0309522	CSN3/VEGFA/CSN2/NME1/MED1/WNT5A/DDR1/BTRC/GPAT4/LRP5/ZBTB7B/HOXA5/PTCH1/ESR1/CAD/IRF6/NCOR2/ATP2C2/STAT5B	19
BP	GO:0016242	negative regulation of macroautophagy	8/1180	34/18723	0.00101135	0.0360161	0.031836	TMEM39A/RUBCN/QSOX1/EHMT2/TSC2/CLEC16A/NRBP2/TSC1	8
BP	GO:0031334	positive regulation of protein complex assembly	28/1180	237/18723	0.00101666	0.0360161	0.031836	TLR4/RHOA/VEGFA/PTK2B/IQGAP2/CARMIL1/ABCA3/CTTN/EIF4G1/PFN2/UNC13B/CDK5RAP2/ESR1/FERMT2/WASF2/FCHSD2/LMOD1/HIP1R/PIEZO1/SPIRE2/VASP/NR1H2/BAIAP2/GIT1/RICTOR/OCLN/BIN1/EVL	28
BP	GO:0060999	positive regulation of dendritic spine development	9/1180	42/18723	0.00102338	0.0360161	0.031836	LLPH/EEF2K/CDKL5/ITSN1/CAPRIN2/SHANK3/ZMYND8/BAIAP2/DBNL	9
BP	GO:0032273	positive regulation of protein polymerization	19/1180	138/18723	0.00106547	0.0372491	0.032926	RHOA/PTK2B/IQGAP2/CARMIL1/CTTN/PFN2/CDK5RAP2/WASF2/FCHSD2/LMOD1/HIP1R/SPIRE2/VASP/BAIAP2/GIT1/RICTOR/OCLN/BIN1/EVL	19
BP	GO:0001952	regulation of cell-matrix adhesion	18/1180	128/18723	0.00111383	0.0386834	0.0341938	RHOA/VEGFA/PTK2B/RRAS/BCAS3/DDR1/LDB1/DLC1/ADAM15/CAMSAP3/FERMT2/TSC1/ABL1/SLC9A1/ILK/MINK1/JUP/DAG1	18
BP	GO:0046341	CDP-diacylglycerol metabolic process	5/1180	14/18723	0.00122149	0.0418719	0.0370122	AGPAT4/GPAM/AGPAT1/GPAT4/AGPAT3	5
BP	GO:0048875	chemical homeostasis within a tissue	5/1180	14/18723	0.00122149	0.0418719	0.0370122	VEGFA/ADGRF5/ABCA3/SFTPD/HOMER2	5
BP	GO:0046627	negative regulation of insulin receptor signaling pathway	8/1180	35/18723	0.00123952	0.0422158	0.0373162	INPP5K/TSC2/SOCS1/RELA/TNS2/SLC27A4/IRS1/GSK3A	8
BP	GO:0055001	muscle cell development	23/1180	184/18723	0.00130654	0.044213	0.0390816	VEGFA/RGS4/ADM/MYH11/G6PD/FLNC/PPP3CA/GATA4/ACTN1/TPM1/DYSF/ENG/NEBL/PLEC/SKI/PROX1/LMOD1/CSRP1/GSK3A/MAP2K4/RAMP2/BIN1/CFL2	23
BP	GO:0006694	steroid biosynthetic process	22/1180	173/18723	0.00131546	0.0442313	0.0390978	INSIG1/FDPS/DHCR24/OSBPL9/SQLE/HSD17B12/MSMO1/MVK/MED1/NSDHL/EBP/ADM/OSBPL1A/ERLIN2/DHCR7/G6PD/PBX1/PRKAG2/LSS/HMGCR/PROX1/NR1D1	22
BP	GO:0006888	ER to Golgi vesicle-mediated transport	18/1180	130/18723	0.0013345	0.0445874	0.0394125	INSIG1/COPA/STX18/TRAPPC5/GBF1/TRAPPC3L/VAPA/STX5/NRBP2/SEC24D/USO1/SEC31A/GOLGA2/SEC16A/ARCN1/MIA3/TMED2/ERGIC1	18
BP	GO:0030218	erythrocyte differentiation	17/1180	120/18723	0.00139144	0.0461975	0.0408358	VEGFA/MED1/CDK5RAP3/ADGRF5/LDB1/G6PD/HIPK2/HOXA5/KMT2E/ACVR1B/MAEA/ZBTB7A/CITED2/ACIN1/LYN/SH2B3/STAT5B	17
BP	GO:0051503	adenine nucleotide transport	7/1180	28/18723	0.00142306	0.046952	0.0415027	SLC33A1/SLC25A17/SLC25A23/ABCD1/LRRC8C/SLC25A42/LRRC8A	7
BP	GO:0032007	negative regulation of TOR signaling	9/1180	44/18723	0.00145277	0.0471456	0.0416738	MAPKAPK5/TSC2/NPRL3/SH3BP4/SZT2/TSC1/TMEM127/GSK3A/AKT1S1	9
BP	GO:0043161	proteasome-mediated ubiquitin-dependent protein catabolic process	42/1180	412/18723	0.00145554	0.0471456	0.0416738	RPL11/CDC23/CSNK1A1/TRIP4/PSMC5/ERLEC1/UBE4A/FAM8A1/FBXL19/USP7/ZNF598/BTRC/ERLIN2/ZSWIM8/SYVN1/TBL1X/FBXW5/PCBP2/KCTD17/FBXL14/UBE2D3/MAEA/SIRT6/GIPC1/UBE2J1/PIAS1/PSMC1/RMND5A/ZER1/TRPC4AP/RNF19B/DNAJB2/ARRB1/DERL3/CHFR/TRIM2/HERPUD1/GSK3A/SMURF2/HECTD1/USP19/DESI1	42
BP	GO:0045807	positive regulation of endocytosis	15/1180	100/18723	0.00145572	0.0471456	0.0416738	VEGFA/SMPD1/CLN3/WNT5A/HIP1/EEF2K/DGKD/ITSN1/SYNJ1/ANO6/CD63/PPP3CA/DNM2/HNRNPK/ARRB1	15
BP	GO:1902307	positive regulation of sodium ion transmembrane transport	6/1180	21/18723	0.00147727	0.0475518	0.0420329	CHP1/ATP1B2/WNK1/DNM2/SLC9A1/KIF5B	6
BP	GO:0061515	myeloid cell development	12/1180	71/18723	0.00149591	0.0478599	0.0423052	LTF/TLR2/MED1/ADGRF5/PABPC4/G6PD/MAEA/ZBTB7A/CITED2/WASF2/SH2B3/FOXP1	12
BP	GO:0007566	embryo implantation	10/1180	53/18723	0.00154508	0.0491353	0.0434327	SPP1/VEGFA/UBE2Q1/STC1/DDR1/PPARD/ACVR1B/BSG/ITGB4/SMURF2	10
BP	GO:0016236	macroautophagy	32/1180	291/18723	0.00155441	0.0491361	0.0434333	TMEM39A/RUBCN/ATG12/VPS39/ATP6V1C2/VPS33A/CALCOCO2/CLN3/LAMP2/QSOX1/EHMT2/TSC2/NPRL3/CLEC16A/LGALS8/ATG2A/VPS37C/NRBP2/PRKACA/SPTLC2/TSC1/TP53INP2/ATG13/VPS37B/ULK1/VPS4A/CHMP2A/HGS/ATP6V0A1/ERN1/ULK3/FYCO1	32
BP	GO:0051817	modification of morphology or physiology of other organism involved in symbiotic interaction	13/1180	81/18723	0.00158072	0.0494308	0.0436939	LTF/HSPA8/INPP5K/VAPA/SFTPD/PC/ZBED1/ANO6/TNIP1/RXRA/ULK1/CCNK/DAG1	13
BP	GO:0006898	receptor-mediated endocytosis	28/1180	244/18723	0.00158246	0.0494308	0.0436939	VEGFA/LDLR/CLN3/ADM/ANKRD13A/AP1G1/HIP1/DGKD/SFTPD/CTTN/ITSN1/EPS15/GAK/SYNJ1/CD63/LRP6/GRK4/DNM2/FCHO1/HNRNPK/VLDLR/LDLRAD3/ARRB1/FCHSD2/ATXN2/HIP1R/RAMP2/DBNL	28
CC	GO:0031252	cell leading edge	63/1221	422/19550	9.69876e-11	6.11022e-08	5.07398e-08	TLR4/RHOA/DPP4/FGD6/PTK2B/IQGAP2/ACTG2/BCAS3/INPP5K/NME1/GBF1/ABLIM3/SLC9A3R1/CARMIL1/PTPRM/EPB41L3/LDB1/PSD3/DLC1/CTTN/CDKL5/ITSN1/RAB3IP/C2CD5/DIAPH1/ARHGAP45/DNM2/SH3RF1/CLCN3/TLN1/SH3YL1/ACTN1/FERMT2/TLN2/TPM1/TSC1/ASAP3/ABL1/AIF1L/ARHGEF7/SPATA13/SLC9A1/WASF2/FGR/MTSS1/CTNND1/APBB1/ILK/SCYL3/SSH1/PXN/HIP1R/PIEZO1/RINL/VASP/MYADM/BAIAP2/ITGB4/GIT1/OCLN/EVL/DAG1/DBNL	63
CC	GO:0030055	cell-substrate junction	62/1221	425/19550	3.56052e-10	1.0244e-07	8.50674e-08	RHOA/DPP4/CNN1/PTK2B/RPL4/CHP1/RPL7/HSPA8/RRAS/LIMD1/HMGA1/MAPRE2/SLC9A3R2/DLC1/ARHGAP22/CTTN/GAK/FLNA/JAK1/EPPK1/USP33/DCAF6/FLNC/TNS3/PPP1R12A/PCBP2/TNS2/KRAS/TSPAN9/ARHGAP26/BSG/DNM2/HNRNPK/TLN1/SORBS3/CORO2B/ACTN1/FERMT2/TLN2/ASAP3/ENG/AIF1L/ARHGEF7/FLT1/SLC9A1/SNTB1/PLEC/CAPN5/RHOG/ILK/TNS1/CSRP1/PXN/VASP/ITGB4/GIT1/YWHAE/TNS4/JUP/RPL27/EVL/DAG1	62
CC	GO:0005925	focal adhesion	61/1221	418/19550	4.87811e-10	1.0244e-07	8.50674e-08	RHOA/DPP4/CNN1/PTK2B/RPL4/CHP1/RPL7/HSPA8/RRAS/LIMD1/HMGA1/MAPRE2/SLC9A3R2/DLC1/ARHGAP22/CTTN/GAK/FLNA/JAK1/USP33/DCAF6/FLNC/TNS3/PPP1R12A/PCBP2/TNS2/KRAS/TSPAN9/ARHGAP26/BSG/DNM2/HNRNPK/TLN1/SORBS3/CORO2B/ACTN1/FERMT2/TLN2/ASAP3/ENG/AIF1L/ARHGEF7/FLT1/SLC9A1/SNTB1/PLEC/CAPN5/RHOG/ILK/TNS1/CSRP1/PXN/VASP/ITGB4/GIT1/YWHAE/TNS4/JUP/RPL27/EVL/DAG1	61
CC	GO:0005774	vacuolar membrane	59/1221	444/19550	3.1979e-08	5.0367e-06	4.18252e-06	TMEM63A/DPP4/KXD1/LDLR/TM9SF1/VPS39/ATP6V1C2/HSPA8/PIGR/CLCN6/TRAF3IP3/VPS33A/CALCOCO2/CLN3/GPR137/LAMP2/TSPAN1/WDR41/CCDC115/AP1G1/ABCC10/VAPA/NPRL3/CLEC16A/ABCA3/HGSNAT/SLC29A3/SZT2/TMEM175/ATP11A/ABCD1/CD63/SYNGR1/SLC39A8/LNPEP/AP1M1/CLCN3/VLDLR/SLC39A14/SLC17A5/ECE1/LRRC8A/KIF5B/THBD/RPN2/CTSA/LYN/STK11IP/ARRB1/GNB1/AP1B1/ULK1/VPS4A/NAPA/RPTOR/SLC26A11/ATP6V0A1/OCLN/PRKD1	59
CC	GO:0001726	ruffle	32/1221	178/19550	5.50893e-08	6.94125e-06	5.76408e-06	TLR4/RHOA/FGD6/INPP5K/NME1/SLC9A3R1/PSD3/DLC1/CTTN/CDKL5/C2CD5/DIAPH1/ARHGAP45/DNM2/CLCN3/TLN1/SH3YL1/ACTN1/TLN2/TPM1/ASAP3/AIF1L/ARHGEF7/SPATA13/WASF2/FGR/MTSS1/HIP1R/RINL/MYADM/BAIAP2/DBNL	32
CC	GO:0005905	clathrin-coated pit	18/1221	70/19550	1.91296e-07	2.0086e-05	1.66796e-05	LDLR/SH3BP4/DGKD/CTTN/ITSN1/EPS15/SYNJ1/DNM2/EPS15L1/FCHO1/VLDLR/LRP10/ARRB1/FCHSD2/HIP1R/EPN1/EPN3/RAMP2	18
CC	GO:0030027	lamellipodium	33/1221	202/19550	3.54796e-07	3.19316e-05	2.65163e-05	RHOA/DPP4/FGD6/PTK2B/IQGAP2/ACTG2/ABLIM3/CARMIL1/PTPRM/CTTN/ITSN1/RAB3IP/DNM2/SH3RF1/FERMT2/TSC1/ARHGEF7/SPATA13/SLC9A1/WASF2/CTNND1/APBB1/ILK/SCYL3/SSH1/PXN/PIEZO1/VASP/BAIAP2/GIT1/EVL/DAG1/DBNL	33
CC	GO:0005765	lysosomal membrane	51/1221	395/19550	6.64325e-07	4.65028e-05	3.86163e-05	TMEM63A/DPP4/KXD1/LDLR/TM9SF1/VPS39/ATP6V1C2/HSPA8/PIGR/CLCN6/TRAF3IP3/VPS33A/CLN3/GPR137/LAMP2/TSPAN1/WDR41/AP1G1/ABCC10/VAPA/NPRL3/CLEC16A/ABCA3/HGSNAT/SLC29A3/SZT2/TMEM175/ATP11A/ABCD1/CD63/SYNGR1/SLC39A8/LNPEP/AP1M1/CLCN3/VLDLR/SLC39A14/SLC17A5/ECE1/LRRC8A/KIF5B/CTSA/LYN/STK11IP/ARRB1/GNB1/AP1B1/RPTOR/SLC26A11/ATP6V0A1/OCLN	51
CC	GO:0098852	lytic vacuole membrane	51/1221	395/19550	6.64325e-07	4.65028e-05	3.86163e-05	TMEM63A/DPP4/KXD1/LDLR/TM9SF1/VPS39/ATP6V1C2/HSPA8/PIGR/CLCN6/TRAF3IP3/VPS33A/CLN3/GPR137/LAMP2/TSPAN1/WDR41/AP1G1/ABCC10/VAPA/NPRL3/CLEC16A/ABCA3/HGSNAT/SLC29A3/SZT2/TMEM175/ATP11A/ABCD1/CD63/SYNGR1/SLC39A8/LNPEP/AP1M1/CLCN3/VLDLR/SLC39A14/SLC17A5/ECE1/LRRC8A/KIF5B/CTSA/LYN/STK11IP/ARRB1/GNB1/AP1B1/RPTOR/SLC26A11/ATP6V0A1/OCLN	51
CC	GO:0005802	trans-Golgi network	36/1221	259/19550	5.46467e-06	0.000344274	0.000285889	DPY30/GCC2/TGOLN2/SLC10A7/INPP5K/SCAMP2/GOLGA4/VPS52/CLN3/GBF1/YIPF6/GPR108/TMEM230/AP1G1/KIF13A/TJAP1/ATP11A/SMPD4/FLNA/CCDC91/DNM2/HOOK2/AP1M1/ATP8B3/RGP1/AFTPH/GOLGA1/FAM91A1/TRAPPC9/ARAP1/AP1B1/ATXN2/COG4/ATP2C2/PRKD1/GGA3	36
CC	GO:0098791	Golgi subcompartment	47/1221	384/19550	7.81991e-06	0.00039106	0.00032474	GOLIM4/DPY30/GCC2/TGOLN2/SLC10A7/GOLGA3/INPP5K/SCAMP2/GOLGA4/VPS52/CLN3/GBF1/YIPF6/GPR108/TMEM230/AP1G1/KIF13A/TJAP1/SGMS1/ST3GAL3/ATP11A/SMPD4/FLNA/CCDC91/USO1/DNM2/HOOK2/AP1M1/ATP8B3/RGP1/AFTPH/GOLGA1/GOLGA2/SULF2/FAM91A1/TRAPPC9/ARAP1/AP1B1/ATXN2/TMED2/COG4/ATP2C2/CANT1/HID1/PRKD1/GGA3/TOM1L1	47
CC	GO:0030117	membrane coat	18/1221	89/19550	8.06949e-06	0.00039106	0.00032474	COPA/VPS39/AP1G1/AP5Z1/EPS15/SYNJ1/SEC24D/SEC31A/CLINT1/AP1M1/EPS15L1/AFTPH/ARCN1/AP1B1/EPN1/CHMP2A/EPN2/EPN3	18
CC	GO:0048475	coated membrane	18/1221	89/19550	8.06949e-06	0.00039106	0.00032474	COPA/VPS39/AP1G1/AP5Z1/EPS15/SYNJ1/SEC24D/SEC31A/CLINT1/AP1M1/EPS15L1/AFTPH/ARCN1/AP1B1/EPN1/CHMP2A/EPN2/EPN3	18
CC	GO:0070820	tertiary granule	25/1221	164/19550	3.0531e-05	0.00137389	0.0011409	LTF/CRISP3/RHOA/TMEM63A/LRG1/LAMP2/CD58/QSOX1/ENPP4/HGSNAT/STXBP2/ATP11A/ANO6/PTPRB/DIAPH1/CYSTM1/SPTAN1/SIRPA/NIT2/SIGLEC5/LAIR1/CANT1/ATP6V0A1/NBEAL2/DBNL	25
CC	GO:0032587	ruffle membrane	18/1221	99/19550	3.69778e-05	0.00155307	0.00128968	RHOA/INPP5K/NME1/PSD3/DLC1/CDKL5/C2CD5/DIAPH1/ARHGAP45/DNM2/CLCN3/TLN1/SH3YL1/TPM1/AIF1L/SPATA13/FGR/HIP1R	18
CC	GO:0030135	coated vesicle	37/1221	299/19550	5.55092e-05	0.00211253	0.00175427	COPA/LDLR/TGOLN2/HSPA8/VPS33A/YIPF6/CCDC115/AP1G1/WNT5A/HIP1/SH3BP4/SFTPD/PACS1/STX5/AVPR2/SREBF2/SEC24D/USO1/SEC31A/CLINT1/DNM2/AP1M1/STON2/ECE1/AFTPH/GOLGA2/SEC16A/ARCN1/FZD5/AP1B1/HIP1R/TMED2/EPN1/EPN2/EPN3/ERGIC1/DBNL	37
CC	GO:0030662	coated vesicle membrane	26/1221	181/19550	6.04016e-05	0.00211253	0.00175427	COPA/LDLR/TGOLN2/HSPA8/AP1G1/WNT5A/HIP1/STX5/AVPR2/SREBF2/SEC24D/USO1/SEC31A/CLINT1/AP1M1/AFTPH/SEC16A/ARCN1/FZD5/AP1B1/HIP1R/TMED2/EPN1/EPN2/EPN3/DBNL	26
CC	GO:0030118	clathrin coat	11/1221	44/19550	6.10555e-05	0.00211253	0.00175427	AP1G1/EPS15/SYNJ1/CLINT1/AP1M1/EPS15L1/AFTPH/AP1B1/EPN1/EPN2/EPN3	11
CC	GO:0016605	PML body	18/1221	103/19550	6.37114e-05	0.00211253	0.00175427	CALCOCO2/UBN1/LRCH4/USP7/TCF7L2/ZBED1/HIPK1/HIPK2/MKNK2/PIAS1/MAX/RNF111/TP53INP2/HSF1/IKBKE/SKI/CHFR/CHD3	18
CC	GO:0099091	postsynaptic specialization, intracellular component	7/1221	19/19550	9.43004e-05	0.00297046	0.0024667	DLG3/CDKL5/BCR/DNM2/LYN/CTNND1/BAIAP2	7
CC	GO:0090575	RNA polymerase II transcription factor complex	24/1221	168/19550	0.00012458	0.00373739	0.00310357	CCNH/TRIP4/TADA3/NFYC/ATF6B/HMGA1/NFYA/TRRAP/TCF7L2/LDB1/MED17/PBX1/HIPK2/ATF4/JUND/GATA4/MAX/TCF12/RXRA/TAF4/ADNP/TAF2/TEAD1/BCL9L	24
CC	GO:0005911	cell-cell junction	52/1221	494/19550	0.000158743	0.00454583	0.0037749	RHOA/VEGFA/SLC5A1/IGSF5/DPP4/AMTN/UBN1/PDLIM3/ESAM/LIMD1/TJAP1/PTPRM/VAPA/EPB41L3/ARHGAP17/ADD3/DLG3/FGFRL1/FLNA/MICALL2/EPPK1/ADAM15/PKP2/YBX3/PPP3CA/PCDH1/CAMSAP3/TLN1/AFDN/ACTN1/FERMT2/SLC9A1/WASF2/LYN/CTNND1/ILK/NECTIN1/DDX6/AMOTL1/FZD5/PARD3B/TCHP/PXN/SIPA1L3/VASP/MYADM/BAIAP2/JUP/OCLN/SYNM/PRKD1/DAG1	52
CC	GO:0099092	postsynaptic density, intracellular component	6/1221	15/19550	0.000179802	0.004925	0.00408977	DLG3/CDKL5/BCR/DNM2/CTNND1/BAIAP2	6
CC	GO:0016607	nuclear speck	45/1221	412/19550	0.0001889	0.00495862	0.00411768	SF3B1/CSNK1A1/BCLAF1/AAGAB/PCBP1/MBD1/GRK5/SRSF11/PABPN1/MOCS2/RBBP6/EHMT2/CARMIL1/SRRM2/ATXN2L/AP5Z1/HIPK1/PIAS3/GATAD2B/KMT2E/PRPF40B/ATF4/PRKACA/DYRK1A/AFDN/PIAS1/YLPM1/TCF12/ACIN1/HP1BP3/SRRM1/ZC3H13/PPP1R16B/TRIP12/APBB1/SF3A1/SETD1B/JADE1/MAML3/PRPF31/CBX4/ATP6V0A1/SMURF2/SAP130/NDUFB1	45
CC	GO:0010494	cytoplasmic stress granule	14/1221	76/19550	0.000228486	0.00575785	0.00478137	PUM1/MOV10/TIAL1/ATXN2L/PABPC4/EIF4G1/HNRNPK/PUM2/RC3H2/LARP4B/DDX6/PRRC2C/ATXN2/RPTOR	14
CC	GO:0030667	secretory granule membrane	36/1221	311/19550	0.000266103	0.00644788	0.00535438	TLR2/RHOA/TMEM63A/IQGAP2/PIGR/LAMP2/CD58/ENPP4/VAPA/ABCA3/HGSNAT/ANXA7/APLP2/ATP11A/TMEM184A/ICA1/ANO6/PTPRB/RAB5B/CD63/SYNGR1/DIAPH1/CYSTM1/BSG/AP1M1/ATP8B3/LHFPL2/SIRPA/RHOG/DEGS1/TMED2/SIGLEC5/LAIR1/ATP6V0A1/MFGE8/NBEAL2	36
CC	GO:0035097	histone methyltransferase complex	12/1221	60/19550	0.000285287	0.00665669	0.00552778	DPY30/CHD8/KANSL1/ASH2L/MAX/TAF4/NCOA6/SETD1B/KMT2B/PRPF31/KDM6B/EZH1	12
CC	GO:0032432	actin filament bundle	14/1221	80/19550	0.000397199	0.00893698	0.00742135	PDLIM3/ABLIM3/FLNA/MICALL2/PLS1/ACTN1/FERMT2/TPM1/NEBL/MYL9/ILK/PXN/RFLNA/SIPA1L3	14
CC	GO:0055037	recycling endosome	25/1221	195/19550	0.000498963	0.0108395	0.00900126	LTF/SLC9A9/RAB25/SLC31A1/SCAMP2/VPS52/CLN3/GRIPAP1/MELTF/TMEM230/AP1G1/RABGEF1/ITSN1/ATP11A/MICALL2/RAB11B/CLCN3/SLC31A2/RAB15/RAB11FIP5/FCHSD2/ULK1/EHD2/TBC1D17/GGA3	25
CC	GO:0031253	cell projection membrane	38/1221	346/19550	0.000518624	0.0108911	0.00904408	RHOA/SLC5A1/MUC20/DPP4/RAB25/PDZK1/INPP5K/NME1/SLC34A2/SLC9A3R1/ATP1B2/EPB41L3/PKD1/PSD3/DLC1/CDKL5/C2CD5/SHANK3/MFSD10/DIAPH1/ARHGAP45/DNM2/CLCN3/TLN1/PTCH1/SH3YL1/FERMT2/TPM1/PROM2/SLC27A4/AIF1L/SPATA13/SYTL1/FGR/GNB1/HIP1R/PIEZO1/VASP	38
CC	GO:0043296	apical junction complex	20/1221	145/19550	0.000697932	0.0139789	0.0116082	RHOA/IGSF5/UBN1/ESAM/TJAP1/VAPA/ARHGAP17/DLG3/MICALL2/EPPK1/YBX3/CAMSAP3/CTNND1/NECTIN1/AMOTL1/FZD5/PARD3B/VASP/JUP/OCLN	20
CC	GO:0005667	transcription factor complex	43/1221	413/19550	0.000710041	0.0139789	0.0116082	CREG1/PBXIP1/CCNH/TRIP4/TADA3/NFYC/BDP1/LIMD1/ATF6B/HMGA1/NFYA/TRRAP/CREBBP/TCF7L2/LDB1/MED17/RELA/TBL1X/GATAD2B/PBX1/HIPK2/RARG/ATF4/JUND/GATA4/MAX/TCF12/RXRA/PBX3/GTF3C5/SOX18/TAF4/NCOA6/ADNP/TAF2/TEAD1/BCL9L/SKI/IVNS1ABP/NCOR2/SIX5/PHF12/CHD3	43
CC	GO:0030665	clathrin-coated vesicle membrane	17/1221	116/19550	0.000859918	0.0159367	0.013234	LDLR/TGOLN2/HSPA8/AP1G1/WNT5A/HIP1/AVPR2/CLINT1/AP1M1/AFTPH/FZD5/AP1B1/HIP1R/EPN1/EPN2/EPN3/DBNL	17
CC	GO:0031256	leading edge membrane	23/1221	180/19550	0.000860076	0.0159367	0.013234	RHOA/DPP4/INPP5K/NME1/EPB41L3/PSD3/DLC1/CDKL5/C2CD5/DIAPH1/ARHGAP45/DNM2/CLCN3/TLN1/SH3YL1/FERMT2/TPM1/AIF1L/SPATA13/FGR/HIP1R/PIEZO1/VASP	23
CC	GO:0005938	cell cortex	34/1221	308/19550	0.000909552	0.0163719	0.0135954	RHOA/PTK2B/ADD3/DLC1/RHOBTB1/ARHGAP32/CTTN/FLNA/CALD1/C2CD5/ERC1/PLS1/GRK4/MAEA/GIPC1/UNC13B/ACTN1/FERMT2/TSC1/SPTAN1/ARHGEF7/MYL9/CTNND1/TRAF6/RHOG/PARD3B/TCHP/PXN/HIP1R/SPIRE2/MYADM/RAI14/PRKD1/DBNL	34
CC	GO:0043197	dendritic spine	23/1221	183/19550	0.00107935	0.0188887	0.0156853	RHOA/PTK2B/EEF2K/ARHGAP32/CTTN/ITSN1/BCR/COMT/P2RX6/SHANK3/PPP3CA/GIPC1/PRKACA/ZMYND8/CTNND1/ARRB1/APBB1/CLSTN1/HIP1R/BAIAP2/SEZ6/NR1D1/GRIN1	23
CC	GO:0044309	neuron spine	23/1221	184/19550	0.00116243	0.0197927	0.016436	RHOA/PTK2B/EEF2K/ARHGAP32/CTTN/ITSN1/BCR/COMT/P2RX6/SHANK3/PPP3CA/GIPC1/PRKACA/ZMYND8/CTNND1/ARRB1/APBB1/CLSTN1/HIP1R/BAIAP2/SEZ6/NR1D1/GRIN1	23
CC	GO:0000151	ubiquitin ligase complex	33/1221	301/19550	0.00120518	0.0199806	0.0165921	TSPAN17/CDC23/TMEM183A/WDR26/MED1/UBE4A/CUL7/FAM8A1/CUL9/FBXL19/TRAF7/BTRC/ZSWIM8/SYVN1/FBXW5/USP33/DCAF8/DCAF6/FBXO7/KCTD17/PHC1/FBXL14/DCUN1D4/MAEA/RMND5A/ZER1/TRPC4AP/UBE2V1/RNF19B/MIB2/DERL3/CBX4/SMURF2	33
CC	GO:0005776	autophagosome	15/1221	100/19550	0.00133238	0.0215231	0.0178729	ATG12/TM9SF1/HSPA8/VPS33A/CALCOCO2/CLN3/LAMP2/TMEM230/TP53INP2/RPN2/ULK1/TBC1D17/PRKD1/ULK3/FYCO1	15
CC	GO:0005770	late endosome	31/1221	282/19550	0.00159858	0.0251308	0.0208688	RUBCN/SLC9A9/OSBPL9/LDLR/SLC31A1/VPS39/TMEM25/HSPA8/VPS33A/CLN3/LAMP2/TMEM230/ANKRD13A/OSBPL1A/CLEC16A/ABCA3/SFTPD/SLC29A3/VPS37C/CD63/CLCN3/SLC39A14/SLC31A2/DYSF/MVB12B/VPS37B/LRAT/VPS4A/CHMP2A/HGS/FYCO1	31
CC	GO:0071565	nBAF complex	5/1221	15/19550	0.00166925	0.0251308	0.0208688	DPF2/SMARCD3/SMARCA2/ARID1B/ARID1A	5
CC	GO:0030120	vesicle coat	10/1221	54/19550	0.00167539	0.0251308	0.0208688	COPA/AP1G1/SEC24D/SEC31A/CLINT1/AFTPH/ARCN1/EPN1/EPN2/EPN3	10
CC	GO:0030136	clathrin-coated vesicle	23/1221	196/19550	0.00267408	0.0391784	0.0325341	LDLR/TGOLN2/HSPA8/VPS33A/AP1G1/WNT5A/HIP1/SH3BP4/SFTPD/AVPR2/CLINT1/DNM2/AP1M1/STON2/ECE1/AFTPH/FZD5/AP1B1/HIP1R/EPN1/EPN2/EPN3/DBNL	23
CC	GO:0070160	tight junction	17/1221	129/19550	0.00278444	0.0398681	0.0331068	IGSF5/UBN1/ESAM/TJAP1/VAPA/ARHGAP17/DLG3/MICALL2/EPPK1/YBX3/AFDN/AMOTL1/FZD5/PARD3B/SIPA1L3/VASP/OCLN	17
CC	GO:0034708	methyltransferase complex	13/1221	88/19550	0.00311872	0.0436621	0.0362574	DPY30/CHD8/KANSL1/ASH2L/MAX/ZC3H13/TAF4/NCOA6/SETD1B/KMT2B/PRPF31/KDM6B/EZH1	13
MF	GO:0003712	transcription coregulator activity	71/1218	489/18368	3.17629e-10	3.03971e-07	2.73496e-07	CREG1/GON4L/PBXIP1/BCLAF1/TRIP4/MED1/TADA3/DPF2/AIP/LIMD1/HMGA1/FBXL19/TRRAP/CREBBP/PPRC1/LDB1/TACC1/CCAR1/KAT6B/MED17/TBL1X/MID2/ZBED1/MED15/PIAS3/DCAF6/SMARCD3/HIPK2/CALCOCO1/HDAC7/MIER2/SIRT6/SIN3B/SMARCA2/HR/PHF2/DYRK1A/CITED2/ARID1B/PIAS1/ACTN1/ARID5A/SERTAD2/LPIN1/ABL1/ARID1A/RALY/NCOA6/ZMYND8/NCOA3/TRIM62/RUNX1T1/MED19/ARRB1/APBB1/BCL9L/RERE/PXN/KMT5A/NCOR2/JADE1/MAML3/CDYL2/DYRK1B/NMI/CBX…	71
MF	GO:0016922	nuclear receptor binding	27/1218	144/18368	7.90422e-07	0.000378217	0.000340298	TRIP4/BCAS3/MED1/TADA3/CNOT1/HMGA1/TCF7L2/TACC1/MED17/SMARCD3/RARG/ZBTB7A/JUND/ESR1/RXRA/ARID5A/ARID1A/NCOA6/NCOA3/TRIP12/ARRB1/PROX1/NCOR2/NR1H2/WBP2/STAT5B/FOXP1	27
MF	GO:0003713	transcription coactivator activity	39/1218	262/18368	1.70674e-06	0.000506208	0.000455457	TRIP4/MED1/TADA3/AIP/HMGA1/CREBBP/PPRC1/TACC1/CCAR1/MED17/MID2/ZBED1/DCAF6/SMARCD3/HIPK2/CALCOCO1/SMARCA2/PHF2/DYRK1A/CITED2/ARID1B/ACTN1/SERTAD2/LPIN1/ABL1/ARID1A/NCOA6/NCOA3/TRIM62/ARRB1/APBB1/BCL9L/RERE/JADE1/MAML3/DYRK1B/WBP2/CAMTA2/JUP	39
MF	GO:0003779	actin binding	56/1218	441/18368	2.11581e-06	0.000506208	0.000455457	CNN1/IQGAP2/PDLIM3/ABLIM3/EPB41L3/MYH11/HIP1/ADD3/CTTN/FLNA/MICALL2/CALD1/FLNC/WIPF3/SHANK3/PFN2/PLS1/MAEA/DIAPH1/CAMSAP3/GIPC1/TLN1/FKBP15/AFDN/CORO2B/ACTN1/FERMT2/TLN2/TPM1/SPTAN1/ABL1/AIF1L/WASF2/NEBL/SNTB1/MTSS1/PLEC/TNS1/MIB2/LMOD1/SMTN/SSH1/HIP1R/SPIRE2/VASP/COBLL1/CORO6/WIPF2/TNS4/RAI14/BIN1/EVL/HOMER2/CFL2/DAG1/DBNL	56
MF	GO:0017166	vinculin binding	7/1218	12/18368	3.26579e-06	0.000608407	0.000547409	TLN1/SORBS3/CORO2B/ACTN1/PXN/SYNM/DAG1	7
MF	GO:0045296	cadherin binding	45/1218	332/18368	3.81446e-06	0.000608407	0.000547409	BZW2/PCBP1/HSPA8/GOLGA3/UBAP2/PTPRM/VAPA/HDLBP/SLC9A3R2/ATXN2L/STX5/CTTN/EPS15/FLNA/CALD1/PTPRB/PKP2/ERC1/USO1/CAST/CLINT1/BSG/RAB11B/GIPC1/EPS15L1/HNRNPK/TLN1/AFDN/GOLGA2/SPTAN1/SH3GLB2/WASF2/KIF5B/PLEC/CTNND1/DDX6/ARHGEF16/CRKL/VASP/BAIAP2/COBLL1/YWHAE/EPN2/JUP/DBNL	45
MF	GO:0061629	RNA polymerase II sequence-specific DNA-binding transcription factor binding	41/1218	299/18368	7.63157e-06	0.00104334	0.00093874	RNF25/TRIP4/BCAS3/MED1/CDK5RAP3/TADA3/AIP/CNOT1/PPARD/HMGA1/CREBBP/TCF7L2/LDB1/TACC1/MED17/RELA/SMARCD3/HIPK2/RARG/ATF4/ZBTB7A/JUND/GATA4/CITED2/ESR1/RXRA/ARID5A/ARID1A/TAF4/NCOA6/NCOA3/HSF1/TRIP12/ARRB1/TP53BP2/PROX1/NCOR2/NR1H2/WBP2/STAT5B/FOXP1	41
MF	GO:0030276	clathrin binding	16/1218	72/18368	1.51867e-05	0.00169235	0.00152268	LDLR/AP1G1/HIP1/GAK/CLINT1/AP1M1/STON2/AFTPH/ARRB1/AP1B1/HIP1R/EPN1/EPN2/EPN3/BIN1/TOM1L1	16
MF	GO:0140297	NA	49/1218	394/18368	1.59156e-05	0.00169235	0.00152268	RNF25/TRIP4/BCAS3/MED1/PSMC5/CDK5RAP3/TADA3/AIP/CNOT1/PPARD/HMGA1/MEF2D/CREBBP/TCF7L2/LDB1/TACC1/MED17/RELA/SMARCD3/HIPK2/RARG/HDAC7/ATF4/ZBTB7A/JUND/GATA4/CITED2/ESR1/TCF12/RXRA/ARID5A/ARID1A/TAF4/NCOA6/ZMYND8/NCOA3/HSF1/RUNX1T1/TRIP12/ARRB1/APBB1/TP53BP2/SKI/PROX1/NCOR2/NR1H2/WBP2/STAT5B/FOXP1	49
MF	GO:0005543	phospholipid binding	55/1218	466/18368	2.25301e-05	0.00215613	0.00193996	RUBCN/ESYT1/NCF4/JCHAIN/IQGAP2/HSPA8/BCAS3/GBF1/GRK5/VEPH1/GSDMB/WNT5A/ZCCHC2/OSBPL1A/SNX8/HIP1/AGAP1/ANXA7/ARHGAP32/SNX19/ATG2A/SHC1/C2CD5/PLEKHA5/TULP3/PFN2/CLINT1/ARHGAP26/UNC13B/TLN1/SH3YL1/CLN6/FERMT2/DYSF/MAPKAP1/SLC9A1/MTSS1/FCHSD2/ARAP1/GRAMD1B/PIK3C2B/PARD3B/HIP1R/EPN1/CHMP2A/HGS/PHF12/PLD2/EPN2/EPN3/PITPNC1/BIN1/MFGE8/GGA3/TOM1L1	55
MF	GO:0042974	retinoic acid receptor binding	9/1218	26/18368	2.6808e-05	0.00233229	0.00209846	MED1/CNOT1/HMGA1/TACC1/RARG/ARID5A/NCOA6/NCOR2/NR1H2	9
MF	GO:1901505	carbohydrate derivative transmembrane transporter activity	13/1218	53/18368	3.11813e-05	0.0023359	0.0021017	SLC5A1/SLC33A1/SLC25A17/SLC35A2/SLC25A23/SLC50A1/SLC29A3/ABCD1/SLC25A42/SLC35D2/SLC17A5/LRRC8A/SLC35C1	13
MF	GO:0030674	protein binding, bridging	39/1218	296/18368	3.17311e-05	0.0023359	0.0021017	LPL/PDZK1/JCHAIN/STX18/HSPA8/AP1G1/SLC9A3R1/ATP1B2/EPB41L3/SLC9A3R2/SH2B1/HIP1/SRRT/BTRC/ZSWIM8/STX5/SHC1/FBXO7/SHANK3/STAP2/AP1M1/SH3RF1/STON2/SLC9A1/TRPC4AP/IRS1/MAPK8IP1/ARRB1/GNB1/CRKL/SH2B3/HIP1R/HERPUD1/DEDD2/NAPA/BAIAP2/RPTOR/JUP/HOMER2	39
MF	GO:0005096	GTPase activator activity	54/1218	462/18368	3.48959e-05	0.00238538	0.00214623	RGS4/FGD6/ALDH1A1/IQGAP2/GBF1/TBC1D8B/TBC1D30/WDR41/RALBP1/FARP2/TSC2/NPRL3/ARHGAP17/RABGEF1/AGAP1/PSD3/DLC1/ARHGAP22/ARHGAP32/IQSEC2/ITSN1/DOCK11/BCR/GDI1/DENND2D/ARHGEF5/RAB3IP/ARHGAP26/ARHGAP45/RANBP3/SH2D3A/DOCK6/TBC1D9B/RGP1/DOCK5/ARFGEF3/PLEKHG3/ASAP3/RABGAP1/RALGDS/ARHGEF7/SPATA13/ARHGAP21/ARFGAP1/MADD/ARRB1/ARAP1/ARHGEF16/SIPA1L3/RINL/TBC1D17/GIT1/ARHGDIA/TRIO	54
MF	GO:0030695	GTPase regulator activity	56/1218	488/18368	4.21661e-05	0.00252206	0.0022692	RGS4/FGD6/ALDH1A1/IQGAP2/GBF1/TBC1D8B/TBC1D30/WDR41/RALBP1/FARP2/TSC2/NPRL3/ARHGAP17/RABGEF1/AGAP1/SH3BP4/PSD3/DLC1/ARHGAP22/ARHGAP32/IQSEC2/ITSN1/DOCK11/BCR/GDI1/DENND2D/ARHGEF5/RAB3IP/ARHGAP26/ARHGAP45/RANBP3/SH2D3A/DOCK6/TBC1D9B/RGP1/DOCK5/ARFGEF3/PLEKHG3/ASAP3/RABGAP1/RALGDS/ARHGEF7/SPATA13/ARHGAP21/SIRPA/ARFGAP1/MADD/ARRB1/ARAP1/ARHGEF16/SIPA1L3/RINL/TBC1D17/GIT1/ARHGDIA/TRIO	56
MF	GO:0060589	nucleoside-triphosphatase regulator activity	56/1218	488/18368	4.21661e-05	0.00252206	0.0022692	RGS4/FGD6/ALDH1A1/IQGAP2/GBF1/TBC1D8B/TBC1D30/WDR41/RALBP1/FARP2/TSC2/NPRL3/ARHGAP17/RABGEF1/AGAP1/SH3BP4/PSD3/DLC1/ARHGAP22/ARHGAP32/IQSEC2/ITSN1/DOCK11/BCR/GDI1/DENND2D/ARHGEF5/RAB3IP/ARHGAP26/ARHGAP45/RANBP3/SH2D3A/DOCK6/TBC1D9B/RGP1/DOCK5/ARFGEF3/PLEKHG3/ASAP3/RABGAP1/RALGDS/ARHGEF7/SPATA13/ARHGAP21/SIRPA/ARFGAP1/MADD/ARRB1/ARAP1/ARHGEF16/SIPA1L3/RINL/TBC1D17/GIT1/ARHGDIA/TRIO	56
MF	GO:0031267	small GTPase binding	35/1218	259/18368	4.69453e-05	0.00264275	0.00237779	FGD6/IQGAP2/GCC2/GOLGA4/TBC1D30/AP1G1/RALBP1/TSC2/RABGEF1/SH3BP4/CDKL5/DOCK11/FLNA/MICALL2/GDI1/USP33/YBX3/ERC1/CYFIP2/DIAPH1/UNC13B/RUSC2/RGP1/AFDN/TMEM127/RAB11FIP5/RABGAP1/MAPKAP1/PKN3/SYTL1/ARHGEF16/BICDL1/ULK1/ARHGDIA/GGA3	35
MF	GO:0046965	retinoid X receptor binding	7/1218	17/18368	5.96968e-05	0.00317388	0.00285567	HMGA1/TACC1/RARG/ARID5A/NCOA6/NCOR2/NR1H2	7
MF	GO:0060090	molecular adaptor activity	44/1218	369/18368	0.000114173	0.00575069	0.00517414	LPL/PDZK1/JCHAIN/STX18/HSPA8/CNOT1/AP1G1/SLC9A3R1/ATP1B2/EPB41L3/SLC9A3R2/SH2B1/HIP1/SRRT/BTRC/ZSWIM8/STX5/ITSN1/SHC1/EIF4G1/FBXO7/PKP2/SHANK3/STAP2/AP1M1/SH3RF1/STON2/SLC9A1/TRPC4AP/IRS1/MAPK8IP1/ARRB1/GNB1/CRKL/SH2B3/HIP1R/HERPUD1/DEDD2/NAPA/BAIAP2/RPTOR/JUP/HOMER2/PDE4DIP	44
MF	GO:0043015	gamma-tubulin binding	9/1218	31/18368	0.000127931	0.0061215	0.00550777	NME1/TUBGCP2/TUBGCP6/CDK5RAP2/RAB11FIP5/ARHGEF7/LYN/MARK4/GIT1	9
MF	GO:0004674	protein serine/threonine kinase activity	45/1218	386/18368	0.000161879	0.00737704	0.00663743	PRKG2/CSNK1A1/PTK2B/MAPKAPK5/PRKG1/GRK5/CCND3/PIM1/EEF2K/SBK1/CAMK2G/RPS6KB2/CDK16/RPS6KA3/CDKL5/GAK/BCR/NRBP2/HIPK1/PRKAG2/HIPK2/ACVR1B/WNK1/MAPK12/CAMK2D/GRK4/MKNK2/PRKACA/DYRK1A/ENG/PKN3/ILK/SIK3/IKBKE/ULK1/DYRK1B/GSK3A/MARK4/PRKD2/MINK1/ERN1/TRIO/CCNK/PRKD1/ULK3	45
MF	GO:0051020	GTPase binding	36/1218	291/18368	0.000226405	0.00984861	0.00886121	FGD6/IQGAP2/GCC2/GOLGA4/TBC1D30/AP1G1/RALBP1/TSC2/RABGEF1/SH3BP4/CDKL5/DOCK11/FLNA/MICALL2/GDI1/USP33/YBX3/ERC1/CYFIP2/DIAPH1/UNC13B/RUSC2/RGP1/AFDN/TMEM127/RAB11FIP5/RABGAP1/MAPKAP1/PKN3/SYTL1/ARHGEF16/GNB1/BICDL1/ULK1/ARHGDIA/GGA3	36
MF	GO:0030374	nuclear receptor transcription coactivator activity	12/1218	56/18368	0.000250339	0.0104163	0.00937195	MED1/TADA3/HMGA1/PPRC1/TACC1/CCAR1/MED17/DCAF6/CALCOCO1/ACTN1/NCOA6/NCOA3	12
MF	GO:0003714	transcription corepressor activity	26/1218	187/18368	0.000269225	0.0107354	0.00965904	CREG1/GON4L/PBXIP1/MED1/DPF2/LIMD1/CREBBP/CCAR1/TBL1X/HIPK2/HDAC7/MIER2/SIRT6/SIN3B/CITED2/PIAS1/ARID5A/ZMYND8/RUNX1T1/RERE/KMT5A/NCOR2/CDYL2/CBX4/PHF12/EZH1	26
MF	GO:0008022	protein C-terminus binding	26/1218	189/18368	0.000318965	0.01221	0.0109858	PTK2B/ECM1/SLC9A3R2/USP7/TOP2B/ERCC6/TBL1X/DLG3/MID1IP1/PIAS3/SYNJ1/CALCOCO1/SCAF4/PEX26/SREBF2/SHANK3/AFDN/PIAS1/MAPRE3/ABL1/PRRC2C/ATXN2/VPS4A/BAIAP2/POLR2A/DBNL	26
MF	GO:0015932	nucleobase-containing compound transmembrane transporter activity	11/1218	50/18368	0.000353007	0.0129934	0.0116907	SLC33A1/SLC25A17/SLC35A2/SLC25A23/SLC29A3/ABCD1/SLC25A42/SLC35D2/LRRC8A/SLC35C1/HNRNPA3	11
MF	GO:0035091	phosphatidylinositol binding	33/1218	271/18368	0.000537921	0.0190663	0.0171548	RUBCN/ESYT1/NCF4/IQGAP2/BCAS3/GBF1/VEPH1/GSDMB/ZCCHC2/SNX8/HIP1/ARHGAP32/SNX19/ATG2A/PLEKHA5/TULP3/PFN2/TLN1/SH3YL1/FERMT2/MAPKAP1/SLC9A1/FCHSD2/ARAP1/PIK3C2B/PARD3B/HIP1R/HGS/PHF12/PLD2/PITPNC1/GGA3/TOM1L1	33
MF	GO:0051219	phosphoprotein binding	15/1218	88/18368	0.000629002	0.0203705	0.0183282	BTRC/PHF6/MID2/SHC1/SCAF4/SH2D3A/RTF1/ABL1/FGR/LYN/IRS1/ARRB1/CRKL/CBX4/YWHAE	15
MF	GO:0046332	SMAD binding	14/1218	79/18368	0.000631539	0.0203705	0.0183282	FLNA/HIPK2/ACVR1B/ZBTB7A/RANBP3/GATA4/CITED2/FERMT2/TCF12/RNF111/ZC3H3/CREB3L1/SKI/SMURF2	14
MF	GO:0019787	ubiquitin-like protein transferase activity	49/1218	458/18368	0.000638574	0.0203705	0.0183282	WDSUB1/RNF25/UBE2Q1/CNOT4/HERC3/TSPAN17/CDC23/MED1/PPP1R11/UBE4A/RBBP6/UBE2F/TRAF7/DTX2/ZNF598/BTRC/RNF170/SYVN1/ZBED1/PIAS3/HDAC7/FBXO7/FBXL14/UBE2D3/MAEA/SH3RF1/TTC3/UBE2J1/PIAS1/RNF111/RMND5A/KCMF1/RC3H2/RNF208/RNF19B/TRIM62/TRIP12/TRAF6/RNF214/MIB2/RNF10/HECTD4/CHFR/TRIM2/CBX4/UBE2E3/SMURF2/HECTD1/RNF123	49
MF	GO:0000295	adenine nucleotide transmembrane transporter activity	6/1218	18/18368	0.00077949	0.0233116	0.0209744	SLC33A1/SLC25A17/SLC25A23/ABCD1/SLC25A42/LRRC8A	6
MF	GO:0005346	purine ribonucleotide transmembrane transporter activity	6/1218	18/18368	0.00077949	0.0233116	0.0209744	SLC33A1/SLC25A17/SLC25A23/ABCD1/SLC25A42/LRRC8A	6
MF	GO:0045309	protein phosphorylated amino acid binding	11/1218	56/18368	0.000976664	0.0283233	0.0254836	BTRC/SHC1/SCAF4/SH2D3A/RTF1/ABL1/FGR/IRS1/ARRB1/CRKL/YWHAE	11
MF	GO:0035615	clathrin adaptor activity	6/1218	19/18368	0.00107579	0.0302804	0.0272445	AP1G1/HIP1/AP1M1/STON2/ARRB1/HIP1R	6
MF	GO:0051015	actin filament binding	27/1218	217/18368	0.00119794	0.0324432	0.0291905	IQGAP2/ABLIM3/MYH11/HIP1/ADD3/CTTN/FLNA/MICALL2/FLNC/PLS1/CAMSAP3/TLN1/AFDN/CORO2B/ACTN1/FERMT2/TLN2/TPM1/SPTAN1/ABL1/AIF1L/NEBL/HIP1R/CORO6/BIN1/CFL2/DBNL	27
MF	GO:0030331	estrogen receptor binding	9/1218	41/18368	0.00122043	0.0324432	0.0291905	TRIP4/MED1/CNOT1/TACC1/ESR1/ARID5A/NCOA6/ARRB1/WBP2	9
MF	GO:0140312	NA	6/1218	20/18368	0.00145135	0.036851	0.0331564	AP1G1/HIP1/AP1M1/STON2/ARRB1/HIP1R	6
MF	GO:0008307	structural constituent of muscle	9/1218	42/18368	0.00146326	0.036851	0.0331564	MYH11/TPM1/NEBL/MYL9/PLEC/CSRP1/SMTN/SYNM/DAG1	9
MF	GO:0018024	histone-lysine N-methyltransferase activity	9/1218	43/18368	0.00174343	0.0418315	0.0376375	SETDB1/EHMT2/ASH2L/DOT1L/SMYD2/SETD1B/KMT5A/KMT2B/EZH1	9
MF	GO:0001221	transcription cofactor binding	13/1218	78/18368	0.00174844	0.0418315	0.0376375	EHMT2/PPARD/CREBBP/THRB/RELA/USP11/ZBTB7A/WIZ/ESR1/CTCF/BAIAP2/PHF12/NR1D1	13
MF	GO:0015216	purine nucleotide transmembrane transporter activity	6/1218	21/18368	0.00191903	0.0447929	0.040302	SLC33A1/SLC25A17/SLC25A23/ABCD1/SLC25A42/LRRC8A	6
MF	GO:0005161	platelet-derived growth factor receptor binding	5/1218	15/18368	0.00217847	0.0473817	0.0426313	VEGFA/IL1R1/LYN/PDGFC/ERN1	5
MF	GO:0042813	Wnt-activated receptor activity	5/1218	15/18368	0.00217847	0.0473817	0.0426313	PKD1/LRP5/LRP6/FZD8/FZD5	5
MF	GO:0098847	sequence-specific single stranded DNA binding	5/1218	15/18368	0.00217847	0.0473817	0.0426313	HNRNPA2B1/HNRNPA1/PCBP1/NABP2/HSF1	5

## Sheet: GO_C3
ONTOLOGY	ID	Description	GeneRatio	BgRatio	pvalue	p.adjust	qvalue	geneID	Count
BP	GO:1903131	mononuclear cell differentiation	98/1228	426/18723	9.63799e-29	5.38474e-25	3.7507e-25	SLAMF1/MMP14/LTBR/BCL6/CTLA4/DOCK10/FCER1G/FGL2/STAT6/TESPA1/MFNG/CRACR2A/LEF1/ITK/ANXA1/PTK2B/CCL19/CTSL/TNFSF8/TRAF3IP2/VNN1/BATF/CD3E/CD3D/MS4A1/DUSP10/PTPRC/CD79A/TP53/IL7R/TREM2/SPN/BTK/SASH3/CD40LG/PTPN22/CSF1/TMEM176B/NCKAP1L/NFAM1/SLC46A2/ZFP36L1/ZFP36L2/ITGA4/CRTAM/NFKBID/IKZF3/ZNF683/CD19/IRF2BP2/RUNX2/CD83/CARD11/LFNG/INPP5D/ADAM8/HHEX/SFRP1/BAD/DOCK11/GAS6/TMEM176A/PDE1B/PTPN6/LGALS1/…	98
BP	GO:0042110	T cell activation	105/1228	487/18723	3.06283e-28	8.55601e-25	5.95962e-25	SLAMF1/BCL6/CTLA4/LAPTM5/FCER1G/SLAMF7/FGL2/STAT6/TESPA1/RAC2/CLEC7A/CRACR2A/LEF1/ICAM1/CD209/EBI3/HAVCR2/ITK/CD274/ANXA1/CCL19/CCL21/CTSL/TNFSF8/TRAF3IP2/VNN1/BATF/CD3E/CD3D/DUSP10/PTPRC/CCL5/TP53/IL7R/AIF1/SPN/FGL1/WDFY4/SASH3/CD40LG/TNFAIP8L2/PTPN22/NCKAP1L/PDCD1LG2/SLC46A2/SMAD3/ZFP36L1/ZFP36L2/CRTAM/NFKBID/TREML2/ZNF683/BTN2A2/RUNX2/CD83/CORO1A/LAT/CARD11/LFNG/NLRC3/ADAM8/BAD/CCDC88B/WAS/ELF…	105
BP	GO:0030098	lymphocyte differentiation	86/1228	374/18723	2.59764e-25	4.83767e-22	3.36964e-22	SLAMF1/MMP14/BCL6/CTLA4/DOCK10/FCER1G/FGL2/STAT6/TESPA1/MFNG/CRACR2A/LEF1/ITK/ANXA1/PTK2B/CCL19/CTSL/TNFSF8/TRAF3IP2/VNN1/BATF/CD3E/CD3D/MS4A1/DUSP10/PTPRC/CD79A/TP53/IL7R/SPN/BTK/SASH3/CD40LG/PTPN22/NCKAP1L/NFAM1/SLC46A2/ZFP36L1/ZFP36L2/ITGA4/CRTAM/NFKBID/IKZF3/ZNF683/CD19/IRF2BP2/RUNX2/CD83/CARD11/LFNG/INPP5D/ADAM8/HHEX/SFRP1/BAD/DOCK11/GAS6/PTPN6/LGALS1/KIT/CD74/EGR1/TCF7/JAK3/RUNX1/TNFSF13B/I…	86
BP	GO:0022407	regulation of cell-cell adhesion	94/1228	448/18723	1.92207e-24	2.68465e-21	1.86997e-21	ITGB2/SLAMF1/TGFB1/BCL6/CTLA4/LAPTM5/FGL2/TESPA1/LEF1/CXCL13/ICAM1/CD209/EBI3/HAVCR2/CD274/ANXA1/CCL19/CCL21/VNN1/IL1RN/CD3E/DUSP10/PDPN/PTPRC/PLAUR/CCL5/SERPINF2/IL7R/AIF1/TNF/SPN/FGL1/SASH3/CD40LG/TNFAIP8L2/PTPN22/NCKAP1L/PDCD1LG2/ITGA4/CRTAM/SELP/NFKBID/PTAFR/BTN2A2/FLOT1/MDGA1/CD83/CORO1A/CARD11/ADAM8/ZDHHC2/ZNF703/CXCL12/ALOX5/FERMT3/BAD/ST3GAL4/CCDC88B/PODXL/PTPN6/LGALS1/TNFRSF13C/CD74/FSTL…	94
BP	GO:0045785	positive regulation of cell adhesion	90/1228	437/18723	7.5764e-23	8.46587e-20	5.89683e-20	ITGB2/SLAMF1/BCL6/FN1/PTN/TESPA1/LEF1/CXCL13/ICAM1/CD209/EBI3/HAVCR2/EDIL3/IFT74/CD274/ANXA1/PTK2B/CCL19/CCL21/VNN1/TGM2/CD3E/DUSP10/PDPN/PTPRC/PLAUR/CCL5/SERPINF2/ITGA2/IL7R/HYAL1/AIF1/TNF/ADAM9/ARL2/SASH3/CD40LG/PTPN22/CSF1/NCKAP1L/PDCD1LG2/SMAD3/ITGA4/SELP/FOXF1/NFKBID/PTAFR/FLOT1/CD83/CORO1A/EMP2/CARD11/ADAM8/SFRP1/CXCL12/ALOX5/BAD/EFEMP2/ST3GAL4/RHOD/CCDC88B/S100A10/PODXL/PTPN6/LGALS1/TNFRSF…	90
BP	GO:0002683	negative regulation of immune system process	87/1228	434/18723	2.69318e-21	2.5078e-18	1.74678e-18	SLAMF1/TGFB1/SAMSN1/CD96/APOD/BCL6/CTLA4/LAPTM5/FGL2/STAT6/HAVCR2/CD274/ANXA1/CCL21/TNFAIP3/TGFB3/IL1RL1/DUSP10/ISG15/PTPRC/TYROBP/CD68/MILR1/IL7R/CX3CR1/TREM2/TNF/SPN/FGL1/GPR137B/BTK/SH2D1A/TNFAIP8L2/PTPN22/TMEM176B/NCKAP1L/PDCD1LG2/CRTAM/FOXF1/C1QC/GATA2/BTN2A2/NLRC3/PVRIG/INPP5D/HTRA1/SFRP1/CXCL12/TBC1D10C/TSC22D3/TMEM176A/AHR/PTPN6/BANK1/SLIT2/CD74/FSTL3/JAK3/UBASH3A/RUNX1/FYN/GREM1/PADI2/IL…	87
BP	GO:0007159	leukocyte cell-cell adhesion	79/1228	371/18723	4.09562e-21	3.26889e-18	2.27692e-18	ITGB2/SLAMF1/BCL6/CTLA4/LAPTM5/FGL2/TESPA1/RAC2/LEF1/ICAM1/CD209/EBI3/HAVCR2/CD274/ANXA1/CCL19/CCL21/VNN1/CD3E/DUSP10/PTPRC/CCL5/IL7R/CX3CR1/AIF1/TNF/SPN/FGL1/SASH3/CD40LG/TNFAIP8L2/PTPN22/NCKAP1L/PDCD1LG2/ITGA4/CRTAM/SELP/NFKBID/PTAFR/BTN2A2/CD83/CORO1A/CARD11/ADAM8/CXCL12/ALOX5/FERMT3/BAD/ST3GAL4/CCDC88B/ITGB7/PTPN6/LGALS1/TNFRSF13C/CD74/RASAL3/JAK3/ICOSLG/KLF4/RUNX1/FYN/CD276/TNFSF13B/IL2RA/MA…	79
BP	GO:1903037	regulation of leukocyte cell-cell adhesion	74/1228	336/18723	9.509e-21	6.64084e-18	4.62563e-18	ITGB2/SLAMF1/BCL6/CTLA4/LAPTM5/FGL2/TESPA1/LEF1/ICAM1/CD209/EBI3/HAVCR2/CD274/ANXA1/CCL19/CCL21/VNN1/CD3E/DUSP10/PTPRC/CCL5/IL7R/AIF1/TNF/SPN/FGL1/SASH3/CD40LG/TNFAIP8L2/PTPN22/NCKAP1L/PDCD1LG2/ITGA4/CRTAM/SELP/NFKBID/PTAFR/BTN2A2/CD83/CORO1A/CARD11/ADAM8/CXCL12/ALOX5/BAD/ST3GAL4/CCDC88B/PTPN6/LGALS1/TNFRSF13C/CD74/RASAL3/JAK3/ICOSLG/KLF4/RUNX1/FYN/CD276/TNFSF13B/IL2RA/MAP3K8/SIRPA/LCK/SDC4/IL7/C…	74
BP	GO:0050900	leukocyte migration	78/1228	369/18723	1.17555e-20	7.29757e-18	5.08306e-18	ITGB2/CXCR3/SLAMF1/MMP14/RARRES2/MMP9/APOD/FCER1G/S100A14/S1PR1/MYO1G/PTN/RAC2/CXCL13/ICAM1/ANXA1/PTK2B/CCL19/CCL21/CCL22/CCL5/ITGA2/LGMN/CX3CR1/CCR5/TREM2/TREM1/GPSM3/AIF1/TNF/EDN1/SPN/CH25H/SERPINE1/CSF1/NCKAP1L/ITGA4/CRTAM/SELP/PTAFR/CORO1A/ADAM8/MTUS1/VEGFC/CXCL12/ALOX5/VEGFB/ST3GAL4/XG/CD99/GAS6/ITGB7/EPS8/KIT/SLIT2/BST1/CD74/TRPM2/FYN/GREM1/PADI2/CAMK1D/SIRPA/HCK/LCK/PREX1/SPI1/SELL/PIK3CD/…	78
BP	GO:0022409	positive regulation of cell-cell adhesion	67/1228	284/18723	1.32976e-20	7.42938e-18	5.17487e-18	ITGB2/SLAMF1/BCL6/TESPA1/LEF1/CXCL13/ICAM1/CD209/EBI3/HAVCR2/CD274/ANXA1/CCL19/CCL21/VNN1/CD3E/DUSP10/PDPN/PTPRC/PLAUR/CCL5/SERPINF2/IL7R/AIF1/TNF/SASH3/CD40LG/PTPN22/NCKAP1L/PDCD1LG2/ITGA4/SELP/NFKBID/PTAFR/FLOT1/CD83/CORO1A/CARD11/ADAM8/ALOX5/BAD/ST3GAL4/CCDC88B/PODXL/PTPN6/LGALS1/TNFRSF13C/CD74/FSTL3/RASAL3/JAK3/ICOSLG/RUNX1/FYN/CD276/TNFSF13B/IL2RA/MAP3K8/SIRPA/LCK/IL7/CD44/FLOT2/SKAP1/RARA/F…	67
BP	GO:1903706	regulation of hemopoiesis	77/1228	367/18723	3.35408e-20	1.70357e-17	1.18661e-17	MMP14/TGFB1/HCLS1/BCL6/GPR171/CTLA4/FGL2/PTN/TESPA1/LEF1/LOX/ANXA1/PTK2B/CCL19/VNN1/DUSP10/ISG15/PTPRC/TYROBP/ZFP36/EVI2B/IL7R/MITF/TREM2/TNF/GPR137B/BTK/SASH3/CSF1/TMEM176B/NCKAP1L/NFAM1/SLC46A2/ZFP36L1/ZFP36L2/CRTAM/NFKBID/IKZF3/ZNF683/C1QC/GATA2/CD83/CARD11/INPP5D/ADAM8/SFRP1/BAD/GAS6/TMEM176A/SCIN/PTPN6/CD74/TCF7/FSTL3/JAK3/RUNX1/IL17D/IL15RA/IL2RA/FAM210B/MAFB/KLF10/IL7/MYC/SPI1/UBASH3B/DTX1…	77
BP	GO:1902105	regulation of leukocyte differentiation	65/1228	279/18723	1.02141e-19	4.75552e-17	3.31242e-17	MMP14/TGFB1/HCLS1/BCL6/CTLA4/FGL2/TESPA1/LEF1/ANXA1/CCL19/VNN1/DUSP10/PTPRC/TYROBP/EVI2B/IL7R/MITF/TREM2/TNF/GPR137B/BTK/SASH3/CSF1/TMEM176B/NCKAP1L/NFAM1/SLC46A2/ZFP36L1/ZFP36L2/CRTAM/NFKBID/IKZF3/ZNF683/C1QC/GATA2/CD83/CARD11/INPP5D/ADAM8/SFRP1/BAD/GAS6/TMEM176A/PTPN6/CD74/TCF7/FSTL3/JAK3/RUNX1/IL15RA/IL2RA/MAFB/KLF10/IL7/MYC/UBASH3B/DTX1/TESC/IL34/AXL/FOXJ1/TBX21/RARA/FES/TGFBR2	65
BP	GO:1903039	positive regulation of leukocyte cell-cell adhesion	59/1228	239/18723	2.61574e-19	1.12416e-16	7.83028e-17	ITGB2/SLAMF1/BCL6/TESPA1/LEF1/ICAM1/CD209/EBI3/HAVCR2/CD274/ANXA1/CCL19/CCL21/VNN1/CD3E/DUSP10/PTPRC/CCL5/IL7R/AIF1/TNF/SASH3/CD40LG/PTPN22/NCKAP1L/PDCD1LG2/ITGA4/SELP/NFKBID/PTAFR/CD83/CORO1A/CARD11/ADAM8/ALOX5/BAD/ST3GAL4/CCDC88B/PTPN6/LGALS1/TNFRSF13C/CD74/RASAL3/JAK3/ICOSLG/RUNX1/FYN/CD276/TNFSF13B/IL2RA/MAP3K8/SIRPA/LCK/IL7/CD44/FLOT2/SKAP1/RARA/TGFBR2	59
BP	GO:0030217	T cell differentiation	60/1228	257/18723	2.41842e-18	9.65124e-16	6.72249e-16	BCL6/CTLA4/FCER1G/FGL2/STAT6/TESPA1/CRACR2A/LEF1/ITK/ANXA1/CCL19/CTSL/TNFSF8/TRAF3IP2/VNN1/BATF/CD3E/CD3D/DUSP10/PTPRC/TP53/IL7R/SPN/SASH3/PTPN22/NCKAP1L/SLC46A2/ZFP36L1/ZFP36L2/CRTAM/NFKBID/ZNF683/RUNX2/CD83/CARD11/LFNG/ADAM8/BAD/KIT/CD74/EGR1/TCF7/JAK3/RUNX1/IL2RA/LCK/MAFB/PREX1/IL7/SPI1/PIK3CD/FZD7/DTX1/BCL3/FOXJ1/TBX21/RARA/PTGER4/DOCK2/TGFBR2	60
BP	GO:0050863	regulation of T cell activation	69/1228	329/18723	3.26544e-18	1.21627e-15	8.47181e-16	SLAMF1/BCL6/CTLA4/LAPTM5/FGL2/TESPA1/RAC2/LEF1/CD209/EBI3/HAVCR2/CD274/ANXA1/CCL19/CCL21/TNFSF8/VNN1/CD3E/DUSP10/PTPRC/CCL5/IL7R/AIF1/SPN/FGL1/SASH3/CD40LG/TNFAIP8L2/PTPN22/NCKAP1L/PDCD1LG2/SLC46A2/CRTAM/NFKBID/ZNF683/BTN2A2/CD83/CORO1A/LAT/CARD11/ADAM8/BAD/CCDC88B/PTPN6/LGALS1/TNFRSF13C/CD74/TCF7/RASAL3/JAK3/ICOSLG/RUNX1/FYN/CD276/TNFSF13B/IL2RA/MAP3K8/SIRPA/LCK/SDC4/IL7/LAX1/TNFRSF1B/DTX1/FOXJ1…	69
BP	GO:0070661	leukocyte proliferation	67/1228	318/18723	7.89995e-18	2.75856e-15	1.92145e-15	SLAMF1/BCL6/CTLA4/RAC2/LEF1/CD209/EBI3/HAVCR2/CD274/ANXA1/CCL19/TNFSF8/TNFAIP3/CD3E/MS4A1/PTPRC/TYROBP/CD79A/CCL5/TP53/CD180/IL7R/TREM2/AIF1/SPN/BTK/SASH3/CD40LG/PTPN22/CSF1/NCKAP1L/PDCD1LG2/CRTAM/IKZF3/CD19/BTN2A2/CDKN1A/CORO1A/CARD11/INPP5D/HHEX/CCDC88B/ELF4/AHR/PTPN6/TNFRSF13C/KIT/BST1/CD74/RASAL3/JAK3/ICOSLG/FYN/GREM1/CD276/TNFSF13B/IRS2/IL2RA/SDC4/IL7/TNFRSF1B/IL34/BAX/FOXJ1/DOCK2/TGFBR2/NFA…	67
BP	GO:0002263	cell activation involved in immune response	62/1228	279/18723	8.8262e-18	2.9007e-15	2.02046e-15	ITGB2/SLAMF1/TGFB1/BCL6/DOCK10/FCER1G/CD244/S100A13/FGL2/STAT6/RAC2/MFNG/CLEC7A/CRACR2A/LEF1/ICAM1/HAVCR2/ANXA1/PTK2B/CCL19/BATF/PTPRC/TYROBP/TP53/MILR1/CD180/CX3CR1/TREM2/SPN/ITGAM/BTK/CD40LG/NCKAP1L/FOXF1/NFKBID/PTAFR/ZNF683/CD19/LAT2/GATA2/CORO1A/LAT/LFNG/DOCK11/LRP1/LGALS1/KIT/CD74/SBNO2/JAK3/FGR/SPI1/POU2AF1/PIK3CD/BCL3/NMI/UNC13D/TBX21/RARA/PTGER4/DOCK2/FES	62
BP	GO:0050867	positive regulation of cell activation	79/1228	420/18723	1.00382e-17	3.11575e-15	2.17025e-15	ITGB2/SLAMF1/MMP14/TGFB1/BCL6/STAT6/TESPA1/CLEC7A/LEF1/CD209/EBI3/HAVCR2/CD274/ANXA1/CCL19/CCL21/VNN1/IL1RL1/PLEK/CD3E/DUSP10/PLA2G4A/PTPRC/TYROBP/CCL5/IL7R/TREM2/AIF1/ITGAM/BTK/SASH3/CD40LG/PTPN22/NCKAP1L/PDCD1LG2/SELP/NFKBID/PTAFR/GATA2/CDKN1A/CD83/CORO1A/CARD11/INPP5D/ADAM8/BAD/CTSC/CCDC88B/SH3KBP1/GAS6/PTPN6/LGALS1/CLEC4D/TNFRSF13C/BST1/CD74/PDGFRB/RASAL3/JAK3/ICOSLG/RUNX1/FYN/CD276/TNFSF13B/…	79
BP	GO:0002366	leukocyte activation involved in immune response	61/1228	275/18723	1.7897e-17	5.26265e-15	3.66566e-15	ITGB2/SLAMF1/TGFB1/BCL6/DOCK10/FCER1G/CD244/S100A13/FGL2/STAT6/RAC2/MFNG/CLEC7A/CRACR2A/LEF1/ICAM1/HAVCR2/ANXA1/PTK2B/CCL19/BATF/PTPRC/TYROBP/TP53/MILR1/CD180/CX3CR1/TREM2/SPN/ITGAM/BTK/CD40LG/NCKAP1L/FOXF1/NFKBID/PTAFR/ZNF683/CD19/LAT2/GATA2/CORO1A/LAT/LFNG/DOCK11/LGALS1/KIT/CD74/SBNO2/JAK3/FGR/SPI1/POU2AF1/PIK3CD/BCL3/NMI/UNC13D/TBX21/RARA/PTGER4/DOCK2/FES	61
BP	GO:0060326	cell chemotaxis	65/1228	310/18723	3.19473e-17	8.92447e-15	6.21627e-15	ITGB2/CXCR3/SLAMF1/TMSB4X/RARRES2/FCER1G/S100A14/S1PR1/PTN/RAC2/LEF1/PDGFRA/CXCL13/LOX/CXCL14/ANXA1/PTK2B/CCL19/CCL21/CCL22/CCL5/LGMN/CX3CR1/CCR8/CCRL2/CCR5/TREM1/GPSM3/AIF1/EDN1/CH25H/SERPINE1/CSF1/NCKAP1L/CORO1A/ACKR3/ADAM8/FGFR1/MTUS1/VEGFC/CXCL12/ALOX5/VEGFB/GAS6/KIT/SLIT2/BST1/CD74/PDGFRB/HBEGF/TRPM2/GREM1/EPHA2/PADI2/CAMK1D/ELMO2/PREX1/SPI1/PIK3CD/IL34/MMP28/CXCL16/SEMA5A/RIN3/HRH1	65
BP	GO:0002696	positive regulation of leukocyte activation	75/1228	409/18723	2.96117e-16	7.87812e-14	5.48744e-14	ITGB2/SLAMF1/MMP14/TGFB1/BCL6/STAT6/TESPA1/CLEC7A/LEF1/CD209/EBI3/HAVCR2/CD274/ANXA1/CCL19/CCL21/VNN1/IL1RL1/CD3E/DUSP10/PLA2G4A/PTPRC/TYROBP/CCL5/IL7R/TREM2/AIF1/ITGAM/BTK/SASH3/CD40LG/PTPN22/NCKAP1L/PDCD1LG2/NFKBID/PTAFR/GATA2/CDKN1A/CD83/CORO1A/CARD11/INPP5D/ADAM8/BAD/CTSC/CCDC88B/SH3KBP1/GAS6/PTPN6/LGALS1/CLEC4D/TNFRSF13C/BST1/CD74/RASAL3/JAK3/ICOSLG/RUNX1/FYN/CD276/TNFSF13B/IRS2/FGR/IL15RA/I…	75
BP	GO:0032943	mononuclear cell proliferation	61/1228	291/18723	3.10886e-16	7.89509e-14	5.49926e-14	SLAMF1/BCL6/CTLA4/RAC2/LEF1/CD209/EBI3/HAVCR2/CD274/ANXA1/CCL19/TNFSF8/CD3E/MS4A1/PTPRC/TYROBP/CD79A/CCL5/TP53/CD180/IL7R/AIF1/SPN/BTK/SASH3/CD40LG/PTPN22/CSF1/NCKAP1L/PDCD1LG2/CRTAM/IKZF3/CD19/BTN2A2/CDKN1A/CORO1A/CARD11/INPP5D/CCDC88B/ELF4/AHR/PTPN6/TNFRSF13C/BST1/CD74/RASAL3/JAK3/ICOSLG/FYN/CD276/TNFSF13B/IRS2/IL2RA/SDC4/IL7/TNFRSF1B/BAX/FOXJ1/DOCK2/TGFBR2/NFATC2	61
BP	GO:0042113	B cell activation	66/1228	334/18723	4.19025e-16	1.01787e-13	7.08986e-14	MMP14/TGFB1/SAMSN1/BCL6/CTLA4/DOCK10/LAPTM5/STAT6/MFNG/LEF1/PTK2B/TRAF3IP2/TNFAIP3/BATF/MS4A1/PTPRC/TYROBP/CD79A/TP53/CD180/IL7R/BTK/SASH3/CD40LG/NCKAP1L/NFAM1/ZFP36L1/ZFP36L2/ITGA4/IKZF3/CD19/PRKCB/LAT2/IRF2BP2/CDKN1A/CARD11/LFNG/INPP5D/HHEX/SFRP1/BAD/TBC1D10C/SH3KBP1/DOCK11/AHR/PTPN6/LGALS1/TNFRSF13C/KIT/BANK1/BST1/CD74/JAK3/ICOSLG/TNFSF13B/IRS2/IL7/SPI1/POU2AF1/LAX1/PIK3CD/BCL3/BAX/FOXJ1/TBX21…	66
BP	GO:0002685	regulation of leukocyte migration	50/1228	210/18723	7.14023e-16	1.65091e-13	1.14993e-13	CXCR3/SLAMF1/MMP14/RARRES2/APOD/S100A14/PTN/RAC2/CXCL13/ICAM1/ANXA1/PTK2B/CCL19/CCL21/CCL5/ITGA2/LGMN/CX3CR1/TREM2/GPSM3/AIF1/TNF/EDN1/SPN/SERPINE1/CSF1/NCKAP1L/ITGA4/SELP/PTAFR/ADAM8/MTUS1/VEGFC/CXCL12/VEGFB/ST3GAL4/XG/CD99/GAS6/SLIT2/BST1/CD74/GREM1/PADI2/CAMK1D/SPI1/IL34/MMP28/PTGER4/RIN3	50
BP	GO:0046651	lymphocyte proliferation	60/1228	288/18723	7.38729e-16	1.65091e-13	1.14993e-13	SLAMF1/BCL6/CTLA4/RAC2/LEF1/CD209/EBI3/HAVCR2/CD274/ANXA1/CCL19/TNFSF8/CD3E/MS4A1/PTPRC/TYROBP/CD79A/CCL5/TP53/CD180/IL7R/AIF1/SPN/BTK/SASH3/CD40LG/PTPN22/NCKAP1L/PDCD1LG2/CRTAM/IKZF3/CD19/BTN2A2/CDKN1A/CORO1A/CARD11/INPP5D/CCDC88B/ELF4/AHR/PTPN6/TNFRSF13C/BST1/CD74/RASAL3/JAK3/ICOSLG/FYN/CD276/TNFSF13B/IRS2/IL2RA/SDC4/IL7/TNFRSF1B/BAX/FOXJ1/DOCK2/TGFBR2/NFATC2	60
BP	GO:0019221	cytokine-mediated signaling pathway	81/1228	472/18723	9.77223e-16	2.0999e-13	1.46267e-13	CXCR3/TMSB4X/LAPTM5/FCER1G/ACKR1/KRT8/KRT18/STAT6/TXK/CXCL13/EBI3/PTK2B/CCL19/CCL21/TRAF3IP2/IFNGR1/TNFAIP3/IL1RL1/IL1RN/ISG15/PTPRC/CCL22/CCL5/TP53/IL7R/CX3CR1/CCR8/CCRL2/CCR5/TREM2/TNF/EDN1/IL21R/IL2RG/CSF1/IL10RA/GPR35/ACKR3/FAS/CXCL12/BAD/FZD4/IL13RA1/TRAF2/IL3RA/GAS6/PLP2/GFI1/F3/IFNAR2/PTPN6/TNFRSF13C/KIT/SLIT2/CD74/EGR1/TYK2/JAK3/MX1/PADI2/AGPAT2/TNFSF13B/TNFRSF19/IL15RA/IL2RA/HCK/SAMHD1/I…	81
BP	GO:0001819	positive regulation of cytokine production	80/1228	467/18723	1.63959e-15	3.39274e-13	2.36319e-13	CHI3L1/SLAMF1/TGFB1/LAPTM5/FCER1G/CD244/S100A13/CLEC7A/CLEC6A/TXK/EBI3/CD14/IL17B/HAVCR2/ITK/CD274/ANXA1/CCL19/IFNGR1/BATF/IL1RL1/SULF1/CD3E/ISG15/PTPRC/TYROBP/SERPINF2/SCIMP/TRIM16/TREM2/GPSM3/AIF1/TNF/SPN/SASH3/CD40LG/PQBP1/SERPINE1/PTPN22/NFAM1/SMAD3/CRTAM/PTAFR/TLR8/FLOT1/CD83/CARD11/AFAP1L2/ADAM8/ADRA2A/HK1/FRMD8/CCDC88B/TRAF2/F3/LRP1/PANX2/KIT/SPON2/CD74/EGR1/RUNX1/RFTN1/AKAP12/NFATC4/CD276…	80
BP	GO:0070663	regulation of leukocyte proliferation	54/1228	245/18723	1.7172e-15	3.42642e-13	2.38665e-13	SLAMF1/BCL6/CTLA4/RAC2/CD209/EBI3/HAVCR2/CD274/ANXA1/CCL19/TNFSF8/TNFAIP3/CD3E/PTPRC/TYROBP/CCL5/AIF1/SPN/BTK/SASH3/CD40LG/PTPN22/CSF1/NCKAP1L/PDCD1LG2/CRTAM/IKZF3/BTN2A2/CDKN1A/CORO1A/CARD11/INPP5D/HHEX/CCDC88B/AHR/PTPN6/TNFRSF13C/BST1/CD74/RASAL3/JAK3/ICOSLG/GREM1/CD276/TNFSF13B/IRS2/IL2RA/SDC4/IL7/TNFRSF1B/IL34/FOXJ1/TGFBR2/NFATC2	54
BP	GO:0045619	regulation of lymphocyte differentiation	44/1228	174/18723	3.80433e-15	7.32923e-13	5.10512e-13	MMP14/BCL6/CTLA4/FGL2/TESPA1/LEF1/ANXA1/CCL19/VNN1/DUSP10/PTPRC/IL7R/BTK/SASH3/NCKAP1L/NFAM1/SLC46A2/ZFP36L1/ZFP36L2/CRTAM/NFKBID/IKZF3/ZNF683/CD83/CARD11/INPP5D/ADAM8/SFRP1/BAD/GAS6/PTPN6/CD74/TCF7/JAK3/RUNX1/IL15RA/IL2RA/IL7/DTX1/AXL/FOXJ1/TBX21/RARA/TGFBR2	44
BP	GO:0002687	positive regulation of leukocyte migration	38/1228	135/18723	6.81299e-15	1.26881e-12	8.83776e-13	SLAMF1/MMP14/RARRES2/S100A14/PTN/RAC2/CXCL13/ICAM1/PTK2B/CCL19/CCL21/CCL5/ITGA2/LGMN/CX3CR1/TREM2/GPSM3/AIF1/TNF/EDN1/SPN/SERPINE1/CSF1/NCKAP1L/ITGA4/SELP/PTAFR/ADAM8/VEGFC/CXCL12/VEGFB/XG/CD99/GAS6/CD74/CAMK1D/SPI1/IL34	38
BP	GO:0030595	leukocyte chemotaxis	51/1228	230/18723	8.12615e-15	1.46454e-12	1.02011e-12	ITGB2/CXCR3/SLAMF1/RARRES2/FCER1G/S100A14/S1PR1/PTN/RAC2/CXCL13/ANXA1/PTK2B/CCL19/CCL21/CCL22/CCL5/LGMN/CX3CR1/CCR5/TREM1/GPSM3/AIF1/EDN1/CH25H/SERPINE1/CSF1/NCKAP1L/CORO1A/ADAM8/MTUS1/VEGFC/CXCL12/ALOX5/VEGFB/GAS6/KIT/SLIT2/BST1/CD74/TRPM2/GREM1/PADI2/CAMK1D/PREX1/SPI1/PIK3CD/IL34/MMP28/CXCL16/RIN3/HRH1	51
BP	GO:0050870	positive regulation of T cell activation	49/1228	216/18723	1.06883e-14	1.86611e-12	1.29982e-12	SLAMF1/BCL6/TESPA1/LEF1/CD209/EBI3/HAVCR2/CD274/ANXA1/CCL19/CCL21/VNN1/CD3E/DUSP10/PTPRC/CCL5/IL7R/AIF1/SASH3/CD40LG/PTPN22/NCKAP1L/PDCD1LG2/NFKBID/CD83/CORO1A/CARD11/ADAM8/BAD/CCDC88B/PTPN6/LGALS1/TNFRSF13C/CD74/RASAL3/JAK3/ICOSLG/RUNX1/FYN/CD276/TNFSF13B/IL2RA/MAP3K8/SIRPA/LCK/IL7/FLOT2/RARA/TGFBR2	49
BP	GO:0032944	regulation of mononuclear cell proliferation	50/1228	227/18723	1.97436e-14	3.34266e-12	2.3283e-12	SLAMF1/BCL6/CTLA4/RAC2/CD209/EBI3/HAVCR2/CD274/ANXA1/CCL19/TNFSF8/CD3E/PTPRC/TYROBP/CCL5/AIF1/SPN/BTK/SASH3/CD40LG/PTPN22/CSF1/NCKAP1L/PDCD1LG2/CRTAM/IKZF3/BTN2A2/CDKN1A/CORO1A/CARD11/INPP5D/CCDC88B/AHR/PTPN6/TNFRSF13C/BST1/CD74/RASAL3/JAK3/ICOSLG/CD276/TNFSF13B/IRS2/IL2RA/SDC4/IL7/TNFRSF1B/FOXJ1/TGFBR2/NFATC2	50
BP	GO:0007162	negative regulation of cell adhesion	59/1228	303/18723	3.09716e-14	5.08936e-12	3.54495e-12	MMP14/TGFB1/APOD/BCL6/CTLA4/LAPTM5/FGL2/ERBB3/HAVCR2/CD274/ANXA1/CCL21/IL1RN/SNAI2/PTPRC/SPN/FGL1/SERPINE1/TACSTD2/TNFAIP8L2/PTPN22/PLXNC1/NCKAP1L/PDCD1LG2/CRTAM/ANGPT2/BTN2A2/ZNF703/CXCL12/FZD4/PODXL/LRP1/ARHGDIB/PTPN6/LGALS1/FBLN1/CD74/SPOCK1/SEMA6A/JAK3/ACER2/KLF4/RUNX1/AKNA/IL2RA/SDC4/SERPINE2/SPI1/UBASH3B/LAX1/FZD7/CORO1C/DTX1/ADAMTS18/FXYD5/FOXJ1/TBX21/SEMA5A/PLXNB1	59
BP	GO:0050670	regulation of lymphocyte proliferation	49/1228	225/18723	5.73313e-14	9.15172e-12	6.37456e-12	SLAMF1/BCL6/CTLA4/RAC2/CD209/EBI3/HAVCR2/CD274/ANXA1/CCL19/TNFSF8/CD3E/PTPRC/TYROBP/CCL5/AIF1/SPN/BTK/SASH3/CD40LG/PTPN22/NCKAP1L/PDCD1LG2/CRTAM/IKZF3/BTN2A2/CDKN1A/CORO1A/CARD11/INPP5D/CCDC88B/AHR/PTPN6/TNFRSF13C/BST1/CD74/RASAL3/JAK3/ICOSLG/CD276/TNFSF13B/IRS2/IL2RA/SDC4/IL7/TNFRSF1B/FOXJ1/TGFBR2/NFATC2	49
BP	GO:0030198	extracellular matrix organization	58/1228	301/18723	8.23313e-14	1.22306e-11	8.51913e-12	MMP14/TGFB1/MMP9/CTSK/CTSS/PDGFRA/LOX/SULF1/MMP16/MMP7/DPT/PDPN/CRISPLD2/MMP2/SERPINF2/FKBP10/TNF/SMAD3/ANTXR1/MPV17/FOXF1/CRTAP/ADAMTS4/FLOT1/MMP25/FSCN1/NFKB2/ADAM8/EFEMP2/LTBP3/GAS6/AEBP1/LRP1/MMP19/PTX3/FBLN1/RUNX1/COL27A1/COL12A1/PAPLN/ANXA2/NID2/GREM1/SULF2/COL14A1/TNFRSF1B/ELF3/MMP11/ADAMTS18/BCL3/SOX9/MMP28/MFAP4/P3H4/SH3PXD2B/ADAMTS7/FBLN5/FURIN	58
BP	GO:0071674	mononuclear cell migration	45/1228	196/18723	8.28063e-14	1.22306e-11	8.51913e-12	CXCR3/SLAMF1/RARRES2/APOD/S100A14/S1PR1/MYO1G/CXCL13/ICAM1/ANXA1/PTK2B/CCL19/CCL21/CCL22/CCL5/LGMN/CX3CR1/CCR5/AIF1/TNF/SPN/CH25H/SERPINE1/CSF1/ITGA4/CRTAM/ADAM8/CXCL12/ALOX5/XG/CD99/GAS6/ITGB7/EPS8/SLIT2/TRPM2/GREM1/PADI2/SIRPA/SPI1/PIK3CD/IL34/CXCL16/TBX21/ASB2	45
BP	GO:0051251	positive regulation of lymphocyte activation	65/1228	362/18723	8.31866e-14	1.22306e-11	8.51913e-12	SLAMF1/MMP14/TGFB1/BCL6/STAT6/TESPA1/CLEC7A/LEF1/CD209/EBI3/HAVCR2/CD274/ANXA1/CCL19/CCL21/VNN1/CD3E/DUSP10/PTPRC/TYROBP/CCL5/IL7R/AIF1/BTK/SASH3/CD40LG/PTPN22/NCKAP1L/PDCD1LG2/NFKBID/CDKN1A/CD83/CORO1A/CARD11/INPP5D/ADAM8/BAD/CCDC88B/SH3KBP1/GAS6/PTPN6/LGALS1/TNFRSF13C/BST1/CD74/RASAL3/JAK3/ICOSLG/RUNX1/FYN/CD276/TNFSF13B/IRS2/IL15RA/IL2RA/MAP3K8/SIRPA/LCK/IL7/AXL/FLOT2/TBX21/RARA/TGFBR2/NFATC2	65
BP	GO:0031589	cell-substrate adhesion	65/1228	363/18723	9.50522e-14	1.33503e-11	9.29907e-12	ITGB2/MMP14/CD96/APOD/BCL6/FN1/MYO1G/PTN/RAC2/EDIL3/PTK2B/CCL21/SIGLEC1/CD3E/LYVE1/PDPN/ITGA2/ADAM9/PLAU/ARL2/SERPINE1/TACSTD2/CSF1/SMAD3/ANTXR1/ITGA4/FOXF1/ANGPT2/SNED1/CORO1A/EMP2/SFRP1/FERMT3/EFEMP2/FZD4/RHOD/GAS6/S100A10/EFNA1/ZYX/EPDR1/ITGA5/ITGB7/LRP1/LGALS1/PARVB/PARVG/FBLN1/BST1/SPOCK1/ACER2/NID2/GREM1/LAMA5/SDC4/PREX1/CD44/ILK/FZD7/CORO1C/AXL/UNC13D/ITGB4/SKAP1/FBLN5	65
BP	GO:0043062	extracellular structure organization	58/1228	302/18723	9.55814e-14	1.33503e-11	9.29907e-12	MMP14/TGFB1/MMP9/CTSK/CTSS/PDGFRA/LOX/SULF1/MMP16/MMP7/DPT/PDPN/CRISPLD2/MMP2/SERPINF2/FKBP10/TNF/SMAD3/ANTXR1/MPV17/FOXF1/CRTAP/ADAMTS4/FLOT1/MMP25/FSCN1/NFKB2/ADAM8/EFEMP2/LTBP3/GAS6/AEBP1/LRP1/MMP19/PTX3/FBLN1/RUNX1/COL27A1/COL12A1/PAPLN/ANXA2/NID2/GREM1/SULF2/COL14A1/TNFRSF1B/ELF3/MMP11/ADAMTS18/BCL3/SOX9/MMP28/MFAP4/P3H4/SH3PXD2B/ADAMTS7/FBLN5/FURIN	58
BP	GO:0032103	positive regulation of response to external stimulus	72/1228	427/18723	1.00517e-13	1.36972e-11	9.5407e-12	SLAMF1/TMSB4X/RARRES2/TGFB1/XRCC5/S100A14/S1PR1/PTN/RAC2/CLEC7A/CLEC6A/TXK/CXCL13/HAVCR2/PTK2B/CCL19/CCL21/CDK19/IL1RL1/ALOX5AP/TGM2/TYROBP/CCL5/SERPINF2/SCIMP/CD180/ITGA2/LGMN/CX3CR1/TREM2/GPSM3/AIF1/TNF/EDN1/LY86/BTK/SH2D1A/PQBP1/SERPINE1/CSF1/NCKAP1L/SMAD3/CRTAM/TLR8/ADAM8/FGFR1/VEGFC/CXCL12/VEGFB/CTSC/GAS6/PTGER3/F3/LRP1/SLIT2/CD74/PDGFRB/MATR3/FYN/SASH1/C2CD4B/CAMK1D/HCK/SPI1/PTGS2/IL34/TRAD…	72
BP	GO:0045229	external encapsulating structure organization	58/1228	304/18723	1.2852e-13	1.70962e-11	1.19082e-11	MMP14/TGFB1/MMP9/CTSK/CTSS/PDGFRA/LOX/SULF1/MMP16/MMP7/DPT/PDPN/CRISPLD2/MMP2/SERPINF2/FKBP10/TNF/SMAD3/ANTXR1/MPV17/FOXF1/CRTAP/ADAMTS4/FLOT1/MMP25/FSCN1/NFKB2/ADAM8/EFEMP2/LTBP3/GAS6/AEBP1/LRP1/MMP19/PTX3/FBLN1/RUNX1/COL27A1/COL12A1/PAPLN/ANXA2/NID2/GREM1/SULF2/COL14A1/TNFRSF1B/ELF3/MMP11/ADAMTS18/BCL3/SOX9/MMP28/MFAP4/P3H4/SH3PXD2B/ADAMTS7/FBLN5/FURIN	58
BP	GO:0030183	B cell differentiation	37/1228	141/18723	1.7099e-13	2.17118e-11	1.51232e-11	MMP14/BCL6/DOCK10/MFNG/PTK2B/TRAF3IP2/MS4A1/PTPRC/CD79A/TP53/BTK/CD40LG/NCKAP1L/NFAM1/ZFP36L1/ZFP36L2/ITGA4/IKZF3/CD19/IRF2BP2/CARD11/LFNG/INPP5D/HHEX/SFRP1/BAD/DOCK11/PTPN6/LGALS1/KIT/JAK3/TNFSF13B/IL7/SPI1/POU2AF1/BCL3/BAX	37
BP	GO:0050921	positive regulation of chemotaxis	37/1228	141/18723	1.7099e-13	2.17118e-11	1.51232e-11	SLAMF1/TMSB4X/RARRES2/TGFB1/S100A14/S1PR1/PTN/RAC2/CXCL13/PTK2B/CCL19/CCL21/CCL5/ITGA2/LGMN/CX3CR1/TREM2/GPSM3/AIF1/EDN1/SERPINE1/CSF1/NCKAP1L/SMAD3/FGFR1/VEGFC/CXCL12/VEGFB/GAS6/F3/SLIT2/CD74/PDGFRB/CAMK1D/SPI1/IL34/SEMA5A	37
BP	GO:1902107	positive regulation of leukocyte differentiation	39/1228	157/18723	2.59381e-13	3.15036e-11	2.19436e-11	MMP14/TGFB1/HCLS1/BCL6/TESPA1/LEF1/ANXA1/CCL19/VNN1/DUSP10/PTPRC/TYROBP/EVI2B/IL7R/TREM2/TNF/BTK/SASH3/CSF1/NCKAP1L/ZFP36L1/NFKBID/CD83/INPP5D/ADAM8/BAD/GAS6/CD74/RUNX1/IL15RA/IL2RA/KLF10/IL7/TESC/IL34/AXL/RARA/FES/TGFBR2	39
BP	GO:1903708	positive regulation of hemopoiesis	39/1228	157/18723	2.59381e-13	3.15036e-11	2.19436e-11	MMP14/TGFB1/HCLS1/BCL6/TESPA1/LEF1/ANXA1/CCL19/VNN1/DUSP10/PTPRC/TYROBP/EVI2B/IL7R/TREM2/TNF/BTK/SASH3/CSF1/NCKAP1L/ZFP36L1/NFKBID/CD83/INPP5D/ADAM8/BAD/GAS6/CD74/RUNX1/IL15RA/IL2RA/KLF10/IL7/TESC/IL34/AXL/RARA/FES/TGFBR2	39
BP	GO:0050866	negative regulation of cell activation	46/1228	210/18723	2.71462e-13	3.22693e-11	2.24769e-11	SAMSN1/BCL6/CTLA4/LAPTM5/FGL2/PDGFRA/HAVCR2/CD274/ANXA1/TNFAIP3/PTPRC/TYROBP/MILR1/TREM2/SPN/FGL1/BTK/TNFAIP8L2/PTPN22/NCKAP1L/PDCD1LG2/CRTAM/FOXF1/BTN2A2/INPP5D/SFRP1/TBC1D10C/PTPN6/BANK1/CD74/JAK3/RUNX1/FGR/IL2RA/SDC4/SERPINE2/SPI1/UBASH3B/LAX1/DTX1/ADAMTS18/AXL/APOE/CYGB/FOXJ1/TBX21	46
BP	GO:0002274	myeloid leukocyte activation	47/1228	223/18723	6.65901e-13	7.75081e-11	5.39876e-11	ITGB2/SLAMF1/LTBR/C1QA/FCER1G/S100A13/RAC2/HAVCR2/TRAF3IP2/IFNGR1/BATF/IL1RL1/PLA2G4A/PTPRC/TYROBP/CCL5/MILR1/CX3CR1/TREM2/AIF1/TNF/ITGAM/ADAM9/GPR137B/BTK/CSF1/FOXF1/PTAFR/LAT2/GATA2/LAT/CTSC/CLEC4D/KIT/CD74/SBNO2/FGR/PREX1/SPI1/PIK3CD/BATF3/NMI/SPHK1/UNC13D/DOCK2/FES/TGFBR2	47
BP	GO:0001667	ameboidal-type cell migration	75/1228	475/18723	9.48581e-13	1.08158e-10	7.53363e-11	TMSB4X/TGFB1/CTSH/MMP9/TIMP1/ACVR1/NRP2/FN1/S100A2/GADD45A/PTN/CXCL13/ANXA1/GLIPR2/PTK2B/FGF7/RHOJ/VASH1/DUSP10/SERPINF1/ITGA2/CLEC14A/LGMN/HYAL1/TNF/EDN1/ADAM9/ARID5B/TACSTD2/ITGA4/ANGPT2/GATA2/EMP2/EPHB4/FGFR1/VEGFC/SGPL1/GPC3/SRPX2/ARHGAP4/EFNA1/ITGB7/ARHGDIB/SH3BP1/KIT/SLIT2/HBEGF/SEMA6A/KANK2/GIPC1/KLF4/SASH1/AKAP12/GREM1/EPHA2/ATOH8/DAB2IP/LAMA5/SDC4/ENPP2/ILK/PIK3CD/PTGS2/CORO1C/ZEB2/APOE/…	75
BP	GO:0002688	regulation of leukocyte chemotaxis	33/1228	122/18723	1.38759e-12	1.5505e-10	1.07999e-10	SLAMF1/RARRES2/S100A14/PTN/RAC2/CXCL13/PTK2B/CCL19/CCL21/CCL5/LGMN/CX3CR1/GPSM3/AIF1/EDN1/SERPINE1/CSF1/NCKAP1L/MTUS1/VEGFC/CXCL12/VEGFB/GAS6/SLIT2/BST1/CD74/GREM1/PADI2/CAMK1D/SPI1/IL34/MMP28/RIN3	33
BP	GO:0042060	wound healing	69/1228	422/18723	1.49395e-12	1.63661e-10	1.13997e-10	TGFB1/TIMP1/PROS1/CLDN1/FN1/FCER1G/ERBB3/CLEC7A/TXK/PDGFRA/LOX/ANXA1/TNFAIP3/F2RL2/TGFB3/PLEK/PDPN/PLA2G4A/PLAUR/SERPINF2/FKBP10/ITGA2/CLIC1/TNF/EDN1/PLAT/PLAU/CD40LG/SERPINE1/SMAD3/SELP/ENTPD1/GATA2/CDKN1A/F13A1/MYOF/ADRA2A/ALOX5/FERMT3/ST3GAL4/SYT7/WAS/GAS6/F3/TFPI2/ITGA5/ELK3/PTPN6/FBLN1/PDGFRB/HBEGF/ANXA2/ENTPD2/LCK/SDC4/SERPINE2/DGKZ/CD44/TSKU/ILK/UBASH3B/MCAM/FZD7/ADAMTS18/CDH3/AXL/APOE/EVP…	69
BP	GO:0033627	cell adhesion mediated by integrin	25/1228	72/18723	1.5943e-12	1.71295e-10	1.19314e-10	ITGB2/CXCL13/ICAM1/IFT74/CCL21/SNAI2/CD3E/CCL5/ITGA2/ADAM9/PLAU/SERPINE1/NCKAP1L/ITGA4/FERMT3/EFNA1/PODXL/ITGA5/ITGB7/PTPN6/ACER2/EPHA2/TESC/ITGB4/SKAP1	25
BP	GO:0032946	positive regulation of mononuclear cell proliferation	35/1228	138/18723	2.26418e-12	2.38679e-10	1.6625e-10	SLAMF1/BCL6/CD209/EBI3/HAVCR2/CD274/ANXA1/CCL19/CD3E/PTPRC/CCL5/AIF1/SASH3/CD40LG/PTPN22/CSF1/NCKAP1L/PDCD1LG2/CDKN1A/CORO1A/CARD11/CCDC88B/TNFRSF13C/BST1/CD74/RASAL3/JAK3/ICOSLG/CD276/TNFSF13B/IRS2/IL2RA/IL7/TGFBR2/NFATC2	35
BP	GO:0032963	collagen metabolic process	30/1228	104/18723	2.36316e-12	2.44499e-10	1.70304e-10	MMP14/TGFB1/MMP9/CTSK/CTSS/CTSL/TGFB3/MMP16/MMP7/MMP2/SERPINF2/ITGA2/TRAM2/MMP25/CIITA/P3H2/MMP19/PDGFRB/CTSB/RUNX1/LARP6/VIM/MMP11/RCN3/KLK6/CYGB/MMP28/MFAP4/P3H4/FURIN	30
BP	GO:0032496	response to lipopolysaccharide	60/1228	343/18723	2.42648e-12	2.46486e-10	1.71688e-10	TGFB1/CD96/CLDN1/S100A14/KCNJ8/CXCL13/ICAM1/CD14/HAVCR2/CD274/ABCA1/CDK19/TNFAIP3/MRC1/DUSP10/ZFP36/CCL5/SCIMP/CD68/CD180/CX3CR1/CCR5/TREM2/TNF/EDN1/LY86/ADAM9/SERPINE1/PTPN22/PDCD1LG2/GGT7/IL10RA/SELP/PTAFR/SGMS1/NFKB2/GFI1/TSPO/SPON2/HNRNPA0/SBNO2/AKAP8/HPGD/SASH1/AKAP12/SOD2/CMPK2/DAB2IP/PTGES/GJB2/VIM/SIRPA/HCK/SPI1/TNFRSF1B/PTGS2/AXL/PLSCR3/RARA/PTGER4	60
BP	GO:0050920	regulation of chemotaxis	46/1228	223/18723	2.61458e-12	2.60851e-10	1.81693e-10	SLAMF1/TMSB4X/RARRES2/TGFB1/S100A14/S1PR1/PTN/RAC2/PDGFRA/CXCL13/PTK2B/CCL19/CCL21/CCL5/ITGA2/LGMN/CX3CR1/TREM2/GPSM3/AIF1/EDN1/SERPINE1/CSF1/NCKAP1L/SMAD3/ANGPT2/FGFR1/MTUS1/VEGFC/CXCL12/VEGFB/GAS6/F3/SLIT2/BST1/CD74/PDGFRB/SEMA6A/GREM1/PADI2/CAMK1D/SPI1/IL34/MMP28/SEMA5A/RIN3	46
BP	GO:0002573	myeloid leukocyte differentiation	44/1228	208/18723	3.17786e-12	3.11486e-10	2.16963e-10	TGFB1/MMP9/LTBR/HCLS1/LEF1/JUNB/CCL19/BATF/TYROBP/EVI2B/MITF/TREM2/TNF/GPR137B/CSF1/ZFP36L1/C1QC/GATA2/INPP5D/SFRP1/GPC3/GAB3/PDE1B/KIT/CD74/SBNO2/FSTL3/RUNX1/ANXA2/EPHA2/MAFB/KLF10/MYC/SPI1/UBASH3B/PIK3CD/BATF3/TESC/IL34/CBFA2T3/MED1/RARA/FES/TGFBR2	44
BP	GO:0002443	leukocyte mediated immunity	70/1228	440/18723	3.86507e-12	3.72313e-10	2.59331e-10	ITGB2/SLAMF1/TGFB1/CTSH/CD96/BCL6/C1QB/C1QA/FCER1G/SLAMF7/CD1E/S100A13/MYO1G/STAT6/RAC2/CLEC7A/C1R/ICAM1/HAVCR2/TRAF3IP2/BATF/PTPRC/TYROBP/SCIMP/MILR1/C7/IL7R/CX3CR1/TREM2/TREM1/C2/TNF/ITGAM/PRF1/BTK/SH2D1A/SASH3/CD40LG/NCKAP1L/CRTAM/FOXF1/PTAFR/C1QC/CD19/LAT2/TLR8/GATA2/CORO1A/EMP2/LAT/INPP5D/CTSC/TRAF2/WAS/AHR/PTPN6/KIT/SPON2/CD74/JAK3/RFTN1/FGR/SPI1/TNFRSF1B/PIK3CD/BCL3/FOXJ1/UNC13D/TBX21/FES	70
BP	GO:0002460	adaptive immune response based on somatic recombination of immune receptors built from immunoglobulin superfamily domains	61/1228	356/18723	3.97106e-12	3.7604e-10	2.61927e-10	SLAMF1/TGFB1/CTSH/BCL6/KLHL6/C1QB/C1QA/FCER1G/CD1E/MYO1G/STAT6/CLEC7A/CLEC6A/C1R/CRACR2A/LEF1/CXCL13/ICAM1/EBI3/HAVCR2/CD274/ANXA1/CCL19/TRAF3IP2/TNFAIP3/BATF/IL1RL1/PLA2G4A/PTPRC/C7/IL7R/TREM2/C2/TNF/SPN/PRF1/BTK/SASH3/CD40LG/NCKAP1L/NFKBID/C1QC/CD19/TLR8/EMP2/INPP5D/NFKB2/CTSC/TRAF2/WAS/AHR/PTPN6/CD74/JAK3/RFTN1/TNFSF13B/TNFRSF1B/BCL3/FOXJ1/UNC13D/TBX21	61
BP	GO:0097529	myeloid leukocyte migration	45/1228	220/18723	6.13446e-12	5.71221e-10	3.97879e-10	ITGB2/SLAMF1/MMP14/RARRES2/FCER1G/S100A14/RAC2/CXCL13/ANXA1/PTK2B/CCL19/CCL21/CCL22/CCL5/LGMN/CX3CR1/TREM2/TREM1/AIF1/EDN1/SERPINE1/CSF1/NCKAP1L/ADAM8/MTUS1/VEGFC/CXCL12/VEGFB/XG/CD99/KIT/SLIT2/BST1/CD74/GREM1/CAMK1D/SIRPA/PREX1/SPI1/PIK3CD/IL34/MMP28/PTGER4/RIN3/HRH1	45
BP	GO:0070665	positive regulation of leukocyte proliferation	36/1228	150/18723	6.37713e-12	5.84082e-10	4.06838e-10	SLAMF1/BCL6/CD209/EBI3/HAVCR2/CD274/ANXA1/CCL19/CD3E/PTPRC/CCL5/AIF1/SASH3/CD40LG/PTPN22/CSF1/NCKAP1L/PDCD1LG2/CDKN1A/CORO1A/CARD11/CCDC88B/TNFRSF13C/BST1/CD74/RASAL3/JAK3/ICOSLG/CD276/TNFSF13B/IRS2/IL2RA/IL7/IL34/TGFBR2/NFATC2	36
BP	GO:0071216	cellular response to biotic stimulus	48/1228	246/18723	7.2767e-12	6.55724e-10	4.56739e-10	TGFB1/TXNIP/CLEC7A/CXCL13/ICAM1/CD14/HAVCR2/CD274/ABCA1/CDK19/TNFAIP3/MRC1/ZFP36/CCL5/SCIMP/CD68/TP53/CD180/CX3CR1/CCR5/TREM2/TNF/LY86/ADAM9/BTK/SERPINE1/PTPN22/PDCD1LG2/PTAFR/SGMS1/GFI1/TSPO/WFS1/SPON2/SBNO2/AKAP8/SASH1/CMPK2/DAB2IP/VIM/SIRPA/HCK/SPI1/TNFRSF1B/SIRT2/AXL/PLSCR3/RARA	48
BP	GO:0050671	positive regulation of lymphocyte proliferation	34/1228	137/18723	9.00172e-12	7.98296e-10	5.56046e-10	SLAMF1/BCL6/CD209/EBI3/HAVCR2/CD274/ANXA1/CCL19/CD3E/PTPRC/CCL5/AIF1/SASH3/CD40LG/PTPN22/NCKAP1L/PDCD1LG2/CDKN1A/CORO1A/CARD11/CCDC88B/TNFRSF13C/BST1/CD74/RASAL3/JAK3/ICOSLG/CD276/TNFSF13B/IRS2/IL2RA/IL7/TGFBR2/NFATC2	34
BP	GO:0002237	response to molecule of bacterial origin	61/1228	363/18723	9.30346e-12	8.12163e-10	5.65706e-10	TGFB1/CD96/CLDN1/S100A14/KCNJ8/CXCL13/ICAM1/CD14/HAVCR2/CD274/ABCA1/CDK19/TNFAIP3/MRC1/DUSP10/ZFP36/CCL5/SCIMP/CD68/CD180/CX3CR1/CCR5/TREM2/TNF/EDN1/LY86/ADAM9/SERPINE1/PTPN22/PDCD1LG2/GGT7/IL10RA/SELP/PTAFR/SGMS1/NFKB2/GFI1/TSPO/SPON2/HNRNPA0/SBNO2/AKAP8/HPGD/SASH1/AKAP12/SOD2/CMPK2/DAB2IP/PTGES/GJB2/VIM/SIRPA/HCK/SPI1/TNFRSF1B/PTGS2/SIRT2/AXL/PLSCR3/RARA/PTGER4	61
BP	GO:0042098	T cell proliferation	42/1228	199/18723	1.06937e-11	9.19163e-10	6.40235e-10	SLAMF1/CTLA4/RAC2/CD209/EBI3/HAVCR2/CD274/ANXA1/CCL19/TNFSF8/CD3E/PTPRC/CCL5/TP53/AIF1/SPN/SASH3/CD40LG/PTPN22/NCKAP1L/PDCD1LG2/CRTAM/BTN2A2/CORO1A/CARD11/CCDC88B/ELF4/PTPN6/TNFRSF13C/RASAL3/JAK3/ICOSLG/FYN/CD276/TNFSF13B/IL2RA/SDC4/TNFRSF1B/BAX/FOXJ1/DOCK2/TGFBR2	42
BP	GO:0002253	activation of immune response	61/1228	375/18723	3.76033e-11	3.13567e-09	2.18412e-09	KLHL6/CTLA4/XRCC5/LAPTM5/C1QB/C1QA/FCER1G/MYO1G/TESPA1/CLEC7A/CLEC6A/C1R/TXK/ITK/RNF31/CD3E/MS4A1/PTPRC/TYROBP/CD79A/C7/TREM2/C2/BTK/SH2D1A/PQBP1/CFP/PTPN22/NCKAP1L/NFAM1/NFKBID/C1QC/CD19/PRKCB/LAT2/CD247/BTN2A2/CFB/CARD11/LIMK1/PVRIG/INPP5D/PTPN6/BANK1/MATR3/UBASH3A/ICOSLG/FYN/RFTN1/CD276/FGR/HCK/LCK/DGKZ/LAX1/PIK3CD/CMTM3/BAX/MFAP4/SKAP1/NFATC2	61
BP	GO:0018108	peptidyl-tyrosine phosphorylation	61/1228	375/18723	3.76033e-11	3.13567e-09	2.18412e-09	ITGB2/TGFB1/SAMSN1/HCLS1/ACVR1/ERBB3/GPRC5A/CLEC7A/CLEC6A/TXK/PDGFRA/ICAM1/ITK/PTK2B/FGF7/CD3E/PTPRC/CCL5/TP53/MAP2K6/TREM2/TNF/INPP5F/BTK/NCF1/EPHB4/AFAP1L2/ADRA2A/FGFR1/SFRP1/GAS6/EFNA1/EPHB6/ITGA5/PTPN6/KIT/BANK1/BST1/CD74/PDGFRB/HBEGF/MATK/TYK2/JAK3/FYN/GREM1/EPHA2/EFEMP1/FGR/HCK/LCK/ENPP2/IL7/LRP4/CD44/IL34/AXL/SOCS3/DLG4/IGF1R/FES	61
BP	GO:0018212	peptidyl-tyrosine modification	61/1228	378/18723	5.26894e-11	4.32906e-09	3.01537e-09	ITGB2/TGFB1/SAMSN1/HCLS1/ACVR1/ERBB3/GPRC5A/CLEC7A/CLEC6A/TXK/PDGFRA/ICAM1/ITK/PTK2B/FGF7/CD3E/PTPRC/CCL5/TP53/MAP2K6/TREM2/TNF/INPP5F/BTK/NCF1/EPHB4/AFAP1L2/ADRA2A/FGFR1/SFRP1/GAS6/EFNA1/EPHB6/ITGA5/PTPN6/KIT/BANK1/BST1/CD74/PDGFRB/HBEGF/MATK/TYK2/JAK3/FYN/GREM1/EPHA2/EFEMP1/FGR/HCK/LCK/ENPP2/IL7/LRP4/CD44/IL34/AXL/SOCS3/DLG4/IGF1R/FES	61
BP	GO:0001503	ossification	64/1228	408/18723	6.09476e-11	4.93499e-09	3.43743e-09	MMP14/TGFB1/MMP9/TP63/ACVR1/CTSK/S1PR1/PTN/LEF1/BMP3/TPM4/JUNB/LOX/PTK2B/TGFB3/ATP6V1B1/SNAI2/OSR2/MMP16/ISG15/MMP2/MAP2K6/CLIC1/TNF/SRGN/CSF1/SMAD3/SNAI1/RUNX2/TWIST2/SFRP1/VEGFC/ALOX5/EGR2/IFITM5/LTBP3/GPC3/FZD1/MGP/WNT7B/IGSF10/SBNO2/FSTL3/NPR2/RUNX1/ENPP1/GREM1/EPHA2/FHL2/FGR/KLF10/LRP4/ILK/DCHS1/PTGS2/TMEM119/SMAD1/CDH11/SOX9/AXIN2/PTGER4/MSX2/PTH1R/PLXNB1	64
BP	GO:0030099	myeloid cell differentiation	61/1228	381/18723	7.34908e-11	5.86561e-09	4.08564e-09	TGFB1/MMP9/LTBR/HCLS1/BCL6/GPR171/LEF1/DNASE2/JUNB/LOX/PTK2B/CCL19/BATF/ISG15/TYROBP/ZFP36/EVI2B/MITF/TREM2/TNF/GPR137B/CSF1/NCKAP1L/ARID4A/ZFP36L1/C1QC/GATA2/INPP5D/SFRP1/FLI1/GPC3/GAB3/SCIN/PDE1B/ZNF385A/PTPN6/KIT/CD74/SBNO2/FSTL3/JAK3/CDKN2B/RUNX1/ANXA2/EPHA2/FAM210B/MAFB/KLF10/MYC/SPI1/UBASH3B/PIK3CD/BATF3/TESC/IL34/CBFA2T3/MED1/RARA/FES/KLF13/TGFBR2	61
BP	GO:0042129	regulation of T cell proliferation	37/1228	171/18723	8.4625e-11	6.60014e-09	4.59727e-09	SLAMF1/CTLA4/RAC2/CD209/EBI3/HAVCR2/CD274/ANXA1/CCL19/TNFSF8/CD3E/PTPRC/CCL5/AIF1/SPN/SASH3/CD40LG/PTPN22/NCKAP1L/PDCD1LG2/CRTAM/BTN2A2/CORO1A/CARD11/CCDC88B/PTPN6/TNFRSF13C/RASAL3/JAK3/ICOSLG/CD276/TNFSF13B/IL2RA/SDC4/TNFRSF1B/FOXJ1/TGFBR2	37
BP	GO:0002695	negative regulation of leukocyte activation	39/1228	187/18723	8.50564e-11	6.60014e-09	4.59727e-09	SAMSN1/BCL6/CTLA4/LAPTM5/FGL2/HAVCR2/CD274/ANXA1/TNFAIP3/PTPRC/TYROBP/MILR1/SPN/FGL1/BTK/TNFAIP8L2/PTPN22/NCKAP1L/PDCD1LG2/CRTAM/FOXF1/BTN2A2/INPP5D/SFRP1/TBC1D10C/PTPN6/BANK1/CD74/JAK3/RUNX1/FGR/IL2RA/SDC4/SPI1/LAX1/DTX1/AXL/FOXJ1/TBX21	39
BP	GO:0002275	myeloid cell activation involved in immune response	26/1228	91/18723	8.65193e-11	6.62169e-09	4.61228e-09	ITGB2/SLAMF1/FCER1G/S100A13/RAC2/HAVCR2/TYROBP/MILR1/CX3CR1/TREM2/ITGAM/BTK/FOXF1/PTAFR/LAT2/GATA2/LAT/KIT/SBNO2/FGR/SPI1/PIK3CD/NMI/UNC13D/DOCK2/FES	26
BP	GO:0071219	cellular response to molecule of bacterial origin	43/1228	221/18723	9.90726e-11	7.47998e-09	5.21012e-09	TGFB1/CXCL13/ICAM1/CD14/HAVCR2/CD274/ABCA1/CDK19/TNFAIP3/MRC1/ZFP36/CCL5/SCIMP/CD68/CD180/CX3CR1/CCR5/TREM2/TNF/LY86/ADAM9/SERPINE1/PTPN22/PDCD1LG2/PTAFR/SGMS1/GFI1/TSPO/SPON2/SBNO2/AKAP8/SASH1/CMPK2/DAB2IP/VIM/SIRPA/HCK/SPI1/TNFRSF1B/SIRT2/AXL/PLSCR3/RARA	43
BP	GO:0051250	negative regulation of lymphocyte activation	35/1228	157/18723	1.14142e-10	8.50284e-09	5.92259e-09	SAMSN1/BCL6/CTLA4/LAPTM5/FGL2/HAVCR2/CD274/ANXA1/TNFAIP3/TYROBP/SPN/FGL1/BTK/TNFAIP8L2/PTPN22/NCKAP1L/PDCD1LG2/CRTAM/BTN2A2/INPP5D/SFRP1/TBC1D10C/PTPN6/BANK1/CD74/JAK3/RUNX1/FGR/IL2RA/SDC4/LAX1/DTX1/AXL/FOXJ1/TBX21	35
BP	GO:0042100	B cell proliferation	27/1228	99/18723	1.22165e-10	8.98073e-09	6.25545e-09	BCL6/CTLA4/LEF1/MS4A1/PTPRC/TYROBP/CD79A/CD180/IL7R/BTK/SASH3/CD40LG/NCKAP1L/IKZF3/CD19/CDKN1A/CARD11/INPP5D/AHR/TNFRSF13C/BST1/CD74/TNFSF13B/IRS2/IL7/BAX/NFATC2	27
BP	GO:0071887	leukocyte apoptotic process	28/1228	106/18723	1.2652e-10	9.18013e-09	6.39434e-09	HCLS1/BCL6/CD274/ANXA1/CCL19/CCL21/CTSL/TRAF3IP2/CCL5/TP53/IL7R/BTK/SLC46A2/FAS/ADAM8/CXCL12/GAS6/TSC22D3/EFNA1/CD74/JAK3/PLEKHO2/IRS2/IL2RA/PIK3CD/NOC2L/AXL/BAX	28
BP	GO:0002697	regulation of immune effector process	56/1228	339/18723	1.31319e-10	9.40613e-09	6.55176e-09	ITGB2/SLAMF1/TGFB1/CD96/BCL6/LAPTM5/CD244/CD1E/FGL2/STAT6/RAC2/CLEC7A/ICAM1/HAVCR2/ANXA1/CCL19/TGFB3/DUSP10/PTPRC/TYROBP/SCIMP/IL7R/CX3CR1/TREM2/TNF/ITGAM/BTK/SH2D1A/SASH3/CD40LG/PTPN22/NCKAP1L/CRTAM/FOXF1/NFKBID/PTAFR/ZNF683/GATA2/NCF1/HK1/TRAF2/WAS/AHR/PTPN6/KIT/SPON2/CD74/JAK3/FGR/SPI1/TNFRSF1B/FOXJ1/UNC13D/TBX21/RARA/FES	56
BP	GO:0002764	immune response-regulating signaling pathway	69/1228	468/18723	1.82471e-10	1.29046e-08	8.98859e-09	CTSH/KLHL6/CTLA4/LAPTM5/FCER1G/S100A14/CTSS/MYO1G/TESPA1/CLEC7A/CLEC6A/CLEC4E/TXK/CD14/HAVCR2/ITK/TNFAIP3/RNF31/CD3E/MS4A1/PTPRC/TYROBP/CD79A/SCIMP/MAP2K6/TREM2/BTK/SH2D1A/PTPN22/NCKAP1L/NFAM1/SLC46A2/NFKBID/CD19/PRKCB/LAT2/CD247/TLR8/BTN2A2/FLOT1/COLEC12/CARD11/LIMK1/PVRIG/INPP5D/PIK3AP1/SLC15A3/GFI1/PTPN6/KIT/BANK1/UBASH3A/ICOSLG/FYN/RFTN1/CD276/DAB2IP/FGR/HCK/LCK/DGKZ/LAX1/PIK3CD/CMTM3/BAX/NMI…	69
BP	GO:0002690	positive regulation of leukocyte chemotaxis	26/1228	94/18723	1.91176e-10	1.33512e-08	9.29969e-09	SLAMF1/RARRES2/S100A14/PTN/RAC2/CXCL13/PTK2B/CCL19/CCL21/CCL5/LGMN/CX3CR1/GPSM3/AIF1/EDN1/SERPINE1/CSF1/NCKAP1L/VEGFC/CXCL12/VEGFB/GAS6/CD74/CAMK1D/SPI1/IL34	26
BP	GO:0042102	positive regulation of T cell proliferation	27/1228	101/18723	2.01082e-10	1.38697e-08	9.66081e-09	SLAMF1/CD209/EBI3/HAVCR2/CD274/ANXA1/CCL19/CD3E/PTPRC/CCL5/AIF1/SASH3/CD40LG/PTPN22/NCKAP1L/PDCD1LG2/CORO1A/CARD11/CCDC88B/TNFRSF13C/RASAL3/JAK3/ICOSLG/CD276/TNFSF13B/IL2RA/TGFBR2	27
BP	GO:0071222	cellular response to lipopolysaccharide	41/1228	209/18723	2.0724e-10	1.41201e-08	9.83526e-09	TGFB1/CXCL13/ICAM1/CD14/HAVCR2/CD274/ABCA1/CDK19/TNFAIP3/MRC1/ZFP36/CCL5/SCIMP/CD68/CD180/CX3CR1/CCR5/TNF/LY86/ADAM9/SERPINE1/PTPN22/PDCD1LG2/PTAFR/SGMS1/GFI1/TSPO/SPON2/SBNO2/AKAP8/SASH1/CMPK2/DAB2IP/VIM/SIRPA/HCK/SPI1/TNFRSF1B/AXL/PLSCR3/RARA	41
BP	GO:0006909	phagocytosis	52/1228	308/18723	2.69844e-10	1.81641e-08	1.2652e-08	ITGB2/SLAMF1/FCER1G/MYO1G/RAC2/CLEC7A/CD14/ANXA1/ABCA1/ARHGAP25/TGM2/NCF2/PTPRC/TYROBP/ITGA2/TREM2/C2/AIF1/TNF/ITGAM/MSR1/IL2RG/NCKAP1L/GATA2/COLEC12/RAB31/CORO1A/LIMK1/SYT7/SRPX/GAS6/ELMO1/LRP1/PTX3/SH3BP1/SPON2/FYN/RAB20/FGR/IL15RA/CAMK1D/SIRPA/HCK/ELMO2/CORO1C/AXL/SPHK1/UNC13D/RAB34/RARA/DOCK2/PLD4	52
BP	GO:0090130	tissue migration	58/1228	365/18723	2.91919e-10	1.94161e-08	1.35241e-08	TMSB4X/TGFB1/CTSH/MMP9/NRP2/S100A2/GADD45A/PTN/CXCL13/ANXA1/GLIPR2/PTK2B/FGF7/RHOJ/VASH1/DUSP10/SERPINF1/ITGA2/CLEC14A/LGMN/HYAL1/TNF/EDN1/ADAM9/TACSTD2/FOXF1/ANGPT2/GATA2/EMP2/EPHB4/FGFR1/VEGFC/SRPX2/EFNA1/SH3BP1/KIT/SLIT2/HBEGF/KANK2/GIPC1/KLF4/SASH1/GREM1/EPHA2/ATOH8/DAB2IP/ENPP2/PIK3CD/PTGS2/CORO1C/ZEB2/APOE/SOX9/TNFSF12/SEMA5A/NR2F2/DNAJA4/TGFBR2	58
BP	GO:2001233	regulation of apoptotic signaling pathway	57/1228	356/18723	3.09411e-10	2.03374e-08	1.41658e-08	PDIA3/CTSH/MMP9/LTBR/TP63/ACVR1/BCL2L14/ICAM1/VNN1/TNFAIP3/SLC35F6/SNAI2/PTPRC/PLAUR/BCL2L12/TP53/CX3CR1/GNAI2/TREM2/TNF/SERPINE1/SNAI1/PMAIP1/ACKR3/FAS/SGMS1/ITPRIP/FGFR1/SFRP1/CXCL12/BAD/CTSC/SRPX/TRAF2/LMNA/PEA15/ZNF385A/TIMP3/WFS1/CD74/RNF183/FYN/SOD2/NFATC4/DAB2IP/IFI6/LCK/IL7/CD44/NOC2L/PTGS2/INHBB/NOL3/BAX/MEIS3/MNT/TNFSF12	57
BP	GO:0010631	epithelial cell migration	57/1228	357/18723	3.4534e-10	2.2435e-08	1.56269e-08	TMSB4X/TGFB1/CTSH/MMP9/NRP2/S100A2/GADD45A/PTN/CXCL13/ANXA1/GLIPR2/PTK2B/FGF7/RHOJ/VASH1/DUSP10/SERPINF1/ITGA2/CLEC14A/LGMN/HYAL1/TNF/EDN1/ADAM9/TACSTD2/ANGPT2/GATA2/EMP2/EPHB4/FGFR1/VEGFC/SRPX2/EFNA1/SH3BP1/KIT/SLIT2/HBEGF/KANK2/GIPC1/KLF4/SASH1/GREM1/EPHA2/ATOH8/DAB2IP/ENPP2/PIK3CD/PTGS2/CORO1C/ZEB2/APOE/SOX9/TNFSF12/SEMA5A/NR2F2/DNAJA4/TGFBR2	57
BP	GO:0045621	positive regulation of lymphocyte differentiation	27/1228	104/18723	4.13506e-10	2.65547e-08	1.84964e-08	MMP14/BCL6/TESPA1/LEF1/ANXA1/CCL19/VNN1/DUSP10/PTPRC/IL7R/BTK/SASH3/NCKAP1L/NFKBID/CD83/INPP5D/ADAM8/BAD/GAS6/CD74/RUNX1/IL15RA/IL2RA/IL7/AXL/RARA/TGFBR2	27
BP	GO:0090132	epithelium migration	57/1228	360/18723	4.78633e-10	3.03878e-08	2.11664e-08	TMSB4X/TGFB1/CTSH/MMP9/NRP2/S100A2/GADD45A/PTN/CXCL13/ANXA1/GLIPR2/PTK2B/FGF7/RHOJ/VASH1/DUSP10/SERPINF1/ITGA2/CLEC14A/LGMN/HYAL1/TNF/EDN1/ADAM9/TACSTD2/ANGPT2/GATA2/EMP2/EPHB4/FGFR1/VEGFC/SRPX2/EFNA1/SH3BP1/KIT/SLIT2/HBEGF/KANK2/GIPC1/KLF4/SASH1/GREM1/EPHA2/ATOH8/DAB2IP/ENPP2/PIK3CD/PTGS2/CORO1C/ZEB2/APOE/SOX9/TNFSF12/SEMA5A/NR2F2/DNAJA4/TGFBR2	57
BP	GO:0033628	regulation of cell adhesion mediated by integrin	18/1228	48/18723	4.93943e-10	3.10074e-08	2.15979e-08	CXCL13/IFT74/CCL21/SNAI2/CD3E/CCL5/ADAM9/PLAU/SERPINE1/NCKAP1L/FERMT3/EFNA1/PODXL/PTPN6/ACER2/EPHA2/TESC/SKAP1	18
BP	GO:0061448	connective tissue development	45/1228	252/18723	6.85398e-10	4.2548e-08	2.96365e-08	CHI3L1/TGFB1/TIMP1/CTSK/BMP3/LOX/SNAI2/SULF1/OSR2/HYAL1/EDN1/ARID5B/CSF1/SMAD3/SNAI1/OXCT1/RUNX2/LTBP3/CRIP1/SCIN/MGP/WNT7B/EVC/PDGFRB/EGR1/RUNX1/COL27A1/GREM1/EFEMP1/SULF2/SPI1/CD44/TSKU/SORL1/PRRX1/SMAD1/MAF/SOX9/AXIN2/RARA/SH3PXD2B/ADAMTS7/FOXA1/PTH1R/TGFBR2	45
BP	GO:0001655	urogenital system development	54/1228	338/18723	9.85608e-10	6.01678e-08	4.19094e-08	CTSH/MMP9/AKR1B1/TP63/KCNJ8/PDGFRA/KLHL3/ANXA1/TRAF3IP2/SULF1/OSR2/SERPINF1/ARID5B/TACSTD2/SMAD3/MPV17/FOXF1/ANGPT2/GATA2/TFAP2B/GLIS2/SFRP1/BICC1/SGPL1/GPC3/CRIP1/PODXL/WNT7B/SLIT2/WFS1/PROM1/PDGFRB/EGR1/FSTL3/KANK2/HPGD/AHI1/GREM1/SNX17/LAMA5/SDC4/SULF2/MYC/LRP4/ILK/DCHS1/SPRY1/SMAD1/BAX/FOXJ1/SOX9/RARA/BASP1/FOXA1	54
BP	GO:0002285	lymphocyte activation involved in immune response	38/1228	194/18723	9.90771e-10	6.01678e-08	4.19094e-08	TGFB1/BCL6/DOCK10/FCER1G/CD244/FGL2/STAT6/MFNG/CRACR2A/LEF1/ICAM1/HAVCR2/ANXA1/PTK2B/CCL19/BATF/PTPRC/TP53/CD180/SPN/CD40LG/NCKAP1L/NFKBID/ZNF683/CD19/CORO1A/LFNG/DOCK11/LGALS1/CD74/JAK3/SPI1/POU2AF1/BCL3/UNC13D/TBX21/RARA/PTGER4	38
BP	GO:0045580	regulation of T cell differentiation	32/1228	146/18723	1.1206e-09	6.73204e-08	4.68915e-08	BCL6/CTLA4/FGL2/TESPA1/LEF1/ANXA1/CCL19/VNN1/DUSP10/PTPRC/IL7R/SASH3/NCKAP1L/SLC46A2/CRTAM/NFKBID/ZNF683/CD83/CARD11/ADAM8/BAD/CD74/TCF7/JAK3/RUNX1/IL2RA/IL7/DTX1/FOXJ1/TBX21/RARA/TGFBR2	32
BP	GO:2000106	regulation of leukocyte apoptotic process	23/1228	81/18723	1.20297e-09	7.15e-08	4.98027e-08	HCLS1/BCL6/CD274/ANXA1/CCL19/CCL21/CCL5/TP53/IL7R/BTK/SLC46A2/ADAM8/CXCL12/GAS6/TSC22D3/EFNA1/CD74/JAK3/IRS2/PIK3CD/NOC2L/AXL/BAX	23
BP	GO:0022408	negative regulation of cell-cell adhesion	38/1228	196/18723	1.34313e-09	7.89903e-08	5.50201e-08	TGFB1/BCL6/CTLA4/LAPTM5/FGL2/HAVCR2/CD274/ANXA1/CCL21/IL1RN/SPN/FGL1/TNFAIP8L2/PTPN22/NCKAP1L/PDCD1LG2/CRTAM/BTN2A2/ZNF703/CXCL12/PODXL/PTPN6/CD74/JAK3/KLF4/RUNX1/AKNA/IL2RA/SDC4/SERPINE2/SPI1/UBASH3B/LAX1/DTX1/ADAMTS18/FXYD5/FOXJ1/TBX21	38
BP	GO:0007599	hemostasis	41/1228	222/18723	1.39231e-09	8.10293e-08	5.64403e-08	PROS1/FN1/FCER1G/TXK/PDGFRA/F2RL2/PLEK/PDPN/PLA2G4A/PLAUR/SERPINF2/ITGA2/CLIC1/EDN1/PLAT/PLAU/CD40LG/SERPINE1/SELP/ENTPD1/F13A1/ADRA2A/FERMT3/ST3GAL4/FLI1/WAS/GAS6/F3/TFPI2/PTPN6/FBLN1/ANXA2/ENTPD2/LCK/SERPINE2/DGKZ/ILK/UBASH3B/ADAMTS18/AXL/APOE	41
BP	GO:0046631	alpha-beta T cell activation	33/1228	156/18723	1.6231e-09	9.3487e-08	6.51176e-08	BCL6/STAT6/CRACR2A/LEF1/EBI3/ITK/CD274/ANXA1/CCL19/CTSL/TNFSF8/BATF/CD3E/PTPRC/SPN/WDFY4/SASH3/PTPN22/NCKAP1L/CRTAM/NFKBID/ZNF683/CD83/ELF4/RASAL3/JAK3/RUNX1/BCL3/TBX21/RARA/PTGER4/DOCK2/TGFBR2	33
BP	GO:0007015	actin filament organization	64/1228	442/18723	1.76756e-09	1.00769e-07	7.01899e-08	TMSB4X/HCLS1/S1PR1/MYO1G/RAC2/TPM4/ICAM1/FCHSD1/PTK2B/CCL21/TGFB3/PLEK/ARHGAP25/COTL1/SERPINF2/PSTPIP1/AIF1/PSTPIP2/KCTD13/TACSTD2/NCKAP1L/SMAD3/ADD3/CORO1A/HIP1/EMP2/FSCN1/LIMK1/SFRP1/CXCL12/RHOD/CDC42EP2/SH3KBP1/WAS/S100A10/ZYX/CALD1/ELMO1/SCIN/EPS8/SH3BP1/PDXP/SLIT2/DPYSL3/DBN1/MYO1F/MICAL1/CAPZB/CDC42EP3/TMSB10/WASF3/FAM171A1/HCK/SDC4/ELMO2/PREX1/USH1C/CORO1C/FHOD1/GAS7/WIPF1/PPP1R9B/PTGER4/S…	64
BP	GO:0022612	gland morphogenesis	28/1228	118/18723	1.83419e-09	1.03511e-07	7.21001e-08	TGFB1/TP63/SOSTDC1/PTN/STAT6/TNFAIP3/FGF7/TGFB3/TGM2/SULF1/TNF/FGL1/CSF1/SFRP1/CAPN1/CRIP1/EPHA2/EDAR/RPS6KA1/LAMA5/SULF2/ELF3/BAX/SOX9/TBX2/MED1/FOXA1/TGFBR2	28
BP	GO:0046849	bone remodeling	24/1228	90/18723	2.14026e-09	1.19577e-07	8.32901e-08	TGFB1/CTSK/S1PR1/PDK4/PTN/RAC2/PTK2B/TNFAIP3/TGFB3/TPP1/MITF/GPR137B/INPP5D/ADAM8/SFRP1/LTBP3/SYT7/GREM1/EPHA2/IL7/UBASH3B/TMEM119/P3H4/PTH1R	24
BP	GO:0007596	blood coagulation	40/1228	217/18723	2.33731e-09	1.29292e-07	9.00575e-08	PROS1/FN1/FCER1G/TXK/PDGFRA/F2RL2/PLEK/PDPN/PLA2G4A/PLAUR/SERPINF2/ITGA2/CLIC1/EDN1/PLAT/PLAU/CD40LG/SERPINE1/SELP/ENTPD1/F13A1/ADRA2A/FERMT3/ST3GAL4/WAS/GAS6/F3/TFPI2/PTPN6/FBLN1/ANXA2/ENTPD2/LCK/SERPINE2/DGKZ/ILK/UBASH3B/ADAMTS18/AXL/APOE	40
BP	GO:0048771	tissue remodeling	35/1228	175/18723	2.53869e-09	1.39055e-07	9.68579e-08	MMP14/TGFB1/TIMP1/CTSK/S1PR1/PDK4/PTN/RAC2/PTK2B/TNFAIP3/TGFB3/TGM2/TPP1/MMP2/TP53/MITF/GPR137B/INPP5D/ADAM8/SFRP1/CAPN1/LTBP3/SYT7/RUNX1/GREM1/EPHA2/IL7/UBASH3B/ELF3/TMEM119/NOL3/AXL/BAX/P3H4/PTH1R	35
BP	GO:0002429	immune response-activating cell surface receptor signaling pathway	48/1228	291/18723	2.89449e-09	1.55495e-07	1.08309e-07	KLHL6/CTLA4/LAPTM5/FCER1G/MYO1G/TESPA1/CLEC7A/CLEC6A/TXK/ITK/RNF31/CD3E/MS4A1/PTPRC/TYROBP/CD79A/BTK/SH2D1A/PTPN22/NCKAP1L/NFAM1/NFKBID/CD19/PRKCB/LAT2/CD247/BTN2A2/CARD11/LIMK1/PVRIG/INPP5D/PTPN6/BANK1/UBASH3A/ICOSLG/FYN/RFTN1/CD276/FGR/HCK/LCK/DGKZ/LAX1/PIK3CD/CMTM3/BAX/SKAP1/NFATC2	48
BP	GO:0002757	immune response-activating signal transduction	48/1228	291/18723	2.89449e-09	1.55495e-07	1.08309e-07	KLHL6/CTLA4/LAPTM5/FCER1G/MYO1G/TESPA1/CLEC7A/CLEC6A/TXK/ITK/RNF31/CD3E/MS4A1/PTPRC/TYROBP/CD79A/BTK/SH2D1A/PTPN22/NCKAP1L/NFAM1/NFKBID/CD19/PRKCB/LAT2/CD247/BTN2A2/CARD11/LIMK1/PVRIG/INPP5D/PTPN6/BANK1/UBASH3A/ICOSLG/FYN/RFTN1/CD276/FGR/HCK/LCK/DGKZ/LAX1/PIK3CD/CMTM3/BAX/SKAP1/NFATC2	48
BP	GO:0010632	regulation of epithelial cell migration	48/1228	292/18723	3.24887e-09	1.72871e-07	1.20412e-07	TMSB4X/TGFB1/CTSH/MMP9/NRP2/GADD45A/PTN/CXCL13/ANXA1/GLIPR2/PTK2B/FGF7/RHOJ/VASH1/DUSP10/SERPINF1/ITGA2/LGMN/HYAL1/TNF/EDN1/ADAM9/TACSTD2/ANGPT2/GATA2/EMP2/FGFR1/VEGFC/SRPX2/EFNA1/SH3BP1/SLIT2/HBEGF/KLF4/SASH1/EPHA2/ATOH8/DAB2IP/ENPP2/PIK3CD/PTGS2/CORO1C/APOE/SOX9/SEMA5A/NR2F2/DNAJA4/TGFBR2	48
BP	GO:0070371	ERK1 and ERK2 cascade	52/1228	330/18723	3.28628e-09	1.73212e-07	1.20649e-07	CHI3L1/SLAMF1/TGFB1/CTSH/FN1/PDGFRA/ICAM1/HAVCR2/GLIPR2/PTK2B/CCL19/CCL21/DUSP10/PTPRC/CCL22/CCL5/SERPINF2/SCIMP/GNAI2/TREM2/TNF/PTPN22/RAMP3/ZFP36L1/ZFP36L2/ACKR3/TBC1D10C/GAS6/DUSP6/LRP1/TIMP3/PTPN6/FBLN1/CD74/PDGFRB/SEMA6A/WNK2/KLF4/AKAP12/CNKSR3/TNFAIP8L3/EPHA2/DAB2IP/SIRPA/MYC/CD44/GPBAR1/SPRY1/APOE/SOX9/PTGER4/PDE8A	52
BP	GO:0043410	positive regulation of MAPK cascade	67/1228	480/18723	3.41153e-09	1.78133e-07	1.24077e-07	IGFBP4/CHI3L1/SLAMF1/TGFB1/LTBR/LAPTM5/GADD45A/CLEC7A/CRACR2A/PDGFRA/GDF15/ICAM1/HAVCR2/GLIPR2/PTK2B/CCL19/CCL21/PTPRC/CCL22/CCL5/SERPINF2/SCIMP/MAP2K6/GNAI2/TREM2/TNF/EDN1/ADAM9/PTPN22/RAMP3/NCF1/ACKR3/ADAM8/ADRA2A/FGFR1/FZD4/TRAF2/GAS6/BCAR3/EFNA1/DVL3/LRP1/WNT7B/KIT/BANK1/CD74/PDGFRB/SHC2/SASH1/AKAP12/TNFAIP8L3/EDAR/DAB2IP/TNFRSF19/DOK5/SPI1/CD44/ILK/GPBAR1/FZD7/IL34/APOE/TIMP2/SPHK1/PIK3R5/IG…	67
BP	GO:0072001	renal system development	49/1228	302/18723	3.48326e-09	1.80194e-07	1.25513e-07	CTSH/MMP9/AKR1B1/KCNJ8/PDGFRA/KLHL3/TRAF3IP2/SULF1/OSR2/SERPINF1/ARID5B/TACSTD2/SMAD3/MPV17/FOXF1/ANGPT2/TFAP2B/GLIS2/SFRP1/BICC1/SGPL1/GPC3/PODXL/WNT7B/SLIT2/WFS1/PROM1/PDGFRB/EGR1/FSTL3/KANK2/HPGD/AHI1/GREM1/SNX17/LAMA5/SDC4/SULF2/MYC/LRP4/ILK/DCHS1/SPRY1/SMAD1/BAX/FOXJ1/SOX9/RARA/BASP1	49
BP	GO:0001822	kidney development	48/1228	293/18723	3.64419e-09	1.8679e-07	1.30107e-07	CTSH/MMP9/AKR1B1/KCNJ8/PDGFRA/KLHL3/TRAF3IP2/SULF1/OSR2/SERPINF1/ARID5B/TACSTD2/SMAD3/MPV17/ANGPT2/TFAP2B/GLIS2/SFRP1/BICC1/SGPL1/GPC3/PODXL/WNT7B/SLIT2/WFS1/PROM1/PDGFRB/EGR1/FSTL3/KANK2/HPGD/AHI1/GREM1/SNX17/LAMA5/SDC4/SULF2/MYC/LRP4/ILK/DCHS1/SPRY1/SMAD1/BAX/FOXJ1/SOX9/RARA/BASP1	48
BP	GO:0007229	integrin-mediated signaling pathway	26/1228	107/18723	4.03411e-09	2.04896e-07	1.42719e-07	ITGB2/TIMP1/FN1/PTN/TXK/PTK2B/PLEK/ISG15/ITGA2/ITGAM/ADAM9/CD40LG/ITGA4/ITGAX/EMP2/LAT/FERMT3/ZYX/ITGA5/ITGB7/BST1/FGR/LAMA5/HCK/ILK/ITGB4	26
BP	GO:0008360	regulation of cell shape	32/1228	154/18723	4.55401e-09	2.29218e-07	1.5966e-07	ITGB2/S100B/ARHGAP15/FN1/PTN/RAC2/ICAM1/ANXA1/PTK2B/RHOJ/PDPN/PLXNC1/CORO1A/RHOD/CDC42EP2/SH3KBP1/PLEKHO1/EPS8/PARVB/KIT/PALM/FYN/CDC42EP3/RHOQ/WASF3/FGR/FAM171A1/HCK/HEXB/ATP10A/FES/PLXNB1	32
BP	GO:0050817	coagulation	40/1228	222/18723	4.62891e-09	2.30908e-07	1.60837e-07	PROS1/FN1/FCER1G/TXK/PDGFRA/F2RL2/PLEK/PDPN/PLA2G4A/PLAUR/SERPINF2/ITGA2/CLIC1/EDN1/PLAT/PLAU/CD40LG/SERPINE1/SELP/ENTPD1/F13A1/ADRA2A/FERMT3/ST3GAL4/WAS/GAS6/F3/TFPI2/PTPN6/FBLN1/ANXA2/ENTPD2/LCK/SERPINE2/DGKZ/ILK/UBASH3B/ADAMTS18/AXL/APOE	40
BP	GO:0007178	transmembrane receptor protein serine/threonine kinase signaling pathway	54/1228	355/18723	5.88272e-09	2.90856e-07	2.02593e-07	TGFB1/NCEH1/ACVR1/SOSTDC1/LEF1/RASL11B/BMP3/GDF15/LOX/TGFB3/SULF1/TMEM100/TP53/DAB2/SFRP5/ADAM9/SMAD3/RUNX2/TFAP2B/VASN/HTRA1/RBPMS/SFRP1/ZNF703/LTBP3/AKAP4/GPC3/CLDN5/ZYX/LRP1/BTBD11/HTRA3/EGR1/FSTL3/GIPC1/HPGD/CDKN2B/LTBP2/GREM1/ATOH8/SMAD9/VIM/PMEPA1/SPI1/ILK/DKK3/SORL1/SPRY1/SMAD1/INHBB/ZNF423/ZEB2/FURIN/TGFBR2	54
BP	GO:0007160	cell-matrix adhesion	41/1228	233/18723	6.09671e-09	2.98792e-07	2.08121e-07	ITGB2/MMP14/CD96/APOD/BCL6/FN1/PTK2B/CCL21/SIGLEC1/CD3E/LYVE1/ITGA2/ADAM9/PLAU/SERPINE1/CSF1/SMAD3/ITGA4/SNED1/EMP2/SFRP1/FERMT3/EFEMP2/RHOD/S100A10/ZYX/EPDR1/ITGB7/LRP1/PARVG/BST1/ACER2/NID2/GREM1/SDC4/CD44/ILK/CORO1C/ITGB4/SKAP1/FBLN5	41
BP	GO:0050864	regulation of B cell activation	37/1228	198/18723	6.30459e-09	3.06293e-07	2.13346e-07	MMP14/TGFB1/SAMSN1/BCL6/CTLA4/LAPTM5/STAT6/TNFAIP3/PTPRC/TYROBP/BTK/SASH3/NCKAP1L/NFAM1/ZFP36L1/ZFP36L2/IKZF3/CD19/CDKN1A/CARD11/INPP5D/SFRP1/BAD/TBC1D10C/SH3KBP1/AHR/PTPN6/TNFRSF13C/BANK1/BST1/CD74/TNFSF13B/IRS2/IL7/FOXJ1/TBX21/NFATC2	37
BP	GO:0048017	inositol lipid-mediated signaling	35/1228	182/18723	7.44425e-09	3.58543e-07	2.4974e-07	HCLS1/FN1/ERBB3/PDGFRA/CCL5/TREM2/TNF/EDN1/INPP5F/ZFP36L1/SELP/PTAFR/NCF1/NLRC3/PIK3AP1/FGFR1/PTPN6/KIT/PDGFRB/KLF4/FYN/TNFAIP8L3/PLCB2/DAB2IP/FGR/SERPINE2/PIK3CD/PIK3IP1/SIRT2/SOX9/PIK3R5/PLCD3/IGF1R/PLCD1/PLXNB1	35
BP	GO:0034612	response to tumor necrosis factor	43/1228	253/18723	7.70318e-09	3.67843e-07	2.56218e-07	CHI3L1/TMSB4X/CLDN1/LAPTM5/KRT8/KRT18/ICAM1/CD14/PTK2B/CCL19/CCL21/TRAF3IP2/TNFAIP3/CCL22/ZFP36/CCL5/TP53/HYAL1/TNF/EDN1/ADAM9/ZFP36L1/ZFP36L2/GGT7/FAS/SGMS1/ASAH1/SFRP1/TRAF2/GAS6/TNFRSF13C/AKAP12/DAB2IP/TNFSF13B/TNFRSF19/ILK/TNFRSF1B/PTGS2/TRADD/NOL3/SPHK1/CXCL16/ADAMTS7	43
BP	GO:0002703	regulation of leukocyte mediated immunity	40/1228	226/18723	7.8555e-09	3.71938e-07	2.5907e-07	ITGB2/SLAMF1/TGFB1/CD96/BCL6/CD1E/STAT6/RAC2/CLEC7A/ICAM1/HAVCR2/PTPRC/TYROBP/SCIMP/IL7R/CX3CR1/TREM2/TNF/ITGAM/BTK/SH2D1A/SASH3/NCKAP1L/CRTAM/FOXF1/PTAFR/GATA2/TRAF2/WAS/AHR/PTPN6/KIT/JAK3/FGR/SPI1/TNFRSF1B/FOXJ1/UNC13D/TBX21/FES	40
BP	GO:0002819	regulation of adaptive immune response	35/1228	183/18723	8.63484e-09	4.05402e-07	2.82379e-07	SLAMF1/TGFB1/SAMSN1/BCL6/CD1E/STAT6/CLEC7A/CLEC6A/HAVCR2/CD274/ANXA1/CCL19/TNFAIP3/IL1RL1/DUSP10/PLA2G4A/PTPRC/IL7R/TREM2/TNF/BTK/SASH3/NCKAP1L/NFKBID/TRAF2/WAS/CD48/AHR/PTPN6/JAK3/TNFSF13B/TNFRSF1B/FOXJ1/SKAP1/TBX21	35
BP	GO:0052547	regulation of peptidase activity	64/1228	461/18723	9.51872e-09	4.43176e-07	3.08691e-07	CTSH/MMP9/TIMP1/PROS1/TP63/FN1/LAPTM5/CLEC7A/TNFAIP8/SPINK9/PLAUR/BCL2L12/SERPINF2/SERPINF1/NAIP/LGMN/SERPINA5/TNF/SERPINE1/LAMP3/SMAD3/ANTXR1/SERPINB12/PMAIP1/PCOLCE/HIP1/COL6A3/TFAP4/PRSS22/FAS/BAD/CTSD/GPC3/GAS6/RENBP/F3/EFNA1/TFPI2/LRP1/TIMP3/RARRES1/FBLN1/PCOLCE2/SPOCK1/ACER2/ANP32B/KLF4/FYN/MICAL1/PAPLN/ANXA2/RPS6KA1/IFI6/LCK/MYC/SERPINE2/CD44/SORL1/PTGS2/NOL3/BAX/RCN3/TIMP2/FURIN	64
BP	GO:0097191	extrinsic apoptotic signaling pathway	39/1228	219/18723	1.01033e-08	4.66503e-07	3.24939e-07	PDIA3/TGFB1/LTBR/ACVR1/KRT8/KRT18/ERBB3/BCL2L14/ICAM1/TNFAIP3/SNAI2/PTPRC/BCL2L12/BCL2A1/TNF/SERPINE1/SMAD3/PMAIP1/FAS/BAG3/ITPRIP/FGFR1/SFRP1/BAD/SRPX/TRAF2/LMNA/PEA15/TIMP3/FYN/DAB2IP/IFI6/IL7/SPI1/TNFRSF1B/TRADD/NOL3/BAX/TNFSF12	39
BP	GO:0002768	immune response-regulating cell surface receptor signaling pathway	49/1228	315/18723	1.42931e-08	6.54555e-07	4.55925e-07	KLHL6/CTLA4/LAPTM5/FCER1G/MYO1G/TESPA1/CLEC7A/CLEC6A/TXK/ITK/RNF31/CD3E/MS4A1/PTPRC/TYROBP/CD79A/BTK/SH2D1A/PTPN22/NCKAP1L/NFAM1/NFKBID/CD19/PRKCB/LAT2/CD247/BTN2A2/CARD11/LIMK1/PVRIG/INPP5D/PTPN6/KIT/BANK1/UBASH3A/ICOSLG/FYN/RFTN1/CD276/FGR/HCK/LCK/DGKZ/LAX1/PIK3CD/CMTM3/BAX/SKAP1/NFATC2	49
BP	GO:0048015	phosphatidylinositol-mediated signaling	34/1228	178/18723	1.45283e-08	6.59916e-07	4.59659e-07	HCLS1/FN1/ERBB3/PDGFRA/CCL5/TREM2/TNF/EDN1/INPP5F/ZFP36L1/SELP/PTAFR/NCF1/NLRC3/PIK3AP1/FGFR1/PTPN6/KIT/PDGFRB/KLF4/FYN/PLCB2/DAB2IP/FGR/SERPINE2/PIK3CD/PIK3IP1/SIRT2/SOX9/PIK3R5/PLCD3/IGF1R/PLCD1/PLXNB1	34
BP	GO:0030888	regulation of B cell proliferation	19/1228	64/18723	1.47376e-08	6.64023e-07	4.6252e-07	BCL6/CTLA4/PTPRC/TYROBP/BTK/SASH3/NCKAP1L/IKZF3/CDKN1A/CARD11/INPP5D/AHR/TNFRSF13C/BST1/CD74/TNFSF13B/IRS2/IL7/NFATC2	19
BP	GO:2000107	negative regulation of leukocyte apoptotic process	16/1228	46/18723	1.61523e-08	7.21942e-07	5.02863e-07	HCLS1/BCL6/CCL19/CCL21/CCL5/IL7R/SLC46A2/CXCL12/GAS6/TSC22D3/EFNA1/CD74/JAK3/IRS2/NOC2L/AXL	16
BP	GO:0045577	regulation of B cell differentiation	13/1228	30/18723	1.63329e-08	7.24223e-07	5.04451e-07	MMP14/BTK/NCKAP1L/NFAM1/ZFP36L1/ZFP36L2/IKZF3/CARD11/INPP5D/SFRP1/BAD/PTPN6/IL7	13
BP	GO:0050727	regulation of inflammatory response	56/1228	386/18723	1.72069e-08	7.56967e-07	5.27259e-07	TMSB4X/MMP9/BCL6/TNFAIP6/ANXA1/CDK19/TNFAIP3/IL1RL1/ALOX5AP/TGM2/DUSP10/PTPRC/ZFP36/CCL5/SERPINF1/ITGA2/TREM2/GPSM3/TNF/BTK/SERPINE1/TNFAIP8L2/SMAD3/FOXF1/NCF1/NLRC3/PIK3AP1/ADAM8/ALOX5/CTSC/PTGER3/ZYX/BST1/SBNO2/KLF4/AKNA/FYN/C2CD4B/PTGES/FGR/IL2RA/SIRPA/HCK/PTGIS/TNFRSF1B/PTGS2/TRADD/APOE/NMI/SIGLEC10/SOCS3/SPHK1/METRNL/PTGER4/OSMR/FURIN	56
BP	GO:0043299	leukocyte degranulation	20/1228	73/18723	2.81676e-08	1.22947e-06	8.5638e-07	ITGB2/S100A13/RAC2/MILR1/ITGAM/BTK/NCKAP1L/FOXF1/PTAFR/LAT2/GATA2/CORO1A/LAT/KIT/FGR/HCK/SPI1/PIK3CD/UNC13D/FES	20
BP	GO:0072676	lymphocyte migration	26/1228	117/18723	2.96506e-08	1.28417e-06	8.94479e-07	CXCR3/APOD/S1PR1/MYO1G/CXCL13/ICAM1/PTK2B/CCL19/CCL21/CCL22/CCL5/AIF1/SPN/CH25H/ITGA4/CRTAM/ADAM8/CXCL12/XG/CD99/GAS6/ITGB7/PADI2/PIK3CD/CXCL16/TBX21	26
BP	GO:0030574	collagen catabolic process	15/1228	42/18723	3.00953e-08	1.2934e-06	9.00909e-07	MMP14/MMP9/CTSK/CTSS/CTSL/MMP16/MMP7/MMP2/MMP25/MMP19/CTSB/MMP11/KLK6/MMP28/FURIN	15
BP	GO:0045637	regulation of myeloid cell differentiation	37/1228	210/18723	3.21301e-08	1.36937e-06	9.53826e-07	TGFB1/HCLS1/GPR171/LEF1/LOX/PTK2B/ISG15/TYROBP/ZFP36/EVI2B/MITF/TREM2/TNF/GPR137B/CSF1/NCKAP1L/ZFP36L1/C1QC/GATA2/INPP5D/SFRP1/SCIN/CD74/FSTL3/RUNX1/FAM210B/MAFB/KLF10/MYC/SPI1/UBASH3B/TESC/IL34/MED1/RARA/FES/KLF13	37
BP	GO:0002467	germinal center formation	9/1228	14/18723	3.23532e-08	1.36937e-06	9.53826e-07	BCL6/KLHL6/CXCL13/TNFAIP3/NFKB2/TNFSF13B/BCL3/FOXJ1/UNC13D	9
BP	GO:0050764	regulation of phagocytosis	23/1228	95/18723	3.38802e-08	1.42322e-06	9.91333e-07	FCER1G/CLEC7A/TGM2/PTPRC/ITGA2/TREM2/C2/TNF/IL2RG/NCKAP1L/GATA2/RAB31/SYT7/GAS6/LRP1/PTX3/FGR/IL15RA/CAMK1D/SIRPA/HCK/SPHK1/DOCK2	23
BP	GO:0010810	regulation of cell-substrate adhesion	38/1228	221/18723	4.12571e-08	1.72018e-06	1.19817e-06	MMP14/APOD/BCL6/FN1/PTN/RAC2/EDIL3/PTK2B/CCL21/CD3E/PDPN/PLAU/ARL2/SERPINE1/TACSTD2/CSF1/SMAD3/FOXF1/ANGPT2/EMP2/SFRP1/EFEMP2/FZD4/S100A10/LRP1/LGALS1/FBLN1/BST1/SPOCK1/ACER2/GREM1/SDC4/PREX1/ILK/FZD7/CORO1C/UNC13D/SKAP1	38
BP	GO:0030282	bone mineralization	26/1228	119/18723	4.28559e-08	1.7736e-06	1.23539e-06	TGFB1/ACVR1/S1PR1/PTN/LOX/PTK2B/TGFB3/OSR2/ISG15/SRGN/SMAD3/ALOX5/IFITM5/LTBP3/GPC3/MGP/SBNO2/ENPP1/GREM1/FGR/KLF10/PTGS2/TMEM119/SOX9/AXIN2/PTH1R	26
BP	GO:0050851	antigen receptor-mediated signaling pathway	40/1228	240/18723	4.45636e-08	1.83071e-06	1.27517e-06	KLHL6/CTLA4/LAPTM5/TESPA1/TXK/ITK/RNF31/CD3E/MS4A1/PTPRC/CD79A/BTK/SH2D1A/PTPN22/NCKAP1L/NFAM1/NFKBID/CD19/PRKCB/LAT2/CD247/BTN2A2/CARD11/PVRIG/INPP5D/PTPN6/BANK1/UBASH3A/ICOSLG/FYN/RFTN1/CD276/LCK/DGKZ/LAX1/PIK3CD/CMTM3/BAX/SKAP1/NFATC2	40
BP	GO:0001818	negative regulation of cytokine production	52/1228	357/18723	4.87522e-08	1.97921e-06	1.37861e-06	SLAMF1/TMSB4X/TGFB1/CD96/APOD/BCL6/FN1/LAPTM5/LEF1/HAVCR2/CD274/ANXA1/TNFAIP3/TGFB3/IL1RL1/PTPRC/TYROBP/ZFP36/CX3CR1/TREM2/TNF/SRGN/BTK/PTPN22/NCKAP1L/PDCD1LG2/TLR8/BTN2A2/CD83/NLRC3/INPP5D/GAS6/PTPN6/TSPO/BANK1/AKAP8/JAK3/HOMER3/KLF4/EPHA2/SIRPA/TSKU/INHBB/CDH3/AXL/BCL3/NMI/FOXJ1/TBX21/RARA/PTGER4/FURIN	52
BP	GO:0014065	phosphatidylinositol 3-kinase signaling	29/1228	144/18723	4.94612e-08	1.97921e-06	1.37861e-06	HCLS1/FN1/ERBB3/PDGFRA/CCL5/TREM2/TNF/EDN1/ZFP36L1/SELP/NCF1/NLRC3/PIK3AP1/FGFR1/PTPN6/KIT/PDGFRB/KLF4/FYN/DAB2IP/FGR/SERPINE2/PIK3CD/PIK3IP1/SIRT2/SOX9/PIK3R5/IGF1R/PLXNB1	29
BP	GO:0032609	interferon-gamma production	25/1228	112/18723	4.95955e-08	1.97921e-06	1.37861e-06	SLAMF1/CD96/LAPTM5/CD244/CLEC7A/TXK/EBI3/CD14/HAVCR2/CD274/IL1RL1/CD3E/ISG15/TNF/SASH3/PTPN22/PDCD1LG2/CRTAM/TLR8/GAS6/CD276/SIRPA/AXL/BCL3/RARA	25
BP	GO:0032649	regulation of interferon-gamma production	25/1228	112/18723	4.95955e-08	1.97921e-06	1.37861e-06	SLAMF1/CD96/LAPTM5/CD244/CLEC7A/TXK/EBI3/CD14/HAVCR2/CD274/IL1RL1/CD3E/ISG15/TNF/SASH3/PTPN22/PDCD1LG2/CRTAM/TLR8/GAS6/CD276/SIRPA/AXL/BCL3/RARA	25
BP	GO:0002761	regulation of myeloid leukocyte differentiation	26/1228	120/18723	5.13426e-08	2.0344e-06	1.41705e-06	TGFB1/HCLS1/LEF1/TYROBP/EVI2B/MITF/TREM2/TNF/GPR137B/CSF1/ZFP36L1/C1QC/GATA2/INPP5D/SFRP1/CD74/FSTL3/RUNX1/MAFB/KLF10/MYC/UBASH3B/TESC/IL34/RARA/FES	26
BP	GO:0032956	regulation of actin cytoskeleton organization	52/1228	358/18723	5.34958e-08	2.09509e-06	1.45932e-06	TMSB4X/HCLS1/S1PR1/RAC2/PDGFRA/ICAM1/FCHSD1/PTK2B/CCL21/TGFB3/PLEK/COTL1/SERPINF2/EDN1/TACSTD2/NCKAP1L/SMAD3/ADD3/CORO1A/FSCN1/LIMK1/SFRP1/CXCL12/RHOD/CDC42EP2/WAS/S100A10/SCIN/LRP1/EPS8/ARHGDIB/SH3BP1/PDXP/SLIT2/BST1/PDGFRB/DBN1/TRPM2/CAPZB/CDC42EP3/RHOQ/TMSB10/WASF3/HCK/SDC4/PREX1/ILK/FHOD1/ABI3/PTGER4/SEMA5A/FES	52
BP	GO:0060348	bone development	36/1228	205/18723	5.36242e-08	2.09509e-06	1.45932e-06	MMP14/LOX/TGFB3/TGM2/SULF1/OSR2/MMP16/PTPRC/TYROBP/TP53/MAP2K6/RUNX2/IFITM5/LTBP3/FLI1/ZNF385A/PTPN6/KIT/NPR2/COL27A1/ANXA2/GREM1/SULF2/TSKU/DCHS1/TMEM119/SMAD1/SOX9/AXIN2/MED1/RARA/PTGER4/SH3PXD2B/MSX2/TGFBR2/PLXNB1	36
BP	GO:0060485	mesenchyme development	45/1228	291/18723	6.61331e-08	2.56587e-06	1.78724e-06	TGFB1/ACVR1/NRP2/FN1/S100A4/LEF1/GLIPR2/TGFB3/SNAI2/PDPN/EDNRA/TMEM100/MEOX1/DAB2/EDN1/SMAD3/ZFP36L1/SNAI1/FOXF1/VASN/FGFR1/SFRP1/ZNF703/EFNA1/TCOF1/PDGFRB/SEMA6A/AKNA/GREM1/DAB2IP/LAMA5/MYC/DCHS1/CORO1C/SPRY1/TEAD2/SOX9/AXIN2/TBX2/SEMA5A/BASP1/MESP1/GSC/FOXA1/TGFBR2	45
BP	GO:0045123	cellular extravasation	19/1228	70/18723	7.35475e-08	2.83386e-06	1.9739e-06	ICAM1/CCL21/CX3CR1/TNF/SPN/ITGA4/SELP/PTAFR/ADAM8/CXCL12/ST3GAL4/XG/CD99/ITGB7/BST1/SIRPA/SELL/PIK3CD/PTGER4	19
BP	GO:0051216	cartilage development	34/1228	190/18723	7.78762e-08	2.9801e-06	2.07576e-06	CHI3L1/TGFB1/TIMP1/CTSK/BMP3/SNAI2/SULF1/OSR2/HYAL1/EDN1/SMAD3/SNAI1/RUNX2/LTBP3/SCIN/MGP/WNT7B/EVC/RUNX1/COL27A1/GREM1/EFEMP1/SULF2/CD44/TSKU/PRRX1/SMAD1/MAF/SOX9/AXIN2/RARA/ADAMTS7/PTH1R/TGFBR2	34
BP	GO:0050852	T cell receptor signaling pathway	26/1228	123/18723	8.70998e-08	3.31039e-06	2.30582e-06	CTLA4/LAPTM5/TESPA1/TXK/ITK/RNF31/CD3E/PTPRC/SH2D1A/PTPN22/NFKBID/CD247/BTN2A2/CARD11/PVRIG/INPP5D/PTPN6/UBASH3A/ICOSLG/FYN/RFTN1/CD276/LCK/DGKZ/PIK3CD/SKAP1	26
BP	GO:0051043	regulation of membrane protein ectodomain proteolysis	11/1228	24/18723	1.04213e-07	3.93403e-06	2.74021e-06	TIMP1/TNF/ADAM9/ADAM8/ADRA2A/TIMP3/PTPN3/TNFRSF1B/APOE/TIMP2/FURIN	11
BP	GO:0071356	cellular response to tumor necrosis factor	38/1228	229/18723	1.08294e-07	4.06064e-06	2.82841e-06	CHI3L1/TMSB4X/CLDN1/LAPTM5/KRT8/KRT18/ICAM1/PTK2B/CCL19/CCL21/TRAF3IP2/TNFAIP3/CCL22/ZFP36/CCL5/TP53/HYAL1/TNF/EDN1/ZFP36L1/ZFP36L2/FAS/SGMS1/ASAH1/SFRP1/TRAF2/GAS6/TNFRSF13C/AKAP12/DAB2IP/TNFSF13B/TNFRSF19/ILK/TNFRSF1B/TRADD/NOL3/SPHK1/ADAMTS7	38
BP	GO:0043491	protein kinase B signaling	36/1228	211/18723	1.13978e-07	4.23512e-06	2.94994e-06	CHI3L1/TGFB1/HCLS1/GDF15/LOX/CCL19/CCL21/TMEM100/CCL5/CX3CR1/TNF/SFRP5/INPP5F/TSPYL5/RAMP3/ZFP36L1/HIP1/ADAM8/FGFR1/GAS6/F3/BANK1/HBEGF/KLF4/TNFAIP8L3/EPHA2/ILK/PIK3CD/SIRT2/AXL/RCN3/MEIS3/SOX9/PIK3R5/SEMA5A/IGF1R	36
BP	GO:1903038	negative regulation of leukocyte cell-cell adhesion	28/1228	141/18723	1.14463e-07	4.23512e-06	2.94994e-06	BCL6/CTLA4/LAPTM5/FGL2/HAVCR2/CD274/ANXA1/CCL21/SPN/FGL1/TNFAIP8L2/PTPN22/NCKAP1L/PDCD1LG2/CRTAM/BTN2A2/CXCL12/PTPN6/CD74/JAK3/KLF4/RUNX1/IL2RA/SDC4/LAX1/DTX1/FOXJ1/TBX21	28
BP	GO:0050777	negative regulation of immune response	34/1228	194/18723	1.31262e-07	4.82476e-06	3.36065e-06	SLAMF1/SAMSN1/CD96/BCL6/CTLA4/FGL2/STAT6/HAVCR2/ANXA1/TNFAIP3/IL1RL1/DUSP10/ISG15/PTPRC/IL7R/TREM2/NCKAP1L/FOXF1/NLRC3/INPP5D/HTRA1/AHR/PTPN6/JAK3/FYN/FGR/HCK/SAMHD1/SPI1/SIRT2/NMI/FOXJ1/TBX21/FURIN	34
BP	GO:0032102	negative regulation of response to external stimulus	57/1228	420/18723	1.35093e-07	4.93311e-06	3.43612e-06	PROS1/CD96/TNFAIP6/FGL2/PDGFRA/CXCL13/HAVCR2/TNFAIP3/DUSP10/ISG15/PTPRC/ZFP36/SERPINF2/SERPINF1/TREM2/AIF1/TNF/EDN1/INPP5F/PLAT/PLAU/SERPINE1/TNFAIP8L2/SMAD3/FOXF1/ANGPT2/NLRC3/HTRA1/ALOX5/SLIT2/SEMA6A/KLF4/FYN/ANXA2/GREM1/PADI2/FGR/IL2RA/SIRPA/HCK/SAMHD1/PTGIS/SERPINE2/UBASH3B/TNFRSF1B/ADAMTS18/SIRT2/APOE/NMI/SIGLEC10/SOCS3/MMP28/METRNL/PTGER4/SEMA5A/RIN3/FURIN	57
BP	GO:0050878	regulation of body fluid levels	53/1228	379/18723	1.40876e-07	5.09752e-06	3.55064e-06	AKR1B1/PROS1/CLDN1/TP63/FN1/FCER1G/TXK/PDGFRA/TRAF3IP2/F2RL2/ATP6V1B1/PLEK/PDPN/PLA2G4A/PLAUR/SERPINF2/ITGA2/GNAI2/CLIC1/EDN1/PLAT/PLAU/CD40LG/SERPINE1/SELP/ENTPD1/SLC29A1/F13A1/TFAP2B/EMP2/ADRA2A/FERMT3/ST3GAL4/FLI1/CHRM1/WAS/GAS6/F3/TFPI2/PTPN6/FBLN1/WFS1/ANXA2/ENTPD2/LCK/SERPINE2/DGKZ/ILK/UBASH3B/ADAMTS18/AXL/APOE/MED1	53
BP	GO:0002822	regulation of adaptive immune response based on somatic recombination of immune receptors built from immunoglobulin superfamily domains	31/1228	168/18723	1.4142e-07	5.09752e-06	3.55064e-06	SLAMF1/TGFB1/BCL6/CD1E/STAT6/CLEC7A/CLEC6A/HAVCR2/CD274/ANXA1/CCL19/TNFAIP3/IL1RL1/PLA2G4A/PTPRC/IL7R/TREM2/TNF/BTK/SASH3/NCKAP1L/NFKBID/TRAF2/WAS/AHR/PTPN6/JAK3/TNFSF13B/TNFRSF1B/FOXJ1/TBX21	31
BP	GO:0050766	positive regulation of phagocytosis	18/1228	66/18723	1.49293e-07	5.28366e-06	3.68029e-06	FCER1G/CLEC7A/PTPRC/ITGA2/TREM2/C2/TNF/IL2RG/NCKAP1L/GATA2/RAB31/GAS6/LRP1/PTX3/IL15RA/CAMK1D/SIRPA/DOCK2	18
BP	GO:0072678	T cell migration	18/1228	66/18723	1.49293e-07	5.28366e-06	3.68029e-06	CXCR3/APOD/S1PR1/MYO1G/CXCL13/ICAM1/CCL21/CCL5/AIF1/SPN/ITGA4/ADAM8/CXCL12/XG/CD99/ITGB7/PIK3CD/CXCL16	18
BP	GO:0022604	regulation of cell morphogenesis	46/1228	309/18723	1.50367e-07	5.28366e-06	3.68029e-06	ITGB2/S100B/ARHGAP15/FN1/PTN/RAC2/ICAM1/ANXA1/PTK2B/RHOJ/PDPN/TACSTD2/PLXNC1/CORO1A/FZD4/RHOD/CDC42EP2/SH3KBP1/PLEKHO1/S100A10/DVL3/EPS8/PARVB/FBLN1/KIT/PALM/DBN1/FYN/CAPZB/CDC42EP3/RHOQ/WASF3/FGR/FAM171A1/HCK/PREX1/ENPP2/CD44/ILK/CORO1C/UNC13D/DLG4/HEXB/ATP10A/FES/PLXNB1	46
BP	GO:0070372	regulation of ERK1 and ERK2 cascade	46/1228	309/18723	1.50367e-07	5.28366e-06	3.68029e-06	CHI3L1/SLAMF1/TGFB1/FN1/PDGFRA/ICAM1/HAVCR2/GLIPR2/PTK2B/CCL19/CCL21/DUSP10/PTPRC/CCL22/CCL5/SERPINF2/SCIMP/GNAI2/TREM2/TNF/PTPN22/RAMP3/ACKR3/TBC1D10C/GAS6/DUSP6/LRP1/TIMP3/PTPN6/FBLN1/CD74/PDGFRB/SEMA6A/WNK2/KLF4/AKAP12/CNKSR3/TNFAIP8L3/EPHA2/DAB2IP/SIRPA/CD44/GPBAR1/SPRY1/APOE/PDE8A	46
BP	GO:0014066	regulation of phosphatidylinositol 3-kinase signaling	24/1228	111/18723	1.73162e-07	6.04661e-06	4.21172e-06	HCLS1/FN1/ERBB3/PDGFRA/CCL5/TREM2/TNF/SELP/NCF1/NLRC3/PIK3AP1/FGFR1/PTPN6/KIT/PDGFRB/KLF4/FYN/DAB2IP/FGR/SERPINE2/PIK3IP1/SOX9/IGF1R/PLXNB1	24
BP	GO:0030178	negative regulation of Wnt signaling pathway	31/1228	170/18723	1.86471e-07	6.47089e-06	4.50724e-06	IGFBP4/SOSTDC1/SNAI2/TAX1BP3/DAB2/SFRP5/RNF213/MDFI/APCDD1/NFATC1/SFRP1/BICC1/FZD4/FRMD8/TRABD2B/GPC3/LRP1/EGR1/GREM1/NFATC4/DAB2IP/LRP4/TSKU/DKK3/APOE/SOX9/AXIN2/HIC1/MESP1/GSC/VGLL4	31
BP	GO:0048872	homeostasis of number of cells	42/1228	272/18723	1.87784e-07	6.47621e-06	4.51095e-06	HCLS1/BCL6/DOCK10/DNASE2/ANXA1/TRAF3IP2/TNFAIP3/ISG15/ZFP36/IL7R/CX3CR1/SASH3/CSF1/NCKAP1L/SLC46A2/ARID4A/ZFP36L1/GATA2/PMAIP1/CORO1A/GLIS2/LAT/CARD11/INPP5D/FAS/DOCK11/TSC22D3/KIT/CD74/JAK3/TNFSF13B/IL2RA/FAM210B/MAFB/IL7/SPI1/PIK3CD/AXL/BAX/SOX9/MED1/KLF13	42
BP	GO:0048732	gland development	58/1228	436/18723	2.09328e-07	7.17496e-06	4.99766e-06	TGFB1/UCP2/CLDN1/TP63/WLS/SOSTDC1/PTN/KRT18/STAT6/LEF1/PDGFRA/ANXA1/TNFAIP3/FGF7/TGFB3/TGM2/SULF1/SERPINF1/ITGA2/SERPINA5/TNF/FGL1/ARID5B/CSF1/SLC46A2/SMAD3/FOXF1/GATA2/SLC29A1/SFRP1/ZNF703/CAPN1/CPT1A/CRIP1/TSPO/WNT7B/FSTL3/PTPN3/EPHA2/EDAR/IRS2/RPS6KA1/LAMA5/MAFB/SULF2/LY6E/SERPINE2/DKK3/ELF3/BAX/SOX9/TBX2/MED1/RARA/MESP1/ALDH1A3/FOXA1/TGFBR2	58
BP	GO:0048660	regulation of smooth muscle cell proliferation	32/1228	180/18723	2.17783e-07	7.41923e-06	5.1678e-06	TGFB1/IGFBP3/MMP9/AKR1B1/APOD/XRCC5/S1PR1/TNFAIP3/TGFB3/TGM2/MMP2/CCL5/SERPINF2/ITGA2/GNAI2/AIF1/TNF/EDN1/PTAFR/CDKN1A/EFEMP2/VIPR2/PDGFRB/HBEGF/HPGD/KLF4/SOD2/ABCC4/ILK/PTGS2/APOE/TGFBR2	32
BP	GO:0050730	regulation of peptidyl-tyrosine phosphorylation	41/1228	264/18723	2.23606e-07	7.57143e-06	5.27382e-06	ITGB2/TGFB1/SAMSN1/HCLS1/ACVR1/ERBB3/GPRC5A/CLEC7A/CLEC6A/ICAM1/PTK2B/FGF7/CD3E/PTPRC/CCL5/TP53/TREM2/TNF/INPP5F/NCF1/AFAP1L2/ADRA2A/SFRP1/GAS6/EFNA1/ITGA5/PTPN6/KIT/BANK1/BST1/CD74/HBEGF/FYN/GREM1/ENPP2/IL7/LRP4/CD44/IL34/SOCS3/DLG4	41
BP	GO:0048568	embryonic organ development	57/1228	427/18723	2.36948e-07	7.97486e-06	5.55482e-06	MMP14/RARRES2/TGFB1/ACVR1/TBX15/KRT8/LEF1/PDGFRA/JUNB/TGFB3/VASH1/ATP6V1B1/OSR2/MMP16/TP53/HYAL1/TNF/EDN1/HOXC9/SMAD3/ZFP36L1/SNAI1/FOXF1/IFT122/GATA2/RUNX2/MDFI/KCNQ4/MED12/EFNA1/WNT7B/KIT/SEC24B/AHI1/MTHFD1L/EPHA2/EFEMP1/MAFB/USH1C/PRRX1/TEAD2/FLT3LG/SOCS3/SOX9/TBX2/HOXB2/MED1/RARA/FZD2/PLCD3/FOXI1/MESP1/GSC/NR2F2/ASB2/ALDH1A3/TGFBR2	57
BP	GO:0033630	positive regulation of cell adhesion mediated by integrin	10/1228	21/18723	2.57095e-07	8.60115e-06	5.99106e-06	CXCL13/IFT74/CCL21/CD3E/CCL5/ADAM9/NCKAP1L/PODXL/PTPN6/SKAP1	10
BP	GO:0071559	response to transforming growth factor beta	40/1228	256/18723	2.65791e-07	8.83913e-06	6.15682e-06	TGFB1/CLDN1/ACVR1/PDE3A/RASL11B/GDF15/LOX/TGFB3/TP53/DAB2/CX3CR1/EDN1/ADAM9/SMAD3/ZFP36L1/ZFP36L2/VASN/HTRA1/SFRP1/ZNF703/LTBP3/MXRA5/CLDN5/ZYX/HTRA3/GIPC1/HPGD/CDKN2B/FYN/LTBP2/SMAD9/PMEPA1/SPI1/DKK3/SPRY1/SMAD1/ZEB2/SOX9/FURIN/TGFBR2	40
BP	GO:0050868	negative regulation of T cell activation	25/1228	122/18723	2.8824e-07	9.52897e-06	6.63732e-06	BCL6/CTLA4/LAPTM5/FGL2/HAVCR2/CD274/ANXA1/SPN/FGL1/TNFAIP8L2/PTPN22/NCKAP1L/PDCD1LG2/CRTAM/BTN2A2/PTPN6/CD74/JAK3/RUNX1/IL2RA/SDC4/LAX1/DTX1/FOXJ1/TBX21	25
BP	GO:1903707	negative regulation of hemopoiesis	23/1228	106/18723	2.90865e-07	9.55918e-06	6.65837e-06	BCL6/CTLA4/FGL2/ANXA1/GPR137B/TMEM176B/C1QC/GATA2/INPP5D/SFRP1/TMEM176A/CD74/FSTL3/JAK3/RUNX1/IL17D/MAFB/MYC/UBASH3B/DTX1/FOXJ1/TBX21/RARA	23
BP	GO:0045582	positive regulation of T cell differentiation	21/1228	91/18723	3.17585e-07	1.03763e-05	7.22752e-06	BCL6/TESPA1/LEF1/ANXA1/CCL19/VNN1/DUSP10/PTPRC/IL7R/SASH3/NCKAP1L/NFKBID/CD83/ADAM8/BAD/CD74/RUNX1/IL2RA/IL7/RARA/TGFBR2	21
BP	GO:0097530	granulocyte migration	28/1228	148/18723	3.29468e-07	1.0702e-05	7.45437e-06	ITGB2/SLAMF1/RARRES2/FCER1G/S100A14/RAC2/CXCL13/ANXA1/CCL19/CCL21/CCL22/CCL5/TREM1/EDN1/CSF1/NCKAP1L/ADAM8/XG/CD99/SLIT2/BST1/CD74/CAMK1D/PREX1/PIK3CD/IL34/PTGER4/HRH1	28
BP	GO:0002444	myeloid leukocyte mediated immunity	22/1228	99/18723	3.38199e-07	1.08593e-05	7.56395e-06	ITGB2/S100A13/RAC2/TRAF3IP2/TYROBP/MILR1/CX3CR1/TREM1/ITGAM/BTK/FOXF1/PTAFR/LAT2/GATA2/LAT/KIT/SPON2/FGR/SPI1/PIK3CD/UNC13D/FES	22
BP	GO:0008630	intrinsic apoptotic signaling pathway in response to DNA damage	22/1228	99/18723	3.38199e-07	1.08593e-05	7.56395e-06	TP63/SNAI2/TP53/BCL2A1/TNF/SNAI1/FNIP2/CDKN1A/ACKR3/CXCL12/BAD/CRIP1/ZNF385A/CD74/EPHA2/NFATC4/CD44/USP28/TNFRSF1B/BCL3/BAX/HIC1	22
BP	GO:0030278	regulation of ossification	24/1228	115/18723	3.47686e-07	1.09937e-05	7.6576e-06	TGFB1/ACVR1/S1PR1/PTN/PTK2B/TGFB3/OSR2/ISG15/SRGN/CSF1/SMAD3/RUNX2/SFRP1/ALOX5/EGR2/IFITM5/LTBP3/MGP/ENPP1/GREM1/LRP4/TMEM119/SOX9/PTGER4	24
BP	GO:0071675	regulation of mononuclear cell migration	24/1228	115/18723	3.47686e-07	1.09937e-05	7.6576e-06	SLAMF1/RARRES2/APOD/S100A14/CXCL13/PTK2B/CCL21/CCL5/LGMN/CX3CR1/AIF1/TNF/SPN/SERPINE1/CSF1/ITGA4/ADAM8/CXCL12/GAS6/SLIT2/GREM1/PADI2/SPI1/IL34	24
BP	GO:0030111	regulation of Wnt signaling pathway	47/1228	328/18723	3.48289e-07	1.09937e-05	7.6576e-06	IGFBP4/TGFB1/WLS/SOSTDC1/LEF1/TNFAIP3/SNAI2/SULF1/PLEKHA4/TAX1BP3/DAB2/SFRP5/SMAD3/RNF213/MDFI/APCDD1/NFATC1/HHEX/SFRP1/ZNF703/BICC1/FZD4/FRMD8/TRABD2B/GPC3/LRP1/EGR1/WNK2/GREM1/NFATC4/DAB2IP/SULF2/LRP4/TSKU/ILK/DKK3/FZD7/CDH3/ZEB2/APOE/SOX9/AXIN2/HIC1/SEMA5A/MESP1/GSC/VGLL4	47
BP	GO:0019722	calcium-mediated signaling	34/1228	202/18723	3.54249e-07	1.1119e-05	7.74488e-06	CXCR3/CLEC7A/PTK2B/PLEK/CD3E/PTPRC/TMEM100/CX3CR1/CCR8/LMCD1/CCRL2/CCR5/TREM2/TNF/EDN1/BTK/CLIC2/SELP/LAT2/NFATC1/ACKR3/LAT/CHP2/TBC1D10C/BST1/HOMER3/TRPM2/NFATC4/FHL2/RCAN3/SPHK1/PPP1R9B/PRKAA1/NFATC2	34
BP	GO:0048659	smooth muscle cell proliferation	32/1228	184/18723	3.64944e-07	1.13907e-05	7.93412e-06	TGFB1/IGFBP3/MMP9/AKR1B1/APOD/XRCC5/S1PR1/TNFAIP3/TGFB3/TGM2/MMP2/CCL5/SERPINF2/ITGA2/GNAI2/AIF1/TNF/EDN1/PTAFR/CDKN1A/EFEMP2/VIPR2/PDGFRB/HBEGF/HPGD/KLF4/SOD2/ABCC4/ILK/PTGS2/APOE/TGFBR2	32
BP	GO:0016055	Wnt signaling pathway	58/1228	444/18723	3.87812e-07	1.19719e-05	8.33891e-06	IGFBP4/TGFB1/WLS/SOSTDC1/LEF1/TNFAIP3/GPC6/SNAI2/SULF1/PLEKHA4/TAX1BP3/DAB2/MITF/SFRP5/SMAD3/RNF213/MDFI/APCDD1/NFATC1/HHEX/SFRP1/ZNF703/BICC1/FZD4/FRMD8/MED12/TRABD2B/GPC3/DVL3/FZD1/LRP1/WNT7B/EGR1/TCF7/WNK2/KLF4/GREM1/NFATC4/DAB2IP/SULF2/LRP4/TSKU/ILK/DKK3/FZD7/CDH3/ZEB2/APOE/SOX9/AXIN2/HIC1/FZD2/FBXW11/PRKAA1/SEMA5A/MESP1/GSC/VGLL4	58
BP	GO:0071560	cellular response to transforming growth factor beta stimulus	39/1228	250/18723	3.89834e-07	1.19719e-05	8.33891e-06	TGFB1/CLDN1/ACVR1/PDE3A/RASL11B/GDF15/LOX/TGFB3/TP53/DAB2/CX3CR1/EDN1/ADAM9/SMAD3/ZFP36L1/ZFP36L2/VASN/HTRA1/SFRP1/ZNF703/LTBP3/CLDN5/ZYX/HTRA3/GIPC1/HPGD/CDKN2B/FYN/LTBP2/SMAD9/PMEPA1/SPI1/DKK3/SPRY1/SMAD1/ZEB2/SOX9/FURIN/TGFBR2	39
BP	GO:0022617	extracellular matrix disassembly	17/1228	63/18723	3.89991e-07	1.19719e-05	8.33891e-06	MMP14/TGFB1/MMP9/CTSK/CTSS/MMP7/PDPN/MMP2/ADAMTS4/FLOT1/FSCN1/ADAM8/LRP1/MMP19/MMP11/SH3PXD2B/FURIN	17
BP	GO:0033674	positive regulation of kinase activity	60/1228	467/18723	4.33881e-07	1.32464e-05	9.22667e-06	CHI3L1/TGFB1/XRCC5/ERBB3/GPRC5A/PDGFRA/PTK2B/CCL19/CCL21/CDC25B/PTPRC/CCL5/MAP2K6/TREM2/TNF/EDN1/ADAM9/CSF1/NCKAP1L/PARP16/CD19/CDKN1A/NCF1/EMP2/LAT/EPHB4/AFAP1L2/ADAM8/ADRA2A/FGFR1/VEGFC/BAD/FZD4/TRAF2/GAS6/EFNA1/EPHB6/DVL3/KIT/CD74/PDGFRB/HBEGF/EGR1/SASH1/TNFAIP8L3/GREM1/EPHA2/DAB2IP/FGR/EEF1A2/SDC4/DGKZ/ILK/IL34/RALB/AXL/DLG4/PIK3R5/IGF1R/TGFBR2	60
BP	GO:0198738	cell-cell signaling by wnt	58/1228	446/18723	4.5091e-07	1.36475e-05	9.50608e-06	IGFBP4/TGFB1/WLS/SOSTDC1/LEF1/TNFAIP3/GPC6/SNAI2/SULF1/PLEKHA4/TAX1BP3/DAB2/MITF/SFRP5/SMAD3/RNF213/MDFI/APCDD1/NFATC1/HHEX/SFRP1/ZNF703/BICC1/FZD4/FRMD8/MED12/TRABD2B/GPC3/DVL3/FZD1/LRP1/WNT7B/EGR1/TCF7/WNK2/KLF4/GREM1/NFATC4/DAB2IP/SULF2/LRP4/TSKU/ILK/DKK3/FZD7/CDH3/ZEB2/APOE/SOX9/AXIN2/HIC1/FZD2/FBXW11/PRKAA1/SEMA5A/MESP1/GSC/VGLL4	58
BP	GO:0031295	T cell costimulation	14/1228	44/18723	4.51905e-07	1.36475e-05	9.50608e-06	CD274/CCL19/CCL21/CD3E/CD40LG/PDCD1LG2/CARD11/PTPN6/LGALS1/TNFRSF13C/FYN/TNFSF13B/MAP3K8/LCK	14
BP	GO:0045765	regulation of angiogenesis	48/1228	342/18723	4.88041e-07	1.46596e-05	1.0211e-05	CHI3L1/CTSH/S100A1/GADD45A/PTN/CXCL13/ECSCR/PTK2B/TNFAIP3/PKM/RHOJ/VASH1/SULF1/SERPINF1/CX3CR1/HYAL1/TNF/SERPINE1/PRKCB/ANGPT2/GATA2/ITGAX/EMP2/HHEX/SFRP1/VEGFC/ALOX5/VEGFB/CLDN5/F3/EFNA1/ITGA5/SEMA6A/KLF4/RUNX1/SASH1/THBS2/GREM1/EPHA2/DAB2IP/PTGIS/ENPP2/PIK3CD/SMAD1/SPHK1/TNFSF12/SEMA5A/TGFBR2	48
BP	GO:0071622	regulation of granulocyte chemotaxis	15/1228	51/18723	5.55417e-07	1.65942e-05	1.15585e-05	SLAMF1/RARRES2/S100A14/RAC2/CCL19/CCL21/CCL5/EDN1/CSF1/NCKAP1L/SLIT2/BST1/CD74/CAMK1D/IL34	15
BP	GO:0014068	positive regulation of phosphatidylinositol 3-kinase signaling	19/1228	79/18723	5.81547e-07	1.72824e-05	1.20379e-05	HCLS1/FN1/ERBB3/PDGFRA/CCL5/TREM2/TNF/SELP/NCF1/PIK3AP1/FGFR1/PTPN6/KIT/PDGFRB/FYN/FGR/SOX9/IGF1R/PLXNB1	19
BP	GO:1902106	negative regulation of leukocyte differentiation	22/1228	102/18723	5.84821e-07	1.72878e-05	1.20417e-05	BCL6/CTLA4/FGL2/ANXA1/GPR137B/TMEM176B/C1QC/GATA2/INPP5D/SFRP1/TMEM176A/CD74/FSTL3/JAK3/RUNX1/MAFB/MYC/UBASH3B/DTX1/FOXJ1/TBX21/RARA	22
BP	GO:0002699	positive regulation of immune effector process	37/1228	235/18723	6.10164e-07	1.7942e-05	1.24974e-05	ITGB2/SLAMF1/TGFB1/LAPTM5/CD244/CD1E/STAT6/RAC2/CLEC7A/ANXA1/CCL19/PTPRC/TYROBP/SCIMP/TREM2/TNF/ITGAM/BTK/SH2D1A/SASH3/PTPN22/CRTAM/FOXF1/NFKBID/PTAFR/GATA2/HK1/TRAF2/KIT/SPON2/CD74/FGR/SPI1/UNC13D/TBX21/RARA/FES	37
BP	GO:0070227	lymphocyte apoptotic process	18/1228	72/18723	6.19944e-07	1.81342e-05	1.26312e-05	BCL6/CD274/TRAF3IP2/CCL5/TP53/IL7R/BTK/SLC46A2/FAS/ADAM8/TSC22D3/EFNA1/CD74/JAK3/IRS2/IL2RA/NOC2L/BAX	18
BP	GO:0032970	regulation of actin filament-based process	53/1228	397/18723	6.23228e-07	1.81353e-05	1.2632e-05	TMSB4X/HCLS1/S1PR1/RAC2/PDGFRA/ICAM1/FCHSD1/PTK2B/CCL21/TGFB3/PLEK/PDPN/COTL1/SERPINF2/EDN1/TACSTD2/NCKAP1L/SMAD3/ADD3/CORO1A/FSCN1/LIMK1/SFRP1/CXCL12/RHOD/CDC42EP2/WAS/S100A10/SCIN/LRP1/EPS8/ARHGDIB/SH3BP1/PDXP/SLIT2/BST1/PDGFRB/DBN1/TRPM2/CAPZB/CDC42EP3/RHOQ/TMSB10/WASF3/HCK/SDC4/PREX1/ILK/FHOD1/ABI3/PTGER4/SEMA5A/FES	53
BP	GO:0071677	positive regulation of mononuclear cell migration	17/1228	65/18723	6.34591e-07	1.83703e-05	1.27957e-05	SLAMF1/S100A14/CXCL13/PTK2B/CCL21/CCL5/LGMN/CX3CR1/AIF1/TNF/SPN/SERPINE1/ITGA4/ADAM8/CXCL12/GAS6/SPI1	17
BP	GO:0060562	epithelial tube morphogenesis	46/1228	325/18723	6.60807e-07	1.90306e-05	1.32556e-05	MMP14/TGFB1/CTSH/ACVR1/SOSTDC1/LEF1/KLHL3/EDNRA/TNF/EDN1/TACSTD2/CSF1/SMAD3/FOXF1/IFT122/ITGAX/SFRP1/MED12/GPC3/DVL3/PODXL/SEC24B/SLIT2/AHI1/MTHFD1L/GREM1/EPHA2/NFATC4/LAMA5/CTSZ/SDC4/MYC/ILK/DCHS1/PIK3CD/SPRY1/TEAD2/SOX9/TBX2/MED1/RARA/FZD2/MESP1/ASB2/FOXA1/TGFBR2	46
BP	GO:0045639	positive regulation of myeloid cell differentiation	22/1228	103/18723	6.98174e-07	2.00036e-05	1.39333e-05	TGFB1/HCLS1/LEF1/ISG15/TYROBP/EVI2B/TREM2/TNF/CSF1/NCKAP1L/ZFP36L1/GATA2/INPP5D/SCIN/CD74/RUNX1/FAM210B/KLF10/TESC/IL34/MED1/FES	22
BP	GO:0070098	chemokine-mediated signaling pathway	20/1228	88/18723	7.83225e-07	2.23259e-05	1.55509e-05	CXCR3/ACKR1/CXCL13/PTK2B/CCL19/CCL21/CCL22/CCL5/CX3CR1/CCR8/CCRL2/CCR5/TREM2/EDN1/GPR35/ACKR3/CXCL12/SLIT2/PADI2/SLIT3	20
BP	GO:0051897	positive regulation of protein kinase B signaling	24/1228	120/18723	7.89974e-07	2.2404e-05	1.56053e-05	CHI3L1/TGFB1/HCLS1/GDF15/CCL19/CCL21/CX3CR1/TNF/TSPYL5/RAMP3/HIP1/ADAM8/FGFR1/GAS6/F3/HBEGF/TNFAIP8L3/ILK/PIK3CD/AXL/MEIS3/PIK3R5/SEMA5A/IGF1R	24
BP	GO:0043087	regulation of GTPase activity	48/1228	348/18723	8.15373e-07	2.28919e-05	1.59452e-05	BCL6/ARHGAP15/DOCK10/S1PR1/CXCL13/ICAM1/ARAP3/TBC1D2/PTK2B/CCL19/CCL21/ARHGAP25/TGM2/RGS16/CCL22/CCL5/TAX1BP3/TBC1D2B/GPR137B/ARL2/PLXNC1/SFRP1/TBC1D10C/RASGRP2/DOCK11/DOCK7/BCAR3/ARHGAP29/S100A10/DVL3/ARHGAP9/SH3BP1/ARHGAP45/RASAL3/GMIP/EPHA2/DAB2IP/TBC1D13/GPSM1/PREX1/RABGAP1L/RASAL2/CORO1C/SPRY1/TBC1D9/FOXJ1/ABR/PLXNB1	48
BP	GO:1901342	regulation of vasculature development	48/1228	348/18723	8.15373e-07	2.28919e-05	1.59452e-05	CHI3L1/CTSH/S100A1/GADD45A/PTN/CXCL13/ECSCR/PTK2B/TNFAIP3/PKM/RHOJ/VASH1/SULF1/SERPINF1/CX3CR1/HYAL1/TNF/SERPINE1/PRKCB/ANGPT2/GATA2/ITGAX/EMP2/HHEX/SFRP1/VEGFC/ALOX5/VEGFB/CLDN5/F3/EFNA1/ITGA5/SEMA6A/KLF4/RUNX1/SASH1/THBS2/GREM1/EPHA2/DAB2IP/PTGIS/ENPP2/PIK3CD/SMAD1/SPHK1/TNFSF12/SEMA5A/TGFBR2	48
BP	GO:0046632	alpha-beta T cell differentiation	23/1228	112/18723	8.19488e-07	2.28924e-05	1.59455e-05	BCL6/STAT6/CRACR2A/LEF1/ITK/ANXA1/CCL19/CTSL/TNFSF8/BATF/SPN/SASH3/NCKAP1L/NFKBID/ZNF683/CD83/JAK3/RUNX1/BCL3/TBX21/RARA/PTGER4/TGFBR2	23
BP	GO:0031294	lymphocyte costimulation	14/1228	46/18723	8.33116e-07	2.31573e-05	1.613e-05	CD274/CCL19/CCL21/CD3E/CD40LG/PDCD1LG2/CARD11/PTPN6/LGALS1/TNFRSF13C/FYN/TNFSF13B/MAP3K8/LCK	14
BP	GO:0050869	negative regulation of B cell activation	12/1228	34/18723	8.5158e-07	2.35533e-05	1.64059e-05	SAMSN1/BCL6/CTLA4/LAPTM5/TNFAIP3/TYROBP/BTK/INPP5D/SFRP1/TBC1D10C/BANK1/FOXJ1	12
BP	GO:0061138	morphogenesis of a branching epithelium	31/1228	182/18723	8.82617e-07	2.42915e-05	1.69201e-05	MMP14/CTSH/TP63/ACVR1/LEF1/FGF7/TGM2/SULF1/EDNRA/TNF/EDN1/TACSTD2/CSF1/FOXF1/SFRP1/GPC3/SLIT2/GREM1/EPHA2/NFATC4/LAMA5/CTSZ/MYC/ILK/DCHS1/SPRY1/SOCS3/SOX9/MED1/FOXA1/TGFBR2	31
BP	GO:0001704	formation of primary germ layer	24/1228	121/18723	9.25018e-07	2.53337e-05	1.7646e-05	ITGB2/MMP14/MMP9/ACVR1/FN1/WLS/LEF1/MMP2/ITGA2/SMAD3/DUSP2/ITGA4/SNAI1/FOXF1/MESP2/ITGA5/KLF4/COL12A1/EPHA2/ATOH8/FZD7/SMAD1/ITGB4/MESP1	24
BP	GO:0002449	lymphocyte mediated immunity	48/1228	350/18723	9.63951e-07	2.62712e-05	1.8299e-05	SLAMF1/TGFB1/CTSH/CD96/BCL6/C1QB/C1QA/FCER1G/SLAMF7/CD1E/MYO1G/STAT6/C1R/ICAM1/HAVCR2/TRAF3IP2/BATF/PTPRC/C7/IL7R/TREM2/C2/TNF/PRF1/BTK/SH2D1A/SASH3/CD40LG/NCKAP1L/CRTAM/C1QC/CD19/TLR8/CORO1A/EMP2/INPP5D/CTSC/TRAF2/WAS/AHR/PTPN6/CD74/RFTN1/TNFRSF1B/BCL3/FOXJ1/UNC13D/TBX21	48
BP	GO:1990868	response to chemokine	21/1228	97/18723	9.83483e-07	2.65445e-05	1.84894e-05	CXCR3/ACKR1/CXCL13/LOX/PTK2B/CCL19/CCL21/CCL22/CCL5/CX3CR1/CCR8/CCRL2/CCR5/TREM2/EDN1/GPR35/ACKR3/CXCL12/SLIT2/PADI2/SLIT3	21
BP	GO:1990869	cellular response to chemokine	21/1228	97/18723	9.83483e-07	2.65445e-05	1.84894e-05	CXCR3/ACKR1/CXCL13/LOX/PTK2B/CCL19/CCL21/CCL22/CCL5/CX3CR1/CCR8/CCRL2/CCR5/TREM2/EDN1/GPR35/ACKR3/CXCL12/SLIT2/PADI2/SLIT3	21
BP	GO:0045055	regulated exocytosis	36/1228	230/18723	9.95926e-07	2.67511e-05	1.86333e-05	ITGB2/S100A13/RAC2/PLEK/MILR1/GNAI2/ITGAM/BTK/NCKAP1L/FOXF1/PTAFR/PRKCB/LAT2/GATA2/RAB31/CORO1A/LAT/ADRA2A/SYT7/SYT8/TRPV6/SCIN/KIT/GIPC1/MICAL1/ABCC4/FGR/HCK/KCNB1/SPI1/SYT13/PIK3CD/UNC13D/DOC2B/FES/STX1A	36
BP	GO:0050731	positive regulation of peptidyl-tyrosine phosphorylation	32/1228	193/18723	1.09256e-06	2.92063e-05	2.03434e-05	TGFB1/HCLS1/ACVR1/ERBB3/CLEC7A/CLEC6A/ICAM1/PTK2B/FGF7/CD3E/PTPRC/CCL5/TP53/TREM2/TNF/NCF1/AFAP1L2/ADRA2A/GAS6/EFNA1/ITGA5/KIT/BANK1/CD74/HBEGF/FYN/GREM1/ENPP2/LRP4/CD44/IL34/DLG4	32
BP	GO:0050673	epithelial cell proliferation	56/1228	437/18723	1.1389e-06	3.03003e-05	2.11054e-05	IGFBP4/MMP14/TGFB1/CLDN1/TP63/NRP2/PTN/STAT6/IFT74/TNFAIP3/FGF7/VASH1/SNAI2/SULF1/OSR2/DUSP10/ZFP36/SERPINF1/HYAL1/TNF/FGL1/SMAD3/ZFP36L1/ITGA4/GATA2/NLRC3/HTRA1/FGFR1/SFRP1/VEGFC/ZNF703/CXCL12/ALOX5/VEGFB/BAD/GPC3/F3/KIT/CDKN2B/EPHA2/ATOH8/DAB2IP/RPS6KA1/SULF2/MYC/GPBAR1/PIK3CD/FZD7/CDH3/APOE/BAX/SOX9/TNFSF12/MED1/SEMA5A/NR2F2	56
BP	GO:0070228	regulation of lymphocyte apoptotic process	15/1228	54/18723	1.25107e-06	3.31266e-05	2.30741e-05	BCL6/CD274/CCL5/TP53/IL7R/BTK/SLC46A2/ADAM8/TSC22D3/EFNA1/CD74/JAK3/IRS2/NOC2L/BAX	15
BP	GO:0007369	gastrulation	31/1228	185/18723	1.26833e-06	3.34253e-05	2.32821e-05	ITGB2/MMP14/MMP9/ACVR1/FN1/WLS/LEF1/IL1RN/MMP2/TP53/ITGA2/UGDH/SMAD3/DUSP2/ITGA4/SNAI1/FOXF1/MESP2/SFRP1/GPC3/ITGA5/KLF4/COL12A1/EPHA2/ATOH8/FZD7/SMAD1/ITGB4/MESP1/GSC/TGFBR2	31
BP	GO:0043367	CD4-positive, alpha-beta T cell differentiation	19/1228	83/18723	1.30843e-06	3.43202e-05	2.39054e-05	BCL6/STAT6/CRACR2A/LEF1/ANXA1/CCL19/CTSL/BATF/SPN/SASH3/NCKAP1L/NFKBID/CD83/JAK3/RUNX1/BCL3/TBX21/RARA/PTGER4	19
BP	GO:0030852	regulation of granulocyte differentiation	8/1228	15/18723	1.42169e-06	3.69403e-05	2.57305e-05	HCLS1/LEF1/EVI2B/C1QC/INPP5D/RUNX1/TESC/RARA	8
BP	GO:0071706	tumor necrosis factor superfamily cytokine production	31/1228	186/18723	1.42816e-06	3.69403e-05	2.57305e-05	SLAMF1/CLEC7A/CD14/HAVCR2/CD274/CCL19/IFNGR1/TNFAIP3/PTPRC/TYROBP/ZFP36/CX3CR1/TREM2/SPN/SASH3/PTPN22/PTAFR/NLRC3/ADAM8/FRMD8/GAS6/PTPN6/TSPO/SPON2/AKAP8/AKAP12/NFATC4/SIRPA/AXL/BCL3/RARA	31
BP	GO:1903555	regulation of tumor necrosis factor superfamily cytokine production	31/1228	186/18723	1.42816e-06	3.69403e-05	2.57305e-05	SLAMF1/CLEC7A/CD14/HAVCR2/CD274/CCL19/IFNGR1/TNFAIP3/PTPRC/TYROBP/ZFP36/CX3CR1/TREM2/SPN/SASH3/PTPN22/PTAFR/NLRC3/ADAM8/FRMD8/GAS6/PTPN6/TSPO/SPON2/AKAP8/AKAP12/NFATC4/SIRPA/AXL/BCL3/RARA	31
BP	GO:0002260	lymphocyte homeostasis	16/1228	62/18723	1.64042e-06	4.22159e-05	2.94051e-05	DOCK10/TRAF3IP2/TNFAIP3/NCKAP1L/SLC46A2/PMAIP1/CORO1A/LAT/FAS/DOCK11/TSC22D3/CD74/JAK3/TNFSF13B/IL2RA/BAX	16
BP	GO:0048863	stem cell differentiation	33/1228	206/18723	1.64723e-06	4.22159e-05	2.94051e-05	TP63/ACVR1/NRP2/FN1/XRCC5/PTN/KRT18/PDGFRA/BATF/SNAI2/PTPRC/EDNRA/TP53/MEOX1/EDN1/TACSTD2/ZFP36L2/RUNX2/SFRP1/LTBP3/FZD1/KIT/TCOF1/SEMA6A/GREM1/LAMA5/CORO1C/TEAD2/SOX9/TBX2/SEMA5A/GSC/FOXA1	33
BP	GO:0030890	positive regulation of B cell proliferation	13/1228	42/18723	1.65885e-06	4.23197e-05	2.94774e-05	BCL6/PTPRC/SASH3/NCKAP1L/CDKN1A/CARD11/TNFRSF13C/BST1/CD74/TNFSF13B/IRS2/IL7/NFATC2	13
BP	GO:0071621	granulocyte chemotaxis	24/1228	125/18723	1.70488e-06	4.32963e-05	3.01577e-05	ITGB2/SLAMF1/RARRES2/FCER1G/S100A14/RAC2/CXCL13/ANXA1/CCL19/CCL21/CCL22/CCL5/TREM1/EDN1/CSF1/NCKAP1L/SLIT2/BST1/CD74/CAMK1D/PREX1/PIK3CD/IL34/HRH1	24
BP	GO:0002691	regulation of cellular extravasation	12/1228	36/18723	1.71941e-06	4.34675e-05	3.02769e-05	ICAM1/CCL21/ITGA4/SELP/PTAFR/ADAM8/CXCL12/ST3GAL4/XG/CD99/BST1/PTGER4	12
BP	GO:0052548	regulation of endopeptidase activity	55/1228	432/18723	1.73656e-06	4.37034e-05	3.04413e-05	CTSH/MMP9/TIMP1/PROS1/TP63/LAPTM5/CLEC7A/TNFAIP8/SPINK9/PLAUR/BCL2L12/SERPINF2/SERPINF1/NAIP/LGMN/SERPINA5/TNF/SERPINE1/LAMP3/SMAD3/SERPINB12/PMAIP1/HIP1/COL6A3/TFAP4/FAS/BAD/CTSD/GAS6/RENBP/F3/EFNA1/TFPI2/TIMP3/RARRES1/SPOCK1/ACER2/ANP32B/KLF4/FYN/MICAL1/PAPLN/ANXA2/RPS6KA1/IFI6/LCK/MYC/SERPINE2/CD44/SORL1/PTGS2/NOL3/BAX/TIMP2/FURIN	55
BP	GO:0022411	cellular component disassembly	56/1228	443/18723	1.75299e-06	4.39192e-05	3.05915e-05	MMP14/TGFB1/MMP9/C1QB/C1QA/CTSK/CTSS/DNASE2/VTA1/TGFB3/PLEK/SNAI2/MMP7/PDPN/MMP2/TP53/CX3CR1/TREM2/TNF/ITGAM/LIX1L/C1QC/PRKCB/ADD3/ADAMTS4/FLOT1/GSPT1/FSCN1/ADAM8/GSPT2/SCIN/LRP1/SMARCC2/MMP19/EPS8/SH3BP1/PDXP/TSPO/MAP1S/SQSTM1/BNIP3L/MICAL1/PADI2/CAPZB/NEK6/MYC/MMP11/BAX/USP36/VMP1/PPP1R9B/SH3PXD2B/SEMA5A/IGF1R/FURIN/SCAF8	56
BP	GO:0008154	actin polymerization or depolymerization	34/1228	218/18723	2.14321e-06	5.34558e-05	3.72342e-05	TMSB4X/HCLS1/ICAM1/FCHSD1/PTK2B/CCL21/PLEK/COTL1/PSTPIP1/AIF1/PSTPIP2/NCKAP1L/ADD3/CORO1A/CXCL12/CDC42EP2/WAS/SCIN/EPS8/SH3BP1/PDXP/SLIT2/DBN1/MICAL1/CAPZB/CDC42EP3/TMSB10/WASF3/HCK/PREX1/GAS7/WIPF1/PPP1R9B/SEMA5A	34
BP	GO:0030500	regulation of bone mineralization	18/1228	78/18723	2.18433e-06	5.42392e-05	3.77799e-05	TGFB1/ACVR1/S1PR1/PTN/PTK2B/TGFB3/OSR2/ISG15/SRGN/SMAD3/ALOX5/IFITM5/LTBP3/MGP/ENPP1/GREM1/TMEM119/SOX9	18
BP	GO:0042088	T-helper 1 type immune response	13/1228	43/18723	2.23563e-06	5.52677e-05	3.84962e-05	SLAMF1/STAT6/CRACR2A/LEF1/EBI3/HAVCR2/ANXA1/CCL19/IL1RL1/PLA2G4A/SPN/JAK3/BCL3	13
BP	GO:0035710	CD4-positive, alpha-beta T cell activation	21/1228	102/18723	2.33358e-06	5.74347e-05	4.00057e-05	BCL6/STAT6/CRACR2A/LEF1/CD274/ANXA1/CCL19/CTSL/BATF/SPN/SASH3/NCKAP1L/NFKBID/CD83/JAK3/RUNX1/BCL3/TBX21/RARA/PTGER4/TGFBR2	21
BP	GO:0090218	positive regulation of lipid kinase activity	12/1228	37/18723	2.39341e-06	5.86491e-05	4.08516e-05	TGFB1/PDGFRA/PTK2B/CCL19/CCL21/CD19/KIT/PDGFRB/TNFAIP8L3/FGR/EEF1A2/DGKZ	12
BP	GO:0043550	regulation of lipid kinase activity	17/1228	71/18723	2.41895e-06	5.9016e-05	4.11071e-05	TGFB1/PDGFRA/PTK2B/CCL19/CCL21/CD19/KIT/PDGFRB/KLF4/TNFAIP8L3/DAB2IP/FGR/EEF1A2/DGKZ/PIK3IP1/SOCS3/PIK3R5	17
BP	GO:0043542	endothelial cell migration	40/1228	279/18723	2.52262e-06	6.12778e-05	4.26825e-05	TMSB4X/TGFB1/NRP2/S100A2/GADD45A/PTN/CXCL13/ANXA1/PTK2B/RHOJ/VASH1/SERPINF1/CLEC14A/LGMN/TNF/EDN1/ANGPT2/GATA2/EMP2/EPHB4/FGFR1/VEGFC/SRPX2/EFNA1/SH3BP1/SLIT2/GIPC1/KLF4/SASH1/GREM1/EPHA2/ATOH8/DAB2IP/PIK3CD/PTGS2/APOE/TNFSF12/SEMA5A/NR2F2/DNAJA4	40
BP	GO:0002448	mast cell mediated immunity	14/1228	50/18723	2.54303e-06	6.15062e-05	4.28416e-05	S100A13/RAC2/MILR1/BTK/FOXF1/LAT2/GATA2/LAT/KIT/SPON2/FGR/PIK3CD/UNC13D/FES	14
BP	GO:0048705	skeletal system morphogenesis	34/1228	220/18723	2.64177e-06	6.30024e-05	4.38838e-05	MMP14/TBX15/PDGFRA/TGFB3/OSR2/MMP16/MMP2/HYAL1/ARID5B/HOXC9/SMAD3/RUNX2/MDFI/FGFR1/SFRP1/SGPL1/IFITM5/LTBP3/MED12/MGP/COL27A1/MTHFD1L/GREM1/FGR/TSKU/PRRX1/TMEM119/SOX9/AXIN2/HOXB2/RARA/MSX2/GSC/TGFBR2	34
BP	GO:0033619	membrane protein proteolysis	15/1228	57/18723	2.64682e-06	6.30024e-05	4.38838e-05	TGFB1/CTSH/TIMP1/MMP7/TNF/ADAM9/ADAM8/ADRA2A/TIMP3/PTPN3/TNFRSF1B/APOE/NAPSA/TIMP2/FURIN	15
BP	GO:0061756	leukocyte adhesion to vascular endothelial cell	15/1228	57/18723	2.64682e-06	6.30024e-05	4.38838e-05	ITGB2/ICAM1/CCL21/CX3CR1/TNF/SPN/ITGA4/SELP/PTAFR/CXCL12/ALOX5/ST3GAL4/ITGB7/KLF4/SELL	15
BP	GO:0019216	regulation of lipid metabolic process	45/1228	331/18723	2.65e-06	6.30024e-05	4.38838e-05	ELOVL5/RARRES2/TGFB1/APOD/PDK4/ETFBKMT/PDGFRA/ANXA1/PTK2B/CCL19/CCL21/SNAI2/TREM2/TNF/RAB38/SNAI1/CD19/ABHD5/ADRA2A/ASAH1/CPT1A/GFI1/GNB3/TSPO/KIT/CD74/PDGFRB/EGR1/ABCG1/TNFAIP8L3/DAB2IP/IRS2/DNAJC15/FGR/EEF1A2/DGKZ/DKK3/SORL1/ACADL/PTGS2/PIK3IP1/APOE/SPHK1/SOX9/PRKAA1	45
BP	GO:0033631	cell-cell adhesion mediated by integrin	8/1228	16/18723	2.67947e-06	6.34331e-05	4.41838e-05	CXCL13/CD3E/CCL5/ADAM9/ITGA4/FERMT3/PODXL/SKAP1	8
BP	GO:0001776	leukocyte homeostasis	19/1228	87/18723	2.78262e-06	6.5597e-05	4.5691e-05	DOCK10/ANXA1/TRAF3IP2/TNFAIP3/NCKAP1L/SLC46A2/PMAIP1/CORO1A/LAT/FAS/DOCK11/TSC22D3/CD74/JAK3/TNFSF13B/IL2RA/PIK3CD/AXL/BAX	19
BP	GO:0060541	respiratory system development	32/1228	203/18723	3.35444e-06	7.84364e-05	5.46343e-05	CHI3L1/MMP14/CTSH/PTN/LEF1/PDGFRA/LOX/FGF7/TGFB3/PDPN/HSD11B1/CRISPLD2/TNF/FOXF1/LTBP3/GPC3/WNT7B/SEC24B/PDGFRB/FSTL3/LAMA5/CTSZ/MSC/SPRY1/RCN3/FOXJ1/SOX9/RARA/BASP1/ALDH1A3/FOXA1/TGFBR2	32
BP	GO:0002763	positive regulation of myeloid leukocyte differentiation	15/1228	58/18723	3.35534e-06	7.84364e-05	5.46343e-05	TGFB1/HCLS1/LEF1/TYROBP/EVI2B/TREM2/TNF/CSF1/ZFP36L1/CD74/RUNX1/KLF10/TESC/IL34/FES	15
BP	GO:1901654	response to ketone	31/1228	194/18723	3.55582e-06	8.27766e-05	5.76574e-05	TGFB1/AKR1B1/CLDN1/TXNIP/PTN/ICAM1/CCL19/CCL21/GNG2/TGFB3/SERPINF1/EDN1/NCOA4/PTAFR/CDKN1A/TFAP4/SFRP1/BAD/GAS6/AHR/TSPO/SLIT2/AKAP8/MTAP/KLF4/GJB2/PPP1R9B/PRKAA1/PTGER4/SLIT3/GLB1	31
BP	GO:0001837	epithelial to mesenchymal transition	27/1228	157/18723	3.64211e-06	8.44335e-05	5.88114e-05	TGFB1/ACVR1/S100A4/LEF1/GLIPR2/TGFB3/SNAI2/PDPN/TMEM100/DAB2/SMAD3/SNAI1/VASN/FGFR1/SFRP1/ZNF703/EFNA1/TCOF1/AKNA/GREM1/DAB2IP/SPRY1/SOX9/AXIN2/GSC/FOXA1/TGFBR2	27
BP	GO:0051896	regulation of protein kinase B signaling	30/1228	185/18723	3.74152e-06	8.62215e-05	6.00569e-05	CHI3L1/TGFB1/HCLS1/GDF15/CCL19/CCL21/CX3CR1/TNF/SFRP5/INPP5F/TSPYL5/RAMP3/HIP1/ADAM8/FGFR1/GAS6/F3/BANK1/HBEGF/KLF4/TNFAIP8L3/EPHA2/ILK/PIK3CD/AXL/RCN3/MEIS3/PIK3R5/SEMA5A/IGF1R	30
BP	GO:0090287	regulation of cellular response to growth factor stimulus	42/1228	304/18723	3.7501e-06	8.62215e-05	6.00569e-05	TGFB1/SOSTDC1/RASL11B/CXCL13/LOX/TGFB3/SULF1/TP53/DAB2/SFRP5/SMAD3/PRKCB/RUNX2/TFAP2B/GPC1/VASN/HTRA1/HHEX/FGFR1/SFRP1/VEGFC/ZNF703/FZD4/GPC3/ITGA5/SLIT2/HTRA3/FSTL3/SEMA6A/GIPC1/CDKN2B/GREM1/DAB2IP/PMEPA1/SULF2/DOK5/ILK/DKK3/SORL1/SPRY1/ZNF423/ZEB2	42
BP	GO:1903034	regulation of response to wounding	28/1228	167/18723	4.0343e-06	9.23755e-05	6.43434e-05	PROS1/CLDN1/PTN/CLEC7A/PDGFRA/ANXA1/TNFAIP3/SERPINF2/TNF/EDN1/INPP5F/PLAT/PLAU/SERPINE1/SMAD3/ADRA2A/ALOX5/ST3GAL4/F3/LRP1/HBEGF/KLF4/ANXA2/SERPINE2/UBASH3B/ADAMTS18/APOE/SIGLEC10	28
BP	GO:0051346	negative regulation of hydrolase activity	49/1228	379/18723	4.10539e-06	9.36197e-05	6.521e-05	MMP9/TIMP1/PROS1/TNFAIP8/SPINK9/ANXA1/PLAUR/BCL2L12/SERPINF2/SERPINF1/NAIP/GZMA/SERPINA5/GNAI2/TNF/ARL2/SERPINE1/NCKAP1L/LAMP3/SERPINB12/COL6A3/GPC3/GAS6/RENBP/TFPI2/LRP1/TIMP3/RARRES1/PTX3/SPOCK1/GMIP/KLF4/MICAL1/PAPLN/ANXA2/DAB2IP/GPSM1/RPS6KA1/IFI6/SERPINE2/CD44/SORL1/PTGS2/SPRY1/NOL3/TIMP2/PPP1R9B/PPP1R1B/FURIN	49
BP	GO:0043551	regulation of phosphatidylinositol 3-kinase activity	15/1228	59/18723	4.22861e-06	9.60376e-05	6.68942e-05	TGFB1/PDGFRA/PTK2B/CCL19/CCL21/CD19/KIT/PDGFRB/KLF4/TNFAIP8L3/DAB2IP/FGR/PIK3IP1/SOCS3/PIK3R5	15
BP	GO:0001763	morphogenesis of a branching structure	31/1228	196/18723	4.42255e-06	0.000100035	6.96789e-05	MMP14/CTSH/TP63/ACVR1/LEF1/FGF7/TGM2/SULF1/EDNRA/TNF/EDN1/TACSTD2/CSF1/FOXF1/SFRP1/GPC3/SLIT2/GREM1/EPHA2/NFATC4/LAMA5/CTSZ/MYC/ILK/DCHS1/SPRY1/SOCS3/SOX9/MED1/FOXA1/TGFBR2	31
BP	GO:0030168	platelet activation	23/1228	123/18723	4.45226e-06	0.000100302	6.98643e-05	FN1/FCER1G/TXK/PDGFRA/F2RL2/PLEK/PDPN/PLA2G4A/CLIC1/CD40LG/SELP/ADRA2A/FERMT3/PTPN6/ENTPD2/LCK/SERPINE2/DGKZ/ILK/UBASH3B/ADAMTS18/AXL/APOE	23
BP	GO:0043547	positive regulation of GTPase activity	37/1228	255/18723	4.47601e-06	0.000100432	6.99548e-05	DOCK10/S1PR1/CXCL13/ICAM1/ARAP3/TBC1D2/PTK2B/CCL19/CCL21/ARHGAP25/TGM2/RGS16/CCL22/CCL5/TAX1BP3/TBC1D2B/SFRP1/TBC1D10C/RASGRP2/DOCK11/DOCK7/BCAR3/ARHGAP29/S100A10/DVL3/SH3BP1/ARHGAP45/GMIP/EPHA2/TBC1D13/PREX1/RABGAP1L/CORO1C/TBC1D9/FOXJ1/ABR/PLXNB1	37
BP	GO:0002367	cytokine production involved in immune response	20/1228	98/18723	4.65006e-06	0.000103389	7.20149e-05	SLAMF1/TGFB1/CD96/BCL6/LAPTM5/CLEC7A/TGFB3/SCIMP/TREM1/TNF/BTK/SASH3/HK1/TRAF2/KIT/SPON2/CD74/JAK3/TNFRSF1B/TBX21	20
BP	GO:0036336	dendritic cell migration	11/1228	33/18723	4.66603e-06	0.000103389	7.20149e-05	SLAMF1/CCL19/CCL21/CCL5/CCR5/ALOX5/GAS6/EPS8/TRPM2/SPI1/ASB2	11
BP	GO:0050901	leukocyte tethering or rolling	11/1228	33/18723	4.66603e-06	0.000103389	7.20149e-05	CCL21/CX3CR1/TNF/SPN/ITGA4/SELP/PTAFR/CXCL12/ST3GAL4/ITGB7/SELL	11
BP	GO:0002312	B cell activation involved in immune response	18/1228	82/18723	4.68184e-06	0.000103389	7.20149e-05	TGFB1/BCL6/DOCK10/STAT6/MFNG/PTK2B/BATF/PTPRC/CD180/CD40LG/CD19/LFNG/DOCK11/LGALS1/SPI1/POU2AF1/BCL3/TBX21	18
BP	GO:0034341	response to interferon-gamma	25/1228	141/18723	4.71651e-06	0.000103745	7.22624e-05	CLDN1/KYNU/TXK/ICAM1/CCL19/CCL21/IFNGR1/MRC1/CCL22/CCL5/TP53/AIF1/EDN1/CIITA/CDC42EP2/WAS/ZYX/CD74/RAB20/VIM/SIRPA/HCK/NMI/CXCL16/MED1	25
BP	GO:0050678	regulation of epithelial cell proliferation	49/1228	381/18723	4.75876e-06	0.000104263	7.26238e-05	TGFB1/CLDN1/TP63/NRP2/PTN/IFT74/TNFAIP3/FGF7/VASH1/SNAI2/SULF1/OSR2/DUSP10/ZFP36/SERPINF1/HYAL1/TNF/SMAD3/ZFP36L1/ITGA4/GATA2/NLRC3/HTRA1/FGFR1/SFRP1/VEGFC/ZNF703/CXCL12/ALOX5/VEGFB/BAD/GPC3/F3/CDKN2B/ATOH8/DAB2IP/SULF2/MYC/GPBAR1/PIK3CD/FZD7/CDH3/APOE/BAX/SOX9/TNFSF12/MED1/SEMA5A/NR2F2	49
BP	GO:0048762	mesenchymal cell differentiation	35/1228	236/18723	4.90826e-06	0.000107119	7.46129e-05	TGFB1/ACVR1/NRP2/FN1/S100A4/LEF1/GLIPR2/TGFB3/SNAI2/PDPN/EDNRA/TMEM100/DAB2/EDN1/SMAD3/SNAI1/VASN/FGFR1/SFRP1/ZNF703/EFNA1/TCOF1/SEMA6A/AKNA/GREM1/DAB2IP/LAMA5/CORO1C/SPRY1/SOX9/AXIN2/SEMA5A/GSC/FOXA1/TGFBR2	35
BP	GO:0031098	stress-activated protein kinase signaling cascade	36/1228	247/18723	5.41025e-06	0.000117615	8.19238e-05	SLAMF1/LTBR/AKR1B1/GADD45A/CLEC7A/CRACR2A/PTK2B/CCL19/CCL21/DUSP10/ZFP36/SERPINF2/SCIMP/MAP2K6/TREM2/TNF/PTPN22/SMAD3/ZFP36L1/NCF1/FAS/SFRP1/ARHGEF6/TRAF2/WNT7B/SASH1/EDAR/DAB2IP/TNFRSF19/SIRPA/MYC/SPI1/FZD7/SPHK1/PTGER4/IGF1R	36
BP	GO:0033209	tumor necrosis factor-mediated signaling pathway	20/1228	99/18723	5.4727e-06	0.000118054	8.22295e-05	TMSB4X/LAPTM5/KRT8/KRT18/PTK2B/TRAF3IP2/TNFAIP3/TP53/TNF/FAS/TRAF2/GAS6/TNFRSF13C/TNFSF13B/TNFRSF19/ILK/TNFRSF1B/TRADD/NOL3/SPHK1	20
BP	GO:0110149	NA	20/1228	99/18723	5.4727e-06	0.000118054	8.22295e-05	TGFB1/ACVR1/S1PR1/PTN/PTK2B/TGFB3/OSR2/ISG15/SRGN/SMAD3/ALOX5/IFITM5/LTBP3/GAS6/MGP/ENPP1/GREM1/FBLN7/TMEM119/SOX9	20
BP	GO:0033002	muscle cell proliferation	36/1228	248/18723	5.93808e-06	0.0001276	8.88789e-05	TGFB1/IGFBP3/MMP9/AKR1B1/APOD/XRCC5/S1PR1/TNFAIP3/TGFB3/TGM2/MMP2/CCL5/SERPINF2/ITGA2/GNAI2/AIF1/TNF/EDN1/PTAFR/CDKN1A/EFEMP2/VIPR2/PDGFRB/HBEGF/HPGD/KLF4/RUNX1/SOD2/ABCC4/ILK/PTGS2/SMAD1/APOE/TBX2/VGLL4/TGFBR2	36
BP	GO:1902624	positive regulation of neutrophil migration	10/1228	28/18723	6.26093e-06	0.000134022	9.33521e-05	RAC2/CCL19/CCL21/EDN1/NCKAP1L/ADAM8/XG/CD99/CD74/CAMK1D	10
BP	GO:0043281	regulation of cysteine-type endopeptidase activity involved in apoptotic process	32/1228	209/18723	6.28957e-06	0.000134122	9.34213e-05	CTSH/MMP9/TP63/LAPTM5/CLEC7A/TNFAIP8/PLAUR/BCL2L12/NAIP/TNF/LAMP3/SMAD3/PMAIP1/HIP1/TFAP4/FAS/BAD/CTSD/GAS6/F3/ACER2/ANP32B/KLF4/MICAL1/RPS6KA1/IFI6/LCK/MYC/CD44/PTGS2/NOL3/BAX	32
BP	GO:0110148	NA	28/1228	171/18723	6.44549e-06	0.000136924	9.53731e-05	TGFB1/ACVR1/S1PR1/PTN/LOX/PTK2B/TGFB3/OSR2/ISG15/SRGN/SMAD3/ALOX5/IFITM5/LTBP3/GPC3/GAS6/MGP/SBNO2/ENPP1/GREM1/FBLN7/FGR/KLF10/PTGS2/TMEM119/SOX9/AXIN2/PTH1R	28
BP	GO:0030851	granulocyte differentiation	11/1228	34/18723	6.49033e-06	0.000137179	9.55508e-05	HCLS1/LEF1/EVI2B/C1QC/GATA2/INPP5D/RUNX1/SPI1/TESC/CBFA2T3/RARA	11
BP	GO:0045444	fat cell differentiation	34/1228	229/18723	6.5066e-06	0.000137179	9.55508e-05	RARRES2/TGFB1/ARL4A/STEAP4/PDGFRA/PLAC8/DUSP10/ZFP36/TNF/ARID5B/ADIRF/CCDC71L/SMAD3/ZFP36L1/ZFP36L2/GATA2/ATAT1/TFAP2B/SFRP1/ALOX5/EGR2/ZNF385A/GNB3/CDS1/KLF4/ENPP1/MEDAG/MAFB/PTGS2/MMP11/INHBB/SIRT2/MED1/METRNL	34
BP	GO:0051403	stress-activated MAPK cascade	35/1228	239/18723	6.53362e-06	0.00013723	9.55868e-05	SLAMF1/LTBR/GADD45A/CLEC7A/CRACR2A/PTK2B/CCL19/CCL21/DUSP10/ZFP36/SERPINF2/SCIMP/MAP2K6/TREM2/TNF/PTPN22/SMAD3/ZFP36L1/NCF1/FAS/SFRP1/ARHGEF6/TRAF2/WNT7B/SASH1/EDAR/DAB2IP/TNFRSF19/SIRPA/MYC/SPI1/FZD7/SPHK1/PTGER4/IGF1R	35
BP	GO:2001235	positive regulation of apoptotic signaling pathway	23/1228	126/18723	6.78182e-06	0.00014191	9.88463e-05	PDIA3/CTSH/LTBR/TP63/PTPRC/TP53/TNF/PMAIP1/FAS/SFRP1/BAD/CTSC/SRPX/TRAF2/PEA15/TIMP3/RNF183/NFATC4/DAB2IP/LCK/INHBB/BAX/TNFSF12	23
BP	GO:0032640	tumor necrosis factor production	29/1228	181/18723	6.87856e-06	0.000142864	9.9511e-05	SLAMF1/CLEC7A/CD14/HAVCR2/CCL19/IFNGR1/TNFAIP3/PTPRC/TYROBP/ZFP36/CX3CR1/TREM2/SPN/SASH3/PTPN22/PTAFR/NLRC3/FRMD8/GAS6/PTPN6/TSPO/SPON2/AKAP8/AKAP12/NFATC4/SIRPA/AXL/BCL3/RARA	29
BP	GO:0032680	regulation of tumor necrosis factor production	29/1228	181/18723	6.87856e-06	0.000142864	9.9511e-05	SLAMF1/CLEC7A/CD14/HAVCR2/CCL19/IFNGR1/TNFAIP3/PTPRC/TYROBP/ZFP36/CX3CR1/TREM2/SPN/SASH3/PTPN22/PTAFR/NLRC3/FRMD8/GAS6/PTPN6/TSPO/SPON2/AKAP8/AKAP12/NFATC4/SIRPA/AXL/BCL3/RARA	29
BP	GO:0007249	I-kappaB kinase/NF-kappaB signaling	39/1228	281/18723	7.38461e-06	0.000152807	0.000106436	LTBR/S100B/S100A13/S100A4/WLS/CLEC7A/CLEC6A/CCL19/CCL21/TRAF3IP2/TNFAIP3/RNF31/TGM2/CX3CR1/TREM2/TNF/BTK/PIM2/PRKCB/TLR8/CARD11/NLRC3/IFIT5/TRAF2/LGALS1/CD74/CXXC5/SLC44A2/SQSTM1/TRIM14/FYN/EDAR/DAB2IP/NEK6/TNFRSF19/SIRPA/TRADD/BCL3/MAP3K14	39
BP	GO:0072073	kidney epithelium development	24/1228	136/18723	7.89444e-06	0.000162754	0.000113365	KLHL3/TACSTD2/SMAD3/TFAP2B/SFRP1/GPC3/PODXL/WNT7B/SLIT2/PROM1/KANK2/AHI1/GREM1/LAMA5/SDC4/MYC/ILK/DCHS1/SPRY1/SMAD1/FOXJ1/SOX9/RARA/BASP1	24
BP	GO:1902622	regulation of neutrophil migration	12/1228	41/18723	7.98808e-06	0.000164079	0.000114288	RAC2/CCL19/CCL21/EDN1/NCKAP1L/ADAM8/XG/CD99/SLIT2/BST1/CD74/CAMK1D	12
BP	GO:0060070	canonical Wnt signaling pathway	41/1228	303/18723	8.17505e-06	0.00016577	0.000115466	IGFBP4/TGFB1/WLS/SOSTDC1/LEF1/SNAI2/PLEKHA4/DAB2/MITF/SFRP5/SMAD3/HHEX/SFRP1/ZNF703/BICC1/FZD4/FRMD8/MED12/GPC3/DVL3/FZD1/WNT7B/EGR1/TCF7/WNK2/KLF4/GREM1/DAB2IP/SULF2/LRP4/ILK/DKK3/FZD7/CDH3/ZEB2/APOE/SOX9/AXIN2/FZD2/SEMA5A/MESP1	41
BP	GO:0002698	negative regulation of immune effector process	21/1228	110/18723	8.18459e-06	0.00016577	0.000115466	SLAMF1/TGFB1/CD96/BCL6/FGL2/HAVCR2/ANXA1/TGFB3/DUSP10/PTPRC/IL7R/CX3CR1/TNF/NCKAP1L/FOXF1/AHR/PTPN6/JAK3/SPI1/FOXJ1/TBX21	21
BP	GO:0032623	interleukin-2 production	15/1228	62/18723	8.18911e-06	0.00016577	0.000115466	LAPTM5/CLEC7A/HAVCR2/ANXA1/TNFAIP3/CD3E/PTPRC/ZFP36/SASH3/CD83/CARD11/TRAF2/HOMER3/RUNX1/TBX21	15
BP	GO:0032663	regulation of interleukin-2 production	15/1228	62/18723	8.18911e-06	0.00016577	0.000115466	LAPTM5/CLEC7A/HAVCR2/ANXA1/TNFAIP3/CD3E/PTPRC/ZFP36/SASH3/CD83/CARD11/TRAF2/HOMER3/RUNX1/TBX21	15
BP	GO:0009615	response to virus	47/1228	367/18723	8.28449e-06	0.000167096	0.000116389	FGL2/KCNJ8/CCL19/TRAF3IP2/IFNGR1/TNFAIP3/IRF9/ISG15/PTPRC/CCL22/CCL5/ISG20/HYAL1/TNF/IFIT2/IRF2/PRF1/WDFY4/PIM2/PQBP1/PTPN22/SMAD3/TLR8/ZNF175/PMAIP1/ITGAX/IFIT5/IFIT3/HTRA1/CXCL12/IFNAR2/SPON2/MX2/MX1/BNIP3L/FGR/IFI6/SAMHD1/POU2AF1/BATF3/ZDHHC1/BCL3/BAX/NMI/UNC13D/TBX21/MAP3K14	47
BP	GO:0010466	negative regulation of peptidase activity	37/1228	262/18723	8.42683e-06	0.000169355	0.000117963	MMP9/TIMP1/PROS1/TNFAIP8/SPINK9/PLAUR/BCL2L12/SERPINF2/SERPINF1/NAIP/SERPINA5/TNF/SERPINE1/LAMP3/SERPINB12/COL6A3/GPC3/GAS6/RENBP/TFPI2/LRP1/TIMP3/RARRES1/SPOCK1/KLF4/MICAL1/PAPLN/ANXA2/RPS6KA1/IFI6/SERPINE2/CD44/SORL1/PTGS2/NOL3/TIMP2/FURIN	37
BP	GO:0010594	regulation of endothelial cell migration	34/1228	232/18723	8.66636e-06	0.000172979	0.000120487	TMSB4X/TGFB1/NRP2/GADD45A/PTN/CXCL13/ANXA1/PTK2B/RHOJ/VASH1/SERPINF1/LGMN/TNF/EDN1/ANGPT2/GATA2/EMP2/FGFR1/VEGFC/SRPX2/EFNA1/SH3BP1/SLIT2/KLF4/SASH1/EPHA2/ATOH8/DAB2IP/PIK3CD/PTGS2/APOE/SEMA5A/NR2F2/DNAJA4	34
BP	GO:0043303	mast cell degranulation	13/1228	48/18723	8.6691e-06	0.000172979	0.000120487	S100A13/RAC2/MILR1/BTK/FOXF1/LAT2/GATA2/LAT/KIT/FGR/PIK3CD/UNC13D/FES	13
BP	GO:0007266	Rho protein signal transduction	24/1228	137/18723	8.98562e-06	0.000178657	0.000124442	BCL6/ABCA1/F2RL2/RHOJ/PDPN/TAX1BP3/KCTD13/ARHGEF3/FLOT1/GPR35/LIMK1/ADRA2A/RHOD/CDC42EP2/WAS/ARHGAP4/ARHGAP29/EPS8/ARHGDIB/PDGFRB/KANK2/RHOV/CDC42EP3/APOE	24
BP	GO:0070482	response to oxygen levels	45/1228	347/18723	9.27062e-06	0.00018367	0.000127934	MMP14/UCP2/S100B/PTN/ICAM1/PTK2B/TGFB3/PDPN/EDNRA/MMP2/TP53/STC2/ITGA2/TREM2/EDN1/PLAT/PLAU/SMAD3/ZFP36L1/ANGPT2/SLC29A1/CDKN1A/PMAIP1/VASN/FAS/ADAM8/SFRP1/VEGFC/CXCL12/VEGFB/BAD/LMNA/PDGFRB/EGR1/BNIP3L/SOD2/PTGIS/MYC/PTGS2/CBFA2T3/NOL3/SIRT2/CYGB/PRKAA1/TGFBR2	45
BP	GO:0097305	response to alcohol	36/1228	253/18723	9.36327e-06	0.00018485	0.000128756	TGFB1/CLDN1/ICAM1/CD14/PTK2B/CCL19/CCL21/ABCA1/GNG2/CCR5/OXCT1/EHMT2/CDKN1A/SFRP1/BAD/CPT1A/CLDN5/AHR/EPS8/TSPO/SLIT2/USP46/AKAP8/HPGD/KLF4/FYN/SOD2/SPI1/GRAMD1A/PPP1R9B/RARA/PRKAA1/PTGER4/SLIT3/GLB1/TGFBR2	36
BP	GO:0007265	Ras protein signal transduction	44/1228	337/18723	9.77346e-06	0.000192269	0.000133923	BCL6/RAC2/CYTH4/ABCA1/F2RL2/RHOJ/PDPN/RAB4B/TAX1BP3/TP53/AIF1/KCTD13/CSF1/ARHGEF3/FLOT1/CDKN1A/GPR35/LAT/LIMK1/ADRA2A/RASGRP2/RHOD/CDC42EP2/WAS/ARHGAP4/ARHGAP29/ELMO1/EPS8/ARHGDIB/SH3BP1/PDGFRB/DOK3/KANK2/RASAL3/SQSTM1/DENND4A/RHOV/CDC42EP3/DAB2IP/USP28/SPRY1/RALB/APOE/TIMP2	44
BP	GO:0002704	negative regulation of leukocyte mediated immunity	15/1228	63/18723	1.01026e-05	0.000197353	0.000137465	SLAMF1/CD96/BCL6/HAVCR2/PTPRC/IL7R/CX3CR1/NCKAP1L/FOXF1/AHR/PTPN6/JAK3/SPI1/FOXJ1/TBX21	15
BP	GO:0050854	regulation of antigen receptor-mediated signaling pathway	15/1228	63/18723	1.01026e-05	0.000197353	0.000137465	LAPTM5/TESPA1/PTPRC/SH2D1A/PTPN22/NFAM1/CD19/PRKCB/CARD11/PVRIG/PTPN6/UBASH3A/LCK/DGKZ/CMTM3	15
BP	GO:0051017	actin filament bundle assembly	26/1228	157/18723	1.10696e-05	0.000215259	0.000149937	S1PR1/PTK2B/TGFB3/PLEK/SERPINF2/AIF1/KCTD13/TACSTD2/SMAD3/FSCN1/LIMK1/SFRP1/RHOD/WAS/S100A10/ZYX/CALD1/EPS8/PDXP/DPYSL3/MICAL1/FAM171A1/SDC4/USH1C/FHOD1/PTGER4	26
BP	GO:0002279	mast cell activation involved in immune response	13/1228	49/18723	1.10962e-05	0.000215259	0.000149937	S100A13/RAC2/MILR1/BTK/FOXF1/LAT2/GATA2/LAT/KIT/FGR/PIK3CD/UNC13D/FES	13
BP	GO:0001666	response to hypoxia	41/1228	307/18723	1.12694e-05	0.000217465	0.000151474	MMP14/UCP2/S100B/PTN/ICAM1/PTK2B/TGFB3/EDNRA/MMP2/TP53/STC2/ITGA2/TREM2/EDN1/PLAT/PLAU/SMAD3/ZFP36L1/ANGPT2/SLC29A1/PMAIP1/VASN/ADAM8/SFRP1/VEGFC/CXCL12/VEGFB/BAD/LMNA/EGR1/BNIP3L/SOD2/PTGIS/MYC/PTGS2/CBFA2T3/NOL3/SIRT2/CYGB/PRKAA1/TGFBR2	41
BP	GO:0010634	positive regulation of epithelial cell migration	28/1228	176/18723	1.12878e-05	0.000217465	0.000151474	TMSB4X/TGFB1/CTSH/MMP9/NRP2/ANXA1/GLIPR2/PTK2B/FGF7/RHOJ/ITGA2/LGMN/HYAL1/EDN1/ADAM9/GATA2/FGFR1/VEGFC/SRPX2/HBEGF/SASH1/ATOH8/ENPP2/PIK3CD/PTGS2/SOX9/SEMA5A/TGFBR2	28
BP	GO:0007568	aging	44/1228	339/18723	1.13626e-05	0.000218154	0.000151954	UCP2/TIMP1/APOD/CLDN1/TP63/BCL6/KYNU/C1QA/DDC/NUAK1/ICAM1/TGFB3/VASH1/MMP7/SERPINF1/CD68/TP53/MAP2K6/BCL2A1/EDN1/SERPINE1/CDKN1A/INPP5D/NFKB2/CTSC/LMNA/LRP1/TSPO/PDGFRB/CDKN2B/SOD2/NEK6/GJB2/SPI1/ILK/TNFRSF1B/PTGS2/TIMP2/TBX2/MNT/PPP1R9B/ABI3/PTH1R/TGFBR2	44
BP	GO:2000116	regulation of cysteine-type endopeptidase activity	34/1228	235/18723	1.14672e-05	0.000219409	0.000152828	CTSH/MMP9/TP63/LAPTM5/CLEC7A/TNFAIP8/PLAUR/BCL2L12/NAIP/LGMN/TNF/LAMP3/SMAD3/PMAIP1/HIP1/TFAP4/FAS/BAD/CTSD/GAS6/F3/ACER2/ANP32B/KLF4/FYN/MICAL1/RPS6KA1/IFI6/LCK/MYC/CD44/PTGS2/NOL3/BAX	34
BP	GO:0043123	positive regulation of I-kappaB kinase/NF-kappaB signaling	29/1228	186/18723	1.18082e-05	0.000224847	0.000156615	LTBR/S100B/S100A13/S100A4/WLS/CLEC7A/CLEC6A/CCL19/CCL21/TRAF3IP2/RNF31/TGM2/TNF/PIM2/PRKCB/CARD11/IFIT5/TRAF2/LGALS1/CD74/CXXC5/SLC44A2/TRIM14/FYN/EDAR/NEK6/TNFRSF19/TRADD/MAP3K14	29
BP	GO:0061458	reproductive system development	52/1228	427/18723	1.18631e-05	0.000224847	0.000156615	MMP14/TP63/PTN/KRT8/LEF1/PDGFRA/JUNB/ICAM1/ANXA1/VASH1/SULF1/DHX37/SERPINF1/STC2/SERPINA5/ARID5B/NCOA4/ARID4A/ZFP36L1/SNAI1/GATA2/MDFI/HTRA1/SFRP1/SGPL1/FZD4/CRIP1/PTX3/PTPN6/WNT7B/KIT/SLIT2/PDGFRB/FSTL3/CTSB/GJB2/SERPINE2/PTGS2/TESC/INHBB/AXL/BAX/SOCS3/SOX9/PPP1R9B/MED1/RARA/PLCD3/SLIT3/BASP1/NR2F2/FOXA1	52
BP	GO:0046634	regulation of alpha-beta T cell activation	20/1228	104/18723	1.19124e-05	0.000224847	0.000156615	BCL6/EBI3/CD274/ANXA1/CCL19/CD3E/PTPRC/SASH3/PTPN22/NCKAP1L/CRTAM/NFKBID/ZNF683/CD83/RASAL3/JAK3/RUNX1/TBX21/RARA/TGFBR2	20
BP	GO:0048661	positive regulation of smooth muscle cell proliferation	20/1228	104/18723	1.19124e-05	0.000224847	0.000156615	TGFB1/MMP9/AKR1B1/S1PR1/TGM2/MMP2/CCL5/SERPINF2/ITGA2/GNAI2/AIF1/TNF/EDN1/PTAFR/PDGFRB/HBEGF/HPGD/ABCC4/PTGS2/TGFBR2	20
BP	GO:0043254	regulation of protein complex assembly	52/1228	428/18723	1.26662e-05	0.000237794	0.000165633	TMSB4X/TGFB1/HCLS1/CLEC7A/CXCL13/ICAM1/FCHSD1/PTK2B/CCL21/ABCA1/PLEK/ISG15/COTL1/TP53/TREM2/TNF/ARL2/NCKAP1L/SELP/FNIP2/ADD3/ATAT1/CORO1A/FSCN1/NLRC3/CDC42EP2/TRABD2B/TRAF2/WAS/SCIN/EPS8/SLIT2/DBN1/CAPZB/CDC42EP3/TMSB10/DAB2IP/WASF3/DNAJC15/PMEPA1/HCK/PREX1/SORL1/RALB/APOE/BAX/SOX9/SKAP1/PTGER4/TPPP/FES/STX1A	52
BP	GO:0070229	negative regulation of lymphocyte apoptotic process	10/1228	30/18723	1.27034e-05	0.000237794	0.000165633	BCL6/CCL5/IL7R/SLC46A2/TSC22D3/EFNA1/CD74/JAK3/IRS2/NOC2L	10
BP	GO:0002718	regulation of cytokine production involved in immune response	19/1228	96/18723	1.2726e-05	0.000237794	0.000165633	SLAMF1/TGFB1/CD96/BCL6/LAPTM5/CLEC7A/TGFB3/SCIMP/TNF/BTK/SASH3/HK1/TRAF2/KIT/SPON2/CD74/JAK3/TNFRSF1B/TBX21	19
BP	GO:0070099	regulation of chemokine-mediated signaling pathway	6/1228	10/18723	1.31322e-05	0.000244565	0.000170349	CCL5/TREM2/EDN1/SLIT2/PADI2/SLIT3	6
BP	GO:0032729	positive regulation of interferon-gamma production	16/1228	72/18723	1.32624e-05	0.00024617	0.000171468	SLAMF1/CD244/CLEC7A/TXK/EBI3/CD14/HAVCR2/CD3E/ISG15/TNF/SASH3/PTPN22/CRTAM/TLR8/CD276/BCL3	16
BP	GO:0071496	cellular response to external stimulus	42/1228	320/18723	1.35913e-05	0.000251439	0.000175137	UCP2/LTBR/GADD45A/PDK4/PTN/AOC1/NUAK1/ICAM1/SNAI2/MMP7/FOLR2/PTPRC/CD68/TP53/ITGA2/AIF1/ITGA4/TLR8/EHMT2/CDKN1A/PMAIP1/FAS/BAG3/SFRP1/BAD/GAS6/KANK2/CDKN2B/DNAJC15/KCNB1/KLF10/PTGS2/INHBB/RALB/AXL/SOX9/PPP1R9B/MED1/MAP3K14/PRKAA1/PTGER4/FES	42
BP	GO:0110053	regulation of actin filament organization	38/1228	278/18723	1.37117e-05	0.00025227	0.000175717	TMSB4X/HCLS1/S1PR1/ICAM1/FCHSD1/PTK2B/CCL21/TGFB3/PLEK/COTL1/SERPINF2/TACSTD2/NCKAP1L/SMAD3/ADD3/CORO1A/LIMK1/SFRP1/CXCL12/CDC42EP2/WAS/S100A10/SCIN/EPS8/SH3BP1/PDXP/SLIT2/DBN1/CAPZB/CDC42EP3/TMSB10/WASF3/HCK/SDC4/PREX1/FHOD1/PTGER4/SEMA5A	38
BP	GO:0006509	membrane protein ectodomain proteolysis	12/1228	43/18723	1.37265e-05	0.00025227	0.000175717	TIMP1/MMP7/TNF/ADAM9/ADAM8/ADRA2A/TIMP3/PTPN3/TNFRSF1B/APOE/TIMP2/FURIN	12
BP	GO:0001961	positive regulation of cytokine-mediated signaling pathway	13/1228	50/18723	1.41014e-05	0.00025831	0.000179924	LAPTM5/TXK/TREM2/EDN1/CSF1/TRAF2/GAS6/GFI1/CD74/AGPAT2/IL7/AXL/MED1	13
BP	GO:0031346	positive regulation of cell projection organization	45/1228	353/18723	1.44076e-05	0.000263056	0.00018323	FN1/PTN/RAC2/PTK2B/CCL19/CCL21/TGFB3/SERPINF1/ITGA2/PLXNC1/FSCN1/LIMK1/CXCL12/FZD4/EHD1/CDC42EP2/DOCK11/CRABP2/DVL3/FZD1/LRP1/EPS8/KIT/SLIT2/DPYSL3/PALM/DBN1/FYN/CDC42EP3/RHOQ/DAB2IP/DZIP1/CAMK1D/ENPP2/APBB1/ILK/CORO1C/APOE/SCN1B/DLG4/TRPV2/SEMA5A/ENC1/FES/PLXNB1	45
BP	GO:0001959	regulation of cytokine-mediated signaling pathway	25/1228	150/18723	1.44867e-05	0.000263638	0.000183635	LAPTM5/TXK/TNFAIP3/IL1RN/ISG15/PTPRC/CCL5/TREM2/EDN1/CSF1/TRAF2/GAS6/GFI1/PTPN6/SLIT2/CD74/PADI2/AGPAT2/SAMHD1/IL7/NOL3/AXL/SPHK1/MED1/SLIT3	25
BP	GO:0002286	T cell activation involved in immune response	21/1228	114/18723	1.45485e-05	0.000263904	0.00018382	BCL6/FCER1G/FGL2/STAT6/CRACR2A/LEF1/ICAM1/HAVCR2/ANXA1/CCL19/BATF/TP53/SPN/NCKAP1L/NFKBID/CD74/JAK3/BCL3/TBX21/RARA/PTGER4	21
BP	GO:0070167	regulation of biomineral tissue development	19/1228	97/18723	1.4866e-05	0.000268028	0.000186693	TGFB1/ACVR1/S1PR1/PTN/PTK2B/TGFB3/OSR2/ISG15/SRGN/SMAD3/ALOX5/IFITM5/LTBP3/GAS6/MGP/ENPP1/GREM1/TMEM119/SOX9	19
BP	GO:0031214	biomineral tissue development	27/1228	169/18723	1.48718e-05	0.000268028	0.000186693	TGFB1/ACVR1/S1PR1/PTN/LOX/PTK2B/TGFB3/OSR2/ISG15/SRGN/SMAD3/ALOX5/IFITM5/LTBP3/GPC3/GAS6/MGP/SBNO2/ENPP1/GREM1/FGR/KLF10/PTGS2/TMEM119/SOX9/AXIN2/PTH1R	27
BP	GO:0007179	transforming growth factor beta receptor signaling pathway	30/1228	198/18723	1.49335e-05	0.000268275	0.000186865	TGFB1/ACVR1/RASL11B/GDF15/LOX/TGFB3/TP53/DAB2/ADAM9/SMAD3/VASN/HTRA1/ZNF703/LTBP3/CLDN5/ZYX/HTRA3/GIPC1/HPGD/CDKN2B/LTBP2/SMAD9/PMEPA1/SPI1/DKK3/SPRY1/SMAD1/ZEB2/FURIN/TGFBR2	30
BP	GO:0045453	bone resorption	15/1228	65/18723	1.51556e-05	0.000271393	0.000189037	CTSK/S1PR1/PDK4/RAC2/PTK2B/TNFAIP3/TPP1/GPR137B/INPP5D/ADAM8/LTBP3/IL7/UBASH3B/TMEM119/PTH1R	15
BP	GO:0002062	chondrocyte differentiation	20/1228	106/18723	1.59999e-05	0.000284687	0.000198296	TGFB1/SNAI2/SULF1/OSR2/SMAD3/RUNX2/LTBP3/SCIN/RUNX1/COL27A1/GREM1/EFEMP1/SULF2/TSKU/MAF/SOX9/AXIN2/ADAMTS7/PTH1R/TGFBR2	20
BP	GO:0019882	antigen processing and presentation	20/1228	106/18723	1.59999e-05	0.000284687	0.000198296	CTSH/FCER1G/CD1E/CTSS/FGL2/ICAM1/CD209/CCL19/CCL21/CTSL/CD68/LGMN/TREM2/WDFY4/CTSD/WAS/CD74/RFTN1/RAB32/RAB34	20
BP	GO:0048754	branching morphogenesis of an epithelial tube	25/1228	151/18723	1.62984e-05	0.000288162	0.000200717	MMP14/CTSH/ACVR1/LEF1/EDNRA/TNF/EDN1/TACSTD2/CSF1/FOXF1/GPC3/SLIT2/GREM1/EPHA2/NFATC4/LAMA5/CTSZ/MYC/ILK/DCHS1/SPRY1/SOX9/MED1/FOXA1/TGFBR2	25
BP	GO:2001236	regulation of extrinsic apoptotic signaling pathway	25/1228	151/18723	1.62984e-05	0.000288162	0.000200717	PDIA3/LTBR/ACVR1/BCL2L14/ICAM1/TNFAIP3/SNAI2/PTPRC/BCL2L12/TNF/SERPINE1/PMAIP1/ITPRIP/FGFR1/SFRP1/SRPX/TRAF2/LMNA/PEA15/TIMP3/FYN/IFI6/IL7/NOL3/TNFSF12	25
BP	GO:0031579	membrane raft organization	9/1228	25/18723	1.70579e-05	0.00030064	0.000209408	PTPRC/FLOT1/EMP2/S100A10/RFTN1/ANXA2/MAL/FLOT2/DOCK2	9
BP	GO:0051056	regulation of small GTPase mediated signal transduction	40/1228	302/18723	1.74588e-05	0.000306737	0.000213655	BCL6/ARHGAP15/CYTH4/ABCA1/F2RL2/ARHGAP25/TGM2/KCTD13/CSF1/ARHGEF3/FLOT1/GPR35/RHOD/ARHGAP4/ARHGAP29/ARHGAP30/ARHGAP9/EPS8/ARHGDIB/PLEKHG6/SH3BP1/SLIT2/PDGFRB/ARHGAP45/KANK2/RASAL3/GMIP/SQSTM1/TAGAP/DENND4A/ARHGEF40/DAB2IP/PREX1/ARHGEF17/SPRY1/APOE/TIMP2/ABR/ARHGAP23/DOCK2	40
BP	GO:0061572	actin filament bundle organization	26/1228	161/18723	1.75152e-05	0.000306763	0.000213673	S1PR1/PTK2B/TGFB3/PLEK/SERPINF2/AIF1/KCTD13/TACSTD2/SMAD3/FSCN1/LIMK1/SFRP1/RHOD/WAS/S100A10/ZYX/CALD1/EPS8/PDXP/DPYSL3/MICAL1/FAM171A1/SDC4/USH1C/FHOD1/PTGER4	26
BP	GO:0032964	collagen biosynthetic process	13/1228	51/18723	1.77983e-05	0.000310747	0.000216448	TGFB1/TGFB3/SERPINF2/ITGA2/TRAM2/CIITA/PDGFRB/RUNX1/LARP6/VIM/RCN3/CYGB/P3H4	13
BP	GO:0097581	lamellipodium organization	18/1228	90/18723	1.83952e-05	0.000320167	0.00022301	S1PR1/RAC2/PDPN/FSCN1/RHOD/ARHGEF6/WAS/PLEKHO1/PARVB/KIT/SLIT2/EPHA2/CAPZB/WASF3/ENPP2/CD44/CORO1C/ABI3	18
BP	GO:0038061	NIK/NF-kappaB signaling	24/1228	143/18723	1.89378e-05	0.000328589	0.000228876	CHI3L1/TMSB4X/LAPTM5/CD14/HAVCR2/CCL19/TREM2/TNF/EDN1/PTPN22/NLRC3/NFKB2/TRAF2/SASH1/GREM1/EDAR/SPI1/ILK/TRADD/NOL3/BCL3/NMI/SPHK1/MAP3K14	24
BP	GO:0061041	regulation of wound healing	23/1228	134/18723	1.93315e-05	0.000334381	0.00023291	PROS1/CLDN1/CLEC7A/PDGFRA/ANXA1/TNFAIP3/SERPINF2/TNF/EDN1/PLAT/PLAU/SERPINE1/SMAD3/ADRA2A/ALOX5/ST3GAL4/F3/HBEGF/ANXA2/SERPINE2/UBASH3B/ADAMTS18/APOE	23
BP	GO:2000027	regulation of animal organ morphogenesis	22/1228	125/18723	1.94302e-05	0.000335052	0.000233377	FGF7/GPC6/SULF1/PLEKHA4/DAB2/TNF/EDN1/TACSTD2/CSF1/RUNX2/SFRP1/MED12/GPC3/DVL3/SEC24B/AHI1/GREM1/FZD7/SPRY1/SOX9/FZD2/MESP1	22
BP	GO:0060759	regulation of response to cytokine stimulus	26/1228	162/18723	1.95856e-05	0.000336691	0.00023452	LAPTM5/TXK/TNFAIP3/IL1RN/ISG15/PTPRC/CCL5/TREM2/EDN1/CSF1/TRAF2/GAS6/GFI1/PTPN6/SLIT2/CD74/KLF4/PADI2/AGPAT2/SAMHD1/IL7/NOL3/AXL/SPHK1/MED1/SLIT3	26
BP	GO:0048608	reproductive structure development	51/1228	424/18723	2.01236e-05	0.00034406	0.000239652	MMP14/TP63/PTN/KRT8/LEF1/PDGFRA/JUNB/ICAM1/ANXA1/VASH1/SULF1/DHX37/SERPINF1/STC2/SERPINA5/ARID5B/NCOA4/ARID4A/ZFP36L1/SNAI1/GATA2/MDFI/HTRA1/SFRP1/SGPL1/FZD4/CRIP1/PTX3/PTPN6/WNT7B/KIT/SLIT2/PDGFRB/FSTL3/CTSB/GJB2/SERPINE2/PTGS2/TESC/INHBB/AXL/BAX/SOCS3/SOX9/MED1/RARA/PLCD3/SLIT3/BASP1/NR2F2/FOXA1	51
BP	GO:0010717	regulation of epithelial to mesenchymal transition	19/1228	99/18723	2.01374e-05	0.00034406	0.000239652	TGFB1/ACVR1/LEF1/GLIPR2/TGFB3/PDPN/DAB2/SMAD3/SNAI1/VASN/SFRP1/ZNF703/EFNA1/GREM1/DAB2IP/SPRY1/AXIN2/FOXA1/TGFBR2	19
BP	GO:0023035	CD40 signaling pathway	7/1228	15/18723	2.06933e-05	0.00035248	0.000245517	SLAMF1/TRAF3IP2/TNFAIP3/RNF31/TREM2/CD40LG/ITGA5	7
BP	GO:0010951	negative regulation of endopeptidase activity	35/1228	252/18723	2.10052e-05	0.000356706	0.00024846	MMP9/TIMP1/PROS1/TNFAIP8/SPINK9/PLAUR/BCL2L12/SERPINF2/SERPINF1/NAIP/SERPINA5/TNF/SERPINE1/LAMP3/SERPINB12/COL6A3/GAS6/RENBP/TFPI2/TIMP3/RARRES1/SPOCK1/KLF4/MICAL1/PAPLN/ANXA2/RPS6KA1/IFI6/SERPINE2/CD44/SORL1/PTGS2/NOL3/TIMP2/FURIN	35
BP	GO:0034446	substrate adhesion-dependent cell spreading	20/1228	108/18723	2.13052e-05	0.000360704	0.000251246	FN1/PDPN/TACSTD2/ANTXR1/ITGA4/FERMT3/FZD4/S100A10/EFNA1/ITGB7/PARVB/PARVG/FBLN1/LAMA5/PREX1/ILK/FZD7/CORO1C/AXL/UNC13D	20
BP	GO:0032872	regulation of stress-activated MAPK cascade	29/1228	192/18723	2.18678e-05	0.00036911	0.000257101	SLAMF1/LTBR/GADD45A/CLEC7A/CRACR2A/PTK2B/CCL19/CCL21/DUSP10/SERPINF2/SCIMP/TREM2/TNF/PTPN22/NCF1/FAS/SFRP1/TRAF2/WNT7B/SASH1/EDAR/DAB2IP/TNFRSF19/SIRPA/MYC/SPI1/FZD7/SPHK1/IGF1R	29
BP	GO:2000146	negative regulation of cell motility	45/1228	359/18723	2.20629e-05	0.000371281	0.000258613	TGFB1/IGFBP3/TIMP1/APOD/GADD45A/PTN/SRGAP1/CXCL13/CCL21/VASH1/SULF1/DUSP10/SERPINF1/CX3CR1/MITF/AIF1/TNF/SERPINE1/TACSTD2/ADORA3/ANGPT2/SFRP1/CXCL12/CLDN5/WAS/ARHGAP4/LRP1/ARHGDIB/FBLN1/SLIT2/CD74/DPYSL3/KLF4/GREM1/PADI2/DAB2IP/ILK/CORO1C/APOE/CYGB/MMP28/PTGER4/NR2F2/RIN3/DNAJA4	45
BP	GO:0002292	T cell differentiation involved in immune response	16/1228	75/18723	2.28663e-05	0.000382497	0.000266425	BCL6/FCER1G/FGL2/STAT6/CRACR2A/LEF1/ANXA1/CCL19/BATF/SPN/NFKBID/JAK3/BCL3/TBX21/RARA/PTGER4	16
BP	GO:0033077	T cell differentiation in thymus	16/1228	75/18723	2.28663e-05	0.000382497	0.000266425	TESPA1/VNN1/CD3E/CD3D/PTPRC/TP53/IL7R/ZFP36L1/ZFP36L2/CARD11/ADAM8/CD74/MAFB/FZD7/FOXJ1/DOCK2	16
BP	GO:0045807	positive regulation of endocytosis	19/1228	100/18723	2.3354e-05	0.000389489	0.000271295	CD14/CCL19/CCL21/ITGA2/DAB2/TREM2/SERPINE1/NCKAP1L/GATA2/FLOT1/RAB31/HIP1/GPC3/LRP1/AHI1/ANXA2/GREM1/AXL/APOE	19
BP	GO:0048562	embryonic organ morphogenesis	38/1228	285/18723	2.41721e-05	0.000401934	0.000279964	MMP14/ACVR1/TBX15/PDGFRA/TGFB3/ATP6V1B1/OSR2/MMP16/HYAL1/EDN1/HOXC9/SMAD3/FOXF1/GATA2/RUNX2/MDFI/KCNQ4/MED12/EFNA1/SEC24B/AHI1/MTHFD1L/EPHA2/EFEMP1/MAFB/USH1C/PRRX1/TEAD2/SOX9/TBX2/HOXB2/FZD2/FOXI1/MESP1/GSC/ASB2/ALDH1A3/TGFBR2	38
BP	GO:1903305	regulation of regulated secretory pathway	23/1228	136/18723	2.47257e-05	0.000409918	0.000285525	ITGB2/RAC2/GNAI2/ITGAM/NCKAP1L/FOXF1/PTAFR/PRKCB/GATA2/ADRA2A/SYT7/SYT8/TRPV6/GIPC1/MICAL1/FGR/KCNB1/SPI1/SYT13/UNC13D/DOC2B/FES/STX1A	23
BP	GO:0071346	cellular response to interferon-gamma	21/1228	118/18723	2.50659e-05	0.000414328	0.000288597	CLDN1/TXK/ICAM1/CCL19/CCL21/IFNGR1/MRC1/CCL22/CCL5/TP53/AIF1/EDN1/CDC42EP2/WAS/ZYX/RAB20/VIM/SIRPA/HCK/NMI/MED1	21
BP	GO:0031638	zymogen activation	14/1228	60/18723	2.53703e-05	0.000418124	0.000291241	MMP14/CTSH/C1R/CTSL/SERPINF2/LGMN/PLAT/PLAU/SERPINE1/BAD/RUNX1/CTSZ/SERPINE2/FURIN	14
BP	GO:0009410	response to xenobiotic stimulus	54/1228	462/18723	2.60404e-05	0.000427905	0.000298054	APOD/NCEH1/XRCC5/TXNIP/GSTM3/DDC/PTN/PDE3A/ICAM1/LOX/ANXA1/PTK2B/ABCA1/TRAF3IP2/FMO2/MAP2K6/ITGA2/EDN1/ADIRF/NCKAP1L/OXCT1/EHMT2/CDKN1A/TFAP2B/TGIF1/SFRP1/VEGFC/VEGFB/BAD/CPT1A/GAS6/BCAR3/ABCD3/S100A10/DVL3/AHR/FZD1/DUSP6/LGALS1/TSPO/CBR3/FYN/SOD2/AGPAT2/ABCC4/LCK/MYC/PTGS2/CDH3/TIMP2/PPP1R9B/PRKAA1/TGFBR2/NFATC2	54
BP	GO:2001234	negative regulation of apoptotic signaling pathway	32/1228	224/18723	2.65674e-05	0.000435285	0.000303194	MMP9/ACVR1/ICAM1/VNN1/TNFAIP3/SLC35F6/SNAI2/PLAUR/CX3CR1/GNAI2/TNF/SERPINE1/SNAI1/ACKR3/ITPRIP/CXCL12/LMNA/PEA15/ZNF385A/WFS1/CD74/FYN/SOD2/IFI6/IL7/CD44/NOC2L/PTGS2/NOL3/BAX/MEIS3/MNT	32
BP	GO:0051090	regulation of DNA-binding transcription factor activity	52/1228	440/18723	2.71258e-05	0.000439261	0.000305963	TMSB4X/HCLS1/CLEC7A/ICAM1/HAVCR2/TNFAIP3/RNF31/CX3CR1/BHLHE40/NFKBIE/TNF/EDN1/SFRP5/ARID5B/BTK/CD40LG/NDN/ADORA3/NFAM1/SMAD3/PRKCB/FLOT1/MDFI/GLIS2/CARD11/NLRC3/ADAM8/FZD4/TRAF2/GAS6/GFI1/FZD1/LPAR5/KIT/WFS1/TRIM14/KLF4/ENPP1/GREM1/DAB2IP/CAMK1D/HCK/PTGIS/SPI1/TRADD/BCL3/SPHK1/FOXJ1/FLOT2/FZD2/SLCO3A1/FOXA1	52
BP	GO:0071772	response to BMP	26/1228	165/18723	2.71955e-05	0.000439261	0.000305963	TGFB1/ACVR1/SOSTDC1/LEF1/GDF15/TGFB3/SULF1/TMEM100/SFRP5/SMAD3/RUNX2/TFAP2B/HTRA1/SFRP1/GPC3/HTRA3/EGR1/FSTL3/GREM1/SMAD9/ILK/SORL1/SMAD1/ZNF423/SOX9/ADAMTS7	26
BP	GO:0071773	cellular response to BMP stimulus	26/1228	165/18723	2.71955e-05	0.000439261	0.000305963	TGFB1/ACVR1/SOSTDC1/LEF1/GDF15/TGFB3/SULF1/TMEM100/SFRP5/SMAD3/RUNX2/TFAP2B/HTRA1/SFRP1/GPC3/HTRA3/EGR1/FSTL3/GREM1/SMAD9/ILK/SORL1/SMAD1/ZNF423/SOX9/ADAMTS7	26
BP	GO:0001765	membrane raft assembly	6/1228	11/18723	2.72818e-05	0.000439261	0.000305963	FLOT1/EMP2/S100A10/RFTN1/ANXA2/FLOT2	6
BP	GO:0033632	regulation of cell-cell adhesion mediated by integrin	6/1228	11/18723	2.72818e-05	0.000439261	0.000305963	CXCL13/CD3E/CCL5/FERMT3/PODXL/SKAP1	6
BP	GO:0098883	synapse pruning	6/1228	11/18723	2.72818e-05	0.000439261	0.000305963	C1QB/C1QA/CX3CR1/TREM2/ITGAM/C1QC	6
BP	GO:0002347	response to tumor cell	11/1228	39/18723	2.80599e-05	0.000449199	0.000312886	HNMT/LAPTM5/TXNIP/HAVCR2/CD274/PRF1/CRTAM/AHR/KLF4/SPI1/ABI3	11
BP	GO:0010463	mesenchymal cell proliferation	11/1228	39/18723	2.80599e-05	0.000449199	0.000312886	PTN/FGF7/FOXF1/GPC3/LMNA/IRS2/MYC/DCHS1/PRRX1/SOX9/TGFBR2	11
BP	GO:0001952	regulation of cell-matrix adhesion	22/1228	128/18723	2.84725e-05	0.000454502	0.00031658	MMP14/APOD/BCL6/PTK2B/CCL21/CD3E/PLAU/SERPINE1/CSF1/SMAD3/EMP2/SFRP1/EFEMP2/S100A10/LRP1/BST1/ACER2/GREM1/SDC4/ILK/CORO1C/SKAP1	22
BP	GO:0006887	exocytosis	44/1228	352/18723	2.90228e-05	0.000461968	0.00032178	ITGB2/S100A13/MYO1G/RAC2/ANXA1/PLEK/CCL5/MILR1/GNAI2/ITGAM/BTK/NCKAP1L/FOXF1/PTAFR/PRKCB/LAT2/GATA2/RAB31/RAB27B/CORO1A/LAT/ADRA2A/RAB3IL1/SYT7/SYT8/TRPV6/SCIN/KIT/GIPC1/MICAL1/ABCC4/FGR/HCK/SDC4/KCNB1/ATP9A/SPI1/SYT13/PIK3CD/RALB/UNC13D/DOC2B/FES/STX1A	44
BP	GO:0070302	regulation of stress-activated protein kinase signaling cascade	29/1228	195/18723	2.93895e-05	0.000466475	0.000324919	SLAMF1/LTBR/GADD45A/CLEC7A/CRACR2A/PTK2B/CCL19/CCL21/DUSP10/SERPINF2/SCIMP/TREM2/TNF/PTPN22/NCF1/FAS/SFRP1/TRAF2/WNT7B/SASH1/EDAR/DAB2IP/TNFRSF19/SIRPA/MYC/SPI1/FZD7/SPHK1/IGF1R	29
BP	GO:0097193	intrinsic apoptotic signaling pathway	38/1228	288/18723	3.05722e-05	0.000483873	0.000337038	MMP9/TP63/VNN1/SNAI2/PLAUR/TP53/BCL2A1/TREM2/TNF/SNAI1/FNIP2/CDKN1A/PMAIP1/ACKR3/SGMS1/CXCL12/BAD/CRIP1/TRAF2/ZNF385A/WFS1/CD74/RNF183/SOD2/EPHA2/NFATC4/DAB2IP/IFI6/LCK/CD44/USP28/TNFRSF1B/NOC2L/PTGS2/NOL3/BCL3/BAX/HIC1	38
BP	GO:0034113	heterotypic cell-cell adhesion	14/1228	61/18723	3.09601e-05	0.000488627	0.000340349	ITGB2/IL1RN/PTPRC/TNF/ITGA4/FLOT1/ITGAX/ITGA5/ITGB7/KLF4/SIRPA/LCK/CD44/SKAP1	14
BP	GO:0035455	response to interferon-alpha	8/1228	21/18723	3.15069e-05	0.000494464	0.000344415	IFIT2/LAMP3/KLHL20/IFIT3/GAS6/IFNAR2/MX2/AXL	8
BP	GO:0150146	NA	8/1228	21/18723	3.15069e-05	0.000494464	0.000344415	C1QB/C1QA/TGFB3/SNAI2/CX3CR1/TREM2/ITGAM/C1QC	8
BP	GO:0002335	mature B cell differentiation	10/1228	33/18723	3.26596e-05	0.000509691	0.000355021	DOCK10/MFNG/PTK2B/CD19/LFNG/DOCK11/LGALS1/SPI1/POU2AF1/BCL3	10
BP	GO:0043552	positive regulation of phosphatidylinositol 3-kinase activity	10/1228	33/18723	3.26596e-05	0.000509691	0.000355021	TGFB1/PDGFRA/PTK2B/CCL19/CCL21/CD19/KIT/PDGFRB/TNFAIP8L3/FGR	10
BP	GO:0051384	response to glucocorticoid	24/1228	148/18723	3.39196e-05	0.000527879	0.00036769	CLDN1/S100B/HNMT/ICAM1/ANXA1/IL1RN/ZFP36/SERPINF1/AIF1/TNF/EDN1/ADAM9/ZFP36L1/ZFP36L2/PTAFR/CDKN1A/TFAP4/BAD/WNT7B/SLIT2/GJB2/PTGS2/SLIT3/GLB1	24
BP	GO:1990830	cellular response to leukemia inhibitory factor	18/1228	94/18723	3.40684e-05	0.000528723	0.000368278	NRP2/XRCC5/ICAM1/ARID5B/PARP16/VEGFC/FZD4/EPS8/PCOLCE2/SBNO2/GFPT2/KLF4/PADI2/B3GNT2/PFKP/MSC/DTX1/SOCS3	18
BP	GO:0006968	cellular defense response	13/1228	54/18723	3.44506e-05	0.000530063	0.000369211	ITK/PTK2B/NCF2/TYROBP/CX3CR1/CCR5/SPN/PRF1/SH2D1A/NCF1/LSP1/FCMR/LGALS3BP	13
BP	GO:0030324	lung development	27/1228	177/18723	3.47035e-05	0.000530063	0.000369211	CHI3L1/MMP14/CTSH/PTN/PDGFRA/LOX/FGF7/TGFB3/PDPN/HSD11B1/CRISPLD2/TNF/FOXF1/LTBP3/GPC3/WNT7B/SEC24B/PDGFRB/FSTL3/LAMA5/CTSZ/SPRY1/RCN3/FOXJ1/SOX9/FOXA1/TGFBR2	27
BP	GO:0043405	regulation of MAP kinase activity	27/1228	177/18723	3.47035e-05	0.000530063	0.000369211	TGFB1/PTK2B/CCL19/DUSP10/TNF/EDN1/ADAM9/PTPN22/ADAM8/ADRA2A/FGFR1/SFRP1/FZD4/TRAF2/DVL3/PTPN6/KIT/PDGFRB/SASH1/DAB2IP/ILK/SORL1/LAX1/SPRY1/IL34/APOE/PIK3R5	27
BP	GO:0034138	toll-like receptor 3 signaling pathway	7/1228	16/18723	3.47041e-05	0.000530063	0.000369211	HAVCR2/TNFAIP3/SCIMP/PTPN22/FLOT1/COLEC12/RFTN1	7
BP	GO:0051044	positive regulation of membrane protein ectodomain proteolysis	7/1228	16/18723	3.47041e-05	0.000530063	0.000369211	TNF/ADAM9/ADAM8/ADRA2A/TNFRSF1B/APOE/FURIN	7
BP	GO:0060142	regulation of syncytium formation by plasma membrane fusion	9/1228	27/18723	3.4724e-05	0.000530063	0.000369211	CD53/GDF15/TYROBP/TREM2/ADAM9/FLOT1/EHD1/PLEKHO1/NFATC2	9
BP	GO:0036293	response to decreased oxygen levels	41/1228	322/18723	3.50511e-05	0.000533599	0.000371674	MMP14/UCP2/S100B/PTN/ICAM1/PTK2B/TGFB3/EDNRA/MMP2/TP53/STC2/ITGA2/TREM2/EDN1/PLAT/PLAU/SMAD3/ZFP36L1/ANGPT2/SLC29A1/PMAIP1/VASN/ADAM8/SFRP1/VEGFC/CXCL12/VEGFB/BAD/LMNA/EGR1/BNIP3L/SOD2/PTGIS/MYC/PTGS2/CBFA2T3/NOL3/SIRT2/CYGB/PRKAA1/TGFBR2	41
BP	GO:0070374	positive regulation of ERK1 and ERK2 cascade	31/1228	217/18723	3.52755e-05	0.000535555	0.000373037	CHI3L1/SLAMF1/TGFB1/PDGFRA/ICAM1/HAVCR2/GLIPR2/PTK2B/CCL19/CCL21/PTPRC/CCL22/CCL5/SERPINF2/SCIMP/GNAI2/TREM2/TNF/PTPN22/RAMP3/ACKR3/GAS6/LRP1/CD74/PDGFRB/AKAP12/TNFAIP8L3/CD44/GPBAR1/APOE/PDE8A	31
BP	GO:0045598	regulation of fat cell differentiation	23/1228	139/18723	3.53752e-05	0.000535612	0.000373076	RARRES2/TGFB1/DUSP10/ZFP36/TNF/ADIRF/CCDC71L/SMAD3/ZFP36L1/ZFP36L2/GATA2/ATAT1/SFRP1/ALOX5/ZNF385A/GNB3/CDS1/ENPP1/MEDAG/PTGS2/MMP11/SIRT2/METRNL	23
BP	GO:0030336	negative regulation of cell migration	43/1228	344/18723	3.5611e-05	0.000537726	0.000374549	TGFB1/IGFBP3/TIMP1/APOD/GADD45A/PTN/SRGAP1/CXCL13/CCL21/VASH1/SULF1/DUSP10/SERPINF1/CX3CR1/MITF/AIF1/TNF/SERPINE1/TACSTD2/ADORA3/ANGPT2/SFRP1/CXCL12/CLDN5/ARHGAP4/LRP1/ARHGDIB/SLIT2/CD74/DPYSL3/KLF4/GREM1/PADI2/DAB2IP/ILK/CORO1C/APOE/CYGB/MMP28/PTGER4/NR2F2/RIN3/DNAJA4	43
BP	GO:0010543	regulation of platelet activation	11/1228	40/18723	3.64249e-05	0.000545592	0.000380028	FCER1G/TXK/PDGFRA/PLEK/PDPN/PLA2G4A/SELP/SERPINE2/UBASH3B/ADAMTS18/APOE	11
BP	GO:0010863	positive regulation of phospholipase C activity	11/1228	40/18723	3.64249e-05	0.000545592	0.000380028	TXK/PDGFRA/ITK/EDNRA/PTAFR/FGFR1/KIT/PDGFRB/GNA15/S1PR4/PLCB2	11
BP	GO:1904994	regulation of leukocyte adhesion to vascular endothelial cell	11/1228	40/18723	3.64249e-05	0.000545592	0.000380028	ITGB2/ICAM1/CCL21/TNF/ITGA4/SELP/PTAFR/CXCL12/ALOX5/ST3GAL4/KLF4	11
BP	GO:0001774	microglial cell activation	12/1228	47/18723	3.66255e-05	0.000545672	0.000380083	ITGB2/C1QA/IFNGR1/PTPRC/TYROBP/CX3CR1/TREM2/AIF1/TNF/ITGAM/CTSC/SPHK1	12
BP	GO:0097028	dendritic cell differentiation	12/1228	47/18723	3.66255e-05	0.000545672	0.000380083	LTBR/CCL19/BATF/TREM2/TMEM176B/GAS6/TMEM176A/TRPM2/SPI1/BATF3/AXL/TGFBR2	12
BP	GO:0010975	regulation of neuron projection development	52/1228	445/18723	3.67747e-05	0.000546282	0.000380508	FN1/PTN/PTK2B/DGUOK/SERPINF1/PMP22/INPP5F/PQBP1/PLXNC1/MBOAT1/MYLIP/LIMK1/SFRP1/CXCL12/EHD1/ARHGAP4/GFI1/EFNA1/CRABP2/FZD1/LRP1/LGALS1/SLIT2/NR2F1/DPYSL3/SPOCK1/DBN1/SEMA6A/KLF4/FYN/UST/NFATC4/DAB2IP/CAMK1D/VIM/CTSZ/PREX1/LRP4/TSKU/APBB1/ILK/PRRX1/APOE/KLK6/SCN1B/SARM1/TRPV2/ABI3/SEMA5A/ENC1/FES/PLXNB1	52
BP	GO:1901222	regulation of NIK/NF-kappaB signaling	20/1228	112/18723	3.68621e-05	0.000546282	0.000380508	TMSB4X/LAPTM5/CD14/HAVCR2/CCL19/TREM2/TNF/EDN1/PTPN22/NLRC3/SASH1/GREM1/EDAR/SPI1/ILK/TRADD/NOL3/BCL3/NMI/SPHK1	20
BP	GO:0019932	second-messenger-mediated signaling	40/1228	312/18723	3.71747e-05	0.000549457	0.00038272	CXCR3/PDE3A/CLEC7A/PTK2B/PLEK/CD3E/PTPRC/TMEM100/CX3CR1/CCR8/LMCD1/CCRL2/CCR5/TREM2/TNF/EDN1/BTK/CLIC2/SELP/LAT2/NFATC1/ACKR3/LAT/CHP2/TBC1D10C/AHR/BST1/HOMER3/NPR2/TRPM2/NFATC4/FHL2/RCAN3/APOE/SPHK1/SOX9/PPP1R9B/PRKAA1/HRH1/NFATC2	40
BP	GO:0045428	regulation of nitric oxide biosynthetic process	14/1228	62/18723	3.76016e-05	0.000554301	0.000386094	CLEC7A/ICAM1/PTK2B/CX3CR1/AIF1/TNF/EDN1/SMAD3/PTX3/TSPO/KLF4/SIRPA/PTGIS/PTGS2	14
BP	GO:0045834	positive regulation of lipid metabolic process	24/1228	149/18723	3.79631e-05	0.000557126	0.000388061	ELOVL5/TGFB1/PDGFRA/ANXA1/PTK2B/CCL19/CCL21/TNF/RAB38/CD19/ABHD5/CPT1A/KIT/CD74/PDGFRB/ABCG1/TNFAIP8L3/IRS2/FGR/EEF1A2/DGKZ/PTGS2/APOE/PRKAA1	24
BP	GO:0062012	regulation of small molecule metabolic process	42/1228	334/18723	3.79926e-05	0.000557126	0.000388061	ELOVL5/IGFBP4/TMSB4X/CD244/PDK4/ETFBKMT/ANXA1/PTK2B/SLC7A7/PLEK/SNAI2/TP53/TREM2/TNF/PPP1R3C/ARL2/SNAI1/PTAFR/PPP1R3G/PMAIP1/FOXK1/BAD/CPT1A/GFI1/GNB3/KIT/CD74/EGR1/ABCG1/ENPP1/SLC2A6/IRS2/DKK3/ACADL/PTGS2/CBFA2T3/APOE/SOX9/PRKAA1/MST1/PTH1R/HRH1	42
BP	GO:0051271	negative regulation of cellular component movement	45/1228	367/18723	3.80934e-05	0.00055714	0.000388072	TGFB1/IGFBP3/TIMP1/APOD/GADD45A/PTN/SRGAP1/CXCL13/CCL21/VASH1/SULF1/DUSP10/SERPINF1/CX3CR1/MITF/AIF1/TNF/SERPINE1/TACSTD2/ADORA3/ANGPT2/SFRP1/CXCL12/CLDN5/WAS/ARHGAP4/LRP1/ARHGDIB/FBLN1/SLIT2/CD74/DPYSL3/KLF4/GREM1/PADI2/DAB2IP/ILK/CORO1C/APOE/CYGB/MMP28/PTGER4/NR2F2/RIN3/DNAJA4	45
BP	GO:0043122	regulation of I-kappaB kinase/NF-kappaB signaling	34/1228	249/18723	3.9035e-05	0.000569421	0.000396626	LTBR/S100B/S100A13/S100A4/WLS/CLEC7A/CLEC6A/CCL19/CCL21/TRAF3IP2/TNFAIP3/RNF31/TGM2/TREM2/TNF/PIM2/PRKCB/CARD11/NLRC3/IFIT5/TRAF2/LGALS1/CD74/CXXC5/SLC44A2/SQSTM1/TRIM14/FYN/EDAR/DAB2IP/NEK6/TNFRSF19/TRADD/MAP3K14	34
BP	GO:1990823	response to leukemia inhibitory factor	18/1228	95/18723	3.94922e-05	0.000574591	0.000400227	NRP2/XRCC5/ICAM1/ARID5B/PARP16/VEGFC/FZD4/EPS8/PCOLCE2/SBNO2/GFPT2/KLF4/PADI2/B3GNT2/PFKP/MSC/DTX1/SOCS3	18
BP	GO:0072593	reactive oxygen species metabolic process	33/1228	239/18723	4.02773e-05	0.000584492	0.000407123	ITGB2/TGFB1/GADD45A/PDK4/RAC2/CLEC7A/GPX3/PTK2B/BCO2/NCF2/TYROBP/TP53/GNAI2/TNF/EDN1/ITGAM/MPV17/CDKN1A/PMAIP1/NCF1/ALOX5/TSPO/BST1/PDGFRB/FYN/SOD2/IFI6/PREX1/PRDX6/SIRT2/SH3PXD2B/FBLN5/TGFBR2	33
BP	GO:0051222	positive regulation of protein transport	39/1228	303/18723	4.23573e-05	0.000613084	0.000427039	ITGB2/TGFB1/HCLS1/WLS/RAC2/UBL5/RNF31/TGFB3/TREM2/TNF/ITGAM/ADAM9/SMAD3/OXCT1/MYRIP/CHP2/BAG3/ADAM8/ZDHHC2/VEGFC/BAD/CHRM1/GAS6/LRP1/ABCG1/TRPM2/ANP32B/FYN/IRS2/KCNB1/MFF/APBB1/SORL1/UBE2J2/PTGS2/USP36/DOC2B/NLGN2/PRKAA1	39
BP	GO:0040013	negative regulation of locomotion	47/1228	391/18723	4.26944e-05	0.000616365	0.000429324	TGFB1/IGFBP3/TIMP1/APOD/GADD45A/PTN/SRGAP1/CXCL13/CCL21/VASH1/SULF1/DUSP10/SERPINF1/CX3CR1/MITF/AIF1/TNF/SERPINE1/TACSTD2/ADORA3/ANGPT2/SFRP1/CXCL12/CLDN5/WAS/ARHGAP4/LRP1/ARHGDIB/FBLN1/SLIT2/CD74/DPYSL3/SEMA6A/KLF4/GREM1/PADI2/DAB2IP/ILK/CORO1C/APOE/CYGB/MMP28/PTGER4/SEMA5A/NR2F2/RIN3/DNAJA4	47
BP	GO:0001823	mesonephros development	18/1228	96/18723	4.5669e-05	0.00065761	0.000458053	OSR2/TACSTD2/SMAD3/SFRP1/GPC3/SLIT2/GREM1/LAMA5/SDC4/MYC/ILK/DCHS1/SPRY1/SMAD1/FOXJ1/SOX9/RARA/BASP1	18
BP	GO:0044706	multi-multicellular organism process	31/1228	220/18723	4.60973e-05	0.000662071	0.00046116	UCP2/MMP9/AKR1B1/TIMP1/PTN/JUNB/HAVCR2/TGFB3/MMP7/MMP2/STC2/ITGA2/EDN1/PTAFR/ANGPT2/EMP2/ARHGDIB/MAFF/FBLN1/CTSB/HPGD/GJB2/SERPINE2/PTGS2/ITGB4/VMP1/MED1/RARA/HEXB/NR2F2/TGFBR2	31
BP	GO:1905521	regulation of macrophage migration	11/1228	41/18723	4.68517e-05	0.000671181	0.000467506	SLAMF1/MMP14/RARRES2/PTK2B/CCL5/CX3CR1/TREM2/CSF1/MTUS1/IL34/MMP28	11
BP	GO:0002313	mature B cell differentiation involved in immune response	9/1228	28/18723	4.82065e-05	0.000688823	0.000479794	DOCK10/MFNG/PTK2B/LFNG/DOCK11/LGALS1/SPI1/POU2AF1/BCL3	9
BP	GO:0030101	natural killer cell activation	17/1228	88/18723	4.96625e-05	0.000707818	0.000493025	SLAMF1/CD244/SLAMF7/HAVCR2/PTPRC/TYROBP/IL21R/PTPN22/ZNF683/CORO1A/GAS6/ELF4/FGR/IL15RA/PIK3CD/AXL/UNC13D	17
BP	GO:0072006	nephron development	23/1228	142/18723	4.99756e-05	0.000709082	0.000493905	PDGFRA/KLHL3/SULF1/TACSTD2/MPV17/ANGPT2/TFAP2B/GPC3/PODXL/WNT7B/PROM1/PDGFRB/EGR1/AHI1/GREM1/LAMA5/SULF2/MYC/ILK/DCHS1/FOXJ1/SOX9/BASP1	23
BP	GO:0002831	regulation of response to biotic stimulus	41/1228	327/18723	5.00051e-05	0.000709082	0.000493905	CD96/XRCC5/FGL2/CLEC7A/CLEC6A/TXK/HAVCR2/CD274/TRAF3IP2/TNFAIP3/DUSP10/ISG15/TYROBP/CCL5/SCIMP/CD180/TREM2/LY86/SH2D1A/PQBP1/PTPN22/CRTAM/TLR8/NCF1/NLRC3/HTRA1/ADAM8/AHR/PTPN6/MATR3/FYN/SASH1/FGR/HCK/SAMHD1/SPI1/ZDHHC1/SIRT2/APOE/NMI/MED1	41
BP	GO:0030323	respiratory tube development	27/1228	181/18723	5.17308e-05	0.00072801	0.000507089	CHI3L1/MMP14/CTSH/PTN/PDGFRA/LOX/FGF7/TGFB3/PDPN/HSD11B1/CRISPLD2/TNF/FOXF1/LTBP3/GPC3/WNT7B/SEC24B/PDGFRB/FSTL3/LAMA5/CTSZ/SPRY1/RCN3/FOXJ1/SOX9/FOXA1/TGFBR2	27
BP	GO:0045766	positive regulation of angiogenesis	27/1228	181/18723	5.17308e-05	0.00072801	0.000507089	CHI3L1/CTSH/S100A1/PTK2B/PKM/CX3CR1/HYAL1/SERPINE1/PRKCB/ANGPT2/GATA2/ITGAX/VEGFC/VEGFB/F3/ITGA5/KLF4/RUNX1/SASH1/GREM1/PTGIS/PIK3CD/SMAD1/SPHK1/TNFSF12/SEMA5A/TGFBR2	27
BP	GO:1904018	positive regulation of vasculature development	27/1228	181/18723	5.17308e-05	0.00072801	0.000507089	CHI3L1/CTSH/S100A1/PTK2B/PKM/CX3CR1/HYAL1/SERPINE1/PRKCB/ANGPT2/GATA2/ITGAX/VEGFC/VEGFB/F3/ITGA5/KLF4/RUNX1/SASH1/GREM1/PTGIS/PIK3CD/SMAD1/SPHK1/TNFSF12/SEMA5A/TGFBR2	27
BP	GO:0002886	regulation of myeloid leukocyte mediated immunity	13/1228	56/18723	5.19743e-05	0.000729599	0.000508196	ITGB2/RAC2/TYROBP/CX3CR1/ITGAM/BTK/FOXF1/PTAFR/GATA2/FGR/SPI1/UNC13D/FES	13
BP	GO:1902903	regulation of supramolecular fiber organization	46/1228	383/18723	5.23565e-05	0.000733122	0.00051065	TMSB4X/HCLS1/S1PR1/ICAM1/FCHSD1/PTK2B/CCL21/TGFB3/PLEK/COTL1/SERPINF2/TREM2/EDN1/ARL2/TACSTD2/NCKAP1L/SMAD3/ADD3/CORO1A/LIMK1/SFRP1/CXCL12/EFEMP2/CDC42EP2/WAS/S100A10/AEBP1/SCIN/EPS8/SH3BP1/PDXP/SLIT2/DBN1/MAP1S/CAPZB/CDC42EP3/TMSB10/WASF3/HCK/SDC4/PREX1/FHOD1/APOE/PTGER4/SEMA5A/FES	46
BP	GO:0030509	BMP signaling pathway	24/1228	152/18723	5.28229e-05	0.000737804	0.000513911	TGFB1/ACVR1/SOSTDC1/LEF1/GDF15/TGFB3/SULF1/TMEM100/SFRP5/SMAD3/RUNX2/TFAP2B/HTRA1/SFRP1/GPC3/HTRA3/EGR1/FSTL3/GREM1/SMAD9/ILK/SORL1/SMAD1/ZNF423	24
BP	GO:0001909	leukocyte mediated cytotoxicity	21/1228	124/18723	5.37313e-05	0.000748621	0.000521446	CTSH/SLAMF7/CD1E/ICAM1/HAVCR2/PTPRC/TYROBP/IL7R/CX3CR1/TREM1/ITGAM/PRF1/SH2D1A/NCKAP1L/CRTAM/CORO1A/EMP2/CTSC/PTPN6/SPI1/UNC13D	21
BP	GO:0042116	macrophage activation	19/1228	106/18723	5.42285e-05	0.000753668	0.000524961	ITGB2/C1QA/HAVCR2/IFNGR1/IL1RL1/PLA2G4A/PTPRC/TYROBP/CX3CR1/TREM2/AIF1/TNF/ITGAM/GPR137B/CTSC/CD74/SBNO2/NMI/SPHK1	19
BP	GO:0080164	regulation of nitric oxide metabolic process	14/1228	64/18723	5.4714e-05	0.000758529	0.000528347	CLEC7A/ICAM1/PTK2B/CX3CR1/AIF1/TNF/EDN1/SMAD3/PTX3/TSPO/KLF4/SIRPA/PTGIS/PTGS2	14
BP	GO:0007219	Notch signaling pathway	26/1228	172/18723	5.62917e-05	0.00077847	0.000542237	MMP14/TP63/BCL6/MFNG/TSPAN5/IFT74/ENHO/SNAI2/TMEM100/SNAI1/MESP2/GATA2/LFNG/DTX3/KIT/NOTCH3/IL2RA/SLC35C2/MAML2/DTX1/ZNF423/SOX9/TBX2/MESP1/FOXA1/TGFBR2	26
BP	GO:0006692	prostanoid metabolic process	12/1228	49/18723	5.72465e-05	0.000785265	0.00054697	AKR1B1/ANXA1/PTGR1/ATP6V1B1/PTGS1/PLA2G4A/EDN1/CD74/HPGD/PTGES/PTGIS/PTGS2	12
BP	GO:0006693	prostaglandin metabolic process	12/1228	49/18723	5.72465e-05	0.000785265	0.00054697	AKR1B1/ANXA1/PTGR1/ATP6V1B1/PTGS1/PLA2G4A/EDN1/CD74/HPGD/PTGES/PTGIS/PTGS2	12
BP	GO:0030195	negative regulation of blood coagulation	12/1228	49/18723	5.72465e-05	0.000785265	0.00054697	PROS1/PDGFRA/SERPINF2/EDN1/PLAT/PLAU/SERPINE1/ANXA2/SERPINE2/UBASH3B/ADAMTS18/APOE	12
BP	GO:0045861	negative regulation of proteolysis	43/1228	351/18723	5.73453e-05	0.000785265	0.00054697	MMP9/TIMP1/PROS1/TNFAIP8/SPINK9/PLAUR/BCL2L12/SERPINF2/SERPINF1/TP53/NAIP/SERPINA5/TNF/PLAT/SERPINE1/LAMP3/SERPINB12/COL6A3/GPC3/GAS6/RENBP/EFNA1/TFPI2/LRP1/TIMP3/RARRES1/SPOCK1/GIPC1/KLF4/PTPN3/MICAL1/PAPLN/ANXA2/RPS6KA1/IFI6/CTSZ/SERPINE2/CD44/SORL1/PTGS2/NOL3/TIMP2/FURIN	43
BP	GO:0042552	myelination	22/1228	134/18723	5.8602e-05	0.000800512	0.00055759	S100B/PTN/PMP22/GPC1/ITGAX/MARVELD1/EGR2/CTSC/CLDN5/GALC/MAL/WASF3/B4GALT5/ACER3/ILK/TNFRSF1B/SIRT2/KLK6/ITGB4/RARA/HEXB/TPPP	22
BP	GO:1900274	regulation of phospholipase C activity	11/1228	42/18723	5.97437e-05	0.000814117	0.000567067	TXK/PDGFRA/ITK/EDNRA/PTAFR/FGFR1/KIT/PDGFRB/GNA15/S1PR4/PLCB2	11
BP	GO:0007204	positive regulation of cytosolic calcium ion concentration	40/1228	319/18723	6.136e-05	0.000832084	0.000579581	CXCR3/S1PR1/PDGFRA/CXCL13/PTK2B/CCL19/CCL21/F2RL2/TGM2/MS4A1/PTPRC/EDNRA/CX3CR1/CCR8/CCRL2/CCR5/EDN1/CLIC2/RAMP3/CD19/GATA2/GPR35/CORO1A/ACKR3/PTGER3/TRPV6/LRP1/PTPN6/GNA15/S1PR4/TRPM2/FYN/LCK/UBASH3B/NOL3/BAX/DLG4/TRPV2/PTGER4/PTH1R	40
BP	GO:1904951	positive regulation of establishment of protein localization	40/1228	319/18723	6.136e-05	0.000832084	0.000579581	ITGB2/TGFB1/HCLS1/WLS/RAC2/UBL5/RNF31/TGFB3/TREM2/TNF/ITGAM/ADAM9/SMAD3/OXCT1/MYRIP/CHP2/BAG3/ADAM8/ZDHHC2/VEGFC/BAD/CHRM1/DKC1/GAS6/LRP1/ABCG1/TRPM2/ANP32B/FYN/IRS2/KCNB1/MFF/APBB1/SORL1/UBE2J2/PTGS2/USP36/DOC2B/NLGN2/PRKAA1	40
BP	GO:0045860	positive regulation of protein kinase activity	46/1228	386/18723	6.33173e-05	0.000854644	0.000595295	CHI3L1/TGFB1/XRCC5/ERBB3/GPRC5A/PTK2B/CCL19/CCL21/CDC25B/PTPRC/CCL5/MAP2K6/TNF/EDN1/ADAM9/CSF1/NCKAP1L/PARP16/CDKN1A/NCF1/EMP2/LAT/AFAP1L2/ADAM8/ADRA2A/FGFR1/VEGFC/FZD4/TRAF2/GAS6/EFNA1/DVL3/KIT/PDGFRB/HBEGF/EGR1/SASH1/GREM1/DAB2IP/SDC4/ILK/IL34/RALB/DLG4/PIK3R5/TGFBR2	46
BP	GO:0060760	positive regulation of response to cytokine stimulus	13/1228	57/18723	6.33296e-05	0.000854644	0.000595295	LAPTM5/TXK/TREM2/EDN1/CSF1/TRAF2/GAS6/GFI1/CD74/AGPAT2/IL7/AXL/MED1	13
BP	GO:0001773	myeloid dendritic cell activation	9/1228	29/18723	6.58512e-05	0.000884401	0.000616022	SLAMF1/LTBR/HAVCR2/BATF/CLEC4D/SPI1/BATF3/DOCK2/TGFBR2	9
BP	GO:0090025	regulation of monocyte chemotaxis	9/1228	29/18723	6.58512e-05	0.000884401	0.000616022	S100A14/CCL5/LGMN/CX3CR1/AIF1/SERPINE1/CXCL12/SLIT2/GREM1	9
BP	GO:0034109	homotypic cell-cell adhesion	17/1228	90/18723	6.68408e-05	0.000895539	0.00062378	FN1/PDGFRA/PLEK/PDPN/PLAUR/CCL5/CLIC1/ZNF703/FERMT3/XG/CD99/PTPN6/LGALS1/SERPINE2/ILK/UBASH3B/ADAMTS18	17
BP	GO:0034695	response to prostaglandin E	8/1228	23/18723	6.74599e-05	0.000897377	0.00062506	CCL19/CCL21/GNG2/SFRP1/AKAP8/PPP1R9B/PRKAA1/PTGER4	8
BP	GO:0060143	positive regulation of syncytium formation by plasma membrane fusion	8/1228	23/18723	6.74599e-05	0.000897377	0.00062506	CD53/GDF15/TYROBP/TREM2/ADAM9/FLOT1/EHD1/NFATC2	8
BP	GO:2000810	regulation of bicellular tight junction assembly	8/1228	23/18723	6.74599e-05	0.000897377	0.00062506	CLDN1/SNAI2/TNF/SNAI1/CLDN5/EPHA2/NPHP1/GPBAR1	8
BP	GO:0032874	positive regulation of stress-activated MAPK cascade	21/1228	126/18723	6.83678e-05	0.000907295	0.000631969	SLAMF1/LTBR/GADD45A/CLEC7A/CRACR2A/PTK2B/CCL19/CCL21/SERPINF2/SCIMP/TNF/NCF1/TRAF2/WNT7B/SASH1/EDAR/DAB2IP/TNFRSF19/SPI1/FZD7/SPHK1	21
BP	GO:0090092	regulation of transmembrane receptor protein serine/threonine kinase signaling pathway	34/1228	256/18723	6.87077e-05	0.000909645	0.000633606	TGFB1/ACVR1/SOSTDC1/RASL11B/BMP3/GDF15/LOX/TGFB3/SULF1/TP53/DAB2/SFRP5/SMAD3/TFAP2B/VASN/HTRA1/RBPMS/SFRP1/ZNF703/GPC3/LRP1/HTRA3/FSTL3/GIPC1/CDKN2B/GREM1/PMEPA1/ILK/DKK3/SORL1/SPRY1/INHBB/ZNF423/ZEB2	34
BP	GO:0070231	T cell apoptotic process	12/1228	50/18723	7.08712e-05	0.000933862	0.000650474	CD274/CCL5/TP53/IL7R/SLC46A2/FAS/ADAM8/TSC22D3/EFNA1/JAK3/IL2RA/BAX	12
BP	GO:1900047	negative regulation of hemostasis	12/1228	50/18723	7.08712e-05	0.000933862	0.000650474	PROS1/PDGFRA/SERPINF2/EDN1/PLAT/PLAU/SERPINE1/ANXA2/SERPINE2/UBASH3B/ADAMTS18/APOE	12
BP	GO:0003007	heart morphogenesis	33/1228	246/18723	7.17336e-05	0.000943001	0.00065684	TGFB1/ACVR1/NRP2/S1PR1/SNAI2/TMEM100/TP53/SMAD3/SNAI1/FOXF1/MESP2/EPHB4/CLDN5/EFNA1/SEC24B/SLIT2/AHI1/FHL2/LY6E/ILK/DCHS1/TNNI1/SPRY1/TEAD2/SOX9/AXIN2/TBX2/MED1/FZD2/SLIT3/MESP1/ASB2/TGFBR2	33
BP	GO:0007272	ensheathment of neurons	22/1228	136/18723	7.36689e-05	0.000963906	0.000671401	S100B/PTN/PMP22/GPC1/ITGAX/MARVELD1/EGR2/CTSC/CLDN5/GALC/MAL/WASF3/B4GALT5/ACER3/ILK/TNFRSF1B/SIRT2/KLK6/ITGB4/RARA/HEXB/TPPP	22
BP	GO:0008366	axon ensheathment	22/1228	136/18723	7.36689e-05	0.000963906	0.000671401	S100B/PTN/PMP22/GPC1/ITGAX/MARVELD1/EGR2/CTSC/CLDN5/GALC/MAL/WASF3/B4GALT5/ACER3/ILK/TNFRSF1B/SIRT2/KLK6/ITGB4/RARA/HEXB/TPPP	22
BP	GO:0032635	interleukin-6 production	25/1228	165/18723	7.46515e-05	0.00097221	0.000677185	SLAMF1/CLEC7A/HAVCR2/TNFAIP3/TYROBP/SCIMP/TREM2/AIF1/TNF/PTPN22/NCKAP1L/PTAFR/TLR8/NLRC3/INPP5D/AFAP1L2/GAS6/PTPN6/BANK1/SPON2/CD74/IL17D/SIRPA/POU2AF1/FOXJ1	25
BP	GO:0032675	regulation of interleukin-6 production	25/1228	165/18723	7.46515e-05	0.00097221	0.000677185	SLAMF1/CLEC7A/HAVCR2/TNFAIP3/TYROBP/SCIMP/TREM2/AIF1/TNF/PTPN22/NCKAP1L/PTAFR/TLR8/NLRC3/INPP5D/AFAP1L2/GAS6/PTPN6/BANK1/SPON2/CD74/IL17D/SIRPA/POU2AF1/FOXJ1	25
BP	GO:0001657	ureteric bud development	17/1228	91/18723	7.72469e-05	0.00100367	0.000699099	TACSTD2/SMAD3/SFRP1/GPC3/SLIT2/GREM1/LAMA5/SDC4/MYC/ILK/DCHS1/SPRY1/SMAD1/FOXJ1/SOX9/RARA/BASP1	17
BP	GO:0030193	regulation of blood coagulation	14/1228	66/18723	7.8264e-05	0.00101218	0.000705024	PROS1/PDGFRA/SERPINF2/EDN1/PLAT/PLAU/SERPINE1/ST3GAL4/F3/ANXA2/SERPINE2/UBASH3B/ADAMTS18/APOE	14
BP	GO:0042093	T-helper cell differentiation	14/1228	66/18723	7.8264e-05	0.00101218	0.000705024	BCL6/STAT6/CRACR2A/LEF1/ANXA1/CCL19/BATF/SPN/NFKBID/JAK3/BCL3/TBX21/RARA/PTGER4	14
BP	GO:0042063	gliogenesis	38/1228	301/18723	8.0242e-05	0.00103398	0.000720212	MMP14/TGFB1/S100B/C1QA/PTN/ERBB3/LEF1/ANXA1/PTK2B/IFNGR1/DUSP10/CX3CR1/TREM2/TNF/NDN/CSF1/HDAC11/GPC1/EGR2/CHRM1/MED12/LRP1/TSPO/DAB2IP/WASF3/VIM/B4GALT5/SERPINE2/ILK/TNFRSF1B/MXRA8/DTX1/IL34/SIRT2/ITGB4/SOX9/HEXB/TPPP	38
BP	GO:0031348	negative regulation of defense response	34/1228	258/18723	8.03201e-05	0.00103398	0.000720212	CD96/TNFAIP6/FGL2/HAVCR2/TNFAIP3/DUSP10/ISG15/PTPRC/ZFP36/SERPINF1/TREM2/TNFAIP8L2/SMAD3/FOXF1/NLRC3/HTRA1/ALOX5/KLF4/FYN/FGR/IL2RA/SIRPA/HCK/SAMHD1/PTGIS/TNFRSF1B/SIRT2/APOE/NMI/SIGLEC10/SOCS3/METRNL/PTGER4/FURIN	34
BP	GO:0007389	pattern specification process	50/1228	436/18723	8.31948e-05	0.00106853	0.000744274	TP63/ACVR1/NRP2/C1QA/WLS/SOSTDC1/MFNG/LEF1/IFT74/TP53/MEOX1/BHLHE40/EDN1/ITGAM/HOXC9/SMAD3/SNAI1/FOXF1/MESP2/MDFI/LFNG/HHEX/SFRP1/BICC1/EGR2/MED12/GPC3/BHLHE41/WNT7B/AHI1/GREM1/KIF3B/MAFB/LRP4/DCHS1/HES4/SPRY1/SMAD1/MEIS3/FOXJ1/AXIN2/TBX2/HOXB2/BASP1/MESP1/GSC/NR2F2/ASB2/FOXA1/TGFBR2	50
BP	GO:0050728	negative regulation of inflammatory response	26/1228	176/18723	8.33897e-05	0.00106857	0.000744306	TNFAIP6/TNFAIP3/DUSP10/PTPRC/ZFP36/SERPINF1/TREM2/TNFAIP8L2/SMAD3/FOXF1/NLRC3/ALOX5/KLF4/FYN/FGR/IL2RA/SIRPA/HCK/PTGIS/TNFRSF1B/APOE/SIGLEC10/SOCS3/METRNL/PTGER4/FURIN	26
BP	GO:0002544	chronic inflammatory response	7/1228	18/18723	8.59279e-05	0.00109607	0.000763459	CXCL13/VNN1/TNFAIP3/CCL5/TNF/PTGES/UNC13D	7
BP	GO:0046851	negative regulation of bone remodeling	7/1228	18/18723	8.59279e-05	0.00109607	0.000763459	TNFAIP3/GPR137B/INPP5D/SFRP1/GREM1/UBASH3B/TMEM119	7
BP	GO:0070304	positive regulation of stress-activated protein kinase signaling cascade	21/1228	128/18723	8.645e-05	0.00110022	0.000766349	SLAMF1/LTBR/GADD45A/CLEC7A/CRACR2A/PTK2B/CCL19/CCL21/SERPINF2/SCIMP/TNF/NCF1/TRAF2/WNT7B/SASH1/EDAR/DAB2IP/TNFRSF19/SPI1/FZD7/SPHK1	21
BP	GO:0046850	regulation of bone remodeling	12/1228	51/18723	8.72013e-05	0.00110726	0.000771252	S1PR1/PDK4/TNFAIP3/GPR137B/INPP5D/ADAM8/SFRP1/LTBP3/SYT7/GREM1/UBASH3B/TMEM119	12
BP	GO:0055074	calcium ion homeostasis	52/1228	460/18723	8.77324e-05	0.00111148	0.000774189	CXCR3/S100A14/S1PR1/PDGFRA/CXCL13/PTK2B/CCL19/CCL21/F2RL2/ATP6V1B1/TGM2/MS4A1/PTPRC/EDNRA/CCL5/STC2/CX3CR1/CCR8/CCRL2/CCR5/EDN1/CLIC2/RAMP3/SMAD3/CD19/PRKCB/GATA2/TFAP2B/GPR35/CORO1A/ACKR3/CXCL12/PTGER3/TRPV6/LRP1/PTPN6/MCUB/WFS1/GNA15/S1PR4/TRPM2/FYN/LCK/UBASH3B/NOL3/APOE/BAX/DLG4/TRPV2/PTGER4/HEXB/PTH1R	52
BP	GO:0034694	response to prostaglandin	9/1228	30/18723	8.86288e-05	0.00112029	0.000780331	CCL19/CCL21/GNG2/EDN1/SFRP1/AKAP8/PPP1R9B/PRKAA1/PTGER4	9
BP	GO:0072163	mesonephric epithelium development	17/1228	92/18723	8.90523e-05	0.00112057	0.000780527	TACSTD2/SMAD3/SFRP1/GPC3/SLIT2/GREM1/LAMA5/SDC4/MYC/ILK/DCHS1/SPRY1/SMAD1/FOXJ1/SOX9/RARA/BASP1	17
BP	GO:0072164	mesonephric tubule development	17/1228	92/18723	8.90523e-05	0.00112057	0.000780527	TACSTD2/SMAD3/SFRP1/GPC3/SLIT2/GREM1/LAMA5/SDC4/MYC/ILK/DCHS1/SPRY1/SMAD1/FOXJ1/SOX9/RARA/BASP1	17
BP	GO:0001768	establishment of T cell polarity	6/1228	13/18723	9.03802e-05	0.00113218	0.000788614	CCL19/CCL21/TRAF3IP2/CRTAM/FLOT2/DOCK2	6
BP	GO:0002551	mast cell chemotaxis	6/1228	13/18723	9.03802e-05	0.00113218	0.000788614	RAC2/VEGFC/VEGFB/KIT/PIK3CD/RIN3	6
BP	GO:0002820	negative regulation of adaptive immune response	13/1228	59/18723	9.26283e-05	0.00115771	0.000806391	SLAMF1/SAMSN1/BCL6/HAVCR2/IL1RL1/PTPRC/IL7R/NCKAP1L/AHR/PTPN6/JAK3/FOXJ1/TBX21	13
BP	GO:0010517	regulation of phospholipase activity	14/1228	67/18723	9.30392e-05	0.00115771	0.000806391	TXK/PDGFRA/ITK/ANXA1/EDNRA/CCL5/PTAFR/FGFR1/LRP1/KIT/PDGFRB/GNA15/S1PR4/PLCB2	14
BP	GO:0046635	positive regulation of alpha-beta T cell activation	14/1228	67/18723	9.30392e-05	0.00115771	0.000806391	EBI3/ANXA1/CCL19/CD3E/PTPRC/SASH3/PTPN22/NCKAP1L/NFKBID/CD83/RASAL3/RUNX1/RARA/TGFBR2	14
BP	GO:0045088	regulation of innate immune response	30/1228	218/18723	9.42075e-05	0.00116964	0.000814702	CD96/XRCC5/CLEC7A/CLEC6A/TXK/HAVCR2/TNFAIP3/DUSP10/ISG15/TYROBP/CCL5/TREM2/SH2D1A/PQBP1/PTPN22/CRTAM/TLR8/NCF1/NLRC3/ADAM8/PTPN6/MATR3/FYN/FGR/HCK/SAMHD1/SPI1/APOE/NMI/MED1	30
BP	GO:0043368	positive T cell selection	10/1228	37/18723	9.66157e-05	0.00119688	0.000833676	STAT6/CTSL/BATF/CD3E/CD3D/PTPRC/SPN/CD74/TBX21/DOCK2	10
BP	GO:0006970	response to osmotic stress	16/1228	84/18723	9.77943e-05	0.0012088	0.000841979	AKR1B1/CLDN1/HNMT/XRCC5/PTK2B/TP53/ITGA2/TNF/ZFP36L1/BAD/TSC22D3/RCSD1/TSPO/ICOSLG/PTGS2/BAX	16
BP	GO:0008064	regulation of actin polymerization or depolymerization	27/1228	188/18723	0.000100319	0.00123727	0.000861813	TMSB4X/HCLS1/ICAM1/FCHSD1/PTK2B/CCL21/PLEK/COTL1/NCKAP1L/ADD3/CORO1A/CXCL12/CDC42EP2/WAS/SCIN/EPS8/SH3BP1/PDXP/SLIT2/DBN1/CAPZB/CDC42EP3/TMSB10/WASF3/HCK/PREX1/SEMA5A	27
BP	GO:0010718	positive regulation of epithelial to mesenchymal transition	12/1228	52/18723	0.000106666	0.00130977	0.000912308	TGFB1/ACVR1/LEF1/GLIPR2/TGFB3/PDPN/DAB2/SMAD3/SNAI1/ZNF703/AXIN2/TGFBR2	12
BP	GO:0072132	mesenchyme morphogenesis	12/1228	52/18723	0.000106666	0.00130977	0.000912308	ACVR1/LEF1/SNAI2/TMEM100/SMAD3/SNAI1/FOXF1/MYC/DCHS1/SOX9/TBX2/TGFBR2	12
BP	GO:0030832	regulation of actin filament length	27/1228	189/18723	0.000109879	0.00133819	0.000932106	TMSB4X/HCLS1/ICAM1/FCHSD1/PTK2B/CCL21/PLEK/COTL1/NCKAP1L/ADD3/CORO1A/CXCL12/CDC42EP2/WAS/SCIN/EPS8/SH3BP1/PDXP/SLIT2/DBN1/CAPZB/CDC42EP3/TMSB10/WASF3/HCK/PREX1/SEMA5A	27
BP	GO:0002294	CD4-positive, alpha-beta T cell differentiation involved in immune response	14/1228	68/18723	0.000110179	0.00133819	0.000932106	BCL6/STAT6/CRACR2A/LEF1/ANXA1/CCL19/BATF/SPN/NFKBID/JAK3/BCL3/TBX21/RARA/PTGER4	14
BP	GO:0010812	negative regulation of cell-substrate adhesion	14/1228	68/18723	0.000110179	0.00133819	0.000932106	MMP14/APOD/BCL6/SERPINE1/TACSTD2/ANGPT2/FZD4/LRP1/LGALS1/FBLN1/SPOCK1/ACER2/FZD7/CORO1C	14
BP	GO:0042698	ovulation cycle	14/1228	68/18723	0.000110179	0.00133819	0.000932106	PTN/PDGFRA/TGFB3/MMP7/SERPINF1/MAP2K6/SGPL1/FZD4/PTX3/SLIT2/EGR1/TRPM2/AXL/SLIT3	14
BP	GO:1900046	regulation of hemostasis	14/1228	68/18723	0.000110179	0.00133819	0.000932106	PROS1/PDGFRA/SERPINF2/EDN1/PLAT/PLAU/SERPINE1/ST3GAL4/F3/ANXA2/SERPINE2/UBASH3B/ADAMTS18/APOE	14
BP	GO:0031663	lipopolysaccharide-mediated signaling pathway	13/1228	60/18723	0.000111232	0.00134805	0.000938973	TGFB1/CD14/TNFAIP3/CCL5/SCIMP/CD180/TNF/LY86/PTPN22/PTAFR/SASH1/HCK/SPI1	13
BP	GO:0048545	response to steroid hormone	41/1228	339/18723	0.000112323	0.00135833	0.000946131	TGFB1/CLDN1/TP63/S100B/HNMT/TXNIP/PTN/ICAM1/LOX/ANXA1/TGFB3/IL1RN/ZFP36/SERPINF1/DAB2/AIF1/TNF/EDN1/ADAM9/NCOA4/ZFP36L1/ZFP36L2/PTAFR/CDKN1A/TFAP4/SFRP1/BAD/TSPO/WNT7B/SLIT2/KANK2/PADI2/GJB2/PMEPA1/PTGS2/PPP1R9B/MED1/SLIT3/FOXA1/GLB1/TGFBR2	41
BP	GO:0043406	positive regulation of MAP kinase activity	19/1228	112/18723	0.000117056	0.00140576	0.000979174	TGFB1/PTK2B/CCL19/TNF/EDN1/ADAM9/ADAM8/ADRA2A/FGFR1/FZD4/TRAF2/DVL3/KIT/PDGFRB/SASH1/DAB2IP/ILK/IL34/PIK3R5	19
BP	GO:0043588	skin development	34/1228	263/18723	0.00011749	0.00140576	0.000979174	CLDN1/TP63/TXNIP/SOSTDC1/IFT74/ANXA1/TRAF3IP2/FGF7/ZFP36/TRIM16/ITGA2/TNF/ADAM9/PPHLN1/ZFP36L1/SNAI1/TFAP2B/FOXQ1/APCDD1/ASAH1/PALLD/EPHA2/EDAR/TNFRSF19/LAMA5/LRP4/KAZN/TRADD/CDH3/EVPL/ITGB4/SOX9/MED1/ETV4	34
BP	GO:0030316	osteoclast differentiation	17/1228	94/18723	0.000117503	0.00140576	0.000979174	JUNB/TYROBP/MITF/TREM2/TNF/GPR137B/CSF1/INPP5D/SFRP1/GPC3/SBNO2/FSTL3/ANXA2/EPHA2/MAFB/KLF10/UBASH3B	17
BP	GO:0048704	embryonic skeletal system morphogenesis	17/1228	94/18723	0.000117503	0.00140576	0.000979174	MMP14/TBX15/PDGFRA/TGFB3/OSR2/MMP16/HYAL1/HOXC9/SMAD3/RUNX2/MDFI/MED12/MTHFD1L/PRRX1/HOXB2/GSC/TGFBR2	17
BP	GO:1903035	negative regulation of response to wounding	17/1228	94/18723	0.000117503	0.00140576	0.000979174	PROS1/PDGFRA/SERPINF2/TNF/EDN1/INPP5F/PLAT/PLAU/SERPINE1/SMAD3/ALOX5/ANXA2/SERPINE2/UBASH3B/ADAMTS18/APOE/SIGLEC10	17
BP	GO:0085029	extracellular matrix assembly	11/1228	45/18723	0.000118143	0.00141039	0.000982397	TGFB1/LOX/FKBP10/SMAD3/ANTXR1/EFEMP2/LTBP3/GAS6/SOX9/MFAP4/FBLN5	11
BP	GO:0050853	B cell receptor signaling pathway	21/1228	131/18723	0.00012155	0.00144797	0.00100857	KLHL6/CTLA4/ITK/MS4A1/PTPRC/CD79A/BTK/PTPN22/NCKAP1L/NFAM1/CD19/PRKCB/LAT2/PTPN6/BANK1/RFTN1/LCK/PIK3CD/CMTM3/BAX/NFATC2	21
BP	GO:0097242	amyloid-beta clearance	10/1228	38/18723	0.000123476	0.00146779	0.00102238	ITGB2/IFNGR1/TREM2/TNF/ITGAM/MSR1/LRP1/LRP4/APOE/IGF1R	10
BP	GO:1990266	neutrophil migration	20/1228	122/18723	0.000127617	0.0015138	0.00105442	ITGB2/FCER1G/RAC2/CXCL13/CCL19/CCL21/CCL22/CCL5/TREM1/EDN1/NCKAP1L/ADAM8/XG/CD99/SLIT2/BST1/CD74/CAMK1D/PREX1/PIK3CD	20
BP	GO:0061760	antifungal innate immune response	7/1228	19/18723	0.000128369	0.00151948	0.00105838	RARRES2/CLEC7A/CLEC6A/CLEC4E/CX3CR1/CLEC4D/SPI1	7
BP	GO:0050819	negative regulation of coagulation	12/1228	53/18723	0.000129746	0.00152281	0.0010607	PROS1/PDGFRA/SERPINF2/EDN1/PLAT/PLAU/SERPINE1/ANXA2/SERPINE2/UBASH3B/ADAMTS18/APOE	12
BP	GO:0002287	alpha-beta T cell activation involved in immune response	14/1228	69/18723	0.00012999	0.00152281	0.0010607	BCL6/STAT6/CRACR2A/LEF1/ANXA1/CCL19/BATF/SPN/NFKBID/JAK3/BCL3/TBX21/RARA/PTGER4	14
BP	GO:0002293	alpha-beta T cell differentiation involved in immune response	14/1228	69/18723	0.00012999	0.00152281	0.0010607	BCL6/STAT6/CRACR2A/LEF1/ANXA1/CCL19/BATF/SPN/NFKBID/JAK3/BCL3/TBX21/RARA/PTGER4	14
BP	GO:1901224	positive regulation of NIK/NF-kappaB signaling	14/1228	69/18723	0.00012999	0.00152281	0.0010607	LAPTM5/CD14/HAVCR2/CCL19/TREM2/TNF/EDN1/SASH1/GREM1/EDAR/ILK/TRADD/NMI/SPHK1	14
BP	GO:1901214	regulation of neuron death	39/1228	319/18723	0.000130012	0.00152281	0.0010607	ITGB2/C1QA/ERBB3/PTK2B/TGFB3/TYROBP/CCL5/SERPINF1/TP53/NAIP/LGMN/CX3CR1/TREM2/TNF/ITGAM/CSF1/TFAP2B/FOXQ1/CORO1A/ADAM8/BAD/TRAF2/LRP1/WFS1/EGR1/TRPM2/FYN/SOD2/NFATC4/CTSZ/VSTM2L/KCNB1/ILK/SORL1/TNFRSF1B/AXL/APOE/BAX/SARM1	39
BP	GO:0071456	cellular response to hypoxia	23/1228	151/18723	0.000131355	0.00153532	0.00106941	S100B/PTN/ICAM1/TP53/STC2/TREM2/EDN1/ZFP36L1/SLC29A1/PMAIP1/VASN/ADAM8/SFRP1/BAD/LMNA/EGR1/BNIP3L/PTGIS/MYC/PTGS2/NOL3/SIRT2/PRKAA1	23
BP	GO:0033622	integrin activation	8/1228	25/18723	0.000132259	0.00153624	0.00107006	FN1/CXCL13/PLEK/SELP/CXCL12/FERMT3/SKAP1/PTGER4	8
BP	GO:0090382	phagosome maturation	8/1228	25/18723	0.000132259	0.00153624	0.00107006	RAB38/RAB31/CORO1A/SYT7/SRPX/RAB32/RAB20/RAB34	8
BP	GO:1904996	positive regulation of leukocyte adhesion to vascular endothelial cell	8/1228	25/18723	0.000132259	0.00153624	0.00107006	ITGB2/ICAM1/TNF/ITGA4/SELP/PTAFR/ALOX5/ST3GAL4	8
BP	GO:0030199	collagen fibril organization	13/1228	61/18723	0.000132972	0.00154131	0.00107359	LOX/DPT/SERPINF2/FKBP10/CRTAP/EFEMP2/AEBP1/COL12A1/ANXA2/GREM1/COL14A1/MMP11/P3H4	13
BP	GO:0003002	regionalization	40/1228	331/18723	0.000137801	0.00159398	0.00111027	TP63/ACVR1/NRP2/C1QA/WLS/SOSTDC1/LEF1/TP53/MEOX1/BHLHE40/EDN1/ITGAM/HOXC9/SMAD3/SNAI1/FOXF1/MESP2/MDFI/LFNG/HHEX/SFRP1/EGR2/MED12/GPC3/BHLHE41/WNT7B/AHI1/GREM1/MAFB/LRP4/HES4/SPRY1/FOXJ1/AXIN2/HOXB2/BASP1/MESP1/GSC/NR2F2/FOXA1	40
BP	GO:0006898	receptor-mediated endocytosis	32/1228	244/18723	0.000140746	0.00162469	0.00113166	ITGB2/FCER1G/CD14/CCL19/CCL21/CTSL/MRC1/SIGLEC1/DAB2/ITGAM/INPP5F/MSR1/SERPINE1/RAMP3/ITGA4/FLOT1/RAB31/HIP1/ACKR3/LRP1/MICALL1/USP46/AHI1/ANXA2/GREM1/SNX17/SORL1/APOE/CXCL16/DLG4/RIN3/TGFBR2	32
BP	GO:0043154	negative regulation of cysteine-type endopeptidase activity involved in apoptotic process	15/1228	78/18723	0.000143014	0.0016407	0.00114281	MMP9/TNFAIP8/PLAUR/BCL2L12/NAIP/TNF/LAMP3/GAS6/KLF4/MICAL1/RPS6KA1/IFI6/CD44/PTGS2/NOL3	15
BP	GO:0061045	negative regulation of wound healing	15/1228	78/18723	0.000143014	0.0016407	0.00114281	PROS1/PDGFRA/SERPINF2/TNF/EDN1/PLAT/PLAU/SERPINE1/SMAD3/ALOX5/ANXA2/SERPINE2/UBASH3B/ADAMTS18/APOE	15
BP	GO:1903556	negative regulation of tumor necrosis factor superfamily cytokine production	15/1228	78/18723	0.000143014	0.0016407	0.00114281	SLAMF1/HAVCR2/CD274/TNFAIP3/TREM2/PTPN22/NLRC3/GAS6/PTPN6/TSPO/AKAP8/SIRPA/AXL/BCL3/RARA	15
BP	GO:0006979	response to oxidative stress	50/1228	446/18723	0.000146052	0.00166655	0.00116082	MMP14/UCP2/MMP9/APOD/TXNIP/STAT6/PDGFRA/GPX3/ANXA1/PTK2B/VNN1/TNFAIP3/PTGS1/MMP2/TP53/HYAL1/TREM2/AIF1/EDN1/ANKRD2/ADAM9/BTK/MPV17/SRXN1/GGT7/NCF1/RBPMS/ALOX5/BAD/GPX7/SLC25A24/PDGFRB/SCARA3/TRPM2/KLF4/FYN/SOD2/GJB2/SIRPA/PRDX6/PTGS2/NOL3/SIRT2/AXL/APOE/CYGB/SPHK1/PRKAA1/PDE8A/FBLN5	50
BP	GO:0043300	regulation of leukocyte degranulation	11/1228	46/18723	0.000146162	0.00166655	0.00116082	ITGB2/RAC2/ITGAM/NCKAP1L/FOXF1/PTAFR/GATA2/FGR/SPI1/UNC13D/FES	11
BP	GO:0048701	embryonic cranial skeleton morphogenesis	11/1228	46/18723	0.000146162	0.00166655	0.00116082	MMP14/TBX15/PDGFRA/TGFB3/MMP16/SMAD3/RUNX2/MED12/MTHFD1L/PRRX1/TGFBR2	11
BP	GO:0001767	establishment of lymphocyte polarity	6/1228	14/18723	0.00014939	0.00169299	0.00117924	CCL19/CCL21/TRAF3IP2/CRTAM/FLOT2/DOCK2	6
BP	GO:0045579	positive regulation of B cell differentiation	6/1228	14/18723	0.00014939	0.00169299	0.00117924	MMP14/BTK/NCKAP1L/INPP5D/BAD/IL7	6
BP	GO:0097531	mast cell migration	6/1228	14/18723	0.00014939	0.00169299	0.00117924	RAC2/VEGFC/VEGFB/KIT/PIK3CD/RIN3	6
BP	GO:0046328	regulation of JNK cascade	21/1228	133/18723	0.000151456	0.00171293	0.00119313	SLAMF1/LTBR/GADD45A/CRACR2A/PTK2B/CCL19/CCL21/DUSP10/SERPINF2/TNF/PTPN22/NCF1/SFRP1/TRAF2/WNT7B/EDAR/DAB2IP/TNFRSF19/SIRPA/FZD7/IGF1R	21
BP	GO:0090022	regulation of neutrophil chemotaxis	9/1228	32/18723	0.000154246	0.00174095	0.00121264	RAC2/CCL19/CCL21/EDN1/NCKAP1L/SLIT2/BST1/CD74/CAMK1D	9
BP	GO:0002823	negative regulation of adaptive immune response based on somatic recombination of immune receptors built from immunoglobulin superfamily domains	12/1228	54/18723	0.000156973	0.0017646	0.00122912	SLAMF1/BCL6/HAVCR2/IL1RL1/PTPRC/IL7R/NCKAP1L/AHR/PTPN6/JAK3/FOXJ1/TBX21	12
BP	GO:1902893	regulation of pri-miRNA transcription by RNA polymerase II	12/1228	54/18723	0.000156973	0.0017646	0.00122912	TGFB1/TP53/TNF/SMAD3/GATA2/EGR1/KLF4/NFATC4/ATOH8/SPI1/SMAD1/SOX9	12
BP	GO:0045576	mast cell activation	13/1228	62/18723	0.000158274	0.00177566	0.00123682	S100A13/RAC2/MILR1/BTK/FOXF1/LAT2/GATA2/LAT/KIT/FGR/PIK3CD/UNC13D/FES	13
BP	GO:0031349	positive regulation of defense response	35/1228	278/18723	0.000159252	0.00178305	0.00124197	XRCC5/CLEC7A/CLEC6A/TXK/HAVCR2/CDK19/IL1RL1/ALOX5AP/TGM2/TYROBP/CCL5/ITGA2/TREM2/GPSM3/TNF/BTK/SH2D1A/PQBP1/SERPINE1/CRTAM/TLR8/ADAM8/CTSC/PTGER3/MATR3/FYN/C2CD4B/HCK/SPI1/PTGS2/TRADD/NMI/MED1/PTGER4/OSMR	35
BP	GO:0090630	activation of GTPase activity	19/1228	115/18723	0.000167786	0.00187484	0.0013059	CXCL13/TBC1D2/PTK2B/CCL21/ARHGAP25/TAX1BP3/TBC1D2B/TBC1D10C/DOCK7/ARHGAP29/ARHGAP45/GMIP/EPHA2/TBC1D13/RABGAP1L/CORO1C/TBC1D9/FOXJ1/ABR	19
BP	GO:0002705	positive regulation of leukocyte mediated immunity	21/1228	134/18723	0.000168712	0.00188143	0.00131049	ITGB2/SLAMF1/TGFB1/CD1E/STAT6/CLEC7A/PTPRC/TYROBP/SCIMP/TREM2/TNF/ITGAM/BTK/SH2D1A/SASH3/CRTAM/PTAFR/TRAF2/KIT/SPI1/TBX21	21
BP	GO:0002700	regulation of production of molecular mediator of immune response	24/1228	164/18723	0.000178296	0.00197574	0.00137619	SLAMF1/TGFB1/CD96/BCL6/LAPTM5/CD244/STAT6/CLEC7A/TGFB3/PTPRC/SCIMP/TNF/BTK/SASH3/CD40LG/PTPN22/HK1/TRAF2/KIT/SPON2/CD74/JAK3/TNFRSF1B/TBX21	24
BP	GO:0050818	regulation of coagulation	14/1228	71/18723	0.000179015	0.00197574	0.00137619	PROS1/PDGFRA/SERPINF2/EDN1/PLAT/PLAU/SERPINE1/ST3GAL4/F3/ANXA2/SERPINE2/UBASH3B/ADAMTS18/APOE	14
BP	GO:0010712	regulation of collagen metabolic process	11/1228	47/18723	0.000179631	0.00197574	0.00137619	TGFB1/TGFB3/SERPINF2/ITGA2/CIITA/PDGFRB/RUNX1/LARP6/VIM/CYGB/MFAP4	11
BP	GO:0045646	regulation of erythrocyte differentiation	11/1228	47/18723	0.000179631	0.00197574	0.00137619	ISG15/ZFP36/NCKAP1L/ZFP36L1/GATA2/INPP5D/FAM210B/MAFB/SPI1/MED1/KLF13	11
BP	GO:0002407	dendritic cell chemotaxis	8/1228	26/18723	0.000180119	0.00197574	0.00137619	SLAMF1/CCL19/CCL21/CCL5/CCR5/GAS6/TRPM2/SPI1	8
BP	GO:0050926	regulation of positive chemotaxis	8/1228	26/18723	0.000180119	0.00197574	0.00137619	S1PR1/ITGA2/SMAD3/ANGPT2/VEGFC/CXCL12/VEGFB/F3	8
BP	GO:0097066	response to thyroid hormone	8/1228	26/18723	0.000180119	0.00197574	0.00137619	CTSH/AKR1B1/CTSS/CTSL/KIT/CTSB/ANXA2/MED1	8
BP	GO:1905523	positive regulation of macrophage migration	8/1228	26/18723	0.000180119	0.00197574	0.00137619	SLAMF1/MMP14/RARRES2/CCL5/CX3CR1/TREM2/CSF1/IL34	8
BP	GO:0008544	epidermis development	39/1228	324/18723	0.000180352	0.00197574	0.00137619	TP63/TXNIP/SOSTDC1/IFT74/ANXA1/FGF7/ZFP36/TRIM16/TNF/ADAM9/PPHLN1/ZFP36L1/SNAI1/LAMC2/FOXQ1/APCDD1/ASAH1/WAS/CRABP2/MAFF/SEC24B/PALLD/KLF4/EPHA2/EDAR/AGPAT2/TNFRSF19/LAMA5/LRP4/USH1C/KAZN/TRADD/CDH3/EVPL/SOX9/FLOT2/ALDH3A2/MED1/ETV4	39
BP	GO:0021700	developmental maturation	35/1228	280/18723	0.000183288	0.00200397	0.00139585	AKR1B1/C1QA/S1PR1/PDE3A/CLEC7A/PTK2B/CCL19/CCL21/CDC25B/MMP2/CX3CR1/RAB38/BTK/GATA2/RUNX2/CDKN1A/ZDHHC2/PALM/NPR2/RAB32/RPS6KA2/GREM1/NFATC4/DAB2IP/CLN5/FAM210B/B4GALT5/DCHS1/CDH3/SIRT2/AXL/DLG4/FOXA1/PTH1R/PLXNB1	35
BP	GO:0002577	regulation of antigen processing and presentation	7/1228	20/18723	0.000186348	0.00202554	0.00141087	FGL2/CCL19/CCL21/CD68/TREM2/WAS/CD74	7
BP	GO:0034104	negative regulation of tissue remodeling	7/1228	20/18723	0.000186348	0.00202554	0.00141087	TNFAIP3/GPR137B/INPP5D/SFRP1/GREM1/UBASH3B/TMEM119	7
BP	GO:0045063	T-helper 1 cell differentiation	7/1228	20/18723	0.000186348	0.00202554	0.00141087	STAT6/CRACR2A/LEF1/ANXA1/CCL19/SPN/JAK3	7
BP	GO:0000768	syncytium formation by plasma membrane fusion	12/1228	55/18723	0.000188938	0.00203783	0.00141944	CD53/GDF15/TYROBP/TREM2/ADAM9/FLOT1/MYOF/EHD1/PTGFRN/PLEKHO1/SBNO2/NFATC2	12
BP	GO:0048016	inositol phosphate-mediated signaling	12/1228	55/18723	0.000188938	0.00203783	0.00141944	CLEC7A/LMCD1/TNF/EDN1/NFATC1/CHP2/TBC1D10C/HOMER3/NFATC4/FHL2/HRH1/NFATC2	12
BP	GO:0061614	pri-miRNA transcription by RNA polymerase II	12/1228	55/18723	0.000188938	0.00203783	0.00141944	TGFB1/TP53/TNF/SMAD3/GATA2/EGR1/KLF4/NFATC4/ATOH8/SPI1/SMAD1/SOX9	12
BP	GO:0140253	cell-cell fusion	12/1228	55/18723	0.000188938	0.00203783	0.00141944	CD53/GDF15/TYROBP/TREM2/ADAM9/FLOT1/MYOF/EHD1/PTGFRN/PLEKHO1/SBNO2/NFATC2	12
BP	GO:0031532	actin cytoskeleton reorganization	18/1228	107/18723	0.000195431	0.0021038	0.00146538	HCLS1/S1PR1/PDGFRA/ANXA1/PTK2B/FGF7/PLEK/ANTXR1/EPS8/ARHGDIB/PARVB/PARVG/KIT/TRPM2/HCK/ABI3/FES/ASB2	18
BP	GO:0045429	positive regulation of nitric oxide biosynthetic process	10/1228	40/18723	0.000196363	0.00210977	0.00146954	CLEC7A/ICAM1/PTK2B/AIF1/TNF/EDN1/SMAD3/PTX3/KLF4/PTGS2	10
BP	GO:0046330	positive regulation of JNK cascade	16/1228	89/18723	0.00019838	0.00212735	0.00148179	SLAMF1/LTBR/GADD45A/CRACR2A/PTK2B/CCL19/CCL21/SERPINF2/TNF/NCF1/TRAF2/WNT7B/EDAR/DAB2IP/TNFRSF19/FZD7	16
BP	GO:0031345	negative regulation of cell projection organization	26/1228	186/18723	0.000208456	0.00222691	0.00155113	CCL21/DGUOK/PMP22/INPP5F/TACSTD2/MYLIP/ARHGAP4/GFI1/EFNA1/LRP1/LGALS1/SLIT2/NR2F1/DPYSL3/SPOCK1/SEMA6A/FYN/NFATC4/CAPZB/VIM/CTSZ/LRP4/TSKU/APOE/ABI3/SEMA5A	26
BP	GO:0032535	regulation of cellular component size	44/1228	383/18723	0.000208461	0.00222691	0.00155113	TMSB4X/HCLS1/FN1/ICAM1/FCHSD1/PTK2B/CCL21/PLEK/COTL1/IL7R/EDN1/NCKAP1L/ADD3/CORO1A/LIMK1/CXCL12/CDC42EP2/WAS/ARHGAP4/CRABP2/SCIN/LRP1/EPS8/GNB3/SH3BP1/PDXP/WNT7B/SLIT2/DBN1/SEMA6A/DPYSL2/CAPZB/CDC42EP3/TMSB10/WASF3/HCK/PREX1/TMEM123/ILK/USH1C/APOE/TRPV2/SEMA5A/RIN3	44
BP	GO:0050679	positive regulation of epithelial cell proliferation	28/1228	207/18723	0.000213122	0.00227235	0.00158279	CLDN1/TP63/NRP2/PTN/TNFAIP3/FGF7/OSR2/HYAL1/ITGA4/GATA2/HTRA1/FGFR1/SFRP1/VEGFC/ZNF703/CXCL12/VEGFB/BAD/F3/MYC/GPBAR1/PIK3CD/FZD7/CDH3/SOX9/TNFSF12/MED1/SEMA5A	28
BP	GO:0045862	positive regulation of proteolysis	43/1228	372/18723	0.000214016	0.00227753	0.0015864	MMP14/CTSH/FN1/LAPTM5/CLEC7A/ECSCR/PTK2B/DAB2/LGMN/TREM2/TNF/ADAM9/SMAD3/ANTXR1/PMAIP1/PCOLCE/HIP1/TFAP4/PRSS22/FAS/ADAM8/ADRA2A/BAD/CTSC/CTSD/F3/EFNA1/FBLN1/PCOLCE2/ACER2/ANP32B/FYN/DAB2IP/LCK/MYC/TNFRSF1B/CBFA2T3/SIRT2/APOE/BAX/RCN3/FBXW11/FURIN	43
BP	GO:0051235	maintenance of location	39/1228	327/18723	0.000218387	0.00231963	0.00161572	TMSB4X/PTK2B/CCL19/CCL21/ABCA1/PTPRC/CCR5/TREM2/NFKBIE/TNF/MSR1/SRGN/ARL2/CLIC2/CD19/ABHD5/MDFI/CORO1A/HK1/CPT1A/EHD1/SCIN/PTPN6/TSPO/CDS1/DBN1/ABCG1/TRPM2/ENPP1/TMSB10/DZIP1/LCK/UBASH3B/SORL1/NOL3/APOE/BAX/FTL/HEXB	39
BP	GO:1903053	regulation of extracellular matrix organization	11/1228	48/18723	0.000219376	0.00232132	0.00161689	TGFB1/PDPN/SMAD3/ANTXR1/FSCN1/EFEMP2/AEBP1/LRP1/RUNX1/TNFRSF1B/SOX9	11
BP	GO:2001238	positive regulation of extrinsic apoptotic signaling pathway	11/1228	48/18723	0.000219376	0.00232132	0.00161689	PDIA3/LTBR/PTPRC/TNF/PMAIP1/SFRP1/SRPX/TRAF2/PEA15/TIMP3/TNFSF12	11
BP	GO:0010952	positive regulation of peptidase activity	27/1228	197/18723	0.000220771	0.00233166	0.0016241	CTSH/FN1/LAPTM5/CLEC7A/LGMN/TNF/SMAD3/ANTXR1/PMAIP1/PCOLCE/HIP1/TFAP4/PRSS22/FAS/BAD/CTSD/F3/EFNA1/FBLN1/PCOLCE2/ACER2/ANP32B/FYN/LCK/MYC/BAX/RCN3	27
BP	GO:0048247	lymphocyte chemotaxis	13/1228	64/18723	0.00022148	0.0023323	0.00162454	CXCR3/CXCL13/PTK2B/CCL19/CCL21/CCL22/CCL5/CH25H/ADAM8/GAS6/PADI2/PIK3CD/CXCL16	13
BP	GO:0048144	fibroblast proliferation	15/1228	81/18723	0.000221667	0.0023323	0.00162454	FN1/PDGFRA/TP53/CDKN1A/NLRC3/SFRP1/GAS6/WNT7B/CD74/PDGFRB/ANXA2/DAB2IP/MYC/BAX/SPHK1	15
BP	GO:0032602	chemokine production	17/1228	99/18723	0.000225922	0.00236759	0.00164912	APOD/ACKR1/CLEC7A/HAVCR2/IL1RL1/SNAI2/TREM2/TREM1/AIF1/TNF/LRP1/CD74/EGR1/KLF4/EPHA2/SIRPA/IL7	17
BP	GO:0010518	positive regulation of phospholipase activity	12/1228	56/18723	0.000226292	0.00236759	0.00164912	TXK/PDGFRA/ITK/EDNRA/CCL5/PTAFR/FGFR1/KIT/PDGFRB/GNA15/S1PR4/PLCB2	12
BP	GO:0048008	platelet-derived growth factor receptor signaling pathway	12/1228	56/18723	0.000226292	0.00236759	0.00164912	APOD/TXNIP/PDGFRA/LOX/PLAT/ARID5B/HIP1/SGPL1/F3/PTPN12/LRP1/PDGFRB	12
BP	GO:0070664	negative regulation of leukocyte proliferation	16/1228	90/18723	0.000226821	0.00236869	0.00164989	CTLA4/HAVCR2/CD274/TNFAIP3/TYROBP/SPN/BTK/PDCD1LG2/CRTAM/BTN2A2/INPP5D/PTPN6/GREM1/IL2RA/SDC4/FOXJ1	16
BP	GO:0048251	elastic fiber assembly	5/1228	10/18723	0.000229634	0.0023936	0.00166724	LOX/EFEMP2/LTBP3/MFAP4/FBLN5	5
BP	GO:0051960	regulation of nervous system development	49/1228	443/18723	0.000233338	0.00242767	0.00169097	TGFB1/S100B/FN1/XRCC5/PTN/AMIGO2/TGM2/DUSP10/SERPINF1/TP53/CX3CR1/BHLHE40/TREM2/TNF/PLXNC1/ITGAX/LIMK1/HOOK3/VEGFC/CXCL12/EGR2/CTSC/SRPX2/DOCK7/ARHGAP4/CRABP2/LRP1/BHLHE41/TSPO/KIT/SLIT2/DBN1/SEMA6A/THBS2/NFATC4/WASF3/SERPINE2/LRP4/ILK/SORL1/TNFRSF1B/IL34/SIRT2/NLGN2/TRPV2/RARA/SEMA5A/TPPP/PLXNB1	49
BP	GO:0098760	response to interleukin-7	6/1228	15/18723	0.000235189	0.00243634	0.00169701	PDIA3/IL7R/BTK/IL2RG/LSP1/GIPC1	6
BP	GO:0098761	cellular response to interleukin-7	6/1228	15/18723	0.000235189	0.00243634	0.00169701	PDIA3/IL7R/BTK/IL2RG/LSP1/GIPC1	6
BP	GO:0007254	JNK cascade	24/1228	167/18723	0.000235915	0.00243634	0.00169701	SLAMF1/LTBR/GADD45A/CRACR2A/PTK2B/CCL19/CCL21/DUSP10/SERPINF2/TNF/PTPN22/SMAD3/NCF1/SFRP1/ARHGEF6/TRAF2/WNT7B/EDAR/DAB2IP/TNFRSF19/SIRPA/FZD7/PTGER4/IGF1R	24
BP	GO:0031960	response to corticosteroid	24/1228	167/18723	0.000235915	0.00243634	0.00169701	CLDN1/S100B/HNMT/ICAM1/ANXA1/IL1RN/ZFP36/SERPINF1/AIF1/TNF/EDN1/ADAM9/ZFP36L1/ZFP36L2/PTAFR/CDKN1A/TFAP4/BAD/WNT7B/SLIT2/GJB2/PTGS2/SLIT3/GLB1	24
BP	GO:2000377	regulation of reactive oxygen species metabolic process	23/1228	157/18723	0.000237146	0.00244453	0.00170272	ITGB2/TGFB1/GADD45A/RAC2/CLEC7A/PTK2B/BCO2/TYROBP/TP53/GNAI2/TNF/ITGAM/MPV17/CDKN1A/ALOX5/TSPO/BST1/PDGFRB/FYN/SOD2/SIRT2/FBLN5/TGFBR2	23
BP	GO:0031099	regeneration	27/1228	198/18723	0.000240011	0.002465	0.00171697	UCP2/APOD/CLDN1/PTN/TXK/ANXA1/DUSP10/INPP5F/ANGPT2/CDKN1A/CXCL12/CPT1A/GAS6/PTGFRN/PTPN12/LRP1/TSPO/KLF4/PTPN3/RUNX1/SULF2/PRRX1/FZD7/AXL/KLK6/MED1/TGFBR2	27
BP	GO:0002719	negative regulation of cytokine production involved in immune response	8/1228	27/18723	0.000241338	0.002465	0.00171697	SLAMF1/TGFB1/CD96/BCL6/TGFB3/TNF/JAK3/TBX21	8
BP	GO:0010758	regulation of macrophage chemotaxis	8/1228	27/18723	0.000241338	0.002465	0.00171697	SLAMF1/RARRES2/PTK2B/CCL5/CSF1/MTUS1/IL34/MMP28	8
BP	GO:0032967	positive regulation of collagen biosynthetic process	8/1228	27/18723	0.000241338	0.002465	0.00171697	TGFB1/TGFB3/SERPINF2/ITGA2/PDGFRB/RUNX1/LARP6/VIM	8
BP	GO:0071624	positive regulation of granulocyte chemotaxis	8/1228	27/18723	0.000241338	0.002465	0.00171697	S100A14/RAC2/CCL19/CCL21/EDN1/NCKAP1L/CD74/CAMK1D	8
BP	GO:0061035	regulation of cartilage development	14/1228	73/18723	0.000243217	0.00247965	0.00172718	CTSK/SNAI2/SMAD3/RUNX2/LTBP3/SCIN/GREM1/EFEMP1/SMAD1/MAF/SOX9/AXIN2/RARA/ADAMTS7	14
BP	GO:0050856	regulation of T cell receptor signaling pathway	10/1228	41/18723	0.000244592	0.00248461	0.00173064	LAPTM5/TESPA1/SH2D1A/PTPN22/CARD11/PVRIG/PTPN6/UBASH3A/LCK/DGKZ	10
BP	GO:1904407	positive regulation of nitric oxide metabolic process	10/1228	41/18723	0.000244592	0.00248461	0.00173064	CLEC7A/ICAM1/PTK2B/AIF1/TNF/EDN1/SMAD3/PTX3/KLF4/PTGS2	10
BP	GO:0002456	T cell mediated immunity	18/1228	109/18723	0.000248091	0.00251558	0.00175221	SLAMF1/CTSH/CD1E/MYO1G/ICAM1/PTPRC/IL7R/PRF1/SASH3/NCKAP1L/EMP2/CTSC/TRAF2/WAS/AHR/RFTN1/TNFRSF1B/TBX21	18
BP	GO:1902905	positive regulation of supramolecular fiber organization	28/1228	209/18723	0.00025065	0.00253693	0.00176708	ICAM1/FCHSD1/PTK2B/CCL21/TGFB3/PLEK/SERPINF2/EDN1/ARL2/NCKAP1L/SMAD3/CORO1A/LIMK1/SFRP1/EFEMP2/CDC42EP2/WAS/S100A10/SCIN/PDXP/CDC42EP3/WASF3/HCK/SDC4/FHOD1/APOE/SEMA5A/FES	28
BP	GO:0008625	extrinsic apoptotic signaling pathway via death domain receptors	15/1228	82/18723	0.000255101	0.00257094	0.00179077	ICAM1/TNFAIP3/TNF/SERPINE1/PMAIP1/BAG3/ITPRIP/SFRP1/BAD/PEA15/TIMP3/DAB2IP/SPI1/TRADD/BAX	15
BP	GO:0060395	SMAD protein signal transduction	15/1228	82/18723	0.000255101	0.00257094	0.00179077	TGFB1/NCEH1/BMP3/GDF15/TGFB3/DAB2/SMAD3/RBPMS/LRP1/BTBD11/ATOH8/SMAD9/VIM/SMAD1/INHBB	15
BP	GO:0032743	positive regulation of interleukin-2 production	9/1228	34/18723	0.0002561	0.00257094	0.00179077	CLEC7A/ANXA1/CD3E/PTPRC/SASH3/CD83/CARD11/TRAF2/RUNX1	9
BP	GO:0070232	regulation of T cell apoptotic process	9/1228	34/18723	0.0002561	0.00257094	0.00179077	CD274/CCL5/TP53/IL7R/SLC46A2/ADAM8/TSC22D3/EFNA1/JAK3	9
BP	GO:0007224	smoothened signaling pathway	21/1228	138/18723	0.000256312	0.00257094	0.00179077	EVC2/TMEM17/CD3E/TCTN2/TCTN3/FOXF1/IFT122/RUNX2/GLIS2/SFRP1/GPC3/EVC/ENPP1/DZIP1/SERPINE2/PRRX1/ZNF423/RAB34/KIF7/FOXA1/TGFBR2	21
BP	GO:0060191	regulation of lipase activity	16/1228	91/18723	0.000258731	0.00259055	0.00180443	TXK/PDGFRA/ITK/ANXA1/EDNRA/CCL5/PTAFR/ABHD5/FGFR1/LRP1/KIT/PDGFRB/GNA15/S1PR4/PLCB2/FURIN	16
BP	GO:0003170	heart valve development	13/1228	65/18723	0.000260457	0.00259389	0.00180676	TGFB1/ACVR1/SNAI2/SNAI1/NFATC1/EFNA1/SLIT2/MATR3/DCHS1/TNFRSF1B/SOX9/SLIT3/TGFBR2	13
BP	GO:0038034	signal transduction in absence of ligand	13/1228	65/18723	0.000260457	0.00259389	0.00180676	ERBB3/SNAI2/BCL2A1/TNF/FAS/BAG3/FGFR1/BAD/SRPX/FYN/IFI6/IL7/BAX	13
BP	GO:0097192	extrinsic apoptotic signaling pathway in absence of ligand	13/1228	65/18723	0.000260457	0.00259389	0.00180676	ERBB3/SNAI2/BCL2A1/TNF/FAS/BAG3/FGFR1/BAD/SRPX/FYN/IFI6/IL7/BAX	13
BP	GO:0045655	regulation of monocyte differentiation	7/1228	21/18723	0.000263769	0.00261754	0.00182323	CSF1/ZFP36L1/INPP5D/CD74/MYC/IL34/FES	7
BP	GO:0090026	positive regulation of monocyte chemotaxis	7/1228	21/18723	0.000263769	0.00261754	0.00182323	S100A14/CCL5/LGMN/CX3CR1/AIF1/SERPINE1/CXCL12	7
BP	GO:0051480	regulation of cytosolic calcium ion concentration	41/1228	353/18723	0.000268517	0.00265993	0.00185276	CXCR3/S1PR1/PDGFRA/CXCL13/PTK2B/CCL19/CCL21/F2RL2/TGM2/MS4A1/PTPRC/EDNRA/CX3CR1/CCR8/CCRL2/CCR5/EDN1/CLIC2/RAMP3/SMAD3/CD19/GATA2/GPR35/CORO1A/ACKR3/PTGER3/TRPV6/LRP1/PTPN6/GNA15/S1PR4/TRPM2/FYN/LCK/UBASH3B/NOL3/BAX/DLG4/TRPV2/PTGER4/PTH1R	41
BP	GO:0006949	syncytium formation	12/1228	57/18723	0.000269748	0.00266741	0.00185796	CD53/GDF15/TYROBP/TREM2/ADAM9/FLOT1/MYOF/EHD1/PTGFRN/PLEKHO1/SBNO2/NFATC2	12
BP	GO:0009743	response to carbohydrate	32/1228	253/18723	0.000274491	0.00270473	0.00188395	UCP2/TXNIP/KRT18/CLEC7A/ICAM1/PTK2B/SERPINF1/MAP2K6/ITGA2/TREM2/ZFP36L1/OXCT1/PRKCB/ANGPT2/SLC29A1/COLEC12/ADRA2A/BAD/GAS6/LRP1/LGALS1/EGR1/ABCG1/SOD2/RPS6KA2/IRS2/KCNB1/PTGS2/SARM1/PRKAA1/IGF1R/TGFBR2	32
BP	GO:0060828	regulation of canonical Wnt signaling pathway	32/1228	253/18723	0.000274491	0.00270473	0.00188395	IGFBP4/TGFB1/WLS/SOSTDC1/SNAI2/PLEKHA4/DAB2/SFRP5/SMAD3/HHEX/SFRP1/ZNF703/BICC1/FZD4/FRMD8/GPC3/EGR1/WNK2/GREM1/DAB2IP/SULF2/LRP4/ILK/DKK3/FZD7/CDH3/ZEB2/APOE/SOX9/AXIN2/SEMA5A/MESP1	32
BP	GO:0006801	superoxide metabolic process	14/1228	74/18723	0.000282133	0.00277514	0.001933	ITGB2/TGFB1/CLEC7A/NCF2/TYROBP/GNAI2/EDN1/ITGAM/NCF1/BST1/SOD2/PREX1/SH3PXD2B/FBLN5	14
BP	GO:1903829	positive regulation of cellular protein localization	34/1228	276/18723	0.000296353	0.00290988	0.00202686	ITGB2/TGFB1/HCLS1/PTN/RAC2/UBL5/RNF31/TYROBP/TREM2/CENPQ/TNF/ITGAM/GPR137B/RAMP3/SMAD3/CD247/GLIS2/CHP2/BAG3/ZDHHC2/DKC1/LRP1/SQSTM1/FYN/EPHA2/KCNB1/MFF/LRP4/SORL1/UBE2J2/PTGS2/USP36/PPP1R9B/PRKAA1	34
BP	GO:0032689	negative regulation of interferon-gamma production	10/1228	42/18723	0.000302357	0.00295045	0.00205511	SLAMF1/CD96/LAPTM5/HAVCR2/CD274/IL1RL1/PDCD1LG2/GAS6/AXL/RARA	10
BP	GO:0032965	regulation of collagen biosynthetic process	10/1228	42/18723	0.000302357	0.00295045	0.00205511	TGFB1/TGFB3/SERPINF2/ITGA2/CIITA/PDGFRB/RUNX1/LARP6/VIM/CYGB	10
BP	GO:1902895	positive regulation of pri-miRNA transcription by RNA polymerase II	10/1228	42/18723	0.000302357	0.00295045	0.00205511	TGFB1/TP53/TNF/SMAD3/GATA2/EGR1/KLF4/ATOH8/SPI1/SMAD1	10
BP	GO:0000302	response to reactive oxygen species	29/1228	222/18723	0.000302597	0.00295045	0.00205511	UCP2/MMP9/APOD/TXNIP/STAT6/PDGFRA/ANXA1/PTK2B/TNFAIP3/MMP2/HYAL1/EDN1/ADAM9/BTK/MPV17/NCF1/BAD/PDGFRB/TRPM2/KLF4/FYN/SOD2/SIRPA/AXL/APOE/SPHK1/PRKAA1/PDE8A/FBLN5	29
BP	GO:0006874	cellular calcium ion homeostasis	49/1228	448/18723	0.000303425	0.00295337	0.00205715	CXCR3/S1PR1/PDGFRA/CXCL13/PTK2B/CCL19/CCL21/F2RL2/TGM2/MS4A1/PTPRC/EDNRA/CCL5/STC2/CX3CR1/CCR8/CCRL2/CCR5/EDN1/CLIC2/RAMP3/SMAD3/CD19/PRKCB/GATA2/GPR35/CORO1A/ACKR3/CXCL12/PTGER3/TRPV6/LRP1/PTPN6/MCUB/WFS1/GNA15/S1PR4/TRPM2/FYN/LCK/UBASH3B/NOL3/APOE/BAX/DLG4/TRPV2/PTGER4/HEXB/PTH1R	49
BP	GO:0032715	negative regulation of interleukin-6 production	13/1228	66/18723	0.000305146	0.00295981	0.00206163	SLAMF1/HAVCR2/TNFAIP3/TNF/PTPN22/NCKAP1L/NLRC3/INPP5D/GAS6/PTPN6/BANK1/SIRPA/FOXJ1	13
BP	GO:0050918	positive chemotaxis	13/1228	66/18723	0.000305146	0.00295981	0.00206163	S1PR1/FGF7/CCL5/ITGA2/SMAD3/ANGPT2/CORO1A/VEGFC/CXCL12/VEGFB/F3/LRP1/SEMA5A	13
BP	GO:0002675	positive regulation of acute inflammatory response	8/1228	28/18723	0.00031859	0.00305935	0.00213097	ALOX5AP/TNF/BTK/ADAM8/PTGER3/C2CD4B/PTGS2/OSMR	8
BP	GO:0010464	regulation of mesenchymal cell proliferation	8/1228	28/18723	0.00031859	0.00305935	0.00213097	PTN/FOXF1/LMNA/IRS2/MYC/PRRX1/SOX9/TGFBR2	8
BP	GO:0010714	positive regulation of collagen metabolic process	8/1228	28/18723	0.00031859	0.00305935	0.00213097	TGFB1/TGFB3/SERPINF2/ITGA2/PDGFRB/RUNX1/LARP6/VIM	8
BP	GO:0032801	receptor catabolic process	8/1228	28/18723	0.00031859	0.00305935	0.00213097	TGFB1/LAPTM5/LGMN/MYLIP/CAPN1/ANXA2/APOE/FURIN	8
BP	GO:0060325	face morphogenesis	8/1228	28/18723	0.00031859	0.00305935	0.00213097	LEF1/PDGFRA/TGFB3/CRISPLD2/MMP2/ARID5B/SGPL1/CLDN5	8
BP	GO:0030041	actin filament polymerization	26/1228	191/18723	0.00031893	0.00305935	0.00213097	TMSB4X/HCLS1/ICAM1/FCHSD1/PTK2B/CCL21/COTL1/PSTPIP1/AIF1/PSTPIP2/NCKAP1L/ADD3/CORO1A/CDC42EP2/WAS/SCIN/EPS8/SLIT2/DBN1/CAPZB/CDC42EP3/TMSB10/WASF3/HCK/PREX1/GAS7	26
BP	GO:0001954	positive regulation of cell-matrix adhesion	12/1228	58/18723	0.000320089	0.00305935	0.00213097	PTK2B/CCL21/CD3E/CSF1/SMAD3/EMP2/SFRP1/EFEMP2/S100A10/SDC4/ILK/SKAP1	12
BP	GO:0043506	regulation of JUN kinase activity	12/1228	58/18723	0.000320089	0.00305935	0.00213097	PTK2B/CCL19/DUSP10/TNF/EDN1/PTPN22/SFRP1/FZD4/TRAF2/DVL3/SASH1/DAB2IP	12
BP	GO:0045058	T cell selection	11/1228	50/18723	0.000321432	0.00305935	0.00213097	STAT6/CTSL/BATF/CD3E/CD3D/PTPRC/SPN/CARD11/CD74/TBX21/DOCK2	11
BP	GO:0060425	lung morphogenesis	11/1228	50/18723	0.000321432	0.00305935	0.00213097	CTSH/FGF7/TNF/FOXF1/WNT7B/SEC24B/CTSZ/SPRY1/SOX9/FOXA1/TGFBR2	11
BP	GO:1902930	regulation of alcohol biosynthetic process	11/1228	50/18723	0.000321432	0.00305935	0.00213097	CD244/PTK2B/PLEK/PTAFR/GFI1/ABCG1/DKK3/APOE/PRKAA1/PTH1R/HRH1	11
BP	GO:2000403	positive regulation of lymphocyte migration	9/1228	35/18723	0.000324872	0.00308683	0.00215011	CXCL13/PTK2B/CCL21/CCL5/AIF1/SPN/ITGA4/ADAM8/CXCL12	9
BP	GO:0032677	regulation of interleukin-8 production	17/1228	102/18723	0.000326167	0.00309388	0.00215502	CHI3L1/TMSB4X/CD244/CLEC7A/CD14/ANXA1/PTPRC/TNF/SERPINE1/PTPN22/TLR8/AFAP1L2/F3/CD74/KLF4/IL17D/BCL3	17
BP	GO:0048706	embryonic skeletal system development	19/1228	121/18723	0.000329642	0.00312154	0.00217428	MMP14/TBX15/PDGFRA/TGFB3/SULF1/OSR2/MMP16/HYAL1/HOXC9/SMAD3/RUNX2/MDFI/MED12/MTHFD1L/SULF2/PRRX1/HOXB2/GSC/TGFBR2	19
BP	GO:0017157	regulation of exocytosis	27/1228	202/18723	0.000332677	0.00314495	0.00219059	ITGB2/RAC2/ANXA1/GNAI2/ITGAM/NCKAP1L/FOXF1/PTAFR/PRKCB/GATA2/RAB27B/ADRA2A/SYT7/SYT8/TRPV6/GIPC1/MICAL1/FGR/SDC4/KCNB1/ATP9A/SPI1/SYT13/UNC13D/DOC2B/FES/STX1A	27
BP	GO:0033273	response to vitamin	16/1228	93/18723	0.000334356	0.00315549	0.00219793	KYNU/PTN/SNAI2/FOLR2/STC2/ITGA2/SFRP1/GAS6/TSPO/KANK2/SOD2/PTGS2/SRSF2/MED1/RARA/FES	16
BP	GO:0031667	response to nutrient levels	51/1228	474/18723	0.00034145	0.003217	0.00224077	RARRES2/UCP2/KYNU/PDK4/PTN/AOC1/KRT18/NUAK1/GDF15/ICAM1/ABCA1/SNAI2/MMP7/CD3E/FOLR2/ZFP36/CD68/TP53/STC2/ITGA2/GNAI2/C2/OXCT1/EHMT2/CDKN1A/PMAIP1/FOXK1/FAS/SFRP1/CPT1A/GAS6/TSPO/KANK2/CDKN2B/SOD2/SLC22A3/DNAJC15/KCNB1/KLF10/SORL1/PTGS2/INHBB/RALB/SIRT2/APOE/SRSF2/MED1/RARA/PRKAA1/FES/TGFBR2	51
BP	GO:0036294	cellular response to decreased oxygen levels	23/1228	161/18723	0.00034407	0.00323622	0.00225417	S100B/PTN/ICAM1/TP53/STC2/TREM2/EDN1/ZFP36L1/SLC29A1/PMAIP1/VASN/ADAM8/SFRP1/BAD/LMNA/EGR1/BNIP3L/PTGIS/MYC/PTGS2/NOL3/SIRT2/PRKAA1	23
BP	GO:0002821	positive regulation of adaptive immune response	18/1228	112/18723	0.000350175	0.00328811	0.00229031	SLAMF1/TGFB1/CD1E/STAT6/CLEC7A/CLEC6A/CD274/PLA2G4A/PTPRC/TREM2/TNF/BTK/SASH3/NFKBID/TRAF2/TNFSF13B/SKAP1/TBX21	18
BP	GO:0010919	regulation of inositol phosphate biosynthetic process	6/1228	16/18723	0.000355479	0.00332118	0.00231334	CD244/PTK2B/PLEK/PTAFR/PTH1R/HRH1	6
BP	GO:1903236	regulation of leukocyte tethering or rolling	6/1228	16/18723	0.000355479	0.00332118	0.00231334	CCL21/ITGA4/SELP/PTAFR/CXCL12/ST3GAL4	6
BP	GO:2001267	regulation of cysteine-type endopeptidase activity involved in apoptotic signaling pathway	6/1228	16/18723	0.000355479	0.00332118	0.00231334	MMP9/PLAUR/SMAD3/TFAP4/FAS/BAX	6
BP	GO:2000514	regulation of CD4-positive, alpha-beta T cell activation	13/1228	67/18723	0.000356209	0.00332244	0.00231422	BCL6/CD274/ANXA1/CCL19/SASH3/NCKAP1L/NFKBID/CD83/JAK3/RUNX1/TBX21/RARA/TGFBR2	13
BP	GO:0031668	cellular response to extracellular stimulus	31/1228	246/18723	0.000362078	0.00337155	0.00234842	UCP2/PDK4/PTN/AOC1/NUAK1/ICAM1/SNAI2/FOLR2/PTPRC/CD68/TP53/AIF1/ITGA4/EHMT2/CDKN1A/PMAIP1/FAS/SFRP1/GAS6/KANK2/CDKN2B/DNAJC15/KCNB1/KLF10/INHBB/RALB/AXL/PPP1R9B/MED1/PRKAA1/FES	31
BP	GO:0050860	negative regulation of T cell receptor signaling pathway	7/1228	22/18723	0.000365081	0.00339386	0.00236396	LAPTM5/SH2D1A/PTPN22/PVRIG/PTPN6/UBASH3A/DGKZ	7
BP	GO:0030593	neutrophil chemotaxis	17/1228	103/18723	0.000367205	0.00340228	0.00236983	ITGB2/FCER1G/RAC2/CXCL13/CCL19/CCL21/CCL22/CCL5/TREM1/EDN1/NCKAP1L/SLIT2/BST1/CD74/CAMK1D/PREX1/PIK3CD	17
BP	GO:0032637	interleukin-8 production	17/1228	103/18723	0.000367205	0.00340228	0.00236983	CHI3L1/TMSB4X/CD244/CLEC7A/CD14/ANXA1/PTPRC/TNF/SERPINE1/PTPN22/TLR8/AFAP1L2/F3/CD74/KLF4/IL17D/BCL3	17
BP	GO:0010171	body morphogenesis	10/1228	43/18723	0.000371083	0.00342119	0.002383	LEF1/PDGFRA/TGFB3/CRISPLD2/MMP2/ARID5B/IFT122/SGPL1/GPC3/CLDN5	10
BP	GO:0033173	calcineurin-NFAT signaling cascade	10/1228	43/18723	0.000371083	0.00342119	0.002383	CLEC7A/LMCD1/TNF/NFATC1/CHP2/TBC1D10C/HOMER3/NFATC4/FHL2/NFATC2	10
BP	GO:0060443	mammary gland morphogenesis	10/1228	43/18723	0.000371083	0.00342119	0.002383	SOSTDC1/STAT6/CSF1/CAPN1/EPHA2/ELF3/BAX/TBX2/MED1/TGFBR2	10
BP	GO:0007565	female pregnancy	26/1228	193/18723	0.000375905	0.0034455	0.00239994	UCP2/MMP9/AKR1B1/TIMP1/PTN/JUNB/HAVCR2/TGFB3/MMP7/MMP2/STC2/ITGA2/ANGPT2/EMP2/ARHGDIB/FBLN1/CTSB/HPGD/GJB2/PTGS2/ITGB4/VMP1/MED1/RARA/NR2F2/TGFBR2	26
BP	GO:0006809	nitric oxide biosynthetic process	14/1228	76/18723	0.000376187	0.0034455	0.00239994	CLEC7A/ICAM1/PTK2B/CX3CR1/AIF1/TNF/EDN1/SMAD3/PTX3/TSPO/KLF4/SIRPA/PTGIS/PTGS2	14
BP	GO:0032720	negative regulation of tumor necrosis factor production	14/1228	76/18723	0.000376187	0.0034455	0.00239994	SLAMF1/HAVCR2/TNFAIP3/TREM2/PTPN22/NLRC3/GAS6/PTPN6/TSPO/AKAP8/SIRPA/AXL/BCL3/RARA	14
BP	GO:2000379	positive regulation of reactive oxygen species metabolic process	14/1228	76/18723	0.000376187	0.0034455	0.00239994	ITGB2/TGFB1/GADD45A/CLEC7A/PTK2B/TYROBP/TP53/GNAI2/ITGAM/CDKN1A/TSPO/PDGFRB/SOD2/TGFBR2	14
BP	GO:0001836	release of cytochrome c from mitochondria	12/1228	59/18723	0.000378164	0.00345229	0.00240466	MMP9/PLAUR/TP53/PMAIP1/BAD/LMNA/SOD2/IFI6/MFF/NOL3/BAX/PLSCR3	12
BP	GO:0048010	vascular endothelial growth factor receptor signaling pathway	12/1228	59/18723	0.000378164	0.00345229	0.00240466	PTK2B/SULF1/CLEC14A/PRKCB/HHEX/VEGFC/VEGFB/FZD4/ITGA5/FYN/DAB2IP/AXL	12
BP	GO:0001738	morphogenesis of a polarized epithelium	16/1228	94/18723	0.000378839	0.00345281	0.00240503	TP63/GPC6/PLEKHA4/DAB2/FOXF1/SFRP1/MED12/GPC3/DVL3/SH3BP1/SEC24B/AHI1/NPHP1/LAMA5/FZD7/FZD2	16
BP	GO:0016485	protein processing	29/1228	225/18723	0.000379538	0.00345355	0.00240554	MMP14/CTSH/CPA3/CTSS/C1R/CTSL/MMP16/BCL2L12/SERPINF2/LGMN/CPXM2/PLAT/SRGN/PLAU/SERPINE1/ADAM8/INPP5B/BAD/F3/CPM/RUNX1/RPS6KA2/CLN5/CPXM1/CTSZ/SERPINE2/NOL3/KLK6/FURIN	29
BP	GO:0001656	metanephros development	15/1228	85/18723	0.000382745	0.00347142	0.00241799	CTSH/AKR1B1/PDGFRA/OSR2/TFAP2B/GPC3/WNT7B/PDGFRB/EGR1/GREM1/MYC/SPRY1/FOXJ1/SOX9/BASP1	15
BP	GO:0060021	roof of mouth development	15/1228	85/18723	0.000382745	0.00347142	0.00241799	LEF1/PDGFRA/TGFB3/OSR2/ARID5B/SNAI1/MMP25/SGPL1/CLDN5/ANP32B/MSC/PRRX1/TBX2/FZD2/TGFBR2	15
BP	GO:0043370	regulation of CD4-positive, alpha-beta T cell differentiation	11/1228	51/18723	0.000385845	0.00349387	0.00243363	BCL6/ANXA1/CCL19/SASH3/NCKAP1L/NFKBID/CD83/JAK3/RUNX1/TBX21/RARA	11
BP	GO:0045936	negative regulation of phosphate metabolic process	48/1228	441/18723	0.000388637	0.00351345	0.00244727	TGFB1/IGFBP3/SAMSN1/GADD45A/GPRC5A/TNFAIP3/PLEK/DUSP10/PTPRC/TP53/GNAI2/TNF/INPP5F/PTPN22/NCKAP1L/CDKN1A/TFAP4/HHEX/SFRP1/DUSP6/LRP1/PTPN6/FBLN1/SLIT2/CDKN2B/MICAL1/CNKSR3/ENPP1/GREM1/DAB2IP/IRS2/SIRPA/PMEPA1/ILK/UBASH3B/SORL1/LAX1/PIK3IP1/CORO1C/SPRY1/CBFA2T3/SIRT2/APOE/BAX/SOCS3/PPP1R9B/PPP1R1B/NR2F2	48
BP	GO:0002357	defense response to tumor cell	5/1228	11/18723	0.000398262	0.00356014	0.00247979	LAPTM5/PRF1/KLF4/SPI1/ABI3	5
BP	GO:0002604	regulation of dendritic cell antigen processing and presentation	5/1228	11/18723	0.000398262	0.00356014	0.00247979	FGL2/CCL19/CCL21/CD68/CD74	5
BP	GO:0045657	positive regulation of monocyte differentiation	5/1228	11/18723	0.000398262	0.00356014	0.00247979	CSF1/ZFP36L1/CD74/IL34/FES	5
BP	GO:0072497	mesenchymal stem cell differentiation	5/1228	11/18723	0.000398262	0.00356014	0.00247979	KRT18/PDGFRA/LTBP3/FZD1/SOX9	5
BP	GO:0097048	dendritic cell apoptotic process	5/1228	11/18723	0.000398262	0.00356014	0.00247979	CCL19/CCL21/CXCL12/GAS6/AXL	5
BP	GO:2000644	regulation of receptor catabolic process	5/1228	11/18723	0.000398262	0.00356014	0.00247979	LAPTM5/MYLIP/ANXA2/APOE/FURIN	5
BP	GO:2000668	regulation of dendritic cell apoptotic process	5/1228	11/18723	0.000398262	0.00356014	0.00247979	CCL19/CCL21/CXCL12/GAS6/AXL	5
BP	GO:0062197	NA	39/1228	337/18723	0.000402635	0.00359349	0.00250302	MMP9/AKR1B1/XRCC5/STAT6/PDGFRA/ANXA1/VNN1/TNFAIP3/MMP2/TP53/TREM2/AIF1/ANKRD2/BTK/ZFP36L1/MPV17/SRXN1/NCF1/FAS/ALOX5/BAD/GPX7/SLC25A24/RCSD1/TSPO/TRPM2/KLF4/FYN/SOD2/GJB2/SIRPA/PTGS2/NOL3/SIRT2/AXL/SPHK1/PRKAA1/PDE8A/FBLN5	39
BP	GO:0010811	positive regulation of cell-substrate adhesion	19/1228	123/18723	0.000407784	0.00362007	0.00252153	FN1/PTN/EDIL3/PTK2B/CCL21/CD3E/ARL2/CSF1/SMAD3/FOXF1/EMP2/SFRP1/EFEMP2/S100A10/SDC4/PREX1/ILK/UNC13D/SKAP1	19
BP	GO:0030224	monocyte differentiation	9/1228	36/18723	0.000408205	0.00362007	0.00252153	CSF1/ZFP36L1/INPP5D/PDE1B/CD74/MYC/IL34/MED1/FES	9
BP	GO:0042092	type 2 immune response	9/1228	36/18723	0.000408205	0.00362007	0.00252153	BCL6/STAT6/ANXA1/TRAF3IP2/BATF/CD74/BCL3/TBX21/RARA	9
BP	GO:0042119	neutrophil activation	9/1228	36/18723	0.000408205	0.00362007	0.00252153	ITGB2/FCER1G/TRAF3IP2/TYROBP/CCL5/ITGAM/PTAFR/PREX1/SPI1	9
BP	GO:0010563	negative regulation of phosphorus metabolic process	48/1228	442/18723	0.000409033	0.00362166	0.00252264	TGFB1/IGFBP3/SAMSN1/GADD45A/GPRC5A/TNFAIP3/PLEK/DUSP10/PTPRC/TP53/GNAI2/TNF/INPP5F/PTPN22/NCKAP1L/CDKN1A/TFAP4/HHEX/SFRP1/DUSP6/LRP1/PTPN6/FBLN1/SLIT2/CDKN2B/MICAL1/CNKSR3/ENPP1/GREM1/DAB2IP/IRS2/SIRPA/PMEPA1/ILK/UBASH3B/SORL1/LAX1/PIK3IP1/CORO1C/SPRY1/CBFA2T3/SIRT2/APOE/BAX/SOCS3/PPP1R9B/PPP1R1B/NR2F2	48
BP	GO:0031334	positive regulation of protein complex assembly	30/1228	237/18723	0.000414098	0.00365022	0.00254253	TGFB1/CLEC7A/CXCL13/ICAM1/FCHSD1/PTK2B/CCL21/ABCA1/PLEK/ISG15/TP53/TNF/ARL2/NCKAP1L/FNIP2/ATAT1/CORO1A/FSCN1/CDC42EP2/TRABD2B/WAS/SCIN/CDC42EP3/DAB2IP/WASF3/HCK/BAX/SKAP1/TPPP/FES	30
BP	GO:0046637	regulation of alpha-beta T cell differentiation	13/1228	68/18723	0.000414362	0.00365022	0.00254253	BCL6/ANXA1/CCL19/SASH3/NCKAP1L/NFKBID/ZNF683/CD83/JAK3/RUNX1/TBX21/RARA/TGFBR2	13
BP	GO:1904888	cranial skeletal system development	13/1228	68/18723	0.000414362	0.00365022	0.00254253	MMP14/TP63/TBX15/PDGFRA/TGFB3/MMP16/SMAD3/RUNX2/MED12/MTHFD1L/PRRX1/MSX2/TGFBR2	13
BP	GO:2000406	positive regulation of T cell migration	8/1228	29/18723	0.000414872	0.00365022	0.00254253	CXCL13/CCL21/CCL5/AIF1/SPN/ITGA4/ADAM8/CXCL12	8
BP	GO:0070997	neuron death	41/1228	361/18723	0.000427639	0.00375664	0.00261665	ITGB2/TP63/C1QA/ERBB3/PTK2B/TGFB3/TYROBP/CCL5/SERPINF1/TP53/NAIP/LGMN/CX3CR1/TREM2/TNF/ITGAM/CSF1/TFAP2B/FOXQ1/CORO1A/FAS/ADAM8/BAD/TRAF2/LRP1/WFS1/EGR1/TRPM2/FYN/SOD2/NFATC4/CTSZ/VSTM2L/KCNB1/ILK/SORL1/TNFRSF1B/AXL/APOE/BAX/SARM1	41
BP	GO:0002532	production of molecular mediator involved in inflammatory response	16/1228	95/18723	0.000428324	0.00375675	0.00261673	APOD/CLEC7A/IL17B/ALOX5AP/DUSP10/TREM2/GPSM3/TNF/BTK/SERPINE1/NCF1/NLRC3/ALOX5/IL17D/SIRPA/PLD4	16
BP	GO:0032418	lysosome localization	14/1228	77/18723	0.000432483	0.00378728	0.002638	S100A13/RAC2/MILR1/BTK/FOXF1/LAT2/GATA2/LAT/KIT/FGR/PIK3CD/UNC13D/RAB34/FES	14
BP	GO:0061564	axon development	50/1228	467/18723	0.000435436	0.0038	0.00264686	APOD/S100B/NRP2/FN1/PTN/RAC2/INPP5F/NDN/PLXNC1/ITGA4/LAMC2/FLOT1/EPHB4/LIMK1/CXCL12/EGR2/DOCK7/ARHGAP4/EFNA1/CRABP2/EPHB6/LRP1/TSPO/SLIT2/DBN1/SEMA6A/NOTCH3/MAP1S/PALLD/DPYSL2/TMEFF1/KLF4/FYN/UST/EPHA2/B3GNT2/LAMA5/VSTM2L/B4GALT5/LRP4/TSKU/APBB1/ILK/CDH11/APOE/SCN1B/TRPV2/SLIT3/SEMA5A/PLXNB1	50
BP	GO:0034103	regulation of tissue remodeling	15/1228	86/18723	0.000435976	0.0038	0.00264686	TGFB1/S1PR1/PDK4/TNFAIP3/TP53/GPR137B/INPP5D/ADAM8/SFRP1/LTBP3/SYT7/RUNX1/GREM1/UBASH3B/TMEM119	15
BP	GO:2000117	negative regulation of cysteine-type endopeptidase activity	15/1228	86/18723	0.000435976	0.0038	0.00264686	MMP9/TNFAIP8/PLAUR/BCL2L12/NAIP/TNF/LAMP3/GAS6/KLF4/MICAL1/RPS6KA1/IFI6/CD44/PTGS2/NOL3	15
BP	GO:1903532	positive regulation of secretion by cell	34/1228	282/18723	0.000441202	0.00383955	0.00267441	ITGB2/TGFB1/WLS/TGFB3/PLA2G4A/MAP2K6/TREM2/EDN1/ITGAM/ADAM9/OXCT1/PTAFR/MYRIP/GATA2/RAB27B/ADAM8/VEGFC/CXCL12/BAD/SYT7/LRP1/ABCG1/TRPM2/PTGES/IRS2/FGR/SDC4/KCNB1/APBB1/INHBB/UNC13D/DOC2B/NLGN2/STX1A	34
BP	GO:0009620	response to fungus	12/1228	60/18723	0.000444897	0.00386569	0.00269262	RARRES2/CLEC7A/CLEC6A/CLEC4E/COTL1/SCIMP/CX3CR1/BTK/PTX3/CLEC4D/SPON2/SPI1	12
BP	GO:2001242	regulation of intrinsic apoptotic signaling pathway	23/1228	164/18723	0.000450006	0.00390401	0.00271931	MMP9/VNN1/SNAI2/PLAUR/TP53/TREM2/SNAI1/PMAIP1/ACKR3/SGMS1/CXCL12/BAD/ZNF385A/WFS1/CD74/RNF183/SOD2/LCK/CD44/NOC2L/PTGS2/NOL3/BAX	23
BP	GO:0042554	superoxide anion generation	10/1228	44/18723	0.000452334	0.00391206	0.00272491	ITGB2/TGFB1/CLEC7A/NCF2/TYROBP/GNAI2/EDN1/ITGAM/NCF1/SH3PXD2B	10
BP	GO:0060324	face development	10/1228	44/18723	0.000452334	0.00391206	0.00272491	LEF1/PDGFRA/TGFB3/CRISPLD2/MMP2/ARID5B/SGPL1/CLDN5/RARA/ALDH1A3	10
BP	GO:0046718	viral entry into host cell	21/1228	144/18723	0.000462104	0.00399038	0.00277947	SLAMF1/CLDN1/ICAM1/CD209/CTSL/MRC1/SIGLEC1/ITGA2/CCR5/CIITA/GAS6/ITGA5/ITGB7/PTX3/LGALS1/CD74/CTSB/TRIM14/EPHA2/LY6E/AXL	21
BP	GO:0060193	positive regulation of lipase activity	13/1228	69/18723	0.000480377	0.00414177	0.00288491	TXK/PDGFRA/ITK/EDNRA/CCL5/PTAFR/ABHD5/FGFR1/KIT/PDGFRB/GNA15/S1PR4/PLCB2	13
BP	GO:0030325	adrenal gland development	7/1228	23/18723	0.000495291	0.00426377	0.0029699	PDGFRA/ARID5B/SMAD3/TSPO/FSTL3/LY6E/DKK3	7
BP	GO:0003176	aortic valve development	9/1228	37/18723	0.000508359	0.00434645	0.00302749	TGFB1/SNAI2/SNAI1/NFATC1/EFNA1/SLIT2/TNFRSF1B/SOX9/SLIT3	9
BP	GO:0031646	positive regulation of neurological system process	9/1228	37/18723	0.000508359	0.00434645	0.00302749	S100B/ITGA2/PTAFR/ITGAX/EGR2/WASF3/TNFRSF1B/NLGN2/TPPP	9
BP	GO:0043029	T cell homeostasis	9/1228	37/18723	0.000508359	0.00434645	0.00302749	NCKAP1L/SLC46A2/PMAIP1/CORO1A/FAS/TSC22D3/JAK3/IL2RA/BAX	9
BP	GO:0045730	respiratory burst	9/1228	37/18723	0.000508359	0.00434645	0.00302749	RAC2/CLEC7A/DUSP10/NCF2/TREM2/NCF1/CAMK1D/HCK/PIK3CD	9
BP	GO:0001649	osteoblast differentiation	29/1228	229/18723	0.000508785	0.00434645	0.00302749	TP63/ACVR1/LEF1/BMP3/TPM4/JUNB/LOX/SNAI2/MAP2K6/CLIC1/TNF/SMAD3/SNAI1/RUNX2/TWIST2/SFRP1/VEGFC/FZD1/WNT7B/GREM1/EPHA2/FHL2/ILK/TMEM119/SMAD1/SOX9/AXIN2/MSX2/PTH1R	29
BP	GO:0043534	blood vessel endothelial cell migration	24/1228	176/18723	0.00051885	0.00442036	0.00307896	TMSB4X/TGFB1/GADD45A/ANXA1/PTK2B/RHOJ/VASH1/CLEC14A/TNF/ANGPT2/GATA2/EMP2/EPHB4/FGFR1/VEGFC/SRPX2/EFNA1/SH3BP1/SLIT2/KLF4/GREM1/EPHA2/PTGS2/APOE	24
BP	GO:0097067	cellular response to thyroid hormone stimulus	6/1228	17/18723	0.000519018	0.00442036	0.00307896	CTSH/CTSS/CTSL/KIT/CTSB/MED1	6
BP	GO:0070168	negative regulation of biomineral tissue development	8/1228	30/18723	0.000533506	0.00453683	0.00316009	TGFB1/PTK2B/SRGN/LTBP3/GAS6/ENPP1/GREM1/SOX9	8
BP	GO:0001933	negative regulation of protein phosphorylation	39/1228	342/18723	0.000538856	0.00457536	0.00318693	TGFB1/IGFBP3/SAMSN1/GADD45A/GPRC5A/TNFAIP3/DUSP10/PTPRC/INPP5F/PTPN22/CDKN1A/TFAP4/HHEX/SFRP1/DUSP6/LRP1/PTPN6/FBLN1/SLIT2/CDKN2B/MICAL1/CNKSR3/ENPP1/GREM1/DAB2IP/SIRPA/PMEPA1/ILK/UBASH3B/SORL1/LAX1/CORO1C/SPRY1/SIRT2/APOE/BAX/SOCS3/PPP1R1B/NR2F2	39
BP	GO:0002707	negative regulation of lymphocyte mediated immunity	11/1228	53/18723	0.000547438	0.00463034	0.00322523	SLAMF1/CD96/BCL6/HAVCR2/PTPRC/IL7R/NCKAP1L/AHR/PTPN6/FOXJ1/TBX21	11
BP	GO:0007566	embryo implantation	11/1228	53/18723	0.000547438	0.00463034	0.00322523	MMP9/TIMP1/MMP2/STC2/EMP2/ARHGDIB/FBLN1/PTGS2/ITGB4/VMP1/TGFBR2	11
BP	GO:0071364	cellular response to epidermal growth factor stimulus	10/1228	45/18723	0.000547817	0.00463034	0.00322523	SNAI2/ZFP36/ZFP36L1/ZFP36L2/PTPN12/DAB2IP/SOX9/PPP1R9B/MED1/PDE8A	10
BP	GO:0071214	cellular response to abiotic stimulus	38/1228	331/18723	0.00055438	0.00467057	0.00325324	MMP9/LTBR/AKR1B1/TIMP1/XRCC5/GADD45A/PTN/MMP7/MMP2/TP53/ITGA2/HYAL1/ADIRF/TSPYL5/ZFP36L1/PTAFR/TLR8/CDKN1A/FAS/BAG3/SFRP1/BAD/CRIP1/RCSD1/TSPO/EGR1/PALM/NFATC4/NMT2/MYC/USP28/NOC2L/PTGS2/BAX/SOX9/MFAP4/MAP3K14/PTGER4	38
BP	GO:0104004	cellular response to environmental stimulus	38/1228	331/18723	0.00055438	0.00467057	0.00325324	MMP9/LTBR/AKR1B1/TIMP1/XRCC5/GADD45A/PTN/MMP7/MMP2/TP53/ITGA2/HYAL1/ADIRF/TSPYL5/ZFP36L1/PTAFR/TLR8/CDKN1A/FAS/BAG3/SFRP1/BAD/CRIP1/RCSD1/TSPO/EGR1/PALM/NFATC4/NMT2/MYC/USP28/NOC2L/PTGS2/BAX/SOX9/MFAP4/MAP3K14/PTGER4	38
BP	GO:0002548	monocyte chemotaxis	13/1228	70/18723	0.000555084	0.00467057	0.00325324	S100A14/ANXA1/CCL19/CCL21/CCL22/CCL5/LGMN/CX3CR1/AIF1/SERPINE1/CXCL12/SLIT2/GREM1	13
[truncated: 794 more rows]

## Sheet: GO_C4
ONTOLOGY	ID	Description	GeneRatio	BgRatio	pvalue	p.adjust	qvalue	geneID	Count
[truncated: 108 more rows]

## Sheet: GO_C5
ONTOLOGY	ID	Description	GeneRatio	BgRatio	pvalue	p.adjust	qvalue	geneID	Count
[truncated: 91 more rows]

## Sheet: GO_C6
ONTOLOGY	ID	Description	GeneRatio	BgRatio	pvalue	p.adjust	qvalue	geneID	Count
[truncated: 255 more rows]

[truncated: 6 more sheets: KEGG_C1, KEGG_C2, KEGG_C3, KEGG_C4, KEGG_C5, KEGG_C6]
