# Supplementary material for: Transcriptome Analysis of Goat Mammary Gland Tissue Reveals the Adaptive Strategies and Molecular Mechanisms of Lactation and Involution
Source: Int J Mol Sci. 2022 Nov 20;23(22):14424. doi: 10.3390/ijms232214424 (PMC9693614; doi:10.3390/ijms232214424)
Supplement: Supplementary file 1 [file ijms-23-14424-s001.zip › Table S9.xlsx]

## Sheet: GO
ONTOLOGY	ID	Description	GeneRatio	BgRatio	pvalue	p.adjust	qvalue	geneID	Count
BP	GO:1901605	alpha-amino acid metabolic process	25/75	203/18800	4.93083e-31	8.0274e-28	5.78724e-28	ASL/AZIN1/ASNSD1/HIBADH/GCAT/PSAT1/DDO/CDO1/ARG2/GSTZ1/PYCR1/PSPH/GOT1/GCDH/THAP4/SCLY/PLOD3/ALDH18A1/OAT/PLOD2/SLC39A8/IVD/FPGS/ASS1/SARDH	25
BP	GO:0006520	cellular amino acid metabolic process	26/75	285/18800	8.21715e-29	6.68876e-26	4.82217e-26	ASL/AZIN1/ASNSD1/HIBADH/GCAT/PSAT1/DDO/CDO1/ARG2/GSTZ1/PYCR1/PSPH/GOT1/GCDH/THAP4/SCLY/PLOD3/ECHS1/ALDH18A1/OAT/PLOD2/SLC39A8/IVD/FPGS/ASS1/SARDH	26
BP	GO:0044282	small molecule catabolic process	19/75	376/18800	3.44431e-16	1.86911e-13	1.34751e-13	AKT1/HIBADH/GCAT/DDO/CDO1/ARG2/GSTZ1/GALM/GOT1/GCK/GCDH/SCLY/ECHS1/OAT/AKR1A1/IVD/PCK2/GALE/SARDH	19
BP	GO:0016054	organic acid catabolic process	16/75	242/18800	1.50407e-15	6.12158e-13	4.41327e-13	AKT1/HIBADH/GCAT/DDO/CDO1/ARG2/GSTZ1/GOT1/GCDH/SCLY/ECHS1/OAT/AKR1A1/IVD/PCK2/SARDH	16
BP	GO:1901607	alpha-amino acid biosynthetic process	11/75	70/18800	3.40221e-15	1.10776e-12	7.98623e-13	ASL/ASNSD1/PSAT1/PYCR1/PSPH/GOT1/PLOD3/ALDH18A1/OAT/PLOD2/ASS1	11
BP	GO:0008652	cellular amino acid biosynthetic process	11/75	76/18800	8.83714e-15	2.39781e-12	1.72867e-12	ASL/ASNSD1/PSAT1/PYCR1/PSPH/GOT1/PLOD3/ALDH18A1/OAT/PLOD2/ASS1	11
BP	GO:0046395	carboxylic acid catabolic process	15/75	238/18800	2.56665e-14	5.9693e-12	4.30348e-12	AKT1/HIBADH/GCAT/DDO/CDO1/ARG2/GSTZ1/GOT1/GCDH/ECHS1/OAT/AKR1A1/IVD/PCK2/SARDH	15
BP	GO:0010232	vascular transport	11/75	87/18800	4.17488e-14	7.5519e-12	5.44444e-12	CD36/ABCG2/SLC5A3/SLC7A5/SLC16A1/TFRC/SLC1A1/SLC1A4/FABP5/SLC1A5/SLC38A3	11
BP	GO:0150104	transport across blood-brain barrier	11/75	87/18800	4.17488e-14	7.5519e-12	5.44444e-12	CD36/ABCG2/SLC5A3/SLC7A5/SLC16A1/TFRC/SLC1A1/SLC1A4/FABP5/SLC1A5/SLC38A3	11
BP	GO:1901606	alpha-amino acid catabolic process	11/75	94/18800	1.00691e-13	1.58512e-11	1.14277e-11	HIBADH/GCAT/DDO/CDO1/ARG2/GSTZ1/GOT1/SCLY/OAT/IVD/SARDH	11
BP	GO:0016053	organic acid biosynthetic process	16/75	318/18800	1.07103e-13	1.58512e-11	1.14277e-11	LPL/ASL/ASNSD1/PSAT1/CDO1/PYCR1/PSPH/GOT1/PLOD3/ALDH18A1/OAT/AKR1A1/PLOD2/ASS1/FABP5/MGLL	16
BP	GO:0009064	glutamine family amino acid metabolic process	10/75	78/18800	5.55193e-13	7.53212e-11	5.43018e-11	ASL/ASNSD1/ARG2/PYCR1/GOT1/ALDH18A1/OAT/SLC39A8/FPGS/ASS1	10
BP	GO:0009063	cellular amino acid catabolic process	11/75	112/18800	7.2335e-13	9.05857e-11	6.53065e-11	HIBADH/GCAT/DDO/CDO1/ARG2/GSTZ1/GOT1/ECHS1/OAT/IVD/SARDH	11
BP	GO:0046394	carboxylic acid biosynthetic process	15/75	316/18800	1.59393e-12	1.85351e-10	1.33626e-10	LPL/ASL/ASNSD1/PSAT1/PYCR1/PSPH/GOT1/PLOD3/ALDH18A1/OAT/AKR1A1/PLOD2/ASS1/FABP5/MGLL	15
BP	GO:0043648	dicarboxylic acid metabolic process	10/75	95/18800	4.22566e-12	4.58625e-10	3.30639e-10	IDH1/DDO/GOT1/ALDH18A1/OAT/ME3/PCK2/FPGS/ASS1/SDHA	10
BP	GO:0015711	organic anion transport	15/75	361/18800	1.06897e-11	1.08767e-09	7.84143e-10	CD36/ABCG2/SLC7A5/SLC35B1/SLC35A2/SLC16A1/SLC35B2/SLC25A4/SLC25A5/SLC39A8/SLC1A1/SLC35D2/SLC1A4/SLC1A5/SLC38A3	15
BP	GO:0098656	anion transmembrane transport	13/75	247/18800	1.55814e-11	1.49215e-09	1.07574e-09	SLC7A5/SLC35B1/SLC35A2/SLC16A1/SLC35B2/SLC25A4/SLC25A5/SLC39A8/SLC1A1/SLC35D2/SLC1A4/SLC1A5/SLC38A3	13
BP	GO:0005996	monosaccharide metabolic process	13/75	261/18800	3.10936e-11	2.81224e-09	2.02745e-09	AKT1/FBP1/GALM/PDHB/SLC35A2/GCK/PGP/PC/AKR1A1/PCK2/ADPGK/GALE/FABP5	13
BP	GO:0019318	hexose metabolic process	12/75	242/18800	2.01072e-10	1.72287e-08	1.24208e-08	AKT1/FBP1/GALM/PDHB/SLC35A2/GCK/PGP/PC/PCK2/ADPGK/GALE/FABP5	12
BP	GO:0015849	organic acid transport	13/75	318/18800	3.59077e-10	2.92289e-08	2.10722e-08	CD36/PLIN2/FABP3/ABCG2/AKT1/SLC7A5/ACSL1/SLC16A1/SLC1A1/SLC1A4/FABP5/SLC1A5/SLC38A3	13
BP	GO:0003018	vascular process in circulatory system	12/75	263/18800	5.22774e-10	4.05274e-08	2.92177e-08	CD36/ABCG2/SLC5A3/SLC7A5/SLC16A1/TFRC/PLOD3/SLC1A1/SLC1A4/FABP5/SLC1A5/SLC38A3	12
BP	GO:1901264	carbohydrate derivative transport	8/75	78/18800	8.19612e-10	6.06513e-08	4.37257e-08	SLC35B1/SLC28A1/SLC35A2/SLC35B2/SLC25A4/SLC25A5/SLC35D2/SLC35C1	8
BP	GO:0009066	aspartate family amino acid metabolic process	7/75	49/18800	9.07178e-10	6.42124e-08	4.62931e-08	ASNSD1/GCAT/DDO/GOT1/PLOD3/PLOD2/ASS1	7
BP	GO:0009084	glutamine family amino acid biosynthetic process	5/75	17/18800	5.26021e-09	3.56817e-07	2.57242e-07	ASL/PYCR1/ALDH18A1/OAT/ASS1	5
BP	GO:0006006	glucose metabolic process	10/75	201/18800	7.06857e-09	4.60305e-07	3.31851e-07	AKT1/FBP1/GALM/PDHB/GCK/PGP/PC/PCK2/ADPGK/FABP5	10
BP	GO:0044272	sulfur compound biosynthetic process	9/75	149/18800	7.78697e-09	4.87584e-07	3.51517e-07	CDO1/ACSS2/PDHB/ACSL1/GCDH/SLC35B2/AKR1A1/SLC1A1/SLC35D2	9
BP	GO:0006790	sulfur compound metabolic process	12/75	339/18800	9.18595e-09	5.39261e-07	3.88773e-07	IDH1/CDO1/GSTZ1/ACSS2/HMGCS1/PDHB/ACSL1/GCDH/SLC35B2/AKR1A1/SLC1A1/SLC35D2	12
BP	GO:1905039	carboxylic acid transmembrane transport	9/75	152/18800	9.27477e-09	5.39261e-07	3.88773e-07	CD36/AKT1/SLC7A5/ACSL1/SLC16A1/SLC1A1/SLC1A4/SLC1A5/SLC38A3	9
BP	GO:1903825	organic acid transmembrane transport	9/75	153/18800	9.82322e-09	5.51455e-07	3.97564e-07	CD36/AKT1/SLC7A5/ACSL1/SLC16A1/SLC1A1/SLC1A4/SLC1A5/SLC38A3	9
BP	GO:0006525	arginine metabolic process	5/75	20/18800	1.30572e-08	7.08568e-07	5.10832e-07	ASL/ARG2/OAT/SLC39A8/ASS1	5
BP	GO:0034637	cellular carbohydrate biosynthetic process	7/75	79/18800	2.78357e-08	1.46182e-06	1.05388e-06	AKT1/FBP1/UGP2/GOT1/GCK/PGP/PCK2	7
BP	GO:0098657	import into cell	10/75	238/18800	3.53082e-08	1.7963e-06	1.29502e-06	CD36/FABP3/AKT1/SLC5A3/SLC7A5/ACSL1/SLC39A8/SLC1A1/SLC1A4/SLC1A5	10
BP	GO:0006631	fatty acid metabolic process	12/75	395/18800	4.96539e-08	2.44959e-06	1.766e-06	CD36/LPL/FABP3/AKT1/DBI/ACSL1/GCDH/ECHS1/IVD/PCK2/FABP5/MGLL	12
BP	GO:0098739	import across plasma membrane	9/75	188/18800	5.87354e-08	2.81239e-06	2.02755e-06	CD36/AKT1/SLC5A3/SLC7A5/ACSL1/SLC39A8/SLC1A1/SLC1A4/SLC1A5	9
BP	GO:0006091	generation of precursor metabolites and energy	13/75	494/18800	6.97053e-08	3.24229e-06	2.33749e-06	AKT1/IDH1/FBP1/UGP2/ACSS2/PDHB/GCK/SLC25A4/ME3/ACO1/ADPGK/SDHA/TKT	13
BP	GO:0015780	nucleotide-sugar transmembrane transport	4/75	12/18800	1.12862e-07	5.10388e-06	3.67957e-06	SLC35B1/SLC35A2/SLC35D2/SLC35C1	4
BP	GO:0016051	carbohydrate biosynthetic process	9/75	209/18800	1.4536e-07	6.39584e-06	4.61099e-06	AKT1/FBP1/UGP2/GOT1/GCK/PGP/PC/AKR1A1/PCK2	9
BP	GO:1905952	regulation of lipid localization	8/75	155/18800	1.88227e-07	8.06404e-06	5.81366e-06	CD36/PLIN2/LPL/FABP3/PNPLA2/AKT1/DBI/ACSL1	8
BP	GO:0006090	pyruvate metabolic process	7/75	106/18800	2.14822e-07	8.7991e-06	6.34359e-06	FBP1/PDHB/GCK/PC/ME3/PCK2/ADPGK	7
BP	GO:0044242	cellular lipid catabolic process	9/75	219/18800	2.16194e-07	8.7991e-06	6.34359e-06	LPL/PNPLA2/AKT1/IDH1/GCDH/ECHS1/IVD/PCK2/MGLL	9
BP	GO:0015909	long-chain fatty acid transport	6/75	66/18800	2.47167e-07	9.81432e-06	7.0755e-06	CD36/PLIN2/FABP3/AKT1/ACSL1/FABP5	6
BP	GO:0009069	serine family amino acid metabolic process	5/75	40/18800	5.20793e-07	2.01869e-05	1.45535e-05	GCAT/PSAT1/CDO1/PSPH/SCLY	5
BP	GO:0044539	long-chain fatty acid import into cell	4/75	17/18800	5.34508e-07	2.02367e-05	1.45894e-05	CD36/FABP3/AKT1/ACSL1	4
BP	GO:0140354	lipid import into cell	4/75	18/18800	6.8515e-07	2.53505e-05	1.82761e-05	CD36/FABP3/AKT1/ACSL1	4
BP	GO:0006575	cellular modified amino acid metabolic process	8/75	188/18800	8.20247e-07	2.96747e-05	2.13936e-05	IDH1/GSTZ1/PLOD3/PLOD2/SLC1A1/FPGS/ASS1/SARDH	8
BP	GO:0046364	monosaccharide biosynthetic process	6/75	86/18800	1.20096e-06	4.25034e-05	3.06423e-05	FBP1/GCK/PGP/PC/AKR1A1/PCK2	6
BP	GO:0009067	aspartate family amino acid biosynthetic process	4/75	21/18800	1.32797e-06	4.59988e-05	3.31622e-05	ASNSD1/GOT1/PLOD3/PLOD2	4
BP	GO:0046942	carboxylic acid transport	9/75	279/18800	1.63767e-06	5.55442e-05	4.00438e-05	CD36/ABCG2/SLC7A5/SLC16A1/SLC1A1/SLC35D2/SLC1A4/SLC1A5/SLC38A3	9
BP	GO:0015804	neutral amino acid transport	5/75	51/18800	1.79682e-06	5.96985e-05	4.30388e-05	SLC7A5/SLC1A1/SLC1A4/SLC1A5/SLC38A3	5
BP	GO:1905954	positive regulation of lipid localization	6/75	94/18800	2.02813e-06	6.59724e-05	4.75619e-05	CD36/PLIN2/LPL/FABP3/DBI/ACSL1	6
BP	GO:0044262	cellular carbohydrate metabolic process	9/75	287/18800	2.0667e-06	6.59724e-05	4.75619e-05	AKT1/SLC5A3/IDH1/FBP1/UGP2/GOT1/GCK/PGP/PCK2	9
BP	GO:0072530	purine-containing compound transmembrane transport	4/75	24/18800	2.33646e-06	7.31492e-05	5.27359e-05	SLC28A1/SLC35B2/SLC25A4/SLC25A5	4
BP	GO:0015931	nucleobase-containing compound transport	8/75	218/18800	2.48921e-06	7.6461e-05	5.51235e-05	SLC35B1/SLC28A1/SLC35A2/SLC35B2/SLC25A4/SLC25A5/SLC35D2/SLC35C1	8
BP	GO:0015908	fatty acid transport	6/75	99/18800	2.74756e-06	8.28339e-05	5.9718e-05	CD36/PLIN2/FABP3/AKT1/ACSL1/FABP5	6
BP	GO:0008643	carbohydrate transport	7/75	156/18800	2.92791e-06	8.66662e-05	6.24808e-05	AKT1/SLC5A3/SLC35B1/SLC35A2/SLC35D2/FABP5/SLC35C1	7
BP	GO:0019693	ribose phosphate metabolic process	10/75	394/18800	3.59403e-06	0.000104484	7.53261e-05	FBP1/ACSS2/HMGCS1/PDHB/ACSL1/GCK/GCDH/SLC35B2/ADPGK/TKT	10
BP	GO:0046486	glycerolipid metabolic process	10/75	396/18800	3.75898e-06	0.000107362	7.7401e-05	LPL/FABP3/PNPLA2/DBI/ACSL1/PGP/PCK2/FABP5/PEMT/MGLL	10
BP	GO:0033866	nucleoside bisphosphate biosynthetic process	5/75	60/18800	4.06257e-06	0.000110231	7.94696e-05	ACSS2/PDHB/ACSL1/GCDH/SLC35B2	5
BP	GO:0034030	ribonucleoside bisphosphate biosynthetic process	5/75	60/18800	4.06257e-06	0.000110231	7.94696e-05	ACSS2/PDHB/ACSL1/GCDH/SLC35B2	5
BP	GO:0034033	purine nucleoside bisphosphate biosynthetic process	5/75	60/18800	4.06257e-06	0.000110231	7.94696e-05	ACSS2/PDHB/ACSL1/GCDH/SLC35B2	5
BP	GO:0016042	lipid catabolic process	9/75	327/18800	5.98195e-06	0.000159649	0.000115097	LPL/PNPLA2/AKT1/IDH1/GCDH/ECHS1/IVD/PCK2/MGLL	9
BP	GO:0006099	tricarboxylic acid cycle	4/75	31/18800	6.77381e-06	0.000174273	0.00012564	IDH1/PDHB/ACO1/SDHA	4
BP	GO:1902475	L-alpha-amino acid transmembrane transport	5/75	67/18800	7.02966e-06	0.000174273	0.00012564	SLC7A5/SLC1A1/SLC1A4/SLC1A5/SLC38A3	5
BP	GO:0000050	urea cycle	3/75	10/18800	7.17217e-06	0.000174273	0.00012564	ASL/ARG2/ASS1	3
BP	GO:0006560	proline metabolic process	3/75	10/18800	7.17217e-06	0.000174273	0.00012564	PYCR1/ALDH18A1/OAT	3
BP	GO:0015851	nucleobase transport	3/75	10/18800	7.17217e-06	0.000174273	0.00012564	SLC28A1/SLC25A4/SLC25A5	3
BP	GO:0015911	long-chain fatty acid import across plasma membrane	3/75	10/18800	7.17217e-06	0.000174273	0.00012564	CD36/AKT1/ACSL1	3
BP	GO:0015807	L-amino acid transport	5/75	69/18800	8.1298e-06	0.000194637	0.000140321	SLC7A5/SLC1A1/SLC1A4/SLC1A5/SLC38A3	5
BP	GO:0070778	L-aspartate transmembrane transport	3/75	11/18800	9.83344e-06	0.000226861	0.000163553	SLC1A1/SLC1A4/SLC1A5	3
BP	GO:0090481	pyrimidine nucleotide-sugar transmembrane transport	3/75	11/18800	9.83344e-06	0.000226861	0.000163553	SLC35B1/SLC35A2/SLC35D2	3
BP	GO:0006536	glutamate metabolic process	4/75	34/18800	9.89384e-06	0.000226861	0.000163553	GOT1/ALDH18A1/OAT/FPGS	4
BP	GO:0072329	monocarboxylic acid catabolic process	6/75	124/18800	1.01216e-05	0.000228553	0.000164772	AKT1/GCDH/ECHS1/AKR1A1/IVD/PCK2	6
BP	GO:0033865	nucleoside bisphosphate metabolic process	6/75	125/18800	1.05986e-05	0.000228553	0.000164772	ACSS2/HMGCS1/PDHB/ACSL1/GCDH/SLC35B2	6
BP	GO:0033875	ribonucleoside bisphosphate metabolic process	6/75	125/18800	1.05986e-05	0.000228553	0.000164772	ACSS2/HMGCS1/PDHB/ACSL1/GCDH/SLC35B2	6
BP	GO:0034032	purine nucleoside bisphosphate metabolic process	6/75	125/18800	1.05986e-05	0.000228553	0.000164772	ACSS2/HMGCS1/PDHB/ACSL1/GCDH/SLC35B2	6
BP	GO:0010876	lipid localization	10/75	446/18800	1.06696e-05	0.000228553	0.000164772	CD36/PLIN2/LPL/FABP3/ABCG2/PNPLA2/AKT1/DBI/ACSL1/FABP5	10
BP	GO:0019627	urea metabolic process	3/75	12/18800	1.30736e-05	0.000272353	0.000196349	ASL/ARG2/ASS1	3
BP	GO:0071941	nitrogen cycle metabolic process	3/75	12/18800	1.30736e-05	0.000272353	0.000196349	ASL/ARG2/ASS1	3
BP	GO:0006066	alcohol metabolic process	9/75	361/18800	1.32161e-05	0.000272353	0.000196349	PNPLA2/SLC5A3/IDH1/ACSS2/HMGCS1/GOT1/PGP/AKR1A1/PCK2	9
BP	GO:0009150	purine ribonucleotide metabolic process	9/75	366/18800	1.47423e-05	0.000300005	0.000216285	FBP1/ACSS2/HMGCS1/PDHB/ACSL1/GCK/GCDH/SLC35B2/ADPGK	9
BP	GO:0006094	gluconeogenesis	5/75	79/18800	1.58059e-05	0.000317679	0.000229026	FBP1/GCK/PGP/PC/PCK2	5
BP	GO:0019319	hexose biosynthetic process	5/75	82/18800	1.89586e-05	0.000371863	0.00026809	FBP1/GCK/PGP/PC/PCK2	5
BP	GO:2001057	reactive nitrogen species metabolic process	5/75	82/18800	1.89586e-05	0.000371863	0.00026809	CD36/AKT1/ARG2/THAP4/ASS1	5
BP	GO:0072350	tricarboxylic acid metabolic process	3/75	14/18800	2.1507e-05	0.000412687	0.000297521	IDH1/ACO1/ASS1	3
BP	GO:0009259	ribonucleotide metabolic process	9/75	384/18800	2.15469e-05	0.000412687	0.000297521	FBP1/ACSS2/HMGCS1/PDHB/ACSL1/GCK/GCDH/SLC35B2/ADPGK	9
BP	GO:1901652	response to peptide	10/75	491/18800	2.44116e-05	0.000462117	0.000333157	CD36/LPL/AKT1/GNAI1/FBP1/CDO1/GOT1/GCK/PCK2/ASS1	10
BP	GO:0006163	purine nucleotide metabolic process	9/75	394/18800	2.63697e-05	0.000493446	0.000355743	FBP1/ACSS2/HMGCS1/PDHB/ACSL1/GCK/GCDH/SLC35B2/ADPGK	9
BP	GO:0010889	regulation of sequestering of triglyceride	3/75	15/18800	2.68066e-05	0.000495923	0.000357529	PLIN2/LPL/PNPLA2	3
BP	GO:0035384	thioester biosynthetic process	4/75	45/18800	3.07487e-05	0.000550098	0.000396586	ACSS2/PDHB/ACSL1/GCDH	4
BP	GO:0071616	acyl-CoA biosynthetic process	4/75	45/18800	3.07487e-05	0.000550098	0.000396586	ACSS2/PDHB/ACSL1/GCDH	4
BP	GO:0089718	amino acid import across plasma membrane	4/75	45/18800	3.07487e-05	0.000550098	0.000396586	SLC7A5/SLC1A1/SLC1A4/SLC1A5	4
BP	GO:0043434	response to peptide hormone	9/75	404/18800	3.20813e-05	0.000567699	0.000409275	LPL/AKT1/GNAI1/FBP1/CDO1/GOT1/GCK/PCK2/ASS1	9
BP	GO:0042398	cellular modified amino acid biosynthetic process	4/75	46/18800	3.35758e-05	0.000587756	0.000423735	PLOD3/PLOD2/SLC1A1/FPGS	4
BP	GO:0006637	acyl-CoA metabolic process	5/75	93/18800	3.49018e-05	0.000598106	0.000431196	ACSS2/HMGCS1/PDHB/ACSL1/GCDH	5
BP	GO:0035383	thioester metabolic process	5/75	93/18800	3.49018e-05	0.000598106	0.000431196	ACSS2/HMGCS1/PDHB/ACSL1/GCDH	5
BP	GO:0046460	neutral lipid biosynthetic process	4/75	48/18800	3.97946e-05	0.000667894	0.000481509	LPL/PNPLA2/ACSL1/PCK2	4
BP	GO:0046463	acylglycerol biosynthetic process	4/75	48/18800	3.97946e-05	0.000667894	0.000481509	LPL/PNPLA2/ACSL1/PCK2	4
BP	GO:0072521	purine-containing compound metabolic process	9/75	416/18800	4.02913e-05	0.000669329	0.000482544	FBP1/ACSS2/HMGCS1/PDHB/ACSL1/GCK/GCDH/SLC35B2/ADPGK	9
BP	GO:0015980	energy derivation by oxidation of organic compounds	8/75	321/18800	4.13566e-05	0.000674331	0.00048615	AKT1/IDH1/UGP2/PDHB/GCK/ME3/ACO1/SDHA	8
BP	GO:1990845	adaptive thermogenesis	6/75	159/18800	4.14208e-05	0.000674331	0.00048615	CD36/ACSL1/SLC25A4/SLC25A5/FABP5/PEMT	6
BP	GO:0009068	aspartate family amino acid catabolic process	3/75	18/18800	4.76628e-05	0.000753351	0.000543118	GCAT/DDO/GOT1	3
BP	GO:0030730	sequestering of triglyceride	3/75	18/18800	4.76628e-05	0.000753351	0.000543118	PLIN2/LPL/PNPLA2	3
BP	GO:1902001	fatty acid transmembrane transport	3/75	18/18800	4.76628e-05	0.000753351	0.000543118	CD36/AKT1/ACSL1	3
BP	GO:0003333	amino acid transmembrane transport	5/75	100/18800	4.94763e-05	0.000774494	0.000558361	SLC7A5/SLC1A1/SLC1A4/SLC1A5/SLC38A3	5
BP	GO:0010823	negative regulation of mitochondrion organization	4/75	51/18800	5.06483e-05	0.000785289	0.000566143	AKT1/TFRC/SLC25A4/SLC25A5	4
BP	GO:0009062	fatty acid catabolic process	5/75	102/18800	5.43986e-05	0.000835481	0.000602328	AKT1/GCDH/ECHS1/IVD/PCK2	5
BP	GO:0006071	glycerol metabolic process	3/75	19/18800	5.64374e-05	0.000858692	0.000619062	GOT1/PGP/PCK2	3
BP	GO:0006641	triglyceride metabolic process	5/75	103/18800	5.69974e-05	0.000859183	0.000619416	LPL/PNPLA2/ACSL1/PCK2/MGLL	5
BP	GO:0043090	amino acid import	4/75	53/18800	5.89913e-05	0.000881081	0.000635204	SLC7A5/SLC1A1/SLC1A4/SLC1A5	4
BP	GO:0072348	sulfur compound transport	4/75	54/18800	6.35189e-05	0.00094008	0.000677738	ABCG2/SLC35B2/SLC1A1/SLC1A4	4
BP	GO:0019395	fatty acid oxidation	5/75	106/18800	6.53726e-05	0.000958799	0.000691233	FABP3/AKT1/GCDH/ECHS1/IVD	5
BP	GO:1901679	nucleotide transmembrane transport	3/75	20/18800	6.62067e-05	0.000962361	0.000693801	SLC35B2/SLC25A4/SLC25A5	3
BP	GO:0045017	glycerolipid biosynthetic process	7/75	253/18800	6.69971e-05	0.000965232	0.000695871	LPL/FABP3/PNPLA2/ACSL1/PCK2/FABP5/PEMT	7
BP	GO:0010883	regulation of lipid storage	4/75	55/18800	6.82946e-05	0.000975295	0.000703126	CD36/PLIN2/LPL/PNPLA2	4
BP	GO:0031667	response to nutrient levels	9/75	446/18800	6.89431e-05	0.000975994	0.00070363	LPL/AKT1/PSPH/ACSL1/SLC16A1/TFRC/PCK2/ASS1/SLC38A3	9
BP	GO:0009083	branched-chain amino acid catabolic process	3/75	21/18800	7.70198e-05	0.00107169	0.000772623	HIBADH/ECHS1/IVD	3
BP	GO:0019400	alditol metabolic process	3/75	21/18800	7.70198e-05	0.00107169	0.000772623	GOT1/PGP/PCK2	3
BP	GO:0034440	lipid oxidation	5/75	112/18800	8.49481e-05	0.001172	0.000844934	FABP3/AKT1/GCDH/ECHS1/IVD	5
BP	GO:1901653	cellular response to peptide	8/75	361/18800	9.41062e-05	0.00128744	0.000928159	CD36/LPL/AKT1/FBP1/GOT1/GCK/PCK2/ASS1	8
BP	GO:0046390	ribose phosphate biosynthetic process	6/75	191/18800	0.000114399	0.00155201	0.0011189	ACSS2/PDHB/ACSL1/GCDH/SLC35B2/TKT	6
BP	GO:0070542	response to fatty acid	4/75	63/18800	0.000116439	0.00156663	0.00112944	CD36/LPL/ACSL1/ASS1	4
BP	GO:0009991	response to extracellular stimulus	9/75	479/18800	0.000118667	0.00158353	0.00114162	LPL/AKT1/PSPH/ACSL1/SLC16A1/TFRC/PCK2/ASS1/SLC38A3	9
BP	GO:0009081	branched-chain amino acid metabolic process	3/75	25/18800	0.000131673	0.00174279	0.00125644	HIBADH/ECHS1/IVD	3
BP	GO:0009117	nucleotide metabolic process	9/75	487/18800	0.000134449	0.00176518	0.00127258	FBP1/ACSS2/HMGCS1/PDHB/ACSL1/GCK/GCDH/SLC35B2/ADPGK	9
BP	GO:0006753	nucleoside phosphate metabolic process	9/75	495/18800	0.000151953	0.00197903	0.00142676	FBP1/ACSS2/HMGCS1/PDHB/ACSL1/GCK/GCDH/SLC35B2/ADPGK	9
BP	GO:0006644	phospholipid metabolic process	8/75	388/18800	0.000154643	0.00199809	0.00144049	LPL/FABP3/DBI/IDH1/HMGCS1/PGP/FABP5/PEMT	8
BP	GO:0006869	lipid transport	8/75	391/18800	0.000163002	0.00208504	0.00150318	CD36/PLIN2/FABP3/ABCG2/AKT1/DBI/ACSL1/FABP5	8
BP	GO:0009065	glutamine family amino acid catabolic process	3/75	27/18800	0.000166496	0.00208504	0.00150318	ARG2/GOT1/OAT	3
BP	GO:0010884	positive regulation of lipid storage	3/75	27/18800	0.000166496	0.00208504	0.00150318	CD36/PLIN2/LPL	3
BP	GO:0051503	adenine nucleotide transport	3/75	27/18800	0.000166496	0.00208504	0.00150318	SLC35B2/SLC25A4/SLC25A5	3
BP	GO:0032869	cellular response to insulin stimulus	6/75	205/18800	0.000168284	0.00209135	0.00150773	LPL/AKT1/FBP1/GOT1/GCK/PCK2	6
BP	GO:0071375	cellular response to peptide hormone stimulus	7/75	294/18800	0.000170377	0.00210132	0.00151492	LPL/AKT1/FBP1/GOT1/GCK/PCK2/ASS1	7
BP	GO:0032890	regulation of organic acid transport	4/75	70/18800	0.000175494	0.00214816	0.00154868	FABP3/AKT1/ACSL1/SLC38A3	4
BP	GO:0006639	acylglycerol metabolic process	5/75	131/18800	0.000177697	0.00215888	0.00155642	LPL/PNPLA2/ACSL1/PCK2/MGLL	5
BP	GO:0006638	neutral lipid metabolic process	5/75	132/18800	0.000184123	0.00220958	0.00159297	LPL/PNPLA2/ACSL1/PCK2/MGLL	5
BP	GO:0015740	C4-dicarboxylate transport	3/75	28/18800	0.000185941	0.00220958	0.00159297	SLC1A1/SLC1A4/SLC1A5	3
BP	GO:0015868	purine ribonucleotide transport	3/75	28/18800	0.000185941	0.00220958	0.00159297	SLC35B2/SLC25A4/SLC25A5	3
BP	GO:0006656	phosphatidylcholine biosynthetic process	3/75	29/18800	0.000206803	0.00242212	0.00174619	FABP3/FABP5/PEMT	3
BP	GO:0015865	purine nucleotide transport	3/75	29/18800	0.000206803	0.00242212	0.00174619	SLC35B2/SLC25A4/SLC25A5	3
BP	GO:0046470	phosphatidylcholine metabolic process	4/75	74/18800	0.000217596	0.00253033	0.00182421	FABP3/DBI/FABP5/PEMT	4
BP	GO:0030258	lipid modification	6/75	216/18800	0.00022331	0.00257836	0.00185883	FABP3/AKT1/GCDH/ECHS1/IVD/SLC35C1	6
BP	GO:0006809	nitric oxide biosynthetic process	4/75	75/18800	0.000229164	0.00262732	0.00189413	CD36/AKT1/ARG2/ASS1	4
BP	GO:0006635	fatty acid beta-oxidation	4/75	76/18800	0.000241169	0.00274562	0.00197942	AKT1/GCDH/ECHS1/IVD	4
BP	GO:0009072	aromatic amino acid family metabolic process	3/75	31/18800	0.000252946	0.00283998	0.00204744	GSTZ1/GCDH/THAP4	3
BP	GO:0019433	triglyceride catabolic process	3/75	31/18800	0.000252946	0.00283998	0.00204744	LPL/PNPLA2/MGLL	3
BP	GO:0006865	amino acid transport	5/75	145/18800	0.000284877	0.00317657	0.0022901	SLC7A5/SLC1A1/SLC1A4/SLC1A5/SLC38A3	5
BP	GO:0006084	acetyl-CoA metabolic process	3/75	33/18800	0.000305271	0.00333544	0.00240464	ACSS2/HMGCS1/PDHB	3
BP	GO:0055094	response to lipoprotein particle	3/75	33/18800	0.000305271	0.00333544	0.00240464	CD36/LPL/AKT1	3
BP	GO:2000191	regulation of fatty acid transport	3/75	33/18800	0.000305271	0.00333544	0.00240464	FABP3/AKT1/ACSL1	3
BP	GO:0046209	nitric oxide metabolic process	4/75	81/18800	0.000308077	0.00334366	0.00241057	CD36/AKT1/ARG2/ASS1	4
BP	GO:0007584	response to nutrient	5/75	150/18800	0.000333111	0.00359142	0.00258919	LPL/ACSL1/SLC16A1/TFRC/ASS1	5
BP	GO:0016052	carbohydrate catabolic process	5/75	152/18800	0.000354045	0.00379201	0.0027338	FBP1/GALM/GCK/ADPGK/GALE	5
BP	GO:0019320	hexose catabolic process	3/75	35/18800	0.00036411	0.00387433	0.00279314	GALM/GCK/GALE	3
BP	GO:0019915	lipid storage	4/75	86/18800	0.000387356	0.0040949	0.00295217	CD36/PLIN2/LPL/PNPLA2	4
BP	GO:0071402	cellular response to lipoprotein particle stimulus	3/75	36/18800	0.000396076	0.00416007	0.00299915	CD36/LPL/AKT1	3
BP	GO:0006739	NADP metabolic process	3/75	37/18800	0.000429792	0.00445669	0.00321299	IDH1/GCK/TKT	3
BP	GO:0006862	nucleotide transport	3/75	37/18800	0.000429792	0.00445669	0.00321299	SLC35B2/SLC25A4/SLC25A5	3
BP	GO:0046365	monosaccharide catabolic process	3/75	39/18800	0.000502632	0.00517902	0.00373374	GALM/GCK/GALE	3
BP	GO:0019432	triglyceride biosynthetic process	3/75	40/18800	0.000541833	0.00552551	0.00398354	LPL/ACSL1/PCK2	3
BP	GO:1901655	cellular response to ketone	4/75	94/18800	0.000543048	0.00552551	0.00398354	AKT1/GNAI1/PCK2/ASS1	4
BP	GO:0045429	positive regulation of nitric oxide biosynthetic process	3/75	41/18800	0.000582939	0.00582224	0.00419747	CD36/AKT1/ASS1	3
BP	GO:0046461	neutral lipid catabolic process	3/75	41/18800	0.000582939	0.00582224	0.00419747	LPL/PNPLA2/MGLL	3
BP	GO:0046464	acylglycerol catabolic process	3/75	41/18800	0.000582939	0.00582224	0.00419747	LPL/PNPLA2/MGLL	3
BP	GO:0032868	response to insulin	6/75	259/18800	0.000586891	0.00582405	0.00419877	LPL/AKT1/FBP1/GOT1/GCK/PCK2	6
BP	GO:0009152	purine ribonucleotide biosynthetic process	5/75	170/18800	0.000590275	0.00582405	0.00419877	ACSS2/PDHB/ACSL1/GCDH/SLC35B2	5
BP	GO:0120162	positive regulation of cold-induced thermogenesis	4/75	98/18800	0.000635587	0.00623335	0.00449385	CD36/ACSL1/FABP5/PEMT	4
BP	GO:1904407	positive regulation of nitric oxide metabolic process	3/75	43/18800	0.000671015	0.00654139	0.00471593	CD36/AKT1/ASS1	3
BP	GO:0015808	L-alanine transport	2/75	10/18800	0.000692174	0.0067075	0.00483568	SLC1A4/SLC38A3	2
BP	GO:0043255	regulation of carbohydrate biosynthetic process	4/75	102/18800	0.000738798	0.00707507	0.00510068	AKT1/FBP1/GCK/PGP	4
BP	GO:0062014	negative regulation of small molecule metabolic process	4/75	102/18800	0.000738798	0.00707507	0.00510068	AKT1/FBP1/GCK/PGP	4
BP	GO:0010677	negative regulation of cellular carbohydrate metabolic process	3/75	45/18800	0.000767151	0.00726118	0.00523485	FBP1/GCK/PGP	3
BP	GO:0032892	positive regulation of organic acid transport	3/75	45/18800	0.000767151	0.00726118	0.00523485	FABP3/ACSL1/SLC38A3	3
BP	GO:0005978	glycogen biosynthetic process	3/75	46/18800	0.000818331	0.00765657	0.0055199	AKT1/UGP2/GCK	3
BP	GO:0009250	glucan biosynthetic process	3/75	46/18800	0.000818331	0.00765657	0.0055199	AKT1/UGP2/GCK	3
BP	GO:0009260	ribonucleotide biosynthetic process	5/75	184/18800	0.000843603	0.0077175	0.00556383	ACSS2/PDHB/ACSL1/GCDH/SLC35B2	5
BP	GO:0006527	arginine catabolic process	2/75	11/18800	0.000843805	0.0077175	0.00556383	ARG2/OAT	2
BP	GO:0032329	serine transport	2/75	11/18800	0.000843805	0.0077175	0.00556383	SLC1A4/SLC1A5	2
BP	GO:0033539	fatty acid beta-oxidation using acyl-CoA dehydrogenase	2/75	11/18800	0.000843805	0.0077175	0.00556383	GCDH/IVD	2
BP	GO:0009060	aerobic respiration	5/75	187/18800	0.000907045	0.00824955	0.0059474	IDH1/PDHB/ME3/ACO1/SDHA	5
BP	GO:1903426	regulation of reactive oxygen species biosynthetic process	3/75	48/18800	0.000927088	0.00838499	0.00604504	CD36/SLC5A3/ARG2	3
BP	GO:1901654	response to ketone	5/75	190/18800	0.000973977	0.00876041	0.0063157	AKT1/GNAI1/PSPH/PCK2/ASS1	5
BP	GO:0006563	L-serine metabolic process	2/75	12/18800	0.00100995	0.00883979	0.00637293	PSAT1/PSPH	2
BP	GO:0045117	azole transmembrane transport	2/75	12/18800	0.00100995	0.00883979	0.00637293	SLC28A1/SLC38A3	2
BP	GO:0140052	cellular response to oxidised low-density lipoprotein particle stimulus	2/75	12/18800	0.00100995	0.00883979	0.00637293	CD36/AKT1	2
BP	GO:1901029	negative regulation of mitochondrial outer membrane permeabilization involved in apoptotic signaling pathway	2/75	12/18800	0.00100995	0.00883979	0.00637293	SLC25A4/SLC25A5	2
BP	GO:1901524	regulation of mitophagy	2/75	12/18800	0.00100995	0.00883979	0.00637293	SLC25A4/SLC25A5	2
BP	GO:0006164	purine nucleotide biosynthetic process	5/75	192/18800	0.0010206	0.00888519	0.00640566	ACSS2/PDHB/ACSL1/GCDH/SLC35B2	5
BP	GO:0006111	regulation of gluconeogenesis	3/75	51/18800	0.00110672	0.00953303	0.0068727	FBP1/GCK/PGP	3
BP	GO:0045912	negative regulation of carbohydrate metabolic process	3/75	51/18800	0.00110672	0.00953303	0.0068727	FBP1/GCK/PGP	3
BP	GO:0046916	cellular transition metal ion homeostasis	4/75	115/18800	0.00115594	0.00985276	0.00710321	TFRC/SLC39A8/ACO1/SLC1A1	4
BP	GO:1990748	cellular detoxification	4/75	115/18800	0.00115594	0.00985276	0.00710321	CD36/ABCG2/GSTZ1/AKR1A1	4
BP	GO:0015801	aromatic amino acid transport	2/75	13/18800	0.0011905	0.00996541	0.00718442	SLC7A5/SLC38A3	2
BP	GO:0061620	glycolytic process through glucose-6-phosphate	2/75	13/18800	0.0011905	0.00996541	0.00718442	GCK/ADPGK	2
BP	GO:1903599	positive regulation of autophagy of mitochondrion	2/75	13/18800	0.0011905	0.00996541	0.00718442	SLC25A4/SLC25A5	2
BP	GO:0019751	polyol metabolic process	4/75	116/18800	0.00119365	0.00996541	0.00718442	SLC5A3/GOT1/PGP/PCK2	4
BP	GO:0009410	response to xenobiotic stimulus	7/75	411/18800	0.00125385	0.0104146	0.00750826	PLIN2/LPL/FBP1/ACSL1/TFRC/SLC1A1/ASS1	7
BP	GO:0032368	regulation of lipid transport	4/75	118/18800	0.00127162	0.0105086	0.00757604	FABP3/AKT1/DBI/ACSL1	4
BP	GO:0072522	purine-containing compound biosynthetic process	5/75	202/18800	0.00127901	0.0105163	0.00758157	ACSS2/PDHB/ACSL1/GCDH/SLC35B2	5
BP	GO:0009071	serine family amino acid catabolic process	2/75	14/18800	0.00138533	0.0112766	0.0081297	CDO1/SCLY	2
BP	GO:0061615	glycolytic process through fructose-6-phosphate	2/75	14/18800	0.00138533	0.0112766	0.0081297	GCK/ADPGK	2
BP	GO:0010906	regulation of glucose metabolic process	4/75	123/18800	0.00148204	0.0119444	0.00861113	AKT1/FBP1/GCK/PGP	4
BP	GO:0097237	cellular response to toxic substance	4/75	123/18800	0.00148204	0.0119444	0.00861113	CD36/ABCG2/GSTZ1/AKR1A1	4
BP	GO:0006570	tyrosine metabolic process	2/75	15/18800	0.00159433	0.0126613	0.00912802	GSTZ1/THAP4	2
BP	GO:0032328	alanine transport	2/75	15/18800	0.00159433	0.0126613	0.00912802	SLC1A4/SLC38A3	2
BP	GO:0045725	positive regulation of glycogen biosynthetic process	2/75	15/18800	0.00159433	0.0126613	0.00912802	AKT1/GCK	2
BP	GO:0015867	ATP transport	2/75	16/18800	0.0018174	0.0142933	0.0103046	SLC25A4/SLC25A5	2
BP	GO:0070875	positive regulation of glycogen metabolic process	2/75	16/18800	0.0018174	0.0142933	0.0103046	AKT1/GCK	2
BP	GO:0045428	regulation of nitric oxide biosynthetic process	3/75	61/18800	0.00185884	0.0144104	0.010389	CD36/AKT1/ASS1	3
BP	GO:0050994	regulation of lipid catabolic process	3/75	61/18800	0.00185884	0.0144104	0.010389	PNPLA2/AKT1/IDH1	3
BP	GO:1903409	reactive oxygen species biosynthetic process	3/75	61/18800	0.00185884	0.0144104	0.010389	CD36/SLC5A3/ARG2	3
BP	GO:0006767	water-soluble vitamin metabolic process	3/75	63/18800	0.00203936	0.0156288	0.0112674	PSAT1/AKR1A1/FPGS	3
BP	GO:0046173	polyol biosynthetic process	3/75	63/18800	0.00203936	0.0156288	0.0112674	GOT1/PGP/PCK2	3
BP	GO:0006103	2-oxoglutarate metabolic process	2/75	17/18800	0.0020544	0.0156288	0.0112674	IDH1/GOT1	2
BP	GO:0045721	negative regulation of gluconeogenesis	2/75	17/18800	0.0020544	0.0156288	0.0112674	GCK/PGP	2
BP	GO:0080164	regulation of nitric oxide metabolic process	3/75	64/18800	0.00213357	0.0161556	0.0116471	CD36/AKT1/ASS1	3
BP	GO:0006749	glutathione metabolic process	3/75	65/18800	0.00223044	0.0168109	0.0121196	IDH1/GSTZ1/SLC1A1	3
BP	GO:0045333	cellular respiration	5/75	231/18800	0.00230244	0.0168589	0.0121542	IDH1/PDHB/ME3/ACO1/SDHA	5
BP	GO:0006085	acetyl-CoA biosynthetic process	2/75	18/18800	0.00230525	0.0168589	0.0121542	ACSS2/PDHB	2
BP	GO:0007625	grooming behavior	2/75	18/18800	0.00230525	0.0168589	0.0121542	DDO/SLC1A1	2
BP	GO:0043649	dicarboxylic acid catabolic process	2/75	18/18800	0.00230525	0.0168589	0.0121542	DDO/GOT1	2
BP	GO:0071071	regulation of phospholipid biosynthetic process	2/75	18/18800	0.00230525	0.0168589	0.0121542	FABP3/IDH1	2
BP	GO:0051384	response to glucocorticoid	4/75	139/18800	0.00231733	0.0168589	0.0121542	CDO1/GOT1/PCK2/ASS1	4
BP	GO:0055076	transition metal ion homeostasis	4/75	139/18800	0.00231733	0.0168589	0.0121542	TFRC/SLC39A8/ACO1/SLC1A1	4
BP	GO:0006081	cellular aldehyde metabolic process	3/75	66/18800	0.00233	0.0168589	0.0121542	IDH1/AKR1A1/TKT	3
BP	GO:0006879	cellular iron ion homeostasis	3/75	66/18800	0.00233	0.0168589	0.0121542	TFRC/SLC39A8/ACO1	3
BP	GO:0033692	cellular polysaccharide biosynthetic process	3/75	67/18800	0.00243228	0.0174592	0.012587	AKT1/UGP2/GCK	3
BP	GO:0062012	regulation of small molecule metabolic process	6/75	342/18800	0.00243442	0.0174592	0.012587	FABP3/AKT1/FBP1/GCK/PGP/FABP5	6
BP	GO:0046503	glycerolipid catabolic process	3/75	68/18800	0.0025373	0.018033	0.0130006	LPL/PNPLA2/MGLL	3
BP	GO:0046165	alcohol biosynthetic process	4/75	143/18800	0.00256811	0.018033	0.0130006	HMGCS1/GOT1/PGP/PCK2	4
BP	GO:0010744	positive regulation of macrophage derived foam cell differentiation	2/75	19/18800	0.00256981	0.018033	0.0130006	CD36/LPL	2
BP	GO:0010885	regulation of cholesterol storage	2/75	19/18800	0.00256981	0.018033	0.0130006	CD36/LPL	2
BP	GO:0035795	negative regulation of mitochondrial membrane permeability	2/75	19/18800	0.00256981	0.018033	0.0130006	SLC25A4/SLC25A5	2
BP	GO:0032370	positive regulation of lipid transport	3/75	69/18800	0.00264509	0.0184816	0.0133241	FABP3/DBI/ACSL1	3
BP	GO:0015748	organophosphate ester transport	4/75	145/18800	0.00270023	0.0187862	0.0135437	DBI/SLC35B2/SLC25A4/SLC25A5	4
BP	GO:0106106	cold-induced thermogenesis	4/75	146/18800	0.00276801	0.0190232	0.0137145	CD36/ACSL1/FABP5/PEMT	4
BP	GO:0120161	regulation of cold-induced thermogenesis	4/75	146/18800	0.00276801	0.0190232	0.0137145	CD36/ACSL1/FABP5/PEMT	4
BP	GO:0010038	response to metal ion	6/75	351/18800	0.00276934	0.0190232	0.0137145	AKT1/FBP1/TFRC/ACO1/SLC1A1/ASS1	6
BP	GO:0009110	vitamin biosynthetic process	2/75	20/18800	0.00284799	0.0194812	0.0140447	PSAT1/AKR1A1	2
BP	GO:1901617	organic hydroxy compound biosynthetic process	5/75	243/18800	0.00286481	0.0195143	0.0140686	PSAT1/HMGCS1/GOT1/PGP/PCK2	5
BP	GO:0010821	regulation of mitochondrion organization	4/75	148/18800	0.00290706	0.0196967	0.0142	AKT1/TFRC/SLC25A4/SLC25A5	4
BP	GO:0042593	glucose homeostasis	5/75	244/18800	0.00291578	0.0196967	0.0142	AKT1/SLC16A1/GCK/PCK2/FABP5	5
BP	GO:0033500	carbohydrate homeostasis	5/75	245/18800	0.00296741	0.0199626	0.0143917	AKT1/SLC16A1/GCK/PCK2/FABP5	5
BP	GO:0010675	regulation of cellular carbohydrate metabolic process	4/75	150/18800	0.00305081	0.0203554	0.014675	AKT1/FBP1/GCK/PGP	4
BP	GO:0098754	detoxification	4/75	150/18800	0.00305081	0.0203554	0.014675	CD36/ABCG2/GSTZ1/AKR1A1	4
BP	GO:0009636	response to toxic substance	5/75	247/18800	0.00307264	0.0204173	0.0147196	CD36/ABCG2/GSTZ1/AKR1A1/ASS1	5
BP	GO:0005977	glycogen metabolic process	3/75	73/18800	0.00310439	0.0204455	0.0147399	AKT1/UGP2/GCK	3
BP	GO:0009070	serine family amino acid biosynthetic process	2/75	21/18800	0.00313967	0.0204455	0.0147399	PSAT1/PSPH	2
BP	GO:0010878	cholesterol storage	2/75	21/18800	0.00313967	0.0204455	0.0147399	CD36/LPL	2
BP	GO:0033762	response to glucagon	2/75	21/18800	0.00313967	0.0204455	0.0147399	CDO1/ASS1	2
BP	GO:0071404	cellular response to low-density lipoprotein particle stimulus	2/75	21/18800	0.00313967	0.0204455	0.0147399	CD36/LPL	2
BP	GO:0000271	polysaccharide biosynthetic process	3/75	74/18800	0.00322637	0.020761	0.0149673	AKT1/UGP2/GCK	3
BP	GO:0006073	cellular glucan metabolic process	3/75	74/18800	0.00322637	0.020761	0.0149673	AKT1/UGP2/GCK	3
BP	GO:0044042	glucan metabolic process	3/75	74/18800	0.00322637	0.020761	0.0149673	AKT1/UGP2/GCK	3
BP	GO:1903428	positive regulation of reactive oxygen species biosynthetic process	2/75	22/18800	0.00344475	0.0219923	0.0158551	CD36/SLC5A3	2
BP	GO:1905709	negative regulation of membrane permeability	2/75	22/18800	0.00344475	0.0219923	0.0158551	SLC25A4/SLC25A5	2
BP	GO:0009165	nucleotide biosynthetic process	5/75	255/18800	0.00352067	0.0223893	0.0161412	ACSS2/PDHB/ACSL1/GCDH/SLC35B2	5
BP	GO:0031960	response to corticosteroid	4/75	157/18800	0.00359218	0.0227552	0.016405	CDO1/GOT1/PCK2/ASS1	4
BP	GO:1901293	nucleoside phosphate biosynthetic process	5/75	257/18800	0.00363966	0.0229665	0.0165574	ACSS2/PDHB/ACSL1/GCDH/SLC35B2	5
BP	GO:0008654	phospholipid biosynthetic process	5/75	258/18800	0.00370022	0.0232585	0.0167679	FABP3/IDH1/HMGCS1/FABP5/PEMT	5
BP	GO:0007422	peripheral nervous system development	3/75	78/18800	0.00374356	0.0234404	0.0168991	AKT1/SLC5A3/ILK	3
BP	GO:0051156	glucose 6-phosphate metabolic process	2/75	24/18800	0.00409464	0.0253463	0.0182731	GCK/TKT	2
BP	GO:0071577	zinc ion transmembrane transport	2/75	24/18800	0.00409464	0.0253463	0.0182731	SLC39A8/SLC1A1	2
BP	GO:1901028	regulation of mitochondrial outer membrane permeabilization involved in apoptotic signaling pathway	2/75	24/18800	0.00409464	0.0253463	0.0182731	SLC25A4/SLC25A5	2
BP	GO:0007159	leukocyte cell-cell adhesion	6/75	381/18800	0.0041393	0.0255257	0.0184024	AKT1/OLR1/ARG2/TFRC/SLC39A8/ASS1	6
BP	GO:0006096	glycolytic process	3/75	81/18800	0.00416278	0.0255736	0.0184369	FBP1/GCK/ADPGK	3
BP	GO:0006757	ATP generation from ADP	3/75	82/18800	0.0043086	0.0263699	0.019011	FBP1/GCK/ADPGK	3
BP	GO:0046949	fatty-acyl-CoA biosynthetic process	2/75	25/18800	0.00443925	0.0269668	0.0194413	ACSL1/GCDH	2
BP	GO:2000193	positive regulation of fatty acid transport	2/75	25/18800	0.00443925	0.0269668	0.0194413	FABP3/ACSL1	2
BP	GO:0055072	iron ion homeostasis	3/75	85/18800	0.00476455	0.0288353	0.0207884	TFRC/SLC39A8/ACO1	3
BP	GO:0071549	cellular response to dexamethasone stimulus	2/75	26/18800	0.00479682	0.028923	0.0208517	PCK2/ASS1	2
BP	GO:0006112	energy reserve metabolic process	3/75	86/18800	0.00492276	0.0295729	0.0213202	AKT1/UGP2/GCK	3
BP	GO:0055088	lipid homeostasis	4/75	173/18800	0.00506732	0.0303185	0.0218577	LPL/FABP3/PNPLA2/GOT1	4
BP	GO:1990542	mitochondrial transmembrane transport	3/75	87/18800	0.00508412	0.0303185	0.0218577	SLC25A4/SLC25A5/SLC39A8	3
BP	GO:0018126	protein hydroxylation	2/75	27/18800	0.00516724	0.0307017	0.022134	PLOD3/PLOD2	2
BP	GO:0046890	regulation of lipid biosynthetic process	4/75	175/18800	0.00527634	0.0312359	0.0225191	FABP3/AKT1/IDH1/FABP5	4
BP	GO:0001659	temperature homeostasis	4/75	177/18800	0.00549106	0.0323874	0.0233493	CD36/ACSL1/FABP5/PEMT	4
BP	GO:0006829	zinc ion transport	2/75	28/18800	0.00555042	0.0323874	0.0233493	SLC39A8/SLC1A1	2
BP	GO:0022011	myelination in peripheral nervous system	2/75	28/18800	0.00555042	0.0323874	0.0233493	AKT1/ILK	2
BP	GO:0032292	peripheral nervous system axon ensheathment	2/75	28/18800	0.00555042	0.0323874	0.0233493	AKT1/ILK	2
BP	GO:0046031	ADP metabolic process	3/75	90/18800	0.00558722	0.0324857	0.0234201	FBP1/GCK/ADPGK	3
BP	GO:0006835	dicarboxylic acid transport	3/75	91/18800	0.00576132	0.0333788	0.024064	SLC1A1/SLC1A4/SLC1A5	3
BP	GO:0019217	regulation of fatty acid metabolic process	3/75	92/18800	0.00593865	0.0339666	0.0244878	FABP3/AKT1/FABP5	3
BP	GO:1900407	regulation of cellular response to oxidative stress	3/75	92/18800	0.00593865	0.0339666	0.0244878	CD36/AKT1/PYCR1	3
BP	GO:0015813	L-glutamate transmembrane transport	2/75	29/18800	0.00594624	0.0339666	0.0244878	SLC1A1/SLC1A4	2
BP	GO:0019674	NAD metabolic process	2/75	29/18800	0.00594624	0.0339666	0.0244878	GCK/PCK2	2
BP	GO:0006109	regulation of carbohydrate metabolic process	4/75	183/18800	0.00617017	0.0351225	0.0253211	AKT1/FBP1/GCK/PGP	4
BP	GO:0006734	NADH metabolic process	2/75	30/18800	0.00635461	0.0360464	0.0259871	GCK/PCK2	2
BP	GO:0005979	regulation of glycogen biosynthetic process	2/75	31/18800	0.00677541	0.0377753	0.0272336	AKT1/GCK	2
BP	GO:0010039	response to iron ion	2/75	31/18800	0.00677541	0.0377753	0.0272336	TFRC/ACO1	2
BP	GO:0010962	regulation of glucan biosynthetic process	2/75	31/18800	0.00677541	0.0377753	0.0272336	AKT1/GCK	2
BP	GO:0014044	Schwann cell development	2/75	31/18800	0.00677541	0.0377753	0.0272336	AKT1/ILK	2
BP	GO:0070633	transepithelial transport	2/75	31/18800	0.00677541	0.0377753	0.0272336	ABCG2/SLC1A1	2
BP	GO:0044264	cellular polysaccharide metabolic process	3/75	97/18800	0.00687424	0.0381954	0.0275365	AKT1/UGP2/GCK	3
BP	GO:0036473	cell death in response to oxidative stress	3/75	98/18800	0.00707125	0.0391565	0.0282293	AKT1/PYCR1/SLC1A1	3
BP	GO:0010743	regulation of macrophage derived foam cell differentiation	2/75	32/18800	0.00720855	0.0396471	0.028583	CD36/LPL	2
BP	GO:0046320	regulation of fatty acid oxidation	2/75	32/18800	0.00720855	0.0396471	0.028583	FABP3/AKT1	2
BP	GO:0006165	nucleoside diphosphate phosphorylation	3/75	99/18800	0.00727159	0.0398591	0.0287359	FBP1/GCK/ADPGK	3
BP	GO:0046939	nucleotide phosphorylation	3/75	100/18800	0.00747528	0.0408381	0.0294417	FBP1/GCK/ADPGK	3
BP	GO:0051930	regulation of sensory perception of pain	2/75	33/18800	0.00765393	0.0414133	0.0298563	FABP5/MGLL	2
BP	GO:0051931	regulation of sensory perception	2/75	33/18800	0.00765393	0.0414133	0.0298563	FABP5/MGLL	2
BP	GO:0000041	transition metal ion transport	3/75	101/18800	0.00768232	0.0414133	0.0298563	TFRC/SLC39A8/SLC1A1	3
BP	GO:1902882	regulation of response to oxidative stress	3/75	101/18800	0.00768232	0.0414133	0.0298563	CD36/AKT1/PYCR1	3
BP	GO:0006650	glycerophospholipid metabolic process	5/75	309/18800	0.00785088	0.0421823	0.0304107	FABP3/DBI/PGP/FABP5/PEMT	5
BP	GO:0009135	purine nucleoside diphosphate metabolic process	3/75	103/18800	0.00810652	0.0430144	0.0310106	FBP1/GCK/ADPGK	3
BP	GO:0009179	purine ribonucleoside diphosphate metabolic process	3/75	103/18800	0.00810652	0.0430144	0.0310106	FBP1/GCK/ADPGK	3
BP	GO:0000423	mitophagy	2/75	34/18800	0.00811143	0.0430144	0.0310106	SLC25A4/SLC25A5	2
BP	GO:0034405	response to fluid shear stress	2/75	34/18800	0.00811143	0.0430144	0.0310106	AKT1/ASS1	2
BP	GO:0006576	cellular biogenic amine metabolic process	3/75	105/18800	0.00854429	0.044919	0.0323837	AZIN1/GCDH/SLC1A1	3
BP	GO:0034308	primary alcohol metabolic process	3/75	105/18800	0.00854429	0.044919	0.0323837	PNPLA2/ACSS2/AKR1A1	3
BP	GO:0071398	cellular response to fatty acid	2/75	35/18800	0.00858097	0.044919	0.0323837	LPL/ASS1	2
BP	GO:0097345	mitochondrial outer membrane permeabilization	2/75	35/18800	0.00858097	0.044919	0.0323837	SLC25A4/SLC25A5	2
BP	GO:1903829	positive regulation of protein localization	6/75	446/18800	0.00875064	0.0456604	0.0329182	AKT1/SLC5A3/GNAI1/GCK/TFRC/PCK2	6
BP	GO:0008637	apoptotic mitochondrial changes	3/75	107/18800	0.00899574	0.0467893	0.0337321	AKT1/SLC25A4/SLC25A5	3
BP	GO:1903146	regulation of autophagy of mitochondrion	2/75	36/18800	0.00906243	0.0469861	0.033874	SLC25A4/SLC25A5	2
BP	GO:0005976	polysaccharide metabolic process	3/75	108/18800	0.00922662	0.0476855	0.0343782	AKT1/UGP2/GCK	3
BP	GO:0006766	vitamin metabolic process	3/75	109/18800	0.00946094	0.0486148	0.0350481	PSAT1/AKR1A1/FPGS	3
BP	GO:0014037	Schwann cell differentiation	2/75	37/18800	0.00955573	0.0486148	0.0350481	AKT1/ILK	2
BP	GO:0032094	response to food	2/75	37/18800	0.00955573	0.0486148	0.0350481	AKT1/SLC16A1	2
BP	GO:0070873	regulation of glycogen metabolic process	2/75	37/18800	0.00955573	0.0486148	0.0350481	AKT1/GCK	2
BP	GO:1903725	regulation of phospholipid metabolic process	2/75	37/18800	0.00955573	0.0486148	0.0350481	FABP3/IDH1	2
BP	GO:0032611	interleukin-1 beta production	3/75	110/18800	0.00969873	0.0490358	0.0353517	CD36/LPL/ARG2	3
BP	GO:0032651	regulation of interleukin-1 beta production	3/75	110/18800	0.00969873	0.0490358	0.0353517	CD36/LPL/ARG2	3
CC	GO:0005759	mitochondrial matrix	16/75	473/19594	2.38994e-11	3.58491e-09	3.09435e-09	HIBADH/ARG2/GSTZ1/ACSS2/PYCR1/PDHB/GCDH/ECHS1/OAT/PC/ME3/SLC25A5/IVD/PCK2/FPGS/SARDH	16
CC	GO:0016324	apical plasma membrane	8/75	358/19594	6.67331e-05	0.00500498	0.00432009	CD36/ABCG2/SLC7A5/SLC16A1/AKR1A1/SLC39A8/SLC1A1/SLC38A3	8
CC	GO:0045177	apical part of cell	8/75	424/19594	0.000213884	0.0106942	0.00923079	CD36/ABCG2/SLC7A5/SLC16A1/AKR1A1/SLC39A8/SLC1A1/SLC38A3	8
CC	GO:0009925	basal plasma membrane	6/75	251/19594	0.000400491	0.0150184	0.0129633	SLC7A5/SLC16A1/TFRC/SLC39A8/SLC1A5/SLC38A3	6
CC	GO:0045178	basal part of cell	6/75	269/19594	0.000577212	0.0173164	0.0149467	SLC7A5/SLC16A1/TFRC/SLC39A8/SLC1A5/SLC38A3	6
CC	GO:0031526	brush border membrane	3/75	55/19594	0.00122488	0.029514	0.0254753	CD36/ABCG2/SLC28A1	3
CC	GO:0030173	integral component of Golgi membrane	3/75	62/19594	0.00173225	0.029514	0.0254753	SLC35B1/SLC35A2/SLC35B2	3
CC	GO:0016323	basolateral plasma membrane	5/75	226/19594	0.00175009	0.029514	0.0254753	SLC7A5/SLC16A1/TFRC/SLC39A8/SLC38A3	5
CC	GO:0005777	peroxisome	4/75	141/19594	0.00210298	0.029514	0.0254753	IDH1/DDO/ACSL1/TKT	4
CC	GO:0042579	microbody	4/75	141/19594	0.00210298	0.029514	0.0254753	IDH1/DDO/ACSL1/TKT	4
CC	GO:0031228	intrinsic component of Golgi membrane	3/75	67/19594	0.00216436	0.029514	0.0254753	SLC35B1/SLC35A2/SLC35B2	3
MF	GO:0008514	organic anion transmembrane transporter activity	14/75	186/18410	2.30775e-14	6.00015e-12	3.47377e-12	CD36/ABCG2/SLC7A5/SLC35B1/SLC16A1/SLC35B2/SLC25A4/SLC25A5/SLC39A8/SLC1A1/SLC35D2/SLC1A4/SLC1A5/SLC38A3	14
MF	GO:0015291	secondary active transmembrane transporter activity	13/75	240/18410	1.40433e-11	1.82563e-09	1.05695e-09	SLC5A3/SLC7A5/SLC28A1/SLC16A1/SLC25A4/SLC25A5/SLC39A8/SLC1A1/SLC35D2/SLC1A4/SLC35C1/SLC1A5/SLC38A3	13
MF	GO:0015932	nucleobase-containing compound transmembrane transporter activity	8/75	50/18410	2.41897e-11	1.97073e-09	1.14095e-09	SLC35B1/SLC28A1/SLC35A2/SLC35B2/SLC25A4/SLC25A5/SLC35D2/SLC35C1	8
MF	GO:0008509	anion transmembrane transporter activity	14/75	315/18410	3.03189e-11	1.97073e-09	1.14095e-09	CD36/ABCG2/SLC7A5/SLC35B1/SLC16A1/SLC35B2/SLC25A4/SLC25A5/SLC39A8/SLC1A1/SLC35D2/SLC1A4/SLC1A5/SLC38A3	14
MF	GO:1901505	carbohydrate derivative transmembrane transporter activity	8/75	53/18410	3.95478e-11	2.05649e-09	1.1906e-09	SLC35B1/SLC28A1/SLC35A2/SLC35B2/SLC25A4/SLC25A5/SLC35D2/SLC35C1	8
MF	GO:0022804	active transmembrane transporter activity	14/75	404/18410	7.9754e-10	3.456e-08	2.00084e-08	ABCG2/SLC5A3/SLC7A5/SLC28A1/SLC16A1/SLC25A4/SLC25A5/SLC39A8/SLC1A1/SLC35D2/SLC1A4/SLC35C1/SLC1A5/SLC38A3	14
MF	GO:0019842	vitamin binding	9/75	148/18410	8.78166e-09	3.26176e-07	1.88839e-07	GCAT/PSAT1/GOT1/SCLY/PLOD3/OAT/PC/PLOD2/TKT	9
MF	GO:0043177	organic acid binding	8/75	141/18410	1.06166e-07	3.24893e-06	1.88096e-06	FABP3/SCLY/PLOD3/PC/PLOD2/SLC1A1/ASS1/FABP5	8
MF	GO:0005338	nucleotide-sugar transmembrane transporter activity	4/75	12/18410	1.22672e-07	3.24893e-06	1.88096e-06	SLC35B1/SLC35A2/SLC35D2/SLC35C1	4
MF	GO:0015293	symporter activity	8/75	144/18410	1.24959e-07	3.24893e-06	1.88096e-06	SLC5A3/SLC28A1/SLC16A1/SLC39A8/SLC1A1/SLC1A4/SLC1A5/SLC38A3	8
MF	GO:0046943	carboxylic acid transmembrane transporter activity	8/75	164/18410	3.3969e-07	7.70992e-06	4.46364e-06	CD36/ABCG2/SLC7A5/SLC16A1/SLC1A1/SLC1A4/SLC1A5/SLC38A3	8
MF	GO:0005342	organic acid transmembrane transporter activity	8/75	165/18410	3.55842e-07	7.70992e-06	4.46364e-06	CD36/ABCG2/SLC7A5/SLC16A1/SLC1A1/SLC1A4/SLC1A5/SLC38A3	8
MF	GO:0015175	neutral amino acid transmembrane transporter activity	5/75	41/18410	6.5508e-07	1.31016e-05	7.58513e-06	SLC7A5/SLC1A1/SLC1A4/SLC1A5/SLC38A3	5
MF	GO:0016829	lyase activity	8/75	195/18410	1.26198e-06	2.34367e-05	1.35686e-05	ASL/AZIN1/GOT1/SCLY/ECHS1/ME3/ACO1/PCK2	8
MF	GO:0070279	vitamin B6 binding	5/75	56/18410	3.18409e-06	5.51909e-05	3.19526e-05	GCAT/PSAT1/GOT1/SCLY/OAT	5
MF	GO:0015179	L-amino acid transmembrane transporter activity	5/75	61/18410	4.88114e-06	7.93185e-05	4.59212e-05	SLC7A5/SLC1A1/SLC1A4/SLC1A5/SLC38A3	5
MF	GO:0015165	pyrimidine nucleotide-sugar transmembrane transporter activity	3/75	10/18410	7.63447e-06	0.000116763	6.75993e-05	SLC35B1/SLC35A2/SLC35D2	3
MF	GO:0048029	monosaccharide binding	5/75	71/18410	1.03497e-05	0.00014695	8.50762e-05	FBP1/UGP2/GCK/PLOD3/PLOD2	5
MF	GO:0016831	carboxy-lyase activity	4/75	34/18410	1.07386e-05	0.00014695	8.50762e-05	AZIN1/GOT1/ME3/PCK2	4
MF	GO:0015171	amino acid transmembrane transporter activity	5/75	84/18410	2.35517e-05	0.000306172	0.000177257	SLC7A5/SLC1A1/SLC1A4/SLC1A5/SLC38A3	5
MF	GO:0015297	antiporter activity	5/75	89/18410	3.11687e-05	0.000385898	0.000223415	SLC25A4/SLC25A5/SLC35D2/SLC35C1/SLC38A3	5
MF	GO:0015172	acidic amino acid transmembrane transporter activity	3/75	16/18410	3.50059e-05	0.000395719	0.0002291	SLC1A1/SLC1A4/SLC1A5	3
MF	GO:0015556	C4-dicarboxylate transmembrane transporter activity	3/75	16/18410	3.50059e-05	0.000395719	0.0002291	SLC1A1/SLC1A4/SLC1A5	3
MF	GO:0000295	adenine nucleotide transmembrane transporter activity	3/75	18/18410	5.07104e-05	0.000507624	0.000293888	SLC35B2/SLC25A4/SLC25A5	3
MF	GO:0005346	purine ribonucleotide transmembrane transporter activity	3/75	18/18410	5.07104e-05	0.000507624	0.000293888	SLC35B2/SLC25A4/SLC25A5	3
MF	GO:0016830	carbon-carbon lyase activity	4/75	50/18410	5.07624e-05	0.000507624	0.000293888	AZIN1/GOT1/ME3/PCK2	4
MF	GO:0016874	ligase activity	6/75	165/18410	5.71624e-05	0.000550453	0.000318683	ASNSD1/ACSS2/ACSL1/PC/FPGS/ASS1	6
MF	GO:1901682	sulfur compound transmembrane transporter activity	4/75	52/18410	5.93066e-05	0.000550704	0.000318829	ABCG2/SLC35B2/SLC1A1/SLC1A4	4
MF	GO:0030170	pyridoxal phosphate binding	4/75	55/18410	7.40269e-05	0.000644262	0.000372994	GCAT/PSAT1/GOT1/OAT	4
MF	GO:0031406	carboxylic acid binding	6/75	173/18410	7.4338e-05	0.000644262	0.000372994	FABP3/PLOD3/PC/PLOD2/SLC1A1/FABP5	6
MF	GO:0015216	purine nucleotide transmembrane transporter activity	3/75	21/18410	8.19294e-05	0.00068715	0.000397824	SLC35B2/SLC25A4/SLC25A5	3
MF	GO:0008483	transaminase activity	3/75	23/18410	0.000108458	0.000881222	0.000510181	PSAT1/GOT1/OAT	3
MF	GO:0030246	carbohydrate binding	7/75	270/18410	0.000114491	0.000902046	0.000522237	OLR1/FBP1/GALM/UGP2/GCK/PLOD3/PLOD2	7
MF	GO:0016769	transferase activity, transferring nitrogenous groups	3/75	24/18410	0.00012359	0.000945097	0.000547162	PSAT1/GOT1/OAT	3
MF	GO:0015215	nucleotide transmembrane transporter activity	3/75	27/18410	0.000177045	0.00131519	0.000761425	SLC35B2/SLC25A4/SLC25A5	3
MF	GO:0005310	dicarboxylic acid transmembrane transporter activity	3/75	30/18410	0.000243596	0.0017593	0.00101854	SLC1A1/SLC1A4/SLC1A5	3
MF	GO:0015605	organophosphate ester transmembrane transporter activity	3/75	32/18410	0.000295859	0.00207901	0.00120364	SLC35B2/SLC25A4/SLC25A5	3
MF	GO:0050660	flavin adenine dinucleotide binding	4/75	85/18410	0.00040078	0.00274218	0.00158758	DDO/GCDH/IVD/SDHA	4
MF	GO:0022853	active ion transmembrane transporter activity	6/75	254/18410	0.000590924	0.00393949	0.00228076	SLC5A3/SLC28A1/SLC25A4/SLC25A5/SLC39A8/SLC1A1	6
MF	GO:0004465	lipoprotein lipase activity	2/75	10/18410	0.000721495	0.00457533	0.00264888	LPL/PNPLA2	2
MF	GO:0015173	aromatic amino acid transmembrane transporter activity	2/75	10/18410	0.000721495	0.00457533	0.00264888	SLC7A5/SLC38A3	2
MF	GO:0015294	solute:cation symporter activity	4/75	104/18410	0.000858636	0.00486533	0.00281677	SLC5A3/SLC28A1/SLC39A8/SLC1A1	4
MF	GO:0005347	ATP transmembrane transporter activity	2/75	11/18410	0.000879501	0.00486533	0.00281677	SLC25A4/SLC25A5	2
MF	GO:0005536	glucose binding	2/75	11/18410	0.000879501	0.00486533	0.00281677	UGP2/GCK	2
MF	GO:0016857	racemase and epimerase activity, acting on carbohydrates and derivatives	2/75	11/18410	0.000879501	0.00486533	0.00281677	GALM/GALE	2
MF	GO:0022889	serine transmembrane transporter activity	2/75	11/18410	0.000879501	0.00486533	0.00281677	SLC1A4/SLC1A5	2
MF	GO:1901474	azole transmembrane transporter activity	2/75	11/18410	0.000879501	0.00486533	0.00281677	SLC28A1/SLC38A3	2
MF	GO:0016879	ligase activity, forming carbon-nitrogen bonds	3/75	48/18410	0.000984577	0.00533312	0.0030876	ASNSD1/FPGS/ASS1	3
MF	GO:0003995	acyl-CoA dehydrogenase activity	2/75	12/18410	0.00105262	0.00547362	0.00316894	GCDH/IVD	2
MF	GO:0022858	alanine transmembrane transporter activity	2/75	12/18410	0.00105262	0.00547362	0.00316894	SLC1A4/SLC38A3	2
MF	GO:0051287	NAD binding	3/75	51/18410	0.00117514	0.0059909	0.00346841	IDH1/HIBADH/ME3	3
MF	GO:0050661	NADP binding	3/75	53/18410	0.00131422	0.00657112	0.00380433	IDH1/HIBADH/ME3	3
MF	GO:0016597	amino acid binding	3/75	56/18410	0.00154158	0.00756249	0.00437828	SCLY/SLC1A1/ASS1	3
MF	GO:0005041	low-density lipoprotein particle receptor activity	2/75	15/18410	0.00166142	0.00785397	0.00454703	CD36/OLR1	2
MF	GO:0016208	AMP binding	2/75	15/18410	0.00166142	0.00785397	0.00454703	FBP1/ACSS2	2
MF	GO:0008028	monocarboxylic acid transmembrane transporter activity	3/75	59/18410	0.00179218	0.00817487	0.00473282	CD36/ABCG2/SLC16A1	3
MF	GO:0016627	oxidoreductase activity, acting on the CH-CH group of donors	3/75	59/18410	0.00179218	0.00817487	0.00473282	GCDH/IVD/SDHA	3
MF	GO:0016616	oxidoreductase activity, acting on the CH-OH group of donors, NAD or NADP as acceptor	4/75	128/18410	0.00185106	0.00829785	0.00480402	IDH1/HIBADH/ME3/AKR1A1	4
MF	GO:0000287	magnesium ion binding	5/75	222/18410	0.00212085	0.00912391	0.00528227	IDH1/GNAI1/PSPH/PGP/TKT	5
MF	GO:0005324	long-chain fatty acid transporter activity	2/75	17/18410	0.00214061	0.00912391	0.00528227	CD36/FABP5	2
MF	GO:0016854	racemase and epimerase activity	2/75	17/18410	0.00214061	0.00912391	0.00528227	GALM/GALE	2
MF	GO:0030228	lipoprotein particle receptor activity	2/75	18/18410	0.00240185	0.0100723	0.00583131	CD36/OLR1	2
MF	GO:0016614	oxidoreductase activity, acting on CH-OH group of donors	4/75	140/18410	0.0025642	0.0105824	0.00612666	IDH1/HIBADH/ME3/AKR1A1	4
MF	GO:0031418	L-ascorbic acid binding	2/75	20/18410	0.00296701	0.0120535	0.00697834	PLOD3/PLOD2	2
MF	GO:0015370	solute:sodium symporter activity	3/75	72/18410	0.00316586	0.0126634	0.00733146	SLC5A3/SLC28A1/SLC1A1	3
MF	GO:0000062	fatty-acyl-CoA binding	2/75	22/18410	0.00358832	0.0141358	0.00818388	DBI/GCDH	2
MF	GO:0016853	isomerase activity	4/75	155/18410	0.00369596	0.0143425	0.00830357	GSTZ1/GALM/THAP4/GALE	4
MF	GO:1901567	fatty acid derivative binding	2/75	23/18410	0.00391973	0.0149872	0.00867681	DBI/GCDH	2
MF	GO:0038024	cargo receptor activity	3/75	79/18410	0.00411326	0.0154992	0.00897323	CD36/OLR1/TFRC	3
MF	GO:0033293	monocarboxylic acid binding	3/75	81/18410	0.00441219	0.0163881	0.00948788	FABP3/PC/FABP5	3
MF	GO:0120227	acyl-CoA binding	2/75	25/18410	0.00462352	0.0168672	0.00976519	DBI/GCDH	2
MF	GO:1901681	sulfur compound binding	5/75	267/18410	0.0046709	0.0168672	0.00976519	LPL/DBI/GCDH/PC/TKT	5
MF	GO:0004806	triglyceride lipase activity	2/75	26/18410	0.00499566	0.0177927	0.0103011	LPL/PNPLA2	2
MF	GO:0016405	CoA-ligase activity	2/75	27/18410	0.00538114	0.0189067	0.010946	ACSS2/ACSL1	2
MF	GO:0016645	oxidoreductase activity, acting on the CH-NH group of donors	2/75	29/18410	0.00619172	0.0214646	0.0124269	PYCR1/SARDH	2
MF	GO:0051213	dioxygenase activity	3/75	93/18410	0.00648123	0.0221726	0.0128368	CDO1/PLOD3/PLOD2	3
MF	GO:0016878	acid-thiol ligase activity	2/75	31/18410	0.00705436	0.0232169	0.0134413	ACSS2/ACSL1	2
MF	GO:0071813	lipoprotein particle binding	2/75	31/18410	0.00705436	0.0232169	0.0134413	CD36/LPL	2
MF	GO:0071814	protein-lipid complex binding	2/75	31/18410	0.00705436	0.0232169	0.0134413	CD36/LPL	2
MF	GO:0042887	amide transmembrane transporter activity	2/75	35/18410	0.00893232	0.02903	0.0168069	ABCG2/SLC38A3	2
MF	GO:0016620	oxidoreductase activity, acting on the aldehyde or oxo group of donors, NAD or NADP as acceptor	2/75	38/18410	0.010471	0.0336106	0.0194588	PDHB/ALDH18A1	2
MF	GO:0016877	ligase activity, forming carbon-sulfur bonds	2/75	41/18410	0.0121181	0.0384233	0.0222451	ACSS2/ACSL1	2
MF	GO:0015078	proton transmembrane transporter activity	3/75	120/18410	0.0129741	0.0406419	0.0235295	SLC25A4/SLC25A5/SLC39A8	3
MF	GO:0016903	oxidoreductase activity, acting on the aldehyde or oxo group of donors	2/75	46/18410	0.0150967	0.046728	0.027053	PDHB/ALDH18A1	2
MF	GO:0016298	lipase activity	3/75	130/18410	0.0160585	0.0491201	0.028438	LPL/PNPLA2/MGLL	3

## Sheet: KEGG
ID	Description	GeneRatio	BgRatio	pvalue	p.adjust	qvalue	geneID	Count
chx01200	Carbon metabolism	16/63	116/8909	5.19533e-17	9.76723e-15	7.82035e-15	IDH1/PSAT1/FBP1/ACSS2/PDHB/PSPH/GOT1/GCK/PGP/ECHS1/PC/ME3/ACO1/ADPGK/SDHA/TKT	16
chx01230	Biosynthesis of amino acids	12/63	75/8909	9.62535e-14	9.04783e-12	7.24435e-12	ASL/IDH1/PSAT1/ARG2/PYCR1/PSPH/GOT1/ALDH18A1/PC/ACO1/ASS1/TKT	12
chx03320	PPAR signaling pathway	12/63	88/8909	7.06021e-13	4.4244e-11	3.54249e-11	CD36/PLIN2/LPL/FABP3/DBI/OLR1/HMGCS1/ACSL1/ME3/PCK2/FABP5/ILK	12
chx00010	Glycolysis / Gluconeogenesis	8/63	68/8909	2.09607e-08	9.85154e-07	7.88785e-07	FBP1/GALM/ACSS2/PDHB/GCK/AKR1A1/PCK2/ADPGK	8
chx00020	Citrate cycle (TCA cycle)	6/63	30/8909	5.09951e-08	1.91742e-06	1.53522e-06	IDH1/PDHB/PC/ACO1/PCK2/SDHA	6
chx00620	Pyruvate metabolism	6/63	48/8909	9.54584e-07	2.99103e-05	2.39483e-05	ACSS2/PDHB/PC/ME3/AKR1A1/PCK2	6
chx05230	Central carbon metabolism in cancer	6/63	68/8909	7.62781e-06	0.000204861	0.000164027	AKT1/IDH1/SLC7A5/PDHB/GCK/SLC1A5	6
chx00220	Arginine biosynthesis	4/63	20/8909	1.01063e-05	0.000237497	0.000190158	ASL/ARG2/GOT1/ASS1	4
chx00330	Arginine and proline metabolism	5/63	54/8909	3.64574e-05	0.000761555	0.000609756	ARG2/PYCR1/GOT1/ALDH18A1/OAT	5
chx00052	Galactose metabolism	4/63	31/8909	6.19166e-05	0.00116403	0.000932008	GALM/UGP2/GCK/GALE	4
chx00250	Alanine, aspartate and glutamate metabolism	4/63	40/8909	0.000171471	0.0029306	0.00234645	ASL/DDO/GOT1/ASS1	4
chx01210	2-Oxocarboxylic acid metabolism	3/63	18/8909	0.000254959	0.00399436	0.00319817	IDH1/GOT1/ACO1	3
chx00260	Glycine, serine and threonine metabolism	4/63	47/8909	0.000322502	0.00466387	0.00373423	GCAT/PSAT1/PSPH/SARDH	4
chx00280	Valine, leucine and isoleucine degradation	4/63	56/8909	0.000633275	0.00850398	0.0068089	HIBADH/HMGCS1/ECHS1/IVD	4
chx04922	Glucagon signaling pathway	5/63	105/8909	0.000844524	0.0102972	0.00824464	AKT1/FBP1/PDHB/GCK/PCK2	5
chx04923	Regulation of lipolysis in adipocytes	4/63	61/8909	0.000876353	0.0102972	0.00824464	PNPLA2/AKT1/GNAI1/MGLL	4
chx00310	Lysine degradation	4/63	67/8909	0.00124709	0.0137913	0.0110423	GCDH/PLOD3/ECHS1/PLOD2	4
chx00630	Glyoxylate and dicarboxylate metabolism	3/63	32/8909	0.00144421	0.015084	0.0120773	ACSS2/PGP/ACO1	3
chx04920	Adipocytokine signaling pathway	4/63	71/8909	0.00154793	0.0153163	0.0122633	CD36/AKT1/ACSL1/PCK2	4
chx00561	Glycerolipid metabolism	4/63	72/8909	0.00163037	0.0153255	0.0122707	LPL/PNPLA2/AKR1A1/MGLL	4
chx01250	Biosynthesis of nucleotide sugars	3/63	39/8909	0.00256907	0.0229993	0.0184149	UGP2/GCK/GALE	3
chx05415	Diabetic cardiomyopathy	6/63	219/8909	0.00435621	0.0372258	0.0298056	CD36/AKT1/PDHB/SLC25A4/SLC25A5/SDHA	6
chx04216	Ferroptosis	3/63	48/8909	0.0046476	0.0379891	0.0304168	ACSL1/TFRC/SLC39A8	3
chx00270	Cysteine and methionine metabolism	3/63	50/8909	0.00521425	0.0408449	0.0327034	PSAT1/CDO1/GOT1	3
chx00071	Fatty acid degradation	3/63	52/8909	0.0058208	0.0437724	0.0350473	ACSL1/GCDH/ECHS1	3
chx00520	Amino sugar and nucleotide sugar metabolism	3/63	53/8909	0.00613927	0.0443917	0.0355431	UGP2/GCK/GALE	3
chx04964	Proximal tubule bicarbonate reclamation	2/63	23/8909	0.0113166	0.0781083	0.0625391	PCK2/SLC38A3	2
chx04152	AMPK signaling pathway	4/63	125/8909	0.0116331	0.0781083	0.0625391	CD36/AKT1/FBP1/PCK2	4
chx04910	Insulin signaling pathway	4/63	139/8909	0.0166175	0.107727	0.0862543	AKT1/FBP1/GCK/PCK2	4
chx00030	Pentose phosphate pathway	2/63	29/8909	0.017674	0.110757	0.0886803	FBP1/TKT	2
chx00650	Butanoate metabolism	2/63	30/8909	0.0188512	0.114323	0.0915354	HMGCS1/ECHS1	2
chx00640	Propanoate metabolism	2/63	31/8909	0.0200605	0.114443	0.0916312	ACSS2/ECHS1	2
chx04146	Peroxisome	3/63	82/8909	0.0200884	0.114443	0.0916312	IDH1/DDO/ACSL1	3
chx00500	Starch and sucrose metabolism	2/63	33/8909	0.0225739	0.124821	0.0999404	UGP2/GCK	2
chx05208	Chemical carcinogenesis - reactive oxygen species	5/63	237/8909	0.025711	0.138105	0.110576	AKT1/SLC25A4/AKR1A1/SLC25A5/SDHA	5
chx01240	Biosynthesis of cofactors	4/63	162/8909	0.0273772	0.142097	0.113773	PSAT1/UGP2/AKR1A1/FPGS	4
chx00040	Pentose and glucuronate interconversions	2/63	37/8909	0.0279658	0.142097	0.113773	UGP2/AKR1A1	2
chx04022	cGMP-PKG signaling pathway	4/63	168/8909	0.0307363	0.152064	0.121753	AKT1/GNAI1/SLC25A4/SLC25A5	4
chx00350	Tyrosine metabolism	2/63	44/8909	0.0384946	0.180924	0.144861	GSTZ1/GOT1	2
chx01523	Antifolate resistance	2/63	44/8909	0.0384946	0.180924	0.144861	ABCG2/FPGS	2
chx05012	Parkinson disease	5/63	271/8909	0.0421713	0.193371	0.154827	GNAI1/SLC25A4/SLC25A5/SLC39A8/SDHA	5
chx04724	Glutamatergic synapse	3/63	111/8909	0.0436039	0.194733	0.155918	GNAI1/SLC1A1/SLC38A3	3
chx04066	HIF-1 signaling pathway	3/63	112/8909	0.0445844	0.194733	0.155918	AKT1/PDHB/TFRC	3
chx04931	Insulin resistance	3/63	113/8909	0.0455759	0.194733	0.155918	CD36/AKT1/PCK2	3
chx00380	Tryptophan metabolism	2/63	49/8909	0.0467951	0.195499	0.156531	GCDH/ECHS1	2
chx04979	Cholesterol metabolism	2/63	51/8909	0.0502833	0.205506	0.164543	CD36/LPL	2
chx05010	Alzheimer disease	6/63	387/8909	0.0549128	0.219651	0.175869	LPL/AKT1/SLC25A4/SLC25A5/SLC39A8/SDHA	6
chx05213	Endometrial cancer	2/63	58/8909	0.0631892	0.247491	0.198159	AKT1/ILK	2
chx01212	Fatty acid metabolism	2/63	61/8909	0.0690292	0.264847	0.212055	ACSL1/ECHS1	2
chx05017	Spinocerebellar ataxia	3/63	144/8909	0.0815292	0.30655	0.245446	AKT1/SLC25A4/SLC25A5	3
chx04714	Thermogenesis	4/63	237/8909	0.0862877	0.31808	0.254678	PNPLA2/ACSL1/SDHA/MGLL	4
chx04917	Prolactin signaling pathway	2/63	81/8909	0.111887	0.388119	0.310756	AKT1/GCK	2
chx04218	Cellular senescence	3/63	166/8909	0.112587	0.388119	0.310756	AKT1/SLC25A4/SLC25A5	3
chx00061	Fatty acid biosynthesis	1/63	17/8909	0.113746	0.388119	0.310756	ACSL1	1
chx00450	Selenocompound metabolism	1/63	17/8909	0.113746	0.388119	0.310756	SCLY	1
chx04145	Phagosome	3/63	168/8909	0.11561	0.388119	0.310756	CD36/OLR1/TFRC	3
chx05164	Influenza A	3/63	177/8909	0.12959	0.422051	0.337924	AKT1/SLC25A4/SLC25A5	3
chx04727	GABAergic synapse	2/63	89/8909	0.130575	0.422051	0.337924	GNAI1/SLC38A3	2
chx00430	Taurine and hypotaurine metabolism	1/63	20/8909	0.132452	0.422051	0.337924	CDO1	1
chx04914	Progesterone-mediated oocyte maturation	2/63	92/8909	0.137762	0.427163	0.342017	AKT1/GNAI1	2
chx00900	Terpenoid backbone biosynthesis	1/63	21/8909	0.138601	0.427163	0.342017	HMGCS1	1
chx00360	Phenylalanine metabolism	1/63	23/8909	0.15077	0.457173	0.366045	GOT1	1
chx04950	Maturity onset diabetes of the young	1/63	26/8909	0.168707	0.503442	0.403092	GCK	1
chx04640	Hematopoietic cell lineage	2/63	107/8909	0.174863	0.510541	0.408776	CD36/TFRC	2
chx04613	Neutrophil extracellular trap formation	3/63	205/8909	0.176517	0.510541	0.408776	AKT1/SLC25A4/SLC25A5	3
chx04725	Cholinergic synapse	2/63	111/8909	0.185021	0.525027	0.420374	AKT1/GNAI1	2
chx05142	Chagas disease	2/63	113/8909	0.190133	0.525027	0.420374	AKT1/GNAI1	2
chx00062	Fatty acid elongation	1/63	30/8909	0.192044	0.525027	0.420374	ECHS1	1
chx05145	Toxoplasmosis	2/63	114/8909	0.192696	0.525027	0.420374	AKT1/GNAI1	2
chx04935	Growth hormone synthesis, secretion and action	2/63	118/8909	0.202996	0.545188	0.436517	AKT1/GNAI1	2
chx04071	Sphingolipid signaling pathway	2/63	120/8909	0.20817	0.546041	0.4372	AKT1/GNAI1	2
chx00051	Fructose and mannose metabolism	1/63	33/8909	0.209122	0.546041	0.4372	FBP1	1
chx00053	Ascorbate and aldarate metabolism	1/63	34/8909	0.214736	0.553018	0.442786	AKR1A1	1
chx05417	Lipid and atherosclerosis	3/63	229/8909	0.219967	0.558836	0.447444	CD36/AKT1/OLR1	3
chx04611	Platelet activation	2/63	128/8909	0.228999	0.565502	0.452781	AKT1/GNAI1	2
chx00410	beta-Alanine metabolism	1/63	37/8909	0.231342	0.565502	0.452781	ECHS1	1
chx04068	FoxO signaling pathway	2/63	129/8909	0.231615	0.565502	0.452781	AKT1/PCK2	2
chx05166	Human T-cell leukemia virus 1 infection	3/63	237/8909	0.234934	0.566251	0.453381	AKT1/SLC25A4/SLC25A5	3
chx04728	Dopaminergic synapse	2/63	133/8909	0.242097	0.575097	0.460464	AKT1/GNAI1	2
chx04926	Relaxin signaling pathway	2/63	134/8909	0.244722	0.575097	0.460464	AKT1/GNAI1	2
chx04915	Estrogen signaling pathway	2/63	136/8909	0.249975	0.58019	0.464542	AKT1/GNAI1	2
chx04371	Apelin signaling pathway	2/63	139/8909	0.257863	0.584961	0.468362	AKT1/GNAI1	2
chx00790	Folate biosynthesis	1/63	42/8909	0.258254	0.584961	0.468362	FPGS	1
chx05418	Fluid shear stress and atherosclerosis	2/63	144/8909	0.27102	0.600414	0.480735	AKT1/ASS1	2
chx04723	Retrograde endocannabinoid signaling	2/63	145/8909	0.273652	0.600414	0.480735	GNAI1/MGLL	2
chx04974	Protein digestion and absorption	2/63	147/8909	0.278915	0.600414	0.480735	SLC1A1/SLC1A5	2
chx04930	Type II diabetes mellitus	1/63	46/8909	0.279114	0.600414	0.480735	GCK	1
chx00514	Other types of O-glycan biosynthesis	1/63	47/8909	0.284239	0.600414	0.480735	PLOD3	1
chx04973	Carbohydrate digestion and absorption	1/63	47/8909	0.284239	0.600414	0.480735	AKT1	1
chx04261	Adrenergic signaling in cardiomyocytes	2/63	151/8909	0.289434	0.604596	0.484083	AKT1/GNAI1	2
chx05030	Cocaine addiction	1/63	50/8909	0.299397	0.613485	0.491201	GNAI1	1
chx05020	Prion disease	3/63	271/8909	0.300216	0.613485	0.491201	SLC25A4/SLC25A5/SDHA	3
chx04932	Non-alcoholic fatty liver disease	2/63	157/8909	0.305185	0.614311	0.491862	AKT1/SDHA	2
chx05144	Malaria	1/63	52/8909	0.309327	0.614311	0.491862	CD36	1
chx04150	mTOR signaling pathway	2/63	159/8909	0.310423	0.614311	0.491862	AKT1/SLC7A5	2
chx04370	VEGF signaling pathway	1/63	56/8909	0.328772	0.643846	0.515509	AKT1	1
chx04975	Fat digestion and absorption	1/63	57/8909	0.333549	0.646466	0.517607	CD36	1
chx04217	Necroptosis	2/63	170/8909	0.339085	0.65049	0.520829	SLC25A4/SLC25A5	2
chx04730	Long-term depression	1/63	60/8909	0.347679	0.657249	0.526241	GNAI1	1
chx04213	Longevity regulating pathway - multiple species	1/63	62/8909	0.356935	0.657249	0.526241	AKT1	1
chx00480	Glutathione metabolism	1/63	63/8909	0.361514	0.657249	0.526241	IDH1	1
chx04360	Axon guidance	2/63	180/8909	0.364846	0.657249	0.526241	GNAI1/ILK	2
chx02010	ABC transporters	1/63	64/8909	0.366061	0.657249	0.526241	ABCG2	1
chx04929	GnRH secretion	1/63	64/8909	0.366061	0.657249	0.526241	AKT1	1
chx05016	Huntington disease	3/63	307/8909	0.370406	0.657249	0.526241	SLC25A4/SLC25A5/SDHA	3
chx04664	Fc epsilon RI signaling pathway	1/63	65/8909	0.370577	0.657249	0.526241	AKT1	1
chx04062	Chemokine signaling pathway	2/63	188/8909	0.385192	0.66368	0.53139	AKT1/GNAI1	2
chx04662	B cell receptor signaling pathway	1/63	69/8909	0.388324	0.66368	0.53139	AKT1	1
chx05211	Renal cell carcinoma	1/63	69/8909	0.388324	0.66368	0.53139	AKT1	1
chx05221	Acute myeloid leukemia	1/63	69/8909	0.388324	0.66368	0.53139	AKT1	1
chx05218	Melanoma	1/63	72/8909	0.40131	0.664309	0.531894	AKT1	1
chx05223	Non-small cell lung cancer	1/63	72/8909	0.40131	0.664309	0.531894	AKT1	1
chx04924	Renin secretion	1/63	73/8909	0.405578	0.664309	0.531894	GNAI1	1
chx05214	Glioma	1/63	74/8909	0.409816	0.664309	0.531894	AKT1	1
chx04721	Synaptic vesicle cycle	1/63	78/8909	0.426474	0.664309	0.531894	SLC1A1	1
chx05100	Bacterial invasion of epithelial cells	1/63	78/8909	0.426474	0.664309	0.531894	ILK	1
chx05133	Pertussis	1/63	78/8909	0.426474	0.664309	0.531894	GNAI1	1
chx05212	Pancreatic cancer	1/63	78/8909	0.426474	0.664309	0.531894	AKT1	1
chx05220	Chronic myeloid leukemia	1/63	78/8909	0.426474	0.664309	0.531894	AKT1	1
chx04510	Focal adhesion	2/63	205/8909	0.427486	0.664309	0.531894	AKT1/ILK	2
chx04971	Gastric acid secretion	1/63	79/8909	0.430565	0.664309	0.531894	GNAI1	1
chx01521	EGFR tyrosine kinase inhibitor resistance	1/63	80/8909	0.434628	0.664309	0.531894	AKT1	1
chx01524	Platinum drug resistance	1/63	80/8909	0.434628	0.664309	0.531894	AKT1	1
chx04015	Rap1 signaling pathway	2/63	211/8909	0.442065	0.665892	0.533161	AKT1/GNAI1	2
chx04012	ErbB signaling pathway	1/63	85/8909	0.454518	0.665892	0.533161	AKT1	1
chx04911	Insulin secretion	1/63	87/8909	0.462279	0.665892	0.533161	GCK	1
chx05207	Chemical carcinogenesis - receptor activation	2/63	220/8909	0.463558	0.665892	0.533161	AKT1/GNAI1	2
chx04540	Gap junction	1/63	88/8909	0.466119	0.665892	0.533161	GNAI1	1
chx05235	PD-L1 expression and PD-1 checkpoint pathway in cancer	1/63	88/8909	0.466119	0.665892	0.533161	AKT1	1
chx04211	Longevity regulating pathway	1/63	89/8909	0.469932	0.665892	0.533161	AKT1	1
chx05210	Colorectal cancer	1/63	89/8909	0.469932	0.665892	0.533161	AKT1	1
chx05032	Morphine addiction	1/63	91/8909	0.477478	0.665892	0.533161	GNAI1	1
chx05170	Human immunodeficiency virus 1 infection	2/63	231/8909	0.489179	0.665892	0.533161	AKT1/GNAI1	2
chx01522	Endocrine resistance	1/63	96/8909	0.495883	0.665892	0.533161	AKT1	1
chx04512	ECM-receptor interaction	1/63	96/8909	0.495883	0.665892	0.533161	CD36	1
chx05222	Small cell lung cancer	1/63	96/8909	0.495883	0.665892	0.533161	AKT1	1
chx04666	Fc gamma R-mediated phagocytosis	1/63	97/8909	0.499487	0.665892	0.533161	AKT1	1
chx05215	Prostate cancer	1/63	97/8909	0.499487	0.665892	0.533161	AKT1	1
chx04713	Circadian entrainment	1/63	98/8909	0.503065	0.665892	0.533161	GNAI1	1
chx05231	Choline metabolism in cancer	1/63	98/8909	0.503065	0.665892	0.533161	AKT1	1
chx04020	Calcium signaling pathway	2/63	238/8909	0.505093	0.665892	0.533161	SLC25A4/SLC25A5	2
chx04024	cAMP signaling pathway	2/63	238/8909	0.505093	0.665892	0.533161	AKT1/GNAI1	2
chx04916	Melanogenesis	1/63	100/8909	0.510147	0.665892	0.533161	GNAI1	1
chx04660	T cell receptor signaling pathway	1/63	101/8909	0.51365	0.665892	0.533161	AKT1	1
chx05163	Human cytomegalovirus infection	2/63	242/8909	0.514047	0.665892	0.533161	AKT1/GNAI1	2
chx04625	C-type lectin receptor signaling pathway	1/63	102/8909	0.517129	0.665892	0.533161	AKT1	1
chx00564	Glycerophospholipid metabolism	1/63	104/8909	0.524013	0.670166	0.536583	PEMT	1
chx04928	Parathyroid hormone synthesis, secretion and action	1/63	106/8909	0.5308	0.673971	0.53963	GNAI1	1
chx04933	AGE-RAGE signaling pathway in diabetic complications	1/63	107/8909	0.534158	0.673971	0.53963	AKT1	1
chx04976	Bile secretion	1/63	109/8909	0.540803	0.677806	0.5427	ABCG2	1
chx04620	Toll-like receptor signaling pathway	1/63	111/8909	0.547355	0.681475	0.545638	AKT1	1
chx04670	Leukocyte transendothelial migration	1/63	113/8909	0.553814	0.684981	0.548445	GNAI1	1
chx04668	TNF signaling pathway	1/63	119/8909	0.572654	0.69581	0.557115	AKT1	1
chx05146	Amoebiasis	1/63	119/8909	0.572654	0.69581	0.557115	ARG2	1
chx04380	Osteoclast differentiation	1/63	121/8909	0.578758	0.69581	0.557115	AKT1	1
chx04722	Neurotrophin signaling pathway	1/63	121/8909	0.578758	0.69581	0.557115	AKT1	1
chx04919	Thyroid hormone signaling pathway	1/63	122/8909	0.581778	0.69581	0.557115	AKT1	1
chx04726	Serotonergic synapse	1/63	123/8909	0.584776	0.69581	0.557115	GNAI1	1
chx00190	Oxidative phosphorylation	1/63	139/8909	0.629973	0.73599	0.589286	SDHA	1
chx04550	Signaling pathways regulating pluripotency of stem cells	1/63	143/8909	0.640493	0.73599	0.589286	AKT1	1
chx05135	Yersinia infection	1/63	143/8909	0.640493	0.73599	0.589286	AKT1	1
chx04140	Autophagy - animal	1/63	145/8909	0.645642	0.73599	0.589286	AKT1	1
chx05162	Measles	1/63	145/8909	0.645642	0.73599	0.589286	AKT1	1
chx04072	Phospholipase D signaling pathway	1/63	147/8909	0.650719	0.73599	0.589286	AKT1	1
chx04210	Apoptosis	1/63	150/8909	0.6582	0.73599	0.589286	AKT1	1
chx05224	Breast cancer	1/63	150/8909	0.6582	0.73599	0.589286	AKT1	1
chx05022	Pathways of neurodegeneration - multiple diseases	3/63	476/8909	0.661932	0.73599	0.589286	SLC25A4/SLC25A5/SDHA	3
chx04936	Alcoholic liver disease	1/63	152/8909	0.663099	0.73599	0.589286	AKT1	1
chx05226	Gastric cancer	1/63	152/8909	0.663099	0.73599	0.589286	AKT1	1
chx04921	Oxytocin signaling pathway	1/63	153/8909	0.665523	0.73599	0.589286	GNAI1	1
chx04934	Cushing syndrome	1/63	155/8909	0.670319	0.736959	0.590062	GNAI1	1
chx05160	Hepatitis C	1/63	160/8909	0.682015	0.745458	0.596868	AKT1	1
chx05161	Hepatitis B	1/63	166/8909	0.695512	0.755817	0.605161	AKT1	1
chx05225	Hepatocellular carcinoma	1/63	175/8909	0.714708	0.772213	0.618289	AKT1	1
chx04151	PI3K-Akt signaling pathway	2/63	369/8909	0.742014	0.792831	0.634798	AKT1/PCK2	2
chx05152	Tuberculosis	1/63	189/8909	0.742225	0.792831	0.634798	AKT1	1
chx05034	Alcoholism	1/63	203/8909	0.767126	0.813281	0.651171	GNAI1	1
chx04630	JAK-STAT signaling pathway	1/63	207/8909	0.773795	0.813281	0.651171	AKT1	1
chx05167	Kaposi sarcoma-associated herpesvirus infection	1/63	208/8909	0.775433	0.813281	0.651171	AKT1	1
chx05205	Proteoglycans in cancer	1/63	210/8909	0.778673	0.813281	0.651171	AKT1	1
chx05169	Epstein-Barr virus infection	1/63	216/8909	0.788121	0.818601	0.65543	AKT1	1
chx04014	Ras signaling pathway	1/63	238/8909	0.819487	0.846503	0.677771	AKT1	1
chx04144	Endocytosis	1/63	255/8909	0.840551	0.863517	0.691394	TFRC	1
chx05132	Salmonella infection	1/63	261/8909	0.847392	0.865814	0.693233	AKT1	1
chx04010	MAPK signaling pathway	1/63	295/8909	0.881039	0.895326	0.716862	AKT1	1
chx05165	Human papillomavirus infection	1/63	356/8909	0.924097	0.934034	0.747855	AKT1	1
chx05014	Amyotrophic lateral sclerosis	1/63	372/8909	0.932572	0.937559	0.750677	SDHA	1
chx05168	Herpes simplex virus 1 infection	1/63	442/8909	0.959937	0.959937	0.768595	AKT1	1
