# Supplementary material for: Transcriptome Analysis of Goat Mammary Gland Tissue Reveals the Adaptive Strategies and Molecular Mechanisms of Lactation and Involution
Source: Int J Mol Sci. 2022 Nov 20;23(22):14424. doi: 10.3390/ijms232214424 (PMC9693614; doi:10.3390/ijms232214424)
Supplement: Supplementary file 1 [file ijms-23-14424-s001.zip › Table S10.xlsx]

## Sheet: GO
ONTOLOGY	ID	Description	GeneRatio	BgRatio	pvalue	p.adjust	qvalue	geneID	Count
BP	GO:0070661	leukocyte proliferation	33/69	330/18800	6.90221e-40	1.9761e-36	9.29255e-37	CD3E/IL2RA/CD28/TNFAIP3/IL7R/TNFRSF1B/IRF1/CD274/CTLA4/CD40LG/TP53/TLR9/CD40/CD19/KIT/CD74/CD79A/FYN/TNFSF13B/CD86/CSF1/RAC2/IL1B/PTPRC/BTK/PTPN6/INPP5D/CCL5/TYROBP/AIF1/MAPK1/LGALS3/PTK2	33
BP	GO:1903131	mononuclear cell differentiation	35/69	433/18800	3.33484e-39	4.77383e-36	2.24488e-36	TBX21/CD3E/IL2RA/CD3D/STAT6/CD28/IL7R/IRF1/CD83/MYC/IRF7/CTLA4/CD40LG/IRF8/TP53/TLR9/CD19/KIT/CD79B/CD74/LCK/CD79A/TNFSF13B/CD86/CSF1/IL1B/PTPRC/BTK/PTPN6/SPI1/INPP5D/FCER1G/HLA-DRA/CD2/MDK	35
BP	GO:0002696	positive regulation of leukocyte activation	33/69	421/18800	2.59431e-36	2.47584e-33	1.16426e-33	TBX21/CD3E/IL2RA/STAT6/CD28/IL7R/CD83/CD274/TGFB1/CD40LG/TLR9/CD40/CD74/LCK/FYN/TNFSF13B/CD86/IL1B/CCL2/PTPRC/BTK/PTPN6/INPP5D/CCL5/ITGAM/ITGB2/HLA-DRA/TYROBP/TNF/CD2/AIF1/THBS1/MDK	33
BP	GO:0030098	lymphocyte differentiation	32/69	382/18800	4.62741e-36	3.31207e-33	1.55749e-33	TBX21/CD3E/IL2RA/CD3D/STAT6/CD28/IL7R/IRF1/CD83/CTLA4/CD40LG/IRF8/TP53/TLR9/CD19/KIT/CD79B/CD74/LCK/CD79A/TNFSF13B/CD86/IL1B/PTPRC/BTK/PTPN6/SPI1/INPP5D/FCER1G/HLA-DRA/CD2/MDK	32
BP	GO:0050867	positive regulation of cell activation	33/69	436/18800	8.37773e-36	4.79709e-33	2.25581e-33	TBX21/CD3E/IL2RA/STAT6/CD28/IL7R/CD83/CD274/TGFB1/CD40LG/TLR9/CD40/CD74/LCK/FYN/TNFSF13B/CD86/IL1B/CCL2/PTPRC/BTK/PTPN6/INPP5D/CCL5/ITGAM/ITGB2/HLA-DRA/TYROBP/TNF/CD2/AIF1/THBS1/MDK	33
BP	GO:0032943	mononuclear cell proliferation	29/69	300/18800	2.62321e-34	1.25171e-31	5.88612e-32	CD3E/IL2RA/CD28/IL7R/TNFRSF1B/IRF1/CD274/CTLA4/CD40LG/TP53/TLR9/CD40/CD19/CD74/CD79A/FYN/TNFSF13B/CD86/CSF1/RAC2/IL1B/PTPRC/BTK/PTPN6/INPP5D/CCL5/TYROBP/AIF1/LGALS3	29
BP	GO:0070663	regulation of leukocyte proliferation	27/69	254/18800	5.60706e-33	2.29329e-30	1.07841e-30	CD3E/IL2RA/CD28/TNFAIP3/TNFRSF1B/IRF1/CD274/CTLA4/CD40LG/TLR9/CD40/CD74/TNFSF13B/CD86/CSF1/RAC2/IL1B/PTPRC/BTK/PTPN6/INPP5D/CCL5/TYROBP/AIF1/MAPK1/LGALS3/PTK2	27
BP	GO:0007159	leukocyte cell-cell adhesion	30/69	381/18800	7.84246e-33	2.72804e-30	1.28285e-30	TBX21/CD3E/IL2RA/CD28/CD44/IL7R/IRF1/CD83/CD274/CXCL12/CTLA4/CD40LG/CD74/LCK/FYN/TNFSF13B/CD86/RAC2/IL1B/CCL2/PTPRC/PTPN6/CCL5/ICAM1/ITGB2/HLA-DRA/TNF/AIF1/LGALS3/MDK	30
BP	GO:0046651	lymphocyte proliferation	28/69	296/18800	8.57575e-33	2.72804e-30	1.28285e-30	CD3E/IL2RA/CD28/IL7R/TNFRSF1B/IRF1/CD274/CTLA4/CD40LG/TP53/TLR9/CD40/CD19/CD74/CD79A/FYN/TNFSF13B/CD86/RAC2/IL1B/PTPRC/BTK/PTPN6/INPP5D/CCL5/TYROBP/AIF1/LGALS3	28
BP	GO:0022407	regulation of cell-cell adhesion	31/69	456/18800	5.25048e-32	1.50321e-29	7.0688e-30	TBX21/CD3E/IL2RA/CD28/CD44/IL7R/IRF1/CD83/CD274/TGFB1/CXCL12/CTLA4/CD40LG/CD74/LCK/FYN/TNFSF13B/CD86/IL1B/CCL2/PTPRC/PTPN6/SPI1/CCL5/ITGB2/HLA-DRA/TNF/AIF1/LGALS3/PTK2/MDK	31
BP	GO:0050900	leukocyte migration	29/69	384/18800	3.87115e-31	1.00755e-28	4.73799e-29	TBX21/CXCL8/CXCL12/KIT/CD74/LCK/FYN/CSF1/RAC2/IL1B/CCL2/HCK/SPI1/CCL5/ICAM1/CXCL10/FCER1G/ITGB2/TNF/AIF1/MAPK1/C3AR1/RARRES2/LGALS3/THBS1/EMILIN1/PTK2/MDK/P2RX4	29
BP	GO:1903037	regulation of leukocyte cell-cell adhesion	28/69	344/18800	6.28425e-31	1.49932e-28	7.05049e-29	TBX21/CD3E/IL2RA/CD28/CD44/IL7R/IRF1/CD83/CD274/CXCL12/CTLA4/CD40LG/CD74/LCK/FYN/TNFSF13B/CD86/IL1B/CCL2/PTPRC/PTPN6/CCL5/ITGB2/HLA-DRA/TNF/AIF1/LGALS3/MDK	28
BP	GO:0051251	positive regulation of lymphocyte activation	28/69	371/18800	5.35244e-30	1.17877e-27	5.54313e-28	TBX21/CD3E/IL2RA/STAT6/CD28/IL7R/CD83/CD274/TGFB1/CD40LG/TLR9/CD40/CD74/LCK/FYN/TNFSF13B/CD86/IL1B/CCL2/PTPRC/BTK/PTPN6/INPP5D/CCL5/HLA-DRA/TYROBP/AIF1/MDK	28
BP	GO:0050863	regulation of T cell activation	27/69	342/18800	2.07858e-29	4.2507e-27	1.99888e-27	TBX21/CD3E/IL2RA/CD28/IL7R/TNFRSF1B/IRF1/CD83/CD274/CTLA4/CD40LG/CD74/LCK/FYN/TNFSF13B/CD86/RAC2/IL1B/CCL2/PTPRC/PTPN6/CCL5/HLA-DRA/CD2/AIF1/LGALS3/MDK	27
BP	GO:0032944	regulation of mononuclear cell proliferation	24/69	233/18800	7.29685e-29	1.39273e-26	6.54925e-27	CD3E/IL2RA/CD28/TNFRSF1B/IRF1/CD274/CTLA4/CD40LG/TLR9/CD40/CD74/TNFSF13B/CD86/CSF1/RAC2/IL1B/PTPRC/BTK/PTPN6/INPP5D/CCL5/TYROBP/AIF1/LGALS3	24
BP	GO:0002683	negative regulation of immune system process	28/69	425/18800	2.452e-28	4.37895e-26	2.05918e-26	TBX21/IL2RA/STAT6/TNFAIP3/IL7R/IRF1/CD274/MYC/TGFB1/CXCL12/CTLA4/CD74/FYN/CD86/CCL2/CD68/PTPRC/HCK/BTK/PTPN6/SPI1/INPP5D/TYROBP/TNF/LGALS3/THBS1/EMILIN1/MDK	28
BP	GO:0002366	leukocyte activation involved in immune response	25/69	285/18800	2.60014e-28	4.37895e-26	2.05918e-26	TBX21/STAT6/CD28/TGFB1/CD40LG/IRF8/TP53/CD40/CD19/KIT/CD74/CD86/RAC2/PTPRC/BTK/PTPN6/SPI1/ICAM1/FCER1G/ITGAM/ITGB2/HLA-DRA/TYROBP/LGALS3/MDK	25
BP	GO:0002263	cell activation involved in immune response	25/69	289/18800	3.70736e-28	5.89677e-26	2.77294e-26	TBX21/STAT6/CD28/TGFB1/CD40LG/IRF8/TP53/CD40/CD19/KIT/CD74/CD86/RAC2/PTPRC/BTK/PTPN6/SPI1/ICAM1/FCER1G/ITGAM/ITGB2/HLA-DRA/TYROBP/LGALS3/MDK	25
BP	GO:0032103	positive regulation of response to external stimulus	28/69	442/18800	7.34633e-28	1.10698e-25	5.20551e-26	CD28/CXCL8/TGFB1/IRF7/CXCL12/TLR9/CD74/FYN/CSF1/RAC2/IL1B/HCK/BTK/SPI1/CCL5/CXCL10/TYROBP/NFKBIA/TNF/AIF1/MAPK1/C3AR1/RARRES2/THBS1/EMILIN1/PTK2/MDK/P2RX4	28
BP	GO:0097529	myeloid leukocyte migration	23/69	229/18800	2.2337e-27	3.19754e-25	1.50363e-25	CXCL8/CXCL12/KIT/CD74/CSF1/RAC2/IL1B/CCL2/SPI1/CCL5/CXCL10/FCER1G/ITGB2/AIF1/MAPK1/C3AR1/RARRES2/LGALS3/THBS1/EMILIN1/PTK2/MDK/P2RX4	23
BP	GO:0050670	regulation of lymphocyte proliferation	23/69	230/18800	2.47601e-27	3.37562e-25	1.58737e-25	CD3E/IL2RA/CD28/TNFRSF1B/IRF1/CD274/CTLA4/CD40LG/TLR9/CD40/CD74/TNFSF13B/CD86/RAC2/IL1B/PTPRC/BTK/PTPN6/INPP5D/CCL5/TYROBP/AIF1/LGALS3	23
BP	GO:0002764	immune response-regulating signaling pathway	28/69	482/18800	8.20735e-27	1.06807e-24	5.02258e-25	CD28/TNFAIP3/IRF1/CD14/IRF7/CTLA4/TLR9/CD40/CD19/KIT/CD79B/LCK/CD79A/FYN/CTSS/PTPRC/HCK/BTK/PTPN6/INPP5D/FCER1G/TYROBP/NFKBIA/TNF/MAPK1/C3AR1/LGALS3/PTK2	28
BP	GO:1903039	positive regulation of leukocyte cell-cell adhesion	23/69	245/18800	1.098e-26	1.36678e-24	6.42722e-25	CD3E/IL2RA/CD28/CD44/IL7R/CD83/CD274/CD40LG/CD74/LCK/FYN/TNFSF13B/CD86/IL1B/CCL2/PTPRC/PTPN6/CCL5/ITGB2/HLA-DRA/TNF/AIF1/MDK	23
BP	GO:0042113	B cell activation	25/69	336/18800	1.6788e-26	2.00266e-24	9.41745e-25	TBX21/STAT6/CD28/TNFAIP3/IL7R/TGFB1/CTLA4/CD40LG/IRF8/TP53/TLR9/CD40/CD19/KIT/CD79B/CD74/CD79A/TNFSF13B/CD86/PTPRC/BTK/PTPN6/SPI1/INPP5D/TYROBP	25
BP	GO:0002697	regulation of immune effector process	25/69	353/18800	5.80203e-26	6.64448e-24	3.12454e-24	TBX21/STAT6/CD28/IL7R/TNFRSF1B/TGFB1/CD40LG/TLR9/CD40/KIT/CD74/CD86/RAC2/IL1B/PTPRC/BTK/PTPN6/SPI1/ICAM1/ITGAM/ITGB2/HLA-DRA/TYROBP/TNF/LGALS3	25
BP	GO:1903706	regulation of hemopoiesis	25/69	371/18800	2.01556e-25	2.21944e-23	1.04368e-23	TBX21/IL2RA/CD28/IL7R/IRF1/CD83/MYC/TGFB1/IRF7/CTLA4/TLR9/CD74/CD86/CSF1/PTPRC/BTK/PTPN6/SPI1/INPP5D/HLA-DRA/TYROBP/NFKBIA/TNF/CD2/MDK	25
BP	GO:1902105	regulation of leukocyte differentiation	23/69	283/18800	3.20284e-25	3.39619e-23	1.59705e-23	TBX21/IL2RA/CD28/IL7R/IRF1/CD83/MYC/TGFB1/IRF7/CTLA4/TLR9/CD74/CD86/CSF1/PTPRC/BTK/PTPN6/INPP5D/HLA-DRA/TYROBP/TNF/CD2/MDK	23
BP	GO:0002687	positive regulation of leukocyte migration	19/69	141/18800	4.06766e-25	4.15918e-23	1.95584e-23	CXCL8/CXCL12/CD74/CSF1/RAC2/SPI1/CCL5/ICAM1/CXCL10/TNF/AIF1/MAPK1/C3AR1/RARRES2/LGALS3/THBS1/PTK2/MDK/P2RX4	19
BP	GO:0022409	positive regulation of cell-cell adhesion	23/69	291/18800	6.12327e-25	6.04514e-23	2.84271e-23	CD3E/IL2RA/CD28/CD44/IL7R/CD83/CD274/CD40LG/CD74/LCK/FYN/TNFSF13B/CD86/IL1B/CCL2/PTPRC/PTPN6/CCL5/ITGB2/HLA-DRA/TNF/AIF1/MDK	23
BP	GO:0045785	positive regulation of cell adhesion	26/69	446/18800	7.57003e-25	7.22433e-23	3.39721e-23	CD3E/IL2RA/CD28/CD44/IL7R/CD83/CD274/CXCL12/CD40LG/CD74/LCK/FYN/TNFSF13B/CD86/CSF1/IL1B/CCL2/PTPRC/PTPN6/CCL5/ITGB2/HLA-DRA/TNF/AIF1/EMILIN1/MDK	26
BP	GO:0002685	regulation of leukocyte migration	21/69	218/18800	1.39351e-24	1.26774e-22	5.96152e-23	CXCL8/CXCL12/CD74/CSF1/RAC2/CCL2/SPI1/CCL5/ICAM1/CXCL10/TNF/AIF1/MAPK1/C3AR1/RARRES2/LGALS3/THBS1/EMILIN1/PTK2/MDK/P2RX4	21
BP	GO:0002443	leukocyte mediated immunity	26/69	457/18800	1.41697e-24	1.26774e-22	5.96152e-23	TBX21/STAT6/CD28/IL7R/TNFRSF1B/TGFB1/IRF7/CD40LG/CD40/CD19/KIT/CD74/RAC2/IL1B/PTPRC/BTK/PTPN6/SPI1/INPP5D/ICAM1/FCER1G/ITGAM/ITGB2/HLA-DRA/TYROBP/TNF	26
BP	GO:0030217	T cell differentiation	22/69	263/18800	2.17863e-24	1.89013e-22	8.88825e-23	TBX21/CD3E/IL2RA/CD3D/STAT6/CD28/IL7R/IRF1/CD83/CTLA4/TP53/KIT/CD74/LCK/CD86/IL1B/PTPRC/SPI1/FCER1G/HLA-DRA/CD2/MDK	22
BP	GO:0001819	positive regulation of cytokine production	26/69	475/18800	3.82022e-24	3.21685e-22	1.51271e-22	TBX21/CD3E/CD28/IRF1/CD83/CD274/TGFB1/CD14/IRF7/CD40LG/IRF8/TLR9/CD40/KIT/CD74/CD86/IL1B/PTPRC/FCER1G/TYROBP/TNF/CD2/AIF1/C3AR1/THBS1/MDK	26
BP	GO:0019221	cytokine-mediated signaling pathway	26/69	486/18800	6.86731e-24	5.61746e-22	2.64159e-22	IL2RA/STAT6/CD44/TNFAIP3/IL7R/TNFRSF1B/CXCL8/IRF1/IRF7/CXCL12/TP53/KIT/CD74/TNFSF13B/CSF1/IL1B/CCL2/PTPRC/HCK/PTPN6/SPI1/CCL5/CXCL10/FCER1G/NFKBIA/TNF	26
BP	GO:0030595	leukocyte chemotaxis	21/69	236/18800	7.62732e-24	6.06584e-22	2.85244e-22	CXCL8/CXCL12/KIT/CD74/CSF1/RAC2/IL1B/CCL2/SPI1/CCL5/CXCL10/FCER1G/ITGB2/AIF1/MAPK1/C3AR1/RARRES2/LGALS3/THBS1/PTK2/MDK	21
BP	GO:0071216	cellular response to biotic stimulus	21/69	256/18800	4.31325e-23	3.33752e-21	1.56946e-21	TNFAIP3/TNFRSF1B/CXCL8/CD274/TGFB1/CD14/IRF8/TP53/CD86/IL1B/MRC1/CCL2/CD68/HCK/BTK/SPI1/CCL5/CXCL10/NFKBIA/TNF/MAPK1	21
BP	GO:0050870	positive regulation of T cell activation	20/69	223/18800	8.88682e-23	6.69552e-21	3.14854e-21	CD3E/IL2RA/CD28/IL7R/CD83/CD274/CD40LG/CD74/LCK/FYN/TNFSF13B/CD86/IL1B/CCL2/PTPRC/PTPN6/CCL5/HLA-DRA/AIF1/MDK	20
BP	GO:0060326	cell chemotaxis	22/69	315/18800	1.18437e-22	8.69449e-21	4.08856e-21	CXCL8/CXCL12/KIT/CD74/CSF1/RAC2/IL1B/CCL2/SPI1/CCL5/CXCL10/FCER1G/ITGB2/AIF1/MAPK1/C3AR1/RARRES2/LGALS3/THBS1/PTK2/MDK/P2RX4	22
BP	GO:0002460	adaptive immune response based on somatic recombination of immune receptors built from immunoglobulin superfamily domains	23/69	370/18800	1.54453e-22	1.1055e-20	5.19858e-21	TBX21/STAT6/CD28/TNFAIP3/IL7R/TNFRSF1B/CD274/TGFB1/IRF7/CD40LG/CD40/CD19/CD74/TNFSF13B/IL1B/PTPRC/BTK/PTPN6/INPP5D/ICAM1/FCER1G/HLA-DRA/TNF	23
BP	GO:0071621	granulocyte chemotaxis	17/69	128/18800	2.14519e-22	1.49797e-20	7.04415e-21	CXCL8/CD74/CSF1/RAC2/IL1B/CCL2/CCL5/CXCL10/FCER1G/ITGB2/MAPK1/C3AR1/RARRES2/LGALS3/THBS1/PTK2/MDK	17
BP	GO:0002703	regulation of leukocyte mediated immunity	20/69	236/18800	2.80754e-22	1.91381e-20	8.99962e-21	TBX21/STAT6/CD28/IL7R/TNFRSF1B/TGFB1/CD40/KIT/RAC2/IL1B/PTPRC/BTK/PTPN6/SPI1/ICAM1/ITGAM/ITGB2/HLA-DRA/TYROBP/TNF	20
BP	GO:0042098	T cell proliferation	19/69	204/18800	5.7969e-22	3.85966e-20	1.81499e-20	CD3E/IL2RA/CD28/TNFRSF1B/IRF1/CD274/CTLA4/CD40LG/TP53/FYN/TNFSF13B/CD86/RAC2/IL1B/PTPRC/PTPN6/CCL5/AIF1/LGALS3	19
BP	GO:0002699	positive regulation of immune effector process	20/69	248/18800	7.65437e-22	4.98056e-20	2.34209e-20	TBX21/STAT6/CD28/TGFB1/TLR9/CD40/KIT/CD74/CD86/RAC2/IL1B/PTPRC/BTK/PTPN6/SPI1/ITGAM/ITGB2/HLA-DRA/TYROBP/TNF	20
BP	GO:0050921	positive regulation of chemotaxis	17/69	140/18800	1.05317e-21	6.70053e-20	3.1509e-20	CXCL8/TGFB1/CXCL12/CD74/CSF1/RAC2/SPI1/CCL5/CXCL10/AIF1/MAPK1/C3AR1/RARRES2/THBS1/PTK2/MDK/P2RX4	17
BP	GO:0071222	cellular response to lipopolysaccharide	19/69	217/18800	1.91301e-21	1.19064e-19	5.59895e-20	TNFAIP3/TNFRSF1B/CXCL8/CD274/TGFB1/CD14/IRF8/CD86/IL1B/MRC1/CCL2/CD68/HCK/SPI1/CCL5/CXCL10/NFKBIA/TNF/MAPK1	19
BP	GO:0002690	positive regulation of leukocyte chemotaxis	15/69	94/18800	4.32072e-21	2.63196e-19	1.23767e-19	CXCL8/CXCL12/CD74/CSF1/RAC2/SPI1/CCL5/CXCL10/AIF1/MAPK1/C3AR1/RARRES2/THBS1/PTK2/MDK	15
BP	GO:0002819	regulation of adaptive immune response	18/69	188/18800	4.83102e-21	2.8815e-19	1.35502e-19	TBX21/STAT6/CD28/TNFAIP3/IL7R/TNFRSF1B/IRF1/CD274/TGFB1/IRF7/CD40/TNFSF13B/IL1B/PTPRC/BTK/PTPN6/HLA-DRA/TNF	18
BP	GO:0071219	cellular response to molecule of bacterial origin	19/69	229/18800	5.38929e-21	3.14889e-19	1.48075e-19	TNFAIP3/TNFRSF1B/CXCL8/CD274/TGFB1/CD14/IRF8/CD86/IL1B/MRC1/CCL2/CD68/HCK/SPI1/CCL5/CXCL10/NFKBIA/TNF/MAPK1	19
BP	GO:0097530	granulocyte migration	17/69	154/18800	5.64503e-21	3.23235e-19	1.52e-19	CXCL8/CD74/CSF1/RAC2/IL1B/CCL2/CCL5/CXCL10/FCER1G/ITGB2/MAPK1/C3AR1/RARRES2/LGALS3/THBS1/PTK2/MDK	17
BP	GO:0002688	regulation of leukocyte chemotaxis	16/69	124/18800	6.74189e-21	3.78471e-19	1.77975e-19	CXCL8/CXCL12/CD74/CSF1/RAC2/CCL2/SPI1/CCL5/CXCL10/AIF1/MAPK1/C3AR1/RARRES2/THBS1/PTK2/MDK	16
BP	GO:0070665	positive regulation of leukocyte proliferation	17/69	158/18800	8.84838e-21	4.87171e-19	2.29091e-19	CD3E/IL2RA/CD28/CD274/CD40LG/TLR9/CD40/CD74/TNFSF13B/CD86/CSF1/IL1B/PTPRC/CCL5/AIF1/MAPK1/PTK2	17
BP	GO:0002285	lymphocyte activation involved in immune response	18/69	201/18800	1.64591e-20	8.89099e-19	4.18096e-19	TBX21/STAT6/CD28/TGFB1/CD40LG/IRF8/TP53/CD40/CD19/CD74/CD86/PTPRC/SPI1/ICAM1/FCER1G/HLA-DRA/LGALS3/MDK	18
BP	GO:0042129	regulation of T cell proliferation	17/69	174/18800	4.75956e-20	2.52345e-18	1.18664e-18	CD3E/IL2RA/CD28/TNFRSF1B/IRF1/CD274/CTLA4/CD40LG/TNFSF13B/CD86/RAC2/IL1B/PTPRC/PTPN6/CCL5/AIF1/LGALS3	17
BP	GO:0045619	regulation of lymphocyte differentiation	17/69	181/18800	9.43529e-20	4.9115e-18	2.30961e-18	TBX21/IL2RA/CD28/IL7R/IRF1/CD83/CTLA4/TLR9/CD74/CD86/PTPRC/BTK/PTPN6/INPP5D/HLA-DRA/CD2/MDK	17
BP	GO:0071675	regulation of mononuclear cell migration	15/69	116/18800	1.20563e-19	6.16381e-18	2.89851e-18	CXCL12/CSF1/CCL2/SPI1/CCL5/CXCL10/TNF/AIF1/MAPK1/C3AR1/RARRES2/LGALS3/THBS1/PTK2/MDK	15
BP	GO:0050920	regulation of chemotaxis	18/69	225/18800	1.28355e-19	6.44704e-18	3.0317e-18	CXCL8/TGFB1/CXCL12/CD74/CSF1/RAC2/CCL2/SPI1/CCL5/CXCL10/AIF1/MAPK1/C3AR1/RARRES2/THBS1/PTK2/MDK/P2RX4	18
BP	GO:0002768	immune response-regulating cell surface receptor signaling pathway	20/69	328/18800	2.04151e-19	1.00773e-17	4.73882e-18	CD28/CTLA4/CD40/CD19/KIT/CD79B/LCK/CD79A/FYN/PTPRC/HCK/BTK/PTPN6/INPP5D/FCER1G/TYROBP/MAPK1/C3AR1/LGALS3/PTK2	20
BP	GO:0002274	myeloid leukocyte activation	18/69	232/18800	2.23565e-19	1.08486e-17	5.10151e-18	CXCL8/KIT/CD74/CSF1/RAC2/PTPRC/BTK/PTPN6/SPI1/CCL5/FCER1G/ITGAM/ITGB2/TYROBP/TNF/CD2/AIF1/THBS1	18
BP	GO:0071674	mononuclear cell migration	17/69	199/18800	4.8468e-19	2.31273e-17	1.08755e-17	TBX21/CXCL12/CSF1/CCL2/SPI1/CCL5/ICAM1/CXCL10/TNF/AIF1/MAPK1/C3AR1/RARRES2/LGALS3/THBS1/PTK2/MDK	17
BP	GO:1905517	macrophage migration	12/69	55/18800	8.45248e-19	3.96712e-17	1.86552e-17	CSF1/CCL2/CCL5/MAPK1/C3AR1/RARRES2/LGALS3/THBS1/EMILIN1/PTK2/MDK/P2RX4	12
BP	GO:0002237	response to molecule of bacterial origin	20/69	354/18800	9.18862e-19	4.24307e-17	1.99529e-17	TNFAIP3/TNFRSF1B/CXCL8/CD274/TGFB1/CD14/IRF8/TLR9/CD86/IL1B/MRC1/CCL2/CD68/HCK/SPI1/CCL5/CXCL10/NFKBIA/TNF/MAPK1	20
BP	GO:0002822	regulation of adaptive immune response based on somatic recombination of immune receptors built from immunoglobulin superfamily domains	16/69	173/18800	1.63754e-18	7.44169e-17	3.49943e-17	TBX21/STAT6/CD28/TNFAIP3/IL7R/TNFRSF1B/CD274/TGFB1/CD40/TNFSF13B/IL1B/PTPRC/BTK/PTPN6/HLA-DRA/TNF	16
BP	GO:0002449	lymphocyte mediated immunity	20/69	365/18800	1.67595e-18	7.49728e-17	3.52557e-17	TBX21/STAT6/CD28/IL7R/TNFRSF1B/TGFB1/IRF7/CD40LG/CD40/CD19/CD74/IL1B/PTPRC/BTK/PTPN6/INPP5D/ICAM1/FCER1G/HLA-DRA/TNF	20
BP	GO:0002705	positive regulation of leukocyte mediated immunity	15/69	138/18800	1.79708e-18	7.91547e-17	3.72222e-17	TBX21/STAT6/CD28/TGFB1/CD40/KIT/IL1B/PTPRC/BTK/SPI1/ITGAM/ITGB2/HLA-DRA/TYROBP/TNF	15
BP	GO:0050866	negative regulation of cell activation	17/69	216/18800	1.97633e-18	8.5731e-17	4.03147e-17	TBX21/IL2RA/TNFAIP3/IRF1/CD274/CTLA4/CD74/CD86/PTPRC/BTK/PTPN6/SPI1/INPP5D/TYROBP/LGALS3/EMILIN1/MDK	17
BP	GO:0032946	positive regulation of mononuclear cell proliferation	15/69	143/18800	3.11136e-18	1.32953e-16	6.25205e-17	CD3E/IL2RA/CD28/CD274/CD40LG/TLR9/CD40/CD74/TNFSF13B/CD86/CSF1/IL1B/PTPRC/CCL5/AIF1	15
BP	GO:0032496	response to lipopolysaccharide	19/69	333/18800	6.47921e-18	2.72794e-16	1.2828e-16	TNFAIP3/TNFRSF1B/CXCL8/CD274/TGFB1/CD14/IRF8/CD86/IL1B/MRC1/CCL2/CD68/HCK/SPI1/CCL5/CXCL10/NFKBIA/TNF/MAPK1	19
BP	GO:0002695	negative regulation of leukocyte activation	16/69	193/18800	9.6432e-18	4.00123e-16	1.88156e-16	TBX21/IL2RA/TNFAIP3/IRF1/CD274/CTLA4/CD74/CD86/PTPRC/BTK/PTPN6/SPI1/INPP5D/TYROBP/LGALS3/MDK	16
BP	GO:0050864	regulation of B cell activation	16/69	200/18800	1.71246e-17	7.00396e-16	3.29359e-16	TBX21/STAT6/CD28/TNFAIP3/TGFB1/CTLA4/TLR9/CD40/CD19/CD74/TNFSF13B/PTPRC/BTK/PTPN6/INPP5D/TYROBP	16
BP	GO:0002429	immune response-activating cell surface receptor signaling pathway	18/69	300/18800	2.23811e-17	8.89961e-16	4.18501e-16	CD28/CTLA4/CD19/CD79B/LCK/CD79A/FYN/PTPRC/HCK/BTK/PTPN6/INPP5D/FCER1G/TYROBP/MAPK1/C3AR1/LGALS3/PTK2	18
BP	GO:0002757	immune response-activating signal transduction	18/69	300/18800	2.23811e-17	8.89961e-16	4.18501e-16	CD28/CTLA4/CD19/CD79B/LCK/CD79A/FYN/PTPRC/HCK/BTK/PTPN6/INPP5D/FCER1G/TYROBP/MAPK1/C3AR1/LGALS3/PTK2	18
BP	GO:0071622	regulation of granulocyte chemotaxis	11/69	51/18800	2.99406e-17	1.17424e-15	5.52184e-16	CXCL8/CD74/CSF1/RAC2/CCL5/MAPK1/C3AR1/RARRES2/THBS1/PTK2/MDK	11
BP	GO:0002700	regulation of production of molecular mediator of immune response	15/69	167/18800	3.34424e-17	1.29386e-15	6.08432e-16	TBX21/STAT6/CD28/TNFRSF1B/TGFB1/CD40LG/TLR9/CD40/KIT/CD74/CD86/IL1B/PTPRC/BTK/TNF	15
BP	GO:0042100	B cell proliferation	13/69	100/18800	3.68304e-17	1.40594e-15	6.61138e-16	IL7R/CTLA4/CD40LG/TLR9/CD40/CD19/CD74/CD79A/TNFSF13B/PTPRC/BTK/INPP5D/TYROBP	13
BP	GO:0016064	immunoglobulin mediated immune response	16/69	216/18800	5.88975e-17	2.21873e-15	1.04335e-15	TBX21/STAT6/CD28/TGFB1/IRF7/CD40LG/CD40/CD19/CD74/PTPRC/BTK/PTPN6/INPP5D/FCER1G/HLA-DRA/TNF	16
BP	GO:0019724	B cell mediated immunity	16/69	219/18800	7.3438e-17	2.73056e-15	1.28404e-15	TBX21/STAT6/CD28/TGFB1/IRF7/CD40LG/CD40/CD19/CD74/PTPRC/BTK/PTPN6/INPP5D/FCER1G/HLA-DRA/TNF	16
BP	GO:0048246	macrophage chemotaxis	10/69	38/18800	9.78562e-17	3.59182e-15	1.68904e-15	CSF1/CCL2/CCL5/MAPK1/C3AR1/RARRES2/LGALS3/THBS1/PTK2/MDK	10
BP	GO:0050671	positive regulation of lymphocyte proliferation	14/69	141/18800	1.00279e-16	3.60178e-15	1.69372e-15	CD3E/IL2RA/CD28/CD274/CD40LG/TLR9/CD40/CD74/TNFSF13B/CD86/IL1B/PTPRC/CCL5/AIF1	14
BP	GO:0002253	activation of immune response	19/69	386/18800	1.00644e-16	3.60178e-15	1.69372e-15	CD28/CTLA4/CD19/CD79B/LCK/CD79A/FYN/IL1B/PTPRC/HCK/BTK/PTPN6/INPP5D/FCER1G/TYROBP/MAPK1/C3AR1/LGALS3/PTK2	19
BP	GO:0030183	B cell differentiation	14/69	142/18800	1.10942e-16	3.92132e-15	1.84399e-15	CD40LG/IRF8/TP53/TLR9/CD19/KIT/CD79B/CD79A/TNFSF13B/PTPRC/BTK/PTPN6/SPI1/INPP5D	14
BP	GO:1905523	positive regulation of macrophage migration	9/69	25/18800	1.37027e-16	4.78425e-15	2.24978e-15	CSF1/CCL5/MAPK1/C3AR1/RARRES2/THBS1/PTK2/MDK/P2RX4	9
BP	GO:1905521	regulation of macrophage migration	10/69	41/18800	2.30085e-16	7.93655e-15	3.73214e-15	CSF1/CCL5/MAPK1/C3AR1/RARRES2/THBS1/EMILIN1/PTK2/MDK/P2RX4	10
BP	GO:0031663	lipopolysaccharide-mediated signaling pathway	11/69	62/18800	3.09711e-16	1.0556e-14	4.96391e-15	TNFAIP3/TGFB1/CD14/IL1B/CCL2/HCK/SPI1/CCL5/NFKBIA/TNF/MAPK1	11
BP	GO:1902107	positive regulation of leukocyte differentiation	14/69	157/18800	4.63502e-16	1.54303e-14	7.25605e-15	IL2RA/IL7R/CD83/TGFB1/CD74/CD86/CSF1/PTPRC/BTK/INPP5D/HLA-DRA/TYROBP/TNF/MDK	14
BP	GO:1903708	positive regulation of hemopoiesis	14/69	157/18800	4.63502e-16	1.54303e-14	7.25605e-15	IL2RA/IL7R/CD83/TGFB1/CD74/CD86/CSF1/PTPRC/BTK/INPP5D/HLA-DRA/TYROBP/TNF/MDK	14
BP	GO:0051250	negative regulation of lymphocyte activation	14/69	161/18800	6.62021e-16	2.17858e-14	1.02447e-14	TBX21/IL2RA/TNFAIP3/IRF1/CD274/CTLA4/CD74/CD86/BTK/PTPN6/INPP5D/TYROBP/LGALS3/MDK	14
BP	GO:0010759	positive regulation of macrophage chemotaxis	8/69	18/18800	9.19801e-16	2.99249e-14	1.40721e-14	CSF1/CCL5/MAPK1/C3AR1/RARRES2/THBS1/PTK2/MDK	8
BP	GO:0030593	neutrophil chemotaxis	12/69	106/18800	3.67378e-15	1.1818e-13	5.55737e-14	CXCL8/CD74/RAC2/IL1B/CCL2/CCL5/CXCL10/FCER1G/ITGB2/C3AR1/LGALS3/MDK	12
BP	GO:0002824	positive regulation of adaptive immune response based on somatic recombination of immune receptors built from immunoglobulin superfamily domains	12/69	110/18800	5.80577e-15	1.84688e-13	8.68489e-14	TBX21/STAT6/CD28/CD274/TGFB1/CD40/TNFSF13B/IL1B/PTPRC/BTK/HLA-DRA/TNF	12
BP	GO:0045580	regulation of T cell differentiation	13/69	151/18800	9.00106e-15	2.83187e-13	1.33168e-13	TBX21/IL2RA/CD28/IL7R/IRF1/CD83/CTLA4/CD74/CD86/PTPRC/HLA-DRA/CD2/MDK	13
BP	GO:0002821	positive regulation of adaptive immune response	12/69	115/18800	1.00364e-14	3.12329e-13	1.46872e-13	TBX21/STAT6/CD28/CD274/TGFB1/CD40/TNFSF13B/IL1B/PTPRC/BTK/HLA-DRA/TNF	12
BP	GO:0022408	negative regulation of cell-cell adhesion	14/69	199/18800	1.29779e-14	3.99523e-13	1.87874e-13	TBX21/IL2RA/IRF1/CD274/TGFB1/CXCL12/CTLA4/CD74/CD86/PTPN6/SPI1/LGALS3/PTK2/MDK	14
BP	GO:0007162	negative regulation of cell adhesion	16/69	305/18800	1.37166e-14	4.17772e-13	1.96456e-13	TBX21/IL2RA/IRF1/CD274/TGFB1/CXCL12/CTLA4/CD74/CD86/PTPRC/PTPN6/SPI1/LGALS3/THBS1/PTK2/MDK	16
BP	GO:0006909	phagocytosis	16/69	310/18800	1.76703e-14	5.32528e-13	2.5042e-13	CD14/IRF8/FYN/RAC2/IL1B/CCL2/PTPRC/HCK/FCER1G/ITGAM/ITGB2/TYROBP/TNF/AIF1/THBS1/PTK2	16
BP	GO:0018108	peptidyl-tyrosine phosphorylation	17/69	373/18800	1.85582e-14	5.53458e-13	2.60262e-13	CD3E/CD44/TGFB1/TP53/CD40/KIT/CD74/LCK/FYN/PTPRC/HCK/BTK/PTPN6/CCL5/ITGB2/TNF/PTK2	17
BP	GO:0002440	production of molecular mediator of immune response	16/69	312/18800	1.95303e-14	5.76445e-13	2.71071e-13	TBX21/STAT6/CD28/TNFRSF1B/TGFB1/CD40LG/TLR9/CD40/KIT/CD74/CD86/IL1B/PTPRC/BTK/HLA-DRA/TNF	16
BP	GO:0018212	peptidyl-tyrosine modification	17/69	376/18800	2.11601e-14	6.18176e-13	2.90695e-13	CD3E/CD44/TGFB1/TP53/CD40/KIT/CD74/LCK/FYN/PTPRC/HCK/BTK/PTPN6/CCL5/ITGB2/TNF/PTK2	17
BP	GO:1990266	neutrophil migration	12/69	128/18800	3.72284e-14	1.07662e-12	5.06275e-13	CXCL8/CD74/RAC2/IL1B/CCL2/CCL5/CXCL10/FCER1G/ITGB2/C3AR1/LGALS3/MDK	12
BP	GO:0010758	regulation of macrophage chemotaxis	8/69	27/18800	4.54682e-14	1.30176e-12	6.12146e-13	CSF1/CCL5/MAPK1/C3AR1/RARRES2/THBS1/PTK2/MDK	8
BP	GO:0031295	T cell costimulation	9/69	45/18800	5.6111e-14	1.59055e-12	7.47951e-13	CD3E/CD28/CD274/CD40LG/LCK/FYN/TNFSF13B/CD86/PTPN6	9
BP	GO:0002706	regulation of lymphocyte mediated immunity	13/69	175/18800	6.17293e-14	1.73266e-12	8.14776e-13	TBX21/STAT6/CD28/IL7R/TNFRSF1B/TGFB1/CD40/IL1B/PTPRC/BTK/PTPN6/HLA-DRA/TNF	13
BP	GO:0031294	lymphocyte costimulation	9/69	47/18800	8.57861e-14	2.38452e-12	1.12131e-12	CD3E/CD28/CD274/CD40LG/LCK/FYN/TNFSF13B/CD86/PTPN6	9
BP	GO:0042102	positive regulation of T cell proliferation	11/69	103/18800	1.08179e-13	2.97803e-12	1.40041e-12	CD3E/IL2RA/CD28/CD274/CD40LG/TNFSF13B/CD86/IL1B/PTPRC/CCL5/AIF1	11
BP	GO:0034341	response to interferon-gamma	12/69	140/18800	1.10558e-13	3.01454e-12	1.41758e-12	IRF1/MYC/IRF8/TP53/CD40/CD74/MRC1/CCL2/HCK/CCL5/TNF/AIF1	12
BP	GO:0002637	regulation of immunoglobulin production	10/69	74/18800	1.34153e-13	3.62338e-12	1.70388e-12	TBX21/STAT6/CD28/TGFB1/CD40LG/TLR9/CD40/CD86/PTPRC/TNF	10
BP	GO:0002702	positive regulation of production of molecular mediator of immune response	11/69	120/18800	5.99835e-13	1.60498e-11	7.54736e-12	TBX21/STAT6/CD28/TGFB1/TLR9/CD40/KIT/CD74/CD86/IL1B/PTPRC	11
BP	GO:0002312	B cell activation involved in immune response	10/69	86/18800	6.38879e-13	1.69362e-11	7.96419e-12	TBX21/STAT6/CD28/TGFB1/CD40LG/IRF8/CD40/CD19/PTPRC/SPI1	10
BP	GO:0002712	regulation of B cell mediated immunity	9/69	62/18800	1.22315e-12	3.18352e-11	1.49704e-11	TBX21/STAT6/CD28/TGFB1/CD40/PTPRC/BTK/PTPN6/TNF	9
BP	GO:0002889	regulation of immunoglobulin mediated immune response	9/69	62/18800	1.22315e-12	3.18352e-11	1.49704e-11	TBX21/STAT6/CD28/TGFB1/CD40/PTPRC/BTK/PTPN6/TNF	9
BP	GO:0030888	regulation of B cell proliferation	9/69	64/18800	1.65097e-12	4.25832e-11	2.00246e-11	CTLA4/TLR9/CD40/CD74/TNFSF13B/PTPRC/BTK/INPP5D/TYROBP	9
BP	GO:0002714	positive regulation of B cell mediated immunity	8/69	41/18800	1.87927e-12	4.71961e-11	2.21938e-11	TBX21/STAT6/CD28/TGFB1/CD40/PTPRC/BTK/TNF	8
BP	GO:0002891	positive regulation of immunoglobulin mediated immune response	8/69	41/18800	1.87927e-12	4.71961e-11	2.21938e-11	TBX21/STAT6/CD28/TGFB1/CD40/PTPRC/BTK/TNF	8
BP	GO:0042119	neutrophil activation	8/69	41/18800	1.87927e-12	4.71961e-11	2.21938e-11	CXCL8/SPI1/CCL5/FCER1G/ITGAM/ITGB2/TYROBP/TNF	8
BP	GO:0050777	negative regulation of immune response	12/69	179/18800	2.10608e-12	5.24324e-11	2.46561e-11	TBX21/STAT6/TNFAIP3/IL7R/CTLA4/FYN/PTPRC/HCK/PTPN6/SPI1/INPP5D/LGALS3	12
BP	GO:0031349	positive regulation of defense response	14/69	289/18800	2.17909e-12	5.37822e-11	2.52909e-11	CD28/IRF7/TLR9/FYN/IL1B/HCK/BTK/SPI1/CCL5/TYROBP/NFKBIA/TNF/EMILIN1/MDK	14
BP	GO:0050851	antigen receptor-mediated signaling pathway	13/69	244/18800	4.37041e-12	1.06944e-10	5.02902e-11	CD28/CTLA4/CD19/CD79B/LCK/CD79A/FYN/PTPRC/BTK/PTPN6/INPP5D/MAPK1/LGALS3	13
BP	GO:1903038	negative regulation of leukocyte cell-cell adhesion	11/69	144/18800	4.51285e-12	1.09494e-10	5.14891e-11	TBX21/IL2RA/IRF1/CD274/CXCL12/CTLA4/CD74/CD86/PTPN6/LGALS3/MDK	11
BP	GO:0034612	response to tumor necrosis factor	13/69	249/18800	5.6476e-12	1.35296e-10	6.36225e-11	TNFAIP3/TNFRSF1B/CXCL8/CD14/TP53/CD40/TNFSF13B/CCL2/CCL5/NFKBIA/TNF/MAPK1/THBS1	13
BP	GO:0002381	immunoglobulin production involved in immunoglobulin mediated immune response	9/69	73/18800	5.67081e-12	1.35296e-10	6.36225e-11	TBX21/STAT6/CD28/TGFB1/CD40LG/CD40/PTPRC/BTK/HLA-DRA	9
BP	GO:0045621	positive regulation of lymphocyte differentiation	10/69	107/18800	5.96965e-12	1.41249e-10	6.64218e-11	IL2RA/IL7R/CD83/CD74/CD86/PTPRC/BTK/INPP5D/HLA-DRA/MDK	10
BP	GO:0036230	granulocyte activation	8/69	47/18800	6.07849e-12	1.42645e-10	6.70784e-11	CXCL8/SPI1/CCL5/FCER1G/ITGAM/ITGB2/TYROBP/TNF	8
BP	GO:0071887	leukocyte apoptotic process	10/69	109/18800	7.20193e-12	1.67635e-10	7.88299e-11	IL2RA/IL7R/CD274/IRF7/CXCL12/TP53/CD74/BTK/CCL5/LGALS3	10
BP	GO:0050871	positive regulation of B cell activation	11/69	152/18800	8.1663e-12	1.88549e-10	8.86647e-11	TBX21/STAT6/CD28/TGFB1/TLR9/CD40/CD74/TNFSF13B/PTPRC/BTK/INPP5D	11
BP	GO:0009612	response to mechanical stimulus	12/69	201/18800	8.29688e-12	1.90032e-10	8.93617e-11	IRF1/CXCL12/CD40/KIT/FYN/IL1B/CXCL10/NFKBIA/TNF/THBS1/PTK2/MDK	12
BP	GO:0050730	regulation of peptidyl-tyrosine phosphorylation	13/69	261/18800	1.02211e-11	2.32247e-10	1.09213e-10	CD3E/CD44/TGFB1/TP53/CD40/KIT/CD74/FYN/PTPRC/PTPN6/CCL5/ITGB2/TNF	13
BP	GO:0002639	positive regulation of immunoglobulin production	8/69	51/18800	1.21672e-11	2.74288e-10	1.28983e-10	TBX21/STAT6/CD28/TGFB1/TLR9/CD40/CD86/PTPRC	8
BP	GO:0002286	T cell activation involved in immune response	10/69	116/18800	1.35059e-11	3.02088e-10	1.42056e-10	TBX21/STAT6/TP53/CD74/CD86/ICAM1/FCER1G/HLA-DRA/LGALS3/MDK	10
BP	GO:0002708	positive regulation of lymphocyte mediated immunity	10/69	117/18800	1.47258e-11	3.26822e-10	1.53687e-10	TBX21/STAT6/CD28/TGFB1/CD40/IL1B/PTPRC/BTK/HLA-DRA/TNF	10
BP	GO:0071346	cellular response to interferon-gamma	10/69	118/18800	1.60433e-11	3.53323e-10	1.66149e-10	IRF1/MYC/IRF8/TP53/MRC1/CCL2/HCK/CCL5/TNF/AIF1	10
BP	GO:0002377	immunoglobulin production	12/69	218/18800	2.15154e-11	4.70218e-10	2.21118e-10	TBX21/STAT6/CD28/TGFB1/CD40LG/TLR9/CD40/CD86/PTPRC/BTK/HLA-DRA/TNF	12
BP	GO:2000106	regulation of leukocyte apoptotic process	9/69	85/18800	2.32329e-11	5.03907e-10	2.36961e-10	IL7R/CD274/IRF7/CXCL12/TP53/CD74/BTK/CCL5/LGALS3	9
BP	GO:0002224	toll-like receptor signaling pathway	10/69	123/18800	2.4345e-11	5.24058e-10	2.46436e-10	TNFAIP3/IRF1/CD14/IRF7/TLR9/CD40/CTSS/BTK/NFKBIA/TNF	10
BP	GO:0050868	negative regulation of T cell activation	10/69	125/18800	2.86186e-11	6.11456e-10	2.87535e-10	TBX21/IL2RA/IRF1/CD274/CTLA4/CD74/CD86/PTPN6/LGALS3/MDK	10
BP	GO:0071356	cellular response to tumor necrosis factor	12/69	229/18800	3.82253e-11	8.10658e-10	3.81209e-10	TNFAIP3/TNFRSF1B/CXCL8/TP53/CD40/TNFSF13B/CCL2/CCL5/NFKBIA/TNF/MAPK1/THBS1	12
BP	GO:0070664	negative regulation of leukocyte proliferation	9/69	91/18800	4.34676e-11	9.15058e-10	4.30303e-10	IL2RA/TNFAIP3/CD274/CTLA4/CD86/BTK/PTPN6/INPP5D/TYROBP	9
BP	GO:0002275	myeloid cell activation involved in immune response	9/69	93/18800	5.30366e-11	1.10835e-09	5.21197e-10	KIT/RAC2/BTK/PTPN6/SPI1/FCER1G/ITGAM/ITGB2/TYROBP	9
BP	GO:0032623	interleukin-2 production	8/69	63/18800	7.14793e-11	1.47227e-09	6.92329e-10	TBX21/CD3E/CD28/TNFAIP3/CD83/CD86/IL1B/PTPRC	8
BP	GO:0032663	regulation of interleukin-2 production	8/69	63/18800	7.14793e-11	1.47227e-09	6.92329e-10	TBX21/CD3E/CD28/TNFAIP3/CD83/CD86/IL1B/PTPRC	8
BP	GO:0050731	positive regulation of peptidyl-tyrosine phosphorylation	11/69	190/18800	9.20138e-11	1.88168e-09	8.84855e-10	CD3E/CD44/TGFB1/TP53/CD40/KIT/CD74/FYN/PTPRC/CCL5/TNF	11
BP	GO:0050727	regulation of inflammatory response	14/69	394/18800	1.36086e-10	2.76322e-09	1.29939e-09	IL2RA/CD28/TNFAIP3/TNFRSF1B/TLR9/FYN/IL1B/PTPRC/HCK/BTK/CCL5/NFKBIA/TNF/MDK	14
BP	GO:0033674	positive regulation of kinase activity	15/69	476/18800	1.46449e-10	2.9527e-09	1.3885e-09	TGFB1/CD40LG/TLR9/CD40/CD19/KIT/CD74/CD86/CSF1/IL1B/PTPRC/CCL5/TNF/THBS1/PTK2	15
BP	GO:0046634	regulation of alpha-beta T cell activation	9/69	105/18800	1.60068e-10	3.20471e-09	1.507e-09	TBX21/CD3E/CD28/IRF1/CD83/CD274/CD86/PTPRC/HLA-DRA	9
BP	GO:0070371	ERK1 and ERK2 cascade	13/69	335/18800	2.28194e-10	4.53695e-09	2.13348e-09	CD44/MYC/TGFB1/CD74/IL1B/CCL2/PTPRC/PTPN6/CCL5/ICAM1/TNF/MAPK1/EMILIN1	13
BP	GO:0150076	neuroinflammatory response	8/69	73/18800	2.41021e-10	4.75892e-09	2.23787e-09	TNFRSF1B/IL1B/PTPRC/ITGAM/ITGB2/TYROBP/TNF/AIF1	8
BP	GO:0046631	alpha-beta T cell activation	10/69	158/18800	2.9325e-10	5.7505e-09	2.70415e-09	TBX21/CD3E/STAT6/CD28/IRF1/CD83/CD274/CD86/PTPRC/HLA-DRA	10
BP	GO:0070227	lymphocyte apoptotic process	8/69	75/18800	3.00758e-10	5.85763e-09	2.75453e-09	IL2RA/IL7R/CD274/TP53/CD74/BTK/CCL5/LGALS3	8
BP	GO:0043491	protein kinase B signaling	11/69	216/18800	3.63129e-10	7.02458e-09	3.30329e-09	CD28/TGFB1/IGFBP5/CD40/IL1B/CCL2/CCL5/TNF/THBS1/PTK2/P2RX4	11
BP	GO:0033077	T cell differentiation in thymus	8/69	78/18800	4.14375e-10	7.96211e-09	3.74415e-09	CD3E/CD3D/CD28/IL7R/TP53/CD74/IL1B/PTPRC	8
BP	GO:0045058	T cell selection	7/69	49/18800	4.98948e-10	9.52325e-09	4.47828e-09	TBX21/CD3E/CD3D/STAT6/CD28/CD74/PTPRC	7
BP	GO:0001818	negative regulation of cytokine production	13/69	363/18800	6.10101e-10	1.15677e-08	5.43966e-09	TBX21/TNFAIP3/CD83/CD274/TGFB1/TLR9/PTPRC/BTK/PTPN6/INPP5D/TYROBP/TNF/THBS1	13
BP	GO:0045830	positive regulation of isotype switching	6/69	28/18800	6.91868e-10	1.30317e-08	6.12811e-09	TBX21/STAT6/CD28/TGFB1/CD40/PTPRC	6
BP	GO:0050672	negative regulation of lymphocyte proliferation	8/69	84/18800	7.572e-10	1.39593e-08	6.5643e-09	IL2RA/CD274/CTLA4/CD86/BTK/PTPN6/INPP5D/TYROBP	8
BP	GO:2001233	regulation of apoptotic signaling pathway	13/69	370/18800	7.70044e-10	1.39593e-08	6.5643e-09	CD44/TNFAIP3/MYC/CXCL12/TP53/CD74/LCK/IL1B/PTPRC/ICAM1/TNF/LGALS3/THBS1	13
BP	GO:0002204	somatic recombination of immunoglobulin genes involved in immune response	7/69	52/18800	7.70368e-10	1.39593e-08	6.5643e-09	TBX21/STAT6/CD28/TGFB1/CD40LG/CD40/PTPRC	7
BP	GO:0002208	somatic diversification of immunoglobulins involved in immune response	7/69	52/18800	7.70368e-10	1.39593e-08	6.5643e-09	TBX21/STAT6/CD28/TGFB1/CD40LG/CD40/PTPRC	7
BP	GO:0038093	Fc receptor signaling pathway	7/69	52/18800	7.70368e-10	1.39593e-08	6.5643e-09	KIT/FYN/PTPRC/HCK/BTK/FCER1G/PTK2	7
BP	GO:0045190	isotype switching	7/69	52/18800	7.70368e-10	1.39593e-08	6.5643e-09	TBX21/STAT6/CD28/TGFB1/CD40LG/CD40/PTPRC	7
BP	GO:0032945	negative regulation of mononuclear cell proliferation	8/69	85/18800	8.33456e-10	1.50075e-08	7.0572e-09	IL2RA/CD274/CTLA4/CD86/BTK/PTPN6/INPP5D/TYROBP	8
BP	GO:0002221	pattern recognition receptor signaling pathway	10/69	176/18800	8.44336e-10	1.51083e-08	7.10465e-09	TNFAIP3/IRF1/CD14/IRF7/TLR9/CD40/CTSS/BTK/NFKBIA/TNF	10
BP	GO:0050852	T cell receptor signaling pathway	9/69	127/18800	8.85978e-10	1.5755e-08	7.40874e-09	CD28/CTLA4/LCK/FYN/PTPRC/PTPN6/INPP5D/MAPK1/LGALS3	9
BP	GO:0061900	glial cell activation	7/69	54/18800	1.01391e-09	1.79187e-08	8.42623e-09	IL1B/PTPRC/ITGAM/ITGB2/TYROBP/TNF/AIF1	7
BP	GO:0050853	B cell receptor signaling pathway	9/69	131/18800	1.1683e-09	2.05205e-08	9.64968e-09	CTLA4/CD19/CD79B/LCK/CD79A/PTPRC/BTK/PTPN6/MAPK1	9
BP	GO:0097696	STAT cascade	10/69	184/18800	1.30197e-09	2.27288e-08	1.06882e-08	STAT6/IL7R/TGFB1/CD40/KIT/FYN/CCL2/PTPRC/CCL5/TNF	10
BP	GO:0070228	regulation of lymphocyte apoptotic process	7/69	57/18800	1.50056e-09	2.59616e-08	1.22083e-08	IL7R/CD274/TP53/CD74/BTK/CCL5/LGALS3	7
BP	GO:0030099	myeloid cell differentiation	13/69	391/18800	1.50528e-09	2.59616e-08	1.22083e-08	MYC/TGFB1/IRF7/IRF8/KIT/CD74/CSF1/PTPN6/SPI1/INPP5D/TYROBP/NFKBIA/TNF	13
BP	GO:0071706	tumor necrosis factor superfamily cytokine production	10/69	187/18800	1.52357e-09	2.59641e-08	1.22096e-08	TNFAIP3/CD274/CD14/TLR9/CD86/PTPRC/PTPN6/TYROBP/CD2/THBS1	10
BP	GO:1903555	regulation of tumor necrosis factor superfamily cytokine production	10/69	187/18800	1.52357e-09	2.59641e-08	1.22096e-08	TNFAIP3/CD274/CD14/TLR9/CD86/PTPRC/PTPN6/TYROBP/CD2/THBS1	10
BP	GO:0045860	positive regulation of protein kinase activity	13/69	396/18800	1.7554e-09	2.9738e-08	1.39842e-08	TGFB1/CD40LG/TLR9/CD40/KIT/CD86/CSF1/IL1B/PTPRC/CCL5/TNF/THBS1/PTK2	13
BP	GO:0045582	positive regulation of T cell differentiation	8/69	94/18800	1.87831e-09	3.14479e-08	1.47883e-08	IL2RA/IL7R/CD83/CD74/CD86/PTPRC/HLA-DRA/MDK	8
BP	GO:1904035	regulation of epithelial cell apoptotic process	8/69	94/18800	1.87831e-09	3.14479e-08	1.47883e-08	TNFAIP3/CD40LG/CD40/CCL2/ICAM1/TNF/THBS1/MDK	8
BP	GO:2000351	regulation of endothelial cell apoptotic process	7/69	59/18800	1.92508e-09	3.20436e-08	1.50684e-08	TNFAIP3/CD40LG/CD40/CCL2/ICAM1/TNF/THBS1	7
BP	GO:0032633	interleukin-4 production	6/69	33/18800	2.00496e-09	3.29897e-08	1.55133e-08	CD3E/CD28/CD83/CD40LG/CD86/FCER1G	6
BP	GO:0032673	regulation of interleukin-4 production	6/69	33/18800	2.00496e-09	3.29897e-08	1.55133e-08	CD3E/CD28/CD83/CD40LG/CD86/FCER1G	6
BP	GO:0016447	somatic recombination of immunoglobulin gene segments	7/69	60/18800	2.17304e-09	3.5551e-08	1.67177e-08	TBX21/STAT6/CD28/TGFB1/CD40LG/CD40/PTPRC	7
BP	GO:0043410	positive regulation of MAPK cascade	14/69	491/18800	2.37213e-09	3.85875e-08	1.81456e-08	CD44/TGFB1/TLR9/CD40/KIT/CD74/IL1B/CCL2/PTPRC/SPI1/CCL5/ICAM1/TNF/THBS1	14
BP	GO:0032743	positive regulation of interleukin-2 production	6/69	34/18800	2.4276e-09	3.92668e-08	1.84651e-08	CD3E/CD28/CD83/CD86/IL1B/PTPRC	6
BP	GO:0034113	heterotypic cell-cell adhesion	7/69	61/18800	2.44765e-09	3.93686e-08	1.8513e-08	CD44/LCK/IL1B/PTPRC/ITGB2/TNF/CD2	7
BP	GO:0002718	regulation of cytokine production involved in immune response	8/69	98/18800	2.62482e-09	4.19825e-08	1.97421e-08	TBX21/TNFRSF1B/TGFB1/KIT/CD74/IL1B/BTK/TNF	8
BP	GO:0002367	cytokine production involved in immune response	8/69	100/18800	3.08598e-09	4.85478e-08	2.28294e-08	TBX21/TNFRSF1B/TGFB1/KIT/CD74/IL1B/BTK/TNF	8
BP	GO:0032615	interleukin-12 production	7/69	63/18800	3.08617e-09	4.85478e-08	2.28294e-08	IRF1/CD40LG/IRF8/TLR9/CD40/THBS1/MDK	7
BP	GO:0032655	regulation of interleukin-12 production	7/69	63/18800	3.08617e-09	4.85478e-08	2.28294e-08	IRF1/CD40LG/IRF8/TLR9/CD40/THBS1/MDK	7
BP	GO:2000377	regulation of reactive oxygen species metabolic process	9/69	147/18800	3.24691e-09	5.07973e-08	2.38873e-08	TGFB1/TP53/FYN/RAC2/ITGAM/ITGB2/TYROBP/TNF/THBS1	9
BP	GO:0043368	positive T cell selection	6/69	36/18800	3.49567e-09	5.43919e-08	2.55776e-08	TBX21/CD3E/CD3D/STAT6/CD74/PTPRC	6
BP	GO:0072577	endothelial cell apoptotic process	7/69	65/18800	3.86099e-09	5.97514e-08	2.80979e-08	TNFAIP3/CD40LG/CD40/CCL2/ICAM1/TNF/THBS1	7
BP	GO:0045637	regulation of myeloid cell differentiation	10/69	208/18800	4.26379e-09	6.56302e-08	3.08624e-08	MYC/TGFB1/IRF7/CD74/CSF1/SPI1/INPP5D/TYROBP/NFKBIA/TNF	10
BP	GO:0071677	positive regulation of mononuclear cell migration	7/69	66/18800	4.3066e-09	6.59348e-08	3.10056e-08	CXCL12/SPI1/CCL5/CXCL10/TNF/AIF1/LGALS3	7
BP	GO:0002573	myeloid leukocyte differentiation	10/69	210/18800	4.67502e-09	7.11946e-08	3.3479e-08	MYC/TGFB1/IRF7/KIT/CD74/CSF1/SPI1/INPP5D/TYROBP/TNF	10
BP	GO:0042116	macrophage activation	8/69	106/18800	4.91519e-09	7.4229e-08	3.49059e-08	CD74/PTPRC/ITGAM/ITGB2/TYROBP/TNF/AIF1/THBS1	8
BP	GO:0045191	regulation of isotype switching	6/69	38/18800	4.92613e-09	7.4229e-08	3.49059e-08	TBX21/STAT6/CD28/TGFB1/CD40/PTPRC	6
BP	GO:0002831	regulation of response to biotic stimulus	12/69	351/18800	5.04493e-09	7.56211e-08	3.55605e-08	TNFAIP3/IRF1/CD274/IRF7/FYN/IL1B/HCK/PTPN6/SPI1/CCL5/TYROBP/EMILIN1	12
BP	GO:0016445	somatic diversification of immunoglobulins	7/69	69/18800	5.91464e-09	8.81959e-08	4.14738e-08	TBX21/STAT6/CD28/TGFB1/CD40LG/CD40/PTPRC	7
BP	GO:0002283	neutrophil activation involved in immune response	5/69	19/18800	6.42042e-09	9.47508e-08	4.45562e-08	SPI1/FCER1G/ITGAM/ITGB2/TYROBP	5
BP	GO:0002888	positive regulation of myeloid leukocyte mediated immunity	5/69	19/18800	6.42042e-09	9.47508e-08	4.45562e-08	BTK/SPI1/ITGAM/ITGB2/TYROBP	5
BP	GO:0002562	somatic diversification of immune receptors via germline recombination within a single locus	7/69	70/18800	6.55285e-09	9.57185e-08	4.50113e-08	TBX21/STAT6/CD28/TGFB1/CD40LG/CD40/PTPRC	7
BP	GO:0016444	somatic cell DNA recombination	7/69	70/18800	6.55285e-09	9.57185e-08	4.50113e-08	TBX21/STAT6/CD28/TGFB1/CD40LG/CD40/PTPRC	7
BP	GO:0002698	negative regulation of immune effector process	8/69	112/18800	7.61629e-09	1.10337e-07	5.18854e-08	TBX21/IL7R/TGFB1/PTPRC/PTPN6/SPI1/TNF/LGALS3	8
BP	GO:0097191	extrinsic apoptotic signaling pathway	10/69	221/18800	7.63068e-09	1.10337e-07	5.18854e-08	TNFAIP3/TNFRSF1B/TGFB1/IL1B/PTPRC/SPI1/ICAM1/TNF/LGALS3/THBS1	10
BP	GO:0045655	regulation of monocyte differentiation	5/69	20/18800	8.53628e-09	1.22811e-07	5.77514e-08	MYC/IRF7/CD74/CSF1/INPP5D	5
BP	GO:0032735	positive regulation of interleukin-12 production	6/69	42/18800	9.25346e-09	1.32463e-07	6.22904e-08	IRF1/CD40LG/IRF8/TLR9/CD40/MDK	6
BP	GO:0043406	positive regulation of MAP kinase activity	8/69	116/18800	1.0059e-08	1.43278e-07	6.7376e-08	TGFB1/TLR9/CD40/KIT/IL1B/PTPRC/TNF/THBS1	8
BP	GO:0002437	inflammatory response to antigenic stimulus	7/69	75/18800	1.0694e-08	1.50357e-07	7.07051e-08	IL2RA/CD28/FYN/CD68/HCK/BTK/TNF	7
BP	GO:0002761	regulation of myeloid leukocyte differentiation	8/69	117/18800	1.07661e-08	1.50357e-07	7.07051e-08	MYC/TGFB1/IRF7/CD74/CSF1/INPP5D/TYROBP/TNF	8
BP	GO:0032609	interferon-gamma production	8/69	117/18800	1.07661e-08	1.50357e-07	7.07051e-08	CD3E/CD274/CD14/IRF8/TLR9/IL1B/TNF/CD2	8
BP	GO:0032649	regulation of interferon-gamma production	8/69	117/18800	1.07661e-08	1.50357e-07	7.07051e-08	CD3E/CD274/CD14/IRF8/TLR9/IL1B/TNF/CD2	8
BP	GO:1904019	epithelial cell apoptotic process	8/69	118/18800	1.15157e-08	1.60046e-07	7.5261e-08	TNFAIP3/CD40LG/CD40/CCL2/ICAM1/TNF/THBS1/MDK	8
BP	GO:0043299	leukocyte degranulation	7/69	76/18800	1.17448e-08	1.62442e-07	7.63878e-08	KIT/RAC2/HCK/BTK/SPI1/ITGAM/ITGB2	7
BP	GO:0032729	positive regulation of interferon-gamma production	7/69	77/18800	1.2882e-08	1.75662e-07	8.26043e-08	CD3E/CD14/IRF8/TLR9/IL1B/TNF/CD2	7
BP	GO:0032635	interleukin-6 production	9/69	172/18800	1.28847e-08	1.75662e-07	8.26043e-08	TNFAIP3/TLR9/CD74/IL1B/PTPN6/INPP5D/TYROBP/TNF/AIF1	9
BP	GO:0032675	regulation of interleukin-6 production	9/69	172/18800	1.28847e-08	1.75662e-07	8.26043e-08	TNFAIP3/TLR9/CD74/IL1B/PTPN6/INPP5D/TYROBP/TNF/AIF1	9
BP	GO:0007259	JAK-STAT cascade	9/69	173/18800	1.35526e-08	1.83892e-07	8.64745e-08	STAT6/IL7R/CD40/KIT/FYN/CCL2/PTPRC/CCL5/TNF	9
BP	GO:0045061	thymic T cell selection	5/69	22/18800	1.4417e-08	1.94697e-07	9.15558e-08	CD3E/CD3D/CD28/CD74/PTPRC	5
BP	GO:0070372	regulation of ERK1 and ERK2 cascade	11/69	311/18800	1.65359e-08	2.22264e-07	1.04519e-07	CD44/TGFB1/CD74/IL1B/CCL2/PTPRC/PTPN6/CCL5/ICAM1/TNF/EMILIN1	11
BP	GO:0002200	somatic diversification of immune receptors	7/69	80/18800	1.687e-08	2.25696e-07	1.06133e-07	TBX21/STAT6/CD28/TGFB1/CD40LG/CD40/PTPRC	7
BP	GO:0009615	response to virus	12/69	392/18800	1.72513e-08	2.29723e-07	1.08027e-07	TBX21/TNFAIP3/IRF1/IRF7/CXCL12/TLR9/CD40/IL1B/PTPRC/CCL5/CXCL10/TNF	12
BP	GO:1901214	regulation of neuron death	11/69	313/18800	1.76633e-08	2.3412e-07	1.10094e-07	TNFRSF1B/TP53/FYN/CSF1/CCL2/CCL5/ITGAM/ITGB2/TYROBP/TNF/MDK	11
BP	GO:0001774	microglial cell activation	6/69	47/18800	1.86705e-08	2.4633e-07	1.15836e-07	PTPRC/ITGAM/ITGB2/TYROBP/TNF/AIF1	6
BP	GO:0043405	regulation of MAP kinase activity	9/69	183/18800	2.20919e-08	2.90134e-07	1.36435e-07	TGFB1/TLR9/CD40/KIT/IL1B/PTPRC/PTPN6/TNF/THBS1	9
BP	GO:1901652	response to peptide	13/69	491/18800	2.28674e-08	2.98947e-07	1.40579e-07	STAT6/TNFAIP3/MYC/CXCL12/IGFBP5/TP53/FYN/IL1B/ICAM1/NFKBIA/TNF/RARRES2/PTK2	13
BP	GO:0090023	positive regulation of neutrophil chemotaxis	5/69	24/18800	2.31377e-08	3.01106e-07	1.41594e-07	CXCL8/CD74/RAC2/C3AR1/MDK	5
BP	GO:0051924	regulation of calcium ion transport	10/69	251/18800	2.5633e-08	3.32068e-07	1.56154e-07	CXCL12/TLR9/CD19/FYN/CCL2/PTPN6/CCL5/CXCL10/LGALS3/P2RX4	10
BP	GO:0001910	regulation of leukocyte mediated cytotoxicity	7/69	85/18800	2.58358e-08	3.33189e-07	1.56681e-07	IL7R/PTPRC/SPI1/ICAM1/ITGAM/HLA-DRA/TYROBP	7
BP	GO:0001909	leukocyte mediated cytotoxicity	8/69	131/18800	2.62258e-08	3.36702e-07	1.58333e-07	IL7R/PTPRC/PTPN6/SPI1/ICAM1/ITGAM/HLA-DRA/TYROBP	8
BP	GO:0002269	leukocyte activation involved in inflammatory response	6/69	50/18800	2.73934e-08	3.48565e-07	1.63912e-07	PTPRC/ITGAM/ITGB2/TYROBP/TNF/AIF1	6
BP	GO:0070231	T cell apoptotic process	6/69	50/18800	2.73934e-08	3.48565e-07	1.63912e-07	IL2RA/IL7R/CD274/TP53/CCL5/LGALS3	6
BP	GO:0033627	cell adhesion mediated by integrin	7/69	86/18800	2.80438e-08	3.55263e-07	1.67061e-07	CD3E/PTPN6/CCL5/ICAM1/ITGAM/ITGB2/PTK2	7
BP	GO:0032753	positive regulation of interleukin-4 production	5/69	25/18800	2.88402e-08	3.63742e-07	1.71048e-07	CD3E/CD28/CD40LG/CD86/FCER1G	5
BP	GO:0048304	positive regulation of isotype switching to IgG isotypes	4/69	10/18800	3.43151e-08	4.30896e-07	2.02627e-07	TBX21/CD28/CD40/PTPRC	4
BP	GO:0006816	calcium ion transport	12/69	424/18800	4.09208e-08	5.116e-07	2.40578e-07	CXCL12/TLR9/CD19/LCK/FYN/CCL2/PTPRC/PTPN6/CCL5/CXCL10/LGALS3/P2RX4	12
BP	GO:0071624	positive regulation of granulocyte chemotaxis	5/69	27/18800	4.35739e-08	5.424e-07	2.55062e-07	CXCL8/CD74/RAC2/C3AR1/MDK	5
BP	GO:0045060	negative thymic T cell selection	4/69	11/18800	5.37746e-08	6.6648e-07	3.1341e-07	CD3E/CD28/CD74/PTPRC	4
BP	GO:0048661	positive regulation of smooth muscle cell proliferation	7/69	95/18800	5.61915e-08	6.93432e-07	3.26084e-07	MYC/TGFB1/IGFBP5/CCL5/TNF/AIF1/THBS1	7
BP	GO:0070997	neuron death	11/69	353/18800	6.03631e-08	7.41715e-07	3.48789e-07	TNFRSF1B/TP53/FYN/CSF1/CCL2/CCL5/ITGAM/ITGB2/TYROBP/TNF/MDK	11
BP	GO:0050673	epithelial cell proliferation	12/69	443/18800	6.60547e-08	8.08183e-07	3.80045e-07	STAT6/TNFAIP3/MYC/TGFB1/CXCL12/IGFBP5/KIT/CCL2/TNF/MAPK1/THBS1/MDK	12
BP	GO:0071902	positive regulation of protein serine/threonine kinase activity	9/69	208/18800	6.66765e-08	8.12318e-07	3.8199e-07	TGFB1/CD40LG/TLR9/CD40/KIT/IL1B/PTPRC/TNF/THBS1	9
BP	GO:0002886	regulation of myeloid leukocyte mediated immunity	6/69	59/18800	7.56886e-08	9.18205e-07	4.31783e-07	RAC2/BTK/SPI1/ITGAM/ITGB2/TYROBP	6
BP	GO:0038094	Fc-gamma receptor signaling pathway	5/69	30/18800	7.6265e-08	9.21294e-07	4.33235e-07	FYN/PTPRC/HCK/FCER1G/PTK2	5
BP	GO:0031341	regulation of cell killing	7/69	100/18800	8.02329e-08	9.63584e-07	4.53122e-07	IL7R/PTPRC/SPI1/ICAM1/ITGAM/HLA-DRA/TYROBP	7
BP	GO:0043383	negative T cell selection	4/69	12/18800	8.04389e-08	9.63584e-07	4.53122e-07	CD3E/CD28/CD74/PTPRC	4
BP	GO:0032677	regulation of interleukin-8 production	7/69	102/18800	9.20263e-08	1.09324e-06	5.14093e-07	CD14/TLR9/CD74/IL1B/PTPRC/TNF/CD2	7
BP	GO:1902106	negative regulation of leukocyte differentiation	7/69	102/18800	9.20263e-08	1.09324e-06	5.14093e-07	TBX21/IRF1/MYC/CTLA4/CD74/INPP5D/MDK	7
BP	GO:0032637	interleukin-8 production	7/69	103/18800	9.84515e-08	1.16474e-06	5.47714e-07	CD14/TLR9/CD74/IL1B/PTPRC/TNF/CD2	7
BP	GO:0032757	positive regulation of interleukin-8 production	6/69	62/18800	1.02379e-07	1.20128e-06	5.649e-07	CD14/TLR9/CD74/IL1B/TNF/CD2	6
BP	GO:0071900	regulation of protein serine/threonine kinase activity	11/69	372/18800	1.02597e-07	1.20128e-06	5.649e-07	TNFAIP3/TGFB1/CD40LG/TLR9/CD40/KIT/IL1B/PTPRC/PTPN6/TNF/THBS1	11
BP	GO:0042063	gliogenesis	10/69	291/18800	1.02799e-07	1.20128e-06	5.649e-07	TNFRSF1B/MYC/TGFB1/CSF1/IL1B/CCL2/TNF/MAPK1/MDK/P2RX4	10
BP	GO:0002444	myeloid leukocyte mediated immunity	7/69	104/18800	1.05252e-07	1.22494e-06	5.76024e-07	KIT/RAC2/BTK/SPI1/ITGAM/ITGB2/TYROBP	7
BP	GO:1902624	positive regulation of neutrophil migration	5/69	32/18800	1.0716e-07	1.24211e-06	5.84096e-07	CXCL8/CD74/RAC2/C3AR1/MDK	5
BP	GO:0032613	interleukin-10 production	6/69	63/18800	1.12831e-07	1.29733e-06	6.10067e-07	CD28/CD83/CD274/CD40LG/TLR9/TYROBP	6
BP	GO:0032653	regulation of interleukin-10 production	6/69	63/18800	1.12831e-07	1.29733e-06	6.10067e-07	CD28/CD83/CD274/CD40LG/TLR9/TYROBP	6
BP	GO:1903707	negative regulation of hemopoiesis	7/69	106/18800	1.20047e-07	1.37478e-06	6.46485e-07	TBX21/IRF1/MYC/CTLA4/CD74/INPP5D/MDK	7
BP	GO:0014015	positive regulation of gliogenesis	6/69	64/18800	1.24146e-07	1.41606e-06	6.65896e-07	TNFRSF1B/MYC/TGFB1/IL1B/TNF/MDK	6
BP	GO:0002431	Fc receptor mediated stimulatory signaling pathway	5/69	33/18800	1.25938e-07	1.41953e-06	6.67529e-07	FYN/PTPRC/HCK/FCER1G/PTK2	5
BP	GO:0045589	regulation of regulatory T cell differentiation	5/69	33/18800	1.25938e-07	1.41953e-06	6.67529e-07	CD28/IRF1/CTLA4/HLA-DRA/MDK	5
BP	GO:0090022	regulation of neutrophil chemotaxis	5/69	33/18800	1.25938e-07	1.41953e-06	6.67529e-07	CXCL8/CD74/RAC2/C3AR1/MDK	5
BP	GO:0019882	antigen processing and presentation	7/69	107/18800	1.2808e-07	1.43239e-06	6.73576e-07	CD74/CD68/CTSS/ICAM1/FCER1G/HLA-DRA/THBS1	7
BP	GO:1903557	positive regulation of tumor necrosis factor superfamily cytokine production	7/69	107/18800	1.2808e-07	1.43239e-06	6.73576e-07	CD14/TLR9/CD86/PTPRC/TYROBP/CD2/THBS1	7
BP	GO:0051052	regulation of DNA metabolic process	12/69	472/18800	1.314e-07	1.4638e-06	6.88348e-07	TBX21/STAT6/CD28/IL7R/MYC/TGFB1/TP53/CD40/PTPRC/SPI1/TNF/MAPK1	12
BP	GO:0070232	regulation of T cell apoptotic process	5/69	34/18800	1.47233e-07	1.63383e-06	7.68303e-07	IL7R/CD274/TP53/CCL5/LGALS3	5
BP	GO:1901222	regulation of NIK/NF-kappaB signaling	7/69	110/18800	1.54952e-07	1.71285e-06	8.05461e-07	CD14/TLR9/CD86/IL1B/SPI1/NFKBIA/TNF	7
BP	GO:2001234	negative regulation of apoptotic signaling pathway	9/69	230/18800	1.57303e-07	1.73215e-06	8.14538e-07	CD44/TNFAIP3/CXCL12/CD74/IL1B/ICAM1/TNF/LGALS3/THBS1	9
BP	GO:0045059	positive thymic T cell selection	4/69	14/18800	1.61767e-07	1.76771e-06	8.31258e-07	CD3E/CD3D/CD74/PTPRC	4
BP	GO:0048302	regulation of isotype switching to IgG isotypes	4/69	14/18800	1.61767e-07	1.76771e-06	8.31258e-07	TBX21/CD28/CD40/PTPRC	4
BP	GO:0045088	regulation of innate immune response	9/69	231/18800	1.63208e-07	1.76994e-06	8.3231e-07	TNFAIP3/IRF1/IRF7/FYN/HCK/PTPN6/SPI1/CCL5/TYROBP	9
BP	GO:0072593	reactive oxygen species metabolic process	9/69	231/18800	1.63208e-07	1.76994e-06	8.3231e-07	TGFB1/TP53/FYN/RAC2/ITGAM/ITGB2/TYROBP/TNF/THBS1	9
BP	GO:0072678	T cell migration	6/69	67/18800	1.63827e-07	1.76995e-06	8.32314e-07	CXCL12/CCL2/CCL5/ICAM1/CXCL10/AIF1	6
BP	GO:0050869	negative regulation of B cell activation	5/69	35/18800	1.71285e-07	1.84357e-06	8.66931e-07	TNFAIP3/CTLA4/BTK/INPP5D/TYROBP	5
BP	GO:0002456	T cell mediated immunity	7/69	112/18800	1.7539e-07	1.88068e-06	8.84383e-07	TBX21/IL7R/TNFRSF1B/IL1B/PTPRC/ICAM1/HLA-DRA	7
BP	GO:0046635	positive regulation of alpha-beta T cell activation	6/69	69/18800	1.95666e-07	2.08776e-06	9.8176e-07	CD3E/CD28/CD83/CD86/PTPRC/HLA-DRA	6
BP	GO:0048660	regulation of smooth muscle cell proliferation	8/69	170/18800	1.98235e-07	2.08776e-06	9.8176e-07	TNFAIP3/MYC/TGFB1/IGFBP5/CCL5/TNF/AIF1/THBS1	8
BP	GO:0002504	antigen processing and presentation of peptide or polysaccharide antigen via MHC class II	5/69	36/18800	1.98348e-07	2.08776e-06	9.8176e-07	CD74/CTSS/FCER1G/HLA-DRA/THBS1	5
BP	GO:0030224	monocyte differentiation	5/69	36/18800	1.98348e-07	2.08776e-06	9.8176e-07	MYC/IRF7/CD74/CSF1/INPP5D	5
BP	GO:0045066	regulatory T cell differentiation	5/69	36/18800	1.98348e-07	2.08776e-06	9.8176e-07	CD28/IRF1/CTLA4/HLA-DRA/MDK	5
BP	GO:0002548	monocyte chemotaxis	6/69	70/18800	2.13395e-07	2.22975e-06	1.04853e-06	CXCL12/CCL2/CCL5/CXCL10/AIF1/LGALS3	6
BP	GO:0045911	positive regulation of DNA recombination	6/69	70/18800	2.13395e-07	2.22975e-06	1.04853e-06	TBX21/STAT6/CD28/TGFB1/CD40/PTPRC	6
BP	GO:0002468	dendritic cell antigen processing and presentation	4/69	15/18800	2.19982e-07	2.2655e-06	1.06534e-06	CD74/CD68/HLA-DRA/THBS1	4
BP	GO:0034116	positive regulation of heterotypic cell-cell adhesion	4/69	15/18800	2.19982e-07	2.2655e-06	1.06534e-06	CD44/LCK/IL1B/TNF	4
BP	GO:0048291	isotype switching to IgG isotypes	4/69	15/18800	2.19982e-07	2.2655e-06	1.06534e-06	TBX21/CD28/CD40/PTPRC	4
BP	GO:1902563	regulation of neutrophil activation	4/69	15/18800	2.19982e-07	2.2655e-06	1.06534e-06	SPI1/ITGAM/ITGB2/TNF	4
BP	GO:0048659	smooth muscle cell proliferation	8/69	173/18800	2.26707e-07	2.32512e-06	1.09338e-06	TNFAIP3/MYC/TGFB1/IGFBP5/CCL5/TNF/AIF1/THBS1	8
BP	GO:0006959	humoral immune response	10/69	317/18800	2.27395e-07	2.32512e-06	1.09338e-06	CD28/CXCL8/CD83/IL1B/CCL2/PTPRC/PTPN6/CXCL10/TNF/RARRES2	10
BP	GO:0046640	regulation of alpha-beta T cell proliferation	5/69	37/18800	2.28689e-07	2.33003e-06	1.09569e-06	CD3E/CD28/IRF1/CD274/PTPRC	5
BP	GO:2000379	positive regulation of reactive oxygen species metabolic process	6/69	71/18800	2.32424e-07	2.35968e-06	1.10963e-06	TGFB1/TP53/ITGAM/ITGB2/TYROBP/THBS1	6
BP	GO:0051897	positive regulation of protein kinase B signaling	7/69	119/18800	2.65765e-07	2.66977e-06	1.25545e-06	CD28/TGFB1/IGFBP5/TNF/THBS1/PTK2/P2RX4	7
BP	GO:0051928	positive regulation of calcium ion transport	7/69	119/18800	2.65765e-07	2.66977e-06	1.25545e-06	CXCL12/CD19/CCL2/CCL5/CXCL10/LGALS3/P2RX4	7
BP	GO:0072676	lymphocyte migration	7/69	119/18800	2.65765e-07	2.66977e-06	1.25545e-06	TBX21/CXCL12/CCL2/CCL5/ICAM1/CXCL10/AIF1	7
BP	GO:0023035	CD40 signaling pathway	4/69	16/18800	2.92498e-07	2.92805e-06	1.37691e-06	TNFAIP3/CD40LG/CD40/CD86	4
BP	GO:0002833	positive regulation of response to biotic stimulus	8/69	180/18800	3.07108e-07	3.06359e-06	1.44064e-06	CD274/IRF7/FYN/HCK/SPI1/CCL5/TYROBP/EMILIN1	8
BP	GO:0016032	viral process	11/69	418/18800	3.29677e-07	3.27731e-06	1.54114e-06	CD28/CXCL8/IRF7/TP53/CD74/CD86/MRC1/CCL2/CCL5/ICAM1/TNF	11
BP	GO:0022612	gland morphogenesis	7/69	123/18800	3.33095e-07	3.28746e-06	1.54592e-06	STAT6/TNFAIP3/TGFB1/IGFBP5/CSF1/TNF/MDK	7
BP	GO:0032640	tumor necrosis factor production	8/69	182/18800	3.34143e-07	3.28746e-06	1.54592e-06	TNFAIP3/CD14/TLR9/PTPRC/PTPN6/TYROBP/CD2/THBS1	8
BP	GO:0032680	regulation of tumor necrosis factor production	8/69	182/18800	3.34143e-07	3.28746e-06	1.54592e-06	TNFAIP3/CD14/TLR9/PTPRC/PTPN6/TYROBP/CD2/THBS1	8
BP	GO:0046633	alpha-beta T cell proliferation	5/69	40/18800	3.42291e-07	3.35609e-06	1.57819e-06	CD3E/CD28/IRF1/CD274/PTPRC	5
BP	GO:0001906	cell killing	8/69	185/18800	3.7851e-07	3.69855e-06	1.73923e-06	IL7R/PTPRC/PTPN6/SPI1/ICAM1/ITGAM/HLA-DRA/TYROBP	8
BP	GO:0002544	chronic inflammatory response	4/69	17/18800	3.8144e-07	3.7145e-06	1.74673e-06	TNFAIP3/CCL5/TNF/THBS1	4
BP	GO:0032733	positive regulation of interleukin-10 production	5/69	41/18800	3.88727e-07	3.77263e-06	1.77406e-06	CD28/CD83/CD274/CD40LG/TLR9	5
BP	GO:0032102	negative regulation of response to external stimulus	11/69	429/18800	4.26559e-07	4.11192e-06	1.93361e-06	IL2RA/TNFAIP3/TNFRSF1B/FYN/CCL2/PTPRC/HCK/TNF/AIF1/THBS1/MDK	11
BP	GO:0042060	wound healing	11/69	429/18800	4.26559e-07	4.11192e-06	1.93361e-06	CD44/TNFAIP3/TGFB1/CD40LG/CD40/LCK/PTPN6/FCER1G/TNF/THBS1/PTK2	11
BP	GO:0014911	positive regulation of smooth muscle cell migration	5/69	42/18800	4.40007e-07	4.20708e-06	1.97836e-06	MYC/IGFBP5/CCL5/AIF1/MDK	5
BP	GO:0030890	positive regulation of B cell proliferation	5/69	42/18800	4.40007e-07	4.20708e-06	1.97836e-06	TLR9/CD40/CD74/TNFSF13B/PTPRC	5
BP	GO:0014068	positive regulation of phosphatidylinositol 3-kinase signaling	6/69	79/18800	4.40839e-07	4.20708e-06	1.97836e-06	CD28/KIT/PTPN6/CCL5/TNF/PTK2	6
BP	GO:0051054	positive regulation of DNA metabolic process	9/69	263/18800	4.87648e-07	4.63643e-06	2.18026e-06	TBX21/STAT6/CD28/MYC/TGFB1/CD40/PTPRC/TNF/MAPK1	9
BP	GO:0030889	negative regulation of B cell proliferation	4/69	18/18800	4.89068e-07	4.63643e-06	2.18026e-06	CTLA4/BTK/INPP5D/TYROBP	4
BP	GO:0045765	regulation of angiogenesis	10/69	345/18800	4.94839e-07	4.67566e-06	2.19871e-06	TNFAIP3/CXCL8/CD40/IL1B/CXCL10/TNF/C3AR1/THBS1/EMILIN1/MDK	10
BP	GO:0000018	regulation of DNA recombination	7/69	131/18800	5.11419e-07	4.81642e-06	2.2649e-06	TBX21/STAT6/CD28/IL7R/TGFB1/CD40/PTPRC	7
BP	GO:1901342	regulation of vasculature development	10/69	351/18800	5.79195e-07	5.43683e-06	2.55665e-06	TNFAIP3/CXCL8/CD40/IL1B/CXCL10/TNF/C3AR1/THBS1/EMILIN1/MDK	10
BP	GO:0032930	positive regulation of superoxide anion generation	4/69	19/18800	6.17774e-07	5.78002e-06	2.71803e-06	TGFB1/ITGAM/ITGB2/TYROBP	4
BP	GO:0002861	regulation of inflammatory response to antigenic stimulus	5/69	45/18800	6.26596e-07	5.80565e-06	2.73009e-06	CD28/FYN/HCK/BTK/TNF	5
BP	GO:1902622	regulation of neutrophil migration	5/69	45/18800	6.26596e-07	5.80565e-06	2.73009e-06	CXCL8/CD74/RAC2/C3AR1/MDK	5
BP	GO:1902895	positive regulation of pri-miRNA transcription by RNA polymerase II	5/69	45/18800	6.26596e-07	5.80565e-06	2.73009e-06	MYC/TGFB1/TP53/SPI1/TNF	5
BP	GO:0043270	positive regulation of ion transport	9/69	273/18800	6.66254e-07	6.15317e-06	2.89351e-06	CXCL12/CD19/IL1B/CCL2/CTSS/CCL5/CXCL10/LGALS3/P2RX4	9
BP	GO:0008625	extrinsic apoptotic signaling pathway via death domain receptors	6/69	85/18800	6.81769e-07	6.27622e-06	2.95137e-06	TNFAIP3/SPI1/ICAM1/TNF/LGALS3/THBS1	6
BP	GO:0045581	negative regulation of T cell differentiation	5/69	46/18800	7.01018e-07	6.43274e-06	3.02498e-06	TBX21/IRF1/CTLA4/CD74/MDK	5
BP	GO:0051090	regulation of DNA-binding transcription factor activity	11/69	452/18800	7.14026e-07	6.53117e-06	3.07126e-06	TNFAIP3/CD40LG/TLR9/CD40/KIT/IL1B/HCK/BTK/SPI1/NFKBIA/TNF	11
BP	GO:0090026	positive regulation of monocyte chemotaxis	4/69	20/18800	7.70083e-07	7.02149e-06	3.30183e-06	CXCL12/CCL5/CXCL10/AIF1	4
BP	GO:0006874	cellular calcium ion homeostasis	11/69	456/18800	7.78562e-07	7.07626e-06	3.32759e-06	CXCL12/CD40/CD19/LCK/FYN/PTPRC/PTPN6/CCL5/CXCL10/C3AR1/P2RX4	11
BP	GO:1901216	positive regulation of neuron death	6/69	87/18800	7.82679e-07	7.09117e-06	3.3346e-06	TP53/FYN/ITGAM/ITGB2/TYROBP/TNF	6
BP	GO:0031589	cell-substrate adhesion	10/69	364/18800	8.06352e-07	7.28261e-06	3.42462e-06	CD3E/CD44/CSF1/RAC2/ITGAM/ITGB2/THBS1/EMILIN1/PTK2/MDK	10
BP	GO:0002709	regulation of T cell mediated immunity	6/69	88/18800	8.37538e-07	7.54047e-06	3.54588e-06	TBX21/IL7R/TNFRSF1B/IL1B/PTPRC/HLA-DRA	6
BP	GO:0038061	NIK/NF-kappaB signaling	7/69	141/18800	8.41315e-07	7.55073e-06	3.55071e-06	CD14/TLR9/CD86/IL1B/SPI1/NFKBIA/TNF	7
BP	GO:0048872	homeostasis of number of cells	9/69	282/18800	8.72939e-07	7.81007e-06	3.67266e-06	IL2RA/TNFAIP3/IL7R/KIT/CD74/TNFSF13B/CSF1/SPI1/INPP5D	9
BP	GO:1904894	positive regulation of STAT cascade	5/69	49/18800	9.66936e-07	8.6241e-06	4.05545e-06	IL7R/TGFB1/KIT/CCL5/TNF	5
BP	GO:0055074	calcium ion homeostasis	11/69	468/18800	1.00415e-06	8.92821e-06	4.19846e-06	CXCL12/CD40/CD19/LCK/FYN/PTPRC/PTPN6/CCL5/CXCL10/C3AR1/P2RX4	11
BP	GO:0050729	positive regulation of inflammatory response	7/69	145/18800	1.01583e-06	9.00406e-06	4.23413e-06	CD28/TLR9/IL1B/BTK/NFKBIA/TNF/MDK	7
BP	GO:0007249	I-kappaB kinase/NF-kappaB signaling	9/69	288/18800	1.03973e-06	9.18745e-06	4.32037e-06	TNFAIP3/TLR9/CD40/CD74/FYN/IL1B/BTK/NFKBIA/TNF	9
BP	GO:2000107	negative regulation of leukocyte apoptotic process	5/69	50/18800	1.07133e-06	9.43759e-06	4.43799e-06	IL7R/IRF7/CXCL12/CD74/CCL5	5
BP	GO:0032928	regulation of superoxide anion generation	4/69	22/18800	1.15626e-06	1.01545e-05	4.77512e-06	TGFB1/ITGAM/ITGB2/TYROBP	4
BP	GO:0050982	detection of mechanical stimulus	5/69	51/18800	1.18441e-06	1.037e-05	4.87644e-06	CXCL12/KIT/FYN/TNF/PTK2	5
BP	GO:0008360	regulation of cell shape	7/69	151/18800	1.33391e-06	1.16432e-05	5.47518e-06	KIT/FYN/RAC2/CCL2/HCK/ITGB2/PTK2	7
BP	GO:0010720	positive regulation of cell development	9/69	297/18800	1.34143e-06	1.16733e-05	5.48935e-06	TNFRSF1B/MYC/TGFB1/CXCL12/KIT/IL1B/TYROBP/TNF/MDK	9
BP	GO:0070374	positive regulation of ERK1 and ERK2 cascade	8/69	220/18800	1.40219e-06	1.21651e-05	5.72058e-06	CD44/TGFB1/CD74/CCL2/PTPRC/CCL5/ICAM1/TNF	8
BP	GO:0045834	positive regulation of lipid metabolic process	7/69	153/18800	1.4569e-06	1.25635e-05	5.90796e-06	TGFB1/CD19/KIT/CD74/IL1B/TNF/PTK2	7
BP	GO:2001236	regulation of extrinsic apoptotic signaling pathway	7/69	153/18800	1.4569e-06	1.25635e-05	5.90796e-06	TNFAIP3/IL1B/PTPRC/ICAM1/TNF/LGALS3/THBS1	7
BP	GO:0032755	positive regulation of interleukin-6 production	6/69	97/18800	1.4882e-06	1.27566e-05	5.99876e-06	TLR9/CD74/IL1B/TYROBP/TNF/AIF1	6
BP	GO:2001237	negative regulation of extrinsic apoptotic signaling pathway	6/69	97/18800	1.4882e-06	1.27566e-05	5.99876e-06	TNFAIP3/IL1B/ICAM1/TNF/LGALS3/THBS1	6
BP	GO:0050769	positive regulation of neurogenesis	8/69	222/18800	1.50053e-06	1.28239e-05	6.0304e-06	TNFRSF1B/MYC/TGFB1/CXCL12/KIT/IL1B/TNF/MDK	8
BP	GO:0002755	MyD88-dependent toll-like receptor signaling pathway	4/69	24/18800	1.67035e-06	1.41286e-05	6.64391e-06	IRF1/IRF7/TLR9/BTK	4
BP	GO:2000353	positive regulation of endothelial cell apoptotic process	4/69	24/18800	1.67035e-06	1.41286e-05	6.64391e-06	CD40LG/CD40/CCL2/THBS1	4
BP	GO:0022604	regulation of cell morphogenesis	9/69	305/18800	1.6704e-06	1.41286e-05	6.64391e-06	CD44/KIT/FYN/RAC2/CCL2/HCK/ITGB2/PTK2/MDK	9
BP	GO:0045639	positive regulation of myeloid cell differentiation	6/69	99/18800	1.67786e-06	1.41286e-05	6.64391e-06	TGFB1/CD74/CSF1/INPP5D/TYROBP/TNF	6
BP	GO:0050764	regulation of phagocytosis	6/69	99/18800	1.67786e-06	1.41286e-05	6.64391e-06	IL1B/CCL2/PTPRC/HCK/FCER1G/TNF	6
BP	GO:0072503	cellular divalent inorganic cation homeostasis	11/69	494/18800	1.69986e-06	1.42718e-05	6.71127e-06	CXCL12/CD40/CD19/LCK/FYN/PTPRC/PTPN6/CCL5/CXCL10/C3AR1/P2RX4	11
BP	GO:0002763	positive regulation of myeloid leukocyte differentiation	5/69	55/18800	1.73423e-06	1.44755e-05	6.80705e-06	TGFB1/CD74/CSF1/TYROBP/TNF	5
BP	GO:0045620	negative regulation of lymphocyte differentiation	5/69	55/18800	1.73423e-06	1.44755e-05	6.80705e-06	TBX21/IRF1/CTLA4/CD74/MDK	5
BP	GO:0014013	regulation of gliogenesis	6/69	100/18800	1.77984e-06	1.4813e-05	6.96576e-06	TNFRSF1B/MYC/TGFB1/IL1B/TNF/MDK	6
BP	GO:0008630	intrinsic apoptotic signaling pathway in response to DNA damage	6/69	101/18800	1.88682e-06	1.56579e-05	7.36305e-06	CD44/TNFRSF1B/CXCL12/TP53/CD74/TNF	6
BP	GO:0034114	regulation of heterotypic cell-cell adhesion	4/69	25/18800	1.98302e-06	1.64086e-05	7.71609e-06	CD44/LCK/IL1B/TNF	4
BP	GO:0035710	CD4-positive, alpha-beta T cell activation	6/69	102/18800	1.99899e-06	1.64931e-05	7.75584e-06	TBX21/STAT6/CD83/CD274/CD86/HLA-DRA	6
BP	GO:0010959	regulation of metal ion transport	10/69	403/18800	2.01845e-06	1.66058e-05	7.80884e-06	CXCL12/TLR9/CD19/FYN/CCL2/PTPN6/CCL5/CXCL10/LGALS3/P2RX4	10
BP	GO:0032760	positive regulation of tumor necrosis factor production	6/69	103/18800	2.11655e-06	1.7363e-05	8.16489e-06	CD14/TLR9/PTPRC/TYROBP/CD2/THBS1	6
BP	GO:0033002	muscle cell proliferation	8/69	233/18800	2.15318e-06	1.7613e-05	8.28244e-06	TNFAIP3/MYC/TGFB1/IGFBP5/CCL5/TNF/AIF1/THBS1	8
BP	GO:0001912	positive regulation of leukocyte mediated cytotoxicity	5/69	58/18800	2.26492e-06	1.84742e-05	8.68744e-06	PTPRC/SPI1/ITGAM/HLA-DRA/TYROBP	5
BP	GO:0019058	viral life cycle	9/69	317/18800	2.29381e-06	1.86106e-05	8.75158e-06	CD28/CXCL8/CD74/CD86/MRC1/CCL2/CCL5/ICAM1/TNF	9
BP	GO:0007160	cell-matrix adhesion	8/69	235/18800	2.29464e-06	1.86106e-05	8.75158e-06	CD3E/CD44/CSF1/ITGAM/ITGB2/THBS1/EMILIN1/PTK2	8
BP	GO:0002433	immune response-regulating cell surface receptor signaling pathway involved in phagocytosis	4/69	26/18800	2.33709e-06	1.88481e-05	8.86327e-06	FYN/PTPRC/HCK/PTK2	4
BP	GO:0038096	Fc-gamma receptor signaling pathway involved in phagocytosis	4/69	26/18800	2.33709e-06	1.88481e-05	8.86327e-06	FYN/PTPRC/HCK/PTK2	4
BP	GO:1902893	regulation of pri-miRNA transcription by RNA polymerase II	5/69	59/18800	2.46762e-06	1.9845e-05	9.33202e-06	MYC/TGFB1/TP53/SPI1/TNF	5
BP	GO:0001959	regulation of cytokine-mediated signaling pathway	7/69	166/18800	2.51088e-06	2.01362e-05	9.469e-06	TNFAIP3/IRF7/CD74/CSF1/PTPRC/PTPN6/CCL5	7
BP	GO:0033209	tumor necrosis factor-mediated signaling pathway	6/69	107/18800	2.64465e-06	2.11498e-05	9.94562e-06	TNFAIP3/TNFRSF1B/TP53/TNFSF13B/NFKBIA/TNF	6
BP	GO:0061614	pri-miRNA transcription by RNA polymerase II	5/69	60/18800	2.68433e-06	2.14073e-05	1.00667e-05	MYC/TGFB1/TP53/SPI1/TNF	5
BP	GO:0060402	calcium ion transport into cytosol	7/69	171/18800	3.05784e-06	2.43183e-05	1.14356e-05	CD19/LCK/FYN/PTPRC/PTPN6/CXCL10/P2RX4	7
BP	GO:0090025	regulation of monocyte chemotaxis	4/69	28/18800	3.18314e-06	2.52447e-05	1.18712e-05	CXCL12/CCL5/CXCL10/AIF1	4
BP	GO:0014066	regulation of phosphatidylinositol 3-kinase signaling	6/69	111/18800	3.27554e-06	2.57634e-05	1.21151e-05	CD28/KIT/PTPN6/CCL5/TNF/PTK2	6
BP	GO:0046632	alpha-beta T cell differentiation	6/69	111/18800	3.27554e-06	2.57634e-05	1.21151e-05	TBX21/STAT6/IRF1/CD83/CD86/HLA-DRA	6
BP	GO:0071347	cellular response to interleukin-1	6/69	111/18800	3.27554e-06	2.57634e-05	1.21151e-05	CXCL8/MYC/CD40/IL1B/CCL2/CCL5	6
BP	GO:0062197	NA	9/69	332/18800	3.34726e-06	2.62553e-05	1.23465e-05	STAT6/TNFAIP3/MYC/TP53/FYN/BTK/TNF/AIF1/MAPK1	9
BP	GO:2000401	regulation of lymphocyte migration	5/69	63/18800	3.42541e-06	2.67949e-05	1.26002e-05	CXCL12/CCL2/CCL5/CXCL10/AIF1	5
BP	GO:0044344	cellular response to fibroblast growth factor stimulus	6/69	113/18800	3.63408e-06	2.83498e-05	1.33314e-05	CD44/CXCL8/MYC/CCL2/CCL5/THBS1	6
BP	GO:0050918	positive chemotaxis	5/69	64/18800	3.70518e-06	2.88259e-05	1.35553e-05	CXCL8/CXCL12/CCL5/CXCL10/LGALS3	5
BP	GO:0060759	regulation of response to cytokine stimulus	7/69	178/18800	3.98792e-06	3.09415e-05	1.45501e-05	TNFAIP3/IRF7/CD74/CSF1/PTPRC/PTPN6/CCL5	7
BP	GO:0031343	positive regulation of cell killing	5/69	65/18800	4.00258e-06	3.09713e-05	1.45641e-05	PTPRC/SPI1/ITGAM/HLA-DRA/TYROBP	5
BP	GO:1904892	regulation of STAT cascade	6/69	116/18800	4.23126e-06	3.26091e-05	1.53343e-05	IL7R/TGFB1/KIT/PTPRC/CCL5/TNF	6
BP	GO:0019886	antigen processing and presentation of exogenous peptide antigen via MHC class II	4/69	30/18800	4.23701e-06	3.26091e-05	1.53343e-05	CD74/CTSS/FCER1G/HLA-DRA	4
BP	GO:0050854	regulation of antigen receptor-mediated signaling pathway	5/69	66/18800	4.31839e-06	3.30577e-05	1.55452e-05	CD19/LCK/PTPRC/PTPN6/LGALS3	5
BP	GO:2000514	regulation of CD4-positive, alpha-beta T cell activation	5/69	66/18800	4.31839e-06	3.30577e-05	1.55452e-05	TBX21/CD83/CD274/CD86/HLA-DRA	5
BP	GO:0050728	negative regulation of inflammatory response	7/69	182/18800	4.61784e-06	3.52455e-05	1.65741e-05	IL2RA/TNFAIP3/TNFRSF1B/FYN/PTPRC/HCK/MDK	7
BP	GO:0002704	negative regulation of leukocyte mediated immunity	5/69	67/18800	4.65344e-06	3.52455e-05	1.65741e-05	TBX21/IL7R/PTPRC/PTPN6/SPI1	5
BP	GO:0042531	positive regulation of tyrosine phosphorylation of STAT protein	5/69	67/18800	4.65344e-06	3.52455e-05	1.65741e-05	CD40/KIT/FYN/CCL5/TNF	5
BP	GO:1901224	positive regulation of NIK/NF-kappaB signaling	5/69	67/18800	4.65344e-06	3.52455e-05	1.65741e-05	CD14/TLR9/CD86/IL1B/TNF	5
BP	GO:0030336	negative regulation of cell migration	9/69	346/18800	4.68249e-06	3.53719e-05	1.66335e-05	TGFB1/CXCL12/IGFBP5/CD74/CCL2/TNF/AIF1/THBS1/EMILIN1	9
BP	GO:0002507	tolerance induction	4/69	31/18800	4.85129e-06	3.63592e-05	1.70978e-05	CD3E/IL2RA/TNFAIP3/CD274	4
BP	GO:0045577	regulation of B cell differentiation	4/69	31/18800	4.85129e-06	3.63592e-05	1.70978e-05	TLR9/BTK/PTPN6/INPP5D	4
BP	GO:2000406	positive regulation of T cell migration	4/69	31/18800	4.85129e-06	3.63592e-05	1.70978e-05	CXCL12/CCL5/CXCL10/AIF1	4
BP	GO:0071774	response to fibroblast growth factor	6/69	119/18800	4.90595e-06	3.6673e-05	1.72453e-05	CD44/CXCL8/MYC/CCL2/CCL5/THBS1	6
BP	GO:0042130	negative regulation of T cell proliferation	5/69	68/18800	5.00854e-06	3.73423e-05	1.75601e-05	IL2RA/CD274/CTLA4/CD86/PTPN6	5
BP	GO:0032715	negative regulation of interleukin-6 production	5/69	69/18800	5.38455e-06	4.00415e-05	1.88294e-05	TNFAIP3/TLR9/PTPN6/INPP5D/TNF	5
BP	GO:0051896	regulation of protein kinase B signaling	7/69	187/18800	5.51984e-06	4.07979e-05	1.91851e-05	CD28/TGFB1/IGFBP5/TNF/THBS1/PTK2/P2RX4	7
BP	GO:0002828	regulation of type 2 immune response	4/69	32/18800	5.52902e-06	4.07979e-05	1.91851e-05	TBX21/STAT6/CD74/CD86	4
BP	GO:1902253	regulation of intrinsic apoptotic signaling pathway by p53 class mediator	4/69	32/18800	5.52902e-06	4.07979e-05	1.91851e-05	CD44/MYC/TP53/CD74	4
BP	GO:0002676	regulation of chronic inflammatory response	3/69	10/18800	5.57438e-06	4.09217e-05	1.92433e-05	TNFAIP3/CCL5/TNF	3
BP	GO:2000347	positive regulation of hepatocyte proliferation	3/69	10/18800	5.57438e-06	4.09217e-05	1.92433e-05	TNFAIP3/TNF/MDK	3
BP	GO:0032722	positive regulation of chemokine production	5/69	70/18800	5.78233e-06	4.23397e-05	1.99101e-05	TLR9/CD74/IL1B/TNF/AIF1	5
BP	GO:0002244	hematopoietic progenitor cell differentiation	6/69	123/18800	5.93908e-06	4.33765e-05	2.03976e-05	TGFB1/TP53/KIT/PTPRC/PTPN6/SPI1	6
BP	GO:0060401	cytosolic calcium ion transport	7/69	190/18800	6.12821e-06	4.46439e-05	2.09936e-05	CD19/LCK/FYN/PTPRC/PTPN6/CXCL10/P2RX4	7
BP	GO:0050766	positive regulation of phagocytosis	5/69	71/18800	6.20278e-06	4.50725e-05	2.11952e-05	IL1B/CCL2/PTPRC/FCER1G/TNF	5
BP	GO:0043552	positive regulation of phosphatidylinositol 3-kinase activity	4/69	33/18800	6.27427e-06	4.53617e-05	2.13312e-05	TGFB1/CD19/KIT/PTK2	4
BP	GO:0050974	detection of mechanical stimulus involved in sensory perception	4/69	33/18800	6.27427e-06	4.53617e-05	2.13312e-05	CXCL12/KIT/FYN/TNF	4
BP	GO:0051962	positive regulation of nervous system development	8/69	270/18800	6.39599e-06	4.61252e-05	2.16902e-05	TNFRSF1B/MYC/TGFB1/CXCL12/KIT/IL1B/TNF/MDK	8
BP	GO:0050767	regulation of neurogenesis	9/69	361/18800	6.59799e-06	4.72251e-05	2.22075e-05	TNFRSF1B/MYC/TGFB1/CXCL12/TP53/KIT/IL1B/TNF/MDK	9
BP	GO:1901653	cellular response to peptide	9/69	361/18800	6.59799e-06	4.72251e-05	2.22075e-05	STAT6/MYC/TP53/FYN/IL1B/ICAM1/TNF/RARRES2/PTK2	9
BP	GO:2000146	negative regulation of cell motility	9/69	361/18800	6.59799e-06	4.72251e-05	2.22075e-05	TGFB1/CXCL12/IGFBP5/CD74/CCL2/TNF/AIF1/THBS1/EMILIN1	9
BP	GO:0002495	antigen processing and presentation of peptide antigen via MHC class II	4/69	34/18800	7.09121e-06	5.05028e-05	2.37488e-05	CD74/CTSS/FCER1G/HLA-DRA	4
BP	GO:0090322	regulation of superoxide metabolic process	4/69	34/18800	7.09121e-06	5.05028e-05	2.37488e-05	TGFB1/ITGAM/ITGB2/TYROBP	4
BP	GO:0045123	cellular extravasation	5/69	73/18800	7.11534e-06	5.05489e-05	2.37705e-05	CXCL12/CCL2/ICAM1/TNF/MDK	5
BP	GO:0002604	regulation of dendritic cell antigen processing and presentation	3/69	11/18800	7.64461e-06	5.40408e-05	2.54125e-05	CD74/CD68/THBS1	3
BP	GO:1903799	negative regulation of production of miRNAs involved in gene silencing by miRNA	3/69	11/18800	7.64461e-06	5.40408e-05	2.54125e-05	TGFB1/TP53/TNF	3
BP	GO:0051271	negative regulation of cellular component movement	9/69	369/18800	7.87013e-06	5.5498e-05	2.60977e-05	TGFB1/CXCL12/IGFBP5/CD74/CCL2/TNF/AIF1/THBS1/EMILIN1	9
BP	GO:0002292	T cell differentiation involved in immune response	5/69	76/18800	8.67769e-06	6.10423e-05	2.87049e-05	TBX21/STAT6/CD86/FCER1G/HLA-DRA	5
BP	GO:0034599	cellular response to oxidative stress	8/69	284/18800	9.25116e-06	6.49168e-05	3.05269e-05	STAT6/TNFAIP3/TP53/FYN/BTK/TNF/AIF1/MAPK1	8
BP	GO:2001235	positive regulation of apoptotic signaling pathway	6/69	134/18800	9.72018e-06	6.80413e-05	3.19962e-05	MYC/TP53/LCK/PTPRC/TNF/THBS1	6
BP	GO:0042092	type 2 immune response	4/69	37/18800	1.00153e-05	6.95969e-05	3.27277e-05	TBX21/STAT6/CD74/CD86	4
BP	GO:0090218	positive regulation of lipid kinase activity	4/69	37/18800	1.00153e-05	6.95969e-05	3.27277e-05	TGFB1/CD19/KIT/PTK2	4
BP	GO:2000403	positive regulation of lymphocyte migration	4/69	37/18800	1.00153e-05	6.95969e-05	3.27277e-05	CXCL12/CCL5/CXCL10/AIF1	4
BP	GO:0002863	positive regulation of inflammatory response to antigenic stimulus	3/69	12/18800	1.0166e-05	7.01332e-05	3.29799e-05	CD28/BTK/TNF	3
BP	GO:0043312	neutrophil degranulation	3/69	12/18800	1.0166e-05	7.01332e-05	3.29799e-05	SPI1/ITGAM/ITGB2	3
BP	GO:0061517	macrophage proliferation	3/69	12/18800	1.0166e-05	7.01332e-05	3.29799e-05	CSF1/MAPK1/PTK2	3
BP	GO:0051607	defense response to virus	8/69	290/18800	1.07693e-05	7.41166e-05	3.48531e-05	TNFAIP3/IRF1/IRF7/TLR9/CD40/IL1B/PTPRC/CXCL10	8
BP	GO:0140546	NA	8/69	291/18800	1.10417e-05	7.58091e-05	3.5649e-05	TNFAIP3/IRF1/IRF7/TLR9/CD40/IL1B/PTPRC/CXCL10	8
BP	GO:0002478	antigen processing and presentation of exogenous peptide antigen	4/69	38/18800	1.11627e-05	7.60925e-05	3.57822e-05	CD74/CTSS/FCER1G/HLA-DRA	4
BP	GO:0060416	response to growth hormone	4/69	38/18800	1.11627e-05	7.60925e-05	3.57822e-05	STAT6/MYC/IGFBP5/PTK2	4
BP	GO:1904037	positive regulation of epithelial cell apoptotic process	4/69	38/18800	1.11627e-05	7.60925e-05	3.57822e-05	CD40LG/CD40/CCL2/THBS1	4
BP	GO:0097193	intrinsic apoptotic signaling pathway	8/69	295/18800	1.21903e-05	8.28996e-05	3.89833e-05	CD44/TNFRSF1B/MYC/CXCL12/TP53/CD74/LCK/TNF	8
BP	GO:1904994	regulation of leukocyte adhesion to vascular endothelial cell	4/69	39/18800	1.24041e-05	8.41541e-05	3.95732e-05	CXCL12/ITGB2/TNF/MDK	4
BP	GO:0045089	positive regulation of innate immune response	6/69	140/18800	1.24874e-05	8.45189e-05	3.97447e-05	IRF7/FYN/HCK/SPI1/CCL5/TYROBP	6
BP	GO:0043367	CD4-positive, alpha-beta T cell differentiation	5/69	82/18800	1.25999e-05	8.50794e-05	4.00083e-05	TBX21/STAT6/CD83/CD86/HLA-DRA	5
BP	GO:0070555	response to interleukin-1	6/69	141/18800	1.3005e-05	8.7608e-05	4.11974e-05	CXCL8/MYC/CD40/IL1B/CCL2/CCL5	6
BP	GO:0070234	positive regulation of T cell apoptotic process	3/69	13/18800	1.3181e-05	8.81713e-05	4.14623e-05	CD274/TP53/CCL5	3
BP	GO:0070486	leukocyte aggregation	3/69	13/18800	1.3181e-05	8.81713e-05	4.14623e-05	CD44/RAC2/IL1B	3
BP	GO:1903054	negative regulation of extracellular matrix organization	3/69	13/18800	1.3181e-05	8.81713e-05	4.14623e-05	TNFRSF1B/TGFB1/EMILIN1	3
BP	GO:0014910	regulation of smooth muscle cell migration	5/69	83/18800	1.33697e-05	8.90173e-05	4.18601e-05	MYC/IGFBP5/CCL5/AIF1/MDK	5
BP	GO:0042509	regulation of tyrosine phosphorylation of STAT protein	5/69	83/18800	1.33697e-05	8.90173e-05	4.18601e-05	CD40/KIT/FYN/CCL5/TNF	5
BP	GO:0060284	regulation of cell development	10/69	500/18800	1.34776e-05	8.95278e-05	4.21001e-05	TNFRSF1B/MYC/TGFB1/CXCL12/TP53/KIT/IL1B/TYROBP/TNF/MDK	10
BP	GO:0040013	negative regulation of locomotion	9/69	396/18800	1.38352e-05	9.16903e-05	4.3117e-05	TGFB1/CXCL12/IGFBP5/CD74/CCL2/TNF/AIF1/THBS1/EMILIN1	9
BP	GO:0010810	regulation of cell-substrate adhesion	7/69	217/18800	1.45711e-05	9.63444e-05	4.53056e-05	CD3E/CSF1/RAC2/THBS1/EMILIN1/PTK2/MDK	7
BP	GO:0014065	phosphatidylinositol 3-kinase signaling	6/69	144/18800	1.46629e-05	9.67277e-05	4.54859e-05	CD28/KIT/PTPN6/CCL5/TNF/PTK2	6
BP	GO:0045429	positive regulation of nitric oxide biosynthetic process	4/69	41/18800	1.51882e-05	9.97334e-05	4.68993e-05	IL1B/TNF/AIF1/P2RX4	4
BP	GO:0150077	regulation of neuroinflammatory response	4/69	41/18800	1.51882e-05	9.97334e-05	4.68993e-05	TNFRSF1B/IL1B/PTPRC/TNF	4
BP	GO:0034103	regulation of tissue remodeling	5/69	86/18800	1.5901e-05	0.000104175	4.89881e-05	TNFAIP3/TGFB1/TP53/INPP5D/MDK	5
BP	GO:0050966	detection of mechanical stimulus involved in sensory perception of pain	3/69	14/18800	1.67318e-05	0.000109368	5.14297e-05	CXCL12/FYN/TNF	3
BP	GO:0007260	tyrosine phosphorylation of STAT protein	5/69	87/18800	1.68229e-05	0.000109713	5.1592e-05	CD40/KIT/FYN/CCL5/TNF	5
BP	GO:0071496	cellular response to external stimulus	8/69	309/18800	1.7037e-05	0.000110856	5.21299e-05	IRF1/TP53/CD40/IL1B/CD68/PTPRC/AIF1/MAPK1	8
BP	GO:0042554	superoxide anion generation	4/69	43/18800	1.84067e-05	0.000119227	5.60661e-05	TGFB1/ITGAM/ITGB2/TYROBP	4
BP	GO:1904407	positive regulation of nitric oxide metabolic process	4/69	43/18800	1.84067e-05	0.000119227	5.60661e-05	IL1B/TNF/AIF1/P2RX4	4
BP	GO:0070098	chemokine-mediated signaling pathway	5/69	89/18800	1.87912e-05	0.000121443	5.71082e-05	CXCL8/CXCL12/CCL2/CCL5/CXCL10	5
BP	GO:0070588	calcium ion transmembrane transport	8/69	314/18800	1.91209e-05	0.000123295	5.79792e-05	TLR9/CD19/LCK/FYN/PTPRC/PTPN6/CXCL10/P2RX4	8
BP	GO:0014009	glial cell proliferation	4/69	44/18800	2.01915e-05	0.000129615	6.0951e-05	MYC/CSF1/IL1B/TNF	4
BP	GO:2000404	regulation of T cell migration	4/69	44/18800	2.01915e-05	0.000129615	6.0951e-05	CXCL12/CCL5/CXCL10/AIF1	4
BP	GO:0010763	positive regulation of fibroblast migration	3/69	15/18800	2.08597e-05	0.000133306	6.26869e-05	TGFB1/THBS1/PTK2	3
BP	GO:2000345	regulation of hepatocyte proliferation	3/69	15/18800	2.08597e-05	0.000133306	6.26869e-05	TNFAIP3/TNF/MDK	3
BP	GO:0014909	smooth muscle cell migration	5/69	91/18800	2.09344e-05	0.000133486	6.27714e-05	MYC/IGFBP5/CCL5/AIF1/MDK	5
BP	GO:0051092	positive regulation of NF-kappaB transcription factor activity	6/69	154/18800	2.14642e-05	0.000136257	6.40744e-05	CD40LG/TLR9/CD40/IL1B/BTK/TNF	6
BP	GO:0097553	calcium ion transmembrane import into cytosol	6/69	154/18800	2.14642e-05	0.000136257	6.40744e-05	CD19/LCK/FYN/PTPRC/PTPN6/CXCL10	6
BP	GO:0002920	regulation of humoral immune response	4/69	45/18800	2.21003e-05	0.000139676	6.5682e-05	IL1B/PTPRC/PTPN6/TNF	4
BP	GO:0046427	positive regulation of JAK-STAT cascade	4/69	45/18800	2.21003e-05	0.000139676	6.5682e-05	IL7R/KIT/CCL5/TNF	4
BP	GO:0090316	positive regulation of intracellular protein transport	6/69	156/18800	2.30887e-05	0.000145601	6.84685e-05	TGFB1/FYN/RAC2/IL1B/ITGAM/ITGB2	6
BP	GO:0045055	regulated exocytosis	7/69	234/18800	2.369e-05	0.000149065	7.00973e-05	KIT/RAC2/HCK/BTK/SPI1/ITGAM/ITGB2	7
BP	GO:0006310	DNA recombination	8/69	324/18800	2.39367e-05	0.000150287	7.0672e-05	TBX21/STAT6/CD28/IL7R/TGFB1/CD40LG/CD40/PTPRC	8
BP	GO:0007204	positive regulation of cytosolic calcium ion concentration	8/69	325/18800	2.44698e-05	0.000153298	7.20878e-05	CD19/LCK/FYN/PTPRC/PTPN6/CXCL10/C3AR1/P2RX4	8
BP	GO:0051044	positive regulation of membrane protein ectodomain proteolysis	3/69	16/18800	2.5606e-05	0.000160065	7.52701e-05	TNFRSF1B/IL1B/TNF	3
BP	GO:0019884	antigen processing and presentation of exogenous antigen	4/69	47/18800	2.6311e-05	0.000163757	7.70062e-05	CD74/CTSS/FCER1G/HLA-DRA	4
BP	GO:0090279	regulation of calcium ion import	4/69	47/18800	2.6311e-05	0.000163757	7.70062e-05	CXCL12/FYN/CCL2/LGALS3	4
BP	GO:0048732	gland development	9/69	431/18800	2.69931e-05	0.000167638	7.88313e-05	STAT6/TNFAIP3/MYC/TGFB1/IGFBP5/CSF1/TNF/MAPK1/MDK	9
BP	GO:0051235	maintenance of location	8/69	331/18800	2.78823e-05	0.000172786	8.12518e-05	CD19/LCK/IL1B/PTPRC/PTPN6/CXCL10/NFKBIA/TNF	8
BP	GO:0032642	regulation of chemokine production	5/69	97/18800	2.85222e-05	0.000175611	8.25805e-05	TLR9/CD74/IL1B/TNF/AIF1	5
BP	GO:1990868	response to chemokine	5/69	97/18800	2.85222e-05	0.000175611	8.25805e-05	CXCL8/CXCL12/CCL2/CCL5/CXCL10	5
BP	GO:1990869	cellular response to chemokine	5/69	97/18800	2.85222e-05	0.000175611	8.25805e-05	CXCL8/CXCL12/CCL2/CCL5/CXCL10	5
BP	GO:0033628	regulation of cell adhesion mediated by integrin	4/69	48/18800	2.86237e-05	0.000175858	8.26964e-05	CD3E/PTPN6/CCL5/PTK2	4
BP	GO:0032479	regulation of type I interferon production	5/69	98/18800	2.99707e-05	0.000182955	8.60342e-05	IRF1/CD14/IRF7/IRF8/TLR9	5
BP	GO:0032602	chemokine production	5/69	98/18800	2.99707e-05	0.000182955	8.60342e-05	TLR9/CD74/IL1B/TNF/AIF1	5
BP	GO:0032606	type I interferon production	5/69	98/18800	2.99707e-05	0.000182955	8.60342e-05	IRF1/CD14/IRF7/IRF8/TLR9	5
BP	GO:0060252	positive regulation of glial cell proliferation	3/69	17/18800	3.10112e-05	0.000188503	8.86431e-05	MYC/IL1B/TNF	3
BP	GO:0070230	positive regulation of lymphocyte apoptotic process	3/69	17/18800	3.10112e-05	0.000188503	8.86431e-05	CD274/TP53/CCL5	3
BP	GO:0043300	regulation of leukocyte degranulation	4/69	49/18800	3.10821e-05	0.000188534	8.86574e-05	RAC2/SPI1/ITGAM/ITGB2	4
BP	GO:0019233	sensory perception of pain	5/69	99/18800	3.14756e-05	0.000190517	8.95902e-05	CXCL12/FYN/CCL2/TNF/P2RX4	5
BP	GO:0045936	negative regulation of phosphate metabolic process	9/69	440/18800	3.17293e-05	0.000191244	8.99318e-05	TNFAIP3/TGFB1/TP53/IL1B/PTPRC/PTPN6/TNF/LGALS3/EMILIN1	9
BP	GO:0051960	regulation of nervous system development	9/69	440/18800	3.17293e-05	0.000191244	8.99318e-05	TNFRSF1B/MYC/TGFB1/CXCL12/TP53/KIT/IL1B/TNF/MDK	9
BP	GO:0010563	negative regulation of phosphorus metabolic process	9/69	441/18800	3.22966e-05	0.000194254	9.13475e-05	TNFAIP3/TGFB1/TP53/IL1B/PTPRC/PTPN6/TNF/LGALS3/EMILIN1	9
BP	GO:0019216	regulation of lipid metabolic process	8/69	339/18800	3.30458e-05	0.000198344	9.32707e-05	TGFB1/CD19/KIT/CD74/IL1B/TNF/RARRES2/PTK2	8
BP	GO:0043370	regulation of CD4-positive, alpha-beta T cell differentiation	4/69	50/18800	3.36917e-05	0.000201377	9.46966e-05	TBX21/CD83/CD86/HLA-DRA	4
BP	GO:1902041	regulation of extrinsic apoptotic signaling pathway via death domain receptors	4/69	50/18800	3.36917e-05	0.000201377	9.46966e-05	TNFAIP3/ICAM1/LGALS3/THBS1	4
BP	GO:1903829	positive regulation of cellular protein localization	9/69	446/18800	3.52642e-05	0.000210337	9.891e-05	TGFB1/FYN/RAC2/IL1B/ITGAM/ITGB2/TYROBP/TNF/LGALS3	9
BP	GO:0043277	apoptotic cell clearance	4/69	51/18800	3.64583e-05	0.000217006	0.000102047	RAC2/CCL2/TYROBP/THBS1	4
BP	GO:0002923	regulation of humoral immune response mediated by circulating immunoglobulin	3/69	18/18800	3.71157e-05	0.000220004	0.000103456	PTPRC/PTPN6/TNF	3
BP	GO:0060965	negative regulation of gene silencing by miRNA	3/69	18/18800	3.71157e-05	0.000220004	0.000103456	TGFB1/TP53/TNF	3
BP	GO:0071560	cellular response to transforming growth factor beta stimulus	7/69	252/18800	3.80283e-05	0.000224392	0.00010552	TGFB1/TP53/FYN/SPI1/THBS1/EMILIN1/PTK2	7
BP	GO:0010522	regulation of calcium ion transport into cytosol	5/69	103/18800	3.8091e-05	0.000224392	0.00010552	CD19/FYN/PTPN6/CXCL10/P2RX4	5
BP	GO:1905477	positive regulation of protein localization to membrane	5/69	103/18800	3.8091e-05	0.000224392	0.00010552	FYN/ITGAM/ITGB2/TNF/LGALS3	5
BP	GO:2001242	regulation of intrinsic apoptotic signaling pathway	6/69	171/18800	3.86974e-05	0.000227496	0.000106979	CD44/MYC/CXCL12/TP53/CD74/LCK	6
BP	GO:0002279	mast cell activation involved in immune response	4/69	52/18800	3.93876e-05	0.000230607	0.000108442	KIT/RAC2/BTK/PTPN6	4
BP	GO:0043525	positive regulation of neuron apoptotic process	4/69	52/18800	3.93876e-05	0.000230607	0.000108442	TP53/ITGAM/TYROBP/TNF	4
BP	GO:0014812	muscle cell migration	5/69	104/18800	3.99017e-05	0.000232689	0.000109421	MYC/IGFBP5/CCL5/AIF1/MDK	5
BP	GO:1905475	regulation of protein localization to membrane	6/69	172/18800	3.99812e-05	0.000232689	0.000109421	TGFB1/FYN/ITGAM/ITGB2/TNF/LGALS3	6
BP	GO:0043122	regulation of I-kappaB kinase/NF-kappaB signaling	7/69	254/18800	3.99871e-05	0.000232689	0.000109421	TNFAIP3/TLR9/CD40/CD74/FYN/IL1B/TNF	7
BP	GO:0046425	regulation of JAK-STAT cascade	5/69	105/18800	4.17783e-05	0.000242619	0.000114091	IL7R/KIT/PTPRC/CCL5/TNF	5
BP	GO:0048771	tissue remodeling	6/69	174/18800	4.26514e-05	0.000247188	0.000116239	TNFAIP3/TGFB1/IGFBP5/TP53/INPP5D/MDK	6
BP	GO:0048245	eosinophil chemotaxis	3/69	19/18800	4.3959e-05	0.00025272	0.000118841	CCL2/CCL5/LGALS3	3
BP	GO:0060149	negative regulation of posttranscriptional gene silencing	3/69	19/18800	4.3959e-05	0.00025272	0.000118841	TGFB1/TP53/TNF	3
BP	GO:0060967	negative regulation of gene silencing by RNA	3/69	19/18800	4.3959e-05	0.00025272	0.000118841	TGFB1/TP53/TNF	3
BP	GO:1900369	negative regulation of RNA interference	3/69	19/18800	4.3959e-05	0.00025272	0.000118841	TGFB1/TP53/TNF	3
BP	GO:0071559	response to transforming growth factor beta	7/69	258/18800	4.41539e-05	0.000253332	0.000119129	TGFB1/TP53/FYN/SPI1/THBS1/EMILIN1/PTK2	7
BP	GO:0007229	integrin-mediated signaling pathway	5/69	107/18800	4.57362e-05	0.000261486	0.000122963	CD40LG/HCK/ITGAM/ITGB2/PTK2	5
BP	GO:0002823	negative regulation of adaptive immune response based on somatic recombination of immune receptors built from immunoglobulin superfamily domains	4/69	54/18800	4.57578e-05	0.000261486	0.000122963	TBX21/IL7R/PTPRC/PTPN6	4
BP	GO:0051480	regulation of cytosolic calcium ion concentration	8/69	356/18800	4.67162e-05	0.000266431	0.000125288	CD19/LCK/FYN/PTPRC/PTPN6/CXCL10/C3AR1/P2RX4	8
BP	GO:0048015	phosphatidylinositol-mediated signaling	6/69	177/18800	4.69232e-05	0.00026708	0.000125593	CD28/KIT/PTPN6/CCL5/TNF/PTK2	6
BP	GO:0006887	exocytosis	8/69	357/18800	4.76488e-05	0.000270672	0.000127282	KIT/RAC2/HCK/BTK/SPI1/CCL5/ITGAM/ITGB2	8
BP	GO:0051051	negative regulation of transport	9/69	464/18800	4.79412e-05	0.000271793	0.00012781	TNFRSF1B/MYC/TLR9/CD74/IL1B/SPI1/TNF/LGALS3/THBS1	9
BP	GO:0002707	negative regulation of lymphocyte mediated immunity	4/69	55/18800	4.92106e-05	0.000278439	0.000130935	TBX21/IL7R/PTPRC/PTPN6	4
BP	GO:0002577	regulation of antigen processing and presentation	3/69	20/18800	5.15806e-05	0.000290699	0.0001367	CD74/CD68/THBS1	3
BP	GO:0002643	regulation of tolerance induction	3/69	20/18800	5.15806e-05	0.000290699	0.0001367	CD3E/IL2RA/CD274	3
BP	GO:0051091	positive regulation of DNA-binding transcription factor activity	7/69	265/18800	5.23022e-05	0.000294187	0.00013834	CD40LG/TLR9/CD40/KIT/IL1B/BTK/TNF	7
BP	GO:0010332	response to gamma radiation	4/69	56/18800	5.285e-05	0.000296105	0.000139242	MYC/TP53/PTPRC/CXCL10	4
BP	GO:0061756	leukocyte adhesion to vascular endothelial cell	4/69	56/18800	5.285e-05	0.000296105	0.000139242	CXCL12/ITGB2/TNF/MDK	4
BP	GO:0048017	inositol lipid-mediated signaling	6/69	181/18800	5.31455e-05	0.000297179	0.000139747	CD28/KIT/PTPN6/CCL5/TNF/PTK2	6
BP	GO:0031348	negative regulation of defense response	7/69	268/18800	5.61527e-05	0.000313382	0.000147367	IL2RA/TNFAIP3/TNFRSF1B/FYN/PTPRC/HCK/MDK	7
BP	GO:0045766	positive regulation of angiogenesis	6/69	183/18800	5.64952e-05	0.000314069	0.00014769	CXCL8/CD40/IL1B/C3AR1/THBS1/MDK	6
BP	GO:1904018	positive regulation of vasculature development	6/69	183/18800	5.64952e-05	0.000314069	0.00014769	CXCL8/CD40/IL1B/C3AR1/THBS1/MDK	6
BP	GO:0043551	regulation of phosphatidylinositol 3-kinase activity	4/69	57/18800	5.6682e-05	0.000314497	0.000147891	TGFB1/CD19/KIT/PTK2	4
BP	GO:0033630	positive regulation of cell adhesion mediated by integrin	3/69	21/18800	6.00192e-05	0.000331728	0.000155994	CD3E/PTPN6/CCL5	3
BP	GO:0090280	positive regulation of calcium ion import	3/69	21/18800	6.00192e-05	0.000331728	0.000155994	CXCL12/CCL2/LGALS3	3
BP	GO:0032481	positive regulation of type I interferon production	4/69	58/18800	6.07129e-05	0.00033363	0.000156888	IRF1/CD14/IRF7/TLR9	4
BP	GO:0033619	membrane protein proteolysis	4/69	58/18800	6.07129e-05	0.00033363	0.000156888	TNFRSF1B/TGFB1/IL1B/TNF	4
BP	GO:0048010	vascular endothelial growth factor receptor signaling pathway	4/69	58/18800	6.07129e-05	0.00033363	0.000156888	FYN/IL1B/EMILIN1/PTK2	4
BP	GO:0002711	positive regulation of T cell mediated immunity	4/69	59/18800	6.4949e-05	0.000355543	0.000167193	TBX21/IL1B/PTPRC/HLA-DRA	4
BP	GO:0002820	negative regulation of adaptive immune response	4/69	59/18800	6.4949e-05	0.000355543	0.000167193	TBX21/IL7R/PTPRC/PTPN6	4
BP	GO:0043123	positive regulation of I-kappaB kinase/NF-kappaB signaling	6/69	188/18800	6.56129e-05	0.000358492	0.000168579	TLR9/CD40/CD74/FYN/IL1B/TNF	6
BP	GO:0010829	negative regulation of glucose transmembrane transport	3/69	22/18800	6.93134e-05	0.000375841	0.000176738	MYC/IL1B/TNF	3
BP	GO:0072574	hepatocyte proliferation	3/69	22/18800	6.93134e-05	0.000375841	0.000176738	TNFAIP3/TNF/MDK	3
BP	GO:0072575	epithelial cell proliferation involved in liver morphogenesis	3/69	22/18800	6.93134e-05	0.000375841	0.000176738	TNFAIP3/TNF/MDK	3
BP	GO:1903798	regulation of production of miRNAs involved in gene silencing by miRNA	3/69	22/18800	6.93134e-05	0.000375841	0.000176738	TGFB1/TP53/TNF	3
BP	GO:0043500	muscle adaptation	5/69	118/18800	7.29661e-05	0.0003949	0.0001857	TNFRSF1B/IGFBP5/IL1B/AIF1/P2RX4	5
BP	GO:0045428	regulation of nitric oxide biosynthetic process	4/69	61/18800	7.40617e-05	0.000400073	0.000188133	IL1B/TNF/AIF1/P2RX4	4
BP	GO:0050678	regulation of epithelial cell proliferation	8/69	382/18800	7.65625e-05	0.000412803	0.000194119	TNFAIP3/MYC/TGFB1/CXCL12/CCL2/TNF/THBS1/MDK	8
BP	GO:0046641	positive regulation of alpha-beta T cell proliferation	3/69	23/18800	7.9501e-05	0.000423857	0.000199318	CD3E/CD28/PTPRC	3
BP	GO:0070920	regulation of production of small RNA involved in gene silencing by RNA	3/69	23/18800	7.9501e-05	0.000423857	0.000199318	TGFB1/TP53/TNF	3
BP	GO:0072576	liver morphogenesis	3/69	23/18800	7.9501e-05	0.000423857	0.000199318	TNFAIP3/TNF/MDK	3
BP	GO:0072677	eosinophil migration	3/69	23/18800	7.9501e-05	0.000423857	0.000199318	CCL2/CCL5/LGALS3	3
BP	GO:1990840	response to lectin	3/69	23/18800	7.9501e-05	0.000423857	0.000199318	MYC/FYN/TYROBP	3
BP	GO:1990858	cellular response to lectin	3/69	23/18800	7.9501e-05	0.000423857	0.000199318	MYC/FYN/TYROBP	3
BP	GO:0051209	release of sequestered calcium ion into cytosol	5/69	121/18800	8.22031e-05	0.000437449	0.000205709	CD19/LCK/PTPRC/PTPN6/CXCL10	5
BP	GO:0010573	vascular endothelial growth factor production	4/69	63/18800	8.40718e-05	0.000445736	0.000209606	TGFB1/IL1B/TNF/C3AR1	4
BP	GO:0048002	antigen processing and presentation of peptide antigen	4/69	63/18800	8.40718e-05	0.000445736	0.000209606	CD74/CTSS/FCER1G/HLA-DRA	4
BP	GO:0051283	negative regulation of sequestering of calcium ion	5/69	122/18800	8.54739e-05	0.000452333	0.000212708	CD19/LCK/PTPRC/PTPN6/CXCL10	5
BP	GO:0032388	positive regulation of intracellular transport	6/69	198/18800	8.73699e-05	0.000460663	0.000216625	TGFB1/FYN/RAC2/IL1B/ITGAM/ITGB2	6
BP	GO:0032872	regulation of stress-activated MAPK cascade	6/69	198/18800	8.73699e-05	0.000460663	0.000216625	MYC/TLR9/IL1B/SPI1/TNF/MAPK1	6
BP	GO:0045670	regulation of osteoclast differentiation	4/69	64/18800	8.94295e-05	0.000469792	0.000220918	CSF1/INPP5D/TYROBP/TNF	4
BP	GO:0080164	regulation of nitric oxide metabolic process	4/69	64/18800	8.94295e-05	0.000469792	0.000220918	IL1B/TNF/AIF1/P2RX4	4
BP	GO:0002922	positive regulation of humoral immune response	3/69	24/18800	9.06197e-05	0.000472576	0.000222227	IL1B/PTPRC/TNF	3
BP	GO:0045672	positive regulation of osteoclast differentiation	3/69	24/18800	9.06197e-05	0.000472576	0.000222227	CSF1/TYROBP/TNF	3
BP	GO:0051043	regulation of membrane protein ectodomain proteolysis	3/69	24/18800	9.06197e-05	0.000472576	0.000222227	TNFRSF1B/IL1B/TNF	3
BP	GO:1904996	positive regulation of leukocyte adhesion to vascular endothelial cell	3/69	24/18800	9.06197e-05	0.000472576	0.000222227	ITGB2/TNF/MDK	3
BP	GO:0051282	regulation of sequestering of calcium ion	5/69	124/18800	9.23155e-05	0.000479805	0.000225627	CD19/LCK/PTPRC/PTPN6/CXCL10	5
BP	GO:0007179	transforming growth factor beta receptor signaling pathway	6/69	200/18800	9.23411e-05	0.000479805	0.000225627	TGFB1/TP53/SPI1/THBS1/EMILIN1/PTK2	6
BP	GO:0070302	regulation of stress-activated protein kinase signaling cascade	6/69	201/18800	9.49099e-05	0.000490224	0.000230526	MYC/TLR9/IL1B/SPI1/TNF/MAPK1	6
BP	GO:0002260	lymphocyte homeostasis	4/69	65/18800	9.50313e-05	0.000490224	0.000230526	IL2RA/TNFAIP3/CD74/TNFSF13B	4
BP	GO:0042093	T-helper cell differentiation	4/69	65/18800	9.50313e-05	0.000490224	0.000230526	TBX21/STAT6/CD86/HLA-DRA	4
BP	GO:0045576	mast cell activation	4/69	65/18800	9.50313e-05	0.000490224	0.000230526	KIT/RAC2/BTK/PTPN6	4
BP	GO:0019722	calcium-mediated signaling	6/69	202/18800	9.75352e-05	0.000502236	0.000236175	CD3E/CXCL8/PTPRC/BTK/TNF/P2RX4	6
BP	GO:0051222	positive regulation of protein transport	7/69	293/18800	9.81948e-05	0.000504725	0.000237345	TGFB1/FYN/RAC2/IL1B/ITGAM/ITGB2/TNF	7
BP	GO:0045662	negative regulation of myoblast differentiation	3/69	25/18800	0.000102707	0.000525087	0.00024692	TGFB1/CXCL10/TNF	3
BP	GO:0060333	interferon-gamma-mediated signaling pathway	3/69	25/18800	0.000102707	0.000525087	0.00024692	IRF1/TP53/HCK	3
BP	GO:0062149	NA	3/69	25/18800	0.000102707	0.000525087	0.00024692	CXCL12/FYN/TNF	3
BP	GO:0002294	CD4-positive, alpha-beta T cell differentiation involved in immune response	4/69	67/18800	0.000106994	0.000544461	0.000256031	TBX21/STAT6/CD86/HLA-DRA	4
BP	GO:0046637	regulation of alpha-beta T cell differentiation	4/69	67/18800	0.000106994	0.000544461	0.000256031	TBX21/CD83/CD86/HLA-DRA	4
BP	GO:0006911	phagocytosis, engulfment	5/69	128/18800	0.000107257	0.000544461	0.000256031	RAC2/ITGAM/ITGB2/AIF1/THBS1	5
BP	GO:0051208	sequestering of calcium ion	5/69	128/18800	0.000107257	0.000544461	0.000256031	CD19/LCK/PTPRC/PTPN6/CXCL10	5
BP	GO:0043523	regulation of neuron apoptotic process	6/69	207/18800	0.000111543	0.000565217	0.000265791	TP53/CCL2/ITGAM/TYROBP/TNF/MDK	6
BP	GO:0002287	alpha-beta T cell activation involved in immune response	4/69	68/18800	0.000113368	0.000571429	0.000268712	TBX21/STAT6/CD86/HLA-DRA	4
BP	GO:0002293	alpha-beta T cell differentiation involved in immune response	4/69	68/18800	0.000113368	0.000571429	0.000268712	TBX21/STAT6/CD86/HLA-DRA	4
BP	GO:0002720	positive regulation of cytokine production involved in immune response	4/69	68/18800	0.000113368	0.000571429	0.000268712	TBX21/KIT/CD74/IL1B	4
BP	GO:0030168	platelet activation	5/69	130/18800	0.00011539	0.000580602	0.000273026	CD40LG/CD40/LCK/PTPN6/FCER1G	5
BP	GO:0071378	cellular response to growth hormone stimulus	3/69	26/18800	0.000115798	0.000580613	0.000273031	STAT6/MYC/PTK2	3
BP	GO:1901623	regulation of lymphocyte chemotaxis	3/69	26/18800	0.000115798	0.000580613	0.000273031	CCL2/CCL5/CXCL10	3
BP	GO:0043550	regulation of lipid kinase activity	4/69	69/18800	0.000120013	0.000600693	0.000282474	TGFB1/CD19/KIT/PTK2	4
BP	GO:0019932	second-messenger-mediated signaling	7/69	303/18800	0.000120952	0.000604338	0.000284188	CD3E/CXCL8/PTPRC/BTK/TNF/THBS1/P2RX4	7
BP	GO:0032890	regulation of organic acid transport	4/69	70/18800	0.000126936	0.000633131	0.000297728	IL1B/TNF/THBS1/P2RX4	4
BP	GO:0002675	positive regulation of acute inflammatory response	3/69	27/18800	0.000129931	0.000643585	0.000302644	IL1B/BTK/TNF	3
BP	GO:0002710	negative regulation of T cell mediated immunity	3/69	27/18800	0.000129931	0.000643585	0.000302644	TBX21/IL7R/PTPRC	3
BP	GO:0002719	negative regulation of cytokine production involved in immune response	3/69	27/18800	0.000129931	0.000643585	0.000302644	TBX21/TGFB1/TNF	3
BP	GO:2000108	positive regulation of leukocyte apoptotic process	3/69	27/18800	0.000129931	0.000643585	0.000302644	CD274/TP53/CCL5	3
BP	GO:0019079	viral genome replication	5/69	134/18800	0.000133072	0.000658004	0.000309424	CD28/CXCL8/CCL2/CCL5/TNF	5
BP	GO:1904951	positive regulation of establishment of protein localization	7/69	309/18800	0.00013655	0.00067404	0.000316965	TGFB1/FYN/RAC2/IL1B/ITGAM/ITGB2/TNF	7
BP	GO:0006801	superoxide metabolic process	4/69	72/18800	0.000141644	0.000697979	0.000328222	TGFB1/ITGAM/ITGB2/TYROBP	4
BP	GO:0009581	detection of external stimulus	5/69	136/18800	0.000142655	0.000701757	0.000329999	CXCL12/KIT/FYN/TNF/PTK2	5
BP	GO:0002360	T cell lineage commitment	3/69	28/18800	0.000145141	0.000709109	0.000333456	TBX21/STAT6/TP53	3
BP	GO:0002758	innate immune response-activating signal transduction	3/69	28/18800	0.000145141	0.000709109	0.000333456	FYN/HCK/TYROBP	3
BP	GO:0032703	negative regulation of interleukin-2 production	3/69	28/18800	0.000145141	0.000709109	0.000333456	TBX21/TNFAIP3/PTPRC	3
BP	GO:0090314	positive regulation of protein targeting to membrane	3/69	28/18800	0.000145141	0.000709109	0.000333456	FYN/ITGAM/ITGB2	3
BP	GO:0099024	plasma membrane invagination	5/69	137/18800	0.000147641	0.000720096	0.000338623	RAC2/ITGAM/ITGB2/AIF1/THBS1	5
BP	GO:0010001	glial cell differentiation	6/69	218/18800	0.000148006	0.00072065	0.000338883	TNFRSF1B/TGFB1/IL1B/TNF/MAPK1/MDK	6
BP	GO:0009582	detection of abiotic stimulus	5/69	139/18800	0.000158012	0.000766759	0.000360566	CXCL12/KIT/FYN/TNF/PTK2	5
BP	GO:1903900	regulation of viral life cycle	5/69	139/18800	0.000158012	0.000766759	0.000360566	CD28/CXCL8/CD74/CCL5/TNF	5
BP	GO:0007596	blood coagulation	6/69	221/18800	0.000159431	0.000772338	0.000363189	CD40LG/CD40/LCK/PTPN6/FCER1G/THBS1	6
BP	GO:0010575	positive regulation of vascular endothelial growth factor production	3/69	29/18800	0.000161463	0.000778229	0.00036596	TGFB1/IL1B/C3AR1	3
BP	GO:0030212	hyaluronan metabolic process	3/69	29/18800	0.000161463	0.000778229	0.00036596	CD44/TGFB1/IL1B	3
BP	GO:0061082	myeloid leukocyte cytokine production	3/69	29/18800	0.000161463	0.000778229	0.00036596	TGFB1/KIT/CD74	3
BP	GO:0006809	nitric oxide biosynthetic process	4/69	75/18800	0.000165965	0.000797244	0.000374901	IL1B/TNF/AIF1/P2RX4	4
BP	GO:0043536	positive regulation of blood vessel endothelial cell migration	4/69	75/18800	0.000165965	0.000797244	0.000374901	TGFB1/CD40/THBS1/P2RX4	4
BP	GO:0034763	negative regulation of transmembrane transport	5/69	141/18800	0.000168931	0.000810133	0.000380962	MYC/TLR9/IL1B/TNF/THBS1	5
BP	GO:0033157	regulation of intracellular protein transport	6/69	224/18800	0.000171544	0.000819917	0.000385563	TGFB1/FYN/RAC2/IL1B/ITGAM/ITGB2	6
BP	GO:0046777	protein autophosphorylation	6/69	224/18800	0.000171544	0.000819917	0.000385563	KIT/FYN/PTPRC/HCK/BTK/PTK2	6
BP	GO:0034121	regulation of toll-like receptor signaling pathway	4/69	76/18800	0.000174703	0.000833625	0.000392009	TNFAIP3/IRF1/IRF7/TLR9	4
BP	GO:0060251	regulation of glial cell proliferation	3/69	30/18800	0.000178932	0.000850969	0.000400165	MYC/IL1B/TNF	3
BP	GO:1902230	negative regulation of intrinsic apoptotic signaling pathway in response to DNA damage	3/69	30/18800	0.000178932	0.000850969	0.000400165	CD44/CXCL12/CD74	3
BP	GO:0050817	coagulation	6/69	226/18800	0.000180016	0.000854701	0.00040192	CD40LG/CD40/LCK/PTPN6/FCER1G/THBS1	6
BP	GO:0006979	response to oxidative stress	8/69	433/18800	0.000181565	0.000860628	0.000404707	STAT6/TNFAIP3/TP53/FYN/BTK/TNF/AIF1/MAPK1	8
BP	GO:0007599	hemostasis	6/69	227/18800	0.000184374	0.0008725	0.00041029	CD40LG/CD40/LCK/PTPN6/FCER1G/THBS1	6
BP	GO:0010324	membrane invagination	5/69	144/18800	0.00018638	0.000880538	0.00041407	RAC2/ITGAM/ITGB2/AIF1/THBS1	5
BP	GO:1903533	regulation of protein targeting	4/69	78/18800	0.000193169	0.000910418	0.000428121	FYN/RAC2/ITGAM/ITGB2	4
BP	GO:2000116	regulation of cysteine-type endopeptidase activity	6/69	229/18800	0.00019334	0.000910418	0.000428121	CD44/MYC/LCK/FYN/TNF/THBS1	6
BP	GO:0001782	B cell homeostasis	3/69	31/18800	0.000197584	0.000928872	0.000436799	TNFAIP3/CD74/TNFSF13B	3
BP	GO:0010594	regulation of endothelial cell migration	6/69	230/18800	0.000197951	0.000929073	0.000436893	TGFB1/CD40/TNF/THBS1/PTK2/P2RX4	6
BP	GO:0072332	intrinsic apoptotic signaling pathway by p53 class mediator	4/69	79/18800	0.000202912	0.000950797	0.000447109	CD44/MYC/TP53/CD74	4
BP	GO:0032386	regulation of intracellular transport	7/69	332/18800	0.000212217	0.000992773	0.000466848	TGFB1/FYN/RAC2/IL1B/ITGAM/ITGB2/MAPK1	7
BP	GO:0043372	positive regulation of CD4-positive, alpha-beta T cell differentiation	3/69	32/18800	0.000217452	0.00101395	0.000476806	CD83/CD86/HLA-DRA	3
BP	GO:1901889	negative regulation of cell junction assembly	3/69	32/18800	0.000217452	0.00101395	0.000476806	IL1B/TNF/THBS1	3
BP	GO:0046209	nitric oxide metabolic process	4/69	81/18800	0.000223453	0.00104024	0.000489167	IL1B/TNF/AIF1/P2RX4	4
BP	GO:0043535	regulation of blood vessel endothelial cell migration	5/69	150/18800	0.000225378	0.0010475	0.000492582	TGFB1/CD40/TNF/THBS1/P2RX4	5
BP	GO:2001057	reactive nitrogen species metabolic process	4/69	82/18800	0.000234266	0.00108704	0.000511176	IL1B/TNF/AIF1/P2RX4	4
BP	GO:0048566	embryonic digestive tract development	3/69	33/18800	0.000238569	0.00109988	0.000517214	CXCL8/TNF/RARRES2	3
BP	GO:0055094	response to lipoprotein particle	3/69	33/18800	0.000238569	0.00109988	0.000517214	CD68/FCER1G/ITGB2	3
BP	GO:0070229	negative regulation of lymphocyte apoptotic process	3/69	33/18800	0.000238569	0.00109988	0.000517214	IL7R/CD74/CCL5	3
BP	GO:2000191	regulation of fatty acid transport	3/69	33/18800	0.000238569	0.00109988	0.000517214	IL1B/THBS1/P2RX4	3
BP	GO:0044409	entry into host	5/69	153/18800	0.000247065	0.00113722	0.000534772	CXCL8/CD74/CD86/MRC1/ICAM1	5
BP	GO:0051402	neuron apoptotic process	6/69	241/18800	0.000254636	0.00117018	0.000550273	TP53/CCL2/ITGAM/TYROBP/TNF/MDK	6
BP	GO:0002335	mature B cell differentiation	3/69	34/18800	0.000260971	0.00119354	0.00056126	IRF8/CD19/SPI1	3
BP	GO:0050850	positive regulation of calcium-mediated signaling	3/69	34/18800	0.000260971	0.00119354	0.00056126	CD3E/TNF/P2RX4	3
BP	GO:0090313	regulation of protein targeting to membrane	3/69	34/18800	0.000260971	0.00119354	0.00056126	FYN/ITGAM/ITGB2	3
BP	GO:1905952	regulation of lipid localization	5/69	155/18800	0.000262382	0.00119808	0.000563395	IL1B/NFKBIA/TNF/THBS1/P2RX4	5
BP	GO:1903169	regulation of calcium ion transmembrane transport	5/69	156/18800	0.000270305	0.0012323	0.000579484	TLR9/CD19/FYN/PTPN6/CXCL10	5
BP	GO:0051403	stress-activated MAPK cascade	6/69	245/18800	0.000278154	0.00126607	0.000595363	MYC/TLR9/IL1B/SPI1/TNF/MAPK1	6
BP	GO:0006898	receptor-mediated endocytosis	6/69	246/18800	0.000284293	0.00128762	0.000605498	CXCL8/CD14/MRC1/FCER1G/ITGAM/ITGB2	6
BP	GO:0002446	neutrophil mediated immunity	3/69	35/18800	0.000284688	0.00128762	0.000605498	SPI1/ITGAM/ITGB2	3
BP	GO:0010762	regulation of fibroblast migration	3/69	35/18800	0.000284688	0.00128762	0.000605498	TGFB1/THBS1/PTK2	3
BP	GO:0098751	bone cell development	3/69	35/18800	0.000284688	0.00128762	0.000605498	KIT/PTPN6/TYROBP	3
BP	GO:0045069	regulation of viral genome replication	4/69	87/18800	0.000294055	0.00132789	0.000624434	CD28/CXCL8/CCL5/TNF	4
BP	GO:0050792	regulation of viral process	5/69	159/18800	0.000295171	0.00133082	0.000625815	CD28/CXCL8/CD74/CCL5/TNF	5
BP	GO:1904062	regulation of cation transmembrane transport	7/69	352/18800	0.000302774	0.00136296	0.000640926	TLR9/CD19/FYN/CCL2/CTSS/PTPN6/CXCL10	7
BP	GO:0046849	bone remodeling	4/69	88/18800	0.000307211	0.00138076	0.000649298	TNFAIP3/TGFB1/INPP5D/MDK	4
BP	GO:0043516	regulation of DNA damage response, signal transduction by p53 class mediator	3/69	36/18800	0.000309754	0.00138784	0.000652625	CD44/TP53/CD74	3
BP	GO:0071402	cellular response to lipoprotein particle stimulus	3/69	36/18800	0.000309754	0.00138784	0.000652625	CD68/FCER1G/ITGB2	3
BP	GO:0001776	leukocyte homeostasis	4/69	89/18800	0.000320783	0.001435	0.000674806	IL2RA/TNFAIP3/CD74/TNFSF13B	4
BP	GO:0031098	stress-activated protein kinase signaling cascade	6/69	252/18800	0.000323396	0.00144444	0.000679241	MYC/TLR9/IL1B/SPI1/TNF/MAPK1	6
BP	GO:0010631	epithelial cell migration	7/69	358/18800	0.000335289	0.00149464	0.000702848	TGFB1/CD40/KIT/TNF/THBS1/PTK2/P2RX4	7
BP	GO:0003176	aortic valve development	3/69	37/18800	0.000336202	0.00149464	0.000702848	TNFRSF1B/TGFB1/EMILIN1	3
BP	GO:0014741	negative regulation of muscle hypertrophy	3/69	37/18800	0.000336202	0.00149464	0.000702848	TNFRSF1B/IGFBP5/P2RX4	3
BP	GO:0034765	regulation of ion transmembrane transport	8/69	476/18800	0.000343903	0.0015265	0.000717833	TLR9/CD19/FYN/CCL2/CTSS/PTPN6/CXCL10/TNF	8
BP	GO:0035304	regulation of protein dephosphorylation	4/69	91/18800	0.000349211	0.00154527	0.000726658	TGFB1/PTPRC/TNF/LGALS3	4
BP	GO:0070509	calcium ion import	4/69	91/18800	0.000349211	0.00154527	0.000726658	CXCL12/FYN/CCL2/LGALS3	4
BP	GO:0090132	epithelium migration	7/69	361/18800	0.000352567	0.00155772	0.00073251	TGFB1/CD40/KIT/TNF/THBS1/PTK2/P2RX4	7
BP	GO:0007346	regulation of mitotic cell cycle	8/69	478/18800	0.000353667	0.00156017	0.000733664	CD28/MYC/TP53/IL1B/CCL2/PTPN6/TNF/AIF1	8
BP	GO:1903034	regulation of response to wounding	5/69	166/18800	0.00035993	0.00158535	0.000745506	TNFAIP3/TNF/THBS1/PTK2/MDK	5
BP	GO:0002369	T cell cytokine production	3/69	38/18800	0.000364063	0.00158889	0.000747169	TBX21/TNFRSF1B/IL1B	3
BP	GO:0002701	negative regulation of production of molecular mediator of immune response	3/69	38/18800	0.000364063	0.00158889	0.000747169	TBX21/TGFB1/TNF	3
BP	GO:0002724	regulation of T cell cytokine production	3/69	38/18800	0.000364063	0.00158889	0.000747169	TBX21/TNFRSF1B/IL1B	3
BP	GO:0010742	macrophage derived foam cell differentiation	3/69	38/18800	0.000364063	0.00158889	0.000747169	TGFB1/CSF1/NFKBIA	3
BP	GO:0045622	regulation of T-helper cell differentiation	3/69	38/18800	0.000364063	0.00158889	0.000747169	TBX21/CD86/HLA-DRA	3
BP	GO:1902229	regulation of intrinsic apoptotic signaling pathway in response to DNA damage	3/69	38/18800	0.000364063	0.00158889	0.000747169	CD44/CXCL12/CD74	3
BP	GO:0051048	negative regulation of secretion	5/69	167/18800	0.000369993	0.0016123	0.00075818	TNFRSF1B/CD74/IL1B/SPI1/TNF	5
BP	GO:0042742	defense response to bacterium	7/69	364/18800	0.000370554	0.0016123	0.00075818	IL7R/IRF8/TLR9/FCER1G/TNF/RARRES2/EMILIN1	7
BP	GO:0090130	tissue migration	7/69	366/18800	0.000382949	0.00166371	0.000782352	TGFB1/CD40/KIT/TNF/THBS1/PTK2/P2RX4	7
BP	GO:0002691	regulation of cellular extravasation	3/69	39/18800	0.000393367	0.0016961	0.000797585	CXCL12/ICAM1/MDK	3
BP	GO:0032728	positive regulation of interferon-beta production	3/69	39/18800	0.000393367	0.0016961	0.000797585	IRF1/IRF7/TLR9	3
BP	GO:0090077	foam cell differentiation	3/69	39/18800	0.000393367	0.0016961	0.000797585	TGFB1/CSF1/NFKBIA	3
BP	GO:0097242	amyloid-beta clearance	3/69	39/18800	0.000393367	0.0016961	0.000797585	ITGAM/ITGB2/TNF	3
BP	GO:2000516	positive regulation of CD4-positive, alpha-beta T cell activation	3/69	39/18800	0.000393367	0.0016961	0.000797585	CD83/CD86/HLA-DRA	3
BP	GO:0045862	positive regulation of proteolysis	7/69	369/18800	0.000402164	0.00173142	0.000814194	TNFRSF1B/MYC/LCK/FYN/IL1B/TNF/PTK2	7
BP	GO:0032088	negative regulation of NF-kappaB transcription factor activity	4/69	95/18800	0.000411408	0.00176591	0.000830412	TNFAIP3/TLR9/SPI1/NFKBIA	4
BP	GO:0043502	regulation of muscle adaptation	4/69	95/18800	0.000411408	0.00176591	0.000830412	TNFRSF1B/IGFBP5/AIF1/P2RX4	4
BP	GO:0001914	regulation of T cell mediated cytotoxicity	3/69	40/18800	0.000424148	0.00181787	0.000854845	IL7R/PTPRC/HLA-DRA	3
BP	GO:0030316	osteoclast differentiation	4/69	96/18800	0.000428116	0.00183213	0.000861553	CSF1/INPP5D/TYROBP/TNF	4
BP	GO:0044089	positive regulation of cellular component biogenesis	8/69	494/18800	0.000440236	0.00188119	0.000884621	TGFB1/TP53/KIT/RAC2/HCK/TNF/LGALS3/EMILIN1	8
BP	GO:0051223	regulation of protein transport	8/69	495/18800	0.000446173	0.00190372	0.000895215	TGFB1/FYN/RAC2/IL1B/CCL5/ITGAM/ITGB2/TNF	8
BP	GO:1905314	semi-lunar valve development	3/69	41/18800	0.000456434	0.0019446	0.000914441	TNFRSF1B/TGFB1/EMILIN1	3
BP	GO:0043534	blood vessel endothelial cell migration	5/69	175/18800	0.000458359	0.0019499	0.000916932	TGFB1/CD40/TNF/THBS1/P2RX4	5
BP	GO:0021549	cerebellum development	4/69	98/18800	0.000462976	0.00196662	0.000924795	CD3E/TP53/AIF1/MDK	4
BP	GO:0050954	sensory perception of mechanical stimulus	5/69	177/18800	0.000482743	0.00204452	0.000961426	CXCL12/KIT/FYN/TNF/P2RX4	5
BP	GO:0052126	movement in host environment	5/69	177/18800	0.000482743	0.00204452	0.000961426	CXCL8/CD74/CD86/MRC1/ICAM1	5
BP	GO:0034142	toll-like receptor 4 signaling pathway	3/69	42/18800	0.000490256	0.00206716	0.000972077	TNFAIP3/CD14/NFKBIA	3
BP	GO:0045687	positive regulation of glial cell differentiation	3/69	42/18800	0.000490256	0.00206716	0.000972077	TNFRSF1B/TGFB1/MDK	3
BP	GO:0060964	regulation of gene silencing by miRNA	3/69	42/18800	0.000490256	0.00206716	0.000972077	TGFB1/TP53/TNF	3
BP	GO:0001936	regulation of endothelial cell proliferation	5/69	178/18800	0.000495295	0.00208534	0.000980624	CXCL12/CCL2/TNF/THBS1/MDK	5
BP	GO:1903532	positive regulation of secretion by cell	6/69	274/18800	0.000504178	0.00211962	0.000996745	TGFB1/CXCL12/IL1B/ITGAM/ITGB2/P2RX4	6
BP	GO:0043409	negative regulation of MAPK cascade	5/69	179/18800	0.000508093	0.00213295	0.00100301	MYC/IL1B/PTPRC/PTPN6/EMILIN1	5
BP	GO:0009266	response to temperature stimulus	5/69	180/18800	0.000521137	0.0021845	0.00102726	CD14/CXCL12/CXCL10/NFKBIA/THBS1	5
BP	GO:0035019	somatic stem cell population maintenance	3/69	43/18800	0.000525645	0.00219697	0.00103312	MYC/KIT/SPI1	3
BP	GO:0042771	intrinsic apoptotic signaling pathway in response to DNA damage by p53 class mediator	3/69	43/18800	0.000525645	0.00219697	0.00103312	CD44/TP53/CD74	3
BP	GO:0043542	endothelial cell migration	6/69	279/18800	0.000554527	0.0023143	0.00108829	TGFB1/CD40/TNF/THBS1/PTK2/P2RX4	6
BP	GO:1901796	regulation of signal transduction by p53 class mediator	4/69	103/18800	0.000558924	0.0023244	0.00109304	CD44/MYC/TP53/CD74	4
BP	GO:0006509	membrane protein ectodomain proteolysis	3/69	44/18800	0.00056263	0.0023244	0.00109304	TNFRSF1B/IL1B/TNF	3
BP	GO:0045840	positive regulation of mitotic nuclear division	3/69	44/18800	0.00056263	0.0023244	0.00109304	CD28/IL1B/TNF	3
BP	GO:0050856	regulation of T cell receptor signaling pathway	3/69	44/18800	0.00056263	0.0023244	0.00109304	LCK/PTPN6/LGALS3	3
BP	GO:0060147	regulation of posttranscriptional gene silencing	3/69	44/18800	0.00056263	0.0023244	0.00109304	TGFB1/TP53/TNF	3
BP	GO:0060443	mammary gland morphogenesis	3/69	44/18800	0.00056263	0.0023244	0.00109304	STAT6/IGFBP5/CSF1	3
BP	GO:1900368	regulation of RNA interference	3/69	44/18800	0.00056263	0.0023244	0.00109304	TGFB1/TP53/TNF	3
BP	GO:0001915	negative regulation of T cell mediated cytotoxicity	2/69	10/18800	0.000586165	0.00240085	0.00112899	IL7R/PTPRC	2
BP	GO:0002291	T cell activation via T cell receptor contact with antigen bound to MHC molecule on antigen presenting cell	2/69	10/18800	0.000586165	0.00240085	0.00112899	ICAM1/LGALS3	2
BP	GO:0030214	hyaluronan catabolic process	2/69	10/18800	0.000586165	0.00240085	0.00112899	CD44/TGFB1	2
BP	GO:0035747	natural killer cell chemotaxis	2/69	10/18800	0.000586165	0.00240085	0.00112899	CCL2/CCL5	2
BP	GO:0045657	positive regulation of monocyte differentiation	2/69	10/18800	0.000586165	0.00240085	0.00112899	CD74/CSF1	2
BP	GO:1901203	positive regulation of extracellular matrix assembly	2/69	10/18800	0.000586165	0.00240085	0.00112899	TGFB1/EMILIN1	2
BP	GO:0042088	T-helper 1 type immune response	3/69	45/18800	0.000601239	0.00245556	0.00115472	TBX21/STAT6/IL1B	3
BP	GO:1904646	cellular response to amyloid-beta	3/69	45/18800	0.000601239	0.00245556	0.00115472	FYN/ICAM1/TNF	3
BP	GO:0062207	NA	4/69	106/18800	0.000622842	0.00254016	0.0011945	TNFAIP3/IRF1/IRF7/TLR9	4
BP	GO:0044403	symbiont process	6/69	286/18800	0.0006315	0.00257181	0.00120939	CXCL8/CD74/CD86/MRC1/CCL5/ICAM1	6
BP	GO:0060966	regulation of gene silencing by RNA	3/69	46/18800	0.000641502	0.00260883	0.0012268	TGFB1/TP53/TNF	3
BP	GO:0022037	metencephalon development	4/69	107/18800	0.000645253	0.00262037	0.00123222	CD3E/TP53/AIF1/MDK	4
BP	GO:0010632	regulation of epithelial cell migration	6/69	290/18800	0.000679067	0.00275378	0.00129496	TGFB1/CD40/TNF/THBS1/PTK2/P2RX4	6
BP	GO:0051701	interaction with host	5/69	191/18800	0.00068186	0.00275593	0.00129596	CXCL8/CD74/CD86/MRC1/ICAM1	5
BP	GO:0002673	regulation of acute inflammatory response	3/69	47/18800	0.000683447	0.00275593	0.00129596	IL1B/BTK/TNF	3
BP	GO:0051972	regulation of telomerase activity	3/69	47/18800	0.000683447	0.00275593	0.00129596	MYC/TP53/MAPK1	3
BP	GO:1905953	negative regulation of lipid localization	3/69	47/18800	0.000683447	0.00275593	0.00129596	NFKBIA/TNF/THBS1	3
BP	GO:0043434	response to peptide hormone	7/69	404/18800	0.00068896	0.00277425	0.00130458	STAT6/MYC/CXCL12/IGFBP5/IL1B/RARRES2/PTK2	7
BP	GO:0006470	protein dephosphorylation	6/69	291/18800	0.000691383	0.00277781	0.00130625	TGFB1/LCK/PTPRC/PTPN6/TNF/LGALS3	6
BP	GO:0009408	response to heat	4/69	109/18800	0.000691784	0.00277781	0.00130625	CD14/CXCL12/CXCL10/THBS1	4
BP	GO:0001660	fever generation	2/69	11/18800	0.000714725	0.00284598	0.00133831	IL1B/TNF	2
BP	GO:0002327	immature B cell differentiation	2/69	11/18800	0.000714725	0.00284598	0.00133831	KIT/SPI1	2
BP	GO:0002551	mast cell chemotaxis	2/69	11/18800	0.000714725	0.00284598	0.00133831	KIT/RAC2	2
BP	GO:0033632	regulation of cell-cell adhesion mediated by integrin	2/69	11/18800	0.000714725	0.00284598	0.00133831	CD3E/CCL5	2
BP	GO:0042118	endothelial cell activation	2/69	11/18800	0.000714725	0.00284598	0.00133831	CXCL10/P2RX4	2
BP	GO:1903977	positive regulation of glial cell migration	2/69	11/18800	0.000714725	0.00284598	0.00133831	CSF1/P2RX4	2
BP	GO:0010761	fibroblast migration	3/69	48/18800	0.000727101	0.00288323	0.00135583	TGFB1/THBS1/PTK2	3
BP	GO:0050798	activated T cell proliferation	3/69	48/18800	0.000727101	0.00288323	0.00135583	IL2RA/CD274/FYN	3
BP	GO:0061028	establishment of endothelial barrier	3/69	48/18800	0.000727101	0.00288323	0.00135583	IL1B/ICAM1/TNF	3
BP	GO:0001935	endothelial cell proliferation	5/69	194/18800	0.00073151	0.0028927	0.00136028	CXCL12/CCL2/TNF/THBS1/MDK	5
BP	GO:0031334	positive regulation of protein complex assembly	5/69	194/18800	0.00073151	0.0028927	0.00136028	TGFB1/TP53/HCK/TNF/LGALS3	5
BP	GO:0009410	response to xenobiotic stimulus	7/69	411/18800	0.000762143	0.00300967	0.00141529	MYC/TP53/LCK/IL1B/TNF/THBS1/MDK	7
BP	GO:0030225	macrophage differentiation	3/69	49/18800	0.000772494	0.00304216	0.00143057	TGFB1/CSF1/SPI1	3
BP	GO:0046850	regulation of bone remodeling	3/69	49/18800	0.000772494	0.00304216	0.00143057	TNFAIP3/INPP5D/MDK	3
BP	GO:0051047	positive regulation of secretion	6/69	300/18800	0.00081019	0.00318623	0.00149831	TGFB1/CXCL12/IL1B/ITGAM/ITGB2/P2RX4	6
BP	GO:0001913	T cell mediated cytotoxicity	3/69	50/18800	0.000819652	0.00320145	0.00150547	IL7R/PTPRC/HLA-DRA	3
BP	GO:0043303	mast cell degranulation	3/69	50/18800	0.000819652	0.00320145	0.00150547	KIT/RAC2/BTK	3
BP	GO:0046638	positive regulation of alpha-beta T cell differentiation	3/69	50/18800	0.000819652	0.00320145	0.00150547	CD83/CD86/HLA-DRA	3
BP	GO:1903053	regulation of extracellular matrix organization	3/69	50/18800	0.000819652	0.00320145	0.00150547	TNFRSF1B/TGFB1/EMILIN1	3
BP	GO:2001238	positive regulation of extrinsic apoptotic signaling pathway	3/69	50/18800	0.000819652	0.00320145	0.00150547	PTPRC/TNF/THBS1	3
BP	GO:0002645	positive regulation of tolerance induction	2/69	12/18800	0.000855637	0.00331936	0.00156092	CD3E/CD274	2
BP	GO:0031650	regulation of heat generation	2/69	12/18800	0.000855637	0.00331936	0.00156092	IL1B/TNF	2
BP	GO:0032908	regulation of transforming growth factor beta1 production	2/69	12/18800	0.000855637	0.00331936	0.00156092	TYROBP/THBS1	2
BP	GO:0097531	mast cell migration	2/69	12/18800	0.000855637	0.00331936	0.00156092	KIT/RAC2	2
BP	GO:1903800	positive regulation of production of miRNAs involved in gene silencing by miRNA	2/69	12/18800	0.000855637	0.00331936	0.00156092	TGFB1/TP53	2
BP	GO:0001503	ossification	7/69	420/18800	0.000865157	0.00335175	0.00157615	TGFB1/IGFBP5/CSF1/TNF/MAPK1/PTK2/MDK	7
BP	GO:0008347	glial cell migration	3/69	51/18800	0.000868601	0.00336055	0.00158029	CSF1/CCL2/P2RX4	3
BP	GO:0016311	dephosphorylation	7/69	422/18800	0.000889479	0.00343668	0.00161609	TGFB1/LCK/PTPRC/PTPN6/INPP5D/TNF/LGALS3	7
BP	GO:0000302	response to reactive oxygen species	5/69	203/18800	0.000896773	0.00345938	0.00162676	STAT6/TNFAIP3/FYN/BTK/MAPK1	5
BP	GO:0050890	cognition	6/69	306/18800	0.000897772	0.00345938	0.00162676	KIT/FYN/HLA-DRA/TNF/MAPK1/MDK	6
BP	GO:0015718	monocarboxylic acid transport	4/69	117/18800	0.000901845	0.0034704	0.00163195	MYC/IL1B/TNF/P2RX4	4
BP	GO:0043281	regulation of cysteine-type endopeptidase activity involved in apoptotic process	5/69	204/18800	0.000916719	0.00351422	0.00165255	CD44/MYC/LCK/TNF/THBS1	5
BP	GO:0002448	mast cell mediated immunity	3/69	52/18800	0.000919369	0.00351422	0.00165255	KIT/RAC2/BTK	3
BP	GO:0002686	negative regulation of leukocyte migration	3/69	52/18800	0.000919369	0.00351422	0.00165255	CXCL12/CCL2/EMILIN1	3
BP	GO:0035196	production of miRNAs involved in gene silencing by miRNA	3/69	52/18800	0.000919369	0.00351422	0.00165255	TGFB1/TP53/TNF	3
BP	GO:1904036	negative regulation of epithelial cell apoptotic process	3/69	52/18800	0.000919369	0.00351422	0.00165255	TNFAIP3/ICAM1/MDK	3
BP	GO:0030278	regulation of ossification	4/69	118/18800	0.000930928	0.00355366	0.0016711	TGFB1/CSF1/MAPK1/MDK	4
BP	GO:0045471	response to ethanol	4/69	119/18800	0.000960666	0.00365743	0.00171989	MYC/CD14/FYN/TNF	4
BP	GO:2000278	regulation of DNA biosynthetic process	4/69	119/18800	0.000960666	0.00365743	0.00171989	MYC/TP53/TNF/MAPK1	4
BP	GO:0002931	response to ischemia	3/69	53/18800	0.000971982	0.0036907	0.00173554	TP53/CSF1/P2RX4	3
BP	GO:0010718	positive regulation of epithelial to mesenchymal transition	3/69	53/18800	0.000971982	0.0036907	0.00173554	TGFB1/IL1B/MDK	3
BP	GO:0050804	modulation of chemical synaptic transmission	7/69	429/18800	0.000978901	0.00371204	0.00174558	KIT/FYN/IL1B/CCL2/TYROBP/TNF/MAPK1	7
BP	GO:0099177	regulation of trans-synaptic signaling	7/69	430/18800	0.000992234	0.00375763	0.00176701	KIT/FYN/IL1B/CCL2/TYROBP/TNF/MAPK1	7
BP	GO:0002664	regulation of T cell tolerance induction	2/69	13/18800	0.00100881	0.00378536	0.00178005	CD3E/IL2RA	2
BP	GO:0010623	programmed cell death involved in cell development	2/69	13/18800	0.00100881	0.00378536	0.00178005	KIT/IL1B	2
BP	GO:0031392	regulation of prostaglandin biosynthetic process	2/69	13/18800	0.00100881	0.00378536	0.00178005	CD74/IL1B	2
BP	GO:0032621	interleukin-18 production	2/69	13/18800	0.00100881	0.00378536	0.00178005	TLR9/TNF	2
BP	GO:0032661	regulation of interleukin-18 production	2/69	13/18800	0.00100881	0.00378536	0.00178005	TLR9/TNF	2
BP	GO:0072683	T cell extravasation	2/69	13/18800	0.00100881	0.00378536	0.00178005	CCL2/ICAM1	2
BP	GO:1901862	negative regulation of muscle tissue development	2/69	13/18800	0.00100881	0.00378536	0.00178005	TGFB1/IGFBP5	2
BP	GO:0010524	positive regulation of calcium ion transport into cytosol	3/69	54/18800	0.00102647	0.00384153	0.00180647	CD19/CXCL10/P2RX4	3
BP	GO:0045661	regulation of myoblast differentiation	3/69	54/18800	0.00102647	0.00384153	0.00180647	TGFB1/CXCL10/TNF	3
BP	GO:0010811	positive regulation of cell-substrate adhesion	4/69	122/18800	0.00105389	0.00393902	0.00185231	CD3E/CSF1/EMILIN1/MDK	4
BP	GO:0050679	positive regulation of epithelial cell proliferation	5/69	211/18800	0.00106573	0.00397809	0.00187068	TNFAIP3/MYC/CXCL12/TNF/MDK	5
BP	GO:0010518	positive regulation of phospholipase activity	3/69	55/18800	0.00108285	0.00403145	0.00189578	KIT/CD86/CCL5	3
BP	GO:1904645	response to amyloid-beta	3/69	55/18800	0.00108285	0.00403145	0.00189578	FYN/ICAM1/TNF	3
BP	GO:0001952	regulation of cell-matrix adhesion	4/69	123/18800	0.00108633	0.00403917	0.00189941	CD3E/CSF1/THBS1/PTK2	4
BP	GO:0009314	response to radiation	7/69	438/18800	0.00110415	0.00410009	0.00192805	MYC/CXCL12/TP53/KIT/PTPRC/CXCL10/TNF	7
BP	GO:0070918	production of small RNA involved in gene silencing by RNA	3/69	56/18800	0.00114115	0.004232	0.00199008	TGFB1/TP53/TNF	3
BP	GO:0002467	germinal center formation	2/69	14/18800	0.00117416	0.00428777	0.00201631	TNFAIP3/TNFSF13B	2
BP	GO:0002756	MyD88-independent toll-like receptor signaling pathway	2/69	14/18800	0.00117416	0.00428777	0.00201631	IRF7/CD40	2
BP	GO:0002829	negative regulation of type 2 immune response	2/69	14/18800	0.00117416	0.00428777	0.00201631	TBX21/STAT6	2
BP	GO:0030213	hyaluronan biosynthetic process	2/69	14/18800	0.00117416	0.00428777	0.00201631	TGFB1/IL1B	2
BP	GO:0032306	regulation of prostaglandin secretion	2/69	14/18800	0.00117416	0.00428777	0.00201631	IL1B/P2RX4	2
BP	GO:0032308	positive regulation of prostaglandin secretion	2/69	14/18800	0.00117416	0.00428777	0.00201631	IL1B/P2RX4	2
BP	GO:0045579	positive regulation of B cell differentiation	2/69	14/18800	0.00117416	0.00428777	0.00201631	BTK/INPP5D	2
BP	GO:0050930	induction of positive chemotaxis	2/69	14/18800	0.00117416	0.00428777	0.00201631	CXCL8/CXCL12	2
BP	GO:0061043	regulation of vascular wound healing	2/69	14/18800	0.00117416	0.00428777	0.00201631	TNFAIP3/TNF	2
BP	GO:0071801	regulation of podosome assembly	2/69	14/18800	0.00117416	0.00428777	0.00201631	HCK/TNF	2
BP	GO:0098760	response to interleukin-7	2/69	14/18800	0.00117416	0.00428777	0.00201631	IL7R/BTK	2
BP	GO:0098761	cellular response to interleukin-7	2/69	14/18800	0.00117416	0.00428777	0.00201631	IL7R/BTK	2
BP	GO:0001961	positive regulation of cytokine-mediated signaling pathway	3/69	57/18800	0.0012014	0.00437052	0.00205522	IRF7/CD74/CSF1	3
BP	GO:0032608	interferon-beta production	3/69	57/18800	0.0012014	0.00437052	0.00205522	IRF1/IRF7/TLR9	3
BP	GO:0032648	regulation of interferon-beta production	3/69	57/18800	0.0012014	0.00437052	0.00205522	IRF1/IRF7/TLR9	3
BP	GO:0051651	maintenance of location in cell	5/69	219/18800	0.00125729	0.00456804	0.00214811	CD19/LCK/PTPRC/PTPN6/CXCL10	5
BP	GO:0003012	muscle system process	7/69	449/18800	0.00127401	0.00461708	0.00217117	TNFRSF1B/IGFBP5/KIT/IL1B/TNF/AIF1/P2RX4	7
BP	GO:0048568	embryonic organ development	7/69	449/18800	0.00127401	0.00461708	0.00217117	CXCL8/TGFB1/TP53/KIT/TNF/MAPK1/RARRES2	7
BP	GO:0060562	epithelial tube morphogenesis	6/69	328/18800	0.00128295	0.0046436	0.00218364	MYC/TGFB1/CSF1/CXCL10/TNF/MDK	6
BP	GO:0002218	activation of innate immune response	3/69	59/18800	0.00132783	0.00478186	0.00224865	FYN/HCK/TYROBP	3
BP	GO:0010574	regulation of vascular endothelial growth factor production	3/69	59/18800	0.00132783	0.00478186	0.00224865	TGFB1/IL1B/C3AR1	3
BP	GO:0043666	regulation of phosphoprotein phosphatase activity	3/69	59/18800	0.00132783	0.00478186	0.00224865	PTPRC/TNF/LGALS3	3
BP	GO:0051785	positive regulation of nuclear division	3/69	59/18800	0.00132783	0.00478186	0.00224865	CD28/IL1B/TNF	3
BP	GO:0017015	regulation of transforming growth factor beta receptor signaling pathway	4/69	130/18800	0.00133332	0.00478357	0.00224946	TGFB1/TP53/THBS1/EMILIN1	4
BP	GO:0035303	regulation of dephosphorylation	4/69	130/18800	0.00133332	0.00478357	0.00224946	TGFB1/PTPRC/TNF/LGALS3	4
BP	GO:0048565	digestive tract development	4/69	130/18800	0.00133332	0.00478357	0.00224946	CXCL8/KIT/TNF/RARRES2	4
BP	GO:0002517	T cell tolerance induction	2/69	15/18800	0.00135159	0.00481293	0.00226326	CD3E/IL2RA	2
BP	GO:0032725	positive regulation of granulocyte macrophage colony-stimulating factor production	2/69	15/18800	0.00135159	0.00481293	0.00226326	TLR9/IL1B	2
BP	GO:0032905	transforming growth factor beta1 production	2/69	15/18800	0.00135159	0.00481293	0.00226326	TYROBP/THBS1	2
BP	GO:0043518	negative regulation of DNA damage response, signal transduction by p53 class mediator	2/69	15/18800	0.00135159	0.00481293	0.00226326	CD44/CD74	2
BP	GO:1902166	negative regulation of intrinsic apoptotic signaling pathway in response to DNA damage by p53 class mediator	2/69	15/18800	0.00135159	0.00481293	0.00226326	CD44/CD74	2
BP	GO:2001279	regulation of unsaturated fatty acid biosynthetic process	2/69	15/18800	0.00135159	0.00481293	0.00226326	CD74/IL1B	2
BP	GO:0010595	positive regulation of endothelial cell migration	4/69	131/18800	0.00137154	0.00487793	0.00229383	TGFB1/CD40/THBS1/P2RX4	4
BP	GO:0002753	cytoplasmic pattern recognition receptor signaling pathway	3/69	60/18800	0.00139406	0.00495186	0.0023286	TNFAIP3/IRF7/NFKBIA	3
BP	GO:0032874	positive regulation of stress-activated MAPK cascade	4/69	132/18800	0.00141053	0.00500415	0.00235318	TLR9/IL1B/SPI1/TNF	4
BP	GO:0000082	G1/S transition of mitotic cell cycle	5/69	225/18800	0.00141686	0.00501418	0.0023579	MYC/TP53/CCL2/PTPN6/AIF1	5
BP	GO:0060348	bone development	5/69	225/18800	0.00141686	0.00501418	0.0023579	TP53/KIT/PTPRC/PTPN6/TYROBP	5
BP	GO:0003158	endothelium development	4/69	133/18800	0.00145028	0.0051135	0.00240461	IL1B/ICAM1/CXCL10/TNF	4
BP	GO:0061041	regulation of wound healing	4/69	133/18800	0.00145028	0.0051135	0.00240461	TNFAIP3/TNF/THBS1/PTK2	4
BP	GO:1903844	regulation of cellular response to transforming growth factor beta stimulus	4/69	133/18800	0.00145028	0.0051135	0.00240461	TGFB1/TP53/THBS1/EMILIN1	4
BP	GO:0048524	positive regulation of viral process	3/69	61/18800	0.00146234	0.00513702	0.00241567	CD28/CD74/CCL5	3
BP	GO:0050994	regulation of lipid catabolic process	3/69	61/18800	0.00146234	0.00513702	0.00241567	IL1B/TNF/RARRES2	3
BP	GO:2001244	positive regulation of intrinsic apoptotic signaling pathway	3/69	61/18800	0.00146234	0.00513702	0.00241567	MYC/TP53/LCK	3
BP	GO:0001889	liver development	4/69	134/18800	0.00149081	0.00522424	0.00245668	TNFAIP3/MYC/TNF/MDK	4
BP	GO:0070304	positive regulation of stress-activated protein kinase signaling cascade	4/69	134/18800	0.00149081	0.00522424	0.00245668	TLR9/IL1B/SPI1/TNF	4
BP	GO:0030879	mammary gland development	4/69	135/18800	0.00153213	0.00533485	0.0025087	STAT6/IGFBP5/CSF1/MAPK1	4
BP	GO:0043030	regulation of macrophage activation	3/69	62/18800	0.00153268	0.00533485	0.0025087	CD74/PTPRC/THBS1	3
BP	GO:0031649	heat generation	2/69	16/18800	0.00154101	0.00533485	0.0025087	IL1B/TNF	2
BP	GO:0034349	glial cell apoptotic process	2/69	16/18800	0.00154101	0.00533485	0.0025087	TP53/CCL2	2
BP	GO:0045651	positive regulation of macrophage differentiation	2/69	16/18800	0.00154101	0.00533485	0.0025087	TGFB1/CSF1	2
BP	GO:0045779	negative regulation of bone resorption	2/69	16/18800	0.00154101	0.00533485	0.0025087	TNFAIP3/INPP5D	2
BP	GO:0048266	behavioral response to pain	2/69	16/18800	0.00154101	0.00533485	0.0025087	THBS1/P2RX4	2
BP	GO:0070431	nucleotide-binding oligomerization domain containing 2 signaling pathway	2/69	16/18800	0.00154101	0.00533485	0.0025087	TNFAIP3/NFKBIA	2
BP	GO:1901201	regulation of extracellular matrix assembly	2/69	16/18800	0.00154101	0.00533485	0.0025087	TGFB1/EMILIN1	2
BP	GO:1903975	regulation of glial cell migration	2/69	16/18800	0.00154101	0.00533485	0.0025087	CSF1/P2RX4	2
BP	GO:0001933	negative regulation of protein phosphorylation	6/69	341/18800	0.0015636	0.00540651	0.00254239	TNFAIP3/TGFB1/IL1B/PTPRC/PTPN6/EMILIN1	6
BP	GO:0062012	regulation of small molecule metabolic process	6/69	342/18800	0.00158698	0.00548074	0.0025773	MYC/TP53/KIT/CD74/IL1B/TNF	6
BP	GO:0061008	hepaticobiliary system development	4/69	137/18800	0.00161714	0.00557815	0.00262311	TNFAIP3/MYC/TNF/MDK	4
BP	GO:0045732	positive regulation of protein catabolic process	5/69	233/18800	0.00165229	0.00569256	0.00267691	TNFAIP3/TNFRSF1B/IL1B/TNF/PTK2	5
BP	GO:0001885	endothelial cell development	3/69	64/18800	0.00167965	0.0057591	0.00270819	IL1B/ICAM1/TNF	3
BP	GO:0009620	response to fungus	3/69	64/18800	0.00167965	0.0057591	0.00270819	BTK/SPI1/RARRES2	3
BP	GO:0048247	lymphocyte chemotaxis	3/69	64/18800	0.00167965	0.0057591	0.00270819	CCL2/CCL5/CXCL10	3
BP	GO:0060760	positive regulation of response to cytokine stimulus	3/69	64/18800	0.00167965	0.0057591	0.00270819	IRF7/CD74/CSF1	3
BP	GO:0097305	response to alcohol	5/69	235/18800	0.00171539	0.005848	0.00275	MYC/TGFB1/CD14/FYN/TNF	5
BP	GO:0002295	T-helper cell lineage commitment	2/69	17/18800	0.00174235	0.005848	0.00275	TBX21/STAT6	2
BP	GO:0002830	positive regulation of type 2 immune response	2/69	17/18800	0.00174235	0.005848	0.00275	CD74/CD86	2
BP	GO:0010819	regulation of T cell chemotaxis	2/69	17/18800	0.00174235	0.005848	0.00275	CCL5/CXCL10	2
BP	GO:0010934	macrophage cytokine production	2/69	17/18800	0.00174235	0.005848	0.00275	TGFB1/CD74	2
BP	GO:0010935	regulation of macrophage cytokine production	2/69	17/18800	0.00174235	0.005848	0.00275	TGFB1/CD74	2
BP	GO:0032310	prostaglandin secretion	2/69	17/18800	0.00174235	0.005848	0.00275	IL1B/P2RX4	2
BP	GO:0032604	granulocyte macrophage colony-stimulating factor production	2/69	17/18800	0.00174235	0.005848	0.00275	TLR9/IL1B	2
BP	GO:0032645	regulation of granulocyte macrophage colony-stimulating factor production	2/69	17/18800	0.00174235	0.005848	0.00275	TLR9/IL1B	2
BP	GO:0033631	cell-cell adhesion mediated by integrin	2/69	17/18800	0.00174235	0.005848	0.00275	CD3E/CCL5	2
BP	GO:0035855	megakaryocyte development	2/69	17/18800	0.00174235	0.005848	0.00275	KIT/PTPN6	2
BP	GO:0046325	negative regulation of glucose import	2/69	17/18800	0.00174235	0.005848	0.00275	MYC/TNF	2
BP	GO:0051770	positive regulation of nitric-oxide synthase biosynthetic process	2/69	17/18800	0.00174235	0.005848	0.00275	TLR9/CCL2	2
BP	GO:0090594	inflammatory response to wounding	2/69	17/18800	0.00174235	0.005848	0.00275	TGFB1/MDK	2
BP	GO:0097067	cellular response to thyroid hormone stimulus	2/69	17/18800	0.00174235	0.005848	0.00275	KIT/CTSS	2
BP	GO:1901550	regulation of endothelial cell development	2/69	17/18800	0.00174235	0.005848	0.00275	IL1B/TNF	2
BP	GO:1902165	regulation of intrinsic apoptotic signaling pathway in response to DNA damage by p53 class mediator	2/69	17/18800	0.00174235	0.005848	0.00275	CD44/CD74	2
BP	GO:1903140	regulation of establishment of endothelial barrier	2/69	17/18800	0.00174235	0.005848	0.00275	IL1B/TNF	2
BP	GO:1903305	regulation of regulated secretory pathway	4/69	140/18800	0.00175073	0.0058674	0.00275913	RAC2/SPI1/ITGAM/ITGB2	4
BP	GO:0003170	heart valve development	3/69	65/18800	0.00175633	0.0058674	0.00275913	TNFRSF1B/TGFB1/EMILIN1	3
BP	GO:0031100	animal organ regeneration	3/69	65/18800	0.00175633	0.0058674	0.00275913	MYC/CXCL12/TNF	3
BP	GO:1905330	regulation of morphogenesis of an epithelium	3/69	65/18800	0.00175633	0.0058674	0.00275913	CXCL10/TNF/MDK	3
BP	GO:0045727	positive regulation of translation	4/69	141/18800	0.00179692	0.005996	0.0028196	CD28/CCL5/TNF/THBS1	4
BP	GO:0010517	regulation of phospholipase activity	3/69	66/18800	0.00183516	0.00611648	0.00287625	KIT/CD86/CCL5	3
BP	GO:0009991	response to extracellular stimulus	7/69	479/18800	0.00184301	0.00612436	0.00287996	TP53/CD68/PTPRC/CXCL10/TNF/AIF1/MAPK1	7
BP	GO:0010212	response to ionizing radiation	4/69	142/18800	0.00184394	0.00612436	0.00287996	MYC/TP53/PTPRC/CXCL10	4
BP	GO:0055123	digestive system development	4/69	142/18800	0.00184394	0.00612436	0.00287996	CXCL8/KIT/TNF/RARRES2	4
BP	GO:0001667	ameboidal-type cell migration	7/69	480/18800	0.0018649	0.00618681	0.00290932	TGFB1/CD40/KIT/TNF/THBS1/PTK2/P2RX4	7
BP	GO:2001056	positive regulation of cysteine-type endopeptidase activity	4/69	143/18800	0.00189181	0.00626881	0.00294789	MYC/LCK/FYN/TNF	4
BP	GO:0002693	positive regulation of cellular extravasation	2/69	18/18800	0.0019555	0.0063911	0.00300539	ICAM1/MDK	2
BP	GO:0002827	positive regulation of T-helper 1 type immune response	2/69	18/18800	0.0019555	0.0063911	0.00300539	TBX21/IL1B	2
BP	GO:0008340	determination of adult lifespan	2/69	18/18800	0.0019555	0.0063911	0.00300539	TP53/INPP5D	2
BP	GO:0030730	sequestering of triglyceride	2/69	18/18800	0.0019555	0.0063911	0.00300539	IL1B/TNF	2
BP	GO:0032026	response to magnesium ion	2/69	18/18800	0.0019555	0.0063911	0.00300539	CD14/THBS1	2
BP	GO:0034138	toll-like receptor 3 signaling pathway	2/69	18/18800	0.0019555	0.0063911	0.00300539	TNFAIP3/TNF	2
BP	GO:0046851	negative regulation of bone remodeling	2/69	18/18800	0.0019555	0.0063911	0.00300539	TNFAIP3/INPP5D	2
BP	GO:0048535	lymph node development	2/69	18/18800	0.0019555	0.0063911	0.00300539	IL7R/TGFB1	2
BP	GO:0072567	chemokine (C-X-C motif) ligand 2 production	2/69	18/18800	0.0019555	0.0063911	0.00300539	CD74/TNF	2
BP	GO:0150078	positive regulation of neuroinflammatory response	2/69	18/18800	0.0019555	0.0063911	0.00300539	IL1B/TNF	2
BP	GO:0150079	negative regulation of neuroinflammatory response	2/69	18/18800	0.0019555	0.0063911	0.00300539	TNFRSF1B/PTPRC	2
BP	GO:2000341	regulation of chemokine (C-X-C motif) ligand 2 production	2/69	18/18800	0.0019555	0.0063911	0.00300539	CD74/TNF	2
BP	GO:0060193	positive regulation of lipase activity	3/69	68/18800	0.00199937	0.00651959	0.00306582	KIT/CD86/CCL5	3
BP	GO:0061180	mammary gland epithelium development	3/69	68/18800	0.00199937	0.00651959	0.00306582	STAT6/CSF1/MAPK1	3
BP	GO:0046718	viral entry into host cell	4/69	146/18800	0.00204059	0.00663887	0.0031219	CD74/CD86/MRC1/ICAM1	4
BP	GO:0062013	positive regulation of small molecule metabolic process	4/69	146/18800	0.00204059	0.00663887	0.0031219	MYC/CD74/IL1B/TNF	4
BP	GO:0031668	cellular response to extracellular stimulus	5/69	245/18800	0.0020578	0.00668727	0.00314466	TP53/CD68/PTPRC/AIF1/MAPK1	5
BP	GO:0050922	negative regulation of chemotaxis	3/69	69/18800	0.0020848	0.00676732	0.00318231	CCL2/AIF1/THBS1	3
BP	GO:0034614	cellular response to reactive oxygen species	4/69	147/18800	0.00209193	0.00678278	0.00318958	STAT6/TNFAIP3/BTK/MAPK1	4
BP	GO:2001020	regulation of response to DNA damage stimulus	5/69	246/18800	0.00209459	0.00678374	0.00319003	CD44/MYC/CXCL12/TP53/CD74	5
BP	GO:1904064	positive regulation of cation transmembrane transport	4/69	148/18800	0.00214416	0.0069364	0.00326182	CD19/CCL2/CTSS/CXCL10	4
BP	GO:0071260	cellular response to mechanical stimulus	3/69	70/18800	0.00217246	0.00699827	0.00329091	IRF1/CD40/IL1B	3
BP	GO:0002523	leukocyte migration involved in inflammatory response	2/69	19/18800	0.00218039	0.00699827	0.00329091	TNF/MDK	2
BP	GO:0015732	prostaglandin transport	2/69	19/18800	0.00218039	0.00699827	0.00329091	IL1B/P2RX4	2
BP	GO:0035743	CD4-positive, alpha-beta T cell cytokine production	2/69	19/18800	0.00218039	0.00699827	0.00329091	TBX21/IL1B	2
BP	GO:0043652	engulfment of apoptotic cell	2/69	19/18800	0.00218039	0.00699827	0.00329091	RAC2/THBS1	2
BP	GO:0071800	podosome assembly	2/69	19/18800	0.00218039	0.00699827	0.00329091	HCK/TNF	2
BP	GO:2001185	regulation of CD8-positive, alpha-beta T cell activation	2/69	19/18800	0.00218039	0.00699827	0.00329091	IRF1/CD274	2
BP	GO:0016525	negative regulation of angiogenesis	4/69	149/18800	0.00219728	0.00704458	0.00331269	CXCL10/TNF/THBS1/EMILIN1	4
BP	GO:0090257	regulation of muscle system process	5/69	250/18800	0.0022466	0.00719466	0.00338326	TNFRSF1B/IGFBP5/KIT/AIF1/P2RX4	5
BP	GO:0030902	hindbrain development	4/69	150/18800	0.0022513	0.00720165	0.00338655	CD3E/TP53/AIF1/MDK	4
BP	GO:0014743	regulation of muscle hypertrophy	3/69	71/18800	0.00226239	0.00722904	0.00339943	TNFRSF1B/IGFBP5/P2RX4	3
BP	GO:0007178	transmembrane receptor protein serine/threonine kinase signaling pathway	6/69	368/18800	0.00229412	0.00732227	0.00344327	TGFB1/TP53/SPI1/THBS1/EMILIN1/PTK2	6
BP	GO:2000181	negative regulation of blood vessel morphogenesis	4/69	151/18800	0.00230624	0.00735274	0.0034576	CXCL10/TNF/THBS1/EMILIN1	4
BP	GO:0030330	DNA damage response, signal transduction by p53 class mediator	3/69	72/18800	0.0023546	0.00749023	0.00352225	CD44/TP53/CD74	3
BP	GO:1903036	positive regulation of response to wounding	3/69	72/18800	0.0023546	0.00749023	0.00352225	THBS1/PTK2/MDK	3
BP	GO:1901343	negative regulation of vasculature development	4/69	152/18800	0.00236209	0.00750573	0.00352955	CXCL10/TNF/THBS1/EMILIN1	4
BP	GO:0010310	regulation of hydrogen peroxide metabolic process	2/69	20/18800	0.00241692	0.00761851	0.00358258	FYN/RAC2	2
BP	GO:0032495	response to muramyl dipeptide	2/69	20/18800	0.00241692	0.00761851	0.00358258	TNFAIP3/NFKBIA	2
BP	GO:0042053	regulation of dopamine metabolic process	2/69	20/18800	0.00241692	0.00761851	0.00358258	ITGAM/ITGB2	2
BP	GO:0042069	regulation of catecholamine metabolic process	2/69	20/18800	0.00241692	0.00761851	0.00358258	ITGAM/ITGB2	2
BP	GO:0043373	CD4-positive, alpha-beta T cell lineage commitment	2/69	20/18800	0.00241692	0.00761851	0.00358258	TBX21/STAT6	2
BP	GO:0070233	negative regulation of T cell apoptotic process	2/69	20/18800	0.00241692	0.00761851	0.00358258	IL7R/CCL5	2
BP	GO:2000010	positive regulation of protein localization to cell surface	2/69	20/18800	0.00241692	0.00761851	0.00358258	TYROBP/TNF	2
BP	GO:0048754	branching morphogenesis of an epithelial tube	4/69	153/18800	0.00241887	0.00761851	0.00358258	MYC/CSF1/TNF/MDK	4
BP	GO:0044843	cell cycle G1/S phase transition	5/69	255/18800	0.00244776	0.00767993	0.00361146	MYC/TP53/CCL2/PTPN6/AIF1	5
BP	GO:0033555	multicellular organismal response to stress	3/69	73/18800	0.0024491	0.00767993	0.00361146	THBS1/MDK/P2RX4	3
BP	GO:0048662	negative regulation of smooth muscle cell proliferation	3/69	73/18800	0.0024491	0.00767993	0.00361146	TNFAIP3/IGFBP5/AIF1	3
BP	GO:2000573	positive regulation of DNA biosynthetic process	3/69	73/18800	0.0024491	0.00767993	0.00361146	MYC/TNF/MAPK1	3
BP	GO:0061515	myeloid cell development	3/69	74/18800	0.00254593	0.00797483	0.00375013	KIT/PTPN6/TYROBP	3
BP	GO:0030900	forebrain development	6/69	376/18800	0.00255341	0.00798952	0.00375705	MYC/CXCL12/FYN/ITGAM/TYROBP/MDK	6
BP	GO:0045685	regulation of glial cell differentiation	3/69	75/18800	0.00264509	0.0082308	0.0038705	TNFRSF1B/TGFB1/MDK	3
BP	GO:0050848	regulation of calcium-mediated signaling	3/69	75/18800	0.00264509	0.0082308	0.0038705	CD3E/TNF/P2RX4	3
BP	GO:0061448	connective tissue development	5/69	260/18800	0.00266172	0.0082308	0.0038705	CD44/TGFB1/CSF1/SPI1/MDK	5
BP	GO:0002902	regulation of B cell apoptotic process	2/69	21/18800	0.00266502	0.0082308	0.0038705	CD74/BTK	2
BP	GO:0007252	I-kappaB phosphorylation	2/69	21/18800	0.00266502	0.0082308	0.0038705	TLR9/TNF	2
BP	GO:0032305	positive regulation of icosanoid secretion	2/69	21/18800	0.00266502	0.0082308	0.0038705	IL1B/P2RX4	2
BP	GO:0032727	positive regulation of interferon-alpha production	2/69	21/18800	0.00266502	0.0082308	0.0038705	IRF7/TLR9	2
BP	GO:0045063	T-helper 1 cell differentiation	2/69	21/18800	0.00266502	0.0082308	0.0038705	TBX21/STAT6	2
BP	GO:0051767	nitric-oxide synthase biosynthetic process	2/69	21/18800	0.00266502	0.0082308	0.0038705	TLR9/CCL2	2
BP	GO:0051769	regulation of nitric-oxide synthase biosynthetic process	2/69	21/18800	0.00266502	0.0082308	0.0038705	TLR9/CCL2	2
BP	GO:0061760	antifungal innate immune response	2/69	21/18800	0.00266502	0.0082308	0.0038705	SPI1/RARRES2	2
BP	GO:0071404	cellular response to low-density lipoprotein particle stimulus	2/69	21/18800	0.00266502	0.0082308	0.0038705	FCER1G/ITGB2	2
BP	GO:0001937	negative regulation of endothelial cell proliferation	3/69	76/18800	0.00274662	0.00847367	0.00398471	CCL2/TNF/THBS1	3
BP	GO:0042326	negative regulation of phosphorylation	6/69	382/18800	0.00276193	0.00850259	0.00399831	TNFAIP3/TGFB1/IL1B/PTPRC/PTPN6/EMILIN1	6
BP	GO:0050878	regulation of body fluid levels	6/69	382/18800	0.00276193	0.00850259	0.00399831	CD40LG/CD40/LCK/PTPN6/FCER1G/THBS1	6
BP	GO:2000045	regulation of G1/S transition of mitotic cell cycle	4/69	160/18800	0.0028429	0.00874245	0.00411111	TP53/CCL2/PTPN6/AIF1	4
BP	GO:0043154	negative regulation of cysteine-type endopeptidase activity involved in apoptotic process	3/69	77/18800	0.00285052	0.00875646	0.0041177	CD44/TNF/THBS1	3
BP	GO:0050806	positive regulation of synaptic transmission	4/69	161/18800	0.00290736	0.00885106	0.00416218	CCL2/TYROBP/TNF/MAPK1	4
BP	GO:0002223	stimulatory C-type lectin receptor signaling pathway	2/69	22/18800	0.00292459	0.00885106	0.00416218	FYN/TYROBP	2
BP	GO:0002320	lymphoid progenitor cell differentiation	2/69	22/18800	0.00292459	0.00885106	0.00416218	KIT/SPI1	2
BP	GO:0002363	alpha-beta T cell lineage commitment	2/69	22/18800	0.00292459	0.00885106	0.00416218	TBX21/STAT6	2
BP	GO:0010888	negative regulation of lipid storage	2/69	22/18800	0.00292459	0.00885106	0.00416218	NFKBIA/TNF	2
BP	GO:0032303	regulation of icosanoid secretion	2/69	22/18800	0.00292459	0.00885106	0.00416218	IL1B/P2RX4	2
BP	GO:0032780	negative regulation of ATPase activity	2/69	22/18800	0.00292459	0.00885106	0.00416218	TP53/TLR9	2
BP	GO:0032891	negative regulation of organic acid transport	2/69	22/18800	0.00292459	0.00885106	0.00416218	TNF/THBS1	2
BP	GO:0034104	negative regulation of tissue remodeling	2/69	22/18800	0.00292459	0.00885106	0.00416218	TNFAIP3/INPP5D	2
BP	GO:0043369	CD4-positive or CD8-positive, alpha-beta T cell lineage commitment	2/69	22/18800	0.00292459	0.00885106	0.00416218	TBX21/STAT6	2
BP	GO:0044346	fibroblast apoptotic process	2/69	22/18800	0.00292459	0.00885106	0.00416218	MYC/TP53	2
BP	GO:0048714	positive regulation of oligodendrocyte differentiation	2/69	22/18800	0.00292459	0.00885106	0.00416218	TNFRSF1B/MDK	2
BP	GO:0061042	vascular wound healing	2/69	22/18800	0.00292459	0.00885106	0.00416218	TNFAIP3/TNF	2
BP	GO:0061081	positive regulation of myeloid leukocyte cytokine production involved in immune response	2/69	22/18800	0.00292459	0.00885106	0.00416218	KIT/CD74	2
BP	GO:0010827	regulation of glucose transmembrane transport	3/69	78/18800	0.00295681	0.00892969	0.00419915	MYC/IL1B/TNF	3
BP	GO:0043537	negative regulation of blood vessel endothelial cell migration	3/69	78/18800	0.00295681	0.00892969	0.00419915	TGFB1/TNF/THBS1	3
BP	GO:0034767	positive regulation of ion transmembrane transport	4/69	163/18800	0.00303928	0.00915944	0.0043072	CD19/CCL2/CTSS/CXCL10	4
BP	GO:0050680	negative regulation of epithelial cell proliferation	4/69	163/18800	0.00303928	0.00915944	0.0043072	TGFB1/CCL2/TNF/THBS1	4
BP	GO:0032418	lysosome localization	3/69	79/18800	0.00306552	0.00919013	0.00432162	KIT/RAC2/BTK	3
BP	GO:0048145	regulation of fibroblast proliferation	3/69	79/18800	0.00306552	0.00919013	0.00432162	MYC/TP53/CD74	3
BP	GO:0048708	astrocyte differentiation	3/69	79/18800	0.00306552	0.00919013	0.00432162	IL1B/TNF/MAPK1	3
BP	GO:1903556	negative regulation of tumor necrosis factor superfamily cytokine production	3/69	79/18800	0.00306552	0.00919013	0.00432162	TNFAIP3/CD274/PTPN6	3
BP	GO:1990849	maintenance of vacuolar location	3/69	79/18800	0.00306552	0.00919013	0.00432162	KIT/RAC2/BTK	3
BP	GO:0051348	negative regulation of transferase activity	5/69	270/18800	0.00312998	0.00937356	0.00440789	TNFAIP3/TP53/IL1B/PTPRC/PTPN6	5
BP	GO:0051279	regulation of release of sequestered calcium ion into cytosol	3/69	80/18800	0.00317665	0.0095034	0.00446894	CD19/PTPN6/CXCL10	3
BP	GO:0032693	negative regulation of interleukin-10 production	2/69	23/18800	0.00319555	0.00952014	0.00447681	CD274/TYROBP	2
BP	GO:0045723	positive regulation of fatty acid biosynthetic process	2/69	23/18800	0.00319555	0.00952014	0.00447681	CD74/IL1B	2
BP	GO:0060353	regulation of cell adhesion molecule production	2/69	23/18800	0.00319555	0.00952014	0.00447681	CXCL8/IL1B	2
BP	GO:1902254	negative regulation of intrinsic apoptotic signaling pathway by p53 class mediator	2/69	23/18800	0.00319555	0.00952014	0.00447681	CD44/CD74	2
BP	GO:0001894	tissue homeostasis	5/69	272/18800	0.00323033	0.00961377	0.00452084	TNFAIP3/TLR9/CSF1/INPP5D/P2RX4	5
BP	GO:0042176	regulation of protein catabolic process	6/69	395/18800	0.00325744	0.00968437	0.00455404	TNFAIP3/TNFRSF1B/FYN/IL1B/TNF/PTK2	6
BP	GO:0045445	myoblast differentiation	3/69	81/18800	0.00329024	0.0097616	0.00459036	TGFB1/CXCL10/TNF	3
BP	GO:0048144	fibroblast proliferation	3/69	81/18800	0.00329024	0.0097616	0.00459036	MYC/TP53/CD74	3
BP	GO:0034250	positive regulation of cellular amide metabolic process	4/69	167/18800	0.0033153	0.00982579	0.00462055	CD28/CCL5/TNF/THBS1	4
BP	GO:2001021	negative regulation of response to DNA damage stimulus	3/69	82/18800	0.00340629	0.010085	0.00474244	CD44/CXCL12/CD74	3
BP	GO:0002082	regulation of oxidative phosphorylation	2/69	24/18800	0.00347782	0.0102123	0.0048023	MYC/TNF	2
BP	GO:0035994	response to muscle stretch	2/69	24/18800	0.00347782	0.0102123	0.0048023	NFKBIA/PTK2	2
BP	GO:0036120	cellular response to platelet-derived growth factor stimulus	2/69	24/18800	0.00347782	0.0102123	0.0048023	MYC/FYN	2
BP	GO:0038095	Fc-epsilon receptor signaling pathway	2/69	24/18800	0.00347782	0.0102123	0.0048023	BTK/FCER1G	2
BP	GO:0045649	regulation of macrophage differentiation	2/69	24/18800	0.00347782	0.0102123	0.0048023	TGFB1/CSF1	2
BP	GO:0048143	astrocyte activation	2/69	24/18800	0.00347782	0.0102123	0.0048023	IL1B/TNF	2
BP	GO:2000637	positive regulation of gene silencing by miRNA	2/69	24/18800	0.00347782	0.0102123	0.0048023	TGFB1/TP53	2
BP	GO:2001026	regulation of endothelial cell chemotaxis	2/69	24/18800	0.00347782	0.0102123	0.0048023	THBS1/P2RX4	2
BP	GO:0048678	response to axon injury	3/69	83/18800	0.00352482	0.0103397	0.00486221	TYROBP/AIF1/P2RX4	3
BP	GO:0072331	signal transduction by p53 class mediator	4/69	170/18800	0.00353321	0.0103537	0.0048688	CD44/MYC/TP53/CD74	4
BP	GO:0010921	regulation of phosphatase activity	3/69	84/18800	0.00364585	0.0106729	0.00501888	PTPRC/TNF/LGALS3	3
BP	GO:0046889	positive regulation of lipid biosynthetic process	3/69	85/18800	0.00376939	0.0108734	0.00511316	CD74/IL1B/TNF	3
BP	GO:0071229	cellular response to acid chemical	3/69	85/18800	0.00376939	0.0108734	0.00511316	MYC/FYN/TNF	3
BP	GO:0098586	cellular response to virus	3/69	85/18800	0.00376939	0.0108734	0.00511316	IRF7/CCL5/CXCL10	3
BP	GO:2000117	negative regulation of cysteine-type endopeptidase activity	3/69	85/18800	0.00376939	0.0108734	0.00511316	CD44/TNF/THBS1	3
BP	GO:0001911	negative regulation of leukocyte mediated cytotoxicity	2/69	25/18800	0.0037713	0.0108734	0.00511316	IL7R/PTPRC	2
BP	GO:0031579	membrane raft organization	2/69	25/18800	0.0037713	0.0108734	0.00511316	PTPRC/CD2	2
BP	GO:0036119	response to platelet-derived growth factor	2/69	25/18800	0.0037713	0.0108734	0.00511316	MYC/FYN	2
BP	GO:0043302	positive regulation of leukocyte degranulation	2/69	25/18800	0.0037713	0.0108734	0.00511316	ITGAM/ITGB2	2
BP	GO:0050860	negative regulation of T cell receptor signaling pathway	2/69	25/18800	0.0037713	0.0108734	0.00511316	PTPN6/LGALS3	2
BP	GO:0050927	positive regulation of positive chemotaxis	2/69	25/18800	0.0037713	0.0108734	0.00511316	CXCL8/CXCL12	2
BP	GO:0060148	positive regulation of posttranscriptional gene silencing	2/69	25/18800	0.0037713	0.0108734	0.00511316	TGFB1/TP53	2
BP	GO:0060396	growth hormone receptor signaling pathway	2/69	25/18800	0.0037713	0.0108734	0.00511316	STAT6/PTK2	2
BP	GO:0070423	nucleotide-binding oligomerization domain containing signaling pathway	2/69	25/18800	0.0037713	0.0108734	0.00511316	TNFAIP3/NFKBIA	2
BP	GO:1900370	positive regulation of RNA interference	2/69	25/18800	0.0037713	0.0108734	0.00511316	TGFB1/TP53	2
BP	GO:2000193	positive regulation of fatty acid transport	2/69	25/18800	0.0037713	0.0108734	0.00511316	IL1B/P2RX4	2
BP	GO:0010634	positive regulation of epithelial cell migration	4/69	174/18800	0.00383866	0.0110453	0.00519402	TGFB1/CD40/THBS1/P2RX4	4
BP	GO:0010950	positive regulation of endopeptidase activity	4/69	174/18800	0.00383866	0.0110453	0.00519402	MYC/LCK/FYN/TNF	4
BP	GO:0019915	lipid storage	3/69	86/18800	0.00389547	0.0111975	0.00526559	IL1B/NFKBIA/TNF	3
BP	GO:0001666	response to hypoxia	5/69	286/18800	0.00399905	0.0114837	0.00540019	MYC/CXCL12/TP53/TNF/THBS1	5
BP	GO:0001783	B cell apoptotic process	2/69	26/18800	0.00407593	0.0115424	0.00542778	CD74/BTK	2
BP	GO:0002407	dendritic cell chemotaxis	2/69	26/18800	0.00407593	0.0115424	0.00542778	SPI1/CCL5	2
BP	GO:0002726	positive regulation of T cell cytokine production	2/69	26/18800	0.00407593	0.0115424	0.00542778	TBX21/IL1B	2
BP	GO:0006027	glycosaminoglycan catabolic process	2/69	26/18800	0.00407593	0.0115424	0.00542778	CD44/TGFB1	2
BP	GO:0019883	antigen processing and presentation of endogenous antigen	2/69	26/18800	0.00407593	0.0115424	0.00542778	CD74/HLA-DRA	2
BP	GO:0032515	negative regulation of phosphoprotein phosphatase activity	2/69	26/18800	0.00407593	0.0115424	0.00542778	TNF/LGALS3	2
BP	GO:0033598	mammary gland epithelial cell proliferation	2/69	26/18800	0.00407593	0.0115424	0.00542778	STAT6/MAPK1	2
BP	GO:0035872	nucleotide-binding domain, leucine rich repeat containing receptor signaling pathway	2/69	26/18800	0.00407593	0.0115424	0.00542778	TNFAIP3/NFKBIA	2
BP	GO:0042832	defense response to protozoan	2/69	26/18800	0.00407593	0.0115424	0.00542778	IRF8/CD40	2
BP	GO:0050857	positive regulation of antigen receptor-mediated signaling pathway	2/69	26/18800	0.00407593	0.0115424	0.00542778	LCK/PTPRC	2
BP	GO:0050926	regulation of positive chemotaxis	2/69	26/18800	0.00407593	0.0115424	0.00542778	CXCL8/CXCL12	2
BP	GO:0050995	negative regulation of lipid catabolic process	2/69	26/18800	0.00407593	0.0115424	0.00542778	IL1B/TNF	2
BP	GO:0060352	cell adhesion molecule production	2/69	26/18800	0.00407593	0.0115424	0.00542778	CXCL8/IL1B	2
BP	GO:0060561	apoptotic process involved in morphogenesis	2/69	26/18800	0.00407593	0.0115424	0.00542778	TNFRSF1B/SPI1	2
BP	GO:1903510	mucopolysaccharide metabolic process	3/69	88/18800	0.00415527	0.0117555	0.00552797	CD44/TGFB1/IL1B	3
BP	GO:0044070	regulation of anion transport	3/69	89/18800	0.00428903	0.0120861	0.00568346	IL1B/TNF/P2RX4	3
BP	GO:0051781	positive regulation of cell division	3/69	89/18800	0.00428903	0.0120861	0.00568346	TGFB1/IL1B/MDK	3
BP	GO:0097581	lamellipodium organization	3/69	89/18800	0.00428903	0.0120861	0.00568346	CD44/KIT/RAC2	3
BP	GO:1903578	regulation of ATP metabolic process	3/69	89/18800	0.00428903	0.0120861	0.00568346	MYC/TP53/TNF	3
BP	GO:0002791	regulation of peptide secretion	4/69	180/18800	0.00432971	0.0121887	0.00573171	CD74/IL1B/CCL5/TNF	4
BP	GO:0001562	response to protozoan	2/69	27/18800	0.00439161	0.0122665	0.00576829	IRF8/CD40	2
BP	GO:0002220	innate immune response activating cell surface receptor signaling pathway	2/69	27/18800	0.00439161	0.0122665	0.00576829	FYN/TYROBP	2
BP	GO:0009651	response to salt stress	2/69	27/18800	0.00439161	0.0122665	0.00576829	TP53/TNF	2
BP	GO:0010996	response to auditory stimulus	2/69	27/18800	0.00439161	0.0122665	0.00576829	CXCL10/MDK	2
BP	GO:0032607	interferon-alpha production	2/69	27/18800	0.00439161	0.0122665	0.00576829	IRF7/TLR9	2
BP	GO:0032647	regulation of interferon-alpha production	2/69	27/18800	0.00439161	0.0122665	0.00576829	IRF7/TLR9	2
BP	GO:0036037	CD8-positive, alpha-beta T cell activation	2/69	27/18800	0.00439161	0.0122665	0.00576829	IRF1/CD274	2
BP	GO:1903055	positive regulation of extracellular matrix organization	2/69	27/18800	0.00439161	0.0122665	0.00576829	TGFB1/EMILIN1	2
BP	GO:0060191	regulation of lipase activity	3/69	90/18800	0.00442539	0.0123488	0.00580699	KIT/CD86/CCL5	3
BP	GO:0071375	cellular response to peptide hormone stimulus	5/69	294/18800	0.00449298	0.0125252	0.00588995	STAT6/MYC/IL1B/RARRES2/PTK2	5
BP	GO:0045638	negative regulation of myeloid cell differentiation	3/69	91/18800	0.00456435	0.0127118	0.00597768	MYC/INPP5D/NFKBIA	3
BP	GO:0090087	regulation of peptide transport	4/69	183/18800	0.00459044	0.012772	0.00600601	CD74/IL1B/CCL5/TNF	4
BP	GO:0052548	regulation of endopeptidase activity	6/69	426/18800	0.00470527	0.0130516	0.00613746	CD44/MYC/LCK/FYN/TNF/THBS1	6
BP	GO:1903035	negative regulation of response to wounding	3/69	92/18800	0.00470593	0.0130516	0.00613746	TNF/THBS1/MDK	3
BP	GO:0010800	positive regulation of peptidyl-threonine phosphorylation	2/69	28/18800	0.00471826	0.0130516	0.00613746	TGFB1/MAPK1	2
BP	GO:0010818	T cell chemotaxis	2/69	28/18800	0.00471826	0.0130516	0.00613746	CCL5/CXCL10	2
BP	GO:0031342	negative regulation of cell killing	2/69	28/18800	0.00471826	0.0130516	0.00613746	IL7R/PTPRC	2
BP	GO:0044030	regulation of DNA methylation	2/69	28/18800	0.00471826	0.0130516	0.00613746	MYC/SPI1	2
BP	GO:0061138	morphogenesis of a branching epithelium	4/69	185/18800	0.00477003	0.013182	0.00619881	MYC/CSF1/TNF/MDK	4
BP	GO:0036293	response to decreased oxygen levels	5/69	299/18800	0.00482297	0.0133155	0.00626156	MYC/CXCL12/TP53/TNF/THBS1	5
BP	GO:0030101	natural killer cell activation	3/69	93/18800	0.00485015	0.0133776	0.00629078	PTPRC/TYROBP/CD2	3
BP	GO:0051302	regulation of cell division	4/69	186/18800	0.00486158	0.0133962	0.00629953	MYC/TGFB1/IL1B/MDK	4
BP	GO:0060485	mesenchyme development	5/69	301/18800	0.00495968	0.0136534	0.00642047	MYC/TGFB1/IL1B/MAPK1/MDK	5
BP	GO:0072594	establishment of protein localization to organelle	6/69	431/18800	0.00497718	0.0136884	0.00643694	TNFAIP3/TGFB1/TP53/RAC2/CD68/NFKBIA	6
BP	GO:0031099	regeneration	4/69	188/18800	0.0050482	0.0137986	0.00648876	MYC/CXCL12/TNF/MDK	4
BP	GO:1902806	regulation of cell cycle G1/S phase transition	4/69	188/18800	0.0050482	0.0137986	0.00648876	TP53/CCL2/PTPN6/AIF1	4
BP	GO:0001773	myeloid dendritic cell activation	2/69	29/18800	0.0050558	0.0137986	0.00648876	SPI1/CD2	2
BP	GO:0002313	mature B cell differentiation involved in immune response	2/69	29/18800	0.0050558	0.0137986	0.00648876	IRF8/SPI1	2
BP	GO:0002825	regulation of T-helper 1 type immune response	2/69	29/18800	0.0050558	0.0137986	0.00648876	TBX21/IL1B	2
BP	GO:0048265	response to pain	2/69	29/18800	0.0050558	0.0137986	0.00648876	THBS1/P2RX4	2
BP	GO:0097066	response to thyroid hormone	2/69	29/18800	0.0050558	0.0137986	0.00648876	KIT/CTSS	2
BP	GO:0097421	liver regeneration	2/69	29/18800	0.0050558	0.0137986	0.00648876	MYC/TNF	2
BP	GO:0043433	negative regulation of DNA-binding transcription factor activity	4/69	190/18800	0.00523958	0.0142866	0.00671822	TNFAIP3/TLR9/SPI1/NFKBIA	4
BP	GO:0046330	positive regulation of JNK cascade	3/69	96/18800	0.00529875	0.0144342	0.00678763	TLR9/IL1B/TNF	3
BP	GO:0030198	extracellular matrix organization	5/69	307/18800	0.00538634	0.0146239	0.00687683	TNFRSF1B/TGFB1/CTSS/TNF/EMILIN1	5
BP	GO:0001916	positive regulation of T cell mediated cytotoxicity	2/69	30/18800	0.00540415	0.0146239	0.00687683	PTPRC/HLA-DRA	2
BP	GO:0033198	response to ATP	2/69	30/18800	0.00540415	0.0146239	0.00687683	IL1B/P2RX4	2
BP	GO:0045948	positive regulation of translational initiation	2/69	30/18800	0.00540415	0.0146239	0.00687683	CCL5/TNF	2
BP	GO:0048147	negative regulation of fibroblast proliferation	2/69	30/18800	0.00540415	0.0146239	0.00687683	MYC/TP53	2
BP	GO:0060142	regulation of syncytium formation by plasma membrane fusion	2/69	30/18800	0.00540415	0.0146239	0.00687683	CXCL10/TYROBP	2
BP	GO:1903579	negative regulation of ATP metabolic process	2/69	30/18800	0.00540415	0.0146239	0.00687683	TP53/TNF	2
BP	GO:0010952	positive regulation of peptidase activity	4/69	192/18800	0.00543577	0.0146956	0.00691054	MYC/LCK/FYN/TNF	4
BP	GO:0010596	negative regulation of endothelial cell migration	3/69	97/18800	0.00545365	0.01473	0.00692673	TGFB1/TNF/THBS1	3
BP	GO:0043062	extracellular structure organization	5/69	308/18800	0.0054599	0.014733	0.00692813	TNFRSF1B/TGFB1/CTSS/TNF/EMILIN1	5
BP	GO:0045229	external encapsulating structure organization	5/69	310/18800	0.00560916	0.0151215	0.00711082	TNFRSF1B/TGFB1/CTSS/TNF/EMILIN1	5
BP	GO:0071897	DNA biosynthetic process	4/69	194/18800	0.00563683	0.0151818	0.00713918	MYC/TP53/TNF/MAPK1	4
BP	GO:0002862	negative regulation of inflammatory response to antigenic stimulus	2/69	31/18800	0.00576322	0.015443	0.00726201	FYN/HCK	2
BP	GO:0035767	endothelial cell chemotaxis	2/69	31/18800	0.00576322	0.015443	0.00726201	THBS1/P2RX4	2
BP	GO:0060055	angiogenesis involved in wound healing	2/69	31/18800	0.00576322	0.015443	0.00726201	TNFAIP3/TNF	2
BP	GO:1902042	negative regulation of extrinsic apoptotic signaling pathway via death domain receptors	2/69	31/18800	0.00576322	0.015443	0.00726201	TNFAIP3/ICAM1	2
BP	GO:2000515	negative regulation of CD4-positive, alpha-beta T cell activation	2/69	31/18800	0.00576322	0.015443	0.00726201	TBX21/CD274	2
BP	GO:0014897	striated muscle hypertrophy	3/69	99/18800	0.00577157	0.015443	0.00726201	TNFRSF1B/IGFBP5/P2RX4	3
BP	GO:0015908	fatty acid transport	3/69	99/18800	0.00577157	0.015443	0.00726201	IL1B/THBS1/P2RX4	3
BP	GO:0090287	regulation of cellular response to growth factor stimulus	5/69	314/18800	0.0059163	0.0158155	0.00743717	TGFB1/TP53/IL1B/THBS1/EMILIN1	5
BP	GO:0031331	positive regulation of cellular catabolic process	6/69	449/18800	0.00605268	0.016165	0.00760151	TNFAIP3/TNFRSF1B/MYC/IL1B/TNF/PTK2	6
BP	GO:0014896	muscle hypertrophy	3/69	101/18800	0.0061004	0.016198	0.00761704	TNFRSF1B/IGFBP5/P2RX4	3
BP	GO:0032963	collagen metabolic process	3/69	101/18800	0.0061004	0.016198	0.00761704	TGFB1/CTSS/EMILIN1	3
BP	GO:0001516	prostaglandin biosynthetic process	2/69	32/18800	0.00613294	0.016198	0.00761704	CD74/IL1B	2
BP	GO:0003180	aortic valve morphogenesis	2/69	32/18800	0.00613294	0.016198	0.00761704	TGFB1/EMILIN1	2
BP	GO:0006026	aminoglycan catabolic process	2/69	32/18800	0.00613294	0.016198	0.00761704	CD44/TGFB1	2
BP	GO:0010743	regulation of macrophage derived foam cell differentiation	2/69	32/18800	0.00613294	0.016198	0.00761704	CSF1/NFKBIA	2
BP	GO:0030947	regulation of vascular endothelial growth factor receptor signaling pathway	2/69	32/18800	0.00613294	0.016198	0.00761704	IL1B/EMILIN1	2
BP	GO:0032770	positive regulation of monooxygenase activity	2/69	32/18800	0.00613294	0.016198	0.00761704	IL1B/TNF	2
BP	GO:0045070	positive regulation of viral genome replication	2/69	32/18800	0.00613294	0.016198	0.00761704	CD28/CCL5	2
BP	GO:0046457	prostanoid biosynthetic process	2/69	32/18800	0.00613294	0.016198	0.00761704	CD74/IL1B	2
BP	GO:0071353	cellular response to interleukin-4	2/69	32/18800	0.00613294	0.016198	0.00761704	STAT6/MRC1	2
BP	GO:1900745	positive regulation of p38MAPK cascade	2/69	32/18800	0.00613294	0.016198	0.00761704	IL1B/SPI1	2
BP	GO:0001763	morphogenesis of a branching structure	4/69	199/18800	0.00616111	0.0162574	0.00764497	MYC/CSF1/TNF/MDK	4
BP	GO:0023061	signal release	6/69	451/18800	0.00618189	0.0162972	0.0076637	CXCL12/IL1B/BTK/CCL5/TNF/P2RX4	6
BP	GO:0015849	organic acid transport	5/69	318/18800	0.00623516	0.0164225	0.00772262	MYC/IL1B/TNF/THBS1/P2RX4	5
BP	GO:0010717	regulation of epithelial to mesenchymal transition	3/69	102/18800	0.00626893	0.0164811	0.00775019	TGFB1/IL1B/MDK	3
BP	GO:2001243	negative regulation of intrinsic apoptotic signaling pathway	3/69	102/18800	0.00626893	0.0164811	0.00775019	CD44/CXCL12/CD74	3
BP	GO:0060249	anatomical structure homeostasis	5/69	319/18800	0.00631673	0.0165916	0.00780212	TNFAIP3/TLR9/CSF1/INPP5D/P2RX4	5
BP	GO:1901888	regulation of cell junction assembly	4/69	201/18800	0.00637961	0.0167414	0.00787257	IL1B/TNF/THBS1/PTK2	4
BP	GO:1903076	regulation of protein localization to plasma membrane	3/69	103/18800	0.00644023	0.016885	0.0079401	TGFB1/TNF/LGALS3	3
BP	GO:0036336	dendritic cell migration	2/69	33/18800	0.00651322	0.0169689	0.00797957	SPI1/CCL5	2
BP	GO:0050858	negative regulation of antigen receptor-mediated signaling pathway	2/69	33/18800	0.00651322	0.0169689	0.00797957	PTPN6/LGALS3	2
BP	GO:0050901	leukocyte tethering or rolling	2/69	33/18800	0.00651322	0.0169689	0.00797957	CXCL12/TNF	2
BP	GO:1901099	negative regulation of signal transduction in absence of ligand	2/69	33/18800	0.00651322	0.0169689	0.00797957	IL1B/TNF	2
BP	GO:1903715	regulation of aerobic respiration	2/69	33/18800	0.00651322	0.0169689	0.00797957	MYC/TNF	2
BP	GO:2001240	negative regulation of extrinsic apoptotic signaling pathway in absence of ligand	2/69	33/18800	0.00651322	0.0169689	0.00797957	IL1B/TNF	2
BP	GO:0052547	regulation of peptidase activity	6/69	456/18800	0.00651374	0.0169689	0.00797957	CD44/MYC/LCK/FYN/TNF/THBS1	6
BP	GO:0050830	defense response to Gram-positive bacterium	3/69	104/18800	0.00661431	0.0172152	0.00809541	IL7R/TNF/RARRES2	3
BP	GO:0071214	cellular response to abiotic stimulus	5/69	323/18800	0.00665054	0.0172781	0.00812498	IRF1/MYC/TP53/CD40/IL1B	5
BP	GO:0104004	cellular response to environmental stimulus	5/69	323/18800	0.00665054	0.0172781	0.00812498	IRF1/MYC/TP53/CD40/IL1B	5
BP	GO:0017157	regulation of exocytosis	4/69	204/18800	0.00671694	0.0174348	0.00819866	RAC2/SPI1/ITGAM/ITGB2	4
BP	GO:0070482	response to oxygen levels	5/69	324/18800	0.0067359	0.0174682	0.00821435	MYC/CXCL12/TP53/TNF/THBS1	5
BP	GO:0022411	cellular component disassembly	6/69	460/18800	0.00678844	0.0175885	0.00827093	MYC/TGFB1/TP53/CTSS/ITGAM/TNF	6
BP	GO:0007435	salivary gland morphogenesis	2/69	34/18800	0.00690399	0.0177593	0.00835126	TGFB1/TNF	2
BP	GO:0033006	regulation of mast cell activation involved in immune response	2/69	34/18800	0.00690399	0.0177593	0.00835126	RAC2/PTPN6	2
BP	GO:0033238	regulation of cellular amine metabolic process	2/69	34/18800	0.00690399	0.0177593	0.00835126	ITGAM/ITGB2	2
BP	GO:0035308	negative regulation of protein dephosphorylation	2/69	34/18800	0.00690399	0.0177593	0.00835126	TNF/LGALS3	2
BP	GO:0051973	positive regulation of telomerase activity	2/69	34/18800	0.00690399	0.0177593	0.00835126	MYC/MAPK1	2
BP	GO:0070670	response to interleukin-4	2/69	34/18800	0.00690399	0.0177593	0.00835126	STAT6/MRC1	2
BP	GO:1901797	negative regulation of signal transduction by p53 class mediator	2/69	34/18800	0.00690399	0.0177593	0.00835126	CD44/CD74	2
BP	GO:2000352	negative regulation of endothelial cell apoptotic process	2/69	34/18800	0.00690399	0.0177593	0.00835126	TNFAIP3/ICAM1	2
BP	GO:0033138	positive regulation of peptidyl-serine phosphorylation	3/69	107/18800	0.0071533	0.0183841	0.00864506	CD44/TGFB1/TNF	3
BP	GO:0045787	positive regulation of cell cycle	5/69	329/18800	0.00717426	0.0184214	0.00866261	CD28/MYC/IL1B/TNF/AIF1	5
BP	GO:0048545	response to steroid hormone	5/69	330/18800	0.00726427	0.0186358	0.00876344	TGFB1/TNF/AIF1/THBS1/MDK	5
BP	GO:1901215	negative regulation of neuron death	4/69	209/18800	0.00730513	0.0187072	0.008797	TNFRSF1B/CSF1/CCL2/MDK	4
BP	GO:0010614	negative regulation of cardiac muscle hypertrophy	2/69	35/18800	0.00730516	0.0187072	0.008797	TNFRSF1B/P2RX4	2
BP	GO:0048863	stem cell differentiation	4/69	211/18800	0.00754963	0.019316	0.00908328	TP53/KIT/PTPRC/MAPK1	4
BP	GO:0007431	salivary gland development	2/69	36/18800	0.00771665	0.0196756	0.00925237	TGFB1/TNF	2
BP	GO:0030851	granulocyte differentiation	2/69	36/18800	0.00771665	0.0196756	0.00925237	SPI1/INPP5D	2
BP	GO:0032611	interleukin-1 beta production	3/69	110/18800	0.00771766	0.0196756	0.00925237	TNFAIP3/TYROBP/TNF	3
BP	GO:0032651	regulation of interleukin-1 beta production	3/69	110/18800	0.00771766	0.0196756	0.00925237	TNFAIP3/TYROBP/TNF	3
BP	GO:0006469	negative regulation of protein kinase activity	4/69	213/18800	0.00779948	0.0198488	0.00933384	TNFAIP3/IL1B/PTPRC/PTPN6	4
BP	GO:0034764	positive regulation of transmembrane transport	4/69	213/18800	0.00779948	0.0198488	0.00933384	CD19/CCL2/CTSS/CXCL10	4
BP	GO:0007088	regulation of mitotic nuclear division	3/69	111/18800	0.00791147	0.0200981	0.00945105	CD28/IL1B/TNF	3
BP	GO:0031532	actin cytoskeleton reorganization	3/69	111/18800	0.00791147	0.0200981	0.00945105	KIT/HCK/MDK	3
BP	GO:0010633	negative regulation of epithelial cell migration	3/69	112/18800	0.00810813	0.0205794	0.0096774	TGFB1/TNF/THBS1	3
BP	GO:0010923	negative regulation of phosphatase activity	2/69	37/18800	0.00813839	0.0206197	0.00969632	TNF/LGALS3	2
BP	GO:0045730	respiratory burst	2/69	37/18800	0.00813839	0.0206197	0.00969632	RAC2/HCK	2
BP	GO:0031346	positive regulation of cell projection organization	5/69	341/18800	0.00830724	0.0209743	0.00986309	CXCL12/KIT/FYN/RAC2/MDK	5
BP	GO:0002526	acute inflammatory response	3/69	113/18800	0.00830766	0.0209743	0.00986309	IL1B/BTK/TNF	3
BP	GO:0031623	receptor internalization	3/69	113/18800	0.00830766	0.0209743	0.00986309	CXCL8/FCER1G/ITGB2	3
BP	GO:1904659	glucose transmembrane transport	3/69	113/18800	0.00830766	0.0209743	0.00986309	MYC/IL1B/TNF	3
BP	GO:0032965	regulation of collagen biosynthetic process	2/69	38/18800	0.0085703	0.0216183	0.0101659	TGFB1/EMILIN1	2
BP	GO:0021782	glial cell development	3/69	115/18800	0.00871537	0.0219649	0.0103289	IL1B/TNF/MDK	3
BP	GO:0010638	positive regulation of organelle organization	6/69	487/18800	0.00886824	0.0223305	0.0105008	CD28/TP53/IL1B/HCK/TNF/MAPK1	6
BP	GO:0014912	negative regulation of smooth muscle cell migration	2/69	39/18800	0.0090123	0.0226137	0.010634	IGFBP5/AIF1	2
BP	GO:0032570	response to progesterone	2/69	39/18800	0.0090123	0.0226137	0.010634	TGFB1/THBS1	2
BP	GO:0045923	positive regulation of fatty acid metabolic process	2/69	39/18800	0.0090123	0.0226137	0.010634	CD74/IL1B	2
BP	GO:0071634	regulation of transforming growth factor beta production	2/69	39/18800	0.0090123	0.0226137	0.010634	TYROBP/THBS1	2
BP	GO:0008645	hexose transmembrane transport	3/69	117/18800	0.00913467	0.0228806	0.0107595	MYC/IL1B/TNF	3
BP	GO:0045446	endothelial cell differentiation	3/69	117/18800	0.00913467	0.0228806	0.0107595	IL1B/ICAM1/TNF	3
BP	GO:0010038	response to metal ion	5/69	351/18800	0.00934207	0.0233758	0.0109924	CD14/KIT/MAPK1/THBS1/P2RX4	5
BP	GO:0032368	regulation of lipid transport	3/69	118/18800	0.00934868	0.0233758	0.0109924	IL1B/THBS1/P2RX4	3
BP	GO:0002790	peptide secretion	4/69	225/18800	0.00941351	0.0235173	0.0110589	CD74/IL1B/CCL5/TNF	4
BP	GO:0010863	positive regulation of phospholipase C activity	2/69	40/18800	0.0094643	0.0235825	0.0110896	KIT/CD86	2
BP	GO:0048713	regulation of oligodendrocyte differentiation	2/69	40/18800	0.0094643	0.0235825	0.0110896	TNFRSF1B/MDK	2
BP	GO:0051281	positive regulation of release of sequestered calcium ion into cytosol	2/69	40/18800	0.0094643	0.0235825	0.0110896	CD19/CXCL10	2
BP	GO:0009743	response to carbohydrate	4/69	226/18800	0.00955709	0.023793	0.0111886	MYC/IL1B/ICAM1/THBS1	4
BP	GO:0015749	monosaccharide transmembrane transport	3/69	119/18800	0.00956561	0.0237935	0.0111888	MYC/IL1B/TNF	3
BP	GO:0030203	glycosaminoglycan metabolic process	3/69	120/18800	0.00978547	0.0243193	0.011436	CD44/TGFB1/IL1B	3
BP	GO:0033574	response to testosterone	2/69	41/18800	0.00992625	0.0245625	0.0115504	MYC/THBS1	2
BP	GO:0034122	negative regulation of toll-like receptor signaling pathway	2/69	41/18800	0.00992625	0.0245625	0.0115504	TNFAIP3/TLR9	2
BP	GO:0045124	regulation of bone resorption	2/69	41/18800	0.00992625	0.0245625	0.0115504	TNFAIP3/INPP5D	2
BP	GO:1902742	apoptotic process involved in development	2/69	41/18800	0.00992625	0.0245625	0.0115504	TNFRSF1B/SPI1	2
BP	GO:2000008	regulation of protein localization to cell surface	2/69	41/18800	0.00992625	0.0245625	0.0115504	TYROBP/TNF	2
BP	GO:0002455	humoral immune response mediated by circulating immunoglobulin	3/69	121/18800	0.0100083	0.0247014	0.0116158	PTPRC/PTPN6/TNF	3
BP	GO:0038127	ERBB signaling pathway	3/69	121/18800	0.0100083	0.0247014	0.0116158	TGFB1/MAPK1/PTK2	3
BP	GO:0051101	regulation of DNA binding	3/69	121/18800	0.0100083	0.0247014	0.0116158	MYC/TGFB1/NFKBIA	3
BP	GO:0019730	antimicrobial humoral response	3/69	122/18800	0.010234	0.0252151	0.0118573	CXCL8/CXCL10/RARRES2	3
BP	GO:0071901	negative regulation of protein serine/threonine kinase activity	3/69	122/18800	0.010234	0.0252151	0.0118573	TNFAIP3/IL1B/PTPN6	3
BP	GO:0002347	response to tumor cell	2/69	42/18800	0.010398	0.0254007	0.0119446	CD274/SPI1	2
BP	GO:0042417	dopamine metabolic process	2/69	42/18800	0.010398	0.0254007	0.0119446	ITGAM/ITGB2	2
BP	GO:0046636	negative regulation of alpha-beta T cell activation	2/69	42/18800	0.010398	0.0254007	0.0119446	TBX21/CD274	2
BP	GO:0050691	regulation of defense response to virus by host	2/69	42/18800	0.010398	0.0254007	0.0119446	TNFAIP3/IL1B	2
BP	GO:0050999	regulation of nitric-oxide synthase activity	2/69	42/18800	0.010398	0.0254007	0.0119446	IL1B/TNF	2
BP	GO:0051602	response to electrical stimulus	2/69	42/18800	0.010398	0.0254007	0.0119446	CD14/AIF1	2
BP	GO:0060338	regulation of type I interferon-mediated signaling pathway	2/69	42/18800	0.010398	0.0254007	0.0119446	IRF7/PTPN6	2
BP	GO:0070266	necroptotic process	2/69	42/18800	0.010398	0.0254007	0.0119446	TP53/TNF	2
BP	GO:1900274	regulation of phospholipase C activity	2/69	42/18800	0.010398	0.0254007	0.0119446	KIT/CD86	2
BP	GO:2000249	regulation of actin cytoskeleton reorganization	2/69	42/18800	0.010398	0.0254007	0.0119446	HCK/MDK	2
BP	GO:0030218	erythrocyte differentiation	3/69	124/18800	0.0106943	0.0260578	0.0122536	KIT/SPI1/INPP5D	3
BP	GO:0046683	response to organophosphorus	3/69	124/18800	0.0106943	0.0260578	0.0122536	IGFBP5/IL1B/P2RX4	3
BP	GO:1904375	regulation of protein localization to cell periphery	3/69	124/18800	0.0106943	0.0260578	0.0122536	TGFB1/TNF/LGALS3	3
BP	GO:0007411	axon guidance	4/69	234/18800	0.0107574	0.0261891	0.0123153	CXCL12/FYN/RAC2/PTK2	4
BP	GO:0010712	regulation of collagen metabolic process	2/69	43/18800	0.0108796	0.0263523	0.0123921	TGFB1/EMILIN1	2
BP	GO:0014002	astrocyte development	2/69	43/18800	0.0108796	0.0263523	0.0123921	IL1B/TNF	2
BP	GO:0016601	Rac protein signal transduction	2/69	43/18800	0.0108796	0.0263523	0.0123921	RAC2/AIF1	2
BP	GO:0043507	positive regulation of JUN kinase activity	2/69	43/18800	0.0108796	0.0263523	0.0123921	TLR9/TNF	2
BP	GO:0071604	transforming growth factor beta production	2/69	43/18800	0.0108796	0.0263523	0.0123921	TYROBP/THBS1	2
BP	GO:0140353	NA	2/69	43/18800	0.0108796	0.0263523	0.0123921	IL1B/P2RX4	2
BP	GO:0097485	neuron projection guidance	4/69	235/18800	0.0109139	0.026413	0.0124206	CXCL12/FYN/RAC2/PTK2	4
BP	GO:0043280	positive regulation of cysteine-type endopeptidase activity involved in apoptotic process	3/69	125/18800	0.010929	0.026427	0.0124272	MYC/LCK/TNF	3
BP	GO:0033673	negative regulation of kinase activity	4/69	236/18800	0.011072	0.0267503	0.0125792	TNFAIP3/IL1B/PTPRC/PTPN6	4
BP	GO:0010799	regulation of peptidyl-threonine phosphorylation	2/69	44/18800	0.0113709	0.0274031	0.0128862	TGFB1/MAPK1	2
BP	GO:0097178	ruffle assembly	2/69	44/18800	0.0113709	0.0274031	0.0128862	ICAM1/AIF1	2
BP	GO:2001239	regulation of extrinsic apoptotic signaling pathway in absence of ligand	2/69	44/18800	0.0113709	0.0274031	0.0128862	IL1B/TNF	2
BP	GO:0042542	response to hydrogen peroxide	3/69	128/18800	0.0116507	0.0280537	0.0131922	STAT6/TNFAIP3/FYN	3
BP	GO:0032892	positive regulation of organic acid transport	2/69	45/18800	0.0118718	0.0284559	0.0133813	IL1B/P2RX4	2
BP	GO:0033003	regulation of mast cell activation	2/69	45/18800	0.0118718	0.0284559	0.0133813	RAC2/PTPN6	2
BP	GO:0046006	regulation of activated T cell proliferation	2/69	45/18800	0.0118718	0.0284559	0.0133813	IL2RA/CD274	2
BP	GO:0060612	adipose tissue development	2/69	45/18800	0.0118718	0.0284559	0.0133813	CSF1/SPI1	2
BP	GO:1901861	regulation of muscle tissue development	2/69	45/18800	0.0118718	0.0284559	0.0133813	TGFB1/IGFBP5	2
BP	GO:0001101	response to acid chemical	3/69	129/18800	0.0118972	0.0284559	0.0133813	MYC/FYN/TNF	3
BP	GO:0032612	interleukin-1 production	3/69	129/18800	0.0118972	0.0284559	0.0133813	TNFAIP3/TYROBP/TNF	3
BP	GO:0032652	regulation of interleukin-1 production	3/69	129/18800	0.0118972	0.0284559	0.0133813	TNFAIP3/TYROBP/TNF	3
BP	GO:0010665	regulation of cardiac muscle cell apoptotic process	2/69	46/18800	0.0123823	0.0294355	0.0138419	TP53/MDK	2
BP	GO:0032309	icosanoid secretion	2/69	46/18800	0.0123823	0.0294355	0.0138419	IL1B/P2RX4	2
BP	GO:0035307	positive regulation of protein dephosphorylation	2/69	46/18800	0.0123823	0.0294355	0.0138419	TGFB1/PTPRC	2
BP	GO:0085029	extracellular matrix assembly	2/69	46/18800	0.0123823	0.0294355	0.0138419	TGFB1/EMILIN1	2
BP	GO:1900744	regulation of p38MAPK cascade	2/69	46/18800	0.0123823	0.0294355	0.0138419	IL1B/SPI1	2
BP	GO:1904707	positive regulation of vascular smooth muscle cell proliferation	2/69	46/18800	0.0123823	0.0294355	0.0138419	IGFBP5/TNF	2
BP	GO:0048762	mesenchymal cell differentiation	4/69	244/18800	0.0123898	0.0294355	0.0138419	TGFB1/IL1B/MAPK1/MDK	4
BP	GO:0006022	aminoglycan metabolic process	3/69	131/18800	0.0123993	0.0294355	0.0138419	CD44/TGFB1/IL1B	3
BP	GO:0034219	carbohydrate transmembrane transport	3/69	131/18800	0.0123993	0.0294355	0.0138419	MYC/IL1B/TNF	3
BP	GO:0006612	protein targeting to membrane	3/69	132/18800	0.0126549	0.0300173	0.0141155	FYN/ITGAM/ITGB2	3
BP	GO:0032964	collagen biosynthetic process	2/69	47/18800	0.0129022	0.030354	0.0142738	TGFB1/EMILIN1	2
BP	GO:0045601	regulation of endothelial cell differentiation	2/69	47/18800	0.0129022	0.030354	0.0142738	IL1B/TNF	2
BP	GO:0045646	regulation of erythrocyte differentiation	2/69	47/18800	0.0129022	0.030354	0.0142738	SPI1/INPP5D	2
BP	GO:0046717	acid secretion	2/69	47/18800	0.0129022	0.030354	0.0142738	MYC/TNF	2
BP	GO:0070849	response to epidermal growth factor	2/69	47/18800	0.0129022	0.030354	0.0142738	MYC/MAPK1	2
BP	GO:0097028	dendritic cell differentiation	2/69	47/18800	0.0129022	0.030354	0.0142738	IRF8/SPI1	2
BP	GO:0101023	vascular endothelial cell proliferation	2/69	47/18800	0.0129022	0.030354	0.0142738	CCL2/MDK	2
BP	GO:1905562	regulation of vascular endothelial cell proliferation	2/69	47/18800	0.0129022	0.030354	0.0142738	CCL2/MDK	2
BP	GO:2000378	negative regulation of reactive oxygen species metabolic process	2/69	47/18800	0.0129022	0.030354	0.0142738	TP53/FYN	2
BP	GO:0090068	positive regulation of cell cycle process	4/69	247/18800	0.0129088	0.030354	0.0142738	CD28/IL1B/TNF/AIF1	4
BP	GO:0034101	erythrocyte homeostasis	3/69	133/18800	0.0129134	0.030354	0.0142738	KIT/SPI1/INPP5D	3
BP	GO:0014074	response to purine-containing compound	3/69	134/18800	0.013175	0.0309181	0.0145391	IGFBP5/IL1B/P2RX4	3
BP	GO:0043467	regulation of generation of precursor metabolites and energy	3/69	134/18800	0.013175	0.0309181	0.0145391	MYC/TP53/TNF	3
BP	GO:0015833	peptide transport	4/69	249/18800	0.0132625	0.0310978	0.0146236	CD74/IL1B/CCL5/TNF	4
BP	GO:0006953	acute-phase response	2/69	48/18800	0.0134316	0.0313404	0.0147377	IL1B/TNF	2
BP	GO:0010662	regulation of striated muscle cell apoptotic process	2/69	48/18800	0.0134316	0.0313404	0.0147377	TP53/MDK	2
BP	GO:0031641	regulation of myelination	2/69	48/18800	0.0134316	0.0313404	0.0147377	TNFRSF1B/TNF	2
BP	GO:0035272	exocrine system development	2/69	48/18800	0.0134316	0.0313404	0.0147377	TGFB1/TNF	2
BP	GO:0035305	negative regulation of dephosphorylation	2/69	48/18800	0.0134316	0.0313404	0.0147377	TNF/LGALS3	2
BP	GO:0048146	positive regulation of fibroblast proliferation	2/69	48/18800	0.0134316	0.0313404	0.0147377	MYC/CD74	2
BP	GO:0045667	regulation of osteoblast differentiation	3/69	136/18800	0.0137073	0.0319575	0.0150279	IGFBP5/TNF/PTK2	3
BP	GO:0045786	negative regulation of cell cycle	5/69	387/18800	0.0138029	0.0321318	0.0151099	TNFAIP3/TGFB1/TP53/CCL2/TNF	5
BP	GO:0050708	regulation of protein secretion	4/69	252/18800	0.0138044	0.0321318	0.0151099	TGFB1/IL1B/CCL5/TNF	4
BP	GO:0002762	negative regulation of myeloid leukocyte differentiation	2/69	49/18800	0.0139703	0.0323338	0.0152049	MYC/INPP5D	2
BP	GO:0010659	cardiac muscle cell apoptotic process	2/69	49/18800	0.0139703	0.0323338	0.0152049	TP53/MDK	2
BP	GO:0035094	response to nicotine	2/69	49/18800	0.0139703	0.0323338	0.0152049	TNF/MAPK1	2
BP	GO:0042304	regulation of fatty acid biosynthetic process	2/69	49/18800	0.0139703	0.0323338	0.0152049	CD74/IL1B	2
BP	GO:0043330	response to exogenous dsRNA	2/69	49/18800	0.0139703	0.0323338	0.0152049	NFKBIA/MAPK1	2
BP	GO:0097300	programmed necrotic cell death	2/69	49/18800	0.0139703	0.0323338	0.0152049	TP53/TNF	2
BP	GO:1903793	positive regulation of anion transport	2/69	49/18800	0.0139703	0.0323338	0.0152049	IL1B/P2RX4	2
BP	GO:0006692	prostanoid metabolic process	2/69	50/18800	0.0145182	0.0333827	0.0156981	CD74/IL1B	2
BP	GO:0006693	prostaglandin metabolic process	2/69	50/18800	0.0145182	0.0333827	0.0156981	CD74/IL1B	2
BP	GO:0043457	regulation of cellular respiration	2/69	50/18800	0.0145182	0.0333827	0.0156981	MYC/TNF	2
BP	GO:0052372	modulation by symbiont of entry into host	2/69	50/18800	0.0145182	0.0333827	0.0156981	CXCL8/CD74	2
BP	GO:0060425	lung morphogenesis	2/69	50/18800	0.0145182	0.0333827	0.0156981	TNF/MAPK1	2
BP	GO:1903307	positive regulation of regulated secretory pathway	2/69	50/18800	0.0145182	0.0333827	0.0156981	ITGAM/ITGB2	2
BP	GO:0019827	stem cell population maintenance	3/69	139/18800	0.0145284	0.0333827	0.0156981	MYC/KIT/SPI1	3
BP	GO:0051384	response to glucocorticoid	3/69	139/18800	0.0145284	0.0333827	0.0156981	TNF/AIF1/MDK	3
BP	GO:0051783	regulation of nuclear division	3/69	139/18800	0.0145284	0.0333827	0.0156981	CD28/IL1B/TNF	3
BP	GO:0050768	negative regulation of neurogenesis	3/69	140/18800	0.0148082	0.0339983	0.0159876	TP53/IL1B/TNF	3
BP	GO:0009409	response to cold	2/69	51/18800	0.0150754	0.0344543	0.016202	CXCL10/NFKBIA	2
BP	GO:0010658	striated muscle cell apoptotic process	2/69	51/18800	0.0150754	0.0344543	0.016202	TP53/MDK	2
BP	GO:0045668	negative regulation of osteoblast differentiation	2/69	51/18800	0.0150754	0.0344543	0.016202	IGFBP5/TNF	2
BP	GO:0045912	negative regulation of carbohydrate metabolic process	2/69	51/18800	0.0150754	0.0344543	0.016202	TGFB1/TP53	2
BP	GO:0060688	regulation of morphogenesis of a branching structure	2/69	51/18800	0.0150754	0.0344543	0.016202	TNF/MDK	2
BP	GO:0046328	regulation of JNK cascade	3/69	141/18800	0.0150911	0.0344543	0.016202	TLR9/IL1B/TNF	3
BP	GO:0098727	maintenance of cell number	3/69	141/18800	0.0150911	0.0344543	0.016202	MYC/KIT/SPI1	3
BP	GO:0045598	regulation of fat cell differentiation	3/69	142/18800	0.015377	0.0350791	0.0164958	TGFB1/TNF/RARRES2	3
BP	GO:0006636	unsaturated fatty acid biosynthetic process	2/69	52/18800	0.0156416	0.035626	0.016753	CD74/IL1B	2
BP	GO:0048013	ephrin receptor signaling pathway	2/69	52/18800	0.0156416	0.035626	0.016753	FYN/PTK2	2
BP	GO:1903531	negative regulation of secretion by cell	3/69	143/18800	0.0156659	0.0356531	0.0167657	TNFRSF1B/IL1B/SPI1	3
BP	GO:0043254	regulation of protein complex assembly	5/69	401/18800	0.0158702	0.0360892	0.0169708	TGFB1/TP53/HCK/TNF/LGALS3	5
BP	GO:0033135	regulation of peptidyl-serine phosphorylation	3/69	144/18800	0.015958	0.03626	0.0170512	CD44/TGFB1/TNF	3
BP	GO:0007611	learning or memory	4/69	264/18800	0.0161129	0.0365831	0.0172031	KIT/FYN/MAPK1/MDK	4
BP	GO:0050832	defense response to fungus	2/69	53/18800	0.0162169	0.0367608	0.0172866	SPI1/RARRES2	2
BP	GO:1902743	regulation of lamellipodium organization	2/69	53/18800	0.0162169	0.0367608	0.0172866	CD44/RAC2	2
BP	GO:0051961	negative regulation of nervous system development	3/69	145/18800	0.0162531	0.0368137	0.0173115	TP53/IL1B/TNF	3
BP	GO:0090092	regulation of transmembrane receptor protein serine/threonine kinase signaling pathway	4/69	267/18800	0.0167257	0.0378543	0.0178009	TGFB1/TP53/THBS1/EMILIN1	4
BP	GO:0045744	negative regulation of G protein-coupled receptor signaling pathway	2/69	54/18800	0.0168011	0.037965	0.0178529	CXCL8/CCL5	2
BP	GO:0071715	icosanoid transport	2/69	54/18800	0.0168011	0.037965	0.0178529	IL1B/P2RX4	2
BP	GO:0050796	regulation of insulin secretion	3/69	147/18800	0.0168525	0.0380509	0.0178933	IL1B/CCL5/TNF	3
BP	GO:0001954	positive regulation of cell-matrix adhesion	2/69	55/18800	0.0173943	0.03912	0.018396	CD3E/CSF1	2
BP	GO:0003179	heart valve morphogenesis	2/69	55/18800	0.0173943	0.03912	0.018396	TGFB1/EMILIN1	2
BP	GO:0010883	regulation of lipid storage	2/69	55/18800	0.0173943	0.03912	0.018396	NFKBIA/TNF	2
BP	GO:0042743	hydrogen peroxide metabolic process	2/69	55/18800	0.0173943	0.03912	0.018396	FYN/RAC2	2
BP	GO:0043470	regulation of carbohydrate catabolic process	2/69	55/18800	0.0173943	0.03912	0.018396	MYC/TP53	2
BP	GO:0046034	ATP metabolic process	4/69	273/18800	0.0179949	0.0403155	0.0189582	MYC/TGFB1/TP53/TNF	4
BP	GO:0031529	ruffle organization	2/69	56/18800	0.0179962	0.0403155	0.0189582	ICAM1/AIF1	2
BP	GO:0043331	response to dsRNA	2/69	56/18800	0.0179962	0.0403155	0.0189582	NFKBIA/MAPK1	2
BP	GO:0043903	regulation of symbiosis, encompassing mutualism through parasitism	2/69	56/18800	0.0179962	0.0403155	0.0189582	CXCL8/CD74	2
BP	GO:0060337	type I interferon signaling pathway	2/69	56/18800	0.0179962	0.0403155	0.0189582	IRF7/PTPN6	2
BP	GO:1905039	carboxylic acid transmembrane transport	3/69	152/18800	0.0184048	0.0411985	0.0193735	MYC/TNF/THBS1	3
BP	GO:0001541	ovarian follicle development	2/69	57/18800	0.018607	0.0413922	0.0194645	MYC/KIT	2
BP	GO:0006754	ATP biosynthetic process	2/69	57/18800	0.018607	0.0413922	0.0194645	MYC/TGFB1	2
BP	GO:0030219	megakaryocyte differentiation	2/69	57/18800	0.018607	0.0413922	0.0194645	KIT/PTPN6	2
BP	GO:0032768	regulation of monooxygenase activity	2/69	57/18800	0.018607	0.0413922	0.0194645	IL1B/TNF	2
BP	GO:0038066	p38MAPK cascade	2/69	57/18800	0.018607	0.0413922	0.0194645	IL1B/SPI1	2
BP	GO:0043388	positive regulation of DNA binding	2/69	57/18800	0.018607	0.0413922	0.0194645	MYC/TGFB1	2
BP	GO:0045071	negative regulation of viral genome replication	2/69	57/18800	0.018607	0.0413922	0.0194645	CCL5/TNF	2
BP	GO:0046456	icosanoid biosynthetic process	2/69	57/18800	0.018607	0.0413922	0.0194645	CD74/IL1B	2
BP	GO:1903825	organic acid transmembrane transport	3/69	153/18800	0.0187245	0.0416213	0.0195723	MYC/TNF/THBS1	3
BP	GO:0006584	catecholamine metabolic process	2/69	58/18800	0.0192264	0.0425058	0.0199882	ITGAM/ITGB2	2
BP	GO:0006611	protein export from nucleus	2/69	58/18800	0.0192264	0.0425058	0.0199882	TGFB1/IL1B	2
BP	GO:0009712	catechol-containing compound metabolic process	2/69	58/18800	0.0192264	0.0425058	0.0199882	ITGAM/ITGB2	2
BP	GO:0050732	negative regulation of peptidyl-tyrosine phosphorylation	2/69	58/18800	0.0192264	0.0425058	0.0199882	PTPRC/PTPN6	2
BP	GO:0071357	cellular response to type I interferon	2/69	58/18800	0.0192264	0.0425058	0.0199882	IRF7/PTPN6	2
BP	GO:0090303	positive regulation of wound healing	2/69	58/18800	0.0192264	0.0425058	0.0199882	THBS1/PTK2	2
BP	GO:1900024	regulation of substrate adhesion-dependent cell spreading	2/69	58/18800	0.0192264	0.0425058	0.0199882	PTK2/MDK	2
BP	GO:0046942	carboxylic acid transport	4/69	279/18800	0.0193227	0.042686	0.0200729	MYC/IL1B/TNF/P2RX4	4
BP	GO:0008643	carbohydrate transport	3/69	156/18800	0.0197022	0.0434907	0.0204513	MYC/IL1B/TNF	3
BP	GO:0046879	hormone secretion	4/69	281/18800	0.0197785	0.0435913	0.0204987	IL1B/BTK/CCL5/TNF	4
BP	GO:0000768	syncytium formation by plasma membrane fusion	2/69	59/18800	0.0198544	0.0435913	0.0204987	CXCL10/TYROBP	2
BP	GO:0035065	regulation of histone acetylation	2/69	59/18800	0.0198544	0.0435913	0.0204987	IL1B/SPI1	2
BP	GO:0045599	negative regulation of fat cell differentiation	2/69	59/18800	0.0198544	0.0435913	0.0204987	TGFB1/TNF	2
BP	GO:0046686	response to cadmium ion	2/69	59/18800	0.0198544	0.0435913	0.0204987	KIT/MAPK1	2
BP	GO:0051353	positive regulation of oxidoreductase activity	2/69	59/18800	0.0198544	0.0435913	0.0204987	IL1B/TNF	2
BP	GO:0140253	cell-cell fusion	2/69	59/18800	0.0198544	0.0435913	0.0204987	CXCL10/TYROBP	2
BP	GO:0031960	response to corticosteroid	3/69	157/18800	0.0200343	0.0439526	0.0206686	TNF/AIF1/MDK	3
BP	GO:0043407	negative regulation of MAP kinase activity	2/69	60/18800	0.0204909	0.0447829	0.021059	IL1B/PTPN6	2
BP	GO:0043506	regulation of JUN kinase activity	2/69	60/18800	0.0204909	0.0447829	0.021059	TLR9/TNF	2
BP	GO:0046324	regulation of glucose import	2/69	60/18800	0.0204909	0.0447829	0.021059	MYC/TNF	2
BP	GO:0046824	positive regulation of nucleocytoplasmic transport	2/69	60/18800	0.0204909	0.0447829	0.021059	TGFB1/IL1B	2
BP	GO:1903078	positive regulation of protein localization to plasma membrane	2/69	60/18800	0.0204909	0.0447829	0.021059	TNF/LGALS3	2
BP	GO:0006606	protein import into nucleus	3/69	159/18800	0.0207077	0.0452222	0.0212656	TGFB1/TP53/NFKBIA	3
BP	GO:0002262	myeloid cell homeostasis	3/69	160/18800	0.0210491	0.0459326	0.0215996	KIT/SPI1/INPP5D	3
BP	GO:0030865	cortical cytoskeleton organization	2/69	61/18800	0.021136	0.046052	0.0216558	RAC2/TNF	2
BP	GO:0035306	positive regulation of dephosphorylation	2/69	61/18800	0.021136	0.046052	0.0216558	TGFB1/PTPRC	2
BP	GO:0042886	amide transport	4/69	287/18800	0.0211857	0.0461253	0.0216903	CD74/IL1B/CCL5/TNF	4
BP	GO:0048608	reproductive structure development	5/69	433/18800	0.0213512	0.0464501	0.021843	MYC/KIT/PTPN6/MAPK1/PTK2	5
BP	GO:0001837	epithelial to mesenchymal transition	3/69	162/18800	0.0217411	0.0472599	0.0222238	TGFB1/IL1B/MDK	3
BP	GO:0022617	extracellular matrix disassembly	2/69	62/18800	0.0217894	0.0472599	0.0222238	TGFB1/CTSS	2
BP	GO:0032731	positive regulation of interleukin-1 beta production	2/69	62/18800	0.0217894	0.0472599	0.0222238	TYROBP/TNF	2
BP	GO:0060393	regulation of pathway-restricted SMAD protein phosphorylation	2/69	62/18800	0.0217894	0.0472599	0.0222238	TGFB1/EMILIN1	2
BP	GO:0009914	hormone transport	4/69	290/18800	0.0219119	0.0474735	0.0223243	IL1B/BTK/CCL5/TNF	4
BP	GO:0061458	reproductive system development	5/69	436/18800	0.0219211	0.0474735	0.0223243	MYC/KIT/PTPN6/MAPK1/PTK2	5
BP	GO:0007568	aging	3/69	163/18800	0.0220918	0.047771	0.0224641	TNFRSF1B/IGFBP5/CD68	3
BP	GO:0051170	import into nucleus	3/69	163/18800	0.0220918	0.047771	0.0224641	TGFB1/TP53/NFKBIA	3
BP	GO:0001764	neuron migration	3/69	164/18800	0.0224455	0.0483655	0.0227437	CXCL12/FYN/MDK	3
BP	GO:0006949	syncytium formation	2/69	63/18800	0.0224512	0.0483655	0.0227437	CXCL10/TYROBP	2
BP	GO:0045453	bone resorption	2/69	63/18800	0.0224512	0.0483655	0.0227437	TNFAIP3/INPP5D	2
BP	GO:0051893	regulation of focal adhesion assembly	2/69	63/18800	0.0224512	0.0483655	0.0227437	THBS1/PTK2	2
BP	GO:0090109	regulation of cell-substrate junction assembly	2/69	63/18800	0.0224512	0.0483655	0.0227437	THBS1/PTK2	2
BP	GO:0044772	mitotic cell cycle phase transition	5/69	440/18800	0.0226963	0.0488568	0.0229747	MYC/TP53/CCL2/PTPN6/AIF1	5
BP	GO:0034504	protein localization to nucleus	4/69	294/18800	0.0229037	0.0492663	0.0231673	TGFB1/TP53/FYN/NFKBIA	4
BP	GO:0034340	response to type I interferon	2/69	64/18800	0.0231212	0.0496968	0.0233697	IRF7/PTPN6	2
CC	GO:0009897	external side of plasma membrane	27/69	455/19594	1.60202e-26	2.61129e-24	1.48397e-24	CD3E/IL2RA/CD3D/CD28/IL7R/CD83/CD274/CD14/CXCL12/CTLA4/CD40LG/CD40/CD19/KIT/CD79B/CD74/CD79A/CD86/PTPRC/ICAM1/CXCL10/FCER1G/ITGAM/ITGB2/TNF/CD2/THBS1	27
CC	GO:0045121	membrane raft	17/69	326/19594	1.03208e-15	5.90012e-14	3.35299e-14	STAT6/TNFRSF1B/CD14/CD19/LCK/CD79A/FYN/PTPRC/HCK/BTK/INPP5D/ICAM1/ITGAM/ITGB2/TNF/CD2/MAPK1	17
CC	GO:0098857	membrane microdomain	17/69	327/19594	1.08591e-15	5.90012e-14	3.35299e-14	STAT6/TNFRSF1B/CD14/CD19/LCK/CD79A/FYN/PTPRC/HCK/BTK/INPP5D/ICAM1/ITGAM/ITGB2/TNF/CD2/MAPK1	17
CC	GO:0001772	immunological synapse	6/69	44/19594	9.70204e-09	3.66004e-07	2.07997e-07	CD3E/CD28/LCK/ICAM1/HLA-DRA/LGALS3	6
CC	GO:0030667	secretory granule membrane	11/69	312/19594	1.12271e-08	3.66004e-07	2.07997e-07	CD44/TNFRSF1B/CD14/CD68/PTPRC/FCER1G/ITGAM/ITGB2/TYROBP/C3AR1/LGALS3	11
CC	GO:0098802	plasma membrane receptor complex	10/69	313/19594	1.3852e-07	3.76311e-06	2.13855e-06	CD3E/IL2RA/CD3D/CD40/CD79B/CD79A/PTPN6/ITGAM/ITGB2/EMILIN1	10
CC	GO:0098636	protein complex involved in cell adhesion	5/69	43/19594	4.05487e-07	9.44206e-06	5.36585e-06	CD28/CTLA4/ITGAM/ITGB2/EMILIN1	5
CC	GO:0009898	cytoplasmic side of plasma membrane	7/69	169/19594	2.15769e-06	4.3963e-05	2.49838e-05	KIT/LCK/FYN/PTPRC/HCK/CD2/PTK2	7
CC	GO:0098562	cytoplasmic side of membrane	7/69	193/19594	5.19586e-06	9.41028e-05	5.34779e-05	KIT/LCK/FYN/PTPRC/HCK/CD2/PTK2	7
CC	GO:0042105	alpha-beta T cell receptor complex	3/69	11/19594	6.75816e-06	0.000110158	6.26019e-05	CD3E/CD3D/PTPN6	3
CC	GO:0005925	focal adhesion	9/69	419/19594	1.56365e-05	0.000219383	0.000124674	CD44/TNFSF13B/RAC2/PTPRC/HCK/ICAM1/ITGB2/MAPK1/PTK2	9
CC	GO:0045334	clathrin-coated endocytic vesicle	5/69	91/19594	1.71917e-05	0.000219383	0.000124674	CD3D/IL7R/CTLA4/CD74/HLA-DRA	5
CC	GO:0030055	cell-substrate junction	9/69	428/19594	1.84988e-05	0.000219383	0.000124674	CD44/TNFSF13B/RAC2/PTPRC/HCK/ICAM1/ITGB2/MAPK1/PTK2	9
CC	GO:0062023	collagen-containing extracellular matrix	9/69	429/19594	1.88427e-05	0.000219383	0.000124674	TGFB1/CXCL12/CTSS/ICAM1/RARRES2/LGALS3/THBS1/EMILIN1/MDK	9
CC	GO:0070820	tertiary granule	6/69	164/19594	2.4323e-05	0.00026431	0.000150205	CTSS/PTPN6/FCER1G/ITGAM/ITGB2/LGALS3	6
CC	GO:0030139	endocytic vesicle	8/69	342/19594	2.62775e-05	0.000267702	0.000152133	CD3D/IL7R/CTLA4/TLR9/CD74/RAC2/CTSS/HLA-DRA	8
CC	GO:0030669	clathrin-coated endocytic vesicle membrane	4/69	72/19594	0.000120958	0.00115977	0.00065909	CD3D/IL7R/CD74/HLA-DRA	4
CC	GO:0008305	integrin complex	3/69	31/19594	0.000175045	0.00158513	0.000900816	ITGAM/ITGB2/EMILIN1	3
CC	GO:0042581	specific granule	5/69	160/19594	0.000251487	0.00215749	0.00122609	TNFRSF1B/PTPN6/ITGAM/ITGB2/C3AR1	5
CC	GO:0035579	specific granule membrane	4/69	91/19594	0.000298842	0.00243556	0.00138411	TNFRSF1B/ITGAM/ITGB2/C3AR1	4
CC	GO:0031234	extrinsic component of cytoplasmic side of plasma membrane	4/69	99/19594	0.000412112	0.00319878	0.00181784	LCK/FYN/HCK/PTK2	4
CC	GO:0005770	late endosome	6/69	283/19594	0.000481448	0.00347185	0.00197302	CD74/CD79A/CD68/CTSS/HLA-DRA/MAPK1	6
CC	GO:0101002	ficolin-1-rich granule	5/69	185/19594	0.000489893	0.00347185	0.00197302	CTSS/FCER1G/ITGB2/MAPK1/LGALS3	5
CC	GO:0030136	clathrin-coated vesicle	5/69	192/19594	0.000579949	0.00393882	0.0022384	CD3D/IL7R/CTLA4/CD74/HLA-DRA	5
CC	GO:0030666	endocytic vesicle membrane	5/69	194/19594	0.000607826	0.00395468	0.00224741	CD3D/IL7R/CD74/RAC2/HLA-DRA	5
CC	GO:0030665	clathrin-coated vesicle membrane	4/69	111/19594	0.000635223	0.00395468	0.00224741	CD3D/IL7R/CD74/HLA-DRA	4
CC	GO:0005884	actin filament	4/69	113/19594	0.000679332	0.00395468	0.00224741	FYN/RAC2/HCK/AIF1	4
CC	GO:0044853	plasma membrane raft	4/69	113/19594	0.000679332	0.00395468	0.00224741	HCK/ITGAM/ITGB2/MAPK1	4
CC	GO:0101003	ficolin-1-rich granule membrane	3/69	61/19594	0.00129964	0.00730489	0.00415131	FCER1G/ITGB2/LGALS3	3
CC	GO:0042613	MHC class II protein complex	2/69	17/19594	0.00160631	0.00872763	0.00495984	CD74/HLA-DRA	2
CC	GO:0070821	tertiary granule membrane	3/69	73/19594	0.00217937	0.0114593	0.00651221	FCER1G/ITGAM/ITGB2	3
CC	GO:0005765	lysosomal membrane	6/69	404/19594	0.00297174	0.0146222	0.0083097	TLR9/CD74/CD68/HLA-DRA/C3AR1/P2RX4	6
CC	GO:0098852	lytic vacuole membrane	6/69	404/19594	0.00297174	0.0146222	0.0083097	TLR9/CD74/CD68/HLA-DRA/C3AR1/P2RX4	6
CC	GO:0019897	extrinsic component of plasma membrane	4/69	170/19594	0.00305004	0.0146222	0.0083097	LCK/FYN/HCK/PTK2	4
CC	GO:0030662	coated vesicle membrane	4/69	176/19594	0.00345344	0.0156929	0.00891812	CD3D/IL7R/CD74/HLA-DRA	4
CC	GO:0042611	MHC protein complex	2/69	25/19594	0.00347952	0.0156929	0.00891812	CD74/HLA-DRA	2
CC	GO:0030135	coated vesicle	5/69	290/19594	0.00356218	0.0156929	0.00891812	CD3D/IL7R/CTLA4/CD74/HLA-DRA	5
CC	GO:0001891	phagocytic cup	2/69	28/19594	0.00435445	0.0181994	0.0103426	TNF/AIF1	2
CC	GO:0036019	endolysosome	2/69	28/19594	0.00435445	0.0181994	0.0103426	TLR9/CTSS	2
CC	GO:0071556	integral component of lumenal side of endoplasmic reticulum membrane	2/69	29/19594	0.00466641	0.0185518	0.0105429	CD74/HLA-DRA	2
CC	GO:0098553	lumenal side of endoplasmic reticulum membrane	2/69	29/19594	0.00466641	0.0185518	0.0105429	CD74/HLA-DRA	2
CC	GO:0005774	vacuolar membrane	6/69	449/19594	0.00497027	0.0192894	0.010962	TLR9/CD74/CD68/HLA-DRA/C3AR1/P2RX4	6
CC	GO:0034774	secretory granule lumen	5/69	322/19594	0.00553495	0.0209813	0.0119235	TGFB1/PTPN6/MAPK1/RARRES2/THBS1	5
CC	GO:0060205	cytoplasmic vesicle lumen	5/69	325/19594	0.00575274	0.0213113	0.012111	TGFB1/PTPN6/MAPK1/RARRES2/THBS1	5
CC	GO:0031983	vesicle lumen	5/69	327/19594	0.00590126	0.0213757	0.0121476	TGFB1/PTPN6/MAPK1/RARRES2/THBS1	5
CC	GO:0098576	lumenal side of membrane	2/69	35/19594	0.00674637	0.0239056	0.0135854	CD74/HLA-DRA	2
CC	GO:0015629	actin cytoskeleton	6/69	499/19594	0.00819741	0.0284293	0.0161562	CD274/FYN/RAC2/HCK/AIF1/PTK2	6
CC	GO:0045335	phagocytic vesicle	3/69	138/19594	0.012768	0.0433579	0.02464	TLR9/RAC2/CTSS	3
CC	GO:0042101	T cell receptor complex	3/69	144/19594	0.0143055	0.0475876	0.0270437	CD3E/CD3D/PTPN6	3
MF	GO:0005126	cytokine receptor binding	12/68	272/18410	2.96497e-10	6.96769e-08	4.2446e-08	CXCL8/TGFB1/CXCL12/CD40LG/TLR9/TNFSF13B/CSF1/IL1B/CCL2/CCL5/CXCL10/TNF	12
MF	GO:0005125	cytokine activity	11/68	235/18410	9.38095e-10	1.10226e-07	6.71479e-08	CXCL8/TGFB1/CXCL12/CD40LG/TNFSF13B/CSF1/IL1B/CCL2/CCL5/CXCL10/TNF	11
MF	GO:0005178	integrin binding	9/68	156/18410	5.74526e-09	4.50045e-07	2.7416e-07	CXCL12/CD40LG/IL1B/ICAM1/ITGAM/ITGB2/THBS1/EMILIN1/PTK2	9
MF	GO:0048018	receptor ligand activity	13/68	489/18410	2.31318e-08	1.28515e-06	7.82889e-07	CXCL8/TGFB1/CXCL12/CD40LG/TNFSF13B/CSF1/IL1B/CCL2/CCL5/CXCL10/TNF/LGALS3/MDK	13
MF	GO:0030546	receptor activator activity	13/68	496/18410	2.73436e-08	1.28515e-06	7.82889e-07	CXCL8/TGFB1/CXCL12/CD40LG/TNFSF13B/CSF1/IL1B/CCL2/CCL5/CXCL10/TNF/LGALS3/MDK	13
MF	GO:0016004	phospholipase activator activity	4/68	14/18410	1.65694e-07	6.4897e-06	3.95341e-06	LCK/FYN/BTK/CCL5	4
MF	GO:0060229	lipase activator activity	4/68	16/18410	2.9959e-07	1.00577e-05	6.12695e-06	LCK/FYN/BTK/CCL5	4
MF	GO:0004715	non-membrane spanning protein tyrosine kinase activity	5/68	45/18410	6.45037e-07	1.8948e-05	1.15428e-05	LCK/FYN/HCK/BTK/PTK2	5
MF	GO:0008009	chemokine activity	5/68	49/18410	9.95334e-07	2.59893e-05	1.58322e-05	CXCL8/CXCL12/CCL2/CCL5/CXCL10	5
MF	GO:0140375	NA	7/68	148/18410	1.21076e-06	2.84529e-05	1.7333e-05	IL2RA/CD44/IL7R/CD74/FCER1G/HLA-DRA/C3AR1	7
MF	GO:0042608	T cell receptor binding	3/68	10/18410	5.67753e-06	0.000121293	7.38894e-05	CD3E/LCK/HLA-DRA	3
MF	GO:0042379	chemokine receptor binding	5/68	71/18410	6.38285e-06	0.000124997	7.61462e-05	CXCL8/CXCL12/CCL2/CCL5/CXCL10	5
MF	GO:0004713	protein tyrosine kinase activity	6/68	135/18410	1.0483e-05	0.0001895	0.00011544	KIT/LCK/FYN/HCK/BTK/PTK2	6
MF	GO:0042169	SH2 domain binding	4/68	41/18410	1.55505e-05	0.000261027	0.000159013	KIT/LCK/PTPN6/PTK2	4
MF	GO:0001784	phosphotyrosine residue binding	4/68	44/18410	2.06723e-05	0.000323866	0.000197293	LCK/HCK/PTPN6/MAPK1	4
MF	GO:0045236	CXCR chemokine receptor binding	3/68	18/18410	3.77979e-05	0.000555156	0.000338192	CXCL8/CXCL12/CXCL10	3
MF	GO:0045309	protein phosphorylated amino acid binding	4/68	55/18410	5.03739e-05	0.000696346	0.000424202	LCK/HCK/PTPN6/MAPK1	4
MF	GO:0019902	phosphatase binding	6/68	193/18410	7.83462e-05	0.0010013	0.000609975	STAT6/TP53/LCK/MAPK1/LGALS3/PTK2	6
MF	GO:0043274	phospholipase binding	3/68	23/18410	8.09563e-05	0.0010013	0.000609975	LCK/FYN/BTK	3
MF	GO:0043621	protein self-association	4/68	63/18410	8.60487e-05	0.00101107	0.000615928	TNFAIP3/TP53/CCL5/CD2	4
MF	GO:0043236	laminin binding	3/68	27/18410	0.000132301	0.00148051	0.000901904	CTSS/LGALS3/THBS1	3
MF	GO:0002020	protease binding	5/68	136/18410	0.000146654	0.00156653	0.000954303	CD28/TNFAIP3/TP53/KIT/TNF	5
MF	GO:0019955	cytokine binding	5/68	141/18410	0.000173653	0.00177428	0.00108086	IL2RA/TNFRSF1B/KIT/CD74/THBS1	5
MF	GO:0001968	fibronectin binding	3/68	31/18410	0.000201176	0.00189106	0.001152	IGFBP5/CTSS/THBS1	3
MF	GO:0005164	tumor necrosis factor receptor binding	3/68	31/18410	0.000201176	0.00189106	0.001152	CD40LG/TNFSF13B/TNF	3
MF	GO:0019903	protein phosphatase binding	5/68	148/18410	0.000217644	0.00195159	0.00118887	STAT6/TP53/LCK/LGALS3/PTK2	5
MF	GO:0005539	glycosaminoglycan binding	6/68	234/18410	0.000224225	0.00195159	0.00118887	CD44/CXCL8/PTPRC/CXCL10/THBS1/MDK	6
MF	GO:0051219	phosphoprotein binding	4/68	88/18410	0.000314316	0.00247034	0.00150489	LCK/HCK/PTPN6/MAPK1	4
MF	GO:0042056	chemoattractant activity	3/68	36/18410	0.000315363	0.00247034	0.00150489	CCL5/CXCL10/LGALS3	3
MF	GO:0043394	proteoglycan binding	3/68	36/18410	0.000315363	0.00247034	0.00150489	CTSS/PTPRC/THBS1	3
MF	GO:0008201	heparin binding	5/68	168/18410	0.000390738	0.00296205	0.00180443	CXCL8/PTPRC/CXCL10/THBS1/MDK	5
MF	GO:0004896	cytokine receptor activity	4/68	97/18410	0.000455539	0.00334536	0.00203794	IL2RA/CD44/IL7R/CD74	4
MF	GO:0001664	G protein-coupled receptor binding	6/68	288/18410	0.000675375	0.00480949	0.00292986	CXCL8/CXCL12/FYN/CCL2/CCL5/CXCL10	6
MF	GO:0032813	tumor necrosis factor receptor superfamily binding	3/68	49/18410	0.000786327	0.00543491	0.00331085	CD40LG/TNFSF13B/TNF	3
MF	GO:0050840	extracellular matrix binding	3/68	55/18410	0.00110214	0.00740007	0.00450799	CTSS/LGALS3/THBS1	3
MF	GO:0042277	peptide binding	6/68	322/18410	0.00120308	0.00785346	0.00478419	CD14/CD74/ITGAM/ITGB2/HLA-DRA/NFKBIA	6
MF	GO:0004712	protein serine/threonine/tyrosine kinase activity	7/68	446/18410	0.00126765	0.0080513	0.00490471	KIT/LCK/FYN/HCK/BTK/MAPK1/PTK2	7
MF	GO:0001846	opsonin binding	2/68	16/18410	0.00156011	0.00964804	0.00587742	ITGAM/ITGB2	2
MF	GO:0005001	transmembrane receptor protein tyrosine phosphatase activity	2/68	17/18410	0.00176391	0.0101102	0.00615898	PTPRC/PTPN6	2
MF	GO:0005149	interleukin-1 receptor binding	2/68	17/18410	0.00176391	0.0101102	0.00615898	TLR9/IL1B	2
MF	GO:0019198	transmembrane receptor protein phosphatase activity	2/68	17/18410	0.00176391	0.0101102	0.00615898	PTPRC/PTPN6	2
MF	GO:0005518	collagen binding	3/68	68/18410	0.0020346	0.0113841	0.00693497	CD44/CTSS/THBS1	3
MF	GO:0001848	complement binding	2/68	20/18410	0.00244673	0.0133717	0.0081458	ITGAM/ITGB2	2
MF	GO:0001618	virus receptor activity	3/68	76/18410	0.00279467	0.0149261	0.00909271	CD86/MRC1/ICAM1	3
MF	GO:0140272	NA	3/68	77/18410	0.00290035	0.0151463	0.00922683	CD86/MRC1/ICAM1	3
MF	GO:0008083	growth factor activity	4/68	162/18410	0.00303817	0.0152702	0.00930232	TGFB1/CXCL12/CSF1/MDK	4
MF	GO:1901681	sulfur compound binding	5/68	267/18410	0.0030613	0.0152702	0.00930232	CXCL8/PTPRC/CXCL10/THBS1/MDK	5
MF	GO:0038024	cargo receptor activity	3/68	79/18410	0.00311901	0.0152702	0.00930232	MRC1/ITGAM/ITGB2	3
MF	GO:0001540	amyloid-beta binding	3/68	81/18410	0.00334756	0.0160546	0.00978018	CD74/ITGAM/ITGB2	3
MF	GO:0019865	immunoglobulin binding	2/68	24/18410	0.00352052	0.0165464	0.0100798	FCER1G/LGALS3	2
MF	GO:0033218	amide binding	6/68	402/18410	0.00365489	0.0168412	0.0102593	CD14/CD74/ITGAM/ITGB2/HLA-DRA/NFKBIA	6
MF	GO:0003823	antigen binding	4/68	174/18410	0.00392233	0.0177259	0.0107983	IL7R/TGFB1/CD40/HLA-DRA	4
MF	GO:0038187	pattern recognition receptor activity	2/68	26/18410	0.00412586	0.0182939	0.0111443	CD14/TLR9	2
MF	GO:0023026	MHC class II protein complex binding	2/68	27/18410	0.00444534	0.0193455	0.0117849	CD74/HLA-DRA	2
MF	GO:0001227	DNA-binding transcription repressor activity, RNA polymerase II-specific	5/68	321/18410	0.00664532	0.0283936	0.0172969	TBX21/MYC/IRF8/TP53/SPI1	5
MF	GO:0001217	bacterial-type RNA polymerase transcriptional repressor activity, sequence-specific DNA binding	5/68	325/18410	0.00699335	0.029068	0.0177077	TBX21/MYC/IRF8/TP53/SPI1	5
MF	GO:0001228	DNA-binding transcription activator activity, RNA polymerase II-specific	6/68	462/18410	0.00712658	0.029068	0.0177077	TBX21/STAT6/IRF1/MYC/TP53/SPI1	6
MF	GO:0019887	protein kinase regulator activity	4/68	207/18410	0.00721635	0.029068	0.0177077	CD40LG/RAC2/CCL5/CXCL10	4
MF	GO:0097718	disordered domain specific binding	2/68	35/18410	0.00739371	0.029068	0.0177077	TP53/FYN	2
MF	GO:0001216	bacterial-type RNA polymerase transcriptional activator activity, sequence-specific DNA binding	6/68	466/18410	0.00742162	0.029068	0.0177077	TBX21/STAT6/IRF1/MYC/TP53/SPI1	6
MF	GO:0023023	MHC protein complex binding	2/68	36/18410	0.00781008	0.030088	0.0183291	CD74/HLA-DRA	2
MF	GO:0001046	core promoter sequence-specific DNA binding	2/68	42/18410	0.0105231	0.0398858	0.0242977	MYC/TP53	2
MF	GO:0017124	SH3 domain binding	3/68	125/18410	0.0111121	0.0409106	0.024922	CD3E/PTPN6/INPP5D	3
MF	GO:0019207	kinase regulator activity	4/68	235/18410	0.0111416	0.0409106	0.024922	CD40LG/RAC2/CCL5/CXCL10	4
MF	GO:0042578	phosphoric ester hydrolase activity	5/68	366/18410	0.0113273	0.0409527	0.0249477	LCK/PTPRC/PTPN6/INPP5D/CCL5	5
MF	GO:0015026	coreceptor activity	2/68	47/18410	0.0130565	0.045795	0.0278975	CD28/CD86	2
MF	GO:0048020	CCR chemokine receptor binding	2/68	47/18410	0.0130565	0.045795	0.0278975	CCL2/CCL5	2

## Sheet: KEGG
ID	Description	GeneRatio	BgRatio	pvalue	p.adjust	qvalue	geneID	Count
chx05340	Primary immunodeficiency	10/60	36/8909	1.94219e-14	3.43767e-12	1.43108e-12	CD3E/CD3D/IL7R/CD40LG/CD40/CD19/LCK/CD79A/PTPRC/BTK	10
chx05323	Rheumatoid arthritis	13/60	96/8909	3.90541e-14	3.45629e-12	1.43884e-12	CD28/CXCL8/TGFB1/CXCL12/CTLA4/TNFSF13B/CD86/CSF1/IL1B/CCL5/ICAM1/ITGB2/TNF	13
chx04064	NF-kappa B signaling pathway	13/60	104/8909	1.13767e-13	6.71224e-12	2.79427e-12	TNFAIP3/CXCL8/CD14/CXCL12/CD40LG/CD40/LCK/TNFSF13B/IL1B/BTK/ICAM1/NFKBIA/TNF	13
chx04640	Hematopoietic cell lineage	13/60	107/8909	1.65974e-13	7.34437e-12	3.05742e-12	CD3E/IL2RA/CD3D/CD44/IL7R/CD14/CD19/KIT/CSF1/IL1B/ITGAM/TNF/CD2	13
chx05144	Malaria	10/60	52/8909	1.1135e-12	3.94179e-11	1.64095e-11	CXCL8/TGFB1/CD40LG/TLR9/CD40/IL1B/ICAM1/ITGB2/TNF/THBS1	10
chx04660	T cell receptor signaling pathway	12/60	101/8909	2.06172e-12	6.08207e-11	2.53194e-11	CD3E/CD3D/CD28/CTLA4/CD40LG/LCK/FYN/PTPRC/PTPN6/NFKBIA/TNF/MAPK1	12
chx04620	Toll-like receptor signaling pathway	12/60	111/8909	6.48638e-12	1.64013e-10	6.82777e-11	CXCL8/CD14/IRF7/TLR9/CD40/CD86/IL1B/CCL5/CXCL10/NFKBIA/TNF/MAPK1	12
chx05169	Epstein-Barr virus infection	14/60	216/8909	1.03146e-10	2.2821e-09	9.50027e-10	CD3E/CD3D/CD44/TNFAIP3/MYC/IRF7/TP53/CD40/CD19/BTK/ICAM1/CXCL10/NFKBIA/TNF	14
chx04668	TNF signaling pathway	11/60	119/8909	2.9879e-10	5.76324e-09	2.39921e-09	TNFAIP3/TNFRSF1B/IRF1/CSF1/IL1B/CCL5/ICAM1/CXCL10/NFKBIA/TNF/MAPK1	11
chx05166	Human T-cell leukemia virus 1 infection	14/60	237/8909	3.54451e-10	5.76324e-09	2.39921e-09	CD3E/IL2RA/CD3D/MYC/TGFB1/TP53/CD40/LCK/SPI1/ICAM1/ITGB2/NFKBIA/TNF/MAPK1	14
chx04380	Osteoclast differentiation	11/60	121/8909	3.58167e-10	5.76324e-09	2.39921e-09	TGFB1/LCK/FYN/CSF1/IL1B/BTK/SPI1/TYROBP/NFKBIA/TNF/MAPK1	11
chx04662	B cell receptor signaling pathway	9/60	69/8909	6.32797e-10	9.33376e-09	3.8856e-09	CD19/CD79B/CD79A/RAC2/BTK/PTPN6/INPP5D/NFKBIA/MAPK1	9
chx04659	Th17 cell differentiation	10/60	107/8909	1.86395e-09	2.45702e-08	1.02284e-08	TBX21/CD3E/IL2RA/CD3D/STAT6/TGFB1/LCK/IL1B/NFKBIA/MAPK1	10
chx05133	Pertussis	9/60	78/8909	1.9434e-09	2.45702e-08	1.02284e-08	CXCL8/IRF1/CD14/IRF8/IL1B/ITGAM/ITGB2/TNF/MAPK1	9
chx05417	Lipid and atherosclerosis	13/60	229/8909	2.69869e-09	3.18446e-08	1.32567e-08	CXCL8/CD14/IRF7/CD40LG/TP53/CD40/IL1B/CCL5/ICAM1/NFKBIA/TNF/MAPK1/PTK2	13
chx05142	Chagas disease	10/60	113/8909	3.19341e-09	3.50887e-08	1.46072e-08	CD3E/CD3D/CXCL8/TGFB1/TLR9/IL1B/CCL5/NFKBIA/TNF/MAPK1	10
chx05152	Tuberculosis	12/60	189/8909	3.3701e-09	3.50887e-08	1.46072e-08	TGFB1/CD14/TLR9/CD74/IL1B/MRC1/CTSS/FCER1G/ITGAM/ITGB2/TNF/MAPK1	12
chx05235	PD-L1 expression and PD-1 checkpoint pathway in cancer	9/60	88/8909	5.78083e-09	5.68448e-08	2.36642e-08	CD3E/CD3D/CD28/CD274/TLR9/LCK/PTPN6/NFKBIA/MAPK1	9
chx04514	Cell adhesion molecules	11/60	168/8909	1.19062e-08	1.10916e-07	4.61736e-08	CD28/CD274/CTLA4/CD40LG/CD40/CD86/PTPRC/ICAM1/ITGAM/ITGB2/CD2	11
chx05416	Viral myocarditis	8/60	69/8909	1.58661e-08	1.40415e-07	5.8454e-08	CD28/CD40LG/CD40/FYN/CD86/RAC2/ICAM1/ITGB2	8
chx04672	Intestinal immune network for IgA production	7/60	47/8909	2.23512e-08	1.88389e-07	7.84254e-08	CD28/TGFB1/CXCL12/CD40LG/CD40/TNFSF13B/CD86	7
chx05140	Leishmaniasis	8/60	75/8909	3.10266e-08	2.49623e-07	1.03917e-07	TGFB1/IL1B/PTPN6/ITGAM/ITGB2/NFKBIA/TNF/MAPK1	8
chx05162	Measles	10/60	145/8909	3.59482e-08	2.66855e-07	1.11091e-07	CD3E/IL2RA/CD3D/CD28/TNFAIP3/IRF7/TP53/TLR9/IL1B/NFKBIA	10
chx04060	Cytokine-cytokine receptor interaction	14/60	339/8909	3.61838e-08	2.66855e-07	1.11091e-07	IL2RA/IL7R/TNFRSF1B/CXCL8/TGFB1/CXCL12/CD40LG/CD40/TNFSF13B/CSF1/IL1B/CCL5/CXCL10/TNF	14
chx04650	Natural killer cell mediated cytotoxicity	10/60	156/8909	7.21948e-08	5.11139e-07	2.12785e-07	LCK/FYN/RAC2/PTPN6/ICAM1/FCER1G/ITGB2/TYROBP/TNF/MAPK1	10
chx05134	Legionellosis	7/60	60/8909	1.28239e-07	8.64152e-07	3.59742e-07	CXCL8/CD14/IL1B/ITGAM/ITGB2/NFKBIA/TNF	7
chx04658	Th1 and Th2 cell differentiation	8/60	90/8909	1.3182e-07	8.64152e-07	3.59742e-07	TBX21/CD3E/IL2RA/CD3D/STAT6/LCK/NFKBIA/MAPK1	8
chx04664	Fc epsilon RI signaling pathway	7/60	65/8909	2.25205e-07	1.42362e-06	5.92646e-07	FYN/RAC2/BTK/INPP5D/FCER1G/TNF/MAPK1	7
chx04061	Viral protein interaction with cytokine and cytokine receptor	8/60	100/8909	3.00355e-07	1.8332e-06	7.63152e-07	IL2RA/TNFRSF1B/CXCL8/CXCL12/CSF1/CCL5/CXCL10/TNF	8
chx05163	Human cytomegalovirus infection	11/60	242/8909	5.00842e-07	2.95497e-06	1.23014e-06	CXCL8/MYC/CXCL12/TP53/RAC2/IL1B/CCL5/NFKBIA/TNF/MAPK1/PTK2	11
chx05146	Amoebiasis	8/60	119/8909	1.14622e-06	6.54453e-06	2.72445e-06	CXCL8/TGFB1/CD14/IL1B/ITGAM/ITGB2/TNF/PTK2	8
chx05161	Hepatitis B	9/60	166/8909	1.42675e-06	7.89169e-06	3.28527e-06	STAT6/CXCL8/MYC/TGFB1/IRF7/TP53/NFKBIA/TNF/MAPK1	9
chx05164	Influenza A	9/60	177/8909	2.43391e-06	1.30546e-05	5.43456e-06	CXCL8/IRF7/IL1B/CCL5/ICAM1/CXCL10/NFKBIA/TNF/MAPK1	9
chx04657	IL-17 signaling pathway	7/60	93/8909	2.64724e-06	1.37812e-05	5.73705e-06	TNFAIP3/CXCL8/IL1B/CXCL10/NFKBIA/TNF/MAPK1	7
chx04062	Chemokine signaling pathway	9/60	188/8909	4.00318e-06	2.02447e-05	8.42775e-06	CXCL8/CXCL12/RAC2/HCK/CCL5/CXCL10/NFKBIA/MAPK1/PTK2	9
chx05135	Yersinia infection	8/60	143/8909	4.58083e-06	2.25224e-05	9.37597e-06	CXCL8/LCK/RAC2/IL1B/NFKBIA/TNF/MAPK1/PTK2	8
chx05219	Bladder cancer	5/60	39/8909	5.64859e-06	2.70216e-05	1.1249e-05	CXCL8/MYC/TP53/MAPK1/THBS1	5
chx05221	Acute myeloid leukemia	6/60	69/8909	6.23443e-06	2.89336e-05	1.20449e-05	MYC/CD14/KIT/SPI1/ITGAM/MAPK1	6
chx05202	Transcriptional misregulation in cancer	9/60	199/8909	6.37519e-06	2.89336e-05	1.20449e-05	CXCL8/MYC/CD14/TP53/CD40/CD86/SPI1/ITGAM/PTK2	9
chx05167	Kaposi sarcoma-associated herpesvirus infection	9/60	208/8909	9.13057e-06	4.04028e-05	1.68195e-05	CXCL8/MYC/IRF7/TP53/CD86/HCK/ICAM1/NFKBIA/MAPK1	9
chx05205	Proteoglycans in cancer	9/60	210/8909	9.86521e-06	4.25888e-05	1.77295e-05	CD44/MYC/TGFB1/TP53/PTPN6/TNF/MAPK1/THBS1/PTK2	9
chx04621	NOD-like receptor signaling pathway	8/60	178/8909	2.2876e-05	9.64062e-05	4.01334e-05	TNFAIP3/CXCL8/IRF7/IL1B/CCL5/NFKBIA/TNF/MAPK1	8
chx04010	MAPK signaling pathway	10/60	295/8909	2.36348e-05	9.72876e-05	4.05003e-05	MYC/TGFB1/CD14/TP53/KIT/CSF1/RAC2/IL1B/TNF/MAPK1	10
chx05330	Allograft rejection	5/60	55/8909	3.14303e-05	0.000126435	5.26344e-05	CD28/CD40LG/CD40/CD86/TNF	5
chx05310	Asthma	4/60	28/8909	3.37295e-05	0.000132669	5.52295e-05	CD40LG/CD40/FCER1G/TNF	4
chx05132	Salmonella infection	9/60	261/8909	5.53551e-05	0.000212997	8.86695e-05	CXCL8/MYC/CD14/TLR9/IL1B/PTPRC/NFKBIA/TNF/MAPK1	9
chx04625	C-type lectin receptor signaling pathway	6/60	102/8909	5.89761e-05	0.000222101	9.24597e-05	IRF1/IL1B/FCER1G/NFKBIA/TNF/MAPK1	6
chx04623	Cytosolic DNA-sensing pathway	5/60	64/8909	6.57697e-05	0.000242526	0.000100962	IRF7/IL1B/CCL5/CXCL10/NFKBIA	5
chx05321	Inflammatory bowel disease	5/60	65/8909	7.08851e-05	0.000256054	0.000106594	TBX21/STAT6/TGFB1/IL1B/TNF	5
chx04933	AGE-RAGE signaling pathway in diabetic complications	6/60	107/8909	7.7121e-05	0.000273008	0.000113652	CXCL8/TGFB1/IL1B/ICAM1/TNF/MAPK1	6
chx05320	Autoimmune thyroid disease	5/60	68/8909	8.80887e-05	0.00030572	0.00012727	CD28/CTLA4/CD40LG/CD40/CD86	5
chx05160	Hepatitis C	7/60	160/8909	9.17764e-05	0.000312393	0.000130048	MYC/IRF7/TP53/CXCL10/NFKBIA/TNF/MAPK1	7
chx04670	Leukocyte transendothelial migration	6/60	113/8909	0.000104503	0.000349001	0.000145287	CXCL12/RAC2/ICAM1/ITGAM/ITGB2/PTK2	6
chx05145	Toxoplasmosis	6/60	114/8909	0.000109736	0.000359691	0.000149738	TGFB1/CD40LG/CD40/NFKBIA/TNF/MAPK1	6
chx05143	African trypanosomiasis	4/60	39/8909	0.000128209	0.000412599	0.000171763	TLR9/IL1B/ICAM1/TNF	4
chx05170	Human immunodeficiency virus 1 infection	8/60	231/8909	0.000144707	0.00045238	0.000188324	CD3E/CD3D/TNFRSF1B/RAC2/NFKBIA/TNF/MAPK1/PTK2	8
chx04071	Sphingolipid signaling pathway	6/60	120/8909	0.000145682	0.00045238	0.000188324	TP53/FYN/RAC2/FCER1G/TNF/MAPK1	6
chx04151	PI3K-Akt signaling pathway	10/60	369/8909	0.0001555	0.000474543	0.00019755	IL2RA/IL7R/MYC/TP53/CD19/KIT/CSF1/MAPK1/THBS1/PTK2	10
chx05220	Chronic myeloid leukemia	5/60	78/8909	0.00016946	0.00050838	0.000211636	MYC/TGFB1/TP53/NFKBIA/MAPK1	5
chx05210	Colorectal cancer	5/60	89/8909	0.000314881	0.000928898	0.000386696	MYC/TGFB1/TP53/RAC2/MAPK1	5
chx05418	Fluid shear stress and atherosclerosis	6/60	144/8909	0.000392293	0.00113829	0.000473865	TP53/RAC2/IL1B/ICAM1/TNF/PTK2	6
chx04350	TGF-beta signaling pathway	5/60	96/8909	0.000447326	0.00127704	0.000531627	MYC/TGFB1/TNF/MAPK1/THBS1	5
chx04666	Fc gamma R-mediated phagocytosis	5/60	97/8909	0.000469224	0.00131829	0.000548799	RAC2/PTPRC/HCK/INPP5D/MAPK1	5
chx04015	Rap1 signaling pathway	7/60	211/8909	0.000503679	0.00139299	0.000579893	KIT/CSF1/RAC2/ITGAM/ITGB2/MAPK1/THBS1	7
chx04936	Alcoholic liver disease	6/60	152/8909	0.00052346	0.00142542	0.000593396	CXCL8/CD14/IL1B/NFKBIA/TNF/C3AR1	6
chx04622	RIG-I-like receptor signaling pathway	5/60	106/8909	0.000704558	0.0018895	0.000786588	CXCL8/IRF7/CXCL10/NFKBIA/TNF	5
chx04940	Type I diabetes mellitus	4/60	62/8909	0.000774819	0.00204691	0.000852118	CD28/CD86/IL1B/TNF	4
chx05332	Graft-versus-host disease	4/60	64/8909	0.000873714	0.00227422	0.000946748	CD28/CD86/IL1B/TNF	4
chx04145	Phagosome	6/60	168/8909	0.000886669	0.0022745	0.000946862	CD14/MRC1/CTSS/ITGAM/ITGB2/THBS1	6
chx05230	Central carbon metabolism in cancer	4/60	68/8909	0.00109768	0.00277556	0.00115545	MYC/TP53/KIT/MAPK1	4
chx04520	Adherens junction	4/60	71/8909	0.00129012	0.00321623	0.0013389	FYN/RAC2/PTPN6/MAPK1	4
chx05212	Pancreatic cancer	4/60	78/8909	0.00182887	0.00449597	0.00187165	TGFB1/TP53/RAC2/MAPK1	4
chx05216	Thyroid cancer	3/60	37/8909	0.00191752	0.00464934	0.0019355	MYC/TP53/MAPK1	3
chx04072	Phospholipase D signaling pathway	5/60	147/8909	0.00300967	0.00719882	0.00299683	CXCL8/KIT/FYN/FCER1G/MAPK1	5
chx04210	Apoptosis	5/60	150/8909	0.00328347	0.007749	0.00322587	TP53/CTSS/NFKBIA/TNF/MAPK1	5
chx05150	Staphylococcus aureus infection	4/60	92/8909	0.00334072	0.00776642	0.00323312	ICAM1/ITGAM/ITGB2/C3AR1	4
chx05322	Systemic lupus erythematosus	5/60	151/8909	0.00337861	0.00776642	0.00323312	CD28/CD40LG/CD40/CD86/TNF	5
chx04810	Regulation of actin cytoskeleton	6/60	220/8909	0.00348848	0.00791616	0.00329546	CXCL12/RAC2/ITGAM/ITGB2/MAPK1/PTK2	6
chx05222	Small cell lung cancer	4/60	96/8909	0.00389337	0.00862788	0.00359174	MYC/TP53/NFKBIA/PTK2	4
chx05171	Coronavirus disease - COVID-19	7/60	301/8909	0.00389961	0.00862788	0.00359174	CXCL8/IL1B/CXCL10/NFKBIA/TNF/MAPK1/C3AR1	7
chx04218	Cellular senescence	5/60	166/8909	0.00505566	0.0110476	0.00459904	CXCL8/MYC/TGFB1/TP53/MAPK1	5
chx04370	VEGF signaling pathway	3/60	56/8909	0.00624918	0.0134891	0.00561543	RAC2/MAPK1/PTK2	3
chx05213	Endometrial cancer	3/60	58/8909	0.0068904	0.014694	0.00611703	MYC/TP53/MAPK1	3
chx04360	Axon guidance	5/60	180/8909	0.00709029	0.0149403	0.00621955	CXCL12/FYN/RAC2/MAPK1/PTK2	5
chx05168	Herpes simplex virus 1 infection	8/60	442/8909	0.00912151	0.0189942	0.00790719	IRF7/TP53/TLR9/CD74/IL1B/CCL5/NFKBIA/TNF	8
chx05020	Prion disease	6/60	271/8909	0.00948315	0.0195176	0.0081251	FYN/RAC2/IL1B/CCL5/TNF/MAPK1	6
chx04611	Platelet activation	4/60	128/8909	0.0106645	0.0216967	0.00903221	FYN/BTK/FCER1G/MAPK1	4
chx04920	Adipocytokine signaling pathway	3/60	71/8909	0.0120006	0.0239539	0.00997189	TNFRSF1B/NFKBIA/TNF	3
chx04510	Focal adhesion	5/60	205/8909	0.0120446	0.0239539	0.00997189	FYN/RAC2/MAPK1/THBS1/PTK2	5
chx04630	JAK-STAT signaling pathway	5/60	207/8909	0.0125218	0.0246263	0.0102518	IL2RA/STAT6/IL7R/MYC/PTPN6	5
chx05224	Breast cancer	4/60	150/8909	0.0181642	0.0353304	0.0147079	MYC/TP53/KIT/MAPK1	4
chx05226	Gastric cancer	4/60	152/8909	0.0189744	0.0365051	0.0151969	MYC/TGFB1/TP53/MAPK1	4
chx04012	ErbB signaling pathway	3/60	85/8909	0.0194117	0.0365517	0.0152163	MYC/MAPK1/PTK2	3
chx04612	Antigen processing and presentation	3/60	85/8909	0.0194117	0.0365517	0.0152163	CD74/CTSS/TNF	3
chx04932	Non-alcoholic fatty liver disease	4/60	157/8909	0.0210974	0.0393077	0.0163636	CXCL8/TGFB1/IL1B/TNF	4
chx04610	Complement and coagulation cascades	3/60	93/8909	0.0245608	0.0452839	0.0188515	ITGAM/ITGB2/C3AR1	3
chx01522	Endocrine resistance	3/60	96/8909	0.0266642	0.0486553	0.020255	TP53/MAPK1/PTK2	3
chx04217	Necroptosis	4/60	170/8909	0.0272828	0.0489633	0.0203832	STAT6/TNFAIP3/IL1B/TNF	4
chx05215	Prostate cancer	3/60	97/8909	0.0273862	0.0489633	0.0203832	TP53/NFKBIA/MAPK1	3
chx05206	MicroRNAs in cancer	5/60	258/8909	0.0293656	0.0519772	0.0216378	CD44/MYC/TP53/MAPK1/THBS1	5
chx05225	Hepatocellular carcinoma	4/60	175/8909	0.029923	0.0524392	0.0218302	MYC/TGFB1/TP53/MAPK1	4
chx05165	Human papillomavirus infection	6/60	356/8909	0.0318704	0.0553045	0.023023	IRF1/TP53/TNF/MAPK1/THBS1/PTK2	6
chx01523	Antifolate resistance	2/60	44/8909	0.0352123	0.0605105	0.0251902	IL1B/TNF	2
chx04930	Type II diabetes mellitus	2/60	46/8909	0.0381981	0.0650102	0.0270634	TNF/MAPK1	2
chx04722	Neurotrophin signaling pathway	3/60	121/8909	0.0478069	0.0805888	0.0335487	TP53/NFKBIA/MAPK1	3
chx04919	Thyroid hormone signaling pathway	3/60	122/8909	0.0487841	0.0808651	0.0336637	MYC/TP53/MAPK1	3
chx04613	Neutrophil extracellular trap formation	4/60	205/8909	0.0488846	0.0808651	0.0336637	RAC2/ITGAM/ITGB2/MAPK1	4
chx04068	FoxO signaling pathway	3/60	129/8909	0.0558977	0.0907697	0.037787	IL7R/TGFB1/MAPK1	3
chx04110	Cell cycle	3/60	129/8909	0.0558977	0.0907697	0.037787	MYC/TGFB1/TP53	3
chx05203	Viral carcinogenesis	4/60	221/8909	0.0611961	0.0976956	0.0406702	IRF7/TP53/NFKBIA/MAPK1	4
chx04926	Relaxin signaling pathway	3/60	134/8909	0.0612667	0.0976956	0.0406702	TGFB1/NFKBIA/MAPK1	3
chx04014	Ras signaling pathway	4/60	238/8909	0.0759241	0.119987	0.0499501	KIT/CSF1/RAC2/MAPK1	4
chx05211	Renal cell carcinoma	2/60	69/8909	0.0785453	0.123031	0.0512172	TGFB1/MAPK1	2
chx05218	Melanoma	2/60	72/8909	0.0845028	0.130061	0.0541437	TP53/MAPK1	2
chx05223	Non-small cell lung cancer	2/60	72/8909	0.0845028	0.130061	0.0541437	TP53/MAPK1	2
chx05214	Glioma	2/60	74/8909	0.0885493	0.134461	0.0559753	TP53/MAPK1	2
chx04390	Hippo signaling pathway	3/60	157/8909	0.0888808	0.134461	0.0559753	MYC/TGFB1/ITGB2	3
chx01524	Platinum drug resistance	2/60	80/8909	0.101023	0.151535	0.0630833	TP53/MAPK1	2
chx04917	Prolactin signaling pathway	2/60	81/8909	0.103148	0.153422	0.0638689	IRF1/MAPK1	2
chx04310	Wnt signaling pathway	3/60	171/8909	0.107845	0.159072	0.0662209	MYC/TP53/RAC2	3
chx04115	p53 signaling pathway	2/60	85/8909	0.11177	0.163498	0.0680634	TP53/THBS1	2
chx05410	Hypertrophic cardiomyopathy	2/60	91/8909	0.12504	0.18141	0.0755202	TGFB1/TNF	2
chx05414	Dilated cardiomyopathy	2/60	95/8909	0.13409	0.192958	0.0803275	TGFB1/TNF	2
chx04512	ECM-receptor interaction	2/60	96/8909	0.136375	0.194665	0.0810379	CD44/THBS1	2
chx05231	Choline metabolism in cancer	2/60	98/8909	0.140973	0.199617	0.0830998	RAC2/MAPK1	2
chx04916	Melanogenesis	2/60	100/8909	0.145604	0.204539	0.0851486	KIT/MAPK1	2
chx04725	Cholinergic synapse	2/60	111/8909	0.171606	0.239167	0.0995639	FYN/MAPK1	2
chx04931	Insulin resistance	2/60	113/8909	0.176416	0.243951	0.101556	NFKBIA/TNF	2
chx04935	Growth hormone synthesis, secretion and action	2/60	118/8909	0.188537	0.25869	0.107691	MAPK1/PTK2	2
chx05208	Chemical carcinogenesis - reactive oxygen species	3/60	237/8909	0.213829	0.289501	0.120518	NFKBIA/MAPK1/PTK2	3
chx04024	cAMP signaling pathway	3/60	238/8909	0.215589	0.289501	0.120518	RAC2/NFKBIA/MAPK1	3
chx05022	Pathways of neurodegeneration - multiple diseases	5/60	476/8909	0.215899	0.289501	0.120518	TNFRSF1B/CSF1/IL1B/TNF/MAPK1	5
chx04960	Aldosterone-regulated sodium reabsorption	1/60	38/8909	0.226882	0.30194	0.125696	MAPK1	1
chx04142	Lysosome	2/60	138/8909	0.23797	0.314333	0.130855	CD68/CTSS	2
chx04550	Signaling pathways regulating pluripotency of stem cells	2/60	143/8909	0.250472	0.328397	0.13671	MYC/MAPK1	2
chx05010	Alzheimer disease	4/60	387/8909	0.263087	0.342399	0.142539	CSF1/IL1B/TNF/MAPK1	4
chx04216	Ferroptosis	1/60	48/8909	0.277634	0.358695	0.149323	TP53	1
chx04150	mTOR signaling pathway	2/60	159/8909	0.290567	0.372684	0.155146	TNF/MAPK1	2
chx04730	Long-term depression	1/60	60/8909	0.334227	0.425598	0.177174	MAPK1	1
chx05217	Basal cell carcinoma	1/60	63/8909	0.347679	0.439566	0.182989	TP53	1
chx04929	GnRH secretion	1/60	64/8909	0.352104	0.442002	0.184003	MAPK1	1
chx04720	Long-term potentiation	1/60	66/8909	0.360864	0.44981	0.187254	MAPK1	1
chx00562	Inositol phosphate metabolism	1/60	72/8909	0.386453	0.475016	0.197747	INPP5D	1
chx04137	Mitophagy - animal	1/60	72/8909	0.386453	0.475016	0.197747	TP53	1
chx05100	Bacterial invasion of epithelial cells	1/60	78/8909	0.411034	0.501745	0.208874	PTK2	1
chx01521	EGFR tyrosine kinase inhibitor resistance	1/60	80/8909	0.419011	0.507979	0.211469	MAPK1	1
chx05415	Diabetic cardiomyopathy	2/60	219/8909	0.436256	0.524501	0.218347	TGFB1/RAC2	2
chx05207	Chemical carcinogenesis - receptor activation	2/60	220/8909	0.438566	0.524501	0.218347	MYC/MAPK1	2
chx04540	Gap junction	1/60	88/8909	0.449868	0.534407	0.222471	MAPK1	1
chx04211	Longevity regulating pathway	1/60	89/8909	0.45361	0.535259	0.222826	TP53	1
chx05014	Amyotrophic lateral sclerosis	3/60	372/8909	0.46072	0.537578	0.223791	TNFRSF1B/TP53/TNF	3
chx04912	GnRH signaling pathway	1/60	92/8909	0.464686	0.537578	0.223791	MAPK1	1
chx04914	Progesterone-mediated oocyte maturation	1/60	92/8909	0.464686	0.537578	0.223791	MAPK1	1
chx04070	Phosphatidylinositol signaling system	1/60	97/8909	0.482658	0.554743	0.230937	INPP5D	1
chx04713	Circadian entrainment	1/60	98/8909	0.486181	0.555187	0.231121	MAPK1	1
chx04928	Parathyroid hormone synthesis, secretion and action	1/60	106/8909	0.513525	0.582653	0.242555	MAPK1	1
chx04724	Glutamatergic synapse	1/60	111/8909	0.529882	0.596983	0.248521	MAPK1	1
chx04066	HIF-1 signaling pathway	1/60	112/8909	0.533089	0.596983	0.248521	MAPK1	1
chx04750	Inflammatory mediator regulation of TRP channels	1/60	113/8909	0.536273	0.596983	0.248521	IL1B	1
chx04114	Oocyte meiosis	1/60	123/8909	0.566967	0.623312	0.259481	MAPK1	1
chx04726	Serotonergic synapse	1/60	123/8909	0.566967	0.623312	0.259481	MAPK1	1
chx04915	Estrogen signaling pathway	1/60	136/8909	0.603898	0.659815	0.274678	MAPK1	1
chx04371	Apelin signaling pathway	1/60	139/8909	0.611971	0.660481	0.274955	MAPK1	1
chx04910	Insulin signaling pathway	1/60	139/8909	0.611971	0.660481	0.274955	MAPK1	1
chx04140	Autophagy - animal	1/60	145/8909	0.627634	0.665216	0.276926	MAPK1	1
chx04270	Vascular smooth muscle contraction	1/60	145/8909	0.627634	0.665216	0.276926	MAPK1	1
chx04723	Retrograde endocannabinoid signaling	1/60	145/8909	0.627634	0.665216	0.276926	MAPK1	1
chx04261	Adrenergic signaling in cardiomyocytes	1/60	151/8909	0.642674	0.677103	0.281875	MAPK1	1
chx04921	Oxytocin signaling pathway	1/60	153/8909	0.647554	0.678207	0.282334	MAPK1	1
chx04934	Cushing syndrome	1/60	155/8909	0.652368	0.67923	0.28276	MAPK1	1
chx04022	cGMP-PKG signaling pathway	1/60	168/8909	0.68212	0.706054	0.293927	MAPK1	1
chx04080	Neuroactive ligand-receptor interaction	2/60	377/8909	0.728288	0.749459	0.311996	C3AR1/P2RX4	2
chx05034	Alcoholism	1/60	203/8909	0.750333	0.767682	0.319582	MAPK1	1
chx04020	Calcium signaling pathway	1/60	238/8909	0.8041	0.817964	0.340514	P2RX4	1
chx04144	Endocytosis	1/60	255/8909	0.825931	0.83537	0.34776	IL2RA	1
chx05012	Parkinson disease	1/60	271/8909	0.844283	0.84908	0.353468	TP53	1
chx05016	Huntington disease	1/60	307/8909	0.878902	0.878902	0.365883	TP53	1
