# Supplementary material for: Transcriptome Analysis of Goat Mammary Gland Tissue Reveals the Adaptive Strategies and Molecular Mechanisms of Lactation and Involution
Source: Int J Mol Sci. 2022 Nov 20;23(22):14424. doi: 10.3390/ijms232214424 (PMC9693614; doi:10.3390/ijms232214424)
Supplement: Supplementary file 1 [file ijms-23-14424-s001.zip › Table S11.xlsx]

## Sheet: gene
ID	CAT
FN1	hub
CTNNB1	hub
COL1A1	hub
ITGB1	hub
PTK2	hub
MMP2	hub
MYC	hub
MMP9	hub
PDGFRB	hub
TIMP1	gene
TNF	gene
CCND1	gene
TGFB1	gene
PTPRC	gene
THBS1	gene
FYN	gene
SMAD2	gene
SPP1	gene
PDGFRA	gene
SERPINE1	gene
KIT	gene
SHC1	gene
TP53	gene
LOX	gene
CSF1	gene
FGFR1	gene
MAPK1	gene
FOS	gene
FGF7	gene
COL4A1	gene
PIK3CD	gene
SOCS3	gene
ITGA4	gene
ITGA5	gene
RAC2	gene
ITGB2	gene
COL6A2	gene
COL6A3	gene
TGFB3	gene
SMAD3	gene
HBEGF	gene
ITGA2	gene
AXIN1	gene
LEF1	gene
THBS2	gene
DVL1	gene
CCL5	gene
ITGA6	gene
ERBB3	gene
JAK3	gene
ITGB4	gene
IGF1R	gene
BMP4	gene
IL2RG	gene
ITGB7	gene
SNAI2	gene
IL7R	gene
MMP14	gene
MMP7	gene
AXIN2	gene
IL2RA	gene
VEGFC	gene
STAT5A	gene
STAT6	gene
CD19	gene
CDC42	gene
LAMA4	gene
PTK2B	gene
TGFBR2	gene
PIK3CG	gene
PRKCB	gene
SOX9	gene
EPHA2	gene
GNG2	gene
AXL	gene
LAMC2	gene
ADAMTS4	gene
RAF1	gene
GNB1	gene
FZD7	gene
IL7	gene
LAMA5	gene
MMP25	gene
COL12A1	gene
DVL3	gene
TGM2	gene
LAMA3	gene
RAC3	gene
WWTR1	gene
IL10RA	gene
GNB3	gene
THBS3	gene
ANGPT2	gene
FZD1	gene
FZD4	gene
WNT4	gene
CSNK1D	gene
CTSS	gene
YWHAZ	gene
FLT3LG	gene
THBS4	gene
CTSK	gene
SFRP1	gene
RUNX1	gene
MMP11	gene
LTBP3	gene
CHRM1	gene
ENSCHIP00000026821	gene
FZD6	gene
TGFB2	gene
INPP5D	gene
CSF3R	gene
FBLN5	gene
COL14A1	gene
TNFRSF1B	gene
MAPK12	gene
IL3RA	gene
FURIN	gene
VEGFB	gene
PPP2R1B	gene
FZD3	gene
TNFAIP3	gene
PIK3R5	gene
OSMR	gene
ARRB1	gene
WNT7B	gene
TSC2	gene
SMAD1	gene
PPP2R2B	gene
RELB	gene
NFKB2	gene
IFNAR2	gene
PPP1CB	gene
NID2	gene
MMP16	gene
EFEMP2	gene
WNT6	gene
TCF7	gene
GAS6	gene
MITF	gene
SHC2	gene
IL1R1	gene
PRLR	gene
EFNA1	gene
SOCS2	gene
ADAMTS7	gene
FBLN1	gene
ANGPT4	gene
CDKN1A	gene
TCF7L2	gene
FBXW11	gene
PTX3	gene
DUSP1	gene
LPAR1	gene
ACTB	gene
HCLS1	gene
BMPR1A	gene
PIK3AP1	gene
MFAP4	gene
DLG4	gene
LPAR3	gene
CRTAP	gene
PDPN	gene
S1PR1	gene
SOCS5	gene
ANTXR1	gene
MMP19	gene
EFNA4	gene
RPS6KA3	gene
TNXB	gene
MMP28	gene
PTH1R	gene
BCL3	gene
BIRC5	gene
NMI	gene
LPAR5	gene
COL27A1	gene
SERPINF2	gene
TEAD1	gene
DPT	gene
MAX	gene
LRP1	gene
YWHAQ	gene
FSCN1	gene
FKBP10	gene
CREB5	gene
PRKAA1	gene
TEAD2	gene
TRAF2	gene
AEBP1	gene
BAD	gene
BAX	gene
ID1	gene
PTPN7	gene
FRMD6	gene
ADAMTS18	gene
CAPN1	gene
CRISPLD2	gene
DCHS1	gene
SULF1	gene
DLG1	gene
FLOT1	gene
ADAM8	gene
PAPLN	gene
TMEM119	gene
FOXF1	gene
NF2	gene
SPHK2	gene
PATJ	gene
GREM1	gene
GADD45A	gene
SH3PXD2B	gene
MAP4K1	gene
INPP5F	gene
PDK4	gene
BBC3	gene
MAGI1	gene
ID2	gene
UBASH3B	gene
ANXA2	gene
SYT7	gene
ELF3	gene
P3H4	gene
MOB1B	gene
PPM1B	gene
SULF2	gene

## Sheet: network
SUID	AverageShortestPathLength	BetweennessCentrality	ClosenessCentrality	ClusteringCoefficient	Degree	Eccentricity	IsSingleNode	name	NeighborhoodConnectivity	NumberOfDirectedEdges	NumberOfUndirectedEdges	PartnerOfMultiEdgedNodePairs	Radiality	selected	SelfLoops	shared name	Stress	TopologicalCoefficient
72	2.28444	0.000392	0.437743	0.527273	11	4	FALSE	ACTB	39.0909	11	0	0	0.743111	FALSE	0	ACTB	414	0.255496
73	2.11556	0.0034555	0.472689	0.535632	30	3	FALSE	ITGB4	33.8	30	0	0	0.776889	FALSE	0	ITGB4	2752	0.2
75	1.85333	0.026936	0.539568	0.290612	50	3	FALSE	TNF	31.8	50	0	0	0.829333	FALSE	0	TNF	16448	0.152885
77	1.78222	0.0318095	0.561097	0.293269	65	3	FALSE	ITGB1	32.7538	65	0	0	0.843556	FALSE	0	ITGB1	20462	0.156717
79	2.11111	0.00310523	0.473684	0.522581	31	3	FALSE	ITGA6	35.1935	31	0	0	0.777778	FALSE	0	ITGA6	2796	0.208246
81	1.67556	0.0968476	0.596817	0.193557	85	3	FALSE	CTNNB1	27.3059	85	0	0	0.864889	FALSE	0	CTNNB1	48466	0.128197
83	2.23556	0.00500344	0.447316	0.4	11	4	FALSE	HCLS1	35.2727	11	0	0	0.752889	FALSE	0	HCLS1	2434	0.214523
85	2.03111	0.00545034	0.492341	0.47395	35	3	FALSE	ITGA4	34.1429	35	0	0	0.793778	FALSE	0	ITGA4	4718	0.186573
87	2.11556	0.00352678	0.472689	0.505882	35	3	FALSE	ITGA5	35.0857	35	0	0	0.776889	FALSE	0	ITGA5	2714	0.213937
89	2.04889	0.00365404	0.488069	0.578818	29	3	FALSE	ITGB7	36.7586	29	0	0	0.790222	FALSE	0	ITGB7	3420	0.198695
91	2.00889	0.0057119	0.497788	0.507576	33	3	FALSE	ITGA2	37.0303	33	0	0	0.798222	FALSE	0	ITGA2	4972	0.194896
93	2.06667	0.0113393	0.483871	0.286154	26	4	FALSE	CDC42	31.4615	26	0	0	0.786667	FALSE	0	CDC42	6936	0.169148
95	2.53778	7.86e-05	0.394046	0.333333	4	4	FALSE	ADAM8	39.75	4	0	0	0.692444	FALSE	0	ADAM8	94	0.385922
96	1.91556	0.0277742	0.522042	0.306184	52	3	FALSE	TIMP1	31.5769	52	0	0	0.816889	FALSE	0	TIMP1	16808	0.165224
99	2.05333	0.0100599	0.487013	0.365419	34	4	FALSE	ITGB2	32.6765	34	0	0	0.789333	FALSE	0	ITGB2	6670	0.181536
101	2.58667	0.000794	0.386598	0.357143	8	4	FALSE	MMP28	31.875	8	0	0	0.682667	FALSE	0	MMP28	394	0.32732
103	2.79111	0.000366	0.35828	0.7	5	4	FALSE	ADAMTS18	23.6	5	0	0	0.641778	FALSE	0	ADAMTS18	390	0.363077
104	2.48444	0.00185289	0.402504	0.454545	12	4	FALSE	ADAMTS7	29.4167	12	0	0	0.703111	FALSE	0	ADAMTS7	1716	0.262649
106	3.12444	7.58e-05	0.320057	0.333333	4	5	FALSE	PAPLN	12.25	4	0	0	0.575111	FALSE	0	PAPLN	32	0.363636
108	2.13333	0.00484269	0.46875	0.560484	32	3	FALSE	THBS2	36.8125	32	0	0	0.773333	FALSE	0	THBS2	3924	0.225844
110	2.26667	0.00285661	0.441176	0.466403	23	4	FALSE	ADAMTS4	32.9565	23	0	0	0.746667	FALSE	0	ADAMTS4	1808	0.22573
112	1.92444	0.0206715	0.51963	0.334875	47	3	FALSE	THBS1	32.7234	47	0	0	0.815111	FALSE	0	THBS1	11876	0.168568
117	2.06222	0.0052851	0.484914	0.378307	28	3	FALSE	MMP14	36	28	0	0	0.787556	FALSE	0	MMP14	3602	0.196721
119	2.25333	0.0020572	0.443787	0.415205	19	4	FALSE	CTSK	33.9474	19	0	0	0.749333	FALSE	0	CTSK	1438	0.227481
121	2.06222	0.000948	0.484914	0.619048	22	3	FALSE	MMP25	44.8182	22	0	0	0.787556	FALSE	0	MMP25	1248	0.237133
123	1.81778	0.0287851	0.550122	0.305464	61	3	FALSE	MMP2	32.5082	61	0	0	0.836444	FALSE	0	MMP2	20540	0.158577
126	2.46667	0.000945	0.405405	0.512821	13	4	FALSE	EFEMP2	28.9231	13	0	0	0.706667	FALSE	0	EFEMP2	438	0.257555
128	1.84889	0.0163586	0.540865	0.348701	56	3	FALSE	MMP9	35.8929	56	0	0	0.830222	FALSE	0	MMP9	14162	0.176812
130	1.96444	0.0193732	0.50905	0.346154	40	3	FALSE	LOX	33.075	40	0	0	0.807111	FALSE	0	LOX	11394	0.171373
132	2.32889	0.000758	0.429389	0.455882	17	4	FALSE	FBLN5	32.6471	17	0	0	0.734222	FALSE	0	FBLN5	666	0.2383
135	2.17333	0.00433748	0.460123	0.490196	34	3	FALSE	COL6A2	32.5882	34	0	0	0.765333	FALSE	0	COL6A2	3554	0.214396
137	2.39111	0.000276	0.418216	0.651515	12	4	FALSE	FBLN1	40.3333	12	0	0	0.721778	FALSE	0	FBLN1	282	0.312661
139	2.13333	0.000867	0.46875	0.679739	18	4	FALSE	MMP11	45.0556	18	0	0	0.773333	FALSE	0	MMP11	946	0.253121
141	1.78667	0.0539876	0.559701	0.274989	67	3	FALSE	COL1A1	30.5373	67	0	0	0.842667	FALSE	0	COL1A1	28592	0.148239
143	2.08444	0.00356933	0.479744	0.481884	24	4	FALSE	SOX9	39.1667	24	0	0	0.783111	FALSE	0	SOX9	2854	0.214026
145	1.65333	0.0669004	0.604839	0.235632	88	3	FALSE	FN1	31.0227	88	0	0	0.869333	FALSE	0	FN1	40310	0.144292
147	2.37778	0.00126985	0.420561	0.425	16	4	FALSE	FURIN	30.625	16	0	0	0.724444	FALSE	0	FURIN	764	0.24065
149	2.41333	0.000525	0.414365	0.639706	17	4	FALSE	COL14A1	34.1765	17	0	0	0.717333	FALSE	0	COL14A1	472	0.289631
151	2.02667	0.00420038	0.493421	0.462963	28	3	FALSE	MMP7	39.75	28	0	0	0.794667	FALSE	0	MMP7	3744	0.208115
153	2.25333	0.00672266	0.443787	0.333333	18	4	FALSE	LTBP3	31.1111	18	0	0	0.749333	FALSE	0	LTBP3	4718	0.207037
156	2.05778	0.00497358	0.485961	0.504762	36	3	FALSE	COL4A1	36.0833	36	0	0	0.788444	FALSE	0	COL4A1	4380	0.205019
158	2.37333	0.00156183	0.421348	0.484848	22	4	FALSE	COL12A1	29.6818	22	0	0	0.725333	FALSE	0	COL12A1	1104	0.243294
166	2.68889	3.55e-05	0.371901	0.8	6	4	FALSE	AEBP1	32.6667	6	0	0	0.662222	FALSE	0	AEBP1	18	0.408333
167	2.52	0.000174	0.396825	0.714286	7	4	FALSE	DPT	39.2857	7	0	0	0.696	FALSE	0	DPT	144	0.37062
174	2.15556	0.00103469	0.463918	0.542105	20	4	FALSE	ANGPT2	40.45	20	0	0	0.768889	FALSE	0	ANGPT2	1126	0.235174
175	1.86667	0.018718	0.535714	0.3433	43	3	FALSE	PDGFRA	35.6744	43	0	0	0.826667	FALSE	0	PDGFRA	12910	0.168276
177	1.91556	0.0229954	0.522042	0.256039	46	4	FALSE	FYN	28.7174	46	0	0	0.816889	FALSE	0	FYN	13348	0.143587
181	1.91556	0.0156799	0.522042	0.375375	37	3	FALSE	FGFR1	35.5405	37	0	0	0.816889	FALSE	0	FGFR1	9266	0.172396
183	1.8	0.0369048	0.555556	0.260666	59	4	FALSE	MYC	31.7797	59	0	0	0.84	FALSE	0	MYC	23240	0.150534
185	2.03556	0.0043196	0.491266	0.393548	31	4	FALSE	ERBB3	32.7419	31	0	0	0.792889	FALSE	0	ERBB3	3846	0.174159
188	2.06667	0.00384812	0.483871	0.333333	24	4	FALSE	EPHA2	34.3333	24	0	0	0.786667	FALSE	0	EPHA2	3168	0.183378
193	2.32889	0.00501972	0.429389	0.590909	12	4	FALSE	ANGPT4	37.75	12	0	0	0.734222	FALSE	0	ANGPT4	2478	0.267139
195	2.11556	0.00206604	0.472689	0.492877	27	3	FALSE	VEGFC	38.5926	27	0	0	0.776889	FALSE	0	VEGFC	1774	0.224376
197	2.20444	0.00472997	0.453629	0.324786	27	4	FALSE	STAT5A	27.7037	27	0	0	0.759111	FALSE	0	STAT5A	3444	0.177588
199	1.95556	0.0106435	0.511364	0.357697	43	3	FALSE	SERPINE1	34.5349	43	0	0	0.808889	FALSE	0	SERPINE1	7578	0.179869
201	2.26222	0.000224	0.442043	0.658333	16	4	FALSE	VEGFB	44.4375	16	0	0	0.747556	FALSE	0	VEGFB	290	0.290441
203	1.91556	0.0122925	0.522042	0.332226	43	4	FALSE	KIT	34.2326	43	0	0	0.816889	FALSE	0	KIT	10194	0.167807
205	1.8	0.0277158	0.555556	0.297643	55	3	FALSE	PDGFRB	34.0364	55	0	0	0.84	FALSE	0	PDGFRB	19224	0.158309
207	1.98222	0.00542011	0.504484	0.386207	30	4	FALSE	IGF1R	35.5333	30	0	0	0.803556	FALSE	0	IGF1R	4652	0.176783
212	3.08444	5.17e-05	0.324207	0	2	5	FALSE	PDK4	12	2	0	0	0.583111	FALSE	0	PDK4	14	0.5
217	2.05778	0.0157907	0.485961	0.298413	36	4	FALSE	PIK3CD	28.75	36	0	0	0.788444	FALSE	0	PIK3CD	10926	0.161517
222	2.45778	0.000931	0.406872	0.277778	9	4	FALSE	ANTXR1	28.6667	9	0	0	0.708444	FALSE	0	ANTXR1	508	0.246377
223	2.37333	0.00196822	0.421348	0.6	20	4	FALSE	FZD1	24.85	20	0	0	0.725333	FALSE	0	FZD1	1238	0.2
228	2.13333	0.00611583	0.46875	0.452763	34	4	FALSE	COL6A3	32.3235	34	0	0	0.773333	FALSE	0	COL6A3	3970	0.200585
230	2.10667	0.00338362	0.474684	0.516923	26	3	FALSE	LAMA4	36.2308	26	0	0	0.778667	FALSE	0	LAMA4	2526	0.207033
235	2.91111	0	0.343511	0	1	4	FALSE	ANXA2	52	1	0	0	0.617778	FALSE	0	ANXA2	0	0
237	2.19111	0.00213306	0.456389	0.314286	15	4	FALSE	ARRB1	32.7333	15	0	0	0.761778	FALSE	0	ARRB1	1702	0.193688
238	1.99111	0.0186646	0.502232	0.228228	37	4	FALSE	MAPK1	28.1622	37	0	0	0.801778	FALSE	0	MAPK1	10836	0.146678
240	2.09333	0.00888958	0.477707	0.272727	23	4	FALSE	RAF1	28.8696	23	0	0	0.781333	FALSE	0	RAF1	5274	0.158624
242	2.34667	0.000976	0.426136	0.392857	8	4	FALSE	PTH1R	39.75	8	0	0	0.730667	FALSE	0	PTH1R	648	0.27993
244	2.28	0.00457324	0.438596	0.362319	24	4	FALSE	GNG2	22.75	24	0	0	0.744	FALSE	0	GNG2	3460	0.160211
246	2.29778	0.0045779	0.435203	0.339921	23	4	FALSE	GNB1	22.1304	23	0	0	0.740444	FALSE	0	GNB1	3196	0.160365
248	2.29333	0.00501371	0.436047	0.359477	18	4	FALSE	CHRM1	25.7778	18	0	0	0.741333	FALSE	0	CHRM1	2764	0.179012
251	2.15556	0.0149456	0.463918	0.356855	32	4	FALSE	DVL1	25.9062	32	0	0	0.768889	FALSE	0	DVL1	8664	0.162736
255	1.93778	0.0304598	0.516055	0.216028	42	4	FALSE	TP53	28.0476	42	0	0	0.812444	FALSE	0	TP53	15294	0.140943
257	2.32444	0.00352333	0.43021	0.468421	20	4	FALSE	FZD4	24.3	20	0	0	0.735111	FALSE	0	FZD4	2208	0.177007
260	2.27556	0.00235368	0.439453	0.375	16	4	FALSE	PPP2R1B	29.125	16	0	0	0.744889	FALSE	0	PPP2R1B	1706	0.192881
262	2.42222	0.000737	0.412844	0.593407	14	4	FALSE	PPP2R2B	25.6429	14	0	0	0.715556	FALSE	0	PPP2R2B	650	0.211924
264	2.18222	0.00651016	0.458248	0.378788	33	4	FALSE	AXIN1	26.4242	33	0	0	0.763556	FALSE	0	AXIN1	4080	0.171586
265	1.96444	0.00702796	0.50905	0.42246	34	3	FALSE	TGFB3	37.1765	34	0	0	0.807111	FALSE	0	TGFB3	5860	0.186816
267	2.31556	0.00136546	0.431862	0.484848	12	4	FALSE	CDKN1A	36.5	12	0	0	0.736889	FALSE	0	CDKN1A	784	0.248299
269	2.41333	0.000929	0.414365	0.651515	12	4	FALSE	TCF7L2	35	12	0	0	0.717333	FALSE	0	TCF7L2	742	0.282258
273	2.52889	8.78e-05	0.395431	0.935897	13	4	FALSE	WNT6	27.8462	13	0	0	0.694222	FALSE	0	WNT6	132	0.273002
275	2.2	0.00290144	0.454545	0.614035	19	4	FALSE	SFRP1	36.0526	19	0	0	0.76	FALSE	0	SFRP1	2452	0.219833
277	2.20444	0.00208203	0.453629	0.631579	20	4	FALSE	WNT4	30.7	20	0	0	0.759111	FALSE	0	WNT4	1810	0.191875
279	2.20889	0.00295626	0.452716	0.525692	23	4	FALSE	FZD7	28.913	23	0	0	0.758222	FALSE	0	FZD7	2348	0.182994
281	2.46667	0.000302	0.405405	0.819048	15	4	FALSE	WNT7B	28.9333	15	0	0	0.706667	FALSE	0	WNT7B	348	0.258333
284	2.25778	0.0165074	0.442913	0.257143	21	4	FALSE	WWTR1	23.0476	21	0	0	0.748444	FALSE	0	WWTR1	7988	0.157208
286	1.85778	0.0121435	0.538278	0.406061	45	3	FALSE	SMAD2	37.5778	45	0	0	0.828444	FALSE	0	SMAD2	10660	0.177254
288	1.84444	0.0264726	0.542169	0.302857	50	3	FALSE	CCND1	34.02	50	0	0	0.831111	FALSE	0	CCND1	17356	0.162
291	2.56889	0.000254	0.389273	0.333333	7	4	FALSE	MAX	29.8571	7	0	0	0.686222	FALSE	0	MAX	194	0.31459
293	2.13333	0.00219929	0.46875	0.409357	19	4	FALSE	RUNX1	38.1053	19	0	0	0.773333	FALSE	0	RUNX1	1920	0.212879
295	2.04	0.0135425	0.490196	0.373333	25	4	FALSE	TGFBR2	37.4	25	0	0	0.792	FALSE	0	TGFBR2	7034	0.196421
297	2.29333	0.002756	0.436047	0.257143	15	4	FALSE	TSC2	27.3333	15	0	0	0.741333	FALSE	0	TSC2	1624	0.188046
299	1.84	0.0207991	0.543478	0.351837	50	3	FALSE	TGFB1	36.28	50	0	0	0.832	FALSE	0	TGFB1	15442	0.171943
301	2.47111	0.00255831	0.404676	0.409091	12	4	FALSE	FBXW11	22.8333	12	0	0	0.705778	FALSE	0	FBXW11	1008	0.198551
303	2.29333	0.00338289	0.436047	0.405263	20	4	FALSE	CSNK1D	26.6	20	0	0	0.741333	FALSE	0	CSNK1D	2334	0.189643
308	2.33333	0.00199202	0.428571	0.512821	13	4	FALSE	TCF7	34.1538	13	0	0	0.733333	FALSE	0	TCF7	1470	0.242226
310	1.92889	0.0111366	0.518433	0.418895	34	3	FALSE	SMAD3	36.6765	34	0	0	0.814222	FALSE	0	SMAD3	7860	0.177181
312	2.04	0.011276	0.490196	0.348485	33	4	FALSE	LEF1	30.0909	33	0	0	0.792	FALSE	0	LEF1	7098	0.163373
314	2.28	0.00375426	0.438596	0.424837	18	4	FALSE	ENSCHIP00000026821	25.3889	18	0	0	0.744	FALSE	0	ENSCHIP00000026821	2340	0.172336
316	2.10667	0.00628992	0.474684	0.455026	28	4	FALSE	AXIN2	28.4643	28	0	0	0.778667	FALSE	0	AXIN2	4406	0.162653
319	2.29333	0.00186142	0.436047	0.510823	22	4	FALSE	DVL3	27.8636	22	0	0	0.741333	FALSE	0	DVL3	1640	0.199026
334	2.40889	0.00119351	0.415129	0.660131	18	4	FALSE	FZD6	26.1667	18	0	0	0.718222	FALSE	0	FZD6	1192	0.216253
339	2.60889	0.000799	0.383305	0.666667	16	4	FALSE	FZD3	22.1875	16	0	0	0.678222	FALSE	0	FZD3	798	0.267319
343	2.03556	0.0100451	0.491266	0.409195	30	3	FALSE	BMP4	36.3667	30	0	0	0.792889	FALSE	0	BMP4	5968	0.194474
352	2.04889	0.00434644	0.488069	0.32971	24	4	FALSE	AXL	37.1667	24	0	0	0.790222	FALSE	0	AXL	3188	0.194372
358	2.06222	0.0155023	0.484914	0.231746	36	4	FALSE	SOCS3	25.0278	36	0	0	0.787556	FALSE	0	SOCS3	8306	0.141243
360	2.49778	2.28e-05	0.400356	0.333333	4	4	FALSE	TMEM119	44.75	4	0	0	0.700444	FALSE	0	TMEM119	20	0.397321
362	1.97778	0.0193706	0.505618	0.272425	43	4	FALSE	SHC1	29.4419	43	0	0	0.804444	FALSE	0	SHC1	12246	0.155777
368	2.32	0.000814	0.431034	0.25641	13	4	FALSE	GAS6	29.3077	13	0	0	0.736	FALSE	0	GAS6	664	0.203526
371	2.26667	0.00184778	0.441176	0.269231	13	4	FALSE	MITF	29.6923	13	0	0	0.746667	FALSE	0	MITF	1120	0.193826
373	2.07556	0.00347588	0.481799	0.458874	22	4	FALSE	TGM2	43.8182	22	0	0	0.784889	FALSE	0	TGM2	2782	0.234322
375	2.46667	0.000111	0.405405	0.428571	7	4	FALSE	LRP1	35.2857	7	0	0	0.706667	FALSE	0	LRP1	132	0.301587
378	2.24889	0.00367957	0.444664	0.310526	20	4	FALSE	CTSS	29.05	20	0	0	0.750222	FALSE	0	CTSS	2176	0.189869
380	2.01778	0.00254262	0.495595	0.524631	29	3	FALSE	SNAI2	40.6897	29	0	0	0.796444	FALSE	0	SNAI2	2380	0.211925
383	2.36444	8.52e-05	0.422932	0.769231	13	4	FALSE	SHC2	37.9231	13	0	0	0.727111	FALSE	0	SHC2	108	0.285136
387	2.65333	0.000524	0.376884	0.466667	6	5	FALSE	BAD	22.5	6	0	0	0.669333	FALSE	0	BAD	260	0.277778
390	2.78222	0.000219	0.359425	0.619048	7	5	FALSE	YWHAQ	17.5714	7	0	0	0.643556	FALSE	0	YWHAQ	100	0.297821
393	2.11111	0.00781502	0.473684	0.310526	20	4	FALSE	YWHAZ	32.05	20	0	0	0.777778	FALSE	0	YWHAZ	4918	0.176099
395	2.65778	0.000709	0.376254	0.266667	6	4	FALSE	BAX	19.5	6	0	0	0.668444	FALSE	0	BAX	376	0.238683
397	2.92444	0	0.341945	1	2	5	FALSE	BBC3	24	2	0	0	0.615111	FALSE	0	BBC3	0	0.55814
400	2.31111	0.00199876	0.432692	0.393939	12	4	FALSE	PTX3	37.5	12	0	0	0.737778	FALSE	0	PTX3	1100	0.258046
402	2.44444	0.00034	0.409091	0.6	5	4	FALSE	CAPN1	45.2	5	0	0	0.711111	FALSE	0	CAPN1	234	0.36748
406	2.53778	0.000633	0.394046	0.392857	8	4	FALSE	BCL3	24.125	8	0	0	0.692444	FALSE	0	BCL3	296	0.235294
411	2.40889	0.00180737	0.415129	0.43956	14	4	FALSE	RELB	24	14	0	0	0.718222	FALSE	0	RELB	934	0.190476
413	2.49778	0.00058	0.400356	0.2	5	4	FALSE	CRISPLD2	32.4	5	0	0	0.700444	FALSE	0	CRISPLD2	302	0.288288
415	2.36444	0.00219661	0.422932	0.433333	16	4	FALSE	TNFAIP3	24.5625	16	0	0	0.727111	FALSE	0	TNFAIP3	1084	0.18608
417	2.38222	0.00172474	0.419776	0.428571	14	4	FALSE	NFKB2	28	14	0	0	0.723556	FALSE	0	NFKB2	980	0.217054
419	2.28444	0.00034	0.437743	0.5	8	4	FALSE	BIRC5	47.125	8	0	0	0.743111	FALSE	0	BIRC5	340	0.300159
424	1.92889	0.0177903	0.518433	0.280781	37	4	FALSE	FOS	33.6486	37	0	0	0.814222	FALSE	0	FOS	10780	0.16414
429	2.44444	0.00108181	0.409091	0.654545	11	4	FALSE	BMPR1A	31.3636	11	0	0	0.711111	FALSE	0	BMPR1A	534	0.26356
436	2.76889	2.29e-05	0.361156	0.666667	3	4	FALSE	GREM1	28	3	0	0	0.646222	FALSE	0	GREM1	28	0.474576
439	2.56444	0.00101907	0.389948	0.133333	6	4	FALSE	ID1	27	6	0	0	0.687111	FALSE	0	ID1	454	0.270408
441	2.29778	0.000553	0.435203	0.6	15	4	FALSE	SMAD1	34.6	15	0	0	0.740444	FALSE	0	SMAD1	498	0.236986
444	2.56	6.58e-05	0.390625	0.7	5	4	FALSE	DCHS1	37	5	0	0	0.688	FALSE	0	DCHS1	48	0.37
448	1.92	0.00767001	0.520833	0.419662	44	3	FALSE	SPP1	37.9091	44	0	0	0.816	FALSE	0	SPP1	6446	0.190498
450	1.93333	0.00570223	0.517241	0.414414	37	3	FALSE	FGF7	38.6486	37	0	0	0.813333	FALSE	0	FGF7	4490	0.190387
454	2.65778	0.000164	0.376254	0.5	4	4	FALSE	FOXF1	29.5	4	0	0	0.668444	FALSE	0	FOXF1	108	0.365625
466	2.14667	0.00103375	0.465839	0.627451	18	3	FALSE	TGFB2	41.9444	18	0	0	0.770667	FALSE	0	TGFB2	1140	0.24106
479	1.76	0.0451005	0.568182	0.278546	63	3	FALSE	PTK2	33.1111	63	0	0	0.848	FALSE	0	PTK2	28370	0.153292
482	2.11111	0.00579806	0.473684	0.431452	32	4	FALSE	CCL5	34.0625	32	0	0	0.777778	FALSE	0	CCL5	4914	0.201553
483	2.21778	0.00475691	0.450902	0.411494	30	4	FALSE	IL2RG	26.9333	30	0	0	0.756444	FALSE	0	IL2RG	3648	0.178366
486	2.17778	0.00506302	0.459184	0.425806	31	4	FALSE	JAK3	29.1935	31	0	0	0.764444	FALSE	0	JAK3	4400	0.184769
488	2.16444	0.00481889	0.462012	0.383598	28	4	FALSE	IL2RA	27.1786	28	0	0	0.767111	FALSE	0	IL2RA	3626	0.167769
494	2.31111	0.00193793	0.432692	0.442857	21	4	FALSE	IL10RA	27.7619	21	0	0	0.737778	FALSE	0	IL10RA	1532	0.199726
496	2.47556	0.000423	0.40395	0.576923	13	4	FALSE	IL1R1	27.7692	13	0	0	0.704889	FALSE	0	IL1R1	418	0.250173
498	2.32889	0.00228837	0.429389	0.513834	23	4	FALSE	IL7	29.3478	23	0	0	0.734222	FALSE	0	IL7	1778	0.224029
508	2.64	0.000284	0.378788	0.659341	14	4	FALSE	IFNAR2	23.0714	14	0	0	0.672	FALSE	0	IFNAR2	200	0.292043
512	2.16	0.0066341	0.462963	0.349754	29	4	FALSE	IL7R	27.1379	29	0	0	0.768	FALSE	0	IL7R	4416	0.167305
514	1.84444	0.0220221	0.542169	0.309388	50	3	FALSE	PTPRC	34.62	50	0	0	0.831111	FALSE	0	PTPRC	16072	0.164857
517	2.10667	0.00526237	0.474684	0.390313	27	4	FALSE	STAT6	34.2222	27	0	0	0.778667	FALSE	0	STAT6	4284	0.193346
519	2.46222	0.00134898	0.406137	0.448529	17	4	FALSE	TNFRSF1B	24	17	0	0	0.707556	FALSE	0	TNFRSF1B	856	0.216216
523	2.11556	0.00293132	0.472689	0.458689	27	4	FALSE	CD19	37.0741	27	0	0	0.776889	FALSE	0	CD19	3334	0.211852
526	2.01333	0.00981996	0.496689	0.331437	38	4	FALSE	CSF1	33.0263	38	0	0	0.797333	FALSE	0	CSF1	6812	0.178521
559	2.51556	9.54e-05	0.397527	0.678571	8	4	FALSE	NMI	36	8	0	0	0.696889	FALSE	0	NMI	98	0.336449
565	2.70222	0	0.370066	1	3	4	FALSE	GADD45A	34.6667	3	0	0	0.659556	FALSE	0	GADD45A	0	0.468468
567	2.16889	0.00451641	0.461066	0.330882	17	4	FALSE	MAPK12	33.9412	17	0	0	0.766222	FALSE	0	MAPK12	2824	0.197332
584	2.29778	0.000849	0.435203	0.531579	20	4	FALSE	FLT3LG	34.65	20	0	0	0.740444	FALSE	0	FLT3LG	704	0.242308
590	2.37778	0.00659043	0.420561	0.366013	18	4	FALSE	INPP5D	24.2778	18	0	0	0.724444	FALSE	0	INPP5D	3800	0.19224
593	2.45333	0.000926	0.407609	0.610294	17	4	FALSE	IL3RA	27.8235	17	0	0	0.709333	FALSE	0	IL3RA	686	0.248424
596	2.4	0.00023	0.416667	0.672727	11	4	FALSE	PIK3AP1	36.1818	11	0	0	0.72	FALSE	0	PIK3AP1	192	0.28267
608	2.21333	0.00179139	0.451807	0.55336	23	4	FALSE	LAMA5	33.3913	23	0	0	0.757333	FALSE	0	LAMA5	1538	0.214047
610	2.42667	0.00436447	0.412088	0.338095	21	4	FALSE	GNB3	19.381	21	0	0	0.714667	FALSE	0	GNB3	2616	0.169591
613	2.59111	0	0.385935	1	2	4	FALSE	MAGI1	55.5	2	0	0	0.681778	FALSE	0	MAGI1	0	0.572165
615	2.25778	0.00160745	0.442913	0.536797	22	3	FALSE	LAMA3	32	22	0	0	0.748444	FALSE	0	LAMA3	1294	0.22069
617	2.35556	0.0109382	0.424528	0.164835	14	4	FALSE	PPP1CB	21.4286	14	0	0	0.728889	FALSE	0	PPP1CB	5506	0.162637
621	2.51556	0.000676	0.397527	0.333333	4	4	FALSE	NF2	39.75	4	0	0	0.696889	FALSE	0	NF2	254	0.359091
623	2.16444	0.00476252	0.462012	0.441558	22	4	FALSE	RAC3	31.0909	22	0	0	0.767111	FALSE	0	RAC3	3930	0.185065
625	2.19111	0.00290838	0.456389	0.398551	24	4	FALSE	LAMC2	31.2083	24	0	0	0.761778	FALSE	0	LAMC2	2024	0.196279
627	1.97333	0.0119437	0.506757	0.283422	34	4	FALSE	HBEGF	33.2647	34	0	0	0.805333	FALSE	0	HBEGF	8008	0.168707
637	2.88444	0	0.346687	1	3	5	FALSE	SH3PXD2B	27.6667	3	0	0	0.623111	FALSE	0	SH3PXD2B	0	0.576389
639	2.00889	0.016177	0.497788	0.29916	35	4	FALSE	RAC2	30.6571	35	0	0	0.798222	FALSE	0	RAC2	10832	0.160509
642	2.36444	0.00562155	0.422932	0.287879	12	4	FALSE	DUSP1	25.9167	12	0	0	0.727111	FALSE	0	DUSP1	2506	0.193609
646	2.27111	0.000152	0.440313	0.666667	7	4	FALSE	FSCN1	48.7143	7	0	0	0.745778	FALSE	0	FSCN1	158	0.304464
653	2.84	0	0.352113	1	8	5	FALSE	LPAR5	18.625	8	0	0	0.632	FALSE	0	LPAR5	0	0.358173
657	2.16	0.0125493	0.462963	0.3	25	4	FALSE	PIK3CG	27.08	25	0	0	0.768	FALSE	0	PIK3CG	7762	0.163879
668	2.51556	0.000453	0.397527	0.8	10	4	FALSE	LPAR3	24.7	10	0	0	0.696889	FALSE	0	LPAR3	416	0.239806
670	2.32444	0.00158613	0.43021	0.621212	12	4	FALSE	LPAR1	29.9167	12	0	0	0.735111	FALSE	0	LPAR1	1190	0.209207
673	2.38222	0.00283082	0.419776	0.466667	16	4	FALSE	PIK3R5	23.0625	16	0	0	0.723556	FALSE	0	PIK3R5	1740	0.181102
682	2.27556	0.00258515	0.439453	0.757143	21	4	FALSE	THBS3	35	21	0	0	0.744889	FALSE	0	THBS3	1392	0.244755
690	2.36889	0.0030566	0.422139	0.56044	14	4	FALSE	NID2	36	14	0	0	0.726222	FALSE	0	NID2	2730	0.274264
692	2.48889	0.000417	0.401786	0.688889	10	4	FALSE	CRTAP	32.7	10	0	0	0.702222	FALSE	0	CRTAP	328	0.291964
696	2.67556	1.72e-05	0.373754	0.892857	8	4	FALSE	COL27A1	31.125	8	0	0	0.664889	FALSE	0	COL27A1	12	0.384259
712	2.49333	0.000189	0.40107	0.618182	11	4	FALSE	MFAP4	32.1818	11	0	0	0.701333	FALSE	0	MFAP4	138	0.289926
728	2.16889	0.000217	0.461066	0.78022	14	4	FALSE	MMP16	48.9286	14	0	0	0.766222	FALSE	0	MMP16	302	0.281199
761	2.71556	0.00900153	0.368249	0.1	5	4	FALSE	SULF1	21.4	5	0	0	0.656889	FALSE	0	SULF1	3464	0.284932
763	2.24889	0.00105725	0.444664	0.8	20	4	FALSE	THBS4	38.7	20	0	0	0.750222	FALSE	0	THBS4	668	0.258
772	2.58222	0.00894904	0.387263	0.52381	7	4	FALSE	FKBP10	34.8571	7	0	0	0.683556	FALSE	0	FKBP10	4772	0.361607
855	2.37778	0.000548	0.420561	0.190476	7	4	FALSE	CREB5	31	7	0	0	0.724444	FALSE	0	CREB5	394	0.231602
870	2.12889	0.00857548	0.469729	0.24	25	4	FALSE	PRKCB	26.8	25	0	0	0.774222	FALSE	0	PRKCB	5124	0.154682
882	2.34222	0.0020597	0.426945	0.516667	16	4	FALSE	OSMR	28.6875	16	0	0	0.731556	FALSE	0	OSMR	1414	0.210938
917	2.42222	0.00102188	0.412844	0.529412	18	4	FALSE	CSF3R	26.3333	18	0	0	0.715556	FALSE	0	CSF3R	886	0.221289
923	2.62222	0.000356	0.381356	0.641026	13	4	FALSE	PRLR	22.3077	13	0	0	0.675556	FALSE	0	PRLR	286	0.272045
957	2.18667	0.000233	0.457317	0.794872	13	4	FALSE	EFNA1	45.9231	13	0	0	0.762667	FALSE	0	EFNA1	344	0.266995
963	2.23556	0.00121751	0.447316	0.4	11	4	FALSE	DLG4	38.0909	11	0	0	0.752889	FALSE	0	DLG4	734	0.232262
965	2.56	0.000136	0.390625	0.4	5	4	FALSE	DLG1	29	5	0	0	0.688	FALSE	0	DLG1	68	0.287129
1000	2.46667	0.000688	0.405405	0.238095	7	4	FALSE	PRKAA1	32	7	0	0	0.706667	FALSE	0	PRKAA1	628	0.269976
1016	2.32889	0.000137	0.429389	0.6	5	4	FALSE	FLOT1	50.2	5	0	0	0.734222	FALSE	0	FLOT1	148	0.336913
1053	2.53333	0.000353	0.394737	0.527778	9	4	FALSE	MMP19	32.7778	9	0	0	0.693333	FALSE	0	MMP19	208	0.312169
1073	2.07556	0.00557869	0.481799	0.307692	26	4	FALSE	PTK2B	33.9615	26	0	0	0.784889	FALSE	0	PTK2B	4144	0.183576
1084	2.63556	0.00154159	0.379427	0.266667	6	4	FALSE	PTPN7	19.8333	6	0	0	0.672889	FALSE	0	PTPN7	658	0.246835
1092	3.15111	0	0.317348	0	1	5	FALSE	SYT7	32	1	0	0	0.569778	FALSE	0	SYT7	0	0
1143	2.53333	2.8e-05	0.394737	0.777778	9	4	FALSE	EFNA4	35.7778	9	0	0	0.693333	FALSE	0	EFNA4	38	0.354235
1160	3.03556	0	0.329429	0	1	5	FALSE	ELF3	25	1	0	0	0.592889	FALSE	0	ELF3	0	0
1230	2.71556	0.000901	0.368249	0.333333	6	4	FALSE	FRMD6	15.3333	6	0	0	0.656889	FALSE	0	FRMD6	296	0.223039
1249	2.30222	0.0023523	0.434363	0.555556	10	4	FALSE	PDPN	44.8	10	0	0	0.739556	FALSE	0	PDPN	1210	0.3
1270	2.88444	4.37e-05	0.346687	0	2	4	FALSE	ID2	21.5	2	0	0	0.623111	FALSE	0	ID2	30	0.525641
1276	2.43111	0.000741	0.411335	0.305556	9	4	FALSE	RPS6KA3	29.2222	9	0	0	0.713778	FALSE	0	RPS6KA3	460	0.238616
1292	3.57778	0	0.279503	0	1	5	FALSE	P3H4	7	1	0	0	0.484444	FALSE	0	P3H4	0	0
1307	2.42222	0.00081	0.412844	0.474359	13	4	FALSE	SOCS2	27.9231	13	0	0	0.715556	FALSE	0	SOCS2	710	0.227017
1369	2.45778	4.04e-05	0.406872	0.821429	8	4	FALSE	SERPINF2	40.75	8	0	0	0.708444	FALSE	0	SERPINF2	44	0.339583
1391	2.67111	0.000706	0.374376	0.357143	8	5	FALSE	TEAD1	17	8	0	0	0.665778	FALSE	0	TEAD1	322	0.222039
1413	2.69333	0.00132608	0.371287	0.428571	7	5	FALSE	TEAD2	16.8571	7	0	0	0.661333	FALSE	0	TEAD2	432	0.225869
1434	2.53778	0.000335	0.394046	0.571429	7	4	FALSE	TRAF2	27.5714	7	0	0	0.692444	FALSE	0	TRAF2	238	0.267684
1438	2.36	0.00114089	0.423729	0.288889	10	4	FALSE	S1PR1	32.6	10	0	0	0.728	FALSE	0	S1PR1	886	0.234532
1447	2.72444	1.29e-05	0.367047	0.833333	4	5	FALSE	SPHK2	29.5	4	0	0	0.655111	FALSE	0	SPHK2	6	0.388158
1602	3.04889	0.000144	0.327988	0	3	5	FALSE	MAP4K1	11.6667	3	0	0	0.590222	FALSE	0	MAP4K1	46	0.380952
1690	2.65778	0.000283	0.376254	0.644444	10	5	FALSE	SOCS5	25.4	10	0	0	0.668444	FALSE	0	SOCS5	226	0.295349
1755	2.94222	0	0.339879	1	3	5	FALSE	INPP5F	26.3333	3	0	0	0.611556	FALSE	0	INPP5F	0	0.526667
1759	2.92444	0	0.341945	1	2	5	FALSE	UBASH3B	30.5	2	0	0	0.615111	FALSE	0	UBASH3B	0	0.598039
1785	2.51111	0.0001	0.39823	0.777778	9	4	FALSE	TNXB	37.6667	9	0	0	0.697778	FALSE	0	TNXB	102	0.364617
2216	3.25333	0	0.307377	0	1	5	FALSE	MOB1B	21	1	0	0	0.549333	FALSE	0	MOB1B	0	0
2233	2.58667	0.000168	0.386598	0	4	5	FALSE	PATJ	30	4	0	0	0.682667	FALSE	0	PATJ	124	0.318681
2342	3.35111	0	0.298408	0	1	5	FALSE	PPM1B	14	1	0	0	0.529778	FALSE	0	PPM1B	0	0
2552	3.71111	0	0.269461	0	1	5	FALSE	SULF2	5	1	0	0	0.457778	FALSE	0	SULF2	0	0

## Sheet: GO
ONTOLOGY	ID	Description	GeneRatio	BgRatio	pvalue	p.adjust	qvalue	geneID	Count
BP	GO:0030198	extracellular matrix organization	62/233	307/18800	6.35527e-58	1.63882e-54	8.01744e-55	MMP14/TGFB1/CTSK/MMP2/ADAM8/LTBP3/RUNX1/GREM1/ELF3/P3H4/TNXB/PDGFRA/COL4A1/ITGB1/COL1A1/TGFB2/TNF/BCL3/SMAD3/MMP9/CTSS/LOX/SULF1/MMP16/MMP7/DPT/PDPN/CRISPLD2/SERPINF2/FKBP10/ANTXR1/MPV17/FOXF1/CRTAP/ADAMTS4/FLOT1/MMP25/FSCN1/NFKB2/EFEMP2/GAS6/AEBP1/LRP1/MMP19/PTX3/FBLN1/COL27A1/COL12A1/PAPLN/NID2/SULF2/COL14A1/TNFRSF1B/MMP11/ADAMTS18/SOX9/MMP28/MFAP4/SH3PXD2B/ADAMTS7/FBLN5/FURIN	62
BP	GO:0043062	extracellular structure organization	62/233	308/18800	7.88465e-58	1.63882e-54	8.01744e-55	MMP14/TGFB1/CTSK/MMP2/ADAM8/LTBP3/RUNX1/GREM1/ELF3/P3H4/TNXB/PDGFRA/COL4A1/ITGB1/COL1A1/TGFB2/TNF/BCL3/SMAD3/MMP9/CTSS/LOX/SULF1/MMP16/MMP7/DPT/PDPN/CRISPLD2/SERPINF2/FKBP10/ANTXR1/MPV17/FOXF1/CRTAP/ADAMTS4/FLOT1/MMP25/FSCN1/NFKB2/EFEMP2/GAS6/AEBP1/LRP1/MMP19/PTX3/FBLN1/COL27A1/COL12A1/PAPLN/NID2/SULF2/COL14A1/TNFRSF1B/MMP11/ADAMTS18/SOX9/MMP28/MFAP4/SH3PXD2B/ADAMTS7/FBLN5/FURIN	62
BP	GO:0045229	external encapsulating structure organization	62/233	310/18800	1.21065e-57	1.67756e-54	8.20695e-55	MMP14/TGFB1/CTSK/MMP2/ADAM8/LTBP3/RUNX1/GREM1/ELF3/P3H4/TNXB/PDGFRA/COL4A1/ITGB1/COL1A1/TGFB2/TNF/BCL3/SMAD3/MMP9/CTSS/LOX/SULF1/MMP16/MMP7/DPT/PDPN/CRISPLD2/SERPINF2/FKBP10/ANTXR1/MPV17/FOXF1/CRTAP/ADAMTS4/FLOT1/MMP25/FSCN1/NFKB2/EFEMP2/GAS6/AEBP1/LRP1/MMP19/PTX3/FBLN1/COL27A1/COL12A1/PAPLN/NID2/SULF2/COL14A1/TNFRSF1B/MMP11/ADAMTS18/SOX9/MMP28/MFAP4/SH3PXD2B/ADAMTS7/FBLN5/FURIN	62
BP	GO:0048771	tissue remodeling	36/233	174/18800	8.14585e-34	8.46557e-31	4.14152e-31	MMP14/TGFB1/TIMP1/CTSK/S1PR1/PDK4/PTN/PTK2B/TNFAIP3/TGFB3/TPP1/MMP2/TP53/MITF/GPR137B/INPP5D/ADAM8/SFRP1/CAPN1/LTBP3/SYT7/RUNX1/GREM1/EPHA2/IL7/UBASH3B/ELF3/TMEM119/NOL3/AXL/BAX/P3H4/PTH1R/SPP1/THBS4/CTNNB1	36
BP	GO:0031589	cell-substrate adhesion	42/233	364/18800	1.46604e-28	1.21887e-25	5.96293e-26	CDC42/PTK2/RAC3/MMP14/RAC2/PTK2B/SFRP1/GREM1/AXL/THBS3/TNXB/THBS1/ITGB1/ITGB4/ITGA6/COL1A1/FN1/ITGA2/CSF1/ITGA4/ANGPT2/EFNA1/ITGA5/ITGB7/LAMA5/WNT4/NF2/ITGB2/SERPINE1/SMAD3/FZD4/FZD7/ID1/CTNNB1/PDPN/ANTXR1/FOXF1/EFEMP2/GAS6/FBLN1/NID2/FBLN5	42
BP	GO:0046849	bone remodeling	25/233	88/18800	1.75424e-27	1.21539e-24	5.94594e-25	TGFB1/CTSK/S1PR1/PDK4/PTN/PTK2B/TNFAIP3/TGFB3/TPP1/MITF/GPR137B/INPP5D/ADAM8/SFRP1/LTBP3/SYT7/GREM1/EPHA2/IL7/UBASH3B/TMEM119/P3H4/PTH1R/SPP1/CTNNB1	25
BP	GO:0001503	ossification	42/233	420/18800	4.75121e-26	2.82154e-23	1.38035e-23	MAPK1/PTK2/MMP14/TGFB1/CTSK/S1PR1/PTN/PTK2B/TGFB3/MMP2/SFRP1/LTBP3/RUNX1/GREM1/EPHA2/TMEM119/PTH1R/THBS3/SPP1/COL6A1/COL1A1/CSF1/VEGFC/TGFB2/TNF/WWTR1/WNT4/LEF1/SNAI2/SMAD3/FZD1/WNT7B/SMAD1/AXIN2/BMPR1A/BMP4/CTNNB1/MMP9/LOX/MMP16/SOX9/ADAMTS7	42
BP	GO:0032963	collagen metabolic process	25/233	101/18800	8.15287e-26	4.23643e-23	2.07254e-23	MMP14/TGFB1/CTSK/TGFB3/MMP2/RUNX1/P3H4/TNXB/ITGB1/COL1A1/ITGA2/PDGFRB/WNT4/BMP4/MMP9/CTSS/MMP16/MMP7/SERPINF2/MMP25/MMP19/MMP11/MMP28/MFAP4/FURIN	25
BP	GO:0001704	formation of primary germ layer	26/233	123/18800	7.02613e-25	3.24529e-22	1.58766e-22	MMP14/MMP2/EPHA2/LAMA3/COL6A1/ITGB1/ITGB4/FN1/ITGA2/ITGA4/ITGA5/DUSP1/AXIN1/NF2/ITGB2/LEF1/SMAD3/FZD7/SMAD1/BMPR1A/BMP4/SMAD2/CTNNB1/MMP9/FOXF1/COL12A1	26
BP	GO:0007369	gastrulation	30/233	190/18800	1.29999e-24	5.40407e-22	2.64378e-22	MMP14/MMP2/TP53/SFRP1/EPHA2/LAMA3/COL6A1/ITGB1/ITGB4/FN1/ITGA2/ITGA4/ITGA5/DUSP1/AXIN1/NF2/ITGB2/LEF1/SMAD3/FZD7/SMAD1/TGFBR2/BMPR1A/BMP4/SMAD2/DVL1/CTNNB1/MMP9/FOXF1/COL12A1	30
BP	GO:0033674	positive regulation of kinase activity	42/233	476/18800	6.66528e-24	2.51887e-21	1.23228e-21	CDC42/PTK2/TGFB1/PTK2B/ADAM8/GREM1/EPHA2/AXL/PRLR/FGFR1/PIK3CG/PDGFRA/THBS1/ANGPT4/ERBB3/CSF1/CD19/CDKN1A/VEGFC/BAD/EFNA1/KIT/PDGFRB/PIK3R5/IGF1R/TRAF2/TGFB2/PTPRC/CCL5/TNF/AXIN1/FZD4/DVL3/AXIN2/DLG4/TGFBR2/BMPR1A/CCND1/DLG1/MOB1B/GAS6/HBEGF	42
BP	GO:0048732	gland development	40/233	431/18800	1.34912e-23	4.67357e-21	2.2864e-21	MAPK1/CDC42/RAF1/TGFB1/PTN/TNFAIP3/TGFB3/TGM2/MMP2/SFRP1/CAPN1/EPHA2/ELF3/BAX/PRLR/SOCS2/PDGFRA/FGF7/ITGA2/CSF1/LAMA5/MYC/TGFB2/STAT6/TNF/WNT4/LEF1/SNAI2/SMAD3/WNT7B/TGFBR2/BMPR1A/BMP4/ID2/SMAD2/CCND1/CTNNB1/SULF1/FOXF1/SOX9	40
BP	GO:0022612	gland morphogenesis	24/233	123/18800	3.71126e-22	1.18675e-19	5.80579e-20	CDC42/TGFB1/PTN/TNFAIP3/TGFB3/TGM2/MMP2/SFRP1/CAPN1/EPHA2/ELF3/BAX/FGF7/CSF1/LAMA5/TGFB2/STAT6/TNF/WNT4/SNAI2/TGFBR2/BMP4/SULF1/SOX9	24
BP	GO:0018108	peptidyl-tyrosine phosphorylation	36/233	373/18800	7.41028e-22	2.20032e-19	1.07644e-19	PTK2/TGFB1/PTK2B/TP53/SFRP1/GREM1/EPHA2/IL7/AXL/PRLR/SHC1/SOCS5/FGFR1/PDGFRA/THBS4/ANGPT4/ERBB3/FGF7/EFNA1/ITGA5/KIT/PDGFRB/JAK3/IGF1R/HCLS1/PTPRC/CCL5/TNF/INPP5F/FYN/SOCS3/NF2/ITGB2/DLG4/GAS6/HBEGF	36
BP	GO:0018212	peptidyl-tyrosine modification	36/233	376/18800	9.72192e-22	2.65043e-19	1.29664e-19	PTK2/TGFB1/PTK2B/TP53/SFRP1/GREM1/EPHA2/IL7/AXL/PRLR/SHC1/SOCS5/FGFR1/PDGFRA/THBS4/ANGPT4/ERBB3/FGF7/EFNA1/ITGA5/KIT/PDGFRB/JAK3/IGF1R/HCLS1/PTPRC/CCL5/TNF/INPP5F/FYN/SOCS3/NF2/ITGB2/DLG4/GAS6/HBEGF	36
BP	GO:0042060	wound healing	38/233	429/18800	1.02013e-21	2.65043e-19	1.29664e-19	PTK2/RAF1/TGFB1/TIMP1/TNFAIP3/TGFB3/SYT7/UBASH3B/AXL/PIK3CG/PDGFRA/THBS1/ITGB1/COL1A1/FN1/ERBB3/ITGA2/CDKN1A/ITGA5/PDGFRB/TGFB2/TNF/WNT4/SERPINE1/SMAD3/FZD7/TGFBR2/ACTB/SMAD2/FZD6/LOX/PDPN/SERPINF2/FKBP10/GAS6/FBLN1/ADAMTS18/HBEGF	38
BP	GO:0016055	Wnt signaling pathway	38/233	452/18800	6.38891e-21	1.56228e-18	7.64296e-19	CDC42/RAC3/TGFB1/TNFAIP3/MITF/SFRP1/GREM1/TSC2/COL1A1/PRKAA1/PPM1B/AXIN1/WWTR1/WNT4/CSNK1D/LEF1/SNAI2/SMAD3/FZD4/DVL3/FZD1/WNT7B/TCF7/FZD7/AXIN2/FZD2/FBXW11/CCND1/FZD3/WNT6/DVL1/TCF7L2/FZD6/CTNNB1/SULF1/LRP1/SULF2/SOX9	38
BP	GO:0198738	cell-cell signaling by wnt	38/233	454/18800	7.45474e-21	1.72163e-18	8.42255e-19	CDC42/RAC3/TGFB1/TNFAIP3/MITF/SFRP1/GREM1/TSC2/COL1A1/PRKAA1/PPM1B/AXIN1/WWTR1/WNT4/CSNK1D/LEF1/SNAI2/SMAD3/FZD4/DVL3/FZD1/WNT7B/TCF7/FZD7/AXIN2/FZD2/FBXW11/CCND1/FZD3/WNT6/DVL1/TCF7L2/FZD6/CTNNB1/SULF1/LRP1/SULF2/SOX9	38
BP	GO:0050900	leukocyte migration	35/233	384/18800	1.88784e-20	4.13039e-18	2.02067e-18	MAPK1/CDC42/PTK2/MMP14/S1PR1/PTN/RAC2/PTK2B/ADAM8/GREM1/CSF3R/PIK3CG/THBS4/THBS1/ITGB1/ITGA6/ITGA2/CSF1/ITGA4/VEGFC/VEGFB/ITGB7/KIT/PIK3CD/IL1R1/TGFB2/DUSP1/CCL5/TNF/FYN/ITGB2/SERPINE1/MMP9/GAS6/MMP28	35
BP	GO:0060326	cell chemotaxis	32/233	315/18800	3.56313e-20	7.40597e-18	3.62314e-18	MAPK1/PTK2/S1PR1/PTN/RAC2/PTK2B/ADAM8/GREM1/EPHA2/CSF3R/FGFR1/PIK3CG/PDGFRA/LPAR1/THBS4/THBS1/CSF1/VEGFC/VEGFB/KIT/PDGFRB/PIK3CD/TGFB2/DUSP1/CCL5/ITGB2/LEF1/SERPINE1/LOX/GAS6/MMP28/HBEGF	32
BP	GO:0045860	positive regulation of protein kinase activity	35/233	396/18800	5.13822e-20	1.01712e-17	4.97596e-18	PTK2/TGFB1/PTK2B/ADAM8/GREM1/PRLR/FGFR1/PIK3CG/THBS1/ANGPT4/ERBB3/CSF1/CDKN1A/VEGFC/EFNA1/KIT/PDGFRB/PIK3R5/TRAF2/TGFB2/PTPRC/CCL5/TNF/AXIN1/FZD4/DVL3/AXIN2/DLG4/TGFBR2/BMPR1A/CCND1/DLG1/MOB1B/GAS6/HBEGF	35
BP	GO:0060485	mesenchyme development	31/233	301/18800	9.60753e-20	1.81539e-17	8.88122e-18	MAPK1/CDC42/TGFB1/TGFB3/SFRP1/GREM1/FGFR1/COL1A1/FN1/ERBB3/EFNA1/PDGFRB/LAMA5/MYC/TGFB2/WWTR1/WNT4/LEF1/SNAI2/SMAD3/TEAD2/AXIN2/TGFBR2/BMPR1A/BMP4/SMAD2/TCF7L2/CTNNB1/PDPN/FOXF1/SOX9	31
BP	GO:0050673	epithelial cell proliferation	36/233	443/18800	2.31598e-19	4.18588e-17	2.04781e-17	MAPK1/CDC42/MMP14/TGFB1/PTN/TNFAIP3/SFRP1/EPHA2/BAX/FGFR1/THBS4/THBS1/FGF7/ITGA4/VEGFC/VEGFB/BAD/KIT/MYC/PIK3CD/TGFB2/STAT6/TNF/SNAI2/SMAD3/FZD7/BMPR1A/BMP4/ID2/CCND1/ID1/DLG1/TCF7L2/CTNNB1/SULF1/SOX9	36
BP	GO:1903706	regulation of hemopoiesis	33/233	371/18800	5.38063e-19	9.31971e-17	4.55938e-17	MMP14/TGFB1/PTN/PTK2B/MITF/GPR137B/INPP5D/ADAM8/SFRP1/RUNX1/IL7/UBASH3B/AXL/FOS/SOCS5/CSF3R/IL7R/CSF1/BAD/JAK3/IL2RA/MYC/HCLS1/PTPRC/TNF/LEF1/TCF7/TGFBR2/BMP4/ID2/CTNNB1/LOX/GAS6	33
BP	GO:1903131	mononuclear cell differentiation	35/233	433/18800	9.10312e-19	1.51367e-16	7.40515e-17	MMP14/PTK2B/TP53/INPP5D/ADAM8/SFRP1/RUNX1/IL7/AXL/BAX/SOCS5/ITGB1/IL7R/CSF1/ITGA4/CD19/BAD/KIT/JAK3/IL2RA/MYC/PIK3CD/RELB/STAT6/PTPRC/BCL3/WNT4/LEF1/TCF7/FZD7/TGFBR2/BMP4/ID2/CTNNB1/GAS6	35
BP	GO:0022617	extracellular matrix disassembly	17/233	62/18800	9.62353e-19	1.53865e-16	7.52739e-17	MMP14/TGFB1/CTSK/MMP2/ADAM8/MMP9/CTSS/MMP7/PDPN/ADAMTS4/FLOT1/FSCN1/LRP1/MMP19/MMP11/SH3PXD2B/FURIN	17
BP	GO:0030098	lymphocyte differentiation	33/233	382/18800	1.31246e-18	2.02071e-16	9.88568e-17	MMP14/PTK2B/TP53/INPP5D/ADAM8/SFRP1/RUNX1/IL7/AXL/BAX/SOCS5/ITGB1/IL7R/ITGA4/CD19/BAD/KIT/JAK3/IL2RA/PIK3CD/RELB/STAT6/PTPRC/BCL3/WNT4/LEF1/TCF7/FZD7/TGFBR2/BMP4/ID2/CTNNB1/GAS6	33
BP	GO:1902105	regulation of leukocyte differentiation	29/233	283/18800	1.82747e-18	2.71314e-16	1.32732e-16	MMP14/TGFB1/MITF/GPR137B/INPP5D/ADAM8/SFRP1/RUNX1/IL7/UBASH3B/AXL/FOS/SOCS5/IL7R/CSF1/BAD/JAK3/IL2RA/MYC/HCLS1/PTPRC/TNF/LEF1/TCF7/TGFBR2/BMP4/ID2/CTNNB1/GAS6	29
BP	GO:0043410	positive regulation of MAPK cascade	36/233	491/18800	6.58647e-18	9.44137e-16	4.6189e-16	CDC42/RAF1/TGFB1/PTK2B/TGFB3/ADAM8/SHC1/FGFR1/LPAR3/PIK3CG/PDGFRA/LPAR1/THBS1/EFNA1/KIT/PDGFRB/PIK3R5/IGF1R/TRAF2/ARRB1/TGFB2/MAP4K1/GADD45A/PTPRC/CCL5/TNF/AXIN1/FZD4/DVL3/WNT7B/FZD7/BMP4/CTNNB1/SERPINF2/GAS6/SHC2	36
BP	GO:0097696	STAT cascade	24/233	184/18800	6.97883e-18	9.67033e-16	4.73091e-16	TGFB1/PTK2B/PRLR/SOCS2/SOCS5/IL7R/IFNAR2/KIT/JAK3/HCLS1/GADD45A/STAT6/PTPRC/CCL5/TNF/INPP5F/IL10RA/FYN/BCL3/NMI/SOCS3/CRLF3/MST1/NF2	24
BP	GO:0060562	epithelial tube morphogenesis	30/233	328/18800	1.11508e-17	1.49529e-15	7.31526e-16	MMP14/TGFB1/SFRP1/GREM1/EPHA2/TSC2/COL4A1/CSF1/LAMA5/MYC/PIK3CD/TGFB2/TNF/WNT4/LEF1/SMAD3/DVL3/FZD1/TEAD2/FZD2/TGFBR2/BMP4/FZD3/WNT6/DVL1/DLG1/FZD6/CTNNB1/FOXF1/SOX9	30
BP	GO:0033002	muscle cell proliferation	26/233	233/18800	1.42819e-17	1.8553e-15	9.07649e-16	TGFB1/S1PR1/TNFAIP3/TGFB3/MMP2/RUNX1/THBS1/ITGA2/CDKN1A/PDGFRB/MYC/IGF1R/TGFB2/CCL5/TNF/SMAD1/TGFBR2/BMPR1A/BMP4/ID2/TCF7L2/CTNNB1/MMP9/SERPINF2/EFEMP2/HBEGF	26
BP	GO:0048660	regulation of smooth muscle cell proliferation	23/233	170/18800	1.52503e-17	1.92108e-15	9.39828e-16	TGFB1/S1PR1/TNFAIP3/TGFB3/MMP2/THBS1/ITGA2/CDKN1A/PDGFRB/MYC/IGF1R/CCL5/TNF/TGFBR2/BMPR1A/BMP4/ID2/TCF7L2/CTNNB1/MMP9/SERPINF2/EFEMP2/HBEGF	23
BP	GO:0007160	cell-matrix adhesion	26/233	235/18800	1.76815e-17	2.15885e-15	1.05615e-15	PTK2/MMP14/PTK2B/SFRP1/GREM1/THBS3/TNXB/THBS1/ITGB1/ITGB4/ITGA6/FN1/ITGA2/CSF1/ITGA4/ITGA5/ITGB7/WNT4/NF2/ITGB2/SERPINE1/SMAD3/CTNNB1/EFEMP2/NID2/FBLN5	26
BP	GO:0045785	positive regulation of cell adhesion	34/233	446/18800	1.81765e-17	2.15885e-15	1.05615e-15	CDC42/RAC3/PTK2B/TGM2/ADAM8/SFRP1/RUNX1/IL7/SOCS5/MAGI1/FN1/ITGA2/IL7R/CSF1/ITGA4/BAD/ITGA5/JAK3/IL2RA/TGFB2/PTPRC/CCL5/TNF/FYN/WNT4/ITGB2/LEF1/SMAD3/TGFBR2/PDPN/SERPINF2/FOXF1/FLOT1/EFEMP2	34
BP	GO:0061448	connective tissue development	27/233	260/18800	2.1029e-17	2.42827e-15	1.18796e-15	TGFB1/TIMP1/CTSK/LTBP3/RUNX1/GREM1/PTH1R/THBS3/COL1A1/CSF1/PDGFRB/SNAI2/SMAD3/WNT7B/SMAD1/AXIN2/TGFBR2/BMPR1A/BMP4/CTNNB1/LOX/SULF1/COL27A1/SULF2/SOX9/SH3PXD2B/ADAMTS7	27
BP	GO:0007259	JAK-STAT cascade	23/233	173/18800	2.27094e-17	2.47343e-15	1.21005e-15	PTK2B/PRLR/SOCS2/SOCS5/IL7R/IFNAR2/KIT/JAK3/HCLS1/GADD45A/STAT6/PTPRC/CCL5/TNF/INPP5F/IL10RA/FYN/BCL3/NMI/SOCS3/CRLF3/MST1/NF2	23
BP	GO:0048659	smooth muscle cell proliferation	23/233	173/18800	2.27094e-17	2.47343e-15	1.21005e-15	TGFB1/S1PR1/TNFAIP3/TGFB3/MMP2/THBS1/ITGA2/CDKN1A/PDGFRB/MYC/IGF1R/CCL5/TNF/TGFBR2/BMPR1A/BMP4/ID2/TCF7L2/CTNNB1/MMP9/SERPINF2/EFEMP2/HBEGF	23
BP	GO:0050730	regulation of peptidyl-tyrosine phosphorylation	27/233	261/18800	2.32052e-17	2.47343e-15	1.21005e-15	TGFB1/PTK2B/TP53/SFRP1/GREM1/IL7/SHC1/SOCS5/THBS4/ANGPT4/ERBB3/FGF7/EFNA1/ITGA5/KIT/HCLS1/PTPRC/CCL5/TNF/INPP5F/FYN/SOCS3/NF2/ITGB2/DLG4/GAS6/HBEGF	27
BP	GO:0030199	collagen fibril organization	16/233	62/18800	3.04361e-17	3.16307e-15	1.54743e-15	GREM1/P3H4/TNXB/COL1A1/TGFB2/LOX/DPT/SERPINF2/FKBP10/CRTAP/EFEMP2/AEBP1/COL12A1/COL14A1/MMP11/ADAMTS7	16
BP	GO:0045453	bone resorption	16/233	63/18800	4.03535e-17	4.09145e-15	2.00161e-15	CTSK/S1PR1/PDK4/PTK2B/TNFAIP3/TPP1/GPR137B/INPP5D/ADAM8/LTBP3/IL7/UBASH3B/TMEM119/PTH1R/SPP1/CTNNB1	16
BP	GO:0048762	mesenchymal cell differentiation	26/233	244/18800	4.50521e-17	4.45909e-15	2.18147e-15	MAPK1/CDC42/TGFB1/TGFB3/SFRP1/GREM1/FGFR1/COL1A1/FN1/EFNA1/LAMA5/TGFB2/WWTR1/WNT4/LEF1/SNAI2/SMAD3/AXIN2/TGFBR2/BMPR1A/BMP4/SMAD2/TCF7L2/CTNNB1/PDPN/SOX9	26
BP	GO:0061138	morphogenesis of a branching epithelium	23/233	185/18800	1.03438e-16	9.99984e-15	4.89211e-15	MMP14/TGM2/SFRP1/GREM1/EPHA2/COL4A1/FGF7/CSF1/LAMA5/MYC/TNF/SOCS3/WNT4/LEF1/SNAI2/TGFBR2/BMP4/WNT6/DLG1/CTNNB1/SULF1/FOXF1/SOX9	23
BP	GO:2000027	regulation of animal organ morphogenesis	20/233	129/18800	1.38094e-16	1.30468e-14	6.38273e-15	CDC42/SFRP1/GREM1/FGF7/CSF1/TNF/WNT4/SNAI2/DVL3/FZD1/FZD7/FZD2/BMPR1A/BMP4/FZD3/DVL1/FZD6/CTNNB1/SULF1/SOX9	20
BP	GO:0002573	myeloid leukocyte differentiation	24/233	210/18800	1.53871e-16	1.42143e-14	6.9539e-15	CDC42/TGFB1/MITF/GPR137B/INPP5D/SFRP1/RUNX1/EPHA2/UBASH3B/FOS/CSF1/KIT/MYC/PIK3CD/RELB/HCLS1/TNF/LEF1/TGFBR2/BMP4/ID2/CTNNB1/MMP9/ANXA2	24
BP	GO:0048568	embryonic organ development	33/233	449/18800	1.66446e-16	1.49959e-14	7.33628e-15	MAPK1/CDC42/MMP14/TGFB1/TGFB3/TP53/EPHA2/PDGFRA/FLT3LG/EFNA1/KIT/TGFB2/TNF/SOCS3/LEF1/SMAD3/WNT7B/TEAD2/FZD2/TGFBR2/BMPR1A/BMP4/ID2/SMAD2/FZD3/DVL1/DLG1/TEAD1/FZD6/CTNNB1/MMP16/FOXF1/SOX9	33
BP	GO:0001667	ameboidal-type cell migration	34/233	480/18800	1.69547e-16	1.49959e-14	7.33628e-15	CDC42/PTK2/TGFB1/TIMP1/PTN/PTK2B/GREM1/EPHA2/FGFR1/PIK3CG/THBS1/ITGB1/ANGPT4/ITGB4/FN1/FGF7/ITGA2/ITGA4/ANGPT2/VEGFC/EFNA1/ITGB7/KIT/LAMA5/PIK3CD/TGFB2/GADD45A/TNF/TGFBR2/BMP4/ID1/MMP9/SOX9/HBEGF	34
BP	GO:0016331	morphogenesis of embryonic epithelium	21/233	150/18800	2.0059e-16	1.7372e-14	8.4987e-15	TGFB1/SFRP1/GREM1/TSC2/VEGFC/LAMA5/TGFB2/WNT4/DVL3/FZD1/WNT7B/TEAD2/FZD2/BMP4/FZD3/WNT6/DVL1/FZD6/CTNNB1/SULF1/SOX9	21
BP	GO:0060070	canonical Wnt signaling pathway	28/233	313/18800	2.60413e-16	2.20926e-14	1.08081e-14	TGFB1/MITF/SFRP1/GREM1/COL1A1/PPM1B/AXIN1/WWTR1/WNT4/CSNK1D/LEF1/SNAI2/SMAD3/FZD4/DVL3/FZD1/WNT7B/TCF7/FZD7/AXIN2/FZD2/FZD3/WNT6/DVL1/TCF7L2/FZD6/CTNNB1/SOX9	28
BP	GO:0010810	regulation of cell-substrate adhesion	24/233	217/18800	3.28059e-16	2.72748e-14	1.33434e-14	CDC42/PTK2/RAC3/MMP14/RAC2/PTK2B/SFRP1/GREM1/THBS1/COL1A1/FN1/CSF1/ANGPT2/ITGA5/WNT4/NF2/SERPINE1/SMAD3/FZD4/FZD7/PDPN/FOXF1/EFEMP2/FBLN1	24
BP	GO:0051216	cartilage development	23/233	195/18800	3.36192e-16	2.7403e-14	1.34061e-14	TGFB1/TIMP1/CTSK/LTBP3/RUNX1/GREM1/PTH1R/THBS3/COL1A1/SNAI2/SMAD3/WNT7B/SMAD1/AXIN2/TGFBR2/BMPR1A/BMP4/CTNNB1/SULF1/COL27A1/SULF2/SOX9/ADAMTS7	23
BP	GO:0030879	mammary gland development	20/233	135/18800	3.45352e-16	2.76082e-14	1.35065e-14	MAPK1/TGFB3/CAPN1/EPHA2/ELF3/BAX/PRLR/SOCS2/ITGA2/CSF1/STAT6/WNT4/LEF1/WNT7B/TGFBR2/BMP4/ID2/CCND1/FOXF1/SOX9	20
BP	GO:0001649	osteoblast differentiation	25/233	241/18800	3.53574e-16	2.77322e-14	1.35671e-14	PTK2/SFRP1/GREM1/EPHA2/TMEM119/PTH1R/SPP1/COL6A1/COL1A1/VEGFC/TNF/WWTR1/WNT4/LEF1/SNAI2/SMAD3/FZD1/WNT7B/SMAD1/AXIN2/BMPR1A/BMP4/CTNNB1/LOX/SOX9	25
BP	GO:0033627	cell adhesion mediated by integrin	17/233	86/18800	3.98403e-16	3.0112e-14	1.47314e-14	PTK2/RAC3/EPHA2/PIK3CG/ITGB1/ITGB4/ITGA6/ITGA2/ITGA4/EFNA1/ITGA5/ITGB7/TGFB2/CCL5/ITGB2/SNAI2/SERPINE1	17
BP	GO:0034103	regulation of tissue remodeling	17/233	86/18800	3.98403e-16	3.0112e-14	1.47314e-14	TGFB1/S1PR1/PDK4/TNFAIP3/TP53/GPR137B/INPP5D/ADAM8/SFRP1/LTBP3/SYT7/RUNX1/GREM1/UBASH3B/TMEM119/SPP1/THBS4	17
BP	GO:0001763	morphogenesis of a branching structure	23/233	199/18800	5.28278e-16	3.92152e-14	1.91848e-14	MMP14/TGM2/SFRP1/GREM1/EPHA2/COL4A1/FGF7/CSF1/LAMA5/MYC/TNF/SOCS3/WNT4/LEF1/SNAI2/TGFBR2/BMP4/WNT6/DLG1/CTNNB1/SULF1/FOXF1/SOX9	23
BP	GO:0030324	lung development	22/233	179/18800	6.31505e-16	4.60555e-14	2.25312e-14	MAPK1/CDC42/MMP14/TGFB3/LTBP3/PDGFRA/FGF7/PDGFRB/LAMA5/TNF/YWHAZ/WNT7B/TGFBR2/BMPR1A/BMP4/SMAD2/CTNNB1/LOX/PDPN/CRISPLD2/FOXF1/SOX9	22
BP	GO:0001655	urogenital system development	29/233	352/18800	6.60433e-16	4.73349e-14	2.31571e-14	MMP2/SFRP1/GREM1/BAX/PRLR/PDGFRA/COL4A1/ANGPT2/PDGFRB/LAMA5/MYC/TGFB2/AKR1B1/WWTR1/WNT4/SMAD3/WNT7B/SMAD1/BMP4/SMAD2/WNT6/DLG1/CTNNB1/MMP9/SULF1/MPV17/FOXF1/SULF2/SOX9	29
BP	GO:0050678	regulation of epithelial cell proliferation	30/233	382/18800	7.40152e-16	5.1326e-14	2.51097e-14	CDC42/TGFB1/PTN/TNFAIP3/SFRP1/BAX/FGFR1/THBS4/THBS1/FGF7/ITGA4/VEGFC/VEGFB/BAD/MYC/PIK3CD/TGFB2/TNF/SNAI2/SMAD3/FZD7/BMPR1A/BMP4/CCND1/ID1/DLG1/TCF7L2/CTNNB1/SULF1/SOX9	30
BP	GO:0050920	regulation of chemotaxis	24/233	225/18800	7.5316e-16	5.1326e-14	2.51097e-14	MAPK1/PTK2/TGFB1/S1PR1/PTN/RAC2/PTK2B/GREM1/FGFR1/PDGFRA/THBS4/THBS1/ITGA2/CSF1/ANGPT2/VEGFC/VEGFB/PDGFRB/DUSP1/CCL5/SERPINE1/SMAD3/GAS6/MMP28	24
BP	GO:0060348	bone development	24/233	225/18800	7.5316e-16	5.1326e-14	2.51097e-14	MMP14/TGFB3/TGM2/TP53/LTBP3/GREM1/TMEM119/THBS3/COL1A1/KIT/PTPRC/SMAD1/AXIN2/TGFBR2/BMP4/LOX/SULF1/MMP16/COL27A1/ANXA2/SULF2/SOX9/SH3PXD2B/ADAMTS7	24
BP	GO:0060541	respiratory system development	23/233	203/18800	8.21476e-16	5.50786e-14	2.69455e-14	MAPK1/CDC42/MMP14/TGFB3/LTBP3/PDGFRA/FGF7/PDGFRB/LAMA5/TNF/YWHAZ/LEF1/WNT7B/TGFBR2/BMPR1A/BMP4/SMAD2/CTNNB1/LOX/PDPN/CRISPLD2/FOXF1/SOX9	23
BP	GO:0001837	epithelial to mesenchymal transition	21/233	162/18800	9.93036e-16	6.55246e-14	3.20559e-14	TGFB1/TGFB3/SFRP1/GREM1/FGFR1/COL1A1/EFNA1/TGFB2/WWTR1/WNT4/LEF1/SNAI2/SMAD3/AXIN2/TGFBR2/BMP4/SMAD2/TCF7L2/CTNNB1/PDPN/SOX9	21
BP	GO:0030323	respiratory tube development	22/233	183/18800	1.01389e-15	6.58554e-14	3.22177e-14	MAPK1/CDC42/MMP14/TGFB3/LTBP3/PDGFRA/FGF7/PDGFRB/LAMA5/TNF/YWHAZ/WNT7B/TGFBR2/BMPR1A/BMP4/SMAD2/CTNNB1/LOX/PDPN/CRISPLD2/FOXF1/SOX9	22
BP	GO:0007492	endoderm development	16/233	78/18800	1.60756e-15	1.02809e-13	5.02963e-14	MMP14/MMP2/LAMA3/COL6A1/FN1/ITGA4/ITGA5/DUSP1/ITGB2/SMAD3/BMPR1A/BMP4/SMAD2/CTNNB1/MMP9/COL12A1	16
BP	GO:0002683	negative regulation of immune system process	31/233	425/18800	1.83194e-15	1.15385e-13	5.64484e-14	TGFB1/TNFAIP3/TGFB3/GPR137B/INPP5D/SFRP1/RUNX1/GREM1/UBASH3B/AXL/SOCS5/THBS1/IL7R/JAK3/IL2RA/MYC/TGFB2/DUSP1/STAT6/PTPRC/TNF/FYN/NMI/BMP4/ID2/DLG1/CTNNB1/FOXF1/SOX9/MMP28/FURIN	31
BP	GO:0072001	renal system development	27/233	312/18800	2.10118e-15	1.30144e-13	6.36688e-14	SFRP1/GREM1/BAX/PDGFRA/COL4A1/ANGPT2/PDGFRB/LAMA5/MYC/TGFB2/AKR1B1/WWTR1/WNT4/SMAD3/WNT7B/SMAD1/BMP4/SMAD2/WNT6/DLG1/CTNNB1/MMP9/SULF1/MPV17/FOXF1/SULF2/SOX9	27
BP	GO:0010718	positive regulation of epithelial to mesenchymal transition	14/233	53/18800	2.13559e-15	1.30144e-13	6.36688e-14	TGFB1/TGFB3/COL1A1/TGFB2/WWTR1/LEF1/SMAD3/AXIN2/TGFBR2/BMP4/SMAD2/TCF7L2/CTNNB1/PDPN	14
BP	GO:0030574	collagen catabolic process	13/233	42/18800	2.16019e-15	1.30144e-13	6.36688e-14	MMP14/CTSK/MMP2/ITGB1/MMP9/CTSS/MMP16/MMP7/MMP25/MMP19/MMP11/MMP28/FURIN	13
BP	GO:0030595	leukocyte chemotaxis	24/233	236/18800	2.23556e-15	1.3276e-13	6.49489e-14	MAPK1/PTK2/S1PR1/PTN/RAC2/PTK2B/ADAM8/GREM1/CSF3R/PIK3CG/THBS4/THBS1/CSF1/VEGFC/VEGFB/KIT/PIK3CD/TGFB2/DUSP1/CCL5/ITGB2/SERPINE1/GAS6/MMP28	24
BP	GO:0048661	positive regulation of smooth muscle cell proliferation	17/233	95/18800	2.32641e-15	1.3621e-13	6.66365e-14	TGFB1/S1PR1/MMP2/THBS1/ITGA2/PDGFRB/MYC/IGF1R/CCL5/TNF/TGFBR2/BMPR1A/BMP4/ID2/MMP9/SERPINF2/HBEGF	17
BP	GO:0043491	protein kinase B signaling	23/233	216/18800	3.22516e-15	1.86208e-13	9.10967e-14	PTK2/TGFB1/ADAM8/EPHA2/AXL/TSC2/FGFR1/PIK3CG/THBS1/ITGB1/PIK3CD/PIK3R5/IGF1R/HCLS1/CCL5/TNF/INPP5F/DLG1/TCF7L2/LOX/GAS6/SOX9/HBEGF	23
BP	GO:0035148	tube formation	20/233	152/18800	3.65867e-15	2.08344e-13	1.01926e-13	TGFB1/TGM2/SFRP1/GREM1/TSC2/PIK3CD/TGFB2/WNT4/YWHAZ/DVL3/FZD1/TEAD2/FZD2/BMP4/FZD3/WNT6/DVL1/FZD6/CTNNB1/SOX9	20
BP	GO:1904892	regulation of STAT cascade	18/233	116/18800	4.71933e-15	2.65112e-13	1.29698e-13	TGFB1/PTK2B/PRLR/SOCS2/IL7R/KIT/JAK3/GADD45A/PTPRC/CCL5/TNF/INPP5F/IL10RA/BCL3/SOCS3/CRLF3/MST1/NF2	18
BP	GO:1901342	regulation of vasculature development	28/233	351/18800	4.92292e-15	2.72861e-13	1.33489e-13	PTK2B/TNFAIP3/SFRP1/RUNX1/GREM1/EPHA2/THBS4/THBS1/ITGB1/ANGPT4/ANGPT2/VEGFC/VEGFB/EFNA1/ITGA5/THBS2/PIK3CD/TGFB2/GADD45A/TNF/WNT4/SERPINE1/SMAD1/TGFBR2/ID1/CTNNB1/SULF1/PRKCB	28
BP	GO:0097191	extrinsic apoptotic signaling pathway	23/233	221/18800	5.32064e-15	2.91025e-13	1.42375e-13	RAF1/TGFB1/TNFAIP3/SFRP1/IL7/NOL3/BAX/FGFR1/THBS1/ITGA6/ERBB3/BAD/TRAF2/TGFB2/PTPRC/TNF/SNAI2/SERPINE1/SMAD3/BMP4/PPP2R1B/TCF7L2/TNFRSF1B	23
BP	GO:1902107	positive regulation of leukocyte differentiation	20/233	157/18800	6.91323e-15	3.6844e-13	1.80248e-13	MMP14/TGFB1/INPP5D/ADAM8/RUNX1/IL7/AXL/FOS/SOCS5/IL7R/CSF1/BAD/IL2RA/HCLS1/PTPRC/TNF/LEF1/TGFBR2/ID2/GAS6	20
BP	GO:1903708	positive regulation of hemopoiesis	20/233	157/18800	6.91323e-15	3.6844e-13	1.80248e-13	MMP14/TGFB1/INPP5D/ADAM8/RUNX1/IL7/AXL/FOS/SOCS5/IL7R/CSF1/BAD/IL2RA/HCLS1/PTPRC/TNF/LEF1/TGFBR2/ID2/GAS6	20
BP	GO:0010717	regulation of epithelial to mesenchymal transition	17/233	102/18800	8.06273e-15	4.24263e-13	2.07558e-13	TGFB1/TGFB3/SFRP1/GREM1/COL1A1/EFNA1/TGFB2/WWTR1/LEF1/SMAD3/AXIN2/TGFBR2/BMP4/SMAD2/TCF7L2/CTNNB1/PDPN	17
BP	GO:0070661	leukocyte proliferation	27/233	330/18800	8.40102e-15	4.36538e-13	2.13563e-13	MAPK1/PTK2/RAC2/TNFAIP3/TP53/INPP5D/GREM1/IL7/BAX/PIK3CG/IL7R/CSF1/CD19/CDKN1A/KIT/JAK3/IL2RA/PTPRC/CCL5/FYN/WNT4/LEF1/TGFBR2/BMP4/DLG1/CTNNB1/TNFRSF1B	27
BP	GO:0050921	positive regulation of chemotaxis	19/233	140/18800	1.02408e-14	5.25567e-13	2.57117e-13	MAPK1/PTK2/TGFB1/S1PR1/PTN/RAC2/PTK2B/FGFR1/THBS4/THBS1/ITGA2/CSF1/VEGFC/VEGFB/PDGFRB/CCL5/SERPINE1/SMAD3/GAS6	19
BP	GO:0097529	myeloid leukocyte migration	23/233	229/18800	1.15374e-14	5.8489e-13	2.8614e-13	MAPK1/PTK2/MMP14/RAC2/PTK2B/ADAM8/GREM1/CSF3R/PIK3CG/THBS4/THBS1/CSF1/VEGFC/VEGFB/KIT/PIK3CD/IL1R1/TGFB2/DUSP1/CCL5/ITGB2/SERPINE1/MMP28	23
BP	GO:0002687	positive regulation of leukocyte migration	19/233	141/18800	1.17072e-14	5.86347e-13	2.86852e-13	MAPK1/PTK2/MMP14/PTN/RAC2/PTK2B/ADAM8/THBS4/THBS1/ITGA2/CSF1/ITGA4/VEGFC/VEGFB/IL1R1/CCL5/TNF/SERPINE1/GAS6	19
BP	GO:0046425	regulation of JAK-STAT cascade	17/233	105/18800	1.33289e-14	6.59624e-13	3.22701e-13	PTK2B/PRLR/SOCS2/IL7R/KIT/JAK3/GADD45A/PTPRC/CCL5/TNF/INPP5F/IL10RA/BCL3/SOCS3/CRLF3/MST1/NF2	17
BP	GO:0090130	tissue migration	28/233	366/18800	1.41708e-14	6.93034e-13	3.39046e-13	PTK2/TGFB1/PTN/PTK2B/GREM1/EPHA2/FGFR1/PIK3CG/THBS1/ITGB1/ANGPT4/FGF7/ITGA2/ANGPT2/VEGFC/EFNA1/KIT/PIK3CD/TGFB2/GADD45A/TNF/TGFBR2/BMP4/ID1/MMP9/FOXF1/SOX9/HBEGF	28
BP	GO:0050679	positive regulation of epithelial cell proliferation	22/233	211/18800	2.05476e-14	9.83907e-13	4.81346e-13	CDC42/PTN/TNFAIP3/SFRP1/FGFR1/THBS4/FGF7/ITGA4/VEGFC/VEGFB/BAD/MYC/PIK3CD/TNF/FZD7/BMPR1A/BMP4/CCND1/ID1/TCF7L2/CTNNB1/SOX9	22
BP	GO:0046850	regulation of bone remodeling	13/233	49/18800	2.05918e-14	9.83907e-13	4.81346e-13	S1PR1/PDK4/TNFAIP3/GPR137B/INPP5D/ADAM8/SFRP1/LTBP3/SYT7/GREM1/UBASH3B/TMEM119/SPP1	13
BP	GO:0002062	chondrocyte differentiation	17/233	110/18800	2.97193e-14	1.4039e-12	6.86815e-13	TGFB1/LTBP3/RUNX1/GREM1/PTH1R/SNAI2/SMAD3/AXIN2/TGFBR2/BMPR1A/BMP4/CTNNB1/SULF1/COL27A1/SULF2/SOX9/ADAMTS7	17
BP	GO:0031214	biomineral tissue development	20/233	170/18800	3.25722e-14	1.52138e-12	7.44287e-13	TGFB1/S1PR1/PTN/PTK2B/TGFB3/LTBP3/GREM1/TMEM119/PTH1R/SPP1/COL1A1/WNT4/SMAD3/AXIN2/BMPR1A/BMP4/WNT6/LOX/GAS6/SOX9	20
BP	GO:0002685	regulation of leukocyte migration	22/233	218/18800	4.05443e-14	1.86561e-12	9.12694e-13	MAPK1/PTK2/MMP14/PTN/RAC2/PTK2B/ADAM8/GREM1/THBS4/THBS1/ITGA2/CSF1/ITGA4/VEGFC/VEGFB/IL1R1/DUSP1/CCL5/TNF/SERPINE1/GAS6/MMP28	22
BP	GO:0110148	NA	20/233	172/18800	4.08398e-14	1.86561e-12	9.12694e-13	TGFB1/S1PR1/PTN/PTK2B/TGFB3/LTBP3/GREM1/TMEM119/PTH1R/SPP1/COL1A1/WNT4/SMAD3/AXIN2/BMPR1A/BMP4/WNT6/LOX/GAS6/SOX9	20
BP	GO:0010631	epithelial cell migration	27/233	358/18800	6.1172e-14	2.76405e-12	1.35222e-12	PTK2/TGFB1/PTN/PTK2B/GREM1/EPHA2/FGFR1/PIK3CG/THBS1/ITGB1/ANGPT4/FGF7/ITGA2/ANGPT2/VEGFC/EFNA1/KIT/PIK3CD/TGFB2/GADD45A/TNF/TGFBR2/BMP4/ID1/MMP9/SOX9/HBEGF	27
BP	GO:0001822	kidney development	25/233	303/18800	7.26426e-14	3.24705e-12	1.58852e-12	SFRP1/GREM1/BAX/PDGFRA/ANGPT2/PDGFRB/LAMA5/MYC/TGFB2/AKR1B1/WWTR1/WNT4/SMAD3/WNT7B/SMAD1/BMP4/SMAD2/WNT6/DLG1/CTNNB1/MMP9/SULF1/MPV17/SULF2/SOX9	25
BP	GO:0030099	myeloid cell differentiation	28/233	391/18800	7.38627e-14	3.26646e-12	1.59801e-12	CDC42/TGFB1/PTK2B/MITF/GPR137B/INPP5D/SFRP1/RUNX1/EPHA2/UBASH3B/FOS/CSF3R/CSF1/KIT/JAK3/MYC/PIK3CD/RELB/HCLS1/TNF/LEF1/TGFBR2/BMP4/ID2/CTNNB1/MMP9/LOX/ANXA2	28
BP	GO:0090132	epithelium migration	27/233	361/18800	7.48345e-14	3.2746e-12	1.602e-12	PTK2/TGFB1/PTN/PTK2B/GREM1/EPHA2/FGFR1/PIK3CG/THBS1/ITGB1/ANGPT4/FGF7/ITGA2/ANGPT2/VEGFC/EFNA1/KIT/PIK3CD/TGFB2/GADD45A/TNF/TGFBR2/BMP4/ID1/MMP9/SOX9/HBEGF	27
BP	GO:0072175	epithelial tube formation	18/233	136/18800	8.23108e-14	3.56423e-12	1.74369e-12	TGFB1/SFRP1/GREM1/TSC2/PIK3CD/TGFB2/WNT4/DVL3/FZD1/TEAD2/FZD2/BMP4/FZD3/WNT6/DVL1/FZD6/CTNNB1/SOX9	18
BP	GO:0071560	cellular response to transforming growth factor beta stimulus	23/233	252/18800	9.04675e-14	3.87705e-12	1.89673e-12	PTK2/TGFB1/TGFB3/TP53/SFRP1/LTBP3/FOS/THBS1/COL1A1/IGF1R/TGFB2/FYN/AXIN1/WNT4/SMAD3/SMAD1/TGFBR2/BMPR1A/SMAD2/ID1/LOX/SOX9/FURIN	23
BP	GO:0030278	regulation of ossification	17/233	118/18800	9.85635e-14	4.1809e-12	2.04538e-12	MAPK1/TGFB1/S1PR1/PTN/PTK2B/TGFB3/SFRP1/LTBP3/GREM1/TMEM119/CSF1/TGFB2/WNT4/SMAD3/BMPR1A/BMP4/SOX9	17
BP	GO:0001706	endoderm formation	13/233	55/18800	1.06573e-13	4.47497e-12	2.18924e-12	MMP14/MMP2/LAMA3/COL6A1/FN1/ITGA4/ITGA5/DUSP1/ITGB2/SMAD2/CTNNB1/MMP9/COL12A1	13
BP	GO:0071559	response to transforming growth factor beta	23/233	258/18800	1.49292e-13	6.20606e-12	3.03612e-12	PTK2/TGFB1/TGFB3/TP53/SFRP1/LTBP3/FOS/THBS1/COL1A1/IGF1R/TGFB2/FYN/AXIN1/WNT4/SMAD3/SMAD1/TGFBR2/BMPR1A/SMAD2/ID1/LOX/SOX9/FURIN	23
BP	GO:0045765	regulation of angiogenesis	26/233	345/18800	1.87237e-13	7.70636e-12	3.7701e-12	PTK2B/TNFAIP3/SFRP1/RUNX1/GREM1/EPHA2/THBS4/THBS1/ITGB1/ANGPT4/ANGPT2/VEGFC/VEGFB/EFNA1/ITGA5/THBS2/PIK3CD/TGFB2/GADD45A/TNF/SERPINE1/SMAD1/TGFBR2/CTNNB1/SULF1/PRKCB	26
BP	GO:0051896	regulation of protein kinase B signaling	20/233	187/18800	2.03166e-13	8.27999e-12	4.05073e-12	PTK2/TGFB1/ADAM8/EPHA2/AXL/TSC2/FGFR1/PIK3CG/THBS1/ITGB1/PIK3CD/PIK3R5/IGF1R/HCLS1/TNF/INPP5F/DLG1/TCF7L2/GAS6/HBEGF	20
BP	GO:0014065	phosphatidylinositol 3-kinase signaling	18/233	144/18800	2.25922e-13	9.11623e-12	4.45984e-12	PTK2/TSC2/FGFR1/PIK3CG/PDGFRA/FN1/ERBB3/PIK3AP1/KIT/PDGFRB/PIK3CD/PIK3R5/IGF1R/TGFB2/HCLS1/CCL5/TNF/SOX9	18
BP	GO:0001838	embryonic epithelial tube formation	17/233	124/18800	2.2807e-13	9.11623e-12	4.45984e-12	TGFB1/SFRP1/GREM1/TSC2/TGFB2/WNT4/DVL3/FZD1/TEAD2/FZD2/BMP4/FZD3/WNT6/DVL1/FZD6/CTNNB1/SOX9	17
BP	GO:0060249	anatomical structure homeostasis	25/233	319/18800	2.33095e-13	9.22834e-12	4.51468e-12	RAC3/CTSK/S1PR1/PDK4/PTK2B/TNFAIP3/TPP1/GPR137B/INPP5D/ADAM8/LTBP3/IL7/UBASH3B/TMEM119/BAX/PTH1R/SPP1/ITGB1/CSF1/PRKAA1/WWTR1/ACTB/CTNNB1/LOX/SOX9	25
BP	GO:0085029	extracellular matrix assembly	12/233	46/18800	2.65287e-13	1.04037e-11	5.08971e-12	TGFB1/LTBP3/TNXB/SMAD3/LOX/FKBP10/ANTXR1/EFEMP2/GAS6/SOX9/MFAP4/FBLN5	12
BP	GO:0007229	integrin-mediated signaling pathway	16/233	107/18800	2.95089e-13	1.14644e-11	5.60859e-12	CDC42/PTK2/TIMP1/PTN/PTK2B/LAMA3/ITGB1/ITGB4/ITGA6/FN1/ITGA2/ITGA4/ITGA5/ITGB7/LAMA5/ITGB2	16
BP	GO:0019221	cytokine-mediated signaling pathway	30/233	486/18800	4.31203e-13	1.65973e-11	8.11973e-12	PTK2B/TNFAIP3/TP53/IL7/NOL3/AXL/PRLR/SOCS5/CSF3R/IL3RA/IL7R/IL2RG/CSF1/BAD/IFNAR2/KIT/JAK3/IL2RA/OSMR/IL1R1/TRAF2/STAT6/PTPRC/CCL5/TNF/IL10RA/NMI/FZD4/GAS6/TNFRSF1B	30
BP	GO:0001894	tissue homeostasis	23/233	272/18800	4.56159e-13	1.73968e-11	8.51087e-12	RAC3/CTSK/S1PR1/PDK4/PTK2B/TNFAIP3/TPP1/GPR137B/INPP5D/ADAM8/LTBP3/IL7/UBASH3B/TMEM119/BAX/PTH1R/SPP1/ITGB1/CSF1/WWTR1/ACTB/CTNNB1/SOX9	23
BP	GO:0007162	negative regulation of cell adhesion	24/233	305/18800	6.61236e-13	2.49887e-11	1.22249e-11	PTK2/MMP14/TGFB1/MMP2/RUNX1/UBASH3B/SOCS5/THBS1/COL1A1/ERBB3/ANGPT2/JAK3/IL2RA/DUSP1/PTPRC/NF2/SNAI2/SERPINE1/FZD4/FZD7/BMP4/DLG1/FBLN1/ADAMTS18	24
BP	GO:0048015	phosphatidylinositol-mediated signaling	19/233	177/18800	7.7711e-13	2.91031e-11	1.42378e-11	PTK2/TSC2/FGFR1/PIK3CG/PDGFRA/FN1/ERBB3/PIK3AP1/KIT/PDGFRB/PIK3CD/PIK3R5/IGF1R/TGFB2/HCLS1/CCL5/TNF/INPP5F/SOX9	19
BP	GO:1903053	regulation of extracellular matrix organization	12/233	50/18800	7.92339e-13	2.93293e-11	1.43484e-11	TGFB1/RUNX1/TNXB/SMAD3/PDPN/ANTXR1/FSCN1/EFEMP2/AEBP1/LRP1/TNFRSF1B/SOX9	12
BP	GO:0009612	response to mechanical stimulus	20/233	201/18800	7.97259e-13	2.93293e-11	1.43484e-11	PTK2/RAF1/MMP14/PTN/PTK2B/MMP2/FOS/THBS1/COL1A1/ITGA2/ANGPT2/BAD/KIT/IGF1R/GADD45A/TNF/FYN/TGFBR2/CTNNB1/SOX9	20
BP	GO:0014068	positive regulation of phosphatidylinositol 3-kinase signaling	14/233	79/18800	8.31691e-13	3.03275e-11	1.48368e-11	PTK2/FGFR1/PDGFRA/FN1/ERBB3/PIK3AP1/KIT/PDGFRB/IGF1R/TGFB2/HCLS1/CCL5/TNF/SOX9	14
BP	GO:0048608	reproductive structure development	28/233	433/18800	9.02948e-13	3.26396e-11	1.59679e-11	MAPK1/PTK2/MMP14/PTN/MMP2/SFRP1/AXL/BAX/PRLR/SPP1/PDGFRA/KIT/PDGFRB/MYC/TGFB2/SOCS3/WNT4/LEF1/FZD4/WNT7B/BMP4/CCND1/DLG1/CTNNB1/SULF1/MMP19/PTX3/SOX9	28
BP	GO:0048705	skeletal system morphogenesis	21/233	228/18800	9.49687e-13	3.40332e-11	1.66497e-11	MMP14/TGFB3/MMP2/SFRP1/LTBP3/GREM1/TMEM119/THBS3/FGFR1/PDGFRA/COL1A1/SMAD3/AXIN2/TGFBR2/BMP4/SMAD2/DLG1/CTNNB1/MMP16/COL27A1/SOX9	21
BP	GO:0071900	regulation of protein serine/threonine kinase activity	26/233	372/18800	1.06606e-12	3.73477e-11	1.82712e-11	TGFB1/PTK2B/TNFAIP3/ADAM8/SFRP1/TNXB/FGFR1/PIK3CG/THBS1/CDKN1A/KIT/PDGFRB/PIK3R5/TRAF2/DUSP1/GADD45A/PTPRC/TNF/MST1/AXIN1/FZD4/DVL3/BMPR1A/BMP4/ACTB/CCND1	26
BP	GO:0061458	reproductive system development	28/233	436/18800	1.0674e-12	3.73477e-11	1.82712e-11	MAPK1/PTK2/MMP14/PTN/MMP2/SFRP1/AXL/BAX/PRLR/SPP1/PDGFRA/KIT/PDGFRB/MYC/TGFB2/SOCS3/WNT4/LEF1/FZD4/WNT7B/BMP4/CCND1/DLG1/CTNNB1/SULF1/MMP19/PTX3/SOX9	28
BP	GO:0045667	regulation of osteoblast differentiation	17/233	136/18800	1.06913e-12	3.73477e-11	1.82712e-11	PTK2/SFRP1/GREM1/TMEM119/VEGFC/TNF/WWTR1/WNT4/SNAI2/SMAD3/WNT7B/SMAD1/AXIN2/BMPR1A/BMP4/CTNNB1/SOX9	17
BP	GO:0045619	regulation of lymphocyte differentiation	19/233	181/18800	1.1638e-12	3.99828e-11	1.95604e-11	MMP14/INPP5D/ADAM8/SFRP1/RUNX1/IL7/AXL/SOCS5/IL7R/BAD/JAK3/IL2RA/PTPRC/LEF1/TCF7/TGFBR2/BMP4/ID2/GAS6	19
BP	GO:0048017	inositol lipid-mediated signaling	19/233	181/18800	1.1638e-12	3.99828e-11	1.95604e-11	PTK2/TSC2/FGFR1/PIK3CG/PDGFRA/FN1/ERBB3/PIK3AP1/KIT/PDGFRB/PIK3CD/PIK3R5/IGF1R/TGFB2/HCLS1/CCL5/TNF/INPP5F/SOX9	19
BP	GO:0043405	regulation of MAP kinase activity	19/233	183/18800	1.41868e-12	4.83398e-11	2.36487e-11	TGFB1/PTK2B/ADAM8/SFRP1/TNXB/FGFR1/PIK3CG/THBS1/KIT/PDGFRB/PIK3R5/TRAF2/DUSP1/PTPRC/TNF/AXIN1/FZD4/DVL3/BMP4	19
BP	GO:0051897	positive regulation of protein kinase B signaling	16/233	119/18800	1.60575e-12	5.42692e-11	2.65495e-11	PTK2/TGFB1/ADAM8/AXL/FGFR1/PIK3CG/THBS1/ITGB1/PIK3CD/PIK3R5/IGF1R/HCLS1/TNF/TCF7L2/GAS6/HBEGF	16
BP	GO:0010632	regulation of epithelial cell migration	23/233	290/18800	1.74098e-12	5.8365e-11	2.85533e-11	PTK2/TGFB1/PTN/PTK2B/EPHA2/FGFR1/PIK3CG/THBS1/ANGPT4/FGF7/ITGA2/ANGPT2/VEGFC/EFNA1/PIK3CD/TGFB2/GADD45A/TNF/TGFBR2/BMP4/MMP9/SOX9/HBEGF	23
BP	GO:0070167	regulation of biomineral tissue development	15/233	101/18800	1.84226e-12	6.12661e-11	2.99725e-11	TGFB1/S1PR1/PTN/PTK2B/TGFB3/LTBP3/GREM1/TMEM119/WNT4/SMAD3/BMPR1A/BMP4/WNT6/GAS6/SOX9	15
BP	GO:0030217	T cell differentiation	22/233	263/18800	1.87171e-12	6.17517e-11	3.02101e-11	TP53/ADAM8/RUNX1/IL7/SOCS5/IL7R/BAD/KIT/JAK3/IL2RA/PIK3CD/RELB/STAT6/PTPRC/BCL3/WNT4/LEF1/TCF7/FZD7/TGFBR2/BMP4/CTNNB1	22
BP	GO:0030282	bone mineralization	16/233	121/18800	2.0889e-12	6.83744e-11	3.34501e-11	TGFB1/S1PR1/PTN/PTK2B/TGFB3/LTBP3/GREM1/TMEM119/PTH1R/WNT4/SMAD3/AXIN2/BMPR1A/BMP4/LOX/SOX9	16
BP	GO:0070482	response to oxygen levels	24/233	324/18800	2.42681e-12	7.88145e-11	3.85575e-11	MMP14/PTK2B/TGFB3/MMP2/TP53/ADAM8/SFRP1/NOL3/THBS1/ANGPT4/COL1A1/ITGA2/ANGPT2/VEGFC/VEGFB/BAD/PDGFRB/MYC/PRKAA1/TGFB2/TNF/SMAD3/TGFBR2/PDPN	24
BP	GO:0110149	NA	15/233	103/18800	2.47332e-12	7.97022e-11	3.89919e-11	TGFB1/S1PR1/PTN/PTK2B/TGFB3/LTBP3/GREM1/TMEM119/WNT4/SMAD3/BMPR1A/BMP4/WNT6/GAS6/SOX9	15
BP	GO:0050731	positive regulation of peptidyl-tyrosine phosphorylation	19/233	190/18800	2.7826e-12	8.89789e-11	4.35302e-11	TGFB1/PTK2B/TP53/GREM1/THBS4/ANGPT4/ERBB3/FGF7/EFNA1/ITGA5/KIT/HCLS1/PTPRC/CCL5/TNF/FYN/DLG4/GAS6/HBEGF	19
BP	GO:0002688	regulation of leukocyte chemotaxis	16/233	124/18800	3.07067e-12	9.70173e-11	4.74627e-11	MAPK1/PTK2/PTN/RAC2/PTK2B/GREM1/THBS4/THBS1/CSF1/VEGFC/VEGFB/DUSP1/CCL5/SERPINE1/GAS6/MMP28	16
BP	GO:0072006	nephron development	17/233	145/18800	3.08066e-12	9.70173e-11	4.74627e-11	GREM1/PDGFRA/ANGPT2/PDGFRB/LAMA5/MYC/WWTR1/WNT4/WNT7B/BMP4/WNT6/DLG1/CTNNB1/SULF1/MPV17/SULF2/SOX9	17
BP	GO:0022407	regulation of cell-cell adhesion	28/233	456/18800	3.14378e-12	9.8261e-11	4.80712e-11	PTK2/TGFB1/ADAM8/RUNX1/IL7/UBASH3B/SOCS5/MAGI1/IL7R/ITGA4/BAD/JAK3/IL2RA/PTPRC/CCL5/TNF/FYN/WNT4/NF2/ITGB2/LEF1/TGFBR2/BMP4/DLG1/PDPN/SERPINF2/FLOT1/ADAMTS18	28
BP	GO:0043551	regulation of phosphatidylinositol 3-kinase activity	12/233	57/18800	4.27685e-12	1.32678e-10	6.49086e-11	CDC42/PTK2/TGFB1/PTK2B/SOCS2/SOCS5/PDGFRA/CD19/KIT/PDGFRB/PIK3R5/SOCS3	12
BP	GO:0032102	negative regulation of response to external stimulus	27/233	429/18800	4.4622e-12	1.37403e-10	6.722e-11	TNFAIP3/GREM1/UBASH3B/SOCS5/SPP1/PDGFRA/THBS1/ANGPT2/IL2RA/PPM1B/DUSP1/PTPRC/TNF/INPP5F/FYN/NMI/SOCS3/WNT4/SERPINE1/SMAD3/DVL1/SERPINF2/FOXF1/TNFRSF1B/ADAMTS18/MMP28/FURIN	27
BP	GO:0001707	mesoderm formation	13/233	73/18800	5.20423e-12	1.58615e-10	7.75973e-11	EPHA2/ITGB1/ITGB4/ITGA2/AXIN1/NF2/LEF1/SMAD3/SMAD1/BMPR1A/BMP4/SMAD2/FOXF1	13
BP	GO:0030111	regulation of Wnt signaling pathway	24/233	336/18800	5.26553e-12	1.58615e-10	7.75973e-11	TGFB1/TNFAIP3/SFRP1/GREM1/TSC2/COL1A1/PPM1B/AXIN1/WWTR1/CSNK1D/LEF1/SNAI2/SMAD3/FZD4/FZD1/FZD7/AXIN2/TCF7L2/FZD6/CTNNB1/SULF1/LRP1/SULF2/SOX9	24
BP	GO:0042113	B cell activation	24/233	336/18800	5.26553e-12	1.58615e-10	7.75973e-11	MMP14/TGFB1/PTK2B/TNFAIP3/TP53/INPP5D/SFRP1/IL7/BAX/ITGB1/IL7R/ITGA4/CD19/CDKN1A/BAD/KIT/JAK3/PIK3CD/STAT6/PTPRC/BCL3/LEF1/ID2/PRKCB	24
BP	GO:0007178	transmembrane receptor protein serine/threonine kinase signaling pathway	25/233	368/18800	5.56892e-12	1.66547e-10	8.14779e-11	PTK2/TGFB1/TGFB3/TP53/SFRP1/LTBP3/GREM1/FOS/THBS1/TGFB2/AXIN1/WWTR1/LEF1/SMAD3/FZD1/SMAD1/TGFBR2/BMPR1A/BMP4/SMAD2/ID1/LOX/SULF1/LRP1/FURIN	25
BP	GO:1902893	regulation of pri-miRNA transcription by RNA polymerase II	12/233	59/18800	6.62328e-12	1.96664e-10	9.62119e-11	TGFB1/TP53/FOS/MYC/TGFB2/TNF/SMAD3/SMAD1/BMPR1A/BMP4/TEAD1/SOX9	12
BP	GO:0060537	muscle tissue development	26/233	405/18800	7.3272e-12	2.16022e-10	1.05682e-10	CDC42/TGFB1/S1PR1/RUNX1/GREM1/FOS/PDGFRA/ITGB1/ERBB3/PDGFRB/PRKAA1/TGFB2/LEF1/SMAD3/FZD7/SMAD1/TGFBR2/BMPR1A/BMP4/ID2/DLG1/CTNNB1/LOX/FLOT1/EFEMP2/SOX9	26
BP	GO:0048754	branching morphogenesis of an epithelial tube	17/233	153/18800	7.41563e-12	2.1709e-10	1.06205e-10	MMP14/GREM1/EPHA2/COL4A1/CSF1/LAMA5/MYC/TNF/WNT4/LEF1/TGFBR2/BMP4/WNT6/DLG1/CTNNB1/FOXF1/SOX9	17
BP	GO:0048332	mesoderm morphogenesis	13/233	75/18800	7.472e-12	2.1721e-10	1.06263e-10	EPHA2/ITGB1/ITGB4/ITGA2/AXIN1/NF2/LEF1/SMAD3/SMAD1/BMPR1A/BMP4/SMAD2/FOXF1	13
BP	GO:0014066	regulation of phosphatidylinositol 3-kinase signaling	15/233	111/18800	7.54517e-12	2.17814e-10	1.06559e-10	PTK2/TSC2/FGFR1/PDGFRA/FN1/ERBB3/PIK3AP1/KIT/PDGFRB/IGF1R/TGFB2/HCLS1/CCL5/TNF/SOX9	15
BP	GO:0035987	endodermal cell differentiation	11/233	46/18800	7.6224e-12	2.18526e-10	1.06907e-10	MMP14/MMP2/LAMA3/COL6A1/FN1/ITGA4/ITGA5/ITGB2/CTNNB1/MMP9/COL12A1	11
BP	GO:0061614	pri-miRNA transcription by RNA polymerase II	12/233	60/18800	8.18928e-12	2.3317e-10	1.14071e-10	TGFB1/TP53/FOS/MYC/TGFB2/TNF/SMAD3/SMAD1/BMPR1A/BMP4/TEAD1/SOX9	12
BP	GO:0032103	positive regulation of response to external stimulus	27/233	442/18800	8.90354e-12	2.51782e-10	1.23177e-10	MAPK1/PTK2/TGFB1/S1PR1/PTN/RAC2/PTK2B/ADAM8/FGFR1/PIK3CG/THBS4/THBS1/ITGA2/CSF1/VEGFC/VEGFB/PDGFRB/OSMR/IGF1R/CCL5/TNF/FYN/NMI/SERPINE1/SMAD3/SERPINF2/GAS6	27
BP	GO:0043406	positive regulation of MAP kinase activity	15/233	116/18800	1.44647e-11	4.06281e-10	1.9876e-10	TGFB1/PTK2B/ADAM8/FGFR1/PIK3CG/THBS1/KIT/PDGFRB/PIK3R5/TRAF2/PTPRC/TNF/AXIN1/FZD4/DVL3	15
BP	GO:0062009	secondary palate development	9/233	26/18800	1.5377e-11	4.29009e-10	2.09879e-10	TGFB3/TGFB2/LEF1/FZD1/FZD2/TGFBR2/SMAD2/DLG1/MMP25	9
BP	GO:0002761	regulation of myeloid leukocyte differentiation	15/233	117/18800	1.64112e-11	4.5481e-10	2.22502e-10	TGFB1/MITF/GPR137B/INPP5D/SFRP1/RUNX1/UBASH3B/FOS/CSF1/MYC/HCLS1/TNF/LEF1/ID2/CTNNB1	15
BP	GO:0034329	cell junction assembly	26/233	420/18800	1.65239e-11	4.549e-10	2.22546e-10	CDC42/PTK2/MMP14/PTK2B/SFRP1/GREM1/EPHA2/THBS1/ITGB4/ITGA6/FN1/ITGA2/ITGA5/THBS2/TNF/WNT4/SNAI2/SMAD3/FZD1/ACTB/PATJ/DVL1/DLG1/CTNNB1/FLOT1/FSCN1	26
BP	GO:0048863	stem cell differentiation	19/233	211/18800	1.78381e-11	4.87849e-10	2.38665e-10	MAPK1/CDC42/PTN/TP53/SFRP1/LTBP3/PDGFRA/FN1/KIT/LAMA5/TGFB2/PTPRC/SNAI2/FZD1/TEAD2/BMPR1A/BMP4/CTNNB1/SOX9	19
BP	GO:0052547	regulation of peptidase activity	27/233	456/18800	1.82215e-11	4.95077e-10	2.42201e-10	MAPK12/RAF1/TIMP1/NOL3/BAX/COL6A3/THBS1/FN1/BAD/EFNA1/MYC/RPS6KA3/TNF/FYN/SERPINE1/SMAD3/BIRC5/BBC3/MMP9/SERPINF2/ANTXR1/GAS6/LRP1/FBLN1/PAPLN/ANXA2/FURIN	27
BP	GO:0060438	trachea development	8/233	18/18800	1.94124e-11	5.24009e-10	2.56355e-10	MAPK1/LEF1/WNT7B/TGFBR2/BMP4/CTNNB1/FOXF1/SOX9	8
BP	GO:0030500	regulation of bone mineralization	13/233	81/18800	2.07493e-11	5.56483e-10	2.72242e-10	TGFB1/S1PR1/PTN/PTK2B/TGFB3/LTBP3/GREM1/TMEM119/WNT4/SMAD3/BMPR1A/BMP4/SOX9	13
BP	GO:0030183	B cell differentiation	16/233	142/18800	2.5199e-11	6.71488e-10	3.28505e-10	MMP14/PTK2B/TP53/INPP5D/SFRP1/IL7/BAX/ITGB1/ITGA4/CD19/BAD/KIT/JAK3/PTPRC/BCL3/ID2	16
BP	GO:0032943	mononuclear cell proliferation	22/233	300/18800	2.53853e-11	6.72143e-10	3.28825e-10	RAC2/TP53/INPP5D/IL7/BAX/PIK3CG/IL7R/CSF1/CD19/CDKN1A/JAK3/IL2RA/PTPRC/CCL5/FYN/WNT4/LEF1/TGFBR2/BMP4/DLG1/CTNNB1/TNFRSF1B	22
BP	GO:1903034	regulation of response to wounding	17/233	166/18800	2.77304e-11	7.29591e-10	3.5693e-10	PTK2/PTN/TNFAIP3/UBASH3B/SPP1/PDGFRA/THBS1/ITGB1/IGF1R/TNF/INPP5F/WNT4/SERPINE1/SMAD3/SERPINF2/ADAMTS18/HBEGF	17
BP	GO:0045862	positive regulation of proteolysis	24/233	369/18800	3.76506e-11	9.84363e-10	4.81569e-10	MAPK12/PTK2/MMP14/PTK2B/ADAM8/BAX/SOCS5/FN1/BAD/EFNA1/MYC/TNF/FYN/AXIN1/CSNK1D/SMAD3/FBXW11/DVL1/BBC3/ANTXR1/FBLN1/ANXA2/TNFRSF1B/FURIN	24
BP	GO:2001233	regulation of apoptotic signaling pathway	24/233	370/18800	3.98274e-11	1.03476e-09	5.06227e-10	RAF1/TNFAIP3/TP53/SFRP1/IL7/NOL3/BAX/FGFR1/THBS1/ITGA6/BAD/MYC/TRAF2/PTPRC/TNF/WNT4/SNAI2/SERPINE1/BMP4/PPP2R1B/TCF7L2/BBC3/CTNNB1/MMP9	24
BP	GO:0043550	regulation of lipid kinase activity	12/233	69/18800	4.67641e-11	1.20744e-09	5.90704e-10	CDC42/PTK2/TGFB1/PTK2B/SOCS2/SOCS5/PDGFRA/CD19/KIT/PDGFRB/PIK3R5/SOCS3	12
BP	GO:0045124	regulation of bone resorption	10/233	41/18800	5.64516e-11	1.44858e-09	7.08671e-10	S1PR1/PDK4/TNFAIP3/GPR137B/INPP5D/ADAM8/LTBP3/UBASH3B/TMEM119/SPP1	10
BP	GO:0071674	mononuclear cell migration	18/233	199/18800	5.73922e-11	1.46368e-09	7.16059e-10	MAPK1/CDC42/PTK2/S1PR1/PTK2B/ADAM8/GREM1/PIK3CG/THBS1/CSF1/ITGA4/ITGB7/PIK3CD/DUSP1/CCL5/TNF/SERPINE1/GAS6	18
BP	GO:0045621	positive regulation of lymphocyte differentiation	14/233	107/18800	5.98506e-11	1.51707e-09	7.42178e-10	MMP14/INPP5D/ADAM8/RUNX1/IL7/AXL/SOCS5/IL7R/BAD/IL2RA/PTPRC/LEF1/TGFBR2/GAS6	14
BP	GO:1903829	positive regulation of cellular protein localization	26/233	446/18800	6.2305e-11	1.56971e-09	7.67932e-10	CDC42/TGFB1/RAC2/TGFB3/GPR137B/ADAM8/EPHA2/ITGB1/VEGFC/BAD/CHRM1/PRKAA1/TGFB2/HCLS1/TNF/FYN/WWTR1/ITGB2/SMAD3/DLG4/DVL1/DLG1/TCF7L2/BBC3/GAS6/LRP1	26
BP	GO:0001666	response to hypoxia	21/233	286/18800	7.17543e-11	1.79688e-09	8.79069e-10	MMP14/PTK2B/TGFB3/MMP2/TP53/ADAM8/SFRP1/NOL3/THBS1/ANGPT4/ITGA2/ANGPT2/VEGFC/VEGFB/BAD/MYC/PRKAA1/TGFB2/TNF/SMAD3/TGFBR2	21
BP	GO:0042476	odontogenesis	15/233	130/18800	7.62166e-11	1.8972e-09	9.28147e-10	TGFB3/BAX/PDGFRA/COL1A1/CSF1/LAMA5/TGFB2/NF2/LEF1/SERPINE1/AXIN2/BMPR1A/BMP4/WNT6/CTNNB1	15
BP	GO:0034446	substrate adhesion-dependent cell spreading	14/233	109/18800	7.71911e-11	1.91002e-09	9.34419e-10	CDC42/PTK2/RAC3/AXL/FN1/ITGA4/EFNA1/ITGB7/LAMA5/FZD4/FZD7/PDPN/ANTXR1/FBLN1	14
BP	GO:2001236	regulation of extrinsic apoptotic signaling pathway	16/233	153/18800	7.86942e-11	1.92883e-09	9.43619e-10	RAF1/TNFAIP3/SFRP1/IL7/NOL3/FGFR1/THBS1/ITGA6/TRAF2/PTPRC/TNF/SNAI2/SERPINE1/BMP4/PPP2R1B/TCF7L2	16
BP	GO:0035567	non-canonical Wnt signaling pathway	12/233	72/18800	7.88791e-11	1.92883e-09	9.43619e-10	CDC42/SFRP1/WNT4/CSNK1D/FZD4/DVL3/FZD1/FZD7/FZD2/FZD3/DVL1/FZD6	12
BP	GO:0010712	regulation of collagen metabolic process	10/233	43/18800	9.44759e-11	2.2967e-09	1.12359e-09	TGFB1/TGFB3/RUNX1/ITGB1/ITGA2/PDGFRB/WNT4/BMP4/SERPINF2/MFAP4	10
BP	GO:0007044	cell-substrate junction assembly	13/233	92/18800	1.09442e-10	2.64505e-09	1.29401e-09	PTK2/MMP14/PTK2B/SFRP1/GREM1/THBS1/ITGB4/ITGA6/FN1/ITGA2/ITGA5/WNT4/SMAD3	13
BP	GO:0045637	regulation of myeloid cell differentiation	18/233	208/18800	1.19459e-10	2.8635e-09	1.40088e-09	TGFB1/PTK2B/MITF/GPR137B/INPP5D/SFRP1/RUNX1/UBASH3B/FOS/CSF3R/CSF1/MYC/HCLS1/TNF/LEF1/ID2/CTNNB1/LOX	18
BP	GO:0048562	embryonic organ morphogenesis	21/233	294/18800	1.19858e-10	2.8635e-09	1.40088e-09	MAPK1/MMP14/TGFB3/EPHA2/PDGFRA/EFNA1/SMAD3/TEAD2/FZD2/TGFBR2/BMP4/ID2/SMAD2/FZD3/DVL1/DLG1/FZD6/CTNNB1/MMP16/FOXF1/SOX9	21
BP	GO:0022411	cellular component disassembly	26/233	460/18800	1.22372e-10	2.90687e-09	1.4221e-09	MMP14/TGFB1/CTSK/TGFB3/MMP2/TP53/ADAM8/BAX/TSC2/MYC/IGF1R/TNF/SNAI2/MMP9/CTSS/MMP7/PDPN/ADAMTS4/FLOT1/FSCN1/LRP1/MMP19/MMP11/SH3PXD2B/FURIN/PRKCB	26
BP	GO:0046651	lymphocyte proliferation	21/233	296/18800	1.35901e-10	3.19468e-09	1.5629e-09	RAC2/TP53/INPP5D/IL7/BAX/PIK3CG/IL7R/CD19/CDKN1A/JAK3/IL2RA/PTPRC/CCL5/FYN/WNT4/LEF1/TGFBR2/BMP4/DLG1/CTNNB1/TNFRSF1B	21
BP	GO:0045165	cell fate commitment	20/233	266/18800	1.36026e-10	3.19468e-09	1.5629e-09	CDC42/TP53/MITF/SFRP1/IL7/ITGB1/STAT6/WNT4/WNT7B/FZD7/SMAD1/BMPR1A/BMP4/ID2/SMAD2/WNT6/TCF7L2/CTNNB1/PDPN/SOX9	20
BP	GO:0001657	ureteric bud development	13/233	94/18800	1.44454e-10	3.33609e-09	1.63208e-09	SFRP1/GREM1/LAMA5/MYC/WNT4/SMAD3/SMAD1/BMP4/SMAD2/WNT6/DLG1/CTNNB1/SOX9	13
BP	GO:0001738	morphogenesis of a polarized epithelium	13/233	94/18800	1.44454e-10	3.33609e-09	1.63208e-09	CDC42/SFRP1/LAMA3/LAMA5/DVL3/FZD1/FZD7/FZD2/ACTB/FZD3/DVL1/FZD6/FOXF1	13
BP	GO:0002690	positive regulation of leukocyte chemotaxis	13/233	94/18800	1.44454e-10	3.33609e-09	1.63208e-09	MAPK1/PTK2/PTN/RAC2/PTK2B/THBS4/THBS1/CSF1/VEGFC/VEGFB/CCL5/SERPINE1/GAS6	13
BP	GO:1902895	positive regulation of pri-miRNA transcription by RNA polymerase II	10/233	45/18800	1.53827e-10	3.53291e-09	1.72837e-09	TGFB1/TP53/FOS/MYC/TGFB2/TNF/SMAD3/SMAD1/BMPR1A/TEAD1	10
BP	GO:0036293	response to decreased oxygen levels	21/233	299/18800	1.63764e-10	3.73988e-09	1.82962e-09	MMP14/PTK2B/TGFB3/MMP2/TP53/ADAM8/SFRP1/NOL3/THBS1/ANGPT4/ITGA2/ANGPT2/VEGFC/VEGFB/BAD/MYC/PRKAA1/TGFB2/TNF/SMAD3/TGFBR2	21
BP	GO:0072163	mesonephric epithelium development	13/233	95/18800	1.65537e-10	3.73988e-09	1.82962e-09	SFRP1/GREM1/LAMA5/MYC/WNT4/SMAD3/SMAD1/BMP4/SMAD2/WNT6/DLG1/CTNNB1/SOX9	13
BP	GO:0072164	mesonephric tubule development	13/233	95/18800	1.65537e-10	3.73988e-09	1.82962e-09	SFRP1/GREM1/LAMA5/MYC/WNT4/SMAD3/SMAD1/BMP4/SMAD2/WNT6/DLG1/CTNNB1/SOX9	13
BP	GO:0051098	regulation of binding	23/233	366/18800	1.94694e-10	4.37483e-09	2.14025e-09	CDC42/TGFB1/UBASH3B/BAX/ITGA2/ITGA4/CDKN1A/MYC/BCL3/LEF1/SMAD3/BMP4/ACTB/SMAD2/DVL1/ID1/TCF7L2/CTNNB1/MMP9/LOX/FLOT1/LRP1/ANXA2	23
BP	GO:0050867	positive regulation of cell activation	25/233	436/18800	2.1093e-10	4.71417e-09	2.30626e-09	SPHK2/MMP14/TGFB1/INPP5D/ADAM8/RUNX1/IL7/AXL/SOCS5/THBS1/IL7R/CDKN1A/BAD/PDGFRB/JAK3/IL2RA/STAT6/PTPRC/CCL5/TNF/FYN/ITGB2/LEF1/TGFBR2/GAS6	25
BP	GO:0072073	kidney epithelium development	15/233	140/18800	2.20954e-10	4.9118e-09	2.40295e-09	SFRP1/GREM1/LAMA5/MYC/WWTR1/WNT4/SMAD3/WNT7B/SMAD1/BMP4/SMAD2/WNT6/DLG1/CTNNB1/SOX9	15
BP	GO:1901654	response to ketone	17/233	190/18800	2.36491e-10	5.18154e-09	2.53491e-09	SPHK2/TGFB1/TGFB3/SFRP1/FOS/SPP1/THBS1/GNB1/GNG2/BAD/MYC/PRKAA1/IGF1R/TGFB2/MAP4K1/CCND1/GAS6	17
BP	GO:0007435	salivary gland morphogenesis	9/233	34/18800	2.36817e-10	5.18154e-09	2.53491e-09	CDC42/TGFB1/TGFB3/TGM2/FGF7/LAMA5/TGFB2/TNF/SNAI2	9
BP	GO:0051403	stress-activated MAPK cascade	19/233	245/18800	2.36828e-10	5.18154e-09	2.53491e-09	MAPK1/CDC42/PTK2B/SFRP1/MYC/IGF1R/TRAF2/TGFB2/MAP4K1/DUSP1/GADD45A/TNF/AXIN1/SMAD3/WNT7B/FZD7/BMP4/DLG1/SERPINF2	19
BP	GO:0032964	collagen biosynthetic process	10/233	47/18800	2.44329e-10	5.31768e-09	2.60151e-09	TGFB1/TGFB3/RUNX1/P3H4/COL1A1/ITGA2/PDGFRB/WNT4/BMP4/SERPINF2	10
BP	GO:0150115	NA	13/233	98/18800	2.46692e-10	5.34114e-09	2.61299e-09	PTK2/MMP14/PTK2B/SFRP1/GREM1/THBS1/ITGB4/ITGA6/FN1/ITGA2/ITGA5/WNT4/SMAD3	13
BP	GO:0001823	mesonephros development	13/233	99/18800	2.80898e-10	6.05021e-09	2.95988e-09	SFRP1/GREM1/LAMA5/MYC/WNT4/SMAD3/SMAD1/BMP4/SMAD2/WNT6/DLG1/CTNNB1/SOX9	13
BP	GO:0014706	striated muscle tissue development	19/233	248/18800	2.91391e-10	6.24388e-09	3.05463e-09	CDC42/TGFB1/S1PR1/RUNX1/GREM1/PDGFRA/ITGB1/ERBB3/PDGFRB/TGFB2/LEF1/SMAD3/FZD7/SMAD1/TGFBR2/BMPR1A/BMP4/ID2/LOX	19
BP	GO:0035272	exocrine system development	10/233	48/18800	3.05302e-10	6.50842e-09	3.18404e-09	CDC42/TGFB1/TGFB3/TGM2/FGF7/LAMA5/TGFB2/TNF/SNAI2/SOX9	10
BP	GO:0016049	cell growth	26/233	484/18800	3.67116e-10	7.78623e-09	3.80917e-09	CDC42/SPHK2/MMP14/TGFB1/PTK2B/TP53/SFRP1/GREM1/SOCS2/SPP1/LPAR3/ITGB1/FN1/ITGA4/CDKN1A/RPS6KA3/TGFB2/CRLF3/SMAD3/TGFBR2/DVL1/TEAD1/CTNNB1/SOX9/FBLN5/HBEGF	26
BP	GO:0031098	stress-activated protein kinase signaling cascade	19/233	252/18800	3.82397e-10	8.06915e-09	3.94758e-09	MAPK1/CDC42/PTK2B/SFRP1/MYC/IGF1R/TRAF2/TGFB2/MAP4K1/DUSP1/GADD45A/TNF/AXIN1/SMAD3/WNT7B/FZD7/BMP4/DLG1/SERPINF2	19
BP	GO:0090287	regulation of cellular response to growth factor stimulus	21/233	314/18800	4.02548e-10	8.45147e-09	4.13462e-09	TGFB1/TGFB3/TP53/SFRP1/GREM1/FGFR1/THBS1/VEGFC/ITGA5/AXIN1/WNT4/SMAD3/FZD4/FZD1/BMP4/SMAD2/CTNNB1/LOX/SULF1/SULF2/PRKCB	21
BP	GO:1905330	regulation of morphogenesis of an epithelium	11/233	65/18800	4.15938e-10	8.64656e-09	4.23006e-09	SFRP1/GREM1/FGF7/PIK3CD/TNF/WNT4/SNAI2/BMP4/CTNNB1/SULF1/SOX9	11
BP	GO:0007431	salivary gland development	9/233	36/18800	4.16e-10	8.64656e-09	4.23006e-09	CDC42/TGFB1/TGFB3/TGM2/FGF7/LAMA5/TGFB2/TNF/SNAI2	9
BP	GO:0003007	heart morphogenesis	19/233	254/18800	4.37208e-10	9.04215e-09	4.42359e-09	CDC42/PTK2/TGFB1/S1PR1/TP53/EFNA1/TGFB2/SNAI2/SMAD3/FZD1/TEAD2/AXIN2/FZD2/TGFBR2/BMPR1A/BMP4/CTNNB1/FOXF1/SOX9	19
BP	GO:2000377	regulation of reactive oxygen species metabolic process	15/233	147/18800	4.42094e-10	9.09795e-09	4.45089e-09	SPHK2/TGFB1/RAC2/PTK2B/TP53/THBS1/CDKN1A/PDGFRB/GADD45A/TNF/FYN/ITGB2/TGFBR2/MPV17/FBLN5	15
BP	GO:0032967	positive regulation of collagen biosynthetic process	8/233	25/18800	4.45233e-10	9.11742e-09	4.46042e-09	TGFB1/TGFB3/RUNX1/ITGA2/PDGFRB/WNT4/BMP4/SERPINF2	8
BP	GO:0032872	regulation of stress-activated MAPK cascade	17/233	198/18800	4.5041e-10	9.17822e-09	4.49016e-09	MAPK1/CDC42/PTK2B/SFRP1/MYC/IGF1R/TRAF2/TGFB2/DUSP1/GADD45A/TNF/AXIN1/WNT7B/FZD7/BMP4/DLG1/SERPINF2	17
BP	GO:0060425	lung morphogenesis	10/233	50/18800	4.69208e-10	9.51463e-09	4.65474e-09	MAPK1/CDC42/FGF7/TNF/WNT7B/TGFBR2/BMP4/CTNNB1/FOXF1/SOX9	10
BP	GO:0007179	transforming growth factor beta receptor signaling pathway	17/233	200/18800	5.26577e-10	1.06261e-08	5.19851e-09	PTK2/TGFB1/TGFB3/TP53/LTBP3/FOS/THBS1/TGFB2/AXIN1/SMAD3/SMAD1/TGFBR2/BMPR1A/SMAD2/ID1/LOX/FURIN	17
BP	GO:0010634	positive regulation of epithelial cell migration	16/233	174/18800	5.41702e-10	1.08785e-08	5.32198e-09	TGFB1/PTK2B/FGFR1/PIK3CG/THBS1/ANGPT4/FGF7/ITGA2/VEGFC/PIK3CD/TGFB2/TGFBR2/BMP4/MMP9/SOX9/HBEGF	16
BP	GO:0002696	positive regulation of leukocyte activation	24/233	421/18800	5.57563e-10	1.11432e-08	5.45148e-09	SPHK2/MMP14/TGFB1/INPP5D/ADAM8/RUNX1/IL7/AXL/SOCS5/THBS1/IL7R/CDKN1A/BAD/JAK3/IL2RA/STAT6/PTPRC/CCL5/TNF/FYN/ITGB2/LEF1/TGFBR2/GAS6	24
BP	GO:0070302	regulation of stress-activated protein kinase signaling cascade	17/233	201/18800	5.68967e-10	1.13167e-08	5.53636e-09	MAPK1/CDC42/PTK2B/SFRP1/MYC/IGF1R/TRAF2/TGFB2/DUSP1/GADD45A/TNF/AXIN1/WNT7B/FZD7/BMP4/DLG1/SERPINF2	17
BP	GO:2000106	regulation of leukocyte apoptotic process	12/233	85/18800	5.86228e-10	1.16045e-08	5.67716e-09	TP53/ADAM8/AXL/BAX/IL7R/EFNA1/JAK3/PIK3CD/HCLS1/CCL5/BMP4/GAS6	12
BP	GO:0002263	cell activation involved in immune response	20/233	289/18800	5.89857e-10	1.1621e-08	5.68523e-09	SPHK2/TGFB1/RAC2/PTK2B/TP53/SOCS5/PIK3CG/CD19/KIT/JAK3/PIK3CD/RELB/STAT6/PTPRC/BCL3/NMI/ITGB2/LEF1/FOXF1/LRP1	20
BP	GO:0010714	positive regulation of collagen metabolic process	8/233	26/18800	6.36281e-10	1.24765e-08	6.10375e-09	TGFB1/TGFB3/RUNX1/ITGA2/PDGFRB/WNT4/BMP4/SERPINF2	8
BP	GO:0022409	positive regulation of cell-cell adhesion	20/233	291/18800	6.65603e-10	1.29902e-08	6.35505e-09	ADAM8/RUNX1/IL7/SOCS5/MAGI1/IL7R/ITGA4/BAD/JAK3/IL2RA/PTPRC/CCL5/TNF/FYN/ITGB2/LEF1/TGFBR2/PDPN/SERPINF2/FLOT1	20
BP	GO:0061180	mammary gland epithelium development	11/233	68/18800	6.89551e-10	1.33947e-08	6.55294e-09	MAPK1/EPHA2/BAX/PRLR/CSF1/STAT6/WNT4/WNT7B/ID2/CCND1/FOXF1	11
BP	GO:0072132	mesenchyme morphogenesis	10/233	53/18800	8.62197e-10	1.66705e-08	8.15552e-09	MYC/TGFB2/LEF1/SNAI2/SMAD3/TGFBR2/BMPR1A/SMAD2/FOXF1/SOX9	10
BP	GO:0097305	response to alcohol	18/233	235/18800	8.74554e-10	1.68311e-08	8.2341e-09	SPHK2/TGFB1/PTK2B/SFRP1/FOS/GNB1/GNG2/BAD/MYC/PRKAA1/IGF1R/MAP4K1/TNF/FYN/TGFBR2/SMAD2/CCND1/CTNNB1	18
BP	GO:1903055	positive regulation of extracellular matrix organization	8/233	27/18800	8.94581e-10	1.71372e-08	8.38385e-09	TGFB1/RUNX1/TNXB/SMAD3/PDPN/FSCN1/EFEMP2/SOX9	8
BP	GO:0048511	rhythmic process	20/233	297/18800	9.50621e-10	1.79949e-08	8.80344e-09	PTN/TGFB3/MMP2/TP53/AXL/PDGFRA/PRKAA1/IGF1R/TGFB2/RELB/TNF/CSNK1D/FZD4/FBXW11/ID2/ID1/PPP1CB/NFKB2/MMP19/PTX3	20
BP	GO:0071887	leukocyte apoptotic process	13/233	109/18800	9.51838e-10	1.79949e-08	8.80344e-09	TP53/ADAM8/AXL/BAX/IL7R/EFNA1/JAK3/IL2RA/PIK3CD/HCLS1/CCL5/BMP4/GAS6	13
BP	GO:0061035	regulation of cartilage development	11/233	70/18800	9.5234e-10	1.79949e-08	8.80344e-09	CTSK/LTBP3/GREM1/SNAI2/SMAD3/SMAD1/AXIN2/BMP4/CTNNB1/SOX9/ADAMTS7	11
BP	GO:0071902	positive regulation of protein serine/threonine kinase activity	17/233	208/18800	9.66077e-10	1.81719e-08	8.89002e-09	TGFB1/PTK2B/ADAM8/FGFR1/PIK3CG/THBS1/KIT/PDGFRB/PIK3R5/TRAF2/PTPRC/TNF/AXIN1/FZD4/DVL3/BMPR1A/CCND1	17
BP	GO:0007498	mesoderm development	14/233	132/18800	1.02511e-09	1.91955e-08	9.39081e-09	EPHA2/ITGB1/ITGB4/ITGA2/AXIN1/NF2/LEF1/SMAD3/SMAD1/TEAD2/BMPR1A/BMP4/SMAD2/FOXF1	14
BP	GO:0062197	NA	21/233	332/18800	1.10742e-09	2.06437e-08	1.00993e-08	MAPK1/TNFAIP3/MMP2/TP53/NOL3/AXL/FOS/PDGFRA/BAD/MYC/PRKAA1/RELB/AKR1B1/STAT6/TNF/FYN/FZD1/CTNNB1/MMP9/MPV17/FBLN5	21
BP	GO:0001843	neural tube closure	12/233	90/18800	1.15568e-09	2.14471e-08	1.04923e-08	TGFB1/SFRP1/TSC2/TGFB2/DVL3/FZD1/TEAD2/FZD2/BMP4/FZD3/DVL1/FZD6	12
BP	GO:0046851	negative regulation of bone remodeling	7/233	18/18800	1.16308e-09	2.14886e-08	1.05126e-08	TNFAIP3/GPR137B/INPP5D/SFRP1/GREM1/UBASH3B/TMEM119	7
BP	GO:0060021	roof of mouth development	12/233	91/18800	1.31679e-09	2.41141e-08	1.17971e-08	TGFB3/PDGFRA/TGFB2/LEF1/SNAI2/FZD1/FZD2/TGFBR2/BMPR1A/SMAD2/DLG1/MMP25	12
BP	GO:0060606	tube closure	12/233	91/18800	1.31679e-09	2.41141e-08	1.17971e-08	TGFB1/SFRP1/TSC2/TGFB2/DVL3/FZD1/TEAD2/FZD2/BMP4/FZD3/DVL1/FZD6	12
BP	GO:0007565	female pregnancy	16/233	185/18800	1.33762e-09	2.43881e-08	1.19311e-08	SPHK2/TIMP1/PTN/TGFB3/MMP2/FOS/PRLR/SPP1/ITGB4/ITGA2/ANGPT2/ITGA5/WNT4/TGFBR2/MMP9/FBLN1	16
BP	GO:0048251	elastic fiber assembly	6/233	11/18800	1.49075e-09	2.70614e-08	1.32389e-08	LTBP3/TNXB/LOX/EFEMP2/MFAP4/FBLN5	6
BP	GO:0060993	kidney morphogenesis	12/233	93/18800	1.70116e-09	3.07466e-08	1.50418e-08	GREM1/PDGFRB/LAMA5/MYC/WWTR1/WNT4/WNT7B/BMP4/WNT6/DLG1/CTNNB1/SOX9	12
BP	GO:0060350	endochondral bone morphogenesis	10/233	57/18800	1.82852e-09	3.29054e-08	1.6098e-08	MMP14/TMEM119/THBS3/COL1A1/AXIN2/TGFBR2/BMP4/MMP16/COL27A1/SOX9	10
BP	GO:0071496	cellular response to external stimulus	20/233	309/18800	1.88961e-09	3.38582e-08	1.65641e-08	MAPK1/PDK4/TP53/SFRP1/AXL/FOS/COL1A1/ITGA2/ITGA4/CDKN1A/BAD/PRKAA1/IGF1R/MAX/GADD45A/PTPRC/WNT4/SNAI2/GAS6/SOX9	20
BP	GO:0061326	renal tubule development	12/233	94/18800	1.92897e-09	3.44152e-08	1.68366e-08	GREM1/COL4A1/LAMA5/MYC/WWTR1/WNT4/WNT7B/BMP4/WNT6/DLG1/CTNNB1/SOX9	12
BP	GO:0071675	regulation of mononuclear cell migration	13/233	116/18800	2.07512e-09	3.68644e-08	1.80348e-08	MAPK1/PTK2/PTK2B/ADAM8/GREM1/THBS1/CSF1/ITGA4/DUSP1/CCL5/TNF/SERPINE1/GAS6	13
BP	GO:0043542	endothelial cell migration	19/233	279/18800	2.109e-09	3.73068e-08	1.82512e-08	PTK2/TGFB1/PTN/PTK2B/GREM1/EPHA2/FGFR1/PIK3CG/THBS1/ITGB1/ANGPT4/ANGPT2/VEGFC/EFNA1/PIK3CD/GADD45A/TNF/BMP4/ID1	19
BP	GO:0048010	vascular endothelial growth factor receptor signaling pathway	10/233	58/18800	2.18567e-09	3.84993e-08	1.88346e-08	PTK2/PTK2B/AXL/VEGFC/VEGFB/ITGA5/FYN/FZD4/SULF1/PRKCB	10
BP	GO:0061037	negative regulation of cartilage development	8/233	30/18800	2.28407e-09	4.00628e-08	1.95995e-08	CTSK/LTBP3/GREM1/SNAI2/BMP4/CTNNB1/SOX9/ADAMTS7	8
BP	GO:1901214	regulation of neuron death	20/233	313/18800	2.35866e-09	4.11972e-08	2.01545e-08	CDC42/PTK2B/TGFB3/TP53/ADAM8/AXL/BAX/FOS/ERBB3/CSF1/BAD/TRAF2/TGFB2/CCL5/TNF/FYN/ITGB2/FZD1/CTNNB1/TNFRSF1B	20
BP	GO:0007159	leukocyte cell-cell adhesion	22/233	381/18800	2.39403e-09	4.164e-08	2.03711e-08	RAC2/ADAM8/RUNX1/IL7/SOCS5/ITGB1/IL7R/ITGA4/BAD/ITGA5/ITGB7/JAK3/IL2RA/PTPRC/CCL5/TNF/FYN/ITGB2/LEF1/TGFBR2/BMP4/DLG1	22
BP	GO:0014020	primary neural tube formation	12/233	96/18800	2.46886e-09	4.27627e-08	2.09203e-08	TGFB1/SFRP1/TSC2/TGFB2/DVL3/FZD1/TEAD2/FZD2/BMP4/FZD3/DVL1/FZD6	12
BP	GO:0060443	mammary gland morphogenesis	9/233	44/18800	2.87412e-09	4.95756e-08	2.42534e-08	CAPN1/EPHA2/ELF3/BAX/CSF1/STAT6/WNT4/TGFBR2/BMP4	9
BP	GO:0009950	dorsal/ventral axis specification	6/233	12/18800	2.95066e-09	5.06855e-08	2.47963e-08	SFRP1/AXIN1/AXIN2/BMPR1A/SMAD2/CTNNB1	6
BP	GO:0002366	leukocyte activation involved in immune response	19/233	285/18800	2.99922e-09	5.13077e-08	2.51007e-08	SPHK2/TGFB1/RAC2/PTK2B/TP53/SOCS5/PIK3CG/CD19/KIT/JAK3/PIK3CD/RELB/STAT6/PTPRC/BCL3/NMI/ITGB2/LEF1/FOXF1	19
BP	GO:0070663	regulation of leukocyte proliferation	18/233	254/18800	3.03036e-09	5.16279e-08	2.52574e-08	MAPK1/PTK2/RAC2/TNFAIP3/INPP5D/GREM1/IL7/CSF1/CDKN1A/JAK3/IL2RA/PTPRC/CCL5/TGFBR2/BMP4/DLG1/CTNNB1/TNFRSF1B	18
BP	GO:0060349	bone morphogenesis	12/233	98/18800	3.14131e-09	5.32997e-08	2.60752e-08	MMP14/TGFB3/LTBP3/TMEM119/THBS3/COL1A1/AXIN2/TGFBR2/BMP4/MMP16/COL27A1/SOX9	12
BP	GO:0070997	neuron death	21/233	353/18800	3.31986e-09	5.61002e-08	2.74453e-08	CDC42/PTK2B/TGFB3/TP53/ADAM8/AXL/BAX/FOS/ERBB3/CSF1/BAD/TRAF2/TGFB2/MAX/CCL5/TNF/FYN/ITGB2/FZD1/CTNNB1/TNFRSF1B	21
BP	GO:1901861	regulation of muscle tissue development	9/233	45/18800	3.5542e-09	5.9817e-08	2.92636e-08	TGFB1/ERBB3/PRKAA1/LEF1/SMAD3/BMP4/CTNNB1/LOX/FLOT1	9
BP	GO:0042063	gliogenesis	19/233	291/18800	4.22701e-09	7.08535e-08	3.46629e-08	MAPK1/MMP14/TGFB1/PTN/PTK2B/ITGB4/ERBB3/CSF1/CHRM1/MYC/TGFB2/TNF/NF2/LEF1/ID2/CTNNB1/LRP1/TNFRSF1B/SOX9	19
BP	GO:0071772	response to BMP	15/233	173/18800	4.29087e-09	7.13485e-08	3.49051e-08	TGFB1/TGFB3/SFRP1/GREM1/TGFB2/LEF1/SMAD3/FZD1/SMAD1/BMPR1A/BMP4/SMAD2/SULF1/SOX9/ADAMTS7	15
BP	GO:0071773	cellular response to BMP stimulus	15/233	173/18800	4.29087e-09	7.13485e-08	3.49051e-08	TGFB1/TGFB3/SFRP1/GREM1/TGFB2/LEF1/SMAD3/FZD1/SMAD1/BMPR1A/BMP4/SMAD2/SULF1/SOX9/ADAMTS7	15
BP	GO:0060828	regulation of canonical Wnt signaling pathway	18/233	261/18800	4.65689e-09	7.71263e-08	3.77317e-08	TGFB1/SFRP1/GREM1/COL1A1/PPM1B/AXIN1/WWTR1/CSNK1D/SNAI2/SMAD3/FZD4/FZD1/FZD7/AXIN2/TCF7L2/FZD6/CTNNB1/SOX9	18
BP	GO:0048144	fibroblast proliferation	11/233	81/18800	4.73479e-09	7.81052e-08	3.82105e-08	TP53/SFRP1/BAX/PDGFRA/FN1/CDKN1A/PDGFRB/MYC/WNT7B/CTNNB1/GAS6	11
BP	GO:0072593	reactive oxygen species metabolic process	17/233	231/18800	4.78381e-09	7.8602e-08	3.84536e-08	SPHK2/TGFB1/PDK4/RAC2/PTK2B/TP53/THBS1/CDKN1A/PDGFRB/GADD45A/TNF/FYN/ITGB2/TGFBR2/MPV17/SH3PXD2B/FBLN5	17
BP	GO:0002274	myeloid leukocyte activation	17/233	232/18800	5.10586e-09	8.35633e-08	4.08808e-08	SPHK2/RAC2/GPR137B/PIK3CG/THBS1/FN1/CSF1/KIT/PIK3CD/RELB/PTPRC/CCL5/TNF/NMI/ITGB2/TGFBR2/FOXF1	17
BP	GO:0000302	response to reactive oxygen species	16/233	203/18800	5.15637e-09	8.4059e-08	4.11233e-08	MAPK1/PTK2B/TNFAIP3/MMP2/AXL/FOS/PDGFRA/COL1A1/BAD/PDGFRB/PRKAA1/STAT6/FYN/MMP9/MPV17/FBLN5	16
BP	GO:0043552	positive regulation of phosphatidylinositol 3-kinase activity	8/233	33/18800	5.2474e-09	8.52087e-08	4.16857e-08	CDC42/PTK2/TGFB1/PTK2B/PDGFRA/CD19/KIT/PDGFRB	8
BP	GO:0001818	negative regulation of cytokine production	21/233	363/18800	5.4432e-09	8.80442e-08	4.30729e-08	TGFB1/TNFAIP3/TGFB3/INPP5D/EPHA2/AXL/SOCS5/THBS1/FN1/JAK3/PPM1B/ARRB1/TGFB2/RELB/PTPRC/TNF/BCL3/NMI/LEF1/GAS6/FURIN	21
BP	GO:0044703	multi-organism reproductive process	16/233	205/18800	5.93745e-09	9.54335e-08	4.66879e-08	SPHK2/TIMP1/PTN/TGFB3/MMP2/FOS/PRLR/SPP1/ITGB4/ITGA2/ANGPT2/ITGA5/WNT4/TGFBR2/MMP9/FBLN1	16
BP	GO:0050918	positive chemotaxis	10/233	64/18800	5.94594e-09	9.54335e-08	4.66879e-08	S1PR1/TSC2/FGF7/ITGA2/ANGPT2/VEGFC/VEGFB/CCL5/SMAD3/BMP4	10
BP	GO:0034104	negative regulation of tissue remodeling	7/233	22/18800	5.9751e-09	9.55326e-08	4.67364e-08	TNFAIP3/GPR137B/INPP5D/SFRP1/GREM1/UBASH3B/TMEM119	7
BP	GO:0060395	SMAD protein signal transduction	11/233	83/18800	6.16828e-09	9.82434e-08	4.80626e-08	TGFB1/TGFB3/FOS/TGFB2/WWTR1/SMAD3/SMAD1/BMPR1A/BMP4/SMAD2/LRP1	11
BP	GO:0001841	neural tube formation	12/233	104/18800	6.2615e-09	9.93475e-08	4.86027e-08	TGFB1/SFRP1/TSC2/TGFB2/DVL3/FZD1/TEAD2/FZD2/BMP4/FZD3/DVL1/FZD6	12
BP	GO:0048706	embryonic skeletal system development	13/233	127/18800	6.36135e-09	1.00548e-07	4.919e-08	MMP14/TGFB3/PDGFRA/COL1A1/SMAD3/TGFBR2/BMP4/SMAD2/DLG1/CTNNB1/SULF1/MMP16/SULF2	13
BP	GO:0033628	regulation of cell adhesion mediated by integrin	9/233	48/18800	6.51282e-09	1.02552e-07	5.01705e-08	PTK2/RAC3/EPHA2/PIK3CG/EFNA1/TGFB2/CCL5/SNAI2/SERPINE1	9
BP	GO:0045936	negative regulation of phosphate metabolic process	23/233	440/18800	6.77764e-09	1.06319e-07	5.20135e-08	TGFB1/TNFAIP3/TP53/SFRP1/GREM1/UBASH3B/BAX/SOCS5/TSC2/CDKN1A/TGFB2/DUSP1/GADD45A/PTPRC/TNF/INPP5F/SOCS3/WWTR1/NF2/BMP4/DVL1/LRP1/FBLN1	23
BP	GO:0010563	negative regulation of phosphorus metabolic process	23/233	441/18800	7.07304e-09	1.10536e-07	5.40764e-08	TGFB1/TNFAIP3/TP53/SFRP1/GREM1/UBASH3B/BAX/SOCS5/TSC2/CDKN1A/TGFB2/DUSP1/GADD45A/PTPRC/TNF/INPP5F/SOCS3/WWTR1/NF2/BMP4/DVL1/LRP1/FBLN1	23
BP	GO:0007517	muscle organ development	20/233	334/18800	7.14958e-09	1.11314e-07	5.44569e-08	MAPK12/TGFB1/S1PR1/FOS/COL6A3/ERBB3/LAMA5/PRKAA1/TGFB2/LEF1/SMAD3/FZD1/FZD2/BMPR1A/BMP4/CTNNB1/LOX/FLOT1/EFEMP2/HBEGF	20
BP	GO:0070371	ERK1 and ERK2 cascade	20/233	335/18800	7.52084e-09	1.16657e-07	5.70709e-08	MAPK1/TGFB1/PTK2B/EPHA2/SHC1/PDGFRA/FN1/PDGFRB/MYC/ARRB1/PTPRC/CCL5/TNF/YWHAZ/BMP4/DLG1/SERPINF2/GAS6/FBLN1/SOX9	20
BP	GO:0097530	granulocyte migration	14/233	154/18800	7.74894e-09	1.19748e-07	5.85833e-08	MAPK1/PTK2/RAC2/ADAM8/CSF3R/PIK3CG/THBS4/THBS1/CSF1/PIK3CD/IL1R1/TGFB2/CCL5/ITGB2	14
BP	GO:1904894	positive regulation of STAT cascade	9/233	49/18800	7.89282e-09	1.2152e-07	5.945e-08	TGFB1/PTK2B/PRLR/IL7R/KIT/CCL5/TNF/IL10RA/CRLF3	9
BP	GO:0048565	digestive tract development	13/233	130/18800	8.46692e-09	1.29878e-07	6.35389e-08	TGFB3/SFRP1/PDGFRA/KIT/TGFB2/TNF/SMAD3/TGFBR2/BMP4/ID2/SMAD2/CTNNB1/FOXF1	13
BP	GO:0032331	negative regulation of chondrocyte differentiation	7/233	23/18800	8.49899e-09	1.29891e-07	6.35451e-08	LTBP3/GREM1/SNAI2/BMP4/CTNNB1/SOX9/ADAMTS7	7
BP	GO:0045766	positive regulation of angiogenesis	15/233	183/18800	9.2541e-09	1.40399e-07	6.86858e-08	PTK2B/RUNX1/GREM1/THBS1/ITGB1/ANGPT4/ANGPT2/VEGFC/VEGFB/ITGA5/PIK3CD/SERPINE1/SMAD1/TGFBR2/PRKCB	15
BP	GO:1904018	positive regulation of vasculature development	15/233	183/18800	9.2541e-09	1.40399e-07	6.86858e-08	PTK2B/RUNX1/GREM1/THBS1/ITGB1/ANGPT4/ANGPT2/VEGFC/VEGFB/ITGA5/PIK3CD/SERPINE1/SMAD1/TGFBR2/PRKCB	15
BP	GO:0071300	cellular response to retinoic acid	10/233	67/18800	9.42389e-09	1.42455e-07	6.96917e-08	PTK2B/COL1A1/MYC/TNF/FZD4/WNT7B/FZD7/TEAD2/WNT6/SOX9	10
BP	GO:0070231	T cell apoptotic process	9/233	50/18800	9.5224e-09	1.43422e-07	7.0165e-08	TP53/ADAM8/BAX/IL7R/EFNA1/JAK3/IL2RA/CCL5/BMP4	9
BP	GO:0001933	negative regulation of protein phosphorylation	20/233	341/18800	1.01502e-08	1.52326e-07	7.45207e-08	TGFB1/TNFAIP3/SFRP1/GREM1/UBASH3B/BAX/SOCS5/TSC2/CDKN1A/DUSP1/GADD45A/PTPRC/INPP5F/SOCS3/WWTR1/NF2/BMP4/DVL1/LRP1/FBLN1	20
BP	GO:0044706	multi-multicellular organism process	16/233	213/18800	1.02713e-08	1.53589e-07	7.51389e-08	SPHK2/TIMP1/PTN/TGFB3/MMP2/FOS/PRLR/SPP1/ITGB4/ITGA2/ANGPT2/ITGA5/WNT4/TGFBR2/MMP9/FBLN1	16
BP	GO:0032526	response to retinoic acid	12/233	109/18800	1.07491e-08	1.60157e-07	7.83519e-08	PTK2B/MMP2/COL1A1/PDGFRB/MYC/TNF/FZD4/WNT7B/FZD7/TEAD2/WNT6/SOX9	12
BP	GO:0061041	regulation of wound healing	13/233	133/18800	1.11837e-08	1.66039e-07	8.12293e-08	PTK2/TNFAIP3/UBASH3B/PDGFRA/THBS1/ITGB1/TNF/WNT4/SERPINE1/SMAD3/SERPINF2/ADAMTS18/HBEGF	13
BP	GO:0032330	regulation of chondrocyte differentiation	9/233	51/18800	1.14392e-08	1.68031e-07	8.22039e-08	LTBP3/GREM1/SNAI2/SMAD3/AXIN2/BMP4/CTNNB1/SOX9/ADAMTS7	9
BP	GO:0045778	positive regulation of ossification	9/233	51/18800	1.14392e-08	1.68031e-07	8.22039e-08	TGFB1/PTN/TGFB3/TMEM119/TGFB2/WNT4/SMAD3/BMPR1A/BMP4	9
BP	GO:0060688	regulation of morphogenesis of a branching structure	9/233	51/18800	1.14392e-08	1.68031e-07	8.22039e-08	SFRP1/GREM1/FGF7/TNF/SNAI2/BMP4/CTNNB1/SULF1/SOX9	9
BP	GO:1901652	response to peptide	24/233	491/18800	1.14985e-08	1.68307e-07	8.23391e-08	PTK2/TIMP1/PDK4/TNFAIP3/MMP2/TP53/SHC1/SOCS2/TSC2/COL1A1/ITGA4/JAK3/MYC/PRKAA1/IGF1R/MAX/STAT6/TNF/FYN/SOCS3/ID1/MMP9/LRP1/PRKCB	24
BP	GO:0001654	eye development	21/233	379/18800	1.15967e-08	1.69149e-07	8.2751e-08	MITF/EPHA2/BAX/PDGFRA/COL4A1/GNB1/PDGFRB/TGFB2/MAX/NF2/SMAD3/FZD4/WNT7B/TGFBR2/BMP4/WNT6/DLG1/CTNNB1/ADAMTS18/SOX9/SH3PXD2B	21
BP	GO:0050866	negative regulation of cell activation	16/233	216/18800	1.25349e-08	1.82194e-07	8.9133e-08	TNFAIP3/INPP5D/SFRP1/RUNX1/UBASH3B/AXL/SOCS5/PDGFRA/JAK3/IL2RA/PTPRC/BMP4/ID2/DLG1/FOXF1/ADAMTS18	16
BP	GO:0001656	metanephros development	11/233	89/18800	1.30746e-08	1.89377e-07	9.26471e-08	GREM1/PDGFRA/PDGFRB/MYC/AKR1B1/WWTR1/WNT4/WNT7B/BMP4/CTNNB1/SOX9	11
BP	GO:0031099	regeneration	15/233	188/18800	1.33404e-08	1.92556e-07	9.42019e-08	PTN/MMP2/RUNX1/AXL/SPP1/ANGPT2/CDKN1A/MYC/IGF1R/TNF/INPP5F/FZD7/TGFBR2/CCND1/GAS6	15
BP	GO:0070169	positive regulation of biomineral tissue development	9/233	52/18800	1.36854e-08	1.96852e-07	9.6304e-08	TGFB1/PTN/TGFB3/TMEM119/WNT4/SMAD3/BMPR1A/BMP4/WNT6	9
BP	GO:0150063	visual system development	21/233	383/18800	1.39223e-08	1.99568e-07	9.76327e-08	MITF/EPHA2/BAX/PDGFRA/COL4A1/GNB1/PDGFRB/TGFB2/MAX/NF2/SMAD3/FZD4/WNT7B/TGFBR2/BMP4/WNT6/DLG1/CTNNB1/ADAMTS18/SOX9/SH3PXD2B	21
BP	GO:0090218	positive regulation of lipid kinase activity	8/233	37/18800	1.39817e-08	1.99731e-07	9.77123e-08	CDC42/PTK2/TGFB1/PTK2B/PDGFRA/CD19/KIT/PDGFRB	8
BP	GO:0042698	ovulation cycle	10/233	70/18800	1.45935e-08	2.07049e-07	1.01292e-07	PTN/TGFB3/MMP2/AXL/PDGFRA/IGF1R/TGFB2/FZD4/MMP19/PTX3	10
BP	GO:1904888	cranial skeletal system development	10/233	70/18800	1.45935e-08	2.07049e-07	1.01292e-07	MMP14/TGFB3/PDGFRA/TGFB2/SMAD3/TGFBR2/BMP4/SMAD2/CTNNB1/MMP16	10
BP	GO:0042475	odontogenesis of dentin-containing tooth	11/233	90/18800	1.47343e-08	2.0802e-07	1.01767e-07	BAX/PDGFRA/CSF1/LAMA5/NF2/LEF1/SERPINE1/BMPR1A/BMP4/WNT6/CTNNB1	11
BP	GO:0007548	sex differentiation	18/233	281/18800	1.47621e-08	2.0802e-07	1.01767e-07	MMP14/MMP2/SFRP1/AXL/BAX/PDGFRA/KIT/PDGFRB/MYC/TGFB2/WNT4/FZD4/BMPR1A/CCND1/CTNNB1/MMP19/PTX3/SOX9	18
BP	GO:0060284	regulation of cell development	24/233	500/18800	1.62899e-08	2.27496e-07	1.11296e-07	CDC42/RAC3/TGFB1/PTN/TGM2/TP53/SPP1/LPAR3/FN1/VEGFC/BAD/KIT/MYC/TNF/NF2/AXIN2/BMPR1A/BMP4/ID2/FZD3/ID1/CTNNB1/FBLN1/TNFRSF1B	24
BP	GO:0060071	Wnt signaling pathway, planar cell polarity pathway	9/233	53/18800	1.63084e-08	2.27496e-07	1.11296e-07	CDC42/SFRP1/DVL3/FZD1/FZD7/FZD2/FZD3/DVL1/FZD6	9
BP	GO:0110151	NA	9/233	53/18800	1.63084e-08	2.27496e-07	1.11296e-07	TGFB1/PTN/TGFB3/TMEM119/WNT4/SMAD3/BMPR1A/BMP4/WNT6	9
BP	GO:0072080	nephron tubule development	11/233	91/18800	1.65792e-08	2.305e-07	1.12765e-07	GREM1/LAMA5/MYC/WWTR1/WNT4/WNT7B/BMP4/WNT6/DLG1/CTNNB1/SOX9	11
BP	GO:0042692	muscle cell differentiation	21/233	387/18800	1.66738e-08	2.31043e-07	1.13031e-07	MAPK12/MMP14/TGFB1/GREM1/TMEM119/PDGFRA/ITGB1/KIT/PDGFRB/WNT4/FZD7/SMAD1/BMPR1A/BMP4/ID2/CTNNB1/LOX/FOXF1/FLOT1/EFEMP2/SOX9	21
BP	GO:0032965	regulation of collagen biosynthetic process	8/233	38/18800	1.75221e-08	2.41992e-07	1.18387e-07	TGFB1/TGFB3/RUNX1/ITGA2/PDGFRB/WNT4/BMP4/SERPINF2	8
BP	GO:0048880	sensory system development	21/233	389/18800	1.82309e-08	2.50421e-07	1.22511e-07	MITF/EPHA2/BAX/PDGFRA/COL4A1/GNB1/PDGFRB/TGFB2/MAX/NF2/SMAD3/FZD4/WNT7B/TGFBR2/BMP4/WNT6/DLG1/CTNNB1/ADAMTS18/SOX9/SH3PXD2B	21
BP	GO:0052548	regulation of endopeptidase activity	22/233	426/18800	1.82529e-08	2.50421e-07	1.22511e-07	RAF1/TIMP1/NOL3/BAX/COL6A3/THBS1/BAD/EFNA1/MYC/RPS6KA3/TNF/FYN/SERPINE1/SMAD3/BIRC5/BBC3/MMP9/SERPINF2/GAS6/PAPLN/ANXA2/FURIN	22
BP	GO:1903035	negative regulation of response to wounding	11/233	92/18800	1.86272e-08	2.54715e-07	1.24612e-07	UBASH3B/SPP1/PDGFRA/THBS1/TNF/INPP5F/WNT4/SERPINE1/SMAD3/SERPINF2/ADAMTS18	11
BP	GO:0032970	regulation of actin filament-based process	21/233	393/18800	2.17569e-08	2.96536e-07	1.45071e-07	CDC42/RAC3/S1PR1/RAC2/PTK2B/TGFB3/SFRP1/PDGFRA/LPAR1/PDGFRB/HCLS1/WNT4/NF2/SMAD3/FRMD6/ID1/DLG1/PDPN/SERPINF2/FSCN1/LRP1	21
BP	GO:0050727	regulation of inflammatory response	21/233	394/18800	2.2732e-08	3.08814e-07	1.51078e-07	TNFAIP3/ADAM8/SOCS5/PIK3CG/ITGA2/PIK3AP1/IL2RA/OSMR/IL1R1/PTPRC/CCL5/TNF/FYN/NMI/SOCS3/SERPINE1/SMAD3/MMP9/FOXF1/TNFRSF1B/FURIN	21
BP	GO:0043393	regulation of protein binding	15/233	196/18800	2.33913e-08	3.16735e-07	1.54953e-07	CDC42/UBASH3B/BAX/ITGA4/CDKN1A/BMP4/ACTB/DVL1/ID1/TCF7L2/MMP9/LOX/FLOT1/LRP1/ANXA2	15
BP	GO:0006979	response to oxidative stress	22/233	433/18800	2.44228e-08	3.29629e-07	1.61261e-07	MAPK1/MMP14/PTK2B/TNFAIP3/MMP2/TP53/NOL3/AXL/FOS/PDGFRA/COL1A1/BAD/PDGFRB/PRKAA1/STAT6/TNF/FYN/FZD1/CTNNB1/MMP9/MPV17/FBLN5	22
BP	GO:0070242	thymocyte apoptotic process	6/233	16/18800	2.45311e-08	3.30018e-07	1.61451e-07	TP53/ADAM8/BAX/EFNA1/JAK3/BMP4	6
BP	GO:0055123	digestive system development	13/233	142/18800	2.47053e-08	3.31289e-07	1.62073e-07	TGFB3/SFRP1/PDGFRA/KIT/TGFB2/TNF/SMAD3/TGFBR2/BMP4/ID2/SMAD2/CTNNB1/FOXF1	13
BP	GO:1904019	epithelial cell apoptotic process	12/233	118/18800	2.65328e-08	3.54652e-07	1.73503e-07	TNFAIP3/PIK3CG/THBS1/ITGA4/BAD/PRKAA1/IGF1R/TNF/SERPINE1/TGFBR2/TCF7L2/GAS6	12
BP	GO:0051222	positive regulation of protein transport	18/233	293/18800	2.81252e-08	3.74732e-07	1.83326e-07	CDC42/TGFB1/RAC2/TGFB3/ADAM8/VEGFC/BAD/CHRM1/PRKAA1/TGFB2/HCLS1/TNF/FYN/ITGB2/SMAD3/TCF7L2/BBC3/GAS6	18
BP	GO:0031032	actomyosin structure organization	15/233	199/18800	2.8671e-08	3.80784e-07	1.86287e-07	CDC42/S1PR1/PTK2B/TGFB3/SFRP1/PDGFRA/LPAR1/ITGB1/PDGFRB/ARRB1/WNT4/NF2/SMAD3/FRMD6/SERPINF2	15
BP	GO:0030316	osteoclast differentiation	11/233	96/18800	2.92616e-08	3.8739e-07	1.89518e-07	MITF/GPR137B/INPP5D/SFRP1/EPHA2/UBASH3B/FOS/CSF1/TNF/CTNNB1/ANXA2	11
BP	GO:0010758	regulation of macrophage chemotaxis	7/233	27/18800	2.95131e-08	3.89479e-07	1.90541e-07	MAPK1/PTK2/PTK2B/THBS1/CSF1/CCL5/MMP28	7
BP	GO:0009314	response to radiation	22/233	438/18800	2.99579e-08	3.94099e-07	1.92801e-07	TIMP1/MMP2/TP53/SFRP1/BAX/FOS/ITGB1/ANGPT2/CDKN1A/KIT/MYC/PRKAA1/GADD45A/PTPRC/TNF/BCL3/SNAI2/ID2/CCND1/PPP1CB/MMP9/MFAP4	22
BP	GO:0010594	regulation of endothelial cell migration	16/233	230/18800	3.04334e-08	3.9909e-07	1.95243e-07	PTK2/TGFB1/PTN/PTK2B/EPHA2/FGFR1/PIK3CG/THBS1/ANGPT4/ANGPT2/VEGFC/EFNA1/PIK3CD/GADD45A/TNF/BMP4	16
BP	GO:0001658	branching involved in ureteric bud morphogenesis	9/233	57/18800	3.17131e-08	4.13264e-07	2.02177e-07	GREM1/LAMA5/MYC/WNT4/BMP4/WNT6/DLG1/CTNNB1/SOX9	9
BP	GO:0090175	regulation of establishment of planar polarity	9/233	57/18800	3.17131e-08	4.13264e-07	2.02177e-07	CDC42/SFRP1/DVL3/FZD1/FZD7/FZD2/FZD3/DVL1/FZD6	9
BP	GO:0043010	camera-type eye development	19/233	330/18800	3.23534e-08	4.20291e-07	2.05614e-07	MITF/EPHA2/BAX/PDGFRA/COL4A1/GNB1/PDGFRB/TGFB2/MAX/NF2/SMAD3/FZD4/WNT7B/TGFBR2/BMP4/WNT6/DLG1/CTNNB1/SOX9	19
BP	GO:2001237	negative regulation of extrinsic apoptotic signaling pathway	11/233	97/18800	3.26479e-08	4.22795e-07	2.06839e-07	RAF1/TNFAIP3/IL7/NOL3/THBS1/ITGA6/TNF/SNAI2/SERPINE1/BMP4/TCF7L2	11
BP	GO:0061333	renal tubule morphogenesis	10/233	76/18800	3.29078e-08	4.24837e-07	2.07839e-07	GREM1/COL4A1/LAMA5/MYC/WNT4/BMP4/WNT6/DLG1/CTNNB1/SOX9	10
BP	GO:0010463	mesenchymal cell proliferation	8/233	41/18800	3.31565e-08	4.25406e-07	2.08117e-07	FGF7/MYC/TGFBR2/BMPR1A/BMP4/CTNNB1/FOXF1/SOX9	8
BP	GO:1905521	regulation of macrophage migration	8/233	41/18800	3.31565e-08	4.25406e-07	2.08117e-07	MAPK1/PTK2/MMP14/PTK2B/THBS1/CSF1/CCL5/MMP28	8
BP	GO:0030178	negative regulation of Wnt signaling pathway	14/233	174/18800	3.69757e-08	4.72947e-07	2.31375e-07	SFRP1/GREM1/TSC2/AXIN1/WWTR1/SNAI2/FZD4/FZD1/AXIN2/TCF7L2/FZD6/CTNNB1/LRP1/SOX9	14
BP	GO:0072028	nephron morphogenesis	10/233	77/18800	3.74126e-08	4.76973e-07	2.33344e-07	GREM1/PDGFRB/LAMA5/MYC/WNT4/BMP4/WNT6/DLG1/CTNNB1/SOX9	10
BP	GO:0016202	regulation of striated muscle tissue development	6/233	17/18800	3.75199e-08	4.76973e-07	2.33344e-07	TGFB1/ERBB3/LEF1/SMAD3/BMP4/LOX	6
BP	GO:0048738	cardiac muscle tissue development	16/233	234/18800	3.87433e-08	4.91024e-07	2.40218e-07	CDC42/TGFB1/S1PR1/RUNX1/GREM1/PDGFRA/ITGB1/ERBB3/PDGFRB/TGFB2/FZD7/SMAD1/TGFBR2/BMPR1A/BMP4/ID2	16
BP	GO:0035265	organ growth	14/233	175/18800	3.9754e-08	5.0078e-07	2.44991e-07	S1PR1/RUNX1/IL7/PRLR/THBS3/FGF7/PDGFRB/TGFB2/SMAD1/TGFBR2/BMPR1A/SMAD2/COL27A1/SOX9	14
BP	GO:0043534	blood vessel endothelial cell migration	14/233	175/18800	3.9754e-08	5.0078e-07	2.44991e-07	TGFB1/PTK2B/GREM1/EPHA2/FGFR1/THBS1/ITGB1/ANGPT4/ANGPT2/VEGFC/EFNA1/GADD45A/TNF/ID1	14
BP	GO:0042098	T cell proliferation	15/233	204/18800	3.99247e-08	5.01411e-07	2.453e-07	RAC2/TP53/BAX/PIK3CG/JAK3/IL2RA/PTPRC/CCL5/FYN/WNT4/TGFBR2/BMP4/DLG1/CTNNB1/TNFRSF1B	15
BP	GO:0030501	positive regulation of bone mineralization	8/233	42/18800	4.05234e-08	5.07397e-07	2.48228e-07	TGFB1/PTN/TGFB3/TMEM119/WNT4/SMAD3/BMPR1A/BMP4	8
BP	GO:0090092	regulation of transmembrane receptor protein serine/threonine kinase signaling pathway	17/233	267/18800	4.11123e-08	5.13225e-07	2.5108e-07	TGFB1/TGFB3/TP53/SFRP1/GREM1/THBS1/TGFB2/AXIN1/SMAD3/FZD1/TGFBR2/BMPR1A/BMP4/SMAD2/LOX/SULF1/LRP1	17
BP	GO:0051251	positive regulation of lymphocyte activation	20/233	371/18800	4.13691e-08	5.14884e-07	2.51891e-07	MMP14/TGFB1/INPP5D/ADAM8/RUNX1/IL7/AXL/SOCS5/IL7R/CDKN1A/BAD/JAK3/IL2RA/STAT6/PTPRC/CCL5/FYN/LEF1/TGFBR2/GAS6	20
BP	GO:0001952	regulation of cell-matrix adhesion	12/233	123/18800	4.23605e-08	5.24085e-07	2.56392e-07	PTK2/MMP14/PTK2B/SFRP1/GREM1/THBS1/CSF1/WNT4/NF2/SERPINE1/SMAD3/EFEMP2	12
BP	GO:0032355	response to estradiol	12/233	123/18800	4.23605e-08	5.24085e-07	2.56392e-07	TGFB1/MMP2/SFRP1/SOCS2/COL1A1/ITGA2/BAD/PDGFRB/MYC/IGF1R/CCND1/CTNNB1	12
BP	GO:0010638	positive regulation of organelle organization	23/233	487/18800	4.43689e-08	5.47305e-07	2.67752e-07	MAPK1/CDC42/PTK2B/TGFB3/TP53/SFRP1/BAX/LPAR1/BAD/PDGFRB/HCLS1/TNF/WNT4/NF2/SMAD3/ID1/DLG1/BBC3/CTNNB1/MMP9/SERPINF2/FSCN1/ANXA2	23
BP	GO:0046660	female sex differentiation	12/233	124/18800	4.63911e-08	5.70556e-07	2.79127e-07	MMP14/MMP2/SFRP1/AXL/BAX/PDGFRA/KIT/MYC/WNT4/FZD4/MMP19/PTX3	12
BP	GO:0009410	response to xenobiotic stimulus	21/233	411/18800	4.68922e-08	5.75017e-07	2.81309e-07	PTK2B/MMP2/TP53/SFRP1/FOS/THBS1/COL1A1/ITGA2/VEGFC/BAD/MYC/PRKAA1/TGFB2/TNF/FZD1/TGFBR2/CCND1/FZD3/CTNNB1/LOX/GAS6	21
BP	GO:0048145	regulation of fibroblast proliferation	10/233	79/18800	4.80828e-08	5.87883e-07	2.87604e-07	TP53/SFRP1/BAX/PDGFRA/FN1/CDKN1A/PDGFRB/MYC/CTNNB1/GAS6	10
BP	GO:0071604	transforming growth factor beta production	8/233	43/18800	4.92576e-08	6.00481e-07	2.93767e-07	LTBP3/THBS1/FN1/TGFB2/SMAD3/BMPR1A/SERPINF2/FURIN	8
BP	GO:0019216	regulation of lipid metabolic process	19/233	339/18800	4.95875e-08	6.02735e-07	2.9487e-07	CDC42/PTK2/SPHK2/TGFB1/PDK4/PTK2B/PIK3CG/PDGFRA/CD19/GNB3/KIT/PDGFRB/PRKAA1/IGF1R/TNF/WNT4/SNAI2/ID2/SOX9	19
BP	GO:0010464	regulation of mesenchymal cell proliferation	7/233	29/18800	5.07883e-08	6.15531e-07	3.0113e-07	MYC/TGFBR2/BMPR1A/BMP4/CTNNB1/FOXF1/SOX9	7
BP	GO:0045580	regulation of T cell differentiation	13/233	151/18800	5.15422e-08	6.21046e-07	3.03827e-07	ADAM8/RUNX1/IL7/SOCS5/IL7R/BAD/JAK3/IL2RA/PTPRC/LEF1/TCF7/TGFBR2/BMP4	13
BP	GO:2000181	negative regulation of blood vessel morphogenesis	13/233	151/18800	5.15422e-08	6.21046e-07	3.03827e-07	EPHA2/THBS4/THBS1/ANGPT4/ANGPT2/THBS2/TGFB2/GADD45A/TNF/WNT4/SERPINE1/CTNNB1/SULF1	13
BP	GO:0051090	regulation of DNA-binding transcription factor activity	22/233	452/18800	5.22446e-08	6.2769e-07	3.07078e-07	TNFAIP3/ADAM8/GREM1/LPAR5/KIT/TRAF2/ARRB1/HCLS1/TNF/BCL3/SMAD3/FZD4/FZD1/FZD2/ID2/ID1/TCF7L2/FZD6/CTNNB1/FLOT1/GAS6/PRKCB	22
BP	GO:1902106	negative regulation of leukocyte differentiation	11/233	102/18800	5.5384e-08	6.63491e-07	3.24592e-07	GPR137B/INPP5D/SFRP1/RUNX1/UBASH3B/SOCS5/JAK3/MYC/BMP4/ID2/CTNNB1	11
BP	GO:1901343	negative regulation of vasculature development	13/233	152/18800	5.57509e-08	6.65966e-07	3.25804e-07	EPHA2/THBS4/THBS1/ANGPT4/ANGPT2/THBS2/TGFB2/GADD45A/TNF/WNT4/SERPINE1/CTNNB1/SULF1	13
BP	GO:0050863	regulation of T cell activation	19/233	342/18800	5.69911e-08	6.78831e-07	3.32097e-07	RAC2/ADAM8/RUNX1/IL7/SOCS5/IL7R/BAD/JAK3/IL2RA/PTPRC/CCL5/FYN/LEF1/TCF7/TGFBR2/BMP4/DLG1/CTNNB1/TNFRSF1B	19
BP	GO:0032233	positive regulation of actin filament bundle assembly	9/233	61/18800	5.85577e-08	6.95498e-07	3.40251e-07	CDC42/TGFB3/SFRP1/LPAR1/WNT4/NF2/SMAD3/ID1/SERPINF2	9
BP	GO:0045834	positive regulation of lipid metabolic process	13/233	153/18800	6.02664e-08	7.13753e-07	3.49182e-07	CDC42/PTK2/SPHK2/TGFB1/PTK2B/PDGFRA/CD19/KIT/PDGFRB/PRKAA1/IGF1R/TNF/WNT4	13
BP	GO:1904951	positive regulation of establishment of protein localization	18/233	309/18800	6.32223e-08	7.46634e-07	3.65268e-07	CDC42/TGFB1/RAC2/TGFB3/ADAM8/VEGFC/BAD/CHRM1/PRKAA1/TGFB2/HCLS1/TNF/FYN/ITGB2/SMAD3/TCF7L2/BBC3/GAS6	18
BP	GO:0021915	neural tube development	13/233	154/18800	6.51084e-08	7.6673e-07	3.75099e-07	TGFB1/SFRP1/EPHA2/TSC2/TGFB2/DVL3/FZD1/TEAD2/FZD2/BMP4/FZD3/DVL1/FZD6	13
BP	GO:0071621	granulocyte chemotaxis	12/233	128/18800	6.61717e-08	7.7705e-07	3.80148e-07	MAPK1/PTK2/RAC2/CSF3R/PIK3CG/THBS4/THBS1/CSF1/PIK3CD/TGFB2/CCL5/ITGB2	12
BP	GO:0042326	negative regulation of phosphorylation	20/233	382/18800	6.68087e-08	7.79303e-07	3.8125e-07	TGFB1/TNFAIP3/SFRP1/GREM1/UBASH3B/BAX/SOCS5/TSC2/CDKN1A/DUSP1/GADD45A/PTPRC/INPP5F/SOCS3/WWTR1/NF2/BMP4/DVL1/LRP1/FBLN1	20
BP	GO:0050878	regulation of body fluid levels	20/233	382/18800	6.68087e-08	7.79303e-07	3.8125e-07	UBASH3B/AXL/PRLR/SOCS2/PIK3CG/PDGFRA/THBS1/FN1/ITGA2/CHRM1/AKR1B1/SERPINE1/ACTB/CCND1/FZD6/PDPN/SERPINF2/GAS6/FBLN1/ADAMTS18	20
BP	GO:0060346	bone trabecula formation	5/233	10/18800	6.71134e-08	7.79303e-07	3.8125e-07	MMP2/SFRP1/GREM1/THBS3/COL1A1	5
BP	GO:0060439	trachea morphogenesis	5/233	10/18800	6.71134e-08	7.79303e-07	3.8125e-07	MAPK1/WNT7B/TGFBR2/BMP4/CTNNB1	5
BP	GO:0046427	positive regulation of JAK-STAT cascade	8/233	45/18800	7.16756e-08	8.29959e-07	4.06032e-07	PTK2B/PRLR/IL7R/KIT/CCL5/TNF/IL10RA/CRLF3	8
BP	GO:1903039	positive regulation of leukocyte cell-cell adhesion	16/233	245/18800	7.33763e-08	8.47292e-07	4.14512e-07	ADAM8/RUNX1/IL7/SOCS5/IL7R/ITGA4/BAD/JAK3/IL2RA/PTPRC/CCL5/TNF/FYN/ITGB2/LEF1/TGFBR2	16
BP	GO:0008585	female gonad development	11/233	105/18800	7.49724e-08	8.63325e-07	4.22355e-07	MMP14/MMP2/SFRP1/BAX/PDGFRA/KIT/MYC/WNT4/FZD4/MMP19/PTX3	11
BP	GO:0060675	ureteric bud morphogenesis	9/233	63/18800	7.82187e-08	8.98218e-07	4.39426e-07	GREM1/LAMA5/MYC/WNT4/BMP4/WNT6/DLG1/CTNNB1/SOX9	9
BP	GO:0001701	in utero embryonic development	20/233	387/18800	8.25874e-08	9.45035e-07	4.62329e-07	MAPK1/TGFB3/TP53/ELF3/PTH1R/PDGFRA/ITGB1/MYC/SOCS3/AXIN1/LEF1/SMAD3/WNT7B/TGFBR2/BMPR1A/SMAD2/CTNNB1/FKBP10/FOXF1/FURIN	20
BP	GO:1903707	negative regulation of hemopoiesis	11/233	106/18800	8.27502e-08	9.45035e-07	4.62329e-07	GPR137B/INPP5D/SFRP1/RUNX1/UBASH3B/SOCS5/JAK3/MYC/BMP4/ID2/CTNNB1	11
BP	GO:0018105	peptidyl-serine phosphorylation	18/233	315/18800	8.45145e-08	9.62539e-07	4.70893e-07	MAPK1/MAPK12/RAF1/TGFB1/BAX/PRKAA1/RPS6KA3/MAP4K1/HCLS1/GADD45A/TNF/INPP5F/MST1/AXIN1/CSNK1D/TGFBR2/GAS6/PRKCB	18
BP	GO:0048701	embryonic cranial skeleton morphogenesis	8/233	46/18800	8.58448e-08	9.72362e-07	4.75698e-07	MMP14/TGFB3/PDGFRA/SMAD3/TGFBR2/BMP4/SMAD2/MMP16	8
BP	GO:0061383	trabecula morphogenesis	8/233	46/18800	8.58448e-08	9.72362e-07	4.75698e-07	S1PR1/MMP2/SFRP1/GREM1/THBS3/COL1A1/TGFB2/BMPR1A	8
BP	GO:0051017	actin filament bundle assembly	13/233	158/18800	8.81735e-08	9.96025e-07	4.87275e-07	CDC42/S1PR1/PTK2B/TGFB3/SFRP1/LPAR1/ARRB1/WNT4/NF2/SMAD3/ID1/SERPINF2/FSCN1	13
BP	GO:0032956	regulation of actin cytoskeleton organization	19/233	352/18800	8.96351e-08	1.00894e-06	4.93594e-07	CDC42/RAC3/S1PR1/RAC2/PTK2B/TGFB3/SFRP1/PDGFRA/LPAR1/PDGFRB/HCLS1/WNT4/NF2/SMAD3/ID1/DLG1/SERPINF2/FSCN1/LRP1	19
BP	GO:0045670	regulation of osteoclast differentiation	9/233	64/18800	9.00451e-08	1.00894e-06	4.93594e-07	MITF/GPR137B/INPP5D/SFRP1/UBASH3B/FOS/CSF1/TNF/CTNNB1	9
BP	GO:0072171	mesonephric tubule morphogenesis	9/233	64/18800	9.00451e-08	1.00894e-06	4.93594e-07	GREM1/LAMA5/MYC/WNT4/BMP4/WNT6/DLG1/CTNNB1/SOX9	9
BP	GO:0030038	contractile actin filament bundle assembly	11/233	107/18800	9.12363e-08	1.01681e-06	4.97442e-07	CDC42/S1PR1/PTK2B/TGFB3/SFRP1/LPAR1/ARRB1/WNT4/NF2/SMAD3/SERPINF2	11
BP	GO:0043149	stress fiber assembly	11/233	107/18800	9.12363e-08	1.01681e-06	4.97442e-07	CDC42/S1PR1/PTK2B/TGFB3/SFRP1/LPAR1/ARRB1/WNT4/NF2/SMAD3/SERPINF2	11
BP	GO:0034599	cellular response to oxidative stress	17/233	284/18800	1.00611e-07	1.11829e-06	5.47089e-07	MAPK1/TNFAIP3/MMP2/TP53/NOL3/AXL/FOS/PDGFRA/PRKAA1/STAT6/TNF/FYN/FZD1/CTNNB1/MMP9/MPV17/FBLN5	17
BP	GO:0003197	endocardial cushion development	8/233	47/18800	1.02357e-07	1.13466e-06	5.55097e-07	ERBB3/TGFB2/SNAI2/TGFBR2/BMPR1A/BMP4/FOXF1/SOX9	8
BP	GO:0003170	heart valve development	9/233	65/18800	1.03399e-07	1.14317e-06	5.5926e-07	TGFB1/EFNA1/TGFB2/SNAI2/TGFBR2/BMPR1A/BMP4/TNFRSF1B/SOX9	9
BP	GO:0003338	metanephros morphogenesis	7/233	32/18800	1.06115e-07	1.17008e-06	5.72424e-07	GREM1/PDGFRB/WNT4/WNT7B/BMP4/CTNNB1/SOX9	7
BP	GO:0046545	development of primary female sexual characteristics	11/233	109/18800	1.10559e-07	1.21585e-06	5.94818e-07	MMP14/MMP2/SFRP1/BAX/PDGFRA/KIT/MYC/WNT4/FZD4/MMP19/PTX3	11
BP	GO:0007596	blood coagulation	15/233	221/18800	1.14794e-07	1.2591e-06	6.15974e-07	UBASH3B/AXL/PIK3CG/PDGFRA/THBS1/FN1/ITGA2/SERPINE1/ACTB/FZD6/PDPN/SERPINF2/GAS6/FBLN1/ADAMTS18	15
BP	GO:0030509	BMP signaling pathway	13/233	162/18800	1.18337e-07	1.28895e-06	6.30581e-07	TGFB1/TGFB3/SFRP1/GREM1/TGFB2/LEF1/SMAD3/FZD1/SMAD1/BMPR1A/BMP4/SMAD2/SULF1	13
BP	GO:0061572	actin filament bundle organization	13/233	162/18800	1.18337e-07	1.28895e-06	6.30581e-07	CDC42/S1PR1/PTK2B/TGFB3/SFRP1/LPAR1/ARRB1/WNT4/NF2/SMAD3/ID1/SERPINF2/FSCN1	13
BP	GO:0010812	negative regulation of cell-substrate adhesion	9/233	66/18800	1.18446e-07	1.28895e-06	6.30581e-07	MMP14/THBS1/COL1A1/ANGPT2/NF2/SERPINE1/FZD4/FZD7/FBLN1	9
BP	GO:0060324	face development	8/233	48/18800	1.21526e-07	1.31171e-06	6.41711e-07	MAPK1/RAF1/TGFB3/MMP2/PDGFRA/COL1A1/LEF1/CRISPLD2	8
BP	GO:0002551	mast cell chemotaxis	5/233	11/18800	1.21799e-07	1.31171e-06	6.41711e-07	RAC2/VEGFC/VEGFB/KIT/PIK3CD	5
BP	GO:0070243	regulation of thymocyte apoptotic process	5/233	11/18800	1.21799e-07	1.31171e-06	6.41711e-07	TP53/ADAM8/EFNA1/JAK3/BMP4	5
BP	GO:0090179	planar cell polarity pathway involved in neural tube closure	5/233	11/18800	1.21799e-07	1.31171e-06	6.41711e-07	SFRP1/DVL3/FZD1/FZD2/DVL1	5
BP	GO:1901216	positive regulation of neuron death	10/233	87/18800	1.22464e-07	1.31546e-06	6.43546e-07	CDC42/TP53/BAX/FOS/BAD/TGFB2/TNF/FYN/ITGB2/CTNNB1	10
BP	GO:0071214	cellular response to abiotic stimulus	18/233	323/18800	1.23131e-07	1.31582e-06	6.43724e-07	TIMP1/MMP2/TP53/SFRP1/BAX/COL1A1/ITGA2/CDKN1A/BAD/MYC/IGF1R/RELB/AKR1B1/GADD45A/SNAI2/MMP9/SOX9/MFAP4	18
BP	GO:0104004	cellular response to environmental stimulus	18/233	323/18800	1.23131e-07	1.31582e-06	6.43724e-07	TIMP1/MMP2/TP53/SFRP1/BAX/COL1A1/ITGA2/CDKN1A/BAD/MYC/IGF1R/RELB/AKR1B1/GADD45A/SNAI2/MMP9/SOX9/MFAP4	18
BP	GO:0001819	positive regulation of cytokine production	22/233	475/18800	1.24221e-07	1.32407e-06	6.47759e-07	SPHK2/TGFB1/ADAM8/RUNX1/IL7/PIK3CG/THBS1/KIT/PIK3CD/IL1R1/TRAF2/PTPRC/TNF/BCL3/SERPINE1/SMAD3/BMPR1A/SULF1/SERPINF2/FLOT1/SULF2/FURIN	22
BP	GO:1901653	cellular response to peptide	19/233	361/18800	1.32881e-07	1.40776e-06	6.88705e-07	PTK2/PDK4/TP53/SHC1/SOCS2/TSC2/ITGA4/JAK3/MYC/PRKAA1/IGF1R/MAX/STAT6/TNF/FYN/SOCS3/ID1/LRP1/PRKCB	19
BP	GO:2000146	negative regulation of cell motility	19/233	361/18800	1.32881e-07	1.40776e-06	6.88705e-07	TGFB1/TIMP1/MITF/SFRP1/GREM1/THBS1/ANGPT4/ANGPT2/DUSP1/GADD45A/TNF/WNT4/NF2/SERPINE1/BMPR1A/SULF1/LRP1/FBLN1/MMP28	19
BP	GO:0048333	mesodermal cell differentiation	7/233	33/18800	1.33271e-07	1.40776e-06	6.88705e-07	ITGB1/ITGB4/ITGA2/SMAD1/BMPR1A/BMP4/FOXF1	7
BP	GO:0072009	nephron epithelium development	11/233	111/18800	1.33428e-07	1.40776e-06	6.88705e-07	GREM1/LAMA5/MYC/WWTR1/WNT4/WNT7B/BMP4/WNT6/DLG1/CTNNB1/SOX9	11
BP	GO:0061564	axon development	22/233	479/18800	1.43598e-07	1.50846e-06	7.3797e-07	PTK2/PTN/RAC2/MMP2/EPHA2/SPP1/LAMA3/LPAR3/EFNA4/ITGB1/FN1/ITGA4/LAMC2/EFNA1/LAMA5/IGF1R/INPP5F/FYN/ACTB/FZD3/DVL1/FLOT1	22
BP	GO:0048546	digestive tract morphogenesis	8/233	49/18800	1.43698e-07	1.50846e-06	7.3797e-07	SFRP1/PDGFRA/SMAD3/BMP4/ID2/SMAD2/CTNNB1/FOXF1	8
BP	GO:0051781	positive regulation of cell division	10/233	89/18800	1.52325e-07	1.595e-06	7.80305e-07	CDC42/TGFB1/PTN/TGFB3/THBS4/FGF7/VEGFC/VEGFB/IGF1R/TGFB2	10
BP	GO:0008406	gonad development	15/233	226/18800	1.53701e-07	1.59734e-06	7.8145e-07	MMP14/MMP2/SFRP1/BAX/PDGFRA/KIT/PDGFRB/MYC/TGFB2/WNT4/FZD4/CCND1/MMP19/PTX3/SOX9	15
BP	GO:0009743	response to carbohydrate	15/233	226/18800	1.53701e-07	1.59734e-06	7.8145e-07	RAF1/PTK2B/COL6A2/THBS1/ITGA2/ANGPT2/BAD/MYC/PRKAA1/IGF1R/TGFBR2/SMAD2/TCF7L2/GAS6/PRKCB	15
BP	GO:0050817	coagulation	15/233	226/18800	1.53701e-07	1.59734e-06	7.8145e-07	UBASH3B/AXL/PIK3CG/PDGFRA/THBS1/FN1/ITGA2/SERPINE1/ACTB/FZD6/PDPN/SERPINF2/GAS6/FBLN1/ADAMTS18	15
BP	GO:0044344	cellular response to fibroblast growth factor stimulus	11/233	113/18800	1.60396e-07	1.66276e-06	8.13455e-07	SFRP1/FGFR1/THBS1/COL1A1/FGF7/MYC/CCL5/WNT4/CTNNB1/SULF1/SULF2	11
BP	GO:0007599	hemostasis	15/233	227/18800	1.62786e-07	1.68333e-06	8.23519e-07	UBASH3B/AXL/PIK3CG/PDGFRA/THBS1/FN1/ITGA2/SERPINE1/ACTB/FZD6/PDPN/SERPINF2/GAS6/FBLN1/ADAMTS18	15
BP	GO:0070232	regulation of T cell apoptotic process	7/233	34/18800	1.66063e-07	1.71296e-06	8.38014e-07	TP53/ADAM8/IL7R/EFNA1/JAK3/CCL5/BMP4	7
BP	GO:2000107	negative regulation of leukocyte apoptotic process	8/233	50/18800	1.69255e-07	1.73574e-06	8.49158e-07	AXL/IL7R/EFNA1/JAK3/HCLS1/CCL5/BMP4/GAS6	8
BP	GO:0030901	midbrain development	10/233	90/18800	1.69524e-07	1.73574e-06	8.49158e-07	CDC42/SFRP1/CSNK1D/FZD1/SMAD1/ACTB/FZD3/YWHAQ/FZD6/CTNNB1	10
BP	GO:0061097	regulation of protein tyrosine kinase activity	10/233	90/18800	1.69524e-07	1.73574e-06	8.49158e-07	GREM1/SHC1/SOCS5/ERBB3/EFNA1/PTPRC/CCL5/DLG4/GAS6/HBEGF	10
BP	GO:0010466	negative regulation of peptidase activity	16/233	262/18800	1.842e-07	1.88137e-06	9.20404e-07	RAF1/TIMP1/NOL3/COL6A3/THBS1/RPS6KA3/TNF/SERPINE1/BIRC5/MMP9/SERPINF2/GAS6/LRP1/PAPLN/ANXA2/FURIN	16
BP	GO:0051271	negative regulation of cellular component movement	19/233	369/18800	1.86596e-07	1.90118e-06	9.30093e-07	TGFB1/TIMP1/MITF/SFRP1/GREM1/THBS1/ANGPT4/ANGPT2/DUSP1/GADD45A/TNF/WNT4/NF2/SERPINE1/BMPR1A/SULF1/LRP1/FBLN1/MMP28	19
BP	GO:0010720	positive regulation of cell development	17/233	297/18800	1.90868e-07	1.93995e-06	9.4906e-07	CDC42/RAC3/TGFB1/PTN/TGM2/LPAR3/FN1/VEGFC/BAD/KIT/MYC/TNF/BMP4/ID2/FZD3/CTNNB1/TNFRSF1B	17
BP	GO:2001234	negative regulation of apoptotic signaling pathway	15/233	230/18800	1.93032e-07	1.95716e-06	9.57479e-07	RAF1/TNFAIP3/IL7/NOL3/BAX/THBS1/ITGA6/TNF/WNT4/SNAI2/SERPINE1/BMP4/TCF7L2/CTNNB1/MMP9	15
BP	GO:0051496	positive regulation of stress fiber assembly	8/233	51/18800	1.98616e-07	2.00888e-06	9.8278e-07	CDC42/TGFB3/SFRP1/LPAR1/WNT4/NF2/SMAD3/SERPINF2	8
BP	GO:0051346	negative regulation of hydrolase activity	19/233	371/18800	2.02824e-07	2.04645e-06	1.00116e-06	SPHK2/RAF1/TIMP1/NOL3/COL6A3/THBS1/RPS6KA3/TGFB2/TNF/SERPINE1/BIRC5/MMP9/SERPINF2/GAS6/LRP1/PTX3/PAPLN/ANXA2/FURIN	19
BP	GO:0045137	development of primary sexual characteristics	15/233	231/18800	2.04191e-07	2.05526e-06	1.00547e-06	MMP14/MMP2/SFRP1/BAX/PDGFRA/KIT/PDGFRB/MYC/TGFB2/WNT4/FZD4/CCND1/MMP19/PTX3/SOX9	15
BP	GO:0072497	mesenchymal stem cell differentiation	5/233	12/18800	2.06691e-07	2.06541e-06	1.01044e-06	LTBP3/PDGFRA/FZD1/CTNNB1/SOX9	5
BP	GO:0090178	regulation of establishment of planar polarity involved in neural tube closure	5/233	12/18800	2.06691e-07	2.06541e-06	1.01044e-06	SFRP1/DVL3/FZD1/FZD2/DVL1	5
BP	GO:0097531	mast cell migration	5/233	12/18800	2.06691e-07	2.06541e-06	1.01044e-06	RAC2/VEGFC/VEGFB/KIT/PIK3CD	5
BP	GO:0032147	activation of protein kinase activity	12/233	142/18800	2.08372e-07	2.07226e-06	1.01379e-06	PTK2B/GREM1/PRLR/ANGPT4/TRAF2/TGFB2/CCL5/AXIN1/TGFBR2/DLG1/MOB1B/GAS6	12
BP	GO:0090090	negative regulation of canonical Wnt signaling pathway	12/233	142/18800	2.08372e-07	2.07226e-06	1.01379e-06	SFRP1/GREM1/AXIN1/WWTR1/SNAI2/FZD4/FZD1/AXIN2/TCF7L2/FZD6/CTNNB1/SOX9	12
BP	GO:0048634	regulation of muscle organ development	6/233	22/18800	2.14758e-07	2.13066e-06	1.04236e-06	TGFB1/ERBB3/LEF1/SMAD3/BMP4/LOX	6
BP	GO:2000379	positive regulation of reactive oxygen species metabolic process	9/233	71/18800	2.25854e-07	2.23542e-06	1.09361e-06	TGFB1/PTK2B/TP53/THBS1/CDKN1A/PDGFRB/GADD45A/ITGB2/TGFBR2	9
BP	GO:0018209	peptidyl-serine modification	18/233	338/18800	2.41739e-07	2.38696e-06	1.16775e-06	MAPK1/MAPK12/RAF1/TGFB1/BAX/PRKAA1/RPS6KA3/MAP4K1/HCLS1/GADD45A/TNF/INPP5F/MST1/AXIN1/CSNK1D/TGFBR2/GAS6/PRKCB	18
BP	GO:0044089	positive regulation of cellular component biogenesis	22/233	494/18800	2.43835e-07	2.40195e-06	1.17508e-06	CDC42/TGFB1/RAC2/PTK2B/TGFB3/TP53/SFRP1/EPHA2/BAX/LPAR1/KIT/THBS2/TNF/WNT4/NF2/SMAD3/ID1/DLG1/SERPINF2/FLOT1/FSCN1/SOX9	22
BP	GO:0051223	regulation of protein transport	22/233	495/18800	2.52402e-07	2.47485e-06	1.21074e-06	CDC42/TGFB1/RAC2/TGFB3/ADAM8/SFRP1/SYT7/VEGFC/BAD/CHRM1/PRKAA1/TGFB2/HCLS1/CCL5/TNF/FYN/ITGB2/SMAD3/BMP4/TCF7L2/BBC3/GAS6	22
BP	GO:0001558	regulation of cell growth	20/233	415/18800	2.54356e-07	2.47485e-06	1.21074e-06	CDC42/SPHK2/MMP14/TGFB1/PTK2B/TP53/SFRP1/GREM1/SOCS2/SPP1/LPAR3/FN1/CDKN1A/RPS6KA3/TGFB2/CRLF3/SMAD3/TEAD1/FBLN5/HBEGF	20
BP	GO:0001736	establishment of planar polarity	9/233	72/18800	2.55361e-07	2.47485e-06	1.21074e-06	CDC42/SFRP1/DVL3/FZD1/FZD7/FZD2/FZD3/DVL1/FZD6	9
BP	GO:0007164	establishment of tissue polarity	9/233	72/18800	2.55361e-07	2.47485e-06	1.21074e-06	CDC42/SFRP1/DVL3/FZD1/FZD7/FZD2/FZD3/DVL1/FZD6	9
BP	GO:0072078	nephron tubule morphogenesis	9/233	72/18800	2.55361e-07	2.47485e-06	1.21074e-06	GREM1/LAMA5/MYC/WNT4/BMP4/WNT6/DLG1/CTNNB1/SOX9	9
BP	GO:0045582	positive regulation of T cell differentiation	10/233	94/18800	2.56594e-07	2.47485e-06	1.21074e-06	ADAM8/RUNX1/IL7/SOCS5/IL7R/BAD/IL2RA/PTPRC/LEF1/TGFBR2	10
BP	GO:0048704	embryonic skeletal system morphogenesis	10/233	94/18800	2.56594e-07	2.47485e-06	1.21074e-06	MMP14/TGFB3/PDGFRA/SMAD3/TGFBR2/BMP4/SMAD2/DLG1/CTNNB1/MMP16	10
BP	GO:1901655	cellular response to ketone	10/233	94/18800	2.56594e-07	2.47485e-06	1.21074e-06	SPHK2/SFRP1/SPP1/GNB1/GNG2/MYC/PRKAA1/IGF1R/MAP4K1/GAS6	10
BP	GO:1904035	regulation of epithelial cell apoptotic process	10/233	94/18800	2.56594e-07	2.47485e-06	1.21074e-06	TNFAIP3/THBS1/ITGA4/BAD/PRKAA1/IGF1R/TNF/SERPINE1/TCF7L2/GAS6	10
BP	GO:0071774	response to fibroblast growth factor	11/233	119/18800	2.72535e-07	2.62252e-06	1.28299e-06	SFRP1/FGFR1/THBS1/COL1A1/FGF7/MYC/CCL5/WNT4/CTNNB1/SULF1/SULF2	11
BP	GO:0031346	positive regulation of cell projection organization	18/233	341/18800	2.7539e-07	2.64387e-06	1.29343e-06	CDC42/PTN/RAC2/PTK2B/TGFB3/LPAR3/ITGA6/FN1/ITGA2/KIT/IGF1R/FYN/FZD4/DVL3/FZD1/DLG4/DVL1/FSCN1	18
BP	GO:0022604	regulation of cell morphogenesis	17/233	305/18800	2.78189e-07	2.66459e-06	1.30357e-06	CDC42/PTK2/RAC3/RAC2/PTK2B/LPAR1/FN1/KIT/FYN/ITGB2/FZD4/DVL3/DLG4/DVL1/DLG1/PDPN/FBLN1	17
BP	GO:0045216	cell-cell junction organization	14/233	205/18800	2.84268e-07	2.71655e-06	1.32899e-06	CDC42/TGFB1/TGFB3/EPHA2/TGFB2/TNF/NF2/SNAI2/SMAD3/ACTB/PATJ/DLG1/CTNNB1/FSCN1	14
BP	GO:0002053	positive regulation of mesenchymal cell proliferation	6/233	23/18800	2.87555e-07	2.74166e-06	1.34127e-06	MYC/TGFBR2/BMPR1A/CTNNB1/FOXF1/SOX9	6
BP	GO:0007254	JNK cascade	13/233	175/18800	2.90854e-07	2.76677e-06	1.35356e-06	CDC42/PTK2B/SFRP1/IGF1R/TRAF2/MAP4K1/GADD45A/TNF/AXIN1/SMAD3/WNT7B/FZD7/SERPINF2	13
BP	GO:1902905	positive regulation of supramolecular fiber organization	13/233	176/18800	3.10643e-07	2.94827e-06	1.44235e-06	CDC42/PTK2B/TGFB3/SFRP1/TNXB/LPAR1/WNT4/NF2/SMAD3/ID1/DLG1/SERPINF2/EFEMP2	13
BP	GO:1903037	regulation of leukocyte cell-cell adhesion	18/233	344/18800	3.13265e-07	2.96638e-06	1.45121e-06	ADAM8/RUNX1/IL7/SOCS5/IL7R/ITGA4/BAD/JAK3/IL2RA/PTPRC/CCL5/TNF/FYN/ITGB2/LEF1/TGFBR2/BMP4/DLG1	18
BP	GO:0072088	nephron epithelium morphogenesis	9/233	74/18800	3.24555e-07	3.0663e-06	1.50009e-06	GREM1/LAMA5/MYC/WNT4/BMP4/WNT6/DLG1/CTNNB1/SOX9	9
BP	GO:0061430	bone trabecula morphogenesis	5/233	13/18800	3.32483e-07	3.12699e-06	1.52978e-06	MMP2/SFRP1/GREM1/THBS3/COL1A1	5
BP	GO:0090177	establishment of planar polarity involved in neural tube closure	5/233	13/18800	3.32483e-07	3.12699e-06	1.52978e-06	SFRP1/DVL3/FZD1/FZD2/DVL1	5
BP	GO:0030336	negative regulation of cell migration	18/233	346/18800	3.41093e-07	3.20073e-06	1.56586e-06	TGFB1/TIMP1/MITF/SFRP1/GREM1/THBS1/ANGPT4/ANGPT2/DUSP1/GADD45A/TNF/WNT4/NF2/SERPINE1/BMPR1A/SULF1/LRP1/MMP28	18
BP	GO:0006909	phagocytosis	17/233	310/18800	3.49826e-07	3.27528e-06	1.60233e-06	CDC42/PTK2/RAC2/TGM2/SYT7/AXL/THBS1/ITGB1/ITGA2/IL2RG/PTPRC/TNF/FYN/ITGB2/GAS6/LRP1/PTX3	17
BP	GO:0010811	positive regulation of cell-substrate adhesion	11/233	122/18800	3.51134e-07	3.28014e-06	1.60471e-06	CDC42/RAC3/PTK2B/SFRP1/FN1/CSF1/ITGA5/WNT4/SMAD3/FOXF1/EFEMP2	11
BP	GO:0016525	negative regulation of angiogenesis	12/233	149/18800	3.52001e-07	3.28087e-06	1.60506e-06	EPHA2/THBS4/THBS1/ANGPT4/ANGPT2/THBS2/TGFB2/GADD45A/TNF/SERPINE1/CTNNB1/SULF1	12
BP	GO:0002763	positive regulation of myeloid leukocyte differentiation	8/233	55/18800	3.63931e-07	3.3694e-06	1.64838e-06	TGFB1/RUNX1/FOS/CSF1/HCLS1/TNF/LEF1/ID2	8
BP	GO:0003179	heart valve morphogenesis	8/233	55/18800	3.63931e-07	3.3694e-06	1.64838e-06	TGFB1/EFNA1/TGFB2/SNAI2/TGFBR2/BMPR1A/BMP4/SOX9	8
BP	GO:1905517	macrophage migration	8/233	55/18800	3.63931e-07	3.3694e-06	1.64838e-06	MAPK1/PTK2/MMP14/PTK2B/THBS1/CSF1/CCL5/MMP28	8
BP	GO:0070227	lymphocyte apoptotic process	9/233	75/18800	3.64873e-07	3.37061e-06	1.64897e-06	TP53/ADAM8/BAX/IL7R/EFNA1/JAK3/IL2RA/CCL5/BMP4	9
BP	GO:0070372	regulation of ERK1 and ERK2 cascade	17/233	311/18800	3.66024e-07	3.37375e-06	1.6505e-06	TGFB1/PTK2B/EPHA2/SHC1/PDGFRA/FN1/PDGFRB/ARRB1/PTPRC/CCL5/TNF/YWHAZ/BMP4/DLG1/SERPINF2/GAS6/FBLN1	17
BP	GO:0048246	macrophage chemotaxis	7/233	38/18800	3.73491e-07	3.43496e-06	1.68045e-06	MAPK1/PTK2/PTK2B/THBS1/CSF1/CCL5/MMP28	7
BP	GO:0002718	regulation of cytokine production involved in immune response	10/233	98/18800	3.80675e-07	3.4933e-06	1.70899e-06	SPHK2/TGFB1/TGFB3/KIT/JAK3/IL1R1/TRAF2/TGFB2/TNF/TNFRSF1B	10
BP	GO:0045861	negative regulation of proteolysis	18/233	350/18800	4.03621e-07	3.69571e-06	1.80801e-06	RAF1/TIMP1/TP53/NOL3/COL6A3/THBS1/EFNA1/RPS6KA3/TNF/SERPINE1/BIRC5/MMP9/SERPINF2/GAS6/LRP1/PAPLN/ANXA2/FURIN	18
BP	GO:0061045	negative regulation of wound healing	9/233	76/18800	4.09465e-07	3.74098e-06	1.83016e-06	UBASH3B/PDGFRA/THBS1/TNF/WNT4/SERPINE1/SMAD3/SERPINF2/ADAMTS18	9
BP	GO:0031668	cellular response to extracellular stimulus	15/233	245/18800	4.35112e-07	3.96658e-06	1.94053e-06	MAPK1/PDK4/TP53/SFRP1/AXL/FOS/COL1A1/ITGA4/CDKN1A/PRKAA1/MAX/PTPRC/WNT4/SNAI2/GAS6	15
BP	GO:0032570	response to progesterone	7/233	39/18800	4.50421e-07	4.08821e-06	2.00003e-06	TGFB1/TGFB3/FOS/THBS1/BAD/IGF1R/TGFB2	7
BP	GO:0071634	regulation of transforming growth factor beta production	7/233	39/18800	4.50421e-07	4.08821e-06	2.00003e-06	THBS1/FN1/TGFB2/SMAD3/BMPR1A/SERPINF2/FURIN	7
BP	GO:0002367	cytokine production involved in immune response	10/233	100/18800	4.60443e-07	4.17007e-06	2.04008e-06	SPHK2/TGFB1/TGFB3/KIT/JAK3/IL1R1/TRAF2/TGFB2/TNF/TNFRSF1B	10
BP	GO:0051147	regulation of muscle cell differentiation	12/233	153/18800	4.68816e-07	4.23667e-06	2.07266e-06	MAPK12/MMP14/TGFB1/GREM1/TMEM119/KIT/FZD7/SMAD1/BMPR1A/BMP4/ID2/EFEMP2	12
BP	GO:0007566	embryo implantation	8/233	57/18800	4.83495e-07	4.35041e-06	2.1283e-06	TIMP1/MMP2/PRLR/SPP1/ITGB4/TGFBR2/MMP9/FBLN1	8
BP	GO:0070228	regulation of lymphocyte apoptotic process	8/233	57/18800	4.83495e-07	4.35041e-06	2.1283e-06	TP53/ADAM8/BAX/IL7R/EFNA1/JAK3/CCL5/BMP4	8
BP	GO:0006929	substrate-dependent cell migration	6/233	25/18800	4.94122e-07	4.41735e-06	2.16105e-06	ADAM8/FN1/ITGA2/VEGFC/PTPRC/SNAI2	6
BP	GO:0072273	metanephric nephron morphogenesis	6/233	25/18800	4.94122e-07	4.41735e-06	2.16105e-06	GREM1/PDGFRB/WNT4/BMP4/CTNNB1/SOX9	6
BP	GO:1905523	positive regulation of macrophage migration	6/233	25/18800	4.94122e-07	4.41735e-06	2.16105e-06	MAPK1/PTK2/MMP14/THBS1/CSF1/CCL5	6
BP	GO:0048872	homeostasis of number of cells	16/233	282/18800	4.96641e-07	4.43033e-06	2.1674e-06	RAC3/TNFAIP3/INPP5D/IL7/AXL/BAX/IL7R/CSF1/KIT/JAK3/IL2RA/PIK3CD/HCLS1/BMP4/ID2/SOX9	16
BP	GO:0072210	metanephric nephron development	7/233	40/18800	5.40243e-07	4.80897e-06	2.35264e-06	GREM1/PDGFRA/PDGFRB/WNT4/BMP4/CTNNB1/SOX9	7
BP	GO:0040013	negative regulation of locomotion	19/233	396/18800	5.48766e-07	4.8744e-06	2.38465e-06	TGFB1/TIMP1/MITF/SFRP1/GREM1/THBS1/ANGPT4/ANGPT2/DUSP1/GADD45A/TNF/WNT4/NF2/SERPINE1/BMPR1A/SULF1/LRP1/FBLN1/MMP28	19
BP	GO:0090316	positive regulation of intracellular protein transport	12/233	156/18800	5.77852e-07	5.12181e-06	2.50569e-06	CDC42/TGFB1/RAC2/CHRM1/PRKAA1/HCLS1/FYN/ITGB2/SMAD3/TCF7L2/BBC3/GAS6	12
BP	GO:0010951	negative regulation of endopeptidase activity	15/233	251/18800	5.92032e-07	5.23633e-06	2.56171e-06	RAF1/TIMP1/NOL3/COL6A3/THBS1/RPS6KA3/TNF/SERPINE1/BIRC5/MMP9/SERPINF2/GAS6/PAPLN/ANXA2/FURIN	15
BP	GO:0009991	response to extracellular stimulus	21/233	479/18800	5.98308e-07	5.28061e-06	2.58337e-06	MAPK1/PDK4/TP53/SFRP1/AXL/FOS/SPP1/COL1A1/ITGA2/ITGA4/CDKN1A/PRKAA1/IGF1R/MAX/PTPRC/TNF/WNT4/SNAI2/TGFBR2/CCND1/GAS6	21
BP	GO:0050767	regulation of neurogenesis	18/233	361/18800	6.33195e-07	5.56365e-06	2.72184e-06	TGFB1/PTN/TGM2/TP53/SPP1/LPAR3/FN1/VEGFC/KIT/MYC/TNF/NF2/BMPR1A/ID2/FZD3/ID1/CTNNB1/TNFRSF1B	18
BP	GO:0007163	establishment or maintenance of cell polarity	14/233	219/18800	6.33634e-07	5.56365e-06	2.72184e-06	CDC42/PTK2/RAC3/RAC2/PTK2B/ITGB1/IGF1R/WNT7B/FBXW11/ACTB/PATJ/DLG1/FOXF1/FSCN1	14
BP	GO:0033598	mammary gland epithelial cell proliferation	6/233	26/18800	6.35731e-07	5.56365e-06	2.72184e-06	MAPK1/EPHA2/BAX/STAT6/ID2/CCND1	6
BP	GO:0050926	regulation of positive chemotaxis	6/233	26/18800	6.35731e-07	5.56365e-06	2.72184e-06	S1PR1/ITGA2/ANGPT2/VEGFC/VEGFB/SMAD3	6
BP	GO:0001570	vasculogenesis	9/233	80/18800	6.38491e-07	5.57607e-06	2.72792e-06	TGFB1/EPHA2/PDGFRB/FZD4/WNT7B/TEAD2/TGFBR2/CTNNB1/FOXF1	9
BP	GO:0051960	regulation of nervous system development	20/233	440/18800	6.40209e-07	5.57935e-06	2.72952e-06	TGFB1/PTN/TGM2/TP53/SPP1/LPAR3/FN1/VEGFC/KIT/THBS2/MYC/TNF/NF2/BMPR1A/ID2/FZD3/ID1/DLG1/CTNNB1/TNFRSF1B	20
BP	GO:1905314	semi-lunar valve development	7/233	41/18800	6.44643e-07	5.60624e-06	2.74268e-06	TGFB1/EFNA1/TGFB2/SNAI2/BMP4/TNFRSF1B/SOX9	7
BP	GO:0043506	regulation of JUN kinase activity	8/233	60/18800	7.25111e-07	6.29287e-06	3.07859e-06	PTK2B/SFRP1/TNXB/TRAF2/TNF/AXIN1/FZD4/DVL3	8
BP	GO:0010755	regulation of plasminogen activation	5/233	15/18800	7.6022e-07	6.58382e-06	3.22093e-06	RUNX1/THBS1/SERPINE1/SERPINF2/ANXA2	5
BP	GO:0032874	positive regulation of stress-activated MAPK cascade	11/233	132/18800	7.77021e-07	6.71534e-06	3.28527e-06	CDC42/PTK2B/TRAF2/TGFB2/GADD45A/TNF/AXIN1/WNT7B/FZD7/BMP4/SERPINF2	11
BP	GO:0032231	regulation of actin filament bundle assembly	10/233	106/18800	7.94133e-07	6.84898e-06	3.35065e-06	CDC42/S1PR1/TGFB3/SFRP1/LPAR1/WNT4/NF2/SMAD3/ID1/SERPINF2	10
BP	GO:0034113	heterotypic cell-cell adhesion	8/233	61/18800	8.25722e-07	7.10668e-06	3.47673e-06	ITGB1/ITGA4/ITGA5/ITGB7/PTPRC/TNF/ITGB2/FLOT1	8
BP	GO:0048041	focal adhesion assembly	9/233	83/18800	8.76317e-07	7.52655e-06	3.68213e-06	PTK2/MMP14/PTK2B/SFRP1/GREM1/THBS1/ITGA2/WNT4/SMAD3	9
BP	GO:0002695	negative regulation of leukocyte activation	13/233	193/18800	8.91427e-07	7.64054e-06	3.7379e-06	TNFAIP3/INPP5D/SFRP1/RUNX1/AXL/SOCS5/JAK3/IL2RA/PTPRC/BMP4/ID2/DLG1/FOXF1	13
BP	GO:0070304	positive regulation of stress-activated protein kinase signaling cascade	11/233	134/18800	9.0304e-07	7.70829e-06	3.77104e-06	CDC42/PTK2B/TRAF2/TGFB2/GADD45A/TNF/AXIN1/WNT7B/FZD7/BMP4/SERPINF2	11
BP	GO:2001235	positive regulation of apoptotic signaling pathway	11/233	134/18800	9.0304e-07	7.70829e-06	3.77104e-06	TP53/SFRP1/BAX/THBS1/BAD/MYC/TRAF2/PTPRC/TNF/PPP2R1B/BBC3	11
BP	GO:0060393	regulation of pathway-restricted SMAD protein phosphorylation	8/233	62/18800	9.38012e-07	7.9904e-06	3.90906e-06	TGFB1/TGFB3/GREM1/TGFB2/TGFBR2/BMPR1A/BMP4/LRP1	8
BP	GO:0001935	endothelial cell proliferation	13/233	194/18800	9.45091e-07	8.03424e-06	3.9305e-06	MMP14/EPHA2/FGFR1/THBS4/THBS1/ITGA4/VEGFC/VEGFB/PIK3CD/TNF/BMP4/DLG1/SULF1	13
BP	GO:0046661	male sex differentiation	12/233	164/18800	9.86438e-07	8.36862e-06	4.09409e-06	MMP14/SFRP1/BAX/PDGFRA/KIT/PDGFRB/TGFB2/WNT4/BMPR1A/CCND1/CTNNB1/SOX9	12
BP	GO:0071356	cellular response to tumor necrosis factor	14/233	229/18800	1.08166e-06	9.13915e-06	4.47105e-06	MAPK1/PTK2B/TNFAIP3/TP53/SFRP1/NOL3/THBS1/COL1A1/TRAF2/CCL5/TNF/GAS6/TNFRSF1B/ADAMTS7	14
BP	GO:2000116	regulation of cysteine-type endopeptidase activity	14/233	229/18800	1.08166e-06	9.13915e-06	4.47105e-06	RAF1/NOL3/BAX/THBS1/BAD/MYC/RPS6KA3/TNF/FYN/SMAD3/BIRC5/BBC3/MMP9/GAS6	14
BP	GO:0042249	establishment of planar polarity of embryonic epithelium	5/233	16/18800	1.09462e-06	9.21124e-06	4.50631e-06	SFRP1/DVL3/FZD1/FZD2/DVL1	5
BP	GO:0045779	negative regulation of bone resorption	5/233	16/18800	1.09462e-06	9.21124e-06	4.50631e-06	TNFAIP3/GPR137B/INPP5D/UBASH3B/TMEM119	5
BP	GO:0032388	positive regulation of intracellular transport	13/233	198/18800	1.18972e-06	9.99121e-06	4.88789e-06	CDC42/TGFB1/RAC2/CHRM1/PRKAA1/HCLS1/FYN/ITGB2/SMAD3/TCF7L2/BBC3/GAS6/ANXA2	13
BP	GO:0002700	regulation of production of molecular mediator of immune response	12/233	167/18800	1.19581e-06	1.00222e-05	4.90304e-06	SPHK2/TGFB1/TGFB3/KIT/JAK3/IL1R1/TRAF2/TGFB2/STAT6/PTPRC/TNF/TNFRSF1B	12
BP	GO:0031638	zymogen activation	8/233	64/18800	1.20208e-06	1.00544e-05	4.9188e-06	MMP14/RUNX1/THBS1/BAD/SERPINE1/SERPINF2/ANXA2/FURIN	8
BP	GO:0042088	T-helper 1 type immune response	7/233	45/18800	1.24754e-06	1.04137e-05	5.09458e-06	SOCS5/JAK3/IL1R1/RELB/STAT6/BCL3/LEF1	7
BP	GO:0007260	tyrosine phosphorylation of STAT protein	9/233	87/18800	1.31002e-06	1.09133e-05	5.339e-06	KIT/JAK3/HCLS1/CCL5/TNF/INPP5F/FYN/SOCS3/NF2	9
BP	GO:0032944	regulation of mononuclear cell proliferation	14/233	233/18800	1.32888e-06	1.10483e-05	5.40506e-06	RAC2/INPP5D/IL7/CSF1/CDKN1A/JAK3/IL2RA/PTPRC/CCL5/TGFBR2/BMP4/DLG1/CTNNB1/TNFRSF1B	14
BP	GO:0034284	response to monosaccharide	13/233	200/18800	1.33199e-06	1.10521e-05	5.4069e-06	RAF1/PTK2B/COL6A2/THBS1/ITGA2/ANGPT2/BAD/PRKAA1/IGF1R/TGFBR2/SMAD2/TCF7L2/GAS6	13
BP	GO:0070613	regulation of protein processing	8/233	65/18800	1.35628e-06	1.12312e-05	5.4945e-06	MMP14/ADAM8/RUNX1/NOL3/THBS1/SERPINE1/SERPINF2/ANXA2	8
BP	GO:0060560	developmental growth involved in morphogenesis	14/233	234/18800	1.3981e-06	1.15545e-05	5.65266e-06	S1PR1/SFRP1/SPP1/LPAR3/ITGB1/FN1/CSF1/ITGA4/WNT7B/TGFBR2/BMP4/DVL1/CTNNB1/SOX9	14
BP	GO:1901888	regulation of cell junction assembly	13/233	201/18800	1.40866e-06	1.16186e-05	5.68406e-06	PTK2/MMP14/SFRP1/GREM1/EPHA2/THBS1/THBS2/TNF/WNT4/SNAI2/SMAD3/FZD1/FLOT1	13
BP	GO:0048864	stem cell development	9/233	88/18800	1.44369e-06	1.1884e-05	5.81387e-06	MAPK1/CDC42/FN1/LAMA5/PTPRC/SNAI2/BMPR1A/BMP4/SOX9	9
BP	GO:0046328	regulation of JNK cascade	11/233	141/18800	1.4974e-06	1.23017e-05	6.01825e-06	CDC42/PTK2B/SFRP1/IGF1R/TRAF2/GADD45A/TNF/AXIN1/WNT7B/FZD7/SERPINF2	11
BP	GO:0032835	glomerulus development	8/233	66/18800	1.52701e-06	1.24466e-05	6.08914e-06	PDGFRA/ANGPT2/PDGFRB/WWTR1/BMP4/SULF1/MPV17/SULF2	8
BP	GO:0038034	signal transduction in absence of ligand	8/233	66/18800	1.52701e-06	1.24466e-05	6.08914e-06	IL7/BAX/FGFR1/ERBB3/BAD/TNF/SNAI2/PPP2R1B	8
BP	GO:0060389	pathway-restricted SMAD protein phosphorylation	8/233	66/18800	1.52701e-06	1.24466e-05	6.08914e-06	TGFB1/TGFB3/GREM1/TGFB2/TGFBR2/BMPR1A/BMP4/LRP1	8
BP	GO:0097192	extrinsic apoptotic signaling pathway in absence of ligand	8/233	66/18800	1.52701e-06	1.24466e-05	6.08914e-06	IL7/BAX/FGFR1/ERBB3/BAD/TNF/SNAI2/PPP2R1B	8
BP	GO:0048339	paraxial mesoderm development	5/233	17/18800	1.53508e-06	1.24636e-05	6.09741e-06	LEF1/SMAD3/TEAD2/BMPR1A/SMAD2	5
BP	GO:2000811	negative regulation of anoikis	5/233	17/18800	1.53508e-06	1.24636e-05	6.09741e-06	PTK2/PDK4/ITGB1/ITGA5/SNAI2	5
BP	GO:0002703	regulation of leukocyte mediated immunity	14/233	236/18800	1.54627e-06	1.25299e-05	6.12988e-06	SPHK2/TGFB1/RAC2/IL7R/KIT/JAK3/IL1R1/TRAF2/STAT6/PTPRC/TNF/ITGB2/FOXF1/TNFRSF1B	14
BP	GO:0060325	face morphogenesis	6/233	30/18800	1.57298e-06	1.26969e-05	6.21155e-06	TGFB3/MMP2/PDGFRA/COL1A1/LEF1/CRISPLD2	6
BP	GO:0070168	negative regulation of biomineral tissue development	6/233	30/18800	1.57298e-06	1.26969e-05	6.21155e-06	TGFB1/PTK2B/LTBP3/GREM1/GAS6/SOX9	6
BP	GO:1905475	regulation of protein localization to membrane	12/233	172/18800	1.63313e-06	1.31568e-05	6.43657e-06	MMP14/TGFB1/EPHA2/ITGB1/TNF/FYN/ITGB2/DLG4/ACTB/DLG1/BBC3/LRP1	12
BP	GO:0043281	regulation of cysteine-type endopeptidase activity involved in apoptotic process	13/233	204/18800	1.66277e-06	1.33697e-05	6.54071e-06	RAF1/NOL3/BAX/THBS1/BAD/MYC/RPS6KA3/TNF/SMAD3/BIRC5/BBC3/MMP9/GAS6	13
BP	GO:0009416	response to light stimulus	16/233	310/18800	1.73e-06	1.38834e-05	6.79202e-06	TIMP1/MMP2/TP53/BAX/FOS/ITGB1/CDKN1A/KIT/MYC/PRKAA1/BCL3/ID2/CCND1/PPP1CB/MMP9/MFAP4	16
BP	GO:0007409	axonogenesis	19/233	430/18800	1.87341e-06	1.50053e-05	7.34088e-06	PTK2/RAC2/EPHA2/SPP1/LAMA3/LPAR3/EFNA4/ITGB1/FN1/ITGA4/LAMC2/EFNA1/LAMA5/IGF1R/FYN/ACTB/FZD3/DVL1/FLOT1	19
BP	GO:0097306	cellular response to alcohol	9/233	91/18800	1.91771e-06	1.5256e-05	7.46351e-06	SPHK2/SFRP1/GNB1/GNG2/MYC/PRKAA1/IGF1R/MAP4K1/CTNNB1	9
BP	GO:0043627	response to estrogen	8/233	68/18800	1.92389e-06	1.5256e-05	7.46351e-06	MMP14/TGFB3/MMP2/SFRP1/PDGFRB/MYC/TGFBR2/CCND1	8
BP	GO:1903317	regulation of protein maturation	8/233	68/18800	1.92389e-06	1.5256e-05	7.46351e-06	MMP14/ADAM8/RUNX1/NOL3/THBS1/SERPINE1/SERPINF2/ANXA2	8
BP	GO:0045577	regulation of B cell differentiation	6/233	31/18800	1.93039e-06	1.5256e-05	7.46351e-06	MMP14/INPP5D/SFRP1/IL7/BAD/ID2	6
BP	GO:0060351	cartilage development involved in endochondral bone morphogenesis	6/233	31/18800	1.93039e-06	1.5256e-05	7.46351e-06	THBS3/COL1A1/AXIN2/TGFBR2/COL27A1/SOX9	6
BP	GO:0060390	regulation of SMAD protein signal transduction	6/233	31/18800	1.93039e-06	1.5256e-05	7.46351e-06	TGFB1/TGFB3/WWTR1/BMPR1A/BMP4/LRP1	6
BP	GO:0110150	NA	6/233	31/18800	1.93039e-06	1.5256e-05	7.46351e-06	TGFB1/PTK2B/LTBP3/GREM1/GAS6/SOX9	6
BP	GO:0002697	regulation of immune effector process	17/233	353/18800	2.10079e-06	1.65031e-05	8.07364e-06	SPHK2/TGFB1/RAC2/TGFB3/SOCS5/IL7R/KIT/JAK3/IL1R1/TRAF2/TGFB2/STAT6/PTPRC/TNF/ITGB2/FOXF1/TNFRSF1B	17
BP	GO:0051492	regulation of stress fiber assembly	9/233	92/18800	2.10298e-06	1.65031e-05	8.07364e-06	CDC42/S1PR1/TGFB3/SFRP1/LPAR1/WNT4/NF2/SMAD3/SERPINF2	9
BP	GO:0010759	positive regulation of macrophage chemotaxis	5/233	18/18800	2.10408e-06	1.65031e-05	8.07364e-06	MAPK1/PTK2/THBS1/CSF1/CCL5	5
BP	GO:0072077	renal vesicle morphogenesis	5/233	18/18800	2.10408e-06	1.65031e-05	8.07364e-06	GREM1/WNT4/BMP4/CTNNB1/SOX9	5
BP	GO:0009411	response to UV	11/233	146/18800	2.11046e-06	1.6522e-05	8.08287e-06	TIMP1/MMP2/TP53/BAX/CDKN1A/MYC/PRKAA1/BCL3/CCND1/MMP9/MFAP4	11
BP	GO:0034614	cellular response to reactive oxygen species	11/233	147/18800	2.25657e-06	1.75927e-05	8.60669e-06	MAPK1/TNFAIP3/MMP2/AXL/FOS/PDGFRA/PRKAA1/STAT6/MMP9/MPV17/FBLN5	11
BP	GO:0022602	ovulation cycle process	7/233	49/18800	2.26416e-06	1.75927e-05	8.60669e-06	TGFB3/MMP2/PDGFRA/TGFB2/FZD4/MMP19/PTX3	7
BP	GO:0030225	macrophage differentiation	7/233	49/18800	2.26416e-06	1.75927e-05	8.60669e-06	CDC42/TGFB1/CSF1/HCLS1/BMP4/ID2/MMP9	7
BP	GO:0030850	prostate gland development	7/233	49/18800	2.26416e-06	1.75927e-05	8.60669e-06	MMP2/SFRP1/PRLR/BMP4/CTNNB1/SULF1/SOX9	7
BP	GO:0042176	regulation of protein catabolic process	18/233	395/18800	2.28965e-06	1.77576e-05	8.68734e-06	PTK2/TIMP1/PTK2B/TNFAIP3/ADAM8/SOCS5/EFNA1/TNF/FYN/AXIN1/CSNK1D/SMAD3/DVL1/LRP1/ANXA2/TNFRSF1B/SOX9/FURIN	18
BP	GO:0002063	chondrocyte development	6/233	32/18800	2.35138e-06	1.82024e-05	8.90495e-06	AXIN2/TGFBR2/SULF1/COL27A1/SULF2/SOX9	6
BP	GO:0090100	positive regulation of transmembrane receptor protein serine/threonine kinase signaling pathway	10/233	120/18800	2.48793e-06	1.92237e-05	9.40458e-06	TGFB1/TGFB3/THBS1/TGFB2/AXIN1/TGFBR2/BMPR1A/BMP4/SMAD2/SULF1	10
BP	GO:0006469	negative regulation of protein kinase activity	13/233	213/18800	2.68709e-06	2.0724e-05	1.01386e-05	TNFAIP3/SFRP1/UBASH3B/SOCS5/TSC2/CDKN1A/DUSP1/GADD45A/PTPRC/WWTR1/NF2/BMP4/DVL1	13
BP	GO:0014033	neural crest cell differentiation	9/233	95/18800	2.75425e-06	2.12026e-05	1.03727e-05	MAPK1/CDC42/SFRP1/FN1/LAMA5/SNAI2/BMPR1A/BMP4/SOX9	9
BP	GO:0060749	mammary gland alveolus development	5/233	19/18800	2.82676e-06	2.16406e-05	1.0587e-05	PRLR/SOCS2/ID2/CCND1/FOXF1	5
BP	GO:0061377	mammary gland lobule development	5/233	19/18800	2.82676e-06	2.16406e-05	1.0587e-05	PRLR/SOCS2/ID2/CCND1/FOXF1	5
BP	GO:0072087	renal vesicle development	5/233	19/18800	2.82676e-06	2.16406e-05	1.0587e-05	GREM1/WNT4/BMP4/CTNNB1/SOX9	5
BP	GO:0034612	response to tumor necrosis factor	14/233	249/18800	2.90229e-06	2.2178e-05	1.08499e-05	MAPK1/PTK2B/TNFAIP3/TP53/SFRP1/NOL3/THBS1/COL1A1/TRAF2/CCL5/TNF/GAS6/TNFRSF1B/ADAMTS7	14
BP	GO:0008360	regulation of cell shape	11/233	151/18800	2.9336e-06	2.23761e-05	1.09468e-05	PTK2/RAC3/RAC2/PTK2B/LPAR1/FN1/KIT/FYN/ITGB2/DLG1/PDPN	11
BP	GO:1903036	positive regulation of response to wounding	8/233	72/18800	2.98537e-06	2.26667e-05	1.1089e-05	PTK2/PTN/THBS1/ITGB1/IGF1R/SERPINE1/SERPINF2/HBEGF	8
BP	GO:0045668	negative regulation of osteoblast differentiation	7/233	51/18800	2.98805e-06	2.26667e-05	1.1089e-05	SFRP1/GREM1/VEGFC/TNF/SMAD3/AXIN2/SOX9	7
BP	GO:0071622	regulation of granulocyte chemotaxis	7/233	51/18800	2.98805e-06	2.26667e-05	1.1089e-05	MAPK1/PTK2/RAC2/THBS4/THBS1/CSF1/CCL5	7
BP	GO:0046330	positive regulation of JNK cascade	9/233	96/18800	3.00676e-06	2.2767e-05	1.11381e-05	CDC42/PTK2B/TRAF2/GADD45A/TNF/AXIN1/WNT7B/FZD7/SERPINF2	9
BP	GO:0045807	positive regulation of endocytosis	9/233	97/18800	3.27893e-06	2.47828e-05	1.21242e-05	CDC42/GREM1/AXL/ITGA2/ARRB1/SERPINE1/FLOT1/LRP1/ANXA2	9
BP	GO:0045123	cellular extravasation	8/233	73/18800	3.31733e-06	2.50275e-05	1.22439e-05	ADAM8/PIK3CG/ITGB1/ITGA4/ITGB7/PIK3CD/IL1R1/TNF	8
BP	GO:0035051	cardiocyte differentiation	11/233	153/18800	3.33442e-06	2.51108e-05	1.22847e-05	MAPK1/CDC42/TGFB1/GREM1/PDGFRA/ITGB1/PDGFRB/TGFB2/FZD7/BMPR1A/BMP4	11
BP	GO:0035196	production of miRNAs involved in gene silencing by miRNA	7/233	52/18800	3.41673e-06	2.55565e-05	1.25028e-05	TGFB1/TP53/TNF/SMAD3/SMAD1/BMP4/SMAD2	7
BP	GO:0048013	ephrin receptor signaling pathway	7/233	52/18800	3.41673e-06	2.55565e-05	1.25028e-05	PTK2/MMP2/EPHA2/EFNA4/EFNA1/FYN/MMP9	7
BP	GO:0043276	anoikis	6/233	34/18800	3.4182e-06	2.55565e-05	1.25028e-05	PTK2/PDK4/TSC2/ITGB1/ITGA5/SNAI2	6
BP	GO:0060323	head morphogenesis	6/233	34/18800	3.4182e-06	2.55565e-05	1.25028e-05	TGFB3/MMP2/PDGFRA/COL1A1/LEF1/CRISPLD2	6
BP	GO:0045669	positive regulation of osteoblast differentiation	8/233	74/18800	3.6801e-06	2.74653e-05	1.34365e-05	TMEM119/WWTR1/WNT4/WNT7B/SMAD1/BMPR1A/BMP4/CTNNB1	8
BP	GO:0002040	sprouting angiogenesis	12/233	186/18800	3.69696e-06	2.75417e-05	1.34739e-05	CDC42/PTK2B/GREM1/EPHA2/THBS1/ITGB1/VEGFC/VEGFB/ITGA5/LEF1/SMAD1/BMP4	12
BP	GO:0060231	mesenchymal to epithelial transition	5/233	20/18800	3.73105e-06	2.76964e-05	1.35496e-05	GREM1/WNT4/FZD7/BMP4/CTNNB1	5
BP	GO:0070233	negative regulation of T cell apoptotic process	5/233	20/18800	3.73105e-06	2.76964e-05	1.35496e-05	IL7R/EFNA1/JAK3/CCL5/BMP4	5
BP	GO:0048545	response to steroid hormone	16/233	330/18800	3.87217e-06	2.86927e-05	1.4037e-05	TGFB1/TGFB3/SFRP1/FOS/SPP1/THBS1/COL1A1/BAD/IGF1R/TGFB2/TNF/WNT7B/TGFBR2/BMP4/CCND1/LOX	16
BP	GO:0045639	positive regulation of myeloid cell differentiation	9/233	99/18800	3.88733e-06	2.87538e-05	1.40669e-05	TGFB1/INPP5D/RUNX1/FOS/CSF1/HCLS1/TNF/LEF1/ID2	9
BP	GO:0002460	adaptive immune response based on somatic recombination of immune receptors built from immunoglobulin superfamily domains	17/233	370/18800	3.95117e-06	2.91741e-05	1.42725e-05	TGFB1/TNFAIP3/INPP5D/SOCS5/IL7R/CD19/JAK3/IL1R1/TRAF2/RELB/STAT6/PTPRC/TNF/BCL3/LEF1/NFKB2/TNFRSF1B	17
BP	GO:0045927	positive regulation of growth	14/233	256/18800	4.00516e-06	2.95203e-05	1.44419e-05	CDC42/MMP14/PTK2B/SFRP1/IL7/LPAR3/FN1/CSF1/RPS6KA3/TGFB2/TGFBR2/BMPR1A/TEAD1/HBEGF	14
BP	GO:0032386	regulation of intracellular transport	16/233	332/18800	4.18232e-06	3.07715e-05	1.5054e-05	MAPK1/CDC42/TGFB1/RAC2/CHRM1/PRKAA1/HCLS1/INPP5F/FYN/ITGB2/SMAD3/BMP4/TCF7L2/BBC3/GAS6/ANXA2	16
BP	GO:0050769	positive regulation of neurogenesis	13/233	222/18800	4.23692e-06	3.11181e-05	1.52236e-05	TGFB1/PTN/TGM2/LPAR3/FN1/VEGFC/KIT/MYC/TNF/ID2/FZD3/CTNNB1/TNFRSF1B	13
BP	GO:0030856	regulation of epithelial cell differentiation	11/233	157/18800	4.28214e-06	3.13948e-05	1.5359e-05	PRLR/BAD/TNF/WWTR1/SERPINE1/BMP4/CCND1/ID1/CTNNB1/MMP9/SOX9	11
BP	GO:0009749	response to glucose	12/233	189/18800	4.36137e-06	3.19194e-05	1.56156e-05	RAF1/PTK2B/COL6A2/THBS1/ANGPT2/BAD/PRKAA1/IGF1R/TGFBR2/SMAD2/TCF7L2/GAS6	12
BP	GO:0006874	cellular calcium ion homeostasis	19/233	456/18800	4.40038e-06	3.21483e-05	1.57276e-05	S1PR1/PTK2B/TGM2/UBASH3B/NOL3/BAX/PTH1R/LPAR3/PIK3CG/PDGFRA/LPAR1/CD19/JAK3/PTPRC/CCL5/FYN/SMAD3/DLG4/PRKCB	19
BP	GO:0050870	positive regulation of T cell activation	13/233	223/18800	4.45045e-06	3.24171e-05	1.58591e-05	ADAM8/RUNX1/IL7/SOCS5/IL7R/BAD/JAK3/IL2RA/PTPRC/CCL5/FYN/LEF1/TGFBR2	13
BP	GO:0042542	response to hydrogen peroxide	10/233	128/18800	4.46057e-06	3.24171e-05	1.58591e-05	PTK2B/TNFAIP3/MMP2/AXL/COL1A1/BAD/PDGFRB/PRKAA1/STAT6/FYN	10
BP	GO:1990266	neutrophil migration	10/233	128/18800	4.46057e-06	3.24171e-05	1.58591e-05	RAC2/ADAM8/CSF3R/PIK3CG/THBS4/PIK3CD/IL1R1/TGFB2/CCL5/ITGB2	10
BP	GO:0072089	stem cell proliferation	8/233	76/18800	4.50729e-06	3.26995e-05	1.59972e-05	LTBP3/RUNX1/VEGFC/PTPRC/NF2/SNAI2/WNT7B/FBLN1	8
BP	GO:0002443	leukocyte mediated immunity	19/233	457/18800	4.54124e-06	3.28107e-05	1.60516e-05	SPHK2/TGFB1/RAC2/INPP5D/PIK3CG/IL7R/CD19/KIT/JAK3/PIK3CD/IL1R1/TRAF2/STAT6/PTPRC/TNF/BCL3/ITGB2/FOXF1/TNFRSF1B	19
BP	GO:0007440	foregut morphogenesis	4/233	10/18800	4.55419e-06	3.28107e-05	1.60516e-05	SMAD3/SMAD2/CTNNB1/FOXF1	4
BP	GO:0048340	paraxial mesoderm morphogenesis	4/233	10/18800	4.55419e-06	3.28107e-05	1.60516e-05	LEF1/SMAD3/BMPR1A/SMAD2	4
BP	GO:0090184	positive regulation of kidney development	4/233	10/18800	4.55419e-06	3.28107e-05	1.60516e-05	MYC/WNT4/BMP4/SOX9	4
BP	GO:0008630	intrinsic apoptotic signaling pathway in response to DNA damage	9/233	101/18800	4.59023e-06	3.29561e-05	1.61228e-05	TP53/EPHA2/BAX/CDKN1A/BAD/TNF/BCL3/SNAI2/TNFRSF1B	9
BP	GO:0110020	regulation of actomyosin structure organization	9/233	101/18800	4.59023e-06	3.29561e-05	1.61228e-05	CDC42/S1PR1/TGFB3/SFRP1/LPAR1/WNT4/NF2/SMAD3/SERPINF2	9
BP	GO:0033157	regulation of intracellular protein transport	13/233	224/18800	4.67345e-06	3.34381e-05	1.63586e-05	CDC42/TGFB1/RAC2/CHRM1/PRKAA1/HCLS1/FYN/ITGB2/SMAD3/BMP4/TCF7L2/BBC3/GAS6	13
BP	GO:0046777	protein autophosphorylation	13/233	224/18800	4.67345e-06	3.34381e-05	1.63586e-05	PTK2/PTK2B/GREM1/FGFR1/PDGFRA/VEGFC/KIT/PDGFRB/IGF1R/MAP4K1/PTPRC/FYN/MOB1B	13
BP	GO:0001101	response to acid chemical	10/233	129/18800	4.78355e-06	3.41671e-05	1.67152e-05	MMP2/PDGFRA/COL6A1/COL4A1/COL1A1/BAD/MYC/IGF1R/TNF/FYN	10
BP	GO:0045063	T-helper 1 cell differentiation	5/233	21/18800	4.84768e-06	3.43983e-05	1.68283e-05	SOCS5/JAK3/RELB/STAT6/LEF1	5
BP	GO:0071636	positive regulation of transforming growth factor beta production	5/233	21/18800	4.84768e-06	3.43983e-05	1.68283e-05	THBS1/SMAD3/BMPR1A/SERPINF2/FURIN	5
BP	GO:0035909	aorta morphogenesis	6/233	36/18800	4.84903e-06	3.43983e-05	1.68283e-05	PDGFRB/TGFB2/BMPR1A/FKBP10/EFEMP2/LRP1	6
BP	GO:1905332	positive regulation of morphogenesis of an epithelium	6/233	36/18800	4.84903e-06	3.43983e-05	1.68283e-05	GREM1/PIK3CD/WNT4/BMP4/CTNNB1/SOX9	6
BP	GO:0043154	negative regulation of cysteine-type endopeptidase activity involved in apoptotic process	8/233	77/18800	4.97669e-06	3.52438e-05	1.72419e-05	RAF1/NOL3/THBS1/RPS6KA3/TNF/BIRC5/MMP9/GAS6	8
BP	GO:0061098	positive regulation of protein tyrosine kinase activity	7/233	55/18800	5.02165e-06	3.54414e-05	1.73386e-05	GREM1/ERBB3/EFNA1/CCL5/DLG4/GAS6/HBEGF	7
BP	GO:1904645	response to amyloid-beta	7/233	55/18800	5.02165e-06	3.54414e-05	1.73386e-05	MMP2/ITGA4/IGF1R/TNF/FYN/MMP9/LRP1	7
BP	GO:0010952	positive regulation of peptidase activity	12/233	192/18800	5.12871e-06	3.61356e-05	1.76783e-05	MAPK12/BAX/FN1/BAD/EFNA1/MYC/TNF/FYN/SMAD3/BBC3/ANTXR1/FBLN1	12
BP	GO:1905477	positive regulation of protein localization to membrane	9/233	103/18800	5.3995e-06	3.79792e-05	1.85802e-05	EPHA2/ITGB1/TNF/FYN/ITGB2/DLG4/DLG1/BBC3/LRP1	9
BP	GO:0009746	response to hexose	12/233	193/18800	5.40963e-06	3.79862e-05	1.85836e-05	RAF1/PTK2B/COL6A2/THBS1/ANGPT2/BAD/PRKAA1/IGF1R/TGFBR2/SMAD2/TCF7L2/GAS6	12
BP	GO:0051250	negative regulation of lymphocyte activation	11/233	161/18800	5.45749e-06	3.82566e-05	1.87159e-05	TNFAIP3/INPP5D/SFRP1/RUNX1/AXL/SOCS5/JAK3/IL2RA/BMP4/ID2/DLG1	11
BP	GO:0051054	positive regulation of DNA metabolic process	14/233	263/18800	5.46655e-06	3.82566e-05	1.87159e-05	MAPK1/CDC42/TGFB1/PTK2B/GREM1/BAX/PDGFRB/MYC/IGF1R/STAT6/PTPRC/TNF/ACTB/CTNNB1	14
BP	GO:0033077	T cell differentiation in thymus	8/233	78/18800	5.48683e-06	3.8334e-05	1.87537e-05	TP53/ADAM8/IL7R/PTPRC/WNT4/FZD7/BMP4/CTNNB1	8
BP	GO:0043113	receptor clustering	7/233	56/18800	5.67902e-06	3.95439e-05	1.93456e-05	PTN/ITGA4/ITGB7/ITGB2/DLG4/DVL1/DLG1	7
BP	GO:0070918	production of small RNA involved in gene silencing by RNA	7/233	56/18800	5.67902e-06	3.95439e-05	1.93456e-05	TGFB1/TP53/TNF/SMAD3/SMAD1/BMP4/SMAD2	7
BP	GO:0003176	aortic valve development	6/233	37/18800	5.72796e-06	3.98179e-05	1.94797e-05	TGFB1/EFNA1/SNAI2/BMP4/TNFRSF1B/SOX9	6
BP	GO:0016311	dephosphorylation	18/233	422/18800	5.74482e-06	3.98685e-05	1.95044e-05	TGFB1/INPP5D/UBASH3B/PPP2R2B/ITGA2/PDGFRB/PPM1B/TGFB2/PTPN7/DUSP1/PTPRC/TNF/INPP5F/SMAD3/FBXW11/PPP2R1B/DLG1/PPP1CB	18
BP	GO:0035270	endocrine system development	10/233	132/18800	5.87718e-06	4.0719e-05	1.99205e-05	MAPK1/RAF1/PDGFRA/BAD/WNT4/SMAD3/BMPR1A/BMP4/SMAD2/SOX9	10
BP	GO:0051091	positive regulation of DNA-binding transcription factor activity	14/233	265/18800	5.96305e-06	4.12453e-05	2.0178e-05	ADAM8/GREM1/LPAR5/KIT/TRAF2/HCLS1/TNF/SMAD3/FZD4/FZD1/FZD2/CTNNB1/FLOT1/PRKCB	14
BP	GO:0051495	positive regulation of cytoskeleton organization	12/233	195/18800	6.01235e-06	4.15172e-05	2.0311e-05	CDC42/PTK2B/TGFB3/SFRP1/LPAR1/HCLS1/WNT4/NF2/SMAD3/ID1/DLG1/SERPINF2	12
BP	GO:0006970	response to osmotic stress	8/233	79/18800	6.04053e-06	4.15736e-05	2.03386e-05	PTK2B/TP53/BAX/ITGA2/BAD/RELB/AKR1B1/TNF	8
BP	GO:0048844	artery morphogenesis	8/233	79/18800	6.04053e-06	4.15736e-05	2.03386e-05	PDGFRB/TGFB2/BMPR1A/BMP4/FKBP10/FOXF1/EFEMP2/LRP1	8
BP	GO:0062012	regulation of small molecule metabolic process	16/233	342/18800	6.09312e-06	4.18662e-05	2.04818e-05	SPHK2/PDK4/PTK2B/TP53/PTH1R/BAD/GNB3/KIT/MYC/PRKAA1/TNF/MST1/WNT4/SNAI2/PPP1CB/SOX9	16
BP	GO:0007398	ectoderm development	5/233	22/18800	6.21031e-06	4.24609e-05	2.07727e-05	ITGA6/NF2/FZD7/BMPR1A/CTNNB1	5
BP	GO:0044346	fibroblast apoptotic process	5/233	22/18800	6.21031e-06	4.24609e-05	2.07727e-05	TP53/SFRP1/PIK3CG/MYC/GAS6	5
BP	GO:0060445	branching involved in salivary gland morphogenesis	5/233	22/18800	6.21031e-06	4.24609e-05	2.07727e-05	TGM2/FGF7/LAMA5/TNF/SNAI2	5
BP	GO:0050670	regulation of lymphocyte proliferation	13/233	230/18800	6.23139e-06	4.25351e-05	2.0809e-05	RAC2/INPP5D/IL7/CDKN1A/JAK3/IL2RA/PTPRC/CCL5/TGFBR2/BMP4/DLG1/CTNNB1/TNFRSF1B	13
BP	GO:0055074	calcium ion homeostasis	19/233	468/18800	6.38295e-06	4.34982e-05	2.12802e-05	S1PR1/PTK2B/TGM2/UBASH3B/NOL3/BAX/PTH1R/LPAR3/PIK3CG/PDGFRA/LPAR1/CD19/JAK3/PTPRC/CCL5/FYN/SMAD3/DLG4/PRKCB	19
BP	GO:0001541	ovarian follicle development	7/233	57/18800	6.40639e-06	4.35865e-05	2.13234e-05	MMP14/MMP2/BAX/KIT/MYC/MMP19/PTX3	7
BP	GO:0003151	outflow tract morphogenesis	8/233	80/18800	6.64075e-06	4.51072e-05	2.20673e-05	CDC42/TGFB2/FZD1/FZD2/TGFBR2/BMPR1A/BMP4/CTNNB1	8
BP	GO:0060840	artery development	9/233	106/18800	6.8416e-06	4.63957e-05	2.26976e-05	PDGFRB/TGFB2/BMPR1A/BMP4/LOX/FKBP10/FOXF1/EFEMP2/LRP1	9
BP	GO:0043589	skin morphogenesis	4/233	11/18800	7.08699e-06	4.79034e-05	2.34353e-05	ITGB4/ITGA6/COL1A1/ITGA2	4
BP	GO:0060433	bronchus development	4/233	11/18800	7.08699e-06	4.79034e-05	2.34353e-05	WNT7B/TGFBR2/BMP4/SOX9	4
BP	GO:0045732	positive regulation of protein catabolic process	13/233	233/18800	7.17011e-06	4.83866e-05	2.36716e-05	PTK2/PTK2B/TNFAIP3/ADAM8/SOCS5/TNF/AXIN1/CSNK1D/DVL1/LRP1/TNFRSF1B/SOX9/FURIN	13
BP	GO:0051052	regulation of DNA metabolic process	19/233	472/18800	7.20436e-06	4.84952e-05	2.37248e-05	MAPK1/CDC42/TGFB1/PTK2B/TP53/GREM1/BAX/IL7R/CDKN1A/PDGFRB/MYC/IGF1R/STAT6/PTPRC/TNF/AXIN2/ACTB/CTNNB1/MPV17	19
BP	GO:0033619	membrane protein proteolysis	7/233	58/18800	7.20954e-06	4.84952e-05	2.37248e-05	TGFB1/TIMP1/ADAM8/TNF/MMP7/TNFRSF1B/FURIN	7
BP	GO:0051348	negative regulation of transferase activity	14/233	270/18800	7.38376e-06	4.95069e-05	2.42197e-05	TNFAIP3/TP53/SFRP1/UBASH3B/SOCS5/TSC2/CDKN1A/DUSP1/GADD45A/PTPRC/WWTR1/NF2/BMP4/DVL1	14
BP	GO:0051962	positive regulation of nervous system development	14/233	270/18800	7.38376e-06	4.95069e-05	2.42197e-05	TGFB1/PTN/TGM2/LPAR3/FN1/VEGFC/KIT/THBS2/MYC/TNF/ID2/FZD3/CTNNB1/TNFRSF1B	14
BP	GO:0050864	regulation of B cell activation	12/233	200/18800	7.78435e-06	5.21088e-05	2.54926e-05	MMP14/TGFB1/TNFAIP3/INPP5D/SFRP1/IL7/CD19/CDKN1A/BAD/STAT6/PTPRC/ID2	12
BP	GO:0033673	negative regulation of kinase activity	13/233	236/18800	8.23153e-06	5.50136e-05	2.69137e-05	TNFAIP3/SFRP1/UBASH3B/SOCS5/TSC2/CDKN1A/DUSP1/GADD45A/PTPRC/WWTR1/NF2/BMP4/DVL1	13
BP	GO:0045444	fat cell differentiation	13/233	237/18800	8.61492e-06	5.74835e-05	2.8122e-05	TGFB1/SFRP1/PDGFRA/GNB3/TNF/AXIN1/WWTR1/SNAI2/SMAD3/ID2/CCND1/TCF7L2/MMP11	13
BP	GO:0014032	neural crest cell development	8/233	83/18800	8.75259e-06	5.81222e-05	2.84345e-05	MAPK1/CDC42/FN1/LAMA5/SNAI2/BMPR1A/BMP4/SOX9	8
BP	GO:0033273	response to vitamin	8/233	83/18800	8.75259e-06	5.81222e-05	2.84345e-05	SFRP1/SPP1/COL1A1/ITGA2/IGF1R/SNAI2/CCND1/GAS6	8
BP	GO:0042509	regulation of tyrosine phosphorylation of STAT protein	8/233	83/18800	8.75259e-06	5.81222e-05	2.84345e-05	KIT/HCLS1/CCL5/TNF/INPP5F/FYN/SOCS3/NF2	8
BP	GO:0061053	somite development	8/233	84/18800	9.5717e-06	6.34602e-05	3.1046e-05	TP53/SFRP1/WNT4/LEF1/SMAD3/AXIN2/BMPR1A/FOXF1	8
BP	GO:0051043	regulation of membrane protein ectodomain proteolysis	5/233	24/18800	9.82291e-06	6.48156e-05	3.1709e-05	TIMP1/ADAM8/TNF/TNFRSF1B/FURIN	5
BP	GO:0072202	cell differentiation involved in metanephros development	5/233	24/18800	9.82291e-06	6.48156e-05	3.1709e-05	GREM1/WWTR1/WNT4/BMP4/CTNNB1	5
BP	GO:2000209	regulation of anoikis	5/233	24/18800	9.82291e-06	6.48156e-05	3.1709e-05	PTK2/PDK4/ITGB1/ITGA5/SNAI2	5
BP	GO:0008584	male gonad development	10/233	140/18800	9.91171e-06	6.52979e-05	3.1945e-05	MMP14/SFRP1/BAX/PDGFRA/KIT/PDGFRB/TGFB2/WNT4/CCND1/SOX9	10
BP	GO:0031532	actin cytoskeleton reorganization	9/233	111/18800	9.97859e-06	6.56345e-05	3.21097e-05	CDC42/S1PR1/PTK2B/SHC1/PDGFRA/FGF7/KIT/HCLS1/ANTXR1	9
BP	GO:0008625	extrinsic apoptotic signaling pathway via death domain receptors	8/233	85/18800	1.04545e-05	6.84402e-05	3.34823e-05	RAF1/TNFAIP3/SFRP1/BAX/THBS1/BAD/TNF/SERPINE1	8
BP	GO:0071229	cellular response to acid chemical	8/233	85/18800	1.04545e-05	6.84402e-05	3.34823e-05	MMP2/PDGFRA/COL6A1/COL4A1/COL1A1/MYC/TNF/FYN	8
BP	GO:2000117	negative regulation of cysteine-type endopeptidase activity	8/233	85/18800	1.04545e-05	6.84402e-05	3.34823e-05	RAF1/NOL3/THBS1/RPS6KA3/TNF/BIRC5/MMP9/GAS6	8
BP	GO:0046546	development of primary male sexual characteristics	10/233	141/18800	1.0554e-05	6.89828e-05	3.37477e-05	MMP14/SFRP1/BAX/PDGFRA/KIT/PDGFRB/TGFB2/WNT4/CCND1/SOX9	10
BP	GO:0002698	negative regulation of immune effector process	9/233	112/18800	1.0735e-05	7.00553e-05	3.42724e-05	TGFB1/TGFB3/SOCS5/IL7R/JAK3/TGFB2/PTPRC/TNF/FOXF1	9
BP	GO:0002822	regulation of adaptive immune response based on somatic recombination of immune receptors built from immunoglobulin superfamily domains	11/233	173/18800	1.08329e-05	7.05838e-05	3.45309e-05	TGFB1/TNFAIP3/SOCS5/IL7R/JAK3/IL1R1/TRAF2/STAT6/PTPRC/TNF/TNFRSF1B	11
BP	GO:0010212	response to ionizing radiation	10/233	142/18800	1.12319e-05	7.29549e-05	3.56909e-05	TP53/SFRP1/BAX/CDKN1A/MYC/PRKAA1/GADD45A/PTPRC/SNAI2/CCND1	10
BP	GO:0045598	regulation of fat cell differentiation	10/233	142/18800	1.12319e-05	7.29549e-05	3.56909e-05	TGFB1/SFRP1/GNB3/TNF/AXIN1/WWTR1/SNAI2/SMAD3/ID2/MMP11	10
BP	GO:0035904	aorta development	7/233	62/18800	1.1307e-05	7.33279e-05	3.58734e-05	PDGFRB/TGFB2/BMPR1A/LOX/FKBP10/EFEMP2/LRP1	7
BP	GO:0031639	plasminogen activation	5/233	25/18800	1.21551e-05	7.84608e-05	3.83845e-05	RUNX1/THBS1/SERPINE1/SERPINF2/ANXA2	5
BP	GO:0050927	positive regulation of positive chemotaxis	5/233	25/18800	1.21551e-05	7.84608e-05	3.83845e-05	S1PR1/ITGA2/VEGFC/VEGFB/SMAD3	5
BP	GO:0060343	trabecula formation	5/233	25/18800	1.21551e-05	7.84608e-05	3.83845e-05	MMP2/SFRP1/GREM1/THBS3/COL1A1	5
BP	GO:0060412	ventricular septum morphogenesis	6/233	42/18800	1.22734e-05	7.91014e-05	3.86979e-05	TGFB2/FZD1/FZD2/TGFBR2/BMPR1A/BMP4	6
BP	GO:0045926	negative regulation of growth	13/233	245/18800	1.22937e-05	7.91099e-05	3.87021e-05	SPHK2/TGFB1/TP53/SFRP1/GREM1/SOCS2/SPP1/CDKN1A/TGFB2/CRLF3/SMAD3/TGFBR2/BMP4	13
BP	GO:0043200	response to amino acid	9/233	114/18800	1.23955e-05	7.96413e-05	3.8962e-05	MMP2/PDGFRA/COL6A1/COL4A1/COL1A1/BAD/IGF1R/TNF/FYN	9
BP	GO:0002088	lens development in camera-type eye	8/233	87/18800	1.24273e-05	7.97228e-05	3.90019e-05	EPHA2/NF2/SMAD3/WNT7B/TGFBR2/BMP4/DLG1/CTNNB1	8
BP	GO:0051893	regulation of focal adhesion assembly	7/233	63/18800	1.25875e-05	8.05018e-05	3.9383e-05	PTK2/MMP14/SFRP1/GREM1/THBS1/WNT4/SMAD3	7
BP	GO:0090109	regulation of cell-substrate junction assembly	7/233	63/18800	1.25875e-05	8.05018e-05	3.9383e-05	PTK2/MMP14/SFRP1/GREM1/THBS1/WNT4/SMAD3	7
BP	GO:0030177	positive regulation of Wnt signaling pathway	10/233	144/18800	1.27011e-05	8.09792e-05	3.96166e-05	TGFB1/TNFAIP3/SFRP1/COL1A1/PPM1B/CSNK1D/LEF1/SMAD3/SULF1/SULF2	10
BP	GO:0033135	regulation of peptidyl-serine phosphorylation	10/233	144/18800	1.27011e-05	8.09792e-05	3.96166e-05	RAF1/TGFB1/BAX/PRKAA1/HCLS1/GADD45A/TNF/INPP5F/AXIN1/GAS6	10
BP	GO:0048736	appendage development	11/233	177/18800	1.344e-05	8.54281e-05	4.17931e-05	GREM1/BAX/ITGB4/ITGA6/TGFB2/LEF1/BMPR1A/BMP4/FZD6/CTNNB1/SOX9	11
BP	GO:0060173	limb development	11/233	177/18800	1.344e-05	8.54281e-05	4.17931e-05	GREM1/BAX/ITGB4/ITGA6/TGFB2/LEF1/BMPR1A/BMP4/FZD6/CTNNB1/SOX9	11
BP	GO:0014031	mesenchymal cell development	8/233	88/18800	1.35257e-05	8.57108e-05	4.19314e-05	MAPK1/CDC42/FN1/LAMA5/SNAI2/BMPR1A/BMP4/SOX9	8
BP	GO:0034644	cellular response to UV	8/233	88/18800	1.35257e-05	8.57108e-05	4.19314e-05	TIMP1/MMP2/TP53/BAX/CDKN1A/MYC/MMP9/MFAP4	8
BP	GO:0072503	cellular divalent inorganic cation homeostasis	19/233	494/18800	1.36776e-05	8.65417e-05	4.23379e-05	S1PR1/PTK2B/TGM2/UBASH3B/NOL3/BAX/PTH1R/LPAR3/PIK3CG/PDGFRA/LPAR1/CD19/JAK3/PTPRC/CCL5/FYN/SMAD3/DLG4/PRKCB	19
BP	GO:0043507	positive regulation of JUN kinase activity	6/233	43/18800	1.41169e-05	8.91856e-05	4.36313e-05	PTK2B/TRAF2/TNF/AXIN1/FZD4/DVL3	6
BP	GO:0001942	hair follicle development	8/233	89/18800	1.47046e-05	9.26168e-05	4.53099e-05	FGF7/LAMA5/TGFB2/TNF/FZD3/FZD6/CTNNB1/SOX9	8
BP	GO:0097581	lamellipodium organization	8/233	89/18800	1.47046e-05	9.26168e-05	4.53099e-05	CDC42/S1PR1/RAC2/EPHA2/ITGB1/KIT/PDPN/FSCN1	8
BP	GO:0060561	apoptotic process involved in morphogenesis	5/233	26/18800	1.48978e-05	9.32684e-05	4.56287e-05	BAX/TGFB2/LEF1/PPP2R1B/TNFRSF1B	5
BP	GO:0060740	prostate gland epithelium morphogenesis	5/233	26/18800	1.48978e-05	9.32684e-05	4.56287e-05	MMP2/SFRP1/BMP4/SULF1/SOX9	5
BP	GO:0071378	cellular response to growth hormone stimulus	5/233	26/18800	1.48978e-05	9.32684e-05	4.56287e-05	PTK2/SOCS2/JAK3/MYC/STAT6	5
BP	GO:0090200	positive regulation of release of cytochrome c from mitochondria	5/233	26/18800	1.48978e-05	9.32684e-05	4.56287e-05	TP53/BAX/BAD/BBC3/MMP9	5
BP	GO:0050777	negative regulation of immune response	11/233	179/18800	1.49365e-05	9.33699e-05	4.56784e-05	TNFAIP3/INPP5D/SOCS5/IL7R/JAK3/STAT6/PTPRC/FYN/NMI/FOXF1/FURIN	11
BP	GO:0007183	SMAD protein complex assembly	4/233	13/18800	1.50581e-05	9.39888e-05	4.59811e-05	TGFB1/SMAD3/SMAD1/SMAD2	4
BP	GO:0001756	somitogenesis	7/233	65/18800	1.55099e-05	9.63748e-05	4.71484e-05	TP53/SFRP1/LEF1/SMAD3/AXIN2/BMPR1A/FOXF1	7
BP	GO:0031100	animal organ regeneration	7/233	65/18800	1.55099e-05	9.63748e-05	4.71484e-05	AXL/ANGPT2/MYC/TNF/TGFBR2/CCND1/GAS6	7
BP	GO:0048645	animal organ formation	7/233	65/18800	1.55099e-05	9.63748e-05	4.71484e-05	MAPK1/AXIN2/TGFBR2/BMPR1A/BMP4/CTNNB1/SULF1	7
BP	GO:0060191	regulation of lipase activity	8/233	90/18800	1.59688e-05	9.90781e-05	4.84709e-05	FGFR1/PDGFRA/LPAR1/KIT/PDGFRB/CCL5/LRP1/FURIN	8
BP	GO:0006509	membrane protein ectodomain proteolysis	6/233	44/18800	1.61778e-05	0.000100076	4.89592e-05	TIMP1/ADAM8/TNF/MMP7/TNFRSF1B/FURIN	6
BP	GO:0014009	glial cell proliferation	6/233	44/18800	1.61778e-05	0.000100076	4.89592e-05	PTK2B/CSF1/CHRM1/MYC/TNF/NF2	6
BP	GO:0010517	regulation of phospholipase activity	7/233	66/18800	1.71689e-05	0.000105892	5.18044e-05	FGFR1/PDGFRA/LPAR1/KIT/PDGFRB/CCL5/LRP1	7
BP	GO:0071677	positive regulation of mononuclear cell migration	7/233	66/18800	1.71689e-05	0.000105892	5.18044e-05	PTK2B/ADAM8/ITGA4/CCL5/TNF/SERPINE1/GAS6	7
BP	GO:0072676	lymphocyte migration	9/233	119/18800	1.75332e-05	0.000107819	5.2747e-05	S1PR1/PTK2B/ADAM8/PIK3CG/ITGA4/ITGB7/PIK3CD/CCL5/GAS6	9
BP	GO:2000278	regulation of DNA biosynthetic process	9/233	119/18800	1.75332e-05	0.000107819	5.2747e-05	MAPK1/PTK2B/TP53/GREM1/CDKN1A/PDGFRB/MYC/TNF/CTNNB1	9
BP	GO:0002719	negative regulation of cytokine production involved in immune response	5/233	27/18800	1.80998e-05	0.000110811	5.42111e-05	TGFB1/TGFB3/JAK3/TGFB2/TNF	5
BP	GO:0046426	negative regulation of JAK-STAT cascade	5/233	27/18800	1.80998e-05	0.000110811	5.42111e-05	SOCS2/INPP5F/BCL3/SOCS3/NF2	5
BP	GO:2000108	positive regulation of leukocyte apoptotic process	5/233	27/18800	1.80998e-05	0.000110811	5.42111e-05	TP53/ADAM8/BAX/PIK3CD/CCL5	5
BP	GO:0043535	regulation of blood vessel endothelial cell migration	10/233	150/18800	1.81445e-05	0.000110922	5.42651e-05	TGFB1/EPHA2/FGFR1/THBS1/ANGPT4/ANGPT2/VEGFC/EFNA1/GADD45A/TNF	10
BP	GO:0006109	regulation of carbohydrate metabolic process	11/233	183/18800	1.83684e-05	0.000112125	5.48539e-05	TGFB1/PDK4/PTK2B/TP53/PTH1R/BAD/GNB3/MYC/PRKAA1/MST1/PPP1CB	11
BP	GO:0010171	body morphogenesis	6/233	45/18800	1.84748e-05	0.00011261	5.50908e-05	TGFB3/MMP2/PDGFRA/COL1A1/LEF1/CRISPLD2	6
BP	GO:0010001	glial cell differentiation	12/233	218/18800	1.85243e-05	0.000112746	5.51576e-05	MAPK1/TGFB1/PTN/ITGB4/ERBB3/TNF/LEF1/ID2/CTNNB1/LRP1/TNFRSF1B/SOX9	12
BP	GO:0009953	dorsal/ventral pattern formation	8/233	92/18800	1.87727e-05	0.000113758	5.56526e-05	SFRP1/GREM1/AXIN1/AXIN2/BMPR1A/BMP4/SMAD2/CTNNB1	8
BP	GO:0022404	molting cycle process	8/233	92/18800	1.87727e-05	0.000113758	5.56526e-05	FGF7/LAMA5/TGFB2/TNF/FZD3/FZD6/CTNNB1/SOX9	8
BP	GO:0022405	hair cycle process	8/233	92/18800	1.87727e-05	0.000113758	5.56526e-05	FGF7/LAMA5/TGFB2/TNF/FZD3/FZD6/CTNNB1/SOX9	8
BP	GO:0072678	T cell migration	7/233	67/18800	1.89718e-05	0.000114797	5.6161e-05	S1PR1/ADAM8/PIK3CG/ITGA4/ITGB7/PIK3CD/CCL5	7
BP	GO:0034504	protein localization to nucleus	14/233	294/18800	1.92606e-05	0.000116376	5.69332e-05	TGFB1/TP53/TSC2/COL1A1/CDKN1A/HCLS1/FYN/BCL3/WWTR1/NF2/SMAD3/BMP4/DVL1/SOX9	14
BP	GO:1902903	regulation of supramolecular fiber organization	16/233	376/18800	1.97731e-05	0.000119299	5.83632e-05	CDC42/S1PR1/PTK2B/TGFB3/SFRP1/TNXB/LPAR1/HCLS1/WNT4/NF2/SMAD3/ID1/DLG1/SERPINF2/EFEMP2/AEBP1	16
BP	GO:0097193	intrinsic apoptotic signaling pathway	14/233	295/18800	2.00009e-05	0.000120498	5.89499e-05	TP53/EPHA2/NOL3/BAX/CDKN1A/BAD/MYC/TRAF2/TNF/BCL3/SNAI2/BBC3/MMP9/TNFRSF1B	14
BP	GO:0038127	ERBB signaling pathway	9/233	121/18800	2.00444e-05	0.000120586	5.89928e-05	MAPK1/PTK2/TGFB1/PTK2B/SHC1/SOCS5/MMP9/SOX9/HBEGF	9
BP	GO:0070374	positive regulation of ERK1 and ERK2 cascade	12/233	220/18800	2.02837e-05	0.000121556	5.94676e-05	TGFB1/PTK2B/SHC1/PDGFRA/PDGFRB/ARRB1/PTPRC/CCL5/TNF/BMP4/SERPINF2/GAS6	12
BP	GO:0002275	myeloid cell activation involved in immune response	8/233	93/18800	2.03227e-05	0.000121556	5.94676e-05	SPHK2/RAC2/PIK3CG/KIT/PIK3CD/NMI/ITGB2/FOXF1	8
BP	GO:0034109	homotypic cell-cell adhesion	8/233	93/18800	2.03227e-05	0.000121556	5.94676e-05	UBASH3B/PIK3CG/PDGFRA/FN1/CCL5/ACTB/PDPN/ADAMTS18	8
BP	GO:0098773	skin epidermis development	8/233	93/18800	2.03227e-05	0.000121556	5.94676e-05	FGF7/LAMA5/TGFB2/TNF/FZD3/FZD6/CTNNB1/SOX9	8
BP	GO:0021700	developmental maturation	14/233	296/18800	2.07661e-05	0.000123977	6.06519e-05	RAC3/S1PR1/PTK2B/MMP2/GREM1/AXL/PTH1R/THBS3/TGFB2/AKR1B1/YWHAZ/DLG4/CTNNB1/ADAMTS7	14
BP	GO:0045579	positive regulation of B cell differentiation	4/233	14/18800	2.08765e-05	0.000123977	6.06519e-05	MMP14/INPP5D/IL7/BAD	4
BP	GO:0048368	lateral mesoderm development	4/233	14/18800	2.08765e-05	0.000123977	6.06519e-05	TEAD2/BMPR1A/SMAD2/FOXF1	4
BP	GO:0070141	response to UV-A	4/233	14/18800	2.08765e-05	0.000123977	6.06519e-05	TIMP1/MMP2/CCND1/MMP9	4
BP	GO:0072672	neutrophil extravasation	4/233	14/18800	2.08765e-05	0.000123977	6.06519e-05	ADAM8/PIK3CG/PIK3CD/IL1R1	4
BP	GO:0150116	NA	7/233	68/18800	2.09281e-05	0.000124106	6.07149e-05	PTK2/MMP14/SFRP1/GREM1/THBS1/WNT4/SMAD3	7
BP	GO:0090199	regulation of release of cytochrome c from mitochondria	6/233	46/18800	2.10276e-05	0.000124518	6.09167e-05	TP53/NOL3/BAX/BAD/BBC3/MMP9	6
BP	GO:0051302	regulation of cell division	11/233	186/18800	2.13722e-05	0.000126379	6.1827e-05	CDC42/TGFB1/PTN/TGFB3/THBS4/FGF7/VEGFC/VEGFB/MYC/IGF1R/TGFB2	11
BP	GO:0001958	endochondral ossification	5/233	28/18800	2.18131e-05	0.000128075	6.26566e-05	MMP14/TMEM119/COL1A1/BMP4/MMP16	5
BP	GO:0033688	regulation of osteoblast proliferation	5/233	28/18800	2.18131e-05	0.000128075	6.26566e-05	SFRP1/GREM1/TMEM119/IGF1R/SMAD3	5
BP	GO:0036075	replacement ossification	5/233	28/18800	2.18131e-05	0.000128075	6.26566e-05	MMP14/TMEM119/COL1A1/BMP4/MMP16	5
BP	GO:0048873	homeostasis of number of cells within a tissue	5/233	28/18800	2.18131e-05	0.000128075	6.26566e-05	RAC3/IL7/BAX/CSF1/SOX9	5
BP	GO:0060512	prostate gland morphogenesis	5/233	28/18800	2.18131e-05	0.000128075	6.26566e-05	MMP2/SFRP1/BMP4/SULF1/SOX9	5
BP	GO:0009798	axis specification	8/233	94/18800	2.19788e-05	0.000128866	6.30435e-05	SFRP1/AXIN1/AXIN2/BMPR1A/BMP4/SMAD2/WNT6/CTNNB1	8
BP	GO:0071478	cellular response to radiation	11/233	187/18800	2.24638e-05	0.000131524	6.43439e-05	TIMP1/MMP2/TP53/SFRP1/BAX/CDKN1A/MYC/GADD45A/SNAI2/MMP9/MFAP4	11
BP	GO:0070527	platelet aggregation	7/233	69/18800	2.30479e-05	0.000134754	6.59241e-05	UBASH3B/PIK3CG/PDGFRA/FN1/ACTB/PDPN/ADAMTS18	7
BP	GO:0002819	regulation of adaptive immune response	11/233	188/18800	2.36032e-05	0.000137807	6.74178e-05	TGFB1/TNFAIP3/SOCS5/IL7R/JAK3/IL1R1/TRAF2/STAT6/PTPRC/TNF/TNFRSF1B	11
BP	GO:0070849	response to epidermal growth factor	6/233	47/18800	2.38571e-05	0.000139094	6.80473e-05	MAPK1/COL1A1/MYC/SNAI2/ID1/SOX9	6
BP	GO:0060441	epithelial tube branching involved in lung morphogenesis	5/233	29/18800	2.60926e-05	0.000151914	7.43193e-05	TNF/BMP4/CTNNB1/FOXF1/SOX9	5
BP	GO:0030195	negative regulation of blood coagulation	6/233	48/18800	2.69851e-05	0.000156672	7.66468e-05	UBASH3B/PDGFRA/THBS1/SERPINE1/SERPINF2/ADAMTS18	6
BP	GO:0048146	positive regulation of fibroblast proliferation	6/233	48/18800	2.69851e-05	0.000156672	7.66468e-05	PDGFRA/FN1/CDKN1A/PDGFRB/MYC/GAS6	6
BP	GO:0003206	cardiac chamber morphogenesis	9/233	126/18800	2.76956e-05	0.000160573	7.85552e-05	TGFB1/TP53/TGFB2/FZD1/FZD2/TGFBR2/BMPR1A/BMP4/FOXF1	9
BP	GO:0030032	lamellipodium assembly	7/233	71/18800	2.78199e-05	0.000160844	7.86882e-05	CDC42/S1PR1/RAC2/EPHA2/ITGB1/KIT/FSCN1	7
BP	GO:0060411	cardiac septum morphogenesis	7/233	71/18800	2.78199e-05	0.000160844	7.86882e-05	TP53/TGFB2/FZD1/FZD2/TGFBR2/BMPR1A/BMP4	7
BP	GO:0003413	chondrocyte differentiation involved in endochondral bone morphogenesis	4/233	15/18800	2.81916e-05	0.000161868	7.91889e-05	AXIN2/TGFBR2/COL27A1/SOX9	4
BP	GO:0010763	positive regulation of fibroblast migration	4/233	15/18800	2.81916e-05	0.000161868	7.91889e-05	PTK2/TGFB1/THBS1/ITGB1	4
BP	GO:0030852	regulation of granulocyte differentiation	4/233	15/18800	2.81916e-05	0.000161868	7.91889e-05	INPP5D/RUNX1/HCLS1/LEF1	4
BP	GO:0071380	cellular response to prostaglandin E stimulus	4/233	15/18800	2.81916e-05	0.000161868	7.91889e-05	SFRP1/GNB1/GNG2/PRKAA1	4
BP	GO:0150011	regulation of neuron projection arborization	4/233	15/18800	2.81916e-05	0.000161868	7.91889e-05	FZD4/DVL3/DLG4/DVL1	4
BP	GO:0070665	positive regulation of leukocyte proliferation	10/233	158/18800	2.84376e-05	0.000163055	7.97698e-05	MAPK1/PTK2/IL7/CSF1/CDKN1A/JAK3/IL2RA/PTPRC/CCL5/TGFBR2	10
BP	GO:0007265	Ras protein signal transduction	15/233	347/18800	3.00917e-05	0.000172302	8.42935e-05	CDC42/RAF1/RAC2/TP53/PIK3CG/LPAR1/ITGB1/GNB1/CSF1/CDKN1A/PDGFRB/ARRB1/TGFB2/PDPN/FLOT1	15
BP	GO:0002762	negative regulation of myeloid leukocyte differentiation	6/233	49/18800	3.04345e-05	0.000173548	8.49028e-05	GPR137B/INPP5D/SFRP1/UBASH3B/MYC/CTNNB1	6
BP	GO:0010862	positive regulation of pathway-restricted SMAD protein phosphorylation	6/233	49/18800	3.04345e-05	0.000173548	8.49028e-05	TGFB1/TGFB3/TGFB2/TGFBR2/BMPR1A/BMP4	6
BP	GO:1900047	negative regulation of hemostasis	6/233	49/18800	3.04345e-05	0.000173548	8.49028e-05	UBASH3B/PDGFRA/THBS1/SERPINE1/SERPINF2/ADAMTS18	6
BP	GO:0045671	negative regulation of osteoclast differentiation	5/233	30/18800	3.09965e-05	0.000176269	8.6234e-05	GPR137B/INPP5D/SFRP1/UBASH3B/CTNNB1	5
BP	GO:0140058	neuron projection arborization	5/233	30/18800	3.09965e-05	0.000176269	8.6234e-05	PTN/FZD4/DVL3/DLG4/DVL1	5
BP	GO:0050764	regulation of phagocytosis	8/233	99/18800	3.20571e-05	0.000182051	8.90627e-05	TGM2/SYT7/ITGA2/IL2RG/PTPRC/TNF/GAS6/PTX3	8
BP	GO:0051145	smooth muscle cell differentiation	7/233	73/18800	3.33767e-05	0.000188515	9.22252e-05	KIT/WNT4/BMP4/CTNNB1/FOXF1/EFEMP2/SOX9	7
BP	GO:0060415	muscle tissue morphogenesis	7/233	73/18800	3.33767e-05	0.000188515	9.22252e-05	TGFB1/S1PR1/TGFB2/FZD1/FZD2/BMPR1A/EFEMP2	7
BP	GO:0150076	neuroinflammatory response	7/233	73/18800	3.33767e-05	0.000188515	9.22252e-05	ITGB1/PTPRC/TNF/ITGB2/MMP9/LRP1/TNFRSF1B	7
BP	GO:2000573	positive regulation of DNA biosynthetic process	7/233	73/18800	3.33767e-05	0.000188515	9.22252e-05	MAPK1/PTK2B/GREM1/PDGFRB/MYC/TNF/CTNNB1	7
BP	GO:0110053	regulation of actin filament organization	13/233	270/18800	3.41443e-05	0.000192546	9.41972e-05	CDC42/S1PR1/PTK2B/TGFB3/SFRP1/LPAR1/HCLS1/WNT4/NF2/SMAD3/ID1/DLG1/SERPINF2	13
BP	GO:0043303	mast cell degranulation	6/233	50/18800	3.42294e-05	0.000192546	9.41972e-05	SPHK2/RAC2/PIK3CG/KIT/PIK3CD/FOXF1	6
BP	GO:2001238	positive regulation of extrinsic apoptotic signaling pathway	6/233	50/18800	3.42294e-05	0.000192546	9.41972e-05	SFRP1/THBS1/TRAF2/PTPRC/TNF/PPP2R1B	6
BP	GO:0014013	regulation of gliogenesis	8/233	100/18800	3.44771e-05	0.000193416	9.46229e-05	TGFB1/PTN/MYC/TNF/NF2/ID2/CTNNB1/TNFRSF1B	8
BP	GO:0042100	B cell proliferation	8/233	100/18800	3.44771e-05	0.000193416	9.46229e-05	INPP5D/IL7/BAX/IL7R/CD19/CDKN1A/PTPRC/LEF1	8
BP	GO:0030168	platelet activation	9/233	130/18800	3.54804e-05	0.000198776	9.72452e-05	UBASH3B/AXL/PIK3CG/PDGFRA/FN1/ACTB/FZD6/PDPN/ADAMTS18	9
BP	GO:0061311	cell surface receptor signaling pathway involved in heart development	5/233	31/18800	3.65861e-05	0.000204695	0.000100141	TGFB1/SNAI2/BMPR1A/BMP4/CTNNB1	5
BP	GO:0030307	positive regulation of cell growth	10/233	163/18800	3.71355e-05	0.000206595	0.00010107	CDC42/MMP14/PTK2B/SFRP1/LPAR3/FN1/RPS6KA3/TGFB2/TEAD1/HBEGF	10
BP	GO:0050680	negative regulation of epithelial cell proliferation	10/233	163/18800	3.71355e-05	0.000206595	0.00010107	TGFB1/SFRP1/THBS1/TGFB2/TNF/SNAI2/BMP4/DLG1/SULF1/SOX9	10
BP	GO:0010715	regulation of extracellular matrix disassembly	4/233	16/18800	3.72239e-05	0.000206595	0.00010107	TGFB1/PDPN/FSCN1/LRP1	4
BP	GO:0045651	positive regulation of macrophage differentiation	4/233	16/18800	3.72239e-05	0.000206595	0.00010107	TGFB1/CSF1/HCLS1/ID2	4
BP	GO:0051044	positive regulation of membrane protein ectodomain proteolysis	4/233	16/18800	3.72239e-05	0.000206595	0.00010107	ADAM8/TNF/TNFRSF1B/FURIN	4
BP	GO:1901201	regulation of extracellular matrix assembly	4/233	16/18800	3.72239e-05	0.000206595	0.00010107	TGFB1/SMAD3/ANTXR1/SOX9	4
BP	GO:0010595	positive regulation of endothelial cell migration	9/233	131/18800	3.76928e-05	0.000208918	0.000102207	TGFB1/PTK2B/FGFR1/PIK3CG/THBS1/ANGPT4/VEGFC/PIK3CD/BMP4	9
BP	GO:0043277	apoptotic cell clearance	6/233	51/18800	3.83949e-05	0.000211962	0.000103696	RAC2/TGM2/AXL/THBS1/GAS6/LRP1	6
BP	GO:0050982	detection of mechanical stimulus	6/233	51/18800	3.83949e-05	0.000211962	0.000103696	PTK2/ITGA2/KIT/TNF/FYN/CTNNB1	6
BP	GO:0072091	regulation of stem cell proliferation	6/233	51/18800	3.83949e-05	0.000211962	0.000103696	LTBP3/VEGFC/PTPRC/NF2/SNAI2/FBLN1	6
BP	GO:0035710	CD4-positive, alpha-beta T cell activation	8/233	102/18800	3.97772e-05	0.000219041	0.000107159	RUNX1/SOCS5/JAK3/RELB/STAT6/BCL3/LEF1/TGFBR2	8
BP	GO:0071230	cellular response to amino acid stimulus	7/233	75/18800	3.9815e-05	0.000219041	0.000107159	MMP2/PDGFRA/COL6A1/COL4A1/COL1A1/TNF/FYN	7
BP	GO:0022408	negative regulation of cell-cell adhesion	11/233	199/18800	3.98352e-05	0.000219041	0.000107159	PTK2/TGFB1/RUNX1/UBASH3B/SOCS5/JAK3/IL2RA/NF2/BMP4/DLG1/ADAMTS18	11
BP	GO:0051480	regulation of cytosolic calcium ion concentration	15/233	356/18800	4.0363e-05	0.00022165	0.000108435	S1PR1/PTK2B/UBASH3B/NOL3/BAX/LPAR3/PIK3CG/PDGFRA/LPAR1/CD19/JAK3/PTPRC/FYN/SMAD3/DLG4	15
BP	GO:0035282	segmentation	8/233	103/18800	4.26721e-05	0.000232215	0.000113604	TP53/SFRP1/LEF1/SMAD3/AXIN2/BMPR1A/BMP4/FOXF1	8
BP	GO:1903076	regulation of protein localization to plasma membrane	8/233	103/18800	4.26721e-05	0.000232215	0.000113604	MMP14/TGFB1/EPHA2/ITGB1/TNF/ACTB/DLG1/LRP1	8
BP	GO:0003180	aortic valve morphogenesis	5/233	32/18800	4.29259e-05	0.000232215	0.000113604	TGFB1/EFNA1/SNAI2/BMP4/SOX9	5
BP	GO:0060795	cell fate commitment involved in formation of primary germ layer	5/233	32/18800	4.29259e-05	0.000232215	0.000113604	FZD7/SMAD1/BMPR1A/BMP4/CTNNB1	5
BP	GO:0071353	cellular response to interleukin-4	5/233	32/18800	4.29259e-05	0.000232215	0.000113604	IL2RG/JAK3/STAT6/LEF1/TCF7	5
BP	GO:0071711	basement membrane organization	5/233	32/18800	4.29259e-05	0.000232215	0.000113604	COL4A1/ITGB1/CTSS/NID2/MMP11	5
BP	GO:0090183	regulation of kidney development	5/233	32/18800	4.29259e-05	0.000232215	0.000113604	GREM1/MYC/WNT4/BMP4/SOX9	5
BP	GO:0002279	mast cell activation involved in immune response	6/233	52/18800	4.29573e-05	0.000232215	0.000113604	SPHK2/RAC2/PIK3CG/KIT/PIK3CD/FOXF1	6
BP	GO:0002448	mast cell mediated immunity	6/233	52/18800	4.29573e-05	0.000232215	0.000113604	SPHK2/RAC2/PIK3CG/KIT/PIK3CD/FOXF1	6
BP	GO:0043525	positive regulation of neuron apoptotic process	6/233	52/18800	4.29573e-05	0.000232215	0.000113604	CDC42/TP53/BAX/TGFB2/TNF/CTNNB1	6
BP	GO:0050819	negative regulation of coagulation	6/233	52/18800	4.29573e-05	0.000232215	0.000113604	UBASH3B/PDGFRA/THBS1/SERPINE1/SERPINF2/ADAMTS18	6
BP	GO:1904036	negative regulation of epithelial cell apoptotic process	6/233	52/18800	4.29573e-05	0.000232215	0.000113604	TNFAIP3/PRKAA1/IGF1R/SERPINE1/TCF7L2/GAS6	6
BP	GO:0001959	regulation of cytokine-mediated signaling pathway	10/233	166/18800	4.33747e-05	0.000233983	0.000114469	TNFAIP3/IL7/NOL3/AXL/CSF1/IL1R1/TRAF2/PTPRC/CCL5/GAS6	10
BP	GO:0043299	leukocyte degranulation	7/233	76/18800	4.3397e-05	0.000233983	0.000114469	SPHK2/RAC2/PIK3CG/KIT/PIK3CD/ITGB2/FOXF1	7
BP	GO:0002285	lymphocyte activation involved in immune response	11/233	201/18800	4.36407e-05	0.000234993	0.000114963	TGFB1/PTK2B/TP53/SOCS5/CD19/JAK3/RELB/STAT6/PTPRC/BCL3/LEF1	11
BP	GO:0031667	response to nutrient levels	17/233	446/18800	4.39134e-05	0.000236155	0.000115532	MAPK1/PDK4/TP53/SFRP1/SPP1/COL1A1/ITGA2/CDKN1A/PRKAA1/IGF1R/MAX/TNF/WNT4/SNAI2/TGFBR2/CCND1/GAS6	17
BP	GO:0001889	liver development	9/233	134/18800	4.5043e-05	0.000241917	0.000118351	PTN/TNFAIP3/ITGA2/MYC/TNF/WNT4/SMAD3/CCND1/SOX9	9
BP	GO:0003205	cardiac chamber development	10/233	167/18800	4.5644e-05	0.000244828	0.000119775	TGFB1/TP53/IGF1R/TGFB2/FZD1/FZD2/TGFBR2/BMPR1A/BMP4/FOXF1	10
BP	GO:0014812	muscle cell migration	8/233	104/18800	4.57408e-05	0.000245032	0.000119874	THBS4/ITGA2/PDGFRB/MYC/CCL5/SERPINE1/BMPR1A/LRP1	8
BP	GO:0051149	positive regulation of muscle cell differentiation	7/233	77/18800	4.7239e-05	0.000252732	0.000123641	MAPK12/MMP14/TGFB1/GREM1/KIT/BMP4/EFEMP2	7
BP	GO:0031331	positive regulation of cellular catabolic process	17/233	449/18800	4.77242e-05	0.000255	0.000124751	PTK2/PTK2B/TNFAIP3/ADAM8/BAX/SOCS5/TSC2/BAD/MYC/PRKAA1/TNF/AXIN1/CSNK1D/DVL1/LRP1/TNFRSF1B/FURIN	17
BP	GO:0002544	chronic inflammatory response	4/233	17/18800	4.82051e-05	0.000255924	0.000125203	TNFAIP3/THBS1/CCL5/TNF	4
BP	GO:0033631	cell-cell adhesion mediated by integrin	4/233	17/18800	4.82051e-05	0.000255924	0.000125203	ITGB1/ITGA4/ITGA5/CCL5	4
BP	GO:0038065	collagen-activated signaling pathway	4/233	17/18800	4.82051e-05	0.000255924	0.000125203	UBASH3B/COL4A1/COL1A1/ITGA2	4
BP	GO:0070230	positive regulation of lymphocyte apoptotic process	4/233	17/18800	4.82051e-05	0.000255924	0.000125203	TP53/ADAM8/BAX/CCL5	4
BP	GO:1904948	midbrain dopaminergic neuron differentiation	4/233	17/18800	4.82051e-05	0.000255924	0.000125203	SFRP1/CSNK1D/FZD1/CTNNB1	4
BP	GO:0007015	actin filament organization	17/233	450/18800	4.9058e-05	0.00026012	0.000127256	CDC42/RAC3/S1PR1/RAC2/PTK2B/TGFB3/SFRP1/LPAR1/ARRB1/HCLS1/WNT4/NF2/SMAD3/ID1/DLG1/SERPINF2/FSCN1	17
BP	GO:0051402	neuron apoptotic process	12/233	241/18800	4.95544e-05	0.000262417	0.00012838	CDC42/PTK2B/TGFB3/TP53/ADAM8/AXL/BAX/ERBB3/TGFB2/MAX/TNF/CTNNB1	12
BP	GO:0033687	osteoblast proliferation	5/233	33/18800	5.00833e-05	0.000264208	0.000129256	SFRP1/GREM1/TMEM119/IGF1R/SMAD3	5
BP	GO:0048566	embryonic digestive tract development	5/233	33/18800	5.00833e-05	0.000264208	0.000129256	PDGFRA/TGFB2/TNF/ID2/FOXF1	5
BP	GO:0070229	negative regulation of lymphocyte apoptotic process	5/233	33/18800	5.00833e-05	0.000264208	0.000129256	IL7R/EFNA1/JAK3/CCL5/BMP4	5
BP	GO:0030593	neutrophil chemotaxis	8/233	106/18800	5.24321e-05	0.000276249	0.000135146	RAC2/CSF3R/PIK3CG/THBS4/PIK3CD/TGFB2/CCL5/ITGB2	8
BP	GO:0061008	hepaticobiliary system development	9/233	137/18800	5.35693e-05	0.000281883	0.000137903	PTN/TNFAIP3/ITGA2/MYC/TNF/WNT4/SMAD3/CCND1/SOX9	9
BP	GO:0016485	protein processing	12/233	243/18800	5.36718e-05	0.000282065	0.000137992	MMP14/ADAM8/RUNX1/NOL3/THBS1/BAD/SERPINE1/CTSS/MMP16/SERPINF2/ANXA2/FURIN	12
BP	GO:0009895	negative regulation of catabolic process	14/233	324/18800	5.57444e-05	0.000292318	0.000143007	TIMP1/TP53/TSC2/PIK3CG/EFNA1/PRKAA1/TRAF2/TNF/IL10RA/FYN/SMAD3/AXIN2/ANXA2/FURIN	14
BP	GO:0051099	positive regulation of binding	10/233	171/18800	5.57632e-05	0.000292318	0.000143007	TGFB1/ITGA2/MYC/BMP4/TCF7L2/CTNNB1/MMP9/FLOT1/LRP1/ANXA2	10
BP	GO:0033209	tumor necrosis factor-mediated signaling pathway	8/233	107/18800	5.60719e-05	0.000293565	0.000143618	PTK2B/TNFAIP3/TP53/NOL3/TRAF2/TNF/GAS6/TNFRSF1B	8
BP	GO:0043523	regulation of neuron apoptotic process	11/233	207/18800	5.69935e-05	0.000298015	0.000145795	CDC42/PTK2B/TGFB3/TP53/ADAM8/AXL/BAX/ERBB3/TGFB2/TNF/CTNNB1	11
BP	GO:0007204	positive regulation of cytosolic calcium ion concentration	14/233	325/18800	5.76223e-05	0.000300925	0.000147218	S1PR1/PTK2B/UBASH3B/NOL3/BAX/LPAR3/PIK3CG/PDGFRA/LPAR1/CD19/JAK3/PTPRC/FYN/DLG4	14
BP	GO:0034405	response to fluid shear stress	5/233	34/18800	5.8129e-05	0.000301676	0.000147586	PTK2B/TGFB3/MMP2/SOCS5/PDGFRB	5
BP	GO:0070670	response to interleukin-4	5/233	34/18800	5.8129e-05	0.000301676	0.000147586	IL2RG/JAK3/STAT6/LEF1/TCF7	5
BP	GO:0110110	positive regulation of animal organ morphogenesis	5/233	34/18800	5.8129e-05	0.000301676	0.000147586	CSF1/WNT4/BMP4/CTNNB1/SOX9	5
BP	GO:1902692	regulation of neuroblast proliferation	5/233	34/18800	5.8129e-05	0.000301676	0.000147586	PTN/TP53/VEGFC/FZD3/CTNNB1	5
BP	GO:1904893	negative regulation of STAT cascade	5/233	34/18800	5.8129e-05	0.000301676	0.000147586	SOCS2/INPP5F/BCL3/SOCS3/NF2	5
BP	GO:0001954	positive regulation of cell-matrix adhesion	6/233	55/18800	5.93051e-05	0.000306631	0.00015001	PTK2B/SFRP1/CSF1/WNT4/SMAD3/EFEMP2	6
BP	GO:0010518	positive regulation of phospholipase activity	6/233	55/18800	5.93051e-05	0.000306631	0.00015001	FGFR1/PDGFRA/LPAR1/KIT/PDGFRB/CCL5	6
BP	GO:0045620	negative regulation of lymphocyte differentiation	6/233	55/18800	5.93051e-05	0.000306631	0.00015001	SFRP1/RUNX1/SOCS5/JAK3/BMP4/ID2	6
BP	GO:0030100	regulation of endocytosis	11/233	208/18800	5.95294e-05	0.000307409	0.00015039	CDC42/GREM1/AXL/TSC2/ITGA2/ARRB1/SERPINE1/DLG4/FLOT1/LRP1/ANXA2	11
BP	GO:0007173	epidermal growth factor receptor signaling pathway	8/233	108/18800	5.99195e-05	0.000308962	0.00015115	PTK2/TGFB1/PTK2B/SHC1/SOCS5/MMP9/SOX9/HBEGF	8
BP	GO:0019827	stem cell population maintenance	9/233	139/18800	5.9979e-05	0.000308962	0.00015115	RAF1/PTN/SFRP1/KIT/MYC/FZD7/BMPR1A/CTNNB1/SOX9	9
BP	GO:0006898	receptor-mediated endocytosis	12/233	246/18800	6.0402e-05	0.000310344	0.000151826	GREM1/ITGB1/ITGA4/ARRB1/INPP5F/ITGB2/SERPINE1/DLG4/TGFBR2/FLOT1/LRP1/ANXA2	12
BP	GO:0071695	anatomical structure maturation	12/233	246/18800	6.0402e-05	0.000310344	0.000151826	RAC3/S1PR1/PTK2B/MMP2/GREM1/AXL/PTH1R/THBS3/TGFB2/AKR1B1/CTNNB1/ADAMTS7	12
BP	GO:0048644	muscle organ morphogenesis	7/233	80/18800	6.04712e-05	0.000310344	0.000151826	TGFB1/S1PR1/TGFB2/FZD1/FZD2/BMPR1A/EFEMP2	7
BP	GO:0030903	notochord development	4/233	18/18800	6.13768e-05	0.000313829	0.000153531	EPHA2/EFNA1/TEAD2/SOX9	4
BP	GO:0060391	positive regulation of SMAD protein signal transduction	4/233	18/18800	6.13768e-05	0.000313829	0.000153531	TGFB1/TGFB3/BMPR1A/BMP4	4
BP	GO:0097094	craniofacial suture morphogenesis	4/233	18/18800	6.13768e-05	0.000313829	0.000153531	MMP14/TGFB3/BMP4/MMP16	4
BP	GO:0010469	regulation of signaling receptor activity	10/233	173/18800	6.15012e-05	0.000314079	0.000153654	PTK2B/CAPN1/GREM1/SHC1/SOCS5/ITGB1/TNF/SERPINE1/DLG4/HBEGF	10
BP	GO:1901215	negative regulation of neuron death	11/233	209/18800	6.21616e-05	0.000317062	0.000155113	PTK2B/TGFB3/ADAM8/AXL/BAX/ERBB3/CSF1/TRAF2/FZD1/CTNNB1/TNFRSF1B	11
BP	GO:0042129	regulation of T cell proliferation	10/233	174/18800	6.45538e-05	0.00032886	0.000160885	RAC2/JAK3/IL2RA/PTPRC/CCL5/TGFBR2/BMP4/DLG1/CTNNB1/TNFRSF1B	10
BP	GO:0002699	positive regulation of immune effector process	12/233	248/18800	6.52835e-05	0.000332171	0.000162504	SPHK2/TGFB1/RAC2/SOCS5/KIT/IL1R1/TRAF2/STAT6/PTPRC/TNF/ITGB2/FOXF1	12
BP	GO:0031016	pancreas development	7/233	81/18800	6.55018e-05	0.000332468	0.00016265	BAD/BMP4/SMAD2/TCF7L2/CTNNB1/FOXF1/SOX9	7
BP	GO:0045445	myoblast differentiation	7/233	81/18800	6.55018e-05	0.000332468	0.00016265	MAPK12/TGFB1/ITGB1/TNF/BMP4/TCF7L2/SOX9	7
BP	GO:0001836	release of cytochrome c from mitochondria	6/233	56/18800	6.57402e-05	0.000332865	0.000162844	TP53/NOL3/BAX/BAD/BBC3/MMP9	6
BP	GO:0010332	response to gamma radiation	6/233	56/18800	6.57402e-05	0.000332865	0.000162844	TP53/BAX/CDKN1A/MYC/PRKAA1/PTPRC	6
BP	GO:0038061	NIK/NF-kappaB signaling	9/233	141/18800	6.70231e-05	0.000338536	0.000165618	GREM1/NOL3/TRAF2/PPM1B/RELB/TNF/BCL3/NMI/NFKB2	9
BP	GO:0098727	maintenance of cell number	9/233	141/18800	6.70231e-05	0.000338536	0.000165618	RAF1/PTN/SFRP1/KIT/MYC/FZD7/BMPR1A/CTNNB1/SOX9	9
BP	GO:1905207	regulation of cardiocyte differentiation	5/233	35/18800	6.71367e-05	0.000338698	0.000165698	TGFB1/GREM1/TGFB2/FZD7/BMP4	5
BP	GO:0035107	appendage morphogenesis	9/233	142/18800	7.07985e-05	0.000356231	0.000174275	GREM1/BAX/TGFB2/LEF1/BMPR1A/BMP4/FZD6/CTNNB1/SOX9	9
BP	GO:0035108	limb morphogenesis	9/233	142/18800	7.07985e-05	0.000356231	0.000174275	GREM1/BAX/TGFB2/LEF1/BMPR1A/BMP4/FZD6/CTNNB1/SOX9	9
BP	GO:0043367	CD4-positive, alpha-beta T cell differentiation	7/233	82/18800	7.08692e-05	0.000356231	0.000174275	RUNX1/SOCS5/JAK3/RELB/STAT6/BCL3/LEF1	7
BP	GO:0050808	synapse organization	16/233	419/18800	7.22589e-05	0.000362778	0.000177478	CDC42/COL4A1/EFNA1/THBS2/IGF1R/TNF/IL10RA/FYN/YWHAZ/FZD1/WNT7B/DLG4/ACTB/DVL1/DLG1/CTNNB1	16
BP	GO:0001961	positive regulation of cytokine-mediated signaling pathway	6/233	57/18800	7.27207e-05	0.000364632	0.000178385	IL7/AXL/CSF1/IL1R1/TRAF2/GAS6	6
BP	GO:0046632	alpha-beta T cell differentiation	8/233	111/18800	7.28037e-05	0.000364632	0.000178385	RUNX1/SOCS5/JAK3/RELB/STAT6/BCL3/LEF1/TGFBR2	8
BP	GO:0006470	protein dephosphorylation	13/233	291/18800	7.35101e-05	0.000367727	0.000179899	TGFB1/UBASH3B/PPP2R2B/PDGFRB/PPM1B/PTPN7/DUSP1/PTPRC/TNF/FBXW11/PPP2R1B/DLG1/PPP1CB	13
BP	GO:0031669	cellular response to nutrient levels	11/233	213/18800	7.3714e-05	0.000368304	0.000180181	MAPK1/PDK4/TP53/SFRP1/COL1A1/CDKN1A/PRKAA1/MAX/WNT4/SNAI2/GAS6	11
BP	GO:0030010	establishment of cell polarity	9/233	143/18800	7.47512e-05	0.000372591	0.000182279	CDC42/PTK2/PTK2B/ITGB1/IGF1R/FBXW11/PATJ/FOXF1/FSCN1	9
BP	GO:0061351	neural precursor cell proliferation	9/233	143/18800	7.47512e-05	0.000372591	0.000182279	PTN/TP53/VEGFC/NF2/LEF1/ID2/FZD3/FZD6/CTNNB1	9
BP	GO:0030900	forebrain development	15/233	376/18800	7.48537e-05	0.000372655	0.00018231	RAC3/AXL/BAX/BAD/MYC/IGF1R/FYN/WNT4/NF2/LEF1/WNT7B/BMPR1A/BMP4/ID2/CTNNB1	15
BP	GO:0014910	regulation of smooth muscle cell migration	7/233	83/18800	7.65905e-05	0.000379653	0.000185734	ITGA2/PDGFRB/MYC/CCL5/SERPINE1/BMPR1A/LRP1	7
BP	GO:0048678	response to axon injury	7/233	83/18800	7.65905e-05	0.000379653	0.000185734	PTN/MMP2/BAX/SPP1/IGF1R/MAX/INPP5F	7
BP	GO:0003417	growth plate cartilage development	4/233	19/18800	7.69901e-05	0.000379653	0.000185734	THBS3/TGFBR2/COL27A1/SOX9	4
BP	GO:0055093	response to hyperoxia	4/233	19/18800	7.69901e-05	0.000379653	0.000185734	MMP2/COL1A1/PDGFRB/PDPN	4
BP	GO:0061298	retina vasculature development in camera-type eye	4/233	19/18800	7.69901e-05	0.000379653	0.000185734	PDGFRA/COL4A1/PDGFRB/FZD4	4
BP	GO:0072074	kidney mesenchyme development	4/233	19/18800	7.69901e-05	0.000379653	0.000185734	PDGFRB/MYC/WNT4/BMP4	4
BP	GO:0072079	nephron tubule formation	4/233	19/18800	7.69901e-05	0.000379653	0.000185734	GREM1/WNT6/CTNNB1/SOX9	4
BP	GO:2000269	regulation of fibroblast apoptotic process	4/233	19/18800	7.69901e-05	0.000379653	0.000185734	TP53/SFRP1/PIK3CG/GAS6	4
BP	GO:0060428	lung epithelium development	5/233	36/18800	7.71831e-05	0.000380154	0.000185979	CDC42/FGF7/WNT7B/BMP4/SOX9	5
BP	GO:0001936	regulation of endothelial cell proliferation	10/233	178/18800	7.80874e-05	0.000383699	0.000187713	FGFR1/THBS4/THBS1/ITGA4/VEGFC/VEGFB/PIK3CD/TNF/BMP4/SULF1	10
BP	GO:0060759	regulation of response to cytokine stimulus	10/233	178/18800	7.80874e-05	0.000383699	0.000187713	TNFAIP3/IL7/NOL3/AXL/CSF1/IL1R1/TRAF2/PTPRC/CCL5/GAS6	10
BP	GO:0050732	negative regulation of peptidyl-tyrosine phosphorylation	6/233	58/18800	8.02796e-05	0.000393077	0.000192301	SFRP1/SOCS5/PTPRC/INPP5F/SOCS3/NF2	6
BP	GO:0061005	cell differentiation involved in kidney development	6/233	58/18800	8.02796e-05	0.000393077	0.000192301	GREM1/WWTR1/WNT4/BMP4/CTNNB1/MMP9	6
BP	GO:0090303	positive regulation of wound healing	6/233	58/18800	8.02796e-05	0.000393077	0.000192301	PTK2/THBS1/ITGB1/SERPINE1/SERPINF2/HBEGF	6
BP	GO:0071375	cellular response to peptide hormone stimulus	13/233	294/18800	8.15292e-05	0.000398726	0.000195064	PTK2/PDK4/SHC1/SOCS2/TSC2/JAK3/MYC/PRKAA1/IGF1R/MAX/STAT6/SOCS3/PRKCB	13
BP	GO:0043409	negative regulation of MAPK cascade	10/233	179/18800	8.18242e-05	0.000399698	0.00019554	SFRP1/EFNA1/MYC/IGF1R/DUSP1/PTPRC/NF2/BMP4/DLG1/FBLN1	10
BP	GO:0031623	receptor internalization	8/233	113/18800	8.26097e-05	0.000403062	0.000197186	GREM1/ITGB1/ARRB1/ITGB2/DLG4/FLOT1/LRP1/ANXA2	8
BP	GO:0006816	calcium ion transport	16/233	424/18800	8.30018e-05	0.0004045	0.000197889	SPHK2/PTK2B/UBASH3B/NOL3/BAX/PIK3CG/CD19/PDGFRB/JAK3/PTPRC/CCL5/FYN/CTNNB1/GAS6/ANXA2/PRKCB	16
BP	GO:0043588	skin development	13/233	296/18800	8.72871e-05	0.000424886	0.000207862	EPHA2/ITGB4/ITGA6/COL1A1/FGF7/ITGA2/LAMA5/TGFB2/TNF/FZD3/FZD6/CTNNB1/SOX9	13
BP	GO:0042303	molting cycle	8/233	114/18800	8.79089e-05	0.000426913	0.000208854	FGF7/LAMA5/TGFB2/TNF/FZD3/FZD6/CTNNB1/SOX9	8
BP	GO:0042633	hair cycle	8/233	114/18800	8.79089e-05	0.000426913	0.000208854	FGF7/LAMA5/TGFB2/TNF/FZD3/FZD6/CTNNB1/SOX9	8
BP	GO:0003161	cardiac conduction system development	5/233	37/18800	8.83479e-05	0.000427053	0.000208923	CDC42/SMAD1/BMPR1A/BMP4/ID2	5
BP	GO:0003203	endocardial cushion morphogenesis	5/233	37/18800	8.83479e-05	0.000427053	0.000208923	TGFB2/SNAI2/TGFBR2/BMPR1A/SOX9	5
BP	GO:0030279	negative regulation of ossification	5/233	37/18800	8.83479e-05	0.000427053	0.000208923	PTK2B/SFRP1/LTBP3/GREM1/SOX9	5
BP	GO:0045599	negative regulation of fat cell differentiation	6/233	59/18800	8.84515e-05	0.000427053	0.000208923	TGFB1/TNF/AXIN1/WWTR1/SMAD3/MMP11	6
BP	GO:2000351	regulation of endothelial cell apoptotic process	6/233	59/18800	8.84515e-05	0.000427053	0.000208923	TNFAIP3/THBS1/ITGA4/TNF/SERPINE1/GAS6	6
BP	GO:0008543	fibroblast growth factor receptor signaling pathway	7/233	85/18800	8.91652e-05	0.000429501	0.00021012	FGFR1/THBS1/FGF7/WNT4/CTNNB1/SULF1/SULF2	7
BP	GO:2000177	regulation of neural precursor cell proliferation	7/233	85/18800	8.91652e-05	0.000429501	0.00021012	PTN/TP53/VEGFC/NF2/ID2/FZD3/CTNNB1	7
BP	GO:0050728	negative regulation of inflammatory response	10/233	182/18800	9.39583e-05	0.000452066	0.000221159	TNFAIP3/SOCS5/IL2RA/PTPRC/FYN/SOCS3/SMAD3/FOXF1/TNFRSF1B/FURIN	10
BP	GO:0043583	ear development	11/233	219/18800	9.44723e-05	0.000454013	0.000222112	MAPK1/TGFB3/PDGFRB/TGFB2/FZD2/BMP4/FZD3/DVL1/FZD6/MPV17/SOX9	11
BP	GO:0071379	cellular response to prostaglandin stimulus	4/233	20/18800	9.53049e-05	0.000456431	0.000223295	SFRP1/GNB1/GNG2/PRKAA1	4
BP	GO:0072170	metanephric tubule development	4/233	20/18800	9.53049e-05	0.000456431	0.000223295	WWTR1/WNT4/WNT7B/SOX9	4
BP	GO:2000738	positive regulation of stem cell differentiation	4/233	20/18800	9.53049e-05	0.000456431	0.000223295	PTN/LTBP3/TGFB2/SOX9	4
BP	GO:1904705	regulation of vascular smooth muscle cell proliferation	7/233	86/18800	9.60553e-05	0.000459496	0.000224794	TGFB3/MMP2/CDKN1A/TNF/BMPR1A/MMP9/EFEMP2	7
BP	GO:0002701	negative regulation of production of molecular mediator of immune response	5/233	38/18800	0.000100714	0.000480124	0.000234886	TGFB1/TGFB3/JAK3/TGFB2/TNF	5
BP	GO:0040036	regulation of fibroblast growth factor receptor signaling pathway	5/233	38/18800	0.000100714	0.000480124	0.000234886	THBS1/WNT4/CTNNB1/SULF1/SULF2	5
BP	GO:0060416	response to growth hormone	5/233	38/18800	0.000100714	0.000480124	0.000234886	PTK2/SOCS2/JAK3/MYC/STAT6	5
BP	GO:0060041	retina development in camera-type eye	9/233	149/18800	0.000102574	0.000488432	0.00023895	BAX/PDGFRA/COL4A1/GNB1/PDGFRB/TGFB2/MAX/FZD4/SOX9	9
BP	GO:1990874	vascular smooth muscle cell proliferation	7/233	87/18800	0.000103373	0.000491671	0.000240535	TGFB3/MMP2/CDKN1A/TNF/BMPR1A/MMP9/EFEMP2	7
BP	GO:0007405	neuroblast proliferation	6/233	61/18800	0.000106778	0.000507285	0.000248174	PTN/TP53/VEGFC/LEF1/FZD3/CTNNB1	6
BP	GO:0007584	response to nutrient	9/233	150/18800	0.000107963	0.000512333	0.000250643	SFRP1/SPP1/COL1A1/ITGA2/IGF1R/SNAI2/TGFBR2/CCND1/GAS6	9
BP	GO:0030308	negative regulation of cell growth	10/233	186/18800	0.000112483	0.000533172	0.000260838	SPHK2/TGFB1/TP53/SFRP1/GREM1/SPP1/CDKN1A/TGFB2/CRLF3/SMAD3	10
BP	GO:0002764	immune response-regulating signaling pathway	17/233	482/18800	0.000113434	0.000537067	0.000262744	MAPK1/PTK2/TNFAIP3/INPP5D/BAX/CD19/PIK3AP1/KIT/PIK3CD/RPS6KA3/PTPRC/TNF/FYN/NMI/CTSS/FLOT1/PRKCB	17
BP	GO:0030502	negative regulation of bone mineralization	4/233	21/18800	0.000116589	0.000550125	0.000269132	PTK2B/LTBP3/GREM1/SOX9	4
BP	GO:0060973	cell migration involved in heart development	4/233	21/18800	0.000116589	0.000550125	0.000269132	CDC42/PDGFRB/SNAI2/BMP4	4
BP	GO:1905209	positive regulation of cardiocyte differentiation	4/233	21/18800	0.000116589	0.000550125	0.000269132	TGFB1/GREM1/TGFB2/BMP4	4
BP	GO:2000736	regulation of stem cell differentiation	6/233	62/18800	0.000117007	0.00055147	0.00026979	PTN/LTBP3/PDGFRA/TGFB2/TEAD2/SOX9	6
BP	GO:0030326	embryonic limb morphogenesis	8/233	119/18800	0.000118816	0.000558101	0.000273034	GREM1/BAX/TGFB2/LEF1/BMPR1A/BMP4/FZD6/CTNNB1	8
BP	GO:0035113	embryonic appendage morphogenesis	8/233	119/18800	0.000118816	0.000558101	0.000273034	GREM1/BAX/TGFB2/LEF1/BMPR1A/BMP4/FZD6/CTNNB1	8
BP	GO:0045471	response to ethanol	8/233	119/18800	0.000118816	0.000558101	0.000273034	PTK2B/BAD/MYC/PRKAA1/IGF1R/TNF/FYN/CCND1	8
BP	GO:0010863	positive regulation of phospholipase C activity	5/233	40/18800	0.000129395	0.000606422	0.000296673	FGFR1/PDGFRA/LPAR1/KIT/PDGFRB	5
BP	GO:0035329	hippo signaling	5/233	40/18800	0.000129395	0.000606422	0.000296673	WWTR1/NF2/TEAD2/TEAD1/MOB1B	5
BP	GO:0051101	regulation of DNA binding	8/233	121/18800	0.000133462	0.000623374	0.000304967	TGFB1/ITGA2/MYC/BCL3/LEF1/ID1/CTNNB1/MMP9	8
BP	GO:0055007	cardiac muscle cell differentiation	8/233	121/18800	0.000133462	0.000623374	0.000304967	TGFB1/GREM1/PDGFRA/ITGB1/PDGFRB/FZD7/BMPR1A/BMP4	8
BP	GO:0071482	cellular response to light stimulus	8/233	121/18800	0.000133462	0.000623374	0.000304967	TIMP1/MMP2/TP53/BAX/CDKN1A/MYC/MMP9/MFAP4	8
BP	GO:0031348	negative regulation of defense response	12/233	268/18800	0.000136075	0.000634865	0.000310588	TNFAIP3/SOCS5/IL2RA/PPM1B/PTPRC/FYN/NMI/SOCS3/SMAD3/FOXF1/TNFRSF1B/FURIN	12
BP	GO:0014909	smooth muscle cell migration	7/233	91/18800	0.00013732	0.00063924	0.000312728	ITGA2/PDGFRB/MYC/CCL5/SERPINE1/BMPR1A/LRP1	7
BP	GO:0045638	negative regulation of myeloid cell differentiation	7/233	91/18800	0.00013732	0.00063924	0.000312728	PTK2B/GPR137B/INPP5D/SFRP1/UBASH3B/MYC/CTNNB1	7
BP	GO:0014015	positive regulation of gliogenesis	6/233	64/18800	0.000139793	0.000648569	0.000317292	TGFB1/PTN/MYC/TNF/ID2/TNFRSF1B	6
BP	GO:0048247	lymphocyte chemotaxis	6/233	64/18800	0.000139793	0.000648569	0.000317292	PTK2B/ADAM8/PIK3CG/PIK3CD/CCL5/GAS6	6
BP	GO:0060760	positive regulation of response to cytokine stimulus	6/233	64/18800	0.000139793	0.000648569	0.000317292	IL7/AXL/CSF1/IL1R1/TRAF2/GAS6	6
BP	GO:0023019	signal transduction involved in regulation of gene expression	4/233	22/18800	0.000141117	0.000651806	0.000318876	PDGFRA/TRAF2/SMAD3/SMAD2	4
BP	GO:0035089	establishment of apical/basal cell polarity	4/233	22/18800	0.000141117	0.000651806	0.000318876	CDC42/PATJ/FOXF1/FSCN1	4
BP	GO:1903798	regulation of production of miRNAs involved in gene silencing by miRNA	4/233	22/18800	0.000141117	0.000651806	0.000318876	TGFB1/TP53/TNF/BMP4	4
BP	GO:2000725	regulation of cardiac muscle cell differentiation	4/233	22/18800	0.000141117	0.000651806	0.000318876	TGFB1/GREM1/FZD7/BMP4	4
BP	GO:0033574	response to testosterone	5/233	41/18800	0.000145891	0.000672183	0.000328845	SPP1/THBS1/BAD/MYC/IGF1R	5
BP	GO:1902742	apoptotic process involved in development	5/233	41/18800	0.000145891	0.000672183	0.000328845	BAX/TGFB2/LEF1/PPP2R1B/TNFRSF1B	5
BP	GO:0048839	inner ear development	10/233	192/18800	0.000146014	0.000672183	0.000328845	TGFB3/PDGFRB/TGFB2/FZD2/BMP4/FZD3/DVL1/FZD6/MPV17/SOX9	10
BP	GO:0042093	T-helper cell differentiation	6/233	65/18800	0.000152431	0.000699401	0.00034216	SOCS5/JAK3/RELB/STAT6/BCL3/LEF1	6
BP	GO:0045576	mast cell activation	6/233	65/18800	0.000152431	0.000699401	0.00034216	SPHK2/RAC2/PIK3CG/KIT/PIK3CD/FOXF1	6
BP	GO:0072577	endothelial cell apoptotic process	6/233	65/18800	0.000152431	0.000699401	0.00034216	TNFAIP3/THBS1/ITGA4/TNF/SERPINE1/GAS6	6
BP	GO:1904375	regulation of protein localization to cell periphery	8/233	124/18800	0.0001582	0.000725071	0.000354719	MMP14/TGFB1/EPHA2/ITGB1/TNF/ACTB/DLG1/LRP1	8
BP	GO:0071897	DNA biosynthetic process	10/233	194/18800	0.000158915	0.000727542	0.000355927	MAPK1/PTK2B/TP53/GREM1/CDKN1A/PDGFRB/MYC/TNF/CTNNB1/LOX	10
BP	GO:0010817	regulation of hormone levels	17/233	496/18800	0.000159644	0.000730079	0.000357169	RAF1/CTSK/SFRP1/SYT7/SPP1/PDGFRA/BAD/GNB3/IGF1R/AKR1B1/CCL5/TNF/WNT4/FZD4/SMAD2/TCF7L2/FURIN	17
BP	GO:0046631	alpha-beta T cell activation	9/233	158/18800	0.000160248	0.000732035	0.000358125	RUNX1/SOCS5/JAK3/RELB/STAT6/PTPRC/BCL3/LEF1/TGFBR2	9
BP	GO:1900274	regulation of phospholipase C activity	5/233	42/18800	0.000163947	0.000748109	0.000365989	FGFR1/PDGFRA/LPAR1/KIT/PDGFRB	5
BP	GO:0043434	response to peptide hormone	15/233	404/18800	0.00016521	0.000753046	0.000368405	PTK2/TIMP1/PDK4/SHC1/SOCS2/TSC2/COL1A1/JAK3/MYC/PRKAA1/IGF1R/MAX/STAT6/SOCS3/PRKCB	15
BP	GO:0030193	regulation of blood coagulation	6/233	66/18800	0.000165958	0.000755625	0.000369666	UBASH3B/PDGFRA/THBS1/SERPINE1/SERPINF2/ADAMTS18	6
BP	GO:0010893	positive regulation of steroid biosynthetic process	4/233	23/18800	0.000169173	0.000766769	0.000375118	PRKAA1/IGF1R/TNF/WNT4	4
BP	GO:0034695	response to prostaglandin E	4/233	23/18800	0.000169173	0.000766769	0.000375118	SFRP1/GNB1/GNG2/PRKAA1	4
BP	GO:0035988	chondrocyte proliferation	4/233	23/18800	0.000169173	0.000766769	0.000375118	MMP14/LEF1/MMP16/SOX9	4
BP	GO:0070920	regulation of production of small RNA involved in gene silencing by RNA	4/233	23/18800	0.000169173	0.000766769	0.000375118	TGFB1/TP53/TNF/BMP4	4
BP	GO:0007411	axon guidance	11/233	234/18800	0.000169327	0.000766769	0.000375118	PTK2/RAC2/EPHA2/LAMA3/EFNA4/LAMC2/EFNA1/LAMA5/FYN/FZD3/DVL1	11
BP	GO:0097485	neuron projection guidance	11/233	235/18800	0.000175737	0.000794929	0.000388895	PTK2/RAC2/EPHA2/LAMA3/EFNA4/LAMC2/EFNA1/LAMA5/FYN/FZD3/DVL1	11
BP	GO:0002262	myeloid cell homeostasis	9/233	160/18800	0.00017619	0.000795248	0.000389051	INPP5D/AXL/BAX/KIT/JAK3/PIK3CD/HCLS1/BMP4/ID2	9
BP	GO:0009267	cellular response to starvation	9/233	160/18800	0.00017619	0.000795248	0.000389051	MAPK1/PDK4/TP53/SFRP1/CDKN1A/PRKAA1/MAX/WNT4/GAS6	9
BP	GO:0003231	cardiac ventricle development	8/233	126/18800	0.000176701	0.000796687	0.000389755	TGFB1/TGFB2/FZD1/FZD2/TGFBR2/BMPR1A/BMP4/FOXF1	8
BP	GO:0002294	CD4-positive, alpha-beta T cell differentiation involved in immune response	6/233	67/18800	0.000180415	0.000812553	0.000397517	SOCS5/JAK3/RELB/STAT6/BCL3/LEF1	6
BP	GO:0035019	somatic stem cell population maintenance	5/233	43/18800	0.000183661	0.000825384	0.000403794	RAF1/SFRP1/KIT/MYC/SOX9	5
BP	GO:0071364	cellular response to epidermal growth factor stimulus	5/233	43/18800	0.000183661	0.000825384	0.000403794	COL1A1/MYC/SNAI2/ID1/SOX9	5
BP	GO:0002287	alpha-beta T cell activation involved in immune response	6/233	68/18800	0.00019585	0.000876369	0.000428736	SOCS5/JAK3/RELB/STAT6/BCL3/LEF1	6
BP	GO:0002293	alpha-beta T cell differentiation involved in immune response	6/233	68/18800	0.00019585	0.000876369	0.000428736	SOCS5/JAK3/RELB/STAT6/BCL3/LEF1	6
BP	GO:0060193	positive regulation of lipase activity	6/233	68/18800	0.00019585	0.000876369	0.000428736	FGFR1/PDGFRA/LPAR1/KIT/PDGFRB/CCL5	6
BP	GO:1900046	regulation of hemostasis	6/233	68/18800	0.00019585	0.000876369	0.000428736	UBASH3B/PDGFRA/THBS1/SERPINE1/SERPINF2/ADAMTS18	6
BP	GO:0001779	natural killer cell differentiation	4/233	24/18800	0.000201043	0.000890974	0.000435882	AXL/PIK3CD/PTPRC/GAS6	4
BP	GO:0003181	atrioventricular valve morphogenesis	4/233	24/18800	0.000201043	0.000890974	0.000435882	EFNA1/TGFB2/TGFBR2/BMPR1A	4
BP	GO:0035994	response to muscle stretch	4/233	24/18800	0.000201043	0.000890974	0.000435882	PTK2/RAF1/FOS/CTNNB1	4
BP	GO:0040037	negative regulation of fibroblast growth factor receptor signaling pathway	4/233	24/18800	0.000201043	0.000890974	0.000435882	THBS1/WNT4/SULF1/SULF2	4
BP	GO:0045649	regulation of macrophage differentiation	4/233	24/18800	0.000201043	0.000890974	0.000435882	TGFB1/CSF1/HCLS1/ID2	4
BP	GO:0048745	smooth muscle tissue development	4/233	24/18800	0.000201043	0.000890974	0.000435882	BMP4/DLG1/EFEMP2/SOX9	4
BP	GO:0061162	establishment of monopolar cell polarity	4/233	24/18800	0.000201043	0.000890974	0.000435882	CDC42/PATJ/FOXF1/FSCN1	4
BP	GO:0072207	metanephric epithelium development	4/233	24/18800	0.000201043	0.000890974	0.000435882	WWTR1/WNT4/WNT7B/SOX9	4
BP	GO:1901863	positive regulation of muscle tissue development	4/233	24/18800	0.000201043	0.000890974	0.000435882	ERBB3/PRKAA1/CTNNB1/FLOT1	4
BP	GO:2001239	regulation of extrinsic apoptotic signaling pathway in absence of ligand	5/233	44/18800	0.000205134	0.000908137	0.000444278	IL7/FGFR1/TNF/SNAI2/PPP2R1B	5
BP	GO:0002676	regulation of chronic inflammatory response	3/233	10/18800	0.000211473	0.000927312	0.000453659	TNFAIP3/CCL5/TNF	3
BP	GO:0003418	growth plate cartilage chondrocyte differentiation	3/233	10/18800	0.000211473	0.000927312	0.000453659	TGFBR2/COL27A1/SOX9	3
NA	GO:0033197	response to vitamin E	3/233	10/18800	0.000211473	0.000927312	0.000453659	COL1A1/IGF1R/CCND1	3
BP	GO:0035747	natural killer cell chemotaxis	3/233	10/18800	0.000211473	0.000927312	0.000453659	PIK3CG/PIK3CD/CCL5	3
BP	GO:0035878	nail development	3/233	10/18800	0.000211473	0.000927312	0.000453659	ITGB4/ITGA6/FZD6	3
BP	GO:0051918	negative regulation of fibrinolysis	3/233	10/18800	0.000211473	0.000927312	0.000453659	THBS1/SERPINE1/SERPINF2	3
BP	GO:0061626	pharyngeal arch artery morphogenesis	3/233	10/18800	0.000211473	0.000927312	0.000453659	TGFB2/BMPR1A/BMP4	3
BP	GO:1901203	positive regulation of extracellular matrix assembly	3/233	10/18800	0.000211473	0.000927312	0.000453659	TGFB1/SMAD3/SOX9	3
BP	GO:2000347	positive regulation of hepatocyte proliferation	3/233	10/18800	0.000211473	0.000927312	0.000453659	PTN/TNFAIP3/TNF	3
BP	GO:0032715	negative regulation of interleukin-6 production	6/233	69/18800	0.000212307	0.000929989	0.000454968	TNFAIP3/INPP5D/SOCS5/ARRB1/TNF/GAS6	6
BP	GO:0017015	regulation of transforming growth factor beta receptor signaling pathway	8/233	130/18800	0.000219056	0.000958544	0.000468938	TGFB1/TGFB3/TP53/THBS1/AXIN1/SMAD3/SMAD2/LOX	8
BP	GO:0007389	pattern specification process	16/233	463/18800	0.000227015	0.000992326	0.000485465	TP53/SFRP1/GREM1/AXIN1/LEF1/SMAD3/WNT7B/SMAD1/AXIN2/TGFBR2/BMPR1A/BMP4/SMAD2/WNT6/CTNNB1/FOXF1	16
BP	GO:1904646	cellular response to amyloid-beta	5/233	45/18800	0.000228466	0.000997619	0.000488054	ITGA4/IGF1R/TNF/FYN/LRP1	5
BP	GO:0051057	positive regulation of small GTPase mediated signal transduction	6/233	70/18800	0.000229835	0.00100149	0.000489949	TGM2/PIK3CG/LPAR1/CSF1/PDGFRB/ARRB1	6
BP	GO:0071260	cellular response to mechanical stimulus	6/233	70/18800	0.000229835	0.00100149	0.000489949	COL1A1/ITGA2/BAD/IGF1R/GADD45A/SOX9	6
BP	GO:0003148	outflow tract septum morphogenesis	4/233	25/18800	0.000237021	0.00102742	0.000502634	TGFB2/TGFBR2/BMPR1A/BMP4	4
BP	GO:0031579	membrane raft organization	4/233	25/18800	0.000237021	0.00102742	0.000502634	PTPRC/DLG1/FLOT1/ANXA2	4
BP	GO:0045662	negative regulation of myoblast differentiation	4/233	25/18800	0.000237021	0.00102742	0.000502634	TGFB1/TNF/BMP4/SOX9	4
BP	GO:0060396	growth hormone receptor signaling pathway	4/233	25/18800	0.000237021	0.00102742	0.000502634	PTK2/SOCS2/JAK3/STAT6	4
BP	GO:0061339	establishment or maintenance of monopolar cell polarity	4/233	25/18800	0.000237021	0.00102742	0.000502634	CDC42/PATJ/FOXF1/FSCN1	4
BP	GO:0050766	positive regulation of phagocytosis	6/233	71/18800	0.000248482	0.00107486	0.000525843	ITGA2/IL2RG/PTPRC/TNF/GAS6/PTX3	6
BP	GO:0050818	regulation of coagulation	6/233	71/18800	0.000248482	0.00107486	0.000525843	UBASH3B/PDGFRA/THBS1/SERPINE1/SERPINF2/ADAMTS18	6
BP	GO:1903844	regulation of cellular response to transforming growth factor beta stimulus	8/233	133/18800	0.000256008	0.00110626	0.000541206	TGFB1/TGFB3/TP53/THBS1/AXIN1/SMAD3/SMAD2/LOX	8
BP	GO:0036296	response to increased oxygen levels	4/233	26/18800	0.000277407	0.00119625	0.000585227	MMP2/COL1A1/PDGFRB/PDPN	4
BP	GO:0048641	regulation of skeletal muscle tissue development	4/233	26/18800	0.000277407	0.00119625	0.000585227	TGFB1/PRKAA1/CTNNB1/FLOT1	4
BP	GO:0051972	regulation of telomerase activity	5/233	47/18800	0.000281133	0.00121106	0.000592473	MAPK1/TP53/GREM1/MYC/CTNNB1	5
BP	GO:0014831	gastro-intestinal system smooth muscle contraction	3/233	11/18800	0.000288117	0.00123094	0.000602199	KIT/SULF1/SULF2	3
BP	GO:0032836	glomerular basement membrane development	3/233	11/18800	0.000288117	0.00123094	0.000602199	SULF1/MPV17/SULF2	3
BP	GO:0046643	regulation of gamma-delta T cell activation	3/233	11/18800	0.000288117	0.00123094	0.000602199	PTPRC/LEF1/TCF7	3
BP	GO:0048103	somatic stem cell division	3/233	11/18800	0.000288117	0.00123094	0.000602199	KIT/TGFB2/FZD7	3
BP	GO:0071394	cellular response to testosterone stimulus	3/233	11/18800	0.000288117	0.00123094	0.000602199	SPP1/MYC/IGF1R	3
BP	GO:0071492	cellular response to UV-A	3/233	11/18800	0.000288117	0.00123094	0.000602199	TIMP1/MMP2/MMP9	3
BP	GO:0072205	metanephric collecting duct development	3/233	11/18800	0.000288117	0.00123094	0.000602199	AKR1B1/WNT7B/BMP4	3
BP	GO:1903799	negative regulation of production of miRNAs involved in gene silencing by miRNA	3/233	11/18800	0.000288117	0.00123094	0.000602199	TGFB1/TP53/TNF	3
BP	GO:0003281	ventricular septum development	6/233	73/18800	0.000289337	0.00123488	0.000604128	TGFB2/FZD1/FZD2/TGFBR2/BMPR1A/BMP4	6
BP	GO:0051924	regulation of calcium ion transport	11/233	251/18800	0.000309964	0.00132156	0.000646533	SPHK2/PTK2B/UBASH3B/BAX/PIK3CG/CD19/PDGFRB/JAK3/CCL5/FYN/CTNNB1	11
BP	GO:0031641	regulation of myelination	5/233	48/18800	0.000310685	0.00132192	0.00064671	PTN/TNF/DLG1/CTNNB1/TNFRSF1B	5
BP	GO:0035850	epithelial cell differentiation involved in kidney development	5/233	48/18800	0.000310685	0.00132192	0.00064671	GREM1/WWTR1/BMP4/CTNNB1/MMP9	5
BP	GO:0002444	myeloid leukocyte mediated immunity	7/233	104/18800	0.000314643	0.00133603	0.00065361	SPHK2/RAC2/PIK3CG/KIT/PIK3CD/ITGB2/FOXF1	7
BP	GO:0019218	regulation of steroid metabolic process	7/233	104/18800	0.000314643	0.00133603	0.00065361	GNB3/KIT/PRKAA1/IGF1R/TNF/WNT4/SNAI2	7
BP	GO:0050708	regulation of protein secretion	11/233	252/18800	0.00032064	0.0013601	0.000665388	TGFB1/TGFB3/ADAM8/SFRP1/SYT7/VEGFC/BAD/TGFB2/CCL5/TNF/TCF7L2	11
BP	GO:0002675	positive regulation of acute inflammatory response	4/233	27/18800	0.000322504	0.00136107	0.000665859	ADAM8/PIK3CG/OSMR/TNF	4
BP	GO:0003171	atrioventricular valve development	4/233	27/18800	0.000322504	0.00136107	0.000665859	EFNA1/TGFB2/TGFBR2/BMPR1A	4
BP	GO:0009651	response to salt stress	4/233	27/18800	0.000322504	0.00136107	0.000665859	TP53/BAX/AKR1B1/TNF	4
BP	GO:0030325	adrenal gland development	4/233	27/18800	0.000322504	0.00136107	0.000665859	PDGFRA/WNT4/SMAD3/SMAD2	4
BP	GO:0072012	glomerulus vasculature development	4/233	27/18800	0.000322504	0.00136107	0.000665859	PDGFRA/ANGPT2/PDGFRB/BMP4	4
BP	GO:0002705	positive regulation of leukocyte mediated immunity	8/233	138/18800	0.000328844	0.00138501	0.000677573	TGFB1/KIT/IL1R1/TRAF2/STAT6/PTPRC/TNF/ITGB2	8
BP	GO:0007266	Rho protein signal transduction	8/233	138/18800	0.000328844	0.00138501	0.000677573	CDC42/RAF1/LPAR1/ITGB1/PDGFRB/ARRB1/PDPN/FLOT1	8
BP	GO:0010975	regulation of neuron projection development	15/233	431/18800	0.000330249	0.00138952	0.00067978	PTN/PTK2B/SFRP1/SPP1/LPAR3/LPAR1/ITGA6/FN1/EFNA1/IGF1R/INPP5F/FYN/FZD1/DVL1/ID1	15
BP	GO:0035094	response to nicotine	5/233	49/18800	0.000342532	0.00143974	0.00070435	MAPK1/MMP2/BAD/IGF1R/TNF	5
BP	GO:0048813	dendrite morphogenesis	8/233	139/18800	0.000345263	0.00144976	0.000709249	CDC42/PTN/ITGB1/EFNA1/FYN/DLG4/DVL1/ID1	8
BP	GO:0009952	anterior/posterior pattern specification	10/233	214/18800	0.000349841	0.0014675	0.000717927	TP53/SFRP1/LEF1/SMAD3/AXIN2/BMPR1A/BMP4/SMAD2/CTNNB1/FOXF1	10
BP	GO:0003279	cardiac septum development	7/233	106/18800	0.0003535	0.00148135	0.000724705	TP53/TGFB2/FZD1/FZD2/TGFBR2/BMPR1A/BMP4	7
BP	GO:0002292	T cell differentiation involved in immune response	6/233	76/18800	0.000360305	0.00150835	0.000737912	SOCS5/JAK3/RELB/STAT6/BCL3/LEF1	6
BP	GO:0003272	endocardial cushion formation	4/233	28/18800	0.000372619	0.00155053	0.000758549	TGFB2/SNAI2/TGFBR2/BMPR1A	4
BP	GO:0003416	endochondral bone growth	4/233	28/18800	0.000372619	0.00155053	0.000758549	THBS3/TGFBR2/COL27A1/SOX9	4
BP	GO:0010955	negative regulation of protein processing	4/233	28/18800	0.000372619	0.00155053	0.000758549	NOL3/THBS1/SERPINE1/SERPINF2	4
BP	GO:0032801	receptor catabolic process	4/233	28/18800	0.000372619	0.00155053	0.000758549	TGFB1/CAPN1/ANXA2/FURIN	4
BP	GO:0090025	regulation of monocyte chemotaxis	4/233	28/18800	0.000372619	0.00155053	0.000758549	GREM1/DUSP1/CCL5/SERPINE1	4
BP	GO:1903318	negative regulation of protein maturation	4/233	28/18800	0.000372619	0.00155053	0.000758549	NOL3/THBS1/SERPINE1/SERPINF2	4
BP	GO:0050954	sensory perception of mechanical stimulus	9/233	177/18800	0.00037303	0.00155069	0.000758626	COL1A1/ITGA2/KIT/TNF/FYN/AXIN1/SNAI2/FZD4/BIRC5	9
BP	GO:0030857	negative regulation of epithelial cell differentiation	5/233	50/18800	0.000376788	0.00155851	0.000762455	CCND1/ID1/CTNNB1/MMP9/SOX9	5
BP	GO:0035088	establishment or maintenance of apical/basal cell polarity	5/233	50/18800	0.000376788	0.00155851	0.000762455	CDC42/PATJ/DLG1/FOXF1/FSCN1	5
BP	GO:0038084	vascular endothelial growth factor signaling pathway	5/233	50/18800	0.000376788	0.00155851	0.000762455	PDGFRA/VEGFC/VEGFB/PDGFRB/PIK3CD	5
BP	GO:0061245	establishment or maintenance of bipolar cell polarity	5/233	50/18800	0.000376788	0.00155851	0.000762455	CDC42/PATJ/DLG1/FOXF1/FSCN1	5
BP	GO:1902041	regulation of extrinsic apoptotic signaling pathway via death domain receptors	5/233	50/18800	0.000376788	0.00155851	0.000762455	RAF1/TNFAIP3/SFRP1/THBS1/SERPINE1	5
BP	GO:0001553	luteinization	3/233	12/18800	0.000380647	0.0015605	0.000763428	MMP2/PDGFRA/FZD4	3
BP	GO:0003337	mesenchymal to epithelial transition involved in metanephros morphogenesis	3/233	12/18800	0.000380647	0.0015605	0.000763428	GREM1/BMP4/CTNNB1	3
BP	GO:0038063	collagen-activated tyrosine kinase receptor signaling pathway	3/233	12/18800	0.000380647	0.0015605	0.000763428	UBASH3B/COL4A1/COL1A1	3
BP	GO:0051549	positive regulation of keratinocyte migration	3/233	12/18800	0.000380647	0.0015605	0.000763428	FGF7/MMP9/HBEGF	3
BP	GO:0061517	macrophage proliferation	3/233	12/18800	0.000380647	0.0015605	0.000763428	MAPK1/PTK2/CSF1	3
BP	GO:1902337	regulation of apoptotic process involved in morphogenesis	3/233	12/18800	0.000380647	0.0015605	0.000763428	BAX/TGFB2/TNFRSF1B	3
BP	GO:1903800	positive regulation of production of miRNAs involved in gene silencing by miRNA	3/233	12/18800	0.000380647	0.0015605	0.000763428	TGFB1/TP53/BMP4	3
BP	GO:1904953	Wnt signaling pathway involved in midbrain dopaminergic neuron differentiation	3/233	12/18800	0.000380647	0.0015605	0.000763428	CSNK1D/FZD1/CTNNB1	3
BP	GO:2000727	positive regulation of cardiac muscle cell differentiation	3/233	12/18800	0.000380647	0.0015605	0.000763428	TGFB1/GREM1/BMP4	3
BP	GO:1903362	regulation of cellular protein catabolic process	11/233	258/18800	0.000391412	0.00160305	0.000784245	PTK2/PTK2B/TNFAIP3/SOCS5/EFNA1/AXIN1/CSNK1D/DVL1/LRP1/ANXA2/FURIN	11
BP	GO:0043537	negative regulation of blood vessel endothelial cell migration	6/233	78/18800	0.000414712	0.00169681	0.000830111	TGFB1/THBS1/ANGPT4/ANGPT2/GADD45A/TNF	6
BP	GO:0032946	positive regulation of mononuclear cell proliferation	8/233	143/18800	0.000417764	0.00170594	0.000834578	IL7/CSF1/CDKN1A/JAK3/IL2RA/PTPRC/CCL5/TGFBR2	8
BP	GO:0071456	cellular response to hypoxia	8/233	143/18800	0.000417764	0.00170594	0.000834578	TP53/ADAM8/SFRP1/NOL3/ANGPT4/BAD/MYC/PRKAA1	8
BP	GO:0017145	stem cell division	4/233	29/18800	0.000428064	0.00173945	0.000850974	KIT/TGFB2/WWTR1/FZD7	4
BP	GO:0048679	regulation of axon regeneration	4/233	29/18800	0.000428064	0.00173945	0.000850974	PTN/SPP1/IGF1R/INPP5F	4
BP	GO:0061082	myeloid leukocyte cytokine production	4/233	29/18800	0.000428064	0.00173945	0.000850974	TGFB1/TGFB3/KIT/TGFB2	4
BP	GO:0061437	renal system vasculature development	4/233	29/18800	0.000428064	0.00173945	0.000850974	PDGFRA/ANGPT2/PDGFRB/BMP4	4
BP	GO:0061440	kidney vasculature development	4/233	29/18800	0.000428064	0.00173945	0.000850974	PDGFRA/ANGPT2/PDGFRB/BMP4	4
BP	GO:0032418	lysosome localization	6/233	79/18800	0.000444215	0.00180156	0.000881358	SPHK2/RAC2/PIK3CG/KIT/PIK3CD/FOXF1	6
BP	GO:1990849	maintenance of vacuolar location	6/233	79/18800	0.000444215	0.00180156	0.000881358	SPHK2/RAC2/PIK3CG/KIT/PIK3CD/FOXF1	6
BP	GO:0009306	protein secretion	13/233	350/18800	0.000447251	0.00181211	0.000886518	RAF1/TGFB1/TGFB3/ADAM8/SFRP1/SYT7/VEGFC/BAD/TGFB2/CCL5/TNF/SMAD2/TCF7L2	13
BP	GO:0031103	axon regeneration	5/233	52/18800	0.000452997	0.0018336	0.000897032	PTN/MMP2/SPP1/IGF1R/INPP5F	5
BP	GO:0007219	Notch signaling pathway	9/233	182/18800	0.000457122	0.0018485	0.000904321	MMP14/ANGPT4/KIT/IL2RA/ARRB1/TGFB2/SNAI2/TGFBR2/SOX9	9
BP	GO:0035592	establishment of protein localization to extracellular region	13/233	351/18800	0.000459444	0.00185608	0.000908031	RAF1/TGFB1/TGFB3/ADAM8/SFRP1/SYT7/VEGFC/BAD/TGFB2/CCL5/TNF/SMAD2/TCF7L2	13
BP	GO:0001938	positive regulation of endothelial cell proliferation	7/233	111/18800	0.000467631	0.00188549	0.000922419	FGFR1/THBS4/ITGA4/VEGFC/VEGFB/PIK3CD/BMP4	7
BP	GO:0071347	cellular response to interleukin-1	7/233	111/18800	0.000467631	0.00188549	0.000922419	MMP2/SFRP1/MYC/IL1R1/CCL5/SOX9/ADAMTS7	7
BP	GO:1904062	regulation of cation transmembrane transport	13/233	352/18800	0.000471917	0.00190093	0.000929972	SPHK2/PTK2B/CAPN1/UBASH3B/BAX/PIK3CG/ITGB1/CD19/FYN/DLG4/DLG1/MMP9/CTSS	13
BP	GO:0097061	dendritic spine organization	6/233	80/18800	0.000475329	0.00191282	0.000935788	CDC42/EFNA1/IGF1R/FYN/DLG4/DVL1	6
BP	GO:0046718	viral entry into host cell	8/233	146/18800	0.000479885	0.00192929	0.000943844	EPHA2/AXL/ITGB1/ITGA2/ITGA5/ITGB7/GAS6/PTX3	8
BP	GO:0048147	negative regulation of fibroblast proliferation	4/233	30/18800	0.000489151	0.00195612	0.000956972	TP53/SFRP1/BAX/MYC	4
BP	GO:0031053	primary miRNA processing	3/233	13/18800	0.000490324	0.00195612	0.000956972	SMAD3/SMAD1/SMAD2	3
BP	GO:0033689	negative regulation of osteoblast proliferation	3/233	13/18800	0.000490324	0.00195612	0.000956972	SFRP1/GREM1/SMAD3	3
BP	GO:0042492	gamma-delta T cell differentiation	3/233	13/18800	0.000490324	0.00195612	0.000956972	PTPRC/LEF1/TCF7	3
BP	GO:0070234	positive regulation of T cell apoptotic process	3/233	13/18800	0.000490324	0.00195612	0.000956972	TP53/ADAM8/CCL5	3
BP	GO:1901862	negative regulation of muscle tissue development	3/233	13/18800	0.000490324	0.00195612	0.000956972	TGFB1/LEF1/BMP4	3
BP	GO:1903054	negative regulation of extracellular matrix organization	3/233	13/18800	0.000490324	0.00195612	0.000956972	TGFB1/ANTXR1/TNFRSF1B	3
BP	GO:1904748	regulation of apoptotic process involved in development	3/233	13/18800	0.000490324	0.00195612	0.000956972	BAX/TGFB2/TNFRSF1B	3
BP	GO:1902743	regulation of lamellipodium organization	5/233	53/18800	0.00049519	0.00197364	0.000965541	CDC42/RAC2/EPHA2/PDPN/FSCN1	5
BP	GO:0003002	regionalization	13/233	354/18800	0.000497729	0.00198186	0.000969562	TP53/SFRP1/GREM1/AXIN1/LEF1/SMAD3/WNT7B/AXIN2/BMPR1A/BMP4/SMAD2/CTNNB1/FOXF1	13
BP	GO:0120193	tight junction organization	6/233	81/18800	0.000508115	0.00202128	0.000988848	TGFB3/EPHA2/TNF/SNAI2/PATJ/DLG1	6
BP	GO:0051656	establishment of organelle localization	14/233	404/18800	0.000542609	0.00215595	0.00105473	CDC42/SPHK2/RAC2/PIK3CG/ITGB1/ITGA4/KIT/PIK3CD/YWHAZ/CSNK1D/FBXW11/DLG1/CTNNB1/FOXF1	14
BP	GO:0002440	production of molecular mediator of immune response	12/233	312/18800	0.000543007	0.00215595	0.00105473	SPHK2/TGFB1/TGFB3/KIT/JAK3/IL1R1/TRAF2/TGFB2/STAT6/PTPRC/TNF/TNFRSF1B	12
BP	GO:0007043	cell-cell junction assembly	8/233	149/18800	0.000549297	0.00217884	0.00106593	EPHA2/TNF/SNAI2/ACTB/PATJ/DLG1/CTNNB1/FSCN1	8
BP	GO:0034694	response to prostaglandin	4/233	31/18800	0.000556198	0.00219582	0.00107424	SFRP1/GNB1/GNG2/PRKAA1	4
BP	GO:0061036	positive regulation of cartilage development	4/233	31/18800	0.000556198	0.00219582	0.00107424	SMAD3/SMAD1/BMP4/SOX9	4
BP	GO:0071295	cellular response to vitamin	4/233	31/18800	0.000556198	0.00219582	0.00107424	SFRP1/COL1A1/SNAI2/GAS6	4
BP	GO:0098868	bone growth	4/233	31/18800	0.000556198	0.00219582	0.00107424	THBS3/TGFBR2/COL27A1/SOX9	4
BP	GO:0046578	regulation of Ras protein signal transduction	9/233	187/18800	0.000556218	0.00219582	0.00107424	RAF1/PIK3CG/LPAR1/ITGB1/CSF1/PDGFRB/ARRB1/TGFB2/FLOT1	9
BP	GO:0071692	protein localization to extracellular region	13/233	359/18800	0.000567547	0.00223842	0.00109508	RAF1/TGFB1/TGFB3/ADAM8/SFRP1/SYT7/VEGFC/BAD/TGFB2/CCL5/TNF/SMAD2/TCF7L2	13
BP	GO:0022412	cellular process involved in reproduction in multicellular organism	14/233	406/18800	0.000569592	0.00224435	0.00109798	PTN/PTK2B/SFRP1/TMEM119/BAX/ITGB1/ANGPT2/KIT/WNT4/FZD4/FBXW11/BMP4/CTNNB1/PTX3	14
BP	GO:0010675	regulation of cellular carbohydrate metabolic process	8/233	150/18800	0.000574161	0.00225957	0.00110543	PDK4/PTK2B/TP53/PTH1R/BAD/GNB3/MST1/PPP1CB	8
BP	GO:0051604	protein maturation	12/233	314/18800	0.000574542	0.00225957	0.00110543	MMP14/ADAM8/RUNX1/NOL3/THBS1/BAD/SERPINE1/CTSS/MMP16/SERPINF2/ANXA2/FURIN	12
BP	GO:0090288	negative regulation of cellular response to growth factor stimulus	7/233	115/18800	0.000578626	0.00227261	0.0011118	SFRP1/GREM1/THBS1/WNT4/FZD1/SULF1/SULF2	7
BP	GO:0032092	positive regulation of protein binding	6/233	83/18800	0.00057895	0.00227261	0.0011118	BMP4/TCF7L2/MMP9/FLOT1/LRP1/ANXA2	6
BP	GO:0036294	cellular response to decreased oxygen levels	8/233	151/18800	0.000599927	0.00235273	0.001151	TP53/ADAM8/SFRP1/NOL3/ANGPT4/BAD/MYC/PRKAA1	8
BP	GO:0043547	positive regulation of GTPase activity	11/233	272/18800	0.000608891	0.0023854	0.00116698	S1PR1/PTK2B/TGM2/SFRP1/EPHA2/TSC2/ITGB1/ITGA6/CCL5/WNT4/DVL3	11
BP	GO:0002286	T cell activation involved in immune response	7/233	116/18800	0.000609405	0.0023854	0.00116698	TP53/SOCS5/JAK3/RELB/STAT6/BCL3/LEF1	7
BP	GO:0010921	regulation of phosphatase activity	6/233	84/18800	0.000617124	0.00239786	0.00117308	ITGA2/PDGFRB/TGFB2/PTPRC/TNF/SMAD3	6
BP	GO:0002467	germinal center formation	3/233	14/18800	0.000618355	0.00239786	0.00117308	TNFAIP3/BCL3/NFKB2	3
BP	GO:0003376	sphingosine-1-phosphate receptor signaling pathway	3/233	14/18800	0.000618355	0.00239786	0.00117308	SPHK2/S1PR1/PIK3CG	3
BP	GO:0007171	activation of transmembrane receptor protein tyrosine kinase activity	3/233	14/18800	0.000618355	0.00239786	0.00117308	GREM1/PRLR/ANGPT4	3
BP	GO:0032688	negative regulation of interferon-beta production	3/233	14/18800	0.000618355	0.00239786	0.00117308	PPM1B/RELB/NMI	3
BP	GO:0035791	platelet-derived growth factor receptor-beta signaling pathway	3/233	14/18800	0.000618355	0.00239786	0.00117308	PDGFRB/LOX/LRP1	3
BP	GO:0050966	detection of mechanical stimulus involved in sensory perception of pain	3/233	14/18800	0.000618355	0.00239786	0.00117308	ITGA2/TNF/FYN	3
BP	GO:0051547	regulation of keratinocyte migration	3/233	14/18800	0.000618355	0.00239786	0.00117308	FGF7/MMP9/HBEGF	3
BP	GO:0051917	regulation of fibrinolysis	3/233	14/18800	0.000618355	0.00239786	0.00117308	THBS1/SERPINE1/SERPINF2	3
BP	GO:0061043	regulation of vascular wound healing	3/233	14/18800	0.000618355	0.00239786	0.00117308	TNFAIP3/TNF/SERPINE1	3
BP	GO:0019058	viral life cycle	12/233	317/18800	0.000624725	0.0024203	0.00118406	CDC42/EPHA2/AXL/ITGB1/ITGA2/ITGA5/ITGB7/CCL5/TNF/GAS6/PTX3/FURIN	12
BP	GO:0050871	positive regulation of B cell activation	8/233	152/18800	0.00062662	0.00242532	0.00118651	MMP14/TGFB1/INPP5D/IL7/CDKN1A/BAD/STAT6/PTPRC	8
BP	GO:0030201	heparan sulfate proteoglycan metabolic process	4/233	32/18800	0.000629522	0.00242532	0.00118651	TCF7L2/CTNNB1/SULF1/SULF2	4
BP	GO:0030947	regulation of vascular endothelial growth factor receptor signaling pathway	4/233	32/18800	0.000629522	0.00242532	0.00118651	VEGFC/ITGA5/FZD4/PRKCB	4
BP	GO:0060914	heart formation	4/233	32/18800	0.000629522	0.00242532	0.00118651	AXIN2/BMPR1A/BMP4/CTNNB1	4
BP	GO:0070570	regulation of neuron projection regeneration	4/233	32/18800	0.000629522	0.00242532	0.00118651	PTN/SPP1/IGF1R/INPP5F	4
BP	GO:1902624	positive regulation of neutrophil migration	4/233	32/18800	0.000629522	0.00242532	0.00118651	RAC2/ADAM8/THBS4/IL1R1	4
BP	GO:0061756	leukocyte adhesion to vascular endothelial cell	5/233	56/18800	0.000639607	0.00246189	0.00120441	ITGB1/ITGA4/ITGB7/TNF/ITGB2	5
BP	GO:0043087	regulation of GTPase activity	13/233	364/18800	0.00064548	0.0024822	0.00121434	PTK2/S1PR1/PTK2B/TGM2/GPR137B/SFRP1/EPHA2/TSC2/ITGB1/ITGA6/CCL5/WNT4/DVL3	13
BP	GO:1903532	positive regulation of secretion by cell	11/233	274/18800	0.000646925	0.00248546	0.00121593	SPHK2/TGFB1/TGFB3/ADAM8/SYT7/SPP1/VEGFC/BAD/TGFB2/ITGB2/TCF7L2	11
BP	GO:0044409	entry into host	8/233	153/18800	0.000654264	0.00251134	0.00122859	EPHA2/AXL/ITGB1/ITGA2/ITGA5/ITGB7/GAS6/PTX3	8
BP	GO:0008286	insulin receptor signaling pathway	7/233	118/18800	0.00067486	0.002588	0.0012661	PDK4/SHC1/TSC2/PRKAA1/IGF1R/SOCS3/PRKCB	7
BP	GO:0043388	positive regulation of DNA binding	5/233	57/18800	0.000694115	0.00265939	0.00130102	TGFB1/ITGA2/MYC/CTNNB1/MMP9	5
BP	GO:0002312	B cell activation involved in immune response	6/233	86/18800	0.00069931	0.00267682	0.00130955	TGFB1/PTK2B/CD19/STAT6/PTPRC/BCL3	6
BP	GO:0045055	regulated exocytosis	10/233	234/18800	0.000702988	0.00268596	0.00131402	SPHK2/RAC2/SYT7/PIK3CG/KIT/PIK3CD/ITGB2/DVL1/FOXF1/PRKCB	10
BP	GO:0045930	negative regulation of mitotic cell cycle	10/233	234/18800	0.000702988	0.00268596	0.00131402	TP53/CDKN1A/DUSP1/TNF/CRLF3/BMP4/CCND1/FZD3/DLG1/CTNNB1	10
BP	GO:0036336	dendritic cell migration	4/233	33/18800	0.000709445	0.00269823	0.00132002	CDC42/PIK3CG/CCL5/GAS6	4
BP	GO:0045940	positive regulation of steroid metabolic process	4/233	33/18800	0.000709445	0.00269823	0.00132002	PRKAA1/IGF1R/TNF/WNT4	4
BP	GO:0050901	leukocyte tethering or rolling	4/233	33/18800	0.000709445	0.00269823	0.00132002	ITGB1/ITGA4/ITGB7/TNF	4
BP	GO:0050974	detection of mechanical stimulus involved in sensory perception	4/233	33/18800	0.000709445	0.00269823	0.00132002	ITGA2/KIT/TNF/FYN	4
BP	GO:0060317	cardiac epithelial to mesenchymal transition	4/233	33/18800	0.000709445	0.00269823	0.00132002	EFNA1/TGFB2/SNAI2/TGFBR2	4
BP	GO:0035023	regulation of Rho protein signal transduction	6/233	87/18800	0.000743453	0.00282241	0.00138078	RAF1/LPAR1/ITGB1/PDGFRB/ARRB1/FLOT1	6
BP	GO:0055017	cardiac muscle tissue growth	6/233	87/18800	0.000743453	0.00282241	0.00138078	S1PR1/RUNX1/TGFB2/SMAD1/TGFBR2/BMPR1A	6
BP	GO:0002702	positive regulation of production of molecular mediator of immune response	7/233	120/18800	0.000745768	0.00282861	0.00138381	SPHK2/TGFB1/KIT/IL1R1/TRAF2/STAT6/PTPRC	7
BP	GO:0002090	regulation of receptor internalization	5/233	58/18800	0.000752024	0.00284197	0.00139034	GREM1/ARRB1/DLG4/FLOT1/ANXA2	5
BP	GO:0042733	embryonic digit morphogenesis	5/233	58/18800	0.000752024	0.00284197	0.00139034	BAX/BMPR1A/BMP4/FZD6/CTNNB1	5
BP	GO:0060038	cardiac muscle cell proliferation	5/233	58/18800	0.000752024	0.00284197	0.00139034	RUNX1/TGFB2/SMAD1/TGFBR2/BMPR1A	5
BP	GO:1900024	regulation of substrate adhesion-dependent cell spreading	5/233	58/18800	0.000752024	0.00284197	0.00139034	CDC42/PTK2/RAC3/PDPN/FBLN1	5
BP	GO:0016032	viral process	14/233	418/18800	0.000756643	0.00285683	0.00139761	CDC42/TP53/EPHA2/AXL/ITGB1/ITGA2/ITGA5/ITGB7/CCL5/TNF/LEF1/GAS6/PTX3/FURIN	14
BP	GO:0042976	activation of Janus kinase activity	3/233	15/18800	0.000765896	0.0028709	0.0014045	PTK2B/PRLR/CCL5	3
BP	GO:0060572	morphogenesis of an epithelial bud	3/233	15/18800	0.000765896	0.0028709	0.0014045	BMP4/CTNNB1/SULF1	3
BP	GO:0061307	cardiac neural crest cell differentiation involved in heart development	3/233	15/18800	0.000765896	0.0028709	0.0014045	MAPK1/CDC42/BMP4	3
BP	GO:0061308	cardiac neural crest cell development involved in heart development	3/233	15/18800	0.000765896	0.0028709	0.0014045	MAPK1/CDC42/BMP4	3
BP	GO:0072044	collecting duct development	3/233	15/18800	0.000765896	0.0028709	0.0014045	AKR1B1/WNT7B/BMP4	3
BP	GO:0072075	metanephric mesenchyme development	3/233	15/18800	0.000765896	0.0028709	0.0014045	PDGFRB/MYC/WNT4	3
BP	GO:0072283	metanephric renal vesicle morphogenesis	3/233	15/18800	0.000765896	0.0028709	0.0014045	GREM1/BMP4/CTNNB1	3
BP	GO:2000345	regulation of hepatocyte proliferation	3/233	15/18800	0.000765896	0.0028709	0.0014045	PTN/TNFAIP3/TNF	3
BP	GO:1903364	positive regulation of cellular protein catabolic process	8/233	157/18800	0.000774852	0.00290186	0.00141964	PTK2/PTK2B/TNFAIP3/SOCS5/AXIN1/CSNK1D/DVL1/LRP1	8
BP	GO:0042594	response to starvation	9/233	196/18800	0.000778759	0.00291386	0.00142552	MAPK1/PDK4/TP53/SFRP1/CDKN1A/PRKAA1/MAX/WNT4/GAS6	9
BP	GO:0051146	striated muscle cell differentiation	11/233	281/18800	0.000795993	0.00297142	0.00145368	MMP14/TGFB1/GREM1/TMEM119/PDGFRA/ITGB1/PDGFRB/FZD7/BMPR1A/BMP4/FLOT1	11
BP	GO:0031128	developmental induction	4/233	34/18800	0.000796287	0.00297142	0.00145368	WNT4/BMP4/CTNNB1/SOX9	4
BP	GO:0051973	positive regulation of telomerase activity	4/233	34/18800	0.000796287	0.00297142	0.00145368	MAPK1/GREM1/MYC/CTNNB1	4
BP	GO:0007292	female gamete generation	8/233	158/18800	0.000807631	0.00301105	0.00147306	PTN/PTK2B/MMP2/MYC/WNT4/CTNNB1/MMP19/PTX3	8
BP	GO:0031102	neuron projection regeneration	5/233	59/18800	0.000813466	0.00303009	0.00148238	PTN/MMP2/SPP1/IGF1R/INPP5F	5
BP	GO:0001776	leukocyte homeostasis	6/233	89/18800	0.000838179	0.00311656	0.00152468	TNFAIP3/AXL/BAX/JAK3/IL2RA/PIK3CD	6
BP	GO:0106027	neuron projection organization	6/233	89/18800	0.000838179	0.00311656	0.00152468	CDC42/EFNA1/IGF1R/FYN/DLG4/DVL1	6
BP	GO:0006606	protein import into nucleus	8/233	159/18800	0.000841515	0.00312617	0.00152938	TGFB1/TP53/TSC2/CDKN1A/HCLS1/BCL3/SMAD3/BMP4	8
BP	GO:0072659	protein localization to plasma membrane	11/233	283/18800	0.000843472	0.00313064	0.00153157	MMP14/TGFB1/EPHA2/ITGB1/LAMA5/TNF/ACTB/DLG1/FLOT1/GAS6/LRP1	11
BP	GO:0002224	toll-like receptor signaling pathway	7/233	123/18800	0.000863051	0.0031976	0.00156433	TNFAIP3/PIK3AP1/RPS6KA3/TNF/NMI/CTSS/FLOT1	7
BP	GO:0002244	hematopoietic progenitor cell differentiation	7/233	123/18800	0.000863051	0.0031976	0.00156433	TGFB1/TP53/SFRP1/PDGFRA/KIT/PTPRC/BMP4	7
BP	GO:0046824	positive regulation of nucleocytoplasmic transport	5/233	60/18800	0.000878574	0.00324932	0.00158963	TGFB1/HCLS1/SMAD3/TCF7L2/GAS6	5
BP	GO:1903078	positive regulation of protein localization to plasma membrane	5/233	60/18800	0.000878574	0.00324932	0.00158963	EPHA2/ITGB1/TNF/DLG1/LRP1	5
BP	GO:0001569	branching involved in blood vessel morphogenesis	4/233	35/18800	0.000890371	0.00328127	0.00160526	COL4A1/LEF1/TGFBR2/CTNNB1	4
BP	GO:0010762	regulation of fibroblast migration	4/233	35/18800	0.000890371	0.00328127	0.00160526	PTK2/TGFB1/THBS1/ITGB1	4
BP	GO:0034110	regulation of homotypic cell-cell adhesion	4/233	35/18800	0.000890371	0.00328127	0.00160526	UBASH3B/CCL5/PDPN/ADAMTS18	4
BP	GO:0050869	negative regulation of B cell activation	4/233	35/18800	0.000890371	0.00328127	0.00160526	TNFAIP3/INPP5D/SFRP1/ID2	4
BP	GO:0019318	hexose metabolic process	10/233	242/18800	0.000909147	0.0033475	0.00163766	PDK4/TP53/BAD/GNB3/MYC/PRKAA1/AKR1B1/TNF/MST1/PPP1CB	10
BP	GO:0044403	symbiont process	11/233	286/18800	0.000919078	0.00338107	0.00165408	EPHA2/AXL/ITGB1/FN1/ITGA2/ITGA5/ITGB7/CCL5/LEF1/GAS6/PTX3	11
BP	GO:0006006	glucose metabolic process	9/233	201/18800	0.000930789	0.003412	0.00166921	PDK4/TP53/BAD/GNB3/MYC/PRKAA1/TNF/MST1/PPP1CB	9
BP	GO:0023035	CD40 signaling pathway	3/233	16/18800	0.000934051	0.003412	0.00166921	TNFAIP3/ITGB1/ITGA5	3
BP	GO:0034349	glial cell apoptotic process	3/233	16/18800	0.000934051	0.003412	0.00166921	TP53/TRAF2/GAS6	3
BP	GO:0042532	negative regulation of tyrosine phosphorylation of STAT protein	3/233	16/18800	0.000934051	0.003412	0.00166921	INPP5F/SOCS3/NF2	3
BP	GO:0045780	positive regulation of bone resorption	3/233	16/18800	0.000934051	0.003412	0.00166921	ADAM8/LTBP3/SPP1	3
BP	GO:0048266	behavioral response to pain	3/233	16/18800	0.000934051	0.003412	0.00166921	THBS4/THBS1/LPAR5	3
BP	GO:0090520	sphingolipid mediated signaling pathway	3/233	16/18800	0.000934051	0.003412	0.00166921	SPHK2/S1PR1/PIK3CG	3
BP	GO:2000696	regulation of epithelial cell differentiation involved in kidney development	3/233	16/18800	0.000934051	0.003412	0.00166921	WWTR1/CTNNB1/MMP9	3
BP	GO:0070664	negative regulation of leukocyte proliferation	6/233	91/18800	0.000941953	0.00343482	0.00168038	TNFAIP3/INPP5D/GREM1/IL2RA/BMP4/DLG1	6
BP	GO:1903351	cellular response to dopamine	6/233	91/18800	0.000941953	0.00343482	0.00168038	MAPK1/TGM2/GNB1/GNG2/CHRM1/ID1	6
BP	GO:0035306	positive regulation of dephosphorylation	5/233	61/18800	0.000947485	0.00344593	0.00168581	TGFB1/ITGA2/PDGFRB/PTPRC/SMAD3	5
BP	GO:0043112	receptor metabolic process	5/233	61/18800	0.000947485	0.00344593	0.00168581	TGFB1/CAPN1/INPP5F/ANXA2/FURIN	5
BP	GO:2001244	positive regulation of intrinsic apoptotic signaling pathway	5/233	61/18800	0.000947485	0.00344593	0.00168581	TP53/BAX/BAD/MYC/BBC3	5
BP	GO:0046488	phosphatidylinositol metabolic process	8/233	162/18800	0.000950075	0.00345233	0.00168894	INPP5D/SOCS2/SOCS5/PIK3CG/PDGFRB/PIK3CD/INPP5F/SOCS3	8
BP	GO:0007249	I-kappaB kinase/NF-kappaB signaling	11/233	288/18800	0.000972536	0.00353086	0.00172736	SPHK2/TNFAIP3/LPAR1/TRAF2/PPM1B/RELB/TNF/FYN/BCL3/CTNNB1/PRKCB	11
BP	GO:0051170	import into nucleus	8/233	163/18800	0.000988656	0.00358282	0.00175278	TGFB1/TP53/TSC2/CDKN1A/HCLS1/BCL3/SMAD3/BMP4	8
BP	GO:0099173	postsynapse organization	8/233	163/18800	0.000988656	0.00358282	0.00175278	CDC42/EFNA1/IGF1R/FYN/DLG4/ACTB/DVL1/DLG1	8
BP	GO:0010922	positive regulation of phosphatase activity	4/233	36/18800	0.000992019	0.00358282	0.00175278	ITGA2/PDGFRB/PTPRC/SMAD3	4
BP	GO:0030224	monocyte differentiation	4/233	36/18800	0.000992019	0.00358282	0.00175278	INPP5D/CSF1/MYC/BMP4	4
BP	GO:0030851	granulocyte differentiation	4/233	36/18800	0.000992019	0.00358282	0.00175278	INPP5D/RUNX1/HCLS1/LEF1	4
BP	GO:0032350	regulation of hormone metabolic process	4/233	36/18800	0.000992019	0.00358282	0.00175278	GNB3/IGF1R/WNT4/TCF7L2	4
BP	GO:1900407	regulation of cellular response to oxidative stress	6/233	92/18800	0.000997409	0.00359603	0.00175925	NOL3/TNF/FYN/FZD1/CTNNB1/FBLN5	6
BP	GO:1903350	response to dopamine	6/233	92/18800	0.000997409	0.00359603	0.00175925	MAPK1/TGM2/GNB1/GNG2/CHRM1/ID1	6
BP	GO:0072594	establishment of protein localization to organelle	14/233	431/18800	0.00101554	0.00365823	0.00178968	TGFB1/RAC2/TNFAIP3/TP53/BAX/TSC2/CDKN1A/PRKAA1/HCLS1/IL10RA/BCL3/SMAD3/BMP4/BBC3	14
BP	GO:0031663	lipopolysaccharide-mediated signaling pathway	5/233	62/18800	0.00102033	0.00366597	0.00179346	MAPK1/TGFB1/TNFAIP3/CCL5/TNF	5
BP	GO:0046579	positive regulation of Ras protein signal transduction	5/233	62/18800	0.00102033	0.00366597	0.00179346	PIK3CG/LPAR1/CSF1/PDGFRB/ARRB1	5
BP	GO:0046902	regulation of mitochondrial membrane permeability	5/233	62/18800	0.00102033	0.00366597	0.00179346	TP53/NOL3/BAX/BAD/BBC3	5
BP	GO:1990778	protein localization to cell periphery	12/233	337/18800	0.00106236	0.00381367	0.00186572	MMP14/TGFB1/EPHA2/ITGB1/LAMA5/TNF/DLG4/ACTB/DLG1/FLOT1/GAS6/LRP1	12
BP	GO:0007623	circadian rhythm	9/233	205/18800	0.00106905	0.00383438	0.00187585	TP53/PRKAA1/RELB/TNF/CSNK1D/FBXW11/ID2/ID1/PPP1CB	9
BP	GO:0050714	positive regulation of protein secretion	7/233	128/18800	0.00109041	0.00390763	0.00191169	TGFB1/TGFB3/ADAM8/VEGFC/BAD/TGFB2/TCF7L2	7
BP	GO:2000242	negative regulation of reproductive process	5/233	63/18800	0.00109726	0.00392724	0.00192128	TIMP1/DUSP1/WNT4/BMP4/SULF1	5
BP	GO:0046627	negative regulation of insulin receptor signaling pathway	4/233	37/18800	0.00110155	0.00392724	0.00192128	TSC2/PRKAA1/SOCS3/PRKCB	4
BP	GO:0070306	lens fiber cell differentiation	4/233	37/18800	0.00110155	0.00392724	0.00192128	EPHA2/NF2/SMAD3/WNT7B	4
BP	GO:0071542	dopaminergic neuron differentiation	4/233	37/18800	0.00110155	0.00392724	0.00192128	SFRP1/CSNK1D/FZD1/CTNNB1	4
BP	GO:2000403	positive regulation of lymphocyte migration	4/233	37/18800	0.00110155	0.00392724	0.00192128	PTK2B/ADAM8/ITGA4/CCL5	4
BP	GO:2000758	positive regulation of peptidyl-lysine acetylation	4/233	37/18800	0.00110155	0.00392724	0.00192128	SPHK2/PRKAA1/ARRB1/SNAI2	4
BP	GO:0071453	cellular response to oxygen levels	8/233	166/18800	0.00111198	0.00396102	0.00193781	TP53/ADAM8/SFRP1/NOL3/ANGPT4/BAD/MYC/PRKAA1	8
BP	GO:0001710	mesodermal cell fate commitment	3/233	17/18800	0.00112388	0.00397613	0.0019452	SMAD1/BMPR1A/BMP4	3
BP	GO:0003198	epithelial to mesenchymal transition involved in endocardial cushion formation	3/233	17/18800	0.00112388	0.00397613	0.0019452	TGFB2/SNAI2/TGFBR2	3
BP	GO:0010934	macrophage cytokine production	3/233	17/18800	0.00112388	0.00397613	0.0019452	TGFB1/TGFB3/TGFB2	3
BP	GO:0010935	regulation of macrophage cytokine production	3/233	17/18800	0.00112388	0.00397613	0.0019452	TGFB1/TGFB3/TGFB2	3
BP	GO:0036342	post-anal tail morphogenesis	3/233	17/18800	0.00112388	0.00397613	0.0019452	EPHA2/AXIN1/FZD3	3
BP	GO:0048557	embryonic digestive tract morphogenesis	3/233	17/18800	0.00112388	0.00397613	0.0019452	PDGFRA/ID2/FOXF1	3
BP	GO:0090399	replicative senescence	3/233	17/18800	0.00112388	0.00397613	0.0019452	TP53/CDKN1A/SERPINE1	3
BP	GO:2001267	regulation of cysteine-type endopeptidase activity involved in apoptotic signaling pathway	3/233	17/18800	0.00112388	0.00397613	0.0019452	BAX/SMAD3/MMP9	3
BP	GO:0045786	negative regulation of cell cycle	13/233	387/18800	0.00113051	0.0039962	0.00195502	MAPK12/TGFB1/TNFAIP3/TP53/CDKN1A/DUSP1/TNF/CRLF3/BMP4/CCND1/FZD3/DLG1/CTNNB1	13
BP	GO:0034250	positive regulation of cellular amide metabolic process	8/233	167/18800	0.00115572	0.00408183	0.00199691	SPHK2/PTK2B/THBS1/ITGA2/EFNA1/CCL5/TNF/BCL3	8
BP	GO:0045995	regulation of embryonic development	5/233	64/18800	0.0011784	0.00415489	0.00203265	LAMA3/LAMA4/LAMA5/WNT4/CTNNB1	5
BP	GO:1903018	regulation of glycoprotein metabolic process	5/233	64/18800	0.0011784	0.00415489	0.00203265	JAK3/TCF7L2/CTNNB1/PTX3/HBEGF	5
BP	GO:0035303	regulation of dephosphorylation	7/233	130/18800	0.00119353	0.00420467	0.002057	TGFB1/ITGA2/PDGFRB/TGFB2/PTPRC/TNF/SMAD3	7
BP	GO:0032091	negative regulation of protein binding	6/233	96/18800	0.00124472	0.00437389	0.00213979	BAX/ITGA4/CDKN1A/ACTB/DVL1/ID1	6
BP	GO:0051153	regulation of striated muscle cell differentiation	6/233	96/18800	0.00124472	0.00437389	0.00213979	MMP14/TGFB1/GREM1/TMEM119/FZD7/BMP4	6
BP	GO:0060419	heart growth	6/233	96/18800	0.00124472	0.00437389	0.00213979	S1PR1/RUNX1/TGFB2/SMAD1/TGFBR2/BMPR1A	6
BP	GO:0014823	response to activity	5/233	65/18800	0.0012639	0.00443377	0.00216909	MMP2/ITGA2/ANGPT2/PRKAA1/TNF	5
BP	GO:0030858	positive regulation of epithelial cell differentiation	5/233	65/18800	0.0012639	0.00443377	0.00216909	BAD/SERPINE1/BMP4/CTNNB1/SOX9	5
BP	GO:1900180	regulation of protein localization to nucleus	7/233	132/18800	0.00130414	0.00457109	0.00223626	TGFB1/HCLS1/FYN/WWTR1/NF2/SMAD3/BMP4	7
BP	GO:0010596	negative regulation of endothelial cell migration	6/233	97/18800	0.0013133	0.0045993	0.00225007	TGFB1/THBS1/ANGPT4/ANGPT2/GADD45A/TNF	6
BP	GO:0051056	regulation of small GTPase mediated signal transduction	11/233	299/18800	0.0013146	0.0046	0.00225041	RAF1/TGM2/TSC2/PIK3CG/LPAR1/ITGB1/CSF1/PDGFRB/ARRB1/TGFB2/FLOT1	11
BP	GO:0001946	lymphangiogenesis	3/233	18/18800	0.00133638	0.00464103	0.00227048	EPHA2/VEGFC/PDPN	3
BP	GO:0034138	toll-like receptor 3 signaling pathway	3/233	18/18800	0.00133638	0.00464103	0.00227048	TNFAIP3/TNF/FLOT1	3
BP	GO:0048535	lymph node development	3/233	18/18800	0.00133638	0.00464103	0.00227048	TGFB1/IL7R/PDPN	3
BP	GO:0060644	mammary gland epithelial cell differentiation	3/233	18/18800	0.00133638	0.00464103	0.00227048	PRLR/ID2/FOXF1	3
BP	GO:0060965	negative regulation of gene silencing by miRNA	3/233	18/18800	0.00133638	0.00464103	0.00227048	TGFB1/TP53/TNF	3
BP	GO:0072189	ureter development	3/233	18/18800	0.00133638	0.00464103	0.00227048	BMP4/FOXF1/SOX9	3
BP	GO:0072234	metanephric nephron tubule development	3/233	18/18800	0.00133638	0.00464103	0.00227048	WWTR1/WNT7B/SOX9	3
BP	GO:0097284	hepatocyte apoptotic process	3/233	18/18800	0.00133638	0.00464103	0.00227048	PIK3CG/PRKAA1/IGF1R	3
BP	GO:2000136	regulation of cell proliferation involved in heart morphogenesis	3/233	18/18800	0.00133638	0.00464103	0.00227048	BMP4/CTNNB1/SOX9	3
BP	GO:2001242	regulation of intrinsic apoptotic signaling pathway	8/233	171/18800	0.00134458	0.00466131	0.0022804	TP53/NOL3/BAX/BAD/MYC/SNAI2/BBC3/MMP9	8
BP	GO:0097242	amyloid-beta clearance	4/233	39/18800	0.00134558	0.00466131	0.0022804	IGF1R/TNF/ITGB2/LRP1	4
BP	GO:1900077	negative regulation of cellular response to insulin stimulus	4/233	39/18800	0.00134558	0.00466131	0.0022804	TSC2/PRKAA1/SOCS3/PRKCB	4
BP	GO:0051047	positive regulation of secretion	11/233	300/18800	0.00135007	0.00467297	0.00228611	SPHK2/TGFB1/TGFB3/ADAM8/SYT7/SPP1/VEGFC/BAD/TGFB2/ITGB2/TCF7L2	11
BP	GO:0070265	necrotic cell death	5/233	66/18800	0.00135389	0.00468231	0.00229067	TP53/NOL3/BAX/TRAF2/TNF	5
BP	GO:0034101	erythrocyte homeostasis	7/233	133/18800	0.00136237	0.0047077	0.0023031	INPP5D/AXL/KIT/JAK3/HCLS1/BMP4/ID2	7
BP	GO:0006661	phosphatidylinositol biosynthetic process	7/233	134/18800	0.00142261	0.00491179	0.00240294	INPP5D/SOCS2/SOCS5/PIK3CG/PIK3CD/INPP5F/SOCS3	7
BP	GO:0042531	positive regulation of tyrosine phosphorylation of STAT protein	5/233	67/18800	0.00144853	0.00499298	0.00244266	KIT/HCLS1/CCL5/TNF/FYN	5
BP	GO:1904377	positive regulation of protein localization to cell periphery	5/233	67/18800	0.00144853	0.00499298	0.00244266	EPHA2/ITGB1/TNF/DLG1/LRP1	5
BP	GO:0001953	negative regulation of cell-matrix adhesion	4/233	40/18800	0.00148071	0.00509546	0.0024928	MMP14/THBS1/NF2/SERPINE1	4
BP	GO:0071392	cellular response to estradiol stimulus	4/233	40/18800	0.00148071	0.00509546	0.0024928	MMP2/SFRP1/ITGA2/IGF1R	4
BP	GO:0010950	positive regulation of endopeptidase activity	8/233	174/18800	0.00150171	0.00516346	0.00252606	BAX/BAD/EFNA1/MYC/TNF/FYN/SMAD3/BBC3	8
BP	GO:0046854	phosphatidylinositol phosphorylation	5/233	68/18800	0.00154795	0.00531364	0.00259953	SOCS2/SOCS5/PIK3CG/PIK3CD/SOCS3	5
BP	GO:0051148	negative regulation of muscle cell differentiation	5/233	68/18800	0.00154795	0.00531364	0.00259953	TMEM119/FZD7/SMAD1/BMPR1A/ID2	5
BP	GO:0009581	detection of external stimulus	7/233	136/18800	0.00154932	0.00531398	0.0025997	PTK2/ITGA2/KIT/TNF/FYN/CTNNB1/FOXF1	7
BP	GO:0002706	regulation of lymphocyte mediated immunity	8/233	175/18800	0.00155721	0.00533663	0.00261078	TGFB1/IL7R/IL1R1/TRAF2/STAT6/PTPRC/TNF/TNFRSF1B	8
BP	GO:0002523	leukocyte migration involved in inflammatory response	3/233	19/18800	0.00157251	0.00534062	0.00261274	PTN/ADAM8/TNF	3
BP	GO:0010544	negative regulation of platelet activation	3/233	19/18800	0.00157251	0.00534062	0.00261274	UBASH3B/PDGFRA/ADAMTS18	3
BP	GO:0048643	positive regulation of skeletal muscle tissue development	3/233	19/18800	0.00157251	0.00534062	0.00261274	PRKAA1/CTNNB1/FLOT1	3
BP	GO:0051546	keratinocyte migration	3/233	19/18800	0.00157251	0.00534062	0.00261274	FGF7/MMP9/HBEGF	3
BP	GO:0060149	negative regulation of posttranscriptional gene silencing	3/233	19/18800	0.00157251	0.00534062	0.00261274	TGFB1/TP53/TNF	3
BP	GO:0060967	negative regulation of gene silencing by RNA	3/233	19/18800	0.00157251	0.00534062	0.00261274	TGFB1/TP53/TNF	3
BP	GO:0061323	cell proliferation involved in heart morphogenesis	3/233	19/18800	0.00157251	0.00534062	0.00261274	BMP4/CTNNB1/SOX9	3
BP	GO:0071800	podosome assembly	3/233	19/18800	0.00157251	0.00534062	0.00261274	TNF/FSCN1/SH3PXD2B	3
BP	GO:0097709	connective tissue replacement	3/233	19/18800	0.00157251	0.00534062	0.00261274	TGFB1/TIMP1/RUNX1	3
BP	GO:1900369	negative regulation of RNA interference	3/233	19/18800	0.00157251	0.00534062	0.00261274	TGFB1/TP53/TNF	3
BP	GO:1902894	negative regulation of pri-miRNA transcription by RNA polymerase II	3/233	19/18800	0.00157251	0.00534062	0.00261274	TGFB1/BMP4/SOX9	3
BP	GO:0005996	monosaccharide metabolic process	10/233	261/18800	0.00160252	0.00543812	0.00266043	PDK4/TP53/BAD/GNB3/MYC/PRKAA1/AKR1B1/TNF/MST1/PPP1CB	10
BP	GO:2000241	regulation of reproductive process	8/233	176/18800	0.00161432	0.00547369	0.00267783	TIMP1/SFRP1/DUSP1/WNT4/BMP4/CTNNB1/SULF1/SOX9	8
BP	GO:1902882	regulation of response to oxidative stress	6/233	101/18800	0.00161686	0.00547781	0.00267985	NOL3/TNF/FYN/FZD1/CTNNB1/FBLN5	6
BP	GO:0010959	regulation of metal ion transport	13/233	403/18800	0.00162316	0.00547866	0.00268027	SPHK2/PTK2B/UBASH3B/BAX/PIK3CG/ITGB1/CD19/PDGFRB/JAK3/CCL5/FYN/DLG1/CTNNB1	13
BP	GO:0002714	positive regulation of B cell mediated immunity	4/233	41/18800	0.00162502	0.00547866	0.00268027	TGFB1/STAT6/PTPRC/TNF	4
BP	GO:0002891	positive regulation of immunoglobulin mediated immune response	4/233	41/18800	0.00162502	0.00547866	0.00268027	TGFB1/STAT6/PTPRC/TNF	4
BP	GO:0010591	regulation of lamellipodium assembly	4/233	41/18800	0.00162502	0.00547866	0.00268027	CDC42/RAC2/EPHA2/FSCN1	4
BP	GO:0045429	positive regulation of nitric oxide biosynthetic process	4/233	41/18800	0.00162502	0.00547866	0.00268027	PTK2B/TNF/SMAD3/PTX3	4
BP	GO:0150077	regulation of neuroinflammatory response	4/233	41/18800	0.00162502	0.00547866	0.00268027	PTPRC/TNF/MMP9/TNFRSF1B	4
BP	GO:0008544	epidermis development	12/233	355/18800	0.00165036	0.00555711	0.00271864	EPHA2/LAMA3/FGF7/LAMC2/LAMA5/TGFB2/TNF/BMP4/FZD3/FZD6/CTNNB1/SOX9	12
BP	GO:0032922	circadian regulation of gene expression	5/233	69/18800	0.00165229	0.00555711	0.00271864	RELB/CSNK1D/ID2/ID1/PPP1CB	5
BP	GO:0050922	negative regulation of chemotaxis	5/233	69/18800	0.00165229	0.00555711	0.00271864	GREM1/THBS1/ANGPT2/DUSP1/MMP28	5
BP	GO:0006913	nucleocytoplasmic transport	11/233	308/18800	0.00166309	0.00558438	0.00273199	TGFB1/TP53/TSC2/CDKN1A/HCLS1/BCL3/AXIN1/SMAD3/BMP4/TCF7L2/GAS6	11
BP	GO:0051169	nuclear transport	11/233	308/18800	0.00166309	0.00558438	0.00273199	TGFB1/TP53/TSC2/CDKN1A/HCLS1/BCL3/AXIN1/SMAD3/BMP4/TCF7L2/GAS6	11
BP	GO:0052126	movement in host environment	8/233	177/18800	0.00167308	0.0056134	0.00274618	EPHA2/AXL/ITGB1/ITGA2/ITGA5/ITGB7/GAS6/PTX3	8
BP	GO:0009799	specification of symmetry	7/233	139/18800	0.00175569	0.00588582	0.00287946	GREM1/SMAD3/TGFBR2/BMP4/SMAD2/CTNNB1/FOXF1	7
BP	GO:0002562	somatic diversification of immune receptors via germline recombination within a single locus	5/233	70/18800	0.00176171	0.00589649	0.00288468	TGFB1/STAT6/PTPRC/LEF1/TCF7	5
BP	GO:0016444	somatic cell DNA recombination	5/233	70/18800	0.00176171	0.00589649	0.00288468	TGFB1/STAT6/PTPRC/LEF1/TCF7	5
BP	GO:0014911	positive regulation of smooth muscle cell migration	4/233	42/18800	0.00177881	0.0059251	0.00289867	ITGA2/PDGFRB/MYC/CCL5	4
BP	GO:0031670	cellular response to nutrient	4/233	42/18800	0.00177881	0.0059251	0.00289867	SFRP1/COL1A1/SNAI2/GAS6	4
BP	GO:0031952	regulation of protein autophosphorylation	4/233	42/18800	0.00177881	0.0059251	0.00289867	GREM1/VEGFC/PTPRC/MOB1B	4
BP	GO:0045687	positive regulation of glial cell differentiation	4/233	42/18800	0.00177881	0.0059251	0.00289867	TGFB1/PTN/ID2/TNFRSF1B	4
BP	GO:0060964	regulation of gene silencing by miRNA	4/233	42/18800	0.00177881	0.0059251	0.00289867	TGFB1/TP53/TNF/BMP4	4
BP	GO:2000249	regulation of actin cytoskeleton reorganization	4/233	42/18800	0.00177881	0.0059251	0.00289867	CDC42/PTK2B/PDGFRA/HCLS1	4
BP	GO:0031330	negative regulation of cellular catabolic process	10/233	265/18800	0.00179261	0.00596629	0.00291882	TIMP1/TP53/TSC2/PIK3CG/EFNA1/TRAF2/IL10RA/AXIN2/ANXA2/FURIN	10
BP	GO:0030073	insulin secretion	8/233	179/18800	0.00179568	0.0059717	0.00292147	RAF1/SFRP1/SYT7/BAD/CCL5/TNF/SMAD2/TCF7L2	8
BP	GO:0050768	negative regulation of neurogenesis	7/233	140/18800	0.00182903	0.00606734	0.00296826	PTN/TP53/SPP1/TNF/BMPR1A/ID1/CTNNB1	7
BP	GO:1903305	regulation of regulated secretory pathway	7/233	140/18800	0.00182903	0.00606734	0.00296826	SPHK2/RAC2/SYT7/ITGB2/DVL1/FOXF1/PRKCB	7
BP	GO:0035455	response to interferon-alpha	3/233	20/18800	0.00183319	0.00606734	0.00296826	AXL/IFNAR2/GAS6	3
BP	GO:0043586	tongue development	3/233	20/18800	0.00183319	0.00606734	0.00296826	KIT/LEF1/CTNNB1	3
BP	GO:0045655	regulation of monocyte differentiation	3/233	20/18800	0.00183319	0.00606734	0.00296826	INPP5D/CSF1/MYC	3
BP	GO:0046629	gamma-delta T cell activation	3/233	20/18800	0.00183319	0.00606734	0.00296826	PTPRC/LEF1/TCF7	3
BP	GO:0090596	sensory organ morphogenesis	10/233	266/18800	0.00184288	0.00609455	0.00298157	MAPK1/EPHA2/BAX/FZD2/BMP4/FZD3/DVL1/FZD6/CTNNB1/SOX9	10
BP	GO:0007200	phospholipase C-activating G protein-coupled receptor signaling pathway	6/233	104/18800	0.00187746	0.00619904	0.00303269	S1PR1/TGM2/PTH1R/LPAR1/GNB1/CHRM1	6
BP	GO:0046822	regulation of nucleocytoplasmic transport	6/233	104/18800	0.00187746	0.00619904	0.00303269	TGFB1/HCLS1/SMAD3/BMP4/TCF7L2/GAS6	6
BP	GO:0050671	positive regulation of lymphocyte proliferation	7/233	141/18800	0.00190472	0.00627908	0.00307184	IL7/CDKN1A/JAK3/IL2RA/PTPRC/CCL5/TGFBR2	7
BP	GO:0070555	response to interleukin-1	7/233	141/18800	0.00190472	0.00627908	0.00307184	MMP2/SFRP1/MYC/IL1R1/CCL5/SOX9/ADAMTS7	7
BP	GO:0010721	negative regulation of cell development	8/233	181/18800	0.00192526	0.00634177	0.00310252	PTN/TP53/SPP1/TNF/BMPR1A/ID1/CTNNB1/FBLN1	8
BP	GO:1904407	positive regulation of nitric oxide metabolic process	4/233	43/18800	0.00194242	0.00639321	0.00312768	PTK2B/TNF/SMAD3/PTX3	4
BP	GO:0030510	regulation of BMP signaling pathway	6/233	105/18800	0.00197102	0.00646178	0.00316123	SFRP1/GREM1/FZD1/BMP4/SMAD2/SULF1	6
BP	GO:0045833	negative regulation of lipid metabolic process	6/233	105/18800	0.00197102	0.00646178	0.00316123	PIK3CG/PRKAA1/TNF/WNT4/SNAI2/SOX9	6
BP	GO:0071868	cellular response to monoamine stimulus	6/233	105/18800	0.00197102	0.00646178	0.00316123	MAPK1/TGM2/GNB1/GNG2/CHRM1/ID1	6
BP	GO:0071870	cellular response to catecholamine stimulus	6/233	105/18800	0.00197102	0.00646178	0.00316123	MAPK1/TGM2/GNB1/GNG2/CHRM1/ID1	6
BP	GO:1901890	positive regulation of cell junction assembly	6/233	105/18800	0.00197102	0.00646178	0.00316123	SFRP1/EPHA2/THBS2/WNT4/SMAD3/FLOT1	6
BP	GO:0003208	cardiac ventricle morphogenesis	5/233	72/18800	0.00199636	0.00652426	0.00319179	TGFB1/TGFB2/TGFBR2/BMPR1A/FOXF1	5
BP	GO:0014855	striated muscle cell proliferation	5/233	72/18800	0.00199636	0.00652426	0.00319179	RUNX1/TGFB2/SMAD1/TGFBR2/BMPR1A	5
BP	GO:0042246	tissue regeneration	5/233	72/18800	0.00199636	0.00652426	0.00319179	PTN/RUNX1/CDKN1A/FZD7/TGFBR2	5
BP	GO:0050810	regulation of steroid biosynthetic process	5/233	72/18800	0.00199636	0.00652426	0.00319179	PRKAA1/IGF1R/TNF/WNT4/SNAI2	5
BP	GO:2001056	positive regulation of cysteine-type endopeptidase activity	7/233	143/18800	0.00206337	0.00673796	0.00329634	BAX/BAD/MYC/TNF/FYN/SMAD3/BBC3	7
BP	GO:0042116	macrophage activation	6/233	106/18800	0.00206807	0.00674803	0.00330126	GPR137B/THBS1/PTPRC/TNF/NMI/ITGB2	6
BP	GO:0048286	lung alveolus development	4/233	44/18800	0.00211615	0.00685063	0.00335146	TGFB3/LTBP3/BMP4/FOXF1	4
BP	GO:0060147	regulation of posttranscriptional gene silencing	4/233	44/18800	0.00211615	0.00685063	0.00335146	TGFB1/TP53/TNF/BMP4	4
BP	GO:1900368	regulation of RNA interference	4/233	44/18800	0.00211615	0.00685063	0.00335146	TGFB1/TP53/TNF/BMP4	4
BP	GO:0003177	pulmonary valve development	3/233	21/18800	0.00211929	0.00685063	0.00335146	TGFB2/BMP4/TNFRSF1B	3
BP	GO:0033630	positive regulation of cell adhesion mediated by integrin	3/233	21/18800	0.00211929	0.00685063	0.00335146	RAC3/TGFB2/CCL5	3
BP	GO:0038083	peptidyl-tyrosine autophosphorylation	3/233	21/18800	0.00211929	0.00685063	0.00335146	PTK2B/GREM1/IGF1R	3
BP	GO:0043371	negative regulation of CD4-positive, alpha-beta T cell differentiation	3/233	21/18800	0.00211929	0.00685063	0.00335146	RUNX1/SOCS5/JAK3	3
BP	GO:0071404	cellular response to low-density lipoprotein particle stimulus	3/233	21/18800	0.00211929	0.00685063	0.00335146	SOCS5/ITGB1/ITGB2	3
BP	GO:0071498	cellular response to fluid shear stress	3/233	21/18800	0.00211929	0.00685063	0.00335146	PTK2B/MMP2/SOCS5	3
BP	GO:0072111	cell proliferation involved in kidney development	3/233	21/18800	0.00211929	0.00685063	0.00335146	PDGFRB/MYC/BMP4	3
BP	GO:0072243	metanephric nephron epithelium development	3/233	21/18800	0.00211929	0.00685063	0.00335146	WWTR1/WNT7B/SOX9	3
BP	GO:0090189	regulation of branching involved in ureteric bud morphogenesis	3/233	21/18800	0.00211929	0.00685063	0.00335146	GREM1/BMP4/SOX9	3
BP	GO:0051592	response to calcium ion	7/233	144/18800	0.00214643	0.00693296	0.00339174	PTK2B/SYT7/FOS/THBS1/BAD/PRKAA1/CCND1	7
BP	GO:0048588	developmental cell growth	9/233	227/18800	0.00215675	0.00696088	0.00340539	SPP1/LPAR3/ITGB1/FN1/ITGA4/TGFBR2/DVL1/CTNNB1/SOX9	9
BP	GO:0008637	apoptotic mitochondrial changes	6/233	107/18800	0.00216869	0.00698857	0.00341894	TP53/NOL3/BAX/BAD/BBC3/MMP9	6
BP	GO:0033138	positive regulation of peptidyl-serine phosphorylation	6/233	107/18800	0.00216869	0.00698857	0.00341894	RAF1/TGFB1/HCLS1/TNF/AXIN1/GAS6	6
BP	GO:0043270	positive regulation of ion transport	10/233	273/18800	0.00222756	0.00717271	0.00350903	SPHK2/BAX/ITGB1/CD19/CHRM1/PDGFRB/JAK3/CCL5/DLG1/CTSS	10
BP	GO:0050729	positive regulation of inflammatory response	7/233	145/18800	0.00223206	0.00717607	0.00351067	ADAM8/PIK3CG/ITGA2/OSMR/TNF/NMI/SERPINE1	7
BP	GO:0051961	negative regulation of nervous system development	7/233	145/18800	0.00223206	0.00717607	0.00351067	PTN/TP53/SPP1/TNF/BMPR1A/ID1/CTNNB1	7
BP	GO:0002637	regulation of immunoglobulin production	5/233	74/18800	0.00225305	0.00723237	0.00353822	TGFB1/TRAF2/STAT6/PTPRC/TNF	5
BP	GO:0035924	cellular response to vascular endothelial growth factor stimulus	5/233	74/18800	0.00225305	0.00723237	0.00353822	PDGFRA/VEGFC/VEGFB/PDGFRB/PIK3CD	5
BP	GO:0071867	response to monoamine	6/233	108/18800	0.00227296	0.00727943	0.00356124	MAPK1/TGM2/GNB1/GNG2/CHRM1/ID1	6
BP	GO:0071869	response to catecholamine	6/233	108/18800	0.00227296	0.00727943	0.00356124	MAPK1/TGM2/GNB1/GNG2/CHRM1/ID1	6
BP	GO:2000060	positive regulation of ubiquitin-dependent protein catabolic process	6/233	108/18800	0.00227296	0.00727943	0.00356124	PTK2/PTK2B/SOCS5/AXIN1/CSNK1D/DVL1	6
BP	GO:1902622	regulation of neutrophil migration	4/233	45/18800	0.00230031	0.00736134	0.00360131	RAC2/ADAM8/THBS4/IL1R1	4
BP	GO:0042445	hormone metabolic process	9/233	230/18800	0.00235643	0.00753097	0.00368429	CTSK/SPP1/PDGFRA/GNB3/IGF1R/AKR1B1/WNT4/TCF7L2/FURIN	9
BP	GO:0071706	tumor necrosis factor superfamily cytokine production	8/233	187/18800	0.00235875	0.00753097	0.00368429	SPHK2/TNFAIP3/ADAM8/AXL/THBS1/PTPRC/BCL3/GAS6	8
BP	GO:1903555	regulation of tumor necrosis factor superfamily cytokine production	8/233	187/18800	0.00235875	0.00753097	0.00368429	SPHK2/TNFAIP3/ADAM8/AXL/THBS1/PTPRC/BCL3/GAS6	8
BP	GO:0090263	positive regulation of canonical Wnt signaling pathway	6/233	109/18800	0.00238097	0.00759004	0.00371319	TGFB1/SFRP1/COL1A1/PPM1B/CSNK1D/SMAD3	6
BP	GO:0010822	positive regulation of mitochondrion organization	5/233	75/18800	0.00239003	0.00759004	0.00371319	TP53/BAX/BAD/BBC3/MMP9	5
BP	GO:0021536	diencephalon development	5/233	75/18800	0.00239003	0.00759004	0.00371319	BAX/MYC/WNT4/BMPR1A/BMP4	5
BP	GO:0043536	positive regulation of blood vessel endothelial cell migration	5/233	75/18800	0.00239003	0.00759004	0.00371319	TGFB1/FGFR1/THBS1/ANGPT4/VEGFC	5
BP	GO:0045685	regulation of glial cell differentiation	5/233	75/18800	0.00239003	0.00759004	0.00371319	TGFB1/PTN/ID2/CTNNB1/TNFRSF1B	5
BP	GO:0071479	cellular response to ionizing radiation	5/233	75/18800	0.00239003	0.00759004	0.00371319	TP53/SFRP1/CDKN1A/GADD45A/SNAI2	5
BP	GO:0120192	tight junction assembly	5/233	75/18800	0.00239003	0.00759004	0.00371319	EPHA2/TNF/SNAI2/PATJ/DLG1	5
BP	GO:0008202	steroid metabolic process	11/233	323/18800	0.00240952	0.00763976	0.00373752	PRLR/SPP1/PDGFRA/GNB3/KIT/PRKAA1/IGF1R/AKR1B1/TNF/WNT4/SNAI2	11
BP	GO:0001890	placenta development	7/233	147/18800	0.0024112	0.00763976	0.00373752	MAPK1/PTK2/PTN/SPP1/SOCS3/LEF1/WNT7B	7
BP	GO:0071322	cellular response to carbohydrate stimulus	7/233	147/18800	0.0024112	0.00763976	0.00373752	RAF1/BAD/MYC/PRKAA1/IGF1R/GAS6/PRKCB	7
BP	GO:0016358	dendrite development	9/233	231/18800	0.00242616	0.00765202	0.00374351	CDC42/PTN/ITGB1/LAMC2/EFNA1/FYN/DLG4/DVL1/ID1	9
BP	GO:0002089	lens morphogenesis in camera-type eye	3/233	22/18800	0.00243164	0.00765202	0.00374351	EPHA2/BMP4/CTNNB1	3
BP	GO:0010829	negative regulation of glucose transmembrane transport	3/233	22/18800	0.00243164	0.00765202	0.00374351	MYC/TNF/PRKCB	3
BP	GO:0060713	labyrinthine layer morphogenesis	3/233	22/18800	0.00243164	0.00765202	0.00374351	SOCS3/LEF1/WNT7B	3
BP	GO:0061042	vascular wound healing	3/233	22/18800	0.00243164	0.00765202	0.00374351	TNFAIP3/TNF/SERPINE1	3
BP	GO:0072574	hepatocyte proliferation	3/233	22/18800	0.00243164	0.00765202	0.00374351	PTN/TNFAIP3/TNF	3
BP	GO:0072575	epithelial cell proliferation involved in liver morphogenesis	3/233	22/18800	0.00243164	0.00765202	0.00374351	PTN/TNFAIP3/TNF	3
BP	GO:2000310	regulation of NMDA receptor activity	3/233	22/18800	0.00243164	0.00765202	0.00374351	PTK2B/CAPN1/DLG4	3
BP	GO:2000810	regulation of bicellular tight junction assembly	3/233	22/18800	0.00243164	0.00765202	0.00374351	EPHA2/TNF/SNAI2	3
BP	GO:0002824	positive regulation of adaptive immune response based on somatic recombination of immune receptors built from immunoglobulin superfamily domains	6/233	110/18800	0.00249279	0.00779897	0.0038154	TGFB1/IL1R1/TRAF2/STAT6/PTPRC/TNF	6
BP	GO:0048259	regulation of receptor-mediated endocytosis	6/233	110/18800	0.00249279	0.00779897	0.0038154	GREM1/ARRB1/SERPINE1/DLG4/FLOT1/ANXA2	6
BP	GO:1901222	regulation of NIK/NF-kappaB signaling	6/233	110/18800	0.00249279	0.00779897	0.0038154	GREM1/NOL3/PPM1B/TNF/BCL3/NMI	6
BP	GO:0001974	blood vessel remodeling	4/233	46/18800	0.00249522	0.00779897	0.0038154	TGFB1/NOL3/AXL/BAX	4
BP	GO:0045581	negative regulation of T cell differentiation	4/233	46/18800	0.00249522	0.00779897	0.0038154	RUNX1/SOCS5/JAK3/BMP4	4
BP	GO:0048806	genitalia development	4/233	46/18800	0.00249522	0.00779897	0.0038154	AXL/BAX/PDGFRA/CTNNB1	4
BP	GO:0060966	regulation of gene silencing by RNA	4/233	46/18800	0.00249522	0.00779897	0.0038154	TGFB1/TP53/TNF/BMP4	4
BP	GO:1900744	regulation of p38MAPK cascade	4/233	46/18800	0.00249522	0.00779897	0.0038154	DUSP1/GADD45A/BMP4/DLG1	4
BP	GO:1904707	positive regulation of vascular smooth muscle cell proliferation	4/233	46/18800	0.00249522	0.00779897	0.0038154	MMP2/TNF/BMPR1A/MMP9	4
BP	GO:0010821	regulation of mitochondrion organization	7/233	148/18800	0.00250483	0.00782312	0.00382722	TP53/NOL3/BAX/TSC2/BAD/BBC3/MMP9	7
BP	GO:0034765	regulation of ion transmembrane transport	14/233	476/18800	0.00255483	0.00797329	0.00390069	SPHK2/PTK2B/CAPN1/UBASH3B/BAX/PIK3CG/ITGB1/CD19/TNF/FYN/DLG4/DLG1/MMP9/CTSS	14
BP	GO:0043433	negative regulation of DNA-binding transcription factor activity	8/233	190/18800	0.00260242	0.00811572	0.00397037	TNFAIP3/ARRB1/BCL3/ID2/ID1/TCF7L2/FZD6/GAS6	8
BP	GO:0007346	regulation of mitotic cell cycle	14/233	478/18800	0.00265337	0.00826841	0.00404506	CDC42/TP53/CDKN1A/PDGFRB/MYC/DUSP1/TNF/CRLF3/BMP4/ID2/CCND1/FZD3/DLG1/CTNNB1	14
BP	GO:0006919	activation of cysteine-type endopeptidase activity involved in apoptotic process	5/233	77/18800	0.00268201	0.00833891	0.00407956	BAX/BAD/TNF/SMAD3/BBC3	5
BP	GO:0090559	regulation of membrane permeability	5/233	77/18800	0.00268201	0.00833891	0.00407956	TP53/NOL3/BAX/BAD/BBC3	5
BP	GO:1903201	regulation of oxidative stress-induced cell death	5/233	77/18800	0.00268201	0.00833891	0.00407956	NOL3/TNF/FYN/FZD1/CTNNB1	5
BP	GO:0051701	interaction with host	8/233	191/18800	0.00268788	0.00834855	0.00408427	EPHA2/AXL/ITGB1/ITGA2/ITGA5/ITGB7/GAS6/PTX3	8
BP	GO:0010976	positive regulation of neuron projection development	7/233	150/18800	0.00270045	0.00834855	0.00408427	PTN/PTK2B/ITGA6/IGF1R/FYN/FZD1/DVL1	7
BP	GO:0030902	hindbrain development	7/233	150/18800	0.00270045	0.00834855	0.00408427	TP53/ITGB1/IGF1R/LEF1/FZD4/SMAD1/CTNNB1	7
BP	GO:0002673	regulation of acute inflammatory response	4/233	47/18800	0.00270118	0.00834855	0.00408427	ADAM8/PIK3CG/OSMR/TNF	4
BP	GO:0045601	regulation of endothelial cell differentiation	4/233	47/18800	0.00270118	0.00834855	0.00408427	TNF/BMP4/ID1/CTNNB1	4
BP	GO:0060711	labyrinthine layer development	4/233	47/18800	0.00270118	0.00834855	0.00408427	MAPK1/SOCS3/LEF1/WNT7B	4
BP	GO:0090279	regulation of calcium ion import	4/233	47/18800	0.00270118	0.00834855	0.00408427	SPHK2/PDGFRB/FYN/CTNNB1	4
BP	GO:0097028	dendritic cell differentiation	4/233	47/18800	0.00270118	0.00834855	0.00408427	AXL/RELB/TGFBR2/GAS6	4
BP	GO:0010633	negative regulation of epithelial cell migration	6/233	112/18800	0.00272822	0.00842586	0.00412209	TGFB1/THBS1/ANGPT4/ANGPT2/GADD45A/TNF	6
BP	GO:0046879	hormone secretion	10/233	281/18800	0.00274374	0.0084675	0.00414246	RAF1/SFRP1/SYT7/SPP1/BAD/CCL5/TNF/FZD4/SMAD2/TCF7L2	10
BP	GO:0002689	negative regulation of leukocyte chemotaxis	3/233	23/18800	0.00277101	0.0084949	0.00415587	GREM1/DUSP1/MMP28	3
BP	GO:0030194	positive regulation of blood coagulation	3/233	23/18800	0.00277101	0.0084949	0.00415587	THBS1/SERPINE1/SERPINF2	3
BP	GO:0030728	ovulation	3/233	23/18800	0.00277101	0.0084949	0.00415587	MMP2/MYC/MMP19	3
BP	GO:0036303	lymph vessel morphogenesis	3/233	23/18800	0.00277101	0.0084949	0.00415587	EPHA2/VEGFC/PDPN	3
BP	GO:0060444	branching involved in mammary gland duct morphogenesis	3/233	23/18800	0.00277101	0.0084949	0.00415587	EPHA2/CSF1/WNT4	3
BP	GO:0060571	morphogenesis of an epithelial fold	3/233	23/18800	0.00277101	0.0084949	0.00415587	BMP4/CTNNB1/SULF1	3
BP	GO:0072576	liver morphogenesis	3/233	23/18800	0.00277101	0.0084949	0.00415587	PTN/TNFAIP3/TNF	3
BP	GO:1900048	positive regulation of hemostasis	3/233	23/18800	0.00277101	0.0084949	0.00415587	THBS1/SERPINE1/SERPINF2	3
BP	GO:1900120	regulation of receptor binding	3/233	23/18800	0.00277101	0.0084949	0.00415587	MMP9/LOX/ANXA2	3
BP	GO:0048638	regulation of developmental growth	11/233	329/18800	0.0027754	0.00849617	0.00415649	RUNX1/IL7/SOCS2/SPP1/LPAR3/FN1/CSF1/CDKN1A/TGFBR2/BMPR1A/BMP4	11
BP	GO:0045664	regulation of neuron differentiation	8/233	192/18800	0.00277551	0.00849617	0.00415649	RAC3/SFRP1/SOCS2/FGFR1/CSNK1D/BMP4/ID2/SOX9	8
BP	GO:0002526	acute inflammatory response	6/233	113/18800	0.002852	0.0087239	0.0042679	ADAM8/PIK3CG/FN1/OSMR/TNF/SERPINF2	6
BP	GO:0010543	regulation of platelet activation	4/233	48/18800	0.0029185	0.0089011	0.00435459	UBASH3B/PDGFRA/PDPN/ADAMTS18	4
BP	GO:0010761	fibroblast migration	4/233	48/18800	0.0029185	0.0089011	0.00435459	PTK2/TGFB1/THBS1/ITGB1	4
BP	GO:1901985	positive regulation of protein acetylation	4/233	48/18800	0.0029185	0.0089011	0.00435459	SPHK2/PRKAA1/ARRB1/SNAI2	4
BP	GO:1902108	regulation of mitochondrial membrane permeability involved in apoptotic process	4/233	48/18800	0.0029185	0.0089011	0.00435459	TP53/NOL3/BAX/BBC3	4
BP	GO:0098657	import into cell	9/233	238/18800	0.00296143	0.00902541	0.00441541	THBS1/ITGB1/ITGA4/TNF/IL10RA/FYN/ACTB/DLG1/FLOT1	9
BP	GO:0003014	renal system process	6/233	114/18800	0.00297994	0.00907518	0.00443975	AKR1B1/BMP4/SULF1/SERPINF2/GAS6/SULF2	6
BP	GO:0048708	astrocyte differentiation	5/233	79/18800	0.002999	0.00911986	0.00446161	MAPK1/TNF/ID2/LRP1/SOX9	5
BP	GO:0072332	intrinsic apoptotic signaling pathway by p53 class mediator	5/233	79/18800	0.002999	0.00911986	0.00446161	TP53/BAX/CDKN1A/MYC/BCL3	5
BP	GO:0032496	response to lipopolysaccharide	11/233	333/18800	0.00304333	0.0092479	0.00452425	MAPK1/TGFB1/TNFAIP3/AXL/FOS/RPS6KA3/CCL5/TNF/IL10RA/SERPINE1/TNFRSF1B	11
BP	GO:0002821	positive regulation of adaptive immune response	6/233	115/18800	0.00311212	0.00945004	0.00462314	TGFB1/IL1R1/TRAF2/STAT6/PTPRC/TNF	6
BP	GO:0097553	calcium ion transmembrane import into cytosol	7/233	154/18800	0.00312673	0.00945995	0.00462799	PTK2B/UBASH3B/NOL3/BAX/CD19/PTPRC/FYN	7
BP	GO:0002052	positive regulation of neuroblast proliferation	3/233	24/18800	0.00313815	0.00945995	0.00462799	VEGFC/FZD3/CTNNB1	3
BP	GO:0035162	embryonic hemopoiesis	3/233	24/18800	0.00313815	0.00945995	0.00462799	FLT3LG/KIT/TGFBR2	3
BP	GO:0036120	cellular response to platelet-derived growth factor stimulus	3/233	24/18800	0.00313815	0.00945995	0.00462799	PDGFRB/MYC/FYN	3
BP	GO:0042730	fibrinolysis	3/233	24/18800	0.00313815	0.00945995	0.00462799	THBS1/SERPINE1/SERPINF2	3
BP	GO:0045672	positive regulation of osteoclast differentiation	3/233	24/18800	0.00313815	0.00945995	0.00462799	FOS/CSF1/TNF	3
BP	GO:0050820	positive regulation of coagulation	3/233	24/18800	0.00313815	0.00945995	0.00462799	THBS1/SERPINE1/SERPINF2	3
BP	GO:0090103	cochlea morphogenesis	3/233	24/18800	0.00313815	0.00945995	0.00462799	FZD2/DVL1/SOX9	3
BP	GO:1904996	positive regulation of leukocyte adhesion to vascular endothelial cell	3/233	24/18800	0.00313815	0.00945995	0.00462799	ITGA4/TNF/ITGB2	3
BP	GO:2000637	positive regulation of gene silencing by miRNA	3/233	24/18800	0.00313815	0.00945995	0.00462799	TGFB1/TP53/BMP4	3
BP	GO:0043300	regulation of leukocyte degranulation	4/233	49/18800	0.00314747	0.00947433	0.00463502	SPHK2/RAC2/ITGB2/FOXF1	4
BP	GO:0097300	programmed necrotic cell death	4/233	49/18800	0.00314747	0.00947433	0.00463502	TP53/BAX/TRAF2/TNF	4
BP	GO:0002200	somatic diversification of immune receptors	5/233	80/18800	0.00316725	0.00952006	0.0046574	TGFB1/STAT6/PTPRC/LEF1/TCF7	5
BP	GO:0006029	proteoglycan metabolic process	5/233	80/18800	0.00316725	0.00952006	0.0046574	TCF7L2/CTNNB1/SULF1/SULF2/ADAMTS7	5
BP	GO:0021675	nerve development	5/233	81/18800	0.00334219	0.0100386	0.0049111	ERBB3/ITGA4/CTNNB1/SULF1/SULF2	5
BP	GO:0032873	negative regulation of stress-activated MAPK cascade	4/233	50/18800	0.0033884	0.010137	0.00495921	SFRP1/MYC/DUSP1/DLG1	4
BP	GO:0070303	negative regulation of stress-activated protein kinase signaling cascade	4/233	50/18800	0.0033884	0.010137	0.00495921	SFRP1/MYC/DUSP1/DLG1	4
BP	GO:0002708	positive regulation of lymphocyte mediated immunity	6/233	117/18800	0.00338956	0.010137	0.00495921	TGFB1/IL1R1/TRAF2/STAT6/PTPRC/TNF	6
BP	GO:0007006	mitochondrial membrane organization	6/233	117/18800	0.00338956	0.010137	0.00495921	TP53/NOL3/BAX/BAD/MYC/BBC3	6
BP	GO:0042752	regulation of circadian rhythm	6/233	117/18800	0.00338956	0.010137	0.00495921	TP53/PRKAA1/CSNK1D/FBXW11/ID2/PPP1CB	6
BP	GO:0045446	endothelial cell differentiation	6/233	117/18800	0.00338956	0.010137	0.00495921	S1PR1/TNF/BMP4/ID1/CTNNB1/PDPN	6
BP	GO:0009914	hormone transport	10/233	290/18800	0.00343453	0.0102641	0.00502139	RAF1/SFRP1/SYT7/SPP1/BAD/CCL5/TNF/FZD4/SMAD2/TCF7L2	10
BP	GO:0031960	response to corticosteroid	7/233	157/18800	0.00347882	0.010389	0.00508249	FOS/COL1A1/BAD/IGF1R/TNF/WNT7B/CCND1	7
BP	GO:0033081	regulation of T cell differentiation in thymus	3/233	25/18800	0.00353375	0.0104814	0.00512772	ADAM8/IL7R/BMP4	3
BP	GO:0036119	response to platelet-derived growth factor	3/233	25/18800	0.00353375	0.0104814	0.00512772	PDGFRB/MYC/FYN	3
BP	GO:0046639	negative regulation of alpha-beta T cell differentiation	3/233	25/18800	0.00353375	0.0104814	0.00512772	RUNX1/SOCS5/JAK3	3
BP	GO:0048668	collateral sprouting	3/233	25/18800	0.00353375	0.0104814	0.00512772	SPP1/LPAR3/DVL1	3
BP	GO:0060148	positive regulation of posttranscriptional gene silencing	3/233	25/18800	0.00353375	0.0104814	0.00512772	TGFB1/TP53/BMP4	3
BP	GO:0062149	NA	3/233	25/18800	0.00353375	0.0104814	0.00512772	ITGA2/TNF/FYN	3
BP	GO:1900370	positive regulation of RNA interference	3/233	25/18800	0.00353375	0.0104814	0.00512772	TGFB1/TP53/BMP4	3
BP	GO:1905048	regulation of metallopeptidase activity	3/233	25/18800	0.00353375	0.0104814	0.00512772	TIMP1/ANTXR1/LRP1	3
BP	GO:2000463	positive regulation of excitatory postsynaptic potential	3/233	25/18800	0.00353375	0.0104814	0.00512772	PTK2B/DLG4/DVL1	3
BP	GO:0071346	cellular response to interferon-gamma	6/233	118/18800	0.00353499	0.0104814	0.00512772	CDC42/TP53/MYC/CCL5/TNF/NMI	6
BP	GO:0008347	glial cell migration	4/233	51/18800	0.00364158	0.0107898	0.00527856	MMP14/CSF1/TGFB2/CTNNB1	4
BP	GO:0051928	positive regulation of calcium ion transport	6/233	119/18800	0.00368502	0.0109107	0.00533772	SPHK2/BAX/CD19/PDGFRB/JAK3/CCL5	6
BP	GO:0002064	epithelial cell development	8/233	203/18800	0.00389422	0.0115219	0.00563674	EPHA2/BAD/AKR1B1/TNF/WNT7B/FRMD6/BMP4/SOX9	8
BP	GO:0038093	Fc receptor signaling pathway	4/233	52/18800	0.00390729	0.0115319	0.00564162	PTK2/KIT/PTPRC/FYN	4
BP	GO:1902930	regulation of alcohol biosynthetic process	4/233	52/18800	0.00390729	0.0115319	0.00564162	PTK2B/PTH1R/PRKAA1/WNT4	4
BP	GO:0035050	embryonic heart tube development	5/233	84/18800	0.00390869	0.0115319	0.00564162	CDC42/SMAD3/TEAD2/TGFBR2/CTNNB1	5
BP	GO:1900182	positive regulation of protein localization to nucleus	5/233	84/18800	0.00390869	0.0115319	0.00564162	TGFB1/HCLS1/FYN/WWTR1/SMAD3	5
BP	GO:0002407	dendritic cell chemotaxis	3/233	26/18800	0.00395849	0.0115965	0.00567324	PIK3CG/CCL5/GAS6	3
BP	GO:0002433	immune response-regulating cell surface receptor signaling pathway involved in phagocytosis	3/233	26/18800	0.00395849	0.0115965	0.00567324	PTK2/PTPRC/FYN	3
BP	GO:0003094	glomerular filtration	3/233	26/18800	0.00395849	0.0115965	0.00567324	SULF1/GAS6/SULF2	3
BP	GO:0010954	positive regulation of protein processing	3/233	26/18800	0.00395849	0.0115965	0.00567324	MMP14/ADAM8/ANXA2	3
BP	GO:0030878	thyroid gland development	3/233	26/18800	0.00395849	0.0115965	0.00567324	MAPK1/RAF1/SMAD3	3
BP	GO:0038096	Fc-gamma receptor signaling pathway involved in phagocytosis	3/233	26/18800	0.00395849	0.0115965	0.00567324	PTK2/PTPRC/FYN	3
BP	GO:0043931	ossification involved in bone maturation	3/233	26/18800	0.00395849	0.0115965	0.00567324	GREM1/THBS3/ADAMTS7	3
BP	GO:0050995	negative regulation of lipid catabolic process	3/233	26/18800	0.00395849	0.0115965	0.00567324	PIK3CG/PRKAA1/TNF	3
BP	GO:0051894	positive regulation of focal adhesion assembly	3/233	26/18800	0.00395849	0.0115965	0.00567324	SFRP1/WNT4/SMAD3	3
BP	GO:0060384	innervation	3/233	26/18800	0.00395849	0.0115965	0.00567324	ITGA4/SULF1/SULF2	3
BP	GO:0051209	release of sequestered calcium ion into cytosol	6/233	121/18800	0.00399917	0.0117074	0.0057275	PTK2B/UBASH3B/NOL3/BAX/CD19/PTPRC	6
BP	GO:0046889	positive regulation of lipid biosynthetic process	5/233	85/18800	0.00411191	0.012029	0.00588481	SPHK2/PRKAA1/IGF1R/TNF/WNT4	5
BP	GO:0032869	cellular response to insulin stimulus	8/233	205/18800	0.00413047	0.0120748	0.00590723	PDK4/SHC1/TSC2/MYC/PRKAA1/IGF1R/SOCS3/PRKCB	8
BP	GO:0051283	negative regulation of sequestering of calcium ion	6/233	122/18800	0.00416349	0.0121542	0.00594608	PTK2B/UBASH3B/NOL3/BAX/CD19/PTPRC	6
BP	GO:0071901	negative regulation of protein serine/threonine kinase activity	6/233	122/18800	0.00416349	0.0121542	0.00594608	TNFAIP3/SFRP1/CDKN1A/DUSP1/GADD45A/BMP4	6
BP	GO:0048260	positive regulation of receptor-mediated endocytosis	4/233	53/18800	0.00418583	0.0122109	0.0059738	GREM1/ARRB1/SERPINE1/ANXA2	4
BP	GO:0007281	germ cell development	10/233	299/18800	0.00425708	0.01241	0.00607122	PTN/PTK2B/BAX/ANGPT2/KIT/WNT4/FBXW11/BMP4/CTNNB1/PTX3	10
BP	GO:0007568	aging	7/233	163/18800	0.00427285	0.0124473	0.00608944	TIMP1/TGFB3/MMP2/FOS/PDGFRB/TGFBR2/TNFRSF1B	7
BP	GO:2000134	negative regulation of G1/S transition of mitotic cell cycle	5/233	86/18800	0.00432256	0.0125833	0.00615597	TP53/CDKN1A/CRLF3/CCND1/DLG1	5
BP	GO:0010906	regulation of glucose metabolic process	6/233	123/18800	0.00433274	0.0125952	0.00616184	PDK4/TP53/BAD/GNB3/MST1/PPP1CB	6
BP	GO:0042471	ear morphogenesis	6/233	123/18800	0.00433274	0.0125952	0.00616184	MAPK1/FZD2/FZD3/DVL1/FZD6/SOX9	6
BP	GO:0031647	regulation of protein stability	10/233	300/18800	0.00435732	0.0126579	0.00619246	MAPK1/TP53/EFNA1/NF2/SMAD3/DVL3/FBXW11/DVL1/CRTAP/FLOT1	10
BP	GO:0003401	axis elongation	3/233	27/18800	0.00441299	0.0127749	0.00624974	SFRP1/BMP4/SOX9	3
BP	GO:0018126	protein hydroxylation	3/233	27/18800	0.00441299	0.0127749	0.00624974	P3H4/FKBP10/CRTAP	3
BP	GO:0060669	embryonic placenta morphogenesis	3/233	27/18800	0.00441299	0.0127749	0.00624974	SOCS3/LEF1/WNT7B	3
BP	GO:0097205	renal filtration	3/233	27/18800	0.00441299	0.0127749	0.00624974	SULF1/GAS6/SULF2	3
BP	GO:1902932	positive regulation of alcohol biosynthetic process	3/233	27/18800	0.00441299	0.0127749	0.00624974	PTH1R/PRKAA1/WNT4	3
BP	GO:0001764	neuron migration	7/233	164/18800	0.00441751	0.0127791	0.00625179	AXL/BAX/FGFR1/FYN/FZD3/CTNNB1/GAS6	7
BP	GO:0043254	regulation of protein complex assembly	12/233	401/18800	0.00443711	0.0128269	0.00627516	CDC42/RAF1/TGFB1/PTK2B/TP53/BAX/TRAF2/HCLS1/TNF/DLG1/FSCN1/SOX9	12
BP	GO:0045661	regulation of myoblast differentiation	4/233	54/18800	0.00447748	0.0129077	0.00631469	TGFB1/TNF/BMP4/SOX9	4
BP	GO:0051155	positive regulation of striated muscle cell differentiation	4/233	54/18800	0.00447748	0.0129077	0.00631469	MMP14/TGFB1/GREM1/BMP4	4
BP	GO:0061900	glial cell activation	4/233	54/18800	0.00447748	0.0129077	0.00631469	PTPRC/TNF/ITGB2/LRP1	4
BP	GO:1903202	negative regulation of oxidative stress-induced cell death	4/233	54/18800	0.00447748	0.0129077	0.00631469	NOL3/FYN/FZD1/CTNNB1	4
BP	GO:0030218	erythrocyte differentiation	6/233	124/18800	0.00450702	0.0129659	0.00634315	INPP5D/KIT/JAK3/HCLS1/BMP4/ID2	6
BP	GO:0042177	negative regulation of protein catabolic process	6/233	124/18800	0.00450702	0.0129659	0.00634315	TIMP1/EFNA1/FYN/SMAD3/ANXA2/FURIN	6
BP	GO:0051282	regulation of sequestering of calcium ion	6/233	124/18800	0.00450702	0.0129659	0.00634315	PTK2B/UBASH3B/NOL3/BAX/CD19/PTPRC	6
BP	GO:0010038	response to metal ion	11/233	351/18800	0.00451833	0.0129894	0.00635468	MAPK1/PTK2B/SYT7/FOS/THBS1/BAD/KIT/PRKAA1/DLG4/CCND1/MMP9	11
BP	GO:0043122	regulation of I-kappaB kinase/NF-kappaB signaling	9/233	254/18800	0.00453612	0.0130316	0.00637529	SPHK2/TNFAIP3/LPAR1/TRAF2/PPM1B/TNF/FYN/CTNNB1/PRKCB	9
BP	GO:0051100	negative regulation of binding	7/233	165/18800	0.00456583	0.0131079	0.00641261	BAX/ITGA4/CDKN1A/LEF1/ACTB/DVL1/ID1	7
BP	GO:0050807	regulation of synapse organization	8/233	209/18800	0.00463603	0.0133002	0.00650671	CDC42/EFNA1/THBS2/TNF/IL10RA/FYN/YWHAZ/FZD1	8
BP	GO:0043280	positive regulation of cysteine-type endopeptidase activity involved in apoptotic process	6/233	125/18800	0.00468642	0.0134262	0.00656836	BAX/BAD/MYC/TNF/SMAD3/BBC3	6
BP	GO:0050868	negative regulation of T cell activation	6/233	125/18800	0.00468642	0.0134262	0.00656836	RUNX1/SOCS5/JAK3/IL2RA/BMP4/DLG1	6
BP	GO:0002709	regulation of T cell mediated immunity	5/233	88/18800	0.00476677	0.0136423	0.00667409	IL7R/IL1R1/TRAF2/PTPRC/TNFRSF1B	5
BP	GO:0017038	protein import	8/233	210/18800	0.00476955	0.0136423	0.00667409	TGFB1/TP53/TSC2/CDKN1A/HCLS1/BCL3/SMAD3/BMP4	8
BP	GO:0071216	cellular response to biotic stimulus	9/233	256/18800	0.0047717	0.0136423	0.00667409	MAPK1/TGFB1/TNFAIP3/TP53/AXL/CCL5/TNF/SERPINE1/TNFRSF1B	9
BP	GO:0043470	regulation of carbohydrate catabolic process	4/233	55/18800	0.00478251	0.0136545	0.00668002	TP53/MYC/PRKAA1/PPP1CB	4
BP	GO:0048008	platelet-derived growth factor receptor signaling pathway	4/233	55/18800	0.00478251	0.0136545	0.00668002	PDGFRA/PDGFRB/LOX/LRP1	4
BP	GO:0002237	response to molecule of bacterial origin	11/233	354/18800	0.00481173	0.0137284	0.00671622	MAPK1/TGFB1/TNFAIP3/AXL/FOS/RPS6KA3/CCL5/TNF/IL10RA/SERPINE1/TNFRSF1B	11
BP	GO:0003015	heart process	9/233	257/18800	0.004893	0.0138883	0.00679444	CDC42/PIK3CG/VEGFB/TGFB2/TNF/FYN/WWTR1/DLG1/HBEGF	9
BP	GO:0002360	T cell lineage commitment	3/233	28/18800	0.00489784	0.0138883	0.00679444	TP53/IL7/STAT6	3
BP	GO:0010592	positive regulation of lamellipodium assembly	3/233	28/18800	0.00489784	0.0138883	0.00679444	CDC42/RAC2/FSCN1	3
BP	GO:0010800	positive regulation of peptidyl-threonine phosphorylation	3/233	28/18800	0.00489784	0.0138883	0.00679444	MAPK1/TGFB1/AXIN1	3
BP	GO:0010818	T cell chemotaxis	3/233	28/18800	0.00489784	0.0138883	0.00679444	PIK3CG/PIK3CD/CCL5	3
BP	GO:0045830	positive regulation of isotype switching	3/233	28/18800	0.00489784	0.0138883	0.00679444	TGFB1/STAT6/PTPRC	3
BP	GO:0070723	response to cholesterol	3/233	28/18800	0.00489784	0.0138883	0.00679444	TGFB1/TGFBR2/SMAD2	3
BP	GO:0090330	regulation of platelet aggregation	3/233	28/18800	0.00489784	0.0138883	0.00679444	UBASH3B/PDPN/ADAMTS18	3
BP	GO:1903319	positive regulation of protein maturation	3/233	28/18800	0.00489784	0.0138883	0.00679444	MMP14/ADAM8/ANXA2	3
BP	GO:0050890	cognition	10/233	306/18800	0.00499855	0.0141508	0.00692285	MAPK1/PTN/FOS/ITGB1/CHRM1/ITGA5/KIT/TNF/FYN/DLG4	10
BP	GO:0051591	response to cAMP	5/233	89/18800	0.00500061	0.0141508	0.00692285	PTK2B/FOS/PIK3CG/COL1A1/MMP19	5
BP	GO:1903578	regulation of ATP metabolic process	5/233	89/18800	0.00500061	0.0141508	0.00692285	SPHK2/TP53/MYC/PRKAA1/TNF	5
BP	GO:0003229	ventricular cardiac muscle tissue development	4/233	56/18800	0.00510119	0.0144256	0.00705729	TGFB1/TGFB2/BMPR1A/ID2	4
BP	GO:0006887	exocytosis	11/233	357/18800	0.00512005	0.0144691	0.00707856	SPHK2/RAC2/SYT7/PIK3CG/KIT/PIK3CD/CCL5/ITGB2/DVL1/FOXF1/PRKCB	11
BP	GO:0032868	response to insulin	9/233	259/18800	0.00514279	0.0145235	0.00710518	PDK4/SHC1/TSC2/MYC/PRKAA1/IGF1R/MAX/SOCS3/PRKCB	9
BP	GO:0051208	sequestering of calcium ion	6/233	128/18800	0.00525618	0.0148336	0.00725689	PTK2B/UBASH3B/NOL3/BAX/CD19/PTPRC	6
BP	GO:0002825	regulation of T-helper 1 type immune response	3/233	29/18800	0.00541358	0.0151544	0.00741381	SOCS5/JAK3/IL1R1	3
BP	GO:0003156	regulation of animal organ formation	3/233	29/18800	0.00541358	0.0151544	0.00741381	BMP4/CTNNB1/SULF1	3
BP	GO:0010453	regulation of cell fate commitment	3/233	29/18800	0.00541358	0.0151544	0.00741381	FZD7/BMPR1A/BMP4	3
BP	GO:0010575	positive regulation of vascular endothelial growth factor production	3/233	29/18800	0.00541358	0.0151544	0.00741381	TGFB1/SULF1/SULF2	3
BP	GO:0031571	mitotic G1 DNA damage checkpoint	3/233	29/18800	0.00541358	0.0151544	0.00741381	TP53/CDKN1A/CCND1	3
BP	GO:0043153	entrainment of circadian clock by photoperiod	3/233	29/18800	0.00541358	0.0151544	0.00741381	TP53/ID2/PPP1CB	3
BP	GO:0048265	response to pain	3/233	29/18800	0.00541358	0.0151544	0.00741381	THBS4/THBS1/LPAR5	3
BP	GO:0051491	positive regulation of filopodium assembly	3/233	29/18800	0.00541358	0.0151544	0.00741381	CDC42/TGFB3/FSCN1	3
BP	GO:0060037	pharyngeal system development	3/233	29/18800	0.00541358	0.0151544	0.00741381	TGFB2/BMPR1A/BMP4	3
BP	GO:0070977	bone maturation	3/233	29/18800	0.00541358	0.0151544	0.00741381	GREM1/THBS3/ADAMTS7	3
BP	GO:0097421	liver regeneration	3/233	29/18800	0.00541358	0.0151544	0.00741381	MYC/TNF/CCND1	3
BP	GO:1903203	regulation of oxidative stress-induced neuron death	3/233	29/18800	0.00541358	0.0151544	0.00741381	TNF/FZD1/CTNNB1	3
BP	GO:0010803	regulation of tumor necrosis factor-mediated signaling pathway	4/233	57/18800	0.0054338	0.0151599	0.00741653	TNFAIP3/NOL3/TRAF2/GAS6	4
BP	GO:0032608	interferon-beta production	4/233	57/18800	0.0054338	0.0151599	0.00741653	PPM1B/RELB/NMI/FLOT1	4
BP	GO:0032648	regulation of interferon-beta production	4/233	57/18800	0.0054338	0.0151599	0.00741653	PPM1B/RELB/NMI/FLOT1	4
BP	GO:0038066	p38MAPK cascade	4/233	57/18800	0.0054338	0.0151599	0.00741653	DUSP1/GADD45A/BMP4/DLG1	4
BP	GO:0042306	regulation of protein import into nucleus	4/233	57/18800	0.0054338	0.0151599	0.00741653	TGFB1/HCLS1/SMAD3/BMP4	4
BP	GO:0050803	regulation of synapse structure or activity	8/233	215/18800	0.00548193	0.015284	0.00747721	CDC42/EFNA1/THBS2/TNF/IL10RA/FYN/YWHAZ/FZD1	8
BP	GO:0090398	cellular senescence	5/233	91/18800	0.00549251	0.0153032	0.00748661	TP53/CDKN1A/IGF1R/BMPR1A/ID2	5
BP	GO:0060402	calcium ion transport into cytosol	7/233	171/18800	0.00553617	0.0154145	0.00754108	PTK2B/UBASH3B/NOL3/BAX/CD19/PTPRC/FYN	7
BP	GO:0032635	interleukin-6 production	7/233	172/18800	0.00571184	0.0158824	0.00776996	SPHK2/TNFAIP3/INPP5D/SOCS5/ARRB1/TNF/GAS6	7
BP	GO:0032675	regulation of interleukin-6 production	7/233	172/18800	0.00571184	0.0158824	0.00776996	SPHK2/TNFAIP3/INPP5D/SOCS5/ARRB1/TNF/GAS6	7
BP	GO:0002011	morphogenesis of an epithelial sheet	4/233	58/18800	0.0057806	0.0160307	0.0078425	ITGA5/DVL1/PDPN/HBEGF	4
BP	GO:0010559	regulation of glycoprotein biosynthetic process	4/233	58/18800	0.0057806	0.0160307	0.0078425	JAK3/TCF7L2/CTNNB1/HBEGF	4
BP	GO:0060135	maternal process involved in female pregnancy	4/233	58/18800	0.0057806	0.0160307	0.0078425	PTN/SPP1/ANGPT2/WNT4	4
BP	GO:0060997	dendritic spine morphogenesis	4/233	58/18800	0.0057806	0.0160307	0.0078425	CDC42/EFNA1/DLG4/DVL1	4
BP	GO:0071222	cellular response to lipopolysaccharide	8/233	217/18800	0.00578858	0.0160421	0.0078481	MAPK1/TGFB1/TNFAIP3/AXL/CCL5/TNF/SERPINE1/TNFRSF1B	8
BP	GO:0050853	B cell receptor signaling pathway	6/233	131/18800	0.00587514	0.0162711	0.00796015	MAPK1/BAX/CD19/PIK3CD/PTPRC/PRKCB	6
BP	GO:0001945	lymph vessel development	3/233	30/18800	0.00596074	0.0164207	0.00803331	EPHA2/VEGFC/PDPN	3
BP	GO:0007176	regulation of epidermal growth factor-activated receptor activity	3/233	30/18800	0.00596074	0.0164207	0.00803331	SHC1/SOCS5/HBEGF	3
BP	GO:0031069	hair follicle morphogenesis	3/233	30/18800	0.00596074	0.0164207	0.00803331	FGF7/TGFB2/CTNNB1	3
BP	GO:0038094	Fc-gamma receptor signaling pathway	3/233	30/18800	0.00596074	0.0164207	0.00803331	PTK2/PTPRC/FYN	3
BP	GO:0044819	mitotic G1/S transition checkpoint	3/233	30/18800	0.00596074	0.0164207	0.00803331	TP53/CDKN1A/CCND1	3
BP	GO:0060251	regulation of glial cell proliferation	3/233	30/18800	0.00596074	0.0164207	0.00803331	CHRM1/MYC/TNF	3
BP	GO:0060603	mammary gland duct morphogenesis	3/233	30/18800	0.00596074	0.0164207	0.00803331	EPHA2/CSF1/WNT4	3
BP	GO:1903019	negative regulation of glycoprotein metabolic process	3/233	30/18800	0.00596074	0.0164207	0.00803331	JAK3/PTX3/HBEGF	3
BP	GO:0070588	calcium ion transmembrane transport	10/233	314/18800	0.00596631	0.0164251	0.00803548	PTK2B/UBASH3B/NOL3/BAX/PIK3CG/CD19/PTPRC/FYN/GAS6/ANXA2	10
BP	GO:0002449	lymphocyte mediated immunity	11/233	365/18800	0.00601923	0.0165599	0.0081014	TGFB1/INPP5D/IL7R/CD19/IL1R1/TRAF2/STAT6/PTPRC/TNF/BCL3/TNFRSF1B	11
BP	GO:0001755	neural crest cell migration	4/233	59/18800	0.00614184	0.0168637	0.00825005	CDC42/FN1/LAMA5/BMP4	4
BP	GO:0002886	regulation of myeloid leukocyte mediated immunity	4/233	59/18800	0.00614184	0.0168637	0.00825005	SPHK2/RAC2/ITGB2/FOXF1	4
BP	GO:0046686	response to cadmium ion	4/233	59/18800	0.00614184	0.0168637	0.00825005	MAPK1/FOS/KIT/MMP9	4
BP	GO:0006694	steroid biosynthetic process	7/233	175/18800	0.00626393	0.0171762	0.00840294	PRLR/PRKAA1/IGF1R/AKR1B1/TNF/WNT4/SNAI2	7
BP	GO:0046890	regulation of lipid biosynthetic process	7/233	175/18800	0.00626393	0.0171762	0.00840294	SPHK2/PDK4/PRKAA1/IGF1R/TNF/WNT4/SNAI2	7
BP	GO:0030072	peptide hormone secretion	8/233	220/18800	0.00627285	0.0171894	0.00840936	RAF1/SFRP1/SYT7/BAD/CCL5/TNF/SMAD2/TCF7L2	8
BP	GO:0003158	endothelium development	6/233	133/18800	0.0063163	0.017297	0.00846202	S1PR1/TNF/BMP4/ID1/CTNNB1/PDPN	6
BP	GO:0071241	cellular response to inorganic substance	8/233	221/18800	0.00644093	0.0173772	0.00850125	MAPK1/SYT7/FOS/BAD/PRKAA1/TRAF2/DLG4/MMP9	8
BP	GO:0001542	ovulation from ovarian follicle	2/233	10/18800	0.0064459	0.0173772	0.00850125	MMP2/MMP19	2
BP	GO:0001915	negative regulation of T cell mediated cytotoxicity	2/233	10/18800	0.0064459	0.0173772	0.00850125	IL7R/PTPRC	2
BP	GO:0003183	mitral valve morphogenesis	2/233	10/18800	0.0064459	0.0173772	0.00850125	EFNA1/BMPR1A	2
BP	GO:0003253	cardiac neural crest cell migration involved in outflow tract morphogenesis	2/233	10/18800	0.0064459	0.0173772	0.00850125	CDC42/BMP4	2
BP	GO:0007191	adenylate cyclase-activating dopamine receptor signaling pathway	2/233	10/18800	0.0064459	0.0173772	0.00850125	GNB1/GNG2	2
BP	GO:0033079	immature T cell proliferation	2/233	10/18800	0.0064459	0.0173772	0.00850125	WNT4/BMP4	2
BP	GO:0033089	positive regulation of T cell differentiation in thymus	2/233	10/18800	0.0064459	0.0173772	0.00850125	ADAM8/IL7R	2
BP	GO:0033327	Leydig cell differentiation	2/233	10/18800	0.0064459	0.0173772	0.00850125	PDGFRA/CCND1	2
BP	GO:0035457	cellular response to interferon-alpha	2/233	10/18800	0.0064459	0.0173772	0.00850125	AXL/GAS6	2
BP	GO:0035860	glial cell-derived neurotrophic factor receptor signaling pathway	2/233	10/18800	0.0064459	0.0173772	0.00850125	SULF1/SULF2	2
BP	GO:0042368	vitamin D biosynthetic process	2/233	10/18800	0.0064459	0.0173772	0.00850125	TNF/SNAI2	2
BP	GO:0045625	regulation of T-helper 1 cell differentiation	2/233	10/18800	0.0064459	0.0173772	0.00850125	SOCS5/JAK3	2
BP	GO:0048263	determination of dorsal identity	2/233	10/18800	0.0064459	0.0173772	0.00850125	GREM1/CTNNB1	2
BP	GO:0060068	vagina development	2/233	10/18800	0.0064459	0.0173772	0.00850125	AXL/BAX	2
BP	GO:0060397	JAK-STAT cascade involved in growth hormone signaling pathway	2/233	10/18800	0.0064459	0.0173772	0.00850125	JAK3/STAT6	2
BP	GO:0060536	cartilage morphogenesis	2/233	10/18800	0.0064459	0.0173772	0.00850125	SNAI2/WNT7B	2
BP	GO:0060767	epithelial cell proliferation involved in prostate gland development	2/233	10/18800	0.0064459	0.0173772	0.00850125	CTNNB1/SOX9	2
BP	GO:0072173	metanephric tubule morphogenesis	2/233	10/18800	0.0064459	0.0173772	0.00850125	WNT4/SOX9	2
BP	GO:0072203	cell proliferation involved in metanephros development	2/233	10/18800	0.0064459	0.0173772	0.00850125	PDGFRB/MYC	2
BP	GO:1904338	regulation of dopaminergic neuron differentiation	2/233	10/18800	0.0064459	0.0173772	0.00850125	SFRP1/CSNK1D	2
BP	GO:2000018	regulation of male gonad development	2/233	10/18800	0.0064459	0.0173772	0.00850125	WNT4/SOX9	2
BP	GO:2000647	negative regulation of stem cell proliferation	2/233	10/18800	0.0064459	0.0173772	0.00850125	SNAI2/FBLN1	2
BP	GO:2001269	positive regulation of cysteine-type endopeptidase activity involved in apoptotic signaling pathway	2/233	10/18800	0.0064459	0.0173772	0.00850125	BAX/SMAD3	2
BP	GO:0002221	pattern recognition receptor signaling pathway	7/233	176/18800	0.00645652	0.0173945	0.00850973	TNFAIP3/PIK3AP1/RPS6KA3/TNF/NMI/CTSS/FLOT1	7
BP	GO:0055008	cardiac muscle tissue morphogenesis	4/233	60/18800	0.00651779	0.0174762	0.00854969	TGFB1/S1PR1/TGFB2/BMPR1A	4
BP	GO:0002507	tolerance induction	3/233	31/18800	0.0065398	0.0174762	0.00854969	TNFAIP3/IL2RA/TGFBR2	3
BP	GO:0033137	negative regulation of peptidyl-serine phosphorylation	3/233	31/18800	0.0065398	0.0174762	0.00854969	BAX/GADD45A/INPP5F	3
BP	GO:0035066	positive regulation of histone acetylation	3/233	31/18800	0.0065398	0.0174762	0.00854969	SPHK2/ARRB1/SNAI2	3
BP	GO:0060055	angiogenesis involved in wound healing	3/233	31/18800	0.0065398	0.0174762	0.00854969	TNFAIP3/TNF/SERPINE1	3
BP	GO:0061384	heart trabecula morphogenesis	3/233	31/18800	0.0065398	0.0174762	0.00854969	S1PR1/TGFB2/BMPR1A	3
BP	GO:0150117	NA	3/233	31/18800	0.0065398	0.0174762	0.00854969	SFRP1/WNT4/SMAD3	3
BP	GO:1902042	negative regulation of extrinsic apoptotic signaling pathway via death domain receptors	3/233	31/18800	0.0065398	0.0174762	0.00854969	RAF1/TNFAIP3/SERPINE1	3
BP	GO:2000406	positive regulation of T cell migration	3/233	31/18800	0.0065398	0.0174762	0.00854969	ADAM8/ITGA4/CCL5	3
BP	GO:2000515	negative regulation of CD4-positive, alpha-beta T cell activation	3/233	31/18800	0.0065398	0.0174762	0.00854969	RUNX1/SOCS5/JAK3	3
BP	GO:2000648	positive regulation of stem cell proliferation	3/233	31/18800	0.0065398	0.0174762	0.00854969	LTBP3/VEGFC/PTPRC	3
BP	GO:0014074	response to purine-containing compound	6/233	134/18800	0.00654569	0.0174762	0.00854969	PTK2B/FOS/PIK3CG/COL1A1/PRKAA1/MMP19	6
BP	GO:0043467	regulation of generation of precursor metabolites and energy	6/233	134/18800	0.00654569	0.0174762	0.00854969	SPHK2/TP53/MYC/PRKAA1/TNF/PPP1CB	6
BP	GO:1903052	positive regulation of proteolysis involved in cellular protein catabolic process	6/233	134/18800	0.00654569	0.0174762	0.00854969	PTK2/PTK2B/SOCS5/AXIN1/CSNK1D/DVL1	6
BP	GO:0090101	negative regulation of transmembrane receptor protein serine/threonine kinase signaling pathway	6/233	135/18800	0.00678107	0.018093	0.00885145	TGFB3/TP53/SFRP1/GREM1/FZD1/LRP1	6
BP	GO:0001708	cell fate specification	5/233	96/18800	0.00687013	0.0183071	0.0089562	ITGB1/FZD7/BMPR1A/CTNNB1/SOX9	5
BP	GO:0010769	regulation of cell morphogenesis involved in differentiation	5/233	96/18800	0.00687013	0.0183071	0.0089562	CDC42/PTK2/RAC3/PDPN/FBLN1	5
BP	GO:0030865	cortical cytoskeleton organization	4/233	61/18800	0.00690869	0.0183746	0.00898919	RAC3/RAC2/TNF/DLG1	4
BP	GO:0045428	regulation of nitric oxide biosynthetic process	4/233	61/18800	0.00690869	0.0183746	0.00898919	PTK2B/TNF/SMAD3/PTX3	4
BP	GO:1904589	regulation of protein import	4/233	61/18800	0.00690869	0.0183746	0.00898919	TGFB1/HCLS1/SMAD3/BMP4	4
BP	GO:0000082	G1/S transition of mitotic cell cycle	8/233	225/18800	0.00714761	0.0189348	0.00926324	TP53/ITGB1/CDKN1A/MYC/CRLF3/ID2/CCND1/DLG1	8
BP	GO:0002790	peptide secretion	8/233	225/18800	0.00714761	0.0189348	0.00926324	RAF1/SFRP1/SYT7/BAD/CCL5/TNF/SMAD2/TCF7L2	8
BP	GO:0010165	response to X-ray	3/233	32/18800	0.00715121	0.0189348	0.00926324	TP53/SFRP1/CCND1	3
BP	GO:0032480	negative regulation of type I interferon production	3/233	32/18800	0.00715121	0.0189348	0.00926324	PPM1B/RELB/NMI	3
BP	GO:0043304	regulation of mast cell degranulation	3/233	32/18800	0.00715121	0.0189348	0.00926324	SPHK2/RAC2/FOXF1	3
BP	GO:0051385	response to mineralocorticoid	3/233	32/18800	0.00715121	0.0189348	0.00926324	FOS/IGF1R/CCND1	3
BP	GO:1901889	negative regulation of cell junction assembly	3/233	32/18800	0.00715121	0.0189348	0.00926324	MMP14/THBS1/TNF	3
BP	GO:0032642	regulation of chemokine production	5/233	97/18800	0.00717213	0.018966	0.00927853	EPHA2/IL7/SOCS5/TNF/SNAI2	5
BP	GO:1902807	negative regulation of cell cycle G1/S phase transition	5/233	97/18800	0.00717213	0.018966	0.00927853	TP53/CDKN1A/CRLF3/CCND1/DLG1	5
BP	GO:0022898	regulation of transmembrane transporter activity	9/233	273/18800	0.0071796	0.0189737	0.00928229	SPHK2/PTK2B/CAPN1/ITGB1/DLG4/ACTB/DLG1/MMP9/CTSS	9
BP	GO:2001257	regulation of cation channel activity	7/233	180/18800	0.00727124	0.0192036	0.00939479	PTK2B/CAPN1/ITGB1/DLG4/DLG1/MMP9/CTSS	7
BP	GO:0002712	regulation of B cell mediated immunity	4/233	62/18800	0.00731479	0.0192941	0.00943906	TGFB1/STAT6/PTPRC/TNF	4
BP	GO:0002889	regulation of immunoglobulin mediated immune response	4/233	62/18800	0.00731479	0.0192941	0.00943906	TGFB1/STAT6/PTPRC/TNF	4
BP	GO:0050804	modulation of chemical synaptic transmission	12/233	429/18800	0.00746699	0.0196831	0.00962936	MAPK1/PTN/PTK2B/SYT7/ITGB1/KIT/TNF/FYN/DLG4/DVL1/FLOT1/PRKCB	12
BP	GO:0000079	regulation of cyclin-dependent protein serine/threonine kinase activity	5/233	98/18800	0.00748328	0.0196886	0.00963204	TNFAIP3/CDKN1A/GADD45A/ACTB/CCND1	5
BP	GO:0032602	chemokine production	5/233	98/18800	0.00748328	0.0196886	0.00963204	EPHA2/IL7/SOCS5/TNF/SNAI2	5
BP	GO:0036473	cell death in response to oxidative stress	5/233	98/18800	0.00748328	0.0196886	0.00963204	NOL3/TNF/FYN/FZD1/CTNNB1	5
BP	GO:0009855	determination of bilateral symmetry	6/233	138/18800	0.00752406	0.0197584	0.00966617	GREM1/SMAD3/TGFBR2/SMAD2/CTNNB1/FOXF1	6
BP	GO:0031644	regulation of neurological system process	6/233	138/18800	0.00752406	0.0197584	0.00966617	PTK2B/ITGA2/TNF/DLG4/DVL1/TNFRSF1B	6
BP	GO:0042552	myelination	6/233	138/18800	0.00752406	0.0197584	0.00966617	PTN/ITGB4/TNF/DLG1/CTNNB1/TNFRSF1B	6
BP	GO:0099177	regulation of trans-synaptic signaling	12/233	430/18800	0.00759948	0.0199438	0.0097569	MAPK1/PTN/PTK2B/SYT7/ITGB1/KIT/TNF/FYN/DLG4/DVL1/FLOT1/PRKCB	12
BP	GO:0006839	mitochondrial transport	7/233	182/18800	0.00770604	0.0199902	0.00977957	RAC2/TP53/NOL3/BAX/BAD/PRKAA1/BBC3	7
BP	GO:0032640	tumor necrosis factor production	7/233	182/18800	0.00770604	0.0199902	0.00977957	SPHK2/TNFAIP3/AXL/THBS1/PTPRC/BCL3/GAS6	7
BP	GO:0032680	regulation of tumor necrosis factor production	7/233	182/18800	0.00770604	0.0199902	0.00977957	SPHK2/TNFAIP3/AXL/THBS1/PTPRC/BCL3/GAS6	7
BP	GO:0010573	vascular endothelial growth factor production	4/233	63/18800	0.00773631	0.0199902	0.00977957	TGFB1/TNF/SULF1/SULF2	4
BP	GO:0032623	interleukin-2 production	4/233	63/18800	0.00773631	0.0199902	0.00977957	TNFAIP3/RUNX1/TRAF2/PTPRC	4
BP	GO:0032663	regulation of interleukin-2 production	4/233	63/18800	0.00773631	0.0199902	0.00977957	TNFAIP3/RUNX1/TRAF2/PTPRC	4
BP	GO:0070059	intrinsic apoptotic signaling pathway in response to endoplasmic reticulum stress	4/233	63/18800	0.00773631	0.0199902	0.00977957	TP53/BAX/TRAF2/BBC3	4
BP	GO:2000401	regulation of lymphocyte migration	4/233	63/18800	0.00773631	0.0199902	0.00977957	PTK2B/ADAM8/ITGA4/CCL5	4
BP	GO:0009582	detection of abiotic stimulus	6/233	139/18800	0.00778428	0.0199902	0.00977957	PTK2/ITGA2/KIT/TNF/FYN/CTNNB1	6
BP	GO:0051384	response to glucocorticoid	6/233	139/18800	0.00778428	0.0199902	0.00977957	FOS/BAD/IGF1R/TNF/WNT7B/CCND1	6
BP	GO:0051783	regulation of nuclear division	6/233	139/18800	0.00778428	0.0199902	0.00977957	CDC42/PDGFRB/DUSP1/TNF/WNT4/BMP4	6
BP	GO:0002431	Fc receptor mediated stimulatory signaling pathway	3/233	33/18800	0.00779538	0.0199902	0.00977957	PTK2/PTPRC/FYN	3
BP	GO:0009648	photoperiodism	3/233	33/18800	0.00779538	0.0199902	0.00977957	TP53/ID2/PPP1CB	3
BP	GO:0036314	response to sterol	3/233	33/18800	0.00779538	0.0199902	0.00977957	TGFB1/TGFBR2/SMAD2	3
BP	GO:0036475	neuron death in response to oxidative stress	3/233	33/18800	0.00779538	0.0199902	0.00977957	TNF/FZD1/CTNNB1	3
BP	GO:0048799	animal organ maturation	3/233	33/18800	0.00779538	0.0199902	0.00977957	GREM1/THBS3/ADAMTS7	3
BP	GO:0055094	response to lipoprotein particle	3/233	33/18800	0.00779538	0.0199902	0.00977957	SOCS5/ITGB1/ITGB2	3
BP	GO:1901099	negative regulation of signal transduction in absence of ligand	3/233	33/18800	0.00779538	0.0199902	0.00977957	IL7/TNF/SNAI2	3
BP	GO:2001240	negative regulation of extrinsic apoptotic signaling pathway in absence of ligand	3/233	33/18800	0.00779538	0.0199902	0.00977957	IL7/TNF/SNAI2	3
BP	GO:0001765	membrane raft assembly	2/233	11/18800	0.0078143	0.0199902	0.00977957	FLOT1/ANXA2	2
BP	GO:0003139	secondary heart field specification	2/233	11/18800	0.0078143	0.0199902	0.00977957	AXIN2/BMP4	2
BP	GO:0003174	mitral valve development	2/233	11/18800	0.0078143	0.0199902	0.00977957	EFNA1/BMPR1A	2
BP	GO:0010918	positive regulation of mitochondrial membrane potential	2/233	11/18800	0.0078143	0.0199902	0.00977957	BAD/MYC	2
BP	GO:0031293	membrane protein intracellular domain proteolysis	2/233	11/18800	0.0078143	0.0199902	0.00977957	TGFB1/MMP7	2
BP	GO:0034350	regulation of glial cell apoptotic process	2/233	11/18800	0.0078143	0.0199902	0.00977957	TRAF2/GAS6	2
BP	GO:0035404	histone-serine phosphorylation	2/233	11/18800	0.0078143	0.0199902	0.00977957	PRKAA1/MST1	2
BP	GO:0036363	transforming growth factor beta activation	2/233	11/18800	0.0078143	0.0199902	0.00977957	LTBP3/FURIN	2
BP	GO:0042487	regulation of odontogenesis of dentin-containing tooth	2/233	11/18800	0.0078143	0.0199902	0.00977957	CSF1/BMP4	2
BP	GO:0043471	regulation of cellular carbohydrate catabolic process	2/233	11/18800	0.0078143	0.0199902	0.00977957	TP53/PPP1CB	2
BP	GO:0048262	determination of dorsal/ventral asymmetry	2/233	11/18800	0.0078143	0.0199902	0.00977957	GREM1/CTNNB1	2
BP	GO:0060272	embryonic skeletal joint morphogenesis	2/233	11/18800	0.0078143	0.0199902	0.00977957	BMP4/CTNNB1	2
BP	GO:0060601	lateral sprouting from an epithelium	2/233	11/18800	0.0078143	0.0199902	0.00977957	BMP4/SULF1	2
BP	GO:0061299	retina vasculature morphogenesis in camera-type eye	2/233	11/18800	0.0078143	0.0199902	0.00977957	COL4A1/FZD4	2
BP	GO:0071803	positive regulation of podosome assembly	2/233	11/18800	0.0078143	0.0199902	0.00977957	TNF/FSCN1	2
BP	GO:0072110	glomerular mesangial cell proliferation	2/233	11/18800	0.0078143	0.0199902	0.00977957	PDGFRB/BMP4	2
BP	GO:0086100	endothelin receptor signaling pathway	2/233	11/18800	0.0078143	0.0199902	0.00977957	CDC42/PTK2B	2
BP	GO:0097048	dendritic cell apoptotic process	2/233	11/18800	0.0078143	0.0199902	0.00977957	AXL/GAS6	2
BP	GO:1902065	response to L-glutamate	2/233	11/18800	0.0078143	0.0199902	0.00977957	IGF1R/FYN	2
BP	GO:2000049	positive regulation of cell-cell adhesion mediated by cadherin	2/233	11/18800	0.0078143	0.0199902	0.00977957	SERPINF2/FLOT1	2
BP	GO:2000644	regulation of receptor catabolic process	2/233	11/18800	0.0078143	0.0199902	0.00977957	ANXA2/FURIN	2
BP	GO:2000668	regulation of dendritic cell apoptotic process	2/233	11/18800	0.0078143	0.0199902	0.00977957	AXL/GAS6	2
BP	GO:0071219	cellular response to molecule of bacterial origin	8/233	229/18800	0.00791136	0.020226	0.00989496	MAPK1/TGFB1/TNFAIP3/AXL/CCL5/TNF/SERPINE1/TNFRSF1B	8
BP	GO:0008217	regulation of blood pressure	7/233	183/18800	0.00793052	0.0202501	0.00990674	VEGFC/GNB3/TNF/SMAD3/ID2/SERPINF2/GAS6	7
BP	GO:0055001	muscle cell development	7/233	183/18800	0.00793052	0.0202501	0.00990674	PDGFRA/ITGB1/PDGFRB/BMPR1A/BMP4/LOX/EFEMP2	7
BP	GO:0002768	immune response-regulating cell surface receptor signaling pathway	10/233	328/18800	0.0080056	0.0204293	0.00999438	MAPK1/PTK2/INPP5D/BAX/CD19/KIT/PIK3CD/PTPRC/FYN/PRKCB	10
BP	GO:0007272	ensheathment of neurons	6/233	140/18800	0.00805094	0.0205072	0.0100325	PTN/ITGB4/TNF/DLG1/CTNNB1/TNFRSF1B	6
BP	GO:0008366	axon ensheathment	6/233	140/18800	0.00805094	0.0205072	0.0100325	PTN/ITGB4/TNF/DLG1/CTNNB1/TNFRSF1B	6
BP	GO:0034341	response to interferon-gamma	6/233	140/18800	0.00805094	0.0205072	0.0100325	CDC42/TP53/MYC/CCL5/TNF/NMI	6
BP	GO:0030888	regulation of B cell proliferation	4/233	64/18800	0.00817351	0.0207939	0.0101728	INPP5D/IL7/CDKN1A/PTPRC	4
BP	GO:0080164	regulation of nitric oxide metabolic process	4/233	64/18800	0.00817351	0.0207939	0.0101728	PTK2B/TNF/SMAD3/PTX3	4
BP	GO:0045727	positive regulation of translation	6/233	141/18800	0.0083241	0.0211641	0.0103539	PTK2B/THBS1/ITGA2/CCL5/TNF/BCL3	6
BP	GO:0002335	mature B cell differentiation	3/233	34/18800	0.00847271	0.0214117	0.010475	PTK2B/CD19/BCL3	3
BP	GO:0009649	entrainment of circadian clock	3/233	34/18800	0.00847271	0.0214117	0.010475	TP53/ID2/PPP1CB	3
BP	GO:0032743	positive regulation of interleukin-2 production	3/233	34/18800	0.00847271	0.0214117	0.010475	RUNX1/TRAF2/PTPRC	3
BP	GO:0033006	regulation of mast cell activation involved in immune response	3/233	34/18800	0.00847271	0.0214117	0.010475	SPHK2/RAC2/FOXF1	3
BP	GO:0035025	positive regulation of Rho protein signal transduction	3/233	34/18800	0.00847271	0.0214117	0.010475	LPAR1/PDGFRB/ARRB1	3
BP	GO:0048730	epidermis morphogenesis	3/233	34/18800	0.00847271	0.0214117	0.010475	FGF7/TGFB2/CTNNB1	3
BP	GO:0090322	regulation of superoxide metabolic process	3/233	34/18800	0.00847271	0.0214117	0.010475	TGFB1/ITGB2/FBLN5	3
BP	GO:2000352	negative regulation of endothelial cell apoptotic process	3/233	34/18800	0.00847271	0.0214117	0.010475	TNFAIP3/SERPINE1/GAS6	3
BP	GO:0048477	oogenesis	5/233	101/18800	0.00847298	0.0214117	0.010475	PTN/PTK2B/WNT4/CTNNB1/PTX3	5
BP	GO:1904029	regulation of cyclin-dependent protein kinase activity	5/233	101/18800	0.00847298	0.0214117	0.010475	TNFAIP3/CDKN1A/GADD45A/ACTB/CCND1	5
BP	GO:0002260	lymphocyte homeostasis	4/233	65/18800	0.0086266	0.0217734	0.010652	TNFAIP3/BAX/JAK3/IL2RA	4
BP	GO:0043954	cellular component maintenance	4/233	65/18800	0.0086266	0.0217734	0.010652	IGF1R/FYN/DLG4/DLG1	4
BP	GO:0032677	regulation of interleukin-8 production	5/233	102/18800	0.00882208	0.0222263	0.0108735	ARRB1/PTPRC/TNF/BCL3/SERPINE1	5
BP	GO:0043255	regulation of carbohydrate biosynthetic process	5/233	102/18800	0.00882208	0.0222263	0.0108735	TGFB1/PTK2B/PTH1R/MST1/PPP1CB	5
BP	GO:0062014	negative regulation of small molecule metabolic process	5/233	102/18800	0.00882208	0.0222263	0.0108735	TP53/MST1/WNT4/SNAI2/SOX9	5
BP	GO:0046847	filopodium assembly	4/233	66/18800	0.0090958	0.0228743	0.0111906	CDC42/TGFB3/ITGB4/FSCN1	4
BP	GO:1900076	regulation of cellular response to insulin stimulus	4/233	66/18800	0.0090958	0.0228743	0.0111906	TSC2/PRKAA1/SOCS3/PRKCB	4
BP	GO:2000514	regulation of CD4-positive, alpha-beta T cell activation	4/233	66/18800	0.0090958	0.0228743	0.0111906	RUNX1/SOCS5/JAK3/TGFBR2	4
BP	GO:0010522	regulation of calcium ion transport into cytosol	5/233	103/18800	0.009181	0.022919	0.0112124	PTK2B/UBASH3B/BAX/CD19/FYN	5
BP	GO:0031058	positive regulation of histone modification	5/233	103/18800	0.009181	0.022919	0.0112124	SPHK2/TP53/ARRB1/SNAI2/CTNNB1	5
BP	GO:0032637	interleukin-8 production	5/233	103/18800	0.009181	0.022919	0.0112124	ARRB1/PTPRC/TNF/BCL3/SERPINE1	5
BP	GO:0042102	positive regulation of T cell proliferation	5/233	103/18800	0.009181	0.022919	0.0112124	JAK3/IL2RA/PTPRC/CCL5/TGFBR2	5
BP	GO:0042472	inner ear morphogenesis	5/233	103/18800	0.009181	0.022919	0.0112124	FZD2/FZD3/DVL1/FZD6/SOX9	5
BP	GO:1903038	negative regulation of leukocyte cell-cell adhesion	6/233	144/18800	0.00918352	0.022919	0.0112124	RUNX1/SOCS5/JAK3/IL2RA/BMP4/DLG1	6
BP	GO:0033280	response to vitamin D	3/233	35/18800	0.00918356	0.022919	0.0112124	SFRP1/SPP1/SNAI2	3
BP	GO:0035137	hindlimb morphogenesis	3/233	35/18800	0.00918356	0.022919	0.0112124	BMPR1A/BMP4/CTNNB1	3
BP	GO:0044319	wound healing, spreading of cells	3/233	35/18800	0.00918356	0.022919	0.0112124	ITGA5/PDPN/HBEGF	3
BP	GO:0090505	epiboly involved in wound healing	3/233	35/18800	0.00918356	0.022919	0.0112124	ITGA5/PDPN/HBEGF	3
BP	GO:0001921	positive regulation of receptor recycling	2/233	12/18800	0.00930102	0.022919	0.0112124	INPP5F/ANXA2	2
BP	GO:0014745	negative regulation of muscle adaptation	2/233	12/18800	0.00930102	0.022919	0.0112124	NOL3/SMAD3	2
BP	GO:0021781	glial cell fate commitment	2/233	12/18800	0.00930102	0.022919	0.0112124	CTNNB1/SOX9	2
BP	GO:0030656	regulation of vitamin metabolic process	2/233	12/18800	0.00930102	0.022919	0.0112124	TNF/SNAI2	2
BP	GO:0032782	bile acid secretion	2/233	12/18800	0.00930102	0.022919	0.0112124	PRKAA1/TNF	2
BP	GO:0032823	regulation of natural killer cell differentiation	2/233	12/18800	0.00930102	0.022919	0.0112124	AXL/GAS6	2
BP	GO:0032908	regulation of transforming growth factor beta1 production	2/233	12/18800	0.00930102	0.022919	0.0112124	THBS1/FURIN	2
BP	GO:0033629	negative regulation of cell adhesion mediated by integrin	2/233	12/18800	0.00930102	0.022919	0.0112124	SNAI2/SERPINE1	2
BP	GO:0033690	positive regulation of osteoblast proliferation	2/233	12/18800	0.00930102	0.022919	0.0112124	TMEM119/IGF1R	2
BP	GO:0034333	adherens junction assembly	2/233	12/18800	0.00930102	0.022919	0.0112124	ACTB/CTNNB1	2
BP	GO:0044848	biological phase	2/233	12/18800	0.00930102	0.022919	0.0112124	TGFB2/CTNNB1	2
BP	GO:0048548	regulation of pinocytosis	2/233	12/18800	0.00930102	0.022919	0.0112124	CDC42/AXL	2
NA	GO:0048680	positive regulation of axon regeneration	2/233	12/18800	0.00930102	0.022919	0.0112124	PTN/IGF1R	2
BP	GO:0051798	positive regulation of hair follicle development	2/233	12/18800	0.00930102	0.022919	0.0112124	TGFB2/TNF	2
BP	GO:0060394	negative regulation of pathway-restricted SMAD protein phosphorylation	2/233	12/18800	0.00930102	0.022919	0.0112124	GREM1/LRP1	2
BP	GO:0060442	branching involved in prostate gland morphogenesis	2/233	12/18800	0.00930102	0.022919	0.0112124	SFRP1/BMP4	2
BP	GO:0060736	prostate gland growth	2/233	12/18800	0.00930102	0.022919	0.0112124	PRLR/SOX9	2
BP	GO:0061309	cardiac neural crest cell development involved in outflow tract morphogenesis	2/233	12/18800	0.00930102	0.022919	0.0112124	CDC42/BMP4	2
BP	GO:0070601	centromeric sister chromatid cohesion	2/233	12/18800	0.00930102	0.022919	0.0112124	AXIN2/CTNNB1	2
BP	GO:0071635	negative regulation of transforming growth factor beta production	2/233	12/18800	0.00930102	0.022919	0.0112124	FN1/FURIN	2
BP	GO:0072182	regulation of nephron tubule epithelial cell differentiation	2/233	12/18800	0.00930102	0.022919	0.0112124	WWTR1/CTNNB1	2
BP	GO:0090331	negative regulation of platelet aggregation	2/233	12/18800	0.00930102	0.022919	0.0112124	UBASH3B/ADAMTS18	2
BP	GO:1901524	regulation of mitophagy	2/233	12/18800	0.00930102	0.022919	0.0112124	TP53/TSC2	2
BP	GO:2000303	regulation of ceramide biosynthetic process	2/233	12/18800	0.00930102	0.022919	0.0112124	SPHK2/PRKAA1	2
BP	GO:0007612	learning	6/233	145/18800	0.00948358	0.0233412	0.011419	PTN/FOS/ITGB1/KIT/FYN/DLG4	6
BP	GO:0043524	negative regulation of neuron apoptotic process	6/233	145/18800	0.00948358	0.0233412	0.011419	PTK2B/TGFB3/ADAM8/AXL/BAX/ERBB3	6
BP	GO:0002704	negative regulation of leukocyte mediated immunity	4/233	67/18800	0.00958134	0.0235539	0.011523	IL7R/JAK3/PTPRC/FOXF1	4
BP	GO:0046637	regulation of alpha-beta T cell differentiation	4/233	67/18800	0.00958134	0.0235539	0.011523	RUNX1/SOCS5/JAK3/TGFBR2	4
BP	GO:0060401	cytosolic calcium ion transport	7/233	190/18800	0.00963931	0.0236824	0.0115859	PTK2B/UBASH3B/NOL3/BAX/CD19/PTPRC/FYN	7
BP	GO:0050821	protein stabilization	7/233	191/18800	0.00990377	0.0242789	0.0118777	TP53/EFNA1/SMAD3/DVL3/DVL1/CRTAP/FLOT1	7
BP	GO:0018149	peptide cross-linking	3/233	36/18800	0.00992824	0.0242789	0.0118777	TGM2/THBS1/FN1	3
BP	GO:0048854	brain morphogenesis	3/233	36/18800	0.00992824	0.0242789	0.0118777	FBXW11/FZD3/FZD6	3
BP	GO:0071402	cellular response to lipoprotein particle stimulus	3/233	36/18800	0.00992824	0.0242789	0.0118777	SOCS5/ITGB1/ITGB2	3
BP	GO:0090504	epiboly	3/233	36/18800	0.00992824	0.0242789	0.0118777	ITGA5/PDPN/HBEGF	3
BP	GO:1902745	positive regulation of lamellipodium organization	3/233	36/18800	0.00992824	0.0242789	0.0118777	CDC42/RAC2/FSCN1	3
BP	GO:1903749	positive regulation of establishment of protein localization to mitochondrion	3/233	36/18800	0.00992824	0.0242789	0.0118777	RAC2/PRKAA1/BBC3	3
BP	GO:0046634	regulation of alpha-beta T cell activation	5/233	105/18800	0.00992881	0.0242789	0.0118777	RUNX1/SOCS5/JAK3/PTPRC/TGFBR2	5
BP	GO:0002720	positive regulation of cytokine production involved in immune response	4/233	68/18800	0.0100834	0.0246135	0.0120414	SPHK2/KIT/IL1R1/TRAF2	4
BP	GO:0046626	regulation of insulin receptor signaling pathway	4/233	68/18800	0.0100834	0.0246135	0.0120414	TSC2/PRKAA1/SOCS3/PRKCB	4
BP	GO:2000756	regulation of peptidyl-lysine acetylation	4/233	68/18800	0.0100834	0.0246135	0.0120414	SPHK2/PRKAA1/ARRB1/SNAI2	4
BP	GO:0050796	regulation of insulin secretion	6/233	147/18800	0.0101046	0.0246507	0.0120596	SFRP1/SYT7/BAD/CCL5/TNF/TCF7L2	6
BP	GO:0031349	positive regulation of defense response	9/233	289/18800	0.0102077	0.0248876	0.0121755	ADAM8/PIK3CG/ITGA2/OSMR/CCL5/TNF/FYN/NMI/SERPINE1	9
BP	GO:0120034	positive regulation of plasma membrane bounded cell projection assembly	5/233	106/18800	0.010318	0.0251417	0.0122998	CDC42/RAC2/TGFB3/KIT/FSCN1	5
BP	GO:0003012	muscle system process	12/233	449/18800	0.0104867	0.0255378	0.0124936	NOL3/PIK3CG/ITGA2/VEGFB/KIT/TNF/INPP5F/SMAD3/DLG1/SULF1/SULF2/TNFRSF1B	12
BP	GO:0034394	protein localization to cell surface	4/233	69/18800	0.0106023	0.0257741	0.0126092	FGF7/TNF/CTNNB1/FBLN5	4
BP	GO:0046635	positive regulation of alpha-beta T cell activation	4/233	69/18800	0.0106023	0.0257741	0.0126092	RUNX1/SOCS5/PTPRC/TGFBR2	4
BP	GO:0070830	bicellular tight junction assembly	4/233	69/18800	0.0106023	0.0257741	0.0126092	EPHA2/TNF/SNAI2/DLG1	4
BP	GO:0010092	specification of animal organ identity	3/233	37/18800	0.0107071	0.0259681	0.0127041	AXIN2/BMP4/CTNNB1	3
BP	GO:0042092	type 2 immune response	3/233	37/18800	0.0107071	0.0259681	0.0127041	SOCS5/STAT6/BCL3	3
BP	GO:0045730	respiratory burst	3/233	37/18800	0.0107071	0.0259681	0.0127041	RAC2/PIK3CG/PIK3CD	3
BP	GO:0071276	cellular response to cadmium ion	3/233	37/18800	0.0107071	0.0259681	0.0127041	MAPK1/FOS/MMP9	3
BP	GO:0031334	positive regulation of protein complex assembly	7/233	194/18800	0.0107289	0.0260059	0.0127226	TGFB1/PTK2B/TP53/BAX/TNF/DLG1/FSCN1	7
BP	GO:0023061	signal release	12/233	451/18800	0.0108342	0.0262458	0.0128399	RAF1/SFRP1/SYT7/SPP1/BAD/CCL5/TNF/FZD4/SMAD2/DVL1/TCF7L2/PRKCB	12
BP	GO:0002664	regulation of T cell tolerance induction	2/233	13/18800	0.010903	0.0262594	0.0128466	IL2RA/TGFBR2	2
BP	GO:0010623	programmed cell death involved in cell development	2/233	13/18800	0.010903	0.0262594	0.0128466	BAX/KIT	2
BP	GO:0031272	regulation of pseudopodium assembly	2/233	13/18800	0.010903	0.0262594	0.0128466	CDC42/KIT	2
BP	GO:0031274	positive regulation of pseudopodium assembly	2/233	13/18800	0.010903	0.0262594	0.0128466	CDC42/KIT	2
BP	GO:0042362	fat-soluble vitamin biosynthetic process	2/233	13/18800	0.010903	0.0262594	0.0128466	TNF/SNAI2	2
BP	GO:0042659	regulation of cell fate specification	2/233	13/18800	0.010903	0.0262594	0.0128466	FZD7/BMPR1A	2
NA	GO:0070572	positive regulation of neuron projection regeneration	2/233	13/18800	0.010903	0.0262594	0.0128466	PTN/IGF1R	2
BP	GO:0090030	regulation of steroid hormone biosynthetic process	2/233	13/18800	0.010903	0.0262594	0.0128466	IGF1R/WNT4	2
BP	GO:0090153	regulation of sphingolipid biosynthetic process	2/233	13/18800	0.010903	0.0262594	0.0128466	SPHK2/PRKAA1	2
BP	GO:1905038	regulation of membrane lipid metabolic process	2/233	13/18800	0.010903	0.0262594	0.0128466	SPHK2/PRKAA1	2
BP	GO:1901617	organic hydroxy compound biosynthetic process	8/233	243/18800	0.0110737	0.0266551	0.0130402	SPHK2/PTK2B/PTH1R/PRKAA1/TGFB2/TNF/WNT4/SNAI2	8
BP	GO:0021761	limbic system development	5/233	108/18800	0.0111274	0.0267635	0.0130932	BAX/MYC/IGF1R/NF2/LEF1	5
BP	GO:0002548	monocyte chemotaxis	4/233	70/18800	0.0111381	0.0267635	0.0130932	GREM1/DUSP1/CCL5/SERPINE1	4
BP	GO:0045911	positive regulation of DNA recombination	4/233	70/18800	0.0111381	0.0267635	0.0130932	TGFB1/STAT6/PTPRC/ACTB	4
BP	GO:0050851	antigen receptor-mediated signaling pathway	8/233	244/18800	0.0113307	0.0272108	0.013312	MAPK1/INPP5D/BAX/CD19/PIK3CD/PTPRC/FYN/PRKCB	8
BP	GO:0002369	T cell cytokine production	3/233	38/18800	0.0115203	0.0275705	0.013488	IL1R1/TRAF2/TNFRSF1B	3
BP	GO:0002724	regulation of T cell cytokine production	3/233	38/18800	0.0115203	0.0275705	0.013488	IL1R1/TRAF2/TNFRSF1B	3
BP	GO:0032371	regulation of sterol transport	3/233	38/18800	0.0115203	0.0275705	0.013488	LRP1/ANXA2/FURIN	3
BP	GO:0032374	regulation of cholesterol transport	3/233	38/18800	0.0115203	0.0275705	0.013488	LRP1/ANXA2/FURIN	3
BP	GO:0045191	regulation of isotype switching	3/233	38/18800	0.0115203	0.0275705	0.013488	TGFB1/STAT6/PTPRC	3
BP	GO:1904037	positive regulation of epithelial cell apoptotic process	3/233	38/18800	0.0115203	0.0275705	0.013488	THBS1/ITGA4/BAD	3
BP	GO:0021537	telencephalon development	8/233	247/18800	0.0121283	0.0290089	0.0141917	BAX/BAD/IGF1R/NF2/LEF1/BMP4/ID2/CTNNB1	8
BP	GO:0006801	superoxide metabolic process	4/233	72/18800	0.0122613	0.0292932	0.0143308	TGFB1/ITGB2/SH3PXD2B/FBLN5	4
BP	GO:0030330	DNA damage response, signal transduction by p53 class mediator	4/233	72/18800	0.0122613	0.0292932	0.0143308	TP53/CDKN1A/BCL3/SNAI2	4
BP	GO:0002691	regulation of cellular extravasation	3/233	39/18800	0.0123682	0.0294302	0.0143978	ADAM8/ITGA4/IL1R1	3
BP	GO:0014912	negative regulation of smooth muscle cell migration	3/233	39/18800	0.0123682	0.0294302	0.0143978	SERPINE1/BMPR1A/LRP1	3
BP	GO:0042307	positive regulation of protein import into nucleus	3/233	39/18800	0.0123682	0.0294302	0.0143978	TGFB1/HCLS1/SMAD3	3
BP	GO:0043029	T cell homeostasis	3/233	39/18800	0.0123682	0.0294302	0.0143978	BAX/JAK3/IL2RA	3
BP	GO:0071470	cellular response to osmotic stress	3/233	39/18800	0.0123682	0.0294302	0.0143978	BAD/RELB/AKR1B1	3
BP	GO:0098815	modulation of excitatory postsynaptic potential	3/233	39/18800	0.0123682	0.0294302	0.0143978	PTK2B/DLG4/DVL1	3
BP	GO:1904994	regulation of leukocyte adhesion to vascular endothelial cell	3/233	39/18800	0.0123682	0.0294302	0.0143978	ITGA4/TNF/ITGB2	3
BP	GO:0015850	organic hydroxy compound transport	8/233	248/18800	0.0124032	0.0294965	0.0144303	SYT7/SPP1/MYC/PRKAA1/ACTB/LRP1/ANXA2/FURIN	8
BP	GO:0007088	regulation of mitotic nuclear division	5/233	111/18800	0.0124211	0.0295053	0.0144346	CDC42/PDGFRB/DUSP1/TNF/BMP4	5
BP	GO:0048640	negative regulation of developmental growth	5/233	111/18800	0.0124211	0.0295053	0.0144346	SOCS2/SPP1/CDKN1A/TGFBR2/BMP4	5
BP	GO:0051092	positive regulation of NF-kappaB transcription factor activity	6/233	154/18800	0.0125061	0.0295488	0.0144559	ADAM8/GREM1/TRAF2/TNF/FLOT1/PRKCB	6
BP	GO:0002829	negative regulation of type 2 immune response	2/233	14/18800	0.0126171	0.0295488	0.0144559	SOCS5/STAT6	2
BP	GO:0003188	heart valve formation	2/233	14/18800	0.0126171	0.0295488	0.0144559	EFNA1/SOX9	2
BP	GO:0003222	ventricular trabecula myocardium morphogenesis	2/233	14/18800	0.0126171	0.0295488	0.0144559	TGFB2/BMPR1A	2
BP	GO:0010225	response to UV-C	2/233	14/18800	0.0126171	0.0295488	0.0144559	TP53/BCL3	2
BP	GO:0010752	regulation of cGMP-mediated signaling	2/233	14/18800	0.0126171	0.0295488	0.0144559	PTK2B/THBS1	2
BP	GO:0010958	regulation of amino acid import across plasma membrane	2/233	14/18800	0.0126171	0.0295488	0.0144559	ITGB1/TNF	2
BP	GO:0032352	positive regulation of hormone metabolic process	2/233	14/18800	0.0126171	0.0295488	0.0144559	IGF1R/WNT4	2
BP	GO:0034111	negative regulation of homotypic cell-cell adhesion	2/233	14/18800	0.0126171	0.0295488	0.0144559	UBASH3B/ADAMTS18	2
BP	GO:0042117	monocyte activation	2/233	14/18800	0.0126171	0.0295488	0.0144559	FN1/CSF1	2
BP	GO:0044849	estrous cycle	2/233	14/18800	0.0126171	0.0295488	0.0144559	PTN/IGF1R	2
BP	GO:0048681	negative regulation of axon regeneration	2/233	14/18800	0.0126171	0.0295488	0.0144559	SPP1/INPP5F	2
BP	GO:0050930	induction of positive chemotaxis	2/233	14/18800	0.0126171	0.0295488	0.0144559	VEGFC/VEGFB	2
BP	GO:0051645	Golgi localization	2/233	14/18800	0.0126171	0.0295488	0.0144559	CDC42/YWHAZ	2
BP	GO:0070307	lens fiber cell development	2/233	14/18800	0.0126171	0.0295488	0.0144559	EPHA2/WNT7B	2
BP	GO:0071801	regulation of podosome assembly	2/233	14/18800	0.0126171	0.0295488	0.0144559	TNF/FSCN1	2
BP	GO:0072160	nephron tubule epithelial cell differentiation	2/233	14/18800	0.0126171	0.0295488	0.0144559	WWTR1/CTNNB1	2
BP	GO:0098760	response to interleukin-7	2/233	14/18800	0.0126171	0.0295488	0.0144559	IL7R/IL2RG	2
BP	GO:0098761	cellular response to interleukin-7	2/233	14/18800	0.0126171	0.0295488	0.0144559	IL7R/IL2RG	2
BP	GO:1901722	regulation of cell proliferation involved in kidney development	2/233	14/18800	0.0126171	0.0295488	0.0144559	MYC/BMP4	2
BP	GO:1902043	positive regulation of extrinsic apoptotic signaling pathway via death domain receptors	2/233	14/18800	0.0126171	0.0295488	0.0144559	SFRP1/THBS1	2
BP	GO:1903789	regulation of amino acid transmembrane transport	2/233	14/18800	0.0126171	0.0295488	0.0144559	ITGB1/TNF	2
BP	GO:1905049	negative regulation of metallopeptidase activity	2/233	14/18800	0.0126171	0.0295488	0.0144559	TIMP1/LRP1	2
BP	GO:1905065	positive regulation of vascular smooth muscle cell differentiation	2/233	14/18800	0.0126171	0.0295488	0.0144559	KIT/EFEMP2	2
BP	GO:1905939	regulation of gonad development	2/233	14/18800	0.0126171	0.0295488	0.0144559	WNT4/SOX9	2
BP	GO:0015833	peptide transport	8/233	249/18800	0.0126825	0.0296854	0.0145227	RAF1/SFRP1/SYT7/BAD/CCL5/TNF/SMAD2/TCF7L2	8
BP	GO:0002429	immune response-activating cell surface receptor signaling pathway	9/233	300/18800	0.0127894	0.0299018	0.0146286	MAPK1/PTK2/INPP5D/BAX/CD19/PIK3CD/PTPRC/FYN/PRKCB	9
BP	GO:0002757	immune response-activating signal transduction	9/233	300/18800	0.0127894	0.0299018	0.0146286	MAPK1/PTK2/INPP5D/BAX/CD19/PIK3CD/PTPRC/FYN/PRKCB	9
BP	GO:0048662	negative regulation of smooth muscle cell proliferation	4/233	73/18800	0.0128491	0.0300245	0.0146886	TNFAIP3/TGFB3/CDKN1A/EFEMP2	4
BP	GO:0002456	T cell mediated immunity	5/233	112/18800	0.012874	0.0300274	0.01469	IL7R/IL1R1/TRAF2/PTPRC/TNFRSF1B	5
BP	GO:0006939	smooth muscle contraction	5/233	112/18800	0.012874	0.0300274	0.01469	ITGA2/KIT/DLG1/SULF1/SULF2	5
BP	GO:0007189	adenylate cyclase-activating G protein-coupled receptor signaling pathway	6/233	155/18800	0.0128792	0.0300274	0.01469	S1PR1/PTH1R/LPAR3/LPAR1/GNB1/GNG2	6
BP	GO:1905952	regulation of lipid localization	6/233	155/18800	0.0128792	0.0300274	0.01469	SPP1/THBS1/TNF/LRP1/ANXA2/FURIN	6
BP	GO:0010719	negative regulation of epithelial to mesenchymal transition	3/233	40/18800	0.013251	0.0308288	0.0150821	SFRP1/EFNA1/TGFB2	3
BP	GO:0030513	positive regulation of BMP signaling pathway	3/233	40/18800	0.013251	0.0308288	0.0150821	BMP4/SMAD2/SULF1	3
BP	GO:0048713	regulation of oligodendrocyte differentiation	3/233	40/18800	0.013251	0.0308288	0.0150821	PTN/CTNNB1/TNFRSF1B	3
BP	GO:0007605	sensory perception of sound	6/233	156/18800	0.01326	0.0308288	0.0150821	COL1A1/KIT/AXIN1/SNAI2/FZD4/BIRC5	6
BP	GO:1903169	regulation of calcium ion transmembrane transport	6/233	156/18800	0.01326	0.0308288	0.0150821	PTK2B/UBASH3B/BAX/PIK3CG/CD19/FYN	6
BP	GO:0051051	negative regulation of transport	12/233	464/18800	0.0133152	0.0309398	0.0151364	PTK2B/SFRP1/THBS1/ERBB3/MYC/TNF/DLG4/MMP9/FOXF1/ANXA2/TNFRSF1B/PRKCB	12
BP	GO:0009880	embryonic pattern specification	4/233	74/18800	0.0134546	0.0312461	0.0152862	SMAD3/SMAD1/SMAD2/CTNNB1	4
BP	GO:0017157	regulation of exocytosis	7/233	204/18800	0.0138414	0.0321265	0.0157169	SPHK2/RAC2/SYT7/ITGB2/DVL1/FOXF1/PRKCB	7
BP	GO:0002437	inflammatory response to antigenic stimulus	4/233	75/18800	0.0140779	0.0326391	0.0159677	IL2RA/TNF/FYN/FURIN	4
BP	GO:0006809	nitric oxide biosynthetic process	4/233	75/18800	0.0140779	0.0326391	0.0159677	PTK2B/TNF/SMAD3/PTX3	4
BP	GO:0032409	regulation of transporter activity	9/233	305/18800	0.0141116	0.032699	0.015997	SPHK2/PTK2B/CAPN1/ITGB1/DLG4/ACTB/DLG1/MMP9/CTSS	9
BP	GO:0021983	pituitary gland development	3/233	41/18800	0.0141688	0.0327949	0.0160439	WNT4/BMPR1A/BMP4	3
BP	GO:0042119	neutrophil activation	3/233	41/18800	0.0141688	0.0327949	0.0160439	CCL5/TNF/ITGB2	3
BP	GO:0018107	peptidyl-threonine phosphorylation	5/233	115/18800	0.0142995	0.0330371	0.0161624	MAPK1/TGFB1/AXIN1/TGFBR2/PRKCB	5
BP	GO:0002517	T cell tolerance induction	2/233	15/18800	0.0144403	0.0330371	0.0161624	IL2RA/TGFBR2	2
BP	GO:0002679	respiratory burst involved in defense response	2/233	15/18800	0.0144403	0.0330371	0.0161624	PIK3CG/PIK3CD	2
BP	GO:0002730	regulation of dendritic cell cytokine production	2/233	15/18800	0.0144403	0.0330371	0.0161624	KIT/JAK3	2
BP	GO:0003214	cardiac left ventricle morphogenesis	2/233	15/18800	0.0144403	0.0330371	0.0161624	TGFBR2/FOXF1	2
BP	GO:0014029	neural crest formation	2/233	15/18800	0.0144403	0.0330371	0.0161624	SFRP1/SOX9	2
BP	GO:0031269	pseudopodium assembly	2/233	15/18800	0.0144403	0.0330371	0.0161624	CDC42/KIT	2
BP	GO:0032905	transforming growth factor beta1 production	2/233	15/18800	0.0144403	0.0330371	0.0161624	THBS1/FURIN	2
BP	GO:0033599	regulation of mammary gland epithelial cell proliferation	2/233	15/18800	0.0144403	0.0330371	0.0161624	BAX/CCND1	2
BP	GO:0034112	positive regulation of homotypic cell-cell adhesion	2/233	15/18800	0.0144403	0.0330371	0.0161624	CCL5/PDPN	2
BP	GO:0034116	positive regulation of heterotypic cell-cell adhesion	2/233	15/18800	0.0144403	0.0330371	0.0161624	TNF/FLOT1	2
BP	GO:0045064	T-helper 2 cell differentiation	2/233	15/18800	0.0144403	0.0330371	0.0161624	SOCS5/BCL3	2
BP	GO:0048308	organelle inheritance	2/233	15/18800	0.0144403	0.0330371	0.0161624	MAPK1/YWHAZ	2
BP	GO:0048313	Golgi inheritance	2/233	15/18800	0.0144403	0.0330371	0.0161624	MAPK1/YWHAZ	2
BP	GO:0048820	hair follicle maturation	2/233	15/18800	0.0144403	0.0330371	0.0161624	TGFB2/CTNNB1	2
BP	GO:0060026	convergent extension	2/233	15/18800	0.0144403	0.0330371	0.0161624	SFRP1/DVL1	2
BP	GO:0070571	negative regulation of neuron projection regeneration	2/233	15/18800	0.0144403	0.0330371	0.0161624	SPP1/INPP5F	2
BP	GO:0072378	blood coagulation, fibrin clot formation	2/233	15/18800	0.0144403	0.0330371	0.0161624	FN1/FBLN1	2
BP	GO:0072498	embryonic skeletal joint development	2/233	15/18800	0.0144403	0.0330371	0.0161624	BMP4/CTNNB1	2
BP	GO:1902563	regulation of neutrophil activation	2/233	15/18800	0.0144403	0.0330371	0.0161624	TNF/ITGB2	2
BP	GO:2000052	positive regulation of non-canonical Wnt signaling pathway	2/233	15/18800	0.0144403	0.0330371	0.0161624	SFRP1/CSNK1D	2
BP	GO:0044843	cell cycle G1/S phase transition	8/233	255/18800	0.0144568	0.0330566	0.0161719	TP53/ITGB1/CDKN1A/MYC/CRLF3/ID2/CCND1/DLG1	8
BP	GO:2000045	regulation of G1/S transition of mitotic cell cycle	6/233	160/18800	0.0148624	0.0339653	0.0166165	TP53/CDKN1A/CRLF3/ID2/CCND1/DLG1	6
BP	GO:0034976	response to endoplasmic reticulum stress	8/233	257/18800	0.0150865	0.0344259	0.0168418	TP53/BAX/THBS4/THBS1/TRAF2/CCND1/BBC3/FLOT1	8
BP	GO:0030890	positive regulation of B cell proliferation	3/233	42/18800	0.0151219	0.0344259	0.0168418	IL7/CDKN1A/PTPRC	3
BP	GO:0034142	toll-like receptor 4 signaling pathway	3/233	42/18800	0.0151219	0.0344259	0.0168418	TNFAIP3/PIK3AP1/NMI	3
BP	GO:0046636	negative regulation of alpha-beta T cell activation	3/233	42/18800	0.0151219	0.0344259	0.0168418	RUNX1/SOCS5/JAK3	3
BP	GO:1900371	regulation of purine nucleotide biosynthetic process	3/233	42/18800	0.0151219	0.0344259	0.0168418	SPHK2/PDK4/MYC	3
BP	GO:1904591	positive regulation of protein import	3/233	42/18800	0.0151219	0.0344259	0.0168418	TGFB1/HCLS1/SMAD3	3
BP	GO:1904706	negative regulation of vascular smooth muscle cell proliferation	3/233	42/18800	0.0151219	0.0344259	0.0168418	TGFB3/CDKN1A/EFEMP2	3
BP	GO:0050806	positive regulation of synaptic transmission	6/233	161/18800	0.015283	0.0347737	0.017012	MAPK1/PTN/PTK2B/TNF/DLG4/FLOT1	6
BP	GO:0032609	interferon-gamma production	5/233	117/18800	0.0153066	0.0347892	0.0170195	AXL/IL1R1/TNF/BCL3/GAS6	5
BP	GO:0032649	regulation of interferon-gamma production	5/233	117/18800	0.0153066	0.0347892	0.0170195	AXL/IL1R1/TNF/BCL3/GAS6	5
BP	GO:0032720	negative regulation of tumor necrosis factor production	4/233	77/18800	0.0153789	0.0349153	0.0170812	TNFAIP3/AXL/BCL3/GAS6	4
BP	GO:0043297	apical junction assembly	4/233	77/18800	0.0153789	0.0349153	0.0170812	EPHA2/TNF/SNAI2/DLG1	4
BP	GO:0008654	phospholipid biosynthetic process	8/233	258/18800	0.0154087	0.0349641	0.0171051	SPHK2/INPP5D/SOCS2/SOCS5/PIK3CG/PIK3CD/INPP5F/SOCS3	8
BP	GO:0032368	regulation of lipid transport	5/233	118/18800	0.0158274	0.0358945	0.0175603	SPP1/THBS1/LRP1/ANXA2/FURIN	5
BP	GO:1903533	regulation of protein targeting	4/233	78/18800	0.0160568	0.0363948	0.017805	RAC2/PRKAA1/FYN/ITGB2	4
BP	GO:0001709	cell fate determination	3/233	43/18800	0.0161103	0.0364169	0.0178159	CDC42/BMP4/CTNNB1	3
BP	GO:0030808	regulation of nucleotide biosynthetic process	3/233	43/18800	0.0161103	0.0364169	0.0178159	SPHK2/PDK4/MYC	3
BP	GO:0042554	superoxide anion generation	3/233	43/18800	0.0161103	0.0364169	0.0178159	TGFB1/ITGB2/SH3PXD2B	3
BP	GO:0042771	intrinsic apoptotic signaling pathway in response to DNA damage by p53 class mediator	3/233	43/18800	0.0161103	0.0364169	0.0178159	TP53/CDKN1A/BCL3	3
BP	GO:0051150	regulation of smooth muscle cell differentiation	3/233	43/18800	0.0161103	0.0364169	0.0178159	KIT/BMP4/EFEMP2	3
BP	GO:0001780	neutrophil homeostasis	2/233	16/18800	0.0163698	0.0366447	0.0179273	AXL/PIK3CD	2
BP	GO:0002371	dendritic cell cytokine production	2/233	16/18800	0.0163698	0.0366447	0.0179273	KIT/JAK3	2
BP	GO:0010224	response to UV-B	2/233	16/18800	0.0163698	0.0366447	0.0179273	CDKN1A/MFAP4	2
BP	GO:0010919	regulation of inositol phosphate biosynthetic process	2/233	16/18800	0.0163698	0.0366447	0.0179273	PTK2B/PTH1R	2
BP	GO:0031268	pseudopodium organization	2/233	16/18800	0.0163698	0.0366447	0.0179273	CDC42/KIT	2
BP	GO:0035970	peptidyl-threonine dephosphorylation	2/233	16/18800	0.0163698	0.0366447	0.0179273	PPM1B/DUSP1	2
BP	GO:0045838	positive regulation of membrane potential	2/233	16/18800	0.0163698	0.0366447	0.0179273	BAD/MYC	2
BP	GO:0050872	white fat cell differentiation	2/233	16/18800	0.0163698	0.0366447	0.0179273	PDGFRA/SNAI2	2
BP	GO:0051938	L-glutamate import	2/233	16/18800	0.0163698	0.0366447	0.0179273	ITGB1/TNF	2
BP	GO:0060033	anatomical structure regression	2/233	16/18800	0.0163698	0.0366447	0.0179273	LEF1/BMPR1A	2
BP	GO:0070886	positive regulation of calcineurin-NFAT signaling cascade	2/233	16/18800	0.0163698	0.0366447	0.0179273	ERBB3/TNF	2
BP	GO:0071391	cellular response to estrogen stimulus	2/233	16/18800	0.0163698	0.0366447	0.0179273	SFRP1/MYC	2
BP	GO:0072109	glomerular mesangium development	2/233	16/18800	0.0163698	0.0366447	0.0179273	PDGFRB/BMP4	2
BP	GO:0072224	metanephric glomerulus development	2/233	16/18800	0.0163698	0.0366447	0.0179273	PDGFRA/PDGFRB	2
BP	GO:0098712	L-glutamate import across plasma membrane	2/233	16/18800	0.0163698	0.0366447	0.0179273	ITGB1/TNF	2
BP	GO:0099633	protein localization to postsynaptic specialization membrane	2/233	16/18800	0.0163698	0.0366447	0.0179273	DLG4/DLG1	2
BP	GO:0099645	neurotransmitter receptor localization to postsynaptic specialization membrane	2/233	16/18800	0.0163698	0.0366447	0.0179273	DLG4/DLG1	2
BP	GO:0106058	positive regulation of calcineurin-mediated signaling	2/233	16/18800	0.0163698	0.0366447	0.0179273	ERBB3/TNF	2
BP	GO:0030301	cholesterol transport	4/233	79/18800	0.0167532	0.0374626	0.0183274	SYT7/LRP1/ANXA2/FURIN	4
BP	GO:1903556	negative regulation of tumor necrosis factor superfamily cytokine production	4/233	79/18800	0.0167532	0.0374626	0.0183274	TNFAIP3/AXL/BCL3/GAS6	4
BP	GO:0032412	regulation of ion transmembrane transporter activity	8/233	263/18800	0.0170952	0.0382069	0.0186916	SPHK2/PTK2B/CAPN1/ITGB1/DLG4/DLG1/MMP9/CTSS	8
BP	GO:0007595	lactation	3/233	44/18800	0.0171343	0.0382121	0.0186941	PRLR/SOCS2/CCND1	3
BP	GO:0010799	regulation of peptidyl-threonine phosphorylation	3/233	44/18800	0.0171343	0.0382121	0.0186941	MAPK1/TGFB1/AXIN1	3
NA	GO:0021762	substantia nigra development	3/233	44/18800	0.0171343	0.0382121	0.0186941	CDC42/ACTB/YWHAQ	3
BP	GO:2000404	regulation of T cell migration	3/233	44/18800	0.0171343	0.0382121	0.0186941	ADAM8/ITGA4/CCL5	3
BP	GO:0007611	learning or memory	8/233	264/18800	0.0174479	0.0388905	0.019026	MAPK1/PTN/FOS/ITGB1/ITGA5/KIT/FYN/DLG4	8
BP	GO:0051279	regulation of release of sequestered calcium ion into cytosol	4/233	80/18800	0.0174683	0.0389151	0.019038	PTK2B/UBASH3B/BAX/CD19	4
BP	GO:2000058	regulation of ubiquitin-dependent protein catabolic process	6/233	166/18800	0.0175109	0.0389892	0.0190743	PTK2/PTK2B/SOCS5/AXIN1/CSNK1D/DVL1	6
BP	GO:0046474	glycerophospholipid biosynthetic process	7/233	214/18800	0.0175534	0.0390628	0.0191103	INPP5D/SOCS2/SOCS5/PIK3CG/PIK3CD/INPP5F/SOCS3	7
BP	GO:0048593	camera-type eye morphogenesis	5/233	122/18800	0.0180289	0.0400996	0.0196175	EPHA2/BAX/BMP4/CTNNB1/SOX9	5
BP	GO:0002861	regulation of inflammatory response to antigenic stimulus	3/233	45/18800	0.0181939	0.0402417	0.019687	TNF/FYN/FURIN	3
BP	GO:0016572	histone phosphorylation	3/233	45/18800	0.0181939	0.0402417	0.019687	PRKAA1/MST1/PRKCB	3
BP	GO:0033003	regulation of mast cell activation	3/233	45/18800	0.0181939	0.0402417	0.019687	SPHK2/RAC2/FOXF1	3
BP	GO:0045197	establishment or maintenance of epithelial cell apical/basal polarity	3/233	45/18800	0.0181939	0.0402417	0.019687	CDC42/DLG1/FOXF1	3
BP	GO:0048538	thymus development	3/233	45/18800	0.0181939	0.0402417	0.019687	MAPK1/RAF1/CTNNB1	3
BP	GO:2000273	positive regulation of signaling receptor activity	3/233	45/18800	0.0181939	0.0402417	0.019687	GREM1/ITGB1/HBEGF	3
BP	GO:0010660	regulation of muscle cell apoptotic process	4/233	81/18800	0.0182021	0.0402417	0.019687	PTK2B/TP53/NOL3/IGF1R	4
BP	GO:0046209	nitric oxide metabolic process	4/233	81/18800	0.0182021	0.0402417	0.019687	PTK2B/TNF/SMAD3/PTX3	4
BP	GO:0055013	cardiac muscle cell development	4/233	81/18800	0.0182021	0.0402417	0.019687	PDGFRA/PDGFRB/BMPR1A/BMP4	4
BP	GO:0016064	immunoglobulin mediated immune response	7/233	216/18800	0.0183725	0.0402417	0.019687	TGFB1/INPP5D/CD19/STAT6/PTPRC/TNF/BCL3	7
BP	GO:0002091	negative regulation of receptor internalization	2/233	17/18800	0.0184026	0.0402417	0.019687	DLG4/ANXA2	2
BP	GO:0003184	pulmonary valve morphogenesis	2/233	17/18800	0.0184026	0.0402417	0.019687	TGFB2/BMP4	2
BP	GO:0006978	DNA damage response, signal transduction by p53 class mediator resulting in transcription of p21 class mediator	2/233	17/18800	0.0184026	0.0402417	0.019687	TP53/CDKN1A	2
BP	GO:0021535	cell migration in hindbrain	2/233	17/18800	0.0184026	0.0402417	0.019687	ITGB1/LEF1	2
BP	GO:0030949	positive regulation of vascular endothelial growth factor receptor signaling pathway	2/233	17/18800	0.0184026	0.0402417	0.019687	ITGA5/PRKCB	2
BP	GO:0034134	toll-like receptor 2 signaling pathway	2/233	17/18800	0.0184026	0.0402417	0.019687	TNFAIP3/PIK3AP1	2
BP	GO:0042481	regulation of odontogenesis	2/233	17/18800	0.0184026	0.0402417	0.019687	CSF1/BMP4	2
BP	GO:0045198	establishment of epithelial cell apical/basal polarity	2/233	17/18800	0.0184026	0.0402417	0.019687	CDC42/FOXF1	2
BP	GO:0045623	negative regulation of T-helper cell differentiation	2/233	17/18800	0.0184026	0.0402417	0.019687	SOCS5/JAK3	2
BP	GO:0046325	negative regulation of glucose import	2/233	17/18800	0.0184026	0.0402417	0.019687	MYC/TNF	2
BP	GO:0046827	positive regulation of protein export from nucleus	2/233	17/18800	0.0184026	0.0402417	0.019687	TCF7L2/GAS6	2
NA	GO:0051412	response to corticosterone	2/233	17/18800	0.0184026	0.0402417	0.019687	FOS/CCND1	2
BP	GO:0051580	regulation of neurotransmitter uptake	2/233	17/18800	0.0184026	0.0402417	0.019687	ITGB1/FLOT1	2
BP	GO:0051895	negative regulation of focal adhesion assembly	2/233	17/18800	0.0184026	0.0402417	0.019687	MMP14/THBS1	2
BP	GO:0060252	positive regulation of glial cell proliferation	2/233	17/18800	0.0184026	0.0402417	0.019687	MYC/TNF	2
BP	GO:0061450	trophoblast cell migration	2/233	17/18800	0.0184026	0.0402417	0.019687	TIMP1/ITGB4	2
BP	GO:0061548	ganglion development	2/233	17/18800	0.0184026	0.0402417	0.019687	FZD3/CTNNB1	2
BP	GO:0072376	protein activation cascade	2/233	17/18800	0.0184026	0.0402417	0.019687	FN1/FBLN1	2
BP	GO:0090136	epithelial cell-cell adhesion	2/233	17/18800	0.0184026	0.0402417	0.019687	THBS4/KIT	2
BP	GO:0090594	inflammatory response to wounding	2/233	17/18800	0.0184026	0.0402417	0.019687	TGFB1/TIMP1	2
BP	GO:0097067	cellular response to thyroid hormone stimulus	2/233	17/18800	0.0184026	0.0402417	0.019687	KIT/CTSS	2
BP	GO:0150118	NA	2/233	17/18800	0.0184026	0.0402417	0.019687	MMP14/THBS1	2
BP	GO:0090066	regulation of anatomical structure size	12/233	487/18800	0.0187429	0.0409644	0.0200406	PTK2B/MMP2/SPP1/LPAR3/FN1/IL7R/GNB3/HCLS1/TNF/WNT7B/DLG1/SERPINF2	12
BP	GO:0021543	pallium development	6/233	169/18800	0.0189497	0.0413406	0.0202246	BAX/BAD/IGF1R/NF2/LEF1/CTNNB1	6
BP	GO:0048639	positive regulation of developmental growth	6/233	169/18800	0.0189497	0.0413406	0.0202246	IL7/LPAR3/FN1/CSF1/TGFBR2/BMPR1A	6
BP	GO:1901983	regulation of protein acetylation	4/233	82/18800	0.0189548	0.0413406	0.0202246	SPHK2/PRKAA1/ARRB1/SNAI2	4
BP	GO:2001057	reactive nitrogen species metabolic process	4/233	82/18800	0.0189548	0.0413406	0.0202246	PTK2B/TNF/SMAD3/PTX3	4
BP	GO:0018210	peptidyl-threonine modification	5/233	124/18800	0.0192018	0.0418353	0.0204666	MAPK1/TGFB1/AXIN1/TGFBR2/PRKCB	5
BP	GO:0046683	response to organophosphorus	5/233	124/18800	0.0192018	0.0418353	0.0204666	PTK2B/FOS/PIK3CG/COL1A1/MMP19	5
BP	GO:0031018	endocrine pancreas development	3/233	46/18800	0.0192891	0.0419597	0.0205275	BAD/BMP4/SOX9	3
BP	GO:0035307	positive regulation of protein dephosphorylation	3/233	46/18800	0.0192891	0.0419597	0.0205275	TGFB1/PDGFRB/PTPRC	3
BP	GO:0035794	positive regulation of mitochondrial membrane permeability	3/233	46/18800	0.0192891	0.0419597	0.0205275	TP53/BAX/BBC3	3
BP	GO:0072331	signal transduction by p53 class mediator	6/233	170/18800	0.0194467	0.0422804	0.0206844	TP53/BAX/CDKN1A/MYC/BCL3/SNAI2	6
BP	GO:0019724	B cell mediated immunity	7/233	219/18800	0.0196509	0.042702	0.0208906	TGFB1/INPP5D/CD19/STAT6/PTPRC/TNF/BCL3	7
BP	GO:0001774	microglial cell activation	3/233	47/18800	0.0204201	0.0440948	0.021572	PTPRC/TNF/ITGB2	3
BP	GO:0032924	activin receptor signaling pathway	3/233	47/18800	0.0204201	0.0440948	0.021572	SMAD3/TGFBR2/SMAD2	3
BP	GO:0036230	granulocyte activation	3/233	47/18800	0.0204201	0.0440948	0.021572	CCL5/TNF/ITGB2	3
BP	GO:0046717	acid secretion	3/233	47/18800	0.0204201	0.0440948	0.021572	MYC/PRKAA1/TNF	3
BP	GO:0048066	developmental pigmentation	3/233	47/18800	0.0204201	0.0440948	0.021572	MITF/BAX/KIT	3
BP	GO:0055010	ventricular cardiac muscle tissue morphogenesis	3/233	47/18800	0.0204201	0.0440948	0.021572	TGFB1/TGFB2/BMPR1A	3
BP	GO:0050672	negative regulation of lymphocyte proliferation	4/233	84/18800	0.0205174	0.0440948	0.021572	INPP5D/IL2RA/BMP4/DLG1	4
BP	GO:0097194	execution phase of apoptosis	4/233	84/18800	0.0205174	0.0440948	0.021572	TP53/BAX/FZD3/BBC3	4
BP	GO:0002076	osteoblast development	2/233	18/18800	0.0205359	0.0440948	0.021572	PTH1R/SMAD3	2
BP	GO:0002693	positive regulation of cellular extravasation	2/233	18/18800	0.0205359	0.0440948	0.021572	ADAM8/IL1R1	2
BP	GO:0002923	regulation of humoral immune response mediated by circulating immunoglobulin	2/233	18/18800	0.0205359	0.0440948	0.021572	PTPRC/TNF	2
BP	GO:0003128	heart field specification	2/233	18/18800	0.0205359	0.0440948	0.021572	AXIN2/BMP4	2
BP	GO:0003159	morphogenesis of an endothelium	2/233	18/18800	0.0205359	0.0440948	0.021572	BMP4/CTNNB1	2
BP	GO:0006977	DNA damage response, signal transduction by p53 class mediator resulting in cell cycle arrest	2/233	18/18800	0.0205359	0.0440948	0.021572	TP53/CDKN1A	2
BP	GO:0008340	determination of adult lifespan	2/233	18/18800	0.0205359	0.0440948	0.021572	TP53/INPP5D	2
BP	GO:0030540	female genitalia development	2/233	18/18800	0.0205359	0.0440948	0.021572	AXL/BAX	2
BP	GO:0032026	response to magnesium ion	2/233	18/18800	0.0205359	0.0440948	0.021572	THBS1/CCND1	2
BP	GO:0033151	V(D)J recombination	2/233	18/18800	0.0205359	0.0440948	0.021572	LEF1/TCF7	2
BP	GO:0042772	DNA damage response, signal transduction resulting in transcription	2/233	18/18800	0.0205359	0.0440948	0.021572	TP53/CDKN1A	2
BP	GO:0060602	branch elongation of an epithelium	2/233	18/18800	0.0205359	0.0440948	0.021572	BMP4/SOX9	2
BP	GO:0061154	endothelial tube morphogenesis	2/233	18/18800	0.0205359	0.0440948	0.021572	BMP4/CTNNB1	2
BP	GO:0090190	positive regulation of branching involved in ureteric bud morphogenesis	2/233	18/18800	0.0205359	0.0440948	0.021572	GREM1/SOX9	2
BP	GO:0150079	negative regulation of neuroinflammatory response	2/233	18/18800	0.0205359	0.0440948	0.021572	PTPRC/TNFRSF1B	2
BP	GO:0050852	T cell receptor signaling pathway	5/233	127/18800	0.0210534	0.0451827	0.0221042	MAPK1/INPP5D/PIK3CD/PTPRC/FYN	5
BP	GO:0010657	muscle cell apoptotic process	4/233	85/18800	0.0213276	0.045724	0.022369	PTK2B/TP53/NOL3/IGF1R	4
BP	GO:0032945	negative regulation of mononuclear cell proliferation	4/233	85/18800	0.0213276	0.045724	0.022369	INPP5D/IL2RA/BMP4/DLG1	4
BP	GO:1903050	regulation of proteolysis involved in cellular protein catabolic process	7/233	223/18800	0.0214507	0.0459643	0.0224866	PTK2/PTK2B/SOCS5/EFNA1/AXIN1/CSNK1D/DVL1	7
BP	GO:0042770	signal transduction in response to DNA damage	6/233	174/18800	0.0215237	0.0460968	0.0225514	TP53/CDKN1A/GADD45A/BCL3/SNAI2/CCND1	6
BP	GO:0006953	acute-phase response	3/233	48/18800	0.0215869	0.0461372	0.0225712	FN1/TNF/SERPINF2	3
BP	GO:0048483	autonomic nervous system development	3/233	48/18800	0.0215869	0.0461372	0.0225712	FN1/FZD3/CTNNB1	3
BP	GO:0050798	activated T cell proliferation	3/233	48/18800	0.0215869	0.0461372	0.0225712	JAK3/IL2RA/FYN	3
BP	GO:0060976	coronary vasculature development	3/233	48/18800	0.0215869	0.0461372	0.0225712	VEGFB/PDGFRB/BMP4	3
BP	GO:0006911	phagocytosis, engulfment	5/233	128/18800	0.0216955	0.0463455	0.0226731	CDC42/RAC2/THBS1/ITGA2/ITGB2	5
BP	GO:1900542	regulation of purine nucleotide metabolic process	4/233	86/18800	0.0221571	0.0473072	0.0231436	SPHK2/PDK4/MYC/PRKAA1	4
BP	GO:0002253	activation of immune response	10/233	386/18800	0.0225802	0.0481381	0.0235501	MAPK1/PTK2/INPP5D/BAX/CD19/PIK3CD/PTPRC/FYN/MFAP4/PRKCB	10
BP	GO:0007213	G protein-coupled acetylcholine receptor signaling pathway	2/233	19/18800	0.0227668	0.0481381	0.0235501	GNB1/CHRM1	2
BP	GO:0032332	positive regulation of chondrocyte differentiation	2/233	19/18800	0.0227668	0.0481381	0.0235501	SMAD3/SOX9	2
BP	GO:0032695	negative regulation of interleukin-12 production	2/233	19/18800	0.0227668	0.0481381	0.0235501	THBS1/JAK3	2
BP	GO:0032930	positive regulation of superoxide anion generation	2/233	19/18800	0.0227668	0.0481381	0.0235501	TGFB1/ITGB2	2
BP	GO:0038092	nodal signaling pathway	2/233	19/18800	0.0227668	0.0481381	0.0235501	SMAD3/SMAD2	2
BP	GO:0043652	engulfment of apoptotic cell	2/233	19/18800	0.0227668	0.0481381	0.0235501	RAC2/THBS1	2
BP	GO:0045603	positive regulation of endothelial cell differentiation	2/233	19/18800	0.0227668	0.0481381	0.0235501	BMP4/CTNNB1	2
BP	GO:0048670	regulation of collateral sprouting	2/233	19/18800	0.0227668	0.0481381	0.0235501	SPP1/LPAR3	2
BP	GO:0051152	positive regulation of smooth muscle cell differentiation	2/233	19/18800	0.0227668	0.0481381	0.0235501	KIT/EFEMP2	2
BP	GO:0051797	regulation of hair follicle development	2/233	19/18800	0.0227668	0.0481381	0.0235501	TGFB2/TNF	2
BP	GO:0055003	cardiac myofibril assembly	2/233	19/18800	0.0227668	0.0481381	0.0235501	PDGFRA/PDGFRB	2
BP	GO:0060039	pericardium development	2/233	19/18800	0.0227668	0.0481381	0.0235501	SMAD3/SMAD2	2
BP	GO:1902170	cellular response to reactive nitrogen species	2/233	19/18800	0.0227668	0.0481381	0.0235501	TRAF2/STAT6	2
BP	GO:1905146	lysosomal protein catabolic process	2/233	19/18800	0.0227668	0.0481381	0.0235501	TPP1/LRP1	2
BP	GO:2000251	positive regulation of actin cytoskeleton reorganization	2/233	19/18800	0.0227668	0.0481381	0.0235501	CDC42/HCLS1	2
BP	GO:0010656	negative regulation of muscle cell apoptotic process	3/233	49/18800	0.0227895	0.0481381	0.0235501	PTK2B/NOL3/IGF1R	3
BP	GO:0050885	neuromuscular process controlling balance	3/233	49/18800	0.0227895	0.0481381	0.0235501	RAC3/TPP1/DLG4	3
BP	GO:0051489	regulation of filopodium assembly	3/233	49/18800	0.0227895	0.0481381	0.0235501	CDC42/TGFB3/FSCN1	3
BP	GO:0060043	regulation of cardiac muscle cell proliferation	3/233	49/18800	0.0227895	0.0481381	0.0235501	RUNX1/TGFBR2/BMPR1A	3
BP	GO:0090102	cochlea development	3/233	49/18800	0.0227895	0.0481381	0.0235501	FZD2/DVL1/SOX9	3
BP	GO:0001892	embryonic placenta development	4/233	87/18800	0.0230061	0.0485217	0.0237377	MAPK1/SOCS3/LEF1/WNT7B	4
BP	GO:0001960	negative regulation of cytokine-mediated signaling pathway	4/233	87/18800	0.0230061	0.0485217	0.0237377	NOL3/PTPRC/CCL5/GAS6	4
BP	GO:0055006	cardiac cell development	4/233	87/18800	0.0230061	0.0485217	0.0237377	PDGFRA/PDGFRB/BMPR1A/BMP4	4
BP	GO:0001659	temperature homeostasis	6/233	177/18800	0.0231764	0.0488314	0.0238893	PRLR/LAMA4/IGF1R/STAT6/TNF/ID1	6
BP	GO:0090276	regulation of peptide hormone secretion	6/233	177/18800	0.0231764	0.0488314	0.0238893	SFRP1/SYT7/BAD/CCL5/TNF/TCF7L2	6
BP	GO:0006644	phospholipid metabolic process	10/233	388/18800	0.0232972	0.0490609	0.0240016	SPHK2/INPP5D/SOCS2/SOCS5/PIK3CG/GNB3/PDGFRB/PIK3CD/INPP5F/SOCS3	10
BP	GO:0000018	regulation of DNA recombination	5/233	131/18800	0.0236981	0.0498799	0.0244022	TGFB1/IL7R/STAT6/PTPRC/ACTB	5
CC	GO:0062023	collagen-containing extracellular matrix	49/233	429/19594	5.96019e-34	1.84766e-31	1.18576e-31	TGFB1/TIMP1/TGFB3/TGM2/MMP2/SFRP1/LTBP3/GREM1/IL7/THBS3/TNXB/LAMA3/COL6A3/COL6A1/COL6A2/LAMA4/THBS4/THBS1/COL4A1/ANGPT4/ITGB4/COL1A1/FN1/LAMC2/ANGPT2/THBS2/LAMA5/TGFB2/MST1/SERPINE1/DLG1/MMP9/CTSS/LOX/SULF1/DPT/SERPINF2/ADAMTS4/EFEMP2/AEBP1/FBLN1/COL27A1/COL12A1/ANXA2/NID2/COL14A1/MMP28/MFAP4/FBLN5	49
CC	GO:0005925	focal adhesion	28/233	419/19594	1.5109e-13	1.27982e-11	8.21343e-12	MAPK1/CDC42/PTK2/MMP14/RAC2/PTK2B/TGM2/CAPN1/EPHA2/ITGB1/ITGB4/ITGA6/ITGA2/ITGA4/ITGA5/ITGB7/PDGFRB/PTPRC/YWHAZ/ITGB2/FZD1/FZD2/ACTB/YWHAQ/PPP1CB/CTNNB1/FLOT1/LRP1	28
CC	GO:0045121	membrane raft	25/233	326/19594	1.54103e-13	1.27982e-11	8.21343e-12	MAPK1/S1PR1/PTK2B/TPP1/INPP5D/ITGB1/CD19/IGF1R/TRAF2/STAT6/PTPRC/TNF/FYN/ITGB2/TGFBR2/BMPR1A/PPP2R1B/DLG1/CTNNB1/SULF1/PDPN/FLOT1/ANXA2/TNFRSF1B/FURIN	25
CC	GO:0098857	membrane microdomain	25/233	327/19594	1.65138e-13	1.27982e-11	8.21343e-12	MAPK1/S1PR1/PTK2B/TPP1/INPP5D/ITGB1/CD19/IGF1R/TRAF2/STAT6/PTPRC/TNF/FYN/ITGB2/TGFBR2/BMPR1A/PPP2R1B/DLG1/CTNNB1/SULF1/PDPN/FLOT1/ANXA2/TNFRSF1B/FURIN	25
CC	GO:0030055	cell-substrate junction	28/233	428/19594	2.5467e-13	1.57895e-11	1.01332e-11	MAPK1/CDC42/PTK2/MMP14/RAC2/PTK2B/TGM2/CAPN1/EPHA2/ITGB1/ITGB4/ITGA6/ITGA2/ITGA4/ITGA5/ITGB7/PDGFRB/PTPRC/YWHAZ/ITGB2/FZD1/FZD2/ACTB/YWHAQ/PPP1CB/CTNNB1/FLOT1/LRP1	28
CC	GO:0005604	basement membrane	15/233	95/19594	4.06571e-13	2.10062e-11	1.3481e-11	TIMP1/LAMA3/LAMA4/THBS4/COL4A1/ITGB4/FN1/LAMC2/THBS2/LAMA5/DLG1/EFEMP2/FBLN1/ANXA2/NID2	15
CC	GO:0005788	endoplasmic reticulum lumen	22/233	311/19594	2.34053e-11	1.03652e-09	6.65204e-10	MAPK1/TIMP1/SPP1/COL6A3/COL6A1/COL6A2/THBS1/COL4A1/COL1A1/FN1/CSF1/WNT4/WNT7B/BMP4/WNT6/FKBP10/CRTAP/GAS6/COL27A1/COL12A1/COL14A1/ADAMTS7	22
CC	GO:0009897	external side of plasma membrane	26/233	455/19594	3.9734e-11	1.53969e-09	9.88123e-10	CTSK/S1PR1/PRLR/CSF3R/IL3RA/PDGFRA/THBS1/ITGB1/ITGA6/ITGA2/IL7R/IL2RG/ITGA4/CD19/ITGA5/KIT/IL2RA/OSMR/IL1R1/PTPRC/TNF/ITGB2/TGFBR2/BMPR1A/ANTXR1/FLOT1	26
NA	GO:0031093	platelet alpha granule lumen	11/233	67/19594	3.7998e-10	1.30882e-08	8.39955e-09	TGFB1/TIMP1/TGFB3/THBS1/FN1/VEGFC/VEGFB/TGFB2/SERPINE1/SERPINF2/GAS6	11
CC	GO:0031091	platelet alpha granule	12/233	91/19594	8.30072e-10	2.57322e-08	1.65141e-08	TGFB1/TIMP1/TGFB3/THBS1/FN1/VEGFC/VEGFB/THBS2/TGFB2/SERPINE1/SERPINF2/GAS6	12
CC	GO:0008305	integrin complex	8/233	31/19594	2.20955e-09	6.22691e-08	3.99622e-08	ITGB1/ITGB4/ITGA6/ITGA2/ITGA4/ITGA5/ITGB7/ITGB2	8
CC	GO:0098636	protein complex involved in cell adhesion	8/233	43/19594	3.59197e-08	9.27925e-07	5.9551e-07	ITGB1/ITGB4/ITGA6/ITGA2/ITGA4/ITGA5/ITGB7/ITGB2	8
CC	GO:0098802	plasma membrane receptor complex	17/233	313/19594	2.26171e-07	5.3933e-06	3.46124e-06	PTK2B/ITGB1/ITGB4/ITGA6/ERBB3/ITGA2/ITGA4/ITGA5/ITGB7/IL2RA/OSMR/IGF1R/TRAF2/ITGB2/DLG4/TGFBR2/BMPR1A	17
CC	GO:0005667	transcription factor complex	21/233	483/19594	3.52731e-07	7.81048e-06	5.0125e-06	TP53/RUNX1/FOS/MYC/RELB/MAX/HCLS1/STAT6/WWTR1/LEF1/SMAD3/TCF7/SMAD1/TEAD2/SMAD2/CCND1/TEAD1/TCF7L2/CTNNB1/FOXF1/SOX9	21
CC	GO:0090575	RNA polymerase II transcription factor complex	14/233	230/19594	7.02733e-07	1.45231e-05	9.32046e-06	RUNX1/FOS/MYC/MAX/STAT6/LEF1/SMAD3/TCF7/SMAD1/TEAD2/SMAD2/TEAD1/TCF7L2/CTNNB1	14
CC	GO:0030139	endocytic vesicle	17/233	342/19594	7.8143e-07	1.51402e-05	9.71646e-06	CDC42/RAC2/ADAM8/SYT7/CSF3R/LPAR1/IL7R/INPP5F/WNT4/FZD4/WNT7B/DLG4/FZD2/WNT6/CTSS/LRP1/HBEGF	17
CC	GO:0005581	collagen trimer	9/233	86/19594	8.46084e-07	1.52426e-05	9.78219e-06	COL6A3/COL6A1/COL6A2/COL4A1/COL1A1/LOX/COL27A1/COL12A1/COL14A1	9
CC	GO:0009898	cytoplasmic side of plasma membrane	12/233	169/19594	8.85055e-07	1.52426e-05	9.78219e-06	PTK2/PTK2B/GNB1/GNG2/GNB3/KIT/TRAF2/PTPN7/PTPRC/FYN/DLG4/DLG1	12
CC	GO:0005942	phosphatidylinositol 3-kinase complex	6/233	29/19594	1.00168e-06	1.63432e-05	1.04885e-05	SOCS2/SOCS5/PIK3CG/PIK3CD/PIK3R5/SOCS3	6
CC	GO:0098562	cytoplasmic side of membrane	12/233	193/19594	3.5673e-06	5.52932e-05	3.54852e-05	PTK2/PTK2B/GNB1/GNG2/GNB3/KIT/TRAF2/PTPN7/PTPRC/FYN/DLG4/DLG1	12
CC	GO:0030666	endocytic vesicle membrane	12/233	194/19594	3.76307e-06	5.55501e-05	3.56501e-05	RAC2/SYT7/CSF3R/IL7R/WNT4/FZD4/WNT7B/DLG4/FZD2/WNT6/LRP1/HBEGF	12
CC	GO:0005796	Golgi lumen	9/233	104/19594	4.20054e-06	5.91894e-05	3.79857e-05	MMP14/TGFB1/WNT4/WNT7B/WNT6/MMP16/GAS6/MMP11/FURIN	9
CC	GO:0005938	cell cortex	15/233	310/19594	4.90733e-06	6.61423e-05	4.24478e-05	PTK2/RAC3/RAC2/PTK2B/LAMC2/TRAF2/HCLS1/AXIN1/NF2/DLG4/ACTB/CTNNB1/FLOT1/FSCN1/PRKCB	15
CC	GO:0030027	lamellipodium	12/233	202/19594	5.70178e-06	7.3648e-05	4.72648e-05	RAC3/RAC2/PTK2B/EPHA2/ITGB1/NF2/ACTB/CTNNB1/PDPN/ANTXR1/FLOT1/FSCN1	12
[truncated: 184 more rows]

## Sheet: KEGG
ID	Description	GeneRatio	BgRatio	pvalue	p.adjust	qvalue	geneID	Count
chx04151	PI3K-Akt signaling pathway	77/199	369/8907	4.30649e-56	9.47428e-54	3.17321e-54	MAPK1/PTK2/RAF1/TP53/EPHA2/IL7/PRLR/THBS3/SPP1/TNXB/LAMA3/TSC2/COL6A3/CSF3R/FGFR1/IL3RA/LPAR3/EFNA4/PIK3CG/PDGFRA/PPP2R2B/COL6A1/COL6A2/LPAR1/LAMA4/THBS4/THBS1/COL4A1/ITGB1/ANGPT4/GNB1/FLT3LG/ITGB4/ITGA6/COL1A1/MAGI1/FN1/CREB5/ERBB3/GNG2/FGF7/ITGA2/IL7R/IL2RG/CSF1/ITGA4/LAMC2/CD19/ANGPT2/CDKN1A/PIK3AP1/VEGFC/VEGFB/BAD/CHRM1/EFNA1/IFNAR2/ITGA5/ITGB7/GNB3/LPAR5/KIT/PDGFRB/JAK3/THBS2/IL2RA/LAMA5/MYC…	77
chx04390	Hippo signaling pathway	53/199	157/8907	8.74816e-50	9.62297e-48	3.22301e-48	TGFB1/TGFB3/PPP2R2B/MYC/TGFB2/AXIN1/WWTR1/WNT4/YWHAZ/NF2/CSNK1D/ITGB2/LEF1/SNAI2/SERPINE1/SMAD3/FZD4/DVL3/FZD1/LOC102180576/WNT7B/TCF7/FRMD6/FZD7/SMAD1/TEAD2/AXIN2/DLG4/FZD2/FBXW11/TGFBR2/BMPR1A/BMP4/ACTB/ID2/BIRC5/SMAD2/CCND1/PATJ/FZD3/YWHAQ/WNT6/PPP2R1B/DVL1/ID1/DLG1/TEAD1/TCF7L2/MOB1B/PPP1CB/FZD6/BBC3/CTNNB1	53
chx05165	Human papillomavirus infection	59/199	356/8907	4.38726e-36	3.21732e-34	1.07757e-34	MAPK1/CDC42/PTK2/RAF1/TP53/BAX/THBS3/SPP1/TNXB/LAMA3/TSC2/COL6A3/PPP2R2B/COL6A1/COL6A2/LAMA4/THBS4/THBS1/COL4A1/ITGB1/ITGB4/ITGA6/COL1A1/MAGI1/FN1/CREB5/ITGA2/ITGA4/LAMC2/CDKN1A/BAD/IFNAR2/ITGA5/ITGB7/PDGFRB/THBS2/LAMA5/PIK3CD/TNF/AXIN1/WNT4/FZD4/DVL3/FZD1/WNT7B/TCF7/FZD7/AXIN2/FZD2/CCND1/PATJ/FZD3/WNT6/PPP2R1B/DVL1/DLG1/TCF7L2/FZD6/CTNNB1	59
chx04510	Focal adhesion	44/199	205/8907	1.22209e-31	6.72152e-30	2.25123e-30	MAPK1/CDC42/PTK2/RAC3/RAF1/RAC2/SHC1/THBS3/SPP1/TNXB/LAMA3/COL6A3/PDGFRA/COL6A1/COL6A2/LAMA4/THBS4/THBS1/COL4A1/ITGB1/ITGB4/ITGA6/COL1A1/FN1/ITGA2/ITGA4/LAMC2/VEGFC/VEGFB/BAD/ITGA5/ITGB7/PDGFRB/THBS2/LAMA5/PIK3CD/IGF1R/FYN/ACTB/CCND1/PPP1CB/CTNNB1/PRKCB/SHC2	44
chx05225	Hepatocellular carcinoma	38/199	175/8907	1.67291e-27	7.3608e-26	2.46534e-26	MAPK1/RAF1/TGFB1/TGFB3/TP53/BAX/SHC1/CDKN1A/BAD/MYC/PIK3CD/IGF1R/TGFB2/GADD45A/AXIN1/WNT4/LEF1/SMAD3/FZD4/DVL3/FZD1/WNT7B/TCF7/FZD7/AXIN2/FZD2/TGFBR2/ACTB/SMAD2/CCND1/FZD3/WNT6/DVL1/TCF7L2/FZD6/CTNNB1/PRKCB/SHC2	38
chx05205	Proteoglycans in cancer	40/199	210/8907	1.29829e-26	4.76041e-25	1.59439e-25	MAPK1/MAPK12/CDC42/PTK2/RAF1/TGFB1/MMP2/TP53/FGFR1/THBS1/ITGB1/COL1A1/FN1/ERBB3/ITGA2/CDKN1A/ITGA5/MYC/PIK3CD/IGF1R/TGFB2/HCLS1/TNF/WNT4/FZD4/FZD1/WNT7B/FZD7/FZD2/ACTB/SMAD2/CCND1/FZD3/WNT6/PPP1CB/FZD6/CTNNB1/MMP9/PRKCB/HBEGF	40
chx05226	Gastric cancer	35/199	152/8907	2.78956e-26	8.76718e-25	2.93637e-25	MAPK1/RAF1/TGFB1/TGFB3/TP53/BAX/SHC1/FGF7/CDKN1A/MYC/PIK3CD/TGFB2/GADD45A/AXIN1/WNT4/LEF1/SMAD3/FZD4/DVL3/FZD1/WNT7B/TCF7/FZD7/AXIN2/FZD2/TGFBR2/SMAD2/CCND1/FZD3/WNT6/DVL1/TCF7L2/FZD6/CTNNB1/SHC2	35
chx05224	Breast cancer	34/199	150/8907	2.69643e-25	7.41519e-24	2.48356e-24	MAPK1/RAF1/TP53/BAX/FOS/SHC1/FGFR1/FGF7/CDKN1A/KIT/MYC/PIK3CD/IGF1R/GADD45A/AXIN1/WNT4/LEF1/FZD4/DVL3/FZD1/WNT7B/TCF7/FZD7/AXIN2/FZD2/CCND1/FZD3/WNT6/DVL1/TCF7L2/FZD6/CTNNB1/NFKB2/SHC2	34
chx05210	Colorectal cancer	27/199	89/8907	6.52774e-24	1.59567e-22	5.34435e-23	MAPK1/RAC3/RAF1/TGFB1/RAC2/TGFB3/TP53/BAX/FOS/CDKN1A/BAD/MYC/PIK3CD/TGFB2/GADD45A/AXIN1/LEF1/SMAD3/TCF7/AXIN2/TGFBR2/BIRC5/SMAD2/CCND1/TCF7L2/BBC3/CTNNB1	27
chx04010	MAPK signaling pathway	43/199	295/8907	1.06611e-23	2.34545e-22	7.85558e-23	MAPK1/MAPK12/CDC42/RAC3/RAF1/TGFB1/RAC2/TGFB3/TP53/EPHA2/FOS/FGFR1/EFNA4/PDGFRA/ANGPT4/FLT3LG/ERBB3/FGF7/CSF1/ANGPT2/VEGFC/VEGFB/EFNA1/KIT/PDGFRB/MYC/IGF1R/IL1R1/RPS6KA3/TRAF2/PPM1B/ARRB1/TGFB2/PTPN7/MAP4K1/RELB/DUSP1/MAX/GADD45A/TNF/TGFBR2/NFKB2/PRKCB	43
chx04550	Signaling pathways regulating pluripotency of stem cells	30/199	143/8907	2.46257e-21	4.92515e-20	1.64957e-20	MAPK1/MAPK12/RAF1/FGFR1/JAK3/MYC/PIK3CD/IGF1R/AXIN1/WNT4/SMAD3/FZD4/DVL3/FZD1/WNT7B/TCF7/FZD7/SMAD1/AXIN2/FZD2/BMPR1A/BMP4/ID2/SMAD2/FZD3/WNT6/DVL1/ID1/FZD6/CTNNB1	30
chx05217	Basal cell carcinoma	22/199	63/8907	3.52857e-21	6.46904e-20	2.16666e-20	TP53/BAX/CDKN1A/GADD45A/AXIN1/WNT4/LEF1/FZD4/DVL3/FZD1/WNT7B/TCF7/FZD7/AXIN2/FZD2/BMP4/FZD3/WNT6/DVL1/TCF7L2/FZD6/CTNNB1	22
chx04015	Rap1 signaling pathway	32/199	211/8907	3.08417e-18	5.21937e-17	1.74812e-17	MAPK1/MAPK12/CDC42/RAC3/RAF1/RAC2/EPHA2/FGFR1/LPAR3/EFNA4/PDGFRA/LPAR1/THBS1/ITGB1/ANGPT4/MAGI1/FGF7/CSF1/ANGPT2/VEGFC/VEGFB/EFNA1/LPAR5/KIT/PDGFRB/PIK3CD/IGF1R/ITGB2/ACTB/ID1/CTNNB1/PRKCB	32
chx04512	ECM-receptor interaction	23/199	96/8907	6.19695e-18	9.73807e-17	3.26155e-17	THBS3/SPP1/TNXB/LAMA3/COL6A3/COL6A1/COL6A2/LAMA4/THBS4/THBS1/COL4A1/ITGB1/ITGB4/ITGA6/COL1A1/FN1/ITGA2/ITGA4/LAMC2/ITGA5/ITGB7/THBS2/LAMA5	23
chx04310	Wnt signaling pathway	28/199	171/8907	6.01062e-17	8.81558e-16	2.95259e-16	RAC3/RAC2/TP53/SFRP1/MYC/AXIN1/WNT4/LEF1/SMAD3/FZD4/DVL3/FZD1/LOC102180576/WNT7B/TCF7/FZD7/AXIN2/FZD2/FBXW11/CCND1/FZD3/WNT6/DVL1/TCF7L2/FZD6/CTNNB1/MMP7/PRKCB	28
chx04933	AGE-RAGE signaling pathway in diabetic complications	22/199	107/8907	1.1077e-15	1.52309e-14	5.10125e-15	MAPK1/MAPK12/CDC42/TGFB1/TGFB3/MMP2/BAX/LOC102185866/COL4A1/COL1A1/FN1/VEGFC/VEGFB/PIK3CD/TGFB2/TNF/SERPINE1/SMAD3/TGFBR2/SMAD2/CCND1/PRKCB	22
chx05161	Hepatitis B	26/199	166/8907	2.58909e-15	3.35059e-14	1.12221e-14	MAPK1/MAPK12/RAF1/TGFB1/PTK2B/TGFB3/TP53/BAX/FOS/LOC102185866/CREB5/CDKN1A/BAD/JAK3/MYC/PIK3CD/TGFB2/STAT6/TNF/YWHAZ/SMAD3/TGFBR2/BIRC5/YWHAQ/MMP9/PRKCB	26
chx05220	Chronic myeloid leukemia	19/199	78/8907	3.8426e-15	4.69651e-14	1.57299e-14	MAPK1/RAF1/TGFB1/TGFB3/TP53/RUNX1/BAX/SHC1/LOC102185866/CDKN1A/BAD/MYC/PIK3CD/TGFB2/GADD45A/SMAD3/TGFBR2/CCND1/SHC2	19
chx04916	Melanogenesis	20/199	100/8907	4.14356e-14	4.79781e-13	1.60692e-13	MAPK1/RAF1/MITF/KIT/WNT4/LEF1/FZD4/DVL3/FZD1/WNT7B/TCF7/FZD7/FZD2/FZD3/WNT6/DVL1/TCF7L2/FZD6/CTNNB1/PRKCB	20
chx05212	Pancreatic cancer	18/199	78/8907	5.84344e-14	6.42778e-13	2.15285e-13	MAPK1/CDC42/RAC3/RAF1/TGFB1/RAC2/TGFB3/TP53/BAX/CDKN1A/BAD/PIK3CD/TGFB2/GADD45A/SMAD3/TGFBR2/SMAD2/CCND1	18
chx05213	Endometrial cancer	16/199	58/8907	7.38979e-14	7.74169e-13	2.59291e-13	MAPK1/RAF1/TP53/BAX/CDKN1A/BAD/MYC/PIK3CD/GADD45A/AXIN1/LEF1/TCF7/AXIN2/CCND1/TCF7L2/CTNNB1	16
chx05222	Small cell lung cancer	19/199	96/8907	2.26288e-13	2.26288e-12	7.57902e-13	PTK2/TP53/BAX/LAMA3/LAMA4/COL4A1/ITGB1/ITGA6/FN1/ITGA2/LAMC2/CDKN1A/LAMA5/MYC/PIK3CD/TRAF2/MAX/GADD45A/CCND1	19
chx04014	Ras signaling pathway	28/199	238/8907	3.49088e-13	3.3391e-12	1.11836e-12	MAPK1/CDC42/RAC3/RAF1/RAC2/EPHA2/SHC1/FGFR1/EFNA4/PDGFRA/ANGPT4/GNB1/FLT3LG/GNG2/FGF7/CSF1/ANGPT2/VEGFC/VEGFB/BAD/EFNA1/GNB3/KIT/PDGFRB/PIK3CD/IGF1R/PRKCB/SHC2	28
chx04926	Relaxin signaling pathway	21/199	134/8907	1.44078e-12	1.32072e-11	4.42346e-12	MAPK1/MAPK12/RAF1/TGFB1/MMP2/FOS/SHC1/COL4A1/GNB1/COL1A1/CREB5/GNG2/VEGFC/VEGFB/GNB3/PIK3CD/ARRB1/TGFBR2/SMAD2/MMP9/SHC2	21
chx05166	Human T-cell leukemia virus 1 infection	26/199	237/8907	1.3215e-11	1.16292e-10	3.89495e-11	MAPK1/TGFB1/TGFB3/TP53/BAX/FOS/LOC102185866/CREB5/IL2RG/CDKN1A/JAK3/IL2RA/MYC/PIK3CD/IL1R1/TGFB2/RELB/TNF/ITGB2/SMAD3/TGFBR2/SMAD2/CCND1/DLG1/MMP7/NFKB2	26
chx04810	Regulation of actin cytoskeleton	25/199	220/8907	1.55258e-11	1.31372e-10	4.40003e-11	MAPK1/CDC42/PTK2/RAC3/RAF1/RAC2/FGFR1/PDGFRA/LPAR1/ITGB1/ITGB4/ITGA6/FN1/FGF7/ITGA2/ITGA4/CHRM1/ITGA5/ITGB7/LPAR5/PDGFRB/PIK3CD/ITGB2/ACTB/PPP1CB	25
chx05163	Human cytomegalovirus infection	26/199	242/8907	2.12936e-11	1.73504e-10	5.81112e-11	MAPK1/MAPK12/PTK2/RAC3/RAF1/RAC2/PTK2B/TP53/BAX/TSC2/PDGFRA/GNB1/CREB5/GNG2/CDKN1A/GNB3/MYC/PIK3CD/IL1R1/TRAF2/CCL5/TNF/IL10RA/CCND1/CTNNB1/PRKCB	26
chx04934	Cushing syndrome	21/199	155/8907	2.57607e-11	2.02406e-10	6.77913e-11	MAPK1/CREB5/CDKN1A/AXIN1/WNT4/LEF1/FZD4/DVL3/FZD1/WNT7B/TCF7/FZD7/AXIN2/FZD2/CCND1/FZD3/WNT6/DVL1/TCF7L2/FZD6/CTNNB1	21
chx01522	Endocrine resistance	17/199	96/8907	2.87758e-11	2.11022e-10	7.06773e-11	MAPK1/MAPK12/PTK2/RAF1/MMP2/TP53/BAX/FOS/SHC1/CDKN1A/BAD/PIK3CD/IGF1R/CCND1/MMP9/HBEGF/SHC2	17
chx04350	TGF-beta signaling pathway	17/199	96/8907	2.87758e-11	2.11022e-10	7.06773e-11	MAPK1/TGFB1/TGFB3/GREM1/THBS1/MYC/TGFB2/TNF/SMAD3/SMAD1/TGFBR2/BMPR1A/BMP4/ID2/SMAD2/PPP2R1B/ID1	17
chx04520	Adherens junction	15/199	71/8907	3.10132e-11	2.20094e-10	7.37156e-11	MAPK1/CDC42/RAC3/RAC2/FGFR1/IGF1R/FYN/LEF1/SNAI2/SMAD3/TCF7/TGFBR2/ACTB/TCF7L2/CTNNB1	15
chx05215	Prostate cancer	17/199	97/8907	3.42139e-11	2.3522e-10	7.8782e-11	MAPK1/RAF1/TP53/FGFR1/PDGFRA/CREB5/CDKN1A/BAD/PDGFRB/PIK3CD/IGF1R/LEF1/TCF7/CCND1/TCF7L2/CTNNB1/MMP9	17
chx05218	Melanoma	15/199	72/8907	3.84136e-11	2.56091e-10	8.57721e-11	MAPK1/RAF1/TP53/MITF/BAX/FGFR1/PDGFRA/FGF7/CDKN1A/BAD/PDGFRB/PIK3CD/IGF1R/GADD45A/CCND1	15
chx04380	Osteoclast differentiation	18/199	121/8907	1.51383e-10	9.79539e-10	3.28075e-10	MAPK1/MAPK12/TGFB1/CTSK/MITF/FOS/CSF1/IFNAR2/PIK3CD/IL1R1/TRAF2/TGFB2/RELB/TNF/FYN/SOCS3/TGFBR2/NFKB2	18
chx04630	JAK-STAT signaling pathway	23/199	207/8907	1.69756e-10	1.06704e-09	3.57381e-10	RAF1/IL7/PRLR/SOCS2/SOCS5/LOC102185866/CSF3R/IL3RA/PDGFRA/IL7R/IL2RG/CDKN1A/IFNAR2/PDGFRB/JAK3/IL2RA/MYC/PIK3CD/OSMR/STAT6/IL10RA/SOCS3/CCND1	23
chx05216	Thyroid cancer	11/199	37/8907	2.70396e-10	1.65242e-09	5.53442e-10	MAPK1/TP53/BAX/CDKN1A/MYC/GADD45A/LEF1/TCF7/CCND1/TCF7L2/CTNNB1	11
chx04150	mTOR signaling pathway	20/199	159/8907	3.08305e-10	1.83316e-09	6.13978e-10	MAPK1/RAF1/TSC2/PIK3CD/PRKAA1/IGF1R/RPS6KA3/TNF/WNT4/FZD4/DVL3/FZD1/WNT7B/FZD7/FZD2/FZD3/WNT6/DVL1/FZD6/PRKCB	20
chx04218	Cellular senescence	20/199	166/8907	6.72434e-10	3.87365e-09	1.29739e-09	MAPK1/MAPK12/RAF1/TGFB1/TGFB3/TP53/CAPN1/TSC2/CDKN1A/MYC/PIK3CD/TGFB2/GADD45A/SERPINE1/SMAD3/FBXW11/TGFBR2/SMAD2/CCND1/PPP1CB	20
chx05214	Glioma	14/199	74/8907	6.86692e-10	3.87365e-09	1.29739e-09	MAPK1/RAF1/TP53/BAX/SHC1/PDGFRA/CDKN1A/PDGFRB/PIK3CD/IGF1R/GADD45A/CCND1/PRKCB/SHC2	14
chx05167	Kaposi sarcoma-associated herpesvirus infection	22/199	208/8907	1.12604e-09	6.19321e-09	2.07428e-09	MAPK1/MAPK12/RAF1/TP53/BAX/FOS/PIK3CG/GNB1/GNG2/ANGPT2/CDKN1A/IFNAR2/GNB3/MYC/PIK3CD/PIK3R5/TRAF2/LEF1/TCF7/CCND1/TCF7L2/CTNNB1	22
chx01521	EGFR tyrosine kinase inhibitor resistance	14/199	80/8907	2.01891e-09	1.08332e-08	3.62835e-09	MAPK1/RAF1/AXL/BAX/SHC1/PDGFRA/ERBB3/BAD/PDGFRB/PIK3CD/IGF1R/GAS6/PRKCB/SHC2	14
chx04370	VEGF signaling pathway	12/199	56/8907	2.62056e-09	1.37268e-08	4.59748e-09	MAPK1/MAPK12/CDC42/PTK2/SPHK2/RAC3/RAF1/RAC2/BAD/PIK3CD/PRKCB/SHC2	12
chx04068	FoxO signaling pathway	17/199	129/8907	3.42554e-09	1.7526e-08	5.86996e-09	MAPK1/MAPK12/RAF1/TGFB1/S1PR1/TGFB3/IL7R/CDKN1A/PIK3CD/PRKAA1/IGF1R/TGFB2/GADD45A/SMAD3/LOC102180576/TGFBR2/CCND1	17
chx05145	Toxoplasmosis	16/199	114/8907	3.97561e-09	1.98781e-08	6.65773e-09	MAPK1/MAPK12/TGFB1/TGFB3/LAMA3/PIK3CG/LAMA4/ITGB1/ITGA6/LAMC2/BAD/LAMA5/PIK3R5/TGFB2/TNF/IL10RA	16
chx04062	Chemokine signaling pathway	20/199	188/8907	6.09259e-09	2.9786e-08	9.97617e-09	MAPK1/CDC42/PTK2/RAC3/RAF1/RAC2/PTK2B/SHC1/PIK3CG/GNB1/GNG2/BAD/GNB3/JAK3/PIK3CD/PIK3R5/ARRB1/CCL5/PRKCB/SHC2	20
chx04668	TNF signaling pathway	16/199	119/8907	7.51931e-09	3.51968e-08	1.17884e-08	MAPK1/MAPK12/MMP14/TNFAIP3/FOS/CREB5/CSF1/VEGFC/PIK3CD/TRAF2/CCL5/TNF/BCL3/SOCS3/MMP9/TNFRSF1B	16
chx05146	Amoebiasis	16/199	119/8907	7.51931e-09	3.51968e-08	1.17884e-08	PTK2/TGFB1/TGFB3/LAMA3/LAMA4/COL4A1/COL1A1/FN1/LAMC2/LAMA5/PIK3CD/IL1R1/TGFB2/TNF/ITGB2/PRKCB	16
chx04071	Sphingolipid signaling pathway	16/199	120/8907	8.50756e-09	3.8993e-08	1.30598e-08	MAPK1/MAPK12/SPHK2/RAC3/RAF1/S1PR1/RAC2/TP53/BAX/PPP2R2B/PIK3CD/TRAF2/TNF/FYN/PPP2R1B/PRKCB	16
chx05219	Bladder cancer	10/199	39/8907	8.94358e-09	4.01548e-08	1.3449e-08	MAPK1/RAF1/MMP2/TP53/THBS1/CDKN1A/MYC/CCND1/MMP9/HBEGF	10
chx04640	Hematopoietic cell lineage	15/199	107/8907	1.26156e-08	5.55085e-08	1.85914e-08	IL7/CSF3R/IL3RA/FLT3LG/ITGA6/ITGA2/IL7R/CSF1/ITGA4/CD19/ITGA5/KIT/IL2RA/IL1R1/TNF	15
chx05160	Hepatitis C	18/199	160/8907	1.50925e-08	6.51049e-08	2.18055e-08	MAPK1/RAF1/TP53/BAX/PPP2R2B/CDKN1A/BAD/IFNAR2/MYC/PIK3CD/TRAF2/TNF/SOCS3/YWHAZ/CCND1/YWHAQ/PPP2R1B/CTNNB1	18
chx05135	Yersinia infection	17/199	143/8907	1.67885e-08	7.10281e-08	2.37893e-08	MAPK1/MAPK12/CDC42/PTK2/RAC3/RAC2/PTK2B/FOS/ITGB1/FN1/ITGA4/ITGA5/PIK3CD/RPS6KA3/TRAF2/TNF/ACTB	17
chx05418	Fluid shear stress and atherosclerosis	17/199	144/8907	1.8666e-08	7.74815e-08	2.59508e-08	MAPK12/PTK2/RAC3/RAC2/MMP2/TP53/FOS/PIK3CD/PRKAA1/IL1R1/DUSP1/TNF/BMPR1A/BMP4/ACTB/CTNNB1/MMP9	17
chx04917	Prolactin signaling pathway	13/199	81/8907	2.31145e-08	9.41703e-08	3.15403e-08	MAPK1/MAPK12/RAF1/FOS/PRLR/SHC1/SOCS2/SOCS5/LOC102185866/PIK3CD/SOCS3/CCND1/SHC2	13
chx04072	Phospholipase D signaling pathway	17/199	147/8907	2.55147e-08	1.02059e-07	3.41823e-08	MAPK1/SPHK2/RAF1/PTK2B/SHC1/TSC2/LPAR3/PIK3CG/PDGFRA/LPAR1/LPAR5/KIT/PDGFRB/PIK3CD/PIK3R5/FYN/SHC2	17
chx05221	Acute myeloid leukemia	12/199	69/8907	3.20755e-08	1.26011e-07	4.22046e-08	MAPK1/RAF1/RUNX1/LOC102185866/BAD/KIT/MYC/PIK3CD/LEF1/TCF7/CCND1/TCF7L2	12
chx04210	Apoptosis	17/199	150/8907	3.45998e-08	1.33543e-07	4.47274e-08	MAPK1/RAF1/CTSK/TP53/CAPN1/BAX/FOS/IL3RA/BAD/PIK3CD/TRAF2/GADD45A/TNF/ACTB/BIRC5/BBC3/CTSS	17
chx04012	ErbB signaling pathway	13/199	85/8907	4.20617e-08	1.59544e-07	5.34359e-08	MAPK1/PTK2/RAF1/SHC1/LOC102185866/ERBB3/CDKN1A/BAD/MYC/PIK3CD/PRKCB/HBEGF/SHC2	13
chx05223	Non-small cell lung cancer	12/199	72/8907	5.2715e-08	1.96564e-07	6.5835e-08	MAPK1/RAF1/TP53/BAX/LOC102185866/CDKN1A/BAD/JAK3/PIK3CD/GADD45A/CCND1/PRKCB	12
chx05206	MicroRNAs in cancer	22/199	258/8907	6.11086e-08	2.24065e-07	7.50457e-08	MAPK1/RAF1/TP53/SHC1/TNXB/EFNA4/PDGFRA/THBS1/ERBB3/CDKN1A/EFNA1/ITGA5/PDGFRB/MYC/PIK3CD/TGFB2/CCND1/FZD3/MMP9/MMP16/FSCN1/PRKCB	22
chx04659	Th17 cell differentiation	14/199	107/8907	9.58621e-08	3.44356e-07	1.15334e-07	MAPK1/MAPK12/TGFB1/RUNX1/FOS/LOC102185866/IL2RG/JAK3/IL2RA/IL1R1/STAT6/SMAD3/TGFBR2/SMAD2	14
chx05410	Hypertrophic cardiomyopathy	13/199	91/8907	9.70457e-08	3.44356e-07	1.15334e-07	TGFB1/TGFB3/ITGB1/ITGB4/ITGA6/ITGA2/ITGA4/ITGA5/ITGB7/PRKAA1/TGFB2/TNF/ACTB	13
chx05412	Arrhythmogenic right ventricular cardiomyopathy	12/199	78/8907	1.32515e-07	4.6275e-07	1.54988e-07	ITGB1/ITGB4/ITGA6/ITGA2/ITGA4/ITGA5/ITGB7/LEF1/TCF7/ACTB/TCF7L2/CTNNB1	12
chx05144	Malaria	10/199	52/8907	1.72827e-07	5.94093e-07	1.98978e-07	TGFB1/TGFB3/THBS3/THBS4/THBS1/THBS2/TGFB2/TNF/ITGB2/LRP1	10
chx04670	Leukocyte transendothelial migration	14/199	113/8907	1.92148e-07	6.40495e-07	2.1452e-07	MAPK12/CDC42/PTK2/RAC2/PTK2B/MMP2/ITGB1/ITGA4/PIK3CD/ITGB2/ACTB/CTNNB1/MMP9/PRKCB	14
chx05142	Chagas disease	14/199	113/8907	1.92148e-07	6.40495e-07	2.1452e-07	MAPK1/MAPK12/TGFB1/TGFB3/FOS/PPP2R2B/PIK3CD/TGFB2/CCL5/TNF/SERPINE1/TGFBR2/SMAD2/PPP2R1B	14
chx04928	Parathyroid hormone synthesis, secretion and action	13/199	106/8907	6.00352e-07	1.97131e-06	6.60246e-07	MAPK1/RAF1/MMP14/PTH1R/FOS/FGFR1/CREB5/CDKN1A/ARRB1/MMP16/MMP25/PRKCB/HBEGF	13
chx05140	Leishmaniasis	11/199	75/8907	7.37715e-07	2.38673e-06	7.99382e-07	MAPK1/MAPK12/TGFB1/TGFB3/FOS/ITGB1/ITGA4/TGFB2/TNF/ITGB2/PRKCB	11
chx05170	Human immunodeficiency virus 1 infection	19/199	231/8907	8.93726e-07	2.84956e-06	9.54399e-07	MAPK1/MAPK12/PTK2/RAC3/RAF1/RAC2/PTK2B/BAX/FOS/GNB1/GNG2/BAD/GNB3/PIK3CD/TRAF2/TNF/FBXW11/TNFRSF1B/PRKCB	19
chx05100	Bacterial invasion of epithelial cells	11/199	78/8907	1.10497e-06	3.47276e-06	1.16313e-06	CDC42/PTK2/SHC1/ITGB1/FN1/ITGA5/PIK3CD/HCLS1/ACTB/CTNNB1/SHC2	11
chx05414	Dilated cardiomyopathy	12/199	95/8907	1.196e-06	3.70592e-06	1.24122e-06	TGFB1/TGFB3/ITGB1/ITGB4/ITGA6/ITGA2/ITGA4/ITGA5/ITGB7/TGFB2/TNF/ACTB	12
chx05010	Alzheimer disease	25/199	387/8907	1.53887e-06	4.7021e-06	1.57487e-06	MAPK1/RAF1/CAPN1/CSF1/BAD/CHRM1/PIK3CD/TRAF2/TNF/AXIN1/WNT4/FZD4/DVL3/FZD1/LOC102180576/WNT7B/FZD7/AXIN2/FZD2/FZD3/WNT6/DVL1/FZD6/CTNNB1/LRP1	25
chx04392	Hippo signaling pathway - multiple species	7/199	28/8907	1.98828e-06	5.99207e-06	2.00691e-06	WWTR1/NF2/LOC102180576/FRMD6/TEAD2/TEAD1/MOB1B	7
chx04935	Growth hormone synthesis, secretion and action	13/199	118/8907	2.07473e-06	6.16813e-06	2.06588e-06	MAPK1/MAPK12/PTK2/RAF1/FOS/SHC1/SOCS2/LOC102185866/CREB5/PIK3CD/SOCS3/PRKCB/SHC2	13
chx05022	Pathways of neurodegeneration - multiple diseases	28/199	476/8907	2.21652e-06	6.50178e-06	2.17763e-06	MAPK1/MAPK12/RAF1/CAPN1/BAX/CSF1/BAD/CHRM1/TRAF2/TNF/AXIN1/WNT4/FZD4/DVL3/FZD1/LOC102180576/WNT7B/FZD7/AXIN2/DLG4/FZD2/FZD3/WNT6/DVL1/FZD6/CTNNB1/TNFRSF1B/PRKCB	28
chx04371	Apelin signaling pathway	14/199	139/8907	2.46515e-06	7.13597e-06	2.39004e-06	MAPK1/SPHK2/RAF1/SPP1/PIK3CG/GNB1/GNG2/GNB3/PIK3R5/PRKAA1/SERPINE1/SMAD3/SMAD2/CCND1	14
chx04662	B cell receptor signaling pathway	10/199	69/8907	2.6699e-06	7.62829e-06	2.55493e-06	MAPK1/RAC3/RAF1/RAC2/INPP5D/FOS/CD19/PIK3AP1/PIK3CD/PRKCB	10
chx04919	Thyroid hormone signaling pathway	13/199	122/8907	3.02885e-06	8.5429e-06	2.86126e-06	MAPK1/RAF1/TP53/TSC2/BAD/MYC/PIK3CD/WNT4/BMP4/ACTB/CCND1/CTNNB1/PRKCB	13
chx04725	Cholinergic synapse	12/199	111/8907	6.31217e-06	1.75782e-05	5.88743e-06	MAPK1/FOS/PIK3CG/GNB1/CREB5/GNG2/CHRM1/GNB3/PIK3CD/PIK3R5/FYN/PRKCB	12
chx04664	Fc epsilon RI signaling pathway	9/199	65/8907	1.25409e-05	3.44873e-05	1.15508e-05	MAPK1/MAPK12/RAC3/RAF1/RAC2/INPP5D/PIK3CD/TNF/FYN	9
chx05230	Central carbon metabolism in cancer	9/199	68/8907	1.82468e-05	4.95592e-05	1.65988e-05	MAPK1/RAF1/TP53/FGFR1/PDGFRA/KIT/PDGFRB/MYC/PIK3CD	9
chx05162	Measles	13/199	145/8907	2.03186e-05	5.39828e-05	1.80804e-05	TNFAIP3/TP53/BAX/FOS/LOC102185866/IL2RG/BAD/IFNAR2/JAK3/IL2RA/PIK3CD/CCND1/BBC3	13
chx05211	Renal cell carcinoma	9/199	69/8907	2.05833e-05	5.39828e-05	1.80804e-05	MAPK1/CDC42/RAF1/TGFB1/TGFB3/CDKN1A/BAD/PIK3CD/TGFB2	9
chx05132	Salmonella infection	18/199	261/8907	2.06116e-05	5.39828e-05	1.80804e-05	MAPK1/MAPK12/CDC42/RAF1/BAX/FOS/PIK3CG/MYC/PIK3CD/TRAF2/PTPRC/TNF/LEF1/TCF7/ACTB/TCF7L2/CTNNB1/ANXA2	18
chx04060	Cytokine-cytokine receptor interaction	21/199	339/8907	2.12322e-05	5.49539e-05	1.84056e-05	TGFB1/TGFB3/IL7/PRLR/CSF3R/IL3RA/IL7R/IL2RG/CSF1/IFNAR2/IL2RA/OSMR/IL1R1/TGFB2/CCL5/TNF/IL10RA/TGFBR2/BMPR1A/BMP4/TNFRSF1B	21
chx05169	Epstein-Barr virus infection	16/199	216/8907	2.52774e-05	6.46632e-05	2.16575e-05	MAPK12/TNFAIP3/TP53/BAX/CD19/CDKN1A/IFNAR2/JAK3/MYC/PIK3CD/TRAF2/RELB/GADD45A/TNF/CCND1/NFKB2	16
chx04110	Cell cycle	12/199	129/8907	2.9463e-05	7.45042e-05	2.49535e-05	TGFB1/TGFB3/TP53/CDKN1A/MYC/TGFB2/GADD45A/YWHAZ/SMAD3/SMAD2/CCND1/YWHAQ	12
chx05203	Viral carcinogenesis	16/199	221/8907	3.34847e-05	8.37118e-05	2.80374e-05	MAPK1/CDC42/TP53/BAX/LOC102185866/CREB5/CDKN1A/BAD/JAK3/PIK3CD/TRAF2/YWHAZ/CCND1/YWHAQ/DLG1/NFKB2	16
chx05202	Transcriptional misregulation in cancer	15/199	199/8907	3.72191e-05	9.20022e-05	3.08141e-05	PTK2/TP53/MITF/RUNX1/BAX/CDKN1A/ITGB7/MYC/IGF1R/MAX/GADD45A/SMAD1/TGFBR2/ID2/MMP9	15
chx04650	Natural killer cell mediated cytotoxicity	13/199	156/8907	4.41299e-05	0.000107873	3.61298e-05	MAPK1/RAC3/RAF1/RAC2/PTK2B/SHC1/IFNAR2/PIK3CD/TNF/FYN/ITGB2/PRKCB/SHC2	13
chx04360	Axon guidance	14/199	180/8907	4.82151e-05	0.000116564	3.90405e-05	MAPK1/CDC42/PTK2/RAC3/RAF1/RAC2/EPHA2/EFNA4/ITGB1/EFNA1/PIK3CD/FYN/WNT4/FZD3	14
chx04910	Insulin signaling pathway	12/199	139/8907	6.17476e-05	0.000147657	4.94546e-05	MAPK1/RAF1/SHC1/SOCS2/TSC2/BAD/PIK3CD/PRKAA1/SOCS3/PPP1CB/FLOT1/SHC2	12
chx05231	Choline metabolism in cancer	10/199	98/8907	6.26844e-05	0.000148286	4.9665e-05	MAPK1/RAC3/RAF1/RAC2/FOS/TSC2/PDGFRA/PDGFRB/PIK3CD/PRKCB	10
chx04722	Neurotrophin signaling pathway	11/199	121/8907	7.85277e-05	0.000183788	6.15559e-05	MAPK1/MAPK12/CDC42/RAF1/TP53/BAX/SHC1/BAD/PIK3CD/RPS6KA3/SHC2	11
chx04660	T cell receptor signaling pathway	10/199	101/8907	8.11396e-05	0.000187902	6.29338e-05	MAPK1/MAPK12/CDC42/RAF1/FOS/PIK3CD/PTPRC/TNF/FYN/DLG1	10
chx05321	Inflammatory bowel disease	8/199	65/8907	9.13726e-05	0.000209395	7.01325e-05	TGFB1/TGFB3/IL2RG/TGFB2/STAT6/TNF/SMAD3/SMAD2	8
chx04115	p53 signaling pathway	9/199	85/8907	0.000109907	0.000249274	8.3489e-05	TP53/BAX/TSC2/THBS1/CDKN1A/GADD45A/SERPINE1/CCND1/BBC3	9
chx05415	Diabetic cardiomyopathy	15/199	219/8907	0.000111232	0.000249705	8.36333e-05	MAPK12/TGFB1/PDK4/RAC2/TGFB3/MMP2/COL1A1/PIK3CD/TGFB2/SMAD3/TGFBR2/SMAD2/PPP1CB/MMP9/PRKCB	15
chx04611	Platelet activation	11/199	128/8907	0.000130642	0.000290316	9.7235e-05	MAPK1/MAPK12/PIK3CG/ITGB1/COL1A1/ITGA2/PIK3CD/PIK3R5/FYN/ACTB/PPP1CB	11
chx04530	Tight junction	13/199	179/8907	0.000180038	0.000396084	0.00013266	CDC42/RUNX1/PPP2R2B/ITGB1/MAGI1/PRKAA1/HCLS1/NF2/ACTB/CCND1/PATJ/PPP2R1B/DLG1	13
chx04728	Dopaminergic synapse	11/199	133/8907	0.000183823	0.000400407	0.000134108	MAPK12/FOS/PPP2R2B/GNB1/CREB5/GNG2/GNB3/ARRB1/PPP2R1B/PPP1CB/PRKCB	11
chx04912	GnRH signaling pathway	9/199	92/8907	0.000202723	0.000437247	0.000146446	MAPK1/MAPK12/CDC42/RAF1/MMP14/PTK2B/MMP2/PRKCB/HBEGF	9
chx05323	Rheumatoid arthritis	9/199	96/8907	0.000280188	0.000598459	0.000200441	TGFB1/CTSK/TGFB3/FOS/CSF1/TGFB2/CCL5/TNF/ITGB2	9
chx04666	Fc gamma R-mediated phagocytosis	9/199	97/8907	0.000302974	0.000640906	0.000214658	MAPK1/CDC42/SPHK2/RAF1/RAC2/INPP5D/PIK3CD/PTPRC/PRKCB	9
chx05152	Tuberculosis	13/199	189/8907	0.000307589	0.000644473	0.000215852	MAPK1/MAPK12/SPHK2/RAF1/TGFB1/TGFB3/BAX/BAD/TGFB2/TNF/IL10RA/ITGB2/CTSS	13
chx01524	Platinum drug resistance	8/199	80/8907	0.00039434	0.000818441	0.000274119	MAPK1/TP53/BAX/CDKN1A/BAD/PIK3CD/BIRC5/BBC3	8
chx05207	Chemical carcinogenesis - receptor activation	14/199	220/8907	0.00040279	0.000828166	0.000277376	MAPK1/RAF1/FOS/LOC102185866/CREB5/FGF7/BAD/MYC/PIK3CD/RPS6KA3/ARRB1/BIRC5/CCND1/PRKCB	14
chx04921	Oxytocin signaling pathway	11/199	153/8907	0.000616485	0.0012558	0.000420604	MAPK1/RAF1/FOS/PIK3CG/CDKN1A/PIK3R5/PRKAA1/ACTB/CCND1/PPP1CB/PRKCB	11
chx04620	Toll-like receptor signaling pathway	9/199	111/8907	0.00081917	0.00165337	0.000553761	MAPK1/MAPK12/CTSK/FOS/SPP1/IFNAR2/PIK3CD/CCL5/TNF	9
chx04658	Th1 and Th2 cell differentiation	8/199	90/8907	0.000872054	0.00173198	0.00058009	MAPK1/MAPK12/FOS/LOC102185866/IL2RG/JAK3/IL2RA/STAT6	8
chx04066	HIF-1 signaling pathway	9/199	112/8907	0.000873864	0.00173198	0.00058009	MAPK1/TIMP1/ANGPT4/ANGPT2/CDKN1A/PIK3CD/IGF1R/SERPINE1/PRKCB	9
chx04915	Estrogen signaling pathway	10/199	136/8907	0.000913507	0.00179439	0.000600992	MAPK1/RAF1/MMP2/FOS/SHC1/CREB5/PIK3CD/MMP9/HBEGF/SHC2	10
chx05340	Primary immunodeficiency	5/199	36/8907	0.00113602	0.00221173	0.000740769	IL7R/IL2RG/CD19/JAK3/PTPRC	5
chx04114	Oocyte meiosis	9/199	123/8907	0.00169603	0.00327303	0.00109623	MAPK1/MAPK12/IGF1R/RPS6KA3/YWHAZ/FBXW11/YWHAQ/PPP2R1B/PPP1CB	9
chx05133	Pertussis	7/199	78/8907	0.00172862	0.00330692	0.00110758	MAPK1/MAPK12/FOS/ITGB1/ITGA5/TNF/ITGB2	7
chx05417	Lipid and atherosclerosis	13/199	229/8907	0.00184434	0.00349789	0.00117154	MAPK1/MAPK12/CDC42/PTK2/TP53/BAX/FOS/BAD/PIK3CD/TRAF2/CCL5/TNF/MMP9	13
chx04625	C-type lectin receptor signaling pathway	8/199	102/8907	0.0019653	0.00369544	0.00123771	MAPK1/MAPK12/RAF1/PIK3CD/RELB/TNF/BCL3/NFKB2	8
chx04064	NF-kappa B signaling pathway	8/199	104/8907	0.00222266	0.00414395	0.00138793	TNFAIP3/IL1R1/TRAF2/RELB/GADD45A/TNF/NFKB2/PRKCB	8
chx04932	Non-alcoholic fatty liver disease	10/199	157/8907	0.00268589	0.00496551	0.00166309	MAPK12/CDC42/TGFB1/BAX/FOS/PIK3CD/PRKAA1/TRAF2/TNF/SOCS3	10
chx04929	GnRH secretion	6/199	64/8907	0.00294597	0.00540095	0.00180893	MAPK1/RAF1/SPP1/PIK3CD/ARRB1/PRKCB	6
chx04540	Gap junction	7/199	88/8907	0.00344568	0.00622054	0.00208343	MAPK1/RAF1/PDGFRA/LPAR1/PDGFRB/CSNK1D/PRKCB	7
chx04930	Type II diabetes mellitus	5/199	46/8907	0.00344957	0.00622054	0.00208343	MAPK1/SOCS2/PIK3CD/TNF/SOCS3	5
chx04211	Longevity regulating pathway	7/199	89/8907	0.0036707	0.00656548	0.00219897	TP53/BAX/TSC2/CREB5/PIK3CD/PRKAA1/IGF1R	7
chx04931	Insulin resistance	8/199	113/8907	0.00372531	0.00660941	0.00221368	CREB5/PIK3CD/PRKAA1/RPS6KA3/TNF/SOCS3/PPP1CB/PRKCB	8
chx05416	Viral myocarditis	6/199	69/8907	0.00429705	0.0075628	0.002533	RAC3/RAC2/FYN/ITGB2/ACTB/CCND1	6
chx04145	Phagosome	10/199	168/8907	0.00436584	0.00762289	0.00255312	THBS3/THBS4/THBS1/ITGB1/ITGA2/ITGA5/THBS2/ITGB2/ACTB/CTSS	10
chx04657	IL-17 signaling pathway	7/199	93/8907	0.00468431	0.00811455	0.00271779	MAPK1/MAPK12/TNFAIP3/FOS/TRAF2/TNF/MMP9	7
chx04710	Circadian rhythm	4/199	32/8907	0.00532658	0.00915506	0.00306629	PRKAA1/CSNK1D/LOC102180576/FBXW11	4
chx05164	Influenza A	10/199	177/8907	0.00628109	0.0107119	0.00358773	MAPK1/RAF1/BAX/IFNAR2/PIK3CD/CCL5/TNF/SOCS3/ACTB/PRKCB	10
chx04152	AMPK signaling pathway	8/199	124/8907	0.00651427	0.0110241	0.0036923	TSC2/PPP2R2B/CREB5/PIK3CD/PRKAA1/IGF1R/CCND1/PPP2R1B	8
chx04061	Viral protein interaction with cytokine and cytokine receptor	7/199	100/8907	0.00694844	0.0116691	0.00390832	IL2RG/CSF1/IL2RA/CCL5/TNF/IL10RA/TNFRSF1B	7
chx04020	Calcium signaling pathway	12/199	238/8907	0.00705036	0.0117506	0.00393561	SPHK2/PTK2B/FGFR1/PDGFRA/ERBB3/FGF7/VEGFC/VEGFB/CHRM1/PDGFRB/MST1/PRKCB	12
chx04340	Hedgehog signaling pathway	5/199	56/8907	0.00803565	0.0132921	0.00445188	ARRB1/CSNK1D/LOC102180576/FBXW11/CCND1	5
chx04730	Long-term depression	5/199	60/8907	0.0106975	0.0175631	0.00588238	MAPK1/RAF1/IGF1R/PPP2R1B/PRKCB	5
chx04217	Necroptosis	9/199	170/8907	0.0139028	0.0226563	0.00758825	TNFAIP3/CAPN1/BAX/LOC102185866/IFNAR2/JAK3/TRAF2/STAT6/TNF	9
chx04720	Long-term potentiation	5/199	66/8907	0.015732	0.0254488	0.00852351	MAPK1/RAF1/RPS6KA3/PPP1CB/PRKCB	5
chx04914	Progesterone-mediated oocyte maturation	6/199	92/8907	0.016796	0.0269717	0.00903359	MAPK1/MAPK12/RAF1/PIK3CD/IGF1R/RPS6KA3	6
chx04974	Protein digestion and absorption	8/199	147/8907	0.0171262	0.0273026	0.00914442	COL6A3/COL6A1/COL6A2/COL4A1/COL1A1/COL27A1/COL12A1/COL14A1	8
chx04024	cAMP signaling pathway	11/199	238/8907	0.0176893	0.0279975	0.00937716	MAPK1/RAC3/RAF1/RAC2/FOS/CREB5/BAD/CHRM1/PIK3CD/PPP1CB/SOX9	11
chx04261	Adrenergic signaling in cardiomyocytes	8/199	151/8907	0.0198044	0.0311212	0.0104234	MAPK1/MAPK12/PIK3CG/PPP2R2B/CREB5/PIK3R5/PPP2R1B/PPP1CB	8
chx04726	Serotonergic synapse	7/199	123/8907	0.0201416	0.0314267	0.0105257	MAPK1/RAF1/GNB1/GNG2/GNB3/DUSP1/PRKCB	7
chx04936	Alcoholic liver disease	8/199	152/8907	0.0205182	0.0317887	0.0106469	MAPK12/PRKAA1/TNF/LEF1/TCF7/CCND1/TCF7L2/CTNNB1	8
chx04920	Adipocytokine signaling pathway	5/199	71/8907	0.0209741	0.0322679	0.0108074	PRKAA1/TRAF2/TNF/SOCS3/TNFRSF1B	5
chx04713	Circadian entrainment	6/199	98/8907	0.0222377	0.0339742	0.0113789	MAPK1/FOS/GNB1/GNG2/GNB3/PRKCB	6
chx04724	Glutamatergic synapse	6/199	111/8907	0.0378294	0.0573963	0.0192236	MAPK1/GNB1/GNG2/GNB3/DLG4/PRKCB	6
chx05034	Alcoholism	9/199	203/8907	0.0382207	0.0575928	0.0192894	MAPK1/RAF1/SHC1/GNB1/CREB5/GNG2/GNB3/PPP1CB/SHC2	9
chx04215	Apoptosis - multiple species	3/199	35/8907	0.0425974	0.0637512	0.0213521	BAX/BIRC5/BBC3	3
chx04140	Autophagy - animal	7/199	145/8907	0.043717	0.0649847	0.0217652	MAPK1/RAF1/TSC2/BAD/PIK3CD/PRKAA1/IGF1R	7
chx04621	NOD-like receptor signaling pathway	8/199	178/8907	0.0460288	0.067962	0.0227624	MAPK1/MAPK12/TNFAIP3/IFNAR2/TRAF2/CCL5/TNF/ANTXR1	8
chx05235	PD-L1 expression and PD-1 checkpoint pathway in cancer	5/199	88/8907	0.0467768	0.068606	0.0229781	MAPK1/MAPK12/RAF1/FOS/PIK3CD	5
chx04960	Aldosterone-regulated sodium reabsorption	3/199	38/8907	0.052326	0.0762365	0.0255338	MAPK1/PIK3CD/PRKCB	3
chx05032	Morphine addiction	5/199	91/8907	0.0526874	0.076258	0.025541	GNB1/GNG2/GNB3/ARRB1/PRKCB	5
chx05143	African trypanosomiasis	3/199	39/8907	0.0557869	0.0802165	0.0268668	LAMA4/TNF/PRKCB	3
chx05031	Amphetamine addiction	4/199	70/8907	0.0709887	0.101412	0.0339659	FOS/CREB5/PPP1CB/PRKCB	4
chx00562	Inositol phosphate metabolism	4/199	72/8907	0.0770235	0.109324	0.0366156	INPP5D/PIK3CG/PIK3CD/INPP5F	4
chx05020	Prion disease	10/199	271/8907	0.0821785	0.115375	0.0386422	MAPK1/MAPK12/RAC2/BAX/CREB5/BAD/PIK3CD/CCL5/TNF/FYN	10
chx04022	cGMP-PKG signaling pathway	7/199	168/8907	0.0823356	0.115375	0.0386422	MAPK1/RAF1/PIK3CG/CREB5/BAD/PIK3R5/PPP1CB	7
chx04672	Intestinal immune network for IgA production	3/199	47/8907	0.0871546	0.121355	0.0406451	TGFB1/ITGA4/ITGB7	3
chx04613	Neutrophil extracellular trap formation	8/199	205/8907	0.0885492	0.122521	0.0410357	MAPK1/MAPK12/RAF1/RAC2/PIK3CD/ITGB2/ACTB/PRKCB	8
chx04723	Retrograde endocannabinoid signaling	6/199	145/8907	0.105943	0.145672	0.0487897	MAPK1/MAPK12/GNB1/GNG2/GNB3/PRKCB	6
chx04750	Inflammatory mediator regulation of TRP channels	5/199	113/8907	0.108573	0.14836	0.04969	MAPK12/PIK3CD/IL1R1/PPP1CB/PRKCB	5
chx04144	Endocytosis	9/199	255/8907	0.117594	0.159695	0.0534864	CDC42/PDGFRA/IL2RG/IL2RA/IGF1R/ARRB1/SMAD3/TGFBR2/SMAD2	9
chx04727	GABAergic synapse	4/199	89/8907	0.137792	0.185977	0.062289	GNB1/GNG2/GNB3/PRKCB	4
chx05134	Legionellosis	3/199	60/8907	0.149998	0.201217	0.0673932	TNF/ITGB2/NFKB2	3
chx04213	Longevity regulating pathway - multiple species	3/199	62/8907	0.160709	0.214278	0.0717679	PIK3CD/PRKAA1/IGF1R	3
chx04070	Phosphatidylinositol signaling system	4/199	97/8907	0.171467	0.227246	0.076111	INPP5D/PIK3CD/INPP5F/PRKCB	4
chx04514	Cell adhesion molecules	6/199	168/8907	0.17378	0.228932	0.0766757	ITGB1/ITGA6/ITGA4/ITGB7/PTPRC/ITGB2	6
chx04714	Thermogenesis	7/199	237/8907	0.27933	0.363625	0.121788	MAPK12/TSC2/FGFR1/CREB5/PRKAA1/RPS6KA3/ACTB	7
chx05208	Chemical carcinogenesis - reactive oxygen species	7/199	237/8907	0.27933	0.363625	0.121788	MAPK1/MAPK12/PTK2/RAF1/FOS/BAD/PIK3CD	7
chx04973	Carbohydrate digestion and absorption	2/199	47/8907	0.282875	0.365778	0.122509	PIK3CD/PRKCB	2
chx05168	Herpes simplex virus 1 infection	12/199	442/8907	0.284309	0.365778	0.122509	TP53/BAX/TSC2/BAD/IFNAR2/ITGA5/PIK3CD/TRAF2/CCL5/TNF/SOCS3/PPP1CB	12
chx05030	Cocaine addiction	2/199	50/8907	0.307797	0.393694	0.131859	CREB5/DLG4	2
chx04961	Endocrine and other factor-regulated calcium reabsorption	2/199	52/8907	0.324322	0.412433	0.138136	PTH1R/PRKCB	2
chx04610	Complement and coagulation cascades	3/199	93/8907	0.344678	0.435799	0.145962	ITGB2/SERPINE1/SERPINF2	3
chx05171	Coronavirus disease - COVID-19	8/199	301/8907	0.359119	0.451464	0.151208	MAPK1/MAPK12/FOS/IFNAR2/PIK3CD/TNF/PRKCB/HBEGF	8
chx03015	mRNA surveillance pathway	3/199	97/8907	0.369185	0.461481	0.154563	PPP2R2B/PPP2R1B/PPP1CB	3
chx04330	Notch signaling pathway	2/199	58/8907	0.3732	0.463865	0.155361	DVL3/DVL1	2
chx04270	Vascular smooth muscle contraction	4/199	145/8907	0.407275	0.503373	0.168594	MAPK1/RAF1/PPP1CB/PRKCB	4
chx04622	RIG-I-like receptor signaling pathway	3/199	106/8907	0.423613	0.520641	0.174377	MAPK12/TRAF2/TNF	3
chx04744	Phototransduction	1/199	28/8907	0.469344	0.570473	0.191068	GNB1	1
chx05310	Asthma	1/199	28/8907	0.469344	0.570473	0.191068	TNF	1
chx04137	Mitophagy - animal	2/199	72/8907	0.480839	0.581235	0.194672	TP53/MITF	2
chx00052	Galactose metabolism	1/199	31/8907	0.504234	0.606183	0.203028	AKR1B1	1
chx04918	Thyroid hormone synthesis	2/199	77/8907	0.516494	0.617547	0.206834	CREB5/PRKCB	2
chx00051	Fructose and mannose metabolism	1/199	33/8907	0.526216	0.625771	0.209588	AKR1B1	1
chx04971	Gastric acid secretion	2/199	79/8907	0.530297	0.626831	0.209943	ACTB/PRKCB	2
chx05016	Huntington disease	7/199	307/8907	0.532806	0.626831	0.209943	TGM2/TP53/BAX/CREB5/TRAF2/DLG4/BBC3	7
chx00040	Pentose and glucuronate interconversions	1/199	37/8907	0.567313	0.66359	0.222255	AKR1B1	1
chx04612	Antigen processing and presentation	2/199	85/8907	0.570084	0.66359	0.222255	TNF/CTSS	2
chx04911	Insulin secretion	2/199	87/8907	0.582796	0.674816	0.226015	CREB5/PRKCB	2
chx05014	Amyotrophic lateral sclerosis	8/199	372/8907	0.595281	0.685664	0.229648	MAPK12/TP53/BAX/BAD/TRAF2/TNF/ACTB/TNFRSF1B	8
chx04142	Lysosome	3/199	138/8907	0.599678	0.687132	0.23014	CTSK/TPP1/CTSS	3
chx00790	Folate biosynthesis	1/199	42/8907	0.613731	0.699589	0.234312	AKR1B1	1
chx05017	Spinocerebellar ataxia	3/199	144/8907	0.628577	0.708129	0.237172	PIK3CD/TRAF2/PRKCB	3
chx04925	Aldosterone synthesis and secretion	2/199	95/8907	0.630871	0.708129	0.237172	CREB5/PRKCB	2
chx01523	Antifolate resistance	1/199	44/8907	0.630879	0.708129	0.237172	TNF	1
chx04962	Vasopressin-regulated water reabsorption	1/199	47/8907	0.655191	0.731685	0.245062	CREB5	1
chx04216	Ferroptosis	1/199	48/8907	0.662935	0.736595	0.246706	TP53	1
chx04979	Cholesterol metabolism	1/199	50/8907	0.677909	0.749447	0.251011	LRP1	1
chx04922	Glucagon signaling pathway	2/199	105/8907	0.684786	0.753264	0.252289	CREB5/PRKAA1	2
chx05330	Allograft rejection	1/199	55/8907	0.712511	0.779862	0.261198	TNF	1
chx00600	Sphingolipid metabolism	1/199	57/8907	0.725292	0.789922	0.264567	SPHK2	1
chx04141	Protein processing in endoplasmic reticulum	3/199	171/8907	0.740484	0.802495	0.268778	CAPN1/BAX/TRAF2	3
chx04923	Regulation of lipolysis in adipocytes	1/199	61/8907	0.749183	0.807943	0.270603	PIK3CD	1
chx04940	Type I diabetes mellitus	1/199	62/8907	0.754826	0.810057	0.271311	TNF	1
chx04623	Cytosolic DNA-sensing pathway	1/199	64/8907	0.765734	0.811585	0.271823	CCL5	1
chx05332	Graft-versus-host disease	1/199	64/8907	0.765734	0.811585	0.271823	TNF	1
chx04913	Ovarian steroidogenesis	1/199	65/8907	0.771006	0.811585	0.271823	IGF1R	1
chx04927	Cortisol synthesis and secretion	1/199	65/8907	0.771006	0.811585	0.271823	CREB5	1
chx03250	Viral life cycle - HIV-1	1/199	68/8907	0.786124	0.823558	0.275833	FURIN	1
chx00561	Glycerolipid metabolism	1/199	72/8907	0.804747	0.839073	0.281029	AKR1B1	1
chx04146	Peroxisome	1/199	82/8907	0.844544	0.873013	0.292397	MPV17	1
chx04120	Ubiquitin mediated proteolysis	2/199	149/8907	0.850326	0.873013	0.292397	SOCS3/FBXW11	2
chx04742	Taste transduction	1/199	84/8907	0.851476	0.873013	0.292397	GNB3	1
chx04080	Neuroactive ligand-receptor interaction	6/199	377/8907	0.853172	0.873013	0.292397	S1PR1/PTH1R/PRLR/LPAR3/LPAR1/CHRM1	6
chx05150	Staphylococcus aureus infection	1/199	92/8907	0.876262	0.891208	0.298491	ITGB2	1
chx04970	Salivary secretion	1/199	93/8907	0.879055	0.891208	0.298491	PRKCB	1
chx04972	Pancreatic secretion	1/199	105/8907	0.908061	0.916392	0.306926	PRKCB	1
chx05012	Parkinson disease	3/199	271/8907	0.944982	0.949297	0.317946	TP53/BAX/DUSP1	3
chx05322	Systemic lupus erythematosus	1/199	151/8907	0.967977	0.967977	0.324203	TNF	1
