# Supplementary material for: Transcriptome Analysis of Goat Mammary Gland Tissue Reveals the Adaptive Strategies and Molecular Mechanisms of Lactation and Involution
Source: Int J Mol Sci. 2022 Nov 20;23(22):14424. doi: 10.3390/ijms232214424 (PMC9693614; doi:10.3390/ijms232214424)
Supplement: Supplementary file 1 [file ijms-23-14424-s001.zip › Table S12.xlsx]

## Sheet: Sheet1
ID	Cluster
NM_001285667.1(SPP1)	3
NM_001285724.1(KIT)	2
NM_001314156.1(ITGB1)	2
NM_001314202.1(MAPK1)	4
XM_005676508.3(FN1)	5
XM_005677404.3(THBS3)	5
XM_005679262.2(CREB5)	1
XM_005680373.3(ERBB3)	1
XM_005681627.3(PDGFRA)	1
XM_005683109.3(PPP2R2B)	3
XM_005685652.3(GNG2)	1
XM_005685797.3(FGF7)	1
XM_005693530.3(TP53)	1
XM_005694721.3(ITGA2)	5
XM_005694804.3(IL7R)	1
XM_005700681.3(IL2RG)	1
XM_013962557.2(CSF1)	1
XM_013963034.2(COL6A3)	1
XM_013964504.2(SPP1)	4
XM_013964633.2(PDGFRA)	1
XM_013965670.2(PPP2R2B)	3
XM_013968519.2(ITGA4)	1
XM_013970345.2(LAMC2)	3
XM_013972803.2(PRLR)	4
XM_013972806.2(PRLR)	2
XM_013974716.2(CD19)	5
XM_013975359.2(ANGPT2)	2
XM_018038908.1(TNXB)	4
XM_018039118.1(CDKN1A)	1
XM_018039637.1(LAMA3)	3
XM_018039638.1(LAMA3)	5
XM_018039824.1(TSC2)	4
XM_018039826.1(TSC2)	3
XM_018039829.1(TSC2)	3
XM_018039830.1(TSC2)	3
XM_018040698.1(COL6A3)	5
XM_018040704.1(COL6A3)	2
XM_018040712.1(COL6A3)	4
XM_018040719.1(COL6A3)	1
XM_018040727.1(COL6A3)	3
XM_018040741.1(COL6A3)	4
XM_018041577.1(PIK3AP1)	5
XM_018041756.1(CSF3R)	4
XM_018041770.1(FGFR1)	3
XM_018041774.1(FGFR1)	4
XM_018041778.1(FGFR1)	3
XM_018041779.1(FGFR1)	4
XM_018041780.1(FGFR1)	1
XM_018041781.1(FGFR1)	3
XM_018041782.1(FGFR1)	1
XM_018042109.1(VEGFC)	5
XM_018042785.1(VEGFB)	3
XM_018042786.1(VEGFB)	5
XM_018042787.1(VEGFB)	3
XM_018042790.1(BAD)	4
XM_018042791.1(BAD)	1
XM_018043271.1(CCND1)	2
XM_018043586.1(CHRM1)	5
XM_018044368.1(MAPK1)	3
XM_018044556.1(IL3RA)	4
XM_018044557.1(IL3RA)	1
XM_018044558.1(IL3RA)	1
XM_018045685.1(LPAR3)	4
XM_018045882.1(CSF1)	1
XM_018046223.1(EFNA4)	4
XM_018046224.1(EFNA4)	3
XM_018046225.1(EFNA4)	5
XM_018046228.1(EFNA1)	5
XM_018046609.1(IFNAR2)	1
XM_018047231.1(PIK3CG)	4
XM_018047641.1(ITGA5)	5
XM_018047683.1(ITGB7)	1
XM_018048555.1(GNB3)	5
XM_018048574.1(LPAR5)	1
XM_018049156.1(KIT)	5
XM_018049462.1(PDGFRA)	4
XM_018050163.1(PDGFRB)	5
XM_018050189.1(PPP2R2B)	4
XM_018050190.1(PPP2R2B)	3
XM_018051403.1(JAK3)	1
XM_018052320.1(COL6A1)	4
XM_018052339.1(COL6A2)	5
XM_018052587.1(LPAR1)	4
XM_018053048.1(LAMA4)	2
XM_018053049.1(LAMA4)	2
XM_018053050.1(LAMA4)	4
XM_018053486.1(THBS2)	5
XM_018053668.1(THBS4)	4
XM_018054472.1(THBS1)	2
XM_018054473.1(THBS1)	2
XM_018054474.1(THBS1)	4
XM_018054475.1(THBS1)	2
XM_018054593.1(EPHA2)	4
XM_018054598.1(EPHA2)	1
XM_018055677.1(YWHAQ)	3
XM_018055678.1(YWHAQ)	2
XM_018056364.1(COL4A1)	4
XM_018056844.1(ITGB1)	4
XM_018056845.1(ITGB1)	3
XM_018056950.1(IL2RA)	1
XM_018057585.1(LAMA5)	5
XM_018057652.1(ANGPT4)	5
XM_018058313.1(YWHAZ)	2
XM_018058314.1(YWHAZ)	3
XM_018058383.1(IL7)	5
XM_018058563.1(MYC)	1
XM_018058615.1(PTK2)	4
XM_018058629.1(PTK2)	3
XM_018059785.1(FN1)	3
XM_018059789.1(FN1)	3
XM_018059793.1(FN1)	1
XM_018059799.1(PPP2R1B)	2
XM_018059817.1(FN1)	1
XM_018059825.1(FN1)	1
XM_018059841.1(FN1)	3
XM_018060378.1(PIK3CD)	4
XM_018060379.1(PIK3CD)	1
XM_018060493.1(GNB1)	3
XM_018060494.1(GNB1)	4
XM_018060496.1(GNB1)	3
XM_018062782.1(FLT3LG)	1
XM_018062784.1(FLT3LG)	5
XM_018062786.1(FLT3LG)	5
XM_018063797.1(ITGB4)	5
XM_018063799.1(ITGB4)	5
XM_018063800.1(ITGB4)	3
XM_018063801.1(ITGB4)	3
XM_018063802.1(ITGB4)	3
XM_018063803.1(ITGB4)	3
XM_018064642.1(PIK3R5)	1
XM_018064644.1(PIK3R5)	1
XM_018064673.1(ITGA6)	4
XM_018064676.1(ITGA6)	2
XM_018064893.1(COL1A1)	4
XM_018064895.1(COL1A1)	2
XM_018065466.1(PRLR)	4
XM_018065467.1(PRLR)	4
XM_018065500.1(PRKAA1)	2
XM_018065501.1(PRKAA1)	1
XM_018065635.1(OSMR)	5
XM_018065947.1(IGF1R)	3
XM_018066858.1(MAGI1)	4
XM_018066958.1(RAF1)	3
XM_018066959.1(RAF1)	4
XM_018066962.1(RAF1)	3
XR_001917456.1(VEGFB)	3
