# Supplementary material for: Transcriptome Analysis of Goat Mammary Gland Tissue Reveals the Adaptive Strategies and Molecular Mechanisms of Lactation and Involution
Source: Int J Mol Sci. 2022 Nov 20;23(22):14424. doi: 10.3390/ijms232214424 (PMC9693614; doi:10.3390/ijms232214424)
Supplement: Supplementary file 1 [file ijms-23-14424-s001.zip › Table S13.xlsx]

## Sheet: Apoptosis and autophagy
#node1	node2	node1_string_id	node2_string_id	neighborhood_on_chromosome	gene_fusion	phylogenetic_cooccurrence	homology	coexpression	experimentally_determined_interaction	database_annotated	automated_textmining	combined_score
ACTB	MAPK1	9606.ENSP00000349960	9606.ENSP00000215832	0	0	0	0	0.049	0.064	0	0.607	0.62
ACTB	NFKBIA	9606.ENSP00000349960	9606.ENSP00000216797	0	0	0	0	0	0.103	0	0.844	0.854
ACTB	TSC2	9606.ENSP00000349960	9606.ENSP00000219476	0	0	0	0	0	0	0	0.527	0.527
ACTB	RPS6KB1	9606.ENSP00000349960	9606.ENSP00000225577	0	0	0	0	0	0.076	0	0.744	0.753
ACTB	CTSD	9606.ENSP00000349960	9606.ENSP00000236671	0	0	0	0	0.099	0.057	0	0.543	0.578
ACTB	RAF1	9606.ENSP00000349960	9606.ENSP00000251849	0	0	0	0	0.053	0.078	0	0.569	0.591
ACTB	KRAS	9606.ENSP00000349960	9606.ENSP00000256078	0	0	0	0	0	0.104	0	0.689	0.709
ACTB	EIF2S1	9606.ENSP00000349960	9606.ENSP00000256383	0	0	0	0	0.063	0	0	0.615	0.624
ACTB	RIPK1	9606.ENSP00000349960	9606.ENSP00000259808	0	0	0	0	0.053	0.078	0	0.469	0.495
ACTB	LMNB1	9606.ENSP00000349960	9606.ENSP00000261366	0	0	0	0	0.089	0.212	0	0.715	0.778
ACTB	PIK3C3	9606.ENSP00000349960	9606.ENSP00000262039	0	0	0	0	0.056	0.153	0	0.493	0.559
ACTB	PIK3CA	9606.ENSP00000349960	9606.ENSP00000263967	0	0	0	0	0	0.153	0	0.552	0.604
ACTB	BCL2A1	9606.ENSP00000349960	9606.ENSP00000267953	0	0	0	0	0	0.056	0	0.403	0.412
ACTB	IGF1R	9606.ENSP00000349960	9606.ENSP00000268035	0	0	0	0	0.053	0.078	0	0.625	0.644
ACTB	MAP1LC3B	9606.ENSP00000349960	9606.ENSP00000268607	0	0	0	0	0.065	0.094	0	0.792	0.808
ACTB	TP53	9606.ENSP00000349960	9606.ENSP00000269305	0	0	0	0	0.062	0.128	0	0.881	0.894
ACTB	CTSK	9606.ENSP00000349960	9606.ENSP00000271651	0	0	0	0	0	0	0	0.551	0.551
ACTB	BAX	9606.ENSP00000349960	9606.ENSP00000293288	0	0	0	0	0.066	0.056	0	0.606	0.622
ACTB	TUBA1A	9606.ENSP00000349960	9606.ENSP00000301071	0	0	0	0	0.166	0.176	0.3	0.584	0.774
ACTB	BIRC5	9606.ENSP00000349960	9606.ENSP00000301633	0	0	0	0	0	0.06	0	0.457	0.467
ACTB	BCL2L1	9606.ENSP00000349960	9606.ENSP00000302564	0	0	0	0	0.052	0.069	0	0.798	0.807
ACTB	IRS1	9606.ENSP00000349960	9606.ENSP00000304895	0	0	0	0	0	0	0	0.649	0.649
ACTB	FOS	9606.ENSP00000349960	9606.ENSP00000306245	0	0	0	0	0	0	0	0.715	0.715
ACTB	ITPR1	9606.ENSP00000349960	9606.ENSP00000306253	0	0	0	0	0.068	0.071	0	0.44	0.473
ACTB	RPTOR	9606.ENSP00000349960	9606.ENSP00000307272	0	0	0	0	0.064	0	0	0.544	0.555
ACTB	ULK1	9606.ENSP00000349960	9606.ENSP00000324560	0	0	0	0	0	0.058	0	0.397	0.408
ACTB	STK11	9606.ENSP00000349960	9606.ENSP00000324856	0	0	0	0	0	0.078	0	0.513	0.532
ACTB	PMAIP1	9606.ENSP00000349960	9606.ENSP00000326119	0	0	0	0	0	0	0	0.564	0.564
ACTB	LMNB2	9606.ENSP00000349960	9606.ENSP00000327054	0	0	0	0	0.09	0.212	0	0.427	0.553
ACTB	ATF4	9606.ENSP00000349960	9606.ENSP00000336790	0	0	0	0	0	0	0	0.543	0.543
ACTB	CTSL	9606.ENSP00000349960	9606.ENSP00000345344	0	0	0	0	0.063	0	0	0.455	0.467
ACTB	HMGB1	9606.ENSP00000349960	9606.ENSP00000345347	0	0	0	0	0.062	0.139	0.9	0.577	0.961
ACTB	CTSB	9606.ENSP00000349960	9606.ENSP00000345672	0	0	0	0	0.062	0	0	0.538	0.548
ACTB	PRKAA1	9606.ENSP00000349960	9606.ENSP00000346148	0	0	0	0	0	0.078	0	0.38	0.404
ACTB	ATG7	9606.ENSP00000349960	9606.ENSP00000346437	0	0	0	0	0.055	0.079	0	0.654	0.672
ACTB	FAS	9606.ENSP00000349960	9606.ENSP00000347979	0	0	0	0	0.062	0	0	0.48	0.491
ACTB	BAK1	9606.ENSP00000349960	9606.ENSP00000363591	0	0	0	0	0.081	0.056	0	0.366	0.402
ACTB	PIK3CD	9606.ENSP00000349960	9606.ENSP00000366563	0	0	0	0	0	0.153	0	0.331	0.409
ACTB	AKT1S1	9606.ENSP00000349960	9606.ENSP00000375711	0	0	0	0	0	0	0	0.429	0.429
ACTB	PRF1	9606.ENSP00000349960	9606.ENSP00000398568	0	0	0	0	0	0	0	0.451	0.452
ACTB	CAPN1	9606.ENSP00000349960	9606.ENSP00000431984	0	0	0	0	0.092	0.057	0	0.434	0.473
ACTB	GADD45A	9606.ENSP00000349960	9606.ENSP00000360025	0	0	0	0	0	0	0	0.481	0.481
ACTB	IRS2	9606.ENSP00000349960	9606.ENSP00000365016	0	0	0	0	0	0	0	0.499	0.499
ACTB	ATG12	9606.ENSP00000349960	9606.ENSP00000425107	0	0	0	0	0	0.069	0	0.544	0.557
ACTB	LAMP2	9606.ENSP00000349960	9606.ENSP00000408411	0	0	0	0	0	0.062	0	0.552	0.561
ACTB	SPTAN1	9606.ENSP00000349960	9606.ENSP00000361824	0	0	0	0	0.053	0.298	0	0.459	0.609
ACTB	ERN1	9606.ENSP00000349960	9606.ENSP00000401445	0	0	0	0	0.053	0.078	0	0.628	0.647
ACTB	TRAF6	9606.ENSP00000349960	9606.ENSP00000433623	0	0	0	0	0	0.158	0	0.616	0.662
ACTB	MAPK8	9606.ENSP00000349960	9606.ENSP00000378974	0	0	0	0	0	0	0	0.701	0.701
ACTB	CHUK	9606.ENSP00000349960	9606.ENSP00000359424	0	0	0	0	0.053	0.078	0	0.688	0.703
ACTB	SQSTM1	9606.ENSP00000349960	9606.ENSP00000374455	0	0	0	0	0	0	0	0.713	0.713
ACTB	HRAS	9606.ENSP00000349960	9606.ENSP00000407586	0	0	0	0	0	0.104	0	0.716	0.735
ACTB	PTEN	9606.ENSP00000349960	9606.ENSP00000361021	0	0	0	0	0	0	0	0.737	0.737
ACTB	ATG5	9606.ENSP00000349960	9606.ENSP00000358072	0	0	0	0	0	0.16	0	0.73	0.764
ACTB	MCL1	9606.ENSP00000349960	9606.ENSP00000358022	0	0	0	0	0	0.281	0	0.71	0.783
ACTB	CASP8	9606.ENSP00000349960	9606.ENSP00000351273	0	0	0	0	0	0.156	0	0.767	0.795
ACTB	MAP3K7	9606.ENSP00000349960	9606.ENSP00000358335	0	0	0	0	0.053	0.078	0.72	0.317	0.81
ACTB	LMNA	9606.ENSP00000349960	9606.ENSP00000357283	0	0	0	0	0.062	0.4	0	0.714	0.825
ACTB	TNF	9606.ENSP00000349960	9606.ENSP00000398698	0	0	0	0	0	0.143	0	0.857	0.872
ACTB	AKT1	9606.ENSP00000349960	9606.ENSP00000451828	0	0	0	0	0.062	0.298	0	0.906	0.933
ACTB	CASP7	9606.ENSP00000349960	9606.ENSP00000358327	0	0	0	0	0.051	0.156	0.8	0.696	0.944
ACTB	RELA	9606.ENSP00000349960	9606.ENSP00000384273	0	0	0	0	0.062	0	0.9	0.668	0.966
AKT1	MAPK1	9606.ENSP00000451828	9606.ENSP00000215832	0	0	0.304	0.592	0.068	0.148	0.8	0.795	0.895
AKT1	NFKBIA	9606.ENSP00000451828	9606.ENSP00000216797	0	0	0	0	0.062	0.33	0	0.768	0.841
AKT1	TSC2	9606.ENSP00000451828	9606.ENSP00000219476	0	0	0	0	0.062	0.516	0.9	0.94	0.996
AKT1	RPS6KB1	9606.ENSP00000451828	9606.ENSP00000225577	0	0	0.383	0.856	0.183	0.764	0.9	0.938	0.982
AKT1	CTSD	9606.ENSP00000451828	9606.ENSP00000236671	0	0	0	0	0.096	0.077	0	0.46	0.51
AKT1	RRAS	9606.ENSP00000451828	9606.ENSP00000246792	0	0	0	0	0.07	0.14	0	0.542	0.602
AKT1	TRAF2	9606.ENSP00000451828	9606.ENSP00000247668	0	0	0	0	0.063	0.099	0	0.448	0.493
AKT1	RAF1	9606.ENSP00000451828	9606.ENSP00000251849	0	0	0	0.581	0	0.88	0.9	0.914	0.992
AKT1	KRAS	9606.ENSP00000451828	9606.ENSP00000256078	0	0	0	0	0.055	0.14	0	0.861	0.877
AKT1	EIF2S1	9606.ENSP00000451828	9606.ENSP00000256383	0	0	0	0	0	0	0	0.628	0.628
AKT1	DAB2IP	9606.ENSP00000451828	9606.ENSP00000259371	0	0	0	0	0.084	0.487	0	0.391	0.689
AKT1	LMNB1	9606.ENSP00000451828	9606.ENSP00000261366	0	0	0	0	0.069	0.212	0	0.532	0.626
AKT1	PIK3C3	9606.ENSP00000451828	9606.ENSP00000262039	0	0	0	0	0.064	0.104	0	0.744	0.767
AKT1	RHEB	9606.ENSP00000451828	9606.ENSP00000262187	0	0	0	0	0.053	0.14	0.9	0.929	0.993
AKT1	PIK3R3	9606.ENSP00000451828	9606.ENSP00000262741	0	0	0	0	0.062	0.102	0.65	0.654	0.884
AKT1	RRAGB	9606.ENSP00000451828	9606.ENSP00000262850	0	0	0	0	0	0	0.9	0.49	0.946
AKT1	PIK3CA	9606.ENSP00000451828	9606.ENSP00000263967	0	0	0	0	0.064	0.88	0.9	0.903	0.998
AKT1	BCL2A1	9606.ENSP00000451828	9606.ENSP00000267953	0	0	0	0	0	0.069	0	0.504	0.518
AKT1	IGF1R	9606.ENSP00000451828	9606.ENSP00000268035	0	0	0	0.554	0.052	0.295	0	0.89	0.578
AKT1	MAP1LC3B	9606.ENSP00000451828	9606.ENSP00000268607	0	0	0	0	0	0.103	0	0.709	0.728
AKT1	TP53	9606.ENSP00000451828	9606.ENSP00000269305	0	0	0	0	0.053	0.201	0.9	0.877	0.989
AKT1	CTSK	9606.ENSP00000451828	9606.ENSP00000271651	0	0	0	0	0	0.059	0	0.483	0.493
AKT1	BAX	9606.ENSP00000451828	9606.ENSP00000293288	0	0	0	0	0.061	0.27	0	0.682	0.763
AKT1	CAPN2	9606.ENSP00000451828	9606.ENSP00000295006	0	0	0	0	0.062	0.057	0	0.381	0.404
AKT1	TSC1	9606.ENSP00000451828	9606.ENSP00000298552	0	0	0	0	0.06	0.715	0.9	0.916	0.997
AKT1	TUBA1A	9606.ENSP00000451828	9606.ENSP00000301071	0	0	0	0	0.054	0.282	0	0.208	0.416
AKT1	BIRC5	9606.ENSP00000451828	9606.ENSP00000301633	0	0	0	0	0	0.116	0	0.458	0.5
AKT1	BCL2L1	9606.ENSP00000451828	9606.ENSP00000302564	0	0	0	0	0.065	0.27	0.9	0.982	0.998
AKT1	IRS1	9606.ENSP00000451828	9606.ENSP00000304895	0	0	0	0	0.062	0.535	0	0.917	0.96
AKT1	FOS	9606.ENSP00000451828	9606.ENSP00000306245	0	0	0	0	0	0.064	0	0.704	0.711
AKT1	ITPR1	9606.ENSP00000451828	9606.ENSP00000306253	0	0	0	0	0	0.493	0	0.818	0.904
AKT1	RPTOR	9606.ENSP00000451828	9606.ENSP00000307272	0	0	0	0	0.098	0.289	0.9	0.923	0.994
AKT1	RPS6KB2	9606.ENSP00000451828	9606.ENSP00000308413	0	0	0.411	0.855	0.183	0.154	0.9	0.667	0.935
AKT1	STK11	9606.ENSP00000451828	9606.ENSP00000324856	0	0	0.325	0.631	0.104	0.298	0	0.807	0.588
AKT1	PMAIP1	9606.ENSP00000451828	9606.ENSP00000326119	0	0	0	0	0	0	0	0.6	0.6
AKT1	LMNB2	9606.ENSP00000451828	9606.ENSP00000327054	0	0	0	0	0.076	0.212	0	0.341	0.478
AKT1	ATF4	9606.ENSP00000451828	9606.ENSP00000336790	0	0	0	0	0	0	0.6	0.512	0.796
AKT1	TRADD	9606.ENSP00000451828	9606.ENSP00000341268	0	0	0	0	0.077	0.056	0	0.455	0.483
AKT1	CTSL	9606.ENSP00000451828	9606.ENSP00000345344	0	0	0	0	0	0.059	0	0.393	0.404
AKT1	HMGB1	9606.ENSP00000451828	9606.ENSP00000345347	0	0	0	0	0.065	0.058	0	0.531	0.55
AKT1	CTSB	9606.ENSP00000451828	9606.ENSP00000345672	0	0	0	0	0	0.059	0	0.467	0.477
AKT1	ATG7	9606.ENSP00000451828	9606.ENSP00000346437	0	0	0	0	0.045	0.059	0	0.717	0.723
AKT1	FAS	9606.ENSP00000451828	9606.ENSP00000347979	0	0	0	0	0	0	0	0.548	0.548
AKT1	CASP8	9606.ENSP00000451828	9606.ENSP00000351273	0	0	0	0	0	0.063	0	0.76	0.766
AKT1	LMNA	9606.ENSP00000451828	9606.ENSP00000357283	0	0	0	0	0.089	0.605	0	0.573	0.833
AKT1	MCL1	9606.ENSP00000451828	9606.ENSP00000358022	0	0	0	0	0	0	0.9	0.762	0.975
AKT1	ATG5	9606.ENSP00000451828	9606.ENSP00000358072	0	0	0	0	0.048	0.057	0	0.738	0.744
AKT1	CASP7	9606.ENSP00000451828	9606.ENSP00000358327	0	0	0	0	0	0.123	0	0.691	0.717
AKT1	RRAGD	9606.ENSP00000451828	9606.ENSP00000358423	0	0	0	0	0.062	0	0.9	0.362	0.934
AKT1	CHUK	9606.ENSP00000451828	9606.ENSP00000359424	0	0	0	0.593	0	0.872	0.9	0.898	0.991
AKT1	GADD45A	9606.ENSP00000451828	9606.ENSP00000360025	0	0	0	0	0	0	0	0.525	0.525
AKT1	PTEN	9606.ENSP00000451828	9606.ENSP00000361021	0	0	0	0	0.062	0.852	0	0.952	0.992
AKT1	RRAGC	9606.ENSP00000451828	9606.ENSP00000362092	0	0	0	0	0.062	0	0.9	0.457	0.944
AKT1	BAK1	9606.ENSP00000451828	9606.ENSP00000363591	0	0	0	0	0.085	0	0	0.5	0.524
AKT1	DAXX	9606.ENSP00000451828	9606.ENSP00000363668	0	0	0	0	0	0.057	0	0.41	0.42
AKT1	IRS2	9606.ENSP00000451828	9606.ENSP00000365016	0	0	0	0	0.062	0.132	0	0.815	0.836
AKT1	PIK3CD	9606.ENSP00000451828	9606.ENSP00000366563	0	0	0	0	0.064	0.204	0.6	0.82	0.939
AKT1	RRAGA	9606.ENSP00000451828	9606.ENSP00000369899	0	0	0	0	0	0	0.9	0.534	0.951
AKT1	SQSTM1	9606.ENSP00000451828	9606.ENSP00000374455	0	0	0	0	0	0.104	0	0.684	0.705
AKT1	AKT1S1	9606.ENSP00000451828	9606.ENSP00000375711	0	0	0	0	0.091	0.687	0.9	0.781	0.992
AKT1	BAD	9606.ENSP00000451828	9606.ENSP00000378040	0	0	0	0	0.08	0.884	0.9	0.566	0.994
AKT1	MAPK8	9606.ENSP00000451828	9606.ENSP00000378974	0	0	0.417	0.573	0.084	0.315	0	0.81	0.642
AKT1	RELA	9606.ENSP00000451828	9606.ENSP00000384273	0	0	0	0	0.086	0.056	0	0.72	0.738
AKT1	PRF1	9606.ENSP00000451828	9606.ENSP00000398568	0	0	0	0	0	0	0	0.402	0.402
AKT1	TNF	9606.ENSP00000451828	9606.ENSP00000398698	0	0	0	0	0	0.056	0	0.826	0.829
AKT1	BBC3	9606.ENSP00000451828	9606.ENSP00000404503	0	0	0	0	0.069	0	0	0.42	0.436
AKT1	HRAS	9606.ENSP00000451828	9606.ENSP00000407586	0	0	0	0	0.076	0.14	0	0.879	0.895
AKT1	LAMP2	9606.ENSP00000451828	9606.ENSP00000408411	0	0	0	0	0	0.076	0	0.513	0.531
AKT1	ATG12	9606.ENSP00000451828	9606.ENSP00000425107	0	0	0	0	0	0.056	0	0.627	0.633
AKT1	AMBRA1	9606.ENSP00000451828	9606.ENSP00000431926	0	0	0	0	0.071	0.063	0	0.391	0.424
AKT1	CAPN1	9606.ENSP00000451828	9606.ENSP00000431984	0	0	0	0	0.09	0.282	0	0.402	0.575
AKT1	ATG13	9606.ENSP00000451828	9606.ENSP00000432412	0	0	0	0	0.062	0	0	0.754	0.76
AKT1	TRAF6	9606.ENSP00000451828	9606.ENSP00000433623	0	0	0	0	0.062	0.592	0.9	0.85	0.993
AKT1	MAP3K14	9606.ENSP00000451828	9606.ENSP00000482657	0	0	0	0.588	0.065	0.076	0.9	0.264	0.915
AKT1S1	TSC2	9606.ENSP00000375711	9606.ENSP00000219476	0	0	0	0	0.062	0	0	0.811	0.815
AKT1S1	RPS6KB1	9606.ENSP00000375711	9606.ENSP00000225577	0	0	0	0	0.062	0	0.9	0.86	0.985
AKT1S1	KRAS	9606.ENSP00000375711	9606.ENSP00000256078	0	0	0	0	0.063	0	0	0.404	0.418
AKT1S1	PIK3C3	9606.ENSP00000375711	9606.ENSP00000262039	0	0	0	0	0	0.056	0	0.458	0.466
AKT1S1	RHEB	9606.ENSP00000375711	9606.ENSP00000262187	0	0	0	0	0	0	0.9	0.763	0.975
AKT1S1	RRAGB	9606.ENSP00000375711	9606.ENSP00000262850	0	0	0	0	0	0	0.9	0.566	0.954
AKT1S1	PIK3CA	9606.ENSP00000375711	9606.ENSP00000263967	0	0	0	0	0	0.056	0	0.568	0.575
AKT1S1	IGF1R	9606.ENSP00000375711	9606.ENSP00000268035	0	0	0	0	0	0.056	0	0.459	0.467
AKT1S1	TP53	9606.ENSP00000375711	9606.ENSP00000269305	0	0	0	0	0	0	0	0.457	0.457
AKT1S1	TSC1	9606.ENSP00000375711	9606.ENSP00000298552	0	0	0	0	0	0	0	0.661	0.661
AKT1S1	IRS1	9606.ENSP00000375711	9606.ENSP00000304895	0	0	0	0	0	0	0	0.613	0.613
AKT1S1	RPTOR	9606.ENSP00000375711	9606.ENSP00000307272	0	0	0	0	0.064	0.975	0.9	0.989	0.999
AKT1S1	RPS6KB2	9606.ENSP00000375711	9606.ENSP00000308413	0	0	0	0	0.063	0	0.8	0.391	0.876
AKT1S1	PRKACA	9606.ENSP00000375711	9606.ENSP00000309591	0	0	0	0	0.069	0	0.8	0	0.805
AKT1S1	ULK1	9606.ENSP00000375711	9606.ENSP00000324560	0	0	0	0	0.086	0	0.8	0.502	0.901
AKT1S1	STK11	9606.ENSP00000375711	9606.ENSP00000324856	0	0	0	0	0.077	0	0	0.506	0.524
AKT1S1	PRKAA1	9606.ENSP00000375711	9606.ENSP00000346148	0	0	0	0	0	0	0.6	0.232	0.679
AKT1S1	RRAGD	9606.ENSP00000375711	9606.ENSP00000358423	0	0	0	0	0	0	0.9	0.457	0.943
AKT1S1	PRKACB	9606.ENSP00000375711	9606.ENSP00000359719	0	0	0	0	0	0	0.8	0	0.8
AKT1S1	PTEN	9606.ENSP00000375711	9606.ENSP00000361021	0	0	0	0	0	0	0	0.636	0.636
AKT1S1	RRAGC	9606.ENSP00000375711	9606.ENSP00000362092	0	0	0	0	0	0.8	0.9	0.602	0.991
AKT1S1	IGBP1	9606.ENSP00000375711	9606.ENSP00000363661	0	0	0	0	0	0	0.8	0	0.8
AKT1S1	RRAGA	9606.ENSP00000375711	9606.ENSP00000369899	0	0	0	0	0	0.8	0.9	0.601	0.991
AKT1S1	SQSTM1	9606.ENSP00000375711	9606.ENSP00000374455	0	0	0	0	0.063	0.27	0	0.295	0.475
AKT1S1	HRAS	9606.ENSP00000375711	9606.ENSP00000407586	0	0	0	0	0.116	0	0	0.416	0.462
AKT1S1	ATG13	9606.ENSP00000375711	9606.ENSP00000432412	0	0	0	0	0	0	0	0.516	0.516
AKT1S1	ULK2	9606.ENSP00000375711	9606.ENSP00000378914	0	0	0	0	0.062	0	0.6	0.311	0.718
AMBRA1	TSC2	9606.ENSP00000431926	9606.ENSP00000219476	0	0	0	0	0.062	0	0	0.422	0.435
AMBRA1	STX17	9606.ENSP00000431926	9606.ENSP00000259400	0	0	0	0	0.053	0	0	0.501	0.507
AMBRA1	PIK3C3	9606.ENSP00000431926	9606.ENSP00000262039	0	0	0	0	0.082	0.316	0.6	0.988	0.996
AMBRA1	WIPI1	9606.ENSP00000431926	9606.ENSP00000262139	0	0	0	0	0.068	0	0	0.654	0.664
AMBRA1	VMP1	9606.ENSP00000431926	9606.ENSP00000262291	0	0	0	0	0	0	0	0.682	0.682
AMBRA1	MAP1LC3B	9606.ENSP00000431926	9606.ENSP00000268607	0	0	0	0	0.052	0.27	0	0.697	0.772
AMBRA1	ATG10	9606.ENSP00000431926	9606.ENSP00000282185	0	0	0	0	0	0	0	0.702	0.702
AMBRA1	KIAA0226	9606.ENSP00000431926	9606.ENSP00000296343	0	0	0	0	0.065	0	0	0.693	0.701
AMBRA1	BCL2L1	9606.ENSP00000431926	9606.ENSP00000302564	0	0	0	0	0.049	0	0	0.594	0.597
AMBRA1	RPTOR	9606.ENSP00000431926	9606.ENSP00000307272	0	0	0	0	0.089	0.309	0	0.408	0.595
AMBRA1	ULK1	9606.ENSP00000431926	9606.ENSP00000324560	0	0	0	0	0.062	0.675	0.9	0.71	0.989
AMBRA1	PRKAA1	9606.ENSP00000431926	9606.ENSP00000346148	0	0	0	0	0.062	0.061	0.9	0.249	0.925
AMBRA1	ATG7	9606.ENSP00000431926	9606.ENSP00000346437	0	0	0	0	0.063	0	0	0.744	0.75
AMBRA1	ATG2B	9606.ENSP00000431926	9606.ENSP00000353010	0	0	0	0	0.063	0	0	0.464	0.476
AMBRA1	MCL1	9606.ENSP00000431926	9606.ENSP00000358022	0	0	0	0	0.049	0	0	0.818	0.82
AMBRA1	ATG5	9606.ENSP00000431926	9606.ENSP00000358072	0	0	0	0	0	0	0	0.743	0.743
AMBRA1	ATG2A	9606.ENSP00000431926	9606.ENSP00000366475	0	0	0	0	0.063	0	0	0.4	0.414
AMBRA1	SQSTM1	9606.ENSP00000431926	9606.ENSP00000374455	0	0	0	0	0.051	0.055	0	0.659	0.668
AMBRA1	ULK2	9606.ENSP00000431926	9606.ENSP00000378914	0	0	0	0	0.062	0	0	0.677	0.684
AMBRA1	LAMP2	9606.ENSP00000431926	9606.ENSP00000408411	0	0	0	0	0	0	0	0.449	0.449
AMBRA1	ATG12	9606.ENSP00000431926	9606.ENSP00000425107	0	0	0	0	0	0	0	0.793	0.793
AMBRA1	SH3GLB1	9606.ENSP00000431926	9606.ENSP00000479919	0	0	0	0	0.053	0	0	0.738	0.742
AMBRA1	ATG13	9606.ENSP00000431926	9606.ENSP00000432412	0	0	0	0	0.063	0.27	0.9	0.757	0.981
AMBRA1	TRAF6	9606.ENSP00000431926	9606.ENSP00000433623	0	0	0	0	0.062	0.486	0	0.988	0.994
ATF4	MAPK1	9606.ENSP00000336790	9606.ENSP00000215832	0	0	0	0	0	0	0.6	0.143	0.642
ATF4	RPS6KB1	9606.ENSP00000336790	9606.ENSP00000225577	0	0	0	0	0	0	0	0.404	0.404
ATF4	TRAF2	9606.ENSP00000336790	9606.ENSP00000247668	0	0	0	0	0	0	0	0.404	0.404
ATF4	EIF2S1	9606.ENSP00000336790	9606.ENSP00000256383	0	0	0	0	0	0	0.9	0.847	0.984
ATF4	MAP1LC3B	9606.ENSP00000336790	9606.ENSP00000268607	0	0	0	0	0	0	0	0.463	0.463
ATF4	TP53	9606.ENSP00000336790	9606.ENSP00000269305	0	0	0	0	0	0	0	0.431	0.431
ATF4	FOS	9606.ENSP00000336790	9606.ENSP00000306245	0	0	0	0	0.062	0.837	0	0.396	0.899
ATF4	PRKACA	9606.ENSP00000336790	9606.ENSP00000309591	0	0	0	0	0	0	0.8	0	0.8
ATF4	SQSTM1	9606.ENSP00000336790	9606.ENSP00000374455	0	0	0	0	0.062	0	0	0.39	0.403
ATF4	ATG5	9606.ENSP00000336790	9606.ENSP00000358072	0	0	0	0	0	0	0	0.419	0.419
ATF4	DAPK3	9606.ENSP00000336790	9606.ENSP00000442973	0	0	0	0	0	0.603	0	0.155	0.651
ATF4	PRKACB	9606.ENSP00000336790	9606.ENSP00000359719	0	0	0	0	0	0	0.8	0	0.8
ATF4	ERN1	9606.ENSP00000336790	9606.ENSP00000401445	0	0	0	0	0	0	0	0.813	0.813
ATG10	TSC2	9606.ENSP00000282185	9606.ENSP00000219476	0	0	0	0	0	0	0	0.418	0.418
ATG10	STX17	9606.ENSP00000282185	9606.ENSP00000259400	0	0	0	0	0.062	0	0	0.526	0.536
ATG10	PIK3C3	9606.ENSP00000282185	9606.ENSP00000262039	0	0	0	0	0	0	0	0.906	0.906
ATG10	WIPI1	9606.ENSP00000282185	9606.ENSP00000262139	0	0	0	0	0	0	0	0.83	0.83
ATG10	VMP1	9606.ENSP00000282185	9606.ENSP00000262291	0	0	0	0	0	0	0	0.589	0.589
ATG10	MAP1LC3B	9606.ENSP00000282185	9606.ENSP00000268607	0	0	0	0	0	0.18	0.65	0.721	0.913
ATG10	KIAA0226	9606.ENSP00000282185	9606.ENSP00000296343	0	0	0	0	0	0	0	0.482	0.482
ATG10	LAMP2	9606.ENSP00000282185	9606.ENSP00000408411	0	0	0	0	0	0.059	0	0.522	0.531
ATG10	SH3GLB1	9606.ENSP00000282185	9606.ENSP00000479919	0	0	0	0	0.062	0	0	0.566	0.575
ATG10	SQSTM1	9606.ENSP00000282185	9606.ENSP00000374455	0	0	0	0	0	0	0	0.711	0.711
ATG10	ULK2	9606.ENSP00000282185	9606.ENSP00000378914	0	0	0	0	0	0	0	0.714	0.714
ATG10	ATG2A	9606.ENSP00000282185	9606.ENSP00000366475	0	0	0	0	0	0	0	0.755	0.755
ATG10	ATG2B	9606.ENSP00000282185	9606.ENSP00000353010	0	0	0	0	0	0	0	0.777	0.777
ATG10	ULK1	9606.ENSP00000282185	9606.ENSP00000324560	0	0	0	0	0	0	0	0.797	0.797
ATG10	ATG13	9606.ENSP00000282185	9606.ENSP00000432412	0	0	0	0	0	0	0	0.921	0.921
ATG10	ATG5	9606.ENSP00000282185	9606.ENSP00000358072	0	0	0	0	0	0.432	0.6	0.994	0.998
ATG10	ATG12	9606.ENSP00000282185	9606.ENSP00000425107	0	0	0	0	0.062	0.683	0.8	0.994	0.999
ATG10	ATG7	9606.ENSP00000282185	9606.ENSP00000346437	0	0	0	0	0	0.789	0.6	0.994	0.999
ATG12	SNAP29	9606.ENSP00000425107	9606.ENSP00000215730	0	0	0	0	0.062	0	0	0.543	0.553
ATG12	TSC2	9606.ENSP00000425107	9606.ENSP00000219476	0	0	0	0	0	0	0	0.64	0.64
ATG12	RPS6KB1	9606.ENSP00000425107	9606.ENSP00000225577	0	0	0	0	0.064	0	0	0.54	0.551
ATG12	CTSD	9606.ENSP00000425107	9606.ENSP00000236671	0	0	0	0	0	0	0	0.482	0.482
ATG12	EIF2S1	9606.ENSP00000425107	9606.ENSP00000256383	0	0	0	0	0	0	0	0.448	0.448
ATG12	STX17	9606.ENSP00000425107	9606.ENSP00000259400	0	0	0	0	0	0	0	0.702	0.702
ATG12	PIK3C3	9606.ENSP00000425107	9606.ENSP00000262039	0	0	0	0	0.062	0.101	0.65	0.944	0.981
ATG12	WIPI1	9606.ENSP00000425107	9606.ENSP00000262139	0	0	0	0	0	0.46	0	0.943	0.968
ATG12	RHEB	9606.ENSP00000425107	9606.ENSP00000262187	0	0	0	0	0.062	0.061	0	0.553	0.572
ATG12	VMP1	9606.ENSP00000425107	9606.ENSP00000262291	0	0	0	0	0.062	0	0	0.786	0.791
ATG12	MAP1LC3B	9606.ENSP00000425107	9606.ENSP00000268607	0	0	0	0	0.062	0.384	0.6	0.931	0.982
ATG12	TP53	9606.ENSP00000425107	9606.ENSP00000269305	0	0	0	0	0	0	0	0.503	0.503
ATG12	KIAA0226	9606.ENSP00000425107	9606.ENSP00000296343	0	0	0	0	0	0	0	0.528	0.528
ATG12	BIRC5	9606.ENSP00000425107	9606.ENSP00000301633	0	0	0	0	0.078	0.082	0	0.451	0.495
ATG12	BCL2L1	9606.ENSP00000425107	9606.ENSP00000302564	0	0	0	0	0	0	0	0.53	0.53
ATG12	RPTOR	9606.ENSP00000425107	9606.ENSP00000307272	0	0	0	0	0	0	0	0.602	0.602
ATG12	ULK1	9606.ENSP00000425107	9606.ENSP00000324560	0	0	0	0	0.054	0.183	0	0.93	0.941
ATG12	CTSB	9606.ENSP00000425107	9606.ENSP00000345672	0	0	0	0	0	0	0	0.439	0.439
ATG12	ATG7	9606.ENSP00000425107	9606.ENSP00000346437	0	0	0	0	0.063	0.941	0.8	0.995	0.999
ATG12	CASP8	9606.ENSP00000425107	9606.ENSP00000351273	0	0	0	0	0	0.061	0	0.603	0.612
ATG12	ATG2B	9606.ENSP00000425107	9606.ENSP00000353010	0	0	0	0	0	0	0	0.804	0.804
ATG12	MCL1	9606.ENSP00000425107	9606.ENSP00000358022	0	0	0	0	0	0.27	0	0.954	0.965
ATG12	ATG5	9606.ENSP00000425107	9606.ENSP00000358072	0	0	0	0	0.063	0.995	0.8	0.996	0.999
ATG12	PTEN	9606.ENSP00000425107	9606.ENSP00000361021	0	0	0	0	0.062	0.076	0	0.434	0.466
ATG12	ATG2A	9606.ENSP00000425107	9606.ENSP00000366475	0	0	0	0	0	0	0	0.767	0.767
ATG12	SQSTM1	9606.ENSP00000425107	9606.ENSP00000374455	0	0	0	0	0.049	0.061	0.6	0.881	0.952
ATG12	ULK2	9606.ENSP00000425107	9606.ENSP00000378914	0	0	0	0	0.062	0.183	0	0.82	0.85
ATG12	MAPK8	9606.ENSP00000425107	9606.ENSP00000378974	0	0	0	0	0	0	0	0.458	0.458
ATG12	ERN1	9606.ENSP00000425107	9606.ENSP00000401445	0	0	0	0	0.062	0.056	0	0.47	0.49
ATG12	LAMP2	9606.ENSP00000425107	9606.ENSP00000408411	0	0	0	0	0.062	0.045	0	0.651	0.66
ATG12	TRAF6	9606.ENSP00000425107	9606.ENSP00000433623	0	0	0	0	0	0.056	0	0.485	0.493
ATG12	SH3GLB1	9606.ENSP00000425107	9606.ENSP00000479919	0	0	0	0	0.062	0.063	0	0.529	0.549
ATG12	ATG13	9606.ENSP00000425107	9606.ENSP00000432412	0	0	0	0	0.062	0.061	0	0.926	0.929
ATG13	SNAP29	9606.ENSP00000432412	9606.ENSP00000215730	0	0	0	0	0	0	0	0.497	0.497
ATG13	TSC2	9606.ENSP00000432412	9606.ENSP00000219476	0	0	0	0	0.065	0	0	0.692	0.699
ATG13	RPS6KB1	9606.ENSP00000432412	9606.ENSP00000225577	0	0	0	0	0	0	0	0.639	0.639
ATG13	EIF2S1	9606.ENSP00000432412	9606.ENSP00000256383	0	0	0	0	0	0	0	0.403	0.403
ATG13	STX17	9606.ENSP00000432412	9606.ENSP00000259400	0	0	0	0	0.063	0	0	0.659	0.667
ATG13	PIK3C3	9606.ENSP00000432412	9606.ENSP00000262039	0	0	0	0	0	0.27	0.9	0.939	0.995
ATG13	WIPI1	9606.ENSP00000432412	9606.ENSP00000262139	0	0	0	0	0.076	0	0	0.863	0.868
ATG13	RHEB	9606.ENSP00000432412	9606.ENSP00000262187	0	0	0	0	0.062	0	0.6	0.713	0.883
ATG13	VMP1	9606.ENSP00000432412	9606.ENSP00000262291	0	0	0	0	0	0	0	0.556	0.556
ATG13	RRAGB	9606.ENSP00000432412	9606.ENSP00000262850	0	0	0	0	0	0	0.6	0.429	0.762
ATG13	MAP1LC3B	9606.ENSP00000432412	9606.ENSP00000268607	0	0	0	0	0.063	0.746	0	0.75	0.935
ATG13	NRBF2	9606.ENSP00000432412	9606.ENSP00000277746	0	0	0	0	0	0	0	0.401	0.4
ATG13	KIAA0226	9606.ENSP00000432412	9606.ENSP00000296343	0	0	0	0	0	0	0	0.549	0.549
ATG13	WDR41	9606.ENSP00000432412	9606.ENSP00000296679	0	0	0	0	0	0	0	0.483	0.483
ATG13	TSC1	9606.ENSP00000432412	9606.ENSP00000298552	0	0	0	0	0.062	0	0	0.495	0.507
ATG13	BCL2L1	9606.ENSP00000432412	9606.ENSP00000302564	0	0	0	0	0	0	0	0.423	0.423
ATG13	RPTOR	9606.ENSP00000432412	9606.ENSP00000307272	0	0	0	0	0	0.487	0.9	0.755	0.986
ATG13	ULK1	9606.ENSP00000432412	9606.ENSP00000324560	0	0	0	0	0.062	0.962	0.9	0.994	0.999
ATG13	STK11	9606.ENSP00000432412	9606.ENSP00000324856	0	0	0	0	0.062	0	0	0.527	0.538
ATG13	PRKAA1	9606.ENSP00000432412	9606.ENSP00000346148	0	0	0	0	0	0	0.6	0.238	0.682
ATG13	ATG7	9606.ENSP00000432412	9606.ENSP00000346437	0	0	0	0	0.063	0	0	0.941	0.943
ATG13	ATG2B	9606.ENSP00000432412	9606.ENSP00000353010	0	0	0	0	0.062	0	0	0.738	0.744
ATG13	ATG5	9606.ENSP00000432412	9606.ENSP00000358072	0	0	0	0	0	0.305	0	0.927	0.947
ATG13	RRAGD	9606.ENSP00000432412	9606.ENSP00000358423	0	0	0	0	0	0	0.6	0.355	0.731
ATG13	PTEN	9606.ENSP00000432412	9606.ENSP00000361021	0	0	0	0	0	0	0	0.434	0.434
ATG13	RRAGC	9606.ENSP00000432412	9606.ENSP00000362092	0	0	0	0	0	0	0.6	0.42	0.758
ATG13	ATG2A	9606.ENSP00000432412	9606.ENSP00000366475	0	0	0	0	0.062	0	0	0.761	0.766
ATG13	RRAGA	9606.ENSP00000432412	9606.ENSP00000369899	0	0	0	0	0	0	0.6	0.445	0.768
ATG13	SQSTM1	9606.ENSP00000432412	9606.ENSP00000374455	0	0	0	0	0	0.187	0	0.768	0.803
ATG13	ULK2	9606.ENSP00000432412	9606.ENSP00000378914	0	0	0	0	0.062	0.776	0.9	0.994	0.999
ATG13	LAMP2	9606.ENSP00000432412	9606.ENSP00000408411	0	0	0	0	0	0	0	0.57	0.57
ATG13	SH3GLB1	9606.ENSP00000432412	9606.ENSP00000479919	0	0	0	0	0	0	0	0.503	0.503
ATG2A	PIK3C3	9606.ENSP00000366475	9606.ENSP00000262039	0	0	0	0	0.108	0	0	0.768	0.784
ATG2A	WIPI1	9606.ENSP00000366475	9606.ENSP00000262139	0	0	0	0	0.112	0.637	0.8	0.921	0.994
ATG2A	VMP1	9606.ENSP00000366475	9606.ENSP00000262291	0	0	0	0	0.046	0	0	0.51	0.513
ATG2A	MAP1LC3B	9606.ENSP00000366475	9606.ENSP00000268607	0	0	0	0	0.067	0.077	0	0.483	0.516
ATG2A	ULK1	9606.ENSP00000366475	9606.ENSP00000324560	0	0	0	0	0.173	0.103	0.8	0.676	0.945
ATG2A	ATG7	9606.ENSP00000366475	9606.ENSP00000346437	0	0	0	0	0.066	0	0	0.766	0.772
ATG2A	ATG2B	9606.ENSP00000366475	9606.ENSP00000353010	0	0	0	0.909	0	0.275	0.8	0.861	0.86
ATG2A	LMNA	9606.ENSP00000366475	9606.ENSP00000357283	0	0	0	0	0	0	0	0.461	0.461
ATG2A	ATG5	9606.ENSP00000366475	9606.ENSP00000358072	0	0	0	0	0.042	0	0	0.772	0.772
ATG2A	SQSTM1	9606.ENSP00000366475	9606.ENSP00000374455	0	0	0	0	0.078	0	0	0.485	0.505
ATG2A	ULK2	9606.ENSP00000366475	9606.ENSP00000378914	0	0	0	0	0.141	0.103	0.8	0.676	0.943
ATG2B	PIK3C3	9606.ENSP00000353010	9606.ENSP00000262039	0	0	0	0	0.108	0	0	0.708	0.729
ATG2B	WIPI1	9606.ENSP00000353010	9606.ENSP00000262139	0	0	0	0	0.112	0.629	0.8	0.819	0.986
ATG2B	VMP1	9606.ENSP00000353010	9606.ENSP00000262291	0	0	0	0	0	0	0	0.478	0.478
ATG2B	MAP1LC3B	9606.ENSP00000353010	9606.ENSP00000268607	0	0	0	0	0.064	0	0	0.469	0.481
ATG2B	ULK1	9606.ENSP00000353010	9606.ENSP00000324560	0	0	0	0	0.141	0.103	0.8	0.639	0.937
ATG2B	ATG7	9606.ENSP00000353010	9606.ENSP00000346437	0	0	0	0	0.066	0	0	0.766	0.772
ATG2B	SQSTM1	9606.ENSP00000353010	9606.ENSP00000374455	0	0	0	0	0.078	0	0	0.501	0.52
ATG2B	SH3GLB1	9606.ENSP00000353010	9606.ENSP00000479919	0	0	0	0	0	0	0	0.625	0.625
ATG2B	ATG5	9606.ENSP00000353010	9606.ENSP00000358072	0	0	0	0	0	0	0	0.816	0.816
ATG2B	ULK2	9606.ENSP00000353010	9606.ENSP00000378914	0	0	0	0	0.141	0.103	0.8	0.672	0.942
ATG5	SNAP29	9606.ENSP00000358072	9606.ENSP00000215730	0	0	0	0	0.065	0	0	0.574	0.585
ATG5	TSC2	9606.ENSP00000358072	9606.ENSP00000219476	0	0	0	0	0	0	0	0.684	0.684
ATG5	RPS6KB1	9606.ENSP00000358072	9606.ENSP00000225577	0	0	0	0	0.084	0	0	0.69	0.704
ATG5	CTSD	9606.ENSP00000358072	9606.ENSP00000236671	0	0	0	0	0	0	0	0.628	0.628
ATG5	KRAS	9606.ENSP00000358072	9606.ENSP00000256078	0	0	0	0	0.065	0	0	0.441	0.455
ATG5	EIF2S1	9606.ENSP00000358072	9606.ENSP00000256383	0	0	0	0	0.083	0	0	0.586	0.604
ATG5	STX17	9606.ENSP00000358072	9606.ENSP00000259400	0	0	0	0	0.062	0	0	0.745	0.751
ATG5	RIPK1	9606.ENSP00000358072	9606.ENSP00000259808	0	0	0	0	0	0.345	0	0.58	0.714
ATG5	PIK3C3	9606.ENSP00000358072	9606.ENSP00000262039	0	0	0	0	0.062	0.347	0.65	0.946	0.986
ATG5	WIPI1	9606.ENSP00000358072	9606.ENSP00000262139	0	0	0	0	0.064	0.246	0	0.919	0.938
ATG5	RHEB	9606.ENSP00000358072	9606.ENSP00000262187	0	0	0	0	0.048	0	0	0.638	0.641
ATG5	VMP1	9606.ENSP00000358072	9606.ENSP00000262291	0	0	0	0	0.062	0	0	0.718	0.725
ATG5	MAP1LC3B	9606.ENSP00000358072	9606.ENSP00000268607	0	0	0	0	0.049	0.392	0.6	0.922	0.979
ATG5	TP53	9606.ENSP00000358072	9606.ENSP00000269305	0	0	0	0	0	0	0	0.762	0.762
ATG5	CAPN2	9606.ENSP00000358072	9606.ENSP00000295006	0	0	0	0	0	0.27	0	0.299	0.466
ATG5	KIAA0226	9606.ENSP00000358072	9606.ENSP00000296343	0	0	0	0	0	0	0	0.568	0.568
ATG5	BIRC5	9606.ENSP00000358072	9606.ENSP00000301633	0	0	0	0	0	0.27	0	0.679	0.756
ATG5	BCL2L1	9606.ENSP00000358072	9606.ENSP00000302564	0	0	0	0	0.055	0.27	0	0.989	0.992
ATG5	RPTOR	9606.ENSP00000358072	9606.ENSP00000307272	0	0	0	0	0	0	0	0.628	0.628
ATG5	ULK1	9606.ENSP00000358072	9606.ENSP00000324560	0	0	0	0	0.052	0.354	0	0.94	0.96
ATG5	STK11	9606.ENSP00000358072	9606.ENSP00000324856	0	0	0	0	0	0	0	0.497	0.497
ATG5	PMAIP1	9606.ENSP00000358072	9606.ENSP00000326119	0	0	0	0	0	0	0	0.423	0.422
ATG5	CTSL	9606.ENSP00000358072	9606.ENSP00000345344	0	0	0	0	0	0	0	0.436	0.436
ATG5	HMGB1	9606.ENSP00000358072	9606.ENSP00000345347	0	0	0	0	0	0	0	0.43	0.43
ATG5	CTSB	9606.ENSP00000358072	9606.ENSP00000345672	0	0	0	0	0.054	0	0	0.567	0.572
ATG5	ATG7	9606.ENSP00000358072	9606.ENSP00000346437	0	0	0	0	0.093	0.577	0.8	0.985	0.998
ATG5	FAS	9606.ENSP00000358072	9606.ENSP00000347979	0	0	0	0	0	0.486	0	0.469	0.715
ATG5	CASP8	9606.ENSP00000358072	9606.ENSP00000351273	0	0	0	0	0.054	0.372	0	0.945	0.965
ATG5	MCL1	9606.ENSP00000358072	9606.ENSP00000358022	0	0	0	0	0	0	0	0.521	0.521
ATG5	RAB1A	9606.ENSP00000358072	9606.ENSP00000387286	0	0	0	0	0	0.161	0	0.367	0.446
ATG5	HRAS	9606.ENSP00000358072	9606.ENSP00000407586	0	0	0	0	0.063	0	0	0.453	0.466
ATG5	CAPN1	9606.ENSP00000358072	9606.ENSP00000431984	0	0	0	0	0	0.27	0	0.37	0.52
ATG5	TNF	9606.ENSP00000358072	9606.ENSP00000398698	0	0	0	0	0	0	0	0.521	0.521
ATG5	TRAF6	9606.ENSP00000358072	9606.ENSP00000433623	0	0	0	0	0.053	0	0	0.545	0.55
ATG5	ERN1	9606.ENSP00000358072	9606.ENSP00000401445	0	0	0	0	0	0.057	0	0.569	0.576
ATG5	CASP7	9606.ENSP00000358072	9606.ENSP00000358327	0	0	0	0	0.062	0.159	0	0.525	0.593
ATG5	PTEN	9606.ENSP00000358072	9606.ENSP00000361021	0	0	0	0	0.063	0	0	0.591	0.6
ATG5	MAPK8	9606.ENSP00000358072	9606.ENSP00000378974	0	0	0	0	0.08	0	0	0.59	0.607
ATG5	SH3GLB1	9606.ENSP00000358072	9606.ENSP00000479919	0	0	0	0	0.065	0.105	0	0.609	0.644
ATG5	LAMP2	9606.ENSP00000358072	9606.ENSP00000408411	0	0	0	0	0.062	0	0	0.731	0.737
ATG5	ULK2	9606.ENSP00000358072	9606.ENSP00000378914	0	0	0	0	0.052	0.109	0	0.849	0.861
ATG5	SQSTM1	9606.ENSP00000358072	9606.ENSP00000374455	0	0	0	0	0.052	0.27	0.6	0.92	0.974
ATG7	SNAP29	9606.ENSP00000346437	9606.ENSP00000215730	0	0	0	0	0.062	0	0	0.6	0.609
ATG7	MAPK1	9606.ENSP00000346437	9606.ENSP00000215832	0	0	0	0	0.065	0.057	0.6	0.27	0.708
ATG7	TSC2	9606.ENSP00000346437	9606.ENSP00000219476	0	0	0	0	0.076	0	0	0.654	0.666
ATG7	RPS6KB1	9606.ENSP00000346437	9606.ENSP00000225577	0	0	0	0	0.063	0	0	0.66	0.667
ATG7	CTSD	9606.ENSP00000346437	9606.ENSP00000236671	0	0	0	0	0.065	0	0	0.626	0.636
ATG7	RAF1	9606.ENSP00000346437	9606.ENSP00000251849	0	0	0	0	0.067	0.059	0.9	0.134	0.913
ATG7	KRAS	9606.ENSP00000346437	9606.ENSP00000256078	0	0	0	0	0.062	0.076	0	0.431	0.464
ATG7	EIF2S1	9606.ENSP00000346437	9606.ENSP00000256383	0	0	0	0	0.062	0	0	0.507	0.517
ATG7	STX17	9606.ENSP00000346437	9606.ENSP00000259400	0	0	0	0	0.083	0.112	0	0.664	0.703
ATG7	RIPK1	9606.ENSP00000346437	9606.ENSP00000259808	0	0	0	0	0.062	0.162	0	0.405	0.491
ATG7	PIK3C3	9606.ENSP00000346437	9606.ENSP00000262039	0	0	0	0	0.162	0.067	0	0.935	0.944
ATG7	WIPI1	9606.ENSP00000346437	9606.ENSP00000262139	0	0	0	0	0.213	0.244	0	0.894	0.931
ATG7	RHEB	9606.ENSP00000346437	9606.ENSP00000262187	0	0	0	0	0.062	0.076	0	0.616	0.638
ATG7	VMP1	9606.ENSP00000346437	9606.ENSP00000262291	0	0	0	0	0	0	0	0.673	0.673
ATG7	MAP1LC3B	9606.ENSP00000346437	9606.ENSP00000268607	0	0	0	0	0.066	0.942	0.6	0.976	0.999
ATG7	TP53	9606.ENSP00000346437	9606.ENSP00000269305	0	0	0	0	0	0.27	0	0.963	0.972
ATG7	KIAA0226	9606.ENSP00000346437	9606.ENSP00000296343	0	0	0	0	0.062	0	0	0.564	0.573
ATG7	BCL2L1	9606.ENSP00000346437	9606.ENSP00000302564	0	0	0	0	0	0.061	0	0.568	0.577
ATG7	RPTOR	9606.ENSP00000346437	9606.ENSP00000307272	0	0	0	0	0.069	0.069	0	0.714	0.73
ATG7	ULK1	9606.ENSP00000346437	9606.ENSP00000324560	0	0	0	0	0.065	0.248	0	0.922	0.94
ATG7	STK11	9606.ENSP00000346437	9606.ENSP00000324856	0	0.001	0	0	0.064	0.057	0	0.48	0.501
ATG7	CTSL	9606.ENSP00000346437	9606.ENSP00000345344	0	0	0	0	0.062	0.056	0	0.435	0.456
ATG7	HMGB1	9606.ENSP00000346437	9606.ENSP00000345347	0	0	0	0	0.062	0.057	0	0.39	0.413
ATG7	CTSB	9606.ENSP00000346437	9606.ENSP00000345672	0	0	0	0	0.062	0.056	0	0.536	0.554
ATG7	PRKAA1	9606.ENSP00000346437	9606.ENSP00000346148	0	0	0	0	0.112	0.057	0	0.47	0.517
ATG7	MCL1	9606.ENSP00000346437	9606.ENSP00000358022	0	0	0	0	0	0.061	0	0.414	0.426
ATG7	TP53INP2	9606.ENSP00000346437	9606.ENSP00000363943	0	0	0	0	0	0	0	0.441	0.441
ATG7	HRAS	9606.ENSP00000346437	9606.ENSP00000407586	0	0	0	0	0.062	0.076	0	0.43	0.462
ATG7	TNF	9606.ENSP00000346437	9606.ENSP00000398698	0	0	0	0	0	0	0	0.474	0.474
ATG7	TRAF6	9606.ENSP00000346437	9606.ENSP00000433623	0	0	0	0	0	0	0	0.484	0.484
ATG7	CASP7	9606.ENSP00000346437	9606.ENSP00000358327	0	0	0	0	0.062	0.142	0	0.436	0.506
ATG7	SH3GLB1	9606.ENSP00000346437	9606.ENSP00000479919	0	0	0	0	0	0.056	0	0.504	0.511
ATG7	CASP8	9606.ENSP00000346437	9606.ENSP00000351273	0	0	0	0	0.062	0.065	0	0.528	0.55
ATG7	MAPK8	9606.ENSP00000346437	9606.ENSP00000378974	0	0	0	0	0.072	0	0	0.541	0.556
ATG7	ERN1	9606.ENSP00000346437	9606.ENSP00000401445	0	0	0	0	0.064	0.145	0	0.515	0.578
ATG7	PTEN	9606.ENSP00000346437	9606.ENSP00000361021	0	0	0	0	0.066	0	0	0.618	0.628
ATG7	LMNA	9606.ENSP00000346437	9606.ENSP00000357283	0	0	0	0	0.062	0	0.6	0.212	0.678
ATG7	LAMP2	9606.ENSP00000346437	9606.ENSP00000408411	0	0	0	0	0.049	0	0	0.73	0.732
ATG7	ULK2	9606.ENSP00000346437	9606.ENSP00000378914	0	0	0	0	0.065	0.248	0	0.848	0.884
ATG7	SQSTM1	9606.ENSP00000346437	9606.ENSP00000374455	0	0	0	0	0	0.27	0	0.91	0.931
BAD	MAPK1	9606.ENSP00000378040	9606.ENSP00000215832	0	0	0	0	0.062	0	0.9	0.169	0.915
BAD	RAF1	9606.ENSP00000378040	9606.ENSP00000251849	0	0	0	0	0	0.876	0.9	0.259	0.99
BAD	BCL2A1	9606.ENSP00000378040	9606.ENSP00000267953	0	0	0	0	0	0.893	0	0.294	0.921
BAD	TP53	9606.ENSP00000378040	9606.ENSP00000269305	0	0	0	0	0	0	0	0.64	0.64
BAD	BAX	9606.ENSP00000378040	9606.ENSP00000293288	0	0	0	0	0	0.535	0	0.681	0.845
BAD	BCL2L1	9606.ENSP00000378040	9606.ENSP00000302564	0	0	0	0	0.065	0.932	0.9	0.927	0.999
BAD	PRKACA	9606.ENSP00000378040	9606.ENSP00000309591	0	0	0	0	0	0.729	0.9	0.232	0.977
BAD	BID	9606.ENSP00000378040	9606.ENSP00000318822	0	0	0	0	0	0	0.65	0.661	0.876
BAD	ULK1	9606.ENSP00000378040	9606.ENSP00000324560	0	0	0	0	0	0.27	0	0.262	0.438
BAD	PMAIP1	9606.ENSP00000378040	9606.ENSP00000326119	0	0	0	0	0	0	0	0.466	0.465
BAD	CASP8	9606.ENSP00000378040	9606.ENSP00000351273	0	0	0	0	0.052	0	0	0.473	0.479
BAD	MCL1	9606.ENSP00000378040	9606.ENSP00000358022	0	0	0	0	0	0.893	0	0.47	0.941
BAD	PRKACB	9606.ENSP00000378040	9606.ENSP00000359719	0	0	0	0	0	0.187	0.9	0.091	0.919
BAD	BAK1	9606.ENSP00000378040	9606.ENSP00000363591	0	0	0	0	0	0.233	0	0.517	0.613
BAD	DAPK3	9606.ENSP00000378040	9606.ENSP00000442973	0	0	0	0	0.097	0	0	0.472	0.503
BAD	BBC3	9606.ENSP00000378040	9606.ENSP00000404503	0	0	0	0	0	0	0	0.518	0.518
BAD	MAPK8	9606.ENSP00000378040	9606.ENSP00000378974	0	0	0	0	0	0.682	0.9	0.244	0.973
BAK1	BCL2A1	9606.ENSP00000363591	9606.ENSP00000267953	0	0	0	0	0	0.928	0	0.52	0.964
BAK1	TP53	9606.ENSP00000363591	9606.ENSP00000269305	0	0	0	0	0.062	0.842	0.9	0.833	0.997
BAK1	BAX	9606.ENSP00000363591	9606.ENSP00000293288	0	0	0	0.654	0.088	0.753	0.9	0.732	0.981
BAK1	CAPN2	9606.ENSP00000363591	9606.ENSP00000295006	0	0	0	0	0.062	0	0.8	0.149	0.826
BAK1	BCL2L1	9606.ENSP00000363591	9606.ENSP00000302564	0	0	0	0.689	0.096	0.982	0.9	0.848	0.998
BAK1	BID	9606.ENSP00000363591	9606.ENSP00000318822	0	0	0	0	0.062	0.853	0.9	0.602	0.993
BAK1	PMAIP1	9606.ENSP00000363591	9606.ENSP00000326119	0	0	0	0	0.069	0.145	0	0.564	0.622
BAK1	TRADD	9606.ENSP00000363591	9606.ENSP00000341268	0	0	0	0	0.214	0	0	0.305	0.43
BAK1	CASP8	9606.ENSP00000363591	9606.ENSP00000351273	0	0	0	0	0.062	0.178	0	0.603	0.667
BAK1	MCL1	9606.ENSP00000363591	9606.ENSP00000358022	0	0	0	0.641	0.072	0.924	0.9	0.744	0.994
BAK1	CASP7	9606.ENSP00000363591	9606.ENSP00000358327	0	0	0	0	0.074	0.178	0	0.433	0.531
BAK1	MAPK8	9606.ENSP00000363591	9606.ENSP00000378974	0	0	0	0	0.069	0.281	0	0.243	0.449
BAK1	ERN1	9606.ENSP00000363591	9606.ENSP00000401445	0	0	0	0	0.062	0.226	0	0.307	0.453
BAK1	BBC3	9606.ENSP00000363591	9606.ENSP00000404503	0	0	0	0	0.077	0	0	0.608	0.622
BAK1	CAPN1	9606.ENSP00000363591	9606.ENSP00000431984	0	0	0	0	0.085	0	0.8	0.237	0.848
BAX	BCL2A1	9606.ENSP00000293288	9606.ENSP00000267953	0	0	0	0	0	0.27	0	0.369	0.519
BAX	TP53	9606.ENSP00000293288	9606.ENSP00000269305	0	0	0	0	0.051	0.738	0.9	0.681	0.991
BAX	TRADD	9606.ENSP00000293288	9606.ENSP00000341268	0	0	0	0	0.121	0	0	0.361	0.414
BAX	PTEN	9606.ENSP00000293288	9606.ENSP00000361021	0	0	0	0	0	0.076	0	0.401	0.422
BAX	FAS	9606.ENSP00000293288	9606.ENSP00000347979	0	0	0	0	0	0	0	0.452	0.452
BAX	TNF	9606.ENSP00000293288	9606.ENSP00000398698	0	0	0	0	0	0.059	0	0.457	0.467
BAX	ERN1	9606.ENSP00000293288	9606.ENSP00000401445	0	0	0	0	0	0.282	0	0.501	0.627
BAX	CASP7	9606.ENSP00000293288	9606.ENSP00000358327	0	0	0	0	0	0.374	0	0.484	0.663
BAX	SH3GLB1	9606.ENSP00000293288	9606.ENSP00000479919	0	0	0	0	0	0.677	0	0.142	0.711
BAX	PMAIP1	9606.ENSP00000293288	9606.ENSP00000326119	0	0	0	0	0	0.349	0	0.603	0.73
BAX	BBC3	9606.ENSP00000293288	9606.ENSP00000404503	0	0	0	0	0.088	0.213	0	0.666	0.739
BAX	CASP8	9606.ENSP00000293288	9606.ENSP00000351273	0	0	0	0	0	0.374	0	0.688	0.796
BAX	PRKACB	9606.ENSP00000293288	9606.ENSP00000359719	0	0	0	0	0	0	0.8	0	0.8
BAX	PRKACA	9606.ENSP00000293288	9606.ENSP00000309591	0	0	0	0	0.045	0	0.8	0	0.8
BAX	CAPN2	9606.ENSP00000293288	9606.ENSP00000295006	0	0	0	0	0	0	0.8	0.122	0.816
BAX	CAPN1	9606.ENSP00000293288	9606.ENSP00000431984	0	0	0	0	0	0	0.8	0.181	0.829
BAX	MAPK8	9606.ENSP00000293288	9606.ENSP00000378974	0	0	0	0	0	0.281	0.9	0.394	0.952
BAX	BCL2L1	9606.ENSP00000293288	9606.ENSP00000302564	0	0	0	0.643	0.047	0.913	0.9	0.709	0.993
BAX	BID	9606.ENSP00000293288	9606.ENSP00000318822	0	0	0	0	0	0.901	0.9	0.857	0.998
BAX	MCL1	9606.ENSP00000293288	9606.ENSP00000358022	0	0	0	0.62	0	0.978	0.9	0.63	0.998
BBC3	BCL2A1	9606.ENSP00000404503	9606.ENSP00000267953	0	0	0	0	0	0.696	0.9	0.468	0.982
BBC3	TP53	9606.ENSP00000404503	9606.ENSP00000269305	0	0	0	0	0	0.494	0.9	0.71	0.984
BBC3	BCL2L1	9606.ENSP00000404503	9606.ENSP00000302564	0	0	0	0	0.065	0.894	0.9	0.872	0.998
BBC3	BID	9606.ENSP00000404503	9606.ENSP00000318822	0	0	0	0	0	0	0.8	0.616	0.919
BBC3	PMAIP1	9606.ENSP00000404503	9606.ENSP00000326119	0	0	0	0	0	0	0.8	0.759	0.949
BBC3	CASP8	9606.ENSP00000404503	9606.ENSP00000351273	0	0	0	0	0	0	0	0.501	0.501
BBC3	MCL1	9606.ENSP00000404503	9606.ENSP00000358022	0	0	0	0	0	0.879	0.9	0.827	0.997
BBC3	GADD45A	9606.ENSP00000404503	9606.ENSP00000360025	0	0	0	0	0.065	0	0	0.561	0.571
BBC3	PTEN	9606.ENSP00000404503	9606.ENSP00000361021	0	0	0	0	0	0	0	0.414	0.414
BCL2A1	NFKBIA	9606.ENSP00000267953	9606.ENSP00000216797	0	0	0	0	0.118	0.056	0	0.478	0.528
BCL2A1	TRADD	9606.ENSP00000267953	9606.ENSP00000341268	0	0	0	0	0.088	0	0	0.374	0.404
BCL2A1	TUBA1A	9606.ENSP00000267953	9606.ENSP00000301071	0	0	0	0	0	0	0	0.413	0.412
BCL2A1	FAS	9606.ENSP00000267953	9606.ENSP00000347979	0	0	0	0	0.083	0	0	0.391	0.418
BCL2A1	CASP7	9606.ENSP00000267953	9606.ENSP00000358327	0	0	0	0	0	0.178	0	0.38	0.468
BCL2A1	CASP8	9606.ENSP00000267953	9606.ENSP00000351273	0	0	0	0	0.089	0.178	0	0.536	0.623
BCL2A1	TNF	9606.ENSP00000267953	9606.ENSP00000398698	0	0	0	0	0.347	0.059	0	0.517	0.677
BCL2A1	BCL2L1	9606.ENSP00000267953	9606.ENSP00000302564	0	0	0	0.651	0	0	0.9	0.802	0.927
BCL2A1	MCL1	9606.ENSP00000267953	9606.ENSP00000358022	0	0	0	0.653	0.062	0	0.9	0.867	0.931
BCL2A1	RELA	9606.ENSP00000267953	9606.ENSP00000384273	0	0	0	0	0	0	0.9	0.415	0.938
BCL2A1	TP53	9606.ENSP00000267953	9606.ENSP00000269305	0	0	0	0	0.051	0.078	0.9	0.507	0.951
BCL2A1	BID	9606.ENSP00000267953	9606.ENSP00000318822	0	0	0	0	0	0.944	0	0.381	0.964
BCL2A1	PMAIP1	9606.ENSP00000267953	9606.ENSP00000326119	0	0	0	0	0.062	0.904	0	0.93	0.993
BCL2L1	MAPK1	9606.ENSP00000302564	9606.ENSP00000215832	0	0	0	0	0.048	0	0.9	0.46	0.944
BCL2L1	NFKBIA	9606.ENSP00000302564	9606.ENSP00000216797	0	0	0	0	0.062	0.056	0	0.686	0.698
BCL2L1	CTSZ	9606.ENSP00000302564	9606.ENSP00000217131	0	0	0	0	0.096	0	0.6	0.053	0.628
BCL2L1	TSC2	9606.ENSP00000302564	9606.ENSP00000219476	0	0	0	0	0	0	0	0.456	0.456
BCL2L1	CTSH	9606.ENSP00000302564	9606.ENSP00000220166	0	0	0	0	0.072	0	0.6	0.052	0.617
BCL2L1	RPS6KB1	9606.ENSP00000302564	9606.ENSP00000225577	0	0	0	0	0	0	0	0.739	0.739
BCL2L1	CTSC	9606.ENSP00000302564	9606.ENSP00000227266	0	0	0	0	0.049	0	0.6	0.09	0.623
BCL2L1	CTSD	9606.ENSP00000302564	9606.ENSP00000236671	0	0	0	0	0.076	0	0.6	0.325	0.728
BCL2L1	TRAF2	9606.ENSP00000302564	9606.ENSP00000247668	0	0	0	0	0	0	0	0.405	0.405
BCL2L1	RAF1	9606.ENSP00000302564	9606.ENSP00000251849	0	0	0	0	0	0.676	0	0.501	0.831
BCL2L1	KRAS	9606.ENSP00000302564	9606.ENSP00000256078	0	0	0	0	0	0.141	0.8	0.849	0.971
BCL2L1	EIF2S1	9606.ENSP00000302564	9606.ENSP00000256383	0	0	0	0	0	0	0	0.468	0.468
BCL2L1	RIPK1	9606.ENSP00000302564	9606.ENSP00000259808	0	0	0	0	0	0	0	0.47	0.47
BCL2L1	PIK3C3	9606.ENSP00000302564	9606.ENSP00000262039	0	0	0	0	0	0.104	0	0.799	0.812
BCL2L1	RHEB	9606.ENSP00000302564	9606.ENSP00000262187	0	0	0	0	0.065	0	0	0.386	0.402
BCL2L1	PIK3CA	9606.ENSP00000302564	9606.ENSP00000263967	0	0	0	0	0	0.058	0	0.457	0.466
BCL2L1	IGF1R	9606.ENSP00000302564	9606.ENSP00000268035	0	0	0	0	0	0	0	0.544	0.544
BCL2L1	MAP1LC3B	9606.ENSP00000302564	9606.ENSP00000268607	0	0	0	0	0	0	0	0.549	0.549
BCL2L1	TP53	9606.ENSP00000302564	9606.ENSP00000269305	0	0	0	0	0.051	0.977	0.9	0.99	0.999
BCL2L1	CTSK	9606.ENSP00000302564	9606.ENSP00000271651	0	0	0	0	0.049	0	0.6	0.134	0.641
BCL2L1	BIRC5	9606.ENSP00000302564	9606.ENSP00000301633	0	0	0	0	0	0.063	0	0.537	0.547
BCL2L1	RPTOR	9606.ENSP00000302564	9606.ENSP00000307272	0	0	0	0	0.049	0	0	0.395	0.4
BCL2L1	IRS2	9606.ENSP00000302564	9606.ENSP00000365016	0	0	0	0	0	0.213	0	0.292	0.418
BCL2L1	CAPN1	9606.ENSP00000302564	9606.ENSP00000431984	0	0	0	0	0.07	0.213	0	0.284	0.43
BCL2L1	ULK1	9606.ENSP00000302564	9606.ENSP00000324560	0	0	0	0	0.06	0	0	0.431	0.443
BCL2L1	SQSTM1	9606.ENSP00000302564	9606.ENSP00000374455	0	0	0	0	0.084	0	0	0.467	0.491
BCL2L1	GADD45A	9606.ENSP00000302564	9606.ENSP00000360025	0	0	0	0	0	0	0	0.504	0.504
BCL2L1	ERN1	9606.ENSP00000302564	9606.ENSP00000401445	0	0	0	0	0	0.057	0	0.504	0.512
BCL2L1	FOS	9606.ENSP00000302564	9606.ENSP00000306245	0	0	0	0	0.062	0	0	0.545	0.554
BCL2L1	CHUK	9606.ENSP00000302564	9606.ENSP00000359424	0	0	0	0	0	0	0	0.557	0.557
BCL2L1	TRADD	9606.ENSP00000302564	9606.ENSP00000341268	0	0	0	0	0.092	0	0	0.577	0.599
BCL2L1	CTSV	9606.ENSP00000302564	9606.ENSP00000445052	0	0	0	0	0.049	0	0.6	0	0.603
BCL2L1	CTSW	9606.ENSP00000302564	9606.ENSP00000311300	0	0	0	0	0.049	0	0.6	0.043	0.604
BCL2L1	CTSO	9606.ENSP00000302564	9606.ENSP00000414904	0	0	0	0	0.049	0	0.6	0.043	0.604
BCL2L1	CTSS	9606.ENSP00000302564	9606.ENSP00000357981	0	0	0	0	0.049	0	0.6	0.112	0.632
BCL2L1	IRS1	9606.ENSP00000302564	9606.ENSP00000304895	0	0	0	0	0	0.27	0	0.519	0.634
BCL2L1	CTSL	9606.ENSP00000302564	9606.ENSP00000345344	0	0	0	0	0.049	0	0.6	0.207	0.671
BCL2L1	FAS	9606.ENSP00000302564	9606.ENSP00000347979	0	0	0	0	0	0	0	0.691	0.692
BCL2L1	RELA	9606.ENSP00000302564	9606.ENSP00000384273	0	0	0	0	0.069	0.27	0	0.612	0.713
BCL2L1	TNF	9606.ENSP00000302564	9606.ENSP00000398698	0	0	0	0	0	0.059	0	0.711	0.716
BCL2L1	PTEN	9606.ENSP00000302564	9606.ENSP00000361021	0	0	0	0	0	0.076	0	0.712	0.723
BCL2L1	CTSB	9606.ENSP00000302564	9606.ENSP00000345672	0	0	0	0	0.049	0	0.6	0.392	0.748
BCL2L1	CASP7	9606.ENSP00000302564	9606.ENSP00000358327	0	0	0	0	0	0.178	0	0.77	0.803
BCL2L1	PRKACA	9606.ENSP00000302564	9606.ENSP00000309591	0	0	0	0	0.065	0	0.9	0.076	0.906
BCL2L1	PRKACB	9606.ENSP00000302564	9606.ENSP00000359719	0	0	0	0	0	0	0.9	0.107	0.906
BCL2L1	MCL1	9606.ENSP00000302564	9606.ENSP00000358022	0	0	0	0.622	0	0.5	0.9	0.943	0.966
BCL2L1	MAPK8	9606.ENSP00000302564	9606.ENSP00000378974	0	0	0	0	0	0.69	0.8	0.607	0.973
BCL2L1	CASP8	9606.ENSP00000302564	9606.ENSP00000351273	0	0	0	0	0.052	0.727	0	0.916	0.976
BCL2L1	ITPR1	9606.ENSP00000302564	9606.ENSP00000306253	0	0	0	0	0.074	0	0	0.98	0.981
BCL2L1	HRAS	9606.ENSP00000302564	9606.ENSP00000407586	0	0	0	0	0.07	0.056	0	0.982	0.983
BCL2L1	BID	9606.ENSP00000302564	9606.ENSP00000318822	0	0	0	0	0	0.921	0.8	0.696	0.994
BCL2L1	PMAIP1	9606.ENSP00000302564	9606.ENSP00000326119	0	0	0	0	0	0.82	0.8	0.985	0.999
BID	CTSZ	9606.ENSP00000318822	9606.ENSP00000217131	0	0	0	0	0	0	0.6	0	0.6
BID	CTSH	9606.ENSP00000318822	9606.ENSP00000220166	0	0	0	0	0	0	0.6	0	0.6
BID	CTSC	9606.ENSP00000318822	9606.ENSP00000227266	0	0	0	0	0	0	0.6	0	0.6
BID	CTSD	9606.ENSP00000318822	9606.ENSP00000236671	0	0	0	0	0	0	0.9	0.15	0.911
BID	TRAF2	9606.ENSP00000318822	9606.ENSP00000247668	0	0	0	0	0	0.104	0.9	0.295	0.931
BID	RIPK1	9606.ENSP00000318822	9606.ENSP00000259808	0	0	0	0	0	0	0.9	0.365	0.933
BID	TP53	9606.ENSP00000318822	9606.ENSP00000269305	0	0	0	0	0	0	0.9	0.465	0.944
BID	CTSK	9606.ENSP00000318822	9606.ENSP00000271651	0	0	0	0	0	0	0.6	0.066	0.61
BID	CAPN2	9606.ENSP00000318822	9606.ENSP00000295006	0	0	0	0	0	0.434	0.8	0.165	0.897
BID	CTSW	9606.ENSP00000318822	9606.ENSP00000311300	0	0	0	0	0.062	0	0.6	0	0.608
BID	CASP7	9606.ENSP00000318822	9606.ENSP00000358327	0	0	0	0	0	0.056	0	0.464	0.472
BID	CTSV	9606.ENSP00000318822	9606.ENSP00000445052	0	0	0	0	0	0	0.6	0	0.6
BID	CTSO	9606.ENSP00000318822	9606.ENSP00000414904	0	0	0	0	0.049	0	0.6	0	0.603
BID	CTSL	9606.ENSP00000318822	9606.ENSP00000345344	0	0	0	0	0	0	0.6	0.113	0.63
BID	CTSS	9606.ENSP00000318822	9606.ENSP00000357981	0	0	0	0	0	0	0.6	0.128	0.636
BID	CTSB	9606.ENSP00000318822	9606.ENSP00000345672	0	0	0	0	0	0	0.6	0.24	0.683
BID	CAPN1	9606.ENSP00000318822	9606.ENSP00000431984	0	0	0	0	0	0.321	0.8	0.13	0.871
BID	MAPK8	9606.ENSP00000318822	9606.ENSP00000378974	0	0	0	0	0	0.287	0.8	0.246	0.883
BID	PMAIP1	9606.ENSP00000318822	9606.ENSP00000326119	0	0	0	0	0	0	0.8	0.556	0.907
BID	DAXX	9606.ENSP00000318822	9606.ENSP00000363668	0	0	0	0	0	0	0.9	0.215	0.918
BID	TNF	9606.ENSP00000318822	9606.ENSP00000398698	0	0	0	0	0	0.102	0.9	0.352	0.936
BID	TRADD	9606.ENSP00000318822	9606.ENSP00000341268	0	0	0	0	0.063	0	0.9	0.46	0.944
BID	FAS	9606.ENSP00000318822	9606.ENSP00000347979	0	0	0	0	0	0.676	0.9	0.504	0.982
BID	MCL1	9606.ENSP00000318822	9606.ENSP00000358022	0	0	0	0	0	0.979	0	0.556	0.99
BID	CASP8	9606.ENSP00000318822	9606.ENSP00000351273	0	0	0	0	0.062	0.683	0.9	0.838	0.994
BIRC5	KRAS	9606.ENSP00000301633	9606.ENSP00000256078	0	0	0	0	0	0.136	0	0.358	0.422
BIRC5	TP53	9606.ENSP00000301633	9606.ENSP00000269305	0	0	0	0	0.093	0	0.9	0.595	0.96
BIRC5	GADD45A	9606.ENSP00000301633	9606.ENSP00000360025	0	0	0	0	0	0	0	0.405	0.405
BIRC5	HRAS	9606.ENSP00000301633	9606.ENSP00000407586	0	0	0	0	0	0.075	0	0.405	0.426
BIRC5	PTEN	9606.ENSP00000301633	9606.ENSP00000361021	0	0	0	0	0.067	0.108	0	0.408	0.464
BIRC5	CASP8	9606.ENSP00000301633	9606.ENSP00000351273	0	0	0	0	0	0.193	0	0.402	0.497
BIRC5	MCL1	9606.ENSP00000301633	9606.ENSP00000358022	0	0	0	0	0	0.063	0	0.515	0.526
BIRC5	CASP7	9606.ENSP00000301633	9606.ENSP00000358327	0	0	0	0	0.049	0.729	0	0.411	0.835
BIRC5	FOS	9606.ENSP00000301633	9606.ENSP00000306245	0	0	0	0	0	0.062	0.9	0.321	0.93
CAPN1	NFKBIA	9606.ENSP00000431984	9606.ENSP00000216797	0	0	0	0	0.049	0.351	0	0.173	0.445
CAPN1	CTSD	9606.ENSP00000431984	9606.ENSP00000236671	0	0	0	0	0.107	0	0	0.444	0.483
CAPN1	PIK3CA	9606.ENSP00000431984	9606.ENSP00000263967	0	0	0	0	0.062	0	0.9	0	0.902
CAPN1	TP53	9606.ENSP00000431984	9606.ENSP00000269305	0	0	0	0	0	0.273	0.8	0.287	0.887
CAPN1	CAPN2	9606.ENSP00000431984	9606.ENSP00000295006	0	0	0	0.97	0.062	0.184	0.8	0.928	0.838
CAPN1	CTSL	9606.ENSP00000431984	9606.ENSP00000345344	0	0	0	0	0	0	0	0.427	0.427
CAPN1	CTSB	9606.ENSP00000431984	9606.ENSP00000345672	0	0	0	0	0	0	0	0.416	0.416
CAPN1	CASP8	9606.ENSP00000431984	9606.ENSP00000351273	0	0	0	0	0.062	0.058	0	0.507	0.527
CAPN1	CASP7	9606.ENSP00000431984	9606.ENSP00000358327	0	0	0	0	0.062	0.257	0	0.349	0.507
CAPN1	SPTAN1	9606.ENSP00000431984	9606.ENSP00000361824	0	0	0	0	0.062	0.27	0.9	0.639	0.971
CAPN2	MAPK1	9606.ENSP00000295006	9606.ENSP00000215832	0	0	0	0	0.062	0.497	0.9	0.218	0.958
CAPN2	TP53	9606.ENSP00000295006	9606.ENSP00000269305	0	0	0	0	0	0	0.8	0.221	0.837
CAPN2	SPTAN1	9606.ENSP00000295006	9606.ENSP00000361824	0	0	0	0	0.062	0	0	0.587	0.596
CAPN2	CASP8	9606.ENSP00000295006	9606.ENSP00000351273	0	0	0	0	0.062	0.058	0	0.671	0.684
CASP7	NFKBIA	9606.ENSP00000358327	9606.ENSP00000216797	0	0	0	0	0	0.09	0	0.402	0.432
CASP7	RPS6KB1	9606.ENSP00000358327	9606.ENSP00000225577	0	0	0	0	0.049	0.132	0	0.394	0.456
CASP7	EIF2S1	9606.ENSP00000358327	9606.ENSP00000256383	0	0	0	0	0.048	0	0	0.415	0.42
CASP7	RIPK1	9606.ENSP00000358327	9606.ENSP00000259808	0	0	0	0	0.062	0.063	0	0.46	0.483
CASP7	LMNB1	9606.ENSP00000358327	9606.ENSP00000261366	0	0	0	0	0	0.163	0	0.345	0.428
CASP7	MAP1LC3B	9606.ENSP00000358327	9606.ENSP00000268607	0	0	0	0	0	0.06	0	0.47	0.48
CASP7	TP53	9606.ENSP00000358327	9606.ENSP00000269305	0	0	0	0	0.062	0	0	0.674	0.681
CASP7	PMAIP1	9606.ENSP00000358327	9606.ENSP00000326119	0	0	0	0	0	0	0	0.509	0.509
CASP7	TRADD	9606.ENSP00000358327	9606.ENSP00000341268	0	0	0	0	0.07	0.056	0	0.568	0.587
CASP7	FAS	9606.ENSP00000358327	9606.ENSP00000347979	0	0	0	0	0.072	0.059	0.9	0.531	0.953
CASP7	CASP8	9606.ENSP00000358327	9606.ENSP00000351273	0	0	0	0.753	0.063	0.488	0.9	0.893	0.959
CASP7	LMNA	9606.ENSP00000358327	9606.ENSP00000357283	0	0	0	0	0.059	0.163	0	0.357	0.449
CASP7	MCL1	9606.ENSP00000358327	9606.ENSP00000358022	0	0	0	0	0.062	0.178	0	0.631	0.69
CASP7	TRAF6	9606.ENSP00000358327	9606.ENSP00000433623	0	0	0	0	0	0	0	0.429	0.429
CASP7	ERN1	9606.ENSP00000358327	9606.ENSP00000401445	0	0	0	0	0	0.063	0	0.466	0.479
CASP7	SPTAN1	9606.ENSP00000358327	9606.ENSP00000361824	0	0	0	0	0.062	0.282	0	0.293	0.483
CASP7	MAPK8	9606.ENSP00000358327	9606.ENSP00000378974	0	0	0	0	0	0	0	0.496	0.496
CASP7	PTEN	9606.ENSP00000358327	9606.ENSP00000361021	0	0	0	0	0.048	0	0	0.499	0.503
CASP7	TNF	9606.ENSP00000358327	9606.ENSP00000398698	0	0	0	0	0.062	0.102	0	0.525	0.565
CASP7	PARP4	9606.ENSP00000358327	9606.ENSP00000371419	0	0	0	0	0.069	0.097	0.8	0.067	0.822
CASP7	DAXX	9606.ENSP00000358327	9606.ENSP00000363668	0	0	0	0	0.062	0	0.9	0.212	0.919
CASP8	MAPK1	9606.ENSP00000351273	9606.ENSP00000215832	0	0	0	0	0	0.282	0.9	0.532	0.963
CASP8	NFKBIA	9606.ENSP00000351273	9606.ENSP00000216797	0	0	0	0	0.062	0.09	0	0.737	0.756
CASP8	RPS6KB1	9606.ENSP00000351273	9606.ENSP00000225577	0	0	0	0	0	0.064	0	0.464	0.476
CASP8	CTSD	9606.ENSP00000351273	9606.ENSP00000236671	0	0	0	0	0.052	0.058	0	0.415	0.432
CASP8	TRAF2	9606.ENSP00000351273	9606.ENSP00000247668	0	0	0	0	0.062	0.87	0.9	0.707	0.995
CASP8	RAF1	9606.ENSP00000351273	9606.ENSP00000251849	0	0	0	0	0	0.17	0	0.348	0.436
CASP8	KRAS	9606.ENSP00000351273	9606.ENSP00000256078	0	0	0	0	0	0.059	0	0.48	0.49
CASP8	EIF2S1	9606.ENSP00000351273	9606.ENSP00000256383	0	0	0	0	0	0	0	0.511	0.511
CASP8	RIPK1	9606.ENSP00000351273	9606.ENSP00000259808	0	0	0	0	0.063	0.92	0.9	0.995	0.999
CASP8	PIK3C3	9606.ENSP00000351273	9606.ENSP00000262039	0	0	0	0	0	0.282	0	0.396	0.548
CASP8	PIK3CA	9606.ENSP00000351273	9606.ENSP00000263967	0	0	0	0	0	0.075	0	0.459	0.478
CASP8	IGF1R	9606.ENSP00000351273	9606.ENSP00000268035	0	0	0	0	0	0.063	0	0.417	0.43
CASP8	MAP1LC3B	9606.ENSP00000351273	9606.ENSP00000268607	0	0	0	0	0	0.292	0	0.745	0.812
CASP8	TP53	9606.ENSP00000351273	9606.ENSP00000269305	0	0	0	0	0.143	0.27	0.8	0.839	0.977
CASP8	FOS	9606.ENSP00000351273	9606.ENSP00000306245	0	0	0	0	0.062	0	0	0.428	0.44
CASP8	PMAIP1	9606.ENSP00000351273	9606.ENSP00000326119	0	0	0	0	0	0	0	0.701	0.701
CASP8	TRADD	9606.ENSP00000351273	9606.ENSP00000341268	0	0	0	0	0.062	0.878	0.9	0.995	0.999
CASP8	HMGB1	9606.ENSP00000351273	9606.ENSP00000345347	0	0	0	0	0	0	0	0.416	0.416
CASP8	CTSB	9606.ENSP00000351273	9606.ENSP00000345672	0	0	0	0	0.052	0.058	0	0.476	0.491
CASP8	FAS	9606.ENSP00000351273	9606.ENSP00000347979	0	0	0	0	0.063	0.924	0.9	0.993	0.999
CASP8	LMNA	9606.ENSP00000351273	9606.ENSP00000357283	0	0	0	0	0	0.078	0	0.391	0.414
CASP8	MAP3K7	9606.ENSP00000351273	9606.ENSP00000358335	0	0	0	0	0.053	0.063	0	0.406	0.427
CASP8	GADD45A	9606.ENSP00000351273	9606.ENSP00000360025	0	0	0	0	0.144	0	0	0.403	0.467
CASP8	PRF1	9606.ENSP00000351273	9606.ENSP00000398568	0	0	0	0	0.085	0	0	0.467	0.492
CASP8	ERN1	9606.ENSP00000351273	9606.ENSP00000401445	0	0	0	0	0.069	0.063	0	0.518	0.542
CASP8	HRAS	9606.ENSP00000351273	9606.ENSP00000407586	0	0	0	0	0	0.059	0	0.548	0.556
CASP8	PTEN	9606.ENSP00000351273	9606.ENSP00000361021	0	0	0	0	0.048	0.27	0	0.568	0.674
CASP8	MAPK8	9606.ENSP00000351273	9606.ENSP00000378974	0	0	0	0	0	0.287	0	0.624	0.72
CASP8	MCL1	9606.ENSP00000351273	9606.ENSP00000358022	0	0	0	0	0.062	0.178	0	0.792	0.825
CASP8	MAP3K14	9606.ENSP00000351273	9606.ENSP00000482657	0	0	0	0	0.062	0.486	0.9	0.184	0.955
CASP8	RELA	9606.ENSP00000351273	9606.ENSP00000384273	0	0	0	0	0.062	0	0.9	0.571	0.956
CASP8	DAXX	9606.ENSP00000351273	9606.ENSP00000363668	0	0	0	0	0.062	0	0.9	0.647	0.964
CASP8	CHUK	9606.ENSP00000351273	9606.ENSP00000359424	0	0	0	0	0.053	0.317	0.9	0.83	0.987
CASP8	TNF	9606.ENSP00000351273	9606.ENSP00000398698	0	0	0	0	0.062	0.282	0.9	0.868	0.989
CASP8	SQSTM1	9606.ENSP00000351273	9606.ENSP00000374455	0	0	0	0	0	0.773	0	0.963	0.991
CASP8	TRAF6	9606.ENSP00000351273	9606.ENSP00000433623	0	0	0	0	0.053	0.816	0	0.974	0.995
CHUK	NFKBIA	9606.ENSP00000359424	9606.ENSP00000216797	0	0	0	0	0.049	0.994	0.9	0.935	0.999
CHUK	TSC2	9606.ENSP00000359424	9606.ENSP00000219476	0	0	0	0	0.074	0.058	0	0.389	0.421
CHUK	TRAF2	9606.ENSP00000359424	9606.ENSP00000247668	0	0	0	0	0.062	0.879	0.9	0.775	0.997
CHUK	KRAS	9606.ENSP00000359424	9606.ENSP00000256078	0	0	0	0	0.065	0.14	0	0.378	0.456
CHUK	RIPK1	9606.ENSP00000359424	9606.ENSP00000259808	0	0	0	0.554	0.09	0.487	0.9	0.723	0.965
CHUK	PIK3C3	9606.ENSP00000359424	9606.ENSP00000262039	0	0	0	0	0.062	0.104	0	0.358	0.413
CHUK	TP53	9606.ENSP00000359424	9606.ENSP00000269305	0	0	0	0	0.054	0.47	0	0.793	0.887
CHUK	IRS1	9606.ENSP00000359424	9606.ENSP00000304895	0	0	0	0	0	0.339	0.8	0.507	0.929
CHUK	FOS	9606.ENSP00000359424	9606.ENSP00000306245	0	0	0	0	0	0.064	0	0.462	0.475
CHUK	RPTOR	9606.ENSP00000359424	9606.ENSP00000307272	0	0	0	0	0.076	0.289	0	0.301	0.501
CHUK	TRADD	9606.ENSP00000359424	9606.ENSP00000341268	0	0	0	0	0.062	0.281	0.9	0.659	0.973
CHUK	HMGB1	9606.ENSP00000359424	9606.ENSP00000345347	0	0	0	0	0	0.058	0.9	0.327	0.931
CHUK	FAS	9606.ENSP00000359424	9606.ENSP00000347979	0	0	0	0	0.053	0	0.9	0.293	0.927
CHUK	MAP3K7	9606.ENSP00000359424	9606.ENSP00000358335	0	0	0	0.581	0.086	0.873	0.9	0.686	0.99
CHUK	HRAS	9606.ENSP00000359424	9606.ENSP00000407586	0	0	0	0	0.053	0.14	0	0.461	0.523
CHUK	IRS2	9606.ENSP00000359424	9606.ENSP00000365016	0	0	0	0	0	0.132	0.8	0.149	0.839
CHUK	SQSTM1	9606.ENSP00000359424	9606.ENSP00000374455	0	0	0	0	0	0.104	0.9	0.298	0.931
CHUK	PTEN	9606.ENSP00000359424	9606.ENSP00000361021	0	0	0	0	0.097	0.323	0.8	0.513	0.932
CHUK	TNF	9606.ENSP00000359424	9606.ENSP00000398698	0	0	0	0	0.062	0.68	0.9	0.777	0.992
CHUK	MAP3K14	9606.ENSP00000359424	9606.ENSP00000482657	0	0	0	0.55	0.065	0.903	0.9	0.62	0.992
CHUK	TRAF6	9606.ENSP00000359424	9606.ENSP00000433623	0	0	0	0	0.062	0.314	0.9	0.969	0.997
CHUK	RELA	9606.ENSP00000359424	9606.ENSP00000384273	0	0	0	0	0.068	0.878	0.9	0.899	0.998
CTSB	CTSZ	9606.ENSP00000345672	9606.ENSP00000217131	0	0	0	0.645	0.226	0.368	0	0.74	0.622
CTSB	CTSD	9606.ENSP00000345672	9606.ENSP00000236671	0	0	0	0	0.225	0.677	0.5	0.899	0.985
CTSB	MAP1LC3B	9606.ENSP00000345672	9606.ENSP00000268607	0	0	0	0	0.062	0	0	0.526	0.536
CTSB	TP53	9606.ENSP00000345672	9606.ENSP00000269305	0	0	0	0	0.062	0	0	0.46	0.471
CTSB	CTSK	9606.ENSP00000345672	9606.ENSP00000271651	0	0	0.217	0.644	0.096	0	0.3	0.705	0.535
CTSB	CTSL	9606.ENSP00000345672	9606.ENSP00000345344	0	0	0.27	0.652	0.244	0.157	0.8	0.954	0.915
CTSB	SQSTM1	9606.ENSP00000345672	9606.ENSP00000374455	0	0	0	0	0.109	0	0	0.569	0.599
CTSB	TNF	9606.ENSP00000345672	9606.ENSP00000398698	0	0	0	0	0	0	0	0.602	0.602
CTSB	CTSV	9606.ENSP00000345672	9606.ENSP00000445052	0	0	0.271	0.652	0.155	0.157	0.3	0.789	0.638
CTSB	LAMP2	9606.ENSP00000345672	9606.ENSP00000408411	0	0	0	0	0.092	0.179	0	0.622	0.694
CTSB	CTSS	9606.ENSP00000345672	9606.ENSP00000357981	0	0	0.223	0.675	0.104	0	0.8	0.635	0.86
CTSC	CTSZ	9606.ENSP00000227266	9606.ENSP00000217131	0	0	0	0.723	0.178	0	0.3	0.647	0.505
CTSC	RAB1A	9606.ENSP00000227266	9606.ENSP00000387286	0	0	0	0	0	0	0.6	0.101	0.625
CTSC	CTSD	9606.ENSP00000227266	9606.ENSP00000236671	0	0	0	0	0.063	0.219	0	0.639	0.713
CTSC	STX17	9606.ENSP00000227266	9606.ENSP00000259400	0	0	0	0	0.062	0	0.9	0	0.902
CTSD	CTSZ	9606.ENSP00000236671	9606.ENSP00000217131	0	0	0	0	0.172	0.219	0	0.657	0.759
CTSD	CTSH	9606.ENSP00000236671	9606.ENSP00000220166	0	0	0	0	0.108	0.219	0	0.696	0.77
CTSD	CTSW	9606.ENSP00000236671	9606.ENSP00000311300	0	0	0	0	0.063	0.18	0	0.303	0.418
CTSD	CTSO	9606.ENSP00000236671	9606.ENSP00000414904	0	0	0	0	0.09	0.18	0	0.313	0.443
CTSD	ULK1	9606.ENSP00000236671	9606.ENSP00000324560	0	0	0	0	0.096	0.078	0	0.443	0.495
CTSD	TP53	9606.ENSP00000236671	9606.ENSP00000269305	0	0	0	0	0	0	0	0.518	0.518
CTSD	TNF	9606.ENSP00000236671	9606.ENSP00000398698	0	0	0	0	0.062	0	0	0.536	0.547
CTSD	PIK3C3	9606.ENSP00000236671	9606.ENSP00000262039	0	0	0	0	0.049	0.078	0	0.538	0.56
CTSD	MAP1LC3B	9606.ENSP00000236671	9606.ENSP00000268607	0	0	0	0	0.062	0	0	0.619	0.627
CTSD	CTSV	9606.ENSP00000236671	9606.ENSP00000445052	0	0	0	0	0.094	0.219	0	0.558	0.66
CTSD	SQSTM1	9606.ENSP00000236671	9606.ENSP00000374455	0	0	0	0	0.107	0	0	0.636	0.661
CTSD	CTSS	9606.ENSP00000236671	9606.ENSP00000357981	0	0	0	0	0.063	0.219	0	0.616	0.694
CTSD	CTSK	9606.ENSP00000236671	9606.ENSP00000271651	0	0	0	0	0.086	0.219	0.5	0.574	0.827
CTSD	LAMP2	9606.ENSP00000236671	9606.ENSP00000408411	0	0	0	0	0.062	0.219	0	0.793	0.835
CTSD	CTSL	9606.ENSP00000236671	9606.ENSP00000345344	0	0	0	0	0.136	0.219	0.5	0.84	0.939
CTSH	TP53	9606.ENSP00000220166	9606.ENSP00000269305	0	0	0	0	0	0	0	0.439	0.439
CTSH	CTSL	9606.ENSP00000220166	9606.ENSP00000345344	0	0	0.362	0.868	0	0.618	0	0.801	0.673
CTSK	NFKBIA	9606.ENSP00000271651	9606.ENSP00000216797	0	0	0	0	0.062	0.07	0	0.478	0.505
CTSK	CTSS	9606.ENSP00000271651	9606.ENSP00000357981	0	0	0.425	0.949	0.246	0	0.3	0.561	0.476
CTSK	TNF	9606.ENSP00000271651	9606.ENSP00000398698	0	0	0	0	0	0	0	0.575	0.575
CTSK	CTSV	9606.ENSP00000271651	9606.ENSP00000445052	0	0	0.44	0.939	0	0.645	0	0.528	0.664
CTSK	TRAF6	9606.ENSP00000271651	9606.ENSP00000433623	0	0	0	0	0	0	0	0.687	0.687
CTSK	FOS	9606.ENSP00000271651	9606.ENSP00000306245	0	0	0	0	0.062	0	0	0.72	0.726
CTSK	CTSL	9606.ENSP00000271651	9606.ENSP00000345344	0	0	0.44	0.939	0.065	0.603	0.5	0.733	0.811
CTSL	MAPK1	9606.ENSP00000345344	9606.ENSP00000215832	0	0	0	0	0	0.121	0	0.735	0.757
CTSL	CTSZ	9606.ENSP00000345344	9606.ENSP00000217131	0	0	0.274	0.656	0.174	0	0	0.82	0.455
CTSL	MAP1LC3B	9606.ENSP00000345344	9606.ENSP00000268607	0	0	0	0	0.062	0	0	0.468	0.48
CTSL	TNF	9606.ENSP00000345344	9606.ENSP00000398698	0	0	0	0	0	0	0	0.427	0.426
CTSL	SQSTM1	9606.ENSP00000345344	9606.ENSP00000374455	0	0	0	0	0.07	0	0	0.429	0.447
CTSL	LAMP2	9606.ENSP00000345344	9606.ENSP00000408411	0	0	0	0	0.063	0.076	0	0.526	0.553
CTSL	CTSS	9606.ENSP00000345344	9606.ENSP00000357981	0	0	0.436	0.934	0.063	0	0.8	0.651	0.817
CTSL	CTSV	9606.ENSP00000345344	9606.ENSP00000445052	0	0	0.449	0.978	0	0.644	0.5	0.731	0.819
CTSS	TNF	9606.ENSP00000357981	9606.ENSP00000398698	0	0	0	0	0.17	0	0	0.311	0.404
CTSW	PRF1	9606.ENSP00000311300	9606.ENSP00000398568	0	0	0	0	0.564	0	0	0.246	0.657
CTSZ	RAB1A	9606.ENSP00000217131	9606.ENSP00000387286	0	0	0	0	0	0	0.6	0	0.6
CTSZ	STX17	9606.ENSP00000217131	9606.ENSP00000259400	0	0	0	0	0.062	0	0.9	0	0.902
DAB2IP	RRAS	9606.ENSP00000259371	9606.ENSP00000246792	0	0	0	0	0.06	0.102	0.9	0.139	0.917
DAB2IP	TRAF2	9606.ENSP00000259371	9606.ENSP00000247668	0	0	0	0	0.062	0.98	0.8	0.466	0.997
DAB2IP	KRAS	9606.ENSP00000259371	9606.ENSP00000256078	0	0	0	0	0.062	0.102	0.9	0.326	0.935
DAB2IP	ERN1	9606.ENSP00000259371	9606.ENSP00000401445	0	0	0	0	0.108	0	0.36	0.325	0.581
DAB2IP	TRADD	9606.ENSP00000259371	9606.ENSP00000341268	0	0	0	0	0	0.27	0	0.551	0.658
DAB2IP	RIPK1	9606.ENSP00000259371	9606.ENSP00000259808	0	0	0	0	0.063	0.486	0	0.568	0.774
DAB2IP	TP53	9606.ENSP00000259371	9606.ENSP00000269305	0	0	0	0	0	0.27	0	0.958	0.968
DAB2IP	HRAS	9606.ENSP00000259371	9606.ENSP00000407586	0	0	0	0	0.073	0.316	0.9	0.692	0.977
DAPK3	MAPK1	9606.ENSP00000442973	9606.ENSP00000215832	0	0	0.305	0.635	0.062	0.181	0.8	0.26	0.862
DAPK3	PIK3C3	9606.ENSP00000442973	9606.ENSP00000262039	0	0	0	0	0.062	0.101	0	0.504	0.545
DAPK3	TP53	9606.ENSP00000442973	9606.ENSP00000269305	0	0	0	0	0	0.317	0	0.289	0.494
DAPK3	DAXX	9606.ENSP00000442973	9606.ENSP00000363668	0	0	0	0	0.062	0.345	0	0.54	0.693
DAXX	TSC2	9606.ENSP00000363668	9606.ENSP00000219476	0	0	0	0	0	0	0	0.402	0.402
DAXX	TP53	9606.ENSP00000363668	9606.ENSP00000269305	0	0	0	0	0.062	0.894	0.8	0.966	0.999
DAXX	FAS	9606.ENSP00000363668	9606.ENSP00000347979	0	0	0	0	0.062	0.88	0.9	0.615	0.995
DAXX	MAP3K7	9606.ENSP00000363668	9606.ENSP00000358335	0	0	0	0	0	0.058	0	0.414	0.424
DAXX	PTEN	9606.ENSP00000363668	9606.ENSP00000361021	0	0	0	0	0.062	0.289	0	0.718	0.796
DAXX	HRAS	9606.ENSP00000363668	9606.ENSP00000407586	0	0	0	0	0.064	0	0	0.404	0.418
DAXX	TRAF6	9606.ENSP00000363668	9606.ENSP00000433623	0	0	0	0	0.062	0	0	0.472	0.485
DAXX	RELA	9606.ENSP00000363668	9606.ENSP00000384273	0	0	0	0	0.066	0.675	0	0.194	0.734
DAXX	MAPK8	9606.ENSP00000363668	9606.ENSP00000378974	0	0	0	0	0	0.246	0.8	0.458	0.911
EIF2S1	TSC2	9606.ENSP00000256383	9606.ENSP00000219476	0	0	0	0	0.055	0	0	0.469	0.476
EIF2S1	RPS6KB1	9606.ENSP00000256383	9606.ENSP00000225577	0	0	0	0	0.077	0	0	0.677	0.689
EIF2S1	ITPR1	9606.ENSP00000256383	9606.ENSP00000306253	0	0	0	0	0	0	0	0.409	0.409
EIF2S1	RPS6KB2	9606.ENSP00000256383	9606.ENSP00000308413	0	0	0	0	0	0	0	0.414	0.414
EIF2S1	IGBP1	9606.ENSP00000256383	9606.ENSP00000363661	0	0	0	0	0.106	0	0	0.405	0.446
EIF2S1	PMAIP1	9606.ENSP00000256383	9606.ENSP00000326119	0	0	0	0	0	0	0	0.459	0.459
EIF2S1	RHEB	9606.ENSP00000256383	9606.ENSP00000262187	0.05	0	0	0	0.062	0.103	0	0.406	0.462
EIF2S1	SQSTM1	9606.ENSP00000256383	9606.ENSP00000374455	0	0	0	0	0	0	0	0.466	0.466
EIF2S1	MCL1	9606.ENSP00000256383	9606.ENSP00000358022	0	0	0	0	0	0	0	0.467	0.467
EIF2S1	MAPK8	9606.ENSP00000256383	9606.ENSP00000378974	0	0	0	0	0	0	0	0.473	0.473
EIF2S1	RPTOR	9606.ENSP00000256383	9606.ENSP00000307272	0	0	0	0	0	0	0	0.497	0.497
EIF2S1	TP53	9606.ENSP00000256383	9606.ENSP00000269305	0	0	0	0	0.062	0	0	0.503	0.513
EIF2S1	MAP1LC3B	9606.ENSP00000256383	9606.ENSP00000268607	0	0	0	0	0.289	0	0	0.468	0.605
EIF2S1	ERN1	9606.ENSP00000256383	9606.ENSP00000401445	0	0	0	0	0	0	0	0.861	0.861
ERN1	TRAF2	9606.ENSP00000401445	9606.ENSP00000247668	0	0	0	0	0.062	0.881	0.8	0.989	0.999
ERN1	MAP1LC3B	9606.ENSP00000401445	9606.ENSP00000268607	0	0	0	0	0	0.103	0	0.581	0.608
ERN1	TP53	9606.ENSP00000401445	9606.ENSP00000269305	0	0	0	0	0	0.281	0	0.459	0.594
ERN1	IRS1	9606.ENSP00000401445	9606.ENSP00000304895	0	0	0	0	0	0.132	0	0.511	0.557
ERN1	ITPR1	9606.ENSP00000401445	9606.ENSP00000306253	0	0	0	0	0.062	0.058	0	0.506	0.525
ERN1	PMAIP1	9606.ENSP00000401445	9606.ENSP00000326119	0	0	0	0	0	0	0	0.465	0.465
ERN1	FAS	9606.ENSP00000401445	9606.ENSP00000347979	0	0	0	0	0	0	0	0.434	0.434
ERN1	MCL1	9606.ENSP00000401445	9606.ENSP00000358022	0	0	0	0	0	0.057	0	0.464	0.472
ERN1	SQSTM1	9606.ENSP00000401445	9606.ENSP00000374455	0	0	0	0	0.052	0.104	0	0.58	0.612
ERN1	TNF	9606.ENSP00000401445	9606.ENSP00000398698	0	0	0	0	0	0.056	0	0.957	0.957
ERN1	TRAF6	9606.ENSP00000401445	9606.ENSP00000433623	0	0	0	0	0.062	0.345	0	0.437	0.624
FAS	NFKBIA	9606.ENSP00000347979	9606.ENSP00000216797	0	0	0	0	0.063	0	0	0.415	0.428
FAS	TRAF2	9606.ENSP00000347979	9606.ENSP00000247668	0	0	0	0	0.062	0	0.6	0.323	0.723
FAS	RIPK1	9606.ENSP00000347979	9606.ENSP00000259808	0	0	0	0	0.062	0.476	0.9	0.734	0.985
FAS	PIK3CA	9606.ENSP00000347979	9606.ENSP00000263967	0	0	0	0	0	0	0.9	0.125	0.908
FAS	TP53	9606.ENSP00000347979	9606.ENSP00000269305	0	0	0	0	0.063	0	0.9	0.682	0.967
FAS	PMAIP1	9606.ENSP00000347979	9606.ENSP00000326119	0	0	0	0	0	0	0	0.56	0.56
FAS	IL3RA	9606.ENSP00000347979	9606.ENSP00000327890	0	0	0	0	0.062	0	0	0.498	0.509
FAS	TRADD	9606.ENSP00000347979	9606.ENSP00000341268	0	0	0	0	0.065	0.462	0.9	0.703	0.983
FAS	MCL1	9606.ENSP00000347979	9606.ENSP00000358022	0	0	0	0	0.062	0	0	0.595	0.603
FAS	PRF1	9606.ENSP00000347979	9606.ENSP00000398568	0	0	0	0	0	0	0	0.669	0.67
FAS	MAPK8	9606.ENSP00000347979	9606.ENSP00000378974	0	0	0	0	0	0.677	0	0.37	0.787
FAS	TNF	9606.ENSP00000347979	9606.ENSP00000398698	0	0	0	0	0.089	0.283	0	0.753	0.825
FOS	GADD45B	9606.ENSP00000306245	9606.ENSP00000215631	0	0	0	0	0.162	0	0	0.504	0.567
FOS	MAPK1	9606.ENSP00000306245	9606.ENSP00000215832	0	0	0	0	0	0.578	0.9	0.83	0.992
FOS	NFKBIA	9606.ENSP00000306245	9606.ENSP00000216797	0	0	0	0	0.097	0.056	0	0.661	0.686
FOS	RPS6KB1	9606.ENSP00000306245	9606.ENSP00000225577	0	0	0	0	0.062	0.102	0.8	0.425	0.89
FOS	TRAF2	9606.ENSP00000306245	9606.ENSP00000247668	0	0	0	0	0	0.244	0	0.293	0.442
FOS	RAF1	9606.ENSP00000306245	9606.ENSP00000251849	0	0	0	0	0	0.064	0	0.52	0.531
FOS	KRAS	9606.ENSP00000306245	9606.ENSP00000256078	0	0	0	0	0	0.117	0	0.623	0.653
FOS	LMNB1	9606.ENSP00000306245	9606.ENSP00000261366	0	0	0	0	0	0	0	0.487	0.487
FOS	IGF1R	9606.ENSP00000306245	9606.ENSP00000268035	0	0	0	0	0	0.064	0	0.458	0.471
FOS	TP53	9606.ENSP00000306245	9606.ENSP00000269305	0	0	0	0	0	0	0.6	0.717	0.882
FOS	MAP3K7	9606.ENSP00000306245	9606.ENSP00000358335	0	0	0	0	0	0.231	0	0.298	0.438
FOS	GADD45A	9606.ENSP00000306245	9606.ENSP00000360025	0	0	0	0	0.062	0	0	0.47	0.481
FOS	MCL1	9606.ENSP00000306245	9606.ENSP00000358022	0	0	0	0	0.117	0	0	0.456	0.499
FOS	PTEN	9606.ENSP00000306245	9606.ENSP00000361021	0	0	0	0	0.063	0.11	0	0.559	0.6
FOS	HRAS	9606.ENSP00000306245	9606.ENSP00000407586	0	0	0	0	0	0.117	0	0.68	0.705
FOS	TRAF6	9606.ENSP00000306245	9606.ENSP00000433623	0	0	0	0	0	0.244	0	0.626	0.705
FOS	RPS6KB2	9606.ENSP00000306245	9606.ENSP00000308413	0	0	0	0	0.062	0.102	0.8	0.061	0.82
FOS	PRKACB	9606.ENSP00000306245	9606.ENSP00000359719	0	0	0	0	0	0.149	0.8	0.182	0.848
FOS	PRKACA	9606.ENSP00000306245	9606.ENSP00000309591	0	0	0	0	0	0.301	0.8	0.085	0.861
FOS	LMNA	9606.ENSP00000306245	9606.ENSP00000357283	0	0	0	0	0	0.213	0	0.956	0.964
FOS	TNF	9606.ENSP00000306245	9606.ENSP00000398698	0	0	0	0	0	0	0.9	0.711	0.969
FOS	MAPK8	9606.ENSP00000306245	9606.ENSP00000378974	0	0	0	0	0	0.243	0.9	0.697	0.975
FOS	RELA	9606.ENSP00000306245	9606.ENSP00000384273	0	0	0	0	0	0.659	0.9	0.64	0.986
GADD45A	GADD45B	9606.ENSP00000360025	9606.ENSP00000215631	0	0	0	0.951	0.108	0.27	0.9	0.816	0.932
GADD45A	MAPK1	9606.ENSP00000360025	9606.ENSP00000215832	0	0	0	0	0	0.27	0	0.283	0.454
GADD45A	GADD45G	9606.ENSP00000360025	9606.ENSP00000252506	0	0	0	0.948	0.063	0.27	0.9	0.808	0.928
GADD45A	TP53	9606.ENSP00000360025	9606.ENSP00000269305	0	0	0	0	0.063	0.046	0.9	0.925	0.992
GADD45A	PMAIP1	9606.ENSP00000360025	9606.ENSP00000326119	0	0	0	0	0.062	0	0	0.633	0.641
GADD45A	MCL1	9606.ENSP00000360025	9606.ENSP00000358022	0	0	0	0	0	0	0	0.428	0.428
GADD45A	PTEN	9606.ENSP00000360025	9606.ENSP00000361021	0	0	0	0	0	0	0	0.461	0.461
GADD45A	MAPK8	9606.ENSP00000360025	9606.ENSP00000378974	0	0	0	0	0	0	0.9	0.345	0.931
GADD45B	RELA	9606.ENSP00000215631	9606.ENSP00000384273	0	0	0	0	0.069	0	0	0.385	0.402
GADD45B	PMAIP1	9606.ENSP00000215631	9606.ENSP00000326119	0	0	0	0	0.063	0	0	0.396	0.409
GADD45B	TNF	9606.ENSP00000215631	9606.ENSP00000398698	0	0	0	0	0.096	0	0	0.39	0.425
GADD45B	NFKBIA	9606.ENSP00000215631	9606.ENSP00000216797	0	0	0	0	0.22	0	0	0.4	0.512
GADD45B	MAPK8	9606.ENSP00000215631	9606.ENSP00000378974	0	0	0	0	0	0	0	0.515	0.515
GADD45B	TP53	9606.ENSP00000215631	9606.ENSP00000269305	0	0	0	0	0.052	0	0.8	0.521	0.901
GADD45B	GADD45G	9606.ENSP00000215631	9606.ENSP00000252506	0	0	0	0.947	0.216	0.213	0.9	0.83	0.935
GADD45G	MAPK8	9606.ENSP00000252506	9606.ENSP00000378974	0	0	0	0	0	0	0	0.487	0.487
GADD45G	TP53	9606.ENSP00000252506	9606.ENSP00000269305	0	0	0	0	0.052	0	0.8	0.575	0.912
HMGB1	MAPK1	9606.ENSP00000345347	9606.ENSP00000215832	0	0	0	0	0.062	0.308	0.6	0.173	0.756
HMGB1	NFKBIA	9606.ENSP00000345347	9606.ENSP00000216797	0	0	0	0	0	0.058	0	0.46	0.469
HMGB1	RIPK1	9606.ENSP00000345347	9606.ENSP00000259808	0	0	0	0	0	0.058	0	0.458	0.467
HMGB1	PIK3C3	9606.ENSP00000345347	9606.ENSP00000262039	0	0	0	0	0.062	0.061	0	0.403	0.428
HMGB1	MAP1LC3B	9606.ENSP00000345347	9606.ENSP00000268607	0	0	0	0	0.063	0.168	0	0.359	0.456
HMGB1	TP53	9606.ENSP00000345347	9606.ENSP00000269305	0	0	0	0	0.063	0.951	0	0.971	0.998
HMGB1	STK11	9606.ENSP00000345347	9606.ENSP00000324856	0	0	0	0	0.063	0	0	0.453	0.465
HMGB1	TRAF6	9606.ENSP00000345347	9606.ENSP00000433623	0	0	0	0	0	0.056	0	0.417	0.426
HMGB1	TNF	9606.ENSP00000345347	9606.ENSP00000398698	0	0	0	0	0	0	0	0.755	0.755
HMGB1	RELA	9606.ENSP00000345347	9606.ENSP00000384273	0	0	0	0	0.062	0.27	0.9	0.29	0.944
HRAS	MAPK1	9606.ENSP00000407586	9606.ENSP00000215832	0	0	0	0	0.111	0.686	0.8	0.768	0.985
HRAS	NFKBIA	9606.ENSP00000407586	9606.ENSP00000216797	0	0	0	0	0	0.076	0	0.447	0.467
HRAS	TSC2	9606.ENSP00000407586	9606.ENSP00000219476	0	0	0	0	0.053	0.173	0	0.682	0.73
HRAS	RPS6KB1	9606.ENSP00000407586	9606.ENSP00000225577	0	0	0	0	0	0.184	0	0.654	0.706
HRAS	RAF1	9606.ENSP00000407586	9606.ENSP00000251849	0	0	0	0	0.055	0.999	0.9	0.992	0.999
HRAS	KRAS	9606.ENSP00000407586	9606.ENSP00000256078	0	0	0.447	0.981	0	0.893	0.9	0.702	0.989
HRAS	PIK3R3	9606.ENSP00000407586	9606.ENSP00000262741	0	0	0	0	0	0.132	0.8	0.325	0.872
HRAS	PIK3CA	9606.ENSP00000407586	9606.ENSP00000263967	0	0	0	0	0.062	0.871	0.9	0.976	0.999
HRAS	IGF1R	9606.ENSP00000407586	9606.ENSP00000268035	0	0	0	0	0	0.14	0.9	0.704	0.972
HRAS	TP53	9606.ENSP00000407586	9606.ENSP00000269305	0	0	0	0	0	0.27	0	0.918	0.938
HRAS	TSC1	9606.ENSP00000407586	9606.ENSP00000298552	0	0	0	0	0	0.157	0	0.434	0.502
HRAS	IRS1	9606.ENSP00000407586	9606.ENSP00000304895	0	0	0	0	0	0.142	0.9	0.552	0.958
HRAS	RPTOR	9606.ENSP00000407586	9606.ENSP00000307272	0	0	0	0	0	0.104	0	0.488	0.521
HRAS	RPS6KB2	9606.ENSP00000407586	9606.ENSP00000308413	0	0	0	0	0	0.184	0	0.303	0.407
HRAS	PRKACA	9606.ENSP00000407586	9606.ENSP00000309591	0	0	0	0	0.085	0.256	0	0.251	0.446
HRAS	STK11	9606.ENSP00000407586	9606.ENSP00000324856	0	0	0	0	0.063	0.219	0	0.762	0.811
HRAS	PMAIP1	9606.ENSP00000407586	9606.ENSP00000326119	0	0	0	0	0	0	0	0.422	0.422
HRAS	IL3RA	9606.ENSP00000407586	9606.ENSP00000327890	0	0	0	0	0	0	0.8	0.215	0.836
HRAS	MCL1	9606.ENSP00000407586	9606.ENSP00000358022	0	0	0	0	0	0.13	0	0.601	0.638
HRAS	PRKACB	9606.ENSP00000407586	9606.ENSP00000359719	0	0	0	0	0.062	0.256	0	0.385	0.533
HRAS	PTEN	9606.ENSP00000407586	9606.ENSP00000361021	0	0	0	0	0.062	0.246	0	0.907	0.928
HRAS	SPTAN1	9606.ENSP00000407586	9606.ENSP00000361824	0	0	0	0	0.062	0.201	0.9	0.082	0.922
HRAS	IRS2	9606.ENSP00000407586	9606.ENSP00000365016	0	0	0	0	0	0.07	0.9	0.369	0.936
HRAS	PIK3CD	9606.ENSP00000407586	9606.ENSP00000366563	0	0	0	0	0.062	0.751	0.8	0.537	0.975
HRAS	MAPK8	9606.ENSP00000407586	9606.ENSP00000378974	0	0	0	0	0.054	0.777	0.8	0.644	0.983
HRAS	RELA	9606.ENSP00000407586	9606.ENSP00000384273	0	0	0	0	0	0	0.65	0.425	0.79
HRAS	TNF	9606.ENSP00000407586	9606.ENSP00000398698	0	0	0	0	0	0	0	0.623	0.623
HRAS	LAMP2	9606.ENSP00000407586	9606.ENSP00000408411	0	0	0	0	0	0	0	0.444	0.444
IGBP1	RPS6KB1	9606.ENSP00000363661	9606.ENSP00000225577	0	0	0	0	0	0.176	0	0.338	0.431
IGBP1	RRAGB	9606.ENSP00000363661	9606.ENSP00000262850	0	0	0	0	0.192	0	0	0.44	0.528
IGBP1	RPTOR	9606.ENSP00000363661	9606.ENSP00000307272	0	0	0	0	0.065	0.181	0.8	0.63	0.935
IGBP1	RPS6KB2	9606.ENSP00000363661	9606.ENSP00000308413	0	0	0	0	0	0.176	0	0.302	0.4
IGBP1	RRAGD	9606.ENSP00000363661	9606.ENSP00000358423	0	0	0	0	0	0	0	0.4	0.4
IGBP1	RRAGC	9606.ENSP00000363661	9606.ENSP00000362092	0	0	0	0	0	0	0	0.4	0.4
IGBP1	RRAGA	9606.ENSP00000363661	9606.ENSP00000369899	0	0	0	0	0	0	0	0.44	0.44
IGF1R	SNAP29	9606.ENSP00000268035	9606.ENSP00000215730	0	0	0	0	0	0.334	0	0.683	0.78
IGF1R	MAPK1	9606.ENSP00000268035	9606.ENSP00000215832	0	0	0	0.57	0	0.148	0.9	0.653	0.935
IGF1R	TSC2	9606.ENSP00000268035	9606.ENSP00000219476	0	0	0	0	0.062	0.12	0	0.59	0.632
IGF1R	RPS6KB1	9606.ENSP00000268035	9606.ENSP00000225577	0	0	0	0.553	0.056	0.119	0.9	0.839	0.943
IGF1R	RAF1	9606.ENSP00000268035	9606.ENSP00000251849	0	0	0	0.586	0	0	0.9	0.588	0.923
IGF1R	KRAS	9606.ENSP00000268035	9606.ENSP00000256078	0	0	0	0	0	0.206	0.8	0.679	0.944
IGF1R	RHEB	9606.ENSP00000268035	9606.ENSP00000262187	0	0	0	0	0.055	0.14	0	0.581	0.63
IGF1R	PIK3R3	9606.ENSP00000268035	9606.ENSP00000262741	0	0	0	0	0	0.862	0.8	0.889	0.996
IGF1R	PIK3CA	9606.ENSP00000268035	9606.ENSP00000263967	0	0	0	0	0.063	0.146	0.9	0.889	0.989
IGF1R	MCL1	9606.ENSP00000268035	9606.ENSP00000358022	0	0	0	0	0	0	0	0.47	0.47
IGF1R	TNF	9606.ENSP00000268035	9606.ENSP00000398698	0	0	0	0	0	0.056	0	0.475	0.483
IGF1R	TSC1	9606.ENSP00000268035	9606.ENSP00000298552	0	0	0	0	0	0.179	0	0.422	0.505
IGF1R	MAPK8	9606.ENSP00000268035	9606.ENSP00000378974	0	0	0	0	0	0.101	0	0.492	0.524
IGF1R	RPTOR	9606.ENSP00000268035	9606.ENSP00000307272	0	0	0	0	0.076	0.067	0	0.665	0.686
IGF1R	TRAF6	9606.ENSP00000268035	9606.ENSP00000433623	0	0	0	0	0.062	0.099	0.6	0.207	0.696
IGF1R	TP53	9606.ENSP00000268035	9606.ENSP00000269305	0	0	0	0	0	0.281	0	0.686	0.764
IGF1R	PRKACA	9606.ENSP00000268035	9606.ENSP00000309591	0	0	0	0.576	0.063	0.101	0.9	0.092	0.91
IGF1R	PRKACB	9606.ENSP00000268035	9606.ENSP00000359719	0	0	0	0.57	0.063	0.101	0.9	0.181	0.914
IGF1R	PIK3CD	9606.ENSP00000268035	9606.ENSP00000366563	0	0	0	0	0.063	0.202	0.8	0.51	0.917
IGF1R	PTEN	9606.ENSP00000268035	9606.ENSP00000361021	0	0	0	0	0.054	0.413	0	0.906	0.943
IGF1R	IRS2	9606.ENSP00000268035	9606.ENSP00000365016	0	0	0	0	0	0.525	0.9	0.974	0.998
IGF1R	IRS1	9606.ENSP00000268035	9606.ENSP00000304895	0	0	0	0	0.06	0.983	0.9	0.991	0.999
IL3RA	KRAS	9606.ENSP00000327890	9606.ENSP00000256078	0	0	0	0	0	0	0.8	0.123	0.817
IL3RA	PIK3R3	9606.ENSP00000327890	9606.ENSP00000262741	0	0	0	0	0	0	0.5	0	0.499
IL3RA	PIK3CA	9606.ENSP00000327890	9606.ENSP00000263967	0	0	0	0	0	0	0.9	0.073	0.903
IL3RA	PRKACA	9606.ENSP00000327890	9606.ENSP00000309591	0	0	0	0	0	0	0.9	0.124	0.908
IL3RA	PRF1	9606.ENSP00000327890	9606.ENSP00000398568	0	0	0	0	0.069	0	0	0.395	0.412
IL3RA	PIK3CD	9606.ENSP00000327890	9606.ENSP00000366563	0	0	0	0	0.06	0	0.5	0.054	0.516
IL3RA	TNF	9606.ENSP00000327890	9606.ENSP00000398698	0	0	0	0	0.076	0	0	0.531	0.548
IL3RA	PRKACB	9606.ENSP00000327890	9606.ENSP00000359719	0	0	0	0	0	0	0.9	0.124	0.908
IRS1	MAPK1	9606.ENSP00000304895	9606.ENSP00000215832	0	0	0	0	0	0.213	0.9	0.539	0.96
IRS1	NFKBIA	9606.ENSP00000304895	9606.ENSP00000216797	0	0	0	0	0	0.151	0	0.484	0.543
IRS1	TSC2	9606.ENSP00000304895	9606.ENSP00000219476	0	0	0	0	0.049	0	0	0.747	0.749
IRS1	RPS6KB1	9606.ENSP00000304895	9606.ENSP00000225577	0	0	0	0	0	0.5	0.9	0.907	0.994
IRS1	RAF1	9606.ENSP00000304895	9606.ENSP00000251849	0	0	0	0	0	0.132	0	0.4	0.457
IRS1	KRAS	9606.ENSP00000304895	9606.ENSP00000256078	0	0	0	0	0	0.142	0.9	0.53	0.956
IRS1	PIK3C3	9606.ENSP00000304895	9606.ENSP00000262039	0	0	0	0	0	0.163	0.6	0.329	0.756
IRS1	RHEB	9606.ENSP00000304895	9606.ENSP00000262187	0	0	0	0	0	0.07	0	0.714	0.722
IRS1	PIK3R3	9606.ENSP00000304895	9606.ENSP00000262741	0	0	0	0	0.062	0.914	0.8	0.972	0.999
IRS1	PIK3CA	9606.ENSP00000304895	9606.ENSP00000263967	0	0	0	0	0.062	0.92	0.9	0.988	0.999
IRS1	TP53	9606.ENSP00000304895	9606.ENSP00000269305	0	0	0	0	0	0.182	0	0.53	0.599
IRS1	TSC1	9606.ENSP00000304895	9606.ENSP00000298552	0	0	0	0	0	0	0	0.696	0.696
IRS1	STK11	9606.ENSP00000304895	9606.ENSP00000324856	0	0	0	0	0	0	0	0.547	0.547
IRS1	TNF	9606.ENSP00000304895	9606.ENSP00000398698	0	0	0	0	0	0	0	0.691	0.691
IRS1	SQSTM1	9606.ENSP00000304895	9606.ENSP00000374455	0	0	0	0	0	0.256	0	0.703	0.77
IRS1	PTEN	9606.ENSP00000304895	9606.ENSP00000361021	0	0	0	0	0.062	0.269	0	0.791	0.844
IRS1	RPS6KB2	9606.ENSP00000304895	9606.ENSP00000308413	0	0	0	0	0	0.061	0.8	0.615	0.921
IRS1	PIK3CD	9606.ENSP00000304895	9606.ENSP00000366563	0	0	0	0	0.062	0.397	0.8	0.548	0.942
IRS1	IRS2	9606.ENSP00000304895	9606.ENSP00000365016	0	0	0	0.822	0.062	0.345	0.9	0.957	0.944
IRS1	MAPK8	9606.ENSP00000304895	9606.ENSP00000378974	0	0	0	0	0.062	0.69	0.8	0.792	0.986
IRS1	RPTOR	9606.ENSP00000304895	9606.ENSP00000307272	0	0	0	0	0	0.675	0.9	0.714	0.989
IRS2	MAPK1	9606.ENSP00000365016	9606.ENSP00000215832	0	0	0	0	0	0	0.9	0.272	0.924
IRS2	TSC2	9606.ENSP00000365016	9606.ENSP00000219476	0	0	0	0	0.062	0	0	0.553	0.563
IRS2	RPS6KB1	9606.ENSP00000365016	9606.ENSP00000225577	0	0	0	0	0	0.281	0	0.629	0.722
IRS2	KRAS	9606.ENSP00000365016	9606.ENSP00000256078	0	0	0	0	0	0.07	0.9	0.374	0.936
IRS2	PIK3C3	9606.ENSP00000365016	9606.ENSP00000262039	0	0	0	0	0	0.163	0.6	0.205	0.71
IRS2	RHEB	9606.ENSP00000365016	9606.ENSP00000262187	0	0	0	0	0	0.07	0	0.401	0.419
IRS2	PIK3R3	9606.ENSP00000365016	9606.ENSP00000262741	0	0	0	0	0.052	0.596	0.8	0.393	0.947
IRS2	PIK3CA	9606.ENSP00000365016	9606.ENSP00000263967	0	0	0	0	0.062	0.737	0.9	0.581	0.988
IRS2	TP53	9606.ENSP00000365016	9606.ENSP00000269305	0	0	0	0	0	0.151	0	0.393	0.462
IRS2	TSC1	9606.ENSP00000365016	9606.ENSP00000298552	0	0	0	0	0	0	0	0.486	0.486
IRS2	RPTOR	9606.ENSP00000365016	9606.ENSP00000307272	0	0	0	0	0	0.27	0	0.494	0.615
IRS2	PTEN	9606.ENSP00000365016	9606.ENSP00000361021	0	0	0	0	0.049	0.161	0	0.55	0.609
IRS2	TNF	9606.ENSP00000365016	9606.ENSP00000398698	0	0	0	0	0	0	0	0.484	0.484
IRS2	MAPK8	9606.ENSP00000365016	9606.ENSP00000378974	0	0	0	0	0	0.057	0.8	0.406	0.878
IRS2	PIK3CD	9606.ENSP00000365016	9606.ENSP00000366563	0	0	0	0	0.062	0.357	0.8	0.296	0.903
ITPR1	KRAS	9606.ENSP00000306253	9606.ENSP00000256078	0	0	0	0	0	0.145	0	0.45	0.511
ITPR1	PIK3C3	9606.ENSP00000306253	9606.ENSP00000262039	0	0	0	0	0.063	0.066	0	0.408	0.436
ITPR1	PTEN	9606.ENSP00000306253	9606.ENSP00000361021	0	0	0	0	0.062	0	0	0.734	0.741
ITPR1	ITPR2	9606.ENSP00000306253	9606.ENSP00000370744	0	0	0	0.972	0.073	0	0.8	0.861	0.811
ITPR1	PRKACB	9606.ENSP00000306253	9606.ENSP00000359719	0	0	0	0	0.098	0.078	0.9	0.211	0.925
ITPR1	PRKACA	9606.ENSP00000306253	9606.ENSP00000309591	0	0	0	0	0.077	0.263	0.9	0.211	0.939
ITPR1	MCL1	9606.ENSP00000306253	9606.ENSP00000358022	0	0	0	0	0	0	0	0.979	0.979
ITPR2	PRKACA	9606.ENSP00000370744	9606.ENSP00000309591	0	0	0	0	0.077	0.231	0.9	0.142	0.931
ITPR2	PRKACB	9606.ENSP00000370744	9606.ENSP00000359719	0	0	0	0	0.077	0.064	0.9	0.169	0.918
KIAA0226	STX17	9606.ENSP00000296343	9606.ENSP00000259400	0	0	0	0	0.064	0	0	0.421	0.435
KIAA0226	PIK3C3	9606.ENSP00000296343	9606.ENSP00000262039	0	0	0	0	0.063	0.873	0	0.909	0.988
KIAA0226	WIPI1	9606.ENSP00000296343	9606.ENSP00000262139	0	0	0	0	0	0	0	0.543	0.543
KIAA0226	MAP1LC3B	9606.ENSP00000296343	9606.ENSP00000268607	0	0	0	0	0	0	0	0.445	0.445
KIAA0226	NRBF2	9606.ENSP00000296343	9606.ENSP00000277746	0	0	0	0	0	0	0	0.466	0.466
KIAA0226	ULK2	9606.ENSP00000296343	9606.ENSP00000378914	0	0	0	0	0.062	0	0	0.419	0.431
KIAA0226	ULK1	9606.ENSP00000296343	9606.ENSP00000324560	0	0	0	0	0.062	0	0	0.518	0.528
KIAA0226	SQSTM1	9606.ENSP00000296343	9606.ENSP00000374455	0	0	0	0	0.062	0.175	0	0.503	0.581
KIAA0226	SH3GLB1	9606.ENSP00000296343	9606.ENSP00000479919	0	0	0	0	0.062	0	0	0.652	0.659
KRAS	MAPK1	9606.ENSP00000256078	9606.ENSP00000215832	0	0	0	0	0.111	0.823	0.8	0.703	0.989
KRAS	NFKBIA	9606.ENSP00000256078	9606.ENSP00000216797	0	0	0	0	0	0.076	0	0.412	0.434
KRAS	TSC2	9606.ENSP00000256078	9606.ENSP00000219476	0	0	0	0	0.053	0.173	0	0.604	0.663
KRAS	RPS6KB1	9606.ENSP00000256078	9606.ENSP00000225577	0	0	0	0	0.063	0.184	0	0.592	0.66
KRAS	RAF1	9606.ENSP00000256078	9606.ENSP00000251849	0	0	0	0	0.055	0.972	0.9	0.979	0.999
KRAS	PRKACA	9606.ENSP00000256078	9606.ENSP00000309591	0	0	0	0	0.062	0.256	0	0.249	0.43
KRAS	TRAF6	9606.ENSP00000256078	9606.ENSP00000433623	0	0	0	0	0	0.282	0	0.321	0.492
KRAS	RPTOR	9606.ENSP00000256078	9606.ENSP00000307272	0	0	0	0	0	0.163	0	0.458	0.528
KRAS	PRKACB	9606.ENSP00000256078	9606.ENSP00000359719	0	0	0	0	0.062	0.256	0	0.38	0.529
KRAS	TSC1	9606.ENSP00000256078	9606.ENSP00000298552	0	0	0	0	0	0.269	0	0.39	0.535
KRAS	MCL1	9606.ENSP00000256078	9606.ENSP00000358022	0	0	0	0	0	0.128	0	0.55	0.59
KRAS	TNF	9606.ENSP00000256078	9606.ENSP00000398698	0	0	0	0	0	0	0	0.594	0.594
KRAS	STK11	9606.ENSP00000256078	9606.ENSP00000324856	0	0	0	0	0.062	0.141	0	0.759	0.789
KRAS	PIK3R3	9606.ENSP00000256078	9606.ENSP00000262741	0	0	0	0	0	0.132	0.8	0.286	0.865
KRAS	RELA	9606.ENSP00000256078	9606.ENSP00000384273	0	0	0	0	0	0	0.65	0.63	0.865
KRAS	TP53	9606.ENSP00000256078	9606.ENSP00000269305	0	0	0	0	0	0	0	0.919	0.919
KRAS	PIK3CD	9606.ENSP00000256078	9606.ENSP00000366563	0	0	0	0	0.062	0.253	0.8	0.497	0.92
KRAS	SPTAN1	9606.ENSP00000256078	9606.ENSP00000361824	0	0	0	0	0.062	0.2	0.9	0.077	0.921
KRAS	PTEN	9606.ENSP00000256078	9606.ENSP00000361021	0	0	0	0	0.063	0.246	0	0.898	0.921
KRAS	MAPK8	9606.ENSP00000256078	9606.ENSP00000378974	0	0	0	0	0.054	0.328	0.8	0.474	0.924
KRAS	PIK3CA	9606.ENSP00000256078	9606.ENSP00000263967	0	0	0	0	0.108	0.59	0.9	0.983	0.999
LAMP2	SNAP29	9606.ENSP00000408411	9606.ENSP00000215730	0	0	0	0	0	0	0	0.404	0.404
LAMP2	TSC2	9606.ENSP00000408411	9606.ENSP00000219476	0	0	0	0	0	0	0	0.538	0.539
LAMP2	RPS6KB1	9606.ENSP00000408411	9606.ENSP00000225577	0	0	0	0	0	0.064	0	0.475	0.488
LAMP2	STX17	9606.ENSP00000408411	9606.ENSP00000259400	0	0	0	0	0.062	0.07	0	0.561	0.584
LAMP2	PIK3C3	9606.ENSP00000408411	9606.ENSP00000262039	0	0	0	0	0	0.056	0	0.63	0.635
LAMP2	WIPI1	9606.ENSP00000408411	9606.ENSP00000262139	0	0	0	0	0.076	0	0	0.409	0.43
LAMP2	RHEB	9606.ENSP00000408411	9606.ENSP00000262187	0	0	0	0	0.062	0.13	0	0.489	0.547
LAMP2	RRAGB	9606.ENSP00000408411	9606.ENSP00000262850	0	0	0	0	0.154	0.27	0	0.518	0.676
LAMP2	MAP1LC3B	9606.ENSP00000408411	9606.ENSP00000268607	0	0	0	0	0.107	0.294	0	0.75	0.829
LAMP2	RPTOR	9606.ENSP00000408411	9606.ENSP00000307272	0	0	0	0	0	0.168	0	0.611	0.663
LAMP2	ULK1	9606.ENSP00000408411	9606.ENSP00000324560	0	0	0	0	0.049	0	0	0.531	0.535
LAMP2	RRAGD	9606.ENSP00000408411	9606.ENSP00000358423	0	0	0	0	0.062	0	0	0.418	0.431
LAMP2	RRAGC	9606.ENSP00000408411	9606.ENSP00000362092	0	0	0	0	0.095	0	0	0.528	0.554
LAMP2	RRAGA	9606.ENSP00000408411	9606.ENSP00000369899	0	0	0	0	0	0	0	0.448	0.448
LAMP2	SQSTM1	9606.ENSP00000408411	9606.ENSP00000374455	0	0	0	0	0	0.27	0	0.715	0.783
LAMP2	ULK2	9606.ENSP00000408411	9606.ENSP00000378914	0	0	0	0	0.062	0	0	0.393	0.406
LAMP2	TNF	9606.ENSP00000408411	9606.ENSP00000398698	0	0	0	0	0	0.27	0	0.405	0.547
LMNA	MAPK1	9606.ENSP00000357283	9606.ENSP00000215832	0	0	0	0	0	0.251	0.6	0.295	0.77
LMNA	NFKBIA	9606.ENSP00000357283	9606.ENSP00000216797	0	0	0	0	0.062	0.056	0	0.5	0.519
LMNA	RAF1	9606.ENSP00000357283	9606.ENSP00000251849	0	0	0	0	0.049	0.056	0.9	0.132	0.911
LMNA	LMNB1	9606.ENSP00000357283	9606.ENSP00000261366	0	0	0	0.949	0	0.896	0.9	0.926	0.989
LMNA	TP53	9606.ENSP00000357283	9606.ENSP00000269305	0	0	0	0	0.062	0.26	0	0.596	0.695
LMNA	TUBA1A	9606.ENSP00000357283	9606.ENSP00000301071	0	0	0	0	0.062	0	0	0.4	0.413
LMNA	LMNB2	9606.ENSP00000357283	9606.ENSP00000327054	0	0	0	0.942	0.099	0.741	0.9	0.774	0.975
LMNA	PTEN	9606.ENSP00000357283	9606.ENSP00000361021	0	0	0	0	0	0.27	0	0.299	0.466
LMNA	TNF	9606.ENSP00000357283	9606.ENSP00000398698	0	0	0	0	0	0.102	0	0.467	0.501
LMNB1	NFKBIA	9606.ENSP00000261366	9606.ENSP00000216797	0	0	0	0	0	0.056	0	0.545	0.552
LMNB1	SPTAN1	9606.ENSP00000261366	9606.ENSP00000361824	0	0	0	0	0	0.27	0	0.275	0.448
LMNB1	TP53	9606.ENSP00000261366	9606.ENSP00000269305	0	0	0	0	0.086	0	0	0.518	0.54
LMNB1	MAP1LC3B	9606.ENSP00000261366	9606.ENSP00000268607	0	0	0	0	0.051	0.358	0	0.627	0.753
LMNB1	LMNB2	9606.ENSP00000261366	9606.ENSP00000327054	0	0	0	0.959	0.274	0.63	0.9	0.795	0.971
LMNB2	MAPK1	9606.ENSP00000327054	9606.ENSP00000215832	0	0	0	0	0	0.75	0	0.154	0.779
MAP1LC3B	SNAP29	9606.ENSP00000268607	9606.ENSP00000215730	0	0	0	0	0.062	0	0	0.506	0.517
MAP1LC3B	TSC2	9606.ENSP00000268607	9606.ENSP00000219476	0	0	0	0	0	0	0	0.535	0.535
MAP1LC3B	RPS6KB1	9606.ENSP00000268607	9606.ENSP00000225577	0	0	0	0	0	0	0	0.697	0.697
MAP1LC3B	STX17	9606.ENSP00000268607	9606.ENSP00000259400	0	0	0	0	0.065	0.291	0	0.564	0.686
MAP1LC3B	PIK3C3	9606.ENSP00000268607	9606.ENSP00000262039	0	0	0	0	0.063	0.058	0.9	0.797	0.979
MAP1LC3B	WIPI1	9606.ENSP00000268607	9606.ENSP00000262139	0	0	0	0	0.148	0.18	0	0.654	0.737
MAP1LC3B	VMP1	9606.ENSP00000268607	9606.ENSP00000262291	0	0	0	0	0.064	0	0	0.419	0.433
MAP1LC3B	PRKAA1	9606.ENSP00000268607	9606.ENSP00000346148	0	0	0	0	0.065	0.056	0	0.382	0.407
MAP1LC3B	MAPK8	9606.ENSP00000268607	9606.ENSP00000378974	0	0	0	0	0	0	0	0.421	0.421
MAP1LC3B	STK11	9606.ENSP00000268607	9606.ENSP00000324856	0	0	0	0	0.065	0.056	0	0.406	0.43
MAP1LC3B	MCL1	9606.ENSP00000268607	9606.ENSP00000358022	0	0	0	0	0.095	0	0	0.404	0.438
MAP1LC3B	TNF	9606.ENSP00000268607	9606.ENSP00000398698	0	0	0	0	0	0	0	0.487	0.487
MAP1LC3B	PTEN	9606.ENSP00000268607	9606.ENSP00000361021	0	0	0	0	0.057	0	0	0.486	0.495
MAP1LC3B	TP53INP2	9606.ENSP00000268607	9606.ENSP00000363943	0	0	0	0	0.063	0.057	0	0.519	0.539
MAP1LC3B	RPTOR	9606.ENSP00000268607	9606.ENSP00000307272	0	0	0	0	0	0	0	0.546	0.546
MAP1LC3B	TRAF6	9606.ENSP00000268607	9606.ENSP00000433623	0	0	0	0	0.062	0.27	0	0.495	0.624
MAP1LC3B	TP53	9606.ENSP00000268607	9606.ENSP00000269305	0	0	0	0	0	0.118	0	0.593	0.625
MAP1LC3B	ULK2	9606.ENSP00000268607	9606.ENSP00000378914	0	0	0	0	0.073	0.261	0	0.621	0.717
MAP1LC3B	ULK1	9606.ENSP00000268607	9606.ENSP00000324560	0	0	0	0	0.073	0.865	0.65	0.725	0.986
MAP1LC3B	SQSTM1	9606.ENSP00000268607	9606.ENSP00000374455	0	0	0	0	0.071	0.931	0.6	0.995	0.999
MAP3K14	MAPK1	9606.ENSP00000482657	9606.ENSP00000215832	0	0	0	0.609	0.056	0.246	0.9	0.324	0.931
MAP3K14	NFKBIA	9606.ENSP00000482657	9606.ENSP00000216797	0	0	0	0	0.062	0.297	0	0.457	0.61
MAP3K14	TRAF2	9606.ENSP00000482657	9606.ENSP00000247668	0	0	0	0	0.062	0.882	0.9	0.392	0.992
MAP3K14	RIPK1	9606.ENSP00000482657	9606.ENSP00000259808	0	0	0	0.548	0.065	0.296	0.9	0.234	0.935
MAP3K14	TRADD	9606.ENSP00000482657	9606.ENSP00000341268	0	0	0	0	0	0	0.9	0.347	0.931
MAP3K14	MAP3K7	9606.ENSP00000482657	9606.ENSP00000358335	0	0	0	0.565	0.065	0.504	0.9	0.383	0.957
MAP3K14	RELA	9606.ENSP00000482657	9606.ENSP00000384273	0	0	0	0	0	0	0	0.457	0.457
MAP3K14	TNF	9606.ENSP00000482657	9606.ENSP00000398698	0	0	0	0	0	0	0.9	0.276	0.924
MAP3K14	TRAF6	9606.ENSP00000482657	9606.ENSP00000433623	0	0	0	0	0	0.755	0.8	0.388	0.967
MAP3K7	MAPK1	9606.ENSP00000358335	9606.ENSP00000215832	0	0	0	0.611	0	0.148	0.8	0.418	0.849
MAP3K7	NFKBIA	9606.ENSP00000358335	9606.ENSP00000216797	0	0	0	0	0	0.33	0.65	0.636	0.907
MAP3K7	TRAF2	9606.ENSP00000358335	9606.ENSP00000247668	0	0	0	0	0.062	0.875	0.9	0.468	0.992
MAP3K7	RIPK1	9606.ENSP00000358335	9606.ENSP00000259808	0	0	0	0.585	0.062	0.835	0.9	0.953	0.989
MAP3K7	TRADD	9606.ENSP00000358335	9606.ENSP00000341268	0	0	0	0	0	0.056	0.9	0.46	0.944
MAP3K7	PRKAA1	9606.ENSP00000358335	9606.ENSP00000346148	0	0	0	0.567	0.062	0.537	0.8	0.167	0.911
MAP3K7	PTEN	9606.ENSP00000358335	9606.ENSP00000361021	0	0	0	0	0.062	0.111	0	0.387	0.444
MAP3K7	RELA	9606.ENSP00000358335	9606.ENSP00000384273	0	0	0	0	0.062	0.685	0.65	0.466	0.937
MAP3K7	MAPK8	9606.ENSP00000358335	9606.ENSP00000378974	0	0	0	0.581	0.063	0.661	0.8	0.632	0.948
MAP3K7	TNF	9606.ENSP00000358335	9606.ENSP00000398698	0	0	0	0	0	0.639	0.9	0.548	0.982
MAP3K7	TRAF6	9606.ENSP00000358335	9606.ENSP00000433623	0	0	0	0	0.062	0.994	0.9	0.991	0.999
MAPK1	RHEB	9606.ENSP00000215832	9606.ENSP00000262187	0	0	0	0	0.063	0.163	0	0.322	0.422
MAPK1	STK11	9606.ENSP00000215832	9606.ENSP00000324856	0	0	0.229	0.644	0.062	0.332	0	0.338	0.459
MAPK1	TNF	9606.ENSP00000215832	9606.ENSP00000398698	0	0	0	0	0	0	0	0.538	0.538
MAPK1	PIK3CA	9606.ENSP00000215832	9606.ENSP00000263967	0	0	0	0	0.062	0.114	0	0.561	0.603
MAPK1	SQSTM1	9606.ENSP00000215832	9606.ENSP00000374455	0	0	0	0	0	0.495	0	0.33	0.647
MAPK1	RPTOR	9606.ENSP00000215832	9606.ENSP00000307272	0	0	0	0	0.063	0.487	0	0.34	0.655
MAPK1	MCL1	9606.ENSP00000215832	9606.ENSP00000358022	0	0	0	0	0	0.463	0	0.428	0.68
MAPK1	PTEN	9606.ENSP00000215832	9606.ENSP00000361021	0	0	0	0	0.065	0.188	0	0.708	0.759
MAPK1	PRKACA	9606.ENSP00000215832	9606.ENSP00000309591	0	0	0.357	0.611	0.065	0.18	0.8	0.257	0.867
MAPK1	RPS6KB2	9606.ENSP00000215832	9606.ENSP00000308413	0	0	0.399	0.63	0.062	0.159	0.8	0.323	0.868
MAPK1	TSC1	9606.ENSP00000215832	9606.ENSP00000298552	0	0	0	0	0.042	0	0.9	0.247	0.921
MAPK1	MAPK8	9606.ENSP00000215832	9606.ENSP00000378974	0	0	0.386	0.886	0.081	0.225	0.9	0.735	0.931
MAPK1	PRKACB	9606.ENSP00000215832	9606.ENSP00000359719	0	0	0.346	0.607	0.087	0.18	0.9	0.366	0.938
MAPK1	RELA	9606.ENSP00000215832	9606.ENSP00000384273	0	0	0	0	0	0.118	0.9	0.419	0.944
MAPK1	NFKBIA	9606.ENSP00000215832	9606.ENSP00000216797	0	0	0	0	0	0.134	0.9	0.461	0.949
MAPK1	RPS6KB1	9606.ENSP00000215832	9606.ENSP00000225577	0	0	0.355	0.649	0.062	0.309	0.9	0.594	0.95
MAPK1	TSC2	9606.ENSP00000215832	9606.ENSP00000219476	0	0	0	0	0.053	0.462	0.9	0.441	0.967
MAPK1	RAF1	9606.ENSP00000215832	9606.ENSP00000251849	0	0	0	0.587	0.066	0.846	0.9	0.738	0.989
MAPK1	TP53	9606.ENSP00000215832	9606.ENSP00000269305	0	0	0	0	0.055	0.876	0.8	0.695	0.991
MAPK8	NFKBIA	9606.ENSP00000378974	9606.ENSP00000216797	0	0	0	0	0	0.102	0	0.707	0.726
MAPK8	RPS6KB1	9606.ENSP00000378974	9606.ENSP00000225577	0	0	0.41	0.591	0.078	0.492	0	0.524	0.673
MAPK8	TRAF2	9606.ENSP00000378974	9606.ENSP00000247668	0	0	0	0	0.063	0.292	0.9	0.477	0.96
MAPK8	PIK3C3	9606.ENSP00000378974	9606.ENSP00000262039	0	0	0	0	0.081	0.145	0	0.58	0.641
MAPK8	PIK3CA	9606.ENSP00000378974	9606.ENSP00000263967	0	0	0	0	0.082	0.063	0	0.375	0.416
MAPK8	TP53	9606.ENSP00000378974	9606.ENSP00000269305	0	0	0	0	0	0.884	0.9	0.827	0.997
MAPK8	RPTOR	9606.ENSP00000378974	9606.ENSP00000307272	0	0	0	0	0.113	0.486	0	0.333	0.669
MAPK8	TRADD	9606.ENSP00000378974	9606.ENSP00000341268	0	0	0	0	0.058	0	0	0.46	0.469
MAPK8	MCL1	9606.ENSP00000378974	9606.ENSP00000358022	0	0	0	0	0	0.173	0	0.503	0.571
MAPK8	PTEN	9606.ENSP00000378974	9606.ENSP00000361021	0	0	0	0	0.062	0.154	0	0.557	0.617
MAPK8	SQSTM1	9606.ENSP00000378974	9606.ENSP00000374455	0	0	0	0	0	0	0	0.415	0.415
MAPK8	TNF	9606.ENSP00000378974	9606.ENSP00000398698	0	0	0	0	0.052	0	0	0.696	0.7
MAPK8	RELA	9606.ENSP00000378974	9606.ENSP00000384273	0	0	0	0	0	0	0.8	0.587	0.913
MAPK8	TRAF6	9606.ENSP00000378974	9606.ENSP00000433623	0	0	0	0	0.063	0.236	0.9	0.607	0.968
MCL1	NFKBIA	9606.ENSP00000358022	9606.ENSP00000216797	0	0	0	0	0.16	0.056	0	0.519	0.585
MCL1	TSC2	9606.ENSP00000358022	9606.ENSP00000219476	0	0	0	0	0	0	0	0.402	0.402
MCL1	RPS6KB1	9606.ENSP00000358022	9606.ENSP00000225577	0	0	0	0	0	0	0	0.556	0.556
MCL1	RAF1	9606.ENSP00000358022	9606.ENSP00000251849	0	0	0	0	0	0	0	0.505	0.505
MCL1	RIPK1	9606.ENSP00000358022	9606.ENSP00000259808	0	0	0	0	0.062	0	0	0.392	0.405
MCL1	PIK3C3	9606.ENSP00000358022	9606.ENSP00000262039	0	0	0	0	0	0.104	0	0.42	0.458
MCL1	PIK3CA	9606.ENSP00000358022	9606.ENSP00000263967	0	0	0	0	0.062	0.058	0	0.468	0.488
MCL1	TP53	9606.ENSP00000358022	9606.ENSP00000269305	0	0	0	0	0.051	0.298	0.9	0.944	0.995
MCL1	PMAIP1	9606.ENSP00000358022	9606.ENSP00000326119	0	0	0	0	0	0.978	0	0.989	0.999
MCL1	PRKAA1	9606.ENSP00000358022	9606.ENSP00000346148	0	0	0	0	0	0.746	0	0.092	0.759
MCL1	RELA	9606.ENSP00000358022	9606.ENSP00000384273	0	0	0	0	0.083	0	0	0.414	0.439
MCL1	TNF	9606.ENSP00000358022	9606.ENSP00000398698	0	0	0	0	0.062	0.059	0	0.573	0.59
MCL1	PTEN	9606.ENSP00000358022	9606.ENSP00000361021	0	0	0	0	0	0.076	0	0.64	0.653
MCL1	TRAF6	9606.ENSP00000358022	9606.ENSP00000433623	0	0	0	0	0	0.27	0	0.664	0.744
MRAS	RAF1	9606.ENSP00000289104	9606.ENSP00000251849	0	0	0	0	0	0.726	0.9	0.63	0.989
MRAS	PIK3R3	9606.ENSP00000289104	9606.ENSP00000262741	0	0	0	0	0	0.058	0.8	0.071	0.809
MRAS	PIK3CA	9606.ENSP00000289104	9606.ENSP00000263967	0	0	0	0	0	0.303	0.8	0.153	0.871
MRAS	PIK3CD	9606.ENSP00000289104	9606.ENSP00000366563	0	0	0	0	0	0.151	0.8	0.12	0.837
MTMR14	PIK3C3	9606.ENSP00000296003	9606.ENSP00000262039	0	0	0	0	0.064	0	0.65	0.378	0.778
MTMR14	WIPI1	9606.ENSP00000296003	9606.ENSP00000262139	0	0	0	0	0.049	0	0	0.541	0.545
MTMR14	PIK3R3	9606.ENSP00000296003	9606.ENSP00000262741	0	0	0	0	0.054	0	0.65	0.097	0.674
MTMR14	MTMR4	9606.ENSP00000296003	9606.ENSP00000325285	0	0	0	0	0.088	0	0	0.52	0.543
MTMR4	PIK3C3	9606.ENSP00000325285	9606.ENSP00000262039	0	0	0	0	0.062	0.124	0.65	0.4	0.804
MTMR4	PIK3R3	9606.ENSP00000325285	9606.ENSP00000262741	0	0	0	0	0.062	0	0.65	0.067	0.666
NFKBIA	PMAIP1	9606.ENSP00000216797	9606.ENSP00000326119	0	0	0	0	0	0	0	0.401	0.4
NFKBIA	RPS6KB1	9606.ENSP00000216797	9606.ENSP00000225577	0	0	0	0	0.062	0.103	0	0.463	0.509
NFKBIA	PTEN	9606.ENSP00000216797	9606.ENSP00000361021	0	0	0	0	0.062	0.078	0	0.497	0.527
NFKBIA	TRADD	9606.ENSP00000216797	9606.ENSP00000341268	0	0	0	0	0.069	0	0	0.696	0.705
NFKBIA	PRKACA	9606.ENSP00000216797	9606.ENSP00000309591	0	0	0	0	0.098	0.056	0.8	0.065	0.819
NFKBIA	PRKACB	9606.ENSP00000216797	9606.ENSP00000359719	0	0	0	0	0.098	0.056	0.8	0.1	0.826
NFKBIA	RIPK1	9606.ENSP00000216797	9606.ENSP00000259808	0	0	0	0	0	0.12	0.65	0.604	0.867
NFKBIA	TP53	9606.ENSP00000216797	9606.ENSP00000269305	0	0	0	0	0	0.615	0	0.814	0.925
NFKBIA	PIK3CA	9606.ENSP00000216797	9606.ENSP00000263967	0	0	0	0	0.054	0.133	0.9	0.267	0.931
NFKBIA	SQSTM1	9606.ENSP00000216797	9606.ENSP00000374455	0	0	0	0	0.063	0.056	0.9	0.322	0.932
NFKBIA	TRAF2	9606.ENSP00000216797	9606.ENSP00000247668	0	0	0	0	0.055	0.07	0.9	0.577	0.957
NFKBIA	TRAF6	9606.ENSP00000216797	9606.ENSP00000433623	0	0	0	0	0	0.07	0.9	0.853	0.985
NFKBIA	TNF	9606.ENSP00000216797	9606.ENSP00000398698	0	0	0	0	0.152	0.27	0.9	0.893	0.992
NFKBIA	RELA	9606.ENSP00000216797	9606.ENSP00000384273	0	0.003	0	0	0.085	0.998	0.9	0.989	0.999
NRBF2	PIK3C3	9606.ENSP00000277746	9606.ENSP00000262039	0	0	0	0	0.062	0.871	0.8	0.9	0.997
NRBF2	ULK2	9606.ENSP00000277746	9606.ENSP00000378914	0	0	0	0	0	0	0.6	0.218	0.673
NRBF2	ULK1	9606.ENSP00000277746	9606.ENSP00000324560	0	0	0	0	0	0.286	0.6	0.392	0.811
PIK3C3	SNAP29	9606.ENSP00000262039	9606.ENSP00000215730	0	0	0	0	0	0.058	0	0.655	0.661
PIK3C3	TSC2	9606.ENSP00000262039	9606.ENSP00000219476	0	0	0	0	0.062	0.236	0	0.71	0.774
PIK3C3	RPS6KB1	9606.ENSP00000262039	9606.ENSP00000225577	0	0	0	0	0.062	0.213	0	0.632	0.705
PIK3C3	STX17	9606.ENSP00000262039	9606.ENSP00000259400	0	0	0	0	0.065	0.122	0	0.713	0.744
PIK3C3	RIPK1	9606.ENSP00000262039	9606.ENSP00000259808	0	0	0	0	0.062	0.104	0	0.363	0.418
PIK3C3	RAB1A	9606.ENSP00000262039	9606.ENSP00000387286	0	0	0	0	0.061	0.102	0	0.369	0.422
PIK3C3	TP53	9606.ENSP00000262039	9606.ENSP00000269305	0	0	0	0	0	0.056	0	0.459	0.467
PIK3C3	RRAGD	9606.ENSP00000262039	9606.ENSP00000358423	0	0	0	0	0	0.183	0	0.388	0.478
PIK3C3	TSC1	9606.ENSP00000262039	9606.ENSP00000298552	0	0	0	0	0.065	0.155	0	0.404	0.489
PIK3C3	STK11	9606.ENSP00000262039	9606.ENSP00000324856	0	0	0	0	0.065	0.151	0	0.428	0.506
PIK3C3	RRAGC	9606.ENSP00000262039	9606.ENSP00000362092	0	0	0	0	0	0.183	0	0.464	0.543
PIK3C3	RRAGA	9606.ENSP00000262039	9606.ENSP00000369899	0	0	0	0	0.066	0.223	0	0.481	0.59
PIK3C3	RRAGB	9606.ENSP00000262039	9606.ENSP00000262850	0	0	0	0	0	0.223	0	0.503	0.597
PIK3C3	PIK3CD	9606.ENSP00000262039	9606.ENSP00000366563	0	0	0	0.639	0.062	0	0.54	0.513	0.63
PIK3C3	VMP1	9606.ENSP00000262039	9606.ENSP00000262291	0	0	0	0	0.062	0.27	0	0.667	0.752
PIK3C3	PIK3CA	9606.ENSP00000262039	9606.ENSP00000263967	0	0	0	0.648	0.065	0	0.72	0.507	0.773
PIK3C3	SH3GLB1	9606.ENSP00000262039	9606.ENSP00000479919	0	0	0	0	0.063	0.27	0	0.707	0.782
PIK3C3	RHEB	9606.ENSP00000262039	9606.ENSP00000262187	0	0	0	0	0	0.151	0	0.776	0.802
PIK3C3	SQSTM1	9606.ENSP00000262039	9606.ENSP00000374455	0	0	0	0	0.062	0	0	0.807	0.811
PIK3C3	RPTOR	9606.ENSP00000262039	9606.ENSP00000307272	0	0	0	0	0.272	0.332	0	0.752	0.869
PIK3C3	PIK3R3	9606.ENSP00000262039	9606.ENSP00000262741	0	0	0	0	0	0.244	0.8	0.365	0.895
PIK3C3	PRKAA1	9606.ENSP00000262039	9606.ENSP00000346148	0	0	0	0	0.066	0.131	0.9	0.339	0.939
PIK3C3	WIPI1	9606.ENSP00000262039	9606.ENSP00000262139	0	0	0	0	0.107	0	0	0.944	0.948
PIK3C3	ULK2	9606.ENSP00000262039	9606.ENSP00000378914	0	0	0	0	0.079	0.179	0.6	0.888	0.961
PIK3C3	PTEN	9606.ENSP00000262039	9606.ENSP00000361021	0	0	0	0	0.073	0.144	0.9	0.639	0.967
PIK3C3	ULK1	9606.ENSP00000262039	9606.ENSP00000324560	0	0	0	0	0.079	0.179	0.9	0.963	0.996
PIK3CA	TSC2	9606.ENSP00000263967	9606.ENSP00000219476	0	0	0	0	0.062	0.236	0	0.68	0.75
PIK3CA	RPS6KB1	9606.ENSP00000263967	9606.ENSP00000225577	0	0	0	0	0.065	0.354	0.9	0.809	0.986
PIK3CA	RRAS	9606.ENSP00000263967	9606.ENSP00000246792	0	0	0	0	0	0.182	0.8	0.356	0.885
PIK3CA	TRAF2	9606.ENSP00000263967	9606.ENSP00000247668	0	0	0	0	0.063	0.056	0.8	0.053	0.81
PIK3CA	RAF1	9606.ENSP00000263967	9606.ENSP00000251849	0	0	0	0	0.062	0.104	0.8	0.55	0.914
PIK3CA	RHEB	9606.ENSP00000263967	9606.ENSP00000262187	0	0	0	0	0.054	0.151	0	0.55	0.607
PIK3CA	PIK3R3	9606.ENSP00000263967	9606.ENSP00000262741	0	0	0	0	0.064	0.941	0.8	0.971	0.999
PIK3CA	PRKAA1	9606.ENSP00000263967	9606.ENSP00000346148	0	0	0	0	0.063	0.131	0	0.328	0.405
PIK3CA	TSC1	9606.ENSP00000263967	9606.ENSP00000298552	0	0	0	0	0.062	0.155	0	0.451	0.527
PIK3CA	RPS6KB2	9606.ENSP00000263967	9606.ENSP00000308413	0	0	0	0	0.063	0.213	0	0.469	0.574
PIK3CA	RPTOR	9606.ENSP00000263967	9606.ENSP00000307272	0	0	0	0	0.145	0.332	0	0.589	0.744
PIK3CA	STK11	9606.ENSP00000263967	9606.ENSP00000324856	0	0	0	0	0.083	0.21	0	0.716	0.776
PIK3CA	PIK3CD	9606.ENSP00000263967	9606.ENSP00000366563	0	0	0	0.892	0.062	0	0.8	0.878	0.822
PIK3CA	TP53	9606.ENSP00000263967	9606.ENSP00000269305	0	0	0	0	0	0.281	0	0.872	0.904
PIK3CA	TRAF6	9606.ENSP00000263967	9606.ENSP00000433623	0	0	0	0	0.063	0.281	0.9	0.126	0.933
PIK3CA	RELA	9606.ENSP00000263967	9606.ENSP00000384273	0	0	0	0	0	0.27	0.9	0.313	0.945
PIK3CA	PTEN	9606.ENSP00000263967	9606.ENSP00000361021	0	0	0	0	0.066	0.347	0.9	0.931	0.995
PIK3CD	TSC2	9606.ENSP00000366563	9606.ENSP00000219476	0	0	0	0	0.062	0.236	0	0.465	0.583
PIK3CD	RPS6KB1	9606.ENSP00000366563	9606.ENSP00000225577	0	0	0	0	0.054	0.213	0	0.562	0.646
PIK3CD	RRAS	9606.ENSP00000366563	9606.ENSP00000246792	0	0	0	0	0.062	0.182	0.8	0.448	0.904
PIK3CD	TRAF2	9606.ENSP00000366563	9606.ENSP00000247668	0	0	0	0	0.063	0.056	0.8	0.073	0.814
PIK3CD	RAF1	9606.ENSP00000366563	9606.ENSP00000251849	0	0	0	0	0.062	0.104	0.8	0.244	0.856
PIK3CD	RHEB	9606.ENSP00000366563	9606.ENSP00000262187	0	0	0	0	0.054	0.151	0	0.467	0.535
PIK3CD	PIK3R3	9606.ENSP00000366563	9606.ENSP00000262741	0	0	0	0	0.064	0.606	0.8	0.82	0.984
PIK3CD	RPTOR	9606.ENSP00000366563	9606.ENSP00000307272	0	0	0	0	0.145	0.332	0	0.483	0.679
PIK3CD	RPS6KB2	9606.ENSP00000366563	9606.ENSP00000308413	0	0	0	0	0.054	0.213	0	0.287	0.423
PIK3CD	PTEN	9606.ENSP00000366563	9606.ENSP00000361021	0	0	0	0	0.066	0.347	0.9	0.808	0.986
PIK3R3	SNAP29	9606.ENSP00000262741	9606.ENSP00000215730	0	0	0	0	0	0	0	0.439	0.439
PIK3R3	RPS6KB1	9606.ENSP00000262741	9606.ENSP00000225577	0	0	0	0	0.065	0	0	0.389	0.404
PIK3R3	RRAS	9606.ENSP00000262741	9606.ENSP00000246792	0	0	0	0	0	0.058	0.8	0.174	0.83
PIK3R3	TRAF2	9606.ENSP00000262741	9606.ENSP00000247668	0	0	0	0	0	0	0.8	0	0.8
PIK3R3	RAF1	9606.ENSP00000262741	9606.ENSP00000251849	0	0	0	0	0	0.102	0.8	0.119	0.828
PIK3R3	TP53	9606.ENSP00000262741	9606.ENSP00000269305	0	0	0	0	0	0.27	0	0.323	0.484
PIK3R3	RPS6KB2	9606.ENSP00000262741	9606.ENSP00000308413	0	0	0	0	0.065	0	0	0.517	0.529
PIK3R3	PTEN	9606.ENSP00000262741	9606.ENSP00000361021	0	0	0	0	0.065	0.136	0.9	0.627	0.965
PMAIP1	TP53	9606.ENSP00000326119	9606.ENSP00000269305	0	0	0	0	0	0.175	0.9	0.814	0.983
PMAIP1	TNF	9606.ENSP00000326119	9606.ENSP00000398698	0	0	0	0	0.057	0	0	0.43	0.44
PMAIP1	PTEN	9606.ENSP00000326119	9606.ENSP00000361021	0	0	0	0	0	0	0	0.468	0.468
PRF1	TNF	9606.ENSP00000398568	9606.ENSP00000398698	0	0	0	0	0.098	0	0	0.785	0.798
PRKAA1	TSC2	9606.ENSP00000346148	9606.ENSP00000219476	0	0	0	0	0.062	0.683	0.9	0.585	0.986
PRKAA1	RPS6KB1	9606.ENSP00000346148	9606.ENSP00000225577	0	0	0.371	0.609	0.107	0.181	0	0.606	0.492
PRKAA1	RHEB	9606.ENSP00000346148	9606.ENSP00000262187	0	0	0	0	0.062	0.145	0.9	0.438	0.948
PRKAA1	RRAGB	9606.ENSP00000346148	9606.ENSP00000262850	0	0.001	0	0	0	0.06	0.9	0.292	0.927
PRKAA1	TP53	9606.ENSP00000346148	9606.ENSP00000269305	0	0	0	0	0	0.281	0.9	0.384	0.951
PRKAA1	TSC1	9606.ENSP00000346148	9606.ENSP00000298552	0	0	0	0	0	0.145	0.9	0.247	0.93
PRKAA1	RPTOR	9606.ENSP00000346148	9606.ENSP00000307272	0	0	0	0	0.064	0.376	0.9	0.618	0.974
PRKAA1	PRKACA	9606.ENSP00000346148	9606.ENSP00000309591	0	0	0.333	0.776	0.103	0.143	0.8	0.252	0.851
PRKAA1	ULK1	9606.ENSP00000346148	9606.ENSP00000324560	0	0	0	0.613	0.062	0.762	0.6	0.471	0.919
PRKAA1	STK11	9606.ENSP00000346148	9606.ENSP00000324856	0	0	0.229	0.739	0	0.755	0.9	0.75	0.98
PRKAA1	PTEN	9606.ENSP00000346148	9606.ENSP00000361021	0	0	0	0	0.062	0.171	0	0.558	0.626
PRKAA1	PRKACB	9606.ENSP00000346148	9606.ENSP00000359719	0	0	0.289	0.736	0.103	0.143	0.8	0.367	0.858
PRKAA1	RRAGC	9606.ENSP00000346148	9606.ENSP00000362092	0	0	0	0	0.062	0	0.9	0.107	0.908
PRKAA1	RRAGD	9606.ENSP00000346148	9606.ENSP00000358423	0	0	0	0	0.062	0	0.9	0.107	0.908
PRKAA1	RRAGA	9606.ENSP00000346148	9606.ENSP00000369899	0	0.002	0	0	0	0.06	0.9	0.288	0.927
PRKACA	RPS6KB1	9606.ENSP00000309591	9606.ENSP00000225577	0	0	0.401	0.874	0.062	0.295	0.8	0.465	0.87
PRKACA	RAF1	9606.ENSP00000309591	9606.ENSP00000251849	0	0	0	0.587	0.063	0.262	0.8	0.059	0.85
PRKACA	RPS6KB2	9606.ENSP00000309591	9606.ENSP00000308413	0	0	0.423	0.881	0.062	0.295	0.8	0.206	0.865
PRKACA	ULK2	9606.ENSP00000309591	9606.ENSP00000378914	0	0	0	0.712	0.065	0.115	0.8	0.101	0.823
PRKACA	ULK1	9606.ENSP00000309591	9606.ENSP00000324560	0	0	0	0.718	0.099	0.115	0.8	0.115	0.83
PRKACA	STK11	9606.ENSP00000309591	9606.ENSP00000324856	0	0	0.249	0.701	0.103	0.296	0.9	0.108	0.937
PRKACA	RELA	9606.ENSP00000309591	9606.ENSP00000384273	0	0	0	0	0.069	0.767	0.9	0.043	0.976
PRKACA	PRKACB	9606.ENSP00000309591	9606.ENSP00000359719	0	0	0.446	0.984	0.062	0.784	0.9	0.768	0.978
PRKACB	RPS6KB1	9606.ENSP00000359719	9606.ENSP00000225577	0	0	0.401	0.848	0.062	0.295	0.8	0.339	0.87
PRKACB	RAF1	9606.ENSP00000359719	9606.ENSP00000251849	0	0	0	0.578	0.063	0.101	0.8	0.15	0.825
PRKACB	TP53	9606.ENSP00000359719	9606.ENSP00000269305	0	0	0	0	0	0	0	0.444	0.444
PRKACB	RPS6KB2	9606.ENSP00000359719	9606.ENSP00000308413	0	0	0.41	0.852	0.062	0.295	0.8	0.212	0.867
PRKACB	ULK1	9606.ENSP00000359719	9606.ENSP00000324560	0	0	0	0.69	0.065	0.115	0.8	0.101	0.823
PRKACB	TRAF6	9606.ENSP00000359719	9606.ENSP00000433623	0	0	0	0	0.062	0.27	0	0.208	0.41
PRKACB	ULK2	9606.ENSP00000359719	9606.ENSP00000378914	0	0	0	0.689	0.065	0.115	0.8	0.101	0.823
PRKACB	RELA	9606.ENSP00000359719	9606.ENSP00000384273	0	0	0	0	0	0	0.9	0.106	0.906
PTEN	TSC2	9606.ENSP00000361021	9606.ENSP00000219476	0	0	0	0	0	0	0	0.909	0.909
PTEN	RPS6KB1	9606.ENSP00000361021	9606.ENSP00000225577	0	0	0	0	0.063	0.17	0	0.918	0.931
PTEN	RAF1	9606.ENSP00000361021	9606.ENSP00000251849	0	0	0	0	0.072	0.111	0	0.688	0.72
PTEN	RHEB	9606.ENSP00000361021	9606.ENSP00000262187	0	0	0	0	0.062	0.288	0	0.863	0.9
PTEN	RRAGB	9606.ENSP00000361021	9606.ENSP00000262850	0	0	0	0	0.063	0	0	0.415	0.429
PTEN	TP53	9606.ENSP00000361021	9606.ENSP00000269305	0	0	0	0	0	0.851	0.9	0.986	0.999
PTEN	TSC1	9606.ENSP00000361021	9606.ENSP00000298552	0	0	0	0	0	0.288	0	0.817	0.864
PTEN	RPTOR	9606.ENSP00000361021	9606.ENSP00000307272	0	0	0	0	0.064	0.27	0	0.812	0.86
PTEN	RPS6KB2	9606.ENSP00000361021	9606.ENSP00000308413	0	0	0	0	0.062	0.17	0	0.623	0.681
PTEN	ULK1	9606.ENSP00000361021	9606.ENSP00000324560	0	0	0	0	0.061	0.145	0	0.512	0.574
PTEN	STK11	9606.ENSP00000361021	9606.ENSP00000324856	0	0	0	0	0.062	0.347	0	0.922	0.948
PTEN	RELA	9606.ENSP00000361021	9606.ENSP00000384273	0	0	0	0	0	0	0	0.451	0.451
PTEN	SQSTM1	9606.ENSP00000361021	9606.ENSP00000374455	0	0	0	0	0	0	0	0.461	0.461
PTEN	TRAF6	9606.ENSP00000361021	9606.ENSP00000433623	0	0	0	0	0.062	0.057	0	0.454	0.475
PTEN	RRAGA	9606.ENSP00000361021	9606.ENSP00000369899	0	0	0	0	0.063	0	0	0.463	0.476
PTEN	ULK2	9606.ENSP00000361021	9606.ENSP00000378914	0	0	0	0	0.062	0.145	0	0.402	0.478
PTEN	TNF	9606.ENSP00000361021	9606.ENSP00000398698	0	0	0	0	0	0	0	0.623	0.623
RAB1A	RRAGB	9606.ENSP00000387286	9606.ENSP00000262850	0	0	0	0	0.096	0	0	0.402	0.436
RAB1A	WDR41	9606.ENSP00000387286	9606.ENSP00000296679	0	0	0	0	0	0	0	0.514	0.514
RAB1A	RAB8A	9606.ENSP00000387286	9606.ENSP00000300935	0	0	0.445	0.951	0.143	0.897	0	0.807	0.913
RAB1A	RPTOR	9606.ENSP00000387286	9606.ENSP00000307272	0	0	0	0	0	0.27	0	0.262	0.438
RAB1A	ULK1	9606.ENSP00000387286	9606.ENSP00000324560	0	0	0	0	0	0.317	0	0.952	0.966
RAB1A	SPTAN1	9606.ENSP00000387286	9606.ENSP00000361824	0	0	0	0	0	0	0.6	0.085	0.618
RAB1A	RRAGC	9606.ENSP00000387286	9606.ENSP00000362092	0	0	0	0	0.067	0	0	0.391	0.408
RAB1A	RRAGA	9606.ENSP00000387286	9606.ENSP00000369899	0	0	0	0	0.236	0	0	0.288	0.433
RAB1A	ULK2	9606.ENSP00000387286	9606.ENSP00000378914	0	0	0	0	0	0.103	0	0.377	0.417
RAB8A	SNAP29	9606.ENSP00000300935	9606.ENSP00000215730	0	0	0	0	0.062	0.343	0	0.427	0.616
RAB8A	WDR41	9606.ENSP00000300935	9606.ENSP00000296679	0	0	0	0	0	0	0.8	0.636	0.924
RAB8A	TSC1	9606.ENSP00000300935	9606.ENSP00000298552	0	0	0	0	0	0.436	0	0.102	0.471
RAB8A	SQSTM1	9606.ENSP00000300935	9606.ENSP00000374455	0	0	0	0	0.049	0	0.8	0.267	0.848
RAF1	TSC2	9606.ENSP00000251849	9606.ENSP00000219476	0	0	0	0	0.113	0.058	0	0.484	0.532
RAF1	RRAS	9606.ENSP00000251849	9606.ENSP00000246792	0	0	0	0	0.062	0.551	0.9	0.403	0.971
RAF1	RPTOR	9606.ENSP00000251849	9606.ENSP00000307272	0	0	0	0	0.076	0.067	0	0.382	0.42
RAF1	TP53	9606.ENSP00000251849	9606.ENSP00000269305	0	0	0	0	0	0.056	0	0.6	0.607
RAF1	RELA	9606.ENSP00000251849	9606.ENSP00000384273	0	0	0	0	0.112	0.056	0.8	0.181	0.844
RAF1	RHEB	9606.ENSP00000251849	9606.ENSP00000262187	0	0	0	0	0	0.79	0	0.549	0.901
RELA	TRAF2	9606.ENSP00000384273	9606.ENSP00000247668	0	0	0	0	0.068	0	0.9	0.484	0.947
RELA	RIPK1	9606.ENSP00000384273	9606.ENSP00000259808	0	0	0	0	0.062	0.056	0.9	0.507	0.95
RELA	TP53	9606.ENSP00000384273	9606.ENSP00000269305	0	0	0	0	0.062	0.451	0	0.964	0.98
RELA	TRADD	9606.ENSP00000384273	9606.ENSP00000341268	0	0	0	0	0.088	0	0.9	0.508	0.951
RELA	SQSTM1	9606.ENSP00000384273	9606.ENSP00000374455	0	0	0	0	0.065	0.118	0.9	0.324	0.936
RELA	TRAF6	9606.ENSP00000384273	9606.ENSP00000433623	0	0	0	0	0	0	0.9	0.629	0.961
RELA	TNF	9606.ENSP00000384273	9606.ENSP00000398698	0	0	0	0	0	0.501	0.9	0.824	0.99
RHEB	TSC2	9606.ENSP00000262187	9606.ENSP00000219476	0	0	0	0	0.062	0.971	0.9	0.994	0.999
RHEB	RPS6KB1	9606.ENSP00000262187	9606.ENSP00000225577	0	0	0	0	0	0.518	0.9	0.898	0.994
RHEB	TNF	9606.ENSP00000262187	9606.ENSP00000398698	0	0	0	0	0	0.273	0	0.253	0.433
RHEB	TP53	9606.ENSP00000262187	9606.ENSP00000269305	0	0	0	0	0	0	0	0.463	0.463
RHEB	SQSTM1	9606.ENSP00000262187	9606.ENSP00000374455	0	0	0	0	0.063	0.06	0	0.473	0.495
RHEB	ULK2	9606.ENSP00000262187	9606.ENSP00000378914	0	0	0	0	0	0.251	0	0.578	0.67
RHEB	STK11	9606.ENSP00000262187	9606.ENSP00000324856	0	0	0	0	0.065	0.127	0	0.732	0.762
RHEB	RPS6KB2	9606.ENSP00000262187	9606.ENSP00000308413	0	0	0	0	0	0.368	0	0.77	0.848
RHEB	ULK1	9606.ENSP00000262187	9606.ENSP00000324560	0	0	0	0	0	0.251	0.6	0.718	0.908
RHEB	RRAGD	9606.ENSP00000262187	9606.ENSP00000358423	0	0	0	0	0.062	0.142	0.6	0.834	0.939
RHEB	RRAGB	9606.ENSP00000262187	9606.ENSP00000262850	0	0	0	0	0.108	0.056	0.6	0.886	0.956
RHEB	RRAGC	9606.ENSP00000262187	9606.ENSP00000362092	0	0	0	0	0.062	0.142	0.6	0.905	0.965
RHEB	RRAGA	9606.ENSP00000262187	9606.ENSP00000369899	0	0	0	0	0.141	0.056	0.6	0.911	0.967
RHEB	TSC1	9606.ENSP00000262187	9606.ENSP00000298552	0	0	0	0	0.062	0.833	0.9	0.985	0.999
RHEB	RPTOR	9606.ENSP00000262187	9606.ENSP00000307272	0	0	0	0	0.064	0.952	0.9	0.995	0.999
RIPK1	TRAF2	9606.ENSP00000259808	9606.ENSP00000247668	0	0	0	0	0.062	0.921	0.9	0.988	0.999
RIPK1	TP53	9606.ENSP00000259808	9606.ENSP00000269305	0	0	0	0	0	0.056	0	0.581	0.588
RIPK1	SQSTM1	9606.ENSP00000259808	9606.ENSP00000374455	0	0	0	0	0	0.519	0.9	0.836	0.991
RIPK1	TRAF6	9606.ENSP00000259808	9606.ENSP00000433623	0	0	0	0	0.064	0.182	0.9	0.945	0.995
RIPK1	TNF	9606.ENSP00000259808	9606.ENSP00000398698	0	0	0	0	0.062	0.935	0.9	0.817	0.998
RIPK1	TRADD	9606.ENSP00000259808	9606.ENSP00000341268	0	0	0	0	0.069	0.881	0.9	0.989	0.999
RPS6KB1	TSC2	9606.ENSP00000225577	9606.ENSP00000219476	0	0	0	0	0.056	0.369	0	0.929	0.954
RPS6KB1	TNF	9606.ENSP00000225577	9606.ENSP00000398698	0	0	0	0	0	0	0	0.582	0.583
RPS6KB1	TP53	9606.ENSP00000225577	9606.ENSP00000269305	0	0	0	0	0	0	0	0.681	0.681
RPS6KB1	SQSTM1	9606.ENSP00000225577	9606.ENSP00000374455	0	0	0	0	0	0.27	0	0.624	0.714
RPS6KB1	STK11	9606.ENSP00000225577	9606.ENSP00000324856	0	0	0.216	0.631	0.063	0.64	0	0.73	0.759
RPS6KB1	RPS6KB2	9606.ENSP00000225577	9606.ENSP00000308413	0	0	0.439	0.971	0	0	0.8	0.802	0.806
RPS6KB1	TSC1	9606.ENSP00000225577	9606.ENSP00000298552	0	0	0	0	0	0.248	0	0.831	0.867
RPS6KB1	RRAGD	9606.ENSP00000225577	9606.ENSP00000358423	0	0	0	0	0	0	0.9	0.659	0.964
RPS6KB1	RRAGC	9606.ENSP00000225577	9606.ENSP00000362092	0	0	0	0	0	0	0.9	0.656	0.964
RPS6KB1	RRAGB	9606.ENSP00000225577	9606.ENSP00000262850	0	0	0	0	0	0.074	0.9	0.721	0.971
RPS6KB1	RRAGA	9606.ENSP00000225577	9606.ENSP00000369899	0	0	0	0	0	0.074	0.9	0.719	0.971
RPS6KB1	RPTOR	9606.ENSP00000225577	9606.ENSP00000307272	0	0	0	0	0.126	0.906	0.9	0.994	0.999
RPS6KB2	TSC2	9606.ENSP00000308413	9606.ENSP00000219476	0	0	0	0	0.062	0.369	0	0.726	0.823
RPS6KB2	RRAGB	9606.ENSP00000308413	9606.ENSP00000262850	0	0	0	0	0	0.074	0	0.496	0.513
RPS6KB2	TSC1	9606.ENSP00000308413	9606.ENSP00000298552	0	0	0	0	0	0.248	0	0.665	0.737
RPS6KB2	RPTOR	9606.ENSP00000308413	9606.ENSP00000307272	0	0	0	0	0.126	0.243	0.8	0.886	0.982
RPS6KB2	RRAGA	9606.ENSP00000308413	9606.ENSP00000369899	0	0	0	0	0	0.074	0	0.481	0.499
RPTOR	TSC2	9606.ENSP00000307272	9606.ENSP00000219476	0	0	0	0	0.063	0	0.9	0.945	0.994
RPTOR	WIPI1	9606.ENSP00000307272	9606.ENSP00000262139	0	0	0	0	0.22	0	0	0.529	0.617
RPTOR	RRAGB	9606.ENSP00000307272	9606.ENSP00000262850	0	0	0	0	0.055	0.889	0.9	0.993	0.999
RPTOR	TP53	9606.ENSP00000307272	9606.ENSP00000269305	0	0	0	0	0	0	0	0.522	0.522
RPTOR	TSC1	9606.ENSP00000307272	9606.ENSP00000298552	0	0	0	0	0.062	0.078	0.9	0.892	0.989
RPTOR	TRAF6	9606.ENSP00000307272	9606.ENSP00000433623	0	0	0	0	0	0.345	0	0.518	0.671
RPTOR	STK11	9606.ENSP00000307272	9606.ENSP00000324856	0	0	0	0	0.065	0.181	0	0.754	0.795
RPTOR	ULK2	9606.ENSP00000307272	9606.ENSP00000378914	0	0	0	0	0.064	0.27	0.9	0.561	0.966
RPTOR	SQSTM1	9606.ENSP00000307272	9606.ENSP00000374455	0	0	0	0	0.062	0.486	0	0.973	0.986
RPTOR	ULK1	9606.ENSP00000307272	9606.ENSP00000324560	0	0	0	0	0.064	0.835	0.9	0.8	0.996
RPTOR	RRAGC	9606.ENSP00000307272	9606.ENSP00000362092	0	0	0	0	0.075	0.998	0.9	0.993	0.999
RPTOR	RRAGD	9606.ENSP00000307272	9606.ENSP00000358423	0	0	0	0	0.049	0.856	0.9	0.974	0.999
RPTOR	RRAGA	9606.ENSP00000307272	9606.ENSP00000369899	0	0	0	0	0.059	0.999	0.9	0.994	0.999
RRAGA	TSC2	9606.ENSP00000369899	9606.ENSP00000219476	0	0	0	0	0	0.661	0.9	0.832	0.993
RRAGA	RRAGB	9606.ENSP00000369899	9606.ENSP00000262850	0	0	0	0.986	0	0.913	0.9	0.89	0.991
RRAGA	TSC1	9606.ENSP00000369899	9606.ENSP00000298552	0	0	0	0	0	0.27	0.9	0.636	0.971
RRAGA	ULK1	9606.ENSP00000369899	9606.ENSP00000324560	0	0	0	0	0	0	0.6	0.431	0.762
RRAGA	STK11	9606.ENSP00000369899	9606.ENSP00000324856	0	0	0	0	0	0.06	0	0.442	0.453
RRAGA	RRAGD	9606.ENSP00000369899	9606.ENSP00000358423	0	0	0	0.619	0.092	0.996	0.9	0.949	0.999
RRAGA	RRAGC	9606.ENSP00000369899	9606.ENSP00000362092	0	0	0	0.628	0.116	0.999	0.9	0.993	0.999
RRAGB	TSC2	9606.ENSP00000262850	9606.ENSP00000219476	0	0	0	0	0	0.518	0.9	0.831	0.991
RRAGB	SQSTM1	9606.ENSP00000262850	9606.ENSP00000374455	0	0	0	0	0	0.27	0	0.247	0.426
RRAGB	STK11	9606.ENSP00000262850	9606.ENSP00000324856	0	0	0	0	0	0.06	0	0.44	0.451
RRAGB	ULK1	9606.ENSP00000262850	9606.ENSP00000324560	0	0	0	0	0	0	0.6	0.42	0.758
RRAGB	TSC1	9606.ENSP00000262850	9606.ENSP00000298552	0	0	0	0	0	0	0.9	0.657	0.964
RRAGB	RRAGD	9606.ENSP00000262850	9606.ENSP00000358423	0	0	0	0.601	0.092	0.952	0.9	0.986	0.997
RRAGB	RRAGC	9606.ENSP00000262850	9606.ENSP00000362092	0	0	0	0.599	0.092	0.996	0.9	0.993	0.999
RRAGC	TSC2	9606.ENSP00000362092	9606.ENSP00000219476	0	0	0	0	0	0.424	0.9	0.821	0.988
RRAGC	WDR41	9606.ENSP00000362092	9606.ENSP00000296679	0	0	0	0	0	0	0	0.747	0.747
RRAGC	TSC1	9606.ENSP00000362092	9606.ENSP00000298552	0	0	0	0	0	0.27	0.9	0.614	0.969
RRAGC	ULK1	9606.ENSP00000362092	9606.ENSP00000324560	0	0	0	0	0.065	0	0.6	0.416	0.762
RRAGC	RRAGD	9606.ENSP00000362092	9606.ENSP00000358423	0	0	0	0.976	0	0.27	0.9	0.937	0.925
RRAGC	SQSTM1	9606.ENSP00000362092	9606.ENSP00000374455	0	0	0	0	0	0.366	0	0.622	0.751
RRAGD	TSC2	9606.ENSP00000358423	9606.ENSP00000219476	0	0	0	0	0	0.424	0.9	0.628	0.976
RRAGD	WDR41	9606.ENSP00000358423	9606.ENSP00000296679	0	0	0	0	0	0	0	0.602	0.602
RRAGD	TSC1	9606.ENSP00000358423	9606.ENSP00000298552	0	0	0	0	0	0	0.9	0.51	0.948
RRAGD	ULK1	9606.ENSP00000358423	9606.ENSP00000324560	0	0	0	0	0.065	0	0.6	0.311	0.72
RRAGD	SQSTM1	9606.ENSP00000358423	9606.ENSP00000374455	0	0	0	0	0	0.168	0	0.367	0.451
SH3GLB1	WIPI1	9606.ENSP00000479919	9606.ENSP00000262139	0	0	0	0	0	0	0	0.457	0.457
SH3GLB1	VMP1	9606.ENSP00000479919	9606.ENSP00000262291	0	0	0	0	0.097	0	0	0.364	0.401
SH3GLB1	ULK1	9606.ENSP00000479919	9606.ENSP00000324560	0	0	0	0	0	0	0	0.512	0.512
SH3GLB1	SQSTM1	9606.ENSP00000479919	9606.ENSP00000374455	0	0	0	0	0	0.059	0	0.406	0.417
SH3GLB1	ULK2	9606.ENSP00000479919	9606.ENSP00000378914	0	0	0	0	0.062	0	0	0.418	0.431
SNAP29	SQSTM1	9606.ENSP00000215730	9606.ENSP00000374455	0	0	0	0	0	0	0	0.43	0.43
SNAP29	WIPI1	9606.ENSP00000215730	9606.ENSP00000262139	0	0	0	0	0.062	0	0	0.455	0.467
SNAP29	ULK1	9606.ENSP00000215730	9606.ENSP00000324560	0	0	0	0	0	0	0	0.506	0.506
SNAP29	STX17	9606.ENSP00000215730	9606.ENSP00000259400	0	0	0	0	0.058	0.995	0.9	0.994	0.999
SPTAN1	TUBA1A	9606.ENSP00000361824	9606.ENSP00000301071	0	0	0	0	0.062	0	0	0.418	0.43
SQSTM1	TSC2	9606.ENSP00000374455	9606.ENSP00000219476	0	0	0	0	0.062	0	0	0.522	0.532
SQSTM1	TRAF2	9606.ENSP00000374455	9606.ENSP00000247668	0	0	0	0	0	0.104	0.9	0.153	0.917
SQSTM1	STX17	9606.ENSP00000374455	9606.ENSP00000259400	0	0	0	0	0.062	0	0	0.627	0.635
SQSTM1	WIPI1	9606.ENSP00000374455	9606.ENSP00000262139	0	0	0	0	0.067	0.255	0	0.673	0.753
SQSTM1	VMP1	9606.ENSP00000374455	9606.ENSP00000262291	0	0	0	0	0	0	0	0.482	0.482
SQSTM1	TP53	9606.ENSP00000374455	9606.ENSP00000269305	0	0	0	0	0	0.646	0	0.525	0.824
SQSTM1	WDR41	9606.ENSP00000374455	9606.ENSP00000296679	0	0	0	0	0	0	0	0.417	0.417
SQSTM1	ULK1	9606.ENSP00000374455	9606.ENSP00000324560	0	0	0	0	0.108	0.76	0	0.792	0.951
SQSTM1	TRADD	9606.ENSP00000374455	9606.ENSP00000341268	0	0	0	0	0.07	0	0.9	0.135	0.912
SQSTM1	ULK2	9606.ENSP00000374455	9606.ENSP00000378914	0	0	0	0	0.108	0.285	0	0.657	0.762
SQSTM1	TNF	9606.ENSP00000374455	9606.ENSP00000398698	0	0	0	0	0	0	0.9	0.445	0.942
SQSTM1	TRAF6	9606.ENSP00000374455	9606.ENSP00000433623	0	0	0	0	0	0.919	0.9	0.99	0.999
STK11	TSC2	9606.ENSP00000324856	9606.ENSP00000219476	0	0	0	0	0	0.056	0	0.865	0.867
STK11	TP53	9606.ENSP00000324856	9606.ENSP00000269305	0	0	0	0	0	0.688	0.6	0.942	0.992
STK11	TSC1	9606.ENSP00000324856	9606.ENSP00000298552	0	0	0	0	0	0.081	0	0.673	0.687
STX17	VMP1	9606.ENSP00000259400	9606.ENSP00000262291	0	0	0	0	0.087	0	0	0.427	0.454
STX17	ULK2	9606.ENSP00000259400	9606.ENSP00000378914	0	0	0	0	0	0.076	0	0.511	0.529
STX17	WIPI1	9606.ENSP00000259400	9606.ENSP00000262139	0	0	0	0	0.058	0.146	0	0.531	0.59
STX17	ULK1	9606.ENSP00000259400	9606.ENSP00000324560	0	0	0	0	0	0.076	0	0.64	0.654
TNF	TRAF2	9606.ENSP00000398698	9606.ENSP00000247668	0	0	0	0	0.066	0.897	0.9	0.854	0.998
TNF	TP53	9606.ENSP00000398698	9606.ENSP00000269305	0	0	0	0	0	0	0	0.784	0.784
TNF	TRADD	9606.ENSP00000398698	9606.ENSP00000341268	0	0	0	0	0.07	0.9	0.9	0.993	0.999
TNF	TRAF6	9606.ENSP00000398698	9606.ENSP00000433623	0	0	0	0	0	0.27	0.9	0.875	0.99
TP53	TSC2	9606.ENSP00000269305	9606.ENSP00000219476	0	0	0	0	0	0.121	0	0.68	0.706
TP53	ULK2	9606.ENSP00000269305	9606.ENSP00000378914	0	0	0	0	0	0	0	0.401	0.401
TP53	ULK1	9606.ENSP00000269305	9606.ENSP00000324560	0	0	0	0	0	0	0	0.456	0.456
TP53	TRADD	9606.ENSP00000269305	9606.ENSP00000341268	0	0	0	0	0.062	0	0	0.457	0.468
TP53	TRAF6	9606.ENSP00000269305	9606.ENSP00000433623	0	0	0	0	0	0.27	0.9	0.679	0.974
TP53INP2	VMP1	9606.ENSP00000363943	9606.ENSP00000262291	0	0	0	0	0	0	0.8	0.716	0.94
TP53INP2	TRAF6	9606.ENSP00000363943	9606.ENSP00000433623	0	0	0	0	0	0	0	0.649	0.649
TRADD	TRAF2	9606.ENSP00000341268	9606.ENSP00000247668	0	0	0	0	0.062	0.98	0.9	0.99	0.999
TRADD	TRAF6	9606.ENSP00000341268	9606.ENSP00000433623	0	0	0	0	0	0.27	0.9	0.859	0.988
TRAF2	TRAF6	9606.ENSP00000247668	9606.ENSP00000433623	0	0	0	0.735	0	0.872	0.9	0.704	0.989
TRAF6	ULK1	9606.ENSP00000433623	9606.ENSP00000324560	0	0	0	0	0	0.27	0.8	0.336	0.894
TRAF6	ULK2	9606.ENSP00000433623	9606.ENSP00000378914	0	0	0	0	0	0	0.8	0.205	0.834
TSC1	TSC2	9606.ENSP00000298552	9606.ENSP00000219476	0	0	0	0	0.095	0.98	0.9	0.995	0.999
TSC1	ULK1	9606.ENSP00000298552	9606.ENSP00000324560	0	0	0	0	0	0	0	0.513	0.513
TSC2	ULK2	9606.ENSP00000219476	9606.ENSP00000378914	0	0	0	0	0.063	0.145	0	0.542	0.601
TSC2	ULK1	9606.ENSP00000219476	9606.ENSP00000324560	0	0	0	0	0.089	0.145	0	0.69	0.737
ULK1	WIPI1	9606.ENSP00000324560	9606.ENSP00000262139	0	0	0	0	0.099	0.255	0	0.93	0.949
ULK1	VMP1	9606.ENSP00000324560	9606.ENSP00000262291	0	0	0	0	0.062	0	0	0.659	0.667
ULK1	WDR41	9606.ENSP00000324560	9606.ENSP00000296679	0	0	0	0	0	0	0	0.4	0.4
ULK1	ULK2	9606.ENSP00000324560	9606.ENSP00000378914	0	0	0	0.935	0	0.209	0.9	0.978	0.922
ULK2	WIPI1	9606.ENSP00000378914	9606.ENSP00000262139	0	0	0	0	0.099	0.255	0	0.735	0.806
ULK2	VMP1	9606.ENSP00000378914	9606.ENSP00000262291	0	0	0	0	0.062	0	0	0.434	0.446
VMP1	WIPI1	9606.ENSP00000262291	9606.ENSP00000262139	0	0	0	0	0	0	0	0.729	0.729

## Sheet: gene ontology
ONTOLOGY	ID	Description	GeneRatio	BgRatio	pvalue	p.adjust	qvalue	geneID	Count
BP	GO:0010506	regulation of autophagy	38/117	336/18800	1.11505e-37	3.27937e-34	1.99066e-34	CAPN1/AKT1/TP53/ITPR1/MAPK8/BAD/MCL1/PIK3CA/ERN1/RHEB/RAB8A/RUBCN/DAPK3/STK11/RRAGA/MAP3K7/ATG12/RRAGB/WDR41/PIK3C3/TSC2/RRAGC/ATG2A/SH3GLB1/PRKACA/ATG5/RRAGD/TSC1/HMGB1/TP53INP2/AMBRA1/ULK1/RPTOR/WIPI1/MTMR4/ULK2/PRKAA1/ATG7	38
BP	GO:0016236	macroautophagy	34/117	306/18800	2.51009e-33	3.69108e-30	2.24058e-30	CAPN1/AKT1/TP53/MAPK8/PIK3CA/ERN1/RHEB/RAB1A/RUBCN/ATG10/MAP3K7/ATG12/LAMP2/MTMR14/PIK3C3/TSC2/ATG2A/SNAP29/SH3GLB1/PRKACA/SQSTM1/STX17/ATG5/TSC1/TP53INP2/ATG13/AMBRA1/ULK1/MAP1LC3B/WIPI1/VMP1/ULK2/ATG2B/ATG7	34
BP	GO:0071496	cellular response to external stimulus	29/117	309/18800	3.21054e-26	3.1474e-23	1.91055e-23	MAPK1/CASP8/GADD45A/EIF2S1/FOS/TP53/BAK1/PMAIP1/FAS/MAPK8/BAD/ATF4/MAP3K14/RRAGA/LAMP2/RRAGB/PIK3C3/RRAGC/SH3GLB1/ATG5/RRAGD/TSC1/ULK1/MAP1LC3B/RPTOR/WIPI1/PRKAA1/IGF1R/ATG7	29
BP	GO:0042594	response to starvation	22/117	196/18800	1.09109e-21	8.02222e-19	4.86969e-19	MAPK1/EIF2S1/TP53/PMAIP1/FAS/MAPK8/ATF4/RRAGA/LAMP2/RRAGB/PIK3C3/RRAGC/SH3GLB1/ATG5/RRAGD/ULK1/MAP1LC3B/RPTOR/WIPI1/ULK2/PRKAA1/ATG7	22
BP	GO:0031669	cellular response to nutrient levels	22/117	213/18800	6.92561e-21	3.20461e-18	1.94528e-18	MAPK1/EIF2S1/TP53/PMAIP1/FAS/MAPK8/ATF4/RRAGA/LAMP2/RRAGB/PIK3C3/RRAGC/SH3GLB1/ATG5/RRAGD/TSC1/ULK1/MAP1LC3B/RPTOR/WIPI1/PRKAA1/ATG7	22
BP	GO:0031668	cellular response to extracellular stimulus	23/117	245/18800	7.45118e-21	3.20461e-18	1.94528e-18	MAPK1/EIF2S1/FOS/TP53/PMAIP1/FAS/MAPK8/ATF4/RRAGA/LAMP2/RRAGB/PIK3C3/RRAGC/SH3GLB1/ATG5/RRAGD/TSC1/ULK1/MAP1LC3B/RPTOR/WIPI1/PRKAA1/ATG7	23
BP	GO:0016241	regulation of macroautophagy	20/117	158/18800	7.62744e-21	3.20461e-18	1.94528e-18	CAPN1/AKT1/TP53/MAPK8/PIK3CA/ERN1/RHEB/RUBCN/MAP3K7/ATG12/PIK3C3/TSC2/ATG2A/SH3GLB1/PRKACA/ATG5/TSC1/AMBRA1/ULK1/WIPI1	20
BP	GO:0009267	cellular response to starvation	20/117	160/18800	9.87294e-21	3.62954e-18	2.20322e-18	MAPK1/EIF2S1/TP53/PMAIP1/FAS/MAPK8/ATF4/RRAGA/LAMP2/RRAGB/PIK3C3/RRAGC/SH3GLB1/ATG5/RRAGD/MAP1LC3B/RPTOR/WIPI1/PRKAA1/ATG7	20
BP	GO:0097191	extrinsic apoptotic signaling pathway	22/117	221/18800	1.56319e-20	5.10817e-18	3.10079e-18	AKT1/CASP8/BCL2A1/TNF/DAXX/RIPK1/BAK1/PMAIP1/FAS/BAD/RELA/TRAF2/MCL1/LMNA/BID/DAB2IP/BCL2L1/TRADD/BAX/RAF1/RPS6KB1/PTEN	22
BP	GO:0022411	cellular component disassembly	28/117	460/18800	3.57163e-20	1.05042e-17	6.3763e-18	CTSK/CTSS/TP53/TNF/PIK3CA/CTSV/SPTAN1/BAX/RUBCN/ATG12/LAMP2/PIK3C3/TSC2/ATG2A/SNAP29/SQSTM1/STX17/ATG5/ATG13/AMBRA1/ULK1/MAP1LC3B/WIPI1/VMP1/ULK2/IGF1R/ATG2B/ATG7	28
BP	GO:0009991	response to extracellular stimulus	28/117	479/18800	1.04988e-19	2.80699e-17	1.70392e-17	AKT1/MAPK1/EIF2S1/FOS/TP53/TNF/PMAIP1/FAS/MAPK8/ATF4/RPS6KB1/RRAGA/LAMP2/RRAGB/PIK3C3/RRAGC/SH3GLB1/ATG5/RRAGD/TSC1/ULK1/MAP1LC3B/RPTOR/WIPI1/ULK2/PRKAA1/IGF1R/ATG7	28
BP	GO:0000045	autophagosome assembly	17/117	107/18800	1.37904e-19	3.37979e-17	2.05162e-17	RAB1A/ATG12/PIK3C3/ATG2A/SH3GLB1/STX17/ATG5/TP53INP2/ATG13/AMBRA1/ULK1/MAP1LC3B/WIPI1/VMP1/ULK2/ATG2B/ATG7	17
BP	GO:0031667	response to nutrient levels	27/117	446/18800	2.12686e-19	4.81161e-17	2.92077e-17	AKT1/MAPK1/EIF2S1/TP53/TNF/PMAIP1/FAS/MAPK8/ATF4/RPS6KB1/RRAGA/LAMP2/RRAGB/PIK3C3/RRAGC/SH3GLB1/ATG5/RRAGD/TSC1/ULK1/MAP1LC3B/RPTOR/WIPI1/ULK2/PRKAA1/IGF1R/ATG7	27
BP	GO:1905037	autophagosome organization	17/117	111/18800	2.6541e-19	5.5755e-17	3.38447e-17	RAB1A/ATG12/PIK3C3/ATG2A/SH3GLB1/STX17/ATG5/TP53INP2/ATG13/AMBRA1/ULK1/MAP1LC3B/WIPI1/VMP1/ULK2/ATG2B/ATG7	17
BP	GO:0000422	autophagy of mitochondrion	15/117	88/18800	7.00534e-18	1.28767e-15	7.81649e-16	CTSK/TP53/ATG12/TSC2/ATG2A/SQSTM1/ATG5/ATG13/AMBRA1/ULK1/MAP1LC3B/WIPI1/ULK2/ATG2B/ATG7	15
BP	GO:0061726	mitochondrion disassembly	15/117	88/18800	7.00534e-18	1.28767e-15	7.81649e-16	CTSK/TP53/ATG12/TSC2/ATG2A/SQSTM1/ATG5/ATG13/AMBRA1/ULK1/MAP1LC3B/WIPI1/ULK2/ATG2B/ATG7	15
BP	GO:0070997	neuron death	23/117	353/18800	2.73386e-17	4.72957e-15	2.87097e-15	AKT1/CASP8/EIF2S1/FOS/TP53/TNF/CASP7/DAXX/FAS/BAD/HRAS/TRAF2/MCL1/PIK3CA/KRAS/BID/ATF4/CTSZ/BCL2L1/CAPN2/BAX/TSC1/AKT1S1	23
BP	GO:0044804	autophagy of nucleus	9/117	16/18800	1.12916e-16	1.84493e-14	1.11992e-14	ATG12/ATG2A/ATG5/ATG13/ULK1/WIPI1/ULK2/ATG2B/ATG7	9
BP	GO:1903008	organelle disassembly	15/117	121/18800	1.00693e-15	1.55862e-13	9.46122e-14	CTSK/TP53/ATG12/TSC2/ATG2A/SQSTM1/ATG5/ATG13/AMBRA1/ULK1/MAP1LC3B/WIPI1/ULK2/ATG2B/ATG7	15
BP	GO:0031929	TOR signaling	15/117	128/18800	2.37776e-15	3.37201e-13	2.0469e-13	AKT1/PIK3CA/RPS6KB1/RHEB/STK11/RRAGA/RRAGB/TSC2/RRAGC/RPS6KB2/RRAGD/TSC1/AKT1S1/RPTOR/PRKAA1	15
BP	GO:0007033	vacuole organization	17/117	188/18800	2.40776e-15	3.37201e-13	2.0469e-13	RAB1A/ATG12/PIK3C3/ATG2A/SH3GLB1/STX17/ATG5/TP53INP2/ATG13/AMBRA1/ULK1/MAP1LC3B/WIPI1/VMP1/ULK2/ATG2B/ATG7	17
BP	GO:2001235	positive regulation of apoptotic signaling pathway	15/117	134/18800	4.76962e-15	6.37612e-13	3.87047e-13	CTSH/TP53/TNF/RIPK1/PMAIP1/FAS/BAD/CTSC/TRAF2/MCL1/BID/DAB2IP/BBC3/BAX/PTEN	15
BP	GO:1901214	regulation of neuron death	20/117	313/18800	5.77105e-15	7.37942e-13	4.4795e-13	AKT1/CASP8/EIF2S1/FOS/TP53/TNF/DAXX/BAD/HRAS/TRAF2/MCL1/PIK3CA/KRAS/ATF4/CTSZ/BCL2L1/CAPN2/BAX/TSC1/AKT1S1	20
BP	GO:0018105	peptidyl-serine phosphorylation	20/117	315/18800	6.51618e-15	7.98504e-13	4.84713e-13	AKT1/MAPK1/GADD45A/TNF/RIPK1/BAK1/CHUK/MAPK8/PIK3CA/BAX/ERN1/RAF1/RPS6KB1/PTEN/RPS6KB2/PRKACA/ULK1/RPTOR/ULK2/PRKAA1	20
BP	GO:2001233	regulation of apoptotic signaling pathway	21/117	370/18800	1.19125e-14	1.40139e-12	8.50679e-13	AKT1/CTSH/TP53/TNF/RIPK1/PMAIP1/FAS/BAD/CTSC/RELA/TRAF2/MCL1/LMNA/BID/DAB2IP/BCL2L1/BBC3/BAX/RAF1/RPS6KB1/PTEN	21
BP	GO:0062197	NA	20/117	332/18800	1.76882e-14	2.0008e-12	1.21454e-12	AKT1/MAPK1/EIF2S1/FOS/TP53/TNF/RIPK1/FAS/CHUK/MAPK8/BAD/RELA/MCL1/PIK3CA/ATF4/ERN1/ATG5/TSC1/PRKAA1/ATG7	20
BP	GO:0018209	peptidyl-serine modification	20/117	338/18800	2.48221e-14	2.66857e-12	1.61989e-12	AKT1/MAPK1/GADD45A/TNF/RIPK1/BAK1/CHUK/MAPK8/PIK3CA/BAX/ERN1/RAF1/RPS6KB1/PTEN/RPS6KB2/PRKACA/ULK1/RPTOR/ULK2/PRKAA1	20
BP	GO:0097193	intrinsic apoptotic signaling pathway	19/117	295/18800	2.54063e-14	2.66857e-12	1.61989e-12	AKT1/TP53/BCL2A1/TNF/ITPR1/BAK1/PMAIP1/BAD/HRAS/TRAF2/MCL1/BID/ATF4/DAB2IP/BCL2L1/BBC3/BAX/ERN1/STK11	19
BP	GO:0031331	positive regulation of cellular catabolic process	22/117	449/18800	5.27898e-14	5.35362e-12	3.24978e-12	AKT1/TNF/BAD/CTSC/DAB2IP/BAX/STK11/MAP3K7/PTEN/TSC2/ATG2A/SH3GLB1/TSC1/IRS2/HMGB1/TP53INP2/IRS1/AMBRA1/ULK1/WIPI1/ULK2/PRKAA1	22
BP	GO:0010508	positive regulation of autophagy	14/117	136/18800	1.32761e-13	1.3015e-11	7.90043e-12	BAD/STK11/MAP3K7/TSC2/ATG2A/SH3GLB1/TSC1/HMGB1/TP53INP2/AMBRA1/ULK1/WIPI1/ULK2/PRKAA1	14
BP	GO:0043281	regulation of cysteine-type endopeptidase activity involved in apoptotic process	16/117	204/18800	1.57215e-13	1.44769e-11	8.78787e-12	AKT1/CTSH/CASP8/BIRC5/TNF/BAK1/PMAIP1/FAS/BAD/CTSD/BID/BBC3/BAX/RAF1/IGBP1/HMGB1	16
BP	GO:0070059	intrinsic apoptotic signaling pathway in response to endoplasmic reticulum stress	11/117	63/18800	1.57518e-13	1.44769e-11	8.78787e-12	TP53/ITPR1/BAK1/PMAIP1/TRAF2/ATF4/DAB2IP/BCL2L1/BBC3/BAX/ERN1	11
BP	GO:0008625	extrinsic apoptotic signaling pathway via death domain receptors	12/117	85/18800	1.7041e-13	1.51872e-11	9.219e-12	CASP8/TNF/DAXX/PMAIP1/BAD/BID/DAB2IP/BCL2L1/TRADD/BAX/RAF1/PTEN	12
BP	GO:0051403	stress-activated MAPK cascade	17/117	245/18800	1.94191e-13	1.67975e-11	1.01965e-11	MAPK1/GADD45A/TNF/DAXX/RIPK1/FAS/MAPK8/HRAS/TRAF2/GADD45B/GADD45G/DAB2IP/MAP3K7/IGBP1/HMGB1/TRAF6/IGF1R	17
BP	GO:0034198	cellular response to amino acid starvation	10/117	47/18800	2.51379e-13	2.0664e-11	1.25436e-11	MAPK1/EIF2S1/FAS/MAPK8/ATF4/RRAGA/RRAGB/RRAGC/SH3GLB1/RRAGD	10
BP	GO:0034612	response to tumor necrosis factor	17/117	249/18800	2.52943e-13	2.0664e-11	1.25436e-11	AKT1/MAPK1/CASP8/TP53/TNF/RIPK1/FAS/CHUK/RELA/TRAF2/DAB2IP/TRADD/NFKBIA/RPS6KB1/RRAGA/IGBP1/TRAF6	17
BP	GO:0043200	response to amino acid	13/117	114/18800	2.71809e-13	2.16051e-11	1.31149e-11	TNF/BAD/PIK3CA/BCL2L1/CAPN2/RPS6KB1/RRAGA/RRAGB/PIK3C3/RRAGC/RRAGD/RPTOR/IGF1R	13
BP	GO:0031098	stress-activated protein kinase signaling cascade	17/117	252/18800	3.07452e-13	2.37952e-11	1.44443e-11	MAPK1/GADD45A/TNF/DAXX/RIPK1/FAS/MAPK8/HRAS/TRAF2/GADD45B/GADD45G/DAB2IP/MAP3K7/IGBP1/HMGB1/TRAF6/IGF1R	17
BP	GO:1990928	response to amino acid starvation	10/117	49/18800	3.94828e-13	2.97741e-11	1.80737e-11	MAPK1/EIF2S1/FAS/MAPK8/ATF4/RRAGA/RRAGB/RRAGC/SH3GLB1/RRAGD	10
BP	GO:2000116	regulation of cysteine-type endopeptidase activity	16/117	229/18800	9.41125e-13	6.91962e-11	4.20039e-11	AKT1/CTSH/CASP8/BIRC5/TNF/BAK1/PMAIP1/FAS/BAD/CTSD/BID/BBC3/BAX/RAF1/IGBP1/HMGB1	16
BP	GO:0001101	response to acid chemical	13/117	129/18800	1.36661e-12	9.58938e-11	5.821e-11	TNF/BAD/PIK3CA/BCL2L1/CAPN2/RPS6KB1/RRAGA/RRAGB/PIK3C3/RRAGC/RRAGD/RPTOR/IGF1R	13
BP	GO:0061912	selective autophagy	11/117	76/18800	1.36945e-12	9.58938e-11	5.821e-11	TP53/TSC2/ATG2A/SQSTM1/ATG5/ATG13/AMBRA1/ULK1/MAP1LC3B/ULK2/ATG2B	11
BP	GO:0001836	release of cytochrome c from mitochondria	10/117	56/18800	1.6497e-12	1.12832e-10	6.8492e-11	AKT1/TP53/BAK1/PMAIP1/BAD/LMNA/BID/BCL2L1/BBC3/BAX	10
BP	GO:0009612	response to mechanical stimulus	15/117	201/18800	1.95638e-12	1.30766e-10	7.93784e-11	CASP8/GADD45A/FOS/TNF/BAK1/FAS/MAPK8/BAD/RELA/PIK3CA/MAP3K14/NFKBIA/RAF1/RPS6KB1/IGF1R	15
BP	GO:0032006	regulation of TOR signaling	12/117	106/18800	2.55674e-12	1.67097e-10	1.01432e-10	PIK3CA/RHEB/STK11/RRAGA/RRAGB/TSC2/RRAGC/RRAGD/TSC1/AKT1S1/RPTOR/PRKAA1	12
BP	GO:0033209	tumor necrosis factor-mediated signaling pathway	12/117	107/18800	2.86482e-12	1.83162e-10	1.11184e-10	CASP8/TP53/TNF/RIPK1/FAS/CHUK/RELA/TRAF2/TRADD/NFKBIA/RRAGA/TRAF6	12
BP	GO:0007254	JNK cascade	14/117	175/18800	4.34195e-12	2.71696e-10	1.64926e-10	GADD45A/TNF/DAXX/RIPK1/MAPK8/HRAS/TRAF2/GADD45B/GADD45G/DAB2IP/MAP3K7/HMGB1/TRAF6/IGF1R	14
BP	GO:1901216	positive regulation of neuron death	11/117	87/18800	6.32492e-12	3.87533e-10	2.35243e-10	CASP8/EIF2S1/FOS/TP53/TNF/DAXX/BAD/MCL1/ATF4/CAPN2/BAX	11
BP	GO:0010821	regulation of mitochondrion organization	13/117	148/18800	8.02857e-12	4.81878e-10	2.92513e-10	AKT1/TP53/PMAIP1/MAPK8/BAD/LMNA/BID/BCL2L1/BBC3/BAX/TSC2/SQSTM1/AMBRA1	13
BP	GO:0038034	signal transduction in absence of ligand	10/117	66/18800	9.28039e-12	5.26417e-10	3.19549e-10	AKT1/BCL2A1/TNF/RIPK1/BAK1/FAS/BAD/MCL1/BCL2L1/BAX	10
BP	GO:0097192	extrinsic apoptotic signaling pathway in absence of ligand	10/117	66/18800	9.28039e-12	5.26417e-10	3.19549e-10	AKT1/BCL2A1/TNF/RIPK1/BAK1/FAS/BAD/MCL1/BCL2L1/BAX	10
BP	GO:0090199	regulation of release of cytochrome c from mitochondria	9/117	46/18800	9.30761e-12	5.26417e-10	3.19549e-10	AKT1/TP53/PMAIP1/BAD/LMNA/BID/BCL2L1/BBC3/BAX	9
BP	GO:2001236	regulation of extrinsic apoptotic signaling pathway	13/117	153/18800	1.22722e-11	6.80991e-10	4.13379e-10	AKT1/TNF/RIPK1/PMAIP1/RELA/TRAF2/MCL1/LMNA/BID/BCL2L1/RAF1/RPS6KB1/PTEN	13
BP	GO:0071356	cellular response to tumor necrosis factor	15/117	229/18800	1.28141e-11	6.97891e-10	4.23638e-10	AKT1/MAPK1/CASP8/TP53/TNF/RIPK1/FAS/CHUK/RELA/TRAF2/DAB2IP/TRADD/NFKBIA/RRAGA/TRAF6	15
BP	GO:0071214	cellular response to abiotic stimulus	17/117	323/18800	1.64881e-11	8.65922e-10	5.25637e-10	CASP8/GADD45A/EIF2S1/TP53/BAK1/FAS/MAPK8/BAD/HRAS/PIK3CA/ATF4/BCL2L1/BAX/MAP3K14/STK11/PTEN/IGF1R	17
BP	GO:0104004	cellular response to environmental stimulus	17/117	323/18800	1.64881e-11	8.65922e-10	5.25637e-10	CASP8/GADD45A/EIF2S1/TP53/BAK1/FAS/MAPK8/BAD/HRAS/PIK3CA/ATF4/BCL2L1/BAX/MAP3K14/STK11/PTEN/IGF1R	17
BP	GO:0043280	positive regulation of cysteine-type endopeptidase activity involved in apoptotic process	12/117	125/18800	1.85462e-11	9.56921e-10	5.80876e-10	CTSH/CASP8/TNF/BAK1/PMAIP1/FAS/BAD/CTSD/BID/BBC3/BAX/HMGB1	12
BP	GO:0032872	regulation of stress-activated MAPK cascade	14/117	198/18800	2.3151e-11	1.17392e-09	7.12597e-10	MAPK1/GADD45A/TNF/RIPK1/FAS/HRAS/TRAF2/GADD45B/GADD45G/DAB2IP/IGBP1/HMGB1/TRAF6/IGF1R	14
BP	GO:0070302	regulation of stress-activated protein kinase signaling cascade	14/117	201/18800	2.83404e-11	1.4127e-09	8.57545e-10	MAPK1/GADD45A/TNF/RIPK1/FAS/HRAS/TRAF2/GADD45B/GADD45G/DAB2IP/IGBP1/HMGB1/TRAF6/IGF1R	14
BP	GO:0097352	autophagosome maturation	9/117	55/18800	5.12684e-11	2.51301e-09	1.52546e-09	RUBCN/ATG12/LAMP2/PIK3C3/SNAP29/STX17/ATG5/MAP1LC3B/VMP1	9
BP	GO:0008637	apoptotic mitochondrial changes	11/117	107/18800	6.30789e-11	3.04123e-09	1.84611e-09	AKT1/TP53/BAK1/PMAIP1/MAPK8/BAD/LMNA/BID/BCL2L1/BBC3/BAX	11
BP	GO:2001056	positive regulation of cysteine-type endopeptidase activity	12/117	143/18800	9.10941e-11	4.32109e-09	2.62301e-09	CTSH/CASP8/TNF/BAK1/PMAIP1/FAS/BAD/CTSD/BID/BBC3/BAX/HMGB1	12
BP	GO:0046902	regulation of mitochondrial membrane permeability	9/117	62/18800	1.57743e-10	7.36383e-09	4.47003e-09	TP53/BAK1/PMAIP1/MAPK8/BAD/BID/BCL2L1/BBC3/BAX	9
BP	GO:0006979	response to oxidative stress	18/117	433/18800	1.92038e-10	8.82474e-09	5.35684e-09	AKT1/MAPK1/EIF2S1/FOS/TP53/TNF/RIPK1/BAK1/CHUK/MAPK8/BAD/RELA/MCL1/ATF4/CAPN2/ERN1/TSC1/PRKAA1	18
BP	GO:0034599	cellular response to oxidative stress	15/117	284/18800	2.67477e-10	1.21023e-08	7.34642e-09	AKT1/MAPK1/EIF2S1/FOS/TP53/TNF/RIPK1/CHUK/MAPK8/RELA/MCL1/ATF4/ERN1/TSC1/PRKAA1	15
BP	GO:0046330	positive regulation of JNK cascade	10/117	96/18800	4.24607e-10	1.89208e-08	1.14854e-08	GADD45A/TNF/RIPK1/HRAS/TRAF2/GADD45B/GADD45G/DAB2IP/HMGB1/TRAF6	10
BP	GO:0034976	response to endoplasmic reticulum stress	14/117	257/18800	7.34358e-10	3.2235e-08	1.95675e-08	EIF2S1/TP53/ITPR1/BAK1/PMAIP1/TRAF2/ATF4/DAB2IP/BCL2L1/BBC3/BAX/ERN1/ATG10/NRBF2	14
BP	GO:0010950	positive regulation of endopeptidase activity	12/117	174/18800	8.90845e-10	3.8529e-08	2.33881e-08	CTSH/CASP8/TNF/BAK1/PMAIP1/FAS/BAD/CTSD/BID/BBC3/BAX/HMGB1	12
BP	GO:0006919	activation of cysteine-type endopeptidase activity involved in apoptotic process	9/117	77/18800	1.16055e-09	4.83483e-08	2.93487e-08	CTSH/CASP8/TNF/BAK1/PMAIP1/BAD/BID/BBC3/BAX	9
BP	GO:0090559	regulation of membrane permeability	9/117	77/18800	1.16055e-09	4.83483e-08	2.93487e-08	TP53/BAK1/PMAIP1/MAPK8/BAD/BID/BCL2L1/BBC3/BAX	9
BP	GO:0045862	positive regulation of proteolysis	16/117	369/18800	1.1672e-09	4.83483e-08	2.93487e-08	AKT1/CTSH/CASP8/TNF/BAK1/PMAIP1/FAS/BAD/CTSC/CTSD/BID/DAB2IP/BBC3/BAX/PTEN/HMGB1	16
BP	GO:0046328	regulation of JNK cascade	11/117	141/18800	1.25476e-09	5.12535e-08	3.11122e-08	GADD45A/TNF/RIPK1/HRAS/TRAF2/GADD45B/GADD45G/DAB2IP/HMGB1/TRAF6/IGF1R	11
BP	GO:0006839	mitochondrial transport	12/117	182/18800	1.49148e-09	5.96197e-08	3.61907e-08	TP53/BAK1/PMAIP1/MAPK8/BAD/BID/BCL2L1/BBC3/BAX/SH3GLB1/ATG13/PRKAA1	12
BP	GO:0071887	leukocyte apoptotic process	10/117	109/18800	1.50012e-09	5.96197e-08	3.61907e-08	AKT1/CTSL/TP53/RIPK1/BAK1/FAS/PIK3CD/BAX/PTEN/IRS2	10
BP	GO:0070482	response to oxygen levels	15/117	324/18800	1.64735e-09	6.45983e-08	3.92128e-08	AKT1/ITPR2/TP53/TNF/ITPR1/PMAIP1/FAS/BAD/LMNA/ATF4/CAPN2/PTEN/TSC1/PRKAA1/ATG7	15
BP	GO:0009411	response to UV	11/117	146/18800	1.81911e-09	6.95765e-08	4.22347e-08	AKT1/EIF2S1/TP53/CASP7/BAK1/MAPK8/RELA/ATF4/BAX/STK11/PRKAA1	11
BP	GO:0009314	response to radiation	17/117	438/18800	1.82162e-09	6.95765e-08	4.22347e-08	AKT1/GADD45A/EIF2S1/FOS/TP53/TNF/CASP7/BAK1/MAPK8/RELA/HRAS/KRAS/ATF4/BCL2L1/BAX/STK11/PRKAA1	17
BP	GO:0007252	I-kappaB phosphorylation	6/117	21/18800	2.56688e-09	9.67846e-08	5.87508e-08	AKT1/TNF/CHUK/TRAF2/DAB2IP/MAP3K7	6
BP	GO:0010952	positive regulation of peptidase activity	12/117	192/18800	2.74413e-09	1.02158e-07	6.20126e-08	CTSH/CASP8/TNF/BAK1/PMAIP1/FAS/BAD/CTSD/BID/BBC3/BAX/HMGB1	12
BP	GO:0010507	negative regulation of autophagy	9/117	85/18800	2.84165e-09	1.03177e-07	6.26308e-08	AKT1/TP53/MCL1/PIK3CA/RUBCN/RRAGA/TSC2/TSC1/ATG7	9
BP	GO:0071229	cellular response to acid chemical	9/117	85/18800	2.84165e-09	1.03177e-07	6.26308e-08	TNF/PIK3CA/BCL2L1/CAPN2/RRAGA/RRAGB/RRAGC/RRAGD/RPTOR	9
BP	GO:0032984	protein-containing complex disassembly	13/117	239/18800	3.14261e-09	1.12712e-07	6.84193e-08	TNF/PIK3CA/SPTAN1/RUBCN/ATG12/LAMP2/PIK3C3/SNAP29/STX17/ATG5/MAP1LC3B/VMP1/IGF1R	13
BP	GO:0007249	I-kappaB kinase/NF-kappaB signaling	14/117	288/18800	3.20586e-09	1.13596e-07	6.89555e-08	AKT1/CASP8/TNF/RIPK1/CHUK/RELA/TRAF2/DAB2IP/TRADD/MAP3K14/NFKBIA/MAP3K7/SQSTM1/TRAF6	14
BP	GO:0052547	regulation of peptidase activity	17/117	456/18800	3.33651e-09	1.16818e-07	7.09113e-08	AKT1/CTSH/CASP8/BIRC5/TNF/BAK1/PMAIP1/FAS/BAD/CTSD/BID/CTSB/BBC3/BAX/RAF1/IGBP1/HMGB1	17
BP	GO:0051402	neuron apoptotic process	13/117	241/18800	3.47585e-09	1.20264e-07	7.30035e-08	TP53/TNF/CASP7/FAS/HRAS/MCL1/PIK3CA/KRAS/BID/ATF4/BCL2L1/BAX/AKT1S1	13
BP	GO:0000302	response to reactive oxygen species	12/117	203/18800	5.15677e-09	1.76349e-07	1.07049e-07	AKT1/MAPK1/FOS/RIPK1/BAK1/CHUK/MAPK8/BAD/RELA/CAPN2/ERN1/PRKAA1	12
BP	GO:0071453	cellular response to oxygen levels	11/117	166/18800	7.05845e-09	2.38608e-07	1.44841e-07	AKT1/TP53/PMAIP1/FAS/BAD/LMNA/ATF4/PTEN/TSC1/PRKAA1/ATG7	11
BP	GO:0019221	cytokine-mediated signaling pathway	17/117	486/18800	8.61462e-09	2.87905e-07	1.74766e-07	AKT1/CASP8/TP53/TNF/RIPK1/FAS/CHUK/BAD/RELA/TRAF2/IL3RA/TRADD/NFKBIA/RRAGA/MAP3K7/PRKACA/TRAF6	17
BP	GO:0052548	regulation of endopeptidase activity	16/117	426/18800	9.07029e-09	2.99727e-07	1.81942e-07	AKT1/CTSH/CASP8/BIRC5/TNF/BAK1/PMAIP1/FAS/BAD/CTSD/BID/BBC3/BAX/RAF1/IGBP1/HMGB1	16
BP	GO:2001237	negative regulation of extrinsic apoptotic signaling pathway	9/117	97/18800	9.26869e-09	3.0288e-07	1.83856e-07	AKT1/TNF/RIPK1/RELA/MCL1/LMNA/BCL2L1/RAF1/RPS6KB1	9
BP	GO:0032874	positive regulation of stress-activated MAPK cascade	10/117	132/18800	9.74409e-09	3.14916e-07	1.91162e-07	GADD45A/TNF/RIPK1/HRAS/TRAF2/GADD45B/GADD45G/DAB2IP/HMGB1/TRAF6	10
BP	GO:0043491	protein kinase B signaling	12/117	216/18800	1.03609e-08	3.31212e-07	2.01054e-07	AKT1/PIK3R3/TNF/PIK3CA/PIK3CD/RPS6KB1/STK11/RRAS/PTEN/TSC2/RPS6KB2/IGF1R	12
BP	GO:0090200	positive regulation of release of cytochrome c from mitochondria	6/117	26/18800	1.06181e-08	3.35783e-07	2.03829e-07	TP53/PMAIP1/BAD/BID/BBC3/BAX	6
BP	GO:0070304	positive regulation of stress-activated protein kinase signaling cascade	10/117	134/18800	1.12684e-08	3.52556e-07	2.14011e-07	GADD45A/TNF/RIPK1/HRAS/TRAF2/GADD45B/GADD45G/DAB2IP/HMGB1/TRAF6	10
BP	GO:0071260	cellular response to mechanical stimulus	8/117	70/18800	1.20927e-08	3.74363e-07	2.27248e-07	CASP8/GADD45A/BAK1/FAS/MAPK8/BAD/MAP3K14/IGF1R	8
BP	GO:0008630	intrinsic apoptotic signaling pathway in response to DNA damage	9/117	101/18800	1.32659e-08	4.06405e-07	2.46698e-07	TP53/BCL2A1/TNF/BAK1/BAD/MCL1/BID/BCL2L1/BAX	9
BP	GO:0048015	phosphatidylinositol-mediated signaling	11/117	177/18800	1.37956e-08	4.18278e-07	2.53906e-07	AKT1/TNF/PIK3CA/DAB2IP/PIK3CD/RPS6KB1/PTEN/PIK3C3/TSC2/IRS1/IGF1R	11
BP	GO:0009895	negative regulation of catabolic process	14/117	324/18800	1.43551e-08	4.30798e-07	2.61506e-07	AKT1/TP53/TNF/RELA/TRAF2/MCL1/PIK3CA/DAB2IP/RUBCN/RRAGA/TSC2/TSC1/PRKAA1/ATG7	14
BP	GO:0032008	positive regulation of TOR signaling	7/117	47/18800	1.54419e-08	4.58733e-07	2.78463e-07	PIK3CA/RHEB/RRAGA/RRAGB/RRAGC/RRAGD/RPTOR	7
BP	GO:0043201	response to leucine	5/117	14/18800	1.63976e-08	4.82253e-07	2.9274e-07	PIK3CA/RPS6KB1/PIK3C3/RRAGD/RPTOR	5
BP	GO:0016239	positive regulation of macroautophagy	8/117	73/18800	1.69541e-08	4.93683e-07	2.99678e-07	MAP3K7/TSC2/ATG2A/SH3GLB1/TSC1/AMBRA1/ULK1/WIPI1	8
BP	GO:0048017	inositol lipid-mediated signaling	11/117	181/18800	1.74013e-08	5.01738e-07	3.04568e-07	AKT1/TNF/PIK3CA/DAB2IP/PIK3CD/RPS6KB1/PTEN/PIK3C3/TSC2/IRS1/IGF1R	11
BP	GO:0038061	NIK/NF-kappaB signaling	10/117	141/18800	1.83998e-08	5.25376e-07	3.18917e-07	AKT1/TNF/CHUK/RELA/TRAF2/TRADD/MAP3K14/NFKBIA/MAP3K7/TRAF6	10
BP	GO:0097300	programmed necrotic cell death	7/117	49/18800	2.08762e-08	5.78863e-07	3.51385e-07	CASP8/TP53/TNF/RIPK1/FAS/TRAF2/BAX	7
BP	GO:0010822	positive regulation of mitochondrion organization	8/117	75/18800	2.10603e-08	5.78863e-07	3.51385e-07	TP53/PMAIP1/MAPK8/BAD/BID/BBC3/BAX/AMBRA1	8
BP	GO:0070227	lymphocyte apoptotic process	8/117	75/18800	2.10603e-08	5.78863e-07	3.51385e-07	AKT1/TP53/RIPK1/BAK1/FAS/BAX/PTEN/IRS2	8
BP	GO:0071230	cellular response to amino acid stimulus	8/117	75/18800	2.10603e-08	5.78863e-07	3.51385e-07	TNF/BCL2L1/CAPN2/RRAGA/RRAGB/RRAGC/RRAGD/RPTOR	8
BP	GO:0033135	regulation of peptidyl-serine phosphorylation	10/117	144/18800	2.25167e-08	6.13162e-07	3.72205e-07	AKT1/GADD45A/TNF/BAK1/PIK3CA/BAX/RAF1/PTEN/RPTOR/PRKAA1	10
BP	GO:0016485	protein processing	12/117	243/18800	3.83382e-08	1.03443e-06	6.27924e-07	CTSH/CASP8/CTSS/CTSL/CASP7/BAK1/BAD/CTSZ/CAPN2/PRKACB/PIK3C3/PRKACA	12
BP	GO:0033674	positive regulation of kinase activity	16/117	476/18800	4.26884e-08	1.14133e-06	6.92819e-07	AKT1/TNF/DAXX/BAD/HRAS/TRAF2/PIK3CA/DAB2IP/ERN1/STK11/MAP3K7/IRS1/AMBRA1/TRAF6/RPTOR/IGF1R	16
BP	GO:0036293	response to decreased oxygen levels	13/117	299/18800	4.53119e-08	1.20056e-06	7.28771e-07	AKT1/ITPR2/TP53/TNF/ITPR1/PMAIP1/BAD/LMNA/ATF4/CAPN2/PTEN/TSC1/PRKAA1	13
BP	GO:0007006	mitochondrial membrane organization	9/117	117/18800	4.8289e-08	1.26802e-06	7.69719e-07	TP53/BAK1/PMAIP1/MAPK8/BAD/BID/BCL2L1/BBC3/BAX	9
BP	GO:0002764	immune response-regulating signaling pathway	16/117	482/18800	5.07387e-08	1.32055e-06	8.01611e-07	CTSH/MAPK1/CTSS/TNF/MAPK8/RELA/HRAS/PIK3CA/DAB2IP/PIK3CD/BAX/NFKBIA/STK11/MAP3K7/HMGB1/TRAF6	16
BP	GO:0006006	glucose metabolic process	11/117	201/18800	5.12617e-08	1.32246e-06	8.02769e-07	AKT1/TP53/TNF/PMAIP1/BAD/PIK3CA/ATF4/STK11/IRS2/IRS1/PRKAA1	11
BP	GO:0008286	insulin receptor signaling pathway	9/117	118/18800	5.20059e-08	1.33e-06	8.07342e-07	AKT1/PIK3R3/PIK3CA/RPS6KB1/TSC2/IRS2/IRS1/PRKAA1/IGF1R	9
BP	GO:0010638	positive regulation of organelle organization	16/117	487/18800	5.84807e-08	1.48269e-06	9.00029e-07	MAPK1/TP53/TNF/PMAIP1/MAPK8/BAD/HRAS/BID/BBC3/BAX/ATG2A/SH3GLB1/TSC1/AMBRA1/ULK1/WIPI1	16
BP	GO:0000423	mitophagy	6/117	34/18800	5.95618e-08	1.4845e-06	9.01131e-07	TP53/TSC2/SQSTM1/ATG13/AMBRA1/MAP1LC3B	6
BP	GO:0043276	anoikis	6/117	34/18800	5.95618e-08	1.4845e-06	9.01131e-07	AKT1/MCL1/PIK3CA/STK11/MAP3K7/TSC2	6
BP	GO:0043122	regulation of I-kappaB kinase/NF-kappaB signaling	12/117	254/18800	6.23495e-08	1.54092e-06	9.3538e-07	CASP8/TNF/RIPK1/CHUK/RELA/TRAF2/DAB2IP/TRADD/MAP3K14/MAP3K7/SQSTM1/TRAF6	12
BP	GO:1901652	response to peptide	16/117	491/18800	6.54342e-08	1.60368e-06	9.73477e-07	AKT1/PIK3R3/TP53/TNF/RELA/PIK3CA/NFKBIA/RPS6KB1/RAB8A/STK11/TSC2/TSC1/IRS2/IRS1/PRKAA1/IGF1R	16
BP	GO:0071216	cellular response to biotic stimulus	12/117	256/18800	6.79372e-08	1.65127e-06	1.00236e-06	AKT1/MAPK1/TP53/TNF/MAPK8/RELA/DAB2IP/CAPN2/NFKBIA/ATG10/HMGB1/TRAF6	12
BP	GO:0009416	response to light stimulus	13/117	310/18800	6.91126e-08	1.66607e-06	1.01135e-06	AKT1/EIF2S1/FOS/TP53/CASP7/BAK1/MAPK8/RELA/KRAS/ATF4/BAX/STK11/PRKAA1	13
BP	GO:0016242	negative regulation of macroautophagy	6/117	35/18800	7.15217e-08	1.71012e-06	1.03809e-06	AKT1/TP53/PIK3CA/RUBCN/TSC2/TSC1	6
BP	GO:2001244	positive regulation of intrinsic apoptotic signaling pathway	7/117	61/18800	9.97006e-08	2.36467e-06	1.43542e-06	TP53/PMAIP1/BAD/MCL1/BID/BBC3/BAX	7
BP	GO:0071276	cellular response to cadmium ion	6/117	37/18800	1.01405e-07	2.38585e-06	1.44827e-06	AKT1/MAPK1/FOS/DAXX/CHUK/MAPK8	6
BP	GO:0071241	cellular response to inorganic substance	11/117	221/18800	1.34572e-07	3.14109e-06	1.90672e-06	AKT1/MAPK1/EIF2S1/FOS/DAXX/CHUK/MAPK8/BAD/TRAF2/ATF4/PRKAA1	11
BP	GO:0006497	protein lipidation	8/117	96/18800	1.48524e-07	3.43944e-06	2.08783e-06	ATG10/ATG12/PIK3C3/ATG5/ATG13/ULK1/WIPI1/ATG7	8
BP	GO:0046777	protein autophosphorylation	11/117	224/18800	1.54204e-07	3.54308e-06	2.15074e-06	AKT1/EIF2S1/RIPK1/ERN1/DAPK3/STK11/PRKACA/ATG13/ULK1/ULK2/IGF1R	11
BP	GO:0032496	response to lipopolysaccharide	13/117	333/18800	1.58337e-07	3.60985e-06	2.19127e-06	AKT1/MAPK1/CASP8/FOS/TNF/MAPK8/RELA/DAB2IP/CAPN2/NFKBIA/RPS6KB1/HMGB1/TRAF6	13
BP	GO:0070265	necrotic cell death	7/117	66/18800	1.73474e-07	3.92452e-06	2.38229e-06	CASP8/TP53/TNF/RIPK1/FAS/TRAF2/BAX	7
BP	GO:2001234	negative regulation of apoptotic signaling pathway	11/117	230/18800	2.01236e-07	4.51783e-06	2.74244e-06	AKT1/TNF/RIPK1/RELA/MCL1/LMNA/BID/BCL2L1/BAX/RAF1/RPS6KB1	11
BP	GO:0042158	lipoprotein biosynthetic process	8/117	101/18800	2.20598e-07	4.91499e-06	2.98352e-06	ATG10/ATG12/PIK3C3/ATG5/ATG13/ULK1/WIPI1/ATG7	8
BP	GO:0042157	lipoprotein metabolic process	9/117	140/18800	2.27274e-07	5.02567e-06	3.05071e-06	CTSD/ATG10/ATG12/PIK3C3/ATG5/ATG13/ULK1/WIPI1/ATG7	9
BP	GO:0097305	response to alcohol	11/117	235/18800	2.49714e-07	5.48067e-06	3.32691e-06	AKT1/CASP8/ITPR2/FOS/TNF/BAK1/BAD/BCL2L1/RPS6KB1/PRKAA1/IGF1R	11
BP	GO:0043507	positive regulation of JUN kinase activity	6/117	43/18800	2.57962e-07	5.61975e-06	3.41133e-06	TNF/TRAF2/DAB2IP/ERN1/MAP3K7/TRAF6	6
BP	GO:0043123	positive regulation of I-kappaB kinase/NF-kappaB signaling	10/117	188/18800	2.78161e-07	6.01523e-06	3.6514e-06	CASP8/TNF/RIPK1/CHUK/RELA/TRAF2/TRADD/MAP3K14/MAP3K7/TRAF6	10
BP	GO:0051881	regulation of mitochondrial membrane potential	7/117	71/18800	2.8874e-07	6.15897e-06	3.73865e-06	AKT1/BAK1/PMAIP1/BAD/BID/BCL2L1/BAX	7
BP	GO:0014065	phosphatidylinositol 3-kinase signaling	9/117	144/18800	2.88996e-07	6.15897e-06	3.73865e-06	AKT1/TNF/PIK3CA/DAB2IP/PIK3CD/PTEN/TSC2/IRS1/IGF1R	9
BP	GO:0002237	response to molecule of bacterial origin	13/117	354/18800	3.18954e-07	6.74851e-06	4.09652e-06	AKT1/MAPK1/CASP8/FOS/TNF/MAPK8/RELA/DAB2IP/CAPN2/NFKBIA/RPS6KB1/HMGB1/TRAF6	13
BP	GO:0035994	response to muscle stretch	5/117	24/18800	3.31249e-07	6.95859e-06	4.22405e-06	FOS/RELA/PIK3CA/NFKBIA/RAF1	5
BP	GO:0019318	hexose metabolic process	11/117	242/18800	3.34888e-07	6.98516e-06	4.24017e-06	AKT1/TP53/TNF/PMAIP1/BAD/PIK3CA/ATF4/STK11/IRS2/IRS1/PRKAA1	11
BP	GO:0034614	cellular response to reactive oxygen species	9/117	147/18800	3.44383e-07	7.13261e-06	4.32968e-06	AKT1/MAPK1/FOS/RIPK1/CHUK/MAPK8/RELA/ERN1/PRKAA1	9
BP	GO:0042593	glucose homeostasis	11/117	244/18800	3.63529e-07	7.4765e-06	4.53843e-06	AKT1/BAD/PIK3CA/ERN1/RAF1/STK11/PRKACA/IRS2/IRS1/PRKAA1/IGF1R	11
BP	GO:0033500	carbohydrate homeostasis	11/117	245/18800	3.78646e-07	7.73332e-06	4.69432e-06	AKT1/BAD/PIK3CA/ERN1/RAF1/STK11/PRKACA/IRS2/IRS1/PRKAA1/IGF1R	11
BP	GO:0043410	positive regulation of MAPK cascade	15/117	491/18800	3.97925e-07	8.0269e-06	4.87254e-06	GADD45A/TNF/RIPK1/HRAS/TRAF2/GADD45B/GADD45G/DAB2IP/ERN1/RAF1/MAP3K7/PTEN/HMGB1/TRAF6/IGF1R	15
BP	GO:1901653	cellular response to peptide	13/117	361/18800	3.98479e-07	8.0269e-06	4.87254e-06	AKT1/PIK3R3/TP53/TNF/RELA/PIK3CA/RPS6KB1/RAB8A/TSC2/IRS2/IRS1/PRKAA1/IGF1R	13
BP	GO:0036294	cellular response to decreased oxygen levels	9/117	151/18800	4.32423e-07	8.65139e-06	5.25162e-06	AKT1/TP53/PMAIP1/BAD/LMNA/ATF4/PTEN/TSC1/PRKAA1	9
BP	GO:0072594	establishment of protein localization to organelle	14/117	431/18800	4.81523e-07	9.56863e-06	5.80841e-06	AKT1/TP53/MAPK8/LMNA/BID/BBC3/BAX/NFKBIA/LAMP2/TSC2/SH3GLB1/SQSTM1/ATG13/PRKAA1	14
BP	GO:0051604	protein maturation	12/117	314/18800	6.12111e-07	1.2082e-05	7.33409e-06	CTSH/CASP8/CTSS/CTSL/CASP7/BAK1/BAD/CTSZ/CAPN2/PRKACB/PIK3C3/PRKACA	12
BP	GO:0032869	cellular response to insulin stimulus	10/117	205/18800	6.1778e-07	1.21126e-05	7.35267e-06	AKT1/PIK3R3/PIK3CA/RPS6KB1/RAB8A/TSC2/IRS2/IRS1/PRKAA1/IGF1R	10
BP	GO:0038202	TORC1 signaling	6/117	50/18800	6.48979e-07	1.23938e-05	7.52336e-06	STK11/RRAGA/RRAGB/RRAGC/RRAGD/RPTOR	6
BP	GO:0042149	cellular response to glucose starvation	6/117	50/18800	6.48979e-07	1.23938e-05	7.52336e-06	TP53/PMAIP1/ATF4/PIK3C3/SH3GLB1/PRKAA1	6
BP	GO:0070231	T cell apoptotic process	6/117	50/18800	6.48979e-07	1.23938e-05	7.52336e-06	AKT1/TP53/RIPK1/BAK1/FAS/BAX	6
BP	GO:2001238	positive regulation of extrinsic apoptotic signaling pathway	6/117	50/18800	6.48979e-07	1.23938e-05	7.52336e-06	TNF/RIPK1/PMAIP1/TRAF2/BID/PTEN	6
BP	GO:0032868	response to insulin	11/117	259/18800	6.56951e-07	1.24651e-05	7.56665e-06	AKT1/PIK3R3/PIK3CA/RPS6KB1/RAB8A/TSC2/TSC1/IRS2/IRS1/PRKAA1/IGF1R	11
BP	GO:0043523	regulation of neuron apoptotic process	10/117	207/18800	6.75212e-07	1.27295e-05	7.72712e-06	TP53/TNF/HRAS/MCL1/PIK3CA/KRAS/ATF4/BCL2L1/BAX/AKT1S1	10
BP	GO:0005996	monosaccharide metabolic process	11/117	261/18800	7.08752e-07	1.32767e-05	8.05929e-06	AKT1/TP53/TNF/PMAIP1/BAD/PIK3CA/ATF4/STK11/IRS2/IRS1/PRKAA1	11
BP	GO:1904019	epithelial cell apoptotic process	8/117	118/18800	7.31453e-07	1.36152e-05	8.26479e-06	EIF2S1/TNF/BAD/BID/DAB2IP/BCL2L1/PRKAA1/IGF1R	8
BP	GO:0045471	response to ethanol	8/117	119/18800	7.80137e-07	1.44301e-05	8.75943e-06	CASP8/ITPR2/TNF/BAK1/BAD/RPS6KB1/PRKAA1/IGF1R	8
BP	GO:0031330	negative regulation of cellular catabolic process	11/117	265/18800	8.23277e-07	1.51329e-05	9.18603e-06	AKT1/TP53/TRAF2/MCL1/PIK3CA/DAB2IP/RUBCN/RRAGA/TSC2/TSC1/ATG7	11
BP	GO:0072655	establishment of protein localization to mitochondrion	8/117	120/18800	8.31561e-07	1.51902e-05	9.22084e-06	AKT1/MAPK8/BID/BBC3/BAX/SH3GLB1/ATG13/PRKAA1	8
BP	GO:0097066	response to thyroid hormone	5/117	29/18800	9.02795e-07	1.63896e-05	9.94893e-06	CTSH/CTSS/CTSL/CTSB/STK11	5
BP	GO:0097194	execution phase of apoptosis	7/117	84/18800	9.20056e-07	1.66005e-05	1.00769e-05	AKT1/CASP8/TP53/CASP7/BCL2L1/BBC3/BAX	7
BP	GO:1900103	positive regulation of endoplasmic reticulum unfolded protein response	4/117	13/18800	9.75501e-07	1.74936e-05	1.06191e-05	BAK1/DAB2IP/BAX/ERN1	4
BP	GO:0071222	cellular response to lipopolysaccharide	10/117	217/18800	1.03818e-06	1.85048e-05	1.12329e-05	AKT1/MAPK1/TNF/MAPK8/RELA/DAB2IP/CAPN2/NFKBIA/HMGB1/TRAF6	10
BP	GO:0019886	antigen processing and presentation of exogenous peptide antigen via MHC class II	5/117	30/18800	1.07799e-06	1.90985e-05	1.15933e-05	CTSS/CTSL/CTSD/CTSV/TRAF6	5
BP	GO:0070585	protein localization to mitochondrion	8/117	125/18800	1.13437e-06	1.99771e-05	1.21266e-05	AKT1/MAPK8/BID/BBC3/BAX/SH3GLB1/ATG13/PRKAA1	8
BP	GO:2001242	regulation of intrinsic apoptotic signaling pathway	9/117	171/18800	1.22927e-06	2.15195e-05	1.30629e-05	AKT1/TP53/PMAIP1/BAD/MCL1/BID/BCL2L1/BBC3/BAX	9
BP	GO:0050852	T cell receptor signaling pathway	8/117	127/18800	1.27944e-06	2.2254e-05	1.35088e-05	MAPK1/RELA/HRAS/PIK3CA/PIK3CD/STK11/MAP3K7/TRAF6	8
BP	GO:0010332	response to gamma radiation	6/117	56/18800	1.28636e-06	2.2254e-05	1.35088e-05	TP53/BAK1/HRAS/BCL2L1/BAX/PRKAA1	6
BP	GO:0043254	regulation of protein complex assembly	13/117	401/18800	1.29747e-06	2.23149e-05	1.35458e-05	TP53/TNF/BAK1/TRAF2/BID/DAB2IP/SPTAN1/BAX/RAF1/SH3GLB1/HMGB1/AMBRA1/ULK1	13
BP	GO:0061709	reticulophagy	4/117	14/18800	1.35914e-06	2.31924e-05	1.40784e-05	ATG2A/ULK1/ULK2/ATG2B	4
BP	GO:0001776	leukocyte homeostasis	7/117	89/18800	1.36426e-06	2.31924e-05	1.40784e-05	AKT1/BAK1/PMAIP1/FAS/PIK3CD/BAX/HMGB1	7
BP	GO:0043434	response to peptide hormone	13/117	404/18800	1.40946e-06	2.38232e-05	1.44613e-05	AKT1/PIK3R3/RELA/PIK3CA/RPS6KB1/RAB8A/STK11/TSC2/TSC1/IRS2/IRS1/PRKAA1/IGF1R	13
BP	GO:0071219	cellular response to molecule of bacterial origin	10/117	229/18800	1.68979e-06	2.83981e-05	1.72384e-05	AKT1/MAPK1/TNF/MAPK8/RELA/DAB2IP/CAPN2/NFKBIA/HMGB1/TRAF6	10
BP	GO:0071333	cellular response to glucose stimulus	8/117	132/18800	1.713e-06	2.86247e-05	1.73759e-05	BAD/PIK3CA/ERN1/RAF1/PRKACA/IRS2/PRKAA1/IGF1R	8
BP	GO:0046686	response to cadmium ion	6/117	59/18800	1.75823e-06	2.90614e-05	1.7641e-05	AKT1/MAPK1/FOS/DAXX/CHUK/MAPK8	6
BP	GO:1901099	negative regulation of signal transduction in absence of ligand	5/117	33/18800	1.76878e-06	2.90614e-05	1.7641e-05	AKT1/TNF/RIPK1/MCL1/BCL2L1	5
BP	GO:2001240	negative regulation of extrinsic apoptotic signaling pathway in absence of ligand	5/117	33/18800	1.76878e-06	2.90614e-05	1.7641e-05	AKT1/TNF/RIPK1/MCL1/BCL2L1	5
BP	GO:0009266	response to temperature stimulus	9/117	180/18800	1.88199e-06	3.07496e-05	1.86658e-05	AKT1/CASP8/EIF2S1/FOS/DAXX/NFKBIA/RPS6KB1/PRKACA/PRKAA1	9
BP	GO:0071331	cellular response to hexose stimulus	8/117	134/18800	1.91848e-06	3.11726e-05	1.89226e-05	BAD/PIK3CA/ERN1/RAF1/PRKACA/IRS2/PRKAA1/IGF1R	8
BP	GO:0043506	regulation of JUN kinase activity	6/117	60/18800	1.94374e-06	3.14095e-05	1.90664e-05	TNF/TRAF2/DAB2IP/ERN1/MAP3K7/TRAF6	6
BP	GO:0010038	response to metal ion	12/117	351/18800	1.96661e-06	3.16055e-05	1.91853e-05	AKT1/MAPK1/CASP8/EIF2S1/FOS/DAXX/CHUK/MAPK8/BAD/ATF4/ATG5/PRKAA1	12
BP	GO:0002495	antigen processing and presentation of peptide antigen via MHC class II	5/117	34/18800	2.06348e-06	3.2982e-05	2.00209e-05	CTSS/CTSL/CTSD/CTSV/TRAF6	5
BP	GO:0071326	cellular response to monosaccharide stimulus	8/117	136/18800	2.14456e-06	3.40927e-05	2.06951e-05	BAD/PIK3CA/ERN1/RAF1/PRKACA/IRS2/PRKAA1/IGF1R	8
BP	GO:0071375	cellular response to peptide hormone stimulus	11/117	294/18800	2.26639e-06	3.58358e-05	2.17533e-05	AKT1/PIK3R3/RELA/PIK3CA/RPS6KB1/RAB8A/TSC2/IRS2/IRS1/PRKAA1/IGF1R	11
BP	GO:1905898	positive regulation of response to endoplasmic reticulum stress	5/117	35/18800	2.39547e-06	3.76742e-05	2.28692e-05	BAK1/PMAIP1/DAB2IP/BAX/ERN1	5
BP	GO:0044089	positive regulation of cellular component biogenesis	14/117	494/18800	2.4111e-06	3.77183e-05	2.2896e-05	TP53/TNF/BAK1/HRAS/PIK3CA/BID/DAB2IP/BAX/ATG2A/SH3GLB1/TSC1/AMBRA1/ULK1/WIPI1	14
BP	GO:0071478	cellular response to radiation	9/117	187/18800	2.57841e-06	4.01223e-05	2.43552e-05	GADD45A/EIF2S1/TP53/BAK1/HRAS/ATF4/BCL2L1/BAX/STK11	9
BP	GO:0034620	cellular response to unfolded protein	7/117	98/18800	2.61588e-06	4.04911e-05	2.45791e-05	EIF2S1/DAXX/BAK1/ATF4/DAB2IP/BAX/ERN1	7
BP	GO:0002504	antigen processing and presentation of peptide or polysaccharide antigen via MHC class II	5/117	36/18800	2.76806e-06	4.24004e-05	2.57381e-05	CTSS/CTSL/CTSD/CTSV/TRAF6	5
BP	GO:1903749	positive regulation of establishment of protein localization to mitochondrion	5/117	36/18800	2.76806e-06	4.24004e-05	2.57381e-05	MAPK8/BBC3/SH3GLB1/ATG13/PRKAA1	5
BP	GO:0009749	response to glucose	9/117	189/18800	2.81416e-06	4.28831e-05	2.60312e-05	BAD/PIK3CA/ERN1/RAF1/RPS6KB1/PRKACA/IRS2/PRKAA1/IGF1R	9
BP	GO:0031638	zymogen activation	6/117	64/18800	2.85259e-06	4.32447e-05	2.62507e-05	CTSH/CASP8/CTSL/BAK1/BAD/CTSZ	6
BP	GO:0010212	response to ionizing radiation	8/117	142/18800	2.96361e-06	4.46973e-05	2.71324e-05	GADD45A/TP53/BAK1/HRAS/BCL2L1/BAX/STK11/PRKAA1	8
BP	GO:0071248	cellular response to metal ion	9/117	191/18800	3.06823e-06	4.60392e-05	2.7947e-05	AKT1/MAPK1/EIF2S1/FOS/DAXX/CHUK/MAPK8/ATF4/PRKAA1	9
BP	GO:0034497	protein localization to phagophore assembly site	4/117	17/18800	3.1852e-06	4.73115e-05	2.87193e-05	PIK3C3/STX17/ATG13/WIPI1	4
BP	GO:0097067	cellular response to thyroid hormone stimulus	4/117	17/18800	3.1852e-06	4.73115e-05	2.87193e-05	CTSH/CTSS/CTSL/CTSB	4
BP	GO:0009746	response to hexose	9/117	193/18800	3.3418e-06	4.93882e-05	2.99799e-05	BAD/PIK3CA/ERN1/RAF1/RPS6KB1/PRKACA/IRS2/PRKAA1/IGF1R	9
BP	GO:0071900	regulation of protein serine/threonine kinase activity	12/117	372/18800	3.5798e-06	5.26409e-05	3.19544e-05	AKT1/ACTB/GADD45A/TNF/HRAS/TRAF2/DAB2IP/ERN1/MAP3K7/PTEN/TRAF6/RPTOR	12
BP	GO:0045936	negative regulation of phosphate metabolic process	13/117	440/18800	3.60401e-06	5.27334e-05	3.20105e-05	AKT1/GADD45A/TP53/TNF/BAK1/GADD45B/DAB2IP/BAX/RUBCN/PTEN/TSC2/IRS2/AKT1S1	13
BP	GO:0002478	antigen processing and presentation of exogenous peptide antigen	5/117	38/18800	3.64911e-06	5.31289e-05	3.22506e-05	CTSS/CTSL/CTSD/CTSV/TRAF6	5
BP	GO:0010563	negative regulation of phosphorus metabolic process	13/117	441/18800	3.69424e-06	5.3521e-05	3.24886e-05	AKT1/GADD45A/TP53/TNF/BAK1/GADD45B/DAB2IP/BAX/RUBCN/PTEN/TSC2/IRS2/AKT1S1	13
BP	GO:0071322	cellular response to carbohydrate stimulus	8/117	147/18800	3.836e-06	5.53023e-05	3.357e-05	BAD/PIK3CA/ERN1/RAF1/PRKACA/IRS2/PRKAA1/IGF1R	8
BP	GO:0050673	epithelial cell proliferation	13/117	443/18800	3.88073e-06	5.56743e-05	3.37958e-05	AKT1/MAPK1/TNF/BAD/HRAS/DAB2IP/PIK3CD/BAX/ERN1/STK11/PTEN/HMGB1/RPTOR	13
BP	GO:0097284	hepatocyte apoptotic process	4/117	18/18800	4.07561e-06	5.81862e-05	3.53205e-05	BID/BCL2L1/PRKAA1/IGF1R	4
BP	GO:1903829	positive regulation of cellular protein localization	13/117	446/18800	4.17613e-06	5.93334e-05	3.60169e-05	AKT1/TNF/MAPK8/BAD/HRAS/BBC3/STK11/SH3GLB1/PRKACA/SQSTM1/IRS2/ATG13/PRKAA1	13
BP	GO:0043550	regulation of lipid kinase activity	6/117	69/18800	4.44719e-06	6.28807e-05	3.81702e-05	PIK3R3/DAB2IP/RUBCN/NRBF2/IRS1/AMBRA1	6
BP	GO:0034284	response to monosaccharide	9/117	200/18800	4.47112e-06	6.29165e-05	3.8192e-05	BAD/PIK3CA/ERN1/RAF1/RPS6KB1/PRKACA/IRS2/PRKAA1/IGF1R	9
BP	GO:0019882	antigen processing and presentation	7/117	107/18800	4.70871e-06	6.59443e-05	4.00299e-05	CTSH/CTSS/CTSL/CTSD/CTSV/ATG5/TRAF6	7
BP	GO:0051090	regulation of DNA-binding transcription factor activity	13/117	452/18800	4.82738e-06	6.72859e-05	4.08443e-05	AKT1/TNF/RIPK1/CHUK/MAPK8/RELA/TRAF2/DAB2IP/TRADD/NFKBIA/MAP3K7/PTEN/TRAF6	13
BP	GO:2000786	positive regulation of autophagosome assembly	4/117	19/18800	5.13766e-06	7.12714e-05	4.32636e-05	ATG2A/SH3GLB1/ULK1/WIPI1	4
BP	GO:0045834	positive regulation of lipid metabolic process	8/117	153/18800	5.16178e-06	7.12714e-05	4.32636e-05	AKT1/TNF/CAPN2/IRS2/IRS1/AMBRA1/PRKAA1/IGF1R	8
BP	GO:0001678	cellular glucose homeostasis	8/117	154/18800	5.41664e-06	7.40946e-05	4.49773e-05	BAD/PIK3CA/ERN1/RAF1/PRKACA/IRS2/PRKAA1/IGF1R	8
BP	GO:0051092	positive regulation of NF-kappaB transcription factor activity	8/117	154/18800	5.41664e-06	7.40946e-05	4.49773e-05	TNF/RIPK1/CHUK/RELA/TRAF2/TRADD/MAP3K7/TRAF6	8
BP	GO:0010907	positive regulation of glucose metabolic process	5/117	42/18800	6.06283e-06	8.21695e-05	4.9879e-05	AKT1/PMAIP1/STK11/IRS2/IRS1	5
BP	GO:0070266	necroptotic process	5/117	42/18800	6.06283e-06	8.21695e-05	4.9879e-05	CASP8/TP53/TNF/RIPK1/FAS	5
BP	GO:0071902	positive regulation of protein serine/threonine kinase activity	9/117	208/18800	6.14927e-06	8.29587e-05	5.03581e-05	AKT1/TNF/HRAS/TRAF2/DAB2IP/ERN1/MAP3K7/TRAF6/RPTOR	9
BP	GO:0051091	positive regulation of DNA-binding transcription factor activity	10/117	265/18800	6.20414e-06	8.31209e-05	5.04565e-05	AKT1/TNF/RIPK1/CHUK/RELA/TRAF2/TRADD/MAP3K7/PTEN/TRAF6	10
BP	GO:1902107	positive regulation of leukocyte differentiation	8/117	157/18800	6.24608e-06	8.31209e-05	5.04565e-05	CASP8/FOS/TNF/RIPK1/BAD/HMGB1/AMBRA1/TRAF6	8
BP	GO:1903708	positive regulation of hemopoiesis	8/117	157/18800	6.24608e-06	8.31209e-05	5.04565e-05	CASP8/FOS/TNF/RIPK1/BAD/HMGB1/AMBRA1/TRAF6	8
BP	GO:0002456	T cell mediated immunity	7/117	112/18800	6.37674e-06	8.39341e-05	5.09502e-05	CTSH/PRF1/CTSC/TRAF2/MAP3K7/HMGB1/TRAF6	7
BP	GO:0036498	IRE1-mediated unfolded protein response	4/117	20/18800	6.39126e-06	8.39341e-05	5.09502e-05	BAK1/DAB2IP/BAX/ERN1	4
BP	GO:1901215	negative regulation of neuron death	9/117	209/18800	6.39281e-06	8.39341e-05	5.09502e-05	AKT1/HRAS/TRAF2/PIK3CA/KRAS/ATF4/BCL2L1/BAX/TSC1	9
BP	GO:0035924	cellular response to vascular endothelial growth factor stimulus	6/117	74/18800	6.7009e-06	8.75882e-05	5.31683e-05	AKT1/RELA/PIK3CA/DAB2IP/PIK3CD/ERN1	6
BP	GO:0045860	positive regulation of protein kinase activity	12/117	396/18800	6.76503e-06	8.80351e-05	5.34396e-05	AKT1/TNF/DAXX/HRAS/TRAF2/PIK3CA/DAB2IP/ERN1/STK11/MAP3K7/TRAF6/RPTOR	12
BP	GO:0051348	negative regulation of transferase activity	10/117	270/18800	7.3112e-06	9.47236e-05	5.74997e-05	AKT1/GADD45A/TP53/GADD45B/DAB2IP/RUBCN/PTEN/TSC2/IRS2/AKT1S1	10
BP	GO:0018107	peptidyl-threonine phosphorylation	7/117	115/18800	7.59459e-06	9.79636e-05	5.94664e-05	AKT1/MAPK1/MAPK8/STK11/PRKACA/ULK1/RPTOR	7
BP	GO:1903432	regulation of TORC1 signaling	5/117	44/18800	7.66373e-06	9.79958e-05	5.9486e-05	STK11/RRAGA/RRAGB/RRAGC/RRAGD	5
BP	GO:2001239	regulation of extrinsic apoptotic signaling pathway in absence of ligand	5/117	44/18800	7.66373e-06	9.79958e-05	5.9486e-05	AKT1/TNF/RIPK1/MCL1/BCL2L1	5
BP	GO:0030968	endoplasmic reticulum unfolded protein response	6/117	76/18800	7.82837e-06	9.91763e-05	6.02026e-05	EIF2S1/BAK1/ATF4/DAB2IP/BAX/ERN1	6
BP	GO:0036092	phosphatidylinositol-3-phosphate biosynthetic process	4/117	21/18800	7.85721e-06	9.91763e-05	6.02026e-05	PIK3R3/PIK3CA/PIK3CD/PIK3C3	4
BP	GO:0044090	positive regulation of vacuole organization	4/117	21/18800	7.85721e-06	9.91763e-05	6.02026e-05	ATG2A/SH3GLB1/ULK1/WIPI1	4
BP	GO:0043406	positive regulation of MAP kinase activity	7/117	116/18800	8.0411e-06	0.000101064	6.13482e-05	TNF/HRAS/TRAF2/DAB2IP/ERN1/MAP3K7/TRAF6	7
BP	GO:0001819	positive regulation of cytokine production	13/117	475/18800	8.23611e-06	0.000103074	6.25686e-05	CASP8/TNF/RIPK1/CHUK/RELA/HRAS/TRAF2/ATF4/PIK3CD/RAB1A/MAP3K7/HMGB1/TRAF6	13
BP	GO:0045913	positive regulation of carbohydrate metabolic process	6/117	77/18800	8.44714e-06	0.000104823	6.36302e-05	AKT1/PMAIP1/STK11/IRS2/IRS1/PRKAA1	6
BP	GO:1903201	regulation of oxidative stress-induced cell death	6/117	77/18800	8.44714e-06	0.000104823	6.36302e-05	AKT1/TNF/RIPK1/MCL1/ATF4/TSC1	6
BP	GO:0035967	cellular response to topologically incorrect protein	7/117	117/18800	8.50919e-06	0.000105149	6.38283e-05	EIF2S1/DAXX/BAK1/ATF4/DAB2IP/BAX/ERN1	7
BP	GO:0019216	regulation of lipid metabolic process	11/117	339/18800	8.81404e-06	0.000108461	6.58384e-05	AKT1/TNF/DAB2IP/CAPN2/RUBCN/IRS2/IRS1/AMBRA1/MTMR4/PRKAA1/IGF1R	11
BP	GO:0044346	fibroblast apoptotic process	4/117	22/18800	9.5572e-06	0.000116396	7.06556e-05	TP53/BAK1/PIK3CA/BID	4
BP	GO:0032007	negative regulation of TOR signaling	5/117	46/18800	9.57767e-06	0.000116396	7.06556e-05	STK11/TSC2/TSC1/AKT1S1/PRKAA1	5
BP	GO:0035794	positive regulation of mitochondrial membrane permeability	5/117	46/18800	9.57767e-06	0.000116396	7.06556e-05	TP53/MAPK8/BID/BBC3/BAX	5
BP	GO:0043542	endothelial cell migration	10/117	279/18800	9.73862e-06	0.000117865	7.15473e-05	AKT1/GADD45A/PIK3R3/TNF/PIK3CA/DAB2IP/PIK3CD/RRAS/PTEN/HMGB1	10
BP	GO:0046323	glucose import	6/117	79/18800	9.80365e-06	0.000118166	7.17299e-05	AKT1/TNF/RPS6KB1/TSC1/IRS2/IRS1	6
BP	GO:0019884	antigen processing and presentation of exogenous antigen	5/117	47/18800	1.06649e-05	0.000128022	7.77126e-05	CTSS/CTSL/CTSD/CTSV/TRAF6	5
BP	GO:0002224	toll-like receptor signaling pathway	7/117	123/18800	1.18181e-05	0.000140481	8.52758e-05	CTSS/TNF/DAB2IP/NFKBIA/MAP3K7/HMGB1/TRAF6	7
BP	GO:0010906	regulation of glucose metabolic process	7/117	123/18800	1.18181e-05	0.000140481	8.52758e-05	AKT1/TP53/PMAIP1/BAD/STK11/IRS2/IRS1	7
BP	GO:1902108	regulation of mitochondrial membrane permeability involved in apoptotic process	5/117	48/18800	1.18461e-05	0.000140481	8.52758e-05	TP53/MAPK8/BID/BBC3/BAX	5
BP	GO:0009743	response to carbohydrate	9/117	226/18800	1.19927e-05	0.000141649	8.59847e-05	BAD/PIK3CA/ERN1/RAF1/RPS6KB1/PRKACA/IRS2/PRKAA1/IGF1R	9
BP	GO:0001666	response to hypoxia	10/117	286/18800	1.20807e-05	0.000142117	8.6269e-05	ITPR2/TP53/TNF/ITPR1/PMAIP1/BAD/LMNA/CAPN2/PTEN/PRKAA1	10
BP	GO:1905897	regulation of response to endoplasmic reticulum stress	6/117	82/18800	1.21644e-05	0.00014228	8.63676e-05	BAK1/PMAIP1/DAB2IP/BCL2L1/BAX/ERN1	6
BP	GO:1905475	regulation of protein localization to membrane	8/117	172/18800	1.21913e-05	0.00014228	8.63676e-05	AKT1/ACTB/TNF/MAPK8/HRAS/BCL2L1/BBC3/SQSTM1	8
BP	GO:0018210	peptidyl-threonine modification	7/117	124/18800	1.24613e-05	0.000144857	8.79319e-05	AKT1/MAPK1/MAPK8/STK11/PRKACA/ULK1/RPTOR	7
BP	GO:0051223	regulation of protein transport	13/117	495/18800	1.2775e-05	0.000147919	8.97904e-05	TNF/MAPK8/BAD/HRAS/BBC3/RAB8A/PIK3C3/SH3GLB1/PRKACA/IRS2/IRS1/ATG13/PRKAA1	13
BP	GO:0035094	response to nicotine	5/117	49/18800	1.3127e-05	0.000150879	9.15873e-05	MAPK1/TNF/BAD/RELA/IGF1R	5
BP	GO:0043244	regulation of protein complex disassembly	7/117	125/18800	1.31333e-05	0.000150879	9.15873e-05	TNF/PIK3CA/SPTAN1/RUBCN/ATG12/ATG5/IGF1R	7
BP	GO:0002221	pattern recognition receptor signaling pathway	8/117	176/18800	1.44089e-05	0.000164804	0.00010004	CTSS/TNF/RELA/DAB2IP/NFKBIA/MAP3K7/HMGB1/TRAF6	8
BP	GO:0060425	lung morphogenesis	5/117	50/18800	1.45135e-05	0.000164804	0.00010004	CTSH/MAPK1/TNF/KRAS/CTSZ	5
BP	GO:1903747	regulation of establishment of protein localization to mitochondrion	5/117	50/18800	1.45135e-05	0.000164804	0.00010004	MAPK8/BBC3/SH3GLB1/ATG13/PRKAA1	5
BP	GO:0010631	epithelial cell migration	11/117	358/18800	1.46765e-05	0.000166014	0.000100775	AKT1/CTSH/GADD45A/PIK3R3/TNF/PIK3CA/DAB2IP/PIK3CD/RRAS/PTEN/HMGB1	11
BP	GO:0051222	positive regulation of protein transport	10/117	293/18800	1.48936e-05	0.000167825	0.000101874	TNF/MAPK8/BAD/HRAS/BBC3/SH3GLB1/PRKACA/IRS2/ATG13/PRKAA1	10
BP	GO:0042542	response to hydrogen peroxide	7/117	128/18800	1.53315e-05	0.000172099	0.000104469	RIPK1/BAK1/BAD/RELA/CAPN2/ERN1/PRKAA1	7
BP	GO:0090132	epithelium migration	11/117	361/18800	1.58592e-05	0.000177029	0.000107461	AKT1/CTSH/GADD45A/PIK3R3/TNF/PIK3CA/DAB2IP/PIK3CD/RRAS/PTEN/HMGB1	11
BP	GO:0009409	response to cold	5/117	51/18800	1.60115e-05	0.000177029	0.000107461	CASP8/FOS/NFKBIA/PRKACA/PRKAA1	5
BP	GO:0010823	negative regulation of mitochondrion organization	5/117	51/18800	1.60115e-05	0.000177029	0.000107461	AKT1/TP53/LMNA/BCL2L1/TSC2	5
BP	GO:1905710	positive regulation of membrane permeability	5/117	51/18800	1.60115e-05	0.000177029	0.000107461	TP53/MAPK8/BID/BBC3/BAX	5
BP	GO:1903131	mononuclear cell differentiation	12/117	433/18800	1.654e-05	0.000182188	0.000110593	CTSL/TP53/BAK1/BAD/PIK3CD/BAX/STK11/ATG5/TSC1/HMGB1/AMBRA1/TRAF6	12
BP	GO:0033673	negative regulation of kinase activity	9/117	236/18800	1.6931e-05	0.000185799	0.000112785	AKT1/GADD45A/GADD45B/DAB2IP/RUBCN/PTEN/TSC2/IRS2/AKT1S1	9
BP	GO:0043525	positive regulation of neuron apoptotic process	5/117	52/18800	1.76273e-05	0.00019272	0.000116986	TP53/TNF/MCL1/ATF4/BAX	5
BP	GO:0090130	tissue migration	11/117	366/18800	1.80149e-05	0.000196229	0.000119116	AKT1/CTSH/GADD45A/PIK3R3/TNF/PIK3CA/DAB2IP/PIK3CD/RRAS/PTEN/HMGB1	11
BP	GO:0034644	cellular response to UV	6/117	88/18800	1.82644e-05	0.000198213	0.00012032	EIF2S1/TP53/BAK1/ATF4/BAX/STK11	6
BP	GO:0006109	regulation of carbohydrate metabolic process	8/117	183/18800	1.91075e-05	0.000206415	0.000125299	AKT1/TP53/PMAIP1/BAD/STK11/IRS2/IRS1/PRKAA1	8
BP	GO:0001783	B cell apoptotic process	4/117	26/18800	1.91606e-05	0.000206415	0.000125299	BAK1/BAX/PTEN/IRS2	4
BP	GO:0006661	phosphatidylinositol biosynthetic process	7/117	134/18800	2.0646e-05	0.0002208	0.000134031	PIK3R3/PIK3CA/PIK3CD/PTEN/MTMR14/PIK3C3/MTMR4	7
BP	GO:0043467	regulation of generation of precursor metabolites and energy	7/117	134/18800	2.0646e-05	0.0002208	0.000134031	AKT1/TP53/TNF/PIK3CA/IRS2/IRS1/PRKAA1	7
BP	GO:0050851	antigen receptor-mediated signaling pathway	9/117	244/18800	2.20411e-05	0.000234866	0.00014257	MAPK1/RELA/HRAS/PIK3CA/PIK3CD/BAX/STK11/MAP3K7/TRAF6	9
BP	GO:0051896	regulation of protein kinase B signaling	8/117	187/18800	2.23278e-05	0.000237062	0.000143903	TNF/PIK3CA/PIK3CD/STK11/RRAS/PTEN/TSC2/IGF1R	8
BP	GO:0002763	positive regulation of myeloid leukocyte differentiation	5/117	55/18800	2.32464e-05	0.000245927	0.000149284	CASP8/FOS/TNF/RIPK1/TRAF6	5
BP	GO:1904951	positive regulation of establishment of protein localization	10/117	309/18800	2.35169e-05	0.000247378	0.000150165	TNF/MAPK8/BAD/HRAS/BBC3/SH3GLB1/PRKACA/IRS2/ATG13/PRKAA1	10
BP	GO:1900407	regulation of cellular response to oxidative stress	6/117	92/18800	2.35518e-05	0.000247378	0.000150165	AKT1/TNF/RIPK1/MCL1/ATF4/TSC1	6
BP	GO:1901654	response to ketone	8/117	190/18800	2.50317e-05	0.000261987	0.000159033	AKT1/FOS/BAD/PIK3CA/BCL2L1/RPS6KB1/PRKAA1/IGF1R	8
BP	GO:0010676	positive regulation of cellular carbohydrate metabolic process	5/117	56/18800	2.53993e-05	0.000264892	0.000160796	AKT1/PMAIP1/STK11/IRS2/IRS1	5
BP	GO:0006986	response to unfolded protein	7/117	139/18800	2.61603e-05	0.000271864	0.000165028	EIF2S1/DAXX/BAK1/ATF4/DAB2IP/BAX/ERN1	7
BP	GO:0030098	lymphocyte differentiation	11/117	382/18800	2.67121e-05	0.000274686	0.000166742	CTSL/TP53/BAK1/BAD/PIK3CD/BAX/STK11/ATG5/TSC1/HMGB1/AMBRA1	11
BP	GO:0042326	negative regulation of phosphorylation	11/117	382/18800	2.67121e-05	0.000274686	0.000166742	AKT1/GADD45A/BAK1/GADD45B/DAB2IP/BAX/RUBCN/PTEN/TSC2/IRS2/AKT1S1	11
BP	GO:0050678	regulation of epithelial cell proliferation	11/117	382/18800	2.67121e-05	0.000274686	0.000166742	AKT1/TNF/BAD/HRAS/DAB2IP/PIK3CD/BAX/STK11/PTEN/HMGB1/RPTOR	11
BP	GO:0038066	p38MAPK cascade	5/117	57/18800	2.7704e-05	0.000282908	0.000171733	GADD45A/GADD45B/GADD45G/DAB2IP/MAP3K7	5
BP	GO:0043551	regulation of phosphatidylinositol 3-kinase activity	5/117	57/18800	2.7704e-05	0.000282908	0.000171733	PIK3R3/DAB2IP/RUBCN/IRS1/AMBRA1	5
BP	GO:0048661	positive regulation of smooth muscle cell proliferation	6/117	95/18800	2.82743e-05	0.000287733	0.000174661	AKT1/TNF/PIK3CA/ERN1/RPS6KB1/IGF1R	6
BP	GO:0031334	positive regulation of protein complex assembly	8/117	194/18800	2.90596e-05	0.000294704	0.000178893	TP53/TNF/BAK1/BID/DAB2IP/BAX/SH3GLB1/AMBRA1	8
BP	GO:0060441	epithelial tube branching involved in lung morphogenesis	4/117	29/18800	3.00048e-05	0.000301274	0.000182881	CTSH/TNF/KRAS/CTSZ	4
BP	GO:1903203	regulation of oxidative stress-induced neuron death	4/117	29/18800	3.00048e-05	0.000301274	0.000182881	TNF/MCL1/ATF4/TSC1	4
BP	GO:0032147	activation of protein kinase activity	7/117	142/18800	3.00147e-05	0.000301274	0.000182881	DAXX/TRAF2/PIK3CA/STK11/MAP3K7/TRAF6/RPTOR	7
BP	GO:0060249	anatomical structure homeostasis	10/117	319/18800	3.08456e-05	0.000308561	0.000187304	CTSH/ACTB/CTSK/KRAS/BAX/STK11/LAMP2/TP53INP2/TRAF6/PRKAA1	10
BP	GO:0032388	positive regulation of intracellular transport	8/117	198/18800	3.36168e-05	0.000334927	0.000203309	MAPK8/HRAS/BBC3/STK11/SH3GLB1/PRKACA/ATG13/PRKAA1	8
BP	GO:0036473	cell death in response to oxidative stress	6/117	98/18800	3.37299e-05	0.000334927	0.000203309	AKT1/TNF/RIPK1/MCL1/ATF4/TSC1	6
BP	GO:0009615	response to virus	11/117	392/18800	3.38229e-05	0.000334927	0.000203309	TNF/PRF1/PMAIP1/CHUK/RELA/BCL2L1/BAX/MAP3K14/ATG12/ATG5/ATG7	11
BP	GO:1900101	regulation of endoplasmic reticulum unfolded protein response	4/117	30/18800	3.44551e-05	0.000340042	0.000206414	BAK1/DAB2IP/BAX/ERN1	4
BP	GO:0046324	regulation of glucose import	5/117	60/18800	3.56034e-05	0.000350199	0.00021258	AKT1/TNF/RPS6KB1/IRS2/IRS1	5
BP	GO:0062013	positive regulation of small molecule metabolic process	7/117	146/18800	3.58699e-05	0.000351645	0.000213457	AKT1/TNF/PMAIP1/STK11/IRS2/IRS1/PRKAA1	7
BP	GO:0010918	positive regulation of mitochondrial membrane potential	3/117	11/18800	3.73763e-05	0.000363986	0.000220949	AKT1/BAD/BID	3
BP	GO:0031642	negative regulation of myelination	3/117	11/18800	3.73763e-05	0.000363986	0.000220949	TNF/CTSC/PTEN	3
BP	GO:0050994	regulation of lipid catabolic process	5/117	61/18800	3.85907e-05	0.000374572	0.000227375	AKT1/TNF/IRS2/IRS1/PRKAA1	5
BP	GO:0002768	immune response-regulating cell surface receptor signaling pathway	10/117	328/18800	3.90356e-05	0.000376406	0.000228488	MAPK1/MAPK8/RELA/HRAS/PIK3CA/PIK3CD/BAX/STK11/MAP3K7/TRAF6	10
BP	GO:0060562	epithelial tube morphogenesis	10/117	328/18800	3.90356e-05	0.000376406	0.000228488	CTSH/TNF/KRAS/CTSZ/PIK3CD/PRKACB/TSC2/PRKACA/TSC1/TRAF6	10
BP	GO:0033137	negative regulation of peptidyl-serine phosphorylation	4/117	31/18800	3.93701e-05	0.00037839	0.000229693	GADD45A/BAK1/BAX/PTEN	4
BP	GO:0030217	T cell differentiation	9/117	263/18800	3.96627e-05	0.000379961	0.000230646	CTSL/TP53/BAD/PIK3CD/STK11/ATG5/TSC1/HMGB1/AMBRA1	9
BP	GO:1902882	regulation of response to oxidative stress	6/117	101/18800	4.00005e-05	0.000381953	0.000231855	AKT1/TNF/RIPK1/MCL1/ATF4/TSC1	6
BP	GO:0031663	lipopolysaccharide-mediated signaling pathway	5/117	62/18800	4.17686e-05	0.000396263	0.000240542	AKT1/MAPK1/TNF/NFKBIA/TRAF6	5
BP	GO:0032757	positive regulation of interleukin-8 production	5/117	62/18800	4.17686e-05	0.000396263	0.000240542	TNF/RIPK1/RELA/RAB1A/HMGB1	5
BP	GO:0010675	regulation of cellular carbohydrate metabolic process	7/117	150/18800	4.26331e-05	0.000403164	0.000244731	AKT1/TP53/PMAIP1/BAD/STK11/IRS2/IRS1	7
BP	GO:1905477	positive regulation of protein localization to membrane	6/117	103/18800	4.46765e-05	0.000421134	0.000255639	AKT1/TNF/MAPK8/HRAS/BBC3/SQSTM1	6
BP	GO:0048002	antigen processing and presentation of peptide antigen	5/117	63/18800	4.51454e-05	0.000424193	0.000257496	CTSS/CTSL/CTSD/CTSV/TRAF6	5
BP	GO:0035148	tube formation	7/117	152/18800	4.63878e-05	0.000434479	0.00026374	DAB2IP/PIK3CD/PRKACB/TSC2/PRKACA/TSC1/TRAF6	7
BP	GO:0006995	cellular response to nitrogen starvation	3/117	12/18800	4.96089e-05	0.000458804	0.000278506	ATG5/MAP1LC3B/ATG7	3
BP	GO:0043562	cellular response to nitrogen levels	3/117	12/18800	4.96089e-05	0.000458804	0.000278506	ATG5/MAP1LC3B/ATG7	3
BP	GO:1901524	regulation of mitophagy	3/117	12/18800	4.96089e-05	0.000458804	0.000278506	TP53/TSC2/AMBRA1	3
BP	GO:1990253	cellular response to leucine starvation	3/117	12/18800	4.96089e-05	0.000458804	0.000278506	ATF4/RRAGB/RRAGD	3
BP	GO:0036475	neuron death in response to oxidative stress	4/117	33/18800	5.07113e-05	0.00046753	0.000283803	TNF/MCL1/ATF4/TSC1	4
BP	GO:0002260	lymphocyte homeostasis	5/117	65/18800	5.25297e-05	0.000482781	0.000293061	AKT1/BAK1/PMAIP1/FAS/BAX	5
BP	GO:0090316	positive regulation of intracellular protein transport	7/117	156/18800	5.47127e-05	0.000501277	0.000304288	MAPK8/HRAS/BBC3/SH3GLB1/PRKACA/ATG13/PRKAA1	7
BP	GO:0046474	glycerophospholipid biosynthetic process	8/117	214/18800	5.82777e-05	0.000532282	0.000323109	PIK3R3/PIK3CA/CAPN2/PIK3CD/PTEN/MTMR14/PIK3C3/MTMR4	8
BP	GO:0035966	response to topologically incorrect protein	7/117	160/18800	6.42235e-05	0.00058338	0.000354127	EIF2S1/DAXX/BAK1/ATF4/DAB2IP/BAX/ERN1	7
BP	GO:0097345	mitochondrial outer membrane permeabilization	4/117	35/18800	6.4269e-05	0.00058338	0.000354127	MAPK8/BID/BBC3/BAX	4
BP	GO:0046488	phosphatidylinositol metabolic process	7/117	162/18800	6.94626e-05	0.000628583	0.000381566	PIK3R3/PIK3CA/PIK3CD/PTEN/MTMR14/PIK3C3/MTMR4	7
BP	GO:1904659	glucose transmembrane transport	6/117	113/18800	7.50633e-05	0.000677182	0.000411067	AKT1/TNF/RPS6KB1/TSC1/IRS2/IRS1	6
BP	GO:0048732	gland development	11/117	431/18800	7.94148e-05	0.000714247	0.000433567	CAPN1/AKT1/MAPK1/TNF/RELA/PIK3CA/BAX/RAF1/STK11/PTEN/IRS2	11
BP	GO:0046627	negative regulation of insulin receptor signaling pathway	4/117	37/18800	8.02926e-05	0.000717752	0.000435694	RPS6KB1/TSC2/IRS1/PRKAA1	4
BP	GO:0048009	insulin-like growth factor receptor signaling pathway	4/117	37/18800	8.02926e-05	0.000717752	0.000435694	AKT1/TSC2/IRS1/IGF1R	4
BP	GO:1903894	regulation of IRE1-mediated unfolded protein response	3/117	14/18800	8.1337e-05	0.000724885	0.000440024	BAK1/DAB2IP/BAX	3
BP	GO:0010632	regulation of epithelial cell migration	9/117	290/18800	8.42149e-05	0.000748266	0.000454217	AKT1/CTSH/GADD45A/TNF/DAB2IP/PIK3CD/RRAS/PTEN/HMGB1	9
BP	GO:0008645	hexose transmembrane transport	6/117	117/18800	9.10658e-05	0.0008067	0.000489688	AKT1/TNF/RPS6KB1/TSC1/IRS2/IRS1	6
BP	GO:0048660	regulation of smooth muscle cell proliferation	7/117	170/18800	9.40347e-05	0.000830498	0.000504134	AKT1/TNF/PIK3CA/ERN1/RPS6KB1/PTEN/IGF1R	7
BP	GO:0051098	regulation of binding	10/117	366/18800	9.73274e-05	0.000857006	0.000520225	AKT1/ACTB/EIF2S1/MAPK8/CTSZ/BAX/NFKBIA/PRKACA/HMGB1/TRAF6	10
BP	GO:0043029	T cell homeostasis	4/117	39/18800	9.90403e-05	0.000866897	0.000526229	AKT1/PMAIP1/FAS/BAX	4
BP	GO:1900077	negative regulation of cellular response to insulin stimulus	4/117	39/18800	9.90403e-05	0.000866897	0.000526229	RPS6KB1/TSC2/IRS1/PRKAA1	4
BP	GO:0015749	monosaccharide transmembrane transport	6/117	119/18800	0.000100026	0.000872926	0.000529889	AKT1/TNF/RPS6KB1/TSC1/IRS2/IRS1	6
BP	GO:0045725	positive regulation of glycogen biosynthetic process	3/117	15/18800	0.00010121	0.000880648	0.000534576	AKT1/IRS2/IRS1	3
BP	GO:0048659	smooth muscle cell proliferation	7/117	173/18800	0.000104901	0.000910069	0.000552436	AKT1/TNF/PIK3CA/ERN1/RPS6KB1/PTEN/IGF1R	7
BP	GO:0048771	tissue remodeling	7/117	174/18800	0.000108742	0.000934301	0.000567145	CAPN1/CTSK/TP53/BAK1/BAX/ATG5/TRAF6	7
BP	GO:0002429	immune response-activating cell surface receptor signaling pathway	9/117	300/18800	0.000108965	0.000934301	0.000567145	MAPK1/RELA/HRAS/PIK3CA/PIK3CD/BAX/STK11/MAP3K7/TRAF6	9
BP	GO:0002757	immune response-activating signal transduction	9/117	300/18800	0.000108965	0.000934301	0.000567145	MAPK1/RELA/HRAS/PIK3CA/PIK3CD/BAX/STK11/MAP3K7/TRAF6	9
BP	GO:0031647	regulation of protein stability	9/117	300/18800	0.000108965	0.000934301	0.000567145	CTSH/MAPK1/TP53/LMNA/KRAS/PTEN/LAMP2/SH3GLB1/TSC1	9
BP	GO:0071482	cellular response to light stimulus	6/117	121/18800	0.000109673	0.000937644	0.000569174	EIF2S1/TP53/BAK1/ATF4/BAX/STK11	6
BP	GO:0043154	negative regulation of cysteine-type endopeptidase activity involved in apoptotic process	5/117	77/18800	0.000118413	0.00100943	0.000612751	AKT1/BIRC5/TNF/RAF1/IGBP1	5
BP	GO:1902110	positive regulation of mitochondrial membrane permeability involved in apoptotic process	4/117	41/18800	0.000120778	0.00102518	0.00062231	MAPK8/BID/BBC3/BAX	4
BP	GO:0001659	temperature homeostasis	7/117	177/18800	0.000120958	0.00102518	0.00062231	TNF/ATF4/GADD45G/RHEB/STK11/SQSTM1/IGF1R	7
BP	GO:0018410	C-terminal protein amino acid modification	3/117	16/18800	0.000124002	0.00103605	0.000628907	ATG12/ATG5/ATG7	3
BP	GO:0045838	positive regulation of membrane potential	3/117	16/18800	0.000124002	0.00103605	0.000628907	AKT1/BAD/BID	3
BP	GO:0070242	thymocyte apoptotic process	3/117	16/18800	0.000124002	0.00103605	0.000628907	TP53/BAK1/BAX	3
BP	GO:0070875	positive regulation of glycogen metabolic process	3/117	16/18800	0.000124002	0.00103605	0.000628907	AKT1/IRS2/IRS1	3
BP	GO:1901096	regulation of autophagosome maturation	3/117	16/18800	0.000124002	0.00103605	0.000628907	RUBCN/ATG12/ATG5	3
BP	GO:1904375	regulation of protein localization to cell periphery	6/117	124/18800	0.000125517	0.00104573	0.000634788	AKT1/ACTB/TNF/HRAS/BCL2L1/SQSTM1	6
BP	GO:0010827	regulation of glucose transmembrane transport	5/117	78/18800	0.0001259	0.00104597	0.000634929	AKT1/TNF/RPS6KB1/IRS2/IRS1	5
BP	GO:0030574	collagen catabolic process	4/117	42/18800	0.000132853	0.00110062	0.000668107	CTSK/CTSS/CTSL/CTSB	4
BP	GO:1902117	positive regulation of organelle assembly	5/117	80/18800	0.000141958	0.00117275	0.000711888	TNF/ATG2A/SH3GLB1/ULK1/WIPI1	5
BP	GO:1902686	mitochondrial outer membrane permeabilization involved in programmed cell death	4/117	43/18800	0.000145779	0.00120094	0.000729003	MAPK8/BID/BBC3/BAX	4
BP	GO:0043405	regulation of MAP kinase activity	7/117	183/18800	0.00014874	0.00122191	0.000741734	TNF/HRAS/TRAF2/DAB2IP/ERN1/MAP3K7/TRAF6	7
BP	GO:1903039	positive regulation of leukocyte cell-cell adhesion	8/117	245/18800	0.000149163	0.00122198	0.000741771	AKT1/TNF/BAD/RELA/PIK3CA/HMGB1/AMBRA1/TRAF6	8
BP	GO:0044539	long-chain fatty acid import	3/117	17/18800	0.000149891	0.00122313	0.000742471	AKT1/RPS6KB1/IRS2	3
BP	GO:0002253	activation of immune response	10/117	386/18800	0.00015034	0.00122313	0.000742471	MAPK1/RELA/HRAS/PIK3CA/PIK3CD/BAX/STK11/MAP3K7/HMGB1/TRAF6	10
BP	GO:0006446	regulation of translational initiation	5/117	81/18800	0.000150552	0.00122313	0.000742471	EIF2S1/TNF/ATF4/RPS6KB1/RPS6KB2	5
BP	GO:0034219	carbohydrate transmembrane transport	6/117	131/18800	0.000169584	0.00137396	0.00083403	AKT1/TNF/RPS6KB1/TSC1/IRS2/IRS1	6
BP	GO:0006984	ER-nucleus signaling pathway	4/117	45/18800	0.000174323	0.00140078	0.00085031	EIF2S1/TP53/ATF4/ATG10	4
BP	GO:1902895	positive regulation of pri-miRNA transcription by RNA polymerase II	4/117	45/18800	0.000174323	0.00140078	0.00085031	FOS/TP53/TNF/RELA	4
BP	GO:2000785	regulation of autophagosome assembly	4/117	45/18800	0.000174323	0.00140078	0.00085031	ATG2A/SH3GLB1/ULK1/WIPI1	4
BP	GO:0035270	endocrine system development	6/117	132/18800	0.000176768	0.00141655	0.000859884	AKT1/MAPK1/BAK1/BAD/RAF1/RHEB	6
BP	GO:0007250	activation of NF-kappaB-inducing kinase activity	3/117	18/18800	0.000179054	0.00142709	0.000866282	TRAF2/MAP3K7/TRAF6	3
BP	GO:0140354	NA	3/117	18/18800	0.000179054	0.00142709	0.000866282	AKT1/RPS6KB1/IRS2	3
BP	GO:0045017	glycerolipid biosynthetic process	8/117	253/18800	0.000185802	0.00147687	0.000896501	PIK3R3/PIK3CA/CAPN2/PIK3CD/PTEN/MTMR14/PIK3C3/MTMR4	8
BP	GO:0046889	positive regulation of lipid biosynthetic process	5/117	85/18800	0.000188971	0.00148998	0.000904458	AKT1/TNF/CAPN2/PRKAA1/IGF1R	5
BP	GO:2000106	regulation of leukocyte apoptotic process	5/117	85/18800	0.000188971	0.00148998	0.000904458	TP53/PIK3CD/BAX/PTEN/IRS2	5
BP	GO:2000117	negative regulation of cysteine-type endopeptidase activity	5/117	85/18800	0.000188971	0.00148998	0.000904458	AKT1/BIRC5/TNF/RAF1/IGBP1	5
BP	GO:0031018	endocrine pancreas development	4/117	46/18800	0.000190014	0.00149021	0.000904598	AKT1/BAK1/BAD/RHEB	4
BP	GO:1900744	regulation of p38MAPK cascade	4/117	46/18800	0.000190014	0.00149021	0.000904598	GADD45A/GADD45B/GADD45G/DAB2IP	4
BP	GO:0001667	ameboidal-type cell migration	11/117	480/18800	0.000203927	0.00159508	0.000968254	AKT1/CTSH/GADD45A/PIK3R3/TNF/PIK3CA/DAB2IP/PIK3CD/RRAS/PTEN/HMGB1	11
BP	GO:1905953	negative regulation of lipid localization	4/117	47/18800	0.000206697	0.00161246	0.000978803	AKT1/TNF/NFKBIA/IRS2	4
BP	GO:0072175	epithelial tube formation	6/117	136/18800	0.000207944	0.00161789	0.000982101	PIK3CD/PRKACB/TSC2/PRKACA/TSC1/TRAF6	6
BP	GO:0014067	negative regulation of phosphatidylinositol 3-kinase signaling	3/117	19/18800	0.000211663	0.00162958	0.0009892	DAB2IP/PTEN/TSC2	3
BP	GO:0031645	negative regulation of neurological system process	3/117	19/18800	0.000211663	0.00162958	0.0009892	TNF/CTSC/PTEN	3
BP	GO:0097202	activation of cysteine-type endopeptidase activity	3/117	19/18800	0.000211663	0.00162958	0.0009892	CASP8/BAK1/BAD	3
BP	GO:2000269	regulation of fibroblast apoptotic process	3/117	19/18800	0.000211663	0.00162958	0.0009892	TP53/PIK3CA/BID	3
BP	GO:0008654	phospholipid biosynthetic process	8/117	258/18800	0.000212247	0.00162981	0.000989337	PIK3R3/PIK3CA/CAPN2/PIK3CD/PTEN/MTMR14/PIK3C3/MTMR4	8
BP	GO:0031641	regulation of myelination	4/117	48/18800	0.000224411	0.00171873	0.00104331	AKT1/TNF/CTSC/PTEN	4
BP	GO:0032386	regulation of intracellular transport	9/117	332/18800	0.000232681	0.00177744	0.00107895	MAPK1/MAPK8/HRAS/BBC3/STK11/SH3GLB1/PRKACA/ATG13/PRKAA1	9
BP	GO:0051384	response to glucocorticoid	6/117	139/18800	0.000234051	0.00178327	0.00108249	FOS/TNF/BAD/PIK3CA/RPS6KB1/IGF1R	6
BP	GO:0048167	regulation of synaptic plasticity	7/117	198/18800	0.000241327	0.00183396	0.00111326	MAPK1/HRAS/KRAS/ATF4/RAB8A/PTEN/SQSTM1	7
BP	GO:0001843	neural tube closure	5/117	90/18800	0.000247022	0.00185979	0.00112894	PRKACB/TSC2/PRKACA/TSC1/TRAF6	5
BP	GO:0031998	regulation of fatty acid beta-oxidation	3/117	20/18800	0.000247887	0.00185979	0.00112894	AKT1/IRS2/IRS1	3
BP	GO:0090201	negative regulation of release of cytochrome c from mitochondria	3/117	20/18800	0.000247887	0.00185979	0.00112894	AKT1/LMNA/BCL2L1	3
BP	GO:1903209	positive regulation of oxidative stress-induced cell death	3/117	20/18800	0.000247887	0.00185979	0.00112894	TNF/RIPK1/MCL1	3
BP	GO:1904263	positive regulation of TORC1 signaling	3/117	20/18800	0.000247887	0.00185979	0.00112894	RRAGA/RRAGB/RRAGD	3
BP	GO:0009410	response to xenobiotic stimulus	10/117	411/18800	0.000249153	0.00186453	0.00113182	FOS/TP53/TNF/BAK1/BAD/PARP4/RPS6KB1/ATG5/RPTOR/PRKAA1	10
BP	GO:0060606	tube closure	5/117	91/18800	0.000260097	0.00194149	0.00117853	PRKACB/TSC2/PRKACA/TSC1/TRAF6	5
BP	GO:1902041	regulation of extrinsic apoptotic signaling pathway via death domain receptors	4/117	50/18800	0.000263077	0.00195876	0.00118902	PMAIP1/BCL2L1/RAF1/PTEN	4
BP	GO:0010817	regulation of hormone levels	11/117	496/18800	0.000270177	0.00200654	0.00121802	CTSK/CTSL/TNF/BAD/CTSB/CTSZ/RAF1/RAB1A/IRS2/IRS1/IGF1R	11
BP	GO:1902115	regulation of organelle assembly	7/117	202/18800	0.000272582	0.00201586	0.00122368	TNF/ATG2A/SH3GLB1/ATG5/ULK1/WIPI1/PRKAA1	7
BP	GO:0071456	cellular response to hypoxia	6/117	143/18800	0.000272802	0.00201586	0.00122368	TP53/PMAIP1/BAD/LMNA/PTEN/PRKAA1	6
BP	GO:0001933	negative regulation of protein phosphorylation	9/117	341/18800	0.000283394	0.00208887	0.001268	AKT1/GADD45A/BAK1/GADD45B/DAB2IP/BAX/PTEN/TSC2/AKT1S1	9
BP	GO:0044088	regulation of vacuole organization	4/117	51/18800	0.000284104	0.00208887	0.001268	ATG2A/SH3GLB1/ULK1/WIPI1	4
BP	GO:0002902	regulation of B cell apoptotic process	3/117	21/18800	0.000287893	0.00211145	0.00128171	BAX/PTEN/IRS2	3
BP	GO:0062012	regulation of small molecule metabolic process	9/117	342/18800	0.000289555	0.00211836	0.0012859	AKT1/TP53/TNF/PMAIP1/BAD/STK11/IRS2/IRS1/PRKAA1	9
BP	GO:0007623	circadian rhythm	7/117	205/18800	0.000298096	0.00217544	0.00132055	TP53/TNF/MAPK8/ATF4/PTEN/PRKAA1/ATG7	7
BP	GO:1904035	regulation of epithelial cell apoptotic process	5/117	94/18800	0.000302493	0.00220156	0.0013364	EIF2S1/TNF/BAD/PRKAA1/IGF1R	5
BP	GO:0001894	tissue homeostasis	8/117	272/18800	0.000303172	0.00220156	0.0013364	CTSH/ACTB/CTSK/KRAS/BAX/STK11/TP53INP2/TRAF6	8
BP	GO:0032891	negative regulation of organic acid transport	3/117	22/18800	0.00033184	0.00239789	0.00145558	AKT1/TNF/IRS2	3
BP	GO:1903798	regulation of production of miRNAs involved in gene silencing by miRNA	3/117	22/18800	0.00033184	0.00239789	0.00145558	TP53/TNF/RIPK1	3
BP	GO:0014020	primary neural tube formation	5/117	96/18800	0.000333536	0.00239836	0.00145587	PRKACB/TSC2/PRKACA/TSC1/TRAF6	5
BP	GO:0032091	negative regulation of protein binding	5/117	96/18800	0.000333536	0.00239836	0.00145587	AKT1/ACTB/MAPK8/CTSZ/BAX	5
BP	GO:0017038	protein import	7/117	210/18800	0.000344862	0.00247375	0.00150163	AKT1/TP53/LMNA/NFKBIA/LAMP2/TSC2/SQSTM1	7
BP	GO:0050679	positive regulation of epithelial cell proliferation	7/117	211/18800	0.000354885	0.00253946	0.00154152	AKT1/TNF/BAD/HRAS/PIK3CD/HMGB1/RPTOR	7
BP	GO:0002718	regulation of cytokine production involved in immune response	5/117	98/18800	0.000366934	0.0026193	0.00158998	TNF/TRAF2/MAP3K7/ATG5/TRAF6	5
BP	GO:0006469	negative regulation of protein kinase activity	7/117	213/18800	0.000375632	0.0026749	0.00162373	AKT1/GADD45A/GADD45B/DAB2IP/PTEN/TSC2/AKT1S1	7
BP	GO:0003323	type B pancreatic cell development	3/117	23/18800	0.000379889	0.00267927	0.00162638	AKT1/BAD/RHEB	3
BP	GO:0010893	positive regulation of steroid biosynthetic process	3/117	23/18800	0.000379889	0.00267927	0.00162638	TNF/PRKAA1/IGF1R	3
BP	GO:0048169	regulation of long-term neuronal synaptic plasticity	3/117	23/18800	0.000379889	0.00267927	0.00162638	HRAS/KRAS/RAB8A	3
BP	GO:0070920	regulation of production of small RNA involved in gene silencing by RNA	3/117	23/18800	0.000379889	0.00267927	0.00162638	TP53/TNF/RIPK1	3
BP	GO:0045639	positive regulation of myeloid cell differentiation	5/117	99/18800	0.000384551	0.00270566	0.0016424	CASP8/FOS/TNF/RIPK1/TRAF6	5
BP	GO:0048872	homeostasis of number of cells	8/117	282/18800	0.000385885	0.00270856	0.00164417	AKT1/BAK1/PMAIP1/FAS/KRAS/PIK3CD/BAX/HMGB1	8
BP	GO:1902105	regulation of leukocyte differentiation	8/117	283/18800	0.000395078	0.00276649	0.00167933	CASP8/FOS/TNF/RIPK1/BAD/HMGB1/AMBRA1/TRAF6	8
BP	GO:0002367	cytokine production involved in immune response	5/117	100/18800	0.0004028	0.00281386	0.00170809	TNF/TRAF2/MAP3K7/ATG5/TRAF6	5
BP	GO:0038095	Fc-epsilon receptor signaling pathway	3/117	24/18800	0.000432195	0.00299079	0.00181549	MAPK8/MAP3K7/TRAF6	3
BP	GO:0045672	positive regulation of osteoclast differentiation	3/117	24/18800	0.000432195	0.00299079	0.00181549	FOS/TNF/TRAF6	3
BP	GO:1901522	positive regulation of transcription from RNA polymerase II promoter involved in cellular response to chemical stimulus	3/117	24/18800	0.000432195	0.00299079	0.00181549	TP53/RELA/ATF4	3
BP	GO:1904996	positive regulation of leukocyte adhesion to vascular endothelial cell	3/117	24/18800	0.000432195	0.00299079	0.00181549	TNF/RELA/TRAF6	3
BP	GO:0044262	cellular carbohydrate metabolic process	8/117	287/18800	0.000433655	0.00299341	0.00181708	AKT1/TP53/PMAIP1/BAD/STK11/PTEN/IRS2/IRS1	8
BP	GO:0008643	carbohydrate transport	6/117	156/18800	0.000434609	0.00299341	0.00181708	AKT1/TNF/RPS6KB1/TSC1/IRS2/IRS1	6
BP	GO:0070228	regulation of lymphocyte apoptotic process	4/117	57/18800	0.000436373	0.00299853	0.00182019	TP53/BAX/PTEN/IRS2	4
BP	GO:0032677	regulation of interleukin-8 production	5/117	102/18800	0.000441253	0.003025	0.00183626	TNF/RIPK1/RELA/RAB1A/HMGB1	5
BP	GO:0032103	positive regulation of response to external stimulus	10/117	442/18800	0.000442482	0.00302637	0.00183708	MAPK1/TNF/RIPK1/CTSC/TRADD/NFKBIA/MAP3K7/HMGB1/TRAF6/IGF1R	10
BP	GO:0031960	response to corticosteroid	6/117	157/18800	0.000449614	0.00306802	0.00186237	FOS/TNF/BAD/PIK3CA/RPS6KB1/IGF1R	6
BP	GO:0031349	positive regulation of defense response	8/117	289/18800	0.000454061	0.00309119	0.00187643	TNF/RIPK1/CTSC/TRADD/NFKBIA/MAP3K7/HMGB1/TRAF6	8
BP	GO:0032637	interleukin-8 production	5/117	103/18800	0.000461487	0.00312727	0.00189833	TNF/RIPK1/RELA/RAB1A/HMGB1	5
BP	GO:1903076	regulation of protein localization to plasma membrane	5/117	103/18800	0.000461487	0.00312727	0.00189833	AKT1/ACTB/TNF/BCL2L1/SQSTM1	5
BP	GO:0051607	defense response to virus	8/117	290/18800	0.000464553	0.00314081	0.00190655	PRF1/PMAIP1/RELA/BCL2L1/MAP3K14/ATG12/ATG5/ATG7	8
BP	GO:0045785	positive regulation of cell adhesion	10/117	446/18800	0.000474706	0.00319106	0.00193706	AKT1/TNF/BAD/RELA/PIK3CA/RRAS/TSC1/HMGB1/AMBRA1/TRAF6	10
BP	GO:0022409	positive regulation of cell-cell adhesion	8/117	291/18800	0.000475241	0.00319106	0.00193706	AKT1/TNF/BAD/RELA/PIK3CA/HMGB1/AMBRA1/TRAF6	8
BP	GO:0140546	NA	8/117	291/18800	0.000475241	0.00319106	0.00193706	PRF1/PMAIP1/RELA/BCL2L1/MAP3K14/ATG12/ATG5/ATG7	8
BP	GO:0006606	protein import into nucleus	6/117	159/18800	0.000480837	0.00322128	0.0019554	AKT1/TP53/LMNA/NFKBIA/TSC2/SQSTM1	6
BP	GO:0001841	neural tube formation	5/117	104/18800	0.000482412	0.00322449	0.00195735	PRKACB/TSC2/PRKACA/TSC1/TRAF6	5
BP	GO:0032469	endoplasmic reticulum calcium ion homeostasis	3/117	25/18800	0.000488909	0.00325312	0.00197473	ITPR1/BAK1/BAX	3
BP	GO:0070423	nucleotide-binding oligomerization domain containing signaling pathway	3/117	25/18800	0.000488909	0.00325312	0.00197473	RELA/NFKBIA/MAP3K7	3
BP	GO:2000045	regulation of G1/S transition of mitotic cell cycle	6/117	160/18800	0.000497068	0.0032987	0.00200239	AKT1/TP53/BID/PTEN/AMBRA1/RPTOR	6
BP	GO:1902893	regulation of pri-miRNA transcription by RNA polymerase II	4/117	59/18800	0.000498001	0.0032987	0.00200239	FOS/TP53/TNF/RELA	4
BP	GO:0045833	negative regulation of lipid metabolic process	5/117	105/18800	0.000504043	0.00333122	0.00202214	AKT1/TNF/DAB2IP/RUBCN/PRKAA1	5
BP	GO:0033157	regulation of intracellular protein transport	7/117	224/18800	0.000507794	0.00334848	0.00203261	MAPK8/HRAS/BBC3/SH3GLB1/PRKACA/ATG13/PRKAA1	7
BP	GO:0002460	adaptive immune response based on somatic recombination of immune receptors built from immunoglobulin superfamily domains	9/117	370/18800	0.000512945	0.00337488	0.00204864	CTSH/TNF/PRF1/CTSC/HRAS/TRAF2/MAP3K7/HMGB1/TRAF6	9
BP	GO:0000082	G1/S transition of mitotic cell cycle	7/117	225/18800	0.000521441	0.00341805	0.00207484	AKT1/TP53/BID/RPS6KB1/PTEN/AMBRA1/RPTOR	7
BP	GO:0051346	negative regulation of hydrolase activity	9/117	371/18800	0.000522993	0.00341805	0.00207484	AKT1/BIRC5/TNF/HRAS/CTSB/DAB2IP/RAF1/IGBP1/TSC1	9
BP	GO:1903706	regulation of hemopoiesis	9/117	371/18800	0.000522993	0.00341805	0.00207484	CASP8/FOS/TNF/RIPK1/BAD/NFKBIA/HMGB1/AMBRA1/TRAF6	9
BP	GO:0002753	cytoplasmic pattern recognition receptor signaling pathway	4/117	60/18800	0.00053103	0.00345522	0.00209741	RELA/NFKBIA/MAP3K7/TRAF6	4
BP	GO:0061614	pri-miRNA transcription by RNA polymerase II	4/117	60/18800	0.00053103	0.00345522	0.00209741	FOS/TP53/TNF/RELA	4
BP	GO:0048511	rhythmic process	8/117	297/18800	0.000543647	0.00352523	0.00213991	TP53/TNF/MAPK8/ATF4/PTEN/PRKAA1/IGF1R/ATG7	8
BP	GO:0051170	import into nucleus	6/117	163/18800	0.000548337	0.00352523	0.00213991	AKT1/TP53/LMNA/NFKBIA/TSC2/SQSTM1	6
BP	GO:0033138	positive regulation of peptidyl-serine phosphorylation	5/117	107/18800	0.000549488	0.00352523	0.00213991	AKT1/TNF/PIK3CA/RAF1/RPTOR	5
BP	GO:0002726	positive regulation of T cell cytokine production	3/117	26/18800	0.00055018	0.00352523	0.00213991	TRAF2/MAP3K7/TRAF6	3
BP	GO:0035872	nucleotide-binding domain, leucine rich repeat containing receptor signaling pathway	3/117	26/18800	0.00055018	0.00352523	0.00213991	RELA/NFKBIA/MAP3K7	3
BP	GO:0050995	negative regulation of lipid catabolic process	3/117	26/18800	0.00055018	0.00352523	0.00213991	AKT1/TNF/PRKAA1	3
BP	GO:0051204	protein insertion into mitochondrial membrane	3/117	26/18800	0.00055018	0.00352523	0.00213991	MAPK8/BBC3/BAX	3
BP	GO:0051100	negative regulation of binding	6/117	165/18800	0.000584738	0.00373851	0.00226937	AKT1/ACTB/MAPK8/CTSZ/BAX/NFKBIA	6
BP	GO:0010594	regulation of endothelial cell migration	7/117	230/18800	0.00059413	0.00379032	0.00230082	AKT1/GADD45A/TNF/DAB2IP/PIK3CD/RRAS/HMGB1	7
BP	GO:0009408	response to heat	5/117	109/18800	0.000597945	0.0038064	0.00231058	AKT1/EIF2S1/DAXX/RPS6KB1/PRKACA	5
BP	GO:0009651	response to salt stress	3/117	27/18800	0.000616155	0.00390541	0.00237069	TP53/TNF/BAX	3
BP	GO:2000108	positive regulation of leukocyte apoptotic process	3/117	27/18800	0.000616155	0.00390541	0.00237069	TP53/PIK3CD/BAX	3
BP	GO:1901222	regulation of NIK/NF-kappaB signaling	5/117	110/18800	0.000623342	0.00394247	0.00239318	TNF/RELA/TRADD/NFKBIA/TRAF6	5
BP	GO:0033002	muscle cell proliferation	7/117	233/18800	0.00064147	0.00404842	0.0024575	AKT1/TNF/PIK3CA/ERN1/RPS6KB1/PTEN/IGF1R	7
BP	GO:0014066	regulation of phosphatidylinositol 3-kinase signaling	5/117	111/18800	0.00064954	0.00409057	0.00248308	TNF/DAB2IP/PTEN/TSC2/IGF1R	5
BP	GO:0021543	pallium development	6/117	169/18800	0.000663156	0.0041674	0.00252972	BAD/DAB2IP/BAX/PTEN/TSC1/IGF1R	6
BP	GO:0010633	negative regulation of epithelial cell migration	5/117	112/18800	0.000676554	0.00424253	0.00257532	GADD45A/TNF/DAB2IP/PTEN/HMGB1	5
BP	GO:0006913	nucleocytoplasmic transport	8/117	308/18800	0.000689708	0.00430665	0.00261425	AKT1/TP53/LMNA/NFKBIA/TSC2/PRKACA/SQSTM1/TSC1	8
BP	GO:0051169	nuclear transport	8/117	308/18800	0.000689708	0.00430665	0.00261425	AKT1/TP53/LMNA/NFKBIA/TSC2/PRKACA/SQSTM1/TSC1	8
BP	GO:0006650	glycerophospholipid metabolic process	8/117	309/18800	0.000704419	0.0043854	0.00266205	PIK3R3/PIK3CA/CAPN2/PIK3CD/PTEN/MTMR14/PIK3C3/MTMR4	8
BP	GO:0060402	calcium ion transport into cytosol	6/117	171/18800	0.000705302	0.0043854	0.00266205	ITPR2/ITPR1/BAK1/BAX/PRKACA/ATG5	6
BP	GO:0014823	response to activity	4/117	65/18800	0.000719895	0.00446669	0.0027114	TNF/PIK3CA/STK11/PRKAA1	4
BP	GO:0051052	regulation of DNA metabolic process	10/117	472/18800	0.0007353	0.00455267	0.00276359	AKT1/MAPK1/ACTB/TP53/TNF/PIK3CA/PARP4/BAX/HMGB1/IGF1R	10
BP	GO:1900076	regulation of cellular response to insulin stimulus	4/117	66/18800	0.000762691	0.00469316	0.00284887	RPS6KB1/TSC2/IRS1/PRKAA1	4
BP	GO:0002068	glandular epithelial cell development	3/117	29/18800	0.000762779	0.00469316	0.00284887	AKT1/BAD/RHEB	3
BP	GO:0003309	type B pancreatic cell differentiation	3/117	29/18800	0.000762779	0.00469316	0.00284887	AKT1/BAD/RHEB	3
BP	GO:1901224	positive regulation of NIK/NF-kappaB signaling	4/117	67/18800	0.000807255	0.00495644	0.00300869	TNF/RELA/TRADD/TRAF6	4
BP	GO:0002761	regulation of myeloid leukocyte differentiation	5/117	117/18800	0.00082444	0.00505141	0.00306634	CASP8/FOS/TNF/RIPK1/TRAF6	5
BP	GO:0045948	positive regulation of translational initiation	3/117	30/18800	0.000843704	0.00511615	0.00310563	TNF/RPS6KB1/RPS6KB2	3
BP	GO:0048147	negative regulation of fibroblast proliferation	3/117	30/18800	0.000843704	0.00511615	0.00310563	TP53/DAB2IP/BAX	3
BP	GO:0070498	interleukin-1-mediated signaling pathway	3/117	30/18800	0.000843704	0.00511615	0.00310563	RELA/MAP3K7/TRAF6	3
BP	GO:0071480	cellular response to gamma radiation	3/117	30/18800	0.000843704	0.00511615	0.00310563	TP53/HRAS/BCL2L1	3
BP	GO:0090151	establishment of protein localization to mitochondrial membrane	3/117	30/18800	0.000843704	0.00511615	0.00310563	MAPK8/BBC3/BAX	3
BP	GO:0046626	regulation of insulin receptor signaling pathway	4/117	68/18800	0.000853626	0.00515506	0.00312925	RPS6KB1/TSC2/IRS1/PRKAA1	4
BP	GO:0046854	phosphatidylinositol phosphorylation	4/117	68/18800	0.000853626	0.00515506	0.00312925	PIK3R3/PIK3CA/PIK3CD/PIK3C3	4
BP	GO:1903320	regulation of protein modification by small protein conjugation or removal	7/117	246/18800	0.00088238	0.00530691	0.00322143	AKT1/DAXX/RELA/PTEN/SQSTM1/ATG5/TRAF6	7
BP	GO:2001020	regulation of response to DNA damage stimulus	7/117	246/18800	0.00088238	0.00530691	0.00322143	ACTB/TP53/PMAIP1/MCL1/BID/BCL2L1/HMGB1	7
BP	GO:0008361	regulation of cell size	6/117	179/18800	0.000895019	0.00537194	0.00326091	PTEN/TSC1/ULK1/AKT1S1/RPTOR/ULK2	6
BP	GO:0006413	translational initiation	5/117	120/18800	0.000924019	0.0055347	0.00335971	EIF2S1/TNF/ATF4/RPS6KB1/RPS6KB2	5
BP	GO:0005979	regulation of glycogen biosynthetic process	3/117	31/18800	0.000929882	0.005536	0.00336049	AKT1/IRS2/IRS1	3
BP	GO:0010962	regulation of glucan biosynthetic process	3/117	31/18800	0.000929882	0.005536	0.00336049	AKT1/IRS2/IRS1	3
BP	GO:0062098	NA	3/117	31/18800	0.000929882	0.005536	0.00336049	CASP8/TP53/RIPK1	3
BP	GO:0090066	regulation of anatomical structure size	10/117	487/18800	0.000933042	0.00554359	0.0033651	TNF/PIK3CA/SPTAN1/PTEN/ATG5/TSC1/ULK1/AKT1S1/RPTOR/ULK2	10
BP	GO:0051209	release of sequestered calcium ion into cytosol	5/117	121/18800	0.00095912	0.00568704	0.00345218	ITPR2/ITPR1/BAX/PRKACA/ATG5	5
BP	GO:0051283	negative regulation of sequestering of calcium ion	5/117	122/18800	0.000995204	0.00588912	0.00357485	ITPR2/ITPR1/BAX/PRKACA/ATG5	5
BP	GO:0033028	myeloid cell apoptotic process	3/117	32/18800	0.00102144	0.0059842	0.00363256	CTSL/PIK3CD/PTEN	3
BP	GO:0035883	enteroendocrine cell differentiation	3/117	32/18800	0.00102144	0.0059842	0.00363256	AKT1/BAD/RHEB	3
BP	GO:0046320	regulation of fatty acid oxidation	3/117	32/18800	0.00102144	0.0059842	0.00363256	AKT1/IRS2/IRS1	3
BP	GO:1900745	positive regulation of p38MAPK cascade	3/117	32/18800	0.00102144	0.0059842	0.00363256	GADD45A/GADD45B/GADD45G	3
BP	GO:1903955	positive regulation of protein targeting to mitochondrion	3/117	32/18800	0.00102144	0.0059842	0.00363256	SH3GLB1/ATG13/PRKAA1	3
BP	GO:0001838	embryonic epithelial tube formation	5/117	124/18800	0.00107039	0.00624604	0.00379151	PRKACB/TSC2/PRKACA/TSC1/TRAF6	5
BP	GO:0051282	regulation of sequestering of calcium ion	5/117	124/18800	0.00107039	0.00624604	0.00379151	ITPR2/ITPR1/BAX/PRKACA/ATG5	5
BP	GO:0044843	cell cycle G1/S phase transition	7/117	255/18800	0.00108737	0.00633261	0.00384406	AKT1/TP53/BID/RPS6KB1/PTEN/AMBRA1/RPTOR	7
BP	GO:0051235	maintenance of location	8/117	331/18800	0.00109773	0.00638028	0.00387299	AKT1/ITPR2/TNF/ITPR1/BAX/NFKBIA/PRKACA/ATG5	8
BP	GO:0033555	multicellular organismal response to stress	4/117	73/18800	0.001114	0.00646206	0.00392264	AKT1/CAPN2/RPS6KB1/PTEN	4
BP	GO:0010661	positive regulation of muscle cell apoptotic process	3/117	33/18800	0.00111852	0.00646279	0.00392308	TP53/ATF4/CAPN2	3
BP	GO:0045940	positive regulation of steroid metabolic process	3/117	33/18800	0.00111852	0.00646279	0.00392308	TNF/PRKAA1/IGF1R	3
BP	GO:1902806	regulation of cell cycle G1/S phase transition	6/117	188/18800	0.00115306	0.0066493	0.0040363	AKT1/TP53/BID/PTEN/AMBRA1/RPTOR	6
BP	GO:0070371	ERK1 and ERK2 cascade	8/117	335/18800	0.00118517	0.00682109	0.00414058	CTSH/MAPK1/TNF/HRAS/DAB2IP/RRAS/PTEN/HMGB1	8
BP	GO:0042113	B cell activation	8/117	336/18800	0.00120787	0.0069382	0.00421167	CASP8/TP53/BAK1/BAD/PIK3CD/BAX/IGBP1/IRS2	8
BP	GO:0016032	viral process	9/117	418/18800	0.00121421	0.00696099	0.0042255	CTSL/TP53/TNF/CTSB/BCL2L1/RAB1A/ATG12/ATG5/ATG7	9
BP	GO:0060401	cytosolic calcium ion transport	6/117	190/18800	0.00121744	0.00696592	0.0042285	ITPR2/ITPR1/BAK1/BAX/PRKACA/ATG5	6
BP	GO:0032743	positive regulation of interleukin-2 production	3/117	34/18800	0.00122123	0.00697403	0.00423342	TRAF2/MAP3K7/TRAF6	3
BP	GO:0071479	cellular response to ionizing radiation	4/117	75/18800	0.0012322	0.00700217	0.0042505	GADD45A/TP53/HRAS/BCL2L1	4
BP	GO:0140056	organelle localization by membrane tethering	4/117	75/18800	0.0012322	0.00700217	0.0042505	RAB8A/SNAP29/STX17/VMP1	4
BP	GO:0051208	sequestering of calcium ion	5/117	128/18800	0.0012333	0.00700217	0.0042505	ITPR2/ITPR1/BAX/PRKACA/ATG5	5
BP	GO:0002696	positive regulation of leukocyte activation	9/117	421/18800	0.00127586	0.00722989	0.00438873	AKT1/TNF/BAD/CTSC/PIK3CA/IRS2/HMGB1/AMBRA1/TRAF6	9
BP	GO:0051054	positive regulation of DNA metabolic process	7/117	263/18800	0.00129946	0.00734947	0.00446132	AKT1/MAPK1/ACTB/TNF/BAX/HMGB1/IGF1R	7
BP	GO:0035303	regulation of dephosphorylation	5/117	130/18800	0.0013213	0.00745865	0.00452759	TNF/IGBP1/TSC1/AMBRA1/MTMR4	5
BP	GO:0034260	negative regulation of GTPase activity	3/117	35/18800	0.00132969	0.00749161	0.0045476	HRAS/DAB2IP/TSC1	3
BP	GO:0001935	endothelial cell proliferation	6/117	194/18800	0.00135443	0.00761641	0.00462336	AKT1/TNF/PIK3CD/ERN1/HMGB1/RPTOR	6
BP	GO:0042391	regulation of membrane potential	9/117	425/18800	0.00136198	0.00764426	0.00464026	AKT1/TNF/BAK1/PMAIP1/BAD/BID/BCL2L1/BAX/PTEN	9
BP	GO:1903037	regulation of leukocyte cell-cell adhesion	8/117	344/18800	0.00140231	0.00785562	0.00476857	AKT1/TNF/BAD/RELA/PIK3CA/HMGB1/AMBRA1/TRAF6	8
BP	GO:1903533	regulation of protein targeting	4/117	78/18800	0.00142557	0.00796468	0.00483477	HRAS/SH3GLB1/ATG13/PRKAA1	4
BP	GO:0043393	regulation of protein binding	6/117	196/18800	0.0014272	0.00796468	0.00483477	AKT1/ACTB/MAPK8/CTSZ/BAX/PRKACA	6
BP	GO:1903146	regulation of autophagy of mitochondrion	3/117	36/18800	0.00144403	0.00804336	0.00488253	TP53/TSC2/AMBRA1	3
BP	GO:0050804	modulation of chemical synaptic transmission	9/117	429/18800	0.00145274	0.00807656	0.00490268	MAPK1/TNF/HRAS/KRAS/ATF4/RAB8A/PTEN/PRKACA/SQSTM1	9
BP	GO:0099177	regulation of trans-synaptic signaling	9/117	430/18800	0.00147617	0.00819136	0.00497237	MAPK1/TNF/HRAS/KRAS/ATF4/RAB8A/PTEN/PRKACA/SQSTM1	9
BP	GO:0007265	Ras protein signal transduction	8/117	347/18800	0.00148134	0.00820457	0.00498039	TP53/HRAS/KRAS/DAB2IP/RAF1/RRAS/MRAS/SQSTM1	8
BP	GO:0006970	response to osmotic stress	4/117	79/18800	0.00149446	0.00824618	0.00500564	TP53/TNF/BAD/BAX	4
BP	GO:0072332	intrinsic apoptotic signaling pathway by p53 class mediator	4/117	79/18800	0.00149446	0.00824618	0.00500564	TP53/PMAIP1/BAX/STK11	4
BP	GO:0048608	reproductive structure development	9/117	433/18800	0.00154831	0.0085273	0.00517629	AKT1/MAPK1/CASP8/BAK1/CTSB/BCL2L1/BAX/STK11/PTEN	9
BP	GO:0030879	mammary gland development	5/117	135/18800	0.00156156	0.00855164	0.00519107	CAPN1/AKT1/MAPK1/BAX/IRS2	5
BP	GO:0045861	negative regulation of proteolysis	8/117	350/18800	0.00156388	0.00855164	0.00519107	AKT1/TP53/BIRC5/TNF/CTSB/CTSZ/RAF1/IGBP1	8
BP	GO:0046326	positive regulation of glucose import	3/117	37/18800	0.00156436	0.00855164	0.00519107	AKT1/IRS2/IRS1	3
BP	GO:0070873	regulation of glycogen metabolic process	3/117	37/18800	0.00156436	0.00855164	0.00519107	AKT1/IRS2/IRS1	3
BP	GO:0032535	regulation of cellular component size	8/117	351/18800	0.00159218	0.00868759	0.00527359	PIK3CA/SPTAN1/PTEN/TSC1/ULK1/AKT1S1/RPTOR/ULK2	8
BP	GO:0050867	positive regulation of cell activation	9/117	436/18800	0.00162326	0.00882441	0.00535664	AKT1/TNF/BAD/CTSC/PIK3CA/IRS2/HMGB1/AMBRA1/TRAF6	9
BP	GO:0061458	reproductive system development	9/117	436/18800	0.00162326	0.00882441	0.00535664	AKT1/MAPK1/CASP8/BAK1/CTSB/BCL2L1/BAX/STK11/PTEN	9
BP	GO:0010660	regulation of muscle cell apoptotic process	4/117	81/18800	0.00163916	0.00887802	0.00538919	TP53/ATF4/CAPN2/IGF1R	4
BP	GO:0031016	pancreas development	4/117	81/18800	0.00163916	0.00887802	0.00538919	AKT1/BAK1/BAD/RHEB	4
BP	GO:0015911	plasma membrane long-chain fatty acid transport	2/117	10/18800	0.00167259	0.00891137	0.00540943	AKT1/IRS2	2
BP	GO:0032070	regulation of deoxyribonuclease activity	2/117	10/18800	0.00167259	0.00891137	0.00540943	AKT1/HMGB1	2
BP	GO:0048102	autophagic cell death	2/117	10/18800	0.00167259	0.00891137	0.00540943	SH3GLB1/ATG7	2
BP	GO:0048563	post-embryonic animal organ morphogenesis	2/117	10/18800	0.00167259	0.00891137	0.00540943	BAK1/BAX	2
BP	GO:0055015	ventricular cardiac muscle cell development	2/117	10/18800	0.00167259	0.00891137	0.00540943	LMNA/ATG5	2
BP	GO:0060068	vagina development	2/117	10/18800	0.00167259	0.00891137	0.00540943	BAK1/BAX	2
BP	GO:0071233	cellular response to leucine	2/117	10/18800	0.00167259	0.00891137	0.00540943	RRAGD/RPTOR	2
BP	GO:0090219	negative regulation of lipid kinase activity	2/117	10/18800	0.00167259	0.00891137	0.00540943	DAB2IP/RUBCN	2
BP	GO:2001269	positive regulation of cysteine-type endopeptidase activity involved in apoptotic signaling pathway	2/117	10/18800	0.00167259	0.00891137	0.00540943	FAS/BAX	2
BP	GO:0002369	T cell cytokine production	3/117	38/18800	0.00169079	0.00897585	0.00544858	TRAF2/MAP3K7/TRAF6	3
BP	GO:0002724	regulation of T cell cytokine production	3/117	38/18800	0.00169079	0.00897585	0.00544858	TRAF2/MAP3K7/TRAF6	3
BP	GO:0043242	negative regulation of protein complex disassembly	4/117	82/18800	0.00171504	0.00908815	0.00551674	TNF/PIK3CA/SPTAN1/RUBCN	4
BP	GO:0042552	myelination	5/117	138/18800	0.00172032	0.00909973	0.00552377	AKT1/TNF/CTSC/PTEN/TSC1	5
BP	GO:0051960	regulation of nervous system development	9/117	440/18800	0.00172771	0.00912241	0.00553754	AKT1/TP53/TNF/CTSC/RHEB/STK11/PTEN/ULK1/ULK2	9
BP	GO:0032570	response to progesterone	3/117	39/18800	0.00182344	0.00955581	0.00580062	FOS/BAD/IGF1R	3
BP	GO:0032885	regulation of polysaccharide biosynthetic process	3/117	39/18800	0.00182344	0.00955581	0.00580062	AKT1/IRS2/IRS1	3
BP	GO:0043687	post-translational protein modification	3/117	39/18800	0.00182344	0.00955581	0.00580062	ATG12/ATG5/ATG7	3
BP	GO:1904994	regulation of leukocyte adhesion to vascular endothelial cell	3/117	39/18800	0.00182344	0.00955581	0.00580062	TNF/RELA/TRAF6	3
BP	GO:0007272	ensheathment of neurons	5/117	140/18800	0.00183253	0.00955581	0.00580062	AKT1/TNF/CTSC/PTEN/TSC1	5
BP	GO:0008366	axon ensheathment	5/117	140/18800	0.00183253	0.00955581	0.00580062	AKT1/TNF/CTSC/PTEN/TSC1	5
BP	GO:0050768	negative regulation of neurogenesis	5/117	140/18800	0.00183253	0.00955581	0.00580062	TP53/TNF/PTEN/ULK1/ULK2	5
BP	GO:0022406	membrane docking	4/117	84/18800	0.00187405	0.00975501	0.00592154	RAB8A/SNAP29/STX17/VMP1	4
BP	GO:0048284	organelle fusion	5/117	141/18800	0.00189061	0.00980649	0.00595279	BAK1/BAX/RAB8A/SNAP29/STX17	5
BP	GO:0070555	response to interleukin-1	5/117	141/18800	0.00189061	0.00980649	0.00595279	RELA/DAB2IP/MAP3K7/IGBP1/TRAF6	5
BP	GO:0010876	lipid localization	9/117	446/18800	0.00189443	0.00980903	0.00595434	AKT1/TNF/NFKBIA/RPS6KB1/ATG2A/IRS2/VMP1/PRKAA1/ATG2B	9
BP	GO:0045637	regulation of myeloid cell differentiation	6/117	208/18800	0.00192844	0.00996753	0.00605055	CASP8/FOS/TNF/RIPK1/NFKBIA/TRAF6	6
BP	GO:0010657	muscle cell apoptotic process	4/117	85/18800	0.00195726	0.0100988	0.00613023	TP53/ATF4/CAPN2/IGF1R	4
BP	GO:0097009	energy homeostasis	3/117	40/18800	0.00196241	0.0101076	0.00613557	PIK3CA/SQSTM1/PRKAA1	3
BP	GO:0002573	myeloid leukocyte differentiation	6/117	210/18800	0.00202349	0.0102706	0.00623454	CASP8/FOS/TNF/RIPK1/PIK3CD/TRAF6	6
BP	GO:0002449	lymphocyte mediated immunity	8/117	365/18800	0.00203296	0.0102706	0.00623454	CTSH/TNF/PRF1/CTSC/TRAF2/MAP3K7/HMGB1/TRAF6	8
BP	GO:0010917	negative regulation of mitochondrial membrane potential	2/117	11/18800	0.00203597	0.0102706	0.00623454	PMAIP1/BAX	2
BP	GO:0032000	positive regulation of fatty acid beta-oxidation	2/117	11/18800	0.00203597	0.0102706	0.00623454	IRS2/IRS1	2
BP	GO:0045837	negative regulation of membrane potential	2/117	11/18800	0.00203597	0.0102706	0.00623454	PMAIP1/BAX	2
BP	GO:0097396	response to interleukin-17	2/117	11/18800	0.00203597	0.0102706	0.00623454	TRAF2/TRAF6	2
BP	GO:0097398	cellular response to interleukin-17	2/117	11/18800	0.00203597	0.0102706	0.00623454	TRAF2/TRAF6	2
BP	GO:0097400	interleukin-17-mediated signaling pathway	2/117	11/18800	0.00203597	0.0102706	0.00623454	TRAF2/TRAF6	2
BP	GO:1901030	positive regulation of mitochondrial outer membrane permeabilization involved in apoptotic signaling pathway	2/117	11/18800	0.00203597	0.0102706	0.00623454	MAPK8/BBC3	2
BP	GO:1903059	regulation of protein lipidation	2/117	11/18800	0.00203597	0.0102706	0.00623454	ATG13/ULK1	2
BP	GO:1903799	negative regulation of production of miRNAs involved in gene silencing by miRNA	2/117	11/18800	0.00203597	0.0102706	0.00623454	TP53/TNF	2
BP	GO:1990440	positive regulation of transcription from RNA polymerase II promoter in response to endoplasmic reticulum stress	2/117	11/18800	0.00203597	0.0102706	0.00623454	TP53/ATF4	2
BP	GO:0033574	response to testosterone	3/117	41/18800	0.0021078	0.0105966	0.00643243	BAD/RPS6KB1/IGF1R	3
BP	GO:0071548	response to dexamethasone	3/117	41/18800	0.0021078	0.0105966	0.00643243	PIK3CA/RPS6KB1/IGF1R	3
BP	GO:0043524	negative regulation of neuron apoptotic process	5/117	145/18800	0.00213647	0.010686	0.00648666	HRAS/PIK3CA/KRAS/BCL2L1/BAX	5
BP	GO:0050729	positive regulation of inflammatory response	5/117	145/18800	0.00213647	0.010686	0.00648666	TNF/RIPK1/CTSC/TRADD/NFKBIA	5
BP	GO:0051961	negative regulation of nervous system development	5/117	145/18800	0.00213647	0.010686	0.00648666	TP53/TNF/PTEN/ULK1/ULK2	5
BP	GO:0031396	regulation of protein ubiquitination	6/117	213/18800	0.00217267	0.0108302	0.00657422	AKT1/DAXX/PTEN/SQSTM1/ATG5/TRAF6	6
BP	GO:0034764	positive regulation of transmembrane transport	6/117	213/18800	0.00217267	0.0108302	0.00657422	AKT1/CTSS/BAX/IRS2/IRS1/VMP1	6
BP	GO:0106106	cold-induced thermogenesis	5/117	146/18800	0.00220141	0.0109364	0.00663868	ATF4/GADD45G/RHEB/STK11/IGF1R	5
BP	GO:0120161	regulation of cold-induced thermogenesis	5/117	146/18800	0.00220141	0.0109364	0.00663868	ATF4/GADD45G/RHEB/STK11/IGF1R	5
BP	GO:0002709	regulation of T cell mediated immunity	4/117	88/18800	0.0022222	0.0110211	0.00669007	TRAF2/MAP3K7/HMGB1/TRAF6	4
BP	GO:0002443	leukocyte mediated immunity	9/117	457/18800	0.00223347	0.0110583	0.00671269	CTSH/TNF/PRF1/CTSC/TRAF2/PIK3CD/MAP3K7/HMGB1/TRAF6	9
BP	GO:0032735	positive regulation of interleukin-12 production	3/117	42/18800	0.00225972	0.0111507	0.00676877	RELA/HMGB1/TRAF6	3
BP	GO:0060964	regulation of gene silencing by miRNA	3/117	42/18800	0.00225972	0.0111507	0.00676877	TP53/TNF/RIPK1	3
BP	GO:2000377	regulation of reactive oxygen species metabolic process	5/117	147/18800	0.00226778	0.0111718	0.00678156	GADD45A/TP53/TNF/RIPK1/ATG5	5
BP	GO:0006470	protein dephosphorylation	7/117	291/18800	0.00230717	0.0113279	0.0068763	TNF/STK11/PTEN/MTMR14/TSC1/AMBRA1/MTMR4	7
BP	GO:0042063	gliogenesis	7/117	291/18800	0.00230717	0.0113279	0.0068763	AKT1/MAPK1/TNF/KRAS/DAB2IP/RHEB/PTEN	7
BP	GO:0044070	regulation of anion transport	4/117	89/18800	0.00231574	0.011351	0.00689035	TNF/RIPK1/ATF4/PRKAA1	4
BP	GO:0030258	lipid modification	6/117	216/18800	0.00233002	0.011402	0.0069213	AKT1/PTEN/IRS2/IRS1/MTMR4/PRKAA1	6
BP	GO:0070301	cellular response to hydrogen peroxide	4/117	90/18800	0.00241196	0.0117314	0.00712126	RIPK1/RELA/ERN1/PRKAA1	4
BP	GO:0006983	ER overload response	2/117	12/18800	0.00243324	0.0117314	0.00712126	TP53/ATG10	2
BP	GO:0032782	bile acid secretion	2/117	12/18800	0.00243324	0.0117314	0.00712126	TNF/PRKAA1	2
BP	GO:0036295	cellular response to increased oxygen levels	2/117	12/18800	0.00243324	0.0117314	0.00712126	FAS/ATG7	2
BP	GO:0051798	positive regulation of hair follicle development	2/117	12/18800	0.00243324	0.0117314	0.00712126	TNF/TRADD	2
BP	GO:0060831	smoothened signaling pathway involved in dorsal/ventral neural tube patterning	2/117	12/18800	0.00243324	0.0117314	0.00712126	PRKACB/PRKACA	2
BP	GO:0070417	cellular response to cold	2/117	12/18800	0.00243324	0.0117314	0.00712126	NFKBIA/PRKACA	2
BP	GO:1903800	positive regulation of production of miRNAs involved in gene silencing by miRNA	2/117	12/18800	0.00243324	0.0117314	0.00712126	TP53/RIPK1	2
BP	GO:2000628	regulation of miRNA metabolic process	2/117	12/18800	0.00243324	0.0117314	0.00712126	RELA/HRAS	2
BP	GO:0010001	glial cell differentiation	6/117	218/18800	0.00243959	0.0117417	0.00712751	AKT1/MAPK1/TNF/KRAS/RHEB/PTEN	6
BP	GO:0034504	protein localization to nucleus	7/117	294/18800	0.00244336	0.0117417	0.00712751	AKT1/TP53/LMNA/NFKBIA/STK11/TSC2/SQSTM1	7
BP	GO:0051051	negative regulation of transport	9/117	464/18800	0.00247331	0.0118582	0.00719821	AKT1/TNF/ATF4/RUBCN/PTEN/ATG5/IRS2/HMGB1/IRS1	9
BP	GO:0016331	morphogenesis of embryonic epithelium	5/117	150/18800	0.00247566	0.0118582	0.00719821	PRKACB/TSC2/PRKACA/TSC1/TRAF6	5
BP	GO:0051651	maintenance of location in cell	6/117	219/18800	0.00249581	0.0119353	0.00724502	AKT1/ITPR2/ITPR1/BAX/PRKACA/ATG5	6
BP	GO:0032465	regulation of cytokinesis	4/117	91/18800	0.0025109	0.0119491	0.00725342	BCL2L1/PIK3C3/SH3GLB1/IGF1R	4
BP	GO:0090398	cellular senescence	4/117	91/18800	0.0025109	0.0119491	0.00725342	TP53/MAPK8/HRAS/IGF1R	4
BP	GO:0097306	cellular response to alcohol	4/117	91/18800	0.0025109	0.0119491	0.00725342	AKT1/ITPR2/PRKAA1/IGF1R	4
BP	GO:0030072	peptide hormone secretion	6/117	220/18800	0.002553	0.0121299	0.00736314	TNF/BAD/RAF1/RAB1A/IRS2/IRS1	6
BP	GO:0002066	columnar/cuboidal epithelial cell development	3/117	44/18800	0.00258353	0.0121765	0.00739148	AKT1/BAD/RHEB	3
BP	GO:0010828	positive regulation of glucose transmembrane transport	3/117	44/18800	0.00258353	0.0121765	0.00739148	AKT1/IRS2/IRS1	3
BP	GO:0060147	regulation of posttranscriptional gene silencing	3/117	44/18800	0.00258353	0.0121765	0.00739148	TP53/TNF/RIPK1	3
BP	GO:1900368	regulation of RNA interference	3/117	44/18800	0.00258353	0.0121765	0.00739148	TP53/TNF/RIPK1	3
BP	GO:1903214	regulation of protein targeting to mitochondrion	3/117	44/18800	0.00258353	0.0121765	0.00739148	SH3GLB1/ATG13/PRKAA1	3
BP	GO:0007159	leukocyte cell-cell adhesion	8/117	381/18800	0.00264904	0.0124653	0.00756677	AKT1/TNF/BAD/RELA/PIK3CA/HMGB1/AMBRA1/TRAF6	8
BP	GO:0050870	positive regulation of T cell activation	6/117	223/18800	0.0027305	0.0128281	0.007787	AKT1/BAD/PIK3CA/HMGB1/AMBRA1/TRAF6	6
BP	GO:0032881	regulation of polysaccharide metabolic process	3/117	45/18800	0.00275562	0.0129049	0.0078336	AKT1/IRS2/IRS1	3
BP	GO:0042088	T-helper 1 type immune response	3/117	45/18800	0.00275562	0.0129049	0.0078336	HRAS/HMGB1/TRAF6	3
BP	GO:0021915	neural tube development	5/117	154/18800	0.00277394	0.0129495	0.00786065	PRKACB/TSC2/PRKACA/TSC1/TRAF6	5
BP	GO:0097553	calcium ion transmembrane import into cytosol	5/117	154/18800	0.00277394	0.0129495	0.00786065	ITPR2/ITPR1/BAX/PRKACA/ATG5	5
BP	GO:1901655	cellular response to ketone	4/117	94/18800	0.00282439	0.0131641	0.00799093	AKT1/RPS6KB1/PRKAA1/IGF1R	4
BP	GO:0002790	peptide secretion	6/117	225/18800	0.00285387	0.0132436	0.00803922	TNF/BAD/RAF1/RAB1A/IRS2/IRS1	6
BP	GO:0036462	TRAIL-activated apoptotic signaling pathway	2/117	13/18800	0.00286397	0.0132436	0.00803922	CASP8/PTEN	2
BP	GO:0071287	cellular response to manganese ion	2/117	13/18800	0.00286397	0.0132436	0.00803922	EIF2S1/ATF4	2
BP	GO:0071361	cellular response to ethanol	2/117	13/18800	0.00286397	0.0132436	0.00803922	ITPR2/PRKAA1	2
BP	GO:1903265	positive regulation of tumor necrosis factor-mediated signaling pathway	2/117	13/18800	0.00286397	0.0132436	0.00803922	RIPK1/TRAF2	2
BP	GO:0001974	blood vessel remodeling	3/117	46/18800	0.00293461	0.0134644	0.00817325	BAK1/BAX/ATG5	3
BP	GO:0005978	glycogen biosynthetic process	3/117	46/18800	0.00293461	0.0134644	0.00817325	AKT1/IRS2/IRS1	3
BP	GO:0009250	glucan biosynthetic process	3/117	46/18800	0.00293461	0.0134644	0.00817325	AKT1/IRS2/IRS1	3
BP	GO:0010939	regulation of necrotic cell death	3/117	46/18800	0.00293461	0.0134644	0.00817325	CASP8/TP53/RIPK1	3
BP	GO:0060966	regulation of gene silencing by RNA	3/117	46/18800	0.00293461	0.0134644	0.00817325	TP53/TNF/RIPK1	3
BP	GO:0006644	phospholipid metabolic process	8/117	388/18800	0.00296071	0.013563	0.0082331	PIK3R3/PIK3CA/CAPN2/PIK3CD/PTEN/MTMR14/PIK3C3/MTMR4	8
BP	GO:0007346	regulation of mitotic cell cycle	9/117	478/18800	0.00301437	0.0137874	0.00836928	AKT1/TP53/TNF/BID/RPS6KB1/DAPK3/PTEN/AMBRA1/RPTOR	9
BP	GO:1903321	negative regulation of protein modification by small protein conjugation or removal	4/117	96/18800	0.00304766	0.0139123	0.00844514	AKT1/RELA/SQSTM1/ATG5	4
BP	GO:0050890	cognition	7/117	306/18800	0.00305115	0.0139123	0.00844514	MAPK1/FOS/TNF/KRAS/RPS6KB1/PTEN/TSC1	7
BP	GO:0051972	regulation of telomerase activity	3/117	47/18800	0.00312061	0.0141413	0.00858413	MAPK1/TP53/PARP4	3
BP	GO:0060711	labyrinthine layer development	3/117	47/18800	0.00312061	0.0141413	0.00858413	AKT1/MAPK1/CASP8	3
BP	GO:0070849	response to epidermal growth factor	3/117	47/18800	0.00312061	0.0141413	0.00858413	AKT1/MAPK1/DAB2IP	3
BP	GO:0120163	negative regulation of cold-induced thermogenesis	3/117	47/18800	0.00312061	0.0141413	0.00858413	ATF4/RHEB/STK11	3
BP	GO:0010596	negative regulation of endothelial cell migration	4/117	97/18800	0.00316369	0.0143145	0.00868926	GADD45A/TNF/DAB2IP/HMGB1	4
BP	GO:1990845	adaptive thermogenesis	5/117	159/18800	0.0031824	0.014377	0.00872721	ATF4/GADD45G/RHEB/STK11/IGF1R	5
BP	GO:0072593	reactive oxygen species metabolic process	6/117	231/18800	0.00324914	0.014656	0.00889658	GADD45A/TP53/TNF/RIPK1/PMAIP1/ATG5	6
BP	GO:0000079	regulation of cyclin-dependent protein serine/threonine kinase activity	4/117	98/18800	0.0032827	0.0147847	0.00897471	AKT1/ACTB/GADD45A/PTEN	4
BP	GO:0042176	regulation of protein catabolic process	8/117	395/18800	0.00330033	0.0148414	0.00900912	AKT1/TNF/CTSC/RELA/DAB2IP/PTEN/PRKACA/ATG7	8
BP	GO:0060324	face development	3/117	48/18800	0.00331369	0.0148511	0.00901502	MAPK1/RAF1/RRAS	3
BP	GO:0009886	post-embryonic animal morphogenesis	2/117	14/18800	0.00332774	0.0148511	0.00901502	BAK1/BAX	2
BP	GO:0010225	response to UV-C	2/117	14/18800	0.00332774	0.0148511	0.00901502	TP53/BAK1	2
BP	GO:0055012	ventricular cardiac muscle cell differentiation	2/117	14/18800	0.00332774	0.0148511	0.00901502	LMNA/ATG5	2
BP	GO:1902043	positive regulation of extrinsic apoptotic signaling pathway via death domain receptors	2/117	14/18800	0.00332774	0.0148511	0.00901502	PMAIP1/PTEN	2
BP	GO:0046486	glycerolipid metabolic process	8/117	396/18800	0.00335123	0.0149333	0.00906488	PIK3R3/PIK3CA/CAPN2/PIK3CD/PTEN/MTMR14/PIK3C3/MTMR4	8
BP	GO:0045732	positive regulation of protein catabolic process	6/117	233/18800	0.00338956	0.0150813	0.00915471	AKT1/TNF/CTSC/DAB2IP/PTEN/ATG7	6
BP	GO:0045058	T cell selection	3/117	49/18800	0.00351394	0.015611	0.00947628	CTSL/STK11/ATG5	3
BP	GO:0007568	aging	5/117	163/18800	0.00353909	0.015699	0.00952972	EIF2S1/FOS/BAK1/CTSC/RPS6KB1	5
BP	GO:0006626	protein targeting to mitochondrion	4/117	101/18800	0.00365798	0.0161533	0.00980549	BID/SH3GLB1/ATG13/PRKAA1	4
BP	GO:0032963	collagen metabolic process	4/117	101/18800	0.00365798	0.0161533	0.00980549	CTSK/CTSS/CTSL/CTSB	4
BP	GO:1904029	regulation of cyclin-dependent protein kinase activity	4/117	101/18800	0.00365798	0.0161533	0.00980549	AKT1/ACTB/GADD45A/PTEN	4
BP	GO:0001913	T cell mediated cytotoxicity	3/117	50/18800	0.00372144	0.0163599	0.00993086	CTSH/PRF1/CTSC	3
BP	GO:0038084	vascular endothelial growth factor signaling pathway	3/117	50/18800	0.00372144	0.0163599	0.00993086	PIK3CA/DAB2IP/PIK3CD	3
BP	GO:0048168	regulation of neuronal synaptic plasticity	3/117	50/18800	0.00372144	0.0163599	0.00993086	HRAS/KRAS/RAB8A	3
BP	GO:0043255	regulation of carbohydrate biosynthetic process	4/117	102/18800	0.00378927	0.0166084	0.0100817	AKT1/STK11/IRS2/IRS1	4
BP	GO:2001243	negative regulation of intrinsic apoptotic signaling pathway	4/117	102/18800	0.00378927	0.0166084	0.0100817	AKT1/MCL1/BID/BCL2L1	4
BP	GO:0034380	high-density lipoprotein particle assembly	2/117	15/18800	0.00382413	0.0166866	0.0101292	PRKACB/PRKACA	2
BP	GO:0046321	positive regulation of fatty acid oxidation	2/117	15/18800	0.00382413	0.0166866	0.0101292	IRS2/IRS1	2
BP	GO:0071380	cellular response to prostaglandin E stimulus	2/117	15/18800	0.00382413	0.0166866	0.0101292	AKT1/PRKAA1	2
BP	GO:0002700	regulation of production of molecular mediator of immune response	5/117	167/18800	0.00392366	0.0170453	0.010347	TNF/TRAF2/MAP3K7/ATG5/TRAF6	5
BP	GO:0010522	regulation of calcium ion transport into cytosol	4/117	103/18800	0.00392373	0.0170453	0.010347	BAK1/BAX/PRKACA/ATG5	4
BP	GO:1901796	regulation of signal transduction by p53 class mediator	4/117	103/18800	0.00392373	0.0170453	0.010347	AKT1/TP53/PMAIP1/STK11	4
BP	GO:0043124	negative regulation of I-kappaB kinase/NF-kappaB signaling	3/117	51/18800	0.00393627	0.0170746	0.0103647	CASP8/RIPK1/DAB2IP	3
BP	GO:0015980	energy derivation by oxidation of organic compounds	7/117	321/18800	0.00396663	0.0171809	0.0104293	AKT1/TP53/TNF/PIK3CA/BID/IRS2/IRS1	7
BP	GO:0060284	regulation of cell development	9/117	500/18800	0.00404972	0.017515	0.0106321	AKT1/TP53/TNF/BAD/RHEB/STK11/PTEN/ULK1/ULK2	9
BP	GO:0035196	production of miRNAs involved in gene silencing by miRNA	3/117	52/18800	0.00415851	0.0179328	0.0108857	TP53/TNF/RIPK1	3
BP	GO:0038093	Fc receptor signaling pathway	3/117	52/18800	0.00415851	0.0179328	0.0108857	MAPK8/MAP3K7/TRAF6	3
BP	GO:0072331	signal transduction by p53 class mediator	5/117	170/18800	0.0042311	0.0182191	0.0110595	AKT1/TP53/PMAIP1/BAX/STK11	5
BP	GO:0007204	positive regulation of cytosolic calcium ion concentration	7/117	325/18800	0.00424274	0.0182425	0.0110737	ITPR2/ITPR1/BAK1/BAX/PRKACA/ATG5/HMGB1	7
BP	GO:0019395	fatty acid oxidation	4/117	106/18800	0.00434642	0.0184991	0.0112294	AKT1/IRS2/IRS1/PRKAA1	4
BP	GO:0001780	neutrophil homeostasis	2/117	16/18800	0.00435272	0.0184991	0.0112294	PIK3CD/HMGB1	2
BP	GO:0010224	response to UV-B	2/117	16/18800	0.00435272	0.0184991	0.0112294	RELA/STK11	2
BP	GO:0034349	glial cell apoptotic process	2/117	16/18800	0.00435272	0.0184991	0.0112294	TP53/TRAF2	2
BP	GO:0045651	positive regulation of macrophage differentiation	2/117	16/18800	0.00435272	0.0184991	0.0112294	CASP8/RIPK1	2
BP	GO:0048266	behavioral response to pain	2/117	16/18800	0.00435272	0.0184991	0.0112294	AKT1/CAPN2	2
BP	GO:0061684	chaperone-mediated autophagy	2/117	16/18800	0.00435272	0.0184991	0.0112294	LAMP2/ATG5	2
BP	GO:0070431	nucleotide-binding oligomerization domain containing 2 signaling pathway	2/117	16/18800	0.00435272	0.0184991	0.0112294	RELA/NFKBIA	2
BP	GO:0043620	regulation of DNA-templated transcription in response to stress	3/117	53/18800	0.00438824	0.0186231	0.0113047	TP53/RELA/ATF4	3
BP	GO:0009636	response to toxic substance	6/117	247/18800	0.0045028	0.0190543	0.0115665	FOS/TNF/BAK1/ATF4/BAX/RPS6KB1	6
BP	GO:0021537	telencephalon development	6/117	247/18800	0.0045028	0.0190543	0.0115665	BAD/DAB2IP/BAX/PTEN/TSC1/IGF1R	6
BP	GO:0002822	regulation of adaptive immune response based on somatic recombination of immune receptors built from immunoglobulin superfamily domains	5/117	173/18800	0.00455539	0.0192491	0.0116847	TNF/TRAF2/MAP3K7/HMGB1/TRAF6	5
BP	GO:0048545	response to steroid hormone	7/117	330/18800	0.0046081	0.0194439	0.011803	FOS/TNF/DAXX/BAD/PIK3CA/RPS6KB1/IGF1R	7
BP	GO:0002067	glandular epithelial cell differentiation	3/117	54/18800	0.00462552	0.0194616	0.0118137	AKT1/BAD/RHEB	3
BP	GO:1903202	negative regulation of oxidative stress-induced cell death	3/117	54/18800	0.00462552	0.0194616	0.0118137	AKT1/ATF4/TSC1	3
BP	GO:0021761	limbic system development	4/117	108/18800	0.00464466	0.0195142	0.0118456	BAX/PTEN/TSC1/IGF1R	4
BP	GO:0010634	positive regulation of epithelial cell migration	5/117	174/18800	0.00466731	0.0195814	0.0118864	AKT1/CTSH/PIK3CD/RRAS/HMGB1	5
BP	GO:0015833	peptide transport	6/117	249/18800	0.00468149	0.0196129	0.0119056	TNF/BAD/RAF1/RAB1A/IRS2/IRS1	6
BP	GO:0001503	ossification	8/117	420/18800	0.00476685	0.0199171	0.0120902	AKT1/MAPK1/CTSK/TNF/ATF4/PRKACA/TP53INP2/TRAF6	8
BP	GO:0002706	regulation of lymphocyte mediated immunity	5/117	175/18800	0.00478118	0.0199171	0.0120902	TNF/TRAF2/MAP3K7/HMGB1/TRAF6	5
BP	GO:0043534	blood vessel endothelial cell migration	5/117	175/18800	0.00478118	0.0199171	0.0120902	AKT1/GADD45A/PIK3R3/TNF/HMGB1	5
BP	GO:0046890	regulation of lipid biosynthetic process	5/117	175/18800	0.00478118	0.0199171	0.0120902	AKT1/TNF/CAPN2/PRKAA1/IGF1R	5
BP	GO:0016311	dephosphorylation	8/117	422/18800	0.00490283	0.0202657	0.0123018	TNF/STK11/PTEN/MTMR14/IGBP1/TSC1/AMBRA1/MTMR4	8
BP	GO:0010663	positive regulation of striated muscle cell apoptotic process	2/117	17/18800	0.0049131	0.0202657	0.0123018	TP53/CAPN2	2
BP	GO:0010666	positive regulation of cardiac muscle cell apoptotic process	2/117	17/18800	0.0049131	0.0202657	0.0123018	TP53/CAPN2	2
BP	GO:0048569	post-embryonic animal organ development	2/117	17/18800	0.0049131	0.0202657	0.0123018	BAK1/BAX	2
BP	GO:0070230	positive regulation of lymphocyte apoptotic process	2/117	17/18800	0.0049131	0.0202657	0.0123018	TP53/BAX	2
BP	GO:2000811	negative regulation of anoikis	2/117	17/18800	0.0049131	0.0202657	0.0123018	MCL1/PIK3CA	2
BP	GO:2001267	regulation of cysteine-type endopeptidase activity involved in apoptotic signaling pathway	2/117	17/18800	0.0049131	0.0202657	0.0123018	FAS/BAX	2
BP	GO:0002824	positive regulation of adaptive immune response based on somatic recombination of immune receptors built from immunoglobulin superfamily domains	4/117	110/18800	0.00495639	0.0203989	0.0123827	TNF/TRAF2/MAP3K7/TRAF6	4
BP	GO:0071560	cellular response to transforming growth factor beta stimulus	6/117	252/18800	0.00495927	0.0203989	0.0123827	FOS/TP53/STK11/MAP3K7/MTMR4/IGF1R	6
BP	GO:0001938	positive regulation of endothelial cell proliferation	4/117	111/18800	0.00511739	0.0208394	0.01265	AKT1/PIK3CD/HMGB1/RPTOR	4
BP	GO:0071347	cellular response to interleukin-1	4/117	111/18800	0.00511739	0.0208394	0.01265	RELA/DAB2IP/MAP3K7/TRAF6	4
BP	GO:0043331	response to dsRNA	3/117	56/18800	0.00512304	0.0208394	0.01265	MAPK1/PMAIP1/NFKBIA	3
BP	GO:0048016	inositol phosphate-mediated signaling	3/117	56/18800	0.00512304	0.0208394	0.01265	ITPR2/TNF/ITPR1	3
BP	GO:0050879	multicellular organismal movement	3/117	56/18800	0.00512304	0.0208394	0.01265	TNF/ITPR1/RPS6KB1	3
BP	GO:0050881	musculoskeletal movement	3/117	56/18800	0.00512304	0.0208394	0.01265	TNF/ITPR1/RPS6KB1	3
BP	GO:0061756	leukocyte adhesion to vascular endothelial cell	3/117	56/18800	0.00512304	0.0208394	0.01265	TNF/RELA/TRAF6	3
BP	GO:0070918	production of small RNA involved in gene silencing by RNA	3/117	56/18800	0.00512304	0.0208394	0.01265	TP53/TNF/RIPK1	3
BP	GO:0001936	regulation of endothelial cell proliferation	5/117	178/18800	0.00513463	0.0208577	0.0126611	AKT1/TNF/PIK3CD/HMGB1/RPTOR	5
BP	GO:1990778	protein localization to cell periphery	7/117	337/18800	0.00515898	0.0209277	0.0127036	AKT1/ACTB/TNF/HRAS/BCL2L1/RAB8A/SQSTM1	7
BP	GO:0030073	insulin secretion	5/117	179/18800	0.00525646	0.0212644	0.0129081	TNF/BAD/RAF1/IRS2/IRS1	5
BP	GO:0030324	lung development	5/117	179/18800	0.00525646	0.0212644	0.0129081	CTSH/MAPK1/TNF/KRAS/CTSZ	5
BP	GO:0021987	cerebral cortex development	4/117	112/18800	0.00528187	0.0213086	0.0129349	BAD/DAB2IP/BAX/TSC1	4
BP	GO:0034440	lipid oxidation	4/117	112/18800	0.00528187	0.0213086	0.0129349	AKT1/IRS2/IRS1/PRKAA1	4
BP	GO:0010803	regulation of tumor necrosis factor-mediated signaling pathway	3/117	57/18800	0.00538341	0.0216885	0.0131655	CASP8/RIPK1/TRAF2	3
BP	GO:0010940	positive regulation of necrotic cell death	2/117	18/18800	0.00550486	0.0218246	0.0132481	TP53/RIPK1	2
BP	GO:0019081	viral translation	2/117	18/18800	0.00550486	0.0218246	0.0132481	ATG12/ATG5	2
BP	GO:0030540	female genitalia development	2/117	18/18800	0.00550486	0.0218246	0.0132481	BAK1/BAX	2
BP	GO:0036499	PERK-mediated unfolded protein response	2/117	18/18800	0.00550486	0.0218246	0.0132481	EIF2S1/ATF4	2
BP	GO:0043217	myelin maintenance	2/117	18/18800	0.00550486	0.0218246	0.0132481	AKT1/PTEN	2
BP	GO:0050746	regulation of lipoprotein metabolic process	2/117	18/18800	0.00550486	0.0218246	0.0132481	ATG13/ULK1	2
BP	GO:0060965	negative regulation of gene silencing by miRNA	2/117	18/18800	0.00550486	0.0218246	0.0132481	TP53/TNF	2
BP	GO:0072567	chemokine (C-X-C motif) ligand 2 production	2/117	18/18800	0.00550486	0.0218246	0.0132481	TNF/HMGB1	2
BP	GO:0150078	positive regulation of neuroinflammatory response	2/117	18/18800	0.00550486	0.0218246	0.0132481	TNF/CTSC	2
BP	GO:1902001	fatty acid transmembrane transport	2/117	18/18800	0.00550486	0.0218246	0.0132481	AKT1/IRS2	2
BP	GO:2000341	regulation of chemokine (C-X-C motif) ligand 2 production	2/117	18/18800	0.00550486	0.0218246	0.0132481	TNF/HMGB1	2
BP	GO:0010721	negative regulation of cell development	5/117	181/18800	0.00550624	0.0218246	0.0132481	TP53/TNF/PTEN/ULK1/ULK2	5
BP	GO:0071559	response to transforming growth factor beta	6/117	258/18800	0.00555096	0.0219469	0.0133223	FOS/TP53/STK11/MAP3K7/MTMR4/IGF1R	6
BP	GO:0010975	regulation of neuron projection development	8/117	431/18800	0.00555201	0.0219469	0.0133223	AKT1/DAB2IP/STK11/PTEN/TSC1/ULK1/ULK2/IGF1R	8
BP	GO:0090150	establishment of protein localization to membrane	6/117	259/18800	0.00565439	0.0223216	0.0135498	MAPK8/HRAS/BID/BBC3/BAX/RAB8A	6
BP	GO:0030323	respiratory tube development	5/117	183/18800	0.0057643	0.022725	0.0137946	CTSH/MAPK1/TNF/KRAS/CTSZ	5
BP	GO:0002821	positive regulation of adaptive immune response	4/117	115/18800	0.00579646	0.0227906	0.0138345	TNF/TRAF2/MAP3K7/TRAF6	4
BP	GO:0021782	glial cell development	4/117	115/18800	0.00579646	0.0227906	0.0138345	AKT1/TNF/KRAS/PTEN	4
BP	GO:0002218	activation of innate immune response	3/117	59/18800	0.0059277	0.0232135	0.0140912	MAP3K7/HMGB1/TRAF6	3
BP	GO:0002711	positive regulation of T cell mediated immunity	3/117	59/18800	0.0059277	0.0232135	0.0140912	TRAF2/MAP3K7/TRAF6	3
BP	GO:0031102	neuron projection regeneration	3/117	59/18800	0.0059277	0.0232135	0.0140912	PTEN/ULK1/IGF1R	3
BP	GO:0030336	negative regulation of cell migration	7/117	346/18800	0.00593848	0.0232248	0.0140981	AKT1/GADD45A/TNF/DAB2IP/RRAS/PTEN/HMGB1	7
BP	GO:0010466	negative regulation of peptidase activity	6/117	262/18800	0.00597315	0.0233062	0.0141475	AKT1/BIRC5/TNF/CTSB/RAF1/IGBP1	6
BP	GO:0071675	regulation of mononuclear cell migration	4/117	116/18800	0.00597515	0.0233062	0.0141475	AKT1/MAPK1/TNF/HMGB1	4
BP	GO:0001906	cell killing	5/117	185/18800	0.00603079	0.0234611	0.0142415	CTSH/PRF1/MAPK8/CTSC/BCL2L1	5
BP	GO:0007565	female pregnancy	5/117	185/18800	0.00603079	0.0234611	0.0142415	AKT1/FOS/CTSB/CAPN2/VMP1	5
BP	GO:0045947	negative regulation of translational initiation	2/117	19/18800	0.00612759	0.0235264	0.0142811	EIF2S1/ATF4	2
BP	GO:0048643	positive regulation of skeletal muscle tissue development	2/117	19/18800	0.00612759	0.0235264	0.0142811	RPS6KB1/PRKAA1	2
BP	GO:0048670	regulation of collateral sprouting	2/117	19/18800	0.00612759	0.0235264	0.0142811	ULK1/ULK2	2
BP	GO:0051797	regulation of hair follicle development	2/117	19/18800	0.00612759	0.0235264	0.0142811	TNF/TRADD	2
BP	GO:0055093	response to hyperoxia	2/117	19/18800	0.00612759	0.0235264	0.0142811	FAS/ATG7	2
BP	GO:0060149	negative regulation of posttranscriptional gene silencing	2/117	19/18800	0.00612759	0.0235264	0.0142811	TP53/TNF	2
BP	GO:0060546	negative regulation of necroptotic process	2/117	19/18800	0.00612759	0.0235264	0.0142811	CASP8/RIPK1	2
BP	GO:0060967	negative regulation of gene silencing by RNA	2/117	19/18800	0.00612759	0.0235264	0.0142811	TP53/TNF	2
BP	GO:0098780	response to mitochondrial depolarisation	2/117	19/18800	0.00612759	0.0235264	0.0142811	SQSTM1/AMBRA1	2
BP	GO:1900369	negative regulation of RNA interference	2/117	19/18800	0.00612759	0.0235264	0.0142811	TP53/TNF	2
BP	GO:0002708	positive regulation of lymphocyte mediated immunity	4/117	117/18800	0.00615747	0.0235796	0.0143134	TNF/TRAF2/MAP3K7/TRAF6	4
BP	GO:0042752	regulation of circadian rhythm	4/117	117/18800	0.00615747	0.0235796	0.0143134	TP53/MAPK8/PRKAA1/ATG7	4
BP	GO:0007611	learning or memory	6/117	264/18800	0.00619282	0.0236641	0.0143647	MAPK1/FOS/KRAS/RPS6KB1/PTEN/TSC1	6
BP	GO:0051205	protein insertion into membrane	3/117	60/18800	0.00621173	0.0236641	0.0143647	MAPK8/BBC3/BAX	3
BP	GO:0090311	regulation of protein deacetylation	3/117	60/18800	0.00621173	0.0236641	0.0143647	TP53/MAPK8/PRKAA1	3
BP	GO:1903078	positive regulation of protein localization to plasma membrane	3/117	60/18800	0.00621173	0.0236641	0.0143647	AKT1/TNF/SQSTM1	3
BP	GO:0009306	protein secretion	7/117	350/18800	0.00631191	0.0240147	0.0145775	TNF/BAD/RAF1/RAB8A/PIK3C3/IRS2/IRS1	7
BP	GO:0071346	cellular response to interferon-gamma	4/117	118/18800	0.00634346	0.0241035	0.0146315	TP53/TNF/RPS6KB1/DAPK3	4
BP	GO:0035592	establishment of protein localization to extracellular region	7/117	351/18800	0.00640795	0.0243171	0.0147611	TNF/BAD/RAF1/RAB8A/PIK3C3/IRS2/IRS1	7
BP	GO:0002819	regulation of adaptive immune response	5/117	188/18800	0.00644664	0.024401	0.014812	TNF/TRAF2/MAP3K7/HMGB1/TRAF6	5
BP	GO:0031099	regeneration	5/117	188/18800	0.00644664	0.024401	0.014812	TNF/BAK1/PTEN/ULK1/IGF1R	5
BP	GO:0051897	positive regulation of protein kinase B signaling	4/117	119/18800	0.00653315	0.024665	0.0149723	TNF/PIK3CA/PIK3CD/IGF1R	4
BP	GO:2000278	regulation of DNA biosynthetic process	4/117	119/18800	0.00653315	0.024665	0.0149723	MAPK1/TP53/TNF/PARP4	4
BP	GO:0051648	vesicle localization	5/117	189/18800	0.00658962	0.0248462	0.0150823	RAB1A/STK11/PTEN/SNAP29/WIPI1	5
BP	GO:0006007	glucose catabolic process	2/117	20/18800	0.00678089	0.0252438	0.0153236	TP53/BAD	2
BP	GO:0032495	response to muramyl dipeptide	2/117	20/18800	0.00678089	0.0252438	0.0153236	RELA/NFKBIA	2
BP	GO:0060716	labyrinthine layer blood vessel development	2/117	20/18800	0.00678089	0.0252438	0.0153236	AKT1/MAPK1	2
BP	GO:0062099	NA	2/117	20/18800	0.00678089	0.0252438	0.0153236	CASP8/RIPK1	2
BP	GO:0070314	G1 to G0 transition	2/117	20/18800	0.00678089	0.0252438	0.0153236	TP53/STK11	2
BP	GO:0070584	mitochondrion morphogenesis	2/117	20/18800	0.00678089	0.0252438	0.0153236	BCL2L1/BAX	2
BP	GO:0071379	cellular response to prostaglandin stimulus	2/117	20/18800	0.00678089	0.0252438	0.0153236	AKT1/PRKAA1	2
BP	GO:1902004	positive regulation of amyloid-beta formation	2/117	20/18800	0.00678089	0.0252438	0.0153236	TNF/RELA	2
BP	GO:1903204	negative regulation of oxidative stress-induced neuron death	2/117	20/18800	0.00678089	0.0252438	0.0153236	ATF4/TSC1	2
BP	GO:2000010	positive regulation of protein localization to cell surface	2/117	20/18800	0.00678089	0.0252438	0.0153236	AKT1/TNF	2
BP	GO:0022617	extracellular matrix disassembly	3/117	62/18800	0.00680388	0.0252974	0.0153562	CTSK/CTSS/CTSV	3
BP	GO:0010639	negative regulation of organelle organization	7/117	356/18800	0.00690462	0.0256072	0.0155442	AKT1/TP53/LMNA/PIK3CA/SPTAN1/BCL2L1/TSC2	7
BP	GO:0051480	regulation of cytosolic calcium ion concentration	7/117	356/18800	0.00690462	0.0256072	0.0155442	ITPR2/ITPR1/BAK1/BAX/PRKACA/ATG5/HMGB1	7
BP	GO:0038127	ERBB signaling pathway	4/117	121/18800	0.00692375	0.0256135	0.0155481	AKT1/MAPK1/PIK3CA/DAB2IP	4
BP	GO:0051101	regulation of DNA binding	4/117	121/18800	0.00692375	0.0256135	0.0155481	MAPK8/NFKBIA/HMGB1/TRAF6	4
BP	GO:0032615	interleukin-12 production	3/117	63/18800	0.0071121	0.0260807	0.0158316	RELA/HMGB1/TRAF6	3
BP	GO:0032623	interleukin-2 production	3/117	63/18800	0.0071121	0.0260807	0.0158316	TRAF2/MAP3K7/TRAF6	3
BP	GO:0032655	regulation of interleukin-12 production	3/117	63/18800	0.0071121	0.0260807	0.0158316	RELA/HMGB1/TRAF6	3
BP	GO:0032663	regulation of interleukin-2 production	3/117	63/18800	0.0071121	0.0260807	0.0158316	TRAF2/MAP3K7/TRAF6	3
BP	GO:0051893	regulation of focal adhesion assembly	3/117	63/18800	0.0071121	0.0260807	0.0158316	DAPK3/PTEN/TSC1	3
BP	GO:0070542	response to fatty acid	3/117	63/18800	0.0071121	0.0260807	0.0158316	BAD/PIK3CA/IRS1	3
BP	GO:0090109	regulation of cell-substrate junction assembly	3/117	63/18800	0.0071121	0.0260807	0.0158316	DAPK3/PTEN/TSC1	3
BP	GO:0071901	negative regulation of protein serine/threonine kinase activity	4/117	122/18800	0.00712472	0.0260944	0.01584	AKT1/GADD45A/DAB2IP/PTEN	4
BP	GO:0071692	protein localization to extracellular region	7/117	359/18800	0.00721606	0.0263961	0.0160231	TNF/BAD/RAF1/RAB8A/PIK3C3/IRS2/IRS1	7
BP	GO:0022898	regulation of transmembrane transporter activity	6/117	273/18800	0.00725487	0.0264722	0.0160693	CAPN1/ACTB/CTSS/RIPK1/PRKACA/VMP1	6
BP	GO:0043270	positive regulation of ion transport	6/117	273/18800	0.00725487	0.0264722	0.0160693	AKT1/CTSS/BAK1/ATF4/BAX/VMP1	6
BP	GO:0001952	regulation of cell-matrix adhesion	4/117	123/18800	0.00732951	0.0267114	0.0162145	DAPK3/RRAS/PTEN/TSC1	4
BP	GO:0045670	regulation of osteoclast differentiation	3/117	64/18800	0.00742849	0.0269028	0.0163307	FOS/TNF/TRAF6	3
BP	GO:0050771	negative regulation of axonogenesis	3/117	64/18800	0.00742849	0.0269028	0.0163307	PTEN/ULK1/ULK2	3
BP	GO:0050767	regulation of neurogenesis	7/117	361/18800	0.00742941	0.0269028	0.0163307	TP53/TNF/RHEB/STK11/PTEN/ULK1/ULK2	7
BP	GO:2000146	negative regulation of cell motility	7/117	361/18800	0.00742941	0.0269028	0.0163307	AKT1/GADD45A/TNF/DAB2IP/RRAS/PTEN/HMGB1	7
BP	GO:0003091	renal water homeostasis	2/117	21/18800	0.00746436	0.0269028	0.0163307	PRKACB/PRKACA	2
BP	GO:0006590	thyroid hormone generation	2/117	21/18800	0.00746436	0.0269028	0.0163307	CTSK/CTSB	2
BP	GO:0032069	regulation of nuclease activity	2/117	21/18800	0.00746436	0.0269028	0.0163307	AKT1/HMGB1	2
BP	GO:0033762	response to glucagon	2/117	21/18800	0.00746436	0.0269028	0.0163307	RPS6KB1/STK11	2
BP	GO:0071243	cellular response to arsenic-containing substance	2/117	21/18800	0.00746436	0.0269028	0.0163307	DAXX/ATF4	2
BP	GO:0006874	cellular calcium ion homeostasis	8/117	456/18800	0.00770232	0.0276926	0.0168101	ITPR2/ITPR1/BAK1/ATF4/BAX/PRKACA/ATG5/HMGB1	8
BP	GO:0022407	regulation of cell-cell adhesion	8/117	456/18800	0.00770232	0.0276926	0.0168101	AKT1/TNF/BAD/RELA/PIK3CA/HMGB1/AMBRA1/TRAF6	8
BP	GO:0070613	regulation of protein processing	3/117	65/18800	0.0077531	0.0278411	0.0169003	CTSZ/PRKACB/PRKACA	3
BP	GO:0015909	long-chain fatty acid transport	3/117	66/18800	0.00808598	0.028872	0.017526	AKT1/RPS6KB1/IRS2	3
BP	GO:0034605	cellular response to heat	3/117	66/18800	0.00808598	0.028872	0.017526	EIF2S1/DAXX/PRKACA	3
BP	GO:0071674	mononuclear cell migration	5/117	199/18800	0.00814397	0.028872	0.017526	AKT1/MAPK1/TNF/PIK3CD/HMGB1	5
BP	GO:0002223	stimulatory C-type lectin receptor signaling pathway	2/117	22/18800	0.00817761	0.028872	0.017526	MAP3K7/TRAF6	2
BP	GO:0006925	inflammatory cell apoptotic process	2/117	22/18800	0.00817761	0.028872	0.017526	CTSL/PIK3CD	2
BP	GO:0010042	response to manganese ion	2/117	22/18800	0.00817761	0.028872	0.017526	EIF2S1/ATF4	2
BP	GO:0010888	negative regulation of lipid storage	2/117	22/18800	0.00817761	0.028872	0.017526	TNF/NFKBIA	2
BP	GO:0021904	dorsal/ventral neural tube patterning	2/117	22/18800	0.00817761	0.028872	0.017526	PRKACB/PRKACA	2
BP	GO:0032780	negative regulation of ATPase activity	2/117	22/18800	0.00817761	0.028872	0.017526	TP53/TSC1	2
BP	GO:0045061	thymic T cell selection	2/117	22/18800	0.00817761	0.028872	0.017526	STK11/ATG5	2
BP	GO:0050765	negative regulation of phagocytosis	2/117	22/18800	0.00817761	0.028872	0.017526	ATG5/HMGB1	2
BP	GO:0051000	positive regulation of nitric-oxide synthase activity	2/117	22/18800	0.00817761	0.028872	0.017526	AKT1/TNF	2
BP	GO:0140467	NA	2/117	22/18800	0.00817761	0.028872	0.017526	EIF2S1/ATF4	2
BP	GO:2000810	regulation of bicellular tight junction assembly	2/117	22/18800	0.00817761	0.028872	0.017526	TNF/PRKACA	2
BP	GO:0046879	hormone secretion	6/117	281/18800	0.00830459	0.029242	0.0177506	TNF/BAD/RAF1/RAB1A/IRS2/IRS1	6
BP	GO:0051146	striated muscle cell differentiation	6/117	281/18800	0.00830459	0.029242	0.0177506	AKT1/LMNA/KRAS/CAPN2/ATG5/TSC1	6
BP	GO:0007179	transforming growth factor beta receptor signaling pathway	5/117	200/18800	0.00831224	0.029242	0.0177506	FOS/TP53/STK11/MAP3K7/MTMR4	5
BP	GO:0051271	negative regulation of cellular component movement	7/117	369/18800	0.00832989	0.0292691	0.0177671	AKT1/GADD45A/TNF/DAB2IP/RRAS/PTEN/HMGB1	7
BP	GO:0006417	regulation of translation	8/117	463/18800	0.00840408	0.0294945	0.0179039	AKT1/EIF2S1/TNF/ATF4/RPS6KB1/DAPK3/RPS6KB2/TSC1	8
BP	GO:0033692	cellular polysaccharide biosynthetic process	3/117	67/18800	0.00842717	0.0295051	0.0179104	AKT1/IRS2/IRS1	3
BP	GO:1904377	positive regulation of protein localization to cell periphery	3/117	67/18800	0.00842717	0.0295051	0.0179104	AKT1/TNF/SQSTM1	3
BP	GO:1901888	regulation of cell junction assembly	5/117	201/18800	0.0084829	0.0296649	0.0180074	TNF/DAPK3/PTEN/PRKACA/TSC1	5
BP	GO:0051251	positive regulation of lymphocyte activation	7/117	371/18800	0.00856708	0.0299237	0.0181645	AKT1/BAD/PIK3CA/IRS2/HMGB1/AMBRA1/TRAF6	7
BP	GO:0072659	protein localization to plasma membrane	6/117	283/18800	0.00858325	0.0299446	0.0181772	AKT1/ACTB/TNF/BCL2L1/RAB8A/SQSTM1	6
BP	GO:0002720	positive regulation of cytokine production involved in immune response	3/117	68/18800	0.00877672	0.030475	0.0184991	TRAF2/MAP3K7/TRAF6	3
BP	GO:0061180	mammary gland epithelium development	3/117	68/18800	0.00877672	0.030475	0.0184991	AKT1/MAPK1/BAX	3
BP	GO:0150116	NA	3/117	68/18800	0.00877672	0.030475	0.0184991	DAPK3/PTEN/TSC1	3
BP	GO:1903317	regulation of protein maturation	3/117	68/18800	0.00877672	0.030475	0.0184991	CTSZ/PRKACB/PRKACA	3
BP	GO:0002064	epithelial cell development	5/117	203/18800	0.0088315	0.030593	0.0185707	AKT1/TNF/BAD/ATF4/RHEB	5
BP	GO:0060541	respiratory system development	5/117	203/18800	0.0088315	0.030593	0.0185707	CTSH/MAPK1/TNF/KRAS/CTSZ	5
BP	GO:0034695	response to prostaglandin E	2/117	23/18800	0.00892025	0.0307916	0.0186913	AKT1/PRKAA1	2
BP	GO:1990840	response to lectin	2/117	23/18800	0.00892025	0.0307916	0.0186913	MAP3K7/TRAF6	2
BP	GO:1990858	cellular response to lectin	2/117	23/18800	0.00892025	0.0307916	0.0186913	MAP3K7/TRAF6	2
BP	GO:0055074	calcium ion homeostasis	8/117	468/18800	0.00893403	0.030803	0.0186982	ITPR2/ITPR1/BAK1/ATF4/BAX/PRKACA/ATG5/HMGB1	8
BP	GO:0010595	positive regulation of endothelial cell migration	4/117	131/18800	0.00910883	0.0313689	0.0190418	AKT1/PIK3CD/RRAS/HMGB1	4
BP	GO:0042886	amide transport	6/117	287/18800	0.00916063	0.0315104	0.0191277	TNF/BAD/RAF1/RAB1A/IRS2/IRS1	6
BP	GO:0030900	forebrain development	7/117	376/18800	0.00918181	0.0315373	0.019144	BAD/KRAS/DAB2IP/BAX/PTEN/TSC1/IGF1R	7
BP	GO:0044703	multi-organism reproductive process	5/117	205/18800	0.00918989	0.0315373	0.019144	AKT1/FOS/CTSB/CAPN2/VMP1	5
BP	GO:0032890	regulation of organic acid transport	3/117	70/18800	0.00950106	0.0325671	0.0197691	AKT1/TNF/IRS2	3
BP	GO:0009914	hormone transport	6/117	290/18800	0.00961157	0.0328008	0.0199109	TNF/BAD/RAF1/RAB1A/IRS2/IRS1	6
BP	GO:0002755	MyD88-dependent toll-like receptor signaling pathway	2/117	24/18800	0.00969189	0.0328008	0.0199109	MAP3K7/TRAF6	2
BP	GO:0019835	cytolysis	2/117	24/18800	0.00969189	0.0328008	0.0199109	PRF1/RRAGA	2
BP	GO:0036003	positive regulation of transcription from RNA polymerase II promoter in response to stress	2/117	24/18800	0.00969189	0.0328008	0.0199109	TP53/ATF4	2
BP	GO:0045649	regulation of macrophage differentiation	2/117	24/18800	0.00969189	0.0328008	0.0199109	CASP8/RIPK1	2
BP	GO:0048011	neurotrophin TRK receptor signaling pathway	2/117	24/18800	0.00969189	0.0328008	0.0199109	RAF1/AKT1S1	2
BP	GO:0060547	negative regulation of necrotic cell death	2/117	24/18800	0.00969189	0.0328008	0.0199109	CASP8/RIPK1	2
BP	GO:1901028	regulation of mitochondrial outer membrane permeabilization involved in apoptotic signaling pathway	2/117	24/18800	0.00969189	0.0328008	0.0199109	MAPK8/BBC3	2
BP	GO:1901863	positive regulation of muscle tissue development	2/117	24/18800	0.00969189	0.0328008	0.0199109	RPS6KB1/PRKAA1	2
BP	GO:2000209	regulation of anoikis	2/117	24/18800	0.00969189	0.0328008	0.0199109	MCL1/PIK3CA	2
BP	GO:2000637	positive regulation of gene silencing by miRNA	2/117	24/18800	0.00969189	0.0328008	0.0199109	TP53/RIPK1	2
BP	GO:0034765	regulation of ion transmembrane transport	8/117	476/18800	0.0098336	0.0332342	0.020174	CAPN1/CTSS/TNF/RIPK1/BAX/PRKACA/ATG5/VMP1	8
BP	GO:1903052	positive regulation of proteolysis involved in cellular protein catabolic process	4/117	134/18800	0.00984257	0.0332342	0.020174	AKT1/CTSC/DAB2IP/PTEN	4
BP	GO:2000379	positive regulation of reactive oxygen species metabolic process	3/117	71/18800	0.00987593	0.0333086	0.0202192	GADD45A/TP53/RIPK1	3
BP	GO:0016051	carbohydrate biosynthetic process	5/117	209/18800	0.0099366	0.0334748	0.0203201	AKT1/ATF4/STK11/IRS2/IRS1	5
BP	GO:0050810	regulation of steroid biosynthetic process	3/117	72/18800	0.0102593	0.0345225	0.020956	TNF/PRKAA1/IGF1R	3
BP	GO:0010977	negative regulation of neuron projection development	4/117	136/18800	0.0103525	0.0347961	0.0211221	PTEN/TSC1/ULK1/ULK2	4
BP	GO:0035821	modification of morphology or physiology of other organism	2/117	25/18800	0.0104922	0.0349857	0.0212372	PRF1/BCL2L1	2
BP	GO:0048668	collateral sprouting	2/117	25/18800	0.0104922	0.0349857	0.0212372	ULK1/ULK2	2
BP	GO:0060074	synapse maturation	2/117	25/18800	0.0104922	0.0349857	0.0212372	DAB2IP/PTEN	2
BP	GO:0060148	positive regulation of posttranscriptional gene silencing	2/117	25/18800	0.0104922	0.0349857	0.0212372	TP53/RIPK1	2
BP	GO:1900370	positive regulation of RNA interference	2/117	25/18800	0.0104922	0.0349857	0.0212372	TP53/RIPK1	2
BP	GO:1902993	positive regulation of amyloid precursor protein catabolic process	2/117	25/18800	0.0104922	0.0349857	0.0212372	TNF/RELA	2
BP	GO:1903959	regulation of anion transmembrane transport	2/117	25/18800	0.0104922	0.0349857	0.0212372	TNF/RIPK1	2
BP	GO:0001701	in utero embryonic development	7/117	387/18800	0.0106476	0.0353559	0.021462	AKT1/MAPK1/CASP8/TP53/BCL2L1/CAPN2/TRAF6	7
BP	GO:0005977	glycogen metabolic process	3/117	73/18800	0.0106513	0.0353559	0.021462	AKT1/IRS2/IRS1	3
BP	GO:0032732	positive regulation of interleukin-1 production	3/117	73/18800	0.0106513	0.0353559	0.021462	CASP8/TNF/HMGB1	3
BP	GO:0043462	regulation of ATPase activity	3/117	73/18800	0.0106513	0.0353559	0.021462	TP53/TSC1/VMP1	3
BP	GO:0044706	multi-multicellular organism process	5/117	213/18800	0.010724	0.0355574	0.0215843	AKT1/FOS/CTSB/CAPN2/VMP1	5
BP	GO:0002705	positive regulation of leukocyte mediated immunity	4/117	138/18800	0.0108792	0.0360311	0.0218718	TNF/TRAF2/MAP3K7/TRAF6	4
BP	GO:0000271	polysaccharide biosynthetic process	3/117	74/18800	0.0110518	0.0364387	0.0221192	AKT1/IRS2/IRS1	3
BP	GO:0002637	regulation of immunoglobulin production	3/117	74/18800	0.0110518	0.0364387	0.0221192	TNF/TRAF2/TRAF6	3
BP	GO:0006073	cellular glucan metabolic process	3/117	74/18800	0.0110518	0.0364387	0.0221192	AKT1/IRS2/IRS1	3
BP	GO:0044042	glucan metabolic process	3/117	74/18800	0.0110518	0.0364387	0.0221192	AKT1/IRS2/IRS1	3
BP	GO:0006869	lipid transport	7/117	391/18800	0.0112207	0.0369113	0.0224061	AKT1/RPS6KB1/ATG2A/IRS2/VMP1/PRKAA1/ATG2B	7
BP	GO:0030099	myeloid cell differentiation	7/117	391/18800	0.0112207	0.0369113	0.0224061	CASP8/FOS/TNF/RIPK1/PIK3CD/NFKBIA/TRAF6	7
BP	GO:0030878	thyroid gland development	2/117	26/18800	0.0113206	0.0369113	0.0224061	MAPK1/RAF1	2
BP	GO:0033598	mammary gland epithelial cell proliferation	2/117	26/18800	0.0113206	0.0369113	0.0224061	MAPK1/BAX	2
BP	GO:0034377	plasma lipoprotein particle assembly	2/117	26/18800	0.0113206	0.0369113	0.0224061	PRKACB/PRKACA	2
BP	GO:0036296	response to increased oxygen levels	2/117	26/18800	0.0113206	0.0369113	0.0224061	FAS/ATG7	2
BP	GO:0048641	regulation of skeletal muscle tissue development	2/117	26/18800	0.0113206	0.0369113	0.0224061	RPS6KB1/PRKAA1	2
BP	GO:0060561	apoptotic process involved in morphogenesis	2/117	26/18800	0.0113206	0.0369113	0.0224061	BAK1/BAX	2
BP	GO:0071549	cellular response to dexamethasone stimulus	2/117	26/18800	0.0113206	0.0369113	0.0224061	RPS6KB1/IGF1R	2
BP	GO:1904385	cellular response to angiotensin	2/117	26/18800	0.0113206	0.0369113	0.0224061	RELA/IGF1R	2
BP	GO:0034341	response to interferon-gamma	4/117	140/18800	0.0114229	0.0372035	0.0225835	TP53/TNF/RPS6KB1/DAPK3	4
BP	GO:0006635	fatty acid beta-oxidation	3/117	76/18800	0.0118787	0.0386453	0.0234587	AKT1/IRS2/IRS1	3
BP	GO:0040013	negative regulation of locomotion	7/117	396/18800	0.0119682	0.0388935	0.0236093	AKT1/GADD45A/TNF/DAB2IP/RRAS/PTEN/HMGB1	7
BP	GO:0030183	B cell differentiation	4/117	142/18800	0.0119839	0.0389013	0.0236141	TP53/BAK1/BAD/BAX	4
BP	GO:0006091	generation of precursor metabolites and energy	8/117	494/18800	0.0121031	0.0390541	0.0237068	AKT1/TP53/TNF/PIK3CA/BID/IRS2/IRS1/PRKAA1	8
BP	GO:0072503	cellular divalent inorganic cation homeostasis	8/117	494/18800	0.0121031	0.0390541	0.0237068	ITPR2/ITPR1/BAK1/ATF4/BAX/PRKACA/ATG5/HMGB1	8
BP	GO:0032409	regulation of transporter activity	6/117	305/18800	0.0121067	0.0390541	0.0237068	CAPN1/ACTB/CTSS/RIPK1/PRKACA/VMP1	6
BP	GO:0002220	innate immune response activating cell surface receptor signaling pathway	2/117	27/18800	0.012177	0.0390541	0.0237068	MAP3K7/TRAF6	2
BP	GO:0002418	immune response to tumor cell	2/117	27/18800	0.012177	0.0390541	0.0237068	PRF1/HMGB1	2
BP	GO:0010586	miRNA metabolic process	2/117	27/18800	0.012177	0.0390541	0.0237068	RELA/HRAS	2
BP	GO:0016540	protein autoprocessing	2/117	27/18800	0.012177	0.0390541	0.0237068	CTSL/CAPN2	2
BP	GO:0033032	regulation of myeloid cell apoptotic process	2/117	27/18800	0.012177	0.0390541	0.0237068	PIK3CD/PTEN	2
BP	GO:0034063	stress granule assembly	2/117	27/18800	0.012177	0.0390541	0.0237068	EIF2S1/PRKAA1	2
BP	GO:0042403	thyroid hormone metabolic process	2/117	27/18800	0.012177	0.0390541	0.0237068	CTSK/CTSB	2
BP	GO:0050687	negative regulation of defense response to virus	2/117	27/18800	0.012177	0.0390541	0.0237068	ATG12/ATG5	2
BP	GO:0016050	vesicle organization	6/117	306/18800	0.0122878	0.0393665	0.0238965	RAB1A/RAB8A/PIK3C3/SNAP29/SQSTM1/STX17	6
BP	GO:0033077	T cell differentiation in thymus	3/117	78/18800	0.0127404	0.0407277	0.0247228	TP53/STK11/ATG5	3
BP	GO:0043537	negative regulation of blood vessel endothelial cell migration	3/117	78/18800	0.0127404	0.0407277	0.0247228	GADD45A/TNF/HMGB1	3
BP	GO:0031333	negative regulation of protein complex assembly	4/117	145/18800	0.012858	0.0410591	0.0249239	SPTAN1/RAF1/HMGB1/ULK1	4
BP	GO:1903050	regulation of proteolysis involved in cellular protein catabolic process	5/117	223/18800	0.0128774	0.0410765	0.0249345	AKT1/CTSC/DAB2IP/PTEN/PRKACA	5
BP	GO:0002360	T cell lineage commitment	2/117	28/18800	0.0130609	0.041258	0.0250447	CTSL/TP53	2
BP	GO:0002758	innate immune response-activating signal transduction	2/117	28/18800	0.0130609	0.041258	0.0250447	MAP3K7/TRAF6	2
BP	GO:0008053	mitochondrial fusion	2/117	28/18800	0.0130609	0.041258	0.0250447	BAK1/BAX	2
BP	GO:0010800	positive regulation of peptidyl-threonine phosphorylation	2/117	28/18800	0.0130609	0.041258	0.0250447	MAPK1/RPTOR	2
BP	GO:0032801	receptor catabolic process	2/117	28/18800	0.0130609	0.041258	0.0250447	CAPN1/SH3GLB1	2
BP	GO:0042634	regulation of hair cycle	2/117	28/18800	0.0130609	0.041258	0.0250447	TNF/TRADD	2
BP	GO:0048873	homeostasis of number of cells within a tissue	2/117	28/18800	0.0130609	0.041258	0.0250447	KRAS/BAX	2
BP	GO:0050996	positive regulation of lipid catabolic process	2/117	28/18800	0.0130609	0.041258	0.0250447	IRS2/IRS1	2
BP	GO:0060544	regulation of necroptotic process	2/117	28/18800	0.0130609	0.041258	0.0250447	CASP8/RIPK1	2
BP	GO:0010959	regulation of metal ion transport	7/117	403/18800	0.0130746	0.041258	0.0250447	AKT1/BAK1/ATF4/BAX/PRKACA/ATG5/VMP1	7
BP	GO:0034637	cellular carbohydrate biosynthetic process	3/117	79/18800	0.0131843	0.0414707	0.0251738	AKT1/IRS2/IRS1	3
BP	GO:0048145	regulation of fibroblast proliferation	3/117	79/18800	0.0131843	0.0414707	0.0251738	TP53/DAB2IP/BAX	3
BP	GO:0048708	astrocyte differentiation	3/117	79/18800	0.0131843	0.0414707	0.0251738	MAPK1/TNF/KRAS	3
BP	GO:0070372	regulation of ERK1 and ERK2 cascade	6/117	311/18800	0.0132221	0.0415451	0.0252189	TNF/HRAS/DAB2IP/RRAS/PTEN/HMGB1	6
BP	GO:0060537	muscle tissue development	7/117	405/18800	0.0134038	0.0420712	0.0255383	FOS/LMNA/RPS6KB1/PTEN/ATG5/TSC1/PRKAA1	7
BP	GO:0001890	placenta development	4/117	147/18800	0.0134628	0.0421663	0.025596	AKT1/MAPK1/CASP8/CTSB	4
BP	GO:0050796	regulation of insulin secretion	4/117	147/18800	0.0134628	0.0421663	0.025596	TNF/BAD/IRS2/IRS1	4
BP	GO:0008306	associative learning	3/117	80/18800	0.013637	0.0425758	0.0258446	FOS/KRAS/TSC1	3
BP	GO:0021766	hippocampus development	3/117	80/18800	0.013637	0.0425758	0.0258446	PTEN/TSC1/IGF1R	3
BP	GO:0051279	regulation of release of sequestered calcium ion into cytosol	3/117	80/18800	0.013637	0.0425758	0.0258446	BAX/PRKACA/ATG5	3
BP	GO:0070588	calcium ion transmembrane transport	6/117	314/18800	0.013806	0.0430579	0.0261372	ITPR2/ITPR1/BAX/PRKACA/ATG5/VMP1	6
BP	GO:0001773	myeloid dendritic cell activation	2/117	29/18800	0.0139718	0.0432083	0.0262286	HMGB1/TRAF6	2
BP	GO:0010464	regulation of mesenchymal cell proliferation	2/117	29/18800	0.0139718	0.0432083	0.0262286	LMNA/IRS2	2
BP	GO:0032369	negative regulation of lipid transport	2/117	29/18800	0.0139718	0.0432083	0.0262286	AKT1/IRS2	2
BP	GO:0048265	response to pain	2/117	29/18800	0.0139718	0.0432083	0.0262286	AKT1/CAPN2	2
BP	GO:0048679	regulation of axon regeneration	2/117	29/18800	0.0139718	0.0432083	0.0262286	PTEN/IGF1R	2
BP	GO:0065005	protein-lipid complex assembly	2/117	29/18800	0.0139718	0.0432083	0.0262286	PRKACB/PRKACA	2
BP	GO:1900117	regulation of execution phase of apoptosis	2/117	29/18800	0.0139718	0.0432083	0.0262286	TP53/BCL2L1	2
BP	GO:1902175	regulation of oxidative stress-induced intrinsic apoptotic signaling pathway	2/117	29/18800	0.0139718	0.0432083	0.0262286	AKT1/MCL1	2
BP	GO:0048144	fibroblast proliferation	3/117	81/18800	0.0140985	0.0435541	0.0264385	TP53/DAB2IP/BAX	3
BP	GO:0043535	regulation of blood vessel endothelial cell migration	4/117	150/18800	0.0144036	0.0444165	0.026962	AKT1/GADD45A/TNF/HMGB1	4
BP	GO:0006605	protein targeting	6/117	317/18800	0.0144078	0.0444165	0.026962	HRAS/BID/LAMP2/SH3GLB1/ATG13/PRKAA1	6
BP	GO:0042445	hormone metabolic process	5/117	230/18800	0.014548	0.0448018	0.0271959	CTSK/CTSL/CTSB/CTSZ/IGF1R	5
BP	GO:0051123	RNA polymerase II preinitiation complex assembly	2/117	30/18800	0.0149095	0.0457237	0.0277554	TP53/HMGB1	2
BP	GO:1902230	negative regulation of intrinsic apoptotic signaling pathway in response to DNA damage	2/117	30/18800	0.0149095	0.0457237	0.0277554	BID/BCL2L1	2
BP	GO:1903579	negative regulation of ATP metabolic process	2/117	30/18800	0.0149095	0.0457237	0.0277554	TP53/TNF	2
BP	GO:1990776	response to angiotensin	2/117	30/18800	0.0149095	0.0457237	0.0277554	RELA/IGF1R	2
BP	GO:0048041	focal adhesion assembly	3/117	83/18800	0.0150478	0.0459728	0.0279067	DAPK3/PTEN/TSC1	3
BP	GO:0048678	response to axon injury	3/117	83/18800	0.0150478	0.0459728	0.0279067	BAX/PTEN/IGF1R	3
BP	GO:0002274	myeloid leukocyte activation	5/117	232/18800	0.0150508	0.0459728	0.0279067	TNF/CTSC/PIK3CD/HMGB1/TRAF6	5
BP	GO:0050905	neuromuscular process	4/117	152/18800	0.0150533	0.0459728	0.0279067	TNF/ITPR1/RPS6KB1/PTEN	4
BP	GO:1901990	regulation of mitotic cell cycle phase transition	6/117	321/18800	0.0152384	0.0464897	0.0282204	AKT1/TP53/BID/PTEN/AMBRA1/RPTOR	6
BP	GO:0035051	cardiocyte differentiation	4/117	153/18800	0.015385	0.0468399	0.028433	MAPK1/LMNA/ATG5/TSC1	4
BP	GO:0048754	branching morphogenesis of an epithelial tube	4/117	153/18800	0.015385	0.0468399	0.028433	CTSH/TNF/KRAS/CTSZ	4
BP	GO:0031397	negative regulation of protein ubiquitination	3/117	84/18800	0.0155357	0.0472497	0.0286818	AKT1/SQSTM1/ATG5	3
BP	GO:0050770	regulation of axonogenesis	4/117	154/18800	0.0157213	0.0477649	0.0289945	STK11/PTEN/ULK1/ULK2	4
BP	GO:0001782	B cell homeostasis	2/117	31/18800	0.0158737	0.0479917	0.0291322	BAK1/BAX	2
BP	GO:0034694	response to prostaglandin	2/117	31/18800	0.0158737	0.0479917	0.0291322	AKT1/PRKAA1	2
BP	GO:0070633	transepithelial transport	2/117	31/18800	0.0158737	0.0479917	0.0291322	ACTB/ITPR1	2
BP	GO:1902042	negative regulation of extrinsic apoptotic signaling pathway via death domain receptors	2/117	31/18800	0.0158737	0.0479917	0.0291322	BCL2L1/RAF1	2
BP	GO:0050808	synapse organization	7/117	419/18800	0.0158776	0.0479917	0.0291322	ACTB/TNF/TUBA1A/DAB2IP/PTEN/TSC1/IGF1R	7
BP	GO:1905952	regulation of lipid localization	4/117	155/18800	0.0160622	0.0484613	0.0294173	AKT1/TNF/NFKBIA/IRS2	4
BP	GO:0034329	cell junction assembly	7/117	420/18800	0.0160659	0.0484613	0.0294173	ACTB/TNF/DAPK3/PTEN/PRKACA/TSC1/VMP1	7
BP	GO:0002703	regulation of leukocyte mediated immunity	5/117	236/18800	0.0160912	0.0484879	0.0294334	TNF/TRAF2/MAP3K7/HMGB1/TRAF6	5
BP	GO:0007009	plasma membrane organization	4/117	156/18800	0.0164077	0.0493406	0.029951	AKT1/PTEN/SH3GLB1/VMP1	4
BP	GO:1903169	regulation of calcium ion transmembrane transport	4/117	156/18800	0.0164077	0.0493406	0.029951	BAX/PRKACA/ATG5/VMP1	4
BP	GO:0006112	energy reserve metabolic process	3/117	86/18800	0.0165381	0.0496312	0.0301274	AKT1/IRS2/IRS1	3
BP	GO:1904705	regulation of vascular smooth muscle cell proliferation	3/117	86/18800	0.0165381	0.0496312	0.0301274	TNF/ERN1/PTEN	3
BP	GO:0098657	import into cell	5/117	238/18800	0.016629	0.049853	0.030262	AKT1/ACTB/TNF/RPS6KB1/IRS2	5
CC	GO:0000407	phagophore assembly site	12/117	33/19594	3.67729e-19	9.45064e-17	6.54171e-17	ATG12/PIK3C3/ATG2A/SQSTM1/ATG5/ATG13/ULK1/WIPI1/VMP1/ULK2/ATG2B/ATG7	12
CC	GO:0005776	autophagosome	15/117	112/19594	1.68121e-16	2.16035e-14	1.49539e-14	ATG12/LAMP2/PIK3C3/NRBF2/SNAP29/SH3GLB1/SQSTM1/STX17/ATG5/TP53INP2/AMBRA1/ULK1/MAP1LC3B/WIPI1/VMP1	15
CC	GO:0005741	mitochondrial outer membrane	15/117	205/19594	1.4561e-12	1.24739e-10	8.63439e-11	CASP8/BCL2A1/BAK1/PMAIP1/BAD/MCL1/KRAS/BID/BCL2L1/BAX/RAF1/RPS6KB1/SH3GLB1/AMBRA1/ULK1	15
CC	GO:0034045	phagophore assembly site membrane	7/117	17/19594	4.17786e-12	2.68428e-10	1.85805e-10	ATG12/ATG2A/ATG5/ULK1/WIPI1/ULK2/ATG2B	7
CC	GO:0031968	organelle outer membrane	15/117	232/19594	8.68093e-12	4.20476e-10	2.91052e-10	CASP8/BCL2A1/BAK1/PMAIP1/BAD/MCL1/KRAS/BID/BCL2L1/BAX/RAF1/RPS6KB1/SH3GLB1/AMBRA1/ULK1	15
CC	GO:0019867	outer membrane	15/117	234/19594	9.81656e-12	4.20476e-10	2.91052e-10	CASP8/BCL2A1/BAK1/PMAIP1/BAD/MCL1/KRAS/BID/BCL2L1/BAX/RAF1/RPS6KB1/SH3GLB1/AMBRA1/ULK1	15
CC	GO:0000421	autophagosome membrane	8/117	51/19594	6.52072e-10	2.39404e-08	1.65715e-08	LAMP2/SNAP29/SH3GLB1/STX17/ULK1/MAP1LC3B/WIPI1/VMP1	8
CC	GO:0061695	transferase complex, transferring phosphorus-containing groups	12/117	259/19594	4.94754e-08	1.45166e-06	1.00484e-06	PIK3R3/CHUK/PIK3CA/PIK3CD/ERN1/STK11/PIK3C3/IRS1/ATG13/ULK1/PRKAA1/IGF1R	12
CC	GO:0031904	endosome lumen	6/117	35/19594	5.61339e-08	1.45166e-06	1.00484e-06	CTSH/CTSK/CTSS/CTSL/PRF1/CTSB	6
CC	GO:1904813	ficolin-1-rich granule lumen	9/117	124/19594	5.64849e-08	1.45166e-06	1.00484e-06	CAPN1/CTSH/MAPK1/CTSS/CTSD/CTSB/CTSZ/HMGB1/ATG7	9
CC	GO:0098857	membrane microdomain	13/117	327/19594	8.01032e-08	1.8715e-06	1.29545e-06	MAPK1/CASP8/TNF/RIPK1/FAS/CTSD/TRAF2/CAPN2/TRADD/LAMP2/PRKACA/IRS1/IGF1R	13
CC	GO:0101002	ficolin-1-rich granule	10/117	185/19594	1.6436e-07	3.52005e-06	2.43657e-06	CAPN1/CTSH/MAPK1/CTSS/CTSD/CTSB/CTSZ/LAMP2/HMGB1/ATG7	10
CC	GO:1902911	protein kinase complex	8/117	115/19594	4.41181e-07	8.7218e-06	6.03721e-06	CHUK/ERN1/STK11/IRS1/ATG13/ULK1/PRKAA1/IGF1R	8
CC	GO:0005774	vacuolar membrane	14/117	449/19594	4.81752e-07	8.8436e-06	6.12152e-06	CTSD/RHEB/RRAGA/LAMP2/RRAGB/WDR41/SNAP29/SH3GLB1/STX17/ULK1/MAP1LC3B/RPTOR/WIPI1/VMP1	14
CC	GO:0045121	membrane raft	12/117	326/19594	5.91296e-07	1.01309e-05	7.01257e-06	MAPK1/CASP8/TNF/RIPK1/FAS/CTSD/TRAF2/CAPN2/TRADD/PRKACA/IRS1/IGF1R	12
CC	GO:0005775	vacuolar lumen	9/117	174/19594	1.01361e-06	1.6281e-05	1.12697e-05	MAPK1/CTSK/CTSS/CTSL/CTSC/CTSD/CTSB/CTSV/LAMP2	9
CC	GO:0043202	lysosomal lumen	7/117	97/19594	1.86212e-06	2.81508e-05	1.94859e-05	CTSK/CTSS/CTSL/CTSD/CTSB/CTSV/LAMP2	7
CC	GO:0019898	extrinsic component of membrane	11/117	314/19594	2.8842e-06	4.11799e-05	2.85046e-05	AKT1/PIK3R3/PIK3CA/KRAS/PIK3CD/PIK3C3/ATG2A/ATG13/ULK1/WIPI1/ATG2B	11
CC	GO:0036019	endolysosome	4/117	28/19594	2.21302e-05	0.000299341	0.000207203	CTSK/CTSS/CTSL/CTSB	4
CC	GO:0005942	phosphatidylinositol 3-kinase complex	4/117	29/19594	2.55531e-05	0.000328357	0.000227288	PIK3R3/PIK3CA/PIK3CD/PIK3C3	4
CC	GO:0035631	CD40 receptor complex	3/117	11/19594	3.30628e-05	0.000386234	0.00026735	CHUK/TRAF2/TRAF6	3
CC	GO:0044754	autolysosome	3/117	11/19594	3.30628e-05	0.000386234	0.00026735	LAMP2/PIK3C3/SQSTM1	3
CC	GO:0016605	PML body	6/117	105/19594	3.96338e-05	0.000442865	0.00030655	TP53/DAXX/DAPK3/PTEN/SQSTM1/TP53INP2	6
CC	GO:0030670	phagocytic vesicle membrane	5/117	77/19594	9.76886e-05	0.00104608	0.000724095	RAB8A/ATG12/LAMP2/PIK3C3/ATG5	5
CC	GO:0005767	secondary lysosome	3/117	17/19594	0.000132739	0.00129647	0.00089741	LAMP2/PIK3C3/SQSTM1	3
CC	GO:0005930	axoneme	6/117	131/19594	0.000135733	0.00129647	0.00089741	PIK3C3/PRKACA/ATG5/AMBRA1/MAP1LC3B/ATG7	6
CC	GO:0034774	secretory granule lumen	9/117	322/19594	0.000136452	0.00129647	0.00089741	CTSH/MAPK1/CTSW/CTSC/CTSD/SPTAN1/CTSZ/HMGB1/ATG7	9
CC	GO:0097014	ciliary plasm	6/117	132/19594	0.000141511	0.00129647	0.00089741	PIK3C3/PRKACA/ATG5/AMBRA1/MAP1LC3B/ATG7	6
CC	GO:0060205	cytoplasmic vesicle lumen	9/117	325/19594	0.000146294	0.00129647	0.00089741	CTSH/MAPK1/CTSW/CTSC/CTSD/SPTAN1/CTSZ/HMGB1/ATG7	9
CC	GO:0031983	vesicle lumen	9/117	327/19594	0.000153179	0.00131224	0.000908326	CTSH/MAPK1/CTSW/CTSC/CTSD/SPTAN1/CTSZ/HMGB1/ATG7	9
CC	GO:0031143	pseudopodium	3/117	18/19594	0.000158594	0.0013148	0.000910098	MAPK1/CAPN2/RAF1	3
CC	GO:0045335	phagocytic vesicle	6/117	138/19594	0.000180403	0.00144886	0.0010029	CTSS/RAB8A/ATG12/LAMP2/PIK3C3/ATG5	6
CC	GO:0042827	platelet dense granule	3/117	21/19594	0.000255137	0.00198697	0.00137538	CTSW/ITPR1/LAMP2	3
CC	GO:0005770	late endosome	8/117	283/19594	0.000300499	0.00227142	0.00157227	CTSH/MAPK1/CTSS/CTSL/RUBCN/LAMP2/PIK3C3/SQSTM1	8
CC	GO:1902554	serine/threonine protein kinase complex	5/117	99/19594	0.000318637	0.00232431	0.00160888	CHUK/ERN1/STK11/ATG13/ULK1	5
CC	GO:1904724	tertiary granule lumen	4/117	55/19594	0.000325584	0.00232431	0.00160888	CTSH/CTSS/CTSD/SPTAN1	4
CC	GO:0005637	nuclear inner membrane	4/117	61/19594	0.00048466	0.00336642	0.00233023	LMNB1/ITPR1/LMNB2/ERN1	4
CC	GO:0009898	cytoplasmic side of plasma membrane	6/117	169/19594	0.000534868	0.00361739	0.00250395	AKT1/CHUK/TRAF2/KRAS/PTEN/TRAF6	6
CC	GO:0005938	cell cortex	8/117	310/19594	0.00055022	0.00362581	0.00250978	ACTB/ITPR2/TRAF2/SPTAN1/CTSZ/CAPN2/TSC1/TRAF6	8
CC	GO:0030139	endocytic vesicle	8/117	342/19594	0.00104053	0.00668539	0.00462761	CTSS/CTSL/DAB2IP/RAB8A/ATG12/LAMP2/PIK3C3/ATG5	8
CC	GO:0098562	cytoplasmic side of membrane	6/117	193/19594	0.00106908	0.00670132	0.00463864	AKT1/CHUK/TRAF2/KRAS/PTEN/TRAF6	6
CC	GO:0005793	endoplasmic reticulum-Golgi intermediate compartment	5/117	131/19594	0.00113987	0.00697493	0.00482803	CTSC/CTSZ/STX17/HMGB1/VMP1	5
CC	GO:0033116	endoplasmic reticulum-Golgi intermediate compartment membrane	4/117	77/19594	0.00116805	0.00698115	0.00483233	CTSC/CTSZ/STX17/VMP1	4
CC	GO:0005652	nuclear lamina	2/117	10/19594	0.00154181	0.00880546	0.00609512	LMNB1/LMNA	2
CC	GO:0005952	cAMP-dependent protein kinase complex	2/117	10/19594	0.00154181	0.00880546	0.00609512	PRKACB/PRKACA	2
CC	GO:0044232	organelle membrane contact site	3/117	41/19594	0.00187481	0.0102641	0.00710478	ATG2A/STX17/ATG5	3
CC	GO:0031094	platelet dense tubular network	2/117	11/19594	0.00187709	0.0102641	0.00710478	ITPR2/ITPR1	2
CC	GO:0097546	ciliary base	3/117	42/19594	0.0020103	0.0107635	0.00745044	RAB8A/PRKACB/PRKACA	3
CC	GO:0032838	plasma membrane bounded cell projection cytoplasm	6/117	220/19594	0.00208026	0.0109108	0.0075524	PIK3C3/PRKACA/ATG5/AMBRA1/MAP1LC3B/ATG7	6
CC	GO:0005765	lysosomal membrane	8/117	404/19594	0.00294786	0.014783	0.0102327	CTSD/RHEB/RRAGA/LAMP2/RRAGB/WDR41/SNAP29/RPTOR	8
CC	GO:0098852	lytic vacuole membrane	8/117	404/19594	0.00294786	0.014783	0.0102327	CTSD/RHEB/RRAGA/LAMP2/RRAGB/WDR41/SNAP29/RPTOR	8
CC	GO:0005811	lipid droplet	4/117	100/19594	0.00304734	0.014783	0.0102327	ATG2A/TSC1/TRAF6/ATG2B	4
CC	GO:0070820	tertiary granule	5/117	164/19594	0.00304863	0.014783	0.0102327	CTSH/CTSS/CTSD/SPTAN1/LAMP2	5
CC	GO:0036464	cytoplasmic ribonucleoprotein granule	6/117	243/19594	0.00340571	0.0162086	0.0112196	CTSH/ACTB/EIF2S1/TUBA1A/SQSTM1/RPTOR	6
CC	GO:0099568	cytoplasmic region	6/117	259/19594	0.00464314	0.0216454	0.0149829	PIK3C3/PRKACA/ATG5/AMBRA1/MAP1LC3B/ATG7	6
CC	GO:0044853	plasma membrane raft	4/117	113/19594	0.00471651	0.0216454	0.0149829	MAPK1/PRKACA/IRS1/IGF1R	4
CC	GO:0035770	ribonucleoprotein granule	6/117	261/19594	0.00481838	0.021725	0.015038	CTSH/ACTB/EIF2S1/TUBA1A/SQSTM1/RPTOR	6
CC	GO:0035580	specific granule lumen	3/117	62/19594	0.00607476	0.0268178	0.0185632	CTSD/SPTAN1/CTSZ	3
CC	GO:0030666	endocytic vesicle membrane	5/117	194/19594	0.00619438	0.0268178	0.0185632	RAB8A/ATG12/LAMP2/PIK3C3/ATG5	5
CC	GO:0044233	Mitochondria-associated ER Membrane	2/117	20/19594	0.00626097	0.0268178	0.0185632	STX17/ATG5	2
CC	GO:0034399	nuclear periphery	4/117	127/19594	0.0071044	0.0299317	0.0207186	LMNB1/TP53/LMNA/ATF4	4
CC	GO:0031965	nuclear membrane	6/117	300/19594	0.00929566	0.038532	0.0266717	LMNB1/ITPR1/LMNA/LMNB2/BCL2L1/ERN1	6
CC	GO:0046930	pore complex	2/117	26/19594	0.0104629	0.0426819	0.0295443	BAK1/BAX	2
MF	GO:0004197	cysteine-type endopeptidase activity	15/117	120/18410	1.20058e-15	3.85387e-13	2.61601e-13	CAPN1/CTSH/CASP8/CTSK/CTSS/CTSL/CASP7/CTSW/CTSC/CTSD/CTSB/CTSV/CTSZ/CAPN2/CTSO	15
MF	GO:0008234	cysteine-type peptidase activity	15/117	178/18410	4.45693e-13	7.15337e-11	4.85571e-11	CAPN1/CTSH/CASP8/CTSK/CTSS/CTSL/CASP7/CTSW/CTSC/CTSD/CTSB/CTSV/CTSZ/CAPN2/CTSO	15
MF	GO:0004674	protein serine/threonine kinase activity	20/117	430/18410	3.18678e-12	3.40985e-10	2.31461e-10	AKT1/MAPK1/RIPK1/CHUK/MAPK8/PIK3CA/MAP3K14/ERN1/RAF1/RPS6KB1/PRKACB/DAPK3/STK11/MAP3K7/RPS6KB2/PRKACA/SQSTM1/ULK1/ULK2/PRKAA1	20
MF	GO:0106310	NA	18/117	360/18410	1.30848e-11	1.05005e-09	7.12775e-10	AKT1/MAPK1/RIPK1/MAPK8/PIK3CA/MAP3K14/ERN1/RAF1/RPS6KB1/PRKACB/DAPK3/STK11/MAP3K7/RPS6KB2/PRKACA/ULK1/ULK2/PRKAA1	18
MF	GO:0019902	phosphatase binding	14/117	193/18410	2.15682e-11	1.38468e-09	9.39921e-10	MAPK1/TP53/MAPK8/BAD/CTSC/TRAF2/DAB2IP/RPS6KB1/TSC2/IGBP1/STX17/IRS2/AMBRA1/MTMR4	14
MF	GO:0004712	protein serine/threonine/tyrosine kinase activity	19/117	446/18410	5.33308e-11	2.8532e-09	1.93675e-09	AKT1/MAPK1/RIPK1/MAPK8/PIK3CA/MAP3K14/ERN1/RAF1/RPS6KB1/PRKACB/DAPK3/STK11/MAP3K7/RPS6KB2/PRKACA/ULK1/ULK2/PRKAA1/IGF1R	19
MF	GO:0031625	ubiquitin protein ligase binding	15/117	298/18410	6.92563e-10	3.04155e-08	2.0646e-08	CASP8/TP53/DAXX/RIPK1/RELA/TRAF2/BID/NFKBIA/PRKACB/RRAGA/PRKACA/SQSTM1/AMBRA1/TRAF6/MAP1LC3B	15
MF	GO:0032813	tumor necrosis factor receptor superfamily binding	8/117	49/18410	7.58018e-10	3.04155e-08	2.0646e-08	CASP8/TNF/RIPK1/TRAF2/BID/DAB2IP/TRADD/TRAF6	8
MF	GO:0044389	ubiquitin-like protein ligase binding	15/117	317/18410	1.61885e-09	5.7739e-08	3.91932e-08	CASP8/TP53/DAXX/RIPK1/RELA/TRAF2/BID/NFKBIA/PRKACB/RRAGA/PRKACA/SQSTM1/AMBRA1/TRAF6/MAP1LC3B	15
MF	GO:0019903	protein phosphatase binding	11/117	148/18410	2.6078e-09	8.37103e-08	5.68225e-08	TP53/MAPK8/BAD/TRAF2/DAB2IP/RPS6KB1/IGBP1/STX17/IRS2/AMBRA1/MTMR4	11
MF	GO:0070513	death domain binding	5/117	11/18410	4.26275e-09	1.24395e-07	8.44391e-08	RIPK1/MCL1/BCL2L1/TRADD/BAX	5
MF	GO:0019003	GDP binding	8/117	73/18410	1.99078e-08	5.32534e-07	3.61484e-07	HRAS/KRAS/RHEB/RAB8A/RRAS/RRAGC/MRAS/RRAGD	8
MF	GO:0004175	endopeptidase activity	15/117	432/18410	1.00454e-07	2.48043e-06	1.68372e-06	CAPN1/CTSH/CASP8/CTSK/CTSS/CTSL/CASP7/CTSW/CTSC/CTSD/CTSB/CTSV/CTSZ/CAPN2/CTSO	15
MF	GO:0016303	1-phosphatidylinositol-3-kinase activity	4/117	10/18410	3.15913e-07	7.24344e-06	4.91684e-06	PIK3R3/PIK3CA/PIK3CD/PIK3C3	4
MF	GO:0035004	phosphatidylinositol 3-kinase activity	4/117	12/18410	7.37364e-07	1.57796e-05	1.07112e-05	PIK3R3/PIK3CA/PIK3CD/PIK3C3	4
MF	GO:0071889	14-3-3 protein binding	5/117	30/18410	1.19397e-06	2.3954e-05	1.626e-05	AKT1/BAD/DAB2IP/IRS2/RPTOR	5
MF	GO:0046982	protein heterodimerization activity	12/117	332/18410	1.36685e-06	2.52587e-05	1.71456e-05	GADD45A/TP53/BCL2A1/BAK1/CHUK/MCL1/ATF4/BCL2L1/BAX/RRAGA/RRAGC/RRAGD	12
MF	GO:0005164	tumor necrosis factor receptor binding	5/117	31/18410	1.41638e-06	2.52587e-05	1.71456e-05	CASP8/TNF/TRAF2/TRADD/TRAF6	5
MF	GO:0003924	GTPase activity	12/117	336/18410	1.5487e-06	2.61649e-05	1.77608e-05	HRAS/TUBA1A/KRAS/RHEB/RAB1A/RAB8A/RRAGA/RRAS/RRAGB/RRAGC/MRAS/RRAGD	12
MF	GO:0005525	GTP binding	12/117	379/18410	5.3498e-06	8.52717e-05	5.78824e-05	HRAS/TUBA1A/KRAS/RHEB/RAB1A/RAB8A/RRAGA/RRAS/RRAGB/RRAGC/MRAS/RRAGD	12
MF	GO:0052742	phosphatidylinositol kinase activity	4/117	19/18410	5.57852e-06	8.52717e-05	5.78824e-05	PIK3R3/PIK3CA/PIK3CD/PIK3C3	4
MF	GO:0005123	death receptor binding	4/117	21/18410	8.5297e-06	0.000124456	8.44807e-05	CASP8/RIPK1/BID/DAB2IP	4
MF	GO:0019001	guanyl nucleotide binding	12/117	401/18410	9.4603e-06	0.000126531	8.58896e-05	HRAS/TUBA1A/KRAS/RHEB/RAB1A/RAB8A/RRAGA/RRAS/RRAGB/RRAGC/MRAS/RRAGD	12
MF	GO:0032561	guanyl ribonucleotide binding	12/117	401/18410	9.4603e-06	0.000126531	8.58896e-05	HRAS/TUBA1A/KRAS/RHEB/RAB1A/RAB8A/RRAGA/RRAS/RRAGB/RRAGC/MRAS/RRAGD	12
MF	GO:0004709	MAP kinase kinase kinase activity	4/117	26/18410	2.07899e-05	0.000266942	0.0001812	RIPK1/MAP3K14/RAF1/MAP3K7	4
MF	GO:0004690	cyclic nucleotide-dependent protein kinase activity	3/117	10/18410	2.90596e-05	0.000358774	0.000243536	PRKACB/PRKACA/PRKAA1	3
MF	GO:0043548	phosphatidylinositol 3-kinase binding	4/117	29/18410	3.25464e-05	0.00038694	0.000262655	DAB2IP/IRS2/IRS1/IGF1R	4
MF	GO:0051721	protein phosphatase 2A binding	4/117	30/18410	3.73698e-05	0.000428418	0.00029081	TP53/DAB2IP/RPS6KB1/IGBP1	4
MF	GO:0047485	protein N-terminus binding	6/117	105/18410	5.58582e-05	0.000618292	0.000419697	GADD45A/TP53/DAXX/RELA/TSC1/TRAF6	6
MF	GO:0051087	chaperone binding	6/117	106/18410	5.89056e-05	0.00063029	0.000427841	TP53/BIRC5/BAK1/CTSC/BAX/TSC1	6
MF	GO:0043394	proteoglycan binding	4/117	36/18410	7.79963e-05	0.000807639	0.000548225	CTSK/CTSS/CTSL/CTSB	4
MF	GO:0004707	MAP kinase activity	3/117	15/18410	0.000107655	0.00107992	0.000733046	MAPK1/MAPK8/MAP3K7	3
MF	GO:0003925	NA	4/117	40/18410	0.000118663	0.0011249	0.000763581	HRAS/KRAS/RAB1A/MRAS	4
MF	GO:0051020	GTPase binding	9/117	298/18410	0.000121184	0.0011249	0.000763581	BIRC5/RAB8A/DAPK3/RRAGB/TSC2/RRAGC/RRAGD/AMBRA1/ULK1	9
MF	GO:0030971	receptor tyrosine kinase binding	5/117	76/18410	0.000122653	0.0011249	0.000763581	TP53/TRADD/MAP3K7/SQSTM1/IRS1	5
MF	GO:0030275	LRR domain binding	3/117	16/18410	0.000131885	0.0011664	0.000791752	ATF4/DAPK3/STK11	3
MF	GO:0031072	heat shock protein binding	6/117	123/18410	0.000134445	0.0011664	0.000791752	DAXX/BAK1/BAX/ERN1/TSC2/TSC1	6
MF	GO:0031435	mitogen-activated protein kinase kinase kinase binding	3/117	17/18410	0.000159405	0.00134655	0.00091404	TRAF2/DAB2IP/TRAF6	3
MF	GO:0032266	phosphatidylinositol-3-phosphate binding	4/117	44/18410	0.000172846	0.00142265	0.000965698	DAB2IP/ATG2A/WIPI1/ATG2B	4
MF	GO:0004438	phosphatidylinositol-3-phosphatase activity	3/117	18/18410	0.000190401	0.00152797	0.00103718	PTEN/MTMR14/MTMR4	3
MF	GO:0052744	phosphatidylinositol monophosphate phosphatase activity	3/117	19/18410	0.000225055	0.00176202	0.00119606	PTEN/MTMR14/MTMR4	3
MF	GO:0016505	peptidase activator activity involved in apoptotic process	3/117	20/18410	0.000263546	0.00201424	0.00136727	CTSH/BAD/CTSC	3
MF	GO:0140296	NA	4/117	52/18410	0.000331484	0.00247456	0.00167973	TP53/RELA/ATF4/RPTOR	4
MF	GO:0005126	cytokine receptor binding	8/117	272/18410	0.000348363	0.00249127	0.00169107	CASP8/TNF/RIPK1/TRAF2/BID/DAB2IP/TRADD/TRAF6	8
MF	GO:0005158	insulin receptor binding	3/117	22/18410	0.000352734	0.00249127	0.00169107	IRS2/IRS1/IGF1R	3
MF	GO:0035091	phosphatidylinositol binding	8/117	273/18410	0.000357004	0.00249127	0.00169107	AKT1/ITPR2/ITPR1/DAB2IP/RUBCN/ATG2A/WIPI1/ATG2B	8
MF	GO:0061629	RNA polymerase II sequence-specific DNA-binding transcription factor binding	9/117	348/18410	0.000382706	0.0026138	0.00177425	ACTB/FOS/TP53/DAXX/RELA/ATF4/NFKBIA/HMGB1/WIPI1	9
MF	GO:0030295	protein kinase activator activity	5/117	104/18410	0.000530205	0.00354575	0.00240685	DAXX/PIK3CA/DAB2IP/STK11/RPTOR	5
MF	GO:0000287	magnesium ion binding	7/117	222/18410	0.000544648	0.003568	0.00242196	ERN1/RHEB/PRKACB/STK11/MAP3K7/RRAGC/PRKACA	7
MF	GO:0034593	phosphatidylinositol bisphosphate phosphatase activity	3/117	26/18410	0.000584598	0.00375312	0.00254762	PTEN/MTMR14/MTMR4	3
MF	GO:0019209	kinase activator activity	5/117	110/18410	0.000684673	0.00430941	0.00292523	DAXX/PIK3CA/DAB2IP/STK11/RPTOR	5
MF	GO:0030674	protein binding, bridging	8/117	305/18410	0.000740867	0.00457343	0.00310444	TRAF2/DAB2IP/TRADD/SNAP29/STX17/IRS1/AMBRA1/RPTOR	8
MF	GO:1990782	protein tyrosine kinase binding	5/117	113/18410	0.000773467	0.00468459	0.0031799	TP53/TRADD/MAP3K7/SQSTM1/IRS1	5
MF	GO:0005543	phospholipid binding	10/117	467/18410	0.000794754	0.00472437	0.0032069	AKT1/ITPR2/ITPR1/BAD/DAB2IP/RUBCN/ATG2A/HMGB1/WIPI1/ATG2B	10
MF	GO:0140297	NA	10/117	470/18410	0.000834497	0.00487043	0.00330604	ACTB/FOS/TP53/DAXX/RELA/ATF4/NFKBIA/DAPK3/HMGB1/WIPI1	10
MF	GO:0097110	scaffold protein binding	4/117	67/18410	0.000872282	0.00499167	0.00338835	CASP8/ITPR2/CHUK/MAP3K7	4
MF	GO:1901981	phosphatidylinositol phosphate binding	6/117	175/18410	0.000886372	0.00499167	0.00338835	AKT1/DAB2IP/RUBCN/ATG2A/WIPI1/ATG2B	6
MF	GO:0005518	collagen binding	4/117	68/18410	0.000922296	0.00510443	0.00346489	CTSK/CTSS/CTSL/CTSB	4
MF	GO:0001968	fibronectin binding	3/117	31/18410	0.000987581	0.00537311	0.00364727	CTSK/CTSS/CTSL	3
MF	GO:0052866	phosphatidylinositol phosphate phosphatase activity	3/117	34/18410	0.00129663	0.00693698	0.00470882	PTEN/MTMR14/MTMR4	3
MF	GO:0043560	insulin receptor substrate binding	2/117	10/18410	0.001743	0.00902422	0.00612564	PIK3CA/IGF1R	2
MF	GO:0052813	phosphatidylinositol bisphosphate kinase activity	2/117	10/18410	0.001743	0.00902422	0.00612564	PIK3CA/PIK3CD	2
MF	GO:0043028	cysteine-type endopeptidase regulator activity involved in apoptotic process	3/117	40/18410	0.00208239	0.0101642	0.00689943	CTSH/BIRC5/BAD	3
MF	GO:0031996	thioesterase binding	2/117	11/18410	0.00212149	0.0101642	0.00689943	TRAF2/TRAF6	2
MF	GO:0043422	protein kinase B binding	2/117	11/18410	0.00212149	0.0101642	0.00689943	BAD/TRAF6	2
MF	GO:0043522	leucine zipper domain binding	2/117	11/18410	0.00212149	0.0101642	0.00689943	ATF4/DAPK3	2
MF	GO:0052629	phosphatidylinositol-3,5-bisphosphate 3-phosphatase activity	2/117	11/18410	0.00212149	0.0101642	0.00689943	MTMR14/MTMR4	2
MF	GO:0051219	phosphoprotein binding	4/117	88/18410	0.00239618	0.0111532	0.00757081	MAPK1/PIK3R3/RRAGA/IRS1	4
MF	GO:0001046	core promoter sequence-specific DNA binding	3/117	42/18410	0.00239742	0.0111532	0.00757081	FOS/TP53/RELA	3
MF	GO:0016504	peptidase activator activity	3/117	43/18410	0.00256539	0.0115984	0.00787302	CTSH/BAD/CTSC	3
MF	GO:0051879	Hsp90 protein binding	3/117	43/18410	0.00256539	0.0115984	0.00787302	ERN1/TSC2/TSC1	3
MF	GO:0001784	phosphotyrosine residue binding	3/117	44/18410	0.00274045	0.0120505	0.00817986	MAPK1/PIK3R3/IRS1	3
MF	GO:0030544	Hsp70 protein binding	3/117	44/18410	0.00274045	0.0120505	0.00817986	BAX/ERN1/TSC1	3
MF	GO:0060090	molecular adaptor activity	8/117	379/18410	0.00291357	0.0126386	0.00857908	TRAF2/DAB2IP/TRADD/SNAP29/STX17/IRS1/AMBRA1/RPTOR	8
MF	GO:0070679	inositol 1,4,5 trisphosphate binding	2/117	13/18410	0.00298377	0.0127705	0.00866862	ITPR2/ITPR1	2
MF	GO:0005068	transmembrane receptor protein tyrosine kinase adaptor activity	2/117	14/18410	0.00346664	0.0144518	0.0098099	TRADD/IRS1	2
MF	GO:0106018	phosphatidylinositol-3,5-bisphosphate phosphatase activity	2/117	14/18410	0.00346664	0.0144518	0.0098099	MTMR14/MTMR4	2
MF	GO:0019207	kinase regulator activity	6/117	235/18410	0.00391217	0.0161001	0.0109287	PIK3R3/DAXX/PIK3CA/DAB2IP/STK11/RPTOR	6
MF	GO:0097153	cysteine-type endopeptidase activity involved in apoptotic process	2/117	15/18410	0.00398341	0.0161857	0.0109869	CASP8/CASP7	2
MF	GO:0004198	calcium-dependent cysteine-type endopeptidase activity	2/117	16/18410	0.00453362	0.0179666	0.0121957	CAPN1/CAPN2	2
MF	GO:0016307	phosphatidylinositol phosphate kinase activity	2/117	16/18410	0.00453362	0.0179666	0.0121957	PIK3CA/PIK3CD	2
MF	GO:0004252	serine-type endopeptidase activity	5/117	174/18410	0.00509306	0.01949	0.0132298	CTSH/CTSK/CTSS/CTSC/CTSV	5
MF	GO:0008656	cysteine-type endopeptidase activator activity involved in apoptotic process	2/117	17/18410	0.00511685	0.01949	0.0132298	CTSH/BAD	2
MF	GO:0015278	calcium-release channel activity	2/117	17/18410	0.00511685	0.01949	0.0132298	ITPR2/ITPR1	2
MF	GO:0045309	protein phosphorylated amino acid binding	3/117	55/18410	0.0051609	0.01949	0.0132298	MAPK1/PIK3R3/IRS1	3
MF	GO:0140678	NA	3/117	59/18410	0.00627886	0.0234362	0.0159085	ITPR1/DAXX/TSC1	3
MF	GO:0000979	RNA polymerase II core promoter sequence-specific DNA binding	2/117	20/18410	0.00706029	0.02605	0.0176827	FOS/RELA	2
MF	GO:1990841	promoter-specific chromatin binding	3/117	62/18410	0.00720492	0.0262816	0.0178399	GADD45A/TP53/ATF4	3
MF	GO:0008236	serine-type peptidase activity	5/117	191/18410	0.00749714	0.0270402	0.0183549	CTSH/CTSK/CTSS/CTSC/CTSV	5
MF	GO:0017171	serine hydrolase activity	5/117	195/18410	0.0081609	0.0291072	0.019758	CTSH/CTSK/CTSS/CTSC/CTSV	5
MF	GO:0042826	histone deacetylase binding	4/117	126/18410	0.0085587	0.0298648	0.0202722	TP53/MAPK8/RELA/TRAF6	4
MF	GO:0002039	p53 binding	3/117	66/18410	0.00855939	0.0298648	0.0202722	TP53/DAXX/STK11	3
MF	GO:0019887	protein kinase regulator activity	5/117	207/18410	0.0103955	0.0358811	0.0243561	DAXX/PIK3CA/DAB2IP/STK11/RPTOR	5
MF	GO:0099604	ligand-gated calcium channel activity	2/117	26/18410	0.0117811	0.0402312	0.0273089	ITPR2/ITPR1	2
MF	GO:0004190	aspartic-type endopeptidase activity	2/117	27/18410	0.0126712	0.0423694	0.0287603	CASP7/CTSD	2
MF	GO:0050681	androgen receptor binding	2/117	27/18410	0.0126712	0.0423694	0.0287603	DAXX/WIPI1	2
MF	GO:0070001	aspartic-type peptidase activity	2/117	28/18410	0.0135898	0.0449724	0.0305272	CASP7/CTSD	2
MF	GO:0046625	sphingolipid binding	2/117	29/18410	0.0145364	0.0476142	0.0323205	TRAF2/MAP1LC3B	2
MF	GO:0035591	signaling adaptor activity	3/117	81/18410	0.0149031	0.0483221	0.0328011	DAB2IP/TRADD/IRS1	3
MF	GO:0005217	intracellular ligand-gated ion channel activity	2/117	30/18410	0.0155107	0.0497894	0.033797	ITPR2/ITPR1	2

## Sheet: kegg pathways
ID	Description	GeneRatio	BgRatio	pvalue	p.adjust	qvalue	geneID	Count
chx04140	Autophagy - animal	73/122	145/8892	2.28037e-106	4.74317e-104	7.68124e-105	AKT1/MAPK1/PIK3R3/CTSL/EIF2S1/ITPR1/MAPK8/BAD/CTSD/HRAS/PIK3CA/KRAS/CTSB/CTSV/BCL2L1/PIK3CD/ERN1/RAF1/RPS6KB1/RHEB/RAB1A/RAB8A/RUBCN/PRKACB/DAPK3/STK11/ATG10/RRAGA/MAP3K7/ATG12/RRAS/PTEN/LAMP2/RRAGB/WDR41/MTMR14/PIK3C3/TSC2/RRAGC/NRBF2/RPS6KB2/ATG2A/IGBP1/SNAP29/SH3GLB1/MRAS/PRKACA/SQSTM1/STX17/ATG5/RRAGD/TSC1/IRS2/HMGB1/TP53INP2/IRS1/LOC102169319/ATG13/AMBRA1/TRAF6/LOC108637886/ULK1/MAP1LC3B/AKT…	73
chx04210	Apoptosis	67/122	150/8892	6.19367e-92	6.44142e-90	1.04314e-90	CAPN1/AKT1/CTSH/MAPK1/ACTB/CASP8/CTSK/CTSS/GADD45A/PIK3R3/ITPR2/LMNB1/CTSL/EIF2S1/FOS/TP53/BIRC5/BCL2A1/TNF/CASP7/PRF1/CTSW/LOC102176598/ITPR1/DAXX/RIPK1/BAK1/PMAIP1/FAS/CHUK/MAPK8/BAD/CTSC/CTSD/RELA/HRAS/TRAF2/IL3RA/MCL1/LMNA/LOC102173997/PIK3CA/TUBA1A/KRAS/BID/ATF4/LMNB2/GADD45B/CTSB/CTSV/GADD45G/DAB2IP/SPTAN1/PARP4/CTSZ/BCL2L1/CAPN2/PIK3CD/CTSO/TRADD/BBC3/BAX/MAP3K14/ERN1/NFKBIA/LOC102168343/R…	67
chx04211	Longevity regulating pathway	28/122	89/8892	1.44298e-31	1.00047e-29	1.62019e-30	AKT1/PIK3R3/TP53/RELA/HRAS/PIK3CA/KRAS/ATF4/PIK3CD/BAX/RPS6KB1/RHEB/PRKACB/STK11/TSC2/RPS6KB2/PRKACA/ATG5/TSC1/IRS2/IRS1/LOC102169319/ATG13/ULK1/AKT1S1/RPTOR/PRKAA1/IGF1R	28
chx05210	Colorectal cancer	24/122	89/8892	2.91319e-25	1.51486e-23	2.45321e-24	AKT1/MAPK1/GADD45A/PIK3R3/FOS/TP53/BIRC5/BAK1/PMAIP1/MAPK8/BAD/HRAS/LOC102173997/PIK3CA/KRAS/GADD45B/GADD45G/PIK3CD/BBC3/BAX/RAF1/RPS6KB1/RPS6KB2/LOC102169319	24
chx04150	mTOR signaling pathway	29/122	159/8892	3.65596e-25	1.52088e-23	2.46297e-24	AKT1/MAPK1/PIK3R3/TNF/CHUK/HRAS/PIK3CA/KRAS/PIK3CD/RAF1/RPS6KB1/RHEB/STK11/RRAGA/PTEN/RRAGB/TSC2/RRAGC/RPS6KB2/RRAGD/TSC1/IRS1/LOC102169319/ULK1/AKT1S1/RPTOR/ULK2/PRKAA1/IGF1R	29
chx05163	Human cytomegalovirus infection	33/122	242/8892	2.09386e-24	7.25873e-23	1.1755e-23	AKT1/MAPK1/CASP8/PIK3R3/ITPR2/TP53/TNF/ITPR1/RIPK1/BAK1/FAS/CHUK/RELA/HRAS/TRAF2/LOC102173997/PIK3CA/KRAS/BID/ATF4/PIK3CD/TRADD/BAX/NFKBIA/RAF1/RPS6KB1/RHEB/PRKACB/TSC2/RPS6KB2/PRKACA/TSC1/LOC102169319	33
chx05170	Human immunodeficiency virus 1 infection	32/122	231/8892	7.11382e-24	2.11382e-22	3.42319e-23	AKT1/MAPK1/CASP8/PIK3R3/ITPR2/FOS/TNF/ITPR1/RIPK1/BAK1/FAS/CHUK/MAPK8/BAD/RELA/HRAS/TRAF2/LOC102173997/PIK3CA/KRAS/BID/BCL2L1/PIK3CD/TRADD/BAX/NFKBIA/RAF1/RPS6KB1/MAP3K7/RPS6KB2/LOC102169319/TRAF6	32
chx05010	Alzheimer disease	38/122	387/8892	6.48115e-23	1.6851e-21	2.7289e-22	CAPN1/AKT1/MAPK1/CASP8/PIK3R3/ITPR2/EIF2S1/TNF/CASP7/ITPR1/FAS/CHUK/MAPK8/BAD/RELA/HRAS/TRAF2/LOC102173997/PIK3CA/TUBA1A/KRAS/BID/ATF4/CAPN2/PIK3CD/ERN1/RAF1/PIK3C3/NRBF2/ATG2A/IRS2/IRS1/ATG13/AMBRA1/ULK1/WIPI1/ULK2/ATG2B	38
chx05212	Pancreatic cancer	21/122	78/8892	3.70051e-22	8.5523e-21	1.38499e-21	AKT1/MAPK1/GADD45A/PIK3R3/TP53/BAK1/CHUK/MAPK8/BAD/RELA/PIK3CA/KRAS/GADD45B/GADD45G/BCL2L1/PIK3CD/BAX/RAF1/RPS6KB1/RPS6KB2/LOC102169319	21
chx05022	Pathways of neurodegeneration - multiple diseases	40/122	476/8892	1.2493e-21	2.59854e-20	4.20816e-21	CAPN1/MAPK1/CASP8/ITPR2/EIF2S1/TNF/CASP7/ITPR1/DAXX/BAK1/FAS/MAPK8/BAD/RELA/HRAS/TRAF2/LOC102173997/TUBA1A/KRAS/BID/ATF4/BCL2L1/CAPN2/BAX/ERN1/RAF1/RAB1A/RAB8A/WDR41/PIK3C3/NRBF2/ATG2A/SQSTM1/ATG13/AMBRA1/ULK1/MAP1LC3B/WIPI1/ULK2/ATG2B	40
chx05160	Hepatitis C	26/122	160/8892	3.12307e-21	5.90545e-20	9.56348e-21	AKT1/MAPK1/CASP8/PIK3R3/EIF2S1/TP53/TNF/RIPK1/BAK1/FAS/CHUK/BAD/RELA/HRAS/TRAF2/LOC102173997/PIK3CA/KRAS/BID/PIK3CD/TRADD/BAX/NFKBIA/RAF1/TRAF6/LOC108637886	26
chx05417	Lipid and atherosclerosis	29/122	228/8892	1.46639e-20	2.54174e-19	4.11619e-20	AKT1/MAPK1/CASP8/PIK3R3/EIF2S1/FOS/TP53/TNF/CASP7/ITPR1/FAS/CHUK/MAPK8/BAD/RELA/HRAS/TRAF2/LOC102173997/PIK3CA/KRAS/BID/ATF4/BCL2L1/PIK3CD/BAX/ERN1/NFKBIA/MAP3K7/TRAF6	29
chx04213	Longevity regulating pathway - multiple species	18/122	62/8892	9.13039e-20	1.46086e-18	2.36577e-19	AKT1/PIK3R3/HRAS/PIK3CA/KRAS/PIK3CD/RPS6KB1/PRKACB/RPS6KB2/PRKACA/ATG5/IRS2/IRS1/LOC102169319/AKT1S1/RPTOR/PRKAA1/IGF1R	18
chx05161	Hepatitis B	25/122	166/8892	1.36383e-19	2.02626e-18	3.2814e-19	AKT1/MAPK1/CASP8/PIK3R3/FOS/TP53/BIRC5/TNF/FAS/CHUK/MAPK8/BAD/RELA/HRAS/LOC102173997/PIK3CA/KRAS/BID/ATF4/PIK3CD/BAX/NFKBIA/RAF1/MAP3K7/TRAF6	25
chx05220	Chronic myeloid leukemia	19/122	78/8892	3.29794e-19	4.57315e-18	7.40591e-19	AKT1/MAPK1/GADD45A/PIK3R3/TP53/BAK1/CHUK/BAD/RELA/HRAS/PIK3CA/KRAS/GADD45B/GADD45G/BCL2L1/PIK3CD/BAX/NFKBIA/RAF1	19
chx05162	Measles	23/122	143/8892	9.87388e-19	1.2836e-17	2.07871e-18	AKT1/CASP8/PIK3R3/EIF2S1/FOS/TP53/BAK1/FAS/CHUK/MAPK8/BAD/RELA/LOC102173997/PIK3CA/BID/BCL2L1/PIK3CD/TRADD/BBC3/BAX/NFKBIA/MAP3K7/TRAF6	23
chx04218	Cellular senescence	24/122	166/8892	2.12216e-18	2.59653e-17	4.2049e-18	CAPN1/AKT1/MAPK1/GADD45A/PIK3R3/ITPR2/TP53/ITPR1/RELA/HRAS/PIK3CA/KRAS/GADD45B/GADD45G/CAPN2/PIK3CD/RAF1/RHEB/RRAS/PTEN/TSC2/MRAS/SQSTM1/TSC1	24
chx05167	Kaposi sarcoma-associated herpesvirus infection	26/122	208/8892	2.88633e-18	3.33532e-17	5.40132e-18	AKT1/MAPK1/CASP8/PIK3R3/ITPR2/FOS/TP53/ITPR1/BAK1/FAS/CHUK/MAPK8/RELA/HRAS/TRAF2/LOC102173997/PIK3CA/KRAS/BID/PIK3CD/TRADD/BAX/NFKBIA/RAF1/PIK3C3/MAP1LC3B	26
chx04668	TNF signaling pathway	21/122	119/8892	4.98875e-18	5.46137e-17	8.84432e-18	AKT1/MAPK1/CASP8/PIK3R3/FOS/TNF/CASP7/RIPK1/FAS/CHUK/MAPK8/RELA/TRAF2/PIK3CA/ATF4/DAB2IP/PIK3CD/TRADD/MAP3K14/NFKBIA/MAP3K7	21
chx04910	Insulin signaling pathway	22/122	139/8892	8.66059e-18	9.00701e-17	1.45862e-17	AKT1/MAPK1/PIK3R3/MAPK8/BAD/HRAS/PIK3CA/KRAS/PIK3CD/RAF1/RPS6KB1/RHEB/PRKACB/TSC2/RPS6KB2/PRKACA/TSC1/IRS2/IRS1/LOC102169319/RPTOR/PRKAA1	22
chx04152	AMPK signaling pathway	21/122	125/8892	1.44348e-17	1.42973e-16	2.31535e-17	AKT1/PIK3R3/PIK3CA/PIK3CD/RPS6KB1/RHEB/RAB8A/STK11/MAP3K7/TSC2/RPS6KB2/TSC1/IRS2/IRS1/LOC102169319/LOC108637886/ULK1/AKT1S1/RPTOR/PRKAA1/IGF1R	21
chx01522	Endocrine resistance	19/122	96/8892	2.25716e-17	2.13404e-16	3.45593e-17	AKT1/MAPK1/PIK3R3/FOS/TP53/MAPK8/BAD/HRAS/PIK3CA/KRAS/PIK3CD/BAX/RAF1/RPS6KB1/PRKACB/RPS6KB2/PRKACA/LOC102169319/IGF1R	19
chx05213	Endometrial cancer	16/122	58/8892	2.84141e-17	2.56962e-16	4.16133e-17	AKT1/MAPK1/GADD45A/PIK3R3/TP53/BAK1/BAD/HRAS/PIK3CA/KRAS/GADD45B/GADD45G/PIK3CD/BAX/RAF1/PTEN	16
chx05218	Melanoma	17/122	72/8892	4.98355e-17	4.31908e-16	6.99446e-17	AKT1/MAPK1/GADD45A/PIK3R3/TP53/BAK1/BAD/HRAS/PIK3CA/KRAS/GADD45B/GADD45G/PIK3CD/BAX/RAF1/PTEN/IGF1R	17
chx05169	Epstein-Barr virus infection	25/122	214/8892	7.27287e-17	6.02477e-16	9.75672e-17	AKT1/CASP8/GADD45A/PIK3R3/TP53/TNF/RIPK1/BAK1/FAS/CHUK/MAPK8/RELA/TRAF2/LOC102173997/PIK3CA/BID/GADD45B/GADD45G/PIK3CD/TRADD/BAX/MAP3K14/NFKBIA/MAP3K7/TRAF6	25
chx04625	C-type lectin receptor signaling pathway	19/122	102/8892	7.53096e-17	6.02477e-16	9.75672e-17	AKT1/MAPK1/CASP8/PIK3R3/ITPR2/TNF/ITPR1/CHUK/MAPK8/RELA/HRAS/PIK3CA/KRAS/PIK3CD/MAP3K14/NFKBIA/RAF1/RRAS/MRAS	19
chx04136	Autophagy - other	13/122	34/8892	2.31614e-16	1.78428e-15	2.88953e-16	ATG10/ATG12/PIK3C3/ATG2A/IGBP1/ATG5/ATG13/LOC108637886/RPTOR/WIPI1/ULK2/ATG2B/ATG7	13
chx01524	Platinum drug resistance	17/122	80/8892	3.4081e-16	2.53173e-15	4.09997e-16	AKT1/MAPK1/CASP8/PIK3R3/TP53/BIRC5/BAK1/PMAIP1/FAS/BAD/LOC102173997/PIK3CA/BID/BCL2L1/PIK3CD/BBC3/BAX	17
chx05222	Small cell lung cancer	18/122	96/8892	4.61254e-16	3.2319e-15	5.23385e-16	AKT1/GADD45A/PIK3R3/TP53/BAK1/CHUK/RELA/TRAF2/LOC102173997/PIK3CA/GADD45B/GADD45G/BCL2L1/PIK3CD/BAX/NFKBIA/PTEN/TRAF6	18
chx04068	FoxO signaling pathway	20/122	129/8892	4.6614e-16	3.2319e-15	5.23385e-16	AKT1/MAPK1/GADD45A/PIK3R3/CHUK/MAPK8/HRAS/PIK3CA/KRAS/GADD45B/GADD45G/PIK3CD/RAF1/STK11/ATG12/PTEN/IRS2/IRS1/PRKAA1/IGF1R	20
chx05205	Proteoglycans in cancer	24/122	210/8892	5.44533e-16	3.65364e-15	5.91682e-16	AKT1/MAPK1/ACTB/PIK3R3/ITPR2/CTSL/TP53/TNF/ITPR1/FAS/HRAS/PIK3CA/KRAS/CTSV/PIK3CD/RAF1/RPS6KB1/PRKACB/RRAS/RPS6KB2/MRAS/PRKACA/LOC102169319/IGF1R	24
chx05132	Salmonella infection	26/122	260/8892	7.67784e-16	4.9906e-15	8.08194e-16	AKT1/MAPK1/ACTB/CASP8/FOS/TNF/CASP7/RIPK1/BAK1/CHUK/MAPK8/RELA/HRAS/TRAF2/LOC102173997/PIK3CA/TUBA1A/PIK3CD/TRADD/BAX/NFKBIA/RAF1/MAP3K7/RRAS/PIK3C3/TRAF6	26
chx05225	Hepatocellular carcinoma	22/122	175/8892	1.35014e-15	8.50997e-15	1.37813e-15	AKT1/MAPK1/ACTB/GADD45A/PIK3R3/TP53/BAK1/BAD/HRAS/PIK3CA/KRAS/GADD45B/GADD45G/BCL2L1/PIK3CD/BAX/RAF1/RPS6KB1/PTEN/RPS6KB2/LOC102169319/IGF1R	22
chx04010	MAPK signaling pathway	27/122	294/8892	1.69143e-15	1.03476e-14	1.67572e-15	AKT1/MAPK1/GADD45A/FOS/TP53/TNF/DAXX/FAS/CHUK/MAPK8/RELA/HRAS/TRAF2/KRAS/ATF4/GADD45B/GADD45G/TRADD/MAP3K14/RAF1/PRKACB/MAP3K7/RRAS/MRAS/PRKACA/TRAF6/IGF1R	27
chx04932	Non-alcoholic fatty liver disease	21/122	157/8892	1.77805e-15	1.03645e-14	1.67846e-15	AKT1/CASP8/PIK3R3/EIF2S1/FOS/TNF/CASP7/FAS/MAPK8/RELA/TRAF2/LOC102173997/PIK3CA/BID/ATF4/PIK3CD/BAX/ERN1/IRS2/IRS1/PRKAA1	21
chx04071	Sphingolipid signaling pathway	19/122	120/8892	1.79386e-15	1.03645e-14	1.67846e-15	AKT1/MAPK1/PIK3R3/TP53/TNF/MAPK8/CTSD/RELA/HRAS/TRAF2/PIK3CA/KRAS/BID/PIK3CD/TRADD/BAX/RAF1/PTEN/LOC108637886	19
chx05235	PD-L1 expression and PD-1 checkpoint pathway in cancer	17/122	88/8892	1.88121e-15	1.05755e-14	1.71262e-15	AKT1/MAPK1/PIK3R3/FOS/CHUK/RELA/HRAS/PIK3CA/KRAS/PIK3CD/NFKBIA/RAF1/RPS6KB1/PTEN/RPS6KB2/LOC102169319/TRAF6	17
chx05214	Glioma	16/122	74/8892	1.99351e-15	1.09118e-14	1.7671e-15	AKT1/MAPK1/GADD45A/PIK3R3/TP53/BAK1/HRAS/PIK3CA/KRAS/GADD45B/GADD45G/PIK3CD/BAX/RAF1/PTEN/IGF1R	16
chx01521	EGFR tyrosine kinase inhibitor resistance	16/122	80/8892	7.46412e-15	3.89986e-14	6.31556e-15	AKT1/MAPK1/PIK3R3/BAD/HRAS/PIK3CA/KRAS/BCL2L1/PIK3CD/BAX/RAF1/RPS6KB1/PTEN/RPS6KB2/LOC102169319/IGF1R	16
chx04151	PI3K-Akt signaling pathway	29/122	368/8892	7.49972e-15	3.89986e-14	6.31556e-15	AKT1/MAPK1/PIK3R3/TP53/CHUK/BAD/RELA/HRAS/IL3RA/MCL1/PIK3CA/KRAS/ATF4/BCL2L1/PIK3CD/RAF1/RPS6KB1/RHEB/STK11/PTEN/TSC2/RPS6KB2/TSC1/IRS1/LOC102169319/LOC108637886/RPTOR/PRKAA1/IGF1R	29
chx05224	Breast cancer	20/122	150/8892	9.46463e-15	4.80157e-14	7.77582e-15	AKT1/MAPK1/GADD45A/PIK3R3/FOS/TP53/BAK1/HRAS/PIK3CA/KRAS/GADD45B/GADD45G/PIK3CD/BAX/RAF1/RPS6KB1/PTEN/RPS6KB2/LOC102169319/IGF1R	20
chx05221	Acute myeloid leukemia	15/122	68/8892	1.15091e-14	5.69973e-14	9.23034e-15	AKT1/MAPK1/PIK3R3/BCL2A1/CHUK/BAD/RELA/HRAS/PIK3CA/KRAS/PIK3CD/RAF1/RPS6KB1/RPS6KB2/LOC102169319	15
chx05165	Human papillomavirus infection	28/122	356/8892	2.50092e-14	1.20975e-13	1.95911e-14	AKT1/MAPK1/CASP8/PIK3R3/TP53/TNF/BAK1/FAS/CHUK/BAD/RELA/HRAS/PIK3CA/KRAS/PIK3CD/TRADD/BAX/RAF1/RPS6KB1/RHEB/PRKACB/PTEN/TSC2/RPS6KB2/PRKACA/TSC1/LOC102169319/LOC108637886	28
chx05223	Non-small cell lung cancer	15/122	72/8892	2.86386e-14	1.35383e-13	2.19243e-14	AKT1/MAPK1/GADD45A/PIK3R3/TP53/BAK1/BAD/HRAS/PIK3CA/KRAS/GADD45B/GADD45G/PIK3CD/BAX/RAF1	15
chx05017	Spinocerebellar ataxia	19/122	144/8892	5.69714e-14	2.63334e-13	4.26452e-14	AKT1/PIK3R3/ITPR2/ITPR1/MAPK8/TRAF2/LOC102173997/PIK3CA/PIK3CD/ERN1/PIK3C3/NRBF2/ATG2A/ATG13/AMBRA1/ULK1/WIPI1/ULK2/ATG2B	19
chx05014	Amyotrophic lateral sclerosis	28/122	372/8892	7.58096e-14	3.42791e-13	5.55128e-14	ACTB/EIF2S1/TP53/TNF/DAXX/BAD/TRAF2/LOC102173997/TUBA1A/BID/ATF4/BCL2L1/BAX/ERN1/RAB1A/RAB8A/WDR41/PIK3C3/NRBF2/ATG2A/SQSTM1/ATG13/AMBRA1/ULK1/MAP1LC3B/WIPI1/ULK2/ATG2B	28
chx05215	Prostate cancer	16/122	97/8892	1.8103e-13	8.01153e-13	1.29741e-13	AKT1/MAPK1/PIK3R3/TP53/CHUK/BAD/RELA/HRAS/PIK3CA/KRAS/ATF4/PIK3CD/NFKBIA/RAF1/PTEN/IGF1R	16
chx05231	Choline metabolism in cancer	16/122	98/8892	2.13908e-13	9.26935e-13	1.50111e-13	AKT1/MAPK1/PIK3R3/FOS/MAPK8/HRAS/PIK3CA/KRAS/PIK3CD/RAF1/RPS6KB1/RHEB/TSC2/RPS6KB2/TSC1/LOC102169319	16
chx04660	T cell receptor signaling pathway	16/122	101/8892	3.48819e-13	1.46549e-12	2.37326e-13	AKT1/MAPK1/PIK3R3/FOS/TNF/CHUK/MAPK8/RELA/HRAS/PIK3CA/KRAS/PIK3CD/MAP3K14/NFKBIA/RAF1/MAP3K7	16
chx04935	Growth hormone synthesis, secretion and action	17/122	119/8892	3.52281e-13	1.46549e-12	2.37326e-13	AKT1/MAPK1/PIK3R3/ITPR2/FOS/ITPR1/MAPK8/HRAS/PIK3CA/KRAS/ATF4/PIK3CD/RAF1/PRKACB/PRKACA/IRS2/IRS1	17
chx04380	Osteoclast differentiation	17/122	121/8892	4.66826e-13	1.8673e-12	3.02397e-13	AKT1/MAPK1/CTSK/PIK3R3/FOS/TNF/CHUK/MAPK8/RELA/TRAF2/PIK3CA/PIK3CD/MAP3K14/NFKBIA/MAP3K7/SQSTM1/TRAF6	17
chx04722	Neurotrophin signaling pathway	17/122	121/8892	4.66826e-13	1.8673e-12	3.02397e-13	AKT1/MAPK1/PIK3R3/TP53/MAPK8/BAD/RELA/HRAS/PIK3CA/KRAS/ATF4/PIK3CD/BAX/NFKBIA/RAF1/IRS1/TRAF6	17
chx04137	Mitophagy - animal	14/122	72/8892	6.00129e-13	2.35522e-12	3.81413e-13	TP53/MAPK8/RELA/HRAS/KRAS/ATF4/BCL2L1/RRAS/MRAS/SQSTM1/ATG5/AMBRA1/ULK1/MAP1LC3B	14
chx04215	Apoptosis - multiple species	11/122	35/8892	6.48972e-13	2.49974e-12	4.04817e-13	CASP8/BIRC5/CASP7/BAK1/PMAIP1/MAPK8/LOC102173997/BID/BCL2L1/BBC3/BAX	11
chx04620	Toll-like receptor signaling pathway	16/122	109/8892	1.18811e-12	4.49322e-12	7.27647e-13	AKT1/MAPK1/CASP8/CTSK/PIK3R3/FOS/TNF/RIPK1/CHUK/MAPK8/RELA/PIK3CA/PIK3CD/NFKBIA/MAP3K7/TRAF6	16
chx05164	Influenza A	19/122	174/8892	1.85229e-12	6.87994e-12	1.11416e-12	AKT1/MAPK1/ACTB/CASP8/PIK3R3/EIF2S1/TNF/BAK1/FAS/CHUK/RELA/LOC102173997/PIK3CA/BID/PIK3CD/TRADD/BAX/NFKBIA/RAF1	19
chx04371	Apelin signaling pathway	17/122	139/8892	4.7172e-12	1.72136e-11	2.78763e-12	AKT1/MAPK1/ITPR2/ITPR1/HRAS/KRAS/RAF1/RPS6KB1/PRKACB/RRAS/PIK3C3/RPS6KB2/MRAS/PRKACA/LOC102169319/MAP1LC3B/PRKAA1	17
chx05166	Human T-cell leukemia virus 1 infection	21/122	235/8892	5.767e-12	2.06817e-11	3.34926e-12	AKT1/MAPK1/PIK3R3/FOS/TP53/TNF/CHUK/MAPK8/RELA/HRAS/PIK3CA/KRAS/ATF4/BCL2L1/PIK3CD/BAX/MAP3K14/NFKBIA/PRKACB/PTEN/PRKACA	21
chx04115	p53 signaling pathway	14/122	85/8892	6.5747e-12	2.31786e-11	3.75362e-12	CASP8/GADD45A/TP53/PMAIP1/FAS/LOC102173997/BID/GADD45B/GADD45G/BCL2L1/BBC3/BAX/PTEN/TSC2	14
chx04064	NF-kappa B signaling pathway	15/122	103/8892	7.10401e-12	2.46272e-11	3.98821e-12	GADD45A/BCL2A1/TNF/RIPK1/CHUK/RELA/TRAF2/GADD45B/GADD45G/BCL2L1/TRADD/MAP3K14/NFKBIA/MAP3K7/TRAF6	15
chx05226	Gastric cancer	17/122	152/8892	2.03761e-11	6.94793e-11	1.12517e-11	AKT1/MAPK1/GADD45A/PIK3R3/TP53/BAK1/HRAS/PIK3CA/KRAS/GADD45B/GADD45G/PIK3CD/BAX/RAF1/RPS6KB1/RPS6KB2/LOC102169319	17
chx04621	NOD-like receptor signaling pathway	18/122	178/8892	2.76606e-11	9.13004e-11	1.47855e-11	MAPK1/CASP8/ITPR2/TNF/ITPR1/RIPK1/CHUK/MAPK8/RELA/TRAF2/CTSB/BCL2L1/NFKBIA/MAP3K7/ATG12/ATG5/TRAF6/MAP1LC3B	18
chx04931	Insulin resistance	15/122	113/8892	2.80924e-11	9.13004e-11	1.47855e-11	AKT1/PIK3R3/TNF/MAPK8/RELA/PIK3CA/PIK3CD/NFKBIA/RPS6KB1/PTEN/RPS6KB2/IRS2/IRS1/LOC102169319/PRKAA1	15
chx05142	Chagas disease	15/122	113/8892	2.80924e-11	9.13004e-11	1.47855e-11	AKT1/MAPK1/CASP8/PIK3R3/FOS/TNF/FAS/CHUK/MAPK8/RELA/PIK3CA/PIK3CD/NFKBIA/TRAF6/LOC108637886	15
chx04919	Thyroid hormone signaling pathway	15/122	122/8892	8.62186e-11	2.75899e-10	4.46801e-11	AKT1/MAPK1/ACTB/PIK3R3/TP53/BAD/HRAS/PIK3CA/KRAS/PIK3CD/RAF1/RHEB/PRKACB/TSC2/PRKACA	15
chx05418	Fluid shear stress and atherosclerosis	16/122	144/8892	9.19817e-11	2.89882e-10	4.69444e-11	AKT1/ACTB/PIK3R3/CTSL/FOS/TP53/TNF/CHUK/MAPK8/RELA/PIK3CA/CTSV/PIK3CD/MAP3K7/SQSTM1/PRKAA1	16
chx04662	B cell receptor signaling pathway	12/122	68/8892	9.79831e-11	3.04186e-10	4.92609e-11	AKT1/MAPK1/PIK3R3/FOS/CHUK/RELA/HRAS/PIK3CA/KRAS/PIK3CD/NFKBIA/RAF1	12
chx04012	ErbB signaling pathway	13/122	85/8892	1.02638e-10	3.1395e-10	5.08422e-11	AKT1/MAPK1/PIK3R3/MAPK8/BAD/HRAS/PIK3CA/KRAS/PIK3CD/RAF1/RPS6KB1/RPS6KB2/LOC102169319	13
chx05203	Viral carcinogenesis	19/122	221/8892	1.28298e-10	3.86754e-10	6.26321e-11	MAPK1/CASP8/PIK3R3/TP53/BAK1/PMAIP1/BAD/RELA/HRAS/TRAF2/PIK3CA/KRAS/ATF4/PIK3CD/TRADD/BAX/NFKBIA/PRKACB/PRKACA	19
chx04920	Adipocytokine signaling pathway	12/122	71/8892	1.66414e-10	4.94488e-10	8.0079e-11	AKT1/TNF/CHUK/MAPK8/RELA/TRAF2/TRADD/NFKBIA/STK11/IRS2/IRS1/PRKAA1	12
chx05168	Herpes simplex virus 1 infection	26/122	441/8892	1.7265e-10	5.0579e-10	8.19093e-11	AKT1/CASP8/PIK3R3/EIF2S1/TP53/TNF/DAXX/BAK1/FAS/CHUK/BAD/RELA/TRAF2/LOC102173997/PIK3CA/BID/BCL2L1/PIK3CD/TRADD/BAX/NFKBIA/RHEB/MAP3K7/TSC2/TSC1/TRAF6	26
chx04926	Relaxin signaling pathway	15/122	134/8892	3.33738e-10	9.64132e-10	1.56135e-10	AKT1/MAPK1/PIK3R3/FOS/MAPK8/RELA/HRAS/PIK3CA/KRAS/ATF4/PIK3CD/NFKBIA/RAF1/PRKACB/PRKACA	15
chx04915	Estrogen signaling pathway	15/122	136/8892	4.12451e-10	1.1752e-09	1.90316e-10	AKT1/MAPK1/PIK3R3/ITPR2/FOS/ITPR1/CTSD/HRAS/PIK3CA/KRAS/ATF4/PIK3CD/RAF1/PRKACB/PRKACA	15
chx05152	Tuberculosis	17/122	186/8892	5.10417e-10	1.43469e-09	2.32338e-10	AKT1/MAPK1/CASP8/CTSS/TNF/MAPK8/BAD/CTSD/RELA/LOC102173997/BID/TRADD/BAX/RAF1/LAMP2/PIK3C3/TRAF6	17
chx05207	Chemical carcinogenesis - receptor activation	18/122	220/8892	9.27604e-10	2.54234e-09	4.11714e-10	AKT1/MAPK1/PIK3R3/FOS/BIRC5/BAD/RELA/HRAS/PIK3CA/KRAS/ATF4/PIK3CD/RAF1/RPS6KB1/PRKACB/RPS6KB2/PRKACA/LOC102169319	18
chx05135	Yersinia infection	15/122	144/8892	9.28931e-10	2.54234e-09	4.11714e-10	AKT1/MAPK1/ACTB/PIK3R3/FOS/TNF/CHUK/MAPK8/RELA/TRAF2/PIK3CA/PIK3CD/NFKBIA/MAP3K7/TRAF6	15
chx05216	Thyroid cancer	9/122	37/8892	1.15241e-09	3.113e-09	5.0413e-10	MAPK1/GADD45A/TP53/BAK1/HRAS/KRAS/GADD45B/GADD45G/BAX	9
chx04622	RIG-I-like receptor signaling pathway	13/122	106/8892	1.73628e-09	4.63009e-09	7.49812e-10	CASP8/TNF/RIPK1/CHUK/MAPK8/RELA/TRAF2/TRADD/NFKBIA/MAP3K7/ATG12/ATG5/TRAF6	13
chx04725	Cholinergic synapse	13/122	111/8892	3.09354e-09	8.14502e-09	1.31903e-09	AKT1/MAPK1/PIK3R3/ITPR2/FOS/ITPR1/HRAS/PIK3CA/KRAS/ATF4/PIK3CD/PRKACB/PRKACA	13
chx04014	Ras signaling pathway	18/122	238/8892	3.2931e-09	8.56207e-09	1.38657e-09	AKT1/MAPK1/PIK3R3/CHUK/MAPK8/BAD/RELA/HRAS/PIK3CA/KRAS/BCL2L1/PIK3CD/RAF1/PRKACB/RRAS/MRAS/PRKACA/IGF1R	18
chx05145	Toxoplasmosis	13/122	112/8892	3.45971e-09	8.88419e-09	1.43874e-09	AKT1/MAPK1/CASP8/TNF/CHUK/MAPK8/BAD/RELA/LOC102173997/BCL2L1/NFKBIA/MAP3K7/TRAF6	13
chx04657	IL-17 signaling pathway	12/122	93/8892	4.20208e-09	1.06589e-08	1.72614e-09	MAPK1/CASP8/FOS/TNF/CHUK/MAPK8/RELA/TRAF2/TRADD/NFKBIA/MAP3K7/TRAF6	12
chx04917	Prolactin signaling pathway	11/122	79/8892	8.46234e-09	2.12068e-08	3.4343e-09	AKT1/MAPK1/PIK3R3/FOS/MAPK8/RELA/HRAS/PIK3CA/KRAS/PIK3CD/RAF1	11
chx04929	GnRH secretion	10/122	63/8892	1.12831e-08	2.79391e-08	4.52454e-09	AKT1/MAPK1/PIK3R3/ITPR2/ITPR1/HRAS/PIK3CA/KRAS/PIK3CD/RAF1	10
chx04664	Fc epsilon RI signaling pathway	10/122	65/8892	1.54436e-08	3.77915e-08	6.12007e-09	AKT1/MAPK1/PIK3R3/TNF/MAPK8/HRAS/PIK3CA/KRAS/PIK3CD/RAF1	10
chx04936	Alcoholic liver disease	14/122	151/8892	1.60144e-08	3.87325e-08	6.27248e-09	AKT1/CASP8/TNF/RIPK1/FAS/CHUK/MAPK8/RELA/TRADD/MAP3K14/NFKBIA/MAP3K7/TRAF6/PRKAA1	14
chx05230	Central carbon metabolism in cancer	10/122	68/8892	2.42306e-08	5.79305e-08	9.38146e-09	AKT1/MAPK1/PIK3R3/TP53/HRAS/PIK3CA/KRAS/PIK3CD/RAF1/PTEN	10
chx05016	Huntington disease	19/122	307/8892	3.14345e-08	7.42997e-08	1.20323e-08	CASP8/TP53/ITPR1/MAPK8/TRAF2/LOC102173997/TUBA1A/BBC3/BAX/ERN1/PIK3C3/NRBF2/ATG2A/ATG13/AMBRA1/ULK1/WIPI1/ULK2/ATG2B	19
chx04914	Progesterone-mediated oocyte maturation	11/122	92/8892	4.33234e-08	1.0125e-07	1.63968e-08	AKT1/MAPK1/PIK3R3/MAPK8/PIK3CA/KRAS/PIK3CD/RAF1/PRKACB/PRKACA/IGF1R	11
chx04370	VEGF signaling pathway	9/122	56/8892	5.63982e-08	1.30342e-07	2.11081e-08	AKT1/MAPK1/PIK3R3/BAD/HRAS/PIK3CA/KRAS/PIK3CD/RAF1	9
chx04072	Phospholipase D signaling pathway	13/122	147/8892	9.47027e-08	2.16463e-07	3.50548e-08	AKT1/MAPK1/PIK3R3/HRAS/PIK3CA/KRAS/PIK3CD/RAF1/RHEB/RRAS/TSC2/MRAS/TSC1	13
chx05208	Chemical carcinogenesis - reactive oxygen species	16/122	237/8892	1.30366e-07	2.94741e-07	4.77313e-08	AKT1/MAPK1/PIK3R3/FOS/CHUK/MAPK8/BAD/RELA/HRAS/PIK3CA/KRAS/PIK3CD/MAP3K14/NFKBIA/RAF1/PTEN	16
chx04930	Type II diabetes mellitus	8/122	46/8892	1.68206e-07	3.76203e-07	6.09236e-08	MAPK1/PIK3R3/TNF/MAPK8/PIK3CA/PIK3CD/IRS2/IRS1	8
chx04650	Natural killer cell mediated cytotoxicity	13/122	156/8892	1.90932e-07	4.22488e-07	6.84191e-08	MAPK1/PIK3R3/TNF/PRF1/LOC102176598/FAS/HRAS/PIK3CA/KRAS/BID/PIK3CD/LOC102168343/RAF1	13
chx04933	AGE-RAGE signaling pathway in diabetic complications	11/122	107/8892	2.1004e-07	4.59877e-07	7.4474e-08	AKT1/MAPK1/PIK3R3/TNF/MAPK8/RELA/HRAS/PIK3CA/KRAS/PIK3CD/BAX	11
chx04720	Long-term potentiation	9/122	66/8892	2.45607e-07	5.32149e-07	8.61779e-08	MAPK1/ITPR2/ITPR1/HRAS/KRAS/ATF4/RAF1/PRKACB/PRKACA	9
chx04062	Chemokine signaling pathway	14/122	188/8892	2.55062e-07	5.46937e-07	8.85727e-08	AKT1/MAPK1/PIK3R3/CHUK/BAD/RELA/HRAS/PIK3CA/KRAS/PIK3CD/NFKBIA/RAF1/PRKACB/PRKACA	14
chx05211	Renal cell carcinoma	9/122	69/8892	3.63295e-07	7.67797e-07	1.2434e-07	AKT1/MAPK1/PIK3R3/BAD/HRAS/PIK3CA/KRAS/PIK3CD/RAF1	9
chx04142	Lysosome	12/122	138/8892	3.65442e-07	7.67797e-07	1.2434e-07	CTSH/CTSK/CTSS/CTSL/CTSW/CTSC/CTSD/CTSB/CTSV/CTSZ/CTSO/LAMP2	12
chx04912	GnRH signaling pathway	10/122	91/8892	4.10845e-07	8.54558e-07	1.3839e-07	MAPK1/ITPR2/ITPR1/MAPK8/HRAS/KRAS/ATF4/RAF1/PRKACB/PRKACA	10
chx04217	Necroptosis	13/122	170/8892	5.18612e-07	1.06803e-06	1.72961e-07	CAPN1/CASP8/TNF/RIPK1/FAS/MAPK8/TRAF2/BID/CAPN2/TRADD/BAX/SQSTM1/HMGB1	13
chx05020	Prion disease	16/122	271/8892	8.05686e-07	1.64297e-06	2.66068e-07	MAPK1/PIK3R3/ITPR2/EIF2S1/TNF/ITPR1/MAPK8/BAD/LOC102173997/PIK3CA/TUBA1A/ATF4/PIK3CD/BAX/PRKACB/PRKACA	16
chx04730	Long-term depression	8/122	60/8892	1.40516e-06	2.81033e-06	4.55113e-07	MAPK1/ITPR2/ITPR1/HRAS/KRAS/RAF1/LOC108637886/IGF1R	8
chx04923	Regulation of lipolysis in adipocytes	8/122	60/8892	1.40516e-06	2.81033e-06	4.55113e-07	AKT1/PIK3R3/PIK3CA/PIK3CD/PRKACB/PRKACA/IRS2/IRS1	8
chx04066	HIF-1 signaling pathway	10/122	112/8892	2.84002e-06	5.62594e-06	9.11084e-07	AKT1/MAPK1/PIK3R3/RELA/PIK3CA/PIK3CD/RPS6KB1/RPS6KB2/LOC102169319/IGF1R	10
chx04540	Gap junction	9/122	88/8892	2.94397e-06	5.77684e-06	9.3552e-07	MAPK1/ITPR2/ITPR1/HRAS/TUBA1A/KRAS/RAF1/PRKACB/PRKACA	9
chx04024	cAMP signaling pathway	14/122	237/8892	4.12219e-06	7.93903e-06	1.28567e-06	AKT1/MAPK1/PIK3R3/FOS/MAPK8/BAD/RELA/PIK3CA/PIK3CD/NFKBIA/RAF1/PRKACB/RRAS/PRKACA	14
chx04714	Thermogenesis	14/122	237/8892	4.12219e-06	7.93903e-06	1.28567e-06	ACTB/HRAS/KRAS/RPS6KB1/RHEB/PRKACB/TSC2/RPS6KB2/PRKACA/TSC1/LOC102169319/AKT1S1/RPTOR/PRKAA1	14
chx04510	Focal adhesion	13/122	205/8892	4.28597e-06	8.17873e-06	1.32449e-06	AKT1/MAPK1/ACTB/PIK3R3/MAPK8/BAD/HRAS/PIK3CA/CAPN2/PIK3CD/RAF1/PTEN/IGF1R	13
chx04070	Phosphatidylinositol signaling system	9/122	97/8892	6.64041e-06	1.24433e-05	2.01511e-06	PIK3R3/ITPR2/ITPR1/PIK3CA/PIK3CD/PTEN/MTMR14/PIK3C3/MTMR4	9
chx04666	Fc gamma R-mediated phagocytosis	9/122	97/8892	6.64041e-06	1.24433e-05	2.01511e-06	AKT1/MAPK1/PIK3R3/PIK3CA/PIK3CD/RAF1/RPS6KB1/RPS6KB2/LOC102169319	9
chx04921	Oxytocin signaling pathway	11/122	153/8892	7.434e-06	1.3806e-05	2.23579e-06	MAPK1/ACTB/ITPR2/FOS/ITPR1/HRAS/KRAS/RAF1/PRKACB/PRKACA/PRKAA1	11
chx04611	Platelet activation	10/122	129/8892	1.01449e-05	1.86738e-05	3.0241e-06	AKT1/MAPK1/ACTB/PIK3R3/ITPR2/ITPR1/PIK3CA/PIK3CD/PRKACB/PRKACA	10
chx04960	Aldosterone-regulated sodium reabsorption	6/122	38/8892	1.13675e-05	2.07343e-05	3.35779e-06	MAPK1/PIK3R3/PIK3CA/KRAS/PIK3CD/IRS1	6
chx05206	MicroRNAs in cancer	14/122	259/8892	1.14637e-05	2.07343e-05	3.35779e-06	MAPK1/PIK3R3/TP53/BAK1/HRAS/MCL1/PIK3CA/KRAS/PIK3CD/RAF1/PTEN/IRS2/IRS1/RPTOR	14
chx05219	Bladder cancer	6/122	39/8892	1.32847e-05	2.38208e-05	3.85762e-06	MAPK1/TP53/HRAS/KRAS/RAF1/DAPK3	6
chx05134	Legionellosis	7/122	59/8892	1.4546e-05	2.58595e-05	4.18777e-06	CASP8/TNF/CASP7/RELA/LOC102173997/NFKBIA/RAB1A	7
chx05202	Transcriptional misregulation in cancer	12/122	198/8892	1.61984e-05	2.85532e-05	4.62399e-06	GADD45A/TP53/BCL2A1/LOC102176598/BAK1/RELA/GADD45B/GADD45G/BCL2L1/BAX/LOC102168343/IGF1R	12
chx05012	Parkinson disease	14/122	271/8892	1.91223e-05	3.34238e-05	5.41277e-06	ITPR2/EIF2S1/TP53/ITPR1/DAXX/MAPK8/LOC102173997/TUBA1A/ATF4/BCL2L1/BAX/ERN1/PRKACB/PRKACA	14
chx04015	Rap1 signaling pathway	12/122	211/8892	3.05448e-05	5.29443e-05	8.57397e-06	AKT1/MAPK1/ACTB/PIK3R3/HRAS/PIK3CA/KRAS/PIK3CD/RAF1/RRAS/MRAS/IGF1R	12
chx05140	Leishmaniasis	7/122	74/8892	6.47425e-05	0.000111293	1.80231e-05	MAPK1/FOS/TNF/RELA/NFKBIA/MAP3K7/TRAF6	7
chx05133	Pertussis	7/122	77/8892	8.36292e-05	0.000141436	2.29047e-05	MAPK1/FOS/TNF/CASP7/MAPK8/RELA/TRAF6	7
chx04728	Dopaminergic synapse	9/122	133/8892	8.36379e-05	0.000141436	2.29047e-05	AKT1/ITPR2/FOS/ITPR1/MAPK8/ATF4/PRKACB/PRKACA/LOC108637886	9
chx04928	Parathyroid hormone synthesis, secretion and action	8/122	106/8892	9.79284e-05	0.000164267	2.6602e-05	MAPK1/ITPR2/FOS/ITPR1/ATF4/RAF1/PRKACB/PRKACA	8
chx04613	Neutrophil extracellular trap formation	11/122	205/8892	0.00011209	0.000186517	3.02052e-05	AKT1/MAPK1/ACTB/PIK3R3/RELA/PIK3CA/PIK3CD/RAF1/MAP3K7/HMGB1/ATG7	11
chx04550	Signaling pathways regulating pluripotency of stem cells	9/122	142/8892	0.000138448	0.000228548	3.70119e-05	AKT1/MAPK1/PIK3R3/HRAS/PIK3CA/KRAS/PIK3CD/RAF1/IGF1R	9
chx04750	Inflammatory mediator regulation of TRP channels	8/122	113/8892	0.000153419	0.000251269	4.06913e-05	PIK3R3/ITPR2/ITPR1/MAPK8/PIK3CA/PIK3CD/PRKACB/PRKACA	8
chx05217	Basal cell carcinoma	6/122	63/8892	0.00021157	0.000343801	5.56763e-05	GADD45A/TP53/BAK1/GADD45B/GADD45G/BAX	6
chx04726	Serotonergic synapse	8/122	123/8892	0.000275519	0.000444248	7.1943e-05	MAPK1/ITPR2/ITPR1/HRAS/KRAS/RAF1/PRKACB/PRKACA	8
chx04810	Regulation of actin cytoskeleton	11/122	231/8892	0.000318653	0.000509845	8.2566e-05	AKT1/MAPK1/ACTB/PIK3R3/HRAS/PIK3CA/KRAS/PIK3CD/RAF1/RRAS/MRAS	11
chx00562	Inositol phosphate metabolism	6/122	72/8892	0.000440071	0.000698738	0.000113156	PIK3CA/PIK3CD/PTEN/MTMR14/PIK3C3/MTMR4	6
chx04022	cGMP-PKG signaling pathway	9/122	168/8892	0.000486196	0.000766128	0.000124069	AKT1/MAPK1/ITPR2/ITPR1/BAD/ATF4/RAF1/IRS2/IRS1	9
chx04141	Protein processing in endoplasmic reticulum	9/122	171/8892	0.000553057	0.000864932	0.00014007	CAPN1/EIF2S1/BAK1/MAPK8/TRAF2/ATF4/CAPN2/BAX/ERN1	9
chx04922	Glucagon signaling pathway	7/122	105/8892	0.000576952	0.000895567	0.000145031	AKT1/ITPR2/ITPR1/ATF4/PRKACB/PRKACA/PRKAA1	7
chx05330	Allograft rejection	5/122	53/8892	0.000759248	0.0011698	0.000189442	TNF/PRF1/LOC102176598/FAS/LOC102168343	5
chx04530	Tight junction	9/122	179/8892	0.000769047	0.00117619	0.000190476	ACTB/MAPK8/TUBA1A/RAB8A/PRKACB/STK11/PRKACA/LOC108637886/PRKAA1	9
chx05171	Coronavirus disease - COVID-19	12/122	301/8892	0.000844855	0.0012827	0.000207725	MAPK1/PIK3R3/FOS/TNF/CHUK/MAPK8/RELA/PIK3CA/PIK3CD/NFKBIA/MAP3K7/TRAF6	12
chx05146	Amoebiasis	7/122	118/8892	0.00115441	0.00173997	0.000281777	PIK3R3/TNF/RELA/PIK3CA/PIK3CD/PRKACB/PRKACA	7
chx04658	Th1 and Th2 cell differentiation	6/122	88/8892	0.00127766	0.00191189	0.000309619	MAPK1/FOS/CHUK/MAPK8/RELA/NFKBIA	6
chx04940	Type I diabetes mellitus	5/122	60/8892	0.00133888	0.0019892	0.000322137	TNF/PRF1/LOC102176598/FAS/LOC102168343	5
chx04114	Oocyte meiosis	7/122	123/8892	0.00147012	0.00216869	0.000351204	MAPK1/ITPR2/ITPR1/PRKACB/PRKACA/LOC108637886/IGF1R	7
chx05332	Graft-versus-host disease	5/122	62/8892	0.00155221	0.00227366	0.000368204	TNF/PRF1/LOC102176598/FAS/LOC102168343	5
chx04927	Cortisol synthesis and secretion	5/122	65/8892	0.00191772	0.00278941	0.000451727	ITPR2/ITPR1/ATF4/PRKACB/PRKACA	5
chx04350	TGF-beta signaling pathway	6/122	96/8892	0.00200001	0.0028889	0.000467838	MAPK1/TNF/RPS6KB1/RPS6KB2/LOC102169319/LOC108637886	6
chx04630	JAK-STAT signaling pathway	9/122	206/8892	0.00205531	0.00294831	0.000477459	AKT1/PIK3R3/HRAS/IL3RA/MCL1/PIK3CA/BCL2L1/PIK3CD/RAF1	9
chx05416	Viral myocarditis	5/122	67/8892	0.00219404	0.00312576	0.000506196	ACTB/CASP8/PRF1/LOC102173997/BID	5
chx04916	Melanogenesis	6/122	100/8892	0.00246024	0.00348115	0.000563749	MAPK1/HRAS/KRAS/RAF1/PRKACB/PRKACA	6
chx05415	Diabetic cardiomyopathy	9/122	219/8892	0.00310655	0.00436596	0.000707037	AKT1/PIK3R3/MAPK8/CTSD/RELA/PIK3CA/PIK3CD/PTEN/IRS1	9
chx04659	Th17 cell differentiation	6/122	105/8892	0.00314263	0.00438702	0.000710449	MAPK1/FOS/CHUK/MAPK8/RELA/NFKBIA	6
chx04924	Renin secretion	5/122	73/8892	0.00319721	0.00443346	0.000717969	ITPR2/ITPR1/CTSB/PRKACB/PRKACA	5
chx04360	Axon guidance	8/122	180/8892	0.00326866	0.00450252	0.000729154	MAPK1/PIK3R3/HRAS/PIK3CA/KRAS/PIK3CD/RAF1/RRAS	8
chx04918	Thyroid hormone synthesis	5/122	76/8892	0.0038067	0.00518807	0.000840173	ITPR2/ITPR1/ATF4/PRKACB/PRKACA	5
chx04973	Carbohydrate digestion and absorption	4/122	47/8892	0.00381622	0.00518807	0.000840173	AKT1/PIK3R3/PIK3CA/PIK3CD	4
chx04216	Ferroptosis	4/122	48/8892	0.00411966	0.00556421	0.000901087	TP53/ATG5/MAP1LC3B/ATG7	4
chx04971	Gastric acid secretion	5/122	79/8892	0.00449535	0.00603248	0.000976919	ACTB/ITPR2/ITPR1/PRKACB/PRKACA	5
chx05030	Cocaine addiction	4/122	50/8892	0.00477464	0.00636618	0.00103096	RELA/ATF4/PRKACB/PRKACA	4
chx04612	Antigen processing and presentation	5/122	83/8892	0.00554595	0.0073475	0.00118988	CTSS/CTSL/TNF/CTSB/CTSV	5
chx04145	Phagosome	7/122	165/8892	0.00750611	0.00988146	0.00160024	ACTB/CTSS/CTSL/TUBA1A/CTSV/LAMP2/PIK3C3	7
chx05323	Rheumatoid arthritis	5/122	94/8892	0.009311	0.0121804	0.00197254	CTSK/CTSL/FOS/TNF/CTSV	5
chx04925	Aldosterone synthesis and secretion	5/122	95/8892	0.00972295	0.0125613	0.00203422	ITPR2/ITPR1/ATF4/PRKACB/PRKACA	5
chx05414	Dilated cardiomyopathy	5/122	95/8892	0.00972295	0.0125613	0.00203422	ACTB/TNF/LMNA/PRKACB/PRKACA	5
chx04713	Circadian entrainment	5/122	98/8892	0.0110338	0.0141669	0.00229423	MAPK1/FOS/ITPR1/PRKACB/PRKACA	5
chx04623	Cytosolic DNA-sensing pathway	4/122	64/8892	0.0113783	0.0145196	0.00235135	RIPK1/CHUK/RELA/NFKBIA	4
chx05320	Autoimmune thyroid disease	4/122	65/8892	0.0119987	0.0152179	0.00246443	PRF1/LOC102176598/FAS/LOC102168343	4
chx04270	Vascular smooth muscle contraction	6/122	145/8892	0.0146101	0.0183066	0.00296463	MAPK1/ITPR2/ITPR1/RAF1/PRKACB/PRKACA	6
chx04723	Retrograde endocannabinoid signaling	6/122	145/8892	0.0146101	0.0183066	0.00296463	MAPK1/ITPR2/ITPR1/MAPK8/PRKACB/PRKACA	6
chx05031	Amphetamine addiction	4/122	70/8892	0.0154252	0.0192122	0.00311129	FOS/ATF4/PRKACB/PRKACA	4
chx04520	Adherens junction	4/122	71/8892	0.016177	0.0200287	0.00324351	MAPK1/ACTB/MAP3K7/IGF1R	4
chx04261	Adrenergic signaling in cardiomyocytes	6/122	151/8892	0.0175221	0.0215657	0.00349241	AKT1/MAPK1/ATF4/PRKACB/PRKACA/LOC108637886	6
chx04724	Glutamatergic synapse	5/122	111/8892	0.0181099	0.022158	0.00358834	MAPK1/ITPR2/ITPR1/PRKACB/PRKACA	5
chx04934	Cushing syndrome	6/122	155/8892	0.0196718	0.0239283	0.00387503	MAPK1/ITPR2/ITPR1/ATF4/PRKACB/PRKACA	6
chx05034	Alcoholism	7/122	203/8892	0.0214958	0.0259949	0.0042097	MAPK1/HRAS/KRAS/ATF4/RAF1/PRKACB/PRKACA	7
chx05100	Bacterial invasion of epithelial cells	4/122	78/8892	0.0220847	0.0265171	0.00429426	ACTB/PIK3R3/PIK3CA/PIK3CD	4
chx01523	Antifolate resistance	3/122	44/8892	0.0221826	0.0265171	0.00429426	TNF/CHUK/RELA	3
chx05410	Hypertrophic cardiomyopathy	4/122	91/8892	0.0361795	0.0430019	0.00696388	ACTB/TNF/LMNA/PRKAA1	4
chx04970	Salivary secretion	4/122	93/8892	0.0387186	0.0457584	0.00741027	ITPR2/ITPR1/PRKACB/PRKACA	4
chx04913	Ovarian steroidogenesis	3/122	64/8892	0.0574003	0.0674534	0.0109236	PRKACB/PRKACA/IGF1R	3
chx04670	Leukocyte transendothelial migration	4/122	113/8892	0.0695761	0.0813025	0.0131664	ACTB/PIK3R3/PIK3CA/PIK3CD	4
chx03410	Base excision repair	2/122	32/8892	0.0709158	0.082405	0.0133449	PARP4/HMGB1	2
chx04130	SNARE interactions in vesicular transport	2/122	34/8892	0.0788196	0.0910804	0.0147499	SNAP29/STX17	2
chx04310	Wnt signaling pathway	5/122	171/8892	0.0859023	0.0987165	0.0159865	TP53/MAPK8/PRKACB/MAP3K7/PRKACA	5
chx05143	African trypanosomiasis	2/122	39/8892	0.0996762	0.113916	0.0184479	TNF/FAS	2
chx04110	Cell cycle	4/122	130/8892	0.10331	0.117423	0.0190159	GADD45A/TP53/GADD45B/GADD45G	4
chx04911	Insulin secretion	3/122	87/8892	0.117056	0.132324	0.021429	ATF4/PRKACB/PRKACA	3
chx04962	Vasopressin-regulated water reabsorption	2/122	47/8892	0.135705	0.152576	0.0247087	PRKACB/PRKACA	2
chx04961	Endocrine and other factor-regulated calcium reabsorption	2/122	52/8892	0.159481	0.178344	0.0288817	PRKACB/PRKACA	2
chx04390	Hippo signaling pathway	4/122	157/8892	0.169062	0.188048	0.030453	ACTB/BIRC5/BBC3/LOC108637886	4
chx04972	Pancreatic secretion	3/122	105/8892	0.1746	0.193174	0.0312832	ITPR2/ITPR1/RAB8A	3
chx04340	Hedgehog signaling pathway	2/122	56/8892	0.179013	0.197009	0.0319043	PRKACB/PRKACA	2
chx05321	Inflammatory bowel disease	2/122	63/8892	0.213965	0.234235	0.0379328	TNF/RELA	2
chx04144	Endocytosis	5/122	255/8892	0.272194	0.29642	0.0480033	HRAS/RAB8A/SH3GLB1/TRAF6/IGF1R	5
chx05412	Arrhythmogenic right ventricular cardiomyopathy	2/122	78/8892	0.2903	0.314491	0.0509298	ACTB/LMNA	2
chx05310	Asthma	1/122	26/8892	0.302117	0.325598	0.0527284	TNF	1
chx04742	Taste transduction	2/122	84/8892	0.320759	0.343907	0.0556934	PRKACB/PRKACA	2
chx04727	GABAergic synapse	2/122	89/8892	0.345908	0.368969	0.059752	PRKACB/PRKACA	2
chx05032	Morphine addiction	2/122	91/8892	0.355888	0.377677	0.0611622	PRKACB/PRKACA	2
chx04710	Circadian rhythm	1/122	36/8892	0.392459	0.414373	0.0671049	PRKAA1	1
chx04020	Calcium signaling pathway	4/122	238/8892	0.413167	0.434034	0.070289	ITPR2/ITPR1/PRKACB/PRKACA	4
chx04640	Hematopoietic cell lineage	2/122	104/8892	0.419266	0.438227	0.070968	TNF/IL3RA	2
chx04976	Bile secretion	2/122	109/8892	0.442818	0.460531	0.0745799	PRKACB/PRKACA	2
chx04672	Intestinal immune network for IgA production	1/122	45/8892	0.463794	0.479946	0.0777241	MAP3K14	1
chx05144	Malaria	1/122	52/8892	0.513478	0.528729	0.0856242	TNF	1
chx03015	mRNA surveillance pathway	1/122	97/8892	0.740088	0.758316	0.122804	LOC108637886	1
chx04061	Viral protein interaction with cytokine and cytokine receptor	1/122	100/8892	0.750756	0.765476	0.123964	TNF	1
chx04060	Cytokine-cytokine receptor interaction	3/122	338/8892	0.848445	0.860861	0.139411	TNF/FAS/IL3RA	3
chx00190	Oxidative phosphorylation	1/122	139/8892	0.855644	0.863952	0.139911	LOC102173997	1
chx04120	Ubiquitin mediated proteolysis	1/122	149/8892	0.874558	0.876308	0.141912	TRAF6	1
chx05322	Systemic lupus erythematosus	1/122	150/8892	0.876308	0.876308	0.141912	TNF	1
